# Supplementary material for: Development and Genome-Wide Analysis of a Blast-Resistant japonica Rice Variety
Source: MDPI journal article supplement (doi:10.3390/plants12203536), 2023-10-11
Supplement: s1 [file s1]

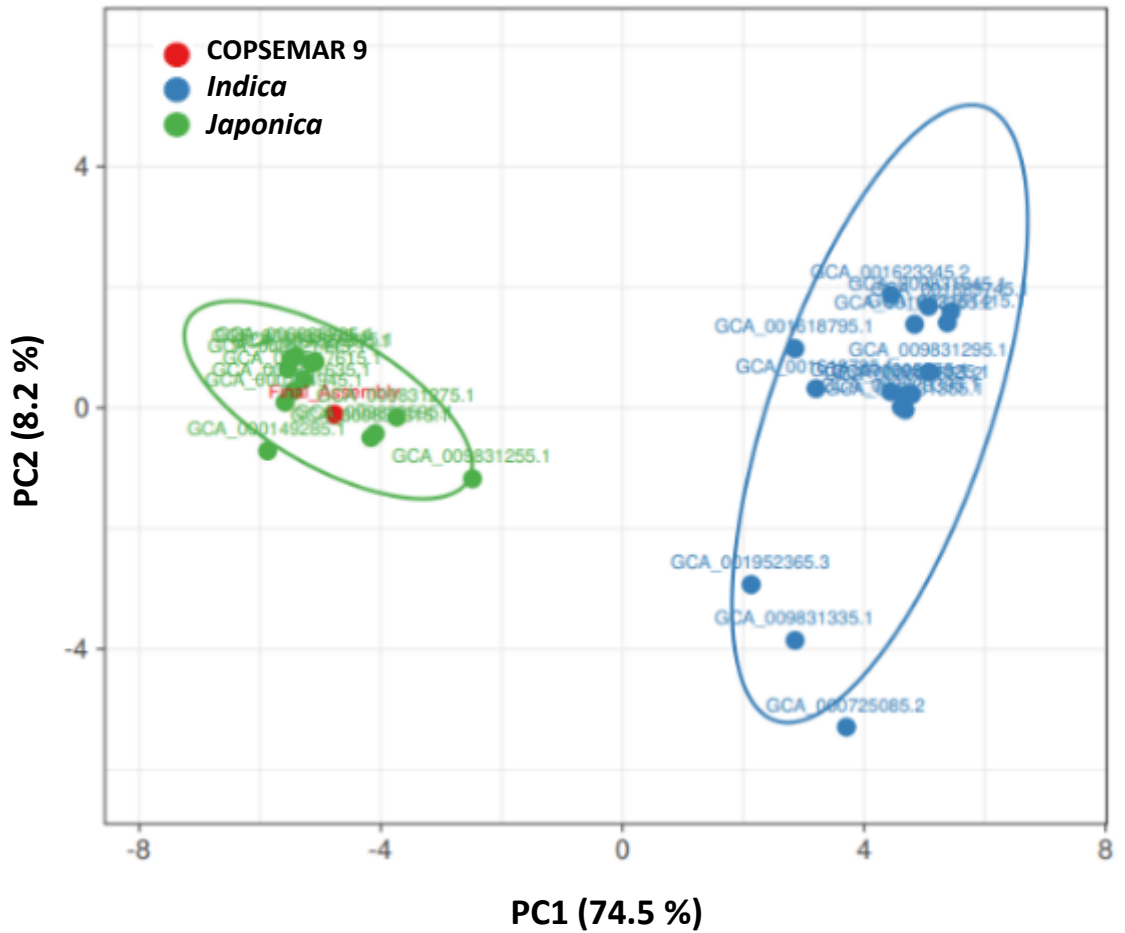

**Figure S3.** PCA analysis based on the distance of the *indica*, *japonica* and COPSEMAR 9 genomes. Each point represents a genome which is labeled as *indica*, *japonica* or COPSEMAR 9 (blue, green and red, respectively). Genome sequences were retrieved from the NCBI Genomes database. The rice varieties (and accessions) used for this analysis were the following. For *japonica* varieties: Nipponbare (GCA\_000149285.1; GCA\_003865235.1; and GCF\_001433935.1); Kitaake (GCA\_009797565.1); Zhonghua 11 (GCA\_014526345.1); Azucena (GCA\_009830595.1); Koshihikari (GCA\_000164945.1); Hitomebore (GCA\_000321445.1); HEG4 (GCA\_000817615.1); A123 (GCA\_000817635.1); ARC 10497::IRGC 12485-1 (GCA\_009831255.1); KETAN NANGKA::IRGC 19961-2 (GCA\_009831275.1); and CHAO MEO::IRGC 80273-1 (GCA\_009831315.1). For *indica* varieties: R498/Shuhui498 (GCA\_002151415.1); LIMA::IRGC 81487-1 (GCA\_009829395.1); IR8 (GCA\_001889745.1); Minghui63 (GCA\_001618785.1; GCA\_001623365.2); Zhenshan97 (GCA\_001618795.1; GCA\_001623345.2); PR 106::IRGC 53418-1 (GCA\_009831045.1); HR-12 (GCA\_000725085.2); N 22::IRGC 19379-1 (IRGC 117534, GCA\_001952365.3); GOBOL SAIL (BALAM)::IRGC 26624-2 (GCA\_009831025.1); RP Bio-226 (GCA\_001305255.1); 93-11 (GCA\_000004655.2); KHAO YAI GUANG::IRGC 65972-1 (GCA\_009831295.1); NATEL BORO::IRGC 34749-1 (GCA\_009831335.1); and LARHA MUGAD::IRGC 52339-1 (GCA\_009831355.1).
