# Supplementary material for: Development and Genome-Wide Analysis of a Blast-Resistant japonica Rice Variety
Source: MDPI journal article supplement (doi:10.3390/plants12203536), 2023-10-11
Supplement: s1 [file s1]

**Supplemental Table S4. List of Resistance (R) genes and defense-related genes identified in the genome of *COPEMAR9*. The DRAGO2 pipeline was used on the predicted proteome to identify and classify Resistance (R) and defense regulator genes. In red, blast resistance (P) genes. CC-NBS-LRR, Collected Nucleotide-Binding Site-Leucine-Rich Repeat; TM, transmembrane.**

| Locus                                           | Assignment Variants | Assignment Similarity | Resistance Gene Class | Japonica Locus           | Indica Locus              | Description                                                                                |
|-------------------------------------------------|---------------------|-----------------------|-----------------------|--------------------------|---------------------------|--------------------------------------------------------------------------------------------|
| maker-8-augustus-gene-60.8-mRNA-1               | Indica              | Indica                | CC-Kinase-LRR-TM      | Os08g0201700             | OsR498G0815385700.01.T13  | Non-specific serine/threonine protein kinase                                               |
| augustus_masked-3-processed-gene-134.57-mRNA-1  | Japonica            | NA                    | CC-Kinase-LRR-TM      | Os10g0513700             | OsR498G110988800.01.T01   | LRR receptor-like serine/threonine protein kinase                                          |
| maker-3-augustus-gene-102.2-mRNA-1              | Japonica            | Indica                | CC-Kinase-LRR-TM      | Os03g0297800             | OsR498G0305757700.01.T01  | Probably inactive leucine-rich repeat receptor-like protein kinase IMK2                    |
| maker-4-augustus-gene-70.0-mRNA-1               | Japonica            | Japonica              | CC-Kinase-LRR-TM      | Os04g0291900             | OsR498G0510192800.01.T08  | Non-specific serine/threonine protein kinase                                               |
| maker-9-augustus-gene-154.29-mRNA-1             | Japonica            | Japonica              | CC-Kinase-LRR-TM      | Os07g0423000             | OsR498G0917480300.01.T01  | putative leucine-rich repeat receptor-like serine/threonine protein kinase At2g24130       |
| maker-8-augustus-gene-60.8-mRNA-1               | NA                  | Indica                | CC-Kinase-LRR-TM      | Os08g0201700             | OsR498G0815385700.01.T13  | Non-specific serine/threonine protein kinase                                               |
| maker-9-augustus-gene-154.29-mRNA-1             | NA                  | Japonica              | CC-Kinase-LRR-TM      | Os07g0423000             | OsR498G0917480300.01.T01  | putative leucine-rich repeat receptor-like serine/threonine protein kinase At2g24130       |
| augustus-1-processed-gene-8.0-mRNA-1            | Indica              | Indica                | CC-Kinase-TM          | Os11g0113350             | OsR498G100044500.01.T01   | Putative receptor serine/threonine kinase PRK3                                             |
| maker-10-augustus-gene-1.0-mRNA-1               | Indica              | Indica                | CC-Kinase-TM          | Os10g1005000             | OsR498G1017994900.01.T04  | E3 ubiquitin ligase                                                                        |
| maker-10-augustus-gene-61.19-mRNA-1             | Indica              | NA                    | CC-Kinase-TM          | Os03g0251700             | OsR498G0305588100.01.T01  | Receptor-like serine/threonine protein kinase                                              |
| maker-11-augustus-gene-247.0-mRNA-1             | Indica              | NA                    | CC-Kinase-TM          | 0                        | 0                         | S-receptor kinase-like protein 1-like                                                      |
| maker-4-augustus-gene-125.39-mRNA-1             | Indica              | NA                    | CC-Kinase-TM          | 0                        | 0                         | Jacalin-like lectin domain containing protein                                              |
| augustus-1-processed-gene-151.21-mRNA-1         | Japonica            | Indica                | CC-Kinase-TM          | Os01g0364400             | OsR498G0100957400.01.T01  | Wall-associated receptor kinase 3                                                          |
| augustus-11-processed-gene-8.94-mRNA-1          | Japonica            | NA                    | CC-Kinase-TM          | Os11g0132900             | OsR498G1119371300.01.T01  | Non-specific serine/threonine protein kinase                                               |
| augustus-2-processed-gene-257.1-mRNA-1          | Japonica            | Japonica              | CC-Kinase-TM          | Os02g0263300             | OsR498G0204350900.01.T01  | Phosphoenolpyruvate carboxylase kinase                                                     |
| augustus-8-processed-gene-86.28-mRNA-1          | Japonica            | Japonica              | CC-Kinase-TM          | Os08g0230800             | OsR498G0815488100.01.T01  | Non-specific serine/threonine protein kinase                                               |
| augustus_masked-11-processed-gene-244.4-mRNA-1  | Japonica            | NA                    | CC-Kinase-TM          | Os11g0664000             | OsR498G1120691000.01.T01  | L-type lectin domain-containing receptor kinase IX.1                                       |
| augustus_masked-3-processed-gene-142.65-mRNA-1  | Japonica            | NA                    | CC-Kinase-TM          | Os10g0548300             | OsR498G101746000.01.T06   | E3 ubiquitin ligase                                                                        |
| augustus_masked-3-processed-gene-405.19-mRNA-1  | Japonica            | NA                    | CC-Kinase-TM          | Os03g0367800             | OsR498G030678500.01.T01   | Serine/threonine protein kinase blus1                                                      |
| augustus_masked-5-processed-gene-151.20-mRNA-1  | Japonica            | Japonica              | CC-Kinase-TM          | Os05g0317900             | OsR498G0510480600.01.T01  | Receptor-like protein kinase FERONIA                                                       |
| augustus_masked-5-processed-gene-168.18-mRNA-1  | Japonica            | NA                    | CC-Kinase-TM          | 0                        | 0                         | Receptor-like protein kinase FERONIA                                                       |
| augustus_masked-5-processed-gene-197.3-mRNA-1   | Japonica            | NA                    | CC-Kinase-TM          | Os05g0387600             | OsR498G0510577100.01.T01  | serine/threonine protein kinase-like protein At3g51990                                     |
| maker-1-augustus-gene-232.7-mRNA-1              | Japonica            | NA                    | CC-Kinase-TM          | Os10g0581400             | OsR498G101403700.01.T01   | Lycopene epsilon cyclase, Chloroplastic                                                    |
| maker-1-augustus-gene-307.56-mRNA-1             | Japonica            | Indica                | CC-Kinase-TM          | Os10g0758800             | OsR498G101528500.01.T01   | Protein kinase-like domain 'Cofactormer beta' subunit (COPB2), WD40 repeat, conserved site |
| maker-11-augustus-gene-22.57-mRNA-1             | Japonica            | NA                    | CC-Kinase-TM          | Os11g0160300             | OsR498G1119462200.01.T01  | Probable serine/threonine protein kinase WNK6                                              |
| maker-11-augustus-gene-244.53-mRNA-1            | Japonica            | Japonica              | CC-Kinase-TM          | Os11g0666200             | OsR498G1120691200.01.T01  | Protein kinase domain-containing protein                                                   |
| maker-11-augustus-gene-250.32-mRNA-1            | Japonica            | Indica                | CC-Kinase-TM          | Os12g0562500             | OsR498G1120719100.01.T01  | Serine/threonine protein kinase CRT1                                                       |
| maker-11-augustus-gene-52.53-mRNA-1             | Japonica            | NA                    | CC-Kinase-TM          | Os11g0274300             | OsR498G1119797800.01.T03  | Protein kinase domain containing protein, expressed                                        |
| maker-12-augustus-gene-97.8-mRNA-1              | Japonica            | Japonica              | CC-Kinase-TM          | Os12g0265900             | OsR498G1221251800.01.T01  | Wall-associated receptor kinase 2                                                          |
| maker-2-augustus-gene-216.1-mRNA-1              | Japonica            | NA                    | CC-Kinase-TM          | Os02g0559300             | OsR498G0204120100.01.T02  | Putative serine/threonine protein kinase                                                   |
| maker-2-augustus-gene-278.7-mRNA-1              | Japonica            | NA                    | CC-Kinase-TM          | 0                        | 0                         | E3 ubiquitin ligase                                                                        |
| maker-2-augustus-gene-278.7-mRNA-1              | Japonica            | NA                    | CC-Kinase-TM          | OsR498G0204478700.01.T01 | 0                         | E3 ubiquitin ligase                                                                        |
| maker-2-augustus-gene-319.34-mRNA-1             | Japonica            | Indica                | CC-Kinase-TM          | Os02g0743500             | OsR498G0204756500.01.T01  | Serine/threonine protein kinase CRT1                                                       |
| maker-2-augustus-gene-371.0-mRNA-1              | Japonica            | NA                    | CC-Kinase-TM          | Os02g0787200             | OsR498G0204950900.01.T01  | Serine/threonine protein kinase                                                            |
| maker-2-augustus-gene-373.1-mRNA-1              | Japonica            | Indica                | CC-Kinase-TM          | Os02g0791700             | OsR498G0204919500.01.T02  | Serine/threonine protein kinase BLUS1                                                      |
| maker-2-augustus-gene-47.47-mRNA-1              | Japonica            | Indica                | CC-Kinase-TM          | Os02g0218400             | OsR498G0203227800.01.T01  | E3 ubiquitin ligase                                                                        |
| maker-2-augustus-gene-67.58-mRNA-1              | Japonica            | NA                    | CC-Kinase-TM          | Os02g0218400             | OsR498G0203227700.01.T01  | U-box domain-containing protein 52                                                         |
| maker-3-augustus-gene-143.72-mRNA-1             | Japonica            | NA                    | CC-Kinase-TM          | Os10g0548700             | OsR498G1019141000.01.T03  | E3 ubiquitin ligase                                                                        |
| maker-3-augustus-gene-214.43-mRNA-1             | Japonica            | Japonica              | CC-Kinase-TM          | Os03g0424000             | OsR498G0306240800.01.T02  | E3 ubiquitin ligase                                                                        |
| maker-3-augustus-gene-446.22-mRNA-1             | Japonica            | NA                    | CC-Kinase-TM          | Os03g0749800             | OsR498G0307052200.01.T02  | Serine/threonine protein kinase TOUSLED                                                    |
| maker-3-augustus-gene-492.41-mRNA-1             | Japonica            | NA                    | CC-Kinase-TM          | Os03g0841100             | OsR498G0307348200.01.T01  | Wall-associated receptor kinase 3                                                          |
| maker-3-augustus-gene-57.74-mRNA-1              | Japonica            | NA                    | CC-Kinase-TM          | Os03g0289100             | OsR498G0305728500.01.T01  | Serine/threonine protein kinase CSK4                                                       |
| maker-4-augustus-gene-125.39-mRNA-1             | Japonica            | NA                    | CC-Kinase-TM          | 0                        | 0                         | Jacalin-like lectin domain containing protein                                              |
| maker-4-augustus-gene-277.10-mRNA-1             | Japonica            | Japonica              | CC-Kinase-TM          | Os04g0651500             | OsR498G0409395900.01.T01  | Wall-associated receptor kinase 3                                                          |
| maker-5-augustus-gene-152.30-mRNA-1             | Japonica            | Indica                | CC-Kinase-TM          | Os05g0318100             | OsR498G0510478100.01.T01  | Wall-associated receptor kinase-like protein 20                                            |
| maker-6-augustus-gene-165.11-mRNA-1             | Japonica            | NA                    | CC-Kinase-TM          | Os06g0484400             | OsR498G0612365700.01.T01  | Kinase superfamily protein isoform 1                                                       |
| maker-6-augustus-gene-47.64-mRNA-1              | Japonica            | Indica                | CC-Kinase-TM          | Os06g0781200             | OsR498G0615757800.01.T01  | U-box domain-containing protein 35-like isoform X2                                         |
| maker-7-augustus-gene-194.31-mRNA-1             | Japonica            | NA                    | CC-Kinase-TM          | Os07g0515100             | OsR498G0714421000.01.T03  | Calcium-dependent protein kinase                                                           |
| maker-7-augustus-gene-207.55-mRNA-1             | Japonica            | Indica                | CC-Kinase-TM          | Os07g0538400             | OsR498G0714507100.01.T01  | Cysteine-rich receptor-like protein kinase 6                                               |
| maker-8-augustus-gene-16.13-mRNA-1              | Japonica            | Indica                | CC-Kinase-TM          | Os08g0125800             | OsR498G0815100800.01.T01  | Putative receptor-type protein kinase LRK1                                                 |
| maker-8-augustus-gene-7.53-mRNA-1               | Japonica            | NA                    | CC-Kinase-TM          | Os08g0112500             | OsR498G0815061000.01.T02  | Putative serine/threonine protein kinase                                                   |
| maker-8-augustus-gene-83.40-mRNA-1              | Japonica            | NA                    | CC-Kinase-TM          | Os08g0236800             | 0                         | Non-specific serine/threonine protein kinase                                               |
| maker-8-augustus-gene-121.0-mRNA-1              | Japonica            | NA                    | CC-Kinase-TM          | Os09g0381300             | OsR498G0917329300.01.T03  | Allicin-activated protein kinase kinase NPK1                                               |
| maker-9-augustus-gene-165.57-mRNA-1             | Japonica            | NA                    | CC-Kinase-TM          | Os09g0442100             | OsR498G0917547800.01.T01  | Serine/threonine protein kinase RPK                                                        |
| maker-9-augustus-gene-166.8-mRNA-1              | Japonica            | NA                    | CC-Kinase-TM          | 0                        | 0                         | Serine/threonine protein kinase                                                            |
| maker-9-augustus-gene-224.23-mRNA-1             | Japonica            | NA                    | CC-Kinase-TM          | Os09g0561600             | OsR498G0917952300.01.T01  | Wall-associated receptor kinase 3                                                          |
| maker-9-augustus-gene-228.28-mRNA-1             | Japonica            | NA                    | CC-Kinase-TM          | Os09g0569800             | OsR498G0917973100.01.T01  | E3 ubiquitin ligase                                                                        |
| maker-9-augustus-gene-229.9-mRNA-1              | Japonica            | Indica                | CC-Kinase-TM          | Os09g0570000             | OsR498G0917973500.01.T05  | E3 ubiquitin ligase                                                                        |
| maker-9-augustus-gene-229.9-mRNA-1              | Japonica            | Indica                | CC-Kinase-TM          | Os09g0570100             | OsR498G0917973700.01.T02  | U-box domain-containing protein 33                                                         |
| augustus-8-processed-gene-86.28-mRNA-1          | NA                  | Japonica              | CC-Kinase-TM          | Os08g0230800             | OsR498G0815488100.01.T01  | Non-specific serine/threonine protein kinase                                               |
| augustus_masked-1-processed-gene-502.62-mRNA-1  | NA                  | NA                    | CC-Kinase-TM          | 0                        | 0                         | Non-specific serine/threonine protein kinase                                               |
| augustus_masked-11-processed-gene-244.4-mRNA-1  | NA                  | NA                    | CC-Kinase-TM          | 0                        | 0                         | L-type lectin domain-containing receptor kinase IX.1                                       |
| augustus_masked-4-processed-gene-127.3-mRNA-1   | NA                  | Indica                | CC-Kinase-TM          | Os04g0371700             | OsR498G0408350000.01.T01  | Wall-associated receptor kinase 3                                                          |
| augustus_masked-5-processed-gene-168.18-mRNA-1  | NA                  | NA                    | CC-Kinase-TM          | 0                        | 0                         | Receptor-like protein kinase FERONIA                                                       |
| maker-1-augustus-gene-500.4-mRNA-1              | NA                  | NA                    | CC-Kinase-TM          | Os01g0958000             | OsR498G0102734300.01.T01  | Cyclin-dependent kinase                                                                    |
| maker-10-augustus-gene-61.19-mRNA-1             | NA                  | NA                    | CC-Kinase-TM          | Os03g0251700             | OsR498G0305588100.01.T01  | Receptor-like serine/threonine protein kinase                                              |
| maker-11-augustus-gene-243.0-mRNA-1             | NA                  | NA                    | CC-Kinase-TM          | Os11g0664000             | OsR498G1120691000.01.T01  | Serine/threonine protein kinase (Fragment)                                                 |
| maker-11-augustus-gene-243.1-mRNA-1             | NA                  | Indica                | CC-Kinase-TM          | Os11g0664000             | OsR498G1120691200.01.T01  | Putative receptor-like protein kinase FERONIA (Fragment)                                   |
| maker-11-augustus-gene-247.0-mRNA-1             | NA                  | NA                    | CC-Kinase-TM          | 0                        | 0                         | S-receptor kinase-like protein 1-like                                                      |
| maker-11-augustus-gene-250.32-mRNA-1            | NA                  | NA                    | CC-Kinase-TM          | Os12g0562500             | OsR498G1120719100.01.T01  | Serine/threonine protein kinase CRT1                                                       |
| maker-2-augustus-gene-233.0-mRNA-1              | NA                  | Indica                | CC-Kinase-TM          | Os02g0591900             | OsR498G0204217300.01.T05  | Serine/threonine protein kinase                                                            |
| maker-2-augustus-gene-29.8-mRNA-1               | NA                  | NA                    | CC-Kinase-TM          | Os02g0152300             | OsR498G0202986300.01.T01  | Cyclophilin-like peptidyl-prolyl cis-trans isomerase family protein isoform 1              |
| maker-3-augustus-gene-117.71-mRNA-1             | NA                  | NA                    | CC-Kinase-TM          | Os03g0101200             | OsR498G0305069200.01.T01  | E3 ubiquitin ligase                                                                        |
| maker-3-augustus-gene-121.13-mRNA-1             | NA                  | NA                    | CC-Kinase-TM          | Os10g0561500             | OsR498G1019194900.01.T01  | E3 ubiquitin ligase                                                                        |
| maker-3-augustus-gene-134.63-mRNA-1             | NA                  | NA                    | CC-Kinase-TM          | Os06g0133800             | OsR498G06130519900.01.T01 | Serine/threonine protein kinase BSK1                                                       |
| maker-6-augustus-gene-21.9-mRNA-1               | NA                  | NA                    | CC-Kinase-TM          | Os06g0140800             | OsR498G0611602200.01.T02  | E3 ubiquitin ligase                                                                        |
| maker-6-augustus-gene-32.42-mRNA-1              | NA                  | NA                    | CC-Kinase-TM          | Os06g0163000             | OsR498G0611673200.01.T03  | E3 ubiquitin ligase                                                                        |
| maker-6-augustus-gene-70.35-mRNA-1              | NA                  | Indica                | CC-Kinase-TM          | Os06g0232100             | OsR498G0611940400.01.T04  | Serine/threonine protein kinase CRT1                                                       |
| maker-7-augustus-gene-194.31-mRNA-1             | NA                  | NA                    | CC-Kinase-TM          | Os07g0515100             | OsR498G0714421000.01.T03  | Calcium-dependent protein kinase                                                           |
| maker-8-augustus-gene-215.52-mRNA-1             | Indica              | NA                    | CC-Kinase-TM P133     | Os08g0421800             | OsR498G0816100400.01.T01  | Phenylalanine lyase resistance-330, P133 R gene                                            |
| maker-3-augustus-gene-127.7-mRNA-1              | Japonica            | CC-LRR                | CC-LRR                | Os06g012300              | OsR498G0612925500.01.T03  | Plant intracellular Ras-group-related LRR protein 5                                        |
| maker-4-augustus-gene-185.12-mRNA-1             | Japonica            | Indica                | CC-LRR                | Os04g0476700             | OsR498G0408763900.01.T01  | Plant intracellular Ras-group-related LRR protein 3                                        |
| maker-11-augustus-gene-228.6-mRNA-1             | Japonica            | NA                    | CC-LRR-NBS            | Os11g0604600             | OsR498G1120631300.01.T01  | Blast resistance protein P154 variant (Fragment)                                           |
| maker-9-augustus-gene-202.37-mRNA-1             | Japonica            | NA                    | CC-LRR-NBS            | OsR498G0917802800.01.T01 | 0                         | Pib variant protein (Fragment)                                                             |
| augustus-11-processed-gene-229.9-mRNA-1         | NA                  | NA                    | CC-LRR-NBS            | Os11g0604700             | OsR498G1120614900.01.T02  | Leucine Rich Repeat family protein, expressed                                              |
| augustus_masked-11-processed-gene-83.18-mRNA-1  | Indica              | NA                    | CC-LRR-NBS-TM         | 0                        | 0                         | NBS-LRR type protein (Fragment)                                                            |
| maker-10-augustus-gene-144.32-mRNA-1            | Indica              | NA                    | CC-LRR-NBS-TM         | Os04g0111900             | OsR498G0407452000.01.T01  | Putative NB-ARC domain-containing protein (Fragment)                                       |
| maker-11-augustus-gene-248.27-mRNA-1            | Indica              | NA                    | CC-LRR-NBS-TM         | Os11g0677101             | OsR498G1120709900.01.T01  | Putative nucleotide-binding leucine-rich-repeat protein 1                                  |
| maker-11-augustus-gene-83.3-mRNA-1              | Indica              | Japonica              | CC-LRR-NBS-TM         | Os11g0227100             | OsR498G1119648000.01.T02  | NBS-LRR type resistance protein (Fragment)                                                 |
| maker-8-augustus-gene-210.50-mRNA-1             | Indica              | NA                    | CC-LRR-NBS-TM         | OsR498G0816075400.01.T01 | 0                         | Disease resistance protein RPM1                                                            |
| maker-8-augustus-gene-53.54-mRNA-1              | Indica              | Japonica              | CC-LRR-NBS-TM         | Os08g0190300             | OsR498G0815343400.01.T01  | 0                                                                                          |
| augustus-11-processed-gene-190.33-mRNA-1        | Japonica            | Japonica              | CC-LRR-NBS-TM         | Os11g0515100             | OsR498G1120539900.01.T01  | Disease resistance protein RPM1                                                            |
| augustus-11-processed-gene-49.13-mRNA-1         | NA                  | NA                    | CC-LRR-NBS-TM         | Os11g0277000             | OsR498G1119789300.01.T01  | NB-ARC domain, putative                                                                    |
| augustus-12-processed-gene-182.13-mRNA-1        | Japonica            | Indica                | CC-LRR-NBS-TM         | Os12g0477100             | OsR498G1221588100.01.T01  | NB-ARC domain containing protein, expressed                                                |
| augustus-2-processed-gene-154.19-mRNA-1         | Japonica            | NA                    | CC-LRR-NBS-TM         | Os02g0456800             | OsR498G0203724300.01.T01  | Putative NB-ARC domain-containing protein (Fragment)                                       |
| augustus-2-processed-gene-51.36-mRNA-1          | Japonica            | Japonica              | CC-LRR-NBS-TM         | Os02g0191000             | OsR498G0203022300.01.T01  | Disease resistance protein RPM1                                                            |
| augustus-4-processed-gene-192.20-mRNA-1         | Japonica            | NA                    | CC-LRR-NBS-TM         | Os04g0491100             | OsR498G0408811900.01.T02  | Disease resistance RPP13-like protein 4                                                    |
| augustus_masked-11-processed-gene-219.12-mRNA-1 | Japonica            | NA                    | CC-LRR-NBS-TM         | Os11g0623800             | OsR498G1120528900.01.T02  | Putative nucleotide-binding leucine-rich-repeat protein 1                                  |
| augustus_masked-11-processed-gene-228.29-mRNA-1 | Japonica            | NA                    | CC-LRR-NBS-TM         | Os11g0640000             | OsR498G1120611600.01.T01  | Leucine Rich Repeat family protein, expressed                                              |
| augustus_masked-11-processed-gene-57.10-mRNA-1  | Japonica            | NA                    | CC-LRR-NBS-TM         | 0                        | 0                         | Putative nucleotide-binding leucine-rich-repeat protein 1                                  |
| augustus_masked-11-processed-gene-83.18-mRNA-1  | Japonica            | NA                    | CC-LRR-NBS-TM         | 0                        | 0                         | NBS-LRR type protein (Fragment)                                                            |
| augustus_masked-3-processed-gene-148.50-mRNA-1  | Japonica            | NA                    | CC-LRR-NBS-TM         | Os03g0324600             | OsR498G0305854800.01.T01  | NB-ARC domain containing protein, expressed                                                |
| augustus_masked-5-processed-gene-253.1-mRNA-1   | Japonica            | NA                    | CC-LRR-NBS-TM         | 0                        | 0                         | NBS-LRR type resistance protein (Fragment)                                                 |
| augustus_masked-5-processed-gene-253.10-mRNA-1  | Japonica            | Japonica              | CC-LRR-NBS-TM         | Os05g0492400             | OsR498G0511090900.01.T01  | NBS-LRR type resistance protein (Fragment)                                                 |
| maker-1-augustus-gene-133.42-mRNA-1             | Japonica            | NA                    | CC-LRR-NBS-TM         | Os10g0335700             | OsR498G100857600.01.T01   | Putative NB-ARC domain-containing protein (Fragment)                                       |
| maker-10-augustus-gene-167.5-mRNA-1             | Japonica            | NA                    | CC-LRR-NBS-TM         | Os10g0474500             | OsR498G1018892300.01.T01  | Putative disease resistance protein RGA3                                                   |
| maker-11-augustus-gene-199.40-mRNA-1            | Japonica            | Indica                | CC-LRR-NBS-TM         | Os11g0509000             | OsR498G1120403700.01.T02  | Putative CC-NBS-LRR resistance protein MLA13                                               |
| maker-11-augustus-gene-248.27-mRNA-1            | Japonica            | NA                    | CC-LRR-NBS-TM         | Os11g0677101             | OsR498G1120709900.01.T01  | Putative nucleotide-binding leucine-rich-repeat protein 1                                  |
| maker-11-augustus-gene-55.8-mRNA-1              | Japonica            | Japonica              | CC-LRR-NBS-TM         | Os11g0235800             | OsR498G1119734000.01.T01  | NB-ARC domain, putative                                                                    |
| maker-11-augustus-gene-83.3-mRNA-1              | Japonica            | Japonica              | CC-LRR-NBS-TM         | Os11g0227100             | OsR498G1119648000.01.T02  | NBS-LRR type resistance protein (Fragment)                                                 |
| maker-11-augustus-gene-87.36-mRNA-1             | Japonica            | NA                    | CC-LRR-NBS-TM         | Os11g0237900             | OsR498G1119671300.01.T01  | Putative disease resistance RPP13-like protein 3                                           |
| maker-12-augustus-gene-235.0-mRNA-1             | Japonica            | NA                    | CC-LRR-NBS-TM         | Os12g0565200             | OsR498G1221893900.01.T01  | NB-ARC domain containing protein, expressed                                                |
| maker-3-augustus-gene-100.35-mRNA-1             | Japonica            | Indica                | CC-LRR-NBS-TM         | Os02g0272900             | OsR498G0203396700.01.T01  | AAA domain-containing protein                                                              |
| maker-2-augustus-gene-115.5-mRNA-1              | Japonica            | NA                    | CC-LRR-NBS-TM         | 0                        | 0</                       |                                                                                            |

|                                                 |          |           |               |               |                            |                                                                                         |
|-------------------------------------------------|----------|-----------|---------------|---------------|----------------------------|-----------------------------------------------------------------------------------------|
| maker-8-augustus-gene-53.54-mRNA-1              | NA       | Japonica  | CC-LRR-NBS-TM | Os08g0190300  | OsR498G0815343400.01.T01   |                                                                                         |
| maker-8-augustus-gene-284.4-mRNA-1              | Japonica | NA        | CC-LRR-NBS-TM | Os08g0539700  | OsR498G0816548900.01.T01   | Brown planthopper resistance protein BPH1/9 (PIB48)                                     |
| maker-2-augustus-gene-391.32-mRNA-1             | Japonica | NA        | CC-LRR-TM     | Os02g0546600  | OsR498G0205039000.01.T01   | Plant intracellular Ras-group-related LRR protein 9                                     |
| augustus-12-processed-gene-68.17-mRNA-1         | NA       | Japonica  | CC-LRR-TM     | Os12g0229200  | OsR498G1221134900.01.T01   | Lucine Rich Repeat family protein, expressed                                            |
| augustus-11-processed-gene-204.32-mRNA-1        | Japonica | Japonica  | CC-NBS        | Os11g0598500  | OsR498G1120448400.01.T01   | Lucine Rich Repeat family protein, expressed                                            |
| augustus_masked-10-processed-gene-18.40-mRNA-1  | Japonica | Japonica  | CC-NBS        | Os10g0124300  | OsR498G1018071200.01.T02   | Disease resistance protein RPPM1                                                        |
| augustus_masked-11-processed-gene-245.11-mRNA-1 | Japonica | NA        | CC-NBS        | Os11g0668000  | OsR498G1120693800.01.T01   | Putative NBS-LRR class RGA                                                              |
| maker-2-augustus-gene-215.4-mRNA-1              | Japonica | NA        | CC-NBS        |               | OsR498G020486500.01.T01    |                                                                                         |
| maker-8-augustus-gene-72.8-mRNA-1               | Japonica | NA        | CC-NBS        |               | OsR498G0815537800.01.T03   | Disease resistance protein RPP13                                                        |
| maker-4-augustus-gene-85.2-mRNA-1               | NA       | NA        | CC-NBS        | 0             | OsR498G0408112900.01.T01   | Putative NBS-LRR class RGA                                                              |
| maker-8-augustus-gene-92.8-mRNA-1               | NA       | NA        | CC-NBS        | 0             | OsR498G0815527800.01.T03   | Disease resistance protein RPP13                                                        |
| augustus-11-processed-gene-252.13-mRNA-1        | Indica   | NA        | CC-NBS-TM     | Os10g0684200  | OsR498G1120731300.01.T01   | NB-ARC domain containing protein, expressed                                             |
| augustus-7-processed-gene-198.23-mRNA-1         | Indica   | NA        | CC-NBS-TM     | Os07g0521800  | OsR498G0714451300.01.T01   | Putative resistance complex protein I2C-2                                               |
| augustus_masked-4-processed-gene-29.12-mRNA-1   | Indica   | Japonica  | CC-NBS-TM     | Os04g0219600  | OsR498G1119454400.01.T01   | NBS-LRR type protein (Fragment)                                                         |
| augustus_masked-5-processed-gene-213.32-mRNA-1  | Indica   | NA        | CC-NBS-TM     |               | OsR498G0510842500.01.T01   | Putative disease resistance RPP13-like protein 1                                        |
| augustus_masked-8-processed-gene-33.2-mRNA-1    | Indica   | NA        | CC-NBS-TM     |               | OsR498G0815208900.01.T01   | NB-ARC domain containing protein, expressed                                             |
| maker-1-augustus-gene-94.39-mRNA-1              | Indica   | NA        | CC-NBS-TM     | Os10g0269500  | OsR498G0100629900.01.T03   | Putative NBS type P protein                                                             |
| maker-11-augustus-gene-149.39-mRNA-1            | Indica   | NA        | CC-NBS-TM     |               |                            | Putative NBS-LRR type disease resistance protein                                        |
| maker-4-augustus-gene-86.32-mRNA-1              | Indica   | NA        | CC-NBS-TM     |               | OsR498G0408112900.01.T01   | Putative NBS-LRR class RGA                                                              |
| maker-6-augustus-gene-102.41-mRNA-1             | Indica   | NA        | CC-NBS-TM     |               |                            |                                                                                         |
| augustus-11-processed-gene-235.26-mRNA-1        | Japonica | NA        | CC-NBS-TM     | Os11g0652100  | OsR498G1120654000.01.T01   | Disease resistance protein RPPM1                                                        |
| augustus-11-processed-gene-237.18-mRNA-1        | Japonica | NA        | CC-NBS-TM     | Os11g0655300  | OsR498G1120667300.01.T01   | NB-ARC domain containing protein, expressed                                             |
| augustus-12-processed-gene-57.3-mRNA-1          | Japonica | NA        | CC-NBS-TM     | Os12g0204700  | OsR498G1221079900.01.T01   | NB-ARC domain containing protein, expressed                                             |
| augustus-4-processed-gene-182.0-mRNA-1          | Japonica | Japonica  | CC-NBS-TM     | Os04g0470500  | OsR498G0408741100.01.T01   | Disease resistance protein RPS2                                                         |
| augustus-4-processed-gene-262.14-mRNA-1         | Japonica | Japonica  | CC-NBS-TM     | Os04g0621750  | OsR498G04097301900.01.T01  | Disease resistance protein RGA2                                                         |
| augustus-9-processed-gene-284.21-mRNA-1         | Japonica | NA        | CC-NBS-TM     | Os08g0545100  |                            | Putative NBS-LRR resistance protein RGH1                                                |
| augustus_masked-1-processed-gene-341.24-mRNA-1  | Japonica | NA        | CC-NBS-TM     | Os10g0788500  | OsR498G102125800.01.T03    | Disease resistance protein RPS2                                                         |
| augustus_masked-1-processed-gene-488.23-mRNA-1  | Japonica | Japonica  | CC-NBS-TM     | Os01g0937300  | OsR498G0102662000.01.T03   | Disease resistance protein RGA2                                                         |
| augustus_masked-10-processed-gene-144.26-mRNA-1 | Japonica | NA        | CC-NBS-TM     |               |                            | NBS-LRR resistant protein (Fragment)                                                    |
| augustus_masked-11-processed-gene-203.21-mRNA-1 | Japonica | NA        | CC-NBS-TM     | Os11g0598300  | OsR498G1120448400.01.T01   | Lucine Rich Repeat family protein, expressed                                            |
| augustus_masked-11-processed-gene-211.3-mRNA-1  | Japonica | NA        | CC-NBS-TM     | Os11g0697700  | OsR498G1120489600.01.T01   | Disease resistance protein RPPM1                                                        |
| augustus_masked-11-processed-gene-234.22-mRNA-1 | Japonica | NA        | CC-NBS-TM     | Os11g0655300  |                            | NBS-LRR type resistance protein-like                                                    |
| augustus_masked-11-processed-gene-237.27-mRNA-1 | Japonica | NA        | CC-NBS-TM     | Os11g0654800  | OsR498G1120665400.01.T01   | Disease resistance protein RPPM1                                                        |
| augustus_masked-11-processed-gene-239.33-mRNA-1 | Japonica | NA        | CC-NBS-TM     |               | OsR498G1120676400.01.T02   | Putative disease resistance RPP8-like protein 2                                         |
| augustus_masked-11-processed-gene-82.26-mRNA-1  | Japonica | Indica    | CC-NBS-TM     | Os11g0226933  | OsR498G1119644200.01.T01   | NBS-LRR type protein (Fragment)                                                         |
| augustus_masked-12-processed-gene-100.23-mRNA-1 | Japonica | NA        | CC-NBS-TM     |               |                            | NBS-LRR type disease resistance protein, putative                                       |
| augustus_masked-12-processed-gene-102.18-mRNA-1 | Japonica | NA        | CC-NBS-TM     | Os12g0273000  | OsR498G1221277200.01.T02   | Disease resistance protein RPPM1                                                        |
| augustus_masked-12-processed-gene-50.21-mRNA-1  | Japonica | NA        | CC-NBS-TM     |               | OsR498G1221076200.01.T01   | Disease resistance protein RPPM1                                                        |
| augustus_masked-12-processed-gene-59.18-mRNA-1  | Japonica | NA        | CC-NBS-TM     |               |                            | Disease resistance protein RGA2                                                         |
| augustus_masked-6-processed-gene-234.17-mRNA-1  | Japonica | Japonica  | CC-NBS-TM     | Os06g0594200  | OsR498G0612874800.01.T01   | Putative disease resistance RPP13-like protein 1                                        |
| augustus_masked-8-processed-gene-4.18-mRNA-1    | Japonica | Japonica  | CC-NBS-TM     | Os08g0107000  | OsR498G0815041300.01.T01   | Disease resistance protein RPP13                                                        |
| maker-1-augustus-gene-147.35-mRNA-1             | Japonica | NA        | CC-NBS-TM     |               | OsR498G100948800.01.T01    | Powdery mildew resistance protein PM3 variant                                           |
| maker-1-augustus-gene-192.35-mRNA-1             | Japonica | NA        | CC-NBS-TM     | Os11g0552900  | OsR498G0101314400.01.T02   | Slight resistance protein RGA1-like protein                                             |
| maker-1-augustus-gene-482.51-mRNA-1             | Japonica | NA        | CC-NBS-TM     |               | OsR498G0102617400.01.T01   | Disease resistance protein RPP13                                                        |
| maker-1-augustus-gene-488.70-mRNA-1             | Japonica | NA        | CC-NBS-TM     | Os01g0937400  | OsR498G0102663200.01.T06   | Disease resistance protein RGA2                                                         |
| maker-10-augustus-gene-139.30-mRNA-1            | Japonica | NA        | CC-NBS-TM     | Os12g0246700  | OsR498G0407486900.01.T01   | NB-ARC domain containing protein, expressed                                             |
| maker-10-augustus-gene-222.27-mRNA-1            | Japonica | NA        | CC-NBS-TM     | Os10g0131901  | OsR498G1018095000.01.T01   | Disease resistance protein Plm2-T5                                                      |
| maker-10-augustus-gene-234-mRNA-1               | Indica   | NA        | CC-NBS-TM     | Os08g03108100 | OsR498G0810181100.01.T01   | Disease resistance protein RPPM1                                                        |
| maker-11-augustus-gene-142.46-mRNA-1            | Japonica | NA        | CC-NBS-TM     | Os11g0479100  | OsR498G1120143800.01.T02   | NB-ARC domain, putative                                                                 |
| maker-11-augustus-gene-149.40-mRNA-1            | Japonica | NA        | CC-NBS-TM     | Os11g0493700  |                            | NB-ARC domain containing protein, expressed                                             |
| maker-11-augustus-gene-150.0-mRNA-1             | Japonica | NA        | CC-NBS-TM     |               | OsR498G1120176700.01.T01   | NBS-LRR type resistance protein (Fragment)                                              |
| maker-11-augustus-gene-150.2-mRNA-1             | Japonica | NA        | CC-NBS-TM     | Os11g0495032  |                            | NB-ARC domain containing protein, expressed                                             |
| maker-11-augustus-gene-165.14-mRNA-1            | Japonica | NA        | CC-NBS-TM     |               | OsR498G1120249800.01.T02   | NBS-LRR-like resistance protein (Fragment)                                              |
| maker-11-augustus-gene-180.2-mRNA-1             | Japonica | NA        | CC-NBS-TM     |               | Os11g0551700               | Disease resistance protein RPPM1                                                        |
| maker-11-augustus-gene-181.30-mRNA-1            | Japonica | NA        | CC-NBS-TM     |               |                            | Rust resistance protein RPP1-D homolog                                                  |
| maker-11-augustus-gene-199.35-mRNA-1            | Japonica | Japonica  | CC-NBS-TM     | Os11g0590700  | OsR498G1120430700.01.T02   | Putative CC-NBS-LRR resistance protein MLA13                                            |
| maker-11-augustus-gene-199.37-mRNA-1            | Japonica | NA        | CC-NBS-TM     | Os11g0590900  | OsR498G1120430300.01.T01   | NB-ARC domain containing protein, expressed                                             |
| maker-11-augustus-gene-222.39-mRNA-1            | Japonica | NA        | CC-NBS-TM     |               | OsR498G1120562500.01.T05   | Disease resistance protein RPPM1                                                        |
| maker-11-augustus-gene-260.0-mRNA-1             | Japonica | Japonica  | CC-NBS-TM     | Os11g0699100  | OsR498G1120573300.01.T01   | Disease resistance protein RPP13                                                        |
| maker-11-augustus-gene-42.0-mRNA-1              | NA       | NA        | CC-NBS-TM     |               |                            | NB-ARC domain, putative                                                                 |
| maker-11-augustus-gene-61.35-mRNA-1             | Japonica | Japonica  | CC-NBS-TM     | Os11g0249000  | OsR498G1119714500.01.T01   | Disease resistance protein RPPM1                                                        |
| maker-11-augustus-gene-75.20-mRNA-1             | Japonica | NA        | CC-NBS-TM     | Os11g0213800  | OsR498G1119615600.01.T05   | NBS-LRR type protein (Fragment)                                                         |
| maker-11-augustus-gene-82.6-mRNA-1              | Japonica | Indica    | CC-NBS-TM     | Os11g0226700  | OsR498G1119646100.01.T02   | NBS-LRR type protein (Fragment)                                                         |
| maker-11-augustus-gene-82.8-mRNA-1              | Japonica | NA        | CC-NBS-TM     |               |                            | Protein kinase domain-containing protein                                                |
| maker-12-augustus-gene-102.0-mRNA-1             | Japonica | Japonica  | CC-NBS-TM     | Os12g0273266  | OsR498G1221272600.01.T01   | Disease resistance protein RPPM1, putative, expressed                                   |
| maker-12-augustus-gene-102.3-mRNA-1             | Japonica | NA        | CC-NBS-TM     |               |                            | NB-ARC domain containing protein, expressed                                             |
| maker-12-augustus-gene-189.12-mRNA-1            | Japonica | Japonica  | CC-NBS-TM     | Os12g0485900  | OsR498G1221625000.01.T01   | NB-ARC domain, putative                                                                 |
| maker-12-augustus-gene-196.0-mRNA-1             | Japonica | NA        | CC-NBS-TM     | Os12g0495600  | OsR498G1221658200.01.T01   | Putative CC-NBS-LRR resistance protein MLA13                                            |
| maker-12-augustus-gene-206.31-mRNA-1            | Japonica | NA        | CC-NBS-TM     |               | OsR498G1221703800.01.T01   | NB-ARC domain containing protein, expressed                                             |
| maker-12-augustus-gene-206.34-mRNA-1            | Japonica | Indica    | CC-NBS-TM     | Os12g0511400  | OsR498G1221704000.01.T02   | NB-ARC domain containing protein, expressed                                             |
| maker-12-augustus-gene-231.39-mRNA-1            | Japonica | NA        | CC-NBS-TM     | Os12g0529500  | OsR498G1221874800.01.T01   | Disease resistance protein RPP13                                                        |
| maker-12-augustus-gene-234.75-mRNA-1            | Japonica | CC-NBS-TM | CC-NBS-TM     | Os12g0555100  | OsR498G1221893300.01.T01   | NB-ARC domain containing protein, expressed                                             |
| maker-12-augustus-gene-53.41-mRNA-1             | Japonica | Indica    | CC-NBS-TM     | Os09g0517200  | OsR498G1221092300.01.T02   | Disease resistance protein RPPM1                                                        |
| maker-2-augustus-gene-105.32-mRNA-1             | Japonica | Japonica  | CC-NBS-TM     | Os02g0281800  | OsR498G0203420100.01.T02   | Disease resistance protein RGA2                                                         |
| maker-2-augustus-gene-117.50-mRNA-1             | Japonica | NA        | CC-NBS-TM     |               | OsR498G0203501200.01.T03   | LZ-NBS-LRR class RGA                                                                    |
| maker-2-augustus-gene-130.6-mRNA-1              | Japonica | NA        | CC-NBS-TM     | Os02g0325100  | OsR498G0203583700.01.T01   | 26S proteasome regulatory subunit 68 homolog                                            |
| maker-2-augustus-gene-182.38-mRNA-1             | Japonica | NA        | CC-NBS-TM     |               | OsR498G0203882300.01.T01   | CC-NBS-LRR type disease resistance protein NL2-V-2                                      |
| maker-2-augustus-gene-216.0-mRNA-1              | Japonica | NA        | CC-NBS-TM     |               | OsR498G0204117300.01.T01   | Disease resistance protein RPPM1                                                        |
| maker-2-augustus-gene-58.42-mRNA-1              | Japonica | NA        | CC-NBS-TM     | Os02g0203500  | OsR498G0203179000.01.T01   | NB-ARC domain-containing protein (Fragment)                                             |
| maker-3-augustus-gene-106.29-mRNA-1             | Japonica | NA        | CC-NBS-TM     | Os03g0306400  | OsR498G0305788600.01.T02   | Pon protease, mitochondrial                                                             |
| maker-3-augustus-gene-285.44-mRNA-1             | Japonica | NA        | CC-NBS-TM     |               | OsR498G0203583700.01.T01   | Putative disease resistance protein RGA3                                                |
| maker-3-augustus-gene-495.19-mRNA-1             | Japonica | Indica    | CC-NBS-TM     | Os03g0489700  | OsR498G0307368200.01.T01   | Powdery mildew resistance protein PM3 variant                                           |
| maker-3-augustus-gene-85.63-mRNA-1              | Japonica | Indica    | CC-NBS-TM     | Os03g0244800  | OsR498G0305631400.01.T02   | AAA domain-containing protein (Fragment)                                                |
| maker-4-augustus-gene-244.7-mRNA-1              | Japonica | NA        | CC-NBS-TM     |               | OsR498G0409181900.01.T01   | Multidrug resistance-associated protein/mitoxantone resistance protein, ABC superfamily |
| maker-4-augustus-gene-262.49-mRNA-1             | Japonica | NA        | CC-NBS-TM     |               |                            | Disease resistance protein RGA2                                                         |
| maker-4-augustus-gene-102.41-mRNA-1             | Japonica | NA        | CC-NBS-TM     |               |                            | NBS-LRR                                                                                 |
| maker-7-augustus-gene-173.0-mRNA-1              | Japonica | NA        | CC-NBS-TM     |               | OsR498G0714309200.01.T01   | Putative NB-ARC domain-containing protein (Fragment)                                    |
| maker-8-augustus-gene-123.5-mRNA-1              | Japonica | NA        | CC-NBS-TM     | Os08g0293300  | OsR498G0815678400.01.T02   | Disease resistance protein RPPM1                                                        |
| maker-8-augustus-gene-284.17-mRNA-1             | Japonica | Japonica  | CC-NBS-TM     | Os08g0539400  | OsR498G0816548800.01.T01   | Resistance protein RGA2                                                                 |
| maker-8-augustus-gene-45.38-mRNA-1              | Japonica | NA        | CC-NBS-TM     |               | OsR498G0815299900.01.T02   | Putative CC-NBS-LRR resistance protein MLA13                                            |
| maker-8-augustus-gene-63.0-mRNA-1               | Japonica | Japonica  | CC-NBS-TM     | Os08g0205100  | OsR498G0815390700.01.T01   | CC-NBS-LRR type disease resistance protein NL1-V                                        |
| maker-8-augustus-gene-63.1-mRNA-1               | Japonica | NA        | CC-NBS-TM     | Os08g0205150  | OsR498G0815390700.01.T02   | CC-NBS-LRR type disease resistance protein NL1-V                                        |
| maker-9-augustus-gene-185.54-mRNA-1             | Japonica | Indica    | CC-NBS-TM     | Os08g0479500  | OsR498G081971691400.01.T01 | Disease resistance protein RPPM1                                                        |
| maker-9-augustus-gene-202.41-mRNA-1             | Japonica | NA        | CC-NBS-TM     | Os07g0517200  | OsR498G0717803000.01.T01   | NB-ARC domain-containing protein (Fragment)                                             |
| maker-9-augustus-gene-57.0-mRNA-1               | Japonica | NA        | CC-NBS-TM     | Os09g0270700  | OsR498G0916882900.01.T01   | Disease resistance protein RPPM1                                                        |
| augustus-11-processed-gene-194.0-mRNA-1         | NA       | NA        | CC-NBS-TM     | Os11g0598300  | OsR498G1120448400.01.T01   | Lucine Rich Repeat family protein, expressed                                            |
| augustus-12-processed-gene-53.32-mRNA-1         | NA       | NA        | CC-NBS-TM     | Os12g0199100  |                            | Putative NB-ARC domain-containing protein (Fragment)                                    |
| augustus-2-processed-gene-10.1-mRNA-1           | NA       | NA        | CC-NBS-TM     |               |                            | Truncated S21                                                                           |
| augustus-2-processed-gene-56.51-mRNA-1          | NA       | NA        | CC-NBS-TM     | 0             | OsR498G0203162900.01.T01   | NB-ARC domain-containing protein                                                        |
| augustus-4-processed-gene-182.0-mRNA-1          | NA       | Japonica  | CC-NBS-TM     | Os04g0470500  | OsR498G0408741100.01.T01   | Disease resistance protein RPS2                                                         |
| augustus-4-processed-gene-84.19-mRNA-1          | NA       | Japonica  | CC-NBS-TM     | Os04g0312000  | OsR498G0612066600.01.T01   | Protein kinase domain-containing protein                                                |
| augustus_masked-10-processed-gene-144.26-mRNA-1 | NA       | NA        | CC-NBS-TM     |               |                            | NBS-LRR resistant protein (Fragment)                                                    |
| augustus_masked-11-processed-gene-203.21-mRNA-1 | NA       | NA        | CC-NBS-TM     | Os11g0598300  | OsR498G1120448400.01.T01   | Lucine Rich Repeat family protein, expressed                                            |
| augustus_masked-11-processed-gene-211.3-mRNA-1  | NA       | NA        | CC-NBS-TM     | Os11g0669700  | OsR498G1120489600.01.T01   | Disease resistance protein RPPM1                                                        |
| augustus_masked-11-processed-gene-234.22-mRNA-1 | NA       | NA        | CC-NBS-TM     | Os11g02213800 | OsR498G1119611200.01.T01   | NBS-LRR type protein (Fragment)                                                         |
| augustus-11-processed-gene-231.21-mRNA-1        | Japonica | Indica    | NBS-LRR       | Os11g0644700  | OsR498G1120631700.01.T01   | Disease Resistance protein Pi2 (allele at the P1k locus)                                |
| maker-6-augustus-gene-105.9-mRNA-1              | Japonica | NA        |               | Os06g0294300  | OsR498G0612179200.01.T01   | Disease Resistance protein Pi2                                                          |
| augustus_masked-12-processed-gene-276.25-mRNA-1 | NA       | NA        | CC-NBS-TM     | Os07g0105900  |                            | NB-ARC domain-containing protein                                                        |
| augustus_masked-8-processed-gene-101.5-mRNA-1   | NA       | NA        | CC-NBS-TM     | Os08g0261000  | OsR498G0815572500.01.T03   | NBS type RGA protein (Fragment)                                                         |
| augustus_masked-9-processed-gene-86.16-mRNA-1   | NA       | NA        | CC-NBS-TM     | Os09g0308500  | OsR498G0912792900.01.T01   | Putative nucleotide-binding leucine-rich-repeat protein 1                               |
| maker-1-augustus-gene-247.25-mRNA-1             | NA       | NA        | CC-NBS-TM     | 0             |                            | AAA domain-containing protein                                                           |
| maker-1-augustus-gene-411.31-mRNA-1             | NA       | NA        | CC-NBS-TM     | 0             | OsR498G1120729200.01.T01   | AAA domain-containing protein                                                           |
| maker-1-augustus-gene-462.16-mRNA-1             | NA       | NA        | CC-NBS-TM     | 0             | OsR498G1120729200.01.T01   | AAA domain-containing protein                                                           |
| maker-1-augustus-gene-94.39-mRNA-1              | NA       | NA        | CC-NBS-TM     | Os10g0269500  | OsR498G0100629900.01.T03   | Putative NBS type P protein                                                             |
| maker-1-augustus-gene-94.49-mRNA-1              | NA       | NA        | CC-NBS-TM     | Os10g0269800  | OsR498G0100631100.01.T01   | NBS-LRR type disease resistance protein-like                                            |
| maker-10-augustus-gene-149.39-mRNA-1            | NA       | Indica    | CC-NBS-TM     | Os10g0269800  | OsR498G0100631100.01.T01   | Putative NB-ARC domain-containing protein (Fragment)                                    |
| maker-10-augustus-gene-139.30-mRNA-1            | NA       | NA        | CC-NBS-TM     | Os12g0246700  | OsR498G0407486900.01.T01   | NB-ARC domain containing protein, expressed                                             |
| maker-11-augustus-gene-149.39-mRNA-1            | NA       | NA        | CC-NBS-TM     |               |                            | Putative NBS-LRR type disease resistance protein                                        |
| maker-11-augustus-gene-165.14-mRNA-1            | NA       | NA        | CC-NBS-TM     | 0             | OsR498G1120249800.01.T02   | NBS-LRR-like resistance protein (Fragment)                                              |
| maker-11-augustus-gene-232.0-mRNA-1             | NA       | NA        | CC-NBS-TM     | Os11g0646300  |                            | Lucine Rich Repeat family protein, expressed                                            |
| maker-11-augustus-gene-232.0-mRNA-1             | NA       | Japonica  | CC-NBS-TM     | Os11g0669100  | OsR498G1120573300.01.T01   | Disease resistance protein RPP13                                                        |
| maker-11-augustus-gene-80.36-mRNA-1             | NA       | NA        | CC-NBS-TM     | Os11g0223900  |                            | Putative NB-ARC domain-containing protein (Fragment)                                    |
| maker-12-augustus-gene-175.32-mRNA-1            | NA       | NA        | CC-NBS-TM     | Os12g047300   |                            | NB-ARC domain containing protein, expressed                                             |
| maker-12-augustus-gene-206.34-mRNA-1            | NA       | Indica    | CC-NBS-TM     | Os12g0511400  | OsR498G1221704000.01.T02   | NB-ARC domain containing protein, expressed                                             |
| maker-                                          |          |           |               |               |                            |                                                                                         |

|                                                 |        |        |               |                          |                                                                        |                                                                            |
|-------------------------------------------------|--------|--------|---------------|--------------------------|------------------------------------------------------------------------|----------------------------------------------------------------------------|
| augustus-8-processed-gene-231.5-mRNA-1          | Indica | NA     | Kinase-LRR-TM | Os08g0446200             | OsR498G0816198200.01.T01                                               | Leucine-rich repeat receptor-like protein kinase PEPR1                     |
| augustus-9-processed-gene-141.32-mRNA-1         | Indica | NA     | Kinase-LRR-TM | Os09g0405500             | OsR498G0917406000.01.T01                                               | Atypical receptor-like kinase MARK                                         |
| maker-1-augustus-gene-18.7-mRNA-1               | Indica | NA     | Kinase-LRR-TM | Os01g0133900             | OsR498G010117900.01.T01                                                | Probable leucine-rich repeat receptor-like protein kinase At1g68400        |
| maker-1-augustus-gene-27.62-mRNA-1              | Indica | NA     | Kinase-LRR-TM | Os01g0149700             | OsR498G0100178400.01.T01                                               | Putative LRR receptor-like serine/threonine-protein kinase                 |
| maker-1-augustus-gene-351.20-mRNA-1             | Indica | Indica | Kinase-LRR-TM | Os01g0810533             | OsR498G0102188400.01.T04                                               | Receptor-like protein kinase                                               |
| maker-1-augustus-gene-352.53-mRNA-1             | Indica | NA     | Kinase-LRR-TM | OsR498G0102191000.01.T01 | Putative light repressible receptor protein kinase                     |                                                                            |
| maker-1-augustus-gene-352.59-mRNA-1             | Indica | NA     | Kinase-LRR-TM | OsR498G0102192000.01.T04 | Putative light repressible receptor protein kinase                     |                                                                            |
| maker-1-augustus-gene-355.0-mRNA-1              | Indica | NA     | Kinase-LRR-TM | OsR498G0102217000.01.T01 | Leucine-rich repeat protein kinase family protein                      |                                                                            |
| maker-1-augustus-gene-354.16-mRNA-1             | Indica | Indica | Kinase-LRR-TM | OsR498G0102218900.01.T03 | Inactive receptor kinase                                               |                                                                            |
| maker-1-augustus-gene-356.23-mRNA-1             | Indica | NA     | Kinase-LRR-TM | OsR498G0102217000.01.T01 | Non-specific serine/threonine protein kinase (Fragment)                |                                                                            |
| maker-1-augustus-gene-358.18-mRNA-1             | Indica | Indica | Kinase-LRR-TM | OsR498G0102320200.01.T01 | Serine/threonine kinase                                                |                                                                            |
| maker-1-augustus-gene-36.36-mRNA-1              | Indica | Indica | Kinase-LRR-TM | OsR498G0100236300.01.T02 | Mitogen-activated protein kinase kinase kinase                         |                                                                            |
| maker-10-augustus-gene-163.28-mRNA-1            | Indica | Indica | Kinase-LRR-TM | OsR498G0108870200.01.T01 | Receptor protein kinase                                                |                                                                            |
| maker-10-augustus-gene-37.42-mRNA-1             | Indica | Indica | Kinase-LRR-TM | OsR498G0108870200.01.T01 | Leucine-rich repeat receptor-like protein kinase PEPR1                 |                                                                            |
| maker-11-augustus-gene-123.41-mRNA-1            | Indica | Indica | Kinase-LRR-TM | OsR498G1120059500.01.T01 | Receptor-like kinase TMK4 isoform A                                    |                                                                            |
| maker-2-augustus-gene-30.20-mRNA-1              | Indica | Indica | Kinase-LRR-TM | OsR498G0202991600.01.T01 | Putative leucine-rich repeat receptor-like kinase                      |                                                                            |
| maker-2-augustus-gene-41.14-mRNA-1              | Indica | NA     | Kinase-LRR-TM | OsR498G0203068900.01.T01 | Pollen receptor-like kinase                                            |                                                                            |
| maker-3-augustus-gene-197.33-mRNA-1             | Indica | Indica | Kinase-LRR-TM | OsR498G0306114400.01.T02 | Protein STRUBELLIG-RECEPTOR FAMILY 6                                   |                                                                            |
| maker-3-augustus-gene-298.46-mRNA-1             | Indica | NA     | Kinase-LRR-TM | OsR498G0108547400.01.T03 | Putative receptor-like protein kinase                                  |                                                                            |
| maker-3-augustus-gene-299.43-mRNA-1             | Indica | NA     | Kinase-LRR-TM | OsR498G0108579900.01.T01 | LRR receptor-like serine/threonine-protein kinase EFR isoform B        |                                                                            |
| maker-3-augustus-gene-307.8-mRNA-1              | Indica | NA     | Kinase-LRR-TM | OsR498G0108534900.01.T01 | Putative LRR receptor-like serine/threonine-protein kinase             |                                                                            |
| maker-5-augustus-gene-214.40-mRNA-1             | Indica | NA     | Kinase-LRR-TM | OsR498G0510843600.01.T02 | Serine/threonine protein kinase                                        |                                                                            |
| maker-5-augustus-gene-247.14-mRNA-1             | Indica | NA     | Kinase-LRR-TM | OsR498G0511055300.01.T09 | Putative LRR receptor-like serine/threonine-protein kinase-like        |                                                                            |
| maker-5-augustus-gene-247.29-mRNA-1             | Indica | NA     | Kinase-LRR-TM | OsR498G0511051800.01.T01 | Putative inactive receptor kinase                                      |                                                                            |
| maker-6-augustus-gene-227.0-mRNA-1              | Indica | Indica | Kinase-LRR-TM | OsR498G0612844500.01.T01 | Putative LRR receptor-like serine/threonine-protein kinase             |                                                                            |
| maker-6-augustus-gene-232.7-mRNA-1              | Indica | Indica | Kinase-LRR-TM | OsR498G0612843300.01.T01 | Putative LRR receptor-like serine/threonine-protein kinase             |                                                                            |
| maker-6-augustus-gene-228.1-mRNA-1              | Indica | NA     | Kinase-LRR-TM | OsR498G0612847900.01.T01 | Putative LRR receptor-like serine/threonine-protein kinase             |                                                                            |
| maker-6-augustus-gene-231.7-mRNA-1              | Indica | Indica | Kinase-LRR-TM | OsR498G0612839000.01.T02 | Putative LRR receptor-like serine/threonine-protein kinase             |                                                                            |
| maker-6-augustus-gene-305.61-mRNA-1             | Indica | NA     | Kinase-LRR-TM | OsR498G0613308600.01.T01 | Leucine-rich repeat receptor-like protein kinase THICK TASSSEL DWARF 1 |                                                                            |
| maker-6-augustus-gene-44.21-mRNA-1              | Indica | Indica | Kinase-LRR-TM | OsR498G0611741800.01.T01 | Serine/threonine protein kinase                                        |                                                                            |
| maker-6-augustus-gene-43.23-mRNA-1              | Indica | Indica | Kinase-LRR-TM | OsR498G0611742000.01.T01 | Serine/threonine protein kinase                                        |                                                                            |
| maker-6-augustus-gene-44.5-mRNA-1               | Indica | NA     | Kinase-LRR-TM | OsR498G0611742000.01.T01 | LRR receptor-like serine/threonine-protein kinase EFR                  |                                                                            |
| maker-7-augustus-gene-183.22-mRNA-1             | Indica | NA     | Kinase-LRR-TM | OsR498G0714359600.01.T01 | LRR receptor-like serine/threonine-protein kinase                      |                                                                            |
| maker-8-augustus-gene-191.10-mRNA-1             | Indica | NA     | Kinase-LRR-TM | OsR498G0815955000.01.T01 | Receptor-like protein kinase 5                                         |                                                                            |
| maker-8-augustus-gene-231.37-mRNA-1             | Indica | NA     | Kinase-LRR-TM | OsR498G0816198400.01.T04 | Receptor-like protein kinase                                           |                                                                            |
| augustus-1-processed-gene-78.1-mRNA-1           | Indica | Indica | Kinase-LRR-TM | Os01g0239700             | OsR498G0100512300.01.T01                                               | Receptor-like protein kinase HSL1                                          |
| augustus-10-processed-gene-178.18-mRNA-1        | Indica | Indica | Kinase-LRR-TM | OsR498G101862700.01.T01  | Tyrosine-protein kinase                                                |                                                                            |
| augustus-11-processed-gene-30.12-mRNA-1         | Indica | Indica | Kinase-LRR-TM | Os01g012800              | OsR498G1119491700.01.T01                                               | Protein kinase domain-containing protein                                   |
| augustus-11-processed-gene-31.0-mRNA-1          | Indica | Indica | Kinase-LRR-TM | Os01g0171800             | OsR498G1119492700.01.T01                                               | Leucine-rich repeat receptor kinase (LRR-RK)                               |
| augustus-11-processed-gene-61.7-mRNA-1          | Indica | Indica | Kinase-LRR-TM | Os01g0249900             | OsR498G1119716500.01.T01                                               | Probably inactive leucine-rich repeat receptor-like protein kinase         |
| augustus-12-processed-gene-198.43-mRNA-1        | Indica | Indica | Kinase-LRR-TM | Os01g0249650             | OsR498G1221664100.01.T01                                               | Protein kinase domain-containing protein (Fragment)                        |
| augustus-2-processed-gene-213.6-mRNA-1          | Indica | Indica | Kinase-LRR-TM | Os01g0296500             | OsR498G0204100400.01.T01                                               | Putative LRR receptor-like serine/threonine-protein kinase                 |
| augustus-2-processed-gene-259.25-mRNA-1         | Indica | Indica | Kinase-LRR-TM | Os02g029400              | OsR498G0204348800.01.T01                                               | Phytosulfokine receptor 1                                                  |
| augustus-2-processed-gene-4.37-mRNA-1           | Indica | NA     | Kinase-LRR-TM | Os02g0211200             | OsR498G0202835400.01.T01                                               | Putative LRR receptor-like serine/threonine-protein kinase                 |
| augustus-2-processed-gene-6.27-mRNA-1           | Indica | Indica | Kinase-LRR-TM | Os02g0111800             | OsR498G0202835400.01.T01                                               | Leucine-rich repeat receptor-like protein kinase PXL2                      |
| augustus-4-processed-gene-237.18-mRNA-1         | Indica | Indica | Kinase-LRR-TM | Os04g0576900             | OsR498G0409129100.01.T01                                               | Probable inactive leucine-rich repeat receptor kinase XIAO                 |
| augustus-4-processed-gene-35.36-mRNA-1          | Indica | NA     | Kinase-LRR-TM | Os04g0274500             | OsR498G0412087700.01.T01                                               | Leucine-rich repeat protein kinase family protein                          |
| augustus-6-processed-gene-93.17-mRNA-1          | Indica | Indica | Kinase-LRR-TM | Os06g0342300             | OsR498G0615837200.01.T01                                               | Putative somatic embryogenesis protein kinase 1                            |
| augustus-8-processed-gene-158.35-mRNA-1         | Indica | NA     | Kinase-LRR-TM | Os08g054700              | OsR498G0816427000.01.T01                                               | Brassinosteroid LRR receptor kinase BR1.5                                  |
| augustus-8-processed-gene-296.38-mRNA-1         | Indica | NA     | Kinase-LRR-TM | Os08g054700              | OsR498G0816427000.01.T01                                               | Serine/threonine protein kinase                                            |
| augustus-9-processed-gene-74.22-mRNA-1          | Indica | Indica | Kinase-LRR-TM | Os09g0293500             | OsR498G0917002400.01.T01                                               | Brassinosteroid LRR receptor kinase BR1                                    |
| augustus_masked-1-processed-gene-306.22-mRNA-1  | Indica | NA     | Kinase-LRR-TM | Os01g0718300             | OsR498G0101902000.01.T01                                               | Brassinosteroid-insensitive 1                                              |
| augustus_masked-10-processed-gene-13.17-mRNA-1  | Indica | NA     | Kinase-LRR-TM | Os01g0114400             | OsR498G0101902000.01.T01                                               | Mitogen-activated protein kinase kinase kinase                             |
| augustus_masked-11-processed-gene-219.32-mRNA-1 | Indica | Indica | Kinase-LRR-TM | Os01g0624600             | OsR498G1120543200.01.T03                                               | GPRC kinase                                                                |
| augustus_masked-11-processed-gene-74.40-mRNA-1  | Indica | NA     | Kinase-LRR-TM | Os03g0332900             | OsR498G0305887500.01.T03                                               | Putative LRR receptor-like serine/threonine-protein kinase (Fragment)      |
| augustus_masked-3-processed-gene-153.48-mRNA-1  | Indica | NA     | Kinase-LRR-TM | Os03g0145000             | OsR498G0305887500.01.T03                                               | Putative inactive receptor kinase                                          |
| augustus_masked-3-processed-gene-22.39-mRNA-1   | Indica | NA     | Kinase-LRR-TM | Os03g0183800             | OsR498G0305221600.01.T01                                               | Leucine-rich repeat receptor-like protein kinase PXL2                      |
| augustus_masked-3-processed-gene-41.18-mRNA-1   | Indica | NA     | Kinase-LRR-TM | Os03g0183800             | OsR498G0305342500.01.T01                                               | Strubbelig-receptor family 6                                               |
| augustus_masked-3-processed-gene-450.56-mRNA-1  | Indica | NA     | Kinase-LRR-TM | Os03g0756200             | OsR498G0307070000.01.T03                                               | Lrr receptor-like serine/threonine-protein kinase rpk2                     |
| augustus_masked-4-processed-gene-199.39-mRNA-1  | Indica | NA     | Kinase-LRR-TM | Os04g0672100             | OsR498G040648600.01.T01                                                | Phytosulfokine receptor                                                    |
| augustus_masked-4-processed-gene-288.15-mRNA-1  | Indica | NA     | Kinase-LRR-TM | Os05g0588250             | OsR498G0511432300.01.T02                                               | Putative inactive receptor kinase                                          |
| augustus_masked-5-processed-gene-304.14-mRNA-1  | Indica | NA     | Kinase-LRR-TM | Os06g0587500             | OsR498G0612854100.01.T01                                               | U-box domain-containing protein 33-like isoform X1                         |
| augustus_masked-6-processed-gene-226.0-mRNA-1   | Indica | Indica | Kinase-LRR-TM | Os06g0587500             | OsR498G0612854100.01.T01                                               | Leucine-rich repeat protein kinase family protein                          |
| augustus_masked-6-processed-gene-231.29-mRNA-1  | Indica | Indica | Kinase-LRR-TM | Os06g0587500             | OsR498G0612854100.01.T01                                               | Leucine-rich repeat protein kinase family protein                          |
| augustus_masked-6-processed-gene-290.36-mRNA-1  | Indica | Indica | Kinase-LRR-TM | Os06g0692600             | OsR498G0613225000.01.T01                                               | Tyrosine-sulfated glycoprotein receptor 1                                  |
| augustus_masked-6-processed-gene-290.37-mRNA-1  | Indica | NA     | Kinase-LRR-TM | Os06g0692600             | OsR498G0613225000.01.T01                                               | Tyrosine-sulfated glycoprotein receptor 1                                  |
| augustus_masked-8-processed-gene-151.29-mRNA-1  | Indica | Indica | Kinase-LRR-TM | Os08g0518400             | OsR498G08165800700.01.T01                                              | LRR receptor-like serine/threonine-protein kinase EFR                      |
| augustus_masked-8-processed-gene-270.46-mRNA-1  | Indica | Indica | Kinase-LRR-TM | Os08g0518400             | OsR498G08165800700.01.T01                                              | Serine/threonine-protein kinase                                            |
| augustus_masked-9-processed-gene-118.25-mRNA-1  | Indica | Indica | Kinase-LRR-TM | Os09g0352000             | OsR498G0917242100.01.T03                                               | Putative leucine-rich repeat receptor-like serine/threonine-protein kinase |
| maker-1-augustus-gene-189.11-mRNA-1             | Indica | Indica | Kinase-LRR-TM | Os01g0514700             | OsR498G0101145500.01.T01                                               | Receptor protein kinase-like protein ZAR1                                  |
| maker-1-augustus-gene-189.13-mRNA-1             | Indica | Indica | Kinase-LRR-TM | Os01g0514700             | OsR498G0101145500.01.T01                                               | Protein kinase domain-containing protein                                   |
| maker-1-augustus-gene-230.10-mRNA-1             | Indica | NA     | Kinase-LRR-TM | Os01g0577600             | OsR498G0101394600.01.T01                                               | Leucine-rich repeat receptor protein kinase EXS                            |
| maker-1-augustus-gene-28.30-mRNA-1              | Indica | NA     | Kinase-LRR-TM | Os01g0152000             | OsR498G0100185300.01.T01                                               | LRR receptor-like serine/threonine-protein kinase EFR                      |
| maker-1-augustus-gene-284.39-mRNA-1             | Indica | NA     | Kinase-LRR-TM | Os01g0152000             | OsR498G0101747700.01.T01                                               | Protein MALE DISCOVERER 1                                                  |
| maker-1-augustus-gene-29.59-mRNA-1              | Indica | Indica | Kinase-LRR-TM | Os01g0152600             | OsR498G0100187100.01.T01                                               | Putative LRR receptor-like serine/threonine-protein kinase                 |
| maker-1-augustus-gene-29.60-mRNA-1              | Indica | Indica | Kinase-LRR-TM | Os01g0152600             | OsR498G0100187100.01.T01                                               | LRR receptor-like serine/threonine-protein kinase EFR                      |
| maker-1-augustus-gene-293.3-mRNA-1              | Indica | NA     | Kinase-LRR-TM | Os01g0152600             | OsR498G0100187100.01.T01                                               | Receptor kinase MRK4                                                       |
| maker-1-augustus-gene-293.3-mRNA-1              | Indica | NA     | Kinase-LRR-TM | Os01g0152600             | OsR498G0100187100.01.T01                                               | Leucine-rich repeat receptor kinase-like protein                           |
| maker-1-augustus-gene-302.17-mRNA-1             | Indica | Indica | Kinase-LRR-TM | Os01g0711200             | OsR498G0101870300.01.T01                                               | Leucine-rich repeat transmembrane protein kinase                           |
| maker-1-augustus-gene-317.35-mRNA-1             | Indica | Indica | Kinase-LRR-TM | Os01g0742400             | OsR498G0101973900.01.T01                                               | Protein kinase family protein with leucine-rich repeat domain              |
| maker-1-augustus-gene-477.5-mRNA-1              | Indica | Indica | Kinase-LRR-TM | Os01g0917500             | OsR498G0102576500.01.T05                                               | Leucine-rich repeat receptor protein kinase MSP1                           |
| maker-1-augustus-gene-498.14-mRNA-1             | Indica | Indica | Kinase-LRR-TM | Os01g0951700             | OsR498G010271100.01.T01                                                | Inactive leucine-rich repeat receptor-like protein kinase-like             |
| maker-1-augustus-gene-501.23-mRNA-1             | Indica | Indica | Kinase-LRR-TM | Os01g0960400             | OsR498G0102740800.01.T02                                               | Putative leucine-rich repeat receptor-like serine/threonine-protein kinase |
| maker-1-augustus-gene-509.16-mRNA-1             | Indica | Indica | Kinase-LRR-TM | Os01g0974900             | OsR498G0102790800.01.T02                                               | Mitogen-activated protein kinase kinase                                    |
| maker-1-augustus-gene-71.50-mRNA-1              | Indica | Indica | Kinase-LRR-TM | Os01g0228200             | OsR498G0100470100.01.T01                                               | Putative receptor kinase TRKc                                              |
| maker-10-augustus-gene-16.50-mRNA-1             | Indica | Indica | Kinase-LRR-TM | Os01g019200              | OsR498G0108061000.01.T01                                               | Putative LRR receptor-like serine/threonine-protein kinase                 |
| maker-10-augustus-gene-164.25-mRNA-1            | Indica | Indica | Kinase-LRR-TM | Os01g0485500             | OsR498G0108872900.01.T01                                               | MDIS1-interacting receptor-like kinase 2                                   |
| maker-11-augustus-gene-183.28-mRNA-1            | Indica | Indica | Kinase-LRR-TM | Os01g0592900             | OsR498G1120323500.01.T01                                               | Leucine-rich repeat protein kinase, expressed                              |
| maker-11-augustus-gene-187.15-mRNA-1            | Indica | Indica | Kinase-LRR-TM | Os01g0593900             | OsR498G1120383600.01.T02                                               | Leucine-rich repeat receptor-like kinase                                   |
| maker-11-augustus-gene-187.20-mRNA-1            | Indica | Indica | Kinase-LRR-TM | Os01g0595900             | OsR498G1120381200.01.T01                                               | Putative LRR receptor-like serine/threonine-protein kinase                 |
| maker-11-augustus-gene-188.40-mRNA-1            | Indica | Indica | Kinase-LRR-TM | Os01g0569600             | OsR498G1120386200.01.T01                                               | Receptor kinase-like protein (Fragment)                                    |
| maker-11-augustus-gene-209.14-mRNA-1            | Indica | Indica | Kinase-LRR-TM | Os01g0607200             | OsR498G1120487000.01.T01                                               | BRASSINOSTEROID INSENSITIVE 1-associated receptor kinase 1                 |
| maker-11-augustus-gene-217.42-mRNA-1            | Indica | Indica | Kinase-LRR-TM | Os01g0620500             | OsR498G0102391100.01.T04                                               | Leucine-rich repeat receptor-like protein kinase                           |
| maker-11-augustus-gene-220.23-mRNA-1            | Indica | Indica | Kinase-LRR-TM | Os01g0625900             | OsR498G1120550600.01.T01                                               | Putative LRR receptor-like serine/threonine-protein kinase                 |
| maker-11-augustus-gene-221.0-mRNA-1             | Indica | Indica | Kinase-LRR-TM | Os01g0628000             | OsR498G1120550600.01.T01                                               | Putative LRR receptor-like serine/threonine-protein kinase                 |
| maker-11-augustus-gene-257.26-mRNA-1            | Indica | Indica | Kinase-LRR-TM | Os01g0695700             | OsR498G1120742700.01.T01                                               | Putative receptor kinase TRKc                                              |
| maker-11-augustus-gene-257.28-mRNA-1            | Indica | Indica | Kinase-LRR-TM | Os01g0695700             | OsR498G1120742700.01.T01                                               | Protein kinase domain containing protein, expressed                        |
| maker-11-augustus-gene-258.22-mRNA-1            | Indica | Indica | Kinase-LRR-TM | Os01g0695600             | OsR498G1120747600.01.T01                                               | Serine/threonine protein kinase plant-type                                 |
| maker-11-augustus-gene-30.26-mRNA-1             | Indica | Indica | Kinase-LRR-TM | Os01g0171800             | OsR498G1119492700.01.T01                                               | Putative LRR receptor-like serine/threonine-protein kinase                 |
| maker-11-augustus-gene-30.62-mRNA-1             | Indica | Indica | Kinase-LRR-TM | Os01g0172700             | OsR498G1119488300.01.T02                                               | Putative LRR receptor-like serine/threonine-protein kinase                 |
| maker-11-augustus-gene-31.34-mRNA-1             | Indica | Indica | Kinase-LRR-TM | Os01g0173700             | OsR498G1119493500.01.T01                                               | Putative LRR receptor-like serine/threonine-protein kinase                 |
| maker-11-augustus-gene-31.36-mRNA-1             | Indica | Indica | Kinase-LRR-TM | Os01g0173500             | OsR498G1119494900.01.T07                                               | Putative LRR receptor-like serine/threonine-protein kinase                 |
| maker-11-augustus-gene-31.38-mRNA-1             | Indica | Indica | Kinase-LRR-TM | Os01g0173700             | OsR498G1119493500.01.T01                                               | Putative LRR receptor-like serine/threonine-protein kinase                 |
| maker-11-augustus-gene-31.40-mRNA-1             | Indica | Indica | Kinase-LRR-TM | Os01g013800              | OsR498G1119496700.01.T02                                               | Leucine-rich repeat family protein, expressed                              |
| maker-11-augustus-gene-31.44-mRNA-1             | Indica | Indica | Kinase-LRR-TM | Os01g0127900             | OsR498G1119494900.01.T01                                               | Leucine-rich repeat receptor-like protein kinase (LRR-RK)                  |
| maker-11-augustus-gene-58.29-mRNA-1             | Indica | Indica | Kinase-LRR-TM | Os01g0210400             | OsR498G1119689900.01.T01                                               | Probable leucine-rich repeat receptor-like protein kinase At5g49770        |
| maker-11-augustus-gene-71.10-mRNA-1             | Indica | Indica | Kinase-LRR-TM | Os01g0208900             | OsR498G1119599000.01.T01                                               | Serine/threonine protein kinase plant-type                                 |
| maker-11-augustus-gene-85.28-mRNA-1             | Indica | Indica | Kinase-LRR-TM | Os01g0208900             | OsR498G1119660500.01.T01                                               | Leucine-rich repeat receptor-like serine/threonine-protein kinase BAM3     |
| maker-12-augustus-gene-1.34-mRNA-1              | Indica | Indica | Kinase-LRR-TM | Os02g0567500             | OsR498G1220789200.01.T06                                               | Leucine-rich repeat protein kinase family protein                          |
| maker-12-augustus-gene-224.10-mRNA-1            | Indica | Indica | Kinase-LRR-TM | Os02g0567500             | OsR498G1221899800.01.T01                                               | Expressed protein kinase                                                   |
| maker-12-augustus-gene-24.29-mRNA-1             | Indica | Indica | Kinase-LRR-TM | Os01g0107700             | OsR498G1220930000.01.T02                                               | Leucine-rich repeat receptor-like protein kinase PXC1                      |
| maker-12-augustus-gene-4.60-mRNA-1              | Indica | Indica | Kinase-LRR-TM | Os01g0182300             | OsR498G1220804500.01.T01                                               | Probable leucine-rich repeat receptor-like protein kinase IMK3             |
| maker-12-augustus-gene-44.21-mRNA-1             | Indica | Indica | Kinase-LRR-TM | Os01g0210400             | OsR498G1221050600.01.T01                                               | Tyrosine-protein kinase                                                    |
| maker-12-augustus-gene-60.29-mRNA-1             | Indica | Indica | Kinase-LRR-TM | Os01g0306600             | OsR498G1221109900.01.T01                                               | Leucine-rich repeat receptor-like protein kinase                           |
| maker-12-augustus-gene-76.35-mRNA-1             | Indica | Indica | Kinase-LRR-TM | Os01g0306600             | OsR498                                                                 |                                                                            |

|                                                |          |          |               |              |                           |                                                                            |
|------------------------------------------------|----------|----------|---------------|--------------|---------------------------|----------------------------------------------------------------------------|
| maker-3-augustus-gene-62.58-mRNA-1             | Japanica | NA       | Kinase-LRR-TM | Os3g0223000  | OsR498G0305477500.01.T01  | Atypical receptor-like kinase MARK                                         |
| maker-3-augustus-gene-66.8-mRNA-1              | Japanica | NA       | Kinase-LRR-TM | Os3g0228800  | OsR498G0305501000.01.T01  | Leucine-rich repeat receptor-like serine/threonine-protein kinase BAM1     |
| maker-3-augustus-gene-84.1-mRNA-1              | Japanica | NA       | Kinase-LRR-TM | Os3g0246800  | OsR498G0305481800.01.T01  | LRR receptor-like serine/threonine-protein kinase FE1                      |
| maker-4-augustus-gene-175.77-mRNA-1            | Japanica | NA       | Kinase-LRR-TM | Os04g0457800 | OsR498G0408690200.01.T01  | Non-specific serine/threonine protein kinase                               |
| maker-4-augustus-gene-183.9-mRNA-1             | Japanica | NA       | Kinase-LRR-TM | Os04g0472500 | OsR498G0408749300.01.T01  | Inactive leucine-rich repeat receptor-like protein kinase                  |
| maker-4-augustus-gene-259.21-mRNA-1            | Japanica | Indica   | Kinase-LRR-TM | Os08g0203700 | OsR498G0409280800.01.T01  | Non-specific serine/threonine protein kinase                               |
| maker-4-augustus-gene-260.4-mRNA-1             | Japanica | Japanica | Kinase-LRR-TM | Os04g0616700 | OsR498G0409282800.01.T02  | Leucine-rich repeat transmembrane protein kinase                           |
| maker-4-augustus-gene-261.7-mRNA-1             | Japanica | NA       | Kinase-LRR-TM | Os04g0618700 | OsR498G0409282000.01.T01  | LRR receptor-like protein serine/threonine-protein kinase FL52             |
| maker-4-augustus-gene-274.7-mRNA-1             | Japanica | NA       | Kinase-LRR-TM | Os04g0649700 | OsR498G0409289000.01.T01  | Putative inactive receptor kinase                                          |
| maker-2-augustus-gene-294.22-mRNA-1            | Japanica | NA       | Kinase-LRR-TM | 0            | OsR498G0409512300.01.T01  | Serine/threonine protein kinase                                            |
| maker-4-augustus-gene-296.8-mRNA-1             | Japanica | NA       | Kinase-LRR-TM | Os04g0685900 | OsR498G0409512200.01.T01  | Receptor-like kinase TMK3                                                  |
| maker-4-augustus-gene-35.2-mRNA-1              | Japanica | NA       | Kinase-LRR-TM | 0            | OsR498G0407776100.01.T01  | Putative LRR receptor-like serine/threonine-protein kinase                 |
| maker-4-augustus-gene-35.3-mRNA-1              | Japanica | NA       | Kinase-LRR-TM | 0            | 0                         | Putative LRR receptor-like serine/threonine-protein kinase                 |
| maker-5-augustus-gene-141.9-mRNA-1             | Japanica | NA       | Kinase-LRR-TM | 0            | OsR498G0510445000.01.T01  | Serine/threonine protein kinase                                            |
| maker-5-augustus-gene-242.5-mRNA-1             | Japanica | NA       | Kinase-LRR-TM | Os05g0471000 | OsR498G0511021200.01.T03  | Inactive receptor-like serine/threonine-protein kinase (Fragment)          |
| maker-5-augustus-gene-246.40-mRNA-1            | Japanica | NA       | Kinase-LRR-TM | Os05g0478300 | OsR498G0511047500.01.T01  | Protein kinase domain-containing protein (Fragment)                        |
| maker-5-augustus-gene-250.6-mRNA-1             | Japanica | NA       | Kinase-LRR-TM | Os05g0486100 | OsR498G0511075400.01.T01  | Putative leucine-rich repeat receptor-like protein kinase                  |
| maker-5-augustus-gene-271.7-mRNA-1             | Japanica | Indica   | Kinase-LRR-TM | Os01g0742400 | OsR498G0511207000.01.T01  | Protein kinase family protein with leucine-rich repeat domain              |
| maker-5-augustus-gene-272.49-mRNA-1            | Japanica | NA       | Kinase-LRR-TM | Os05g0524500 | OsR498G0511212300.01.T01  | Putative receptor-like protein kinase                                      |
| maker-5-augustus-gene-272.52-mRNA-1            | Japanica | Indica   | Kinase-LRR-TM | Os05g0524600 | OsR498G0511212900.01.T03  | Putative serine/threonine-specific receptor protein kinase                 |
| maker-5-augustus-gene-272.63-mRNA-1            | Japanica | Japanica | Kinase-LRR-TM | Os05g0525000 | OsR498G0511214700.01.T01  | Putative serine/threonine-specific receptor protein kinase                 |
| maker-5-augustus-gene-272.65-mRNA-1            | Japanica | NA       | Kinase-LRR-TM | Os05g0525550 | OsR498G0511214700.01.T01  | Putative receptor-like protein kinase                                      |
| maker-5-augustus-gene-272.68-mRNA-1            | Japanica | NA       | Kinase-LRR-TM | Os05g0525600 | OsR498G0511215100.01.T01  | Putative leucine-rich repeat receptor-like protein kinase                  |
| maker-5-augustus-gene-272.71-mRNA-1            | Japanica | Indica   | Kinase-LRR-TM | Os05g0525550 | OsR498G0511215300.01.T01  | Putative serine/threonine-specific receptor protein kinase                 |
| maker-5-augustus-gene-40.0-mRNA-1              | Japanica | Indica   | Kinase-LRR-TM | Os01g0170300 | OsR498G0509825300.01.T01  | Mitogen-activated protein kinase kinase kinase                             |
| maker-5-augustus-gene-89.0-mRNA-1              | Japanica | NA       | Kinase-LRR-TM | 0            | 0                         | Putative leucine-rich repeat receptor-like protein kinase                  |
| maker-5-augustus-gene-94.45-mRNA-1             | Japanica | Indica   | Kinase-LRR-TM | Os04g0291900 | OsR498G0510160500.01.T05  | Non-specific serine/threonine protein kinase                               |
| maker-5-augustus-gene-95.16-mRNA-1             | Japanica | NA       | Kinase-LRR-TM | Os04g0291900 | OsR498G0510174900.01.T02  | Non-specific serine/threonine protein kinase                               |
| maker-5-augustus-gene-96.10-mRNA-1             | Japanica | Indica   | Kinase-LRR-TM | Os05g0257100 | OsR498G0510172500.01.T03  | Non-specific serine/threonine protein kinase                               |
| maker-6-augustus-gene-132.5-mRNA-1             | Japanica | NA       | Kinase-LRR-TM | 0            | OsR498G0612537000.01.T03  | CPK kinase                                                                 |
| maker-6-augustus-gene-231.0-mRNA-1             | Japanica | NA       | Kinase-LRR-TM | Os04g0657100 | OsR498G0612745000.01.T04  | Protein kinase family protein with leucine-rich repeat domain              |
| maker-6-augustus-gene-211.5-mRNA-1             | Japanica | NA       | Kinase-LRR-TM | Os04g0557700 | OsR498G0612758100.01.T01  | Serine/threonine protein kinase                                            |
| maker-6-augustus-gene-224.30-mRNA-1            | Japanica | NA       | Kinase-LRR-TM | 0            | 0                         | LRR receptor-like serine/threonine-protein kinase EFR                      |
| maker-6-augustus-gene-225.34-mRNA-1            | Japanica | Indica   | Kinase-LRR-TM | Os12g0498650 | OsR498G0612836400.01.T01  | Putative LRR receptor-like serine/threonine-protein kinase                 |
| maker-6-augustus-gene-225.37-mRNA-1            | Japanica | Indica   | Kinase-LRR-TM | Os06g0587900 | OsR498G0612837400.01.T02  | Putative LRR receptor-like serine/threonine-protein kinase                 |
| maker-6-augustus-gene-228.0-mRNA-1             | Japanica | Japanica | Kinase-LRR-TM | Os06g0588150 | OsR498G0612846900.01.T01  | Putative LRR receptor-like serine/threonine-protein kinase                 |
| maker-6-augustus-gene-228.1-mRNA-1             | Japanica | NA       | Kinase-LRR-TM | 0            | OsR498G0612847900.01.T01  | Putative LRR receptor-like serine/threonine-protein kinase                 |
| maker-6-augustus-gene-229.0-mRNA-1             | Japanica | NA       | Kinase-LRR-TM | 0            | OsR498G0612851100.01.T02  | Leucine-rich repeat protein kinase family protein                          |
| maker-6-augustus-gene-230.0-mRNA-1             | Japanica | NA       | Kinase-LRR-TM | 0            | 0                         | Protein kinase domain-containing protein (Fragment)                        |
| maker-6-augustus-gene-232.45-mRNA-1            | Japanica | NA       | Kinase-LRR-TM | 0            | OsR498G0612858300.01.T01  | Leucine-rich repeat protein kinase family protein                          |
| maker-6-augustus-gene-259.6-mRNA-1             | Japanica | Indica   | Kinase-LRR-TM | Os02g0190500 | OsR498G0613020200.01.T02  | Putative STRUBBELIG family receptor protein kinase                         |
| maker-6-augustus-gene-261.62-mRNA-1            | Japanica | NA       | Kinase-LRR-TM | 0            | OsR498G0613032800.01.T01  | Leucine-rich repeat protein kinase family protein isoform 2                |
| maker-7-augustus-gene-213.74-mRNA-1            | Japanica | NA       | Kinase-LRR-TM | 0            | OsR498G061458200.01.T01   | Protein kinase domain-containing protein                                   |
| maker-7-augustus-gene-225.38-mRNA-1            | Japanica | NA       | Kinase-LRR-TM | Os07g0568100 | OsR498G0714596100.01.T01  | Modulation receptor kinase A                                               |
| maker-7-augustus-gene-229.75-mRNA-1            | Japanica | Indica   | Kinase-LRR-TM | Os07g0574100 | OsR498G0714615800.01.T01  | Receptor-kinase isolog                                                     |
| maker-7-augustus-gene-241.21-mRNA-1            | Japanica | NA       | Kinase-LRR-TM | Os07g0597200 | OsR498G0714696400.01.T01  | Leucine-rich repeat transmembrane protein kinase                           |
| maker-7-augustus-gene-253.23-mRNA-1            | Japanica | NA       | Kinase-LRR-TM | Os07g0618400 | OsR498G0714763500.01.T01  | Protein STRUBBELIG-RECEPTOR FAMILY 7                                       |
| maker-7-augustus-gene-267.83-mRNA-1            | Japanica | NA       | Kinase-LRR-TM | Os07g0645900 | OsR498G0714794900.01.T01  | Inactive receptor kinase                                                   |
| maker-7-augustus-gene-287.50-mRNA-1            | Japanica | NA       | Kinase-LRR-TM | Os07g0681100 | OsR498G0714964600.01.T02  | Putative inactive receptor kinase isoform A                                |
| maker-7-augustus-gene-32.32-mRNA-1             | Japanica | NA       | Kinase-LRR-TM | Os07g0166700 | OsR498G0713584300.01.T02  | Leucine-rich repeat transmembrane protein kinase, putative, expressed      |
| maker-7-augustus-gene-7.39-mRNA-1              | Japanica | NA       | Kinase-LRR-TM | Os07g0121200 | OsR498G0713427200.01.T01  | Putative LRR receptor-like serine/threonine-protein kinase                 |
| maker-7-augustus-gene-81.0-mRNA-1              | Japanica | NA       | Kinase-LRR-TM | Os07g0251900 | OsR498G0713893500.01.T01  | Putative LRR receptor-like serine/threonine-protein kinase                 |
| maker-8-augustus-gene-218.56-mRNA-1            | Japanica | Indica   | Kinase-LRR-TM | Os07g0400500 | OsR498G0816116200.01.T01  | Mitogen-activated protein kinase kinase kinase                             |
| maker-8-augustus-gene-229.54-mRNA-1            | Japanica | NA       | Kinase-LRR-TM | Os08g0442700 | OsR498G0816185400.01.T01  | Serine/threonine protein kinase                                            |
| maker-8-augustus-gene-263.40-mRNA-1            | Japanica | Indica   | Kinase-LRR-TM | Os08g0560400 | OsR498G0816427500.01.T03  | Receptor protein kinase-like protein ZAR1                                  |
| maker-8-augustus-gene-272.13-mRNA-1            | Japanica | Japanica | Kinase-LRR-TM | Os08g0521200 | OsR498G0816482400.01.T01  | Putative transferase, protein kinase RLK-Pelle-LRR-III family              |
| maker-8-augustus-gene-45.34-mRNA-1             | Japanica | NA       | Kinase-LRR-TM | Os08g0174700 | OsR498G0815299300.01.T01  | Non-specific serine/threonine protein kinase                               |
| maker-8-augustus-gene-60.1-mRNA-1              | Japanica | Japanica | Kinase-LRR-TM | Os08g0201700 | OsR498G0815383300.01.T05  | Non-specific serine/threonine protein kinase                               |
| maker-8-augustus-gene-61.24-mRNA-1             | Japanica | NA       | Kinase-LRR-TM | 0            | 0                         | Non-specific serine/threonine protein kinase                               |
| maker-8-augustus-gene-61.30-mRNA-1             | Japanica | NA       | Kinase-LRR-TM | Os08g0203300 | OsR498G0815386700.01.T02  | Non-specific serine/threonine protein kinase                               |
| maker-8-augustus-gene-61.36-mRNA-1             | Japanica | NA       | Kinase-LRR-TM | 0            | 0                         | Putative Receptor-like serine/threonine kinase(RFK1)                       |
| maker-8-augustus-gene-61.45-mRNA-1             | Japanica | Indica   | Kinase-LRR-TM | Os08g0203400 | OsR498G0815387700.01.T03  | Non-specific serine/threonine protein kinase                               |
| maker-8-augustus-gene-61.50-mRNA-1             | Japanica | NA       | Kinase-LRR-TM | Os08g0203700 | OsR498G0815387900.01.T03  | Non-specific serine/threonine protein kinase                               |
| maker-8-augustus-gene-93.6-mRNA-1              | Japanica | NA       | Kinase-LRR-TM | Os08g0248100 | OsR498G0815355500.01.T02  | Putative LRR receptor-like serine/threonine-protein kinase                 |
| maker-8-augustus-gene-93.7-mRNA-1              | Japanica | NA       | Kinase-LRR-TM | Os08g0248100 | OsR498G0815355500.01.T01  | Putative LRR receptor-like serine/threonine-protein kinase                 |
| maker-8-augustus-gene-93.8-mRNA-1              | Japanica | Japanica | Kinase-LRR-TM | Os08g0248100 | OsR498G0815355700.01.T01  | Receptor kinase                                                            |
| maker-9-augustus-gene-105.27-mRNA-1            | Japanica | Indica   | Kinase-LRR-TM | Os09g0353200 | OsR498G0917227800.01.T02  | Putative LRR receptor-like serine/threonine-protein kinase                 |
| maker-9-augustus-gene-105.36-mRNA-1            | Japanica | Japanica | Kinase-LRR-TM | Os09g0352000 | OsR498G0917223000.01.T02  | Putative leucine-rich repeat receptor-like serine/threonine-protein kinase |
| maker-9-augustus-gene-106.25-mRNA-1            | Japanica | NA       | Kinase-LRR-TM | Os09g0351700 | OsR498G0917215200.01.T01  | Serine/threonine-specific receptor protein kinase-like                     |
| maker-9-augustus-gene-106.28-mRNA-1            | Japanica | NA       | Kinase-LRR-TM | Os09g0359900 | OsR498G0917215200.01.T01  | Serine/threonine-specific receptor protein kinase-like                     |
| maker-9-augustus-gene-107.2-mRNA-1             | Japanica | NA       | Kinase-LRR-TM | Os09g0352000 | OsR498G0917216200.01.T01  | Serine/threonine-specific receptor protein kinase-like                     |
| maker-9-augustus-gene-107.4-mRNA-1             | Japanica | Japanica | Kinase-LRR-TM | Os09g0349800 | OsR498G0917216200.01.T01  | Putative LRR receptor-like serine/threonine-protein kinase                 |
| maker-9-augustus-gene-109.22-mRNA-1            | Japanica | NA       | Kinase-LRR-TM | 0            | 0                         | Leucine rich repeat mallectin kinase 1                                     |
| maker-9-augustus-gene-115.0-mRNA-1             | Japanica | NA       | Kinase-LRR-TM | Os09g0355400 | 0                         | Sensence-induced receptor-like serine/threonine-protein kinase             |
| maker-9-augustus-gene-115.7-mRNA-1             | Japanica | Indica   | Kinase-LRR-TM | Os09g0352000 | OsR498G0917236000.01.T01  | Putative leucine-rich repeat receptor-like serine/threonine-protein kinase |
| maker-9-augustus-gene-116.5-mRNA-1             | Japanica | Japanica | Kinase-LRR-TM | Os09g0356800 | OsR498G0917239000.01.T01  | Leucine-rich repeat protein kinase-like                                    |
| maker-9-augustus-gene-117.0-mRNA-1             | Japanica | NA       | Kinase-LRR-TM | Os09g0356800 | OsR498G0917239000.01.T01  | Putative LRR receptor-like serine/threonine-protein kinase                 |
| maker-9-augustus-gene-127.37-mRNA-1            | Japanica | NA       | Kinase-LRR-TM | Os09g0376600 | 0                         | Modulation receptor kinase                                                 |
| maker-9-augustus-gene-223.67-mRNA-1            | Japanica | NA       | Kinase-LRR-TM | Os09g0559900 | OsR498G0917947700.01.T02  | STRUBBELIG-receptor family 6                                               |
| maker-9-augustus-gene-9.8-mRNA-1               | Japanica | NA       | Kinase-LRR-TM | Os09g0101000 | OsR498G0916673100.01.T01  | LRR-RLK                                                                    |
| maker-9-augustus-gene-97.48-mRNA-1             | Japanica | NA       | Kinase-LRR-TM | Os09g0326100 | OsR498G0917161200.01.T01  | Receptor-like protein kinase HSL1                                          |
| augustus-1-processed-gene-308.2-mRNA-1         | NA       | NA       | Kinase-LRR-TM | Os10g0871300 | OsR498G10244100.01.T01    | Receptor-like protein kinase HSL1                                          |
| augustus-1-processed-gene-412.37-mRNA-1        | NA       | Indica   | Kinase-LRR-TM | Os05g0588250 | OsR498G101507200.01.T01   | Serine/threonine protein kinase                                            |
| augustus-1-processed-gene-439.40-mRNA-1        | NA       | NA       | Kinase-LRR-TM | Os10g0873800 | OsR498G102446100.01.T01   | Receptor-like protein kinase HAKU2                                         |
| augustus-1-processed-gene-463.44-mRNA-1        | NA       | Indica   | Kinase-LRR-TM | Os05g0588250 | OsR498G101507200.01.T01   | Serine/threonine protein kinase                                            |
| augustus-10-processed-gene-80.22-mRNA-1        | NA       | Indica   | Kinase-LRR-TM | Os11g0692100 | OsR498G1018382300.01.T01  | Leucine-rich repeat receptor kinase-type protein                           |
| augustus-12-processed-gene-274.19-mRNA-1       | NA       | NA       | Kinase-LRR-TM | Os12g0626000 | OsR498G1222161300.01.T01  | Receptor-like protein kinase HAKU2                                         |
| augustus-2-processed-gene-259.25-mRNA-1        | NA       | NA       | Kinase-LRR-TM | Os02g0239400 | OsR498G023436800.01.T01   | Phytosulfokine receptor 1                                                  |
| augustus-2-processed-gene-331.30-mRNA-1        | NA       | NA       | Kinase-LRR-TM | Os06g0628700 | OsR498G0613173300.01.T01  | Protein kinase domain-containing protein (Fragment)                        |
| augustus-2-processed-gene-334.32-mRNA-1        | NA       | NA       | Kinase-LRR-TM | 0            | OsR498G0613116800.01.T01  | Pollen receptor-like kinase 4                                              |
| augustus-2-processed-gene-9.69-mRNA-1          | NA       | NA       | Kinase-LRR-TM | Os02g0116700 | OsR498G0202850700.01.T01  | Phytosulfokine receptor 1                                                  |
| augustus-4-processed-gene-190.60-mRNA-1        | NA       | NA       | Kinase-LRR-TM | Os04g0487200 | OsR498G0408799300.01.T01  | Inactive LRR receptor-like serine/threonine-protein kinase                 |
| augustus-7-processed-gene-249.0-mRNA-1         | NA       | NA       | Kinase-LRR-TM | Os07g0601200 | OsR498G0714711500.01.T01  | LRR receptor-like serine/threonine-protein kinase                          |
| augustus-8-processed-gene-110.4-mRNA-1         | NA       | NA       | Kinase-LRR-TM | Os08g0274400 | OsR498G0815617800.01.T01  | Tyrosine protein kinase                                                    |
| augustus-8-processed-gene-158.35-mRNA-1        | NA       | NA       | Kinase-LRR-TM | Os08g0342300 | OsR498G0815837200.01.T01  | Brassinosteroid LRR receptor kinase BRL3                                   |
| augustus_masked-4-processed-gene-199.39-mRNA-1 | NA       | NA       | Kinase-LRR-TM | 0            | 0                         | probable leucine-rich repeat receptor-like protein kinase AL2g33170        |
| augustus_masked-6-processed-gene-226.0-mRNA-1  | NA       | NA       | Kinase-LRR-TM | 0            | 0                         | Protein kinase domain-containing protein 33-like isoform X1                |
| augustus_masked-6-processed-gene-278.2-mRNA-1  | NA       | NA       | Kinase-LRR-TM | Os06g0667000 | OsR498G0613173300.01.T01  | Protein kinase domain-containing protein (Fragment)                        |
| augustus_masked-6-processed-gene-51.1-mRNA-1   | NA       | NA       | Kinase-LRR-TM | Os06g0198800 | OsR498G06131789100.01.T01 | Pollen receptor-like protein kinase 3                                      |
| augustus_masked-8-processed-gene-257.1-mRNA-1  | NA       | Indica   | Kinase-LRR-TM | Os08g0493800 | OsR498G0816372100.01.T01  | LRR receptor-like serine/threonine-protein kinase                          |
| augustus_masked-8-processed-gene-270.46-mRNA-1 | NA       | NA       | Kinase-LRR-TM | Os08g0518400 | 0                         | Serine/threonine protein kinase                                            |
| augustus_masked-9-processed-gene-53.22-mRNA-1  | NA       | Indica   | Kinase-LRR-TM | Os05g0525550 | OsR498G0916869900.01.T01  | Putative serine/threonine-specific receptor protein kinase                 |
| maker-1-augustus-gene-13.58-mRNA-1             | NA       | Indica   | Kinase-LRR-TM | Os05g0524500 | OsR498G1010082200.01.T01  | Putative serine/threonine-specific receptor protein kinase                 |
| maker-1-augustus-gene-246.65-mRNA-1            | NA       | Indica   | Kinase-LRR-TM | Os05g0588250 | OsR498G101507200.01.T01   | Serine/threonine protein kinase                                            |
| maker-1-augustus-gene-29.61-mRNA-1             | NA       | NA       | Kinase-LRR-TM | Os01g0153000 | 0                         | LRR receptor-like serine/threonine-protein kinase EFR                      |
| maker-1-augustus-gene-351.29-mRNA-1            | NA       | NA       | Kinase-LRR-TM | 0            | OsR498G102189200.01.T01   | Putative light repressible receptor protein kinase                         |
| maker-1-augustus-gene-352.48-mRNA-1            | NA       | NA       | Kinase-LRR-TM | 0            | OsR498G102192000.01.T01   | Putative light repressible receptor protein kinase                         |
| maker-1-augustus-gene-37.14-mRNA-1             | NA       | NA       | Kinase-LRR-TM | 0            | OsR498G100238400.01.T01   | Leucine-rich repeat receptor-like kinase                                   |
| maker-1-augustus-gene-58.40-mRNA-1             | NA       | NA       | Kinase-LRR-TM | 0            | OsR498G100378000.01.T01   | Transmembrane kinase                                                       |
| maker-1-augustus-gene-68.41-mRNA-1             | NA       | Indica   | Kinase-LRR-TM | Os10g0226600 | OsR498G102446400.01.T01   | Inactive leucine-rich repeat receptor-like serine/threonine-protein kinase |
| maker-10-augustus-gene-133.4-mRNA-1            | NA       | NA       | Kinase-LRR-TM | Os04g0132500 | OsR498G0407514500.01.T01  | rr receptor-like serine/threonine-protein kinase rh1                       |
| maker-10-augustus-gene-163.28-mRNA-1           | NA       | Indica   | Kinase-LRR-TM | Os10g0467900 | OsR498G1018870200.01.T01  | Receptor protein kinase                                                    |
| maker-10-augustus-gene-164.25-mRNA-1           | NA       | NA       | Kinase-LRR-TM | Os10g0468500 | OsR498G1018872900.01.T01  | MDIS1-interacting receptor-like protein kinase PEPR1                       |
| maker-10-augustus-gene-38.0-mRNA-1             | NA       | Indica   | Kinase-LRR-TM | Os10g0155800 | OsR498G1018171900.01.T01  | Leucine-rich repeat receptor-like protein kinase                           |
| maker-11-augustus-gene-123.41-mRNA-1           | NA       | Japanica | Kinase-LRR-TM | Os11g0448000 | OsR498G1120059500.01.T01  | Receptor-like kinase TMK4 isoform A                                        |
| maker-11-augustus-gene-148.27-mRNA-1           | NA       | NA       | Kinase-LRR-TM | Os11g0495200 | 0                         | Putative LRR receptor-like serine/threonine-protein kinase                 |
| maker-11-augustus-gene-188.43-mRNA-1           | NA       | Japanica | Kinase-LRR-TM | Os11g0569800 | OsR498                    |                                                                            |

|                                          |          |          |                |                          |                           |                                                                             |
|------------------------------------------|----------|----------|----------------|--------------------------|---------------------------|-----------------------------------------------------------------------------|
| maker-6-augustus-gene-16.8-mRNA-1        | NA       | NA       | Kinase-LRR-TM  | Os06g0130100             | OsR498G0611562900.01.T01  | LRR receptor-like serine/threonine-protein kinase ERECTA                    |
| maker-6-augustus-gene-18.4-mRNA-1        | NA       | NA       | Kinase-LRR-TM  | Os06g134700              | OsR498G0611585900.01.T01  | Somatic embryogenesis receptor kinase 4                                     |
| maker-6-augustus-gene-20.14-mRNA-1       | NA       | NA       | Kinase-LRR-TM  | 0                        | OsR498G0611714500.01.T01  | Calmodulin-binding receptor kinase CaMLK                                    |
| maker-6-augustus-gene-225.34-mRNA-1      | NA       | Indica   | Kinase-LRR-TM  | Os12g0498650             | OsR498G0612836400.01.T01  | Putative LRR receptor-like serine/threonine-protein kinase                  |
| maker-6-augustus-gene-228.0-mRNA-1       | NA       | Japonica | Kinase-LRR-TM  | Os06g0586150             | OsR498G0612846900.01.T01  | Putative LRR receptor-like serine/threonine-protein kinase                  |
| maker-6-augustus-gene-228.6-mRNA-1       | NA       | Indica   | Kinase-LRR-TM  | Os06g0586150             | OsR498G0612847900.01.T01  | Leucine-rich repeat protein kinase family protein                           |
| maker-6-augustus-gene-229.0-mRNA-1       | NA       | NA       | Kinase-LRR-TM  | 0                        | OsR498G0612851100.01.T02  | Leucine-rich repeat protein kinase family protein                           |
| maker-6-augustus-gene-230.0-mRNA-1       | NA       | NA       | Kinase-LRR-TM  | 0                        | OsR498G0612852500.01.T01  | Protein kinase domain-containing protein (Fragment)                         |
| maker-6-augustus-gene-230.3-mRNA-1       | NA       | Japonica | Kinase-LRR-TM  | Os06g0587500             | OsR498G0612853900.01.T01  | Putative LRR receptor-like serine/threonine-protein kinase                  |
| maker-6-augustus-gene-231.7-mRNA-1       | NA       | Indica   | Kinase-LRR-TM  | Os06g0587900             | OsR498G0612839900.01.T02  | Putative LRR receptor-like serine/threonine-protein kinase                  |
| maker-6-augustus-gene-274.6-mRNA-1       | NA       | NA       | Kinase-LRR-TM  | 0                        | OsR498G0613109100.01.T01  | Protein STRUBBELIG-RECEPTOR FAMILY 1                                        |
| maker-6-augustus-gene-275.4-mRNA-1       | NA       | NA       | Kinase-LRR-TM  | 0                        | OsR498G0613116800.01.T01  | Pollen receptor-like kinase 4                                               |
| maker-6-augustus-gene-53.26-mRNA-1       | NA       | NA       | Kinase-LRR-TM  | Os06g0203800             | OsR498G0611808400.01.T02  | LRR receptor-like serine/threonine-protein kinase ERECTA                    |
| maker-6-augustus-gene-65.20-mRNA-1       | NA       | NA       | Kinase-LRR-TM  | 0                        | OsR498G0613123400.01.T01  | Non-specific serine/threonine-protein kinase                                |
| maker-6-augustus-gene-92.12-mRNA-1       | NA       | NA       | Kinase-LRR-TM  | Os06g0272000             | OsR498G0612078200.01.T01  | Receptor kinase MRKa                                                        |
| maker-7-augustus-gene-14.37-mRNA-1       | NA       | NA       | Kinase-LRR-TM  | 0                        | OsR498G0713472300.01.T02  | Putative LRR receptor-like serine/threonine-protein kinase                  |
| maker-7-augustus-gene-14.43-mRNA-1       | NA       | Indica   | Kinase-LRR-TM  | Os07g0134200             | OsR498G0713470200.01.T01  | Leucine-rich repeat receptor-like serine/threonine-protein kinase BAM1      |
| maker-7-augustus-gene-19.33-mRNA-1       | NA       | NA       | Kinase-LRR-TM  | Os07g0145400             | OsR498G0713506400.01.T01  | Tyrosine-protein kinase                                                     |
| maker-7-augustus-gene-24.35-mRNA-1       | NA       | NA       | Kinase-LRR-TM  | OsR498G0713530800.01.T02 | OsR498G0713530800.01.T02  | Leucine-rich repeat receptor-like serine/threonine-protein kinase At1g17230 |
| maker-7-augustus-gene-54.15-mRNA-1       | NA       | NA       | Kinase-LRR-TM  | Os07g0207100             | OsR498G0713723400.01.T01  | Leucine-rich repeat receptor-like tyrosine-protein kinase PKC3              |
| maker-8-augustus-gene-10.40-mRNA-1       | NA       | NA       | Kinase-LRR-TM  | Os08g0117700             | OsR498G0815080100.01.T01  | Somatic embryogenesis receptor kinase 5-like                                |
| maker-8-augustus-gene-191.10-mRNA-1      | NA       | NA       | Kinase-LRR-TM  | Os08g0376300             | OsR498G0815955000.01.T01  | Receptor-like protein kinase 5                                              |
| maker-8-augustus-gene-29.0-mRNA-1        | NA       | NA       | Kinase-LRR-TM  | 0                        | OsR498G081585900.01.T01   | Leucine-rich repeat receptor-like protein kinase TDR                        |
| maker-9-augustus-gene-106.25-mRNA-1      | NA       | NA       | Kinase-LRR-TM  | Os09g0351700             | OsR498G0912716200.01.T01  | Serine/threonine-specific receptor protein kinase-like                      |
| maker-9-augustus-gene-107.2-mRNA-1       | NA       | Indica   | Kinase-LRR-TM  | Os09g0352000             | OsR498G0912716200.01.T01  | Serine/threonine-specific receptor protein kinase-like                      |
| maker-9-augustus-gene-107.74-mRNA-1      | NA       | Japonica | Kinase-LRR-TM  | Os09g0349800             | OsR498G0912716200.01.T01  | Putative LRR receptor-like serine/threonine-protein kinase                  |
| maker-9-augustus-gene-115.0-mRNA-1       | NA       | NA       | Kinase-LRR-TM  | Os09g0355400             | OsR498G0912716200.01.T01  | Senescence-induced receptor-like serine/threonine-protein kinase            |
| maker-9-augustus-gene-117.0-mRNA-1       | NA       | NA       | Kinase-LRR-TM  | Os09g0356800             | OsR498G0912739900.01.T02  | Putative LRR receptor-like serine/threonine-protein kinase                  |
| maker-9-augustus-gene-184.37-mRNA-1      | NA       | Indica   | Kinase-LRR-TM  | Os08g0493800             | OsR498G0917690700.01.T01  | Serine/threonine protein kinase                                             |
| augustus-2-processed-gene-28.42-mRNA-1   | Japonica | NA       | Kinase-LRR-NBS | 0                        | OsR498G0917716200.01.T01  | Disease resistance protein RGA2                                             |
| augustus-2-processed-gene-211.2-mRNA-1   | Japonica | NA       | LRR            | Os11g0609700             | OsR498G0917716200.01.T01  | Disease resistance protein RPM1                                             |
| maker-10-augustus-gene-157.12-mRNA-1     | Japonica | NA       | LRR            | Os10g0456200             | OsR498G1018837200.01.T01  | LRR repeat and ubiquitin-like domain-containing protein isoform X2          |
| maker-11-augustus-gene-30.29-mRNA-1      | Japonica | NA       | LRR            | Os11g0172300             | OsR498G1018837200.01.T01  | Protein kinase domain-containing protein                                    |
| maker-2-augustus-gene-283.29-mRNA-1      | Japonica | NA       | LRR            | Os02g0675800             | OsR498G0204514700.01.T03  | RING/U-box superfamily protein                                              |
| maker-3-augustus-gene-56.49-mRNA-1       | Japonica | NA       | LRR            | 0                        | OsR498G0305445900.01.T02  | Plant intracellular Ras-group-related LRR protein 7                         |
| maker-6-augustus-gene-73.27-mRNA-1       | Japonica | NA       | LRR            | 0                        | OsR498G0611964800.01.T03  | NLR family CARD domain-containing protein 3                                 |
| maker-8-augustus-gene-285.55-mRNA-1      | Japonica | NA       | LRR            | OsR498G0816555300.01.T02 | OsR498G0816555300.01.T02  | NB-ARC domain-containing protein                                            |
| maker-12-augustus-gene-276.42-mRNA-1     | NA       | NA       | LRR            | Os07g106100              | OsR498G0713370900.01.T01  | Dynein assembly factor 1, axonemal                                          |
| maker-2-augustus-gene-326.42-mRNA-1      | NA       | NA       | LRR            | Os06g0677500             | OsR498G0613173700.01.T01  | Protein geranylgeranyltransferase type II                                   |
| maker-4-augustus-gene-252.6-mRNA-1       | NA       | NA       | LRR            | Os04g0605300             | OsR498G0409234800.01.T02  | Plant intracellular Ras-group-related LRR protein 1                         |
| maker-6-augustus-gene-283.34-mRNA-1      | NA       | NA       | LRR            | Os06g0677500             | OsR498G0613173700.01.T01  | Protein geranylgeranyltransferase type II                                   |
| maker-9-augustus-gene-15.0-mRNA-1        | NA       | Indica   | LRR            | 0                        | OsR498G0917259900.01.T01  | LRR receptor-like serine/threonine-protein kinase ERECTA                    |
| augustus-5-processed-gene-141.42-mRNA-1  | Japonica | Japonica | LRR-NBS        | Os02g0282400             | OsR498G0917259900.01.T01  | Plant intracellular Ras-group-related LRR protein 6                         |
| maker-11-augustus-gene-248.32-mRNA-1     | Japonica | Japonica | LRR-NBS        | Os05g0305600             | OsR498G0510413500.01.T01  | NB-ARC domain containing protein, expressed                                 |
| maker-11-augustus-gene-248.32-mRNA-1     | NA       | Japonica | LRR-NBS        | Os11g0673900             | OsR498G1120709100.01.T03  | Putative nucleotide-binding leucine-rich-repeat protein 1                   |
| maker-7-augustus-gene-172.1-mRNA-1       | NA       | NA       | LRR-NBS        | Os11g0673900             | OsR498G1120709100.01.T03  | Putative nucleotide-binding leucine-rich-repeat protein 1                   |
| augustus-5-processed-gene-25.16-mRNA-1   | Indica   | NA       | LRR-NBS-TM     | Os06g138100              | OsR498G1120709100.01.T03  | Disease resistance protein RPM1                                             |
| maker-9-augustus-gene-99.0-mRNA-1        | Indica   | NA       | LRR-NBS-TM     | Os07g0327800             | OsR498G1120709100.01.T03  | NB-ARC domain containing protein, expressed                                 |
| augustus-10-processed-gene-44.0-mRNA-1   | Japonica | NA       | LRR-NBS-TM     | 0                        | OsR498G1018206100.01.T04  | NBS-LRR disease resistance protein-like                                     |
| augustus-11-processed-gene-228.19-mRNA-1 | Japonica | Japonica | LRR-NBS-TM     | Os11g0640300             | OsR498G1120612100.01.T01  | NB-ARC domain containing protein, expressed                                 |
| augustus-11-processed-gene-83.15-mRNA-1  | Japonica | NA       | LRR-NBS-TM     | Os11g0222400             | OsR498G1119649900.01.T03  | Leucine Rich Repeat family protein, expressed                               |
| augustus-7-processed-gene-42.1-mRNA-1    | Japonica | NA       | LRR-NBS-TM     | Os07g186500              | OsR498G0713652100.01.T01  | NBS-LRR type protein (Fragment)                                             |
| augustus-9-processed-gene-121.26-mRNA-1  | Japonica | Japonica | LRR-NBS-TM     | Os09g0345000             | OsR498G091259900.01.T01   | Disease resistance protein RPM1                                             |
| augustus-11-processed-gene-147.22-mRNA-1 | Japonica | NA       | LRR-NBS-TM     | Os11g0359800             | OsR498G1109941400.01.T02  | PPC domain-containing protein                                               |
| augustus-11-processed-gene-183.19-mRNA-1 | Japonica | NA       | LRR-NBS-TM     | Os11g0560000             | OsR498G1120357400.01.T01  | Powdery mildew resistance protein PM3 variant                               |
| augustus-11-processed-gene-228.26-mRNA-1 | Japonica | NA       | LRR-NBS-TM     | Os11g0639600             | OsR498G1120357400.01.T01  | Disease resistance protein RPM1                                             |
| augustus-11-processed-gene-341.23-mRNA-1 | Japonica | NA       | LRR-NBS-TM     | Os11g0639600             | OsR498G1120610200.01.T02  | NB-ARC domain containing protein, expressed                                 |
| augustus-11-processed-gene-221.11-mRNA-1 | Japonica | Indica   | LRR-NBS-TM     | Os03g0566700             | OsR498G1120610200.01.T02  | NBS-LRR protein (Fragment)                                                  |
| augustus-11-processed-gene-92.26-mRNA-1  | Japonica | Indica   | LRR-NBS-TM     | Os04g0548100             | OsR498G040904200.01.T01   | Disease resistance protein RPM1                                             |
| augustus-11-processed-gene-121.19-mRNA-1 | Japonica | Japonica | LRR-NBS-TM     | Os09g0365300             | OsR498G091259900.01.T01   | Disease resistance protein RPM1                                             |
| maker-1-augustus-gene-116.31-mRNA-1      | Japonica | NA       | LRR-NBS-TM     | Os01g0308300             | OsR498G0100770300.01.T01  | Protein kinase domain-containing protein                                    |
| maker-1-augustus-gene-497.55-mRNA-1      | Japonica | Japonica | LRR-NBS-TM     | Os11g0953400             | OsR498G0100770300.01.T01  | Putative NB-ARC domain-containing protein (Fragment)                        |
| maker-10-augustus-gene-23.77-mRNA-1      | Japonica | NA       | LRR-NBS-TM     | Os10g0132500             | OsR498G10102712500.01.T01 | Leucine Rich Repeat family protein, expressed                               |
| maker-11-augustus-gene-209.8-mRNA-1      | Japonica | Japonica | LRR-NBS-TM     | Os11g0166400             | OsR498G1120484800.01.T01  | Putative retrotransposon elements TNP2                                      |
| maker-11-augustus-gene-209.9-mRNA-1      | Japonica | Indica   | LRR-NBS-TM     | Os11g0606400             | OsR498G1120485600.01.T01  | NB-ARC domain containing protein, expressed                                 |
| maker-11-augustus-gene-224.0-mRNA-1      | Japonica | NA       | LRR-NBS-TM     | Os11g0633500             | OsR498G1120581500.01.T03  | NB-ARC domain containing protein, expressed                                 |
| maker-11-augustus-gene-254.11-mRNA-1     | Japonica | NA       | LRR-NBS-TM     | 0                        | OsR498G1120737800.01.T01  | Disease resistance protein RPP8                                             |
| maker-7-augustus-gene-125.41-mRNA-1      | Japonica | NA       | LRR-NBS-TM     | Os10g0568600             | OsR498G1019224400.01.T01  | Disease resistance protein Pils-1                                           |
| maker-7-augustus-gene-156.17-mRNA-1      | Japonica | NA       | LRR-NBS-TM     | 0                        | OsR498G0714220800.01.T01  | NB-ARC domain-containing protein (Fragment)                                 |
| maker-7-augustus-gene-172.14-mRNA-1      | Japonica | NA       | LRR-NBS-TM     | Os07g0481300             | OsR498G0714220800.01.T01  | NB-ARC domain, putative                                                     |
| maker-7-augustus-gene-98.5-mRNA-1        | Japonica | NA       | LRR-NBS-TM     | Os07g0273700             | OsR498G0714220800.01.T01  | Putative disease resistance protein RGA3                                    |
| augustus-11-processed-gene-180.30-mRNA-1 | NA       | NA       | LRR-NBS-TM     | Os11g0550500             | OsR498G1120333300.01.T05  | WRKY domain-containing protein                                              |
| augustus-11-processed-gene-83.15-mRNA-1  | NA       | NA       | LRR-NBS-TM     | Os11g0222400             | OsR498G1120333300.01.T05  | Disease resistance protein RPM1                                             |
| augustus-6-processed-gene-33.72-mRNA-1   | NA       | NA       | LRR-NBS-TM     | Os11g0227800             | OsR498G1119649900.01.T03  | NBS-LRR type protein (Fragment)                                             |
| augustus-10-processed-gene-25.16-mRNA-1  | NA       | NA       | LRR-NBS-TM     | Os03g136100              | OsR498G1119650700.01.T02  | Leaf rust resistance protein Lr10                                           |
| augustus-3-processed-gene-251.52-mRNA-1  | NA       | NA       | LRR-NBS-TM     | Os03g0599400             | OsR498G0306422200.01.T01  | NB-ARC domain containing protein, expressed                                 |
| augustus-3-processed-gene-345.38-mRNA-1  | NA       | NA       | LRR-NBS-TM     | Os03g0599400             | OsR498G0306422200.01.T01  | Leucine Rich Repeat family protein, expressed                               |
| augustus-3-processed-gene-360.14-mRNA-1  | NA       | NA       | LRR-NBS-TM     | Os03g0599400             | OsR498G0306422200.01.T01  | Putative disease resistance protein RGA3                                    |
| maker-1-augustus-gene-494.48-mRNA-1      | NA       | NA       | LRR-NBS-TM     | Os01g0947700             | OsR498G010947700.01.T01   | Leucine Rich Repeat family protein, expressed                               |
| maker-2-augustus-gene-108.14-mRNA-1      | NA       | NA       | LRR-NBS-TM     | Os02g0284700             | OsR498G020284700.01.T01   | Beta 1,3-glucanase                                                          |
| maker-3-augustus-gene-236.44-mRNA-1      | NA       | NA       | LRR-NBS-TM     | Os03g0573500             | OsR498G0306422200.01.T01  | Putative disease resistance protein RGA3                                    |
| maker-3-augustus-gene-239.29-mRNA-1      | NA       | NA       | LRR-NBS-TM     | 0                        | OsR498G0306441900.01.T01  | Putative NB-ARC type disease resistance protein                             |
| maker-3-augustus-gene-349.0-mRNA-1       | NA       | NA       | LRR-NBS-TM     | 0                        | OsR498G0306441900.01.T01  | Putative NB-ARC type disease resistance protein                             |
| maker-3-augustus-gene-360.49-mRNA-1      | NA       | Japonica | LRR-NBS-TM     | Os03g0599000             | OsR498G0306507000.01.T01  | Putative NB-ARC domain-containing protein                                   |
| maker-3-augustus-gene-495.20-mRNA-1      | NA       | Japonica | LRR-NBS-TM     | Os03g0849100             | OsR498G03068000.01.T01    | NB-ARC domain-containing protein                                            |
| maker-6-augustus-gene-151.38-mRNA-1      | NA       | NA       | LRR-NBS-TM     | Os04g1215500             | OsR498G0411546000.01.T01  | Powdery mildew resistance protein PM3 variant                               |
| maker-6-augustus-gene-32.9-mRNA-1        | NA       | NA       | LRR-NBS-TM     | Os06g163800              | OsR498G0611676000.01.T01  | NBS-LRR type 1 protein Pgm-B8                                               |
| maker-8-augustus-gene-198.41-mRNA-1      | NA       | NA       | LRR-NBS-TM     | Os08g0388300             | OsR498G0815986100.01.T07  | Disease resistance protein RPP3                                             |
| maker-8-augustus-gene-198.49-mRNA-1      | NA       | NA       | LRR-NBS-TM     | Os08g0387700             | OsR498G0815985400.01.T03  | Disease resistance protein RPM1                                             |
| maker-9-augustus-gene-55.8-mRNA-1        | NA       | NA       | LRR-NBS-TM     | 0                        | OsR498G0916877900.01.T01  | Disease resistance protein RPM1                                             |
| maker-9-augustus-gene-99.0-mRNA-1        | NA       | NA       | LRR-NBS-TM     | 0                        | OsR498G0916877900.01.T01  | NBS-LRR disease resistance protein-like                                     |
| maker-9-augustus-gene-284.7-mRNA-1       | Japonica | Indica   | LRR-NBS-TM     | Os09g0339700             | OsR498G0916877900.01.T01  | Pib variant protein (Fragment)                                              |
| augustus-2-processed-gene-166.21-mRNA-1  | Indica   | NA       | LRR-TM         | OsR498G0203803900.01.T01 | OsR498G0203803900.01.T01  | NB-ARC domain-containing protein                                            |
| augustus-2-processed-gene-247.15-mRNA-1  | Indica   | Indica   | LRR-TM         | OsR498G0204309700.01.T01 | OsR498G0204309700.01.T01  | Putative LRR receptor-like serine/threonine-protein kinase (Fragment)       |
| augustus-2-processed-gene-251.11-mRNA-1  | Indica   | NA       | LRR-TM         | OsR498G0204309700.01.T01 | OsR498G0204309700.01.T01  | Leucine-rich repeat-like protein                                            |
| augustus-2-processed-gene-31.11-mRNA-1   | Indica   | NA       | LRR-TM         | Os02g0155700             | OsR498G0203018700.01.T01  | Tyrosine-sulfated glycoprotein receptor 1                                   |
| augustus-2-processed-gene-34.2-mRNA-1    | Indica   | Japonica | LRR-TM         | Os02g0161700             | OsR498G0203018700.01.T01  | LRR receptor-like serine/threonine-protein kinase FL52                      |
| augustus-8-processed-gene-103.47-mRNA-1  | Indica   | NA       | LRR-TM         | Os06g026400              | OsR498G0611964900.01.T01  | Putative somatic embryogenesis receptor kinase 1                            |
| maker-1-augustus-gene-350.22-mRNA-1      | Indica   | NA       | LRR-TM         | OsR498G020182300.01.T02  | OsR498G020182300.01.T02   | BRASSINOSTEROID INSENSITIVE 1-associated receptor kinase 1                  |
| maker-10-augustus-gene-164.29-mRNA-1     | Indica   | Japonica | LRR-TM         | OsR498G1018872900.01.T01 | OsR498G1018872900.01.T01  | MDIS1-interacting receptor-like kinase 2                                    |
| maker-11-augustus-gene-74.2-mRNA-1       | Indica   | NA       | LRR-TM         | OsR498G1119610600.01.T03 | OsR498G1119610600.01.T03  | NBS-LRR disease resistance protein family-4                                 |
| maker-2-augustus-gene-247.3-mRNA-1       | Indica   | NA       | LRR-TM         | OsR498G0204309700.01.T01 | OsR498G0204309700.01.T01  | LRR receptor-like serine/threonine-protein kinase EFR                       |
| maker-3-augustus-gene-199.10-mRNA-1      | Indica   | NA       | LRR-TM         | Os03g0400850             | OsR498G0306864590.01.T01  | Putative LRR receptor-like serine/threonine-protein kinase                  |
| maker-3-augustus-gene-298.34-mRNA-1      | Indica   | NA       | LRR-TM         | Os10g0376200             | OsR498G1018578500.01.T02  | Dynein assembly factor 1, axonemal                                          |
| maker-4-augustus-gene-112.45-mRNA-1      | Indica   | Indica   | LRR-TM         | Os04g0439700             | OsR498G0408227200.01.T02  | Putative verticillium wilt disease resistance protein                       |
| maker-8-augustus-gene-260.0-mRNA-1       | Indica   | Indica   | LRR-TM         | Os08g0499900             | OsR498G0816398100.01.T01  | F-box protein At-B                                                          |
| augustus-1-processed-gene-311.1-mRNA-1   | Japonica | NA       | LRR-TM         | Os11g0729400             | OsR498G010933900.01.T01   | Receptor-like protein 29                                                    |
| augustus-1-processed-gene-185.22-mRNA-1  | Japonica | NA       | LRR-TM         | Os11g0565000             | OsR498G1120373300.01.T01  | Leucine Rich Repeat family protein, expressed                               |
| augustus-11-processed-gene-75.39-mRNA-1  | Japonica | NA       | LRR-TM         | Os11g0213500             | OsR498G1119649900.01.T01  | Pentatricopeptide repeat-containing protein                                 |
| augustus-12-processed-gene-66.22-mRNA-1  | Japonica | Indica   | LRR-TM         | Os12g0218500             | OsR498G1221134900.01.T01  | Leucine Rich Repeat family protein, expressed                               |
| augustus-2-processed-gene-20.27-mRNA-1   | Japonica | NA       | LRR-TM         | Os02g0138000             | OsR498G0202928200.01.T01  | Leucine-rich repeat extensin-like protein 1                                 |
| augustus-2-processed-gene-238.27-mRNA-1  | Japonica | NA       | LRR-TM         | Os02g0603100             | OsR498G0204256200.01.T01  | Leucine-rich repeat receptor-like protein CLAVATA2                          |
| augustus-2-processed-gene-242.0-mRNA-1   | Japonica | NA       | LRR-TM         | Os02g0609900             | OsR498G0204256200.01.T01  | Receptor-like protein kinase                                                |
| augustus-2-processed-gene-312.6-mRNA-1   | Japonica | NA       | LRR-TM         | Os02g0156400             | OsR498G0202998000.01.T01  | Protein kinase domain-containing protein (Fragment)                         |
| augustus-2-processed-gene-34.2-mRNA-1    | Japonica | Japonica | LRR-TM         | Os02g0161700             | OsR498G0203018700.01.T01  | Putative LRR receptor-like serine/threonine-protein kinase FL52             |
| augustus-4-processed-gene-275.33-mRNA-1  | Japonica | NA       | LRR-T          |                          |                           |                                                                             |

|                                                 |          |          |        |                          |                           |                                                                                        |    |  |  |
|-------------------------------------------------|----------|----------|--------|--------------------------|---------------------------|----------------------------------------------------------------------------------------|----|--|--|
| maker-11-augustus-gene-184.0-mRNA-1             | Japonica | NA       | LRR-TM |                          |                           |                                                                                        |    |  |  |
| maker-11-augustus-gene-74.2-mRNA-1              | Japonica | NA       | LRR-TM |                          |                           |                                                                                        |    |  |  |
| maker-11-augustus-gene-75.17-mRNA-1             | Japonica | Indica   | LRR-TM | Os11g0213700             | OsR498G1119610600.01.T03  | NBS-LRR disease resistance protein family-4                                            |    |  |  |
| maker-2-augustus-gene-100.57-mRNA-1             | Japonica | NA       | LRR-TM | Os2g02074200             | OsR498G1119615600.01.T02  | Disease resistance protein RGA2                                                        |    |  |  |
| maker-2-augustus-gene-190.3-mRNA-1              | Japonica | NA       | LRR-TM |                          |                           |                                                                                        |    |  |  |
| maker-2-augustus-gene-244.45-mRNA-1             | Japonica | NA       | LRR-TM |                          |                           |                                                                                        |    |  |  |
| maker-2-augustus-gene-31.64-mRNA-1              | Japonica | NA       | LRR-TM | Os2g0613200              | OsR498G0204293400.01.T01  | Regulatory subunit                                                                     |    |  |  |
| maker-2-augustus-gene-74.39-mRNA-1              | Japonica | NA       | LRR-TM | Os2g0215800              | OsR498G0203001200.01.T02  | Tyrosine-sulfated glycopeptide receptor 1                                              |    |  |  |
| maker-3-augustus-gene-22.0-mRNA-1               | Japonica | NA       | LRR-TM | Os2g0223000              | OsR498G0203274700.01.T03  | Protein phosphatase 1 regulatory subunit pprA                                          |    |  |  |
| maker-3-augustus-gene-42.49-mRNA-1              | Japonica | NA       | LRR-TM | Os3g0440900              | OsR498G0304297500.01.T01  | Somatic embryogenesis receptor kinase 1                                                |    |  |  |
| maker-3-augustus-gene-44.53-mRNA-1              | Japonica | Indica   | LRR-TM | Os3g0318400              | OsR498G0305345100.01.T01  | Leucine-rich repeat receptor-like serine/threonine-protein kinase                      |    |  |  |
| maker-3-augustus-gene-46.25-mRNA-1              | Japonica | NA       | LRR-TM | Os3g0190300              | OsR498G0305366800.01.T02  | Dynein assembly factor 1, axonemal                                                     |    |  |  |
| maker-3-augustus-gene-56.75-mRNA-1              | Japonica | NA       | LRR-TM | Os3g0795300              | OsR498G0307198000.01.T01  | Leucine-rich repeat extensin-like protein 6                                            |    |  |  |
| maker-4-augustus-gene-187.12-mRNA-1             | Japonica | NA       | LRR-TM | Os4g0480500              | OsR498G0305445400.01.T01  | probable leucine-rich repeat receptor-like protein kinase At1g35710                    |    |  |  |
| maker-4-augustus-gene-198.30-mRNA-1             | Japonica | NA       | LRR-TM | Os4g0503500              | OsR498G040870900.01.T01   | Serine/threonine-protein kinase BR1-like protein 2                                     |    |  |  |
| maker-4-augustus-gene-259.29-mRNA-1             | Japonica | Indica   | LRR-TM | Os4g0616700              | OsR498G0408848000.01.T07  | F-box/LRR-repeat protein 14-like isoform X2                                            |    |  |  |
| maker-4-augustus-gene-259.33-mRNA-1             | Japonica | Indica   | LRR-TM | Os4g0616700              | OsR498G0409282200.01.T05  | Non-specific serine/threonine protein kinase                                           |    |  |  |
| maker-4-augustus-gene-259.37-mRNA-1             | Japonica | Indica   | LRR-TM | Os4g0616700              | OsR498G0409282400.01.T05  | Non-specific serine/threonine protein kinase                                           |    |  |  |
| maker-4-augustus-gene-275.3-mRNA-1              | Japonica | NA       | LRR-TM |                          | OsR498G0409378300.01.T01  | LRR binding protein                                                                    |    |  |  |
| maker-5-augustus-gene-200.18-mRNA-1             | Japonica | NA       | LRR-TM | Os5g0393100              | OsR498G0510775500.01.T01  | Serine-threonine protein kinase, plant-type, putative isoform 2                        |    |  |  |
| maker-5-augustus-gene-258.5-mRNA-1              | Japonica | NA       | LRR-TM | Os5g0501600              | OsR498G0511119100.01.T01  | Dynein light chain 1, axonemal                                                         |    |  |  |
| maker-5-augustus-gene-31.26-mRNA-1              | Japonica | NA       | LRR-TM | Os5g0515400              | OsR498G0509763000.01.T01  | Putative receptor protein kinase TMK1                                                  |    |  |  |
| maker-5-augustus-gene-96.3-mRNA-1               | Japonica | Indica   | LRR-TM | Os5g0527100              | OsR498G0510169700.01.T01  | Non-specific serine/threonine protein kinase                                           |    |  |  |
| maker-6-augustus-gene-249.63-mRNA-1             | Japonica | Japonica | LRR-TM | Os5g06021500             | OsR498G0512965800.01.T01  | NAF domain-containing protein                                                          |    |  |  |
| maker-6-augustus-gene-250.44-mRNA-1             | Japonica | NA       | LRR-TM | Os5g0621500              | OsR498G0512965800.01.T01  | Putative disease resistance RPP13-like protein 1                                       |    |  |  |
| maker-6-augustus-gene-291.69-mRNA-1             | Japonica | NA       | LRR-TM | Os5g0692700              | OsR498G0613225200.01.T03  | Tyrosine-sulfated glycopeptide receptor 1                                              |    |  |  |
| maker-8-augustus-gene-267.30-mRNA-1             | Japonica | NA       | LRR-TM |                          | OsR498G0616450000.01.T02  | Plant intracellular Ras-group-related LRR protein 4                                    |    |  |  |
| maker-9-augustus-gene-218.12-mRNA-1             | Japonica | NA       | LRR-TM | Os09g058300              | OsR498G0917614700.01.T01  | Putative leucine-rich repeat receptor-like serine/threonine-protein kinase             |    |  |  |
| augustus-1-processed-gene-240.28-mRNA-1         | NA       | Indica   | LRR-TM | Os09g058300              | OsR498G0917912500.01.T01  | Chitin elicitor-binding protein                                                        |    |  |  |
| augustus-1-processed-gene-29.2-mRNA-1           | NA       | Japonica | LRR-TM | Os1g0153000              | OsR498G0102493700.01.T01  | Leucine-rich repeat extensin-like protein 3                                            |    |  |  |
| augustus-1-processed-gene-394.52-mRNA-1         | NA       | NA       | LRR-TM | Os1g01891700             | OsR498G0102493700.01.T01  | RNA polymerase Rpb7-like, N-terminal domain                                            |    |  |  |
| augustus-1-processed-gene-395.39-mRNA-1         | NA       | NA       | LRR-TM | Os1g01892300             | OsR498G0102496500.01.T01  | Putative systemin receptor SR160                                                       |    |  |  |
| augustus-1-processed-gene-403.32-mRNA-1         | NA       | NA       | LRR-TM | 0                        | OsR498G0101567200.01.T01  | Protein TOO MANY MOUTHS like                                                           |    |  |  |
| augustus-1-processed-gene-446.16-mRNA-1         | NA       | NA       | LRR-TM | Os1g01892300             | OsR498G0102496500.01.T01  | Putative systemin receptor SR160                                                       |    |  |  |
| augustus-1-processed-gene-446.3-mRNA-1          | NA       | NA       | LRR-TM | Os1g01891700             | OsR498G0102493700.01.T01  | RNA polymerase Rpb7-like, N terminal domain                                            |    |  |  |
| augustus-1-processed-gene-454.40-mRNA-1         | NA       | NA       | LRR-TM | 0                        | OsR498G0101567200.01.T01  | Protein TOO MANY MOUTHS like                                                           |    |  |  |
| augustus-1-processed-gene-466.5-mRNA-1          | NA       | NA       | LRR-TM | Os1g01601700             |                           | LRR receptor-like serine/threonine-protein kinase GSO1                                 |    |  |  |
| augustus-11-processed-gene-230.23-mRNA-1        | NA       | NA       | LRR-TM | Os1g01604100             | OsR498G1120628100.01.T01  | Leucine-rich repeat receptor-like kinase protein THICK TASSSEL DWARF1                  |    |  |  |
| augustus-12-processed-gene-68.16-mRNA-1         | NA       | Japonica | LRR-TM | Os1g0222800              | OsR498G1221130500.01.T01  | Leucine Rich Repeat family protein, expressed                                          |    |  |  |
| augustus-2-processed-gene-166.21-mRNA-1         | NA       | NA       | LRR-TM | 0                        | OsR498G0203803900.01.T01  | NB-ARC domain-containing protein                                                       |    |  |  |
| augustus-2-processed-gene-246.15-mRNA-1         | NA       | NA       | LRR-TM |                          | OsR498G0204304700.01.T01  | Leucine-rich repeat-like protein                                                       |    |  |  |
| augustus-2-processed-gene-247.15-mRNA-1         | NA       | Indica   | LRR-TM | Os2g0615300              | OsR498G0204309700.01.T01  | Putative LRR receptor-like serine/threonine-protein kinase (Fragment)                  |    |  |  |
| augustus-4-processed-gene-146.12-mRNA-1         | NA       | NA       | LRR-TM | 0                        | OsR498G0408493900.01.T01  | Protein kinase domain containing protein, expressed                                    |    |  |  |
| augustus-5-processed-gene-274.72-mRNA-1         | NA       | NA       | LRR-TM | Os5g0530701              | OsR498G0511233000.01.T01  | Too many mouths protein                                                                |    |  |  |
| augustus-8-processed-gene-102.47-mRNA-1         | NA       | NA       | LRR-TM | Os5g0626400              |                           | Putative somatic embryogenesis protein kinase 1                                        |    |  |  |
| augustus_masked-1-processed-gene-265.17-mRNA-1  | NA       | NA       | LRR-TM | OsR498G0101567200.01.T01 | OsR498G0101567200.01.T01  | Protein TOO MANY MOUTHS like                                                           |    |  |  |
| augustus_masked-1-processed-gene-418.57-mRNA-1  | NA       | Indica   | LRR-TM | Os1g01594300             | OsR498G0101457300.01.T01  | Leucine-rich repeat extensin-like protein 3                                            |    |  |  |
| augustus_masked-1-processed-gene-470.9-mRNA-1   | NA       | Indica   | LRR-TM | Os1g01594300             | OsR498G0101457300.01.T01  | Leucine-rich repeat extensin-like protein 3                                            |    |  |  |
| augustus_masked-12-processed-gene-63.37-mRNA-1  | NA       | Japonica | LRR-TM | Os1g0215950              | OsR498G1221115800.01.T01  | Leucine Rich Repeat family protein, expressed                                          |    |  |  |
| augustus_masked-3-processed-gene-16.27-mRNA-1   | NA       | NA       | LRR-TM | Os3g0313400              | OsR498G0305181500.01.T01  | Chitin elicitor-binding protein (Fragment)                                             |    |  |  |
| augustus_masked-5-processed-gene-2.69-mRNA-1    | NA       | Japonica | LRR-TM | Os5g0104600              | OsR498G0509566700.01.T01  | Polygalacturonase inhibitor                                                            |    |  |  |
| augustus_masked-5-processed-gene-3.57-mRNA-1    | NA       | NA       | LRR-TM | Os5g0104700              | OsR498G0509566700.01.T01  | Polygalacturonase inhibitor                                                            |    |  |  |
| augustus_masked-6-processed-gene-21.33-mRNA-1   | NA       | NA       | LRR-TM | Os5g0614000              | OsR498G0611600200.01.T01  | Serine/threonine-protein kinase bri1, putative                                         |    |  |  |
| augustus_masked-6-processed-gene-21.35-mRNA-1   | NA       | NA       | LRR-TM | Os5g06140200             | OsR498G0611600600.01.T01  | Leucine-rich repeat domain, L domain like protein                                      |    |  |  |
| augustus_masked-6-processed-gene-21.36-mRNA-1   | NA       | NA       | LRR-TM | Os5g06140300             | OsR498G0611601000.01.T01  | (Phosphatase 2A protein)-leucine-carboxy methyltransferase 1                           |    |  |  |
| maker-1-augustus-gene-25.37-mRNA-1              | NA       | NA       | LRR-TM | Os1g0140400              | OsR498G0100141500.01.T06  | Di-glucose binding protein with Leucine-rich repeat domain                             |    |  |  |
| maker-1-augustus-gene-32.49-mRNA-1              | NA       | NA       | LRR-TM | 0                        | OsR498G007494400.01.T01   | LRR receptor-like serine/threonine-protein kinase FL52                                 |    |  |  |
| maker-10-augustus-gene-139.21-mRNA-1            | NA       | NA       | LRR-TM | 0                        | OsR498G007494400.01.T01   | Protein kinase domain-containing protein                                               |    |  |  |
| maker-10-augustus-gene-164.29-mRNA-1            | NA       | Japonica | LRR-TM | Os1g0649600              | OsR498G1018872900.01.T01  | MDIS1-interacting receptor like kinase 2                                               |    |  |  |
| maker-10-augustus-gene-30.6-mRNA-1              | NA       | NA       | LRR-TM | Os1g0210400              | OsR498G1018135400.01.T02  | probable leucine-rich repeat receptor-like protein kinase At5g49770                    |    |  |  |
| maker-11-augustus-gene-74.2-mRNA-1              | NA       | NA       | LRR-TM | 0                        | OsR498G1119610600.01.T03  | NBS-LRR disease resistance protein family-4                                            |    |  |  |
| maker-12-augustus-gene-12.12-mRNA-1             | NA       | NA       | LRR-TM |                          |                           | NB-ARC domain-containing protein                                                       |    |  |  |
| maker-12-augustus-gene-18.48-mRNA-1             | NA       | NA       | LRR-TM |                          |                           | NB-ARC domain-containing protein                                                       |    |  |  |
| maker-12-augustus-gene-281.10-mRNA-1            | NA       | NA       | LRR-TM | Os07g0115400             |                           | LRR receptor-like serine/threonine-protein kinase FL52                                 |    |  |  |
| maker-2-augustus-gene-190.3-mRNA-1              | NA       | NA       | LRR-TM |                          |                           |                                                                                        |    |  |  |
| maker-2-augustus-gene-234.0-mRNA-1              | NA       | NA       | LRR-TM | Os2g0593600              | OsR498G0204224100.01.T01  | Plant intracellular Ras-group-related LRR protein 2                                    |    |  |  |
| maker-2-augustus-gene-247.5-mRNA-1              | NA       | Indica   | LRR-TM | Os2g0615800              | OsR498G0204310500.01.T04  | LRR receptor-like serine/threonine-protein kinase EFR                                  |    |  |  |
| maker-2-augustus-gene-248.0-mRNA-1              | NA       | Indica   | LRR-TM | Os2g0615300              | OsR498G0204314300.01.T03  | Putative receptor like protein 12                                                      |    |  |  |
| maker-2-augustus-gene-31.58-mRNA-1              | NA       | NA       | LRR-TM |                          |                           | Protein kinase domain-containing protein (Fragment)                                    |    |  |  |
| maker-2-augustus-gene-31.66-mRNA-1              | NA       | NA       | LRR-TM |                          |                           | Tyrosine-sulfated glycopeptide receptor 1                                              |    |  |  |
| maker-2-augustus-gene-31.67-mRNA-1              | NA       | Japonica | LRR-TM | Os2g0157200              | OsR498G0202990800.01.T01  | Tyrosine-sulfated glycopeptide receptor 1                                              |    |  |  |
| maker-4-augustus-gene-275.10-mRNA-1             | NA       | NA       | LRR-TM |                          |                           | Phytosulfokine receptor 1                                                              |    |  |  |
| maker-5-augustus-gene-104.35-mRNA-1             | NA       | Indica   | LRR-TM | Os4g0291900              | OsR498G0510203700.01.T01  | Non-specific serine/threonine protein kinase                                           |    |  |  |
| maker-5-augustus-gene-2.13-mRNA-1               | NA       | NA       | LRR-TM | Os5g0104100              | OsR498G0509566700.01.T01  | Vacuolar sorting protein 39/Transforming growth factor beta receptor-associated domain |    |  |  |
| maker-5-augustus-gene-40.2-mRNA-1               | NA       | NA       | LRR-TM | Os5g0170300              | OsR498G0509827500.01.T01  | LRR receptor-like serine/threonine-protein kinase                                      |    |  |  |
| maker-5-augustus-gene-40.23-mRNA-1              | NA       | NA       | LRR-TM | Os5g0170700              | OsR498G0509830600.01.T01  | Protein NSP-INTERACTING KINASE 2                                                       |    |  |  |
| maker-5-augustus-gene-98.23-mRNA-1              | NA       | NA       | LRR-TM | Os498G0407958200.01.T02  | OsR498G0407958200.01.T02  | Non-specific serine/threonine protein kinase                                           |    |  |  |
| maker-6-augustus-gene-249.63-mRNA-1             | NA       | Japonica | LRR-TM | Os5g0621500              | OsR498G0612965800.01.T01  | NAF domain-containing protein                                                          |    |  |  |
| maker-6-augustus-gene-25.37-mRNA-1              | NA       | NA       | LRR-TM | Os5g0621500              | OsR498G0612965800.01.T01  | NAF domain-containing protein (Fragment)                                               |    |  |  |
| maker-6-augustus-gene-30.71-mRNA-1              | NA       | NA       | LRR-TM | Os5g06179800             | OsR498G0611719000.01.T01  | Putative leucine-rich repeat domain, L domain-containing protein                       |    |  |  |
| maker-6-augustus-gene-93.36-mRNA-1              | NA       | Indica   | LRR-TM | Os5g0274500              | OsR498G0612087300.01.T01  | Somatic embryogenesis receptor kinase 1-like                                           |    |  |  |
| maker-7-augustus-gene-185.46-mRNA-1             | NA       | NA       | LRR-TM | Os07g0501800             | OsR498G0714373600.01.T01  | Receptor like protein 4                                                                |    |  |  |
| maker-7-augustus-gene-197.75-mRNA-1             | NA       | NA       | LRR-TM | 0                        | OsR498G0714448800.01.T02  | Patatin                                                                                |    |  |  |
| maker-7-augustus-gene-5.39-mRNA-1               | NA       | NA       | LRR-TM | Os07g0115400             |                           | LRR receptor-like serine/threonine-protein kinase FL52                                 |    |  |  |
| maker-8-augustus-gene-145.29-mRNA-1             | NA       | NA       | LRR-TM | Os08g0322500             | OsR498G0815772300.01.T01  | Putative LRR receptor-like serine/threonine-protein kinase                             |    |  |  |
| maker-8-augustus-gene-240.0-mRNA-1              | NA       | Indica   | LRR-TM | Os08g049900              | OsR498G0816398100.01.T01  | F-box protein At 8                                                                     |    |  |  |
| maker-11-augustus-gene-87.44-mRNA-1             | Indica   | NA       | NBS    | Os12g023800              |                           | Cytosin                                                                                |    |  |  |
| maker-1-augustus-gene-259.42-mRNA-1             | Japonica | Indica   | NBS    | Os12g0539800             | OsR498G0101591800.01.T01  |                                                                                        |    |  |  |
| maker-1-augustus-gene-325.2-mRNA-1              | Japonica | NA       | NBS    | Os1g01757400             | OsR498G0102022500.01.T02  | AAA domain-containing protein (Fragment)                                               |    |  |  |
| maker-11-augustus-gene-252.57-mRNA-1            | Japonica | Japonica | NBS    | Os11g064600              | OsR498G1120731800.01.T01  | NBS-LRR disease resistance protein homologue-like                                      |    |  |  |
| maker-4-augustus-gene-271.50-mRNA-1             | NA       | NA       | NBS    | Os4g0346000              | OsR498G040952200.01.T01   | Shikimate kinase                                                                       |    |  |  |
| maker-7-augustus-gene-229.43-mRNA-1             | Japonica | NA       | NBS    | Os07g053100              | OsR498G0714613100.01.T02  | Adenylyl-sulfate kinase                                                                |    |  |  |
| maker-8-augustus-gene-92.16-mRNA-1              | Japonica | NA       | NBS    |                          |                           | Resistance protein PSH-RGH6                                                            |    |  |  |
| augustus_masked-12-processed-gene-127.26-mRNA-1 | NA       | Japonica | NBS    | Os12g0409901             | OsR498G1221377600.01.T02  | ABC transporter domain-containing protein                                              |    |  |  |
| maker-11-augustus-gene-252.57-mRNA-1            | NA       | Japonica | NBS    | Os11g064600              | OsR498G1120731800.01.T01  | NBS-LRR disease resistance protein homologue-like                                      |    |  |  |
| maker-3-augustus-gene-401.26-mRNA-1             | NA       | NA       | NBS    | Os03g0670100             | OsR498G0306740000.01.T02  | Protein TRIGALACTOSYLDIACYLGLYCEROL 3 chloroplastic                                    |    |  |  |
| maker-8-augustus-gene-96.41-mRNA-1              | NA       | NA       | NBS    | Os08g016400              |                           | Disease resistance RPP13-like protein                                                  |    |  |  |
| augustus-8-processed-gene-189.5-mRNA-1          | Indica   | NA       | NBS-TM | Os08g037400              |                           | CC-NBS-LRR type disease resistance protein NLRI-V                                      |    |  |  |
| augustus_masked-11-processed-gene-253.37-mRNA-1 | Indica   | NA       | NBS-TM | Os11g064900              | OsR498G1120736800.01.T01  | NBS-LRR disease resistance protein homologue-like                                      |    |  |  |
| augustus_masked-6-processed-gene-102.3-mRNA-1   | Indica   | NA       | NBS-TM | Os11g064900              | OsR498G0612165700.01.T01  | Disease resistance protein RPM1                                                        |    |  |  |
| maker-1-augustus-gene-473.15-mRNA-1             | Indica   | NA       | NBS-TM | Os01g0911300             | OsR498G0102556000.01.T01  | ABC transporter B family member 26, chloroplastic                                      |    |  |  |
| maker-1-augustus-gene-142.50-mRNA-1             | Indica   | NA       | NBS-TM |                          |                           | Pollen signalling protein with adenylyl cyclase activity (Fragment)                    |    |  |  |
| maker-12-augustus-gene-256.3-mRNA-1             | Indica   | NA       | NBS-TM | Os12g0401200             | OsR498G1220503300.01.T04  | PRK domain-containing protein (Fragment)                                               |    |  |  |
| maker-2-augustus-gene-182.49-mRNA-1             | Indica   | NA       | NBS-TM |                          |                           | Disease resistance protein RGA2                                                        |    |  |  |
| maker-3-augustus-gene-301.25-mRNA-1             | Indica   | NA       | NBS-TM | Os10g0370100             |                           | calmodulin-binding transcription activator 3                                           |    |  |  |
| maker-3-augustus-gene-304.14-mRNA-1             | Indica   | NA       | NBS-TM |                          | OsR498G1018551100.01.T01  | NB-ARC domain containing protein, expressed                                            |    |  |  |
| maker-5-augustus-gene-75.42-mRNA-1              | Indica   | NA       | NBS-TM | Os5g0222200              | OsR498G0510052200.01.T01  | Eceriferum 5 (Fragment)                                                                |    |  |  |
| maker-6-augustus-gene-102.42-mRNA-1             | Indica   | NA       | NBS-TM |                          |                           | Disease resistance protein RPM1                                                        |    |  |  |
| maker-8-augustus-gene-60.12-mRNA-1              | Indica   | NA       | NBS-TM | Os08g0202400             | OsR498G0815386000.01.T02  | NB-ARC domain-containing protein                                                       |    |  |  |
| maker-9-augustus-gene-88.25-mRNA-1              | Indica   | NA       | NBS-TM |                          |                           | NBS-LRR protein (Fragment)                                                             |    |  |  |
| augustus-1-processed-gene-120.2-mRNA-1          | Japonica | NA       | NBS-TM |                          | OsR498G0100788500.01.T01  | NB-ARC domain-containing protein                                                       |    |  |  |
| augustus-1-processed-gene-345.2-mRNA-1          | Japonica | NA       | NBS-TM | Os10g0799100             | OsR498G10102814900.01.T02 | NB-ARC domain-containing protein                                                       | </ |  |  |

|                                                 |          |          |           |                           |                           |                                                                                    |                                    |
|-------------------------------------------------|----------|----------|-----------|---------------------------|---------------------------|------------------------------------------------------------------------------------|------------------------------------|
| maker-11-augustus-gene-225.3-mRNA-1             | Japanica | Indica   | NBS-TM    | Os07g0573100              | OsR498G1120588100.01.T01  | Adenylyl-sulfate kinase                                                            |                                    |
| maker-11-augustus-gene-253.1-mRNA-1             | Japanica | Indica   | NBS-TM    | Os11g0684100              | OsR498G1120735400.01.T01  | NBS-LRR disease resistance protein homologue-like                                  |                                    |
| maker-11-augustus-gene-37.17-mRNA-1             | Japanica | NA       | NBS-TM    | Os11g0184900              | OsR498G1119531400.01.T01  | NAC domain transcription factor                                                    |                                    |
| maker-11-augustus-gene-46.22-mRNA-1             | Japanica | Indica   | NBS-TM    | OsR498G1119768400.01.T01  | OsR498G1119768400.01.T01  | NB-ARC domain, putative                                                            |                                    |
| maker-11-augustus-gene-46.8-mRNA-1              | Japanica | Japanica | NBS-TM    | Os11g0266500              | OsR498G1119768700.01.T02  | Disease resistance protein RPM1                                                    |                                    |
| maker-11-augustus-gene-59.22-mRNA-1             | Japanica | NA       | NBS-TM    | OsR498G111970900.01.T04   | OsR498G111970900.01.T04   | Leucine Rich Repeat family protein, expressed                                      |                                    |
| maker-11-augustus-gene-7.73-mRNA-1              | Japanica | Indica   | NBS-TM    | Os08g0170200              | OsR498G1119365800.01.T01  | Disease resistance protein RPM1                                                    |                                    |
| maker-12-augustus-gene-197.0-mRNA-1             | Japanica | NA       | NBS-TM    | OsR498G1221658300.01.T01  | OsR498G1221658300.01.T01  | NB-ARC domain containing protein, expressed                                        |                                    |
| maker-12-augustus-gene-206.38-mRNA-1            | Japanica | NA       | NBS-TM    | Os12g0511400              | OsR498G1221703400.01.T01  | NB-ARC domain containing protein, expressed                                        |                                    |
| maker-12-augustus-gene-206.36-mRNA-1            | Japanica | NA       | NBS-TM    |                           |                           | NB-ARC domain containing protein, expressed                                        |                                    |
| maker-12-augustus-gene-207.37-mRNA-1            | Japanica | NA       | NBS-TM    |                           |                           | NB-ARC domain containing protein, expressed                                        |                                    |
| maker-12-augustus-gene-234.92-mRNA-1            | Japanica | NA       | NBS-TM    | Os12g0564800              | OsR498G1221892000.01.T02  | NB-ARC domain containing protein expressed                                         |                                    |
| maker-12-augustus-gene-36.0-mRNA-1              | Japanica | NA       | NBS-TM    | OsR498G1221011500.01.T01  | OsR498G1221011500.01.T01  | Disease resistance protein RPM1                                                    |                                    |
| maker-2-augustus-gene-127.48-mRNA-1             | Japanica | Indica   | NBS-TM    | Os02g0318500              | OsR498G203559000.01.T05   | PDR-type ABC transporter                                                           |                                    |
| maker-3-augustus-gene-450.0-mRNA-1              | Japanica | NA       | NBS-TM    | Os03g0755100              | OsR498G2030765300.01.T01  | Transporter associated with antigen processing protein 2                           |                                    |
| maker-3-augustus-gene-51.40-mRNA-1              | Japanica | Indica   | NBS-TM    | Os07g0573100              | OsR498G2030541400.01.T04  | Adenylyl-sulfate kinase                                                            |                                    |
| maker-3-augustus-gene-99.37-mRNA-1              | Japanica | NA       | NBS-TM    | OsR498G20305742500.01.T01 | OsR498G20305742500.01.T01 | Macro domain-containing protein                                                    |                                    |
| maker-4-augustus-gene-262.52-mRNA-1             | Japanica | Japanica | NBS-TM    | Os04g0621500              | OsR498G0409298500.01.T01  | NBS-type RGA protein (Fragment)                                                    |                                    |
| maker-5-augustus-gene-193.0-mRNA-1              | Japanica | NA       | NBS-TM    | Os05g0379500              | OsR498G0510726700.01.T05  | Powdery mildew resistance protein PM3 variant                                      |                                    |
| maker-5-augustus-gene-193.3-mRNA-1              | Japanica | NA       | NBS-TM    | Os05g0380300              | OsR498G0510726700.01.T05  | Powdery mildew resistance protein PM3                                              |                                    |
| maker-5-augustus-gene-246.48-mRNA-1             | Japanica | Japanica | NBS-TM    | Os05g0477000              | OsR498G0511050000.01.T01  | NBS-LRR disease resistance protein homologue-like                                  |                                    |
| maker-5-augustus-gene-86.6-mRNA-1               | Japanica | NA       | NBS-TM    | Os05g0240200              | OsR498G0510120000.01.T03  | TOPLLESS-related 1 isoform 2                                                       |                                    |
| maker-6-augustus-gene-102.42-mRNA-1             | Japanica | NA       | NBS-TM    |                           |                           | Disease resistance protein RPM1                                                    |                                    |
| maker-6-augustus-gene-102.49-mRNA-1             | Japanica | NA       | NBS-TM    |                           |                           | Disease resistance protein RPM1                                                    |                                    |
| maker-6-augustus-gene-194.39-mRNA-1             | Japanica | NA       | NBS-TM    |                           |                           | Disease resistance protein RPP13                                                   |                                    |
| maker-6-augustus-gene-249.57-mRNA-1             | Japanica | Japanica | NBS-TM    | Os06g0619000              | OsR498G0612961500.01.T01  | Putative disease resistance protein RGA3                                           |                                    |
| maker-6-augustus-gene-5.75-mRNA-1               | Japanica | NA       | NBS-TM    | Os06g0109400              | OsR498G0611490500.01.T01  | Cell division control protein C                                                    |                                    |
| maker-7-augustus-gene-42.45-mRNA-1              | Japanica | NA       | NBS-TM    | OsR498G0713654200.01.T01  | OsR498G0713654200.01.T01  | AAA domain-containing protein                                                      |                                    |
| maker-7-augustus-gene-97.8-mRNA-1               | Japanica | NA       | NBS-TM    |                           |                           | Putative disease resistance RPP13-like protein 1                                   |                                    |
| maker-8-augustus-gene-46.43-mRNA-1              | Japanica | NA       | NBS-TM    |                           |                           | Disease resistance RPP13-like protein 4                                            |                                    |
| maker-8-augustus-gene-60.12-mRNA-1              | Japanica | NA       | NBS-TM    | Os08g0203400              | OsR498G0815386000.01.T02  | NB-ARC domain-containing protein                                                   |                                    |
| maker-8-augustus-gene-85.10-mRNA-1              | Japanica | Indica   | NBS-TM    | Os08g0235600              | OsR498G0815501900.01.T01  | NB-ARC domain-containing protein                                                   |                                    |
| maker-9-augustus-gene-87.0-mRNA-1               | Japanica | NA       | NBS-TM    |                           |                           | NB-ARC domain-containing protein                                                   |                                    |
| augustus-1-processed-gene-244.17-mRNA-1         | NA       | NA       | NBS-TM    | 0                         | OsR498G0101487100.01.T01  | Disease resistance protein RPP13                                                   |                                    |
| augustus-1-processed-gene-407.14-mRNA-1         | NA       | NA       | NBS-TM    | Os01g0615500              | OsR498G0101542000.01.T01  | ATPase, coupled to transmembrane movement of substances                            |                                    |
| augustus-1-processed-gene-459.1-mRNA-1          | NA       | NA       | NBS-TM    | Os01g0615500              | OsR498G0101542000.01.T01  | ATPase, coupled to transmembrane movement of substances                            |                                    |
| augustus-11-processed-gene-208.33-mRNA-1        | NA       | NA       | NBS-TM    | Os11g0405100              | OsR498G11020735400.01.T01 | NB-ARC domain containing protein, expressed                                        |                                    |
| augustus-11-processed-gene-252.35-mRNA-1        | NA       | NA       | NBS-TM    | Os11g0684100              | OsR498G11120735400.01.T01 | NBS-LRR disease resistance protein homologue-like                                  |                                    |
| augustus-11-processed-gene-43.45-mRNA-1         | NA       | Japanica | NBS-TM    | Os11g0263000              | OsR498G1119746200.01.T02  | Similar to NBS-LRR disease resistance protein homologue                            |                                    |
| augustus-4-processed-gene-129.53-mRNA-1         | NA       | NA       | NBS-TM    | Os04g0375300              | OsR498G0408366900.01.T01  | NB-ARC domain-containing protein                                                   |                                    |
| augustus-4-processed-gene-130.56-mRNA-1         | NA       | NA       | NBS-TM    | 0                         | OsR498G0408382700.01.T01  | Disease resistance protein RGA2                                                    |                                    |
| augustus-7-processed-gene-28.9-mRNA-1           | NA       | NA       | NBS-TM    | Os07g0160300              | OsR498G0713563100.01.T01  | P-loop containing nucleoside triphosphate hydrolase                                |                                    |
| augustus-8-processed-gene-100.23-mRNA-1         | NA       | NA       | NBS-TM    | 0                         | OsR498G0815571800.01.T01  | Disease resistance protein RPM1                                                    |                                    |
| augustus-8-processed-gene-189.5-mRNA-1          | NA       | NA       | NBS-TM    | Os08g0373400              | OsR498G0815569000.01.T01  | CC-NBS-LRR type disease resistance protein NLR-V                                   |                                    |
| augustus-8-processed-gene-43.39-mRNA-1          | NA       | NA       | NBS-TM    |                           |                           | Disease resistance protein RPP13                                                   |                                    |
| augustus-8-processed-gene-99.30-mRNA-1          | NA       | NA       | NBS-TM    | Os08g0258700              | OsR498G0815569000.01.T01  | Nucleotide-binding leucine-rich-repeat protein 1                                   |                                    |
| augustus_masked-1-processed-gene-251.5-mRNA-1   | NA       | NA       | NBS-TM    | Os01g0615500              | OsR498G0101542000.01.T01  | ATPase, coupled to transmembrane movement of substances                            |                                    |
| augustus_masked-11-processed-gene-262.11-mRNA-1 | NA       | NA       | NBS-TM    | Os05g0230700              | OsR498G0510149400.01.T01  | NB-ARC domain, putative                                                            |                                    |
| augustus_masked-3-processed-gene-309.6-mRNA-1   | NA       | NA       | NBS-TM    |                           |                           | Disease resistance protein RPM1                                                    |                                    |
| augustus_masked-6-processed-gene-102.3-mRNA-1   | NA       | NA       | NBS-TM    | 0                         | OsR498G0612165700.01.T01  | Disease resistance protein RPM1                                                    |                                    |
| augustus_masked-6-processed-gene-182.21-mRNA-1  | NA       | Indica   | NBS-TM    | Os06g0503100              | OsR498G0612565500.01.T01  | ATPase, coupled to transmembrane movement of substances                            |                                    |
| augustus_masked-8-processed-gene-198.16-mRNA-1  | NA       | NA       | NBS-TM    | Os08g0388300              | OsR498G0815986100.01.T03  | NB-ARC domain containing protein, expressed                                        |                                    |
| maker-1-augustus-gene-414.45-mRNA-1             | NA       | NA       | NBS-TM    | 0                         | OsR498G0101487100.01.T01  | Mitochondrial import inner membrane translocase subunit                            |                                    |
| maker-1-augustus-gene-465.15-mRNA-1             | NA       | NA       | NBS-TM    | 0                         | OsR498G0101487100.01.T01  | Mitochondrial import inner membrane translocase subunit                            |                                    |
| maker-11-augustus-gene-253.1-mRNA-1             | NA       | Indica   | NBS-TM    | Os11g0684100              | OsR498G1120735400.01.T01  | NBS-LRR disease resistance protein homologue-like                                  |                                    |
| maker-12-augustus-gene-176.30-mRNA-1            | NA       | NA       | NBS-TM    |                           |                           | Putative NB-ARC domain-containing protein (Fragment)                               |                                    |
| maker-12-augustus-gene-197.0-mRNA-1             | NA       | NA       | NBS-TM    | 0                         | OsR498G1221658300.01.T01  | NB-ARC domain containing protein, expressed                                        |                                    |
| maker-12-augustus-gene-234.92-mRNA-1            | NA       | NA       | NBS-TM    | Os12g0564800              | OsR498G1221892000.01.T02  | NB-ARC domain containing protein expressed                                         |                                    |
| maker-2-augustus-gene-130.56-mRNA-1             | NA       | NA       | NBS-TM    |                           |                           | Putative disease resistance protein RGA4                                           |                                    |
| maker-3-augustus-gene-185.7-mRNA-1              | NA       | Indica   | NBS-TM    | Os07g0501500              | OsR498G0306409500.01.T01  | Disease resistance protein RPM1                                                    |                                    |
| maker-3-augustus-gene-251.24-mRNA-1             | NA       | Japanica | NBS-TM    | Os03g0599000              | OsR498G0306507000.01.T01  | Putative NBS-LRR type resistance protein                                           |                                    |
| maker-3-augustus-gene-301.25-mRNA-1             | NA       | NA       | NBS-TM    | Os10g0370100              | OsR498G1018551100.01.T01  | calmodulin-binding transcription activator 3                                       |                                    |
| maker-3-augustus-gene-304.14-mRNA-1             | NA       | NA       | NBS-TM    | 0                         | OsR498G1018551100.01.T01  | NB-ARC domain containing protein, expressed                                        |                                    |
| maker-4-augustus-gene-129.11-mRNA-1             | NA       | Indica   | NBS-TM    | Os04g0374175              | OsR498G0408366900.01.T02  | NB-ARC domain-containing protein                                                   |                                    |
| maker-4-augustus-gene-150.52-mRNA-1             | NA       | NA       | NBS-TM    | Os04g0413000              | OsR498G0408366900.01.T02  | ABC transporter B family member 29 chloroplastic                                   |                                    |
| maker-5-augustus-gene-193.0-mRNA-1              | NA       | NA       | NBS-TM    | Os05g0379500              | OsR498G0510726700.01.T05  | Powdery mildew resistance protein PM3 variant                                      |                                    |
| maker-5-augustus-gene-193.3-mRNA-1              | NA       | NA       | NBS-TM    | Os05g0380300              | OsR498G0510726700.01.T05  | Powdery mildew resistance protein PM3 variant                                      |                                    |
| maker-5-augustus-gene-75.42-mRNA-1              | NA       | NA       | NBS-TM    | Os05g0222200              | OsR498G0510052200.01.T01  | Eceriferum 5 (Fragment)                                                            |                                    |
| maker-5-augustus-gene-86.6-mRNA-1               | NA       | NA       | NBS-TM    | Os05g0240200              | OsR498G0510120000.01.T03  | TOPLLESS-related 1 isoform 2                                                       |                                    |
| maker-6-augustus-gene-101.22-mRNA-1             | NA       | NA       | NBS-TM    | Os06g0286500              | OsR498G0612159700.01.T03  | NBS-LRR disease resistance protein homologue                                       |                                    |
| maker-6-augustus-gene-102.42-mRNA-1             | NA       | NA       | NBS-TM    |                           |                           | Disease resistance protein RPM1                                                    |                                    |
| maker-6-augustus-gene-102.49-mRNA-1             | NA       | NA       | NBS-TM    | 0                         | OsR498G0612165900.01.T03  | Disease resistance protein RPM1                                                    |                                    |
| maker-6-augustus-gene-24.47-mRNA-1              | NA       | NA       | NBS-TM    | Os06g0146100              | OsR498G0611619900.01.T05  | NBS-LRR type R protein Pth-1                                                       |                                    |
| maker-6-augustus-gene-30.64-mRNA-1              | NA       | NA       | NBS-TM    | Os06g0158300              | OsR498G0611659900.01.T02  | Putative NB-ARC domain-containing protein (Fragment)                               |                                    |
| maker-6-augustus-gene-8.48-mRNA-1               | NA       | NA       | NBS-TM    | Os06g0114600              | OsR498G0611507900.01.T02  | Glucanase kinase                                                                   |                                    |
| maker-7-augustus-gene-242.53-mRNA-1             | NA       | NA       | NBS-TM    | Os07g0591900              | OsR498G0713654200.01.T01  | Penitricopeptide repeat                                                            |                                    |
| maker-8-augustus-gene-152.44-mRNA-1             | NA       | NA       | NBS-TM    |                           |                           | NBS-LRR disease resistance protein homologue (Fragment)                            |                                    |
| maker-8-augustus-gene-43.0-mRNA-1               | NA       | NA       | NBS-TM    | Os08g0170200              | OsR498G0815279900.01.T01  | Disease resistance protein RPP13                                                   |                                    |
| maker-9-augustus-gene-87.0-mRNA-1               | NA       | NA       | NBS-TM    |                           |                           | NB-ARC domain-containing protein                                                   |                                    |
| maker-9-augustus-gene-88.25-mRNA-1              | NA       | NA       | NBS-TM    |                           |                           | NBS-LRR protein (Fragment)                                                         |                                    |
| maker-10-augustus-gene-22.26-mRNA-1             | Japanica | Indica   | NBS-TM    | PIK, PIKM                 | Os11g0689100              | OsR498G1018095600.01.T01                                                           | Disease resistance protein Pks-2   |
| maker-11-augustus-gene-155.0-mRNA-1             | Japanica | Indica   | NBS-TM    | PIK, PIKM                 | Os11g0689100              | OsR498G1120737900.01.T02                                                           | Disease resistance protein Pks-2   |
| maker-6-augustus-gene-128.0-mRNA-1              | Japanica | NA       | NBS-TM    | PID3                      | Os06g0330100              | OsR498G0612165900.01.T03                                                           | Resistance protein (Fragment) PID3 |
| augustus_masked-12-processed-gene-108.24-mRNA-1 | Japanica | NA       | NBS-TM    | PITA                      | Os12g0281300              | OsR498G1221311800.01.T01                                                           | Blast resistance protein Pi-ta     |
| maker-8-augustus-gene-284.6-mRNA-1              | Japanica | Indica   | PtHB4     | Os08g0539700              | OsR498G0816550100.01.T01  | Brown planthopper resistance protein BPH1/9                                        |                                    |
| maker-12-augustus-gene-110.45-mRNA-1            | Japanica | Indica   | PTR       | Os12g0285100              | OsR498G1221322300.01.T01  | Disease resistance protein                                                         |                                    |
| maker-12-augustus-gene-111.26-mRNA-1            | Japanica | Japanica | PTR       | Os12g0285100              | OsR498G1221325200.01.T02  | Disease resistance protein (Fragment)                                              |                                    |
| augustus-1-processed-gene-30.34-mRNA-1          | Indica   | NA       | Kinase-TM | Os01g0155500              | OsR498G0100197900.01.T01  | Receptor-like protein kinase HERK 1                                                |                                    |
| augustus-1-processed-gene-8.3-mRNA-1            | Indica   | Japanica | Kinase-TM | Os01g0113650              | OsR498G0100044500.01.T01  | Putative receptor serine/threonine kinase PR5K                                     |                                    |
| augustus-10-processed-gene-1.21-mRNA-1          | Indica   | NA       | Kinase-TM | Os10g0101000              | OsR498G1017996700.01.T01  | Non-specific serine/threonine protein kinase                                       |                                    |
| augustus-2-processed-gene-33.34-mRNA-1          | Indica   | NA       | Kinase-TM | Os02g0161000              | OsR498G0203015000.01.T02  | Non-specific serine/threonine protein kinase                                       |                                    |
| augustus-4-processed-gene-154.23-mRNA-1         | Indica   | NA       | Kinase-TM | Os04g0428400              | OsR498G0408253300.01.T01  | Non-specific serine/threonine protein kinase (Fragment)                            |                                    |
| augustus-5-processed-gene-293.4-mRNA-1          | Indica   | NA       | Kinase-TM | Os05g0564000              | OsR498G0511355000.01.T05  | Mitogen-activated protein kinase                                                   |                                    |
| augustus-5-processed-gene-66.22-mRNA-1          | Indica   | Japanica | Kinase-TM | Os05g0208100              | OsR498G0616176500.01.T01  | Non-specific serine/threonine protein kinase                                       |                                    |
| augustus-7-processed-gene-12.18-mRNA-1          | Indica   | NA       | Kinase-TM | Os07g0130100              | OsR498G0713460400.01.T01  | L-type lectin-domain containing receptor kinase IV.2                               |                                    |
| augustus-7-processed-gene-12.19-mRNA-1          | Indica   | NA       | Kinase-TM | Os07g0130200              | OsR498G0713461200.01.T01  | Putative receptor kinase Leckr                                                     |                                    |
| augustus-7-processed-gene-12.20-mRNA-1          | Indica   | Japanica | Kinase-TM | Os07g0130300              | OsR498G0713999000.01.T01  | L-type lectin-domain containing receptor kinase IV.1                               |                                    |
| augustus-7-processed-gene-12.25-mRNA-1          | Indica   | NA       | Kinase-TM | Os07g0130800              | OsR498G0713462000.01.T01  | Putative receptor kinase Leckr                                                     |                                    |
| augustus-7-processed-gene-12.31-mRNA-1          | Indica   | NA       | Kinase-TM | Os07g0132150              | OsR498G0713464000.01.T01  | L-type lectin-domain containing receptor kinase IV.2                               |                                    |
| augustus-7-processed-gene-13.14-mRNA-1          | Indica   | NA       | Kinase-TM | OsR498G0713464300.01.T06  | OsR498G0713464300.01.T06  | Putative receptor-type protein kinase Lrk1                                         |                                    |
| augustus-7-processed-gene-13.27-mRNA-1          | Indica   | Indica   | Kinase-TM | Os07g0130200              | OsR498G0713465300.01.T01  | Putative receptor-type protein kinase Lrk1                                         |                                    |
| augustus-7-processed-gene-13.37-mRNA-1          | Indica   | Indica   | Kinase-TM | Os07g0133100              | OsR498G0713465800.01.T01  | Non-specific serine/threonine protein kinase                                       |                                    |
| augustus-7-processed-gene-181.23-mRNA-1         | Indica   | NA       | Kinase-TM | Os07g0493800              | OsR498G0714347500.01.T01  | Wall-associated protein kinase                                                     |                                    |
| augustus-7-processed-gene-200.7-mRNA-1          | Indica   | NA       | Kinase-TM |                           |                           | Receptor-like protein kinase                                                       |                                    |
| augustus_masked-1-processed-gene-8.12-mRNA-1    | Indica   | NA       | Kinase-TM | Os01g0113400              | OsR498G0100045000.01.T04  | Cysteine-rich receptor-like protein kinase 37                                      |                                    |
| augustus_masked-1-processed-gene-9.31-mRNA-1    | Indica   | Indica   | Kinase-TM | Os01g0117400              | OsR498G0100056600.01.T03  | Receptor-like kinase                                                               |                                    |
| augustus_masked-1-processed-gene-9.4-mRNA-1     | Indica   | NA       | Kinase-TM | Os01g0115700              | OsR498G0100051200.01.T01  | Receptor-like kinase                                                               |                                    |
| augustus_masked-10-processed-gene-148.16-mRNA-1 | Indica   | NA       | Kinase-TM | Os04g0103500              | OsR498G0407241200.01.T01  | G-type lectin 5-receptor-like serine/threonine-protein kinase                      |                                    |
| augustus_masked-10-processed-gene-5.20-mRNA-1   | Indica   | NA       | Kinase-TM | Os05g0104800              | OsR498G05101801400.01.T01 | Proline-rich receptor-like protein kinase FERK4                                    |                                    |
| augustus_masked-4-processed-gene-154.33-mRNA-1  | Indica   | Japanica | Kinase-TM | Os04g0429000              | OsR498G0408253300.01.T01  | Non-specific serine/threonine protein kinase (Fragment)                            |                                    |
| augustus_masked-4-processed-gene-22.27-mRNA-1   | Indica   | Indica   | Kinase-TM | Os04g0202350              | OsR498G0407718200.01.T01  | Non-specific serine/threonine protein kinase                                       |                                    |
| augustus_masked-5-processed-gene-161.9-mRNA-1   | Indica   | NA       | Kinase-TM | Os05g0332300              | OsR498G0510529300.01.T01  | Non-specific serine/threonine protein kinase                                       |                                    |
| augustus_masked-6-processed-gene-102.31-mRNA-1  | Indica   | NA       | Kinase-TM | Os06g0288100              | OsR498G0616127600.01.T01  | Leucine-rich repeat receptor-like serine/threonine/tyrosine protein kinase SOBIR 1 |                                    |
| augustus_masked-6-processed-gene-295.37-mRNA-1  | Indica   | NA       | Kinase-TM | Os06g0694000              | OsR498G0613249300.01.T03  | Mitogen-activated protein kinase                                                   |                                    |
| augustus_masked-6-processed-gene-57.46-mRNA-1   | Indica   | Japanica | Kinase-TM | Os06g0210400              | OsR498G1019094500.01.T01  | Mitogen-activated protein kinase kinase                                            |                                    |
| augustus_masked-8-processed-gene-228.11-mRNA-1  | Indica   | Indica   | Kinase-TM | Os08g0441100              | OsR498G0816176500.01.T01  | Non-specific serine/threonine protein kinase                                       |                                    |
| maker-1-augustus-gene-19.21-mRNA-1              | Indica   | NA       | Kinase-TM | Os01g0136800              | OsR498G0100126800.01.T01  | WAK2-OsWAK receptor-like cytoplasmic kinase (OsWAK-RLCK)                           |                                    |
| maker-1-augustus-gene-19.9-mRNA-1               | Indica   | NA       | Kinase-TM |                           |                           | Putative serine/threonine-protein kinase                                           |                                    |
| maker-1-augustus-gene-20.0-mRNA-1               | Indica   | NA       | Kinase-TM |                           |                           | Protein kinase domain-containing protein (Fragment)                                |                                    |
| maker-1-augustus-gene-20.13-mRNA-1              | Indica   | NA       | Kinase-TM |                           |                           | Putative receptor serine/threonine kinase PR5K                                     |                                    |
| maker-1-augustus-gene-20.13-mRNA-1              | Indica   | NA       | Kinase-TM |                           |                           | Putative receptor serine/threonine kinase PR5K                                     |                                    |
| maker-1-augustus-gene-20.18-mRNA-1              | Indica   | NA       | Kinase-TM |                           |                           | Protein kinase domain-containing protein (Fragment)                                |                                    |
| maker-1-augustus-gene-20.9-mRNA-1               | Indica   | NA       | Kinase-TM |                           |                           | Protein kinase domain-containing protein (Fragment)                                |                                    |
| maker-1-augustus-gene-21.2-mRNA-1               | Indica   | NA       | Kinase-TM | Os01g0138400              | OsR498G0100134300.01.T01  |                                                                                    |                                    |

|                                                 |          |          |           |                          |                                                     |                                                                                            |
|-------------------------------------------------|----------|----------|-----------|--------------------------|-----------------------------------------------------|--------------------------------------------------------------------------------------------|
| maker-1-augustus-gene-9.99-mRNA-1               | Indica   | Indica   | Kinase-TM | Os01g0116000             | OsR498G0100052000.01.T01                            | Serine/threonine protein kinase                                                            |
| maker-10-augustus-gene-127.46-mRNA-1            | Indica   | NA       | Kinase-TM | Os04g0141400             | OsR498G0407537100.01.T01                            | Putative receptor-type protein kinase LRK1                                                 |
| maker-10-augustus-gene-127.48-mRNA-1            | Indica   | NA       | Kinase-TM | Os04g0141200             | OsR498G0407534900.01.T01                            | Receptor-like serine/threonine protein kinase                                              |
| maker-10-augustus-gene-131.28-mRNA-1            | Indica   | NA       | Kinase-TM | Os04g0125700             | OsR498G0407519500.01.T01                            | Lectin-domain containing receptor kinase A4.3                                              |
| maker-10-augustus-gene-142.3-mRNA-1             | Indica   | NA       | Kinase-TM | Os01g0136400             | OsR498G0100125200.01.T04                            | Putative serine/threonine-protein kinase                                                   |
| maker-10-augustus-gene-145.10-mRNA-1            | Indica   | NA       | Kinase-TM | Os04g0109100             | OsR498G0407442600.01.T01                            | Non-specific serine/threonine protein kinase                                               |
| maker-10-augustus-gene-35.0-mRNA-1              | Indica   | NA       | Kinase-TM |                          |                                                     | Wall-associated receptor kinase 4                                                          |
| maker-10-augustus-gene-45.39-mRNA-1             | Indica   | Indica   | Kinase-TM | Os10g0174800             | OsR498G1018204400.01.T01                            | Wall-associated kinase                                                                     |
| maker-11-augustus-gene-256.34-mRNA-1            | Indica   | NA       | Kinase-TM | Os11g0495850             | OsR498G1120743300.01.T02                            | Wall-associated receptor kinase                                                            |
| maker-11-augustus-gene-256.35-mRNA-1            | Indica   | NA       | Kinase-TM |                          |                                                     | Putative inactive receptor kinase RLK902                                                   |
| maker-11-augustus-gene-74.11-mRNA-1             | Indica   | NA       | Kinase-TM | OsR498G1119612600.01.T01 | Protein kinase domain containing protein, expressed |                                                                                            |
| maker-12-augustus-gene-147.6-mRNA-1             | Indica   | NA       | Kinase-TM | Os12g0433500             | OsR498G1221451200.01.T03                            | serine/threonine-protein kinase TIO                                                        |
| maker-2-augustus-gene-126.0-mRNA-1              | Indica   | NA       | Kinase-TM | Os02g0513000             | OsR498G0203912300.01.T01                            | Serine/threonine-protein kinase PBS1                                                       |
| maker-2-augustus-gene-250.6-mRNA-1              | Indica   | Japonica | Kinase-TM | Os02g0632100             | OsR498G050984800.01.T02                             | Wall-associated receptor kinase 3                                                          |
| maker-2-augustus-gene-262.30-mRNA-1             | Indica   | NA       | Kinase-TM |                          |                                                     | Wall-associated receptor kinase 4                                                          |
| maker-2-augustus-gene-31.54-mRNA-1              | Indica   | NA       | Kinase-TM |                          |                                                     | L-type lectin-domain containing receptor kinase IX.2                                       |
| maker-2-augustus-gene-41.37-mRNA-1              | Indica   | NA       | Kinase-TM | Os02g0174200             | OsR498G0203068200.01.T01                            | serine/threonine-protein kinase STY13                                                      |
| maker-2-augustus-gene-46.50-mRNA-1              | Indica   | NA       | Kinase-TM |                          | OsR498G0203101600.01.T02                            | Phytosulfokine receptor                                                                    |
| maker-4-augustus-gene-126.0-mRNA-1              | Indica   | NA       | Kinase-TM |                          |                                                     | Protein kinase domain-containing protein (Fragment)                                        |
| maker-4-augustus-gene-205.9-mRNA-1              | Indica   | NA       | Kinase-TM | Os04g0517500             | OsR498G0408901300.01.T01                            | Phosphoenolpyruvate carboxylase kinase                                                     |
| maker-4-augustus-gene-255.7-mRNA-1              | Indica   | NA       | Kinase-TM | Os04g0608900             | OsR498G0409252600.01.T01                            | serine/threonine-protein kinase STY13                                                      |
| maker-4-augustus-gene-26.27-mRNA-1              | Indica   | Indica   | Kinase-TM | Os11g0692100             | OsR498G0407758000.01.T01                            | Bacterial blight resistance protein XA26                                                   |
| maker-4-augustus-gene-268.3-mRNA-1              | Indica   | NA       | Kinase-TM | Os04g0631800             | OsR498G0409332600.01.T02                            | Serine/threonine-protein kinase                                                            |
| maker-4-augustus-gene-268.39-mRNA-1             | Indica   | Japonica | Kinase-TM | Os04g0634000             | OsR498G0409338400.01.T01                            | G-type lectin 5-receptor-like serine/threonine protein kinase                              |
| maker-4-augustus-gene-268.7-mRNA-1              | Indica   | NA       | Kinase-TM | Os04g0632100             | OsR498G0409332800.01.T04                            | Non-specific serine/threonine protein kinase                                               |
| maker-4-augustus-gene-31.39-mRNA-1              | Indica   | Indica   | Kinase-TM | Os11g0492100             | OsR498G0407758000.01.T01                            | Receptor kinase MRKs                                                                       |
| maker-5-augustus-gene-188.44-mRNA-1             | Indica   | NA       | Kinase-TM |                          | OsR498G0510697600.01.T02                            | Receptor-like protein kinase ANKUR1                                                        |
| maker-5-augustus-gene-283.37-mRNA-1             | Indica   | NA       | Kinase-TM | Os05g0549100             | OsR498G0511289600.01.T01                            | Serine/threonine-protein kinase SNT7                                                       |
| maker-5-augustus-gene-284.29-mRNA-1             | Indica   | NA       | Kinase-TM |                          | OsR498G0511294500.01.T02                            | Wall-associated kinase                                                                     |
| maker-5-augustus-gene-289.59-mRNA-1             | Indica   | NA       | Kinase-TM | Os05g0560300             | OsR498G0511334000.01.T02                            | Protein MALE DISCOVERER 1                                                                  |
| maker-5-augustus-gene-298.40-mRNA-1             | Indica   | Indica   | Kinase-TM | Os05g0571600             | OsR498G0511392300.01.T01                            | Mitogen-activated protein kinase                                                           |
| maker-5-augustus-gene-298.59-mRNA-1             | Indica   | NA       | Kinase-TM | Os05g0577700             | OsR498G0511394600.01.T02                            | MAP kinase kinase Kinase5                                                                  |
| maker-5-augustus-gene-46.51-mRNA-1              | Indica   | NA       | Kinase-TM | Os05g0207500             | OsR498G0509991200.01.T01                            | Non-specific serine/threonine protein kinase                                               |
| maker-5-augustus-gene-66.56-mRNA-1              | Indica   | NA       | Kinase-TM | Os05g0207700             | OsR498G0509991800.01.T03                            | Serine/threonine-protein kinase CDL1                                                       |
| maker-5-augustus-gene-73.26-mRNA-1              | Indica   | Indica   | Kinase-TM | Os05g0227200             | OsR498G0510036200.01.T03                            | Receptor protein kinase PERK1                                                              |
| maker-6-augustus-gene-298.25-mRNA-1             | Indica   | NA       | Kinase-TM | Os06g0703000             | OsR498G0613265800.01.T01                            | Putative serine/threonine-protein kinase PBL17 isoform B                                   |
| maker-7-augustus-gene-12.52-mRNA-1              | Indica   | Indica   | Kinase-TM | Os07g0129800             | OsR498G0714538800.01.T01                            | Putative receptor kinase Leck3                                                             |
| maker-7-augustus-gene-12.54-mRNA-1              | Indica   | NA       | Kinase-TM | Os07g0131000             |                                                     | L-type lectin-domain containing receptor kinase IV.1                                       |
| maker-7-augustus-gene-189.51-mRNA-1             | Indica   | NA       | Kinase-TM | Os07g0507300             | OsR498G0714392600.01.T04                            | germinal center kinase 1 isoform X3                                                        |
| maker-7-augustus-gene-205.14-mRNA-1             | Indica   | NA       | Kinase-TM | Os07g0534700             | OsR498G0714497100.01.T02                            | Cysteine-rich receptor-like protein kinase 25                                              |
| maker-7-augustus-gene-205.9-mRNA-1              | Indica   | NA       | Kinase-TM |                          | OsR498G0714496300.01.T01                            | Receptor-like serine/threonine protein kinase                                              |
| maker-7-augustus-gene-206.10-mRNA-1             | Indica   | Indica   | Kinase-TM | Os07g0628700             | OsR498G0714502100.01.T01                            | Cystine-rich receptor-like protein kinase 8                                                |
| maker-7-augustus-gene-207.46-mRNA-1             | Indica   | NA       | Kinase-TM |                          | OsR498G0714502300.01.T01                            | Cystine-rich receptor-like protein kinase 8                                                |
| maker-7-augustus-gene-207.58-mRNA-1             | Indica   | NA       | Kinase-TM | Os07g0537900             | OsR498G0714507500.01.T01                            | Cysteine-rich receptor-like protein kinase 8                                               |
| maker-7-augustus-gene-207.71-mRNA-1             | Indica   | Indica   | Kinase-TM | Os07g0537900             | OsR498G0714504400.01.T04                            | Cysteine-rich receptor-like protein kinase 8                                               |
| maker-7-augustus-gene-208.36-mRNA-1             | Indica   | NA       | Kinase-TM | Os07g0541000             | OsR498G0714516300.01.T01                            | Receptor-like serine-threonine protein kinase                                              |
| maker-7-augustus-gene-209.0-mRNA-1              | Indica   | NA       | Kinase-TM | Os07g0541400             | OsR498G0714516900.01.T02                            | Cysteine-rich receptor kinase                                                              |
| maker-7-augustus-gene-209.11-mRNA-1             | Indica   | Indica   | Kinase-TM | Os07g0548800             | OsR498G0714515800.01.T01                            | Receptor-like serine/threonine protein kinase                                              |
| maker-7-augustus-gene-209.12-mRNA-1             | Indica   | NA       | Kinase-TM | Os07g0541000             | OsR498G0714516800.01.T01                            | Cysteine-rich receptor-like protein kinase 10                                              |
| maker-7-augustus-gene-209.21-mRNA-1             | Indica   | Indica   | Kinase-TM | Os07g0541500             | OsR498G0714517200.01.T02                            | Cysteine-rich receptor kinase                                                              |
| maker-7-augustus-gene-210.47-mRNA-1             | Indica   | NA       | Kinase-TM | Os07g0542400             | OsR498G0714519200.01.T05                            | Putative Zea mays retrotransposon Opie-2                                                   |
| maker-7-augustus-gene-28.45-mRNA-1              | Indica   | Indica   | Kinase-TM | Os07g0159700             | OsR498G0713558800.01.T01                            | Protein kinase domain-containing protein (Fragment)                                        |
| maker-8-augustus-gene-190.0-mRNA-1              | Indica   | Indica   | Kinase-TM | Os08g0374600             | OsR498G0815946800.01.T03                            | Cytokinin-regulated kinase-like                                                            |
| maker-9-augustus-gene-115.2-mRNA-1              | Indica   | NA       | Kinase-TM |                          |                                                     | Serine/threonine-specific receptor protein kinase-like                                     |
| maker-9-augustus-gene-117.3-mRNA-1              | Indica   | Indica   | Kinase-TM | Os09g0356800             | OsR498G0917240400.01.T05                            | Protein kinase domain-containing protein                                                   |
| maker-9-augustus-gene-145.39-mRNA-1             | Indica   | NA       | Kinase-TM | Os09g0408800             | OsR498G0917427900.01.T01                            | Cysteine-rich receptor-like protein kinase 10                                              |
| augustus-1-processed-gene-162.25-mRNA-1         | Japonica | Indica   | Kinase-TM | Os01g0384300             | OsR498G0101005100.01.T01                            | LRR receptor-like serine/threonine-protein kinase RKF3                                     |
| augustus-1-processed-gene-296.25-mRNA-1         | Japonica | Japonica | Kinase-TM | Os01g0699400             | OsR498G0101831600.01.T01                            | Mitogen-activated protein kinase kinase A                                                  |
| augustus-1-processed-gene-331.52-mRNA-1         | Japonica | NA       | Kinase-TM | Os01g0769700             | OsR498G0102465800.01.T04                            | Receptor-like protein kinase FERONIA                                                       |
| augustus-1-processed-gene-337.1-mRNA-1          | Japonica | NA       | Kinase-TM | Os01g0779300             | OsR498G0102097100.01.T01                            | Non-specific serine/threonine protein kinase                                               |
| augustus-1-processed-gene-339.2-mRNA-1          | Japonica | Japonica | Kinase-TM | Os01g0784200             | OsR498G0102109300.01.T01                            | Receptor-like serine/threonine-protein kinase                                              |
| augustus-1-processed-gene-339.4-mRNA-1          | Japonica | NA       | Kinase-TM | Os01g0784200             |                                                     | Non-specific serine/threonine protein kinase                                               |
| augustus-1-processed-gene-484.34-mRNA-1         | Japonica | NA       | Kinase-TM | Os01g0927500             | OsR498G0102625300.01.T03                            | Inactive leucine-rich repeat receptor-like protein kinase CORYNE                           |
| augustus-1-processed-gene-68.14-mRNA-1          | Japonica | NA       | Kinase-TM | Os01g0223900             | OsR498G0100448100.01.T01                            | Non-specific serine/threonine protein kinase (Fragment)                                    |
| augustus-10-processed-gene-111.2-mRNA-1         | Japonica | Indica   | Kinase-TM | Os01g0442000             | OsR498G0101878100.01.T01                            | Putative receptor-type protein kinase LRK1                                                 |
| augustus-10-processed-gene-35.7-mRNA-1          | Japonica | Indica   | Kinase-TM | Os01g0511100             | OsR498G0101583200.01.T01                            | Wall-associated kinase                                                                     |
| augustus-11-processed-gene-119.2-mRNA-1         | Japonica | NA       | Kinase-TM | Os01g0441900             | OsR498G1120029400.01.T01                            | G-type lectin 5-receptor-like serine/threonine-protein kinase                              |
| augustus-11-processed-gene-121.11-mRNA-1        | Japonica | NA       | Kinase-TM | Os01g0445300             | OsR498G1120050700.01.T01                            | Brassinosteroid insensitive 1-associated receptor kinase 1                                 |
| augustus-11-processed-gene-182.37-mRNA-1        | Japonica | NA       | Kinase-TM | Os01g0517500             | OsR498G1120348700.01.T01                            | Proline-rich receptor-like protein kinase PERK14                                           |
| augustus-11-processed-gene-206.17-mRNA-1        | Japonica | Japonica | Kinase-TM | Os01g0661500             | OsR498G1120470500.01.T01                            | Putative serine/threonine-specific protein kinase                                          |
| augustus-11-processed-gene-8.16-mRNA-1          | Japonica | Indica   | Kinase-TM | Os01g0130300             | OsR498G1119321900.01.T01                            | Receptor-like serine/threonine-protein kinase                                              |
| augustus-12-processed-gene-167.8-mRNA-1         | Japonica | Japonica | Kinase-TM | Os01g0548800             | OsR498G1221536100.01.T01                            | Histidine kinase2                                                                          |
| augustus-12-processed-gene-260.18-mRNA-1        | Japonica | Japonica | Kinase-TM | Os01g0608500             | OsR498G1222080600.01.T01                            | Lectin protein kinase, putative, expressed                                                 |
| augustus-12-processed-gene-264.32-mRNA-1        | Japonica | NA       | Kinase-TM | Os01g0614600             | OsR498G1222101900.01.T01                            | Protein kinase PINOID                                                                      |
| augustus-12-processed-gene-264.34-mRNA-1        | Japonica | Indica   | Kinase-TM | Os01g0615300             | OsR498G1222102900.01.T01                            | Wall-associated receptor kinase 5                                                          |
| augustus-12-processed-gene-264.46-mRNA-1        | Japonica | NA       | Kinase-TM | Os01g0615300             | OsR498G1222104500.01.T04                            | Wall-associated receptor kinase 5                                                          |
| augustus-12-processed-gene-41.13-mRNA-1         | Japonica | NA       | Kinase-TM |                          | OsR498G1220411100.01.T01                            | Non-specific serine/threonine protein kinase                                               |
| augustus-2-processed-gene-114.14-mRNA-1         | Japonica | Indica   | Kinase-TM | Os02g0298200             | OsR498G0203485500.01.T01                            | Putative receptor-type protein kinase LRK1                                                 |
| augustus-2-processed-gene-115.18-mRNA-1         | Japonica | Indica   | Kinase-TM | Os02g0298200             | OsR498G0203485500.01.T01                            | Putative receptor-type protein kinase LRK1                                                 |
| augustus-2-processed-gene-156.10-mRNA-1         | Japonica | NA       | Kinase-TM | Os02g0459600             | OsR498G0203737300.01.T03                            | Non-specific serine/threonine protein kinase                                               |
| augustus-2-processed-gene-218.61-mRNA-1         | Japonica | NA       | Kinase-TM | Os02g0565500             | OsR498G0204133200.01.T01                            | Tyrosine protein kinase                                                                    |
| augustus-2-processed-gene-238.26-mRNA-1         | Japonica | NA       | Kinase-TM | Os02g0603000             | OsR498G0204253800.01.T01                            | Serine/threonine-protein kinase ONK1                                                       |
| augustus-2-processed-gene-265.58-mRNA-1         | Japonica | NA       | Kinase-TM | Os02g0640500             | OsR498G0204399600.01.T01                            | L-type lectin-domain containing receptor kinase IV.2                                       |
| augustus-2-processed-gene-359.68-mRNA-1         | Japonica | NA       | Kinase-TM | Os02g0767400             | OsR498G0204832400.01.T01                            | Non-specific serine/threonine protein kinase                                               |
| augustus-2-processed-gene-52.12-mRNA-1          | Japonica | NA       | Kinase-TM |                          | OsR498G0203139900.01.T01                            | Proline-rich receptor-like protein kinase PERK9 (Fragment)                                 |
| augustus-3-processed-gene-491.56-mRNA-1         | Japonica | NA       | Kinase-TM |                          |                                                     | probable receptor-like serine/threonine-protein kinase                                     |
| augustus-4-processed-gene-268.79-mRNA-1         | Japonica | Japonica | Kinase-TM | Os04g0633800             | OsR498G0409334600.01.T02                            | Non-specific serine/threonine protein kinase                                               |
| augustus-4-processed-gene-278.43-mRNA-1         | Japonica | Indica   | Kinase-TM | Os04g0635000             | OsR498G0409498100.01.T01                            | Serine/threonine-protein kinase                                                            |
| augustus-4-processed-gene-295.1-mRNA-1          | Japonica | Indica   | Kinase-TM | Os04g0684200             | OsR498G0409514300.01.T06                            | CASP-like protein 1                                                                        |
| augustus-4-processed-gene-82.4-mRNA-1           | Japonica | Japonica | Kinase-TM | Os04g0307900             | OsR498G0408016900.01.T01                            | Wall-associated receptor kinase 5                                                          |
| augustus-4-processed-gene-82.5-mRNA-1           | Japonica | NA       | Kinase-TM |                          |                                                     | Wall-associated receptor kinase 3                                                          |
| augustus-5-processed-gene-152.17-mRNA-1         | Japonica | NA       | Kinase-TM |                          | OsR498G0510479400.01.T04                            | Receptor-like protein kinase FERONIA                                                       |
| augustus-5-processed-gene-152.19-mRNA-1         | Japonica | Japonica | Kinase-TM | Os05g0318700             | OsR498G0510486400.01.T01                            | Receptor-like protein kinase FERONIA                                                       |
| augustus-6-processed-gene-291.18-mRNA-1         | Japonica | NA       | Kinase-TM | Os06g0493200             | OsR498G0613227500.01.T01                            | probable receptor-like serine/threonine-protein kinase At5g57670                           |
| augustus-7-processed-gene-104.13-mRNA-1         | Japonica | NA       | Kinase-TM | Os07g0283050             | OsR498G0713999000.01.T01                            | Putative receptor-type protein kinase LRK1                                                 |
| augustus-7-processed-gene-216.6-mRNA-1          | Japonica | NA       | Kinase-TM | Os07g0147600             | OsR498G0713511000.01.T02                            | Mitogen-activated protein kinase kinase                                                    |
| augustus-7-processed-gene-216.33-mRNA-1         | Japonica | Japonica | Kinase-TM | Os07g0553633             | OsR498G0714550000.01.T01                            | Non-specific serine/threonine protein kinase (Fragment)                                    |
| augustus-7-processed-gene-226.3-mRNA-1          | Japonica | Japonica | Kinase-TM | Os07g0698800             | OsR498G0714602900.01.T01                            | L-type lectin-domain containing receptor kinase IX.1                                       |
| augustus-7-processed-gene-230.27-mRNA-1         | Japonica | NA       | Kinase-TM | Os07g0756000             | OsR498G0714629400.01.T01                            | Putative receptor-type protein kinase LRK1                                                 |
| augustus-7-processed-gene-230.47-mRNA-1         | Japonica | NA       | Kinase-TM | Os07g0575700             | OsR498G0714621000.01.T01                            | Lectin receptor-type kinase                                                                |
| augustus-7-processed-gene-230.48-mRNA-1         | Japonica | Indica   | Kinase-TM | Os07g0575700             | OsR498G0714621200.01.T01                            | Lectin receptor-type kinase                                                                |
| augustus-7-processed-gene-41.40-mRNA-1          | Japonica | Japonica | Kinase-TM | Os07g0186200             | OsR498G0713651200.01.T01                            | Non-specific serine/threonine protein kinase (Fragment)                                    |
| augustus-8-processed-gene-14.24-mRNA-1          | Japonica | Japonica | Kinase-TM | Os08g0124100             | OsR498G0815098200.01.T02                            | Putative receptor-type protein kinase LRK1                                                 |
| augustus-8-processed-gene-153.14-mRNA-1         | Japonica | NA       | Kinase-TM |                          | OsR498G0815308800.01.T01                            | Putative glycerophosphodiester phosphodiesterase, protein kinase RLK-Pelle-LRK10L-2 family |
| augustus-9-processed-gene-230.3-mRNA-1          | Japonica | NA       | Kinase-TM | Os09g0571200             | OsR498G091537900.01.T01                             | Receptor-like receptor-like kinase 3                                                       |
| augustus-9-processed-gene-44.19-mRNA-1          | Japonica | Japonica | Kinase-TM | Os09g0251250             | OsR498G0916836300.01.T01                            | Serine/threonine-protein kinase                                                            |
| augustus_masked-1-processed-gene-280.18-mRNA-1  | Japonica | Japonica | Kinase-TM | Os01g0668600             | OsR498G0101726500.01.T01                            | Serine/threonine-protein kinase                                                            |
| augustus_masked-1-processed-gene-280.20-mRNA-1  | Japonica | NA       | Kinase-TM | Os01g0669100             | OsR498G0101727800.01.T01                            | Non-specific serine/threonine protein kinase                                               |
| augustus_masked-1-processed-gene-281.23-mRNA-1  | Japonica | NA       | Kinase-TM | Os01g0670100             | OsR498G0101730000.01.T01                            | Non-specific serine/threonine protein kinase                                               |
| augustus_masked-1-processed-gene-326.20-mRNA-1  | Japonica | NA       | Kinase-TM | Os01g0759200             | OsR498G0102036200.01.T01                            | Non-specific serine/threonine protein kinase                                               |
| augustus_masked-1-processed-gene-326.21-mRNA-1  | Japonica | NA       | Kinase-TM | Os01g0759400             | OsR498G0102036400.01.T01                            | Non-specific serine/threonine protein kinase                                               |
| augustus_masked-1-processed-gene-68.24-mRNA-1   | Japonica | Japonica | Kinase-TM | Os01g0223700             | OsR498G0100448000.01.T02                            | Non-specific serine/threonine protein kinase (Fragment)                                    |
| augustus_masked-1-processed-gene-68.25-mRNA-1   | Japonica | Indica   | Kinase-TM | Os01g0224000             | OsR498G0100448100.01.T01                            | Non-specific serine/threonine protein kinase (Fragment)                                    |
| augustus_masked-11-processed-gene-181.7-mRNA-1  | Japonica | NA       | Kinase-TM | Os10g0152000             | OsR498G1018157400.01.T01                            | Wall-associated receptor kinase 2                                                          |
| augustus_masked-11-processed-gene-182.79-mRNA-1 | Japonica | NA       | Kinase-TM | Os11g0553500             | OsR498G1120341600.01.T01                            | Wall-associated receptor kinase 3                                                          |
| augustus_masked-11-processed-gene-71.36-mRNA-1  | Japonica | Indica   | Kinase-TM | Os11g0554800             |                                                     | Wall-associated receptor kinase 1                                                          |
| augustus_masked-11-processed-gene-8.106-mRNA-1  | Japonica | NA       | Kinase-TM | Os04g0103700             | OsR498G111958200.01.T01                             | Non-specific serine/threonine protein kinase (Fragment)                                    |
| augustus_masked-11-processed-gene-8.108-mRNA-1  | Japonica | NA       | Kinase-TM | Os11g0133100             | OsR498G1119372000.01.T01                            | Receptor-like serine/threonine-protein kinase                                              |
| augustus_masked-11-processed-gene-8.108-mRNA-1  | Japonica | NA       |           |                          |                                                     |                                                                                            |



|                                                |          |          |           |                            |                            |                                                                                   |
|------------------------------------------------|----------|----------|-----------|----------------------------|----------------------------|-----------------------------------------------------------------------------------|
| augustus_masked-4-processed-gene-78.23-mRNA-1  | Japonica | Japonica | Kinase-TM | Os04g0303300               | OsR498G0407999200.01.T01   | Receptor-like serine/threonine-protein kinase                                     |
| augustus_masked-4-processed-gene-81.46-mRNA-1  | Japonica | NA       | Kinase-TM | Os04g0307500               | OsR498G0408014500.01.T02   | Wall-associated receptor kinase 1                                                 |
| augustus_masked-5-processed-gene-14.15-mRNA-1  | Japonica | NA       | Kinase-TM | Os05g0125200               | OsR498G0509464500.01.T01   | Receptor-like kinase LIP2                                                         |
| augustus_masked-5-processed-gene-15.21-mRNA-1  | Japonica | NA       | Kinase-TM | OsR498G0509654700.01.T01   | OsR498G0509654700.01.T01   | Serine/threonine-protein kinase-like protein CCR3                                 |
| augustus_masked-5-processed-gene-266.19-mRNA-1 | Japonica | NA       | Kinase-TM | Os05g0514200               | OsR498G0511175300.01.T02   | Non-specific serine/threonine protein kinase                                      |
| augustus_masked-5-processed-gene-269.37-mRNA-1 | Japonica | NA       | Kinase-TM | Os05g0519200               | OsR498G0511194100.01.T05   | Serine/threonine protein kinase                                                   |
| augustus_masked-5-processed-gene-302.32-mRNA-1 | Japonica | Japonica | Kinase-TM | Os05g0585800               | OsR498G0511562800.01.T03   | Mitogen-activated protein kinase kinase kinase 7                                  |
| augustus_masked-5-processed-gene-36.15-mRNA-1  | Japonica | NA       | Kinase-TM | OsR498G0509796100.01.T01   | OsR498G0509796100.01.T01   | Receptor-like protein kinase HERK 1                                               |
| augustus_masked-6-processed-gene-238.19-mRNA-1 | Japonica | NA       | Kinase-TM | Os04g0602500               | OsR498G041189400.01.T01    | Non-specific serine/threonine protein kinase                                      |
| augustus_masked-6-processed-gene-261.17-mRNA-1 | Japonica | NA       | Kinase-TM | Os04g0639500               | OsR498G0613036700.01.T01   | E3 ubiquitin-protein ligase KEG                                                   |
| augustus_masked-6-processed-gene-4.4-mRNA-1    | Japonica | NA       | Kinase-TM | OsR498G0611477400.01.T01   | OsR498G0611477400.01.T01   | Receptor-like serine/threonine-protein kinase                                     |
| augustus_masked-6-processed-gene-47.12-mRNA-1  | Japonica | Japonica | Kinase-TM | Os06g0191300               | OsR498G0204966600.01.T01   | MAP kinase kinase                                                                 |
| augustus_masked-6-processed-gene-262.27-mRNA-1 | Japonica | Japonica | Kinase-TM | Os06g0504800               | OsR498G0917178500.01.T01   | Serine/threonine-protein kinase UCNL                                              |
| augustus_masked-6-processed-gene-5.49-mRNA-1   | Japonica | NA       | Kinase-TM | Os06g098800                | OsR498G0150515500.01.T01   | Serine/threonine-protein kinase-like protein CCR4                                 |
| augustus_masked-9-processed-gene-188.10-mRNA-1 | Japonica | NA       | Kinase-TM | Os07g0486700               | OsR498G0917178500.01.T01   | Serine/threonine-protein kinase UCNL                                              |
| augustus_masked-9-processed-gene-55.25-mRNA-1  | Japonica | Indica   | Kinase-TM | Os07g0283125               | OsR498G0916878900.01.T01   | Lectin-domain containing receptor kinase A4.2                                     |
| maker-1-augustus-gene-107.29-mRNA-1            | Japonica | NA       | Kinase-TM | Os01g0292200               | OsR498G0100720500.01.T01   | Non-specific serine/threonine protein kinase                                      |
| maker-1-augustus-gene-109.26-mRNA-1            | Japonica | NA       | Kinase-TM | Os01g0296000               | OsR498G0100728600.01.T01   | Putative LRR receptor-like serine/threonine-protein kinase                        |
| maker-1-augustus-gene-109.5-mRNA-1             | Japonica | NA       | Kinase-TM | Os01g0296100               | OsR498G0100728700.01.T04   | Non-specific serine/threonine protein kinase                                      |
| maker-1-augustus-gene-118.0-mRNA-1             | Japonica | Japonica | Kinase-TM | Os01g0310400               | OsR498G0100776900.01.T03   | Wall-associated receptor kinase 5                                                 |
| maker-1-augustus-gene-118.6-mRNA-1             | Japonica | Indica   | Kinase-TM | Os01g0310400               | OsR498G0100778100.01.T02   | PT11-like tyrosine-protein kinase 3                                               |
| maker-1-augustus-gene-124.2-mRNA-1             | Japonica | NA       | Kinase-TM | Os01g0323000               | OsR498G0100818500.01.T02   | Serine/threonine protein kinase                                                   |
| maker-1-augustus-gene-125.7-mRNA-1             | Japonica | NA       | Kinase-TM | Os01g0323100               | OsR498G0100818800.01.T01   | Pto-interacting protein 1                                                         |
| maker-1-augustus-gene-150.40-mRNA-1            | Japonica | NA       | Kinase-TM | Os01g0364800               | OsR498G0100956900.01.T01   | Wall-associated receptor kinase                                                   |
| maker-1-augustus-gene-225.4-mRNA-1             | Japonica | NA       | Kinase-TM | Os01g058400                | OsR498G0101248800.01.T01   | Receptor-like kinase TMK3                                                         |
| maker-1-augustus-gene-236.9-mRNA-1             | Japonica | NA       | Kinase-TM | Os01g0587400               | OsR498G0101248800.01.T01   | Receptor-like serine/threonine-protein kinase                                     |
| maker-1-augustus-gene-258.10-mRNA-1            | Japonica | NA       | Kinase-TM | Os01g0629900               | OsR498G0101587800.01.T02   | Mitogen-activated protein kinase                                                  |
| maker-1-augustus-gene-259.33-mRNA-1            | Japonica | NA       | Kinase-TM | Os01g0631700               | OsR498G0101594500.01.T03   | Receptor-like protein kinase                                                      |
| maker-1-augustus-gene-264.49-mRNA-1            | Japonica | NA       | Kinase-TM | Os01g0641000               | OsR498G0101624900.01.T01   | Serine/threonine-protein kinase STY8                                              |
| maker-1-augustus-gene-277.80-mRNA-1            | Japonica | NA       | Kinase-TM | Os01g0664200               | OsR498G0101706400.01.T01   | Putative serine/threonine-protein kinase                                          |
| maker-1-augustus-gene-278.40-mRNA-1            | Japonica | NA       | Kinase-TM | Os01g0665200               | OsR498G0101709700.01.T01   | Mitogen-activated protein kinase                                                  |
| maker-1-augustus-gene-291.26-mRNA-1            | Japonica | Indica   | Kinase-TM | Os01g0689900               | OsR498G0101799400.01.T01   | Wall-associated receptor-like kinase 2                                            |
| maker-1-augustus-gene-292.1-mRNA-1             | Japonica | NA       | Kinase-TM | Os01g0690800               | OsR498G0101800500.01.T01   | Protein kinase domain-containing protein (Fragment)                               |
| maker-1-augustus-gene-292.4-mRNA-1             | Japonica | NA       | Kinase-TM | Os01g0690800               | OsR498G0101800900.01.T01   | Acidic endochitinase                                                              |
| maker-1-augustus-gene-3.26-mRNA-1              | Japonica | NA       | Kinase-TM | Os01g0104000               | OsR498G0100015400.01.T01   | C-type lectin receptor-like tyrosine-protein kinase                               |
| maker-1-augustus-gene-301.40-mRNA-1            | Japonica | NA       | Kinase-TM | Os01g0709500               | OsR498G0101865600.01.T04   | Receptor-like serine/threonine protein kinase ALE2                                |
| maker-1-augustus-gene-315.36-mRNA-1            | Japonica | NA       | Kinase-TM | Os01g0738300               | OsR498G0101860100.01.T01   | Proline-rich receptor-like protein kinase PERK10 isoform A                        |
| maker-1-augustus-gene-316.24-mRNA-1            | Japonica | NA       | Kinase-TM | Os01g0741200               | OsR498G0101596900.01.T01   | Putative serine/threonine-protein kinase RLCKVII                                  |
| maker-1-augustus-gene-319.46-mRNA-1            | Japonica | NA       | Kinase-TM | Os01g0747400               | OsR498G0101987200.01.T01   | Serine/threonine-protein kinase HT1                                               |
| maker-1-augustus-gene-321.19-mRNA-1            | Japonica | NA       | Kinase-TM | Os01g0750600               | OsR498G0102002200.01.T01   | proline-rich receptor-like protein kinase PERK5                                   |
| maker-1-augustus-gene-339.39-mRNA-1            | Japonica | Japonica | Kinase-TM | Os01g0783800               | OsR498G0102108700.01.T06   | G-type lectin 5-receptor-like serine/threonine-protein kinase                     |
| maker-1-augustus-gene-339.42-mRNA-1            | Japonica | NA       | Kinase-TM | Os01g0783800               | OsR498G0102108700.01.T06   | Serine/threonine-protein kinase                                                   |
| maker-1-augustus-gene-339.61-mRNA-1            | Japonica | Japonica | Kinase-TM | Os01g0784700               | OsR498G0102110200.01.T01   | Serine/threonine-protein kinase                                                   |
| maker-1-augustus-gene-483.51-mRNA-1            | Japonica | Indica   | Kinase-TM | Os03g0349200               | OsR498G0102619200.01.T01   | probable serine/threonine-protein kinase AT1g54610                                |
| maker-1-augustus-gene-485.26-mRNA-1            | Japonica | NA       | Kinase-TM | OsR498G0102632300.01.T02   | OsR498G0102632300.01.T02   | proline-rich receptor-like protein kinase PERK3 isoform X2                        |
| maker-1-augustus-gene-488.53-mRNA-1            | Japonica | Indica   | Kinase-TM | Os01g0935800               | OsR498G0102655400.01.T01   | Receptor-like protein kinase ANXUR1                                               |
| maker-1-augustus-gene-5.48-mRNA-1              | Japonica | NA       | Kinase-TM | Os01g0935800               | OsR498G0102655400.01.T01   | Serine/threonine protein kinase                                                   |
| maker-1-augustus-gene-503.3-mRNA-1             | Japonica | Japonica | Kinase-TM | Os01g0973500               | OsR498G0102780200.01.T01   | Receptor-like serine/threonine-protein kinase catalytic domain-containing protein |
| maker-1-augustus-gene-507.39-mRNA-1            | Japonica | NA       | Kinase-TM | Os01g0973500               | OsR498G0102780200.01.T01   | Receptor-like cytoplasmic kinase L76                                              |
| maker-1-augustus-gene-55.18-mRNA-1             | Japonica | NA       | Kinase-TM | Os01g0201200               | OsR498G0100357200.01.T04   | Serine/threonine-protein kinase                                                   |
| maker-1-augustus-gene-6.31-mRNA-1              | Japonica | NA       | Kinase-TM | Os01g0110500               | OsR498G0100034200.01.T01   | Proline-rich receptor-like protein kinase PERK8                                   |
| maker-1-augustus-gene-71.33-mRNA-1             | Japonica | NA       | Kinase-TM | Os01g0227200               | OsR498G0100467900.01.T01   | Receptor protein kinase PERK1                                                     |
| maker-1-augustus-gene-74.47-mRNA-1             | Japonica | NA       | Kinase-TM | Os01g0233800               | OsR498G0100489900.01.T01   | Serine/threonine-protein kinase                                                   |
| maker-10-augustus-gene-205.30-mRNA-1           | Japonica | NA       | Kinase-TM | Os04g0429000               | OsR498G0101844400.01.T03   | Serine/threonine protein kinase                                                   |
| maker-10-augustus-gene-127.41-mRNA-1           | Japonica | NA       | Kinase-TM | Os04g0125700               | OsR498G0007534800.01.T01   | Non-specific serine/threonine protein kinase                                      |
| maker-10-augustus-gene-142.3-mRNA-1            | Japonica | NA       | Kinase-TM | Os01g0136400               | OsR498G0100125200.01.T04   | Putative serine/threonine-protein kinase                                          |
| maker-10-augustus-gene-168.44-mRNA-1           | Japonica | NA       | Kinase-TM | Os01g0476100               | OsR498G0101889700.01.T01   | serine/threonine-protein kinase trimeric isoform X1                               |
| maker-10-augustus-gene-174.0-mRNA-1            | Japonica | Indica   | Kinase-TM | Os01g0483400               | OsR498G01120115000.01.T01  | Protein kinase domain containing protein, expressed                               |
| maker-10-augustus-gene-181.34-mRNA-1           | Japonica | NA       | Kinase-TM | Os01g0497600               | OsR498G0102049300.01.T01   | Putative serine/threonine-protein kinase                                          |
| maker-10-augustus-gene-192.47-mRNA-1           | Japonica | NA       | Kinase-TM | Os01g0518800               | OsR498G01019051100.01.T01  | Protein kinase domain containing protein, expressed                               |
| maker-10-augustus-gene-193.26-mRNA-1           | Japonica | NA       | Kinase-TM | Os01g0521700               | OsR498G0101906000.01.T01   | Non-specific serine/threonine protein kinase                                      |
| maker-10-augustus-gene-25.33-mRNA-1            | Japonica | Japonica | Kinase-TM | Os01g0136500               | OsR498G01018109100.01.T04  | Protein kinase domain containing protein, expressed                               |
| maker-10-augustus-gene-34.11-mRNA-1            | Japonica | Japonica | Kinase-TM | Os01g0151100               | OsR498G01018157400.01.T01  | Wall-associated receptor kinase 2                                                 |
| maker-10-augustus-gene-35.0-mRNA-1             | Japonica | NA       | Kinase-TM | Os01g0174800               | OsR498G0101820400.01.T01   | Wall-associated receptor kinase 4                                                 |
| maker-10-augustus-gene-43.39-mRNA-1            | Japonica | Japonica | Kinase-TM | Os01g0174800               | OsR498G0101820400.01.T01   | Wall associated kinase                                                            |
| maker-10-augustus-gene-43.42-mRNA-1            | Japonica | NA       | Kinase-TM | Os01g0136600               | OsR498G0101982300.01.T01   | Wall associated kinase                                                            |
| maker-11-augustus-gene-10.6-mRNA-1             | Japonica | NA       | Kinase-TM | Os01g0136600               | OsR498G0101982300.01.T01   | Calcium-dependent protein kinase                                                  |
| maker-11-augustus-gene-123.43-mRNA-1           | Japonica | NA       | Kinase-TM | Os01g0136600               | OsR498G01120059900.01.T01  | probable serine/threonine-protein kinase PBL28                                    |
| maker-11-augustus-gene-123.48-mRNA-1           | Japonica | NA       | Kinase-TM | Os01g0136600               | OsR498G01120059900.01.T01  | Putative serine/threonine-protein kinase WNK9 (Fragment)                          |
| maker-11-augustus-gene-125.35-mRNA-1           | Japonica | Indica   | Kinase-TM | Os01g070200                | OsR498G01120115000.01.T01  | Protein kinase domain containing protein, expressed                               |
| maker-11-augustus-gene-16.16-mRNA-1            | Japonica | Japonica | Kinase-TM | Os01g050700                | OsR498G01119421300.01.T01  | Serine/threonine-protein kinase D6PKL2                                            |
| maker-11-augustus-gene-185.0-mRNA-1            | Japonica | NA       | Kinase-TM | Os01g0553300               | OsR498G01120370600.01.T01  | Wall-associated receptor kinase 2                                                 |
| maker-11-augustus-gene-215.0-mRNA-1            | Japonica | NA       | Kinase-TM | Os01g0616100               | OsR498G01120510900.01.T01  | Leucine-rich repeat receptor protein kinase EX5                                   |
| maker-11-augustus-gene-216.34-mRNA-1           | Japonica | NA       | Kinase-TM | Os01g0616100               | OsR498G01120517600.01.T01  | Protein kinase domain-containing protein                                          |
| maker-11-augustus-gene-216.36-mRNA-1           | Japonica | NA       | Kinase-TM | Os01g0616100               | OsR498G01120517800.01.T01  | Protein kinase domain containing protein, expressed                               |
| maker-11-augustus-gene-244.49-mRNA-1           | Japonica | NA       | Kinase-TM | Os01g0616100               | OsR498G01120517800.01.T01  | Cytokinin-regulated kinase-like                                                   |
| maker-11-augustus-gene-245.48-mRNA-1           | Japonica | NA       | Kinase-TM | Os01g0616100               | OsR498G01120517800.01.T01  | Protein kinase domain containing protein, expressed                               |
| maker-11-augustus-gene-245.56-mRNA-1           | Japonica | NA       | Kinase-TM | Os01g0616100               | OsR498G01120517800.01.T01  | G-type lectin 5-receptor-like serine/threonine-protein kinase                     |
| maker-11-augustus-gene-251.40-mRNA-1           | Japonica | NA       | Kinase-TM | OsR498G01120726800.01.T02  | OsR498G01120726800.01.T02  | Receptor protein kinase-like                                                      |
| maker-11-augustus-gene-256.34-mRNA-1           | Japonica | NA       | Kinase-TM | Os01g0695850               | OsR498G01120743300.01.T02  | Wall-associated receptor kinase                                                   |
| maker-11-augustus-gene-256.35-mRNA-1           | Japonica | NA       | Kinase-TM | Os01g0695850               | OsR498G01120743300.01.T02  | Putative inactive receptor kinase RLK902                                          |
| maker-11-augustus-gene-28.42-mRNA-1            | Japonica | Japonica | Kinase-TM | Os02g0194400               | OsR498G01119480300.01.T01  | Leucine-rich repeat receptor protein kinase MSL1                                  |
| maker-11-augustus-gene-49.33-mRNA-1            | Japonica | Indica   | Kinase-TM | Os01g0271100               | OsR498G0111979200.01.T06   | Mitogen-activated protein kinase                                                  |
| maker-11-augustus-gene-62.7-mRNA-1             | Japonica | NA       | Kinase-TM | Os01g0194900               | OsR498G01119551000.01.T02  | Protein kinase domain-containing protein                                          |
| maker-11-augustus-gene-70.39-mRNA-1            | Japonica | Indica   | Kinase-TM | Os01g0207200               | OsR498G01119591700.01.T01  | Mitogen-activated protein kinase kinase kinase 3                                  |
| maker-11-augustus-gene-71.9-mRNA-1             | Japonica | Indica   | Kinase-TM | Os07g0186200               | OsR498G01119598200.01.T01  | Serine/threonine-protein kinase                                                   |
| maker-11-augustus-gene-75.2-mRNA-1             | Japonica | NA       | Kinase-TM | OsR498G01119613600.01.T01  | OsR498G01119613600.01.T01  | Customer beta subunit, putative                                                   |
| maker-11-augustus-gene-75.8-mRNA-1             | Japonica | Japonica | Kinase-TM | OsR498G01119614000.01.T02  | OsR498G01119614000.01.T02  | Putative mitogen-activated protein (MAP) kinase kinase kinase Ste11, Cryptococcus |
| maker-11-augustus-gene-9.0-mRNA-1              | Japonica | NA       | Kinase-TM | Os01g0312200               | OsR498G01119377100.01.T07  | Non-specific serine/threonine protein kinase                                      |
| maker-11-augustus-gene-90.9-mRNA-1             | Japonica | NA       | Kinase-TM | Os01g0242500               | OsR498G01119688900.01.T03  | Cyclin-dependent kinase C                                                         |
| maker-12-augustus-gene-1.5-mRNA-1              | Japonica | NA       | Kinase-TM | Os01g0312200               | OsR498G01119377100.01.T07  | Nonphototropic hypocotyl C1                                                       |
| maker-12-augustus-gene-15.46-mRNA-1            | Japonica | NA       | Kinase-TM | Os01g0312200               | OsR498G01119377100.01.T07  | Receptor-like serine/threonine-protein kinase                                     |
| maker-12-augustus-gene-16.0-mRNA-1             | Japonica | NA       | Kinase-TM | Os01g0312200               | OsR498G01119377100.01.T07  | Non-specific serine/threonine-protein kinase                                      |
| maker-12-augustus-gene-17.34-mRNA-1            | Japonica | Japonica | Kinase-TM | Os01g0312200               | OsR498G01119377100.01.T07  | Calcium-dependent protein kinase                                                  |
| maker-12-augustus-gene-190.35-mRNA-1           | Japonica | Japonica | Kinase-TM | Os01g0486900               | OsR498G01121633900.01.T01  | Receptor-like serine/threonine-protein kinase ALE2 isoform X2                     |
| maker-12-augustus-gene-252.9-mRNA-1            | Japonica | NA       | Kinase-TM | Os01g0594300               | OsR498G01122027100.01.T01  | Serine/threonine-protein kinase CTR1                                              |
| maker-12-augustus-gene-253.0-mRNA-1            | Japonica | NA       | Kinase-TM | Os01g0595800               | OsR498G01122032500.01.T02  | Wall-associated receptor kinase-like 14                                           |
| maker-12-augustus-gene-26.35-mRNA-1            | Japonica | Japonica | Kinase-TM | Os01g0497000               | OsR498G01119421300.01.T01  | Serine/threonine-protein kinase D6PKL2                                            |
| maker-12-augustus-gene-249.61-mRNA-1           | Japonica | Japonica | Kinase-TM | Os01g0497000               | OsR498G01119421300.01.T01  | C-type lectin domain containing receptor kinase IX.1                              |
| maker-12-augustus-gene-260.63-mRNA-1           | Japonica | Japonica | Kinase-TM | Os01g0497000               | OsR498G01122081400.01.T02  | Wall-associated receptor kinase-like 21                                           |
| maker-12-augustus-gene-261.18-mRNA-1           | Japonica | Indica   | Kinase-TM | Os01g0611100               | OsR498G011220806800.01.T03 | Serine/threonine-protein kinase receptor                                          |
| maker-12-augustus-gene-264.0-mRNA-1            | Japonica | Japonica | Kinase-TM | Os01g0615000               | OsR498G011222103900.01.T01 | Wall-associated receptor kinase 3                                                 |
| maker-12-augustus-gene-264.3-mRNA-1            | Japonica | NA       | Kinase-TM | Os01g0615000               | OsR498G011222103900.01.T01 | Wall-associated receptor kinase 5                                                 |
| maker-12-augustus-gene-268.14-mRNA-1           | Japonica | NA       | Kinase-TM | Os01g0621500               | OsR498G011222131900.01.T03 | Probable serine/threonine-protein kinase IREH1 isoform X1                         |
| maker-12-augustus-gene-3.77-mRNA-1             | Japonica | NA       | Kinase-TM | Os01g0621500               | OsR498G011222131900.01.T03 | Putative LRR receptor-like serine/threonine-protein kinase MRH1-like              |
| maker-12-augustus-gene-34.19-mRNA-1            | Japonica | NA       | Kinase-TM | OsR498G011221004600.01.T02 | OsR498G011221004600.01.T02 | Serine/threonine-protein kinase STY46                                             |
| maker-12-augustus-gene-42.18-mRNA-1            | Japonica | NA       | Kinase-TM | OsR498G011221046200.01.T01 | OsR498G011221046200.01.T01 | Protein kinase protein with adenine nucleotide alpha hydrolase-like domain        |
| maker-12-augustus-gene-43.8-mRNA-1             | Japonica | NA       | Kinase-TM | OsR498G011221046200.01.T01 | OsR498G011221046200.01.T01 | Protein kinase protein with adenine nucleotide alpha hydrolase-like domain        |
| maker-12-augustus-gene-5.18-mRNA-1             | Japonica | NA       | Kinase-TM | Os01g0108100               | OsR498G011220806200.01.T01 | Putative serine/threonine-protein kinase                                          |
| maker-12-augustus-gene-56.4-mRNA-1             | Japonica | NA       | Kinase-TM | Os01g0124500               | OsR498G01119688900.01.T03  | Serine/threonine-protein kinase                                                   |
| maker-12-augustus-gene-85.4-mRNA-1             | Japonica | Japonica | Kinase-TM | Os01g0248000               | OsR498G011221217600.01.T01 | Interleukin 1 receptor-associated kinase 4                                        |
| maker-12-augustus-gene-86.0-mRNA-1             | Japonica | Indica   | Kinase-TM | Os01g0249900               | OsR498G011221164600.01.T01 | Protein kinase domain-containing protein                                          |

|                                    |          |          |           |              |                           |                                                                            |
|------------------------------------|----------|----------|-----------|--------------|---------------------------|----------------------------------------------------------------------------|
| maker-2-agustus-gene-385.47-mRNA-1 | Japonica | NA       | Kinase-TM |              | OsR498G020506800.01.T01   | Aarf domain-containing kinase                                              |
| maker-2-agustus-gene-43.67-mRNA-1  | Japonica | NA       | Kinase-TM | Os02g0178000 | OsR498G0203083200.01.T03  | Non-specific serine/threonine protein kinase                               |
| maker-2-agustus-gene-52.43-mRNA-1  | Japonica | NA       | Kinase-TM | Os02g0194600 | OsR498G0203145700.01.T02  | Putative STRUBELLIG family receptor protein kinase                         |
| maker-2-agustus-gene-6.44-mRNA-1   | Japonica | NA       | Kinase-TM |              | OsR498G0202833400.01.T05  | Receptor-like serine/threonine protein kinase NCRK                         |
| maker-2-agustus-gene-6.52-mRNA-1   | Japonica | Japonica | Kinase-TM | Os02g0111600 | OsR498G0202835200.01.T02  | Wall-associated receptor kinase 5                                          |
| maker-2-agustus-gene-68.16-mRNA-1  | Japonica | NA       | Kinase-TM |              | OsR498G020233800.01.T02   | (Rice Genome Annotation Project) MAP3K delta-1 protein kinase              |
| maker-2-agustus-gene-79.10-mRNA-1  | Japonica | NA       | Kinase-TM | Os02g0232600 | OsR498G0203300400.01.T01  | Non-specific serine/threonine protein kinase                               |
| maker-2-agustus-gene-81.8-mRNA-1   | Japonica | NA       | Kinase-TM | Os02g0241600 | OsR498G0203312300.01.T01  | Serine/threonine protein kinase EDR1                                       |
| maker-2-agustus-gene-91.25-mRNA-1  | Japonica | NA       | Kinase-TM | Os01g0711200 | OsR498G0101783000.01.T01  | Putative leucine-rich repeat receptor-like protein kinase                  |
| maker-3-agustus-gene-10.20-mRNA-1  | Japonica | NA       | Kinase-TM | Os03g0122000 | OsR498G0305141900.01.T02  | Serine/threonine-protein kinase ATG1a                                      |
| maker-3-agustus-gene-100.19-mRNA-1 | Japonica | NA       | Kinase-TM | Os03g0242800 | OsR498G0305747600.01.T01  | Putative LRR receptor-like serine/threonine-protein kinase MRH1            |
| maker-3-agustus-gene-101.30-mRNA-1 | Japonica | NA       | Kinase-TM | Os03g0295600 | OsR498G0305749600.01.T01  | Serine/threonine-protein kinase STY46                                      |
| maker-3-agustus-gene-113.44-mRNA-1 | Japonica | NA       | Kinase-TM | Os03g0319400 | OsR498G0305833000.01.T03  | CB1-interacting protein kinase                                             |
| maker-3-agustus-gene-12.18-mRNA-1  | Japonica | Indica   | Kinase-TM | Os03g0331500 | OsR498G0305155100.01.T01  | probable serine/threonine protein kinase At1g01540                         |
| maker-3-agustus-gene-126.57-mRNA-1 | Japonica | NA       | Kinase-TM | Os10g0571300 | OsR498G1019232500.01.T01  | probable serine/threonine-protein kinase At4g35230                         |
| maker-3-agustus-gene-13.17-mRNA-1  | Japonica | Indica   | Kinase-TM | Os11g0134300 | OsR498G0305158600.01.T04  | Non-specific serine/threonine protein kinase                               |
| maker-3-agustus-gene-131.90-mRNA-1 | Japonica | NA       | Kinase-TM |              |                           | Cyclin-dependent kinase E                                                  |
| maker-3-agustus-gene-135.46-mRNA-1 | Japonica | Japonica | Kinase-TM | Os10g0533150 | OsR498G0305155100.01.T01  | Protein kinase domain containing protein, expressed                        |
| maker-3-agustus-gene-138.0-mRNA-1  | Japonica | NA       | Kinase-TM | Os10g0539600 | OsR498G1019112100.01.T04  | Calcium-dependent protein kinase isoform 1                                 |
| maker-3-agustus-gene-14.0-mRNA-1   | Japonica | NA       | Kinase-TM | Os03g0128700 | OsR498G0305164700.01.T02  | Calcium-dependent protein kinase                                           |
| maker-3-agustus-gene-140.5-mRNA-1  | Japonica | Indica   | Kinase-TM | Os03g0132800 | OsR498G10191215100.01.T01 | Serine/threonine-protein kinase BSK1-2                                     |
| maker-3-agustus-gene-15.13-mRNA-1  | Japonica | NA       | Kinase-TM | Os03g0130900 | OsR498G0305172900.01.T01  | Putative serine/threonine-protein kinase PBL21                             |
| maker-3-agustus-gene-177.10-mRNA-1 | Japonica | NA       | Kinase-TM | Os03g0364400 | OsR498G0306001300.01.T01  | probable serine/threonine-protein kinase PBL15                             |
| maker-3-agustus-gene-178.12-mRNA-1 | Japonica | NA       | Kinase-TM | Os03g0366200 | OsR498G0306008700.01.T02  | Calcium/calmodulin-dependent serine/threonine protein kinase 1             |
| maker-3-agustus-gene-191.31-mRNA-1 | Japonica | NA       | Kinase-TM | Os03g0390200 | OsR498G0306085400.01.T01  | Serine/threonine-protein kinase SRZC                                       |
| maker-3-agustus-gene-214.24-mRNA-1 | Japonica | NA       | Kinase-TM | Os03g0424200 | OsR498G0306238100.01.T04  | Y-box domain-containing protein                                            |
| maker-3-agustus-gene-214.49-mRNA-1 | Japonica | NA       | Kinase-TM | Os03g0424200 | OsR498G0306240800.01.T02  | Y-box domain-containing protein 32                                         |
| maker-3-agustus-gene-278.24-mRNA-1 | Japonica | NA       | Kinase-TM | Os10g0405100 | OsR498G1018676700.01.T05  | probable serine/threonine-protein kinase PBL3                              |
| maker-3-agustus-gene-29.65-mRNA-1  | Japonica | NA       | Kinase-TM | Os03g0160100 | OsR498G0305260500.01.T01  | Serine/threonine-protein kinase EDR1                                       |
| maker-3-agustus-gene-3.4-mRNA-1    | Japonica | Indica   | Kinase-TM | Os03g0118400 | OsR498G0305096900.01.T04  | Cell division control protein A                                            |
| maker-3-agustus-gene-325.29-mRNA-1 | Japonica | NA       | Kinase-TM | Os03g0329700 | OsR498G1018459800.01.T01  | Receptor-like serine/threonine protein kinase                              |
| maker-3-agustus-gene-327.30-mRNA-1 | Japonica | NA       | Kinase-TM | Os10g0327000 | OsR498G1018494900.01.T02  | Receptor-like serine/threonine protein kinase                              |
| maker-3-agustus-gene-342.3-mRNA-1  | Japonica | NA       | Kinase-TM | Os03g0568800 | OsR498G0306402700.01.T01  | Proline-rich receptor-like protein kinase PERK13                           |
| maker-3-agustus-gene-380.27-mRNA-1 | Japonica | Indica   | Kinase-TM | Os12g0640700 | OsR498G0306621200.01.T01  | Serine/threonine-protein kinase Nek2                                       |
| maker-3-agustus-gene-384.43-mRNA-1 | Japonica | NA       | Kinase-TM |              | OsR498G0306653000.01.T01  | Wall-associated receptor kinase 5                                          |
| maker-3-agustus-gene-385.45-mRNA-1 | Japonica | NA       | Kinase-TM | Os03g0643250 |                           | Phosphonate metabolism protein, putative                                   |
| maker-3-agustus-gene-39.11-mRNA-1  | Japonica | NA       | Kinase-TM | Os03g0715100 | OsR498G0305326300.01.T01  | Serine/threonine-protein kinase RPKP                                       |
| maker-3-agustus-gene-420.19-mRNA-1 | Japonica | NA       | Kinase-TM | Os03g0703400 | OsR498G0306885800.01.T03  | Mitogen-activated protein kinase kinase kinase 1                           |
| maker-3-agustus-gene-420.9-mRNA-1  | Japonica | Indica   | Kinase-TM | Os03g0704400 | OsR498G0306887900.01.T01  | Serine/threonine-protein kinase mph1                                       |
| maker-3-agustus-gene-424.23-mRNA-1 | Japonica | NA       | Kinase-TM | Os03g0711300 | OsR498G0306914200.01.T02  | Serine/threonine-protein kinase gri2                                       |
| maker-3-agustus-gene-425.62-mRNA-1 | Japonica | NA       | Kinase-TM | Os03g0711800 | OsR498G0306916400.01.T04  | probable serine/threonine protein kinase IREH1                             |
| maker-3-agustus-gene-429.46-mRNA-1 | Japonica | NA       | Kinase-TM | Os03g0719850 | OsR498G0306945400.01.T01  | Serine/threonine domain containing protein                                 |
| maker-3-agustus-gene-449.11-mRNA-1 | Japonica | NA       | Kinase-TM | Os03g0735000 | OsR498G03070345100.01.T01 | Serine/threonine-protein kinase dsl1                                       |
| maker-3-agustus-gene-453.37-mRNA-1 | Japonica | Indica   | Kinase-TM | Os07g0114400 | OsR498G0307088600.01.T01  | Casein kinase II alpha subunit                                             |
| maker-3-agustus-gene-454.22-mRNA-1 | Japonica | NA       | Kinase-TM | Os03g0764300 | OsR498G0307097600.01.T02  | Mitogen-activated protein kinase kinase kinase 5                           |
| maker-3-agustus-gene-454.4-mRNA-1  | Japonica | NA       | Kinase-TM | Os03g0763000 | OsR498G0307094500.01.T01  | Casein kinase II subunit alpha                                             |
| maker-3-agustus-gene-455.0-mRNA-1  | Japonica | NA       | Kinase-TM | Os03g0764800 | OsR498G0307099900.01.T01  | Serine/threonine-protein kinase SAPK8                                      |
| maker-3-agustus-gene-460.80-mRNA-1 | Japonica | NA       | Kinase-TM | Os03g0771800 | OsR498G0307138400.01.T01  | Proline-rich receptor-like protein kinase PERK4                            |
| maker-3-agustus-gene-480.25-mRNA-1 | Japonica | Indica   | Kinase-TM | Os03g0816100 | OsR498G0307269400.01.T01  | Non-specific lipid-transfer protein-like isoform 1                         |
| maker-3-agustus-gene-485.0-mRNA-1  | Japonica | Indica   | Kinase-TM | Os03g0825300 | OsR498G0307301100.01.T01  | Putative serine/threonine-protein kinase BSK3                              |
| maker-3-agustus-gene-491.22-mRNA-1 | Japonica | NA       | Kinase-TM | Os03g0839900 | OsR498G0307344800.01.T01  | Protein kinase protein with adenine nucleotide alpha hydrolase-like domain |
| maker-3-agustus-gene-494.32-mRNA-1 | Japonica | NA       | Kinase-TM | Os03g0847600 | OsR498G0307365500.01.T05  | Serine/threonine protein kinase                                            |
| maker-3-agustus-gene-5.37-mRNA-1   | Japonica | NA       | Kinase-TM | Os03g0113000 | OsR498G0305110000.01.T01  | Receptor protein kinase GINKYL4                                            |
| maker-3-agustus-gene-5.49-mRNA-1   | Japonica | NA       | Kinase-TM | Os03g0207300 | OsR498G0305432000.01.T01  | Protein kinase CK2 alpha chain                                             |
| maker-3-agustus-gene-64.25-mRNA-1  | Japonica | NA       | Kinase-TM |              | OsR498G0305491900.01.T01  | Proline-rich receptor-like protein kinase PERK4 isoform A                  |
| maker-3-agustus-gene-64.4-mRNA-1   | Japonica | NA       | Kinase-TM | Os03g0225700 | OsR498G0305488100.01.T01  | Wall-associated receptor kinase                                            |
| maker-3-agustus-gene-64.8-mRNA-1   | Japonica | NA       | Kinase-TM | Os03g0226300 | OsR498G0305489900.01.T01  | Pto kinase interactor                                                      |
| maker-3-agustus-gene-65.20-mRNA-1  | Japonica | NA       | Kinase-TM | Os03g0227900 | OsR498G0305497400.01.T02  | probable serine/threonine-protein kinase At1g01540                         |
| maker-3-agustus-gene-73.25-mRNA-1  | Japonica | NA       | Kinase-TM |              | OsR498G0305498000.01.T01  | Serine/threonine-protein kinase RPKP-like isoform X1                       |
| maker-3-agustus-gene-8.0-mRNA-1    | Japonica | NA       | Kinase-TM | Os03g0118400 | OsR498G0305126900.01.T01  | Cell division control protein A                                            |
| maker-3-agustus-gene-83.13-mRNA-1  | Japonica | NA       | Kinase-TM |              | OsR498G0305621000.01.T02  | MAP kinase kinase kinase10                                                 |
| maker-3-agustus-gene-86.49-mRNA-1  | Japonica | NA       | Kinase-TM |              | OsR498G0305644000.01.T04  | Serine/threonine-protein kinase ATG1c isoform C                            |
| maker-3-agustus-gene-87.18-mRNA-1  | Japonica | NA       | Kinase-TM | Os03g0293000 | OsR498G0305649000.01.T01  | Serine/threonine-protein kinase                                            |
| maker-3-agustus-gene-9.19-mRNA-1   | Japonica | NA       | Kinase-TM | Os03g0285800 | OsR498G0305716200.01.T01  | Mitogen-activated protein kinase                                           |
| maker-4-agustus-gene-123.1-mRNA-1  | Japonica | Indica   | Kinase-TM | Os04g0364000 | OsR498G0409532800.01.T02  | Calcium binding EGF domain containing protein, expressed                   |
| maker-4-agustus-gene-124.35-mRNA-1 | Japonica | NA       | Kinase-TM | Os04g0368000 | OsR498G0408337400.01.T01  | Wall-associated receptor kinase 2                                          |
| maker-4-agustus-gene-139.33-mRNA-1 | Japonica | NA       | Kinase-TM | Os04g0393900 | OsR498G0408485500.01.T01  | Serine/threonine-protein kinase NAK                                        |
| maker-4-agustus-gene-159.60-mRNA-1 | Japonica | Indica   | Kinase-TM | Os04g0430000 | OsR498G0408585300.01.T02  | probable serine/threonine-protein kinase At1g01540                         |
| maker-4-agustus-gene-159.68-mRNA-1 | Japonica | Indica   | Kinase-TM | Os04g0430400 | OsR498G0408586700.01.T01  | Protein kinase domain-containing protein                                   |
| maker-4-agustus-gene-160.11-mRNA-1 | Japonica | NA       | Kinase-TM | Os04g0452000 | OsR498G0408595100.01.T01  | Serine/threonine-protein kinase SAPK7                                      |
| maker-4-agustus-gene-174.80-mRNA-1 | Japonica | Indica   | Kinase-TM | Os04g0472700 | OsR498G0407704500.01.T02  | Cysteine-rich receptor-like protein kinase 6                               |
| maker-4-agustus-gene-19.50-mRNA-1  | Japonica | Indica   | Kinase-TM | Os04g0472000 | OsR498G0407709800.01.T01  | Cysteine-rich receptor-like protein kinase 6                               |
| maker-4-agustus-gene-191.39-mRNA-1 | Japonica | NA       | Kinase-TM | Os04g0488700 | OsR498G0408802200.01.T01  | Serine/threonine-protein kinase OX1                                        |
| maker-4-agustus-gene-201.39-mRNA-1 | Japonica | NA       | Kinase-TM |              | OsR498G0408871500.01.T01  | Receptor-like serine/threonine-protein kinase ale2                         |
| maker-4-agustus-gene-220.0-mRNA-1  | Japonica | NA       | Kinase-TM | Os04g0546300 | OsR498G0409018300.01.T01  | Serine/threonine-protein kinase D6PKL1                                     |
| maker-4-agustus-gene-221.65-mRNA-1 | Japonica | Indica   | Kinase-TM | Os04g0558800 | OsR498G0409565800.01.T02  | Putative leucine-rich repeat receptor-like protein kinase family protein   |
| maker-4-agustus-gene-242.17-mRNA-1 | Japonica | Indica   | Kinase-TM | Os04g0580500 | OsR498G0409144800.01.T01  | Clade VII lectin receptor kinase                                           |
| maker-4-agustus-gene-242.4-mRNA-1  | Japonica | Indica   | Kinase-TM | Os04g0584600 | OsR498G0409166900.01.T02  | Calcium-dependent protein kinase                                           |
| maker-4-agustus-gene-248.40-mRNA-1 | Japonica | NA       | Kinase-TM | Os04g0598600 |                           | Wall-associated kinase                                                     |
| maker-4-agustus-gene-248.42-mRNA-1 | Japonica | NA       | Kinase-TM | Os04g0598800 | OsR498G0409215700.01.T01  | Wall-associated receptor kinase-like 22 (Fragment)                         |
| maker-4-agustus-gene-248.50-mRNA-1 | Japonica | NA       | Kinase-TM | Os04g0599000 | OsR498G0409216600.01.T02  | Wall-associated kinase                                                     |
| maker-4-agustus-gene-254.39-mRNA-1 | Japonica | NA       | Kinase-TM | Os04g0619900 | OsR498G0409261700.01.T03  | Serine/threonine-protein kinase CTR1                                       |
| maker-4-agustus-gene-259.35-mRNA-1 | Japonica | NA       | Kinase-TM | Os04g0616600 | OsR498G0409282400.01.T01  | Leucine-rich repeat transmembrane protein kinase                           |
| maker-4-agustus-gene-261.12-mRNA-1 | Japonica | NA       | Kinase-TM | Os04g0619400 | OsR498G0409292800.01.T02  | Serine/threonine-protein kinase receptor                                   |
| maker-4-agustus-gene-268.0-mRNA-1  | Japonica | Indica   | Kinase-TM | Os04g0633800 | OsR498G0409337500.01.T02  | Serine/threonine-protein kinase                                            |
| maker-4-agustus-gene-268.22-mRNA-1 | Japonica | Indica   | Kinase-TM | Os04g0632700 | OsR498G0409334800.01.T01  | Serine/threonine-protein kinase                                            |
| maker-4-agustus-gene-268.25-mRNA-1 | Japonica | Japonica | Kinase-TM | Os04g0636200 | OsR498G0409335600.01.T01  | Non-specific serine/threonine protein kinase                               |
| maker-4-agustus-gene-268.8-mRNA-1  | Japonica | NA       | Kinase-TM | Os04g0631300 | OsR498G0409334300.01.T01  | Non-specific serine/threonine protein kinase                               |
| maker-4-agustus-gene-269.71-mRNA-1 | Japonica | Indica   | Kinase-TM | Os01g0783800 | OsR498G0409339200.01.T03  | Cysteine rich receptor like kinase                                         |
| maker-4-agustus-gene-279.14-mRNA-1 | Japonica | NA       | Kinase-TM | Os04g0654600 | OsR498G0409406500.01.T01  | probable receptor-like serine/threonine-protein kinase AT5g57670           |
| maker-4-agustus-gene-279.21-mRNA-1 | Japonica | NA       | Kinase-TM | Os04g0655300 | OsR498G0409409300.01.T01  | G-type lectin 5-receptor-like serine/threonine-protein kinase              |
| maker-4-agustus-gene-279.23-mRNA-1 | Japonica | Indica   | Kinase-TM | Os04g0655400 | OsR498G0409409600.01.T01  | G-type lectin 5-receptor-like serine/threonine-protein kinase              |
| maker-4-agustus-gene-280.0-mRNA-1  | Japonica | Indica   | Kinase-TM | Os04g0655300 | OsR498G0409409600.01.T01  | Mitogen-activated protein kinase kinase                                    |
| maker-4-agustus-gene-281.48-mRNA-1 | Japonica | Japonica | Kinase-TM | Os04g0558700 | OsR498G0409421500.01.T01  | Similar to putative receptor protein kinase from A. thaliana               |
| maker-4-agustus-gene-292.61-mRNA-1 | Japonica | NA       | Kinase-TM | Os04g0679200 | OsR498G0409497000.01.T02  | Serine/threonine-protein kinase                                            |
| maker-4-agustus-gene-296.20-mRNA-1 | Japonica | NA       | Kinase-TM |              | OsR498G0409524800.01.T04  | Serine/threonine-protein kinase STY46                                      |
| maker-4-agustus-gene-298.34-mRNA-1 | Japonica | NA       | Kinase-TM | Os04g0689400 | OsR498G0409533700.01.T01  | Serine/threonine-protein kinase                                            |
| maker-4-agustus-gene-299.42-mRNA-1 | Japonica | NA       | Kinase-TM | Os04g0691100 | OsR498G0409538500.01.T02  | Serine/threonine-protein kinase SAPK5                                      |
| maker-4-agustus-gene-301.0-mRNA-1  | Japonica | Indica   | Kinase-TM | Os04g0711200 | OsR498G0409546500.01.T02  | probable serine/threonine-protein kinase At1g54610                         |
| maker-4-agustus-gene-31.39-mRNA-1  | Japonica | Indica   | Kinase-TM | Os11g0692100 | OsR498G0407758000.01.T01  | Receptor kinase MRK4                                                       |
| maker-4-agustus-gene-35.20-mRNA-1  | Japonica | NA       | Kinase-TM | Os04g0226600 | OsR498G0407773100.01.T02  | Non-specific serine/threonine protein kinase (Fragment)                    |
| maker-4-agustus-gene-66.41-mRNA-1  | Japonica | NA       | Kinase-TM | Os04g0286000 |                           | Calcium binding EGF domain containing protein, expressed                   |
| maker-4-agustus-gene-68.42-mRNA-1  | Japonica | NA       | Kinase-TM | Os04g0288500 | OsR498G0407951200.01.T01  | Putative receptor-type protein kinase LRK1                                 |
| maker-4-agustus-gene-78.5-mRNA-1   | Japonica | NA       | Kinase-TM | Os04g0303500 | OsR498G0408000400.01.T01  | Receptor-like serine/threonine-protein kinase                              |
| maker-5-agustus-gene-79.14-mRNA-1  | Japonica | NA       | Kinase-TM |              |                           | Putative LOV domain-containing protein                                     |
| maker-5-agustus-gene-14.39-mRNA-1  | Japonica | Japonica | Kinase-TM | Os05g0125300 | OsR498G0509647100.01.T01  | Cysteine-rich kinase LIP2                                                  |
| maker-5-agustus-gene-152.41-mRNA-1 | Japonica | NA       | Kinase-TM | Os05g0319700 | OsR498G0510482900.01.T01  | Phytosulfokine receptor                                                    |
| maker-5-agustus-gene-17.57-mRNA-1  | Japonica | NA       | Kinase-TM |              | OsR498G0509666500.01.T01  | Cysteine-rich receptor-like protein kinase 3                               |
| maker-5-agustus-gene-198.7-mRNA-1  | Japonica | NA       | Kinase-TM | Os05g0389700 | OsR498G0510762700.01.T02  | Cyclin-dependent kinase                                                    |
| maker-5-agustus-gene-20.20-mRNA-1  | Japonica | NA       | Kinase-TM | Os05g0134000 | OsR498G0509679200.01.T01  | Non-specific serine/threonine protein kinase                               |
| maker-5-agustus-gene-200.12-mRNA-1 | Japonica | NA       | Kinase-TM | Os05g0392300 | OsR498G0510773500.01.T01  | Cdk activating kinase (CAK)/RNA polymerase II transcription initiation     |
| maker-5-agustus-gene-200.22-mRNA-1 | Japonica | NA       | Kinase-TM |              | OsR498G0510772400.01.T05  | RING-type E3 ubiquitin transferase                                         |
| maker-5-agustus-gene-203.8-mRNA-1  | Japonica | NA       | Kinase-TM | Os05g0398800 | OsR498G0510792100.01.T01  | Putative serine/threonine-protein kinase RLCKVII (Fragment)                |
| maker-5-agustus-gene-21.30-mRNA-1  | Japonica | NA       | Kinase-TM | Os05g0135800 | OsR498G0509688700.01.T01  | Pto-interacting protein 1                                                  |
| maker-5-agustus-gene-21.51-mRNA-1  | Japonica | NA       | Kinase-TM | Os05g0136200 | OsR498G0509691000.01.T02  | Non-specific serine/threonine protein kinase                               |
| maker-5-agustus-gene-238.66-mRNA-1 | Japonica | NA       | Kinase-TM | Os05g0463000 |                           | Putative serine/threonine-protein kinase PBL26                             |
| maker-5-agustus-gene-247.0-mRNA-1  | Japonica | NA       | Kinase-TM |              | OsR498G0511051300.01.T01  | Serine/threonine-protein kinase STN8 chloroplastic                         |
| maker-5-agustus-gene-25.37-mRNA-1  | Japonica | Indica   | Kinase-TM | Os11g0271100 | OsR498G0509721500.0       |                                                                            |

|                                                 |          |          |           |              |                           |                                                                             |
|-------------------------------------------------|----------|----------|-----------|--------------|---------------------------|-----------------------------------------------------------------------------|
| maker-7-augustus-gene-143.41-mRNA-1             | Japonica | Indica   | Kinase-TM | Os07g0348500 | OsR498G0714165300.01.T03  | Putative serine/threonine-protein kinase SiS8 isoform A                     |
| maker-7-augustus-gene-157.34-mRNA-1             | Japonica | NA       | Kinase-TM |              | OsR498G0714229400.01.T02  | ABC1 domain-containing protein (Fragment)                                   |
| maker-7-augustus-gene-164.33-mRNA-1             | Japonica | Indica   | Kinase-TM | Os07g0471000 | OsR498G0714268500.01.T01  | Serine/threonine-protein kinase/endonuclease IRE1a                          |
| maker-7-augustus-gene-167.38-mRNA-1             | Japonica | Indica   | Kinase-TM | Os07g0472400 | OsR498G0714275700.01.T01  | probable serine/threonine-protein kinase sky1                               |
| maker-7-augustus-gene-169.35-mRNA-1             | Japonica | Indica   | Kinase-TM | Os07g0475900 | OsR498G0714289000.01.T01  | serine/threonine-protein kinase STY46 isoform X2                            |
| maker-7-augustus-gene-177.3-mRNA-1              | Japonica | NA       | Kinase-TM | Os07g0487400 |                           | Receptor protein kinase-like protein                                        |
| maker-7-augustus-gene-206.4-mRNA-1              | Japonica | NA       | Kinase-TM | Os07g0537000 | OsR498G0714501700.01.T01  | Receptor-like serine/threonine-protein kinase                               |
| maker-7-augustus-gene-206.5-mRNA-1              | Japonica | NA       | Kinase-TM |              |                           | G-type lectin 5-receptor-like serine/threonine-protein kinase               |
| maker-7-augustus-gene-207.43-mRNA-1             | Japonica | Indica   | Kinase-TM | Os07g0537500 | OsR498G0714502600.01.T01  | Cysteine-rich receptor-like protein kinase 6                                |
| maker-7-augustus-gene-208.31-mRNA-1             | Japonica | Indica   | Kinase-TM | Os07g0537900 | OsR498G0714510100.01.T01  | Cysteine-rich receptor-like protein kinase 8                                |
| maker-7-augustus-gene-209.33-mRNA-1             | Japonica | NA       | Kinase-TM |              |                           | Cysteine-rich receptor-like protein kinase 25 isoform C                     |
| maker-7-augustus-gene-209.7-mRNA-1              | Japonica | Indica   | Kinase-TM | Os07g0541500 | OsR498G0714517300.01.T01  | Cysteine-rich receptor kinase                                               |
| maker-7-augustus-gene-210.35-mRNA-1             | Japonica | NA       | Kinase-TM |              |                           | PinKase domain-containing protein/Stress-antifung domain-containing protein |
| maker-7-augustus-gene-210.44-mRNA-1             | Japonica | Indica   | Kinase-TM | Os07g0542400 | OsR498G0714520000.01.T01  | Cysteine-rich receptor-like protein kinase 15                               |
| maker-7-augustus-gene-214.18-mRNA-1             | Japonica | NA       | Kinase-TM |              | OsR498G0714538800.01.T02  | Non-specific serine/threonine protein kinase (Fragment)                     |
| maker-7-augustus-gene-214.21-mRNA-1             | Japonica | NA       | Kinase-TM | Os07g0550900 | OsR498G0714541400.01.T01  | Serine/threonine-protein kinase                                             |
| maker-7-augustus-gene-214.25-mRNA-1             | Japonica | NA       | Kinase-TM | Os07g0551300 | OsR498G0714542600.01.T02  | Serine/threonine-protein kinase                                             |
| maker-7-augustus-gene-228.2-mRNA-1              | Japonica | NA       | Kinase-TM | Os07g0572800 | OsR498G0714612300.01.T06  | Serine/threonine-protein kinase WNK1                                        |
| maker-7-augustus-gene-250.8-mRNA-1              | Japonica | NA       | Kinase-TM | Os07g0613500 | OsR498G0714745300.01.T02  | Serine/threonine-protein kinase RIKP                                        |
| maker-7-augustus-gene-255.26-mRNA-1             | Japonica | NA       | Kinase-TM |              |                           | Serine/threonine-protein kinase SRK2C                                       |
| maker-7-augustus-gene-258.17-mRNA-1             | Japonica | NA       | Kinase-TM | Os07g0628700 | OsR498G0714798600.01.T01  | Cysteine-rich receptor-like protein kinase 8                                |
| maker-7-augustus-gene-258.21-mRNA-1             | Japonica | NA       | Kinase-TM | Os07g0628900 | OsR498G0714798800.01.T02  | Non-specific serine/threonine protein kinase                                |
| maker-7-augustus-gene-260.64-mRNA-1             | Japonica | NA       | Kinase-TM |              | OsR498G0714811200.01.T01  | serine/threonine-protein kinase STY8-like isoform X1                        |
| maker-7-augustus-gene-262.14-mRNA-1             | Japonica | NA       | Kinase-TM |              | OsR498G0714826500.01.T04  | Non-specific serine/threonine protein kinase                                |
| maker-7-augustus-gene-264.57-mRNA-1             | Japonica | Indica   | Kinase-TM | Os03g0366200 | OsR498G0714839200.01.T01  | Calcium/calmodulin-dependent serine/threonine-protein kinase 1              |
| maker-7-augustus-gene-280.12-mRNA-1             | Japonica | Indica   | Kinase-TM | Os03g0349200 | OsR498G0715139400.01.T02  | probable serine/threonine-protein kinase At1g54610                          |
| maker-7-augustus-gene-284.30-mRNA-1             | Japonica | NA       | Kinase-TM |              | OsR498G0714949300.01.T02  | PEK protein kinase                                                          |
| maker-7-augustus-gene-290.60-mRNA-1             | Japonica | Indica   | Kinase-TM | Os03g0319400 | OsR498G0714991900.01.T01  | Non-specific serine/threonine protein kinase                                |
| maker-7-augustus-gene-293.6-mRNA-1              | Japonica | NA       | Kinase-TM | Os07g0693000 | OsR498G0715012100.01.T01  | Putative inactive receptor-like protein kinase                              |
| maker-7-augustus-gene-32.0-mRNA-1               | Japonica | Japonica | Kinase-TM | Os07g0203900 | OsR498G0713710700.01.T01  | Proto-oncogene tyrosine-protein kinase YRK                                  |
| maker-7-augustus-gene-4.14-mRNA-1               | Japonica | NA       | Kinase-TM | Os07g0119000 | OsR498G0713919000.01.T01  | Mitogen-activated protein kinase kinase YODA                                |
| maker-7-augustus-gene-70.33-mRNA-1              | Japonica | Indica   | Kinase-TM | Os07g0534500 | OsR498G0713832100.01.T01  | Cysteine-rich receptor-like protein kinase 29                               |
| maker-7-augustus-gene-89.7-mRNA-1               | Japonica | NA       | Kinase-TM |              |                           | Clade IV lectin receptor kinase                                             |
| maker-8-augustus-gene-158.8-mRNA-1              | Japonica | NA       | Kinase-TM | Os08g0343000 | OsR498G0815840500.01.T03  | Proline-rich receptor-like protein kinase PERK14 isoform X5                 |
| maker-8-augustus-gene-16.11-mRNA-1              | Japonica | Japonica | Kinase-TM | Os08g0125200 | OsR498G0815100800.01.T01  | Putative receptor-type protein kinase LRK1                                  |
| maker-8-augustus-gene-2.45-mRNA-1               | Japonica | NA       | Kinase-TM |              | OsR498G0815032000.01.T02  | Serine/threonine-protein kinase STY46                                       |
| maker-8-augustus-gene-23.45-mRNA-1              | Japonica | NA       | Kinase-TM |              | OsR498G0815149000.01.T02  | Calcium/calmodulin-regulated receptor-like protein kinase 1                 |
| maker-8-augustus-gene-260.33-mRNA-1             | Japonica | NA       | Kinase-TM | Os08g0501500 | OsR498G0816405000.01.T01  | Wall-associated receptor kinase 1                                           |
| maker-8-augustus-gene-261.0-mRNA-1              | Japonica | Japonica | Kinase-TM | Os08g0501600 | OsR498G0816405300.01.T01  | Wall associated kinase                                                      |
| maker-8-augustus-gene-267.13-mRNA-1             | Japonica | NA       | Kinase-TM | Os08g0512600 | OsR498G0816453300.01.T01  | Cyclin-dependent kinase B                                                   |
| maker-8-augustus-gene-268.36-mRNA-1             | Japonica | Japonica | Kinase-TM | Os08g0514000 | OsR498G0816459900.01.T01  | L-type lectin-domain containing receptor kinase IV.2                        |
| maker-8-augustus-gene-268.38-mRNA-1             | Japonica | Indica   | Kinase-TM | Os08g0328400 | OsR498G0816460300.01.T01  | Mitogen-activated protein kinase kinase                                     |
| maker-8-augustus-gene-283.2-mRNA-1              | Japonica | NA       | Kinase-TM | Os08g0385200 | OsR498G0816454500.01.T02  | Chitin elicitor receptor kinase 1                                           |
| maker-8-augustus-gene-45.40-mRNA-1              | Japonica | Japonica | Kinase-TM | Os08g0174800 | OsR498G0815299300.01.T01  | LRR receptor kinase BAK1                                                    |
| maker-8-augustus-gene-48.33-mRNA-1              | Japonica | NA       | Kinase-TM |              | OsR498G0815310900.01.T05  | Non-specific serine/threonine protein kinase                                |
| maker-8-augustus-gene-79.35-mRNA-1              | Japonica | NA       | Kinase-TM | Os08g0224100 | OsR498G0815462500.01.T01  | serine/threonine-protein kinase STY13                                       |
| maker-9-augustus-gene-104.0-mRNA-1              | Japonica | NA       | Kinase-TM |              |                           | Senescence-induced receptor-like serine/threonine-protein kinase            |
| maker-9-augustus-gene-107.14-mRNA-1             | Japonica | Indica   | Kinase-TM | Os09g0349600 | OsR498G0917233000.01.T01  | Putative LRR receptor-like serine/threonine protein kinase                  |
| maker-9-augustus-gene-108.67-mRNA-1             | Japonica | Indica   | Kinase-TM | Os09g0348300 | OsR498G0917213300.01.T01  | Serine/threonine-specific receptor protein kinase-like                      |
| maker-9-augustus-gene-108.69-mRNA-1             | Japonica | Indica   | Kinase-TM | Os09g0348300 | OsR498G0917213100.01.T01  | Serine/threonine-specific receptor protein kinase-like                      |
| maker-9-augustus-gene-110.4-mRNA-1              | Japonica | NA       | Kinase-TM |              |                           | L-type lectin-domain containing receptor kinase IX.1                        |
| maker-9-augustus-gene-114.2-mRNA-1              | Japonica | NA       | Kinase-TM |              | OsR498G0917185900.01.T01  | Clade XIV lectin receptor kinase                                            |
| maker-9-augustus-gene-114.3-mRNA-1              | Japonica | NA       | Kinase-TM | Os09g0334800 | OsR498G0917182700.01.T01  | L-type lectin-domain containing receptor kinase IX.1                        |
| maker-9-augustus-gene-115.3-mRNA-1              | Japonica | NA       | Kinase-TM |              |                           | Serine/threonine-specific receptor protein kinase-like                      |
| maker-9-augustus-gene-116.0-mRNA-1              | Japonica | Japonica | Kinase-TM | Os09g0356200 | OsR498G0917236300.01.T05  | Putative LRR receptor-like serine/threonine-protein kinase                  |
| maker-9-augustus-gene-117.3-mRNA-1              | Japonica | Indica   | Kinase-TM | Os09g0356800 | OsR498G0917240400.01.T05  | Protein kinase domain-containing protein                                    |
| maker-9-augustus-gene-127.39-mRNA-1             | Japonica | Indica   | Kinase-TM | Os09g0375600 | OsR498G0917296000.01.T01  | Serine/threonine-protein kinase CDL1                                        |
| maker-9-augustus-gene-171.35-mRNA-1             | Japonica | NA       | Kinase-TM |              | OsR498G0917599400.01.T02  | Non-specific serine/threonine protein kinase                                |
| maker-9-augustus-gene-178.50-mRNA-1             | Japonica | Japonica | Kinase-TM | Os09g0449000 | OsR498G0917648000.01.T02  | Serine/threonine-protein kinase PEPK2                                       |
| maker-9-augustus-gene-180.51-mRNA-1             | Japonica | NA       | Kinase-TM | Os09g0466900 | OsR498G0917661800.01.T01  | Wall-associated receptor kinase-like 8                                      |
| maker-9-augustus-gene-181.50-mRNA-1             | Japonica | NA       | Kinase-TM |              |                           | Wall-associated receptor kinase                                             |
| maker-9-augustus-gene-186.2-mRNA-1              | Japonica | NA       | Kinase-TM | Os09g0482640 | OsR498G0917701900.01.T01  | Wall associated kinase                                                      |
| maker-9-augustus-gene-199.37-mRNA-1             | Japonica | NA       | Kinase-TM |              | OsR498G0917786500.01.T01  | Chitin elicitor receptor kinase 1                                           |
| maker-9-augustus-gene-201.0-mRNA-1              | Japonica | Indica   | Kinase-TM | Os01g0899000 | OsR498G0917927200.01.T02  | Putative Pto kinase interactor 1                                            |
| maker-9-augustus-gene-219.38-mRNA-1             | Japonica | Indica   | Kinase-TM | Os09g0551500 | OsR498G0917921800.01.T02  | Non-specific serine/threonine protein kinase (Fragment)                     |
| maker-9-augustus-gene-219.45-mRNA-1             | Japonica | NA       | Kinase-TM |              |                           | Non-specific serine/threonine protein kinase (Fragment)                     |
| maker-9-augustus-gene-219.47-mRNA-1             | Japonica | NA       | Kinase-TM |              | Os09g0505000              | Non-specific serine/threonine protein kinase (Fragment)                     |
| maker-9-augustus-gene-219.50-mRNA-1             | Japonica | NA       | Kinase-TM |              |                           | Non-specific serine/threonine protein kinase                                |
| maker-9-augustus-gene-219.52-mRNA-1             | Japonica | NA       | Kinase-TM |              | OsR498G0917920000.01.T01  | Serine/threonine-protein kinase                                             |
| maker-9-augustus-gene-219.54-mRNA-1             | Japonica | Indica   | Kinase-TM |              | OsR498G0917921800.01.T01  | Non-specific serine/threonine protein kinase                                |
| maker-9-augustus-gene-220.26-mRNA-1             | Japonica | NA       | Kinase-TM | Os09g0552300 | OsR498G0917948800.01.T01  | Serine/threonine-protein kinase ac33                                        |
| maker-9-augustus-gene-224.22-mRNA-1             | Japonica | Japonica | Kinase-TM | Os09g0541500 | OsR498G0917950700.01.T01  | Wall-associated receptor kinase 3                                           |
| maker-9-augustus-gene-227.10-mRNA-1             | Japonica | NA       | Kinase-TM |              | OsR498G0917964200.01.T02  | Tyrosine kinase                                                             |
| maker-9-augustus-gene-230.46-mRNA-1             | Japonica | NA       | Kinase-TM | Os09g0572600 | OsR498G0917982500.01.T01  | probable serine/threonine-protein kinase PBL23                              |
| maker-9-augustus-gene-96.74-mRNA-1              | Japonica | Japonica | Kinase-TM | Os09g0325140 | OsR498G0917156400.01.T04  | LysM domain receptor-like kinase 10                                         |
| augustus-1-processed-gene-151.26-mRNA-1         | NA       | NA       | Kinase-TM | Os01g0366300 |                           | Cysteine-rich receptor-like protein kinase 10                               |
| augustus-1-processed-gene-381.44-mRNA-1         | NA       | NA       | Kinase-TM | Os01g0386900 | OsR498G09102413500.01.T01 | Serine/threonine-protein kinase SAPK4                                       |
| augustus-1-processed-gene-384.53-mRNA-1         | NA       | Indica   | Kinase-TM | Os01g0889900 | OsR498G09102461100.01.T01 | Receptor-like serine/threonine-protein kinase                               |
| augustus-1-processed-gene-390.53-mRNA-1         | NA       | NA       | Kinase-TM | Os01g0883000 |                           | Receptor-like protein kinase                                                |
| augustus-1-processed-gene-390.54-mRNA-1         | NA       | Indica   | Kinase-TM | Os01g0424200 | OsR498G09102463700.01.T01 | Tyrosine-protein kinase                                                     |
| augustus-1-processed-gene-392.0-mRNA-1          | NA       | NA       | Kinase-TM | Os01g0885700 | OsR498G09102473900.01.T01 | Serine/threonine-protein kinase                                             |
| augustus-1-processed-gene-395.54-mRNA-1         | NA       | Indica   | Kinase-TM | Os01g0891800 | OsR498G09102498100.01.T02 | Dual specificity protein kinase shK                                         |
| augustus-1-processed-gene-435.41-mRNA-1         | NA       | NA       | Kinase-TM | Os01g0869900 | OsR498G09102413500.01.T01 | Serine/threonine-protein kinase SAPK4                                       |
| augustus-1-processed-gene-435.54-mRNA-1         | NA       | Indica   | Kinase-TM | Os01g0889900 | OsR498G09102461100.01.T01 | Receptor-like serine/threonine-protein kinase                               |
| augustus-1-processed-gene-441.20-mRNA-1         | NA       | NA       | Kinase-TM | Os01g0883000 |                           | Receptor-like protein kinase                                                |
| augustus-1-processed-gene-441.21-mRNA-1         | NA       | Indica   | Kinase-TM | Os01g0492400 | OsR498G09102463700.01.T01 | Tyrosine-protein kinase                                                     |
| augustus-1-processed-gene-442.42-mRNA-1         | NA       | NA       | Kinase-TM | Os01g0885700 | OsR498G09102473900.01.T01 | Serine/threonine-protein kinase                                             |
| augustus-1-processed-gene-446.17-mRNA-1         | NA       | Indica   | Kinase-TM | Os01g0891800 | OsR498G09102498100.01.T02 | Dual specificity protein kinase shK                                         |
| augustus-1-processed-gene-58.69-mRNA-1          | NA       | Indica   | Kinase-TM | Os01g0206300 | OsR498G09100377100.01.T01 | Non-specific serine/threonine protein kinase                                |
| augustus-1-processed-gene-67.44-mRNA-1          | NA       | Indica   | Kinase-TM | Os01g0222800 | OsR498G09100443500.01.T01 | Serine/threonine-protein kinase                                             |
| augustus-1-processed-gene-67.45-mRNA-1          | NA       | NA       | Kinase-TM | 0            | OsR498G09100443900.01.T01 | Serine/threonine-protein kinase                                             |
| augustus-1-processed-gene-93.35-mRNA-1          | NA       | NA       | Kinase-TM | Os01g0267800 | OsR498G09100624700.01.T01 | serine/threonine-protein kinase-like protein At5g23170                      |
| augustus-10-processed-gene-38.5-mRNA-1          | NA       | Japonica | Kinase-TM | Os01g0157400 | OsR498G0910161300.01.T01  | Putative cyclin-dependent kinase F-2                                        |
| augustus-10-processed-gene-9.12-mRNA-1          | NA       | Indica   | Kinase-TM | Os01g0105100 | OsR498G09101803700.01.T01 | Wall-associated receptor kinase 2                                           |
| augustus-11-processed-gene-256.22-mRNA-1        | NA       | NA       | Kinase-TM | Os01g0691240 | OsR498G1120759300.01.T01  | Wall associated kinase-like                                                 |
| augustus-2-processed-gene-261.6-mRNA-1          | NA       | NA       | Kinase-TM | Os02g0632800 | OsR498G09204378000.01.T02 | Wall-associated receptor kinase-like protein 9                              |
| augustus-4-processed-gene-121.14-mRNA-1         | NA       | NA       | Kinase-TM | 0            | OsR498G0408317100.01.T03  | Wall-associated receptor kinase 3                                           |
| augustus-4-processed-gene-212.65-mRNA-1         | NA       | NA       | Kinase-TM | Os04g0531300 | OsR498G0408965500.01.T01  | Lectin receptor-type kinase                                                 |
| augustus-4-processed-gene-268.79-mRNA-1         | NA       | Japonica | Kinase-TM | Os04g0433800 | OsR498G0409334600.01.T02  | Non-specific serine/threonine protein kinase                                |
| augustus-5-processed-gene-118.14-mRNA-1         | NA       | NA       | Kinase-TM | Os05g0280700 | OsR498G05102277400.01.T01 | Receptor-like protein kinase ANXUR1                                         |
| augustus-5-processed-gene-281.47-mRNA-1         | NA       | NA       | Kinase-TM | Os05g0545400 | OsR498G0511283000.01.T01  | Mitogen-activated protein kinase kinase ANP1-like                           |
| augustus-7-processed-gene-12.20-mRNA-1          | NA       | Japonica | Kinase-TM | Os07g0130300 | OsR498G0713999000.01.T01  | L-type lectin-domain containing receptor kinase IV.1                        |
| augustus-7-processed-gene-12.22-mRNA-1          | NA       | Japonica | Kinase-TM | Os07g0130600 | OsR498G0716878800.01.T01  | Putative receptor kinase Leckr                                              |
| augustus-7-processed-gene-12.23-mRNA-1          | NA       | Japonica | Kinase-TM | Os07g0160700 | OsR498G0713461800.01.T01  | L-type lectin-domain containing receptor kinase IV.1                        |
| augustus-7-processed-gene-12.25-mRNA-1          | NA       | NA       | Kinase-TM | Os07g0130800 | OsR498G0713462000.01.T01  | Putative receptor kinase Leckr                                              |
| augustus-7-processed-gene-181.23-mRNA-1         | NA       | NA       | Kinase-TM | Os07g0493800 | OsR498G0714347500.01.T01  | Wall-associated protein kinase                                              |
| augustus-7-processed-gene-208.7-mRNA-1          | NA       | NA       | Kinase-TM |              |                           | Receptor-like serine/threonine-protein kinase                               |
| augustus-7-processed-gene-285.36-mRNA-1         | NA       | Japonica | Kinase-TM | Os07g0678300 | OsR498G0306613200.01.T01  | Non-specific serine/threonine protein kinase                                |
| augustus-7-processed-gene-285.47-mRNA-1         | NA       | NA       | Kinase-TM | Os07g0678600 | OsR498G0714955800.01.T01  | CBL interacting protein kinase                                              |
| augustus-7-processed-gene-126.25-mRNA-1         | NA       | NA       | Kinase-TM |              |                           | Wall-associated receptor kinase 2                                           |
| augustus_masked-1-processed-gene-58.86-mRNA-1   | NA       | NA       | Kinase-TM | Os01g0208700 | OsR498G09100377600.01.T01 | Non-specific serine/threonine protein kinase                                |
| augustus_masked-10-processed-gene-148.16-mRNA-1 | NA       | NA       | Kinase-TM | Os04g0103500 | OsR498G0407421200.01.T01  | G-type lectin 5-receptor-like serine/threonine protein kinase               |
| augustus_masked-10-processed-gene-17.31-mRNA-1  | NA       | Japonica | Kinase-TM | Os01g0123300 | OsR498G1018069800.01.T01  | Mitogen-activated protein kinase                                            |
| augustus_masked-10-processed-gene-36.28-mRNA-1  | NA       | NA       | Kinase-TM | Os01g0154500 | OsR498G1018162400.01.T01  | Cyclin-dependent kinase-like 2                                              |
| augustus_masked-12-processed-gene-139.29-mRNA-1 | NA       | NA       | Kinase-TM | Os01g0427000 |                           | Cyclin-dependent kinase                                                     |
| augustus_masked-12-processed-gene-199.30-mRNA-1 | NA       | NA       | Kinase-TM | Os01g0504000 |                           | active receptor kinase-like protein                                         |
| augustus_masked-12-processed-gene-257.18-mRNA-1 | NA       | Japonica | Kinase-TM | Os01g0603700 | OsR498G0306613200.01.T01  | Non-specific serine/threonine protein kinase                                |
| augustus_masked-12-processed-gene-260.9-mRNA-1  | NA       | Indica   | Kinase-TM | Os01g0608500 | OsR498G1222075300.01.T01  | L-type lectin-domain containing receptor kinase IX.1                        |
| augustus_masked-3-processed-gene-242.7-mRNA-1   | NA       | NA       | Kinase-TM | Os03g0269300 | OsR498G0305649000.01.T01  | Protein kinase domain-containing protein (Fragment)                         |
| augustus_masked-3-processed-gene-318.0-mRNA-1   | NA       | NA       | Kinase-TM | Os01g0342300 | OsR498G0408563300.01.T01  | Non-specific serine/threonine protein kinase (Fragment)                     |
| augustus_masked-3-processed-gene-502.39-mRNA-1  | NA       | NA       | Kinase-TM | Os01g0242000 |                           | Cyclin-dependent kinase                                                     |
| augustus_masked-3-processed-gene-63.45-mRNA-1   | NA       | NA       | Kinase-TM | Os03g0223100 | OsR498G030548800.01.T01   | Mitogen                                                                     |

|                                       |    |          |           |              |                           |                                                                                         |
|---------------------------------------|----|----------|-----------|--------------|---------------------------|-----------------------------------------------------------------------------------------|
| maker-1-augustus-gene-254.15-mRNA-1   | NA | NA       | Kinase-TM | Os01g0621600 | OsR498G0101562800.01.T02  | Serine/threonine-protein kinase MARK2                                                   |
| maker-1-augustus-gene-255.29-mRNA-1   | NA | Indica   | Kinase-TM | Os05g0855500 | OsR498G0101565900.01.T01  | Calcium-dependent protein kinase 1 isoform A                                            |
| maker-1-augustus-gene-264.49-mRNA-1   | NA | NA       | Kinase-TM | Os01g0641000 | OsR498G0101624900.01.T01  | Serine/threonine-protein kinase STY8                                                    |
| maker-1-augustus-gene-265.37-mRNA-1   | NA | NA       | Kinase-TM | 0            | 0                         | Non-specific serine/threonine protein kinase                                            |
| maker-1-augustus-gene-266.5-mRNA-1    | NA | NA       | Kinase-TM | 0            | 0                         | Mitogen-activated protein kinase                                                        |
| maker-1-augustus-gene-278.40-mRNA-1   | NA | NA       | Kinase-TM | Os01g0665200 | OsR498G0101709700.01.T01  | Mitogen-activated protein kinase                                                        |
| maker-1-augustus-gene-292.1-mRNA-1    | NA | NA       | Kinase-TM | Os01g0690800 | OsR498G0101800500.01.T01  | Protein kinase domain-containing protein (Fragment)                                     |
| maker-1-augustus-gene-374.48-mRNA-1   | NA | Indica   | Kinase-TM | Os03g0825800 | OsR498G0102345600.01.T02  | Serine/threonine protein kinase                                                         |
| maker-1-augustus-gene-384.34-mRNA-1   | NA | Indica   | Kinase-TM | Os01g0889900 | OsR498G010244800.01.T01   | Receptor-like serine/threonine protein kinase                                           |
| maker-1-augustus-gene-384.35-mRNA-1   | NA | NA       | Kinase-TM | 0            | OsR498G0102415600.01.T01  | Non-specific serine/threonine protein kinase (Fragment)                                 |
| maker-1-augustus-gene-390.20-mRNA-1   | NA | NA       | Kinase-TM | 0            | OsR498G0102460400.01.T03  | probable serine/threonine-protein kinase PBL16                                          |
| maker-1-augustus-gene-394.0-mRNA-1    | NA | Indica   | Kinase-TM | Os01g0890600 | OsR498G0102489700.01.T01  | Non-specific serine/threonine protein kinase (Fragment)                                 |
| maker-1-augustus-gene-394.19-mRNA-1   | NA | NA       | Kinase-TM | Os01g0889900 | OsR498G0102488800.01.T01  | Receptor-like serine/threonine protein kinase                                           |
| maker-1-augustus-gene-394.3-mRNA-1    | NA | Indica   | Kinase-TM | Os01g0890600 | OsR498G0102491100.01.T02  | Receptor-like serine/threonine-protein kinase                                           |
| maker-1-augustus-gene-398.16-mRNA-1   | NA | NA       | Kinase-TM | Os01g0899000 | OsR498G0102515200.01.T01  | Tyrosine-protein kinase                                                                 |
| maker-1-augustus-gene-404.31-mRNA-1   | NA | NA       | Kinase-TM | Os01g0621600 | OsR498G0101562800.01.T02  | Serine/threonine-protein kinase MARK2                                                   |
| maker-1-augustus-gene-414.47-mRNA-1   | NA | NA       | Kinase-TM | 0            | OsR498G0101485500.01.T05  | Kinase protein with adenine nucleotide alpha hydrolases-like domain isoform 1           |
| maker-1-augustus-gene-415.56-mRNA-1   | NA | Indica   | Kinase-TM | Os01g0601200 | OsR498G0101477700.01.T01  | Putative serine/threonine-protein kinase                                                |
| maker-1-augustus-gene-425.19-mRNA-1   | NA | Indica   | Kinase-TM | Os03g0825800 | OsR498G0102345600.01.T02  | Serine/threonine protein kinase                                                         |
| maker-1-augustus-gene-435.37-mRNA-1   | NA | Indica   | Kinase-TM | Os01g0889900 | OsR498G0102415600.01.T01  | Receptor-like serine/threonine-protein kinase                                           |
| maker-1-augustus-gene-435.39-mRNA-1   | NA | NA       | Kinase-TM | 0            | OsR498G0102415600.01.T01  | Non-specific serine/threonine protein kinase (Fragment)                                 |
| maker-1-augustus-gene-441.74-mRNA-1   | NA | NA       | Kinase-TM | 0            | OsR498G0102460400.01.T03  | probable serine/threonine-protein kinase PBL16                                          |
| maker-1-augustus-gene-445.24-mRNA-1   | NA | NA       | Kinase-TM | Os01g0889900 | OsR498G0102488800.01.T01  | Receptor-like serine/threonine-protein kinase                                           |
| maker-1-augustus-gene-445.6-mRNA-1    | NA | Indica   | Kinase-TM | Os01g0890600 | OsR498G0102489700.01.T01  | Non-specific serine/threonine protein kinase (Fragment)                                 |
| maker-1-augustus-gene-449.48-mRNA-1   | NA | Indica   | Kinase-TM | Os01g0890600 | OsR498G0102491100.01.T02  | Receptor-like serine/threonine-protein kinase                                           |
| maker-1-augustus-gene-453.37-mRNA-1   | NA | NA       | Kinase-TM | Os01g0899000 | OsR498G0102515200.01.T01  | Tyrosine-protein kinase                                                                 |
| maker-1-augustus-gene-465.17-mRNA-1   | NA | NA       | Kinase-TM | Os01g0621600 | OsR498G0101562800.01.T02  | Serine/threonine-protein kinase MARK2                                                   |
| maker-1-augustus-gene-465.17-mRNA-1   | NA | NA       | Kinase-TM | 0            | OsR498G0101485500.01.T05  | Kinase protein with adenine nucleotide alpha hydrolases-like domain isoform 1           |
| maker-1-augustus-gene-466.47-mRNA-1   | NA | Indica   | Kinase-TM | Os01g0601200 | OsR498G0101477700.01.T01  | Putative serine/threonine-protein kinase                                                |
| maker-1-augustus-gene-47.42-mRNA-1    | NA | NA       | Kinase-TM | Os01g0186700 | OsR498G0100292200.01.T01  | AGC (cAMP-dependent cGMP-dependent and protein kinase C) kinase family protein          |
| maker-1-augustus-gene-51.18-mRNA-1    | NA | NA       | Kinase-TM | 0            | OsR498G0100292200.01.T01  | Protein kinase domain-containing protein                                                |
| maker-1-augustus-gene-53.5-mRNA-1     | NA | Indica   | Kinase-TM | Os08g0112500 | OsR498G0100355100.01.T01  | probable serine/threonine-protein kinase At1g54610                                      |
| maker-1-augustus-gene-58.31-mRNA-1    | NA | Indica   | Kinase-TM | Os05g0207500 | OsR498G0100374600.01.T04  | Non-specific serine/threonine protein kinase                                            |
| maker-1-augustus-gene-82.9-mRNA-1     | NA | NA       | Kinase-TM | Os01g0247500 | OsR498G0100545400.01.T01  | receptor-like serine/threonine-protein kinase At1g78530                                 |
| maker-1-augustus-gene-84.39-mRNA-1    | NA | NA       | Kinase-TM | Os01g0252100 | OsR498G0100559700.01.T07  | Non-specific serine/threonine protein kinase                                            |
| maker-1-augustus-gene-84.72-mRNA-1    | NA | NA       | Kinase-TM | Os01g0253100 | OsR498G0100562800.01.T03  | proline-rich receptor-like protein kinase PERK3                                         |
| maker-1-augustus-gene-89.20-mRNA-1    | NA | NA       | Kinase-TM | Os01g0259200 | OsR498G0100587300.01.T01  | Serine/threonine-protein kinase PBL27                                                   |
| maker-1-augustus-gene-87.52-mRNA-1    | NA | NA       | Kinase-TM | Os01g0259400 | OsR498G0100587800.01.T01  | Serine/threonine-protein kinase RUNELK                                                  |
| maker-10-augustus-gene-127.40-mRNA-1  | NA | NA       | Kinase-TM | Os04g0140400 | OsR498G0407534800.01.T01  | Serine/threonine-protein kinase                                                         |
| maker-10-augustus-gene-127.41-mRNA-1  | NA | NA       | Kinase-TM | Os04g0125700 | OsR498G0407534800.01.T01  | Non-specific serine/threonine protein kinase                                            |
| maker-10-augustus-gene-127.48-mRNA-1  | NA | NA       | Kinase-TM | Os04g0141200 | OsR498G0407536900.01.T01  | Receptor-like serine/threonine-protein kinase                                           |
| maker-10-augustus-gene-122.28-mRNA-1  | NA | NA       | Kinase-TM | Os04g0125700 | OsR498G0407536900.01.T01  | Agglutinin-2                                                                            |
| maker-10-augustus-gene-145.10-mRNA-1  | NA | Indica   | Kinase-TM | Os04g0109100 | OsR498G0407442400.01.T01  | Non-specific serine/threonine protein kinase                                            |
| maker-10-augustus-gene-56.31-mRNA-1   | NA | Indica   | Kinase-TM | Os01g0180800 | OsR498G0101827600.01.T01  | Calcium binding EGF domain containing protein, expressed                                |
| maker-11-augustus-gene-123.43-mRNA-1  | NA | NA       | Kinase-TM | 0            | OsR498G1120059900.01.T01  | probable serine/threonine-protein kinase PBL28                                          |
| maker-11-augustus-gene-230.58-mRNA-1  | NA | Indica   | Kinase-TM | Os06g0693200 | OsR498G1120627100.01.T01  | Protein kinase domain containing protein, expressed                                     |
| maker-11-augustus-gene-256.34-mRNA-1  | NA | NA       | Kinase-TM | Os01g0695850 | OsR498G1120743300.01.T02  | Wall-associated receptor kinase                                                         |
| maker-11-augustus-gene-256.48-mRNA-1  | NA | Indica   | Kinase-TM | Os01g0691240 | OsR498G1120759300.01.T01  | Wall-associated kinase-like                                                             |
| maker-11-augustus-gene-75.2-mRNA-1    | NA | NA       | Kinase-TM | 0            | OsR498G1119613600.01.T01  | Customer beta subunit, putative                                                         |
| maker-12-augustus-gene-1.5-mRNA-1     | NA | NA       | Kinase-TM | 0            | 0                         | Nonphosphotrophic hypocoxy 1                                                            |
| maker-12-augustus-gene-147.6-mRNA-1   | NA | NA       | Kinase-TM | Os02g0433500 | OsR498G1221451200.01.T03  | serine/threonine-protein kinase TIO                                                     |
| maker-12-augustus-gene-241.74-mRNA-1  | NA | Indica   | Kinase-TM | Os02g0559300 | OsR498G1221932600.01.T02  | Protein kinase domain containing protein, expressed                                     |
| maker-12-augustus-gene-247.13-mRNA-1  | NA | NA       | Kinase-TM | Os01g0586100 | OsR498G1221987400.01.T01  | Serine/threonine-protein kinase SAPK10                                                  |
| maker-12-augustus-gene-252.9-mRNA-1   | NA | NA       | Kinase-TM | Os02g0594300 | OsR498G1222027100.01.T01  | Serine/threonine-protein kinase CTR1                                                    |
| maker-12-augustus-gene-259.2-mRNA-1   | NA | NA       | Kinase-TM | Os01g0606000 | 0                         | Lectin protein kinase, putative, expressed                                              |
| maker-12-augustus-gene-260.56-mRNA-1  | NA | Indica   | Kinase-TM | Os01g0608500 | OsR498G1222073900.01.T01  | Protein kinase-like resistance protein (Fragment)                                       |
| maker-12-augustus-gene-281.15-mRNA-1  | NA | NA       | Kinase-TM | Os07g0114400 | OsR498G0713403200.01.T01  | CK2 protein kinase alpha 4                                                              |
| maker-12-augustus-gene-283.35-mRNA-1  | NA | NA       | Kinase-TM | Os04g0560600 | OsR498G0409068000.01.T01  | Calcium-dependent protein kinase                                                        |
| maker-12-augustus-gene-284.41-mRNA-1  | NA | NA       | Kinase-TM | 0            | OsR498G0409078000.01.T02  | Mitogen-activated protein kinase pink-2 (inferred by orthology to a C. elegans protein) |
| maker-12-augustus-gene-285.20-mRNA-1  | NA | NA       | Kinase-TM | Os01g0606000 | 0                         | probable serine/threonine-protein kinase PXL13                                          |
| maker-12-augustus-gene-288.123-mRNA-1 | NA | NA       | Kinase-TM | 0            | 0                         | Lectin protein kinase, putative, expressed                                              |
| maker-12-augustus-gene-288.90-mRNA-1  | NA | NA       | Kinase-TM | Os01g0606000 | 0                         | Lectin protein kinase, putative, expressed                                              |
| maker-12-augustus-gene-43.8-mRNA-1    | NA | NA       | Kinase-TM | 0            | OsR498G1221046200.01.T01  | Protein kinase protein with adenine nucleotide alpha hydrolase-like domain              |
| maker-12-augustus-gene-43.9-mRNA-1    | NA | NA       | Kinase-TM | 0            | OsR498G1221046200.01.T01  | Proline-rich receptor-like protein kinase PERK13                                        |
| maker-12-augustus-gene-5.18-mRNA-1    | NA | NA       | Kinase-TM | Os01g0186700 | OsR498G0100292200.01.T01  | Putative serine/threonine-protein kinase                                                |
| maker-2-augustus-gene-10.86-mRNA-1    | NA | NA       | Kinase-TM | Os02g0120100 | OsR498G0202861000.01.T04  | Serine/threonine-protein kinase STY46                                                   |
| maker-2-augustus-gene-107.44-mRNA-1   | NA | NA       | Kinase-TM | 0            | OsR498G0203403400.01.T02  | serine/threonine-protein kinase RH35                                                    |
| maker-2-augustus-gene-197.16-mRNA-1   | NA | NA       | Kinase-TM | 0            | OsR498G0203979600.01.T05  | Mitogen activated kinase kinase kinase CTR1                                             |
| maker-2-augustus-gene-234.7-mRNA-1    | NA | NA       | Kinase-TM | Os02g0594100 | OsR498G0204225300.01.T02  | serine/threonine-protein kinase STY13                                                   |
| maker-2-augustus-gene-247.6-mRNA-1    | NA | Indica   | Kinase-TM | Os02g0615500 | OsR498G0204301900.01.T02  | Putative LRR receptor-like serine/threonine-protein kinase                              |
| maker-2-augustus-gene-262.27-mRNA-1   | NA | NA       | Kinase-TM | Os02g0630646 | OsR498G0204379000.01.T01  | Wall-associated receptor kinase-4                                                       |
| maker-2-augustus-gene-262.30-mRNA-1   | NA | NA       | Kinase-TM | 0            | 0                         | Wall-associated receptor kinase-4                                                       |
| maker-2-augustus-gene-296.6-mRNA-1    | NA | NA       | Kinase-TM | Os02g0700600 | OsR498G0204600900.01.T03  | Serine/threonine-protein kinase MHK                                                     |
| maker-2-augustus-gene-326.33-mRNA-1   | NA | NA       | Kinase-TM | Os06g0676600 | OsR498G0613170800.01.T01  | Serine/threonine-protein kinase StpK-D                                                  |
| maker-2-augustus-gene-333.46-mRNA-1   | NA | NA       | Kinase-TM | Os06g0663400 | OsR498G0613118900.01.T01  | Serine/threonine-protein kinase STY13                                                   |
| maker-2-augustus-gene-344.16-mRNA-1   | NA | NA       | Kinase-TM | Os06g0654500 | OsR498G0613085100.01.T01  | Concanavalin A-like lectin/glucanase domain, Serine/threonine-protein kinase, SIK1/2    |
| maker-2-augustus-gene-368.34-mRNA-1   | NA | NA       | Kinase-TM | 0            | OsR498G0613057100.01.T01  | Trithorax group protein osa-like                                                        |
| maker-2-augustus-gene-35.20-mRNA-1    | NA | NA       | Kinase-TM | Os02g0165100 | OsR498G0203030300.01.T07  | Serine/threonine-protein kinase StpK-B                                                  |
| maker-2-augustus-gene-383.0-mRNA-1    | NA | Japonica | Kinase-TM | Os02g0811200 | OsR498G0204979300.01.T01  | Wall-associated receptor kinase 5                                                       |
| maker-2-augustus-gene-385.38-mRNA-1   | NA | NA       | Kinase-TM | Os02g0815900 | OsR498G0205003400.01.T01  | Receptor-like serine/threonine-protein kinase ALE2 isoform A                            |
| maker-2-augustus-gene-4.19-mRNA-1     | NA | NA       | Kinase-TM | Os02g0106900 | OsR498G0202819600.01.T01  | Sensescence-induced receptor-like serine/threonine protein kinase                       |
| maker-2-augustus-gene-44.50-mRNA-1    | NA | NA       | Kinase-TM | 0            | OsR498G0203114600.01.T01  | Physiolokine receptor                                                                   |
| maker-2-augustus-gene-73.17-mRNA-1    | NA | NA       | Kinase-TM | 0            | OsR498G0203266600.01.T01  | Receptor-like protein kinase HSL1                                                       |
| maker-3-augustus-gene-122.0-mRNA-1    | NA | NA       | Kinase-TM | Os01g0562500 | OsR498G0101920190.01.T03  | Serine/threonine-protein kinase D6PKL2                                                  |
| maker-3-augustus-gene-122.11-mRNA-1   | NA | NA       | Kinase-TM | Os01g0563500 | OsR498G01019206100.01.T02 | Serine/threonine-protein kinase cdc7                                                    |
| maker-3-augustus-gene-123.59-mRNA-1   | NA | NA       | Kinase-TM | Os01g0564500 | OsR498G0101920960.01.T02  | Serine/threonine-protein kinase sapk3                                                   |
| maker-3-augustus-gene-157.53-mRNA-1   | NA | NA       | Kinase-TM | Os03g0339900 | OsR498G0305916600.01.T02  | Non-specific serine/threonine protein kinase                                            |
| maker-3-augustus-gene-205.34-mRNA-1   | NA | Japonica | Kinase-TM | Os03g0407900 | OsR498G0304167000.01.T01  | Serine/threonine-protein kinase RPKP                                                    |
| maker-3-augustus-gene-258.11-mRNA-1   | NA | Indica   | Kinase-TM | Os03g0610900 | OsR498G0306549800.01.T02  | Serine/threonine-protein kinase SAPK10                                                  |
| maker-3-augustus-gene-301.27-mRNA-1   | NA | NA       | Kinase-TM | 0            | 0                         | Serine/threonine-protein kinase edf1                                                    |
| maker-3-augustus-gene-311.6-mRNA-1    | NA | NA       | Kinase-TM | Os01g0351500 | OsR498G01018522700.01.T01 | Tyrosine-protein kinase                                                                 |
| maker-3-augustus-gene-327.30-mRNA-1   | NA | NA       | Kinase-TM | Os01g0327000 | OsR498G0101844900.01.T02  | Receptor-like serine/threonine-protein kinase                                           |
| maker-3-augustus-gene-351.20-mRNA-1   | NA | NA       | Kinase-TM | Os03g0266200 | OsR498G030649000.01.T01   | Proline-rich receptor-like protein kinase PERK3                                         |
| maker-3-augustus-gene-367.3-mRNA-1    | NA | Indica   | Kinase-TM | Os03g0610900 | OsR498G0306549800.01.T02  | Serine/threonine-protein kinase SAPK10                                                  |
| maker-3-augustus-gene-444.40-mRNA-1   | NA | Indica   | Kinase-TM | Os03g0745700 | OsR498G0307037500.01.T01  | Serine/threonine-protein kinase sty17                                                   |
| maker-3-augustus-gene-5.25-mRNA-1     | NA | NA       | Kinase-TM | Os03g0114300 | OsR498G0305114700.01.T01  | Serine/threonine-protein kinase frak2                                                   |
| maker-3-augustus-gene-81.19-mRNA-1    | NA | NA       | Kinase-TM | 0            | OsR498G0305607600.01.T01  | Putative receptor-type protein kinase LRRK1                                             |
| maker-3-augustus-gene-95.56-mRNA-1    | NA | NA       | Kinase-TM | Os03g0283900 | OsR498G0305709600.01.T01  | Serine/threonine-protein kinase RLCKVII                                                 |
| maker-4-augustus-gene-202.31-mRNA-1   | NA | Indica   | Kinase-TM | Os04g0364900 | OsR498G0408254600.01.T01  | Wall-associated receptor kinase 1                                                       |
| maker-4-augustus-gene-124.35-mRNA-1   | NA | NA       | Kinase-TM | Os04g0368000 | OsR498G0408337400.01.T01  | Wall-associated receptor kinase 2                                                       |
| maker-4-augustus-gene-126.0-mRNA-1    | NA | NA       | Kinase-TM | 0            | 0                         | Protein kinase domain-containing protein (Fragment)                                     |
| maker-4-augustus-gene-179.56-mRNA-1   | NA | Japonica | Kinase-TM | Os04g0465900 | OsR498G0408725800.01.T01  | Serine/threonine-protein kinase                                                         |
| maker-4-augustus-gene-190.22-mRNA-1   | NA | NA       | Kinase-TM | Os04g0480000 | OsR498G0408798300.01.T05  | Cyclin-dependent kinase G-2                                                             |
| maker-4-augustus-gene-201.39-mRNA-1   | NA | NA       | Kinase-TM | 0            | OsR498G0408871500.01.T01  | Receptor-like serine/threonine-protein kinase ale2                                      |
| maker-4-augustus-gene-205.22-mRNA-1   | NA | Indica   | Kinase-TM | Os04g0364800 | OsR498G0408902600.01.T01  | Wall-associated receptor kinase 1                                                       |
| maker-4-augustus-gene-217.46-mRNA-1   | NA | NA       | Kinase-TM | Os04g0540900 | OsR498G0408995400.01.T01  | Leucine-rich repeat receptor protein kinase EXS                                         |
| maker-4-augustus-gene-22.52-mRNA-1    | NA | Japonica | Kinase-TM | Os04g0201900 | OsR498G0407717600.01.T01  | Non-specific serine/threonine protein kinase                                            |
| maker-4-augustus-gene-227.38-mRNA-1   | NA | NA       | Kinase-TM | Os04g0560600 | OsR498G0409068000.01.T01  | Calcium-dependent protein kinase                                                        |
| maker-4-augustus-gene-229.42-mRNA-1   | NA | NA       | Kinase-TM | 0            | 0                         | Protein kinase domain-containing protein                                                |
| maker-4-augustus-gene-229.58-mRNA-1   | NA | NA       | Kinase-TM | Os04g0563900 | OsR498G0409078000.01.T01  | probable serine/threonine-protein kinase PXL13                                          |
| maker-4-augustus-gene-250.43-mRNA-1   | NA | NA       | Kinase-TM | Os04g0402800 | OsR498G0409227400.01.T04  | Serine/threonine-protein kinase mli/brain-like                                          |
| maker-4-augustus-gene-255.7-mRNA-1    | NA | NA       | Kinase-TM | Os04g0608900 | OsR498G0409252600.01.T01  | Serine/threonine-protein kinase STY13                                                   |
| maker-4-augustus-gene-268.10-mRNA-1   | NA | NA       | Kinase-TM | Os04g0632300 | 0                         | Non-specific serine/threonine protein kinase                                            |
| maker-4-augustus-gene-268.13-mRNA-1   | NA | NA       | Kinase-TM | Os04g0632500 | OsR498G0409334400.01.T03  | Serine/threonine-protein kinase                                                         |
| maker-4-augustus-gene-268.16-mRNA-1   | NA | Indica   | Kinase-TM | Os04g0632600 | OsR498G0409334600.01.T02  | Non-specific serine/threonine protein kinase                                            |
| maker-4-augustus-gene-268.22-mRNA-1   | NA | Indica   | Kinase-TM | Os04g0632700 | OsR498G0409334800.01.T01  | Serine/threonine-protein kinase                                                         |
| maker-4-augustus-gene-268.31-mRNA-1   | NA | NA       | Kinase-TM | Os04g0633300 | OsR498G0409336200.01.T01  | Non-specific serine/threonine protein kinase                                            |
| maker-4-augustus-gene-268.36-mRNA-1   | NA | NA       | Kinase-TM | Os04g0633900 | OsR498G0409338200.01.T01  | Serine/threonine-protein kinase                                                         |
| maker-4-augustus-gene-268.39-mRNA-1   | NA | Japonica | Kinase-TM | Os04g0634000 | OsR498G0409338400.01.T01  | G-type lectin 5-receptor-like                                                           |

|                                                |          |          |           |              |                            |                                                                                                 |
|------------------------------------------------|----------|----------|-----------|--------------|----------------------------|-------------------------------------------------------------------------------------------------|
| maker-6-augustus-gene-275.0-mRNA-1             | NA       | NA       | Kinase-TM | Os06g0663400 | OsR498G0611318900.01.T01   | serine/threonine-protein kinase STY13                                                           |
| maker-6-augustus-gene-282.18-mRNA-1            | NA       | NA       | Kinase-TM | Os06g0676600 | OsR498G0611370800.01.T03   | Putative leucine-rich repeat receptor-like serine/threonine-protein kinase                      |
| maker-6-augustus-gene-358.0-mRNA-1             | NA       | NA       | Kinase-TM | Os06g0734900 | OsR498G051533700.01.T01    | Serine/threonine-protein kinase sty46                                                           |
| maker-6-augustus-gene-34.7-mRNA-1              | NA       | NA       | Kinase-TM | Os06g0164900 | OsR498G0611684100.01.T01   | Mitogen-activated protein kinase kinase kinase                                                  |
| maker-6-augustus-gene-35.67-mRNA-1             | NA       | NA       | Kinase-TM | Os06g0168800 | OsR498G0611688600.01.T01   | Mitogen-activated protein kinase kinase kinase                                                  |
| maker-6-augustus-gene-36.12-mRNA-1             | NA       | NA       | Kinase-TM | Os06g0170250 | OsR498G0611702500.01.T01   | Putative WAK family receptor-like protein kinase                                                |
| maker-6-augustus-gene-37.1-mRNA-1              | NA       | NA       | Kinase-TM | Os06g0170250 | OsR498G0611702500.01.T01   | Putative WAK family receptor-like protein kinase                                                |
| maker-6-augustus-gene-40.43-mRNA-1             | NA       | NA       | Kinase-TM | 0            | OsR498G0611724300.01.T05   | Serine/threonine-protein kinase                                                                 |
| maker-6-augustus-gene-51.47-mRNA-1             | NA       | Indica   | Kinase-TM | Os10g0411900 | OsR498G0610146400.01.T01   | Putative receptor kinase Lerck                                                                  |
| maker-6-augustus-gene-9.3-mRNA-1               | NA       | NA       | Kinase-TM | Os06g0116100 | OsR498G0611512100.01.T03   | GAMBY-binding protein                                                                           |
| maker-6-augustus-gene-98.2-mRNA-1              | NA       | NA       | Kinase-TM | Os06g0283300 | OsR498G0612142700.01.T02   | probable leucine-rich repeat receptor-like serine/threonine-protein kinase At5g15730 isoform I1 |
| maker-7-augustus-gene-12.54-mRNA-1             | NA       | NA       | Kinase-TM | Os07g0131000 | OsR498G07131000.01.T01     | L-type lectin domain containing receptor kinase IV.1                                            |
| maker-7-augustus-gene-15.66-mRNA-1             | NA       | Japanica | Kinase-TM | Os07g0137800 | OsR498G0713481800.01.T01   | Proline-rich receptor-like protein kinase PERK4                                                 |
| maker-7-augustus-gene-164.31-mRNA-1            | NA       | NA       | Kinase-TM | NA           | NA                         | Serine/threonine-protein kinase SRK                                                             |
| maker-7-augustus-gene-167.38-mRNA-1            | NA       | Indica   | Kinase-TM | Os07g0472400 | OsR498G0714275700.01.T01   | probable serine/threonine-protein kinase sky1                                                   |
| maker-7-augustus-gene-17.67-mRNA-1             | NA       | NA       | Kinase-TM | Os06g0241100 | OsR498G0713492600.01.T02   | G-type lectin 5-receptor-like serine/threonine-protein kinase                                   |
| maker-7-augustus-gene-189.51-mRNA-1            | NA       | NA       | Kinase-TM | Os07g0507300 | OsR498G0714392600.01.T04   | germinal center kinase 1 isoform X3                                                             |
| maker-7-augustus-gene-206.0-mRNA-1             | NA       | Indica   | Kinase-TM | Os07g0535800 | OsR498G0714500300.01.T06   | Putative serine/threonine-specific protein kinase                                               |
| maker-7-augustus-gene-206.10-mRNA-1            | NA       | Indica   | Kinase-TM | Os07g0628700 | OsR498G0714502100.01.T01   | Cysteine-rich receptor-like protein kinase 8                                                    |
| maker-7-augustus-gene-208.4-mRNA-1             | NA       | NA       | Kinase-TM | Os07g0537000 | OsR498G0714501700.01.T01   | Receptor-like serine-threonine protein kinase                                                   |
| maker-7-augustus-gene-206.5-mRNA-1             | NA       | NA       | Kinase-TM | 0            | OsR498G0714502900.01.T01   | G-type lectin 5-receptor-like serine/threonine-protein kinase                                   |
| maker-7-augustus-gene-207.50-mRNA-1            | NA       | NA       | Kinase-TM | 0            | OsR498G0714503300.01.T01   | Cysteine-rich receptor-like protein kinase 8                                                    |
| maker-7-augustus-gene-207.52-mRNA-1            | NA       | NA       | Kinase-TM | Os07g0537900 | OsR498G0714503300.01.T01   | Cysteine-rich receptor-like protein kinase 8                                                    |
| maker-7-augustus-gene-207.62-mRNA-1            | NA       | NA       | Kinase-TM | Os07g0537500 | OsR498G0714502600.01.T01   | Cysteine-rich receptor-like protein kinase 6                                                    |
| maker-7-augustus-gene-207.66-mRNA-1            | NA       | NA       | Kinase-TM | Os07g0538200 | OsR498G0714504000.01.T01   | Cysteine-rich receptor-like protein kinase 6                                                    |
| maker-7-augustus-gene-208.11-mRNA-1            | NA       | NA       | Kinase-TM | Os07g0537000 | OsR498G0714501000.01.T01   | Cysteine-rich receptor-like protein kinase 8                                                    |
| maker-7-augustus-gene-208.36-mRNA-1            | NA       | NA       | Kinase-TM | Os07g0541000 | OsR498G0714516300.01.T01   | Receptor-like serine-threonine protein kinase                                                   |
| maker-7-augustus-gene-209.11-mRNA-1            | NA       | NA       | Kinase-TM | Os07g0540800 | OsR498G0714515800.01.T01   | Receptor-like serine-threonine protein kinase                                                   |
| maker-7-augustus-gene-209.12-mRNA-1            | NA       | NA       | Kinase-TM | Os07g0541000 | OsR498G0714516800.01.T01   | Cysteine-rich receptor-like protein kinase 10                                                   |
| maker-7-augustus-gene-209.26-mRNA-1            | NA       | NA       | Kinase-TM | Os07g0541800 | OsR498G0714517600.01.T05   | Membrane binding protein                                                                        |
| maker-7-augustus-gene-209.30-mRNA-1            | NA       | NA       | Kinase-TM | Os07g0541900 | OsR498G0714517800.01.T05   | Cysteine-rich receptor-like protein kinase 10                                                   |
| maker-7-augustus-gene-210.47-mRNA-1            | NA       | NA       | Kinase-TM | Os07g0542400 | OsR498G0714519200.01.T05   | Putative Zea mays retrotransposon Ople-2                                                        |
| maker-7-augustus-gene-22.17-mRNA-1             | NA       | NA       | Kinase-TM | Os07g0150700 | OsR498G0713521400.01.T01   | Non-specific serine/threonine protein kinase                                                    |
| maker-7-augustus-gene-228.2-mRNA-1             | NA       | NA       | Kinase-TM | Os07g0572800 | OsR498G0714612300.01.T06   | Serine/threonine-protein kinase WNK1                                                            |
| maker-7-augustus-gene-250.8-mRNA-1             | NA       | NA       | Kinase-TM | Os07g0613500 | OsR498G0714745300.01.RIPK  | Serine/threonine-protein kinase RPK                                                             |
| maker-7-augustus-gene-280.12-mRNA-1            | NA       | Indica   | Kinase-TM | Os03g0349200 | OsR498G0714922100.01.T01   | probable serine/threonine-protein kinase At1g54610                                              |
| maker-7-augustus-gene-280.16-mRNA-1            | NA       | NA       | Kinase-TM | 0            | OsR498G0714923700.01.T02   | Receptor-like serine/threonine protein kinase                                                   |
| maker-7-augustus-gene-280.42-mRNA-1            | NA       | NA       | Kinase-TM | Os07g0668900 | OsR498G0714925200.01.T01   | Serine/threonine-protein kinase PBL27                                                           |
| maker-7-augustus-gene-36.35-mRNA-1             | NA       | NA       | Kinase-TM | Os07g0176600 | OsR498G0713618700.01.T01   | Serine/threonine-protein kinase Nek2                                                            |
| maker-7-augustus-gene-4.20-mRNA-1              | NA       | NA       | Kinase-TM | Os07g0114400 | OsR498G0713403200.01.T01   | CK2 protein kinase alpha 4                                                                      |
| maker-7-augustus-gene-47.32-mRNA-1             | NA       | NA       | Kinase-TM | Os07g0194100 | OsR498G0713681500.01.T01   | Non-specific serine/threonine protein kinase                                                    |
| maker-8-augustus-gene-0.31-mRNA-1              | NA       | Japanica | Kinase-TM | Os08g0124900 | OsR498G0815100800.01.T01   | Putative receptor-type protein kinase LRK1                                                      |
| maker-8-augustus-gene-114.50-mRNA-1            | NA       | Indica   | Kinase-TM | Os08g0319700 | OsR498G0815446200.01.T03   | Phytosulfokine receptor                                                                         |
| maker-8-augustus-gene-138.24-mRNA-1            | NA       | NA       | Kinase-TM | Os08g0249100 | OsR498G0815539600.01.T01   | probable receptor-like serine/threonine-protein kinase At5g57670                                |
| maker-8-augustus-gene-138.26-mRNA-1            | NA       | NA       | Kinase-TM | Os08g0249100 | OsR498G0815539600.01.T01   | probable receptor-like serine/threonine-protein kinase At5g57670                                |
| maker-8-augustus-gene-158.8-mRNA-1             | NA       | NA       | Kinase-TM | Os08g0343000 | OsR498G0815840500.01.T03   | Proline-rich receptor-like protein kinase PBL14 isoform X5                                      |
| maker-8-augustus-gene-181.48-mRNA-1            | NA       | NA       | Kinase-TM | Os08g0365800 | OsR498G0815948800.01.T03   | Putative WAK family receptor-like protein kinase                                                |
| maker-8-augustus-gene-190.0-mRNA-1             | NA       | NA       | Kinase-TM | Os08g0374600 | OsR498G0815948800.01.T03   | tyrosinyl-regulated kinase-like                                                                 |
| maker-8-augustus-gene-252.2-mRNA-1             | NA       | NA       | Kinase-TM | Os08g0484600 | OsR498G0816337100.01.T01   | Serine/threonine-protein kinase OSK4                                                            |
| maker-8-augustus-gene-256.55-mRNA-1            | NA       | Japanica | Kinase-TM | Os08g0491200 | OsR498G0917684300.01.T03   | Serine/threonine-protein kinase DAPK1.1                                                         |
| maker-8-augustus-gene-261.3-mRNA-1             | NA       | Indica   | Kinase-TM | Os08g0501700 | OsR498G0816405900.01.T01   | Wall-associated kinase-like                                                                     |
| maker-8-augustus-gene-35.28-mRNA-1             | NA       | NA       | Kinase-TM | Os08g0157000 | OsR498G0815225900.01.T01   | Mitogen-activated protein kinase                                                                |
| maker-8-augustus-gene-46.39-mRNA-1             | NA       | Japanica | Kinase-TM | Os08g0176200 | OsR498G0815299300.01.T01   | LRR receptor kinase SERK2                                                                       |
| maker-8-augustus-gene-51.35-mRNA-1             | NA       | NA       | Kinase-TM | Os08g0224100 | OsR498G0815462500.01.T01   | Serine/threonine-protein kinase STY13                                                           |
| maker-8-augustus-gene-94.36-mRNA-1             | NA       | NA       | Kinase-TM | Os08g0249100 | OsR498G0815539600.01.T01   | probable receptor-like serine/threonine-protein kinase At5g57670                                |
| maker-9-augustus-gene-104.0-mRNA-1             | NA       | NA       | Kinase-TM | NA           | NA                         | Senescence-induced receptor-like serine/threonine-protein kinase                                |
| maker-9-augustus-gene-107.12-mRNA-1            | NA       | Japanica | Kinase-TM | Os09g0349100 | OsR498G0917214100.01.T01   | Serine/threonine-specific receptor protein kinase-like                                          |
| maker-9-augustus-gene-110.4-mRNA-1             | NA       | NA       | Kinase-TM | NA           | NA                         | L-type lectin domain containing receptor kinase IX.1                                            |
| maker-9-augustus-gene-112.7-mRNA-1             | NA       | NA       | Kinase-TM | Os09g0339000 | OsR498G0917194500.01.T01   | L-type lectin domain containing receptor kinase IX.1                                            |
| maker-9-augustus-gene-115.2-mRNA-1             | NA       | NA       | Kinase-TM | NA           | NA                         | Serine/threonine-specific receptor protein kinase-like                                          |
| maker-9-augustus-gene-116.0-mRNA-1             | NA       | Japanica | Kinase-TM | Os09g0356200 | OsR498G0917236300.01.T05   | Putative LRR receptor-like serine/threonine-protein kinase                                      |
| maker-9-augustus-gene-145.39-mRNA-1            | NA       | NA       | Kinase-TM | Os09g0408800 | OsR498G0917427900.01.T01   | Cysteine-rich receptor-like protein kinase 10                                                   |
| maker-9-augustus-gene-20.40-mRNA-1             | NA       | NA       | Kinase-TM | Os09g0123300 | OsR498G0916722500.01.T02   | Putative leucine-rich repeat receptor-like protein kinase At4g00330                             |
| maker-9-augustus-gene-210.13-mRNA-1            | NA       | Indica   | Kinase-TM | Os09g0654500 | OsR498G0917848400.01.T02   | Serine/threonine protein kinase                                                                 |
| maker-9-augustus-gene-216.0-mRNA-1             | NA       | NA       | Kinase-TM | Os09g0543800 | OsR498G0917897100.01.T01   | Serine/threonine protein kinase STY46                                                           |
| maker-9-augustus-gene-88.42-mRNA-1             | NA       | NA       | Kinase-TM | Os09g0315600 | OsR498G0917897100.01.T01   | L-type lectin domain containing receptor kinase IV.2                                            |
| augustus_masked-9-processed-gene-225.0-mRNA-1  | Japanica | NA       | Kinase-TM | Os09g0526200 | OsR498G0917953300.01.T02   | Wall-associated receptor kinase 3                                                               |
| maker-4-augustus-gene-283.19-mRNA-1            | Japanica | NA       | Kinase-TM | Os04g0660500 | OsR498G0409429000.01.T02   | MAP3K epsilon protein kinase 1                                                                  |
| maker-2-augustus-gene-44.2-mRNA-1              | Indica   | NA       | CC-Kinase | NA           | NA                         | Mitogen-activated protein kinase kinase kinase ANP1                                             |
| augustus-1-processed-gene-152.17-mRNA-1        | Japanica | NA       | CC-Kinase | Os10g0367700 | OsR498G1010962700.01.T05   | probable serine/threonine-protein kinase At1g54610                                              |
| augustus-5-processed-gene-5.3-mRNA-1           | Japanica | NA       | CC-Kinase | Os05g1008300 | OsR498G0505975990.01.T03   | Non-specific serine/threonine protein kinase                                                    |
| maker-2-augustus-gene-308.34-mRNA-1            | Japanica | NA       | CC-Kinase | NA           | NA                         | Non-specific serine/threonine protein kinase                                                    |
| maker-2-augustus-gene-389.0-mRNA-1             | Japanica | NA       | CC-Kinase | NA           | NA                         | U-box domain-containing protein 38                                                              |
| maker-3-augustus-gene-423.29-mRNA-1            | Japanica | NA       | CC-Kinase | NA           | NA                         | Homologous-pairing protein 2 homolog                                                            |
| maker-3-augustus-gene-429.41-mRNA-1            | Japanica | NA       | CC-Kinase | NA           | NA                         | Putative serine/threonine-protein kinase dyk2                                                   |
| maker-9-augustus-gene-62.59-mRNA-1             | Japanica | NA       | CC-Kinase | NA           | NA                         | Putative serine/threonine-protein kinase                                                        |
| maker-12-augustus-gene-233.9-mRNA-1            | NA       | NA       | CC-Kinase | Os12g0562500 | OsR498G1221845500.01.T01   | Putative serine/threonine-protein kinase recoc                                                  |
| maker-2-augustus-gene-9.40-mRNA-1              | NA       | NA       | CC-Kinase | Os02g0118200 | OsR498G0202854300.01.T01   | probable serine/threonine-protein kinase PIX13                                                  |
| maker-3-augustus-gene-162.14-mRNA-1            | NA       | Indica   | CC-Kinase | Os03g0349200 | OsR498G0305945000.01.T02   | probable serine/threonine-protein kinase At1g54610                                              |
| maker-9-augustus-gene-62.50-mRNA-1             | NA       | NA       | CC-Kinase | 0            | OsR498G0916904200.01.T03   | Serine/threonine protein kinase                                                                 |
| augustus-1-processed-gene-15.3-mRNA-1          | Indica   | NA       | Kinase    | NA           | NA                         | G-type lectin 5-receptor-like serine/threonine-protein kinase                                   |
| augustus-10-processed-gene-2.3-mRNA-1          | Indica   | NA       | Kinase    | Os10g0142600 | OsR498G1010091500.01.T01   | Receptor-like protein kinase FERONIA                                                            |
| augustus_masked-10-processed-gene-38.31-mRNA-1 | Indica   | Japanica | Kinase    | Os10g0157400 | OsR498G1018162400.01.T01   | Putative cyclin-dependent kinase F-2                                                            |
| augustus_masked-10-processed-gene-54.31-mRNA-1 | Indica   | Japanica | Kinase    | Os10g0174800 | OsR498G1018205000.01.T02   | Wall-associated receptor kinase                                                                 |
| augustus_masked-6-processed-gene-300.24-mRNA-1 | Indica   | Indica   | Kinase    | Os02g0623600 | OsR498G0613277600.01.T01   | Putative tyrosine-protein kinase, insulin-like receptor                                         |
| maker-1-augustus-gene-448.23-mRNA-1            | Indica   | NA       | Kinase    | NA           | NA                         | Cell division control protein 2                                                                 |
| maker-10-augustus-gene-111.62-mRNA-1           | Indica   | NA       | Kinase    | NA           | NA                         | Putative serine/threonine-protein kinase NAK                                                    |
| maker-11-augustus-gene-82.3-mRNA-1             | Indica   | NA       | Kinase    | NA           | NA                         | Retrosynapson protein, putative, LINE subclass                                                  |
| maker-3-augustus-gene-199.9-mRNA-1             | Indica   | NA       | Kinase    | NA           | NA                         | Serine/threonine-protein kinase CTR1                                                            |
| maker-5-augustus-gene-188.30-mRNA-1            | Indica   | Indica   | Kinase    | Os10g0936100 | OsR498G0510698900.01.T01   | Serine/threonine-protein kinase PBL27                                                           |
| maker-6-augustus-gene-301.39-mRNA-1            | Indica   | NA       | Kinase    | Os06g0708000 | OsR498G0613281300.01.T01   | Mitogen-activated protein kinase                                                                |
| maker-6-augustus-gene-304.20-mRNA-1            | Indica   | NA       | Kinase    | Os06g0714900 | OsR498G0613284000.01.T04   | probable serine/threonine-protein kinase PBL19                                                  |
| maker-6-augustus-gene-309.34-mRNA-1            | Indica   | NA       | Kinase    | Os06g0727400 | OsR498G0613334400.01.T01   | probable serine/threonine-protein kinase PIX13                                                  |
| maker-7-augustus-gene-181.8-mRNA-1             | Indica   | NA       | Kinase    | NA           | NA                         | Receptor-like serine/threonine protein kinase                                                   |
| augustus-1-processed-gene-73.17-mRNA-1         | Japanica | NA       | Kinase    | Os10g0231500 | OsR498G1010081100.01.T06   | Casein kinase (Serine/threonine/tyrosine protein kinase)                                        |
| augustus-2-processed-gene-371.37-mRNA-1        | Japanica | NA       | Kinase    | Os02g0787300 | OsR498G0204906600.01.T01   | MAP kinase kinase                                                                               |
| augustus-3-processed-gene-493.97-mRNA-1        | Japanica | NA       | Kinase    | Os03g0844100 | OsR498G0307355200.01.T01   | Tyrosine-protein kinase                                                                         |
| augustus-7-processed-gene-294.64-mRNA-1        | Japanica | NA       | Kinase    | Os07g0695300 | OsR498G0715020300.01.T01   | Putative serine/threonine-protein kinase PBL7                                                   |
| augustus_masked-11-processed-gene-2.65-mRNA-1  | Japanica | NA       | Kinase    | Os11g0121800 | OsR498G1018161800.01.T01   | Serine/threonine-protein kinase At5g01020                                                       |
| augustus_masked-3-processed-gene-281.48-mRNA-1 | Japanica | NA       | Kinase    | Os09g0374600 | OsR498G0910181600.01.T01   | Putative leucine-rich repeat receptor-like protein kinase                                       |
| augustus_masked-1-processed-gene-458.51-mRNA-1 | Japanica | Indica   | Kinase    | Os04g0531500 | OsR498G040307125400.01.T01 | Non-specific serine/threonine protein kinase                                                    |
| augustus_masked-5-processed-gene-304.15-mRNA-1 | Japanica | NA       | Kinase    | Os05g0588300 | OsR498G0511432300.01.T01   | Receptor-like protein kinase 1-like                                                             |
| maker-1-augustus-gene-186.38-mRNA-1            | Japanica | NA       | Kinase    | NA           | NA                         | MAPKK                                                                                           |
| maker-1-augustus-gene-236.19-mRNA-1            | Japanica | NA       | Kinase    | Os10g0388500 | OsR498G101429400.01.T01    | Putative serine/threonine-protein kinase PIX7                                                   |
| maker-1-augustus-gene-246.20-mRNA-1            | Japanica | NA       | Kinase    | Os10g0499500 | OsR498G1018161800.01.T01   | Putative MAPKKK family protein kinase                                                           |
| maker-1-augustus-gene-301.12-mRNA-1            | Japanica | Indica   | Kinase    | Os05g0593800 | OsR498G05101862300.01.T01  | Serine/threonine-protein kinase                                                                 |
| maker-1-augustus-gene-341.44-mRNA-1            | Japanica | NA       | Kinase    | NA           | NA                         | probable serine/threonine-protein kinase PBL23                                                  |
| maker-1-augustus-gene-488.40-mRNA-1            | Japanica | NA       | Kinase    | Os01g0936100 | OsR498G0102657500.01.T01   | Serine/threonine-protein kinase PBL27                                                           |
| maker-10-augustus-gene-106.13-mRNA-1           | Japanica | NA       | Kinase    | Os10g0431900 | OsR498G1018176800.01.T02   | Probable serine/threonine-protein kinase PBL16                                                  |
| maker-10-augustus-gene-169.27-mRNA-1           | Japanica | NA       | Kinase    | Os10g0476300 | OsR498G1018891700.01.T01   | Casein kinase I isoform epsilon                                                                 |
| maker-10-augustus-gene-190.66-mRNA-1           | Japanica | NA       | Kinase    | Os03g0113000 | OsR498G0305404800.01.T01   | Putative receptor protein kinase                                                                |
| maker-10-augustus-gene-75.0-mRNA-1             | Japanica | NA       | Kinase    | NA           | NA                         | Putative receptor-like protein kinase                                                           |
| maker-11-augustus-gene-187.12-mRNA-1           | Japanica | Japanica | Kinase    | Os11g0568800 | OsR498G1120381200.01.T01   | Protein kinase domain-containing protein                                                        |
| maker-11-augustus-gene-2.19-mRNA-1             | Japanica | NA       | Kinase    | Os11g0121400 | OsR498G1119338800.01.T01   | Serine/threonine-protein kinase NAK                                                             |
| maker-11-augustus-gene-2.20-mRNA-1             | Japanica | NA       | Kinase    | NA           | NA                         | Putative serine/threonine-protein kinase PBL8                                                   |
| maker-11-augustus-gene-236.36-mRNA-1           | Japanica | NA       | Kinase    | NA           | NA                         | Major disease resistance protein Xa4                                                            |
| maker-11-augustus-gene-82.2-mRNA-1             | Japanica | NA       | Kinase    | NA           | NA                         | Retrosynapson protein, putative, LINE subclass                                                  |
| maker-12-augustus-gene-10.62-mRNA-1            | Japanica | NA       | Kinase    | NA           | NA                         | Serine-threonine kinase STX11                                                                   |
| maker-12-augustus-gene-114.0-mRNA-1            | Japanica | Indica   | Kinase    | Os05g0511400 | OsR498G1221346100.01.T01   | Serine/threonine-protein kinase CBK1                                                            |
| maker-12-augustus-gene-185.37-mRNA-1           | Japanica | Indica   | Kinase    | Os12g0480200 | OsR498G1221602400.01.T01   | Serine/threonine-protein kinase KIPK                                                            |
| maker-12-augustus-gene-259.0-mRNA-1            | Japanica | NA       | Kinase    | Os12g0605900 | OsR498G122269500.01.T01    | CXC domain-containing T501-like protein 1                                                       |
| maker-12-augustus-gene-5.16-mRNA-1             | Japanica | Japanica |           |              |                            |                                                                                                 |

|                                                |          |          |          |               |                          |                                                                                               |
|------------------------------------------------|----------|----------|----------|---------------|--------------------------|-----------------------------------------------------------------------------------------------|
| maker-5-augustus-gene-233.10-mRNA-1            | Japonica | Indica   | Kinase   | Os11g0620500  | OsR498G0510972100.01.T01 | Pollen receptor-like kinase 6                                                                 |
| maker-5-augustus-gene-240.19-mRNA-1            | Japonica | Indica   | Kinase   | Os05g0466900  | OsR498G0511007800.01.T01 | Putative serine/threonine-protein kinase dyrk2                                                |
| maker-5-augustus-gene-248.28-mRNA-1            | Japonica | NA       | Kinase   | Os05g0511400  | OsR498G051165400.01.T04  | G-type lectin 5-receptor-like serine/threonine-protein kinase                                 |
| maker-6-augustus-gene-130.2-mRNA-1             | Japonica | NA       | Kinase   | Os06g0334400  | OsR498G0612552700.01.T02 | Cyclin-dependent kinase                                                                       |
| maker-6-augustus-gene-167.6-mRNA-1             | Japonica | Indica   | Kinase   | Os03g0568800  | OsR498G0612359600.01.T01 | Proline-rich receptor-like protein kinase PERK8                                               |
| maker-6-augustus-gene-260.32-mRNA-1            | Japonica | NA       | Kinase   | Os06g0636600  | OsR498G0613026300.01.T03 | Serine/threonine-protein kinase                                                               |
| maker-6-augustus-gene-291.61-mRNA-1            | Japonica | NA       | Kinase   | Os06g0693900  |                          | Cyclin dependent protein kinase                                                               |
| maker-7-augustus-gene-205.7-mRNA-1             | Japonica | NA       | Kinase   |               | OsR498G0714495300.01.T01 | G-type lectin 5-receptor-like serine/threonine-protein kinase                                 |
| maker-7-augustus-gene-234.9-mRNA-1             | Japonica | NA       | Kinase   | Os07g0584100  | OsR498G0714647100.01.T01 | probable serine/threonine-protein kinase WNK11                                                |
| maker-7-augustus-gene-240.62-mRNA-1            | Japonica | NA       | Kinase   | Os07g0596600  | OsR498G0714693400.01.T01 | Putative serine/threonine-protein kinase                                                      |
| maker-7-augustus-gene-287.22-mRNA-1            | Japonica | Indica   | Kinase   | Os07g0680900  | OsR498G0714963900.01.T06 | Non-specific serine/threonine-protein kinase                                                  |
| maker-7-augustus-gene-290.51-mRNA-1            | Japonica | Indica   | Kinase   | Os07g0686800  | OsR498G0714991100.01.T01 | Putative serine/threonine-protein kinase PBL18                                                |
| maker-7-augustus-gene-40.80-mRNA-1             | Japonica | NA       | Kinase   | Os07g06185000 | OsR498G0713644600.01.T01 | Putative serine/threonine-protein kinase WNK9 (Fragment)                                      |
| maker-8-augustus-gene-237.9-mRNA-1             | Japonica | NA       | Kinase   |               | OsR498G0816229900.01.T01 | Cyclin-dependent kinase C-3                                                                   |
| maker-8-augustus-gene-237.9-mRNA-1             | Japonica | NA       | Kinase   | Os08g0457400  | OsR498G0816238400.01.T01 | Serine/threonine-protein kinase RPKP                                                          |
| maker-9-augustus-gene-111.31-mRNA-1            | Japonica | Japonica | Kinase   | Os09g0341100  | OsR498G0917194300.01.T01 | L-type lectin-domain containing receptor kinase IX.1                                          |
| maker-9-augustus-gene-119.5-mRNA-1             | Japonica | Indica   | Kinase   | Os09g0361100  | OsR498G0917245900.01.T01 | Putative serine/threonine-protein kinase PIX7                                                 |
| maker-9-augustus-gene-180.47-mRNA-1            | Japonica | NA       | Kinase   | Os09g0471200  | OsR498G0917660800.01.T02 | Wall-associated receptor kinase 3                                                             |
| maker-9-augustus-gene-49.9-mRNA-1              | Japonica | NA       | Kinase   | Os09g0258500  | OsR498G0916850600.01.T01 | Serine/threonine-protein kinase D6PKL2                                                        |
| augustus-10-processed-gene-29.3-mRNA-1         | NA       | NA       | Kinase   | Os10g0142600  |                          | Receptor-like protein kinase FERONIA                                                          |
| augustus-12-processed-gene-209.10-mRNA-1       | NA       | NA       | Kinase   | 0             | OsR498G1221718300.01.T01 | probable serine/threonine-protein kinase PIX13 isoform X2                                     |
| augustus-9-processed-gene-126.24-mRNA-1        | NA       | Japonica | Kinase   | Os09g0373800  | OsR498G0917660800.01.T02 | Putative wall-associated kinase 4                                                             |
| augustus_masked-10-processed-gene-132.3-mRNA-1 | NA       | NA       | Kinase   | Os04g0125700  | OsR498G0407520900.01.T01 | Non-specific serine/threonine-protein kinase                                                  |
| augustus_masked-6-processed-gene-300.24-mRNA-1 | NA       | Indica   | Kinase   | Os02g0623600  | OsR498G0613277600.01.T01 | Putative tyrosine-protein kinase, insulin-like receptor                                       |
| augustus_masked-6-processed-gene-312.31-mRNA-1 | NA       | Indica   | Kinase   | Os02g0623600  | OsR498G0613277600.01.T01 | Putative tyrosine-protein kinase, insulin-like receptor                                       |
| augustus_masked-6-processed-gene-35.26-mRNA-1  | NA       | NA       | Kinase   | 0             | OsR498G0101892200.01.T01 | C2H2-type domain-containing protein                                                           |
| maker-1-augustus-gene-207.34-mRNA-1            | NA       | NA       | Kinase   | Os01g0541900  | OsR498G0101225400.01.T04 | Kinase family protein / protein phosphatase 3C (PP2C) family protein isoform 1                |
| maker-1-augustus-gene-243.42-mRNA-1            | NA       | Indica   | Kinase   | Os01g0601200  | OsR498G0101477700.01.T01 | Serine/threonine-protein kinase                                                               |
| maker-1-augustus-gene-381.17-mRNA-1            | NA       | NA       | Kinase   | 0             | OsR498G0102391800.01.T03 | Serine/threonine-protein kinase Nek5                                                          |
| maker-1-augustus-gene-385.27-mRNA-1            | NA       | NA       | Kinase   | Os01g0872800  | OsR498G0102422600.01.T01 | Non-specific serine/threonine-protein kinase                                                  |
| maker-1-augustus-gene-397.48-mRNA-1            | NA       | Indica   | Kinase   | Os08g0512600  | OsR498G0613277600.01.T01 | Cell division control protein 2                                                               |
| maker-1-augustus-gene-432.6-mRNA-1             | NA       | NA       | Kinase   | 0             | OsR498G0102391800.01.T03 | Serine/threonine-protein kinase Nek5                                                          |
| maker-1-augustus-gene-436.78-mRNA-1            | NA       | NA       | Kinase   | Os01g0872800  | OsR498G0102422600.01.T01 | Non-specific serine/threonine-protein kinase                                                  |
| maker-1-augustus-gene-448.23-mRNA-1            | NA       | NA       | Kinase   | 0             | OsR498G0102507600.01.T01 | Cell division control protein 2                                                               |
| maker-11-augustus-gene-256.36-mRNA-1           | NA       | NA       | Kinase   |               |                          | Major disease resistance protein Xa4                                                          |
| maker-11-augustus-gene-82.2-mRNA-1             | NA       | NA       | Kinase   |               |                          | Retrotransposon protein, putative, LINE subclass                                              |
| maker-12-augustus-gene-114.0-mRNA-1            | NA       | Indica   | Kinase   | Os05g0511400  | OsR498G1221346100.01.T01 | Serine/threonine-protein kinase CBK1                                                          |
| maker-12-augustus-gene-258.16-mRNA-1           | NA       | NA       | Kinase   | Os12g0604700  | OsR498G1222065800.01.T02 | Serine/threonine-protein kinase Nek2                                                          |
| maker-12-augustus-gene-282.64-mRNA-1           | NA       | NA       | Kinase   | Os04g0559800  | OsR498G0409066400.01.T05 | Putative MAPKKK family protein kinase isoform 1                                               |
| maker-2-augustus-gene-12.47-mRNA-1             | NA       | Indica   | Kinase   | Os02g0123100  | OsR498G0202873300.01.T01 | Cell division control protein 2 like A                                                        |
| maker-2-augustus-gene-18.33-mRNA-1             | NA       | NA       | Kinase   | Os02g0135200  | OsR498G0202916400.01.T05 | Mitogen-activated protein kinase                                                              |
| maker-2-augustus-gene-19.16-mRNA-1             | NA       | NA       | Kinase   | 0             | OsR498G0202916600.01.T01 | Putative cell cycle regulatory protein kinase Wee1 (Fragment)                                 |
| maker-2-augustus-gene-238.40-mRNA-1            | NA       | NA       | Kinase   | Os02g0402100  | OsR498G0204253300.01.T07 | Cyclin-dependent kinase G-1                                                                   |
| maker-2-augustus-gene-333.40-mRNA-1            | NA       | NA       | Kinase   | Os06g0663900  | OsR498G0613121100.01.T03 | Receptor-like cytosolic serine/threonine-protein kinase RBK1                                  |
| maker-2-augustus-gene-334.0-mRNA-1             | NA       | NA       | Kinase   | Os06g0663200  | OsR498G0613117600.01.T02 | Putative serine/threonine-protein kinase PBL17                                                |
| maker-2-augustus-gene-48.69-mRNA-1             | NA       | NA       | Kinase   | Os02g0186500  | OsR498G0203116200.01.T02 | Mitogen-activated protein kinase kinase                                                       |
| maker-3-augustus-gene-199.0-mRNA-1             | NA       | NA       | Kinase   | 0             | OsR498G0306131300.01.T02 | Serine/threonine-protein kinase CTR1                                                          |
| maker-4-augustus-gene-144.0-mRNA-1             | NA       | NA       | Kinase   | Os04g0437600  | OsR498G0408619300.01.T01 | Mitogen-activated protein kinase kinase kinase YODA                                           |
| maker-4-augustus-gene-227.29-mRNA-1            | NA       | NA       | Kinase   | Os04g0559800  | OsR498G0409066400.01.T05 | Putative MAPKKK family protein kinase isoform 1                                               |
| maker-4-augustus-gene-259.31-mRNA-1            | NA       | Japonica | Kinase   | Os04g0616400  | OsR498G0409282400.01.T01 | Leucine-rich repeat transmembrane protein kinase                                              |
| maker-5-augustus-gene-98.24-mRNA-1             | NA       | NA       | Kinase   | Os04g0291900  | OsR498G0407958200.01.T01 | Non-specific serine/threonine-protein kinase                                                  |
| maker-6-augustus-gene-275.10-mRNA-1            | NA       | NA       | Kinase   | Os06g0663200  | OsR498G0613117600.01.T02 | Putative serine/threonine-protein kinase PBL17                                                |
| maker-6-augustus-gene-276.41-mRNA-1            | NA       | NA       | Kinase   | Os06g0663900  | OsR498G0613121100.01.T03 | Receptor-like cytosolic serine/threonine-protein kinase RBK1                                  |
| maker-7-augustus-gene-205.7-mRNA-1             | NA       | NA       | Kinase   | 0             | OsR498G0714495300.01.T01 | C-type lectin 5-receptor-like serine/threonine-protein kinase                                 |
| maker-8-augustus-gene-59.0-mRNA-1              | NA       | NA       | Kinase   | Os08g0200500  | OsR498G0815381500.01.T04 | Serine/threonine-protein kinase receptor                                                      |
| maker-8-augustus-gene-69.0-mRNA-1              | NA       | NA       | Kinase   | Os08g0200500  | OsR498G0815381500.01.T04 | Serine/threonine-protein kinase receptor                                                      |
| maker-9-augustus-gene-184.31-mRNA-1            | NA       | NA       | Kinase   | Os09g0478500  | OsR498G0917684300.01.T03 | Serine/threonine-protein kinase D6PKL1                                                        |
| maker-9-augustus-gene-211.19-mRNA-1            | NA       | NA       | Kinase   | Os09g0533600  | OsR498G0917854200.01.T01 | probable serine/threonine-protein kinase PBL19                                                |
| maker-1-augustus-gene-181.10-mRNA-1            | Japonica | NA       | NRAMP6   | Os01g0503400  | OsR498G0101068400.01.T03 | Metal transporter                                                                             |
| maker-9-augustus-gene-460.78-mRNA-1            | Japonica | NA       | ONAC066  | Os03g0777000  | OsR498G0307142500.01.T01 | Transcription factor JUNGBRUNNEN 1                                                            |
| maker-11-augustus-gene-18.28-mRNA-1            | Japonica | NA       | NAC17    | Os11g0154500  | OsR498G1119437300.01.T01 | NAC domain-containing protein 90                                                              |
| maker-2-augustus-gene-142.5-mRNA-1             | Japonica | Indica   | OsSNAP32 | Os02g0437200  | OsR498G0203643200.01.T06 | SNAPous protein SNAP33                                                                        |
| augustus_masked-3-processed-gene-439.14-mRNA-1 | Japonica | Indica   | OsVSP121 | Os03g0787000  | OsR498G0307007300.01.T01 | Syntaxin-related protein KNOLLE                                                               |
| maker-1-augustus-gene-487.26-mRNA-1            | Japonica | NA       | PIR7A    | Os01g0934900  | OsR498G0102650800.01.T03 | AB hydrolase-1 domain-containing protein (Fragment)                                           |
| maker-1-augustus-gene-487.25-mRNA-1            | Japonica | NA       | PIR7B    | Os01g0934800  | OsR498G0102650800.01.T01 | AB hydrolase-1 domain-containing protein                                                      |
| maker-3-augustus-gene-17.61-mRNA-1             | Japonica | Japonica | RAI1     | Os03g0135700  | OsR498G0305187800.01.T01 | BHLH transcription factor                                                                     |
| maker-10-augustus-gene-175.19-mRNA-1           | Japonica | NA       | TPR1     | Os10g0486900  | OsR498G1018945500.01.T01 | Tetratricopeptide repeat protein 1                                                            |
| maker-4-augustus-gene-235.33-mRNA-1            | Japonica | NA       | CCSD     | Os04g0573200  | OsR498G0409117900.01.T03 | Putative superoxide dismutase, copper/zinc binding domain, heavy metal-associated domain, HMA |
| augustus-2-processed-gene-15.68-mRNA-1         | NA       | NA       | CC-TM    | Os02g0129800  |                          | Response to low sulfur 3                                                                      |
| maker-3-augustus-gene-162.5-mRNA-1             | Japonica | NA       | CSO1     | Os03g0315500  | OsR498G0305951300.01.T01 | Superoxide dismutase                                                                          |
| maker-6-augustus-gene-304.4-mRNA-1             | Indica   | NA       | TM       | Os06g0714500  | OsR498G0613301300.01.T01 | ATPase family AAA domain-containing protein 1-A                                               |
| maker-3-augustus-gene-457.9-mRNA-1             | Japonica | NA       | TM       | Os03g0769600  | OsR498G0307113800.01.T02 | C-type cytochrome synthesis protein1                                                          |
| maker-9-augustus-gene-201.47-mRNA-1            | Japonica | NA       | TM       | Os09g0515500  | OsR498G0917797500.01.T01 | Tr-type G domain-containing protein (Fragment)                                                |
| maker-7-augustus-gene-224.48-mRNA-1            | Japonica | Indica   | TIR      | Os07g0566800  | OsR498G0714593200.01.T01 | TIR domain-containing protein (Fragment)                                                      |
| maker-3-augustus-gene-263.0-mRNA-1             | NA       | NA       | TIR      | Os03g0626400  | OsR498G0306573300.01.T02 | B3 domain-containing protein (Fragment)                                                       |
| maker-3-augustus-gene-272.3-mRNA-1             | NA       | NA       | TIR      | Os03g0626400  | OsR498G0306573300.01.T02 | B3 domain-containing protein (Fragment)                                                       |
| maker-5-augustus-gene-177.84-mRNA-1            | Japonica | NA       | TIR      | Os05g0358500  | OsR498G0510639400.01.T04 | PPM-type phosphatase domain-containing protein                                                |
| augustus_masked-1-processed-gene-327.6-mRNA-1  | Japonica | NA       | TIR-TM   | Os01g0760400  | OsR498G0102039800.01.T01 | ADP-ribosyl cyclase/cyclic ADP-ribose hydrolase                                               |
