# Supplementary material for: Development and Genome-Wide Analysis of a Blast-Resistant japonica Rice Variety
Source: MDPI journal article supplement (doi:10.3390/plants12203536), 2023-10-11
Supplement: s1 [file s1]

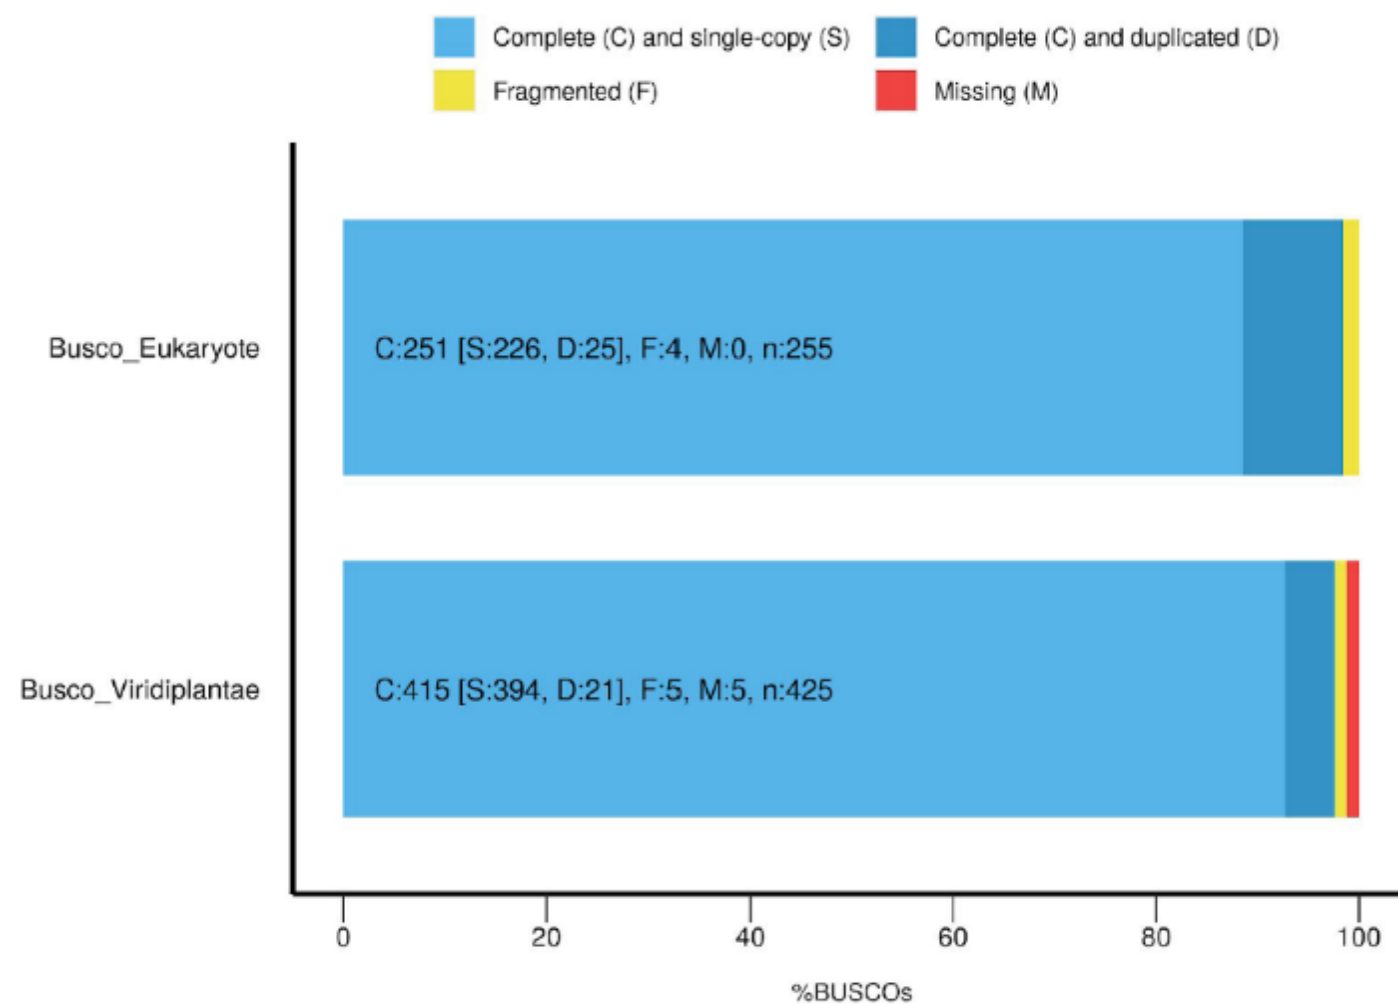

**Figure S2.** Graphical representation of results obtained on the BUSCO analysis using the Eukaryote (top) and Viridiplantae (bottom) databases. The percentage of completeness was 98,4% and 97,6%, respectively. C, complete; S, single copy; D, duplicated; F, fragmented; M, missing.
