# Supplementary material for: Development and Genome-Wide Analysis of a Blast-Resistant japonica Rice Variety
Source: MDPI journal article supplement (doi:10.3390/plants12203536), 2023-10-11
Supplement: s1 [file s1]

**A**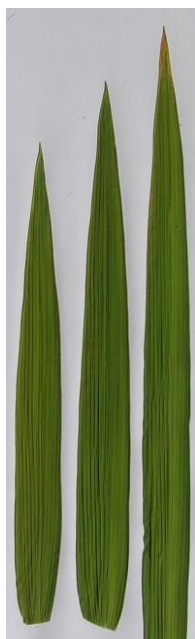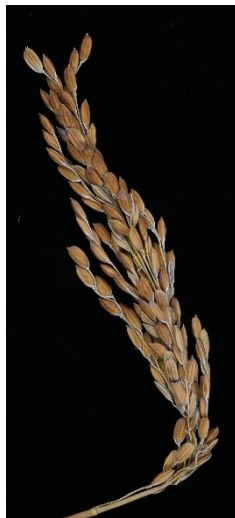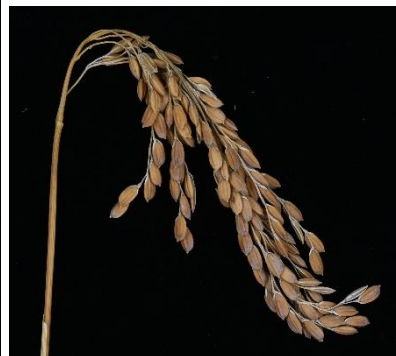**B**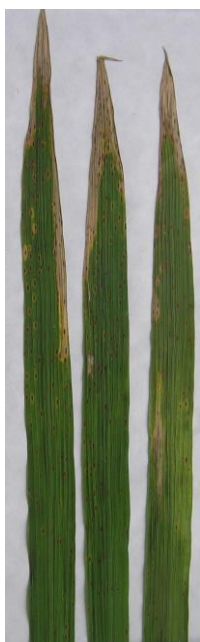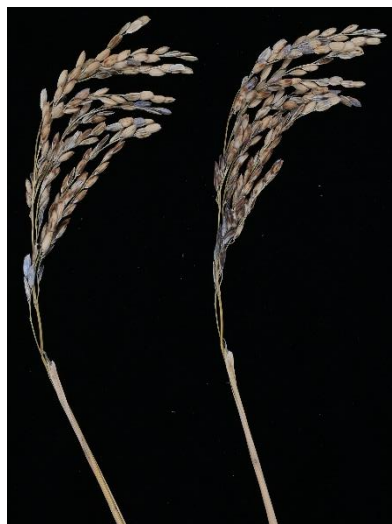

Figure S1. Evaluation of leaf and panicle blast resistance of COPSEMAR9 plants under natural infection conditions (field trial carried out in year 2). Representative images of leaves and panicles of COPSEMAR9 (A) and Baixet (B) plants.
