# Supplementary material for: Development and Genome-Wide Analysis of a Blast-Resistant japonica Rice Variety
Source: MDPI journal article supplement (doi:10.3390/plants12203536), 2023-10-11
Supplement: s1 [file s1]

**Supplemental Table S2. Genes identified in the genome of COPSEMAR9.** A. Genes identified by the variant calling analysis (Assignment Variants) or bit score difference (Assignment Similarity) are listed and assigned as *indica* or *japonica* genes.

| Locus                                   | Assignment Variants | Assignment Similarity | Resistance Gene Class | Japonica Locus | Indica Locus             | Description                                                      |
|-----------------------------------------|---------------------|-----------------------|-----------------------|----------------|--------------------------|------------------------------------------------------------------|
| augustus-1-processed-gene-15.2-mRNA-1   | Indica              | Japonica              |                       | Os01g0127600   | OsR498G0100091300.01.T01 |                                                                  |
| augustus-1-processed-gene-15.3-mRNA-1   | Indica              | NA                    | Kinase                |                | OsR498G0100091500.01.T01 | G-type lectin 5-receptor-like serine/threonine-protein kinase    |
| augustus-1-processed-gene-17.20-mRNA-1  | Indica              | NA                    |                       | Os01g0131300   | OsR498G0100108700.01.T01 | PORR domain-containing protein                                   |
| augustus-1-processed-gene-17.23-mRNA-1  | Indica              | NA                    |                       | Os01g0131600   | OsR498G0100109900.01.T06 | Pathogenesis-related transcriptional activator PTI6              |
| augustus-1-processed-gene-18.41-mRNA-1  | Indica              | NA                    |                       | Os02g0452800   | OsR498G0714367900.01.T01 | Epimerase domain-containing protein                              |
| augustus-1-processed-gene-19.26-mRNA-1  | Indica              | NA                    |                       | Os01g0135800   | OsR498G0100121300.01.T01 | 16.9 kDa class I heat shock protein 3                            |
| augustus-1-processed-gene-19.37-mRNA-1  | Indica              | Indica                |                       | Os01g0134800   | OsR498G0100119800.01.T01 | Endo-1,4-beta-xylanase                                           |
| augustus-1-processed-gene-19.38-mRNA-1  | Indica              | Indica                |                       | Os01g0134900   | OsR498G0100120000.01.T01 | Endo-1,4-beta-xylanase                                           |
| augustus-1-processed-gene-19.42-mRNA-1  | Indica              | NA                    |                       | Os01g0136200   | OsR498G0100124300.01.T01 | Class I heat shock protein 1                                     |
| augustus-1-processed-gene-21.29-mRNA-1  | Indica              | NA                    |                       |                |                          | WAK1-OsWAK receptor-like cytoplasmic kinase (OsWAK-RLCK)         |
| augustus-1-processed-gene-21.32-mRNA-1  | Indica              | NA                    |                       | Os01g0138300   | OsR498G0100133900.01.T01 | Putative serine/threonine-protein kinase                         |
| augustus-1-processed-gene-21.48-mRNA-1  | Indica              | NA                    |                       | Os01g0139600   | OsR498G0100138300.01.T01 | Lipid phosphate phosphatase                                      |
| augustus-1-processed-gene-222.16-mRNA-1 | Indica              | Japonica              |                       | Os01g0564300   | OsR498G0101347500.01.T01 | Peptidylprolyl isomerase                                         |
| augustus-1-processed-gene-23.56-mRNA-1  | Indica              | Japonica              |                       | Os01g0141700   | OsR498G0100150400.01.T02 | Protein DAMAGED DNA-BINDING 2 isoform A                          |
| augustus-1-processed-gene-23.61-mRNA-1  | Indica              | Indica                |                       | Os02g0547100   | OsR498G0101158000.01.T01 | Transposon protein, putative, Mutator sub-class, expressed       |
| augustus-1-processed-gene-234.11-mRNA-1 | Indica              | NA                    |                       | Os01g0585200   | OsR498G0101417500.01.T01 | Glycerophosphocholine acyltransferase 1                          |
| augustus-1-processed-gene-260.34-mRNA-1 | Indica              | NA                    |                       | Os01g0633200   | OsR498G0101598900.01.T01 | Factor of DNA methylation 1                                      |
| augustus-1-processed-gene-28.37-mRNA-1  | Indica              | NA                    |                       | Os01g0151100   | OsR498G0100183100.01.T06 | Putative translation initiation factor IF-2                      |
| augustus-1-processed-gene-29.20-mRNA-1  | Indica              | NA                    |                       | Os01g0153800   | OsR498G0100193100.01.T01 | Putative carboxylesterase 15                                     |
| augustus-1-processed-gene-29.21-mRNA-1  | Indica              | NA                    |                       | Os01g0154300   | OsR498G0100194100.01.T01 | Ubiquitin-like domain-containing protein                         |
| augustus-1-processed-gene-30.34-mRNA-1  | Indica              | NA                    | Kinase-TM             | Os01g0155500   | OsR498G0100197900.01.T01 | Receptor-like protein kinase HERK 1                              |
| augustus-1-processed-gene-30.53-mRNA-1  | Indica              | NA                    |                       | Os01g0157200   |                          |                                                                  |
| augustus-1-processed-gene-30.54-mRNA-1  | Indica              | NA                    |                       |                | OsR498G0100202500.01.T01 |                                                                  |
| augustus-1-processed-gene-31.35-mRNA-1  | Indica              | Indica                |                       | Os05g0163100   | OsR498G0100208400.01.T01 | PHD finger protein ALFIN-LIKE 1-like                             |
| augustus-1-processed-gene-33.59-mRNA-1  | Indica              | NA                    |                       | Os01g0165000   | OsR498G0100216100.01.T03 | Dehydration-responsive element-binding protein 2                 |
| augustus-1-processed-gene-34.49-mRNA-1  | Indica              | Indica                |                       | Os01g0166700   | OsR498G0100220900.01.T02 | Sapoin-like type B, 1                                            |
| augustus-1-processed-gene-34.53-mRNA-1  | Indica              | NA                    |                       | Os01g0167400   | OsR498G0100222500.01.T01 | rRNA N-glycosidase                                               |
| augustus-1-processed-gene-351.41-mRNA-1 | Indica              | NA                    |                       |                | OsR498G0102186300.01.T01 |                                                                  |
| augustus-1-processed-gene-352.13-mRNA-1 | Indica              | NA                    |                       | Os01g0811200   | OsR498G0102193100.01.T01 | Serine-type endopeptidase inhibitor                              |
| augustus-1-processed-gene-352.14-mRNA-1 | Indica              | NA                    |                       | Os01g0811300   | OsR498G0102193500.01.T01 | Histone-lysine N-methyltransferase H3 lysine-9 specific SUVH3    |
| augustus-1-processed-gene-353.52-mRNA-1 | Indica              | NA                    |                       | Os01g0812200   | OsR498G0102197300.01.T01 | CMP/dCMP-type deaminase domain-containing protein (Fragment)     |
| augustus-1-processed-gene-353.68-mRNA-1 | Indica              | NA                    |                       | Os01g0813400   | OsR498G0102200300.01.T05 | ADP-ribosylation factor                                          |
| augustus-1-processed-gene-353.71-mRNA-1 | Indica              | Indica                |                       | Os01g0814100   | OsR498G0102202300.01.T01 | AAI domain-containing protein                                    |
| augustus-1-processed-gene-354.59-mRNA-1 | Indica              | NA                    |                       | Os01g0816000   | OsR498G0102207500.01.T01 | Pentatricopeptide repeat-containing protein mitochondrial        |
| augustus-1-processed-gene-355.34-mRNA-1 | Indica              | NA                    |                       | Os01g0816700   | OsR498G0102211100.01.T01 | L-ascorbate oxidase like                                         |
| augustus-1-processed-gene-359.17-mRNA-1 | Indica              | NA                    |                       |                | OsR498G0100075100.01.T01 | Epstein-Barr virus EBNA-1-like                                   |
| augustus-1-processed-gene-360.26-mRNA-1 | Indica              | NA                    |                       |                | OsR498G0102241700.01.T01 | Epidermal patterning factor-like protein 6-like                  |
| augustus-1-processed-gene-361.11-mRNA-1 | Indica              | NA                    |                       | Os01g0827500   | OsR498G0102253700.01.T05 | Exocyst complex component EXO70B1                                |
| augustus-1-processed-gene-361.12-mRNA-1 | Indica              | NA                    |                       | Os01g0827600   |                          | Exocyst subunit Exo70 family protein (Fragment)                  |
| augustus-1-processed-gene-361.13-mRNA-1 | Indica              | NA                    |                       | Os05g0473000   | OsR498G0511028200.01.T01 | Abscisic acid receptor 6                                         |
| augustus-1-processed-gene-362.10-mRNA-1 | Indica              | Indica                |                       | Os01g0829800   | OsR498G0102260500.01.T01 | Malate dehydrogenase                                             |
| augustus-1-processed-gene-362.11-mRNA-1 | Indica              | NA                    |                       | Os01g0830100   | OsR498G0102261300.01.T03 | Internal alternative NAD(P)H-ubiquinone oxidoreductase           |
| augustus-1-processed-gene-364.40-mRNA-1 | Indica              | NA                    |                       | Os01g0832900   | OsR498G0102273300.01.T03 | Dual specificity tyrosine-phosphorylation-regulated kinase mbk-1 |
| augustus-1-processed-gene-364.41-mRNA-1 | Indica              | NA                    |                       | Os01g0833000   |                          | Pentatricopeptide repeat-containing protein chloroplastic        |
| augustus-1-processed-gene-365.39-mRNA-1 | Indica              | NA                    |                       | Os01g0835900   | OsR498G0102286500.01.T01 | Multifunctional fusion protein                                   |
| augustus-1-processed-gene-366.1-mRNA-1  | Indica              | NA                    |                       | Os01g0836600   | OsR498G0102288300.01.T01 | ABC transporter domain-containing protein (Fragment)             |
| augustus-1-processed-gene-366.10-mRNA-1 | Indica              | NA                    |                       | Os01g0836900   |                          | probable membrane-associated kinase regulator 4                  |
| augustus-1-processed-gene-367.49-mRNA-1 | Indica              | NA                    |                       | Os01g0839400   | OsR498G0102299500.01.T01 | Pentatricopeptide repeat-containing protein mitochondrial        |
| augustus-1-processed-gene-45.5-mRNA-1   | Indica              | NA                    |                       |                | OsR498G0100283300.01.T01 | Alkane hydroxylase MAH1                                          |
| augustus-1-processed-gene-46.17-mRNA-1  | Indica              | NA                    |                       | Os01g0186600   | OsR498G0100291700.01.T01 |                                                                  |
| augustus-1-processed-gene-46.8-mRNA-1   | Indica              | NA                    |                       | Os01g0658300   |                          | Glutaminyl-tRNA synthetase                                       |
| augustus-1-processed-gene-470.17-mRNA-1 | Indica              | NA                    |                       | Os01g0905700   | OsR498G0102537700.01.T01 | peroxisome biogenesis factor 10-like                             |
| augustus-1-processed-gene-472.32-mRNA-1 | Indica              | NA                    |                       | Os01g0908800   | OsR498G0102549700.01.T02 | Fertility restorer homologue A-like                              |
| augustus-1-processed-gene-474.14-mRNA-1 | Indica              | NA                    |                       |                |                          | Transposon protein, putative, Mutator sub-class, expressed       |
| augustus-1-processed-gene-494.2-mRNA-1  | Indica              | NA                    |                       |                | OsR498G0204046800.01.T01 | Circumsporozoite protein-like                                    |
| augustus-1-processed-gene-7.38-mRNA-1   | Indica              | NA                    |                       | Os01g0112600   |                          |                                                                  |
| augustus-1-processed-gene-8.0-mRNA-1    | Indica              | Indica                | CC-Kinase-TM          | Os01g0113350   | OsR498G0100044500.01.T01 | Putative receptor serine/threonine kinase PR5K                   |
| augustus-1-processed-gene-8.3-mRNA-1    | Indica              | Japonica              | Kinase-TM             | Os01g0113650   | OsR498G0100044500.01.T01 | Putative receptor serine/threonine kinase PR5K                   |
| augustus-10-processed-gene-1.21-mRNA-1  | Indica              | NA                    | Kinase-TM             | Os10g0101000   | OsR498G1017996700.01.T01 | Non-specific serine/threonine protein kinase                     |

|                                          |        |          |               |              |                          |                                                                           |
|------------------------------------------|--------|----------|---------------|--------------|--------------------------|---------------------------------------------------------------------------|
| augustus-10-processed-gene-11.10-mRNA-1  | Indica | NA       |               |              |                          | Hydroxyproline-rich glycoprotein-like                                     |
| augustus-10-processed-gene-111.13-mRNA-1 | Indica | NA       |               | Os10g0442700 | OsR498G1018800100.01.T02 | Pentatricopeptide repeat-containing protein, chloroplastic                |
| augustus-10-processed-gene-12.15-mRNA-1  | Indica | NA       |               | Os10g0113000 | OsR498G1018038100.01.T01 | Deoxymugineic acid synthase 1-B                                           |
| augustus-10-processed-gene-126.13-mRNA-1 | Indica | NA       |               |              | OsR498G0407539000.01.T01 |                                                                           |
| augustus-10-processed-gene-128.0-mRNA-1  | Indica | NA       |               | Os04g0137400 | OsR498G0407530000.01.T01 |                                                                           |
| augustus-10-processed-gene-132.21-mRNA-1 | Indica | NA       |               | Os05g0471800 |                          | Far-red impaired response protein-like                                    |
| augustus-10-processed-gene-138.36-mRNA-1 | Indica | NA       | Kinase-LRR-TM |              | OsR498G0407494600.01.T01 | Putative LRR receptor-like serine/threonine-protein kinase                |
| augustus-10-processed-gene-142.24-mRNA-1 | Indica | NA       |               |              | OsR498G0815762600.01.T01 |                                                                           |
| augustus-10-processed-gene-145.25-mRNA-1 | Indica | NA       |               | Os04g0110500 | OsR498G0407447400.01.T01 | Pentatricopeptide repeat-containing protein EU1, chloroplastic            |
| augustus-10-processed-gene-145.35-mRNA-1 | Indica | NA       |               | Os04g0110100 | OsR498G0407446000.01.T01 | Legume lectins beta domain containing protein                             |
| augustus-10-processed-gene-147.14-mRNA-1 | Indica | NA       |               | Os04g0106000 | OsR498G0407429800.01.T02 | PMEI domain-containing protein (Fragment)                                 |
| augustus-10-processed-gene-147.4-mRNA-1  | Indica | NA       |               | Os04g0106500 |                          | VARLMGL domain-containing protein                                         |
| augustus-10-processed-gene-148.12-mRNA-1 | Indica | NA       |               | Os04g0103900 | OsR498G0407422800.01.T01 | Chalcone synthase G                                                       |
| augustus-10-processed-gene-159.29-mRNA-1 | Indica | NA       |               | Os10g0459600 | OsR498G1018847300.01.T01 | Xyloglucan galactosyltransferase KATAMARI1                                |
| augustus-10-processed-gene-16.14-mRNA-1  | Indica | NA       |               |              |                          | Transposase, putative, expressed                                          |
| augustus-10-processed-gene-29.3-mRNA-1   | Indica | NA       | Kinase        | Os10g0142600 | OsR498G1018125300.01.T01 | Receptor-like protein kinase FERONIA                                      |
| augustus-10-processed-gene-3.2-mRNA-1    | Indica | Indica   |               | Os01g0524500 | OsR498G1018003900.01.T01 | Transcription factor MYB51                                                |
| augustus-10-processed-gene-31.29-mRNA-1  | Indica | NA       |               |              | OsR498G1018144500.01.T01 | Cellulase                                                                 |
| augustus-10-processed-gene-31.30-mRNA-1  | Indica | NA       |               | Os10g0148000 | OsR498G1018144900.01.T01 | Protease inhibitor/seed storage/LTP family protein, expressed             |
| augustus-10-processed-gene-34.19-mRNA-1  | Indica | NA       |               | Os10g0150200 | OsR498G1018151700.01.T01 | IGR protein motif                                                         |
| augustus-10-processed-gene-37.10-mRNA-1  | Indica | NA       |               | Os10g0155300 | OsR498G1018168100.01.T01 | F-box domain containing protein, expressed                                |
| augustus-10-processed-gene-4.40-mRNA-1   | Indica | NA       |               |              | OsR498G1018011100.01.T01 | Putative Mitochondrial editing factor 22                                  |
| augustus-10-processed-gene-47.0-mRNA-1   | Indica | NA       |               | Os10g0164600 | OsR498G1018230300.01.T01 | Geraniol 8-hydroxylase-like                                               |
| augustus-10-processed-gene-47.2-mRNA-1   | Indica | NA       |               | Os10g0165000 | OsR498G1018231300.01.T01 | Core-2/l-branching beta-16-N-acetylglucosaminyltransferase family protein |
| augustus-10-processed-gene-49.26-mRNA-1  | Indica | Indica   |               | Os10g0166600 | OsR498G1018238900.01.T02 | Cytochrome P450 family protein, expressed                                 |
| augustus-10-processed-gene-49.41-mRNA-1  | Indica | NA       |               |              | OsR498G1018240900.01.T01 |                                                                           |
| augustus-10-processed-gene-50.23-mRNA-1  | Indica | NA       |               | Os10g0169200 | OsR498G1018246900.01.T01 |                                                                           |
| augustus-10-processed-gene-51.30-mRNA-1  | Indica | Indica   |               | Os12g0435200 | OsR498G1018251900.01.T01 | Nine-cis-epoxycarotenoid dioxygenase 4                                    |
| augustus-10-processed-gene-51.42-mRNA-1  | Indica | Japonica |               | Os10g0171400 | OsR498G1018303700.01.T01 |                                                                           |
| augustus-10-processed-gene-53.2-mRNA-1   | Indica | Indica   |               | Os10g0173000 | OsR498G1018256500.01.T02 |                                                                           |
| augustus-10-processed-gene-55.14-mRNA-1  | Indica | NA       |               | Os10g0176300 |                          |                                                                           |
| augustus-10-processed-gene-56.1-mRNA-1   | Indica | NA       |               |              | OsR498G1018268500.01.T01 | AAI domain-containing protein (Fragment)                                  |
| augustus-10-processed-gene-60.15-mRNA-1  | Indica | NA       |               | Os03g0732200 |                          | Dynamin GTPase                                                            |
| augustus-10-processed-gene-60.39-mRNA-1  | Indica | NA       |               |              | OsR498G0306743300.01.T01 | Hydroxyproline-rich glycoprotein-like                                     |
| augustus-10-processed-gene-61.0-mRNA-1   | Indica | NA       |               | Os10g0186200 |                          | PMEI domain-containing protein (Fragment)                                 |
| augustus-10-processed-gene-7.10-mRNA-1   | Indica | Indica   |               | Os10g0108700 | OsR498G1018024500.01.T01 | Methanol O-anthraniloyltransferase                                        |
| augustus-11-processed-gene-146.34-mRNA-1 | Indica | Japonica |               | Os11g0486000 | OsR498G0409297100.01.T04 | Truncated Sr21                                                            |
| augustus-11-processed-gene-147.1-mRNA-1  | Indica | NA       |               |              | OsR498G1120161500.01.T01 | Protease inhibitor/seed storage/LTP family protein                        |
| augustus-11-processed-gene-250.11-mRNA-1 | Indica | NA       |               | Os11g0560000 | OsR498G1018527700.01.T01 | Disease resistance protein RPM1                                           |
| augustus-11-processed-gene-252.13-mRNA-1 | Indica | NA       | CC-NBS-TM     | Os11g0684200 | OsR498G1120731300.01.T01 | NB-ARC domain containing protein, expressed                               |
| augustus-11-processed-gene-255.16-mRNA-1 | Indica | NA       |               |              | OsR498G1120738700.01.T03 |                                                                           |
| augustus-11-processed-gene-261.22-mRNA-1 | Indica | Japonica |               | Os11g0703000 | OsR498G1221905100.01.T01 | Pathogenesis-related protein 5                                            |
| augustus-11-processed-gene-261.26-mRNA-1 | Indica | NA       |               | Os11g0703600 | OsR498G1120766900.01.T02 | Protein UPSTREAM OF FLC                                                   |
| augustus-11-processed-gene-73.31-mRNA-1  | Indica | NA       |               | Os11g0211800 | OsR498G1119608900.01.T02 |                                                                           |
| augustus-12-processed-gene-114.41-mRNA-1 | Indica | NA       |               |              | OsR498G1221348100.01.T02 | Helicase and polymerase-containing protein TEBICHI                        |
| augustus-12-processed-gene-115.12-mRNA-1 | Indica | NA       |               |              |                          | Transposon protein, putative, Mutator sub-class, expressed                |
| augustus-12-processed-gene-126.23-mRNA-1 | Indica | NA       |               | Os12g0407800 | OsR498G1221372700.01.T03 | Pentatricopeptide repeat-containing protein                               |
| augustus-12-processed-gene-133.13-mRNA-1 | Indica | NA       |               |              | OsR498G1221406900.01.T01 |                                                                           |
| augustus-12-processed-gene-134.14-mRNA-1 | Indica | NA       |               |              | OsR498G1221411100.01.T01 | NAC domain-containing protein (Fragment)                                  |
| augustus-12-processed-gene-137.11-mRNA-1 | Indica | NA       |               | Os12g0422200 | OsR498G1221421300.01.T01 | DUF295 domain-containing protein                                          |
| augustus-12-processed-gene-137.12-mRNA-1 | Indica | NA       |               | Os12g0424600 | OsR498G1221421500.01.T01 | DUF295 domain-containing protein                                          |
| augustus-12-processed-gene-140.30-mRNA-1 | Indica | NA       |               | Os12g0428200 |                          | Putative chloroplast nucleoid DNA binding protein                         |
| augustus-12-processed-gene-143.10-mRNA-1 | Indica | NA       |               | Os12g0432600 | OsR498G1221448500.01.T01 | RING finger domain-containing                                             |
| augustus-12-processed-gene-209.6-mRNA-1  | Indica | NA       |               | Os12g0515500 | OsR498G1221715900.01.T02 | Zinc finger CCH domain-containing protein 67                              |
| augustus-12-processed-gene-209.8-mRNA-1  | Indica | Indica   |               | Os12g0516900 | OsR498G1221718100.01.T02 | F-box domain containing protein, expressed                                |
| augustus-12-processed-gene-210.14-mRNA-1 | Indica | NA       |               | Os12g0517000 | OsR498G1221720100.01.T01 | F-box domain-containing protein (Fragment)                                |
| augustus-12-processed-gene-210.15-mRNA-1 | Indica | NA       |               | Os12g0517100 | OsR498G1221720500.01.T01 | F-box domain containing protein, expressed                                |
| augustus-12-processed-gene-210.16-mRNA-1 | Indica | NA       |               | Os12g0517200 | OsR498G1221720900.01.T02 | Ribosomal protein S10, mitochondrial                                      |
| augustus-12-processed-gene-211.34-mRNA-1 | Indica | NA       |               |              |                          | Transposon protein, putative, Mutator sub-class, expressed                |
| augustus-12-processed-gene-212.13-mRNA-1 | Indica | Indica   |               | Os12g0529900 | OsR498G1221728500.01.T01 | Flagellar attachment zone protein 1                                       |
| augustus-12-processed-gene-215.2-mRNA-1  | Indica | NA       |               |              | OsR498G1221744300.01.T01 | Epstein-Barr virus EBNA-1-like                                            |

|                                          |        |          |               |              |                          |                                                                        |
|------------------------------------------|--------|----------|---------------|--------------|--------------------------|------------------------------------------------------------------------|
| augustus-12-processed-gene-227.14-mRNA-1 | Indica | NA       |               |              | OsR498G1221852500.01.T01 | Protein DETOXIFICATION                                                 |
| augustus-2-processed-gene-151.22-mRNA-1  | Indica | NA       |               |              | OsR498G1221513100.01.T01 | Hydroxyproline-rich glycoprotein-like                                  |
| augustus-2-processed-gene-166.21-mRNA-1  | Indica | NA       | LRR-TM        |              | OsR498G0203803900.01.T01 | NB-ARC domain-containing protein                                       |
| augustus-2-processed-gene-167.54-mRNA-1  | Indica | Japonica |               | Os02g0478900 | OsR498G0202966300.01.T03 | Protein kinase domain-containing protein                               |
| augustus-2-processed-gene-167.55-mRNA-1  | Indica | NA       |               | Os02g0478900 | OsR498G0203805900.01.T02 | Splicing factor                                                        |
| augustus-2-processed-gene-167.67-mRNA-1  | Indica | NA       |               |              | OsR498G0203809700.01.T01 | Calcineurin b-like protein 3-like                                      |
| augustus-2-processed-gene-167.68-mRNA-1  | Indica | NA       |               |              | OsR498G0203810500.01.T01 |                                                                        |
| augustus-2-processed-gene-167.81-mRNA-1  | Indica | NA       |               | Os02g0480100 |                          | ATP-dependent DNA helicase                                             |
| augustus-2-processed-gene-169.3-mRNA-1   | Indica | Japonica |               | Os02g0482400 | OsR498G0917892000.01.T01 | Diaminopimelate decarboxylase 2 chloroplastic                          |
| augustus-2-processed-gene-170.0-mRNA-1   | Indica | NA       |               | Os02g0484600 | OsR498G0203823300.01.T01 | Putative quercetin 3-O-glucoside-6''-O-malonyltransferase              |
| augustus-2-processed-gene-170.23-mRNA-1  | Indica | NA       |               | Os02g0485800 | OsR498G0203826500.01.T01 | Putative quercetin 3-O-glucoside-6''-O-malonyltransferase              |
| augustus-2-processed-gene-172.16-mRNA-1  | Indica | Indica   |               | Os02g0225200 | OsR498G0203832900.01.T01 | F-box family protein-like                                              |
| augustus-2-processed-gene-172.35-mRNA-1  | Indica | NA       |               | Os01g0967000 | OsR498G0305701300.01.T01 |                                                                        |
| augustus-2-processed-gene-181.13-mRNA-1  | Indica | Japonica |               | Os02g0503300 | OsR498G0203881700.01.T01 | X8 domain-containing protein (Fragment)                                |
| augustus-2-processed-gene-182.13-mRNA-1  | Indica | NA       |               |              | OsR498G0203883900.01.T02 | UDP-N-acetylmuramoyl-L-alanyl-D-glutamate--2, 6-diaminopimelate ligase |
| augustus-2-processed-gene-185.36-mRNA-1  | Indica | NA       |               | Os02g0510000 | OsR498G0203902900.01.T01 | J domain-containing protein (Fragment)                                 |
| augustus-2-processed-gene-185.37-mRNA-1  | Indica | Japonica |               | Os02g0510200 | OsR498G0203903500.01.T02 | Acetolactate synthase                                                  |
| augustus-2-processed-gene-185.38-mRNA-1  | Indica | NA       |               | Os02g0510600 | OsR498G0203903900.01.T01 | Farnesylated protein 3                                                 |
| augustus-2-processed-gene-187.10-mRNA-1  | Indica | Japonica |               | Os02g0511400 | OsR498G0203905300.01.T04 | Cis-2,3-dihydrobiphenyl-2,3-diol dehydrogenase                         |
| augustus-2-processed-gene-187.9-mRNA-1   | Indica | NA       |               | Os02g0511400 | OsR498G0203905300.01.T03 | 11-beta-hydroxysteroid dehydrogenase-like 6                            |
| augustus-2-processed-gene-190.44-mRNA-1  | Indica | NA       |               | Os02g0516400 | OsR498G0203926000.01.T02 | Major ampullate spidroin 2-2                                           |
| augustus-2-processed-gene-191.26-mRNA-1  | Indica | NA       |               |              | OsR498G0203930900.01.T01 |                                                                        |
| augustus-2-processed-gene-192.13-mRNA-1  | Indica | Indica   |               | Os02g0302500 | OsR498G0203943500.01.T02 | zf-RVT domain-containing protein                                       |
| augustus-2-processed-gene-192.20-mRNA-1  | Indica | NA       |               | Os02g0517700 | OsR498G0203938000.01.T01 |                                                                        |
| augustus-2-processed-gene-192.23-mRNA-1  | Indica | NA       |               | Os02g0518000 | OsR498G0203939200.01.T01 |                                                                        |
| augustus-2-processed-gene-208.21-mRNA-1  | Indica | NA       |               |              | OsR498G0612206300.01.T01 | Beta-hexosaminidase                                                    |
| augustus-2-processed-gene-223.26-mRNA-1  | Indica | NA       |               |              | OsR498G0204155200.01.T01 | RING-H2 finger protein ATL65                                           |
| augustus-2-processed-gene-234.36-mRNA-1  | Indica | NA       |               | Os02g0594300 |                          | Ethylene-responsive transcription factor LEP                           |
| augustus-2-processed-gene-24.8-mRNA-1    | Indica | NA       |               | Os02g0143400 | OsR498G0202954000.01.T01 | Auxin-induced protein 6B                                               |
| augustus-2-processed-gene-245.29-mRNA-1  | Indica | NA       |               | Os06g0272601 | OsR498G0204300200.01.T01 | dNK domain-containing protein                                          |
| augustus-2-processed-gene-247.15-mRNA-1  | Indica | Indica   | LRR-TM        | Os02g0615300 | OsR498G0204309700.01.T01 | Putative LRR receptor-like serine/threonine-protein kinase (Fragment)  |
| augustus-2-processed-gene-247.42-mRNA-1  | Indica | NA       |               |              | OsR498G0204310000.01.T01 |                                                                        |
| augustus-2-processed-gene-25.12-mRNA-1   | Indica | NA       |               |              | OsR498G0202962100.01.T01 |                                                                        |
| augustus-2-processed-gene-251.11-mRNA-1  | Indica | NA       | LRR-TM        |              | OsR498G0204320700.01.T01 | Leucine-rich repeat-like protein                                       |
| augustus-2-processed-gene-254.22-mRNA-1  | Indica | NA       |               |              | OsR498G0204330800.01.T01 |                                                                        |
| augustus-2-processed-gene-26.11-mRNA-1   | Indica | Indica   |               | Os02g0147300 | OsR498G0202966300.01.T03 | TOG domain-containing protein (Fragment)                               |
| augustus-2-processed-gene-26.25-mRNA-1   | Indica | NA       |               | Os02g0147600 | OsR498G0202967600.01.T01 |                                                                        |
| augustus-2-processed-gene-262.50-mRNA-1  | Indica | NA       |               | Os02g0633200 |                          | Membrane-associated salt-inducible protein like                        |
| augustus-2-processed-gene-267.39-mRNA-1  | Indica | NA       |               |              | OsR498G0204414300.01.T05 | Pentatricopeptide repeat-containing protein mitochondrial              |
| augustus-2-processed-gene-30.34-mRNA-1   | Indica | NA       |               | Os02g0154600 | OsR498G0202991900.01.T04 | TPT domain-containing protein                                          |
| augustus-2-processed-gene-30.39-mRNA-1   | Indica | NA       | Kinase-LRR-TM | Os02g0153100 | OsR498G0202989000.01.T01 | Putative Phytosulfokine receptor                                       |
| augustus-2-processed-gene-30.40-mRNA-1   | Indica | NA       | Kinase-LRR-TM | Os02g0153200 | OsR498G0202989400.01.T01 | Putative Phytosulfokine receptor                                       |
| augustus-2-processed-gene-30.41-mRNA-1   | Indica | NA       | Kinase-LRR-TM |              |                          | Putative leucine-rich repeat receptor-like kinase                      |
| augustus-2-processed-gene-30.42-mRNA-1   | Indica | Japonica | Kinase-LRR-TM | Os02g0153700 | OsR498G0202991600.01.T01 | Putative leucine-rich repeat receptor-like kinase                      |
| augustus-2-processed-gene-30.44-mRNA-1   | Indica | NA       | Kinase-LRR-TM | Os02g0153900 | OsR498G0202990800.01.T01 | Putative leucine-rich repeat receptor-like kinase                      |
| augustus-2-processed-gene-31.11-mRNA-1   | Indica | NA       | LRR-TM        | Os02g0155700 |                          | Tyrosine-sulfated glycopeptide receptor 1                              |
| augustus-2-processed-gene-31.8-mRNA-1    | Indica | Indica   |               | Os05g0523100 | OsR498G0202992400.01.T01 |                                                                        |
| augustus-2-processed-gene-32.19-mRNA-1   | Indica | NA       |               | Os02g0158800 | OsR498G0203005900.01.T01 | Alpha-galactosidase                                                    |
| augustus-2-processed-gene-32.4-mRNA-1    | Indica | Indica   |               | Os08g0114000 | OsR498G0203003900.01.T01 | T-complex protein 1 subunit eta                                        |
| augustus-2-processed-gene-33.34-mRNA-1   | Indica | NA       | Kinase-TM     | Os02g0161000 | OsR498G0203015000.01.T02 | Non-specific serine/threonine protein kinase                           |
| augustus-2-processed-gene-34.2-mRNA-1    | Indica | Japonica | LRR-TM        | Os02g0161700 | OsR498G0203018700.01.T01 | LRR receptor-like serine/threonine-protein kinase FLS2                 |
| augustus-2-processed-gene-37.63-mRNA-1   | Indica | NA       |               | Os02g0168500 | OsR498G0203045700.01.T03 | O-fucosyltransferase family protein (Fragment)                         |
| augustus-2-processed-gene-45.1-mRNA-1    | Indica | Indica   |               | Os02g0180200 | OsR498G0203091300.01.T03 | Nucleoid-associated protein chloroplastic                              |
| augustus-2-processed-gene-46.17-mRNA-1   | Indica | NA       |               |              | OsR498G0203101000.01.T01 | Zinc finger protein 2                                                  |
| augustus-2-processed-gene-49.25-mRNA-1   | Indica | NA       |               | Os02g0188600 |                          |                                                                        |
| augustus-2-processed-gene-49.4-mRNA-1    | Indica | Indica   |               | Os02g0187100 | OsR498G0203117500.01.T02 | cyclase-like protein 3                                                 |
| augustus-2-processed-gene-50.9-mRNA-1    | Indica | NA       |               | Os02g0189100 | OsR498G0203126600.01.T04 | Mediator of RNA polymerase II transcription subunit 11                 |
| augustus-2-processed-gene-55.14-mRNA-1   | Indica | Indica   |               | Os06g0609700 | OsR498G0203157500.01.T04 | Alpha/beta-Hydrolases superfamily protein                              |
| augustus-2-processed-gene-55.22-mRNA-1   | Indica | NA       |               |              | OsR498G0203154800.01.T01 | GRAS domain-containing protein (Fragment)                              |
| augustus-2-processed-gene-55.24-mRNA-1   | Indica | NA       |               |              | OsR498G0203156600.01.T01 | Chlorophyll a-b binding protein, chloroplastic                         |
| augustus-2-processed-gene-95.22-mRNA-1   | Indica | NA       |               |              |                          | Transposon protein, putative, CACTA, En/Spm sub-class                  |

|                                         |        |          |           |              |                          |                                                              |
|-----------------------------------------|--------|----------|-----------|--------------|--------------------------|--------------------------------------------------------------|
| augustus-2-processed-gene-98.19-mRNA-1  | Indica | Indica   |           | Os02g0270933 | OsR498G0203388600.01.T02 | Subtilisin-like protease                                     |
| augustus-3-processed-gene-324.15-mRNA-1 | Indica | NA       |           | Os10g0379100 | OsR498G1018470900.01.T01 | Tryptamine hydroxycinnamoyl transferase                      |
| augustus-3-processed-gene-328.20-mRNA-1 | Indica | NA       |           | Os08g0381000 | OsR498G0916869000.01.T01 | Cell wall protein-like                                       |
| augustus-4-processed-gene-1.21-mRNA-1   | Indica | Japonica |           | Os04g0171600 | OsR498G0407629800.01.T01 | Tyrosine N-monoxygenase                                      |
| augustus-4-processed-gene-104.14-mRNA-1 | Indica | Indica   |           | Os04g0341500 | OsR498G0408172900.01.T01 | (+)-delta-cadinene synthase isozyme A                        |
| augustus-4-processed-gene-111.34-mRNA-1 | Indica | NA       |           | Os04g0348600 | OsR498G0408222700.01.T01 | Response regulatory domain-containing protein (Fragment)     |
| augustus-4-processed-gene-112.0-mRNA-1  | Indica | Indica   |           | Os04g0351333 | OsR498G0408226900.01.T02 |                                                              |
| augustus-4-processed-gene-118.13-mRNA-1 | Indica | Indica   |           | Os04g0361500 | OsR498G0408287300.01.T01 | L-gulonolactone oxidase                                      |
| augustus-4-processed-gene-125.16-mRNA-1 | Indica | NA       |           | Os04g0370500 | OsR498G0408346500.01.T01 | F-box domain-containing protein                              |
| augustus-4-processed-gene-131.48-mRNA-1 | Indica | NA       |           |              | OsR498G0408386900.01.T01 |                                                              |
| augustus-4-processed-gene-134.17-mRNA-1 | Indica | NA       |           | Os04g0384100 |                          |                                                              |
| augustus-4-processed-gene-134.2-mRNA-1  | Indica | NA       |           | Os04g0383700 | OsR498G0408405300.01.T01 |                                                              |
| augustus-4-processed-gene-134.4-mRNA-1  | Indica | NA       |           |              | OsR498G0408405500.01.T01 |                                                              |
| augustus-4-processed-gene-135.0-mRNA-1  | Indica | NA       |           |              | OsR498G0408414500.01.T01 | Branchpoint-bridging                                         |
| augustus-4-processed-gene-135.3-mRNA-1  | Indica | Japonica |           | Os04g0386300 | OsR498G0203898100.01.T01 | Protein SHOOT GRAVITROPISM 5                                 |
| augustus-4-processed-gene-136.6-mRNA-1  | Indica | Indica   |           | Os04g0387400 | OsR498G0408424300.01.T04 | MADS-box transcription factor 6                              |
| augustus-4-processed-gene-137.2-mRNA-1  | Indica | Indica   |           | Os04g0388800 | OsR498G0408429700.01.T01 | J domain-containing protein (Fragment)                       |
| augustus-4-processed-gene-145.29-mRNA-1 | Indica | Japonica |           | Os04g0402700 | OsR498G0407604900.01.T01 |                                                              |
| augustus-4-processed-gene-148.27-mRNA-1 | Indica | Indica   |           | Os04g0407500 | OsR498G0408513300.01.T01 |                                                              |
| augustus-4-processed-gene-148.28-mRNA-1 | Indica | NA       |           | Os04g0407800 |                          | Gibberellin 2-beta-dioxygenase 8                             |
| augustus-4-processed-gene-148.59-mRNA-1 | Indica | NA       |           | Os04g0409500 | OsR498G0408518400.01.T04 | Metallophos domain-containing protein                        |
| augustus-4-processed-gene-149.46-mRNA-1 | Indica | NA       |           | Os04g0411200 | OsR498G0408521900.01.T01 | Protein LITTLE ZIPPER 4 isoform A                            |
| augustus-4-processed-gene-149.49-mRNA-1 | Indica | NA       |           | Os04g0411800 | OsR498G0408524100.01.T01 | AB hydrolase-1 domain-containing protein                     |
| augustus-4-processed-gene-149.70-mRNA-1 | Indica | NA       |           | Os04g0411400 | OsR498G0408522400.01.T01 | Centroradialis                                               |
| augustus-4-processed-gene-150.1-mRNA-1  | Indica | NA       |           | Os04g0412100 | OsR498G0408525300.01.T01 | Ferredoxin (Fragment)                                        |
| augustus-4-processed-gene-151.11-mRNA-1 | Indica | NA       |           | Os04g0414800 | OsR498G0408537500.01.T03 | Pentatricopeptide repeat-containing protein, mitochondrial   |
| augustus-4-processed-gene-154.22-mRNA-1 | Indica | NA       | Kinase-TM | Os04g0420600 | OsR498G0408563300.01.T01 | Non-specific serine/threonine protein kinase (Fragment)      |
| augustus-4-processed-gene-159.17-mRNA-1 | Indica | NA       |           | Os04g0429800 | OsR498G0408584900.01.T04 | Nicotinate phosphoribosyltransferase                         |
| augustus-4-processed-gene-201.1-mRNA-1  | Indica | NA       |           | Os04g0508600 | OsR498G0408868100.01.T01 | Putative lung seven transmembrane receptor 1                 |
| augustus-4-processed-gene-201.2-mRNA-1  | Indica | NA       |           |              | OsR498G0408868500.01.T01 |                                                              |
| augustus-4-processed-gene-244.32-mRNA-1 | Indica | NA       |           |              |                          | Poly(A) polymerase                                           |
| augustus-4-processed-gene-254.28-mRNA-1 | Indica | Indica   |           | Os08g0224700 | OsR498G0409250600.01.T01 | 26S proteasome non-ATPase regulatory subunit 1 homolog       |
| augustus-4-processed-gene-284.34-mRNA-1 | Indica | NA       |           | Os04g0663100 | OsR498G0409437500.01.T05 | Orphans transcription factor                                 |
| augustus-4-processed-gene-285.29-mRNA-1 | Indica | Indica   |           | Os04g0664500 | OsR498G0409443100.01.T01 | Agmatine hydroxycinnamoyltransferase 1                       |
| augustus-4-processed-gene-34.22-mRNA-1  | Indica | NA       |           | Os04g0225700 | OsR498G0407767500.01.T01 | BURP domain-containing protein 5                             |
| augustus-4-processed-gene-37.12-mRNA-1  | Indica | NA       |           |              | OsR498G0510283100.01.T01 | Splicing coactivator subunit-like                            |
| augustus-4-processed-gene-86.16-mRNA-1  | Indica | NA       |           |              | OsR498G0408109200.01.T01 | SRF-type transcription factor family protein                 |
| augustus-5-processed-gene-141.59-mRNA-1 | Indica | NA       |           | Os05g0305700 | OsR498G0510414000.01.T01 | Homeobox protein SIX3-like isoform X2                        |
| augustus-5-processed-gene-155.44-mRNA-1 | Indica | NA       |           | Os03g0110200 | OsR498G0101158000.01.T01 | Transposon protein, putative, Mutator sub-class, expressed   |
| augustus-5-processed-gene-160.34-mRNA-1 | Indica | NA       |           | Os12g0468900 | OsR498G0713957300.01.T01 | Cell wall protein-like                                       |
| augustus-5-processed-gene-161.11-mRNA-1 | Indica | NA       |           |              | OsR498G0510526300.01.T01 |                                                              |
| augustus-5-processed-gene-161.19-mRNA-1 | Indica | NA       |           | Os05g0332000 | OsR498G0510526000.01.T01 | Putative prolamin 7                                          |
| augustus-5-processed-gene-161.27-mRNA-1 | Indica | Indica   |           | Os05g0332600 | OsR498G0510530600.01.T01 | Adenine/guanine permease AZG1                                |
| augustus-5-processed-gene-161.5-mRNA-1  | Indica | NA       |           | Os05g0332000 | OsR498G0510526000.01.T01 | Putative prolamin 7                                          |
| augustus-5-processed-gene-162.23-mRNA-1 | Indica | Japonica |           | Os05g0333000 | OsR498G1019239600.01.T06 | 60S ribosomal export protein NMD3                            |
| augustus-5-processed-gene-164.6-mRNA-1  | Indica | Indica   |           | Os05g0335800 | OsR498G0510544200.01.T01 | Peptide transporter PTR3-A                                   |
| augustus-5-processed-gene-173.12-mRNA-1 | Indica | NA       |           |              | OsR498G0510603400.01.T01 |                                                              |
| augustus-5-processed-gene-173.13-mRNA-1 | Indica | Japonica |           | Os05g0350900 | OsR498G0510603600.01.T01 | Tuber-specific and sucrose-responsive element binding factor |
| augustus-5-processed-gene-181.27-mRNA-1 | Indica | NA       |           |              | OsR498G0510664200.01.T02 |                                                              |
| augustus-5-processed-gene-181.28-mRNA-1 | Indica | NA       |           | Os05g0363600 | OsR498G0510666200.01.T01 | Catalytic/ oxidoreductase, acting on NADH or NADPH           |
| augustus-5-processed-gene-183.31-mRNA-1 | Indica | NA       |           |              |                          |                                                              |
| augustus-5-processed-gene-183.53-mRNA-1 | Indica | NA       |           | Os12g0635700 | OsR498G1222170400.01.T01 | Elongation of fatty acids protein 3-like                     |
| augustus-5-processed-gene-187.11-mRNA-1 | Indica | NA       |           | Os05g0370000 | OsR498G0510689400.01.T01 | Pentatricopeptide repeat                                     |
| augustus-5-processed-gene-187.34-mRNA-1 | Indica | Japonica |           | Os05g0370300 | OsR498G0714930700.01.T01 | C2 domain-containing protein (Fragment)                      |
| augustus-5-processed-gene-190.25-mRNA-1 | Indica | NA       |           |              | OsR498G0510708400.01.T01 | ABC-type lipoprotein export system, ATPase component         |
| augustus-5-processed-gene-190.32-mRNA-1 | Indica | NA       |           | Os05g0375400 | OsR498G0510710800.01.T02 | Putative O-Glycosyl hydrolase superfamily protein            |
| augustus-5-processed-gene-212.28-mRNA-1 | Indica | NA       |           | Os05g0412300 |                          |                                                              |
| augustus-5-processed-gene-223.35-mRNA-1 | Indica | NA       |           | Os05g0433000 |                          | Serine/threonine-protein kinase SAPK8                        |
| augustus-5-processed-gene-25.28-mRNA-1  | Indica | NA       |           | Os05g0145100 | OsR498G0509725400.01.T01 |                                                              |
| augustus-5-processed-gene-281.27-mRNA-1 | Indica | NA       |           |              | OsR498G0815745200.01.T01 | SWIM-type domain-containing protein                          |
| augustus-5-processed-gene-282.38-mRNA-1 | Indica | NA       |           |              | OsR498G0917328500.01.T01 | Ribonuclease H                                               |

|                                         |        |          |           |              |                          |                                                                  |
|-----------------------------------------|--------|----------|-----------|--------------|--------------------------|------------------------------------------------------------------|
| augustus-5-processed-gene-286.59-mRNA-1 | Indica | NA       |           | Os05g0554100 | OsR498G0511312600.01.T01 | Ribosomal protein L7/L12 oligomerization                         |
| augustus-5-processed-gene-287.4-mRNA-1  | Indica | Indica   |           | Os01g0681900 | OsR498G0511318100.01.T02 | NADH-dependent glutamate synthase                                |
| augustus-5-processed-gene-288.20-mRNA-1 | Indica | NA       |           | Os05g0558000 | OsR498G0511325800.01.T01 | Ribosomal L1 domain-containing protein 1                         |
| augustus-5-processed-gene-288.25-mRNA-1 | Indica | Indica   |           | Os10g0549850 | OsR498G0511327600.01.T01 |                                                                  |
| augustus-5-processed-gene-292.53-mRNA-1 | Indica | NA       |           |              | OsR498G0511350600.01.T01 | Ethylene-responsive transcription factor                         |
| augustus-5-processed-gene-292.54-mRNA-1 | Indica | NA       |           | Os05g0565500 | OsR498G0511352200.01.T01 | Putative 3-hydroxyisobutyrate dehydrogenase-like 3 mitochondrial |
| augustus-5-processed-gene-293.32-mRNA-1 | Indica | NA       |           | Os05g0567500 | OsR498G0511359200.01.T06 | ENDO3c domain-containing protein (Fragment)                      |
| augustus-5-processed-gene-293.4-mRNA-1  | Indica | NA       | Kinase-TM | Os05g0566400 | OsR498G0511355000.01.T05 | Mitogen-activated protein kinase                                 |
| augustus-5-processed-gene-293.5-mRNA-1  | Indica | NA       |           | Os05g0566500 | OsR498G0511356000.01.T01 | Eukaryotic translation initiation factor 3 subunit D             |
| augustus-5-processed-gene-294.30-mRNA-1 | Indica | NA       |           | Os05g0568300 | OsR498G0511363600.01.T01 | Large subunit ribosomal protein L7/L12                           |
| augustus-5-processed-gene-294.34-mRNA-1 | Indica | NA       |           |              | OsR498G0511368000.01.T01 | CTP synthase (glutamine hydrolyzing)                             |
| augustus-5-processed-gene-295.46-mRNA-1 | Indica | NA       |           | Os05g0570300 | OsR498G0511370200.01.T01 | DUF295 domain-containing protein                                 |
| augustus-5-processed-gene-296.27-mRNA-1 | Indica | NA       |           | Os05g0572900 | OsR498G0511376600.01.T01 | Pentatricopeptide repeat                                         |
| augustus-5-processed-gene-298.25-mRNA-1 | Indica | NA       |           | Os05g0577500 | OsR498G0511394400.01.T01 | Probable calcium-binding protein CML14                           |
| augustus-5-processed-gene-298.4-mRNA-1  | Indica | NA       |           |              | OsR498G0511390200.01.T01 | Non-specific serine/threonine protein kinase                     |
| augustus-5-processed-gene-298.6-mRNA-1  | Indica | NA       |           | Os05g0576600 | OsR498G0511391600.01.T01 | J domain-containing protein                                      |
| augustus-5-processed-gene-307.45-mRNA-1 | Indica | NA       |           | Os05g0594200 | OsR498G0511449400.01.T01 | Vacuolar cation/proton exchanger                                 |
| augustus-5-processed-gene-46.28-mRNA-1  | Indica | NA       |           | Os05g0178400 | OsR498G0509853800.01.T01 | Serine/threonine protein phosphatase 2A regulatory subunit       |
| augustus-5-processed-gene-56.19-mRNA-1  | Indica | Indica   |           | Os05g0192100 | OsR498G0509914200.01.T01 | Stem 28 kDa glycoprotein                                         |
| augustus-5-processed-gene-66.22-mRNA-1  | Indica | Japonica | Kinase-TM | Os05g0208100 | OsR498G0816176500.01.T01 | Non-specific serine/threonine protein kinase                     |
| augustus-5-processed-gene-67.3-mRNA-1   | Indica | Indica   |           | Os01g0209700 | OsR498G0509994400.01.T02 | Gibberellin 2-beta-dioxygenase                                   |
| augustus-5-processed-gene-71.21-mRNA-1  | Indica | NA       |           | Os05g0215700 |                          |                                                                  |
| augustus-5-processed-gene-74.24-mRNA-1  | Indica | NA       |           |              | OsR498G0510045400.01.T01 |                                                                  |
| augustus-5-processed-gene-75.27-mRNA-1  | Indica | NA       |           | Os05g0223000 | OsR498G0510053600.01.T01 | Probable calcium-binding protein CML18                           |
| augustus-5-processed-gene-75.5-mRNA-1   | Indica | Indica   |           | Os05g0217800 | OsR498G0510051200.01.T01 | BURP domain-containing protein 8                                 |
| augustus-6-processed-gene-299.7-mRNA-1  | Indica | NA       |           | Os06g0704400 |                          | Transposon protein, putative, mutator sub-class                  |
| augustus-6-processed-gene-309.53-mRNA-1 | Indica | NA       |           |              | OsR498G0511427100.01.T01 | Epstein-Barr virus EBNA-1-like                                   |
| augustus-6-processed-gene-44.67-mRNA-1  | Indica | NA       |           | Os06g0186400 | OsR498G0611742200.01.T02 | Carboxypeptidase                                                 |
| augustus-7-processed-gene-1.0-mRNA-1    | Indica | NA       |           | Os07g0101200 | OsR498G0713357100.01.T04 | BHLH domain-containing protein (Fragment)                        |
| augustus-7-processed-gene-10.16-mRNA-1  | Indica | NA       |           | Os07g0127500 | OsR498G0713445900.01.T01 | pathogenesis-related protein PR-1                                |
| augustus-7-processed-gene-10.20-mRNA-1  | Indica | Indica   |           | Os01g0382400 | OsR498G0713447700.01.T01 | SCP domain-containing protein                                    |
| augustus-7-processed-gene-10.4-mRNA-1   | Indica | NA       |           |              | OsR498G1220887700.01.T01 | Hydroxyproline-rich glycoprotein-like                            |
| augustus-7-processed-gene-11.6-mRNA-1   | Indica | Indica   |           | Os07g0129200 | OsR498G0713449300.01.T01 | Pathogenesis-related protein class I (Fragment)                  |
| augustus-7-processed-gene-12.18-mRNA-1  | Indica | NA       | Kinase-TM | Os07g0130100 | OsR498G0713460400.01.T01 | L-type lectin-domain containing receptor kinase IV.2             |
| augustus-7-processed-gene-12.19-mRNA-1  | Indica | NA       | Kinase-TM | Os07g0130200 | OsR498G0713461200.01.T01 | Putative receptor kinase Lecrk                                   |
| augustus-7-processed-gene-12.20-mRNA-1  | Indica | Japonica | Kinase-TM | Os07g0130300 | OsR498G0713999000.01.T01 | L-type lectin-domain containing receptor kinase IV.1             |
| augustus-7-processed-gene-12.25-mRNA-1  | Indica | NA       | Kinase-TM | Os07g0130800 | OsR498G0713462000.01.T01 | Putative receptor kinase Lecrk                                   |
| augustus-7-processed-gene-12.31-mRNA-1  | Indica | NA       | Kinase-TM | Os07g0132150 | OsR498G0713464000.01.T01 | L-type lectin-domain containing receptor kinase IV.2             |
| augustus-7-processed-gene-13.14-mRNA-1  | Indica | NA       | Kinase-TM |              | OsR498G0713464300.01.T06 | Putative receptor-type protein kinase LRK1                       |
| augustus-7-processed-gene-13.27-mRNA-1  | Indica | Indica   | Kinase-TM | Os07g0130200 | OsR498G0713465300.01.T01 | Putative receptor-type protein kinase LRK1                       |
| augustus-7-processed-gene-13.37-mRNA-1  | Indica | Indica   | Kinase-TM | Os07g0133100 | OsR498G0713465800.01.T01 | Non-specific serine/threonine protein kinase                     |
| augustus-7-processed-gene-158.9-mRNA-1  | Indica | Japonica |           | Os07g0460100 | OsR498G0509914200.01.T01 | Stem 28 kDa glycoprotein                                         |
| augustus-7-processed-gene-181.23-mRNA-1 | Indica | NA       | Kinase-TM | Os07g0493800 | OsR498G0714347500.01.T01 | Wall-associated protein kinase                                   |
| augustus-7-processed-gene-182.53-mRNA-1 | Indica | NA       |           | Os07g0496300 |                          | protein FAR-RED IMPAIRED RESPONSE 1-like                         |
| augustus-7-processed-gene-184.26-mRNA-1 | Indica | Indica   |           | Os02g0452800 | OsR498G0714367900.01.T01 | DUF295 domain-containing protein                                 |
| augustus-7-processed-gene-184.42-mRNA-1 | Indica | NA       |           | Os07g0499900 |                          | DUF295 domain-containing protein                                 |
| augustus-7-processed-gene-184.5-mRNA-1  | Indica | NA       |           |              |                          |                                                                  |
| augustus-7-processed-gene-193.58-mRNA-1 | Indica | Japonica |           | Os07g0514801 | OsR498G0306608800.01.T06 |                                                                  |
| augustus-7-processed-gene-198.23-mRNA-1 | Indica | NA       | CC-NBS-TM | Os07g0521800 | OsR498G0714451300.01.T01 | Putative resistance complex protein I2C-2                        |
| augustus-7-processed-gene-200.18-mRNA-1 | Indica | NA       |           | Os07g0526600 | OsR498G0714472500.01.T01 | Putative carboxylesterase 2                                      |
| augustus-7-processed-gene-201.21-mRNA-1 | Indica | NA       |           |              | OsR498G0714474500.01.T01 |                                                                  |
| augustus-7-processed-gene-204.10-mRNA-1 | Indica | NA       |           |              | OsR498G0204046800.01.T01 | Epstein-Barr virus EBNA-1-like                                   |
| augustus-7-processed-gene-205.42-mRNA-1 | Indica | NA       |           | Os07g0533800 | OsR498G0714494400.01.T01 | Putative nucleoid DNA-binding protein cnd41                      |
| augustus-7-processed-gene-206.31-mRNA-1 | Indica | NA       |           |              | OsR498G0714501300.01.T02 | Gnk2-homologous domain-containing protein (Fragment)             |
| augustus-7-processed-gene-208.7-mRNA-1  | Indica | NA       | Kinase-TM |              |                          | Receptor-like serine/threonine-protein kinase                    |
| augustus-7-processed-gene-216.24-mRNA-1 | Indica | NA       |           |              | OsR498G0714552500.01.T01 | F-box domain-containing protein                                  |
| augustus-7-processed-gene-216.35-mRNA-1 | Indica | Japonica |           | Os07g0554200 | OsR498G0714554100.01.T01 | F-box domain-containing protein                                  |
| augustus-7-processed-gene-216.36-mRNA-1 | Indica | NA       |           |              |                          | NAM-associated domain-containing protein                         |
| augustus-7-processed-gene-231.4-mRNA-1  | Indica | NA       |           | Os07g0577300 | OsR498G0714622900.01.T06 | Glucan endo-1,3-beta-D-glucosidase                               |
| augustus-7-processed-gene-232.24-mRNA-1 | Indica | NA       |           | Os10g0460000 | OsR498G0204348500.01.T01 |                                                                  |
| augustus-7-processed-gene-241.42-mRNA-1 | Indica | Indica   |           | Os12g0230600 | OsR498G0714697900.01.T01 |                                                                  |

|                                                |        |          |               |              |                          |                                                                   |
|------------------------------------------------|--------|----------|---------------|--------------|--------------------------|-------------------------------------------------------------------|
| augustus-7-processed-gene-34.14-mRNA-1         | Indica | NA       |               | Os07g0172600 | OsR498G0713602400.01.T01 | Pentatricopeptide repeat-containing protein103                    |
| augustus-7-processed-gene-35.1-mRNA-1          | Indica | Indica   |               | Os07g0174700 | OsR498G0713607100.01.T02 | Constitutive photomorphogenesis protein 10                        |
| augustus-7-processed-gene-5.16-mRNA-1          | Indica | NA       |               |              | OsR498G0713409700.01.T01 | DUF4220 domain-containing protein (Fragment)                      |
| augustus-8-processed-gene-102.30-mRNA-1        | Indica | NA       |               |              | OsR498G0306743300.01.T01 | Transposon protein, putative, CACTA, En/Spm sub-class             |
| augustus-8-processed-gene-103.47-mRNA-1        | Indica | NA       | LRR-TM        | Os08g0266400 |                          | Putative somatic embryogenesis protein kinase 1                   |
| augustus-8-processed-gene-104.16-mRNA-1        | Indica | NA       |               | Os08g0267000 | OsR498G0815588200.01.T01 | FBD domain-containing protein                                     |
| augustus-8-processed-gene-122.25-mRNA-1        | Indica | NA       |               |              |                          |                                                                   |
| augustus-8-processed-gene-131.7-mRNA-1         | Indica | NA       |               | Os08g0297500 |                          |                                                                   |
| augustus-8-processed-gene-156.20-mRNA-1        | Indica | NA       |               |              | OsR498G0102174700.01.T01 | Transposon protein, putative, unclassified                        |
| augustus-8-processed-gene-164.30-mRNA-1        | Indica | NA       |               |              |                          |                                                                   |
| augustus-8-processed-gene-165.22-mRNA-1        | Indica | NA       |               | Os08g0351300 |                          |                                                                   |
| augustus-8-processed-gene-165.3-mRNA-1         | Indica | NA       |               |              | OsR498G0815866000.01.T01 |                                                                   |
| augustus-8-processed-gene-178.22-mRNA-1        | Indica | NA       |               |              | OsR498G0713579700.01.T01 | Hydroxyproline-rich glycoprotein-like                             |
| augustus-8-processed-gene-189.5-mRNA-1         | Indica | NA       | NBS-TM        | Os08g0373400 |                          | CC-NBS-LRR type disease resistance protein NLR1-V                 |
| augustus-8-processed-gene-190.23-mRNA-1        | Indica | NA       |               |              | OsR498G0815948900.01.T01 | Transposon protein, putative, CACTA, En/Spm sub-class             |
| augustus-8-processed-gene-192.14-mRNA-1        | Indica | NA       |               | Os08g0378800 | OsR498G0815961000.01.T01 | SAM domain-containing protein (Fragment)                          |
| augustus-8-processed-gene-192.16-mRNA-1        | Indica | NA       |               | Os08g0379000 | OsR498G0815961400.01.T05 | Nuclear factor of activated T-cells 5 isoform X2                  |
| augustus-8-processed-gene-194.33-mRNA-1        | Indica | NA       |               |              |                          | Transposon protein, putative, Mutator sub-class, expressed        |
| augustus-8-processed-gene-215.20-mRNA-1        | Indica | NA       |               | Os08g0421850 | OsR498G0816100800.01.T01 | RING-type E3 ubiquitin transferase                                |
| augustus-8-processed-gene-221.59-mRNA-1        | Indica | NA       |               | Os04g0184800 |                          | Transposon protein, putative, Mutator sub-class                   |
| augustus-8-processed-gene-223.31-mRNA-1        | Indica | Indica   |               | Os08g0434300 | OsR498G0816151600.01.T02 | Malate dehydrogenase                                              |
| augustus-8-processed-gene-231.5-mRNA-1         | Indica | NA       | Kinase-LRR-TM | Os08g0446200 | OsR498G0816198200.01.T01 | Leucine-rich repeat receptor-like protein kinase PEPR1            |
| augustus-8-processed-gene-276.62-mRNA-1        | Indica | NA       |               | Os07g0513300 | OsR498G0102262600.01.T01 | Transposable element protein, putative, MuDR, expressed           |
| augustus-8-processed-gene-32.23-mRNA-1         | Indica | NA       |               | Os08g0152600 | OsR498G0815203800.01.T01 | Protein enhanced disease resistance 2                             |
| augustus-8-processed-gene-33.7-mRNA-1          | Indica | Indica   |               | Os08g0153600 | OsR498G0815207400.01.T04 | Pentatricopeptide repeat-containing protein mitochondrial         |
| augustus-8-processed-gene-33.8-mRNA-1          | Indica | NA       |               | Os08g0153800 | OsR498G0815207800.01.T01 | TRP-like ion channel pkd2                                         |
| augustus-8-processed-gene-36.22-mRNA-1         | Indica | NA       |               | Os08g0158200 | OsR498G0815235000.01.T01 | Reticuline oxidase                                                |
| augustus-8-processed-gene-41.17-mRNA-1         | Indica | NA       |               |              | OsR498G0204368800.01.T01 | N-acetylmuramoyl-L-alanine amidase                                |
| augustus-8-processed-gene-62.12-mRNA-1         | Indica | NA       |               | Os08g0203900 | OsR498G0815388600.01.T01 | GDP-mannose transporter GONST4                                    |
| augustus-9-processed-gene-100.5-mRNA-1         | Indica | NA       |               |              | OsR498G0917167800.01.T01 |                                                                   |
| augustus-9-processed-gene-103.24-mRNA-1        | Indica | Japonica |               | Os09g0333600 | OsR498G0917178000.01.T05 | Pleiotropic drug resistance protein 4                             |
| augustus-9-processed-gene-132.23-mRNA-1        | Indica | NA       |               | Os09g0384900 | OsR498G0917335000.01.T01 | DUF295 domain-containing protein (Fragment)                       |
| augustus-9-processed-gene-133.2-mRNA-1         | Indica | NA       |               |              |                          | Zinc finger transcription factor                                  |
| augustus-9-processed-gene-139.32-mRNA-1        | Indica | NA       |               | Os09g0395400 |                          |                                                                   |
| augustus-9-processed-gene-141.32-mRNA-1        | Indica | NA       | Kinase-LRR-TM | Os09g0400500 | OsR498G0917406000.01.T01 | Atypical receptor-like kinase MARK                                |
| augustus-9-processed-gene-144.32-mRNA-1        | Indica | NA       |               | Os09g0407800 | OsR498G0917422800.01.T01 | Pentatricopeptide repeat-containing protein chloroplastic         |
| augustus-9-processed-gene-70.14-mRNA-1         | Indica | NA       |               |              |                          | Transposon protein, putative, Mutator sub-class, expressed        |
| augustus-9-processed-gene-71.15-mRNA-1         | Indica | NA       |               |              | OsR498G1018968000.01.T01 | ATP-dependent DNA helicase                                        |
| augustus-9-processed-gene-72.22-mRNA-1         | Indica | NA       |               |              | OsR498G0204768400.01.T01 | Epstein-Barr virus EBNA-1-like                                    |
| augustus_masked-1-processed-gene-16.17-mRNA-1  | Indica | NA       |               | Os01g0130900 | OsR498G0100106000.01.T01 | Mediator of RNA polymerase II transcription subunit 25 (Fragment) |
| augustus_masked-1-processed-gene-17.43-mRNA-1  | Indica | NA       |               | Os01g0132200 | OsR498G0100112800.01.T01 | Translation initiation factor IF-2-like                           |
| augustus_masked-1-processed-gene-17.46-mRNA-1  | Indica | NA       |               | Os01g0132766 |                          | Yin/yang transcription factor                                     |
| augustus_masked-1-processed-gene-19.51-mRNA-1  | Indica | NA       |               | Os01g0136300 | OsR498G0100124800.01.T01 |                                                                   |
| augustus_masked-1-processed-gene-19.53-mRNA-1  | Indica | NA       |               |              | OsR498G0100125400.01.T01 | Protein kinase domain-containing protein                          |
| augustus_masked-1-processed-gene-19.55-mRNA-1  | Indica | NA       |               |              |                          | Protein kinase domain-containing protein                          |
| augustus_masked-1-processed-gene-20.51-mRNA-1  | Indica | NA       |               |              |                          | DDE Tnp4 domain-containing protein (Fragment)                     |
| augustus_masked-1-processed-gene-21.41-mRNA-1  | Indica | NA       |               |              | OsR498G0100133400.01.T01 |                                                                   |
| augustus_masked-1-processed-gene-26.22-mRNA-1  | Indica | NA       |               | Os01g0148500 | OsR498G0100175200.01.T01 |                                                                   |
| augustus_masked-1-processed-gene-29.44-mRNA-1  | Indica | Japonica |               | Os01g0154900 | OsR498G0100193100.01.T01 | Putative carboxylesterase 15                                      |
| augustus_masked-1-processed-gene-29.45-mRNA-1  | Indica | NA       |               | Os01g0155000 | OsR498G0100195800.01.T01 | Putative carboxylesterase 15                                      |
| augustus_masked-1-processed-gene-30.82-mRNA-1  | Indica | NA       |               |              | OsR498G0100202400.01.T01 |                                                                   |
| augustus_masked-1-processed-gene-30.85-mRNA-1  | Indica | NA       |               | Os01g0158100 | OsR498G0100204400.01.T01 | protein THYLAKOID ASSEMBLY 8, chloroplastic-like                  |
| augustus_masked-1-processed-gene-31.28-mRNA-1  | Indica | Indica   |               | Os01g0159200 | OsR498G0100209000.01.T03 | FAS1 domain-containing protein (Fragment)                         |
| augustus_masked-1-processed-gene-35.34-mRNA-1  | Indica | NA       |               | Os01g0168100 | OsR498G0100225000.01.T04 | NAB domain-containing protein (Fragment)                          |
| augustus_masked-1-processed-gene-35.53-mRNA-1  | Indica | NA       |               | Os01g0169400 | OsR498G0100232000.01.T02 | Ramosa 2                                                          |
| augustus_masked-1-processed-gene-350.13-mRNA-1 | Indica | NA       |               |              | OsR498G0102184300.01.T01 | Anaphase-promoting complex subunit 5                              |
| augustus_masked-1-processed-gene-353.62-mRNA-1 | Indica | NA       |               |              |                          | 60S ribosomal protein L30                                         |
| augustus_masked-1-processed-gene-353.78-mRNA-1 | Indica | NA       |               | Os01g0812900 | OsR498G0102199000.01.T01 | Protein RETICULATA-RELATED 3 chloroplastic                        |
| augustus_masked-1-processed-gene-354.66-mRNA-1 | Indica | NA       |               | Os01g0815900 | OsR498G0102207400.01.T02 | Pentatricopeptide repeat-containing protein mitochondrial         |
| augustus_masked-1-processed-gene-356.51-mRNA-1 | Indica | NA       |               |              | OsR498G0102215800.01.T02 | Pentatricopeptide repeat-containing protein                       |
| augustus_masked-1-processed-gene-359.33-mRNA-1 | Indica | NA       |               | Os01g0823700 | OsR498G0102239000.01.T04 | DUF641 domain-containing protein                                  |

|                                                 |        |          |            |              |                           |                                                                  |
|-------------------------------------------------|--------|----------|------------|--------------|---------------------------|------------------------------------------------------------------|
| augustus_masked-1-processed-gene-359.34-mRNA-1  | Indica | NA       |            | Os01g0823900 | OsR498G0102239800.01.T01  | RING-type E3 ubiquitin transferase                               |
| augustus_masked-1-processed-gene-359.9-mRNA-1   | Indica | NA       |            | Os01g0822900 | OsR498G0102234200.01.T02  | Non-specific lipid-transfer protein (Fragment)                   |
| augustus_masked-1-processed-gene-362.22-mRNA-1  | Indica | NA       |            | Os01g0829600 |                           |                                                                  |
| augustus_masked-1-processed-gene-362.25-mRNA-1  | Indica | NA       |            | Os01g0830200 | OsR498G0102261800.01.T03  | E3 ubiquitin-protein ligase RNF5                                 |
| augustus_masked-1-processed-gene-362.28-mRNA-1  | Indica | NA       |            |              | OsR498G0102265800.01.T01  | Ring finger protein 13 (Fragment)                                |
| augustus_masked-1-processed-gene-365.30-mRNA-1  | Indica | NA       |            |              | OsR498G0102280600.01.T01  |                                                                  |
| augustus_masked-1-processed-gene-366.27-mRNA-1  | Indica | NA       |            | Os01g0836800 | OsR498G0102289000.01.T01  | Lung seven transmembrane receptor family protein                 |
| augustus_masked-1-processed-gene-366.31-mRNA-1  | Indica | NA       |            | Os01g0837800 | OsR498G0102292400.01.T02  | Metal tolerance protein 5                                        |
| augustus_masked-1-processed-gene-366.5-mRNA-1   | Indica | NA       |            |              | OsR498G0102287000.01.T01  |                                                                  |
| augustus_masked-1-processed-gene-367.40-mRNA-1  | Indica | NA       |            | Os01g0838200 | OsR498G0102294600.01.T01  | Protein kinase domain-containing protein                         |
| augustus_masked-1-processed-gene-367.41-mRNA-1  | Indica | NA       |            | Os01g0838600 | OsR498G0102296000.01.T01  | Zinc finger transcription factor ZFP19                           |
| augustus_masked-1-processed-gene-367.56-mRNA-1  | Indica | NA       |            | Os07g0433200 | OsR498G0510328900.01.T01  | Retrotransposon protein, putative, Ty1-copia subclass            |
| augustus_masked-1-processed-gene-367.57-mRNA-1  | Indica | NA       |            |              | OsR498G0510328900.01.T01  |                                                                  |
| augustus_masked-1-processed-gene-367.60-mRNA-1  | Indica | Japonica |            | Os01g0839500 | OsR498G0305687300.01.T01  |                                                                  |
| augustus_masked-1-processed-gene-368.24-mRNA-1  | Indica | NA       |            | Os01g0840200 | OsR498G0102302600.01.T01  | Putative translation initiation factor IF-2                      |
| augustus_masked-1-processed-gene-470.25-mRNA-1  | Indica | NA       |            | Os01g0905800 | OsR498G0102538200.01.T01  | Fructose-bisphosphate aldolase                                   |
| augustus_masked-1-processed-gene-470.30-mRNA-1  | Indica | NA       |            | Os01g0906425 | OsR498G0102541200.01.T01  |                                                                  |
| augustus_masked-1-processed-gene-472.64-mRNA-1  | Indica | NA       |            | Os01g0909400 | OsR498G0102552000.01.T01  | DUF868 domain-containing protein                                 |
| augustus_masked-1-processed-gene-473.25-mRNA-1  | Indica | NA       |            |              |                           | Transcription factor BTF3                                        |
| augustus_masked-1-processed-gene-474.24-mRNA-1  | Indica | NA       |            |              | OsR498G0102558800.01.T01  |                                                                  |
| augustus_masked-1-processed-gene-491.62-mRNA-1  | Indica | NA       |            | Os01g0941200 | OsR498G0102675100.01.T01  | Glucan endo-1,3-beta-glucosidase isoenzyme I                     |
| augustus_masked-1-processed-gene-7.51-mRNA-1    | Indica | NA       |            | Os01g0112100 | OsR498G0100039200.01.T02  |                                                                  |
| augustus_masked-1-processed-gene-7.53-mRNA-1    | Indica | NA       |            | Os01g0112400 | OsR498G0100040400.01.T02  | probable aquaporin NIP-type                                      |
| augustus_masked-1-processed-gene-8.12-mRNA-1    | Indica | NA       | Kinase-TM  | Os01g0113400 | OsR498G0100045000.01.T04  | Cysteine-rich receptor-like protein kinase 37                    |
| augustus_masked-1-processed-gene-81.28-mRNA-1   | Indica | NA       |            | Os01g0246100 | OsR498G0100539200.01.T05  | Histone acetyltransferase                                        |
| augustus_masked-1-processed-gene-9.31-mRNA-1    | Indica | Indica   | Kinase-TM  | Os01g0117400 | OsR498G0100056000.01.T03  | Receptor-like kinase                                             |
| augustus_masked-1-processed-gene-9.4-mRNA-1     | Indica | NA       | Kinase-TM  | Os01g0115700 | OsR498G0100051200.01.T01  | Receptor-like kinase                                             |
| augustus_masked-10-processed-gene-1.26-mRNA-1   | Indica | Japonica |            | Os10g0100700 | OsR498G0713353000.01.T01  | Pyridoxal 5'-phosphate synthase subunit PDX1                     |
| augustus_masked-10-processed-gene-112.18-mRNA-1 | Indica | NA       |            | Os10g0444700 | OsR498G1018804000.01.T01  | H(+)/Pi cotransporter                                            |
| augustus_masked-10-processed-gene-122.15-mRNA-1 | Indica | NA       |            | Os04g0156200 | OsR498G04047574100.01.T01 |                                                                  |
| augustus_masked-10-processed-gene-122.33-mRNA-1 | Indica | NA       |            |              | OsR498G0407569700.01.T01  | DUF4220 domain-containing protein (Fragment)                     |
| augustus_masked-10-processed-gene-128.17-mRNA-1 | Indica | NA       |            | Os09g0543400 | OsR498G0407525900.01.T01  | Diaminopimelate decarboxylase 2 chloroplastic                    |
| augustus_masked-10-processed-gene-131.8-mRNA-1  | Indica | NA       |            | Os04g0125700 | OsR498G0407519500.01.T01  | Putative receptor-type protein kinase LRK1                       |
| augustus_masked-10-processed-gene-142.16-mRNA-1 | Indica | NA       |            |              |                           |                                                                  |
| augustus_masked-10-processed-gene-148.16-mRNA-1 | Indica | NA       | Kinase-TM  | Os04g0103500 | OsR498G0407421200.01.T01  | G-type lectin 5-receptor-like serine/threonine-protein kinase    |
| augustus_masked-10-processed-gene-155.25-mRNA-1 | Indica | NA       |            | Os10g0451700 | OsR498G1018827600.01.T01  | Transposon protein, putative, CACTA, En/Spm sub-class, expressed |
| augustus_masked-10-processed-gene-156.11-mRNA-1 | Indica | NA       |            | Os10g0453200 |                           | Putative retrotransposon protein ty3-gypsy subclass              |
| augustus_masked-10-processed-gene-156.8-mRNA-1  | Indica | NA       |            | Os10g0452900 | OsR498G1018830200.01.T01  | Glycine-rich cell wall structural protein 2                      |
| augustus_masked-10-processed-gene-159.40-mRNA-1 | Indica | NA       |            | Os10g0459700 | OsR498G1018848000.01.T01  | Xyloglucan galactosyltransferase KATAMARI1                       |
| augustus_masked-10-processed-gene-161.6-mRNA-1  | Indica | NA       |            |              | OsR498G1018855600.01.T01  |                                                                  |
| augustus_masked-10-processed-gene-25.16-mRNA-1  | Indica | NA       | LRR-NBS-TM | Os10g0136100 |                           | NB-ARC domain containing protein, expressed                      |
| augustus_masked-10-processed-gene-27.39-mRNA-1  | Indica | NA       |            | Os10g0139700 | OsR498G1018117600.01.T01  | Cytochrome P450 family 87 subfamily A polypeptide 6              |
| augustus_masked-10-processed-gene-28.25-mRNA-1  | Indica | NA       |            | Os10g0140700 | OsR498G1018118600.01.T01  |                                                                  |
| augustus_masked-10-processed-gene-28.27-mRNA-1  | Indica | NA       |            | Os10g0140300 | OsR498G1018119400.01.T01  | GDSL esterase/lipase                                             |
| augustus_masked-10-processed-gene-31.37-mRNA-1  | Indica | NA       |            | Os10g0147900 | OsR498G1018144800.01.T02  | Armadillo/beta-catenin-like repeat family protein, expressed     |
| augustus_masked-10-processed-gene-38.31-mRNA-1  | Indica | Japonica | Kinase     | Os10g0157400 | OsR498G1018162400.01.T01  | Putative cyclin-dependent kinase F-2                             |
| augustus_masked-10-processed-gene-39.19-mRNA-1  | Indica | NA       |            | Os10g0158100 | OsR498G1018179200.01.T01  | Very-long-chain 3-oxoacyl-CoA synthase                           |
| augustus_masked-10-processed-gene-41.11-mRNA-1  | Indica | NA       |            | Os10g0160100 | OsR498G1018192000.01.T01  | Glucan endo-1,3-beta-glucosidase 7                               |
| augustus_masked-10-processed-gene-5.20-mRNA-1   | Indica | NA       | Kinase-TM  | Os10g0104800 | OsR498G1018012400.01.T01  | Proline-rich receptor-like protein kinase PERK4                  |
| augustus_masked-10-processed-gene-50.39-mRNA-1  | Indica | NA       |            | Os12g0484600 | OsR498G0307220700.01.T01  | Nodulin-like domain-containing protein (Fragment)                |
| augustus_masked-10-processed-gene-51.21-mRNA-1  | Indica | Indica   |            | Os11g0708500 | OsR498G1018251600.01.T01  | Pyridoxal biosynthesis lyase pdx5                                |
| augustus_masked-10-processed-gene-54.31-mRNA-1  | Indica | Japonica | Kinase     | Os10g0174800 | OsR498G1018205800.01.T02  | Wall-associated receptor kinase 2                                |
| augustus_masked-10-processed-gene-66.35-mRNA-1  | Indica | NA       |            |              | OsR498G1018333000.01.T01  | PMD domain-containing protein                                    |
| augustus_masked-10-processed-gene-68.13-mRNA-1  | Indica | NA       |            |              | OsR498G0510213600.01.T01  |                                                                  |
| augustus_masked-10-processed-gene-87.19-mRNA-1  | Indica | Indica   |            | Os10g0213700 | OsR498G1018399800.01.T01  | Acidic leucine-rich nuclear phosphoprotein 32-related protein    |
| augustus_masked-10-processed-gene-92.4-mRNA-1   | Indica | NA       |            |              | OsR498G0203809100.01.T01  | DUF834 domain-containing protein                                 |
| augustus_masked-11-processed-gene-252.24-mRNA-1 | Indica | Indica   |            | Os11g0683800 | OsR498G1120730400.01.T01  | Pectinesterase                                                   |
| augustus_masked-11-processed-gene-253.37-mRNA-1 | Indica | NA       | NBS-TM     | Os11g0686900 | OsR498G1120736800.01.T01  | NBS-LRR disease resistance protein homologue-like                |
| augustus_masked-11-processed-gene-255.23-mRNA-1 | Indica | NA       |            |              | OsR498G0511458200.01.T01  |                                                                  |
| augustus_masked-11-processed-gene-259.30-mRNA-1 | Indica | NA       |            | Os10g0192300 | OsR498G0306363500.01.T01  | ATP-dependent DNA helicase                                       |
| augustus_masked-11-processed-gene-69.1-mRNA-1   | Indica | NA       |            |              | OsR498G0305447100.01.T01  |                                                                  |

|                                                 |        |          |               |              |                          |                                                           |
|-------------------------------------------------|--------|----------|---------------|--------------|--------------------------|-----------------------------------------------------------|
| augustus_masked-11-processed-gene-83.18-mRNA-1  | Indica | NA       | CC-LRR-NBS-TM |              |                          | NBS-LRR type protein (Fragment)                           |
| augustus_masked-11-processed-gene-84.45-mRNA-1  | Indica | Indica   |               | Os11g0231400 | OsR498G1119654600.01.T01 | F-box domain containing protein-like                      |
| augustus_masked-12-processed-gene-113.3-mRNA-1  | Indica | NA       |               | Os12g0288400 | OsR498G1221338800.01.T02 | E3 ubiquitin-protein ligase RGLG1                         |
| augustus_masked-12-processed-gene-117.13-mRNA-1 | Indica | NA       |               | Os12g0295600 |                          | Thioredoxin M-type                                        |
| augustus_masked-12-processed-gene-148.19-mRNA-1 | Indica | NA       |               |              | OsR498G1221454800.01.T01 |                                                           |
| augustus_masked-12-processed-gene-150.5-mRNA-1  | Indica | NA       |               |              | OsR498G0511427100.01.T01 | Epstein-Barr virus EBNA-1-like                            |
| augustus_masked-2-processed-gene-167.87-mRNA-1  | Indica | NA       |               |              | OsR498G0203808600.01.T01 |                                                           |
| augustus_masked-3-processed-gene-162.61-mRNA-1  | Indica | NA       |               |              | OsR498G0203810500.01.T01 |                                                           |
| augustus_masked-3-processed-gene-180.60-mRNA-1  | Indica | NA       |               | Os03g0370250 | OsR498G0306020800.01.T01 | GeBP transcription factor                                 |
| augustus_masked-3-processed-gene-185.22-mRNA-1  | Indica | NA       |               | Os03g0379500 | OsR498G0305248900.01.T01 | 30S ribosomal protein S4, chloroplastic                   |
| augustus_masked-3-processed-gene-192.19-mRNA-1  | Indica | NA       |               | Os03g0392300 | OsR498G0306092300.01.T01 | GTP-binding protein 1 isoform 2                           |
| augustus_masked-3-processed-gene-192.29-mRNA-1  | Indica | Indica   |               | Os04g0465100 | OsR498G0306091600.01.T01 | Peroxidase                                                |
| augustus_masked-3-processed-gene-192.30-mRNA-1  | Indica | NA       |               | Os03g0392400 | OsR498G0306092800.01.T02 | J domain-containing protein                               |
| augustus_masked-3-processed-gene-197.1-mRNA-1   | Indica | NA       |               | Os03g0397500 | OsR498G0306113900.01.T02 | Pre-mRNA-processing factor                                |
| augustus_masked-3-processed-gene-198.17-mRNA-1  | Indica | Japonica |               | Os03g0399800 | OsR498G0306125100.01.T01 | Mannose-binding lectin                                    |
| augustus_masked-3-processed-gene-199.47-mRNA-1  | Indica | NA       |               | Os03g0401200 | OsR498G0306131600.01.T01 | J domain-containing protein                               |
| augustus_masked-3-processed-gene-265.45-mRNA-1  | Indica | NA       |               |              | OsR498G1018686900.01.T02 | Exonuclease family protein, expressed                     |
| augustus_masked-3-processed-gene-283.22-mRNA-1  | Indica | NA       |               | Os10g0397800 | OsR498G1018652000.01.T02 | Solute carrier family 25 member 44                        |
| augustus_masked-3-processed-gene-299.2-mRNA-1   | Indica | NA       |               | Os10g0374200 | OsR498G1018572600.01.T01 |                                                           |
| augustus_masked-3-processed-gene-302.15-mRNA-1  | Indica | Indica   |               | Os03g0193000 | OsR498G1018558000.01.T02 | GRAS domain-containing protein (Fragment)                 |
| augustus_masked-3-processed-gene-302.25-mRNA-1  | Indica | NA       |               | Os10g0369500 | OsR498G1018557800.01.T01 | Yippee domain-containing protein                          |
| augustus_masked-3-processed-gene-302.27-mRNA-1  | Indica | NA       |               | Os10g0369000 | OsR498G1018557000.01.T01 | Glutamyl-tRNA synthetase                                  |
| augustus_masked-3-processed-gene-304.34-mRNA-1  | Indica | NA       |               | Os10g0363600 | OsR498G1018549300.01.T04 | F-box/kelch-repeat protein At1g22040                      |
| augustus_masked-3-processed-gene-306.0-mRNA-1   | Indica | NA       |               | Os10g0362300 | OsR498G1018542200.01.T02 | Histidine kinase                                          |
| augustus_masked-3-processed-gene-306.14-mRNA-1  | Indica | NA       |               | Os10g0361350 | OsR498G1018537100.01.T01 | PLAT domain-containing protein (Fragment)                 |
| augustus_masked-3-processed-gene-306.15-mRNA-1  | Indica | NA       |               |              | OsR498G1018537500.01.T01 |                                                           |
| augustus_masked-3-processed-gene-306.16-mRNA-1  | Indica | NA       |               | Os10g0361000 | OsR498G1018537100.01.T01 | PLAT domain-containing protein (Fragment)                 |
| augustus_masked-3-processed-gene-308.31-mRNA-1  | Indica | Indica   |               | Os03g0199100 | OsR498G1018531100.01.T01 |                                                           |
| augustus_masked-3-processed-gene-311.17-mRNA-1  | Indica | NA       |               |              |                          | Nucleoside phosphatase                                    |
| augustus_masked-3-processed-gene-312.16-mRNA-1  | Indica | NA       |               | Os10g0348600 | OsR498G1018516200.01.T01 | DUF4220 domain-containing protein (Fragment)              |
| augustus_masked-3-processed-gene-326.32-mRNA-1  | Indica | NA       |               | Os10g0327800 | OsR498G1018453300.01.T03 | Tyrosine-sulfated glycopeptide receptor 1                 |
| augustus_masked-3-processed-gene-327.12-mRNA-1  | Indica | NA       |               | Os10g0326400 | OsR498G1018446200.01.T01 | F-box domain containing protein, expressed                |
| augustus_masked-3-processed-gene-392.5-mRNA-1   | Indica | NA       |               |              | OsR498G0306695700.01.T01 |                                                           |
| augustus_masked-3-processed-gene-462.38-mRNA-1  | Indica | NA       |               |              | OsR498G0307158400.01.T01 | Pentatricopeptide repeat-containing protein (Fragment)    |
| augustus_masked-4-processed-gene-0.19-mRNA-1    | Indica | NA       |               | Os04g0169500 | OsR498G0407624000.01.T02 | Putative oxaloacetate decarboxylase gamma chain           |
| augustus_masked-4-processed-gene-1.39-mRNA-1    | Indica | Japonica |               | Os04g0172400 | OsR498G0407698300.01.T01 | Acyl transferase 15                                       |
| augustus_masked-4-processed-gene-111.43-mRNA-1  | Indica | NA       |               |              |                          | U11/U12 small nuclear ribonucleoprotein 48 kDa protein    |
| augustus_masked-4-processed-gene-112.15-mRNA-1  | Indica | Indica   |               | Os04g0350100 | OsR498G0408228000.01.T01 | Cysteine proteinase inhibitor B                           |
| augustus_masked-4-processed-gene-126.20-mRNA-1  | Indica | NA       |               |              | OsR498G0714707400.01.T01 |                                                           |
| augustus_masked-4-processed-gene-133.17-mRNA-1  | Indica | NA       |               | Os04g0382900 | OsR498G0408404100.01.T01 |                                                           |
| augustus_masked-4-processed-gene-136.25-mRNA-1  | Indica | NA       |               | Os04g0387600 | OsR498G0408425200.01.T01 |                                                           |
| augustus_masked-4-processed-gene-148.20-mRNA-1  | Indica | NA       |               |              | OsR498G0408512800.01.T01 | IQ calmodulin-binding motif family protein, expressed     |
| augustus_masked-4-processed-gene-150.28-mRNA-1  | Indica | NA       |               | Os04g0412400 |                          |                                                           |
| augustus_masked-4-processed-gene-153.9-mRNA-1   | Indica | NA       |               |              | OsR498G0408553000.01.T01 | Protein kinase domain-containing protein                  |
| augustus_masked-4-processed-gene-154.33-mRNA-1  | Indica | Japonica | Kinase-TM     | Os04g0420900 | OsR498G0408563300.01.T01 | Non-specific serine/threonine protein kinase (Fragment)   |
| augustus_masked-4-processed-gene-173.34-mRNA-1  | Indica | NA       |               |              | OsR498G0408681600.01.T02 | Sugar transport protein 5                                 |
| augustus_masked-4-processed-gene-176.60-mRNA-1  | Indica | NA       |               |              | OsR498G0408694600.01.T01 |                                                           |
| augustus_masked-4-processed-gene-204.64-mRNA-1  | Indica | NA       |               | Os04g0516200 | OsR498G0408895000.01.T03 | ALOG domain transcriptional regulator family protein 4-2A |
| augustus_masked-4-processed-gene-209.41-mRNA-1  | Indica | NA       |               | Os04g0523600 | OsR498G0408924200.01.T01 | Glycosyltransferase                                       |
| augustus_masked-4-processed-gene-209.42-mRNA-1  | Indica | NA       |               | Os04g0523700 | OsR498G0408924600.01.T01 | Glycosyltransferase                                       |
| augustus_masked-4-processed-gene-22.27-mRNA-1   | Indica | Indica   | Kinase-TM     | Os04g0202350 | OsR498G0407718200.01.T01 | Non-specific serine/threonine protein kinase              |
| augustus_masked-4-processed-gene-267.34-mRNA-1  | Indica | NA       |               |              | OsR498G0511458200.01.T01 |                                                           |
| augustus_masked-4-processed-gene-285.35-mRNA-1  | Indica | NA       |               | Os04g0664600 | OsR498G0409443400.01.T01 | Agmatine hydroxycinnamoyltransferase 1                    |
| augustus_masked-4-processed-gene-29.12-mRNA-1   | Indica | Japonica | CC-NBS-TM     | Os04g0219600 | OsR498G1119645400.01.T01 | NBS-LRR type protein (Fragment)                           |
| augustus_masked-4-processed-gene-30.25-mRNA-1   | Indica | Indica   |               | Os04g0221300 | OsR498G0407755600.01.T06 | Pentatricopeptide repeat-containing protein               |
| augustus_masked-4-processed-gene-34.26-mRNA-1   | Indica | NA       |               | Os04g0225100 | OsR498G0407765200.01.T01 | Werner syndrome ATP-dependent helicase                    |
| augustus_masked-4-processed-gene-51.9-mRNA-1    | Indica | Japonica |               | Os04g0258900 | OsR498G0407867000.01.T01 | F-box domain-containing protein                           |
| augustus_masked-4-processed-gene-87.12-mRNA-1   | Indica | NA       |               | Os04g0324100 | OsR498G0408099900.01.T01 | Glycosyltransferase                                       |
| augustus_masked-4-processed-gene-89.16-mRNA-1   | Indica | NA       |               | Os04g0317500 | OsR498G0408137500.01.T01 | Expansin-like CBD domain-containing protein               |
| augustus_masked-4-processed-gene-98.1-mRNA-1    | Indica | NA       |               |              | OsR498G0713442500.01.T01 |                                                           |
| augustus_masked-5-processed-gene-139.21-mRNA-1  | Indica | NA       |               | Os05g0302600 | OsR498G0510398900.01.T01 | TLC domain-containing protein (Fragment)                  |



|                                                |        |          |           |              |                          |                                                                              |
|------------------------------------------------|--------|----------|-----------|--------------|--------------------------|------------------------------------------------------------------------------|
| augustus_masked-5-processed-gene-140.24-mRNA-1 | Indica | NA       |           | Os05g0304800 | OsR498G0510409700.01.T01 | Nuclear factor Y transcription factor                                        |
| augustus_masked-5-processed-gene-150.18-mRNA-1 | Indica | NA       |           | Os12g0468900 | OsR498G0917373300.01.T01 | Cell wall protein-like                                                       |
| augustus_masked-5-processed-gene-155.32-mRNA-1 | Indica | Indica   |           | Os12g0468900 | OsR498G0510503700.01.T01 | Cell wall protein-like                                                       |
| augustus_masked-5-processed-gene-155.34-mRNA-1 | Indica | NA       |           | Os05g0326400 | OsR498G0510504100.01.T02 |                                                                              |
| augustus_masked-5-processed-gene-160.12-mRNA-1 | Indica | NA       |           | Os05g0330600 | OsR498G0510523500.01.T01 | Putative prolamin 7                                                          |
| augustus_masked-5-processed-gene-161.28-mRNA-1 | Indica | NA       |           | Os05g0331550 | OsR498G0510526000.01.T01 | Putative prolamin 7                                                          |
| augustus_masked-5-processed-gene-161.9-mRNA-1  | Indica | NA       | Kinase-TM | Os05g0332300 | OsR498G0510529300.01.T01 | Non-specific serine/threonine protein kinase                                 |
| augustus_masked-5-processed-gene-169.12-mRNA-1 | Indica | Japonica |           | Os07g0433200 | OsR498G0510328900.01.T01 | Retrotransposon protein, putative, Ty1-copia subclass                        |
| augustus_masked-5-processed-gene-183.26-mRNA-1 | Indica | Indica   |           | Os05g0365000 | OsR498G0510671900.01.T01 | phytochrome A-associated F-box protein isoform X1                            |
| augustus_masked-5-processed-gene-183.36-mRNA-1 | Indica | NA       |           | Os05g0365500 | OsR498G0510674100.01.T01 | Pentatricopeptide repeat                                                     |
| augustus_masked-5-processed-gene-187.21-mRNA-1 | Indica | NA       |           | Os05g0370600 | OsR498G0510692500.01.T06 | FT-interacting protein 1-like                                                |
| augustus_masked-5-processed-gene-189.55-mRNA-1 | Indica | NA       |           | Os05g0373900 | OsR498G0510704700.01.T02 | Eukaryotic peptide chain release factor subunit                              |
| augustus_masked-5-processed-gene-191.20-mRNA-1 | Indica | NA       |           | Os04g0499100 | OsR498G0611743600.01.T01 | Folate-biopterin transporter                                                 |
| augustus_masked-5-processed-gene-213.18-mRNA-1 | Indica | NA       |           | Os05g0413000 | OsR498G0510836900.01.T02 |                                                                              |
| augustus_masked-5-processed-gene-213.32-mRNA-1 | Indica | NA       | CC-NBS-TM |              | OsR498G0510842500.01.T01 | Putative disease resistance RPP13-like protein 1                             |
| augustus_masked-5-processed-gene-266.30-mRNA-1 | Indica | NA       |           | Os05g0514500 | OsR498G0511177100.01.T01 | Interactor of constitutive active ROPs 1                                     |
| augustus_masked-5-processed-gene-280.46-mRNA-1 | Indica | NA       |           | Os05g0541400 | OsR498G0511268300.01.T01 | Transcription factor bHLH87                                                  |
| augustus_masked-5-processed-gene-282.8-mRNA-1  | Indica | Japonica |           | Os05g0546300 | OsR498G0511285700.01.T01 |                                                                              |
| augustus_masked-5-processed-gene-283.54-mRNA-1 | Indica | Japonica |           | Os05g0548600 | OsR498G0511288100.01.T01 | NOP5NT domain-containing protein                                             |
| augustus_masked-5-processed-gene-286.37-mRNA-1 | Indica | NA       |           |              |                          | t-SNARE coiled-coil homology domain-containing protein (Fragment)            |
| augustus_masked-5-processed-gene-286.47-mRNA-1 | Indica | NA       |           |              |                          | CDP-diacylglycerol--serine O-phosphatidyltransferase 1-like                  |
| augustus_masked-5-processed-gene-292.28-mRNA-1 | Indica | NA       |           | Os05g0564200 | OsR498G0511348300.01.T03 | Splicing factor U2af small subunit B                                         |
| augustus_masked-5-processed-gene-293.0-mRNA-1  | Indica | NA       |           |              | OsR498G0511354700.01.T05 | FCP1 homology domain-containing protein                                      |
| augustus_masked-5-processed-gene-294.11-mRNA-1 | Indica | NA       |           |              | OsR498G0511363900.01.T01 |                                                                              |
| augustus_masked-5-processed-gene-294.12-mRNA-1 | Indica | NA       |           | Os05g0568600 |                          |                                                                              |
| augustus_masked-5-processed-gene-294.14-mRNA-1 | Indica | NA       |           | Os05g0568800 | OsR498G0511364900.01.T01 |                                                                              |
| augustus_masked-5-processed-gene-294.15-mRNA-1 | Indica | NA       |           | Os05g0569100 |                          | Reverse transcriptase Ty1/copia-type domain-containing protein               |
| augustus_masked-5-processed-gene-295.29-mRNA-1 | Indica | NA       |           |              | OsR498G0511371100.01.T01 | Reverse transcriptase Ty1/copia-type domain-containing protein               |
| augustus_masked-5-processed-gene-295.30-mRNA-1 | Indica | NA       |           | Os05g0571100 | OsR498G0511372100.01.T01 | PORR domain-containing protein                                               |
| augustus_masked-5-processed-gene-299.37-mRNA-1 | Indica | NA       |           | Os05g0578500 | OsR498G0511397100.01.T02 | Cinnamoyl-CoA reductase-like SNL6                                            |
| augustus_masked-5-processed-gene-65.3-mRNA-1   | Indica | NA       |           | Os05g0205400 |                          |                                                                              |
| augustus_masked-5-processed-gene-65.8-mRNA-1   | Indica | NA       |           | Os05g0206000 |                          |                                                                              |
| augustus_masked-5-processed-gene-65.9-mRNA-1   | Indica | NA       |           | Os05g0206100 |                          |                                                                              |
| augustus_masked-5-processed-gene-71.9-mRNA-1   | Indica | NA       |           | Os05g0215600 | OsR498G0510025900.01.T02 |                                                                              |
| augustus_masked-6-processed-gene-102.20-mRNA-1 | Indica | NA       |           | Os06g0288200 | OsR498G0612167300.01.T01 | C-glycosyltransferase                                                        |
| augustus_masked-6-processed-gene-102.3-mRNA-1  | Indica | NA       | NBS-TM    |              | OsR498G0612165700.01.T01 | Disease resistance protein RPM1                                              |
| augustus_masked-6-processed-gene-102.31-mRNA-1 | Indica | NA       | Kinase-TM | Os06g0288100 | OsR498G0612167200.01.T01 | Leucine-rich repeat receptor-like serine/threonine/tyrosine-protein kinase S |
| augustus_masked-6-processed-gene-103.24-mRNA-1 | Indica | Indica   |           | Os06g0289900 | OsR498G0612168500.01.T01 | C-glycosyltransferase                                                        |
| augustus_masked-6-processed-gene-103.3-mRNA-1  | Indica | NA       |           | Os06g0289200 | OsR498G0612167500.01.T01 | C-glycosyltransferase                                                        |
| augustus_masked-6-processed-gene-206.15-mRNA-1 | Indica | NA       |           | Os06g0548100 | OsR498G0612721800.01.T01 | Berberine bridge enzyme-like 28                                              |
| augustus_masked-6-processed-gene-236.10-mRNA-1 | Indica | NA       |           | Os06g0597500 | OsR498G0612883400.01.T01 | Pentatricopeptide repeat-containing protein mitochondrial                    |
| augustus_masked-6-processed-gene-236.15-mRNA-1 | Indica | Japonica |           | Os06g0599200 | OsR498G0204145300.01.T01 | Oryzaalexin D synthase                                                       |
| augustus_masked-6-processed-gene-236.3-mRNA-1  | Indica | NA       |           | Os06g0597800 |                          |                                                                              |
| augustus_masked-6-processed-gene-257.23-mRNA-1 | Indica | NA       |           | Os12g0265500 | OsR498G1221250300.01.T01 | HAT family dimerisation domain containing protein, expressed                 |
| augustus_masked-6-processed-gene-26.27-mRNA-1  | Indica | NA       |           |              | OsR498G0511427100.01.T01 | Epstein-Barr virus EBNA-1-like                                               |
| augustus_masked-6-processed-gene-28.1-mRNA-1   | Indica | NA       |           |              | OsR498G0611640900.01.T01 |                                                                              |
| augustus_masked-6-processed-gene-293.18-mRNA-1 | Indica | NA       |           | Os06g0697500 | OsR498G0613242700.01.T01 | Adenosinetriphosphatase                                                      |
| augustus_masked-6-processed-gene-294.12-mRNA-1 | Indica | NA       |           | Os06g0697600 | OsR498G0613243200.01.T01 | Adenosinetriphosphatase                                                      |
| augustus_masked-6-processed-gene-294.22-mRNA-1 | Indica | NA       |           | Os06g0698600 | OsR498G0613245900.01.T01 | Exocyst subunit Exo70 family protein (Fragment)                              |
| augustus_masked-6-processed-gene-295.37-mRNA-1 | Indica | NA       | Kinase-TM | Os06g0699400 | OsR498G0613249300.01.T03 | Mitogen-activated protein kinase                                             |
| augustus_masked-6-processed-gene-295.52-mRNA-1 | Indica | NA       |           | Os06g0700000 | OsR498G0613251700.01.T01 | Subtilisin-like serine protease                                              |
| augustus_masked-6-processed-gene-295.53-mRNA-1 | Indica | NA       |           | Os06g0700100 | OsR498G0613251900.01.T01 | Pentatricopeptide repeat-containing protein                                  |
| augustus_masked-6-processed-gene-296.7-mRNA-1  | Indica | Indica   |           | Os01g0532700 | OsR498G0613255900.01.T01 |                                                                              |
| augustus_masked-6-processed-gene-297.26-mRNA-1 | Indica | NA       |           | Os06g0702400 | OsR498G0613262800.01.T01 |                                                                              |
| augustus_masked-6-processed-gene-299.1-mRNA-1  | Indica | NA       |           | Os06g0704100 | OsR498G0613270100.01.T01 | Ternary complex factor MIP1, leucine-zipper                                  |
| augustus_masked-6-processed-gene-300.24-mRNA-1 | Indica | Indica   | Kinase    | Os02g0623600 | OsR498G0613277600.01.T01 | Putative tyrosine-protein kinase, insulin-like receptor                      |
| augustus_masked-6-processed-gene-301.13-mRNA-1 | Indica | NA       |           | Os06g0709000 | OsR498G0613284300.01.T01 | Arogenate dehydrogenase alpha                                                |
| augustus_masked-6-processed-gene-302.26-mRNA-1 | Indica | NA       |           | Os06g0711800 | OsR498G0613289800.01.T02 | PMEI domain-containing protein (Fragment)                                    |
| augustus_masked-6-processed-gene-302.6-mRNA-1  | Indica | Indica   |           | Os06g0710900 | OsR498G0613287200.01.T01 | Translation initiation factor IF-2-like                                      |
| augustus_masked-6-processed-gene-302.7-mRNA-1  | Indica | NA       |           | Os06g0711000 | OsR498G0613287400.01.T01 |                                                                              |
| augustus_masked-6-processed-gene-302.8-mRNA-1  | Indica | NA       |           | Os06g0711700 | OsR498G0613288400.01.T01 | F-box/kelch-repeat protein SKIP25                                            |

|                                                |        |          |           |              |                          |                                                                          |
|------------------------------------------------|--------|----------|-----------|--------------|--------------------------|--------------------------------------------------------------------------|
| augustus_masked-6-processed-gene-303.39-mRNA-1 | Indica | Indica   |           | Os06g0713000 | OsR498G0613296500.01.T01 | Zinc finger protein CONSTANS                                             |
| augustus_masked-6-processed-gene-304.44-mRNA-1 | Indica | NA       |           | Os06g0714300 | OsR498G0613300200.01.T02 | Auxin-responsive protein SAUR32                                          |
| augustus_masked-6-processed-gene-304.50-mRNA-1 | Indica | NA       |           | Os06g0715200 |                          | DNA ligase 3 (Fragment)                                                  |
| augustus_masked-6-processed-gene-304.60-mRNA-1 | Indica | Japonica |           | Os06g0714600 | OsR498G0917833300.01.T01 | Ras-related protein RABA3                                                |
| augustus_masked-6-processed-gene-304.61-mRNA-1 | Indica | NA       |           | Os06g0714700 | OsR498G0613301800.01.T01 |                                                                          |
| augustus_masked-6-processed-gene-304.62-mRNA-1 | Indica | NA       |           |              | OsR498G0613302000.01.T05 | DNA-directed RNA polymerase II subunit RPB2                              |
| augustus_masked-6-processed-gene-305.1-mRNA-1  | Indica | NA       |           | Os06g0716100 | OsR498G0613306500.01.T01 | J domain-containing protein (Fragment)                                   |
| augustus_masked-6-processed-gene-305.23-mRNA-1 | Indica | Indica   |           | Os06g0716800 | OsR498G0613307800.01.T01 | Basic-leucine zipper transcription factor                                |
| augustus_masked-6-processed-gene-305.28-mRNA-1 | Indica | NA       |           |              | OsR498G0613312200.01.T01 |                                                                          |
| augustus_masked-6-processed-gene-305.6-mRNA-1  | Indica | NA       |           | Os07g0543700 | OsR498G1120733700.01.T01 | 4-diphosphocytidyl-2C-methyl-D-erythritol synthase                       |
| augustus_masked-6-processed-gene-308.25-mRNA-1 | Indica | NA       |           |              |                          | Non-specific serine/threonine protein kinase                             |
| augustus_masked-6-processed-gene-308.35-mRNA-1 | Indica | Indica   |           | Os06g0725700 | OsR498G0613330300.01.T01 |                                                                          |
| augustus_masked-6-processed-gene-309.47-mRNA-1 | Indica | Indica   |           | Os06g0727700 | OsR498G0613335700.01.T03 | Storage protein-like                                                     |
| augustus_masked-6-processed-gene-309.56-mRNA-1 | Indica | NA       |           | Os06g0727000 | OsR498G0613333800.01.T01 | Zinc finger protein ZAT3-like                                            |
| augustus_masked-6-processed-gene-310.34-mRNA-1 | Indica | Japonica |           | Os06g0727900 | OsR498G0613336100.01.T01 | Glycosyltransferase family 92 protein (Fragment)                         |
| augustus_masked-6-processed-gene-310.37-mRNA-1 | Indica | NA       |           | Os06g0728500 | OsR498G0613337700.01.T04 | Translation initiation factor IF-2-like                                  |
| augustus_masked-6-processed-gene-43.10-mRNA-1  | Indica | Indica   |           | Os06g0185500 | OsR498G0611739300.01.T01 | Putrescine hydroxycinnamoyltransferase 2                                 |
| augustus_masked-6-processed-gene-43.21-mRNA-1  | Indica | NA       |           | Os06g0184866 | OsR498G0611738000.01.T01 | Pentatricopeptide repeat-containing protein mitochondrial                |
| augustus_masked-6-processed-gene-43.23-mRNA-1  | Indica | NA       |           |              |                          |                                                                          |
| augustus_masked-6-processed-gene-43.8-mRNA-1   | Indica | NA       |           | Os06g0184900 | OsR498G0611738500.01.T01 | Hydroxycinnamoyl-CoA quinate hydroxycinnamoyltransferase                 |
| augustus_masked-6-processed-gene-44.42-mRNA-1  | Indica | NA       |           | Os06g0185700 | OsR498G0611740100.01.T01 | Pentatricopeptide repeat-containing protein mitochondrial                |
| augustus_masked-6-processed-gene-44.48-mRNA-1  | Indica | Japonica |           | Os06g0185800 | OsR498G0611740600.01.T01 | Pentatricopeptide repeat-containing protein isoform X1                   |
| augustus_masked-6-processed-gene-44.56-mRNA-1  | Indica | NA       |           |              | OsR498G0611745700.01.T01 | Putative RING-H2 finger protein ATL49                                    |
| augustus_masked-6-processed-gene-44.65-mRNA-1  | Indica | NA       |           |              | OsR498G0611744000.01.T01 | RING-type domain-containing protein                                      |
| augustus_masked-6-processed-gene-49.31-mRNA-1  | Indica | Indica   |           | Os07g0110200 | OsR498G0611778200.01.T02 | Nucleolar GTP-binding protein 1                                          |
| augustus_masked-6-processed-gene-49.32-mRNA-1  | Indica | NA       |           | Os06g0196200 | OsR498G0611779600.01.T01 |                                                                          |
| augustus_masked-6-processed-gene-56.40-mRNA-1  | Indica | Indica   |           | Os02g0768700 | OsR498G0611835500.01.T02 | GeBP transcription factor (Fragment)                                     |
| augustus_masked-6-processed-gene-57.30-mRNA-1  | Indica | NA       |           | Os06g0210300 |                          | Ethylene-responsive transcription factor ERF014                          |
| augustus_masked-6-processed-gene-57.31-mRNA-1  | Indica | NA       |           | Os06g0210500 | OsR498G0611837900.01.T01 | Mitochondrial phosphate carrier protein like                             |
| augustus_masked-6-processed-gene-57.46-mRNA-1  | Indica | Japonica | Kinase-TM | Os06g0210400 | OsR498G1019094500.01.T01 | Mitogen-activated protein kinase kinase kinase                           |
| augustus_masked-6-processed-gene-57.47-mRNA-1  | Indica | NA       |           |              | OsR498G0611837800.01.T01 | RING-type E3 ubiquitin transferase                                       |
| augustus_masked-6-processed-gene-58.29-mRNA-1  | Indica | Japonica |           | Os06g0212600 | OsR498G0204823700.01.T01 | Fucosyltransferase                                                       |
| augustus_masked-6-processed-gene-58.3-mRNA-1   | Indica | NA       |           |              | OsR498G0611842100.01.T01 | Scarecrow-like protein 3                                                 |
| augustus_masked-6-processed-gene-59.18-mRNA-1  | Indica | NA       |           |              | OsR498G0611846900.01.T01 | Putative 41 kD chloroplast nucleoid DNA binding protein                  |
| augustus_masked-6-processed-gene-59.23-mRNA-1  | Indica | Indica   |           | Os02g0762900 | OsR498G0611848400.01.T01 | Polcalcine Syr v 3-like                                                  |
| augustus_masked-6-processed-gene-59.28-mRNA-1  | Indica | NA       |           | Os06g0213900 | OsR498G0611849700.01.T01 |                                                                          |
| augustus_masked-6-processed-gene-60.36-mRNA-1  | Indica | NA       |           | Os06g0215100 | OsR498G0611853300.01.T01 |                                                                          |
| augustus_masked-6-processed-gene-60.49-mRNA-1  | Indica | Indica   |           | Os10g0122000 | OsR498G0611856800.01.T01 | Glycosyltransferase                                                      |
| augustus_masked-6-processed-gene-60.53-mRNA-1  | Indica | NA       |           | Os06g0216400 | OsR498G0611857800.01.T01 | Transcription factor EMB1444                                             |
| augustus_masked-6-processed-gene-61.17-mRNA-1  | Indica | Indica   |           | Os06g0217500 | OsR498G0611860600.01.T05 | RNA polymerase II transcriptional regulation mediator                    |
| augustus_masked-6-processed-gene-62.41-mRNA-1  | Indica | NA       |           | Os06g0218800 |                          |                                                                          |
| augustus_masked-6-processed-gene-63.45-mRNA-1  | Indica | NA       |           | Os06g0219800 | OsR498G0611870800.01.T02 | Serine/threonine-protein phosphatase 2A activator                        |
| augustus_masked-6-processed-gene-63.46-mRNA-1  | Indica | NA       |           | Os06g0219900 | OsR498G0611871000.01.T01 | EXORDIUM like 2                                                          |
| augustus_masked-6-processed-gene-64.15-mRNA-1  | Indica | NA       |           | Os06g0220900 | OsR498G0611875500.01.T01 |                                                                          |
| augustus_masked-6-processed-gene-78.17-mRNA-1  | Indica | NA       |           | Os06g0247800 | OsR498G0611996700.01.T05 | Dynamin GTPase                                                           |
| augustus_masked-6-processed-gene-89.31-mRNA-1  | Indica | NA       |           | Os06g0265900 | OsR498G0612062300.01.T01 | PORR domain-containing protein (Fragment)                                |
| augustus_masked-6-processed-gene-91.11-mRNA-1  | Indica | NA       |           |              | OsR498G1221332900.01.T01 | Retrotransposon protein, putative, unclassified                          |
| augustus_masked-6-processed-gene-92.22-mRNA-1  | Indica | NA       |           | Os06g0271000 | OsR498G0612075700.01.T01 | UDP-glycosyltransferase 90A1                                             |
| augustus_masked-6-processed-gene-94.23-mRNA-1  | Indica | NA       |           | Os06g0275500 | OsR498G0612092700.01.T01 | Histone-lysine N-methyltransferase EZ1                                   |
| augustus_masked-8-processed-gene-153.21-mRNA-1 | Indica | NA       |           | Os08g0334900 | OsR498G0815812500.01.T01 | Fucosyltransferase                                                       |
| augustus_masked-8-processed-gene-161.8-mRNA-1  | Indica | NA       |           | Os08g0346400 | OsR498G0815852300.01.T01 | HTH myb-type domain-containing protein                                   |
| augustus_masked-8-processed-gene-165.0-mRNA-1  | Indica | Indica   |           | Os08g0351200 | OsR498G0815866300.01.T03 |                                                                          |
| augustus_masked-8-processed-gene-191.12-mRNA-1 | Indica | NA       |           | Os08g0375700 | OsR498G0815952700.01.T01 | O-fucosyltransferase family protein                                      |
| augustus_masked-8-processed-gene-193.0-mRNA-1  | Indica | NA       |           |              |                          | Phospholipid-transporting ATPase                                         |
| augustus_masked-8-processed-gene-194.11-mRNA-1 | Indica | Indica   |           | Os08g0381600 | OsR498G0815968100.01.T01 | thaumatin-like protein isoform X1                                        |
| augustus_masked-8-processed-gene-195.42-mRNA-1 | Indica | Indica   |           | Os05g0510100 | OsR498G0815976100.01.T01 |                                                                          |
| augustus_masked-8-processed-gene-200.9-mRNA-1  | Indica | NA       |           |              | OsR498G0816003100.01.T01 |                                                                          |
| augustus_masked-8-processed-gene-212.0-mRNA-1  | Indica | NA       |           |              | OsR498G0816082900.01.T03 | NHL domain-containing protein                                            |
| augustus_masked-8-processed-gene-215.10-mRNA-1 | Indica | Japonica |           | Os08g0421700 | OsR498G0816100100.01.T01 | CCHC-type domain-containing protein                                      |
| augustus_masked-8-processed-gene-223.4-mRNA-1  | Indica | NA       |           | Os08g0433300 | OsR498G0816148900.01.T01 | Glycosyl hydrolase, five-bladed beta-propellor domain-containing protein |
| augustus_masked-8-processed-gene-225.11-mRNA-1 | Indica | NA       |           |              | OsR498G0816160100.01.T01 | Zinc finger A20 and AN1 domain-containing stress-associated protein 9    |

|                                                |        |          |               |              |                          |                                                                           |
|------------------------------------------------|--------|----------|---------------|--------------|--------------------------|---------------------------------------------------------------------------|
| augustus_masked-8-processed-gene-227.32-mRNA-1 | Indica | NA       |               | Os08g0439600 | OsR498G0816169900.01.T01 |                                                                           |
| augustus_masked-8-processed-gene-227.33-mRNA-1 | Indica | NA       |               | Os08g0439900 | OsR498G0816170300.01.T01 | Mitochondrial glycoprotein family protein, putative                       |
| augustus_masked-8-processed-gene-228.11-mRNA-1 | Indica | Indica   | Kinase-TM     | Os08g0441100 | OsR498G0816176500.01.T01 | Non-specific serine/threonine protein kinase                              |
| augustus_masked-8-processed-gene-230.11-mRNA-1 | Indica | Indica   |               | Os07g0597625 | OsR498G0816195700.01.T01 | Glyoxylate/hydroxyypyruvate reductase HPR3                                |
| augustus_masked-8-processed-gene-232.17-mRNA-1 | Indica | NA       |               | Os08g0450100 | OsR498G0816215500.01.T01 | Pectinesterase                                                            |
| augustus_masked-8-processed-gene-232.18-mRNA-1 | Indica | NA       |               | Os08g0450100 | OsR498G0816215500.01.T01 | Pectinesterase                                                            |
| augustus_masked-8-processed-gene-260.36-mRNA-1 | Indica | NA       |               | Os08g0499800 | OsR498G0816397900.01.T02 | Pentatricopeptide repeat-containing protein mitochondrial                 |
| augustus_masked-8-processed-gene-260.48-mRNA-1 | Indica | NA       |               | Os08g0500500 | OsR498G0816401500.01.T01 | DNA-binding protein-like                                                  |
| augustus_masked-8-processed-gene-276.75-mRNA-1 | Indica | NA       |               | Os08g0529400 |                          | F-box domain-containing protein                                           |
| augustus_masked-8-processed-gene-277.11-mRNA-1 | Indica | NA       |               | Os08g0530300 | OsR498G0816515500.01.T01 | Exocyst subunit Exo70 family protein (Fragment)                           |
| augustus_masked-8-processed-gene-30.14-mRNA-1  | Indica | NA       |               |              |                          |                                                                           |
| augustus_masked-8-processed-gene-31.12-mRNA-1  | Indica | NA       |               | Os08g0150800 | OsR498G0815197900.01.T01 | Tyrosyl-tRNA synthetase                                                   |
| augustus_masked-8-processed-gene-33.2-mRNA-1   | Indica | NA       | CC-NBS-TM     |              | OsR498G0815208900.01.T01 | NB-ARC domain containing protein, expressed                               |
| augustus_masked-8-processed-gene-36.1-mRNA-1   | Indica | NA       |               |              | OsR498G0815232500.01.T01 | TF-B3 domain-containing protein (Fragment)                                |
| augustus_masked-8-processed-gene-36.9-mRNA-1   | Indica | NA       |               | Os08g0159000 | OsR498G0815236700.01.T01 | DnaJ homolog subfamily C member 2                                         |
| augustus_masked-8-processed-gene-41.20-mRNA-1  | Indica | NA       |               |              | OsR498G0815268900.01.T01 | Serine-rich protein-related                                               |
| augustus_masked-8-processed-gene-42.1-mRNA-1   | Indica | NA       |               | Os08g0168600 | OsR498G0815272900.01.T01 | Glycosyltransferase                                                       |
| augustus_masked-9-processed-gene-102.1-mRNA-1  | Indica | NA       |               | Os09g0332100 | OsR498G0917174700.01.T01 |                                                                           |
| augustus_masked-9-processed-gene-110.29-mRNA-1 | Indica | NA       |               | Os09g0342000 | OsR498G0917198400.01.T01 | CRIB domain-containing protein                                            |
| augustus_masked-9-processed-gene-143.9-mRNA-1  | Indica | NA       |               |              |                          |                                                                           |
| augustus_masked-9-processed-gene-73.12-mRNA-1  | Indica | NA       |               | Os09g0292900 | OsR498G0916991700.01.T01 | Kelch repeat-containing F-box-like protein                                |
| augustus_masked-9-processed-gene-8.3-mRNA-1    | Indica | NA       |               | Os02g0212975 | OsR498G0202873200.01.T01 |                                                                           |
| maker-1-augustus-gene-10.28-mRNA-1             | Indica | NA       |               | Os01g0117900 | OsR498G0100057100.01.T04 |                                                                           |
| maker-1-augustus-gene-10.31-mRNA-1             | Indica | Japonica |               | Os01g0118000 | OsR498G1119486400.01.T02 | Fructose-bisphosphate aldolase                                            |
| maker-1-augustus-gene-10.34-mRNA-1             | Indica | NA       |               |              | OsR498G0100057700.01.T05 | DEXH-box ATP-dependent RNA helicase DEXH3                                 |
| maker-1-augustus-gene-10.40-mRNA-1             | Indica | NA       |               |              |                          | CDP-diacylglycerol--serine O-phosphatidyltransferase 1 isoform X1         |
| maker-1-augustus-gene-14.60-mRNA-1             | Indica | Indica   |               | Os01g0127000 | OsR498G0100088600.01.T01 | Multicopper oxidase LPR1                                                  |
| maker-1-augustus-gene-14.63-mRNA-1             | Indica | Indica   |               | Os01g0127200 | OsR498G0100089400.01.T01 | Multicopper oxidase LPR1                                                  |
| maker-1-augustus-gene-14.66-mRNA-1             | Indica | NA       |               | Os01g0127300 | OsR498G0100089600.01.T01 | Protein ABCI7 chloroplastic                                               |
| maker-1-augustus-gene-15.29-mRNA-1             | Indica | Indica   |               | Os01g0127400 | OsR498G0100089700.01.T04 | HTH myb-type domain-containing protein                                    |
| maker-1-augustus-gene-15.31-mRNA-1             | Indica | NA       |               | Os01g0127500 | OsR498G0100089900.01.T01 | Tetraketide alpha-pyrone reductase                                        |
| maker-1-augustus-gene-15.35-mRNA-1             | Indica | NA       |               | Os01g0127900 | OsR498G0100091900.01.T02 | Mannose-6-phosphate isomerase                                             |
| maker-1-augustus-gene-16.30-mRNA-1             | Indica | NA       |               | Os01g0129950 |                          |                                                                           |
| maker-1-augustus-gene-16.32-mRNA-1             | Indica | NA       |               | Os01g0130400 | OsR498G0100104900.01.T01 | Alpha-xylosidase 1                                                        |
| maker-1-augustus-gene-16.36-mRNA-1             | Indica | NA       |               | Os01g0130000 | OsR498G0100102600.01.T02 | Metal tolerance protein 5                                                 |
| maker-1-augustus-gene-17.0-mRNA-1              | Indica | NA       |               |              | OsR498G0100109900.01.T01 | AP2/ERF domain-containing protein                                         |
| maker-1-augustus-gene-17.11-mRNA-1             | Indica | Japonica |               | Os01g0132000 | OsR498G0100111200.01.T01 | Wound-induced serine protease inhibitor                                   |
| maker-1-augustus-gene-17.13-mRNA-1             | Indica | NA       |               | Os01g0132400 | OsR498G0100113200.01.T01 |                                                                           |
| maker-1-augustus-gene-17.15-mRNA-1             | Indica | NA       |               | Os01g0132700 | OsR498G0100113600.01.T05 | Mediator of RNA polymerase II transcription subunit 22b like              |
| maker-1-augustus-gene-17.18-mRNA-1             | Indica | NA       |               | Os01g0132800 |                          | Chloroplastic group IIB intron splicing facilitator CRS2-B, chloroplastic |
| maker-1-augustus-gene-17.2-mRNA-1              | Indica | NA       |               | Os01g0131800 | OsR498G0100110900.01.T01 | Signal peptidase subunit                                                  |
| maker-1-augustus-gene-17.7-mRNA-1              | Indica | Indica   |               | Os01g0132500 | OsR498G0100113300.01.T01 | RNA polymerase-associated protein (Fragment)                              |
| maker-1-augustus-gene-17.9-mRNA-1              | Indica | NA       |               | Os01g0131900 | OsR498G0100111200.01.T01 | Wound-induced serine protease inhibitor                                   |
| maker-1-augustus-gene-18.0-mRNA-1              | Indica | Indica   |               | Os01g0133100 | OsR498G0100115900.01.T01 | VARLMGL domain-containing protein                                         |
| maker-1-augustus-gene-18.13-mRNA-1             | Indica | Indica   |               | Os01g0133700 | OsR498G0100117100.01.T01 | Core-2/l-branching beta-16-N-acetylglucosaminyltransferase family protein |
| maker-1-augustus-gene-18.15-mRNA-1             | Indica | Japonica |               | Os01g0133700 | OsR498G0100117500.01.T01 | Core-2/l-branching beta-16-N-acetylglucosaminyltransferase family protein |
| maker-1-augustus-gene-18.17-mRNA-1             | Indica | NA       | Kinase-LRR-TM | Os01g0133900 | OsR498G0100117900.01.T02 | probable leucine-rich repeat receptor-like protein kinase At1g68400       |
| maker-1-augustus-gene-18.20-mRNA-1             | Indica | NA       |               | Os06g0313260 |                          | Epimerase domain-containing protein                                       |
| maker-1-augustus-gene-18.22-mRNA-1             | Indica | NA       |               | Os01g0134500 | OsR498G0100119100.01.T01 | Aldehyde oxygenase (deformylating)                                        |
| maker-1-augustus-gene-18.3-mRNA-1              | Indica | NA       |               | Os01g0133400 | OsR498G0100116700.01.T02 | Plastidic glucose transporter like                                        |
| maker-1-augustus-gene-18.9-mRNA-1              | Indica | NA       |               | Os01g0133500 | OsR498G0100116900.01.T07 | Metallo-hydrolase/oxidoreductase superfamily protein                      |
| maker-1-augustus-gene-19.0-mRNA-1              | Indica | NA       |               | Os01g0134700 | OsR498G0100119500.01.T01 | Protein SAR DEFICIENT 1 isoform B                                         |
| maker-1-augustus-gene-19.10-mRNA-1             | Indica | NA       |               | Os01g0136400 | OsR498G0100125200.01.T03 | Putative receptor serine/threonine kinase PR5K                            |
| maker-1-augustus-gene-19.21-mRNA-1             | Indica | NA       | Kinase-TM     | Os01g0136800 | OsR498G0100126800.01.T01 | WAK2-OsWAK receptor-like cytoplasmic kinase (OsWAK-RLCK)                  |
| maker-1-augustus-gene-19.3-mRNA-1              | Indica | Indica   |               | Os01g0137100 | OsR498G0100127300.01.T01 | Putative receptor serine/threonine kinase PR5K                            |
| maker-1-augustus-gene-19.9-mRNA-1              | Indica | NA       | Kinase-TM     |              | OsR498G0100125200.01.T02 | Putative serine/threonine-protein kinase                                  |
| maker-1-augustus-gene-20.0-mRNA-1              | Indica | NA       | Kinase-TM     |              |                          | Protein kinase domain-containing protein (Fragment)                       |
| maker-1-augustus-gene-20.11-mRNA-1             | Indica | NA       | Kinase-TM     |              |                          | Putative receptor serine/threonine kinase PR5K                            |
| maker-1-augustus-gene-20.13-mRNA-1             | Indica | NA       | Kinase-TM     |              | OsR498G0100130500.01.T01 | Putative receptor serine/threonine kinase PR5K                            |
| maker-1-augustus-gene-20.18-mRNA-1             | Indica | NA       | Kinase-TM     |              |                          | Protein kinase domain-containing protein (Fragment)                       |
| maker-1-augustus-gene-20.20-mRNA-1             | Indica | Indica   |               | Os06g0586600 | OsR498G0100130200.01.T01 | Transposon protein, putative, CACTA, En/Spm sub-class                     |

|                                     |        |          |               |              |                          |                                                                            |
|-------------------------------------|--------|----------|---------------|--------------|--------------------------|----------------------------------------------------------------------------|
| maker-1-augustus-gene-20.22-mRNA-1  | Indica | NA       |               |              | OsR498G0100131400.01.T03 |                                                                            |
| maker-1-augustus-gene-20.4-mRNA-1   | Indica | NA       |               |              | OsR498G0100127900.01.T03 | Putative receptor serine/threonine kinase PR5K                             |
| maker-1-augustus-gene-20.6-mRNA-1   | Indica | NA       |               |              |                          | DUF223 domain-containing protein                                           |
| maker-1-augustus-gene-20.9-mRNA-1   | Indica | NA       | Kinase-TM     |              |                          | Protein kinase domain-containing protein (Fragment)                        |
| maker-1-augustus-gene-21.10-mRNA-1  | Indica | NA       |               | Os01g0139000 | OsR498G0100136300.01.T01 | Reticulon domain-containing protein                                        |
| maker-1-augustus-gene-21.16-mRNA-1  | Indica | NA       |               | Os01g0138600 | OsR498G0100135400.01.T03 | Cysteine proteinase inhibitor                                              |
| maker-1-augustus-gene-21.2-mRNA-1   | Indica | NA       | Kinase-TM     | Os01g0138400 | OsR498G0100134300.01.T01 | Stress-induced receptor-like kinase 2                                      |
| maker-1-augustus-gene-21.23-mRNA-1  | Indica | NA       |               | Os01g0138900 | OsR498G0100136000.01.T03 | Dipeptide epimerase                                                        |
| maker-1-augustus-gene-21.27-mRNA-1  | Indica | NA       |               | Os01g0139200 | OsR498G0100136800.01.T05 | PB1 domain-containing protein (Fragment)                                   |
| maker-1-augustus-gene-21.4-mRNA-1   | Indica | NA       |               | Os01g0138500 | OsR498G0100135100.01.T03 | Coagulation factor VIII                                                    |
| maker-1-augustus-gene-21.7-mRNA-1   | Indica | NA       |               | Os01g0138800 | OsR498G0100135700.01.T01 | Class I glutamine amidotransferase                                         |
| maker-1-augustus-gene-23.0-mRNA-1   | Indica | Indica   |               | Os01g0141600 | OsR498G0100150500.01.T02 | Root UVB sensitive family                                                  |
| maker-1-augustus-gene-23.10-mRNA-1  | Indica | Indica   |               | Os01g0141900 | OsR498G0100151100.01.T03 | Putative proteophosphoglycan                                               |
| maker-1-augustus-gene-23.14-mRNA-1  | Indica | NA       |               | Os01g0142200 | OsR498G0100151500.01.T05 | EKC/KEOPS complex subunit Tprkb like                                       |
| maker-1-augustus-gene-23.18-mRNA-1  | Indica | NA       |               | Os01g0142300 | OsR498G0100151700.01.T01 | Sulfoquinovosyl transferase SQD2                                           |
| maker-1-augustus-gene-23.23-mRNA-1  | Indica | NA       |               | Os01g0142800 | OsR498G0100152900.01.T04 | Peptide transporter                                                        |
| maker-1-augustus-gene-23.31-mRNA-1  | Indica | NA       |               | Os01g0142000 |                          | ATP binding protein                                                        |
| maker-1-augustus-gene-23.33-mRNA-1  | Indica | NA       |               | Os01g0142100 | OsR498G0100151400.01.T01 | Probable zinc metalloprotease EGY2, chloroplastic                          |
| maker-1-augustus-gene-23.41-mRNA-1  | Indica | NA       |               | Os01g0142500 | OsR498G0100152200.01.T02 | Transcription factor DIVARICATA                                            |
| maker-1-augustus-gene-234.41-mRNA-1 | Indica | NA       |               | Os01g0584900 | OsR498G0101416500.01.T01 | WRKY transcription factor                                                  |
| maker-1-augustus-gene-234.43-mRNA-1 | Indica | NA       |               | Os01g0585100 | OsR498G0101417300.01.T03 | Glycerophosphocholine acyltransferase 1                                    |
| maker-1-augustus-gene-234.47-mRNA-1 | Indica | NA       |               |              |                          | DNA damage-binding protein 1                                               |
| maker-1-augustus-gene-234.60-mRNA-1 | Indica | NA       |               | Os01g0585300 | OsR498G0101418800.01.T01 | DNA-directed RNA polymerase, phage-type                                    |
| maker-1-augustus-gene-24.60-mRNA-1  | Indica | NA       |               | Os01g0143100 | OsR498G0100159200.01.T05 | Mitochondrial deoxynucleotide carrier, putative                            |
| maker-1-augustus-gene-24.66-mRNA-1  | Indica | Japonica |               | Os01g0143700 | OsR498G0100161600.01.T01 | Mitochondrial glycoprotein-like                                            |
| maker-1-augustus-gene-24.69-mRNA-1  | Indica | NA       |               | Os01g0143800 | OsR498G0100162200.01.T01 | Mitochondrial glycoprotein family protein                                  |
| maker-1-augustus-gene-26.30-mRNA-1  | Indica | NA       |               | Os01g0148400 | OsR498G0100174700.01.T01 | Brix domain-containing protein                                             |
| maker-1-augustus-gene-26.40-mRNA-1  | Indica | NA       |               | Os01g0147700 | OsR498G0100172800.01.T01 | Factor of DNA methylation 1                                                |
| maker-1-augustus-gene-26.43-mRNA-1  | Indica | NA       |               |              | OsR498G0100173000.01.T01 | DUF547 domain-containing protein                                           |
| maker-1-augustus-gene-26.48-mRNA-1  | Indica | NA       |               | Os01g0147900 | OsR498G0100173200.01.T01 | Triose phosphate isomerase cytosolic isoform                               |
| maker-1-augustus-gene-260.2-mRNA-1  | Indica | NA       |               | Os01g0632700 | OsR498G0101597500.01.T03 |                                                                            |
| maker-1-augustus-gene-260.3-mRNA-1  | Indica | NA       |               |              |                          | ATP-dependent DNA helicase                                                 |
| maker-1-augustus-gene-260.7-mRNA-1  | Indica | NA       |               | Os01g0633100 | OsR498G0101598700.01.T09 | Glucose-1-phosphate adenylyltransferase large subunit, chloroplastic/amylo |
| maker-1-augustus-gene-27.40-mRNA-1  | Indica | Indica   |               | Os01g0150100 | OsR498G0100180100.01.T02 | Geranylgeranyl transferase type I subunit beta                             |
| maker-1-augustus-gene-27.45-mRNA-1  | Indica | NA       |               | Os01g0150200 | OsR498G0100180300.01.T03 | Very-long-chain (3R)-3-hydroxyacyl-CoA dehydratase PASTICCINO 2            |
| maker-1-augustus-gene-27.62-mRNA-1  | Indica | Indica   | Kinase-LRR-TM | Os01g0149700 | OsR498G0100178400.01.T01 | Putative LRR receptor-like serine/threonine-protein kinase                 |
| maker-1-augustus-gene-27.65-mRNA-1  | Indica | NA       |               | Os01g0149800 | OsR498G0100176800.01.T01 | Metallothionein-like protein type 2                                        |
| maker-1-augustus-gene-27.67-mRNA-1  | Indica | NA       |               | Os01g0149900 | OsR498G0100179000.01.T01 |                                                                            |
| maker-1-augustus-gene-27.71-mRNA-1  | Indica | NA       |               | Os01g0150000 | OsR498G0100179800.01.T01 | very-long-chain enoyl-CoA reductase isoform X1                             |
| maker-1-augustus-gene-28.0-mRNA-1   | Indica | NA       |               |              |                          | Very-long-chain (3R)-3-hydroxyacyl-CoA dehydratase                         |
| maker-1-augustus-gene-28.11-mRNA-1  | Indica | NA       |               | Os01g0151200 | OsR498G0100183300.01.T03 | Inner membrane protein translocase involved in respiratory chain assembly  |
| maker-1-augustus-gene-28.25-mRNA-1  | Indica | NA       |               | Os01g0151700 | OsR498G0100184500.01.T02 | Short-chain dehydrogenase TIC 32, chloroplastic                            |
| maker-1-augustus-gene-28.4-mRNA-1   | Indica | NA       |               | Os01g0150800 |                          | Very-long-chain (3R)-3-hydroxyacyl-CoA dehydratase                         |
| maker-1-augustus-gene-29.77-mRNA-1  | Indica | NA       |               |              | OsR498G0100191900.01.T01 | Aspartate--tRNA ligase, chloroplastic/mitochondrial                        |
| maker-1-augustus-gene-29.88-mRNA-1  | Indica | NA       |               | Os01g0154500 | OsR498G0100194300.01.T01 |                                                                            |
| maker-1-augustus-gene-29.90-mRNA-1  | Indica | NA       |               | Os01g0154600 | OsR498G0100194700.01.T02 |                                                                            |
| maker-1-augustus-gene-29.94-mRNA-1  | Indica | NA       |               |              |                          | Tyramine N-feruloyltransferase 4/11-like                                   |
| maker-1-augustus-gene-30.0-mRNA-1   | Indica | Indica   |               | Os01g0155800 | OsR498G0100198300.01.T01 | GPRP                                                                       |
| maker-1-augustus-gene-30.13-mRNA-1  | Indica | NA       |               | Os01g0155400 | OsR498G0100197800.01.T04 |                                                                            |
| maker-1-augustus-gene-30.14-mRNA-1  | Indica | NA       |               |              | OsR498G0100197800.01.T01 | GRIP and coiled-coil domain-containing protein 2 isoform X1                |
| maker-1-augustus-gene-30.2-mRNA-1   | Indica | NA       |               |              | OsR498G0100203300.01.T01 | Glycosyltransferases                                                       |
| maker-1-augustus-gene-30.27-mRNA-1  | Indica | Japonica |               | Os01g0155600 | OsR498G0509618800.01.T01 | Serine/arginine-rich splicing factor RS2Z33 like                           |
| maker-1-augustus-gene-30.29-mRNA-1  | Indica | Indica   |               | Os01g0156000 | OsR498G0100198600.01.T01 | Protein REVEILLE 8 isoform A                                               |
| maker-1-augustus-gene-30.31-mRNA-1  | Indica | NA       |               | Os01g0158400 | OsR498G0100205600.01.T02 | Lectin                                                                     |
| maker-1-augustus-gene-30.4-mRNA-1   | Indica | NA       |               | Os01g0158000 | OsR498G0100204100.01.T01 | Importin subunit alpha                                                     |
| maker-1-augustus-gene-30.8-mRNA-1   | Indica | NA       |               | Os01g0158200 | OsR498G0100204500.01.T01 | Carboxypeptidase                                                           |
| maker-1-augustus-gene-31.44-mRNA-1  | Indica | NA       |               | Os01g0159800 | OsR498G0100210300.01.T02 | Transcription factor bHLH51                                                |
| maker-1-augustus-gene-31.46-mRNA-1  | Indica | NA       |               | Os01g0158900 | OsR498G0100208600.01.T06 | NF-X1-type zinc finger protein NFXL2                                       |
| maker-1-augustus-gene-31.51-mRNA-1  | Indica | NA       |               | Os01g0159000 | OsR498G0100208800.01.T01 | DOG1 domain-containing protein (Fragment)                                  |
| maker-1-augustus-gene-31.53-mRNA-1  | Indica | NA       |               | Os01g0159300 | OsR498G0100209200.01.T02 | E3 ubiquitin-protein ligase MBR1                                           |
| maker-1-augustus-gene-31.59-mRNA-1  | Indica | NA       |               | Os01g0159400 | OsR498G0100209800.01.T01 | Acyl-coenzyme A oxidase 4 peroxisomal                                      |

|                                     |        |        |               |              |                          |                                                                             |
|-------------------------------------|--------|--------|---------------|--------------|--------------------------|-----------------------------------------------------------------------------|
| maker-1-augustus-gene-31.63-mRNA-1  | Indica | NA     |               | Os01g0160100 | OsR498G0100211200.01.T01 | Pyruvate decarboxylase                                                      |
| maker-1-augustus-gene-32.51-mRNA-1  | Indica | NA     |               | Os01g0160800 | OsR498G0100211800.01.T01 | rRNA N-glycosidase                                                          |
| maker-1-augustus-gene-32.52-mRNA-1  | Indica | Indica |               | Os01g0160800 | OsR498G0100212800.01.T01 | rRNA N-glycosidase                                                          |
| maker-1-augustus-gene-32.54-mRNA-1  | Indica | NA     |               |              | OsR498G0204301500.01.T06 | ATP-dependent DNA helicase                                                  |
| maker-1-augustus-gene-33.0-mRNA-1   | Indica | NA     |               |              | OsR498G0100215100.01.T05 | Transcription initiation factor TFIID subunit 15b                           |
| maker-1-augustus-gene-33.11-mRNA-1  | Indica | NA     |               | Os01g0164500 | OsR498G0100215400.01.T01 | DEAD-box ATP-dependent RNA helicase                                         |
| maker-1-augustus-gene-33.16-mRNA-1  | Indica | NA     |               | Os01g0164600 | OsR498G0100215600.01.T01 | PPM-type phosphatase domain-containing protein                              |
| maker-1-augustus-gene-33.22-mRNA-1  | Indica | NA     |               |              | OsR498G0100216000.01.T02 | Tower domain-containing protein (Fragment)                                  |
| maker-1-augustus-gene-33.29-mRNA-1  | Indica | Indica |               | Os01g0164900 | OsR498G0100216000.01.T05 | Tower domain-containing protein                                             |
| maker-1-augustus-gene-33.3-mRNA-1   | Indica | NA     |               |              | OsR498G0100215700.01.T02 | Golgi to ER traffic protein 4                                               |
| maker-1-augustus-gene-33.31-mRNA-1  | Indica | NA     |               | Os01g0165100 | OsR498G0100216400.01.T01 | WD repeat-containing 63                                                     |
| maker-1-augustus-gene-33.33-mRNA-1  | Indica | NA     |               | Os01g0165200 | OsR498G0100216600.01.T03 | DCD (Development and Cell Death) domain protein                             |
| maker-1-augustus-gene-34.0-mRNA-1   | Indica | NA     |               | Os01g0166100 | OsR498G0100219100.01.T01 | Staphylococcal-like nuclease CAN2 isoform A                                 |
| maker-1-augustus-gene-34.13-mRNA-1  | Indica | Indica |               | Os01g0167100 | OsR498G0100221500.01.T06 |                                                                             |
| maker-1-augustus-gene-34.15-mRNA-1  | Indica | NA     |               |              | OsR498G0100223300.01.T02 |                                                                             |
| maker-1-augustus-gene-34.18-mRNA-1  | Indica | NA     |               |              | OsR498G0100218400.01.T06 | HORMA domain-containing protein                                             |
| maker-1-augustus-gene-34.20-mRNA-1  | Indica | NA     |               | Os01g0166800 | OsR498G0100221200.01.T01 | E2F target protein 1                                                        |
| maker-1-augustus-gene-34.24-mRNA-1  | Indica | NA     |               | Os01g0167500 | OsR498G0100222800.01.T01 | TPT domain-containing protein                                               |
| maker-1-augustus-gene-34.3-mRNA-1   | Indica | NA     |               |              | OsR498G0100219300.01.T03 | Staphylococcal-like nuclease CAN2 isoform A                                 |
| maker-1-augustus-gene-34.30-mRNA-1  | Indica | NA     |               |              | OsR498G0100223800.01.T05 |                                                                             |
| maker-1-augustus-gene-348.24-mRNA-1 | Indica | NA     |               | Os01g0805800 | OsR498G0102167600.01.T01 | DNA-directed RNA polymerases II 24 kDa polypeptide                          |
| maker-1-augustus-gene-348.28-mRNA-1 | Indica | Indica |               | Os01g0268800 | OsR498G0102168400.01.T03 | Ubiquitin-associated domain-containing protein 2-like isoform X1            |
| maker-1-augustus-gene-348.31-mRNA-1 | Indica | NA     |               | Os01g0806200 | OsR498G0102168600.01.T01 | F-box family protein-like                                                   |
| maker-1-augustus-gene-348.6-mRNA-1  | Indica | Indica |               | Os01g0805900 | OsR498G0102167900.01.T01 | Tubulin beta chain                                                          |
| maker-1-augustus-gene-349.41-mRNA-1 | Indica | NA     |               |              | OsR498G0102174700.01.T01 | Putative zinc finger, CCHC-type                                             |
| maker-1-augustus-gene-349.42-mRNA-1 | Indica | NA     |               |              | OsR498G0102176300.01.T02 |                                                                             |
| maker-1-augustus-gene-349.44-mRNA-1 | Indica | NA     |               | Os01g0807900 | OsR498G0102176900.01.T03 | Pyrimidine 2 isoform 1                                                      |
| maker-1-augustus-gene-349.48-mRNA-1 | Indica | Indica |               | Os01g0279900 | OsR498G0102177400.01.T02 | Transcription factor TGAL1                                                  |
| maker-1-augustus-gene-35.0-mRNA-1   | Indica | NA     |               | Os01g0168400 | OsR498G0100226300.01.T01 | RING finger and transmembrane domain-containing protein 2                   |
| maker-1-augustus-gene-35.13-mRNA-1  | Indica | NA     |               |              | OsR498G0100229500.01.T01 | Transcription factor MYB3                                                   |
| maker-1-augustus-gene-35.15-mRNA-1  | Indica | NA     |               | Os01g0167800 |                          | PMD domain-containing protein (Fragment)                                    |
| maker-1-augustus-gene-35.18-mRNA-1  | Indica | NA     |               | Os01g0167900 | OsR498G0100224600.01.T02 | NAB domain-containing protein                                               |
| maker-1-augustus-gene-35.20-mRNA-1  | Indica | NA     |               | Os01g0168200 | OsR498G0100225200.01.T02 | Thioredoxin H-type like                                                     |
| maker-1-augustus-gene-35.23-mRNA-1  | Indica | NA     |               | Os01g0168300 | OsR498G0100225600.01.T01 | Import inner membrane translocase subunit                                   |
| maker-1-augustus-gene-35.25-mRNA-1  | Indica | NA     |               | Os01g0168800 | OsR498G0100227000.01.T02 | AB hydrolase-1 domain-containing protein                                    |
| maker-1-augustus-gene-35.28-mRNA-1  | Indica | NA     |               |              | OsR498G0100227600.01.T01 | Transcription factor TT2                                                    |
| maker-1-augustus-gene-35.6-mRNA-1   | Indica | NA     |               | Os01g0168500 | OsR498G0100226500.01.T03 | Homolog of yeast autophagy 18C                                              |
| maker-1-augustus-gene-35.8-mRNA-1   | Indica | Indica |               | Os01g0168600 | OsR498G0100226700.01.T02 | O-fucosyltransferase family protein (Fragment)                              |
| maker-1-augustus-gene-350.22-mRNA-1 | Indica | NA     | LRR-TM        |              | OsR498G0102182300.01.T02 | BRASSINOSTEROID INSENSITIVE 1-associated receptor kinase 1                  |
| maker-1-augustus-gene-350.26-mRNA-1 | Indica | NA     |               |              | OsR498G0102183300.01.T01 |                                                                             |
| maker-1-augustus-gene-350.28-mRNA-1 | Indica | NA     |               |              | OsR498G0102183700.01.T01 | C2H2-type domain-containing protein                                         |
| maker-1-augustus-gene-351.12-mRNA-1 | Indica | NA     |               | Os01g0810000 | OsR498G0102186800.01.T02 | U3 small nucleolar RNA-associated protein 11                                |
| maker-1-augustus-gene-351.17-mRNA-1 | Indica | NA     |               | Os01g0810100 | OsR498G0102187200.01.T01 | RNase III domain-containing protein (Fragment)                              |
| maker-1-augustus-gene-351.2-mRNA-1  | Indica | Indica |               | Os01g0809900 | OsR498G0102186500.01.T01 | DAO domain-containing protein (Fragment)                                    |
| maker-1-augustus-gene-351.20-mRNA-1 | Indica | Indica | Kinase-LRR-TM | Os01g0810533 | OsR498G0102188400.01.T04 | Receptor-like protein kinase                                                |
| maker-1-augustus-gene-351.26-mRNA-1 | Indica | NA     | Kinase-TM     | Os01g0810600 |                          | Putative light repressible receptor protein kinase                          |
| maker-1-augustus-gene-351.6-mRNA-1  | Indica | NA     |               | Os01g0810200 | OsR498G0102187300.01.T02 | RmlC-like jelly roll                                                        |
| maker-1-augustus-gene-351.8-mRNA-1  | Indica | NA     |               | Os01g0810300 | OsR498G0102187500.01.T02 | Calmodulin                                                                  |
| maker-1-augustus-gene-352.35-mRNA-1 | Indica | NA     |               | Os01g0811100 | OsR498G0102192900.01.T01 | Proteasome endopeptidase complex                                            |
| maker-1-augustus-gene-352.41-mRNA-1 | Indica | NA     |               | Os01g0812000 | OsR498G0102195500.01.T02 | Transcription factor GAMYB                                                  |
| maker-1-augustus-gene-352.45-mRNA-1 | Indica | NA     |               | Os01g0812050 | OsR498G0102195900.01.T01 | Ulp1 protease family C-terminal catalytic domain containing protein express |
| maker-1-augustus-gene-352.53-mRNA-1 | Indica | NA     | Kinase-LRR-TM |              | OsR498G0102191000.01.T01 | Putative light repressible receptor protein kinase                          |
| maker-1-augustus-gene-352.57-mRNA-1 | Indica | NA     | Kinase-LRR-TM | Os01g0810900 | OsR498G0102192000.01.T04 | Putative light repressible receptor protein kinase                          |
| maker-1-augustus-gene-352.63-mRNA-1 | Indica | NA     |               | Os01g0811400 | OsR498G0102193800.01.T02 | Exostosin domain-containing protein                                         |
| maker-1-augustus-gene-353.0-mRNA-1  | Indica | NA     |               |              | OsR498G0102200100.01.T02 | Ethylene-responsive transcription factor WRI1                               |
| maker-1-augustus-gene-353.15-mRNA-1 | Indica | NA     |               | Os01g0814000 | OsR498G0102201900.01.T01 | NUFIP1 domain-containing protein (Fragment)                                 |
| maker-1-augustus-gene-353.22-mRNA-1 | Indica | NA     |               | Os01g0812600 | OsR498G0102198200.01.T01 |                                                                             |
| maker-1-augustus-gene-353.26-mRNA-1 | Indica | Indica |               | Os03g0322500 | OsR498G0102199200.01.T02 | 14 kDa zinc-binding protein, putative, expressed                            |
| maker-1-augustus-gene-353.31-mRNA-1 | Indica | NA     |               | Os01g0813100 | OsR498G0102199400.01.T02 | ABSCISIC ACID-INSENSITIVE 5-like protein 2                                  |
| maker-1-augustus-gene-353.35-mRNA-1 | Indica | NA     |               | Os01g0813500 | OsR498G0102200600.01.T01 | GLUE N-terminal domain-containing protein                                   |
| maker-1-augustus-gene-353.40-mRNA-1 | Indica | Indica |               | Os01g0930800 | OsR498G0102200800.01.T01 | Non-cyanogenic beta-glucosidase                                             |

|                                     |        |          |               |              |                          |                                                                         |
|-------------------------------------|--------|----------|---------------|--------------|--------------------------|-------------------------------------------------------------------------|
| maker-1-augustus-gene-353.41-mRNA-1 | Indica | Indica   |               | Os01g0930800 | OsR498G0102200800.01.T01 | Beta-glucosidase 2                                                      |
| maker-1-augustus-gene-353.44-mRNA-1 | Indica | Indica   |               | Os01g0930800 | OsR498G0102201400.01.T03 | 4-hydroxy-7-methoxy-3-oxo-3,4-dihydro-2H-1,4-benzoxazin-2-yl glucoside  |
| maker-1-augustus-gene-353.8-mRNA-1  | Indica | NA       |               | Os01g0813900 | OsR498G0102201700.01.T06 | probable ADP-ribosylation factor GTPase-activating protein AGD14        |
| maker-1-augustus-gene-354.0-mRNA-1  | Indica | NA       |               | Os01g0814150 |                          |                                                                         |
| maker-1-augustus-gene-354.10-mRNA-1 | Indica | Indica   |               | Os05g0489000 | OsR498G0102202600.01.T02 | iPPc domain-containing protein (Fragment)                               |
| maker-1-augustus-gene-354.14-mRNA-1 | Indica | NA       |               | Os01g0814400 | OsR498G0102203000.01.T01 | Dentin sialophosphoprotein                                              |
| maker-1-augustus-gene-354.16-mRNA-1 | Indica | Indica   |               | Os01g0814700 | OsR498G0102203400.01.T05 | F-box protein SKIP24                                                    |
| maker-1-augustus-gene-354.2-mRNA-1  | Indica | NA       |               | Os01g0814300 | OsR498G0102202700.01.T01 | Pentatricopeptide repeat-containing protein chloroplastic/mitochondrial |
| maker-1-augustus-gene-354.20-mRNA-1 | Indica | NA       |               | Os01g0814800 | OsR498G0102203600.01.T01 | Cysteine synthase                                                       |
| maker-1-augustus-gene-354.23-mRNA-1 | Indica | NA       |               | Os01g0814900 | OsR498G0102204200.01.T01 | NADH-cytochrome b5 reductase                                            |
| maker-1-augustus-gene-354.27-mRNA-1 | Indica | Japonica |               | Os01g0815400 | OsR498G0511077900.01.T01 | Laminin subunit gamma-3                                                 |
| maker-1-augustus-gene-354.30-mRNA-1 | Indica | NA       |               | Os01g0816100 | OsR498G0102207800.01.T02 | Stress-induced transcription factor NAC1                                |
| maker-1-augustus-gene-354.32-mRNA-1 | Indica | NA       |               | Os01g0816400 | OsR498G0102209000.01.T04 | VHS domain-containing protein                                           |
| maker-1-augustus-gene-354.4-mRNA-1  | Indica | NA       |               | Os01g0815700 | OsR498G0102206700.01.T01 | Zinc finger protein VAR3 chloroplastic                                  |
| maker-1-augustus-gene-354.8-mRNA-1  | Indica | NA       |               | Os01g0815800 | OsR498G0102206900.01.T03 | TRASH domain-containing protein                                         |
| maker-1-augustus-gene-355.0-mRNA-1  | Indica | NA       | Kinase-LRR-TM |              | OsR498G0102210700.01.T02 | Leucine-rich repeat protein kinase family protein                       |
| maker-1-augustus-gene-355.13-mRNA-1 | Indica | NA       |               | Os01g0817700 | OsR498G0102213900.01.T04 | 2,3-bisphosphoglycerate-independent phosphoglycerate mutase             |
| maker-1-augustus-gene-355.18-mRNA-1 | Indica | Indica   |               | Os01g0816400 | OsR498G0102210200.01.T01 | TOG domain-containing protein                                           |
| maker-1-augustus-gene-355.21-mRNA-1 | Indica | NA       |               | Os01g0817000 | OsR498G0102211400.01.T01 | Calcium uniporter protein (Fragment)                                    |
| maker-1-augustus-gene-355.24-mRNA-1 | Indica | NA       |               | Os01g0817100 | OsR498G0102211800.01.T05 | TLC domain-containing protein (Fragment)                                |
| maker-1-augustus-gene-355.26-mRNA-1 | Indica | NA       |               | Os01g0817800 | OsR498G0102214200.01.T01 | Transducin/WD40 repeat-like superfamily protein isoform 1               |
| maker-1-augustus-gene-355.9-mRNA-1  | Indica | Indica   |               | Os01g0817400 | OsR498G0102212100.01.T01 | Cation/H(+) antiporter 15                                               |
| maker-1-augustus-gene-356.0-mRNA-1  | Indica | NA       |               | Os01g0818000 | OsR498G0102215500.01.T06 | PIN-formed protein14                                                    |
| maker-1-augustus-gene-356.11-mRNA-1 | Indica | NA       |               | Os01g0818400 | OsR498G0102216700.01.T02 | Homeobox domain-containing protein (Fragment)                           |
| maker-1-augustus-gene-356.13-mRNA-1 | Indica | NA       |               | Os01g0819000 | OsR498G0102218300.01.T01 | Proline-rich family protein                                             |
| maker-1-augustus-gene-356.16-mRNA-1 | Indica | Indica   | Kinase-LRR-TM | Os05g0480400 | OsR498G0102218900.01.T03 | Inactive receptor kinase                                                |
| maker-1-augustus-gene-356.23-mRNA-1 | Indica | NA       | Kinase-LRR-TM |              | OsR498G0102217000.01.T01 | Non-specific serine/threonine protein kinase (Fragment)                 |
| maker-1-augustus-gene-356.25-mRNA-1 | Indica | Indica   |               | Os09g0538800 | OsR498G0102219200.01.T01 | Calcium lipid binding protein-like                                      |
| maker-1-augustus-gene-356.37-mRNA-1 | Indica | Indica   |               | Os09g0538800 | OsR498G0102219400.01.T03 | Calcium lipid binding protein-like                                      |
| maker-1-augustus-gene-356.4-mRNA-1  | Indica | NA       |               |              | OsR498G0102215900.01.T01 | C2 calcium-dependent membrane targeting                                 |
| maker-1-augustus-gene-356.7-mRNA-1  | Indica | NA       |               | Os01g0818300 | OsR498G0102216100.01.T01 | KH domain-containing protein SPIN1                                      |
| maker-1-augustus-gene-357.0-mRNA-1  | Indica | NA       |               | Os01g0819400 | OsR498G0102220900.01.T02 | Ubiquitin-conjugating enzyme E2                                         |
| maker-1-augustus-gene-357.1-mRNA-1  | Indica | NA       |               | Os01g0819400 | OsR498G0102221700.01.T02 | UBC core domain-containing protein (Fragment)                           |
| maker-1-augustus-gene-357.10-mRNA-1 | Indica | NA       |               |              | OsR498G0102224700.01.T01 | WRKY transcription factor                                               |
| maker-1-augustus-gene-357.12-mRNA-1 | Indica | NA       |               |              | OsR498G0102225700.01.T01 | WRKY transcription factor 18                                            |
| maker-1-augustus-gene-357.14-mRNA-1 | Indica | NA       |               |              | OsR498G0102226300.01.T01 | WRKY transcription factor 20                                            |
| maker-1-augustus-gene-357.16-mRNA-1 | Indica | NA       |               | Os01g0819900 | OsR498G0102222600.01.T01 | Inactive serine/threonine-protein kinase scy1                           |
| maker-1-augustus-gene-357.20-mRNA-1 | Indica | Japonica |               | Os01g0820000 | OsR498G0510486800.01.T01 | Trans-cinnamate 4-monooxygenase                                         |
| maker-1-augustus-gene-357.6-mRNA-1  | Indica | NA       |               | Os01g0819400 | OsR498G0102220900.01.T02 | UBC core domain-containing protein (Fragment)                           |
| maker-1-augustus-gene-358.0-mRNA-1  | Indica | NA       |               | Os01g0821600 | OsR498G0102228300.01.T01 | WRKY transcription factor 1                                             |
| maker-1-augustus-gene-358.13-mRNA-1 | Indica | NA       |               | Os01g0821800 | OsR498G0102228800.01.T01 | tRNA-binding domain-containing protein (Fragment)                       |
| maker-1-augustus-gene-358.18-mRNA-1 | Indica | Indica   | Kinase-LRR-TM | Os01g0821900 | OsR498G0102230200.01.T01 | Serine/threonine kinase                                                 |
| maker-1-augustus-gene-358.2-mRNA-1  | Indica | NA       |               |              |                          | Glutathione S-transferase T2-like                                       |
| maker-1-augustus-gene-358.20-mRNA-1 | Indica | NA       | Kinase-TM     | Os01g0822200 | OsR498G0102231000.01.T04 | Serine/threonine-protein kinase NAK                                     |
| maker-1-augustus-gene-358.4-mRNA-1  | Indica | NA       |               | Os01g0821300 | OsR498G0102227200.01.T01 | WRKY55-superfamily of TFs having WRKY and zinc finger domains           |
| maker-1-augustus-gene-358.8-mRNA-1  | Indica | NA       |               |              | OsR498G0102228600.01.T02 | Protein FATTY ACID EXPORT 3 chloroplastic                               |
| maker-1-augustus-gene-359.42-mRNA-1 | Indica | NA       |               | Os01g0823100 | OsR498G0102236100.01.T01 | Expansin                                                                |
| maker-1-augustus-gene-359.44-mRNA-1 | Indica | NA       |               |              |                          | TPT domain-containing protein                                           |
| maker-1-augustus-gene-359.49-mRNA-1 | Indica | NA       |               | Os01g0823300 | OsR498G0102236500.01.T01 | 40S ribosomal protein S26                                               |
| maker-1-augustus-gene-359.51-mRNA-1 | Indica | NA       |               | Os01g0823400 | OsR498G0102236900.01.T02 | 2-oxoglutarate (2OG) and Fe(II)-dependent oxygenase superfamily protein |
| maker-1-augustus-gene-359.54-mRNA-1 | Indica | NA       |               | Os01g0823600 | OsR498G0102238700.01.T01 | GATA-N domain-containing protein                                        |
| maker-1-augustus-gene-359.56-mRNA-1 | Indica | NA       |               |              | OsR498G0102239900.01.T01 |                                                                         |
| maker-1-augustus-gene-36.36-mRNA-1  | Indica | Indica   | Kinase-LRR-TM | Os01g0170300 | OsR498G0100236300.01.T02 | Mitogen-activated protein kinase kinase kinase                          |
| maker-1-augustus-gene-36.46-mRNA-1  | Indica | NA       |               | Os01g0169500 | OsR498G0100232800.01.T02 |                                                                         |
| maker-1-augustus-gene-36.55-mRNA-1  | Indica | NA       |               |              | OsR498G0100235000.01.T02 | Galactinol-sucrose galactosyltransferase                                |
| maker-1-augustus-gene-360.10-mRNA-1 | Indica | NA       |               |              | OsR498G0102242400.01.T01 |                                                                         |
| maker-1-augustus-gene-360.12-mRNA-1 | Indica | NA       |               | Os01g0825500 | OsR498G0102245400.01.T03 | Nodulin-like domain-containing protein (Fragment)                       |
| maker-1-augustus-gene-360.14-mRNA-1 | Indica | NA       |               | Os01g0825700 | OsR498G0102246600.01.T01 | Target of Myb protein 1-like                                            |
| maker-1-augustus-gene-360.20-mRNA-1 | Indica | Indica   |               | Os01g0825800 | OsR498G0102247400.01.T01 | Amino acid-polyamine transporter                                        |
| maker-1-augustus-gene-360.21-mRNA-1 | Indica | NA       |               | Os01g0825800 | OsR498G0102247400.01.T02 | Amino acid-polyamine transporter                                        |
| maker-1-augustus-gene-360.3-mRNA-1  | Indica | NA       | Kinase-TM     | Os01g0824600 | OsR498G0102242100.01.T06 | Non-specific serine/threonine protein kinase                            |

|                                     |        |        |  |              |                          |                                                                     |
|-------------------------------------|--------|--------|--|--------------|--------------------------|---------------------------------------------------------------------|
| maker-1-augustus-gene-360.4-mRNA-1  | Indica | NA     |  | Os01g0824800 | OsR498G0102242700.01.T02 |                                                                     |
| maker-1-augustus-gene-360.6-mRNA-1  | Indica | NA     |  | Os01g0825000 | OsR498G0102243500.01.T01 | LOB domain-containing protein 15                                    |
| maker-1-augustus-gene-360.8-mRNA-1  | Indica | NA     |  | Os01g0826000 | OsR498G0102247900.01.T01 | HMA domain-containing protein                                       |
| maker-1-augustus-gene-361.38-mRNA-1 | Indica | NA     |  | Os01g0826400 | OsR498G0102249300.01.T01 | Transcription factor WRKY33                                         |
| maker-1-augustus-gene-361.40-mRNA-1 | Indica | NA     |  |              | OsR498G0102249900.01.T01 |                                                                     |
| maker-1-augustus-gene-361.43-mRNA-1 | Indica | NA     |  | Os01g0827300 | OsR498G0102253300.01.T01 | Laccase                                                             |
| maker-1-augustus-gene-361.45-mRNA-1 | Indica | NA     |  |              | OsR498G0102255300.01.T01 | Cinnamoyl-CoA reductase                                             |
| maker-1-augustus-gene-361.48-mRNA-1 | Indica | NA     |  |              | OsR498G0102255500.01.T01 | Gamma interferon inducible lysosomal thiol reductase GILT           |
| maker-1-augustus-gene-361.51-mRNA-1 | Indica | NA     |  | Os01g0828300 | OsR498G0102255700.01.T04 | Methyltransferase                                                   |
| maker-1-augustus-gene-361.57-mRNA-1 | Indica | NA     |  |              |                          |                                                                     |
| maker-1-augustus-gene-361.60-mRNA-1 | Indica | NA     |  | Os01g0826900 | OsR498G0102252200.01.T01 | Protein RETICULATA-RELATED 6 chloroplastic                          |
| maker-1-augustus-gene-361.64-mRNA-1 | Indica | NA     |  | Os01g0827200 | OsR498G0102252800.01.T01 | PX domain-containing protein (Fragment)                             |
| maker-1-augustus-gene-361.68-mRNA-1 | Indica | Indica |  | Os01g0827700 | OsR498G0102254000.01.T01 | GDSL esterase/lipase                                                |
| maker-1-augustus-gene-362.37-mRNA-1 | Indica | NA     |  |              | OsR498G0611768000.01.T01 |                                                                     |
| maker-1-augustus-gene-362.39-mRNA-1 | Indica | NA     |  | Os01g0829000 | OsR498G0102257700.01.T02 | Thioredoxin-like fold domain-containing protein MRL7, chloroplastic |
| maker-1-augustus-gene-362.48-mRNA-1 | Indica | NA     |  | Os01g0830700 | OsR498G0102265100.01.T04 | Protein trichome birefringence-like                                 |
| maker-1-augustus-gene-362.53-mRNA-1 | Indica | NA     |  | Os01g0829100 | OsR498G0102258000.01.T01 | Cyclin dependent kinase inhibitor 2D                                |
| maker-1-augustus-gene-362.55-mRNA-1 | Indica | NA     |  | Os01g0829300 |                          |                                                                     |
| maker-1-augustus-gene-362.57-mRNA-1 | Indica | NA     |  | Os01g0829900 | OsR498G0102261000.01.T01 | Probable metal-nicotianamine transporter YSL18                      |
| maker-1-augustus-gene-362.59-mRNA-1 | Indica | NA     |  | Os01g0830000 | OsR498G0102261200.01.T01 | UPF0051 protein ABCI8, chloroplastic                                |
| maker-1-augustus-gene-362.61-mRNA-1 | Indica | NA     |  | Os01g0830500 | OsR498G0102262400.01.T01 | Fe2OG dioxygenase domain-containing protein (Fragment)              |
| maker-1-augustus-gene-362.14-mRNA-1 | Indica | NA     |  | Os01g0832600 | OsR498G0102271500.01.T02 | Jasmonate-regulated gene 21                                         |
| maker-1-augustus-gene-363.16-mRNA-1 | Indica | Indica |  | Os01g0831900 | OsR498G0102268800.01.T01 | Ammonium transporter                                                |
| maker-1-augustus-gene-363.18-mRNA-1 | Indica | NA     |  | Os01g0831900 | OsR498G0102269200.01.T01 | Ammonium transporter                                                |
| maker-1-augustus-gene-363.20-mRNA-1 | Indica | NA     |  |              | OsR498G0102269400.01.T02 | Phytol kinase                                                       |
| maker-1-augustus-gene-363.25-mRNA-1 | Indica | Indica |  | Os05g0467300 | OsR498G0102270000.01.T01 |                                                                     |
| maker-1-augustus-gene-363.6-mRNA-1  | Indica | NA     |  | Os01g0832100 | OsR498G0102269700.01.T01 | Gdsl esteraselipase                                                 |
| maker-1-augustus-gene-363.8-mRNA-1  | Indica | Indica |  | Os05g0467000 | OsR498G0102270900.01.T05 | Calcium-dependent protein kinase                                    |
| maker-1-augustus-gene-364.11-mRNA-1 | Indica | NA     |  | Os01g0834200 | OsR498G0102276700.01.T05 | V-type proton ATPase subunit a                                      |
| maker-1-augustus-gene-364.18-mRNA-1 | Indica | NA     |  | Os01g0833100 | OsR498G0102273800.01.T01 | FCP1 homology domain-containing protein                             |
| maker-1-augustus-gene-364.22-mRNA-1 | Indica | NA     |  | Os01g0833500 | OsR498G0102274800.01.T01 | Carboxypeptidase                                                    |
| maker-1-augustus-gene-364.25-mRNA-1 | Indica | NA     |  | Os01g0833600 | OsR498G0102275000.01.T01 | ATP-dependent Clp protease adapter protein ClpS                     |
| maker-1-augustus-gene-364.27-mRNA-1 | Indica | NA     |  | Os01g0833700 | OsR498G0102275200.01.T03 | Coatomer subunit delta                                              |
| maker-1-augustus-gene-364.32-mRNA-1 | Indica | NA     |  | Os01g0833800 | OsR498G0102275400.01.T05 | IQ-domain 3                                                         |
| maker-1-augustus-gene-364.35-mRNA-1 | Indica | Indica |  | Os01g0834100 | OsR498G0102275800.01.T02 | Interactor of constitutive active ROPs 3                            |
| maker-1-augustus-gene-364.38-mRNA-1 | Indica | NA     |  |              | OsR498G0102275800.01.T05 |                                                                     |
| maker-1-augustus-gene-364.6-mRNA-1  | Indica | NA     |  | Os01g0833200 | OsR498G0102274100.01.T02 | Putative rmlC-like cupin domain-containing protein                  |
| maker-1-augustus-gene-364.9-mRNA-1  | Indica | NA     |  | Os01g0833400 | OsR498G0102274300.01.T02 | Chlorophyll A-B binding family protein                              |
| maker-1-augustus-gene-365.0-mRNA-1  | Indica | NA     |  | Os01g0834700 | OsR498G0102279700.01.T01 | Zinc finger CCH domain-containing protein 11                        |
| maker-1-augustus-gene-365.11-mRNA-1 | Indica | NA     |  | Os01g0834500 | OsR498G0102279400.01.T04 | 40S ribosomal protein S23                                           |
| maker-1-augustus-gene-365.13-mRNA-1 | Indica | NA     |  | Os01g0834601 | OsR498G0102279400.01.T04 | 40S ribosomal protein S23                                           |
| maker-1-augustus-gene-365.15-mRNA-1 | Indica | Indica |  | Os05g0465100 | OsR498G0102281200.01.T01 | Rab-GAP TBC domain-containing protein                               |
| maker-1-augustus-gene-365.20-mRNA-1 | Indica | NA     |  | Os01g0835700 | OsR498G0102285600.01.T01 | CCT domain                                                          |
| maker-1-augustus-gene-365.22-mRNA-1 | Indica | NA     |  | Os01g0835800 | OsR498G0102286000.01.T02 | NAB domain-containing protein                                       |
| maker-1-augustus-gene-365.3-mRNA-1  | Indica | NA     |  | Os01g0835500 | OsR498G0102283700.01.T01 | Respiratory burst oxidase like protein H                            |
| maker-1-augustus-gene-365.9-mRNA-1  | Indica | Indica |  | Os05g0463800 | OsR498G0102279000.01.T01 | Nuclear transcription factor Y subunit B                            |
| maker-1-augustus-gene-366.40-mRNA-1 | Indica | Indica |  | Os01g0836400 | OsR498G0102287100.01.T04 | PCI domain-containing protein                                       |
| maker-1-augustus-gene-366.45-mRNA-1 | Indica | NA     |  |              | OsR498G0102290700.01.T01 | caffeoylshikimate esterase-like                                     |
| maker-1-augustus-gene-366.49-mRNA-1 | Indica | NA     |  | Os01g0837300 | OsR498G0102291100.01.T01 | UDP-glucuronic acid decarboxylase                                   |
| maker-1-augustus-gene-366.53-mRNA-1 | Indica | NA     |  | Os01g0837500 | OsR498G0102291300.01.T04 | DNA helicase                                                        |
| maker-1-augustus-gene-366.59-mRNA-1 | Indica | Indica |  | Os01g0837600 | OsR498G0102291500.01.T01 | Plant-specific domain TIGR01589 family protein expressed            |
| maker-1-augustus-gene-366.63-mRNA-1 | Indica | Indica |  | Os01g0837000 | OsR498G0102290000.01.T02 | Ankyrin repeat-containing protein NPR4                              |
| maker-1-augustus-gene-366.73-mRNA-1 | Indica | NA     |  | Os01g0837900 | OsR498G0102292600.01.T02 | Serinethreonine-protein kinase afc1                                 |
| maker-1-augustus-gene-367.0-mRNA-1  | Indica | NA     |  |              | OsR498G0102293500.01.T02 | Transcription repressor OFP4                                        |
| maker-1-augustus-gene-367.1-mRNA-1  | Indica | NA     |  | Os01g0838100 | OsR498G0102294100.01.T02 | Replication protein A 70 kDa DNA-binding subunit B-like             |
| maker-1-augustus-gene-367.14-mRNA-1 | Indica | NA     |  | Os04g0132900 |                          |                                                                     |
| maker-1-augustus-gene-367.16-mRNA-1 | Indica | NA     |  | Os01g0838800 | OsR498G0102297100.01.T01 | Coatomer subunit zeta                                               |
| maker-1-augustus-gene-367.19-mRNA-1 | Indica | NA     |  |              | OsR498G0204529200.01.T01 | Putative non-LTR retroelement reverse transcriptase                 |
| maker-1-augustus-gene-367.20-mRNA-1 | Indica | NA     |  |              | OsR498G0102299300.01.T04 | RplQ                                                                |
| maker-1-augustus-gene-367.26-mRNA-1 | Indica | NA     |  | Os01g0838900 |                          | DDE Tnp4 domain-containing protein (Fragment)                       |
| maker-1-augustus-gene-367.28-mRNA-1 | Indica | NA     |  | Os01g0839200 | OsR498G0102299000.01.T01 | UPSTREAM OF FLC protein (DUF966)                                    |

|                                     |        |        |           |              |                          |                                                                               |
|-------------------------------------|--------|--------|-----------|--------------|--------------------------|-------------------------------------------------------------------------------|
| maker-1-augustus-gene-367.30-mRNA-1 | Indica | NA     |           | Os01g0839700 | OsR498G0102300200.01.T01 | Ubiquitin-conjugating enzyme                                                  |
| maker-1-augustus-gene-368.0-mRNA-1  | Indica | NA     |           | Os01g0840100 | OsR498G0102302100.01.T02 | Heat shock cognate 70 kDa protein 2                                           |
| maker-1-augustus-gene-368.7-mRNA-1  | Indica | NA     |           | Os01g0840300 | OsR498G0102304200.01.T01 | Homeobox domain                                                               |
| maker-1-augustus-gene-37.33-mRNA-1  | Indica | NA     |           | Os01g0172200 | OsR498G0100242400.01.T02 | DEAD-box ATP-dependent RNA helicase 14                                        |
| maker-1-augustus-gene-37.36-mRNA-1  | Indica | NA     |           | Os01g0172300 | OsR498G0100242600.01.T02 | DUF4050 domain-containing protein (Fragment)                                  |
| maker-1-augustus-gene-37.39-mRNA-1  | Indica | NA     |           | Os01g0172400 | OsR498G0100242800.01.T02 | Phospholipase D                                                               |
| maker-1-augustus-gene-37.6-mRNA-1   | Indica | NA     |           |              | OsR498G0100242900.01.T04 | Peroxidase                                                                    |
| maker-1-augustus-gene-383.1-mRNA-1  | Indica | NA     |           | Os01g0869200 | OsR498G0102410700.01.T01 | Magnesium transporter                                                         |
| maker-1-augustus-gene-383.32-mRNA-1 | Indica | Indica |           | Os07g0232900 | OsR498G0102410400.01.T01 | Cadmium/zinc-transporting ATPase HMA2                                         |
| maker-1-augustus-gene-39.47-mRNA-1  | Indica | NA     |           | Os01g0176500 | OsR498G0100254600.01.T01 | Myosin-10 like                                                                |
| maker-1-augustus-gene-39.9-mRNA-1   | Indica | Indica |           | Os05g0178000 | OsR498G0100254300.01.T01 | NPH3 domain-containing protein (Fragment)                                     |
| maker-1-augustus-gene-422.62-mRNA-1 | Indica | Indica |           | Os03g0855700 | OsR498G0102324800.01.T02 | DUF223 domain-containing protein                                              |
| maker-1-augustus-gene-422.66-mRNA-1 | Indica | Indica |           | Os01g0630700 | OsR498G1221780100.01.T02 | Putative transcription factor DP, helitron helicase-like domain-containing pr |
| maker-1-augustus-gene-425.0-mRNA-1  | Indica | NA     |           | Os01g0850800 | OsR498G0102340700.01.T01 | Laccase                                                                       |
| maker-1-augustus-gene-44.5-mRNA-1   | Indica | NA     |           |              | OsR498G0100281900.01.T04 | Spatacsin                                                                     |
| maker-1-augustus-gene-445.9-mRNA-1  | Indica | Indica | Kinase-TM | Os01g0890600 | OsR498G0102491100.01.T02 | Receptor-like serine/threonine-protein kinase                                 |
| maker-1-augustus-gene-448.23-mRNA-1 | Indica | NA     | Kinase    |              | OsR498G0102507600.01.T01 | Cell division control protein 2                                               |
| maker-1-augustus-gene-45.72-mRNA-1  | Indica | NA     |           | Os01g0183700 |                          | Histone-lysine N-methyltransferase ATX1                                       |
| maker-1-augustus-gene-46.38-mRNA-1  | Indica | NA     |           |              | OsR498G0100288300.01.T02 | Cysteine dioxygenase                                                          |
| maker-1-augustus-gene-47.22-mRNA-1  | Indica | NA     |           | Os01g0187000 | OsR498G0100294100.01.T01 | Skp1 domain-containing protein                                                |
| maker-1-augustus-gene-47.42-mRNA-1  | Indica | NA     | Kinase-TM | Os01g0186700 | OsR498G0100292200.01.T03 | ACG (cAMP-dependent cGMP-dependent and protein kinase C) kinase family        |
| maker-1-augustus-gene-47.39-mRNA-1  | Indica | NA     |           | Os01g0905200 | OsR498G0102535900.01.T01 | Transposon protein, putative, unclassified                                    |
| maker-1-augustus-gene-470.41-mRNA-1 | Indica | Indica |           | Os01g0905300 | OsR498G0102536100.01.T01 | Exocyst complex component EXO70A1                                             |
| maker-1-augustus-gene-470.47-mRNA-1 | Indica | NA     |           | Os01g0905400 | OsR498G0102536400.01.T01 | B3 domain-containing protein                                                  |
| maker-1-augustus-gene-470.50-mRNA-1 | Indica | NA     |           |              | OsR498G0102539200.01.T02 | Ceramide glucosyltransferase                                                  |
| maker-1-augustus-gene-470.58-mRNA-1 | Indica | NA     |           |              | OsR498G0102540800.01.T02 | Vacuolar protein sorting-associated protein 53 A like                         |
| maker-1-augustus-gene-471.10-mRNA-1 | Indica | NA     |           | Os01g0908200 | OsR498G0102547300.01.T01 | BTB/POZ and TAZ domain-containing protein 1                                   |
| maker-1-augustus-gene-471.13-mRNA-1 | Indica | NA     |           |              | OsR498G0102548500.01.T02 | Proline transporter 2                                                         |
| maker-1-augustus-gene-471.14-mRNA-1 | Indica | NA     |           |              | OsR498G0102548500.01.T01 | Proline transporter 1                                                         |
| maker-1-augustus-gene-471.2-mRNA-1  | Indica | NA     |           | Os01g0907300 | OsR498G0102542500.01.T02 | GPI transamidase component PIG-S                                              |
| maker-1-augustus-gene-471.27-mRNA-1 | Indica | NA     |           |              |                          | Ypt/Rab-GAP domain of gyp1p superfamily protein isoform 2                     |
| maker-1-augustus-gene-471.32-mRNA-1 | Indica | Indica |           | Os01g0908500 | OsR498G0102547800.01.T01 | Magnesium transporter                                                         |
| maker-1-augustus-gene-471.37-mRNA-1 | Indica | Indica |           | Os01g0908700 | OsR498G0102548800.01.T01 | E3 ubiquitin-protein ligase RGLG2                                             |
| maker-1-augustus-gene-471.6-mRNA-1  | Indica | NA     |           | Os01g0907400 |                          | Lysine-specific demethylase                                                   |
| maker-1-augustus-gene-471.8-mRNA-1  | Indica | NA     |           | Os01g0907900 | OsR498G0102544500.01.T01 | RRM domain-containing protein (Fragment)                                      |
| maker-1-augustus-gene-472.0-mRNA-1  | Indica | NA     |           |              | OsR498G0102550900.01.T02 | NPL domain-containing protein                                                 |
| maker-1-augustus-gene-472.11-mRNA-1 | Indica | NA     |           | Os01g0910400 | OsR498G0102553900.01.T09 | Lysine ketoglutarate reductase trans-splicing related 1                       |
| maker-1-augustus-gene-472.17-mRNA-1 | Indica | NA     |           | Os01g0909200 | OsR498G0102551400.01.T02 | Endoribonuclease Dicer a                                                      |
| maker-1-augustus-gene-472.30-mRNA-1 | Indica | NA     |           | Os01g0909500 |                          | NPL domain-containing protein                                                 |
| maker-1-augustus-gene-472.6-mRNA-1  | Indica | NA     |           | Os01g0909300 |                          | Wiskott-Aldrich syndrome protein family member 2 like                         |
| maker-1-augustus-gene-473.0-mRNA-1  | Indica | NA     |           | Os01g0911200 | OsR498G0102555700.01.T01 | Dolichyl-diphosphooligosaccharide--protein glycosyltransferase subunit 2      |
| maker-1-augustus-gene-473.13-mRNA-1 | Indica | NA     |           |              | OsR498G1119986200.01.T02 | 4F5 domain-containing protein (Fragment)                                      |
| maker-1-augustus-gene-473.15-mRNA-1 | Indica | NA     | NBS-TM    | Os01g0911300 | OsR498G0102556000.01.T01 | ABC transporter B family member 26, chloroplastic                             |
| maker-1-augustus-gene-473.6-mRNA-1  | Indica | NA     |           | Os01g0911000 |                          | Neuroguidin                                                                   |
| maker-1-augustus-gene-473.8-mRNA-1  | Indica | NA     |           |              | OsR498G0102555000.01.T06 | DEAD-box ATP-dependent RNA helicase                                           |
| maker-1-augustus-gene-474.33-mRNA-1 | Indica | NA     |           | Os01g0911800 | OsR498G0102558100.01.T01 | BLISTER                                                                       |
| maker-1-augustus-gene-474.40-mRNA-1 | Indica | NA     |           |              | OsR498G0102559900.01.T01 | snRNA-activating protein complex subunit                                      |
| maker-1-augustus-gene-474.44-mRNA-1 | Indica | NA     |           | Os01g0912700 | OsR498G0102560100.01.T03 | Thioredoxin F-type chloroplastic                                              |
| maker-1-augustus-gene-474.48-mRNA-1 | Indica | NA     |           | Os01g0911700 | OsR498G0102558000.01.T02 | Regulatory protein viviparous-1                                               |
| maker-1-augustus-gene-474.51-mRNA-1 | Indica | NA     |           |              | OsR498G0102558400.01.T05 | Protein arginine methyltransferase NDUFAF7                                    |
| maker-1-augustus-gene-491.15-mRNA-1 | Indica | NA     |           | Os07g0513300 | OsR498G1120703200.01.T01 | PMD domain-containing protein (Fragment)                                      |
| maker-1-augustus-gene-495.0-mRNA-1  | Indica | NA     |           | Os01g0949700 | OsR498G0102701900.01.T03 | Glutathione S-transferase, N-terminal domain containing protein, expressed    |
| maker-1-augustus-gene-497.64-mRNA-1 | Indica | NA     |           | Os01g0953600 | OsR498G0102713200.01.T01 | NAD(P)H dehydrogenase (quinone)                                               |
| maker-1-augustus-gene-499.21-mRNA-1 | Indica | NA     |           | Os01g0956700 | OsR498G0102729800.01.T01 |                                                                               |
| maker-1-augustus-gene-500.16-mRNA-1 | Indica | NA     |           | Os01g0958500 | OsR498G0102735500.01.T01 | RNA-binding family protein isoform 1                                          |
| maker-1-augustus-gene-501.12-mRNA-1 | Indica | NA     |           |              |                          |                                                                               |
| maker-1-augustus-gene-501.50-mRNA-1 | Indica | NA     |           | Os01g0961600 | OsR498G0102743800.01.T01 |                                                                               |
| maker-1-augustus-gene-501.55-mRNA-1 | Indica | Indica |           | Os01g0962200 | OsR498G0102744800.01.T01 | Senescence associated proteingene 18 isoform 1                                |
| maker-1-augustus-gene-501.8-mRNA-1  | Indica | Indica |           | Os07g0651500 | OsR498G0102743500.01.T03 | ATP-dependent DNA helicase                                                    |
| maker-1-augustus-gene-504.60-mRNA-1 | Indica | NA     |           | Os01g0968300 | OsR498G0102762700.01.T01 | Late embryogenesis abundant protein-related / LEA protein-related             |
| maker-1-augustus-gene-504.78-mRNA-1 | Indica | Indica |           | Os01g0968300 | OsR498G0102762600.01.T01 | Late embryogenesis abundant protein-related / LEA protein-related             |



|                                      |        |          |              |              |                          |                                                                          |
|--------------------------------------|--------|----------|--------------|--------------|--------------------------|--------------------------------------------------------------------------|
| maker-1-augustus-gene-505.22-mRNA-1  | Indica | NA       |              |              | OsR498G0102769200.01.T02 |                                                                          |
| maker-1-augustus-gene-52.29-mRNA-1   | Indica | NA       |              | Os01g0195500 | OsR498G0100335800.01.T01 | Translation machinery-associated protein 22                              |
| maker-1-augustus-gene-67.0-mRNA-1    | Indica | Indica   |              | Os05g0215600 | OsR498G0100439900.01.T01 | Delta(8)-fatty-acid desaturase-like                                      |
| maker-1-augustus-gene-67.11-mRNA-1   | Indica | NA       |              |              | OsR498G0100441000.01.T02 | Peptidase C45, acyl-coenzyme A/6-aminopenicillanic acid acyl-transferase |
| maker-1-augustus-gene-67.2-mRNA-1    | Indica | NA       |              | Os01g0221600 | OsR498G0100440500.01.T08 | Aluminum-activated malate transporter like                               |
| maker-1-augustus-gene-67.6-mRNA-1    | Indica | NA       |              |              | OsR498G0100437400.01.T01 | Jasmonic acid-amino acid-conjugating enzyme                              |
| maker-1-augustus-gene-67.9-mRNA-1    | Indica | NA       |              | Os01g0221300 | OsR498G0100439000.01.T01 | Chromodomain-helicase-DNA-binding protein 1-like                         |
| maker-1-augustus-gene-7.14-mRNA-1    | Indica | Indica   |              | Os05g0103700 | OsR498G0100040000.01.T01 |                                                                          |
| maker-1-augustus-gene-7.22-mRNA-1    | Indica | NA       |              |              | OsR498G0100040600.01.T01 | U-box domain-containing protein 4                                        |
| maker-1-augustus-gene-7.25-mRNA-1    | Indica | NA       | Kinase-TM    | Os01g0113200 | OsR498G0100043400.01.T02 | Receptor serine/threonine kinase                                         |
| maker-1-augustus-gene-7.9-mRNA-1     | Indica | NA       | Kinase-TM    | Os01g0113300 | OsR498G0100043700.01.T01 | Iron-deficiency induced receptor-like kinase                             |
| maker-1-augustus-gene-8.130-mRNA-1   | Indica | Japonica |              | Os01g0115200 | OsR498G1119343800.01.T03 | Amidase signature enzyme                                                 |
| maker-1-augustus-gene-8.133-mRNA-1   | Indica | Indica   | Kinase-TM    | Os01g0113400 | OsR498G0100045600.01.T01 | Serine/threonine protein kinase                                          |
| maker-1-augustus-gene-8.134-mRNA-1   | Indica | Japonica | Kinase-TM    | Os01g0114100 | OsR498G0100046400.01.T01 | Putative rust resistance kinase Lr10                                     |
| maker-1-augustus-gene-8.139-mRNA-1   | Indica | Indica   | Kinase-TM    | Os01g0116200 | OsR498G0100046400.01.T07 | Putative rust resistance kinase Lr10                                     |
| maker-1-augustus-gene-8.141-mRNA-1   | Indica | Japonica | Kinase-TM    | Os01g0114600 | OsR498G0100047600.01.T01 | Receptor-like kinase                                                     |
| maker-1-augustus-gene-8.144-mRNA-1   | Indica | Indica   |              | Os01g0115750 | OsR498G0100050600.01.T01 | Putative rust resistance kinase Lr10                                     |
| maker-1-augustus-gene-8.47-mRNA-1    | Indica | Indica   | Kinase-TM    | Os01g0113800 | OsR498G0100045100.01.T01 | Putative rust resistance kinase Lr10                                     |
| maker-1-augustus-gene-8.48-mRNA-1    | Indica | NA       | Kinase-TM    | Os01g0113800 | OsR498G0100045700.01.T01 | Resistance-related receptor-like kinase                                  |
| maker-1-augustus-gene-8.49-mRNA-1    | Indica | NA       | Kinase-TM    | Os01g0115900 | OsR498G0100046700.01.T01 | Receptor-like protein kinase (Fragment)                                  |
| maker-1-augustus-gene-8.50-mRNA-1    | Indica | Japonica | Kinase-TM    | Os01g0114500 | OsR498G0100047300.01.T01 | Receptor serine/threonine kinase                                         |
| maker-1-augustus-gene-8.51-mRNA-1    | Indica | NA       | Kinase-TM    | Os01g0114700 | OsR498G0100047900.01.T01 | Resistance-related receptor-like kinase                                  |
| maker-1-augustus-gene-80.44-mRNA-1   | Indica | NA       |              | Os02g0140500 | OsR498G0101278400.01.T01 | Transposon protein, putative, Mutator sub-class, expressed               |
| maker-1-augustus-gene-80.55-mRNA-1   | Indica | NA       |              | Os01g0244400 | OsR498G0100533600.01.T01 | RNA-binding glycine-rich protein-like                                    |
| maker-1-augustus-gene-81.4-mRNA-1    | Indica | Indica   |              | Os01g0246700 | OsR498G0100541900.01.T01 | WRKY transcription factor                                                |
| maker-1-augustus-gene-9.101-mRNA-1   | Indica | NA       | Kinase-TM    | Os01g0116400 | OsR498G0100053600.01.T01 | Receptor-like kinase                                                     |
| maker-1-augustus-gene-9.102-mRNA-1   | Indica | Indica   |              | Os01g0116600 | OsR498G0100054400.01.T01 | Tr-type G domain-containing protein                                      |
| maker-1-augustus-gene-9.103-mRNA-1   | Indica | NA       |              | Os01g0116400 | OsR498G0100053600.01.T01 | Receptor kinase                                                          |
| maker-1-augustus-gene-9.105-mRNA-1   | Indica | Indica   | Kinase-TM    | Os01g0117400 | OsR498G0100056600.01.T01 | Putative rust resistance kinase Lr10                                     |
| maker-1-augustus-gene-9.181-mRNA-1   | Indica | NA       |              | Os01g0117850 | OsR498G0100057000.01.T04 |                                                                          |
| maker-1-augustus-gene-9.48-mRNA-1    | Indica | NA       |              | Os01g0115600 | OsR498G0100050900.01.T02 | Ser/Thr receptor-like kinase                                             |
| maker-1-augustus-gene-9.51-mRNA-1    | Indica | NA       | Kinase-TM    | Os01g0115900 | OsR498G0100052100.01.T01 | Receptor-like protein kinase (Fragment)                                  |
| maker-1-augustus-gene-9.52-mRNA-1    | Indica | Japonica | Kinase-TM    | Os01g0114500 | OsR498G0100045700.01.T01 | Protein kinase domain-containing protein                                 |
| maker-1-augustus-gene-9.53-mRNA-1    | Indica | Japonica |              | Os01g0116500 | OsR498G0100054700.01.T03 | Receptor kinase                                                          |
| maker-1-augustus-gene-9.75-mRNA-1    | Indica | Indica   | Kinase-TM    | Os01g0117500 | OsR498G0100056100.01.T02 | Putative rust resistance kinase Lr10                                     |
| maker-1-augustus-gene-9.81-mRNA-1    | Indica | Japonica | Kinase-TM    | Os01g0117100 | OsR498G0100056700.01.T02 | Receptor kinase                                                          |
| maker-1-augustus-gene-9.86-mRNA-1    | Indica | NA       | Kinase-TM    | Os01g0115750 | OsR498G0100051800.01.T01 | Putative rust resistance kinase Lr10                                     |
| maker-1-augustus-gene-9.99-mRNA-1    | Indica | Indica   | Kinase-TM    | Os01g0116000 | OsR498G0100052000.01.T01 | Serine/threonine protein kinase                                          |
| maker-1-augustus-gene-94.39-mRNA-1   | Indica | NA       | CC-NBS-TM    | Os01g0269500 | OsR498G0100629900.01.T03 | Putative NBS-LRR type disease resistance protein                         |
| maker-1-augustus-gene-96.8-mRNA-1    | Indica | NA       |              |              | OsR498G0509629200.01.T01 |                                                                          |
| maker-10-augustus-gene-1.0-mRNA-1    | Indica | Indica   | CC-Kinase-TM | Os10g0100500 | OsR498G1017994900.01.T04 | E3 ubiquitin ligase                                                      |
| maker-10-augustus-gene-1.7-mRNA-1    | Indica | NA       |              |              | OsR498G1017994000.01.T01 | Protein TIC 62, chloroplastic                                            |
| maker-10-augustus-gene-111.39-mRNA-1 | Indica | Indica   |              | Os03g0151800 | OsR498G1018799900.01.T01 | Cell division control protein 48 E                                       |
| maker-10-augustus-gene-111.45-mRNA-1 | Indica | NA       |              | Os10g0442900 | OsR498G1018800500.01.T01 | putative white-brown complex homolog protein 30 isoform X1               |
| maker-10-augustus-gene-111.52-mRNA-1 | Indica | NA       |              |              | OsR498G1018798600.01.T02 | Phosphoglycerate kinase                                                  |
| maker-10-augustus-gene-111.57-mRNA-1 | Indica | Indica   |              | Os10g0442300 | OsR498G1018798800.01.T01 | Glycosyltransferase                                                      |
| maker-10-augustus-gene-111.62-mRNA-1 | Indica | NA       | Kinase       |              | OsR498G1018800400.01.T01 | Putative serine/threonine-protein kinase NAK                             |
| maker-10-augustus-gene-111.64-mRNA-1 | Indica | NA       |              | Os03g0307400 | OsR498G0305792900.01.T01 | Six-bladed beta-propeller                                                |
| maker-10-augustus-gene-112.34-mRNA-1 | Indica | Japonica |              | Os10g0443200 | OsR498G1018801300.01.T01 | Translin like                                                            |
| maker-10-augustus-gene-112.37-mRNA-1 | Indica | NA       |              | Os10g0443800 | OsR498G1018801700.01.T01 | HTH myb-type domain-containing protein (Fragment)                        |
| maker-10-augustus-gene-112.38-mRNA-1 | Indica | NA       |              | Os10g0444400 | OsR498G1018802500.01.T02 | Macro domain-containing protein                                          |
| maker-10-augustus-gene-115.0-mRNA-1  | Indica | NA       |              | Os04g0167900 | OsR498G0407615000.01.T02 | Protein-serine/threonine phosphatase                                     |
| maker-10-augustus-gene-117.44-mRNA-1 | Indica | NA       |              | Os04g0165000 | OsR498G0407602000.01.T01 | Thaumatococcus-like protein 1a                                           |
| maker-10-augustus-gene-117.47-mRNA-1 | Indica | NA       |              |              | OsR498G0407601700.01.T02 | Limit dextrinase type starch debranching enzyme                          |
| maker-10-augustus-gene-118.0-mRNA-1  | Indica | NA       |              | Os04g0162100 | OsR498G0407596300.01.T01 | VEFS-Box domain-containing protein                                       |
| maker-10-augustus-gene-12.38-mRNA-1  | Indica | Indica   |              | Os10g0370700 | OsR498G1018036700.01.T02 | Putative LeOPT1-oligopeptide transporter                                 |
| maker-10-augustus-gene-12.44-mRNA-1  | Indica | Indica   |              | Os10g0112100 | OsR498G1018036600.01.T02 | Plant cadmium resistance 2                                               |
| maker-10-augustus-gene-12.48-mRNA-1  | Indica | NA       |              | Os10g0112600 | OsR498G1018037200.01.T01 | Transmembrane 9 superfamily member                                       |
| maker-10-augustus-gene-122.0-mRNA-1  | Indica | NA       |              | Os04g0155000 | OsR498G0407571100.01.T01 |                                                                          |
| maker-10-augustus-gene-122.2-mRNA-1  | Indica | NA       |              | Os04g0155200 | OsR498G0407574100.01.T01 |                                                                          |
| maker-10-augustus-gene-122.4-mRNA-1  | Indica | NA       |              | Os04g0155000 | OsR498G0407569300.01.T01 |                                                                          |

|                                      |        |          |               |              |                          |                                                      |
|--------------------------------------|--------|----------|---------------|--------------|--------------------------|------------------------------------------------------|
| maker-10-augustus-gene-122.5-mRNA-1  | Indica | NA       |               |              | OsR498G0407568700.01.T01 | DUF4220 domain-containing protein (Fragment)         |
| maker-10-augustus-gene-126.25-mRNA-1 | Indica | NA       |               | Os04g0142400 | OsR498G0407539400.01.T02 |                                                      |
| maker-10-augustus-gene-127.46-mRNA-1 | Indica | NA       | Kinase-TM     | Os04g0141400 | OsR498G0407537100.01.T01 | Putative receptor-type protein kinase LRK1           |
| maker-10-augustus-gene-127.48-mRNA-1 | Indica | NA       | Kinase-TM     | Os04g0141200 | OsR498G0407536900.01.T01 | Receptor-like serine/threonine-protein kinase        |
| maker-10-augustus-gene-127.52-mRNA-1 | Indica | NA       |               | Os02g0824700 | OsR498G0407530700.01.T04 | V-type proton ATPase subunit F                       |
| maker-10-augustus-gene-128.23-mRNA-1 | Indica | NA       |               | Os04g0136700 | OsR498G0407526200.01.T01 | CBS domain-containing protein CBSX1, chloroplastic   |
| maker-10-augustus-gene-128.30-mRNA-1 | Indica | NA       |               | Os04g0136900 | OsR498G0407526500.01.T01 | Serine-rich 25 kDa antigen protein                   |
| maker-10-augustus-gene-129.0-mRNA-1  | Indica | NA       |               | Os04g0476100 | OsR498G0407524800.01.T01 | Amine oxidase                                        |
| maker-10-augustus-gene-131.28-mRNA-1 | Indica | NA       | Kinase-TM     | Os04g0125700 | OsR498G0407519500.01.T01 | Lectin-domain containing receptor kinase A4.3        |
| maker-10-augustus-gene-131.30-mRNA-1 | Indica | NA       |               |              | OsR498G0407523100.01.T01 | Histidine decarboxylase                              |
| maker-10-augustus-gene-132.26-mRNA-1 | Indica | NA       |               |              |                          |                                                      |
| maker-10-augustus-gene-132.30-mRNA-1 | Indica | NA       |               | Os04g0134800 | OsR498G0407518700.01.T01 | Peroxidase                                           |
| maker-10-augustus-gene-133.0-mRNA-1  | Indica | NA       |               | Os04g0131900 | OsR498G0407513000.01.T01 | Sterol 3-beta-glucosyltransferase                    |
| maker-10-augustus-gene-133.8-mRNA-1  | Indica | NA       |               | Os04g0132300 | OsR498G0407513700.01.T03 | A1 cistron-splicing factor, AAR2                     |
| maker-10-augustus-gene-136.28-mRNA-1 | Indica | NA       |               | Os04g0127200 | OsR498G0407499700.01.T01 | Subtilisin-like protease SBT3.3                      |
| maker-10-augustus-gene-136.29-mRNA-1 | Indica | NA       |               | Os04g0127300 | OsR498G0407499700.01.T01 | Subtilisin-like protease SBT3.3                      |
| maker-10-augustus-gene-136.44-mRNA-1 | Indica | NA       |               | Os04g0121100 | OsR498G0407492700.01.T01 | Subtilisin-like serine endopeptidase family protein  |
| maker-10-augustus-gene-138.14-mRNA-1 | Indica | NA       |               | Os04g0121300 | OsR498G0407492700.01.T01 | Subtilisin-like protein protease SBT3.7              |
| maker-10-augustus-gene-138.18-mRNA-1 | Indica | NA       |               |              |                          | Subtilisin-like protease                             |
| maker-10-augustus-gene-139.33-mRNA-1 | Indica | NA       |               | Os04g0118400 | OsR498G0407485900.01.T07 | Tr-type G domain-containing protein                  |
| maker-10-augustus-gene-141.0-mRNA-1  | Indica | NA       |               |              | OsR498G0407475000.01.T01 | Putative leucine rich repeat                         |
| maker-10-augustus-gene-141.2-mRNA-1  | Indica | NA       |               |              |                          | Transposon protein, putative, Mutator sub-class      |
| maker-10-augustus-gene-142.3-mRNA-1  | Indica | NA       | Kinase-TM     | Os01g0136400 | OsR498G0100125200.01.T04 | Putative serine/threonine-protein kinase             |
| maker-10-augustus-gene-144.32-mRNA-1 | Indica | NA       | CC-LRR-NBS-TM | Os04g0111900 | OsR498G0407452000.01.T01 | Putative NB-ARC domain-containing protein (Fragment) |
| maker-10-augustus-gene-144.34-mRNA-1 | Indica | NA       |               | Os03g0743900 | OsR498G0407449600.01.T01 | Sulfate adenylyltransferase                          |
| maker-10-augustus-gene-145.10-mRNA-1 | Indica | NA       | Kinase-TM     | Os04g0109100 | OsR498G0407442600.01.T01 | Non-specific serine/threonine protein kinase         |
| maker-10-augustus-gene-145.12-mRNA-1 | Indica | NA       |               | Os04g0110400 | OsR498G0407447100.01.T01 | SASA domain-containing protein                       |
| maker-10-augustus-gene-145.15-mRNA-1 | Indica | NA       |               | Os04g0110300 | OsR498G0407446700.01.T01 | SWI/SNF complex subunit SWI3D                        |
| maker-10-augustus-gene-145.2-mRNA-1  | Indica | NA       |               |              | OsR498G0407447600.01.T01 | Zn-finger, RanBP-type, containing protein            |
| maker-10-augustus-gene-145.8-mRNA-1  | Indica | NA       |               |              | OsR498G0407445800.01.T01 |                                                      |
| maker-10-augustus-gene-146.42-mRNA-1 | Indica | NA       |               | Os09g0482610 | OsR498G0407437300.01.T01 | Heat shock protein 2                                 |
| maker-10-augustus-gene-147.42-mRNA-1 | Indica | NA       |               | Os04g0105700 | OsR498G0407429000.01.T10 | Dimethylallyl, adenosine tRNA methylthiotransferase  |
| maker-10-augustus-gene-147.45-mRNA-1 | Indica | NA       |               |              | OsR498G0407429000.01.T05 | Adenylate kinase                                     |
| maker-10-augustus-gene-147.49-mRNA-1 | Indica | NA       |               | Os04g0105400 | OsR498G0407428600.01.T01 | Ion channel regulatory protein, UNC-93               |
| maker-10-augustus-gene-147.53-mRNA-1 | Indica | NA       |               | Os04g0106400 | OsR498G0407430900.01.T02 | Glyoxylate/hydroxypyruvate reductase HPR3            |
| maker-10-augustus-gene-147.56-mRNA-1 | Indica | NA       |               | Os04g0106300 | OsR498G0407430700.01.T01 | Mitochondrion arginase                               |
| maker-10-augustus-gene-147.62-mRNA-1 | Indica | NA       |               | Os04g0105300 | OsR498G0407428300.01.T01 | Oxidoreductase                                       |
| maker-10-augustus-gene-148.27-mRNA-1 | Indica | NA       |               | Os04g0105100 | OsR498G0407426700.01.T01 | RING-CH-type domain-containing protein (Fragment)    |
| maker-10-augustus-gene-148.33-mRNA-1 | Indica | NA       |               |              |                          | Zinc finger CCCH domain-containing protein 24        |
| maker-10-augustus-gene-158.39-mRNA-1 | Indica | NA       |               | Os10g0457700 | OsR498G1018842700.01.T02 | ATP-dependent helicase ATRX                          |
| maker-10-augustus-gene-159.9-mRNA-1  | Indica | NA       |               |              |                          |                                                      |
| maker-10-augustus-gene-161.35-mRNA-1 | Indica | NA       |               |              | OsR498G1018856300.01.T01 | Plastid transcriptionally active 3                   |
| maker-10-augustus-gene-161.40-mRNA-1 | Indica | NA       |               | Os10g0462900 | OsR498G1018856700.01.T01 | Mitochondrial chaperonin-60                          |
| maker-10-augustus-gene-162.78-mRNA-1 | Indica | Indica   |               | Os10g0465000 | OsR498G1018863400.01.T04 | WD repeat-containing protein 26                      |
| maker-10-augustus-gene-163.13-mRNA-1 | Indica | NA       |               | Os10g0467600 | OsR498G1018869700.01.T01 | mRNA cap-binding protein (Fragment)                  |
| maker-10-augustus-gene-163.16-mRNA-1 | Indica | NA       |               | Os10g0467800 | OsR498G1018869900.01.T01 | Cellulose synthase                                   |
| maker-10-augustus-gene-163.28-mRNA-1 | Indica | Indica   | Kinase-LRR-TM | Os10g0467900 | OsR498G1018870200.01.T01 | Receptor protein kinase                              |
| maker-10-augustus-gene-164.27-mRNA-1 | Indica | NA       |               | Os10g0469900 | OsR498G1018875100.01.T01 | Peptide transporter PTR3-A                           |
| maker-10-augustus-gene-164.29-mRNA-1 | Indica | Japonica | LRR-TM        | Os10g0469600 | OsR498G1018872900.01.T01 | MDIS1-interacting receptor like kinase 2             |
| maker-10-augustus-gene-2.0-mRNA-1    | Indica | NA       |               | Os10g0101100 | OsR498G1017997000.01.T05 | Serine carboxypeptidase-like 18                      |
| maker-10-augustus-gene-2.4-mRNA-1    | Indica | NA       |               | Os10g0101200 | OsR498G1017997800.01.T02 | Serine carboxypeptidase                              |
| maker-10-augustus-gene-26.3-mRNA-1   | Indica | NA       |               | Os10g0138300 | OsR498G1018113300.01.T01 | F-box domain-containing protein (Fragment)           |
| maker-10-augustus-gene-27.0-mRNA-1   | Indica | NA       |               | Os10g0138600 | OsR498G1018113700.01.T01 | F-box domain containing protein, expressed           |
| maker-10-augustus-gene-27.2-mRNA-1   | Indica | NA       |               |              | OsR498G1018116900.01.T01 | F-box domain containing protein, expressed           |
| maker-10-augustus-gene-28.0-mRNA-1   | Indica | NA       |               | Os10g0141900 | OsR498G1018123300.01.T02 | Queuine tRNA-ribosyltransferase accessory subunit 2  |
| maker-10-augustus-gene-28.13-mRNA-1  | Indica | NA       |               |              |                          | Putative alpha-mannosidase                           |
| maker-10-augustus-gene-28.14-mRNA-1  | Indica | NA       |               |              |                          | Putative alpha-mannosidase                           |
| maker-10-augustus-gene-29.0-mRNA-1   | Indica | NA       |               |              | OsR498G1018125700.01.T01 | DUF4220 domain-containing protein (Fragment)         |
| maker-10-augustus-gene-3.24-mRNA-1   | Indica | Indica   |               | Os07g0248800 | OsR498G1018004100.01.T01 |                                                      |
| maker-10-augustus-gene-30.0-mRNA-1   | Indica | Japonica |               | Os10g0144700 | OsR498G1018131800.01.T01 | Cytochrome P450 family protein, expressed            |
| maker-10-augustus-gene-30.11-mRNA-1  | Indica | NA       |               | Os10g0146200 | OsR498G1018137200.01.T02 | Thaumatococcus-like protein 1                        |

|                                     |        |          |               |              |                          |                                                                       |
|-------------------------------------|--------|----------|---------------|--------------|--------------------------|-----------------------------------------------------------------------|
| maker-10-augustus-gene-30.2-mRNA-1  | Indica | NA       |               | Os10g0144800 |                          | F-box domain-containing protein                                       |
| maker-10-augustus-gene-31.0-mRNA-1  | Indica | Indica   |               | Os03g0244200 | OsR498G1018140100.01.T01 | Thaumatococcus-like protein 1                                         |
| maker-10-augustus-gene-31.4-mRNA-1  | Indica | NA       |               | Os10g0148100 | OsR498G1018145800.01.T01 | Proline-rich protein 4                                                |
| maker-10-augustus-gene-32.0-mRNA-1  | Indica | NA       |               | Os10g0148400 | OsR498G1018147200.01.T01 | Peptide transporter PTR5                                              |
| maker-10-augustus-gene-32.10-mRNA-1 | Indica | Indica   |               | Os10g0149200 | OsR498G1018149800.01.T01 | Proline-rich protein, putative, expressed                             |
| maker-10-augustus-gene-32.2-mRNA-1  | Indica | NA       |               | Os10g0148700 | OsR498G1018147400.01.T01 |                                                                       |
| maker-10-augustus-gene-32.4-mRNA-1  | Indica | NA       |               |              |                          | F-box domain-containing protein                                       |
| maker-10-augustus-gene-32.9-mRNA-1  | Indica | Indica   |               | Os10g0149200 | OsR498G1018149000.01.T01 | Proline-rich protein, putative, expressed                             |
| maker-10-augustus-gene-33.23-mRNA-1 | Indica | Japonica |               | Os10g0149400 | OsR498G1018150600.01.T01 | Proline-rich protein, putative, expressed                             |
| maker-10-augustus-gene-34.14-mRNA-1 | Indica | NA       |               | Os10g0150300 | OsR498G1018152000.01.T01 | Proline-rich protein (Fragment)                                       |
| maker-10-augustus-gene-35.0-mRNA-1  | Indica | NA       | Kinase-TM     |              |                          | Wall-associated receptor kinase 4                                     |
| maker-10-augustus-gene-36.47-mRNA-1 | Indica | NA       |               | Os10g0151800 | OsR498G1018157200.01.T02 | Heterogeneous nuclear ribonucleoprotein like                          |
| maker-10-augustus-gene-37.38-mRNA-1 | Indica | Japonica |               | Os10g0155400 | OsR498G1018168500.01.T04 | Amidase family protein, expressed                                     |
| maker-10-augustus-gene-37.42-mRNA-1 | Indica | Japonica | Kinase-LRR-TM | Os10g0155733 | OsR498G1018170700.01.T01 | Leucine-rich repeat receptor-like protein kinase PEPR1                |
| maker-10-augustus-gene-37.44-mRNA-1 | Indica | NA       |               | Os10g0155500 | OsR498G1018169000.01.T01 | Aldose 1-epimerase                                                    |
| maker-10-augustus-gene-4.11-mRNA-1  | Indica | NA       |               | Os10g0104500 | OsR498G1018011400.01.T01 | Notchless protein isogeny                                             |
| maker-10-augustus-gene-4.12-mRNA-1  | Indica | NA       |               | Os10g0104500 | OsR498G1018011400.01.T01 | Notchless protein like                                                |
| maker-10-augustus-gene-4.3-mRNA-1   | Indica | Indica   |               | Os10g0561800 | OsR498G1018006400.01.T01 | Homeobox-leucine zipper protein HOX15                                 |
| maker-10-augustus-gene-4.6-mRNA-1   | Indica | NA       |               | Os10g0103800 | OsR498G1018008200.01.T01 | Inositol-tetrakisphosphate 1-kinase                                   |
| maker-10-augustus-gene-40.0-mRNA-1  | Indica | Indica   |               | Os10g0159600 | OsR498G1018187400.01.T01 | SHSP domain-containing protein                                        |
| maker-10-augustus-gene-40.3-mRNA-1  | Indica | NA       |               | Os10g0159700 | OsR498G1018188000.01.T01 | SHSP domain-containing protein                                        |
| maker-10-augustus-gene-40.8-mRNA-1  | Indica | NA       |               | Os10g0159800 | OsR498G1018188600.01.T01 | Alcohol dehydrogenase                                                 |
| maker-10-augustus-gene-41.20-mRNA-1 | Indica | Japonica |               | Os10g0141400 | OsR498G0305555000.01.T04 | Putative 26S proteasome regulatory subunit S5A                        |
| maker-10-augustus-gene-41.22-mRNA-1 | Indica | NA       |               |              |                          | Ubiquitin carboxyl-terminal hydrolase                                 |
| maker-10-augustus-gene-41.28-mRNA-1 | Indica | NA       |               | Os10g0160700 | OsR498G1018196400.01.T01 |                                                                       |
| maker-10-augustus-gene-42.42-mRNA-1 | Indica | NA       |               | Os10g0161700 | OsR498G1018198900.01.T02 | DUF295 domain-containing protein                                      |
| maker-10-augustus-gene-42.43-mRNA-1 | Indica | Indica   |               | Os10g0162400 | OsR498G1018201700.01.T05 | Filament-like plant protein 4                                         |
| maker-10-augustus-gene-42.47-mRNA-1 | Indica | NA       |               |              | OsR498G1018197000.01.T02 |                                                                       |
| maker-10-augustus-gene-42.49-mRNA-1 | Indica | NA       |               |              | OsR498G1018199600.01.T01 | Fork head domain transcription factor slp2 like                       |
| maker-10-augustus-gene-43.32-mRNA-1 | Indica | NA       |               | Os10g0162600 | OsR498G1018202600.01.T01 | LOB domain-containing protein 18                                      |
| maker-10-augustus-gene-43.39-mRNA-1 | Indica | Indica   | Kinase-TM     | Os10g0174800 | OsR498G1018204400.01.T01 | Wall associated kinase                                                |
| maker-10-augustus-gene-47.26-mRNA-1 | Indica | Indica   |               | Os10g0166600 | OsR498G1018232300.01.T01 | Geraniol 8-hydroxylase                                                |
| maker-10-augustus-gene-48.36-mRNA-1 | Indica | NA       |               | Os10g0166600 | OsR498G1018238100.01.T01 | 7-ethoxycoumarin O-deethylase                                         |
| maker-10-augustus-gene-49.10-mRNA-1 | Indica | Indica   |               | Os10g0167900 | OsR498G1018243700.01.T01 | Putative chalcone synthase                                            |
| maker-10-augustus-gene-49.2-mRNA-1  | Indica | Japonica |               | Os10g0167500 | OsR498G1018239500.01.T02 | RNA recognition motif family protein, expressed                       |
| maker-10-augustus-gene-49.20-mRNA-1 | Indica | NA       |               |              | OsR498G1018239800.01.T03 | DNA photolyase                                                        |
| maker-10-augustus-gene-49.7-mRNA-1  | Indica | NA       |               | Os10g0167900 | OsR498G1018241300.01.T01 | Putative chalcone synthase                                            |
| maker-10-augustus-gene-5.0-mRNA-1   | Indica | NA       |               |              | OsR498G1018014500.01.T02 | Serine decarboxylase 2                                                |
| maker-10-augustus-gene-5.14-mRNA-1  | Indica | NA       |               | Os10g0105900 | OsR498G1018015000.01.T01 | Acyl transferase 1                                                    |
| maker-10-augustus-gene-5.4-mRNA-1   | Indica | NA       |               |              | OsR498G1018012600.01.T02 | DNA methyl transferase2                                               |
| maker-10-augustus-gene-5.9-mRNA-1   | Indica | NA       |               | Os10g0105400 | OsR498G1018013200.01.T01 |                                                                       |
| maker-10-augustus-gene-50.11-mRNA-1 | Indica | NA       |               |              | OsR498G1018247800.01.T01 |                                                                       |
| maker-10-augustus-gene-50.2-mRNA-1  | Indica | NA       |               | Os10g0169800 | OsR498G1018248100.01.T06 | Masparidin                                                            |
| maker-10-augustus-gene-51.0-mRNA-1  | Indica | NA       |               | Os10g0170200 | OsR498G1018250900.01.T02 | Ribosomal protein S10                                                 |
| maker-10-augustus-gene-51.3-mRNA-1  | Indica | NA       |               | Os10g0170300 | OsR498G1018251300.01.T01 | GPI ethanolamine phosphate transferase 3                              |
| maker-10-augustus-gene-51.9-mRNA-1  | Indica | NA       |               | Os10g0171300 |                          | Cytochrome P450 family protein, expressed                             |
| maker-10-augustus-gene-52.0-mRNA-1  | Indica | NA       |               |              | OsR498G1018256100.01.T01 | 5-epiaristolochene 1,3-dihydroxylase                                  |
| maker-10-augustus-gene-52.2-mRNA-1  | Indica | NA       |               |              | OsR498G1018254200.01.T01 | Geraniol 8-hydroxylase                                                |
| maker-10-augustus-gene-54.0-mRNA-1  | Indica | NA       |               |              |                          | Wall-associated receptor kinase 1                                     |
| maker-10-augustus-gene-54.2-mRNA-1  | Indica | NA       |               | Os10g0174800 |                          | Wall-associated receptor kinase 1                                     |
| maker-10-augustus-gene-55.0-mRNA-1  | Indica | NA       |               |              | OsR498G1018264800.01.T01 | No apical meristem protein, expressed                                 |
| maker-10-augustus-gene-55.1-mRNA-1  | Indica | NA       |               | Os10g0177200 | OsR498G1018265600.01.T01 | 39 kDa EF-Hand containing protein, putative, expressed                |
| maker-10-augustus-gene-56.25-mRNA-1 | Indica | Japonica |               | Os10g0177300 | OsR498G1018222500.01.T01 | Chalcone and stilbene synthases, N-terminal domain containing protein |
| maker-10-augustus-gene-56.28-mRNA-1 | Indica | NA       |               |              | OsR498G1018267400.01.T04 | TCP domain-containing protein                                         |
| maker-10-augustus-gene-58.41-mRNA-1 | Indica | NA       |               | Os10g0182000 | OsR498G1018282900.01.T01 | Alanine--tRNA ligase                                                  |
| maker-10-augustus-gene-58.52-mRNA-1 | Indica | NA       |               | Os10g0181700 | OsR498G1018282200.01.T01 | Protein MICRORCHIDIA 1                                                |
| maker-10-augustus-gene-6.0-mRNA-1   | Indica | NA       |               | Os10g0106701 |                          | Acyl transferase 1                                                    |
| maker-10-augustus-gene-6.1-mRNA-1   | Indica | Japonica |               | Os10g0106701 | OsR498G1018015700.01.T01 | Benzyl alcohol O-benzoyltransferase                                   |
| maker-10-augustus-gene-6.2-mRNA-1   | Indica | NA       |               |              | OsR498G1018019400.01.T01 | ATP-dependent DNA helicase                                            |
| maker-10-augustus-gene-61.19-mRNA-1 | Indica | NA       | CC-Kinase-TM  | Os03g0251700 | OsR498G0305588100.01.T01 | Receptor-like serine/threonine-protein kinase                         |
| maker-10-augustus-gene-62.11-mRNA-1 | Indica | NA       |               | Os10g0188100 | OsR498G1018308400.01.T02 | Transcription initiation factor IIF subunit alpha                     |

|                                      |        |          |               |              |                          |                                                                      |
|--------------------------------------|--------|----------|---------------|--------------|--------------------------|----------------------------------------------------------------------|
| maker-10-augustus-gene-64.18-mRNA-1  | Indica | NA       |               | Os10g0190500 | OsR498G1018321600.01.T03 | DUF4220 domain-containing protein (Fragment)                         |
| maker-10-augustus-gene-68.35-mRNA-1  | Indica | NA       |               |              | OsR498G1221332900.01.T01 | Retrotransposon protein, putative, unclassified                      |
| maker-10-augustus-gene-7.33-mRNA-1   | Indica | NA       |               | Os10g0108700 | OsR498G1018023900.01.T01 | Acyl transferase 15                                                  |
| maker-10-augustus-gene-7.34-mRNA-1   | Indica | NA       |               | Os12g0468900 | OsR498G0305961100.01.T01 | Cell wall protein-like                                               |
| maker-10-augustus-gene-73.43-mRNA-1  | Indica | NA       |               | Os10g0197132 |                          |                                                                      |
| maker-10-augustus-gene-78.7-mRNA-1   | Indica | NA       |               | Os10g0204400 | OsR498G1018371000.01.T02 | Phosphoenolpyruvate carboxykinase (ATP)                              |
| maker-10-augustus-gene-8.0-mRNA-1    | Indica | NA       |               | Os10g0109300 | OsR498G1018027200.01.T02 | Peroxidase                                                           |
| maker-10-augustus-gene-8.3-mRNA-1    | Indica | NA       |               |              | OsR498G1018029600.01.T01 | POT family protein, expressed                                        |
| maker-10-augustus-gene-8.5-mRNA-1    | Indica | NA       |               | Os10g0110600 | OsR498G1018031200.01.T01 | Putative proton-dependent oligopeptide transport                     |
| maker-10-augustus-gene-80.3-mRNA-1   | Indica | NA       |               | Os10g0206800 | OsR498G1018380100.01.T08 | Protein DETOXIFICATION                                               |
| maker-10-augustus-gene-81.0-mRNA-1   | Indica | Indica   |               | Os10g0207500 | OsR498G1018384500.01.T01 | Protein TAPETUM DETERMINANT 1                                        |
| maker-10-augustus-gene-81.2-mRNA-1   | Indica | NA       |               | Os10g0207700 | OsR498G1018383500.01.T01 | protein PYRICULARIA ORYZAE RESISTANCE 21-like                        |
| maker-10-augustus-gene-81.5-mRNA-1   | Indica | Indica   |               | Os02g0586400 | OsR498G1018385400.01.T01 | GTP-binding 2                                                        |
| maker-10-augustus-gene-82.0-mRNA-1   | Indica | NA       |               |              | OsR498G1018387300.01.T05 | Oxoglutarate/iron-dependent dioxygenase                              |
| maker-10-augustus-gene-82.2-mRNA-1   | Indica | Japonica |               | Os10g0208600 | OsR498G1018387600.01.T01 | Pollen Ole e 1 allergen and extensin family protein                  |
| maker-10-augustus-gene-83.3-mRNA-1   | Indica | NA       |               | Os10g0464400 | OsR498G1018862400.01.T01 | Riboflavin kinase                                                    |
| maker-10-augustus-gene-9.27-mRNA-1   | Indica | Indica   |               | Os10g0370700 | OsR498G1018031600.01.T06 | Major Facilitator Superfamily protein, expressed                     |
| maker-10-augustus-gene-9.32-mRNA-1   | Indica | Indica   |               | Os10g0370700 | OsR498G1018032200.01.T01 | Putative LeOPT1-oligopeptide transporter                             |
| maker-10-augustus-gene-9.40-mRNA-1   | Indica | Indica   |               | Os10g0111700 | OsR498G1018034200.01.T01 | Putative LeOPT1-oligopeptide transporter                             |
| maker-10-augustus-gene-91.0-mRNA-1   | Indica | NA       |               |              | OsR498G1018396800.01.T02 | Arginine and glutamate-rich protein 1                                |
| maker-10-augustus-gene-92.18-mRNA-1  | Indica | NA       |               | Os10g0213100 |                          | 4-aminobutyrate--pyruvate transaminase                               |
| maker-11-augustus-gene-122.25-mRNA-1 | Indica | Indica   |               | Os11g0446500 | OsR498G1120055700.01.T02 | Phospholipid-transporting ATPase                                     |
| maker-11-augustus-gene-123.41-mRNA-1 | Indica | Japonica | Kinase-LRR-TM | Os11g0448000 | OsR498G1120059500.01.T01 | Receptor-like kinase TMK4 isoform A                                  |
| maker-11-augustus-gene-133.30-mRNA-1 | Indica | Japonica |               | Os11g0465200 | OsR498G1120113400.01.T01 | Indole-2-monooxygenase                                               |
| maker-11-augustus-gene-137.48-mRNA-1 | Indica | NA       |               |              | OsR498G1120128100.01.T01 | Aromatic amino acid decarboxylase 2                                  |
| maker-11-augustus-gene-138.0-mRNA-1  | Indica | Indica   |               | Os11g0474800 | OsR498G1120128800.01.T01 | Ent-isokaurene synthase                                              |
| maker-11-augustus-gene-14.71-mRNA-1  | Indica | Japonica |               | Os11g0146100 | OsR498G1119406000.01.T01 | Phosphatidylinositol 4-phosphate 5-kinase                            |
| maker-11-augustus-gene-14.72-mRNA-1  | Indica | NA       |               |              |                          | 1-phosphatidylinositol-4-phosphate 5-kinase                          |
| maker-11-augustus-gene-142.50-mRNA-1 | Indica | NA       | NBS-TM        |              |                          | Pollen signalling protein with adenyllyl cyclase activity (Fragment) |
| maker-11-augustus-gene-143.25-mRNA-1 | Indica | NA       |               | Os11g0481200 | OsR498G1120145600.01.T01 | O-fucosyltransferase family protein (Fragment)                       |
| maker-11-augustus-gene-147.38-mRNA-1 | Indica | NA       |               | Os11g0485200 | OsR498G1120160600.01.T05 | ATPase 2 plasma membrane-type                                        |
| maker-11-augustus-gene-149.39-mRNA-1 | Indica | NA       | CC-NBS-TM     |              |                          | Putative NBS-LRR type disease resistance protein                     |
| maker-11-augustus-gene-246.17-mRNA-1 | Indica | NA       |               | Os11g0671000 | OsR498G1120700800.01.T01 | Auxin-repressed 12.5 kDa protein (Fragment)                          |
| maker-11-augustus-gene-247.0-mRNA-1  | Indica | NA       | CC-Kinase-TM  |              |                          | S-receptor kinase-like protein 1-like                                |
| maker-11-augustus-gene-248.27-mRNA-1 | Indica | NA       | CC-LRR-NBS-TM | Os11g0677101 | OsR498G1120709900.01.T01 | Putative nucleotide-binding leucine-rich-repeat protein 1            |
| maker-11-augustus-gene-248.28-mRNA-1 | Indica | NA       |               |              | OsR498G1120713900.01.T01 | Retrotransposon protein, putative, unclassified                      |
| maker-11-augustus-gene-248.45-mRNA-1 | Indica | Indica   |               | Os11g0673200 | OsR498G1120707800.01.T01 | Beta-xylosidase 2                                                    |
| maker-11-augustus-gene-254.0-mRNA-1  | Indica | NA       |               | Os11g0687100 | OsR498G1120737300.01.T01 | von Willebrand factor type A domain-like                             |
| maker-11-augustus-gene-254.2-mRNA-1  | Indica | NA       |               | Os11g0687200 | OsR498G1120737500.01.T01 | von Willebrand factor type A domain-like                             |
| maker-11-augustus-gene-255.12-mRNA-1 | Indica | NA       |               | Os11g0689300 | OsR498G1120738400.01.T01 | Calmodulin-binding protein MPCBP                                     |
| maker-11-augustus-gene-255.2-mRNA-1  | Indica | NA       |               | Os11g0689400 | OsR498G1120738500.01.T02 | DEAD-box ATP-dependent RNA helicase 40                               |
| maker-11-augustus-gene-256.34-mRNA-1 | Indica | NA       | Kinase-TM     | Os11g0695850 | OsR498G1120743300.01.T02 | Wall-associated receptor kinase                                      |
| maker-11-augustus-gene-256.35-mRNA-1 | Indica | NA       | Kinase-TM     |              |                          | Putative inactive receptor kinase RLK902                             |
| maker-11-augustus-gene-259.37-mRNA-1 | Indica | Indica   |               | Os12g0566300 | OsR498G1120756900.01.T01 | ATP citrate synthase                                                 |
| maker-11-augustus-gene-259.44-mRNA-1 | Indica | NA       |               | Os11g0696400 | OsR498G1120757100.01.T01 | Beta-D-xylosidase                                                    |
| maker-11-augustus-gene-259.46-mRNA-1 | Indica | NA       |               | Os11g0695900 | OsR498G1120756600.01.T02 | ARM repeat superfamily protein                                       |
| maker-11-augustus-gene-259.52-mRNA-1 | Indica | NA       |               | Os10g0186800 | OsR498G1221417300.01.T01 |                                                                      |
| maker-11-augustus-gene-260.2-mRNA-1  | Indica | NA       |               |              | OsR498G0815996300.01.T01 | Transposon protein, putative, CACTA, En/Spm sub-class                |
| maker-11-augustus-gene-261.65-mRNA-1 | Indica | NA       |               | Os11g0703400 | OsR498G1120766200.01.T01 | Charged multivesicular body protein 2a                               |
| maker-11-augustus-gene-262.39-mRNA-1 | Indica | NA       |               | Os11g0703900 | OsR498G1120767700.01.T01 | Non-cell-autonomous heat shock cognate protein 70                    |
| maker-11-augustus-gene-262.42-mRNA-1 | Indica | NA       |               | Os11g0704000 | OsR498G1120768100.01.T01 | Selenoprotein H                                                      |
| maker-11-augustus-gene-262.44-mRNA-1 | Indica | NA       |               | Os11g0704300 | OsR498G1120769100.01.T01 | Probable GTP-binding protein OBG, mitochondrial                      |
| maker-11-augustus-gene-38.28-mRNA-1  | Indica | NA       |               | Os11g0186200 | OsR498G1119534500.01.T01 | Aldehyde dehydrogenase                                               |
| maker-11-augustus-gene-38.32-mRNA-1  | Indica | NA       |               | Os11g0186300 | OsR498G1119534700.01.T01 | Methyltransferase                                                    |
| maker-11-augustus-gene-40.1-mRNA-1   | Indica | NA       |               |              |                          | Terpene cyclase/mutase family member                                 |
| maker-11-augustus-gene-40.6-mRNA-1   | Indica | NA       |               |              | OsR498G1119542100.01.T01 |                                                                      |
| maker-11-augustus-gene-40.9-mRNA-1   | Indica | NA       |               | Os11g0189900 |                          | NAD kinase 2 chloroplastic                                           |
| maker-11-augustus-gene-41.0-mRNA-1   | Indica | NA       |               |              | OsR498G1119543500.01.T01 |                                                                      |
| maker-11-augustus-gene-65.38-mRNA-1  | Indica | NA       |               | Os11g0199700 |                          | Target of Myb protein 1                                              |
| maker-11-augustus-gene-66.39-mRNA-1  | Indica | NA       |               | Os11g0200600 | OsR498G1119570700.01.T03 | F-box domain containing protein, expressed                           |
| maker-11-augustus-gene-66.44-mRNA-1  | Indica | NA       |               |              | OsR498G1119570600.01.T04 | F-box domain containing protein, expressed                           |

|                                      |        |          |                     |              |                          |                                                                            |
|--------------------------------------|--------|----------|---------------------|--------------|--------------------------|----------------------------------------------------------------------------|
| maker-11-augustus-gene-66.48-mRNA-1  | Indica | NA       |                     |              |                          | F-box domain-containing protein (Fragment)                                 |
| maker-11-augustus-gene-67.46-mRNA-1  | Indica | NA       |                     | Os11g0202600 |                          | zf-HYPP domain-containing protein                                          |
| maker-11-augustus-gene-67.59-mRNA-1  | Indica | NA       |                     |              |                          | Glutamic acid-rich protein, putative (Fragment)                            |
| maker-11-augustus-gene-68.0-mRNA-1   | Indica | NA       |                     | Os05g0580000 | OsR498G0511403400.01.T04 | Glucose-1-phosphate adenylyltransferase large subunit, chloroplastic/amylo |
| maker-11-augustus-gene-69.35-mRNA-1  | Indica | NA       |                     | Os11g0205500 | OsR498G1119581200.01.T01 |                                                                            |
| maker-11-augustus-gene-69.39-mRNA-1  | Indica | Japonica |                     | Os11g0205900 | OsR498G1119582800.01.T01 | F-box domain containing protein, expressed                                 |
| maker-11-augustus-gene-73.0-mRNA-1   | Indica | Indica   |                     | Os06g0614300 | OsR498G1119608300.01.T06 | TBCC domain-containing protein 1                                           |
| maker-11-augustus-gene-73.12-mRNA-1  | Indica | NA       |                     | Os11g0210600 | OsR498G1119607600.01.T02 | Cinnamyl-alcohol dehydrogenase                                             |
| maker-11-augustus-gene-73.13-mRNA-1  | Indica | Indica   |                     | Os11g0210600 | OsR498G1119607600.01.T03 | Cinnamyl-alcohol dehydrogenase                                             |
| maker-11-augustus-gene-74.11-mRNA-1  | Indica | NA       | Kinase-TM           |              | OsR498G1119612600.01.T01 | Protein kinase domain containing protein, expressed                        |
| maker-11-augustus-gene-74.2-mRNA-1   | Indica | NA       | LRR-TM              |              | OsR498G1119610600.01.T03 | NBS-LRR disease resistance protein family-4                                |
| maker-11-augustus-gene-75.0-mRNA-1   | Indica | NA       |                     |              |                          |                                                                            |
| maker-11-augustus-gene-82.0-mRNA-1   | Indica | Japonica | CC-NBS-TM RGA5, Pia | Os11g0225300 | OsR498G1119642700.01.T03 | NBS-LRR type protein (Fragment)                                            |
| maker-11-augustus-gene-82.2-mRNA-1   | Indica | NA       | Kinase              |              |                          | Retrotransposon protein, putative, LINE subclass                           |
| maker-11-augustus-gene-83.3-mRNA-1   | Indica | Japonica | CC-LRR-NBS-TM       | Os11g0227100 | OsR498G1119648000.01.T02 | NBS-LRR type resistance protein (Fragment)                                 |
| maker-11-augustus-gene-84.6-mRNA-1   | Indica | NA       |                     | Os11g0231600 | OsR498G1119654700.01.T01 | F-box domain containing protein, expressed                                 |
| maker-11-augustus-gene-86.11-mRNA-1  | Indica | NA       |                     |              | OsR498G1119665400.01.T02 | Glycerophosphodiester phosphodiesterase                                    |
| maker-11-augustus-gene-86.3-mRNA-1   | Indica | NA       |                     | Os11g0234200 | OsR498G1119661800.01.T01 | PHD domain-containing protein (Fragment)                                   |
| maker-11-augustus-gene-86.6-mRNA-1   | Indica | NA       |                     | Os11g0235200 | OsR498G1119662400.01.T01 | Proton-dependent oligopeptide transporter family                           |
| maker-11-augustus-gene-87.44-mRNA-1  | Indica | NA       | NBS                 | Os12g0263800 |                          | Cyprosin                                                                   |
| maker-12-augustus-gene-114.22-mRNA-1 | Indica | NA       |                     |              |                          | SGF29 C-terminal domain-containing protein                                 |
| maker-12-augustus-gene-126.0-mRNA-1  | Indica | NA       |                     |              |                          |                                                                            |
| maker-12-augustus-gene-126.2-mRNA-1  | Indica | NA       |                     |              |                          | Phosphatidylinositol 3,4,5-trisphosphate 3-phosphatase and protein-tyrosin |
| maker-12-augustus-gene-129.27-mRNA-1 | Indica | NA       |                     | Os12g0411700 | OsR498G1221382800.01.T01 | ABC transporter domain-containing protein                                  |
| maker-12-augustus-gene-131.20-mRNA-1 | Indica | NA       |                     | Os12g0414500 | OsR498G1221394200.01.T01 | Asparagine--tRNA ligase                                                    |
| maker-12-augustus-gene-133.0-mRNA-1  | Indica | NA       |                     |              |                          |                                                                            |
| maker-12-augustus-gene-134.26-mRNA-1 | Indica | NA       |                     | Os02g0701833 | OsR498G0203665800.01.T01 | ATP-dependent DNA helicase                                                 |
| maker-12-augustus-gene-134.28-mRNA-1 | Indica | NA       |                     | Os02g0701833 | OsR498G0916979800.01.T01 | ATP-dependent DNA helicase                                                 |
| maker-12-augustus-gene-135.11-mRNA-1 | Indica | NA       |                     | Os12g0420400 | OsR498G1221413300.01.T03 | PSI subunit V                                                              |
| maker-12-augustus-gene-135.13-mRNA-1 | Indica | Japonica |                     | Os12g0420000 | OsR498G0408810600.01.T03 | 2-phosphoglycolate phosphatase, eukaryotic                                 |
| maker-12-augustus-gene-135.2-mRNA-1  | Indica | Indica   |                     | Os12g0420200 | OsR498G1221412700.01.T01 | Chloroplast stem-loop binding protein like                                 |
| maker-12-augustus-gene-135.7-mRNA-1  | Indica | NA       |                     |              | OsR498G1221413100.01.T02 | Tyrosine-protein phosphatase DSP1                                          |
| maker-12-augustus-gene-138.36-mRNA-1 | Indica | NA       |                     | Os01g0284200 | OsR498G0100683700.01.T01 |                                                                            |
| maker-12-augustus-gene-139.0-mRNA-1  | Indica | NA       |                     | Os12g0425600 | OsR498G1221425300.01.T01 | O-fucosyltransferase family protein (Fragment)                             |
| maker-12-augustus-gene-140.4-mRNA-1  | Indica | NA       |                     |              |                          | Autophagy-related protein 101                                              |
| maker-12-augustus-gene-147.2-mRNA-1  | Indica | NA       |                     |              | OsR498G1221451000.01.T01 | PHD-type domain-containing protein                                         |
| maker-12-augustus-gene-147.6-mRNA-1  | Indica | NA       | Kinase-TM           | Os12g0433500 | OsR498G1221451200.01.T03 | serine/threonine-protein kinase TIO                                        |
| maker-12-augustus-gene-148.23-mRNA-1 | Indica | NA       |                     | Os12g0434400 | OsR498G1221453900.01.T01 | Putative aminopeptidase of the M17 family                                  |
| maker-12-augustus-gene-2.56-mRNA-1   | Indica | NA       |                     | Os11g0104200 | OsR498G1119282100.01.T01 | IBR domain-containing protein                                              |
| maker-12-augustus-gene-209.21-mRNA-1 | Indica | NA       |                     | Os12g0515400 | OsR498G1221715500.01.T01 | Dicarboxylate transporter 1 chloroplastic                                  |
| maker-12-augustus-gene-209.24-mRNA-1 | Indica | NA       |                     | Os12g0516000 |                          |                                                                            |
| maker-12-augustus-gene-209.28-mRNA-1 | Indica | NA       |                     | Os12g0515300 | OsR498G1221715000.01.T01 | Transcription factor like                                                  |
| maker-12-augustus-gene-209.30-mRNA-1 | Indica | NA       |                     | Os12g0515600 | OsR498G1221716600.01.T01 | Guanylate kinase                                                           |
| maker-12-augustus-gene-211.37-mRNA-1 | Indica | NA       |                     | Os12g0527500 | OsR498G1221723300.01.T01 | F-box domain containing protein, expressed                                 |
| maker-12-augustus-gene-211.39-mRNA-1 | Indica | NA       |                     |              | OsR498G1221724500.01.T02 | Non-specific serine/threonine protein kinase                               |
| maker-12-augustus-gene-211.42-mRNA-1 | Indica | Indica   |                     | Os12g0527850 | OsR498G1221725100.01.T01 | Pentatricopeptide repeat-containing protein mitochondrial                  |
| maker-12-augustus-gene-211.44-mRNA-1 | Indica | NA       |                     |              |                          | PHD finger family protein isoform 1                                        |
| maker-12-augustus-gene-211.49-mRNA-1 | Indica | Indica   |                     | Os12g0528000 | OsR498G1221725400.01.T02 | DNA-binding protein PD2                                                    |
| maker-12-augustus-gene-212.40-mRNA-1 | Indica | Indica   |                     | Os12g0528300 | OsR498G1221726300.01.T01 | MHD domain-containing death-inducing                                       |
| maker-12-augustus-gene-212.44-mRNA-1 | Indica | NA       |                     |              | OsR498G1221726500.01.T02 | Glutathione synthetase, chloroplastic                                      |
| maker-12-augustus-gene-212.49-mRNA-1 | Indica | NA       |                     | Os12g0529400 | OsR498G1221728300.01.T02 | Auxin-binding protein 4                                                    |
| maker-12-augustus-gene-212.52-mRNA-1 | Indica | NA       |                     |              |                          | zinc finger MYM-type protein 1-like                                        |
| maker-12-augustus-gene-212.54-mRNA-1 | Indica | NA       |                     | Os12g0530000 | OsR498G1221729000.01.T01 |                                                                            |
| maker-12-augustus-gene-212.56-mRNA-1 | Indica | NA       |                     | Os12g0530100 | OsR498G1221729200.01.T02 | Peroxidase                                                                 |
| maker-12-augustus-gene-213.0-mRNA-1  | Indica | NA       |                     |              |                          | Ribosomal protein-like                                                     |
| maker-12-augustus-gene-216.65-mRNA-1 | Indica | NA       |                     | Os12g0534200 | OsR498G1221759000.01.T01 | Acyl carrier protein 1, chloroplastic                                      |
| maker-12-augustus-gene-217.50-mRNA-1 | Indica | Japonica |                     | Os12g0535600 | OsR498G1221764600.01.T01 | rRNA N-glycosidase                                                         |
| maker-12-augustus-gene-221.0-mRNA-1  | Indica | NA       |                     |              | OsR498G0407881700.01.T01 | Transposon protein, putative, Mutator sub-class, expressed                 |
| maker-12-augustus-gene-223.29-mRNA-1 | Indica | NA       |                     |              |                          | NAM-associated domain-containing protein                                   |
| maker-12-augustus-gene-225.11-mRNA-1 | Indica | NA       |                     | Os12g0548100 | OsR498G1221838400.01.T02 | Cnd1 domain-containing protein (Fragment)                                  |
| maker-12-augustus-gene-226.10-mRNA-1 | Indica | Indica   |                     | Os12g0551200 | OsR498G1221848400.01.T01 | Patatin                                                                    |

|                                      |        |          |           |              |                          |                                                                            |
|--------------------------------------|--------|----------|-----------|--------------|--------------------------|----------------------------------------------------------------------------|
| maker-12-augustus-gene-226.4-mRNA-1  | Indica | NA       |           | Os12g0548200 | OsR498G1221839000.01.T01 | Auxilin-related protein 1                                                  |
| maker-12-augustus-gene-228.29-mRNA-1 | Indica | Indica   |           | Os12g0552700 | OsR498G1221853700.01.T01 | F-box/LRR-repeat protein 3-like isoform X2                                 |
| maker-12-augustus-gene-228.61-mRNA-1 | Indica | Japonica |           | Os12g0554500 | OsR498G1221858800.01.T02 | Mono-/di-acylglycerol lipase N-terminal                                    |
| maker-12-augustus-gene-237.38-mRNA-1 | Indica | Indica   |           | Os12g0571100 | OsR498G1221902600.01.T01 | Metallothionein-like protein 1, putative, expressed                        |
| maker-12-augustus-gene-256.0-mRNA-1  | Indica | Japonica |           | Os12g0601000 | OsR498G1222049900.01.T02 | F-box/LRR-repeat protein 17-like isoform X1                                |
| maker-12-augustus-gene-256.18-mRNA-1 | Indica | NA       |           | Os12g0601300 | OsR498G1222050600.01.T01 | Auxin-responsive protein IAA30                                             |
| maker-12-augustus-gene-256.3-mRNA-1  | Indica | NA       | NBS-TM    | Os12g0601200 | OsR498G1222050300.01.T04 | PRK domain-containing protein (Fragment)                                   |
| maker-12-augustus-gene-259.14-mRNA-1 | Indica | NA       |           | Os12g0606600 | OsR498G1222072300.01.T02 | HORMA domain containing protein, expressed                                 |
| maker-12-augustus-gene-273.36-mRNA-1 | Indica | NA       |           | Os12g0631100 | OsR498G1222155700.01.T01 | Ras-related protein RHN1                                                   |
| maker-12-augustus-gene-273.45-mRNA-1 | Indica | NA       |           | Os12g0631600 | OsR498G1222159300.01.T01 |                                                                            |
| maker-12-augustus-gene-273.47-mRNA-1 | Indica | NA       |           | Os12g0630700 | OsR498G1222154600.01.T04 | Haloacid dehalogenase-like hydrolase domain-containing protein             |
| maker-12-augustus-gene-273.52-mRNA-1 | Indica | NA       |           |              | OsR498G1222155200.01.T01 | Transcription factor JUNGBRUNNEN 1                                         |
| maker-12-augustus-gene-273.56-mRNA-1 | Indica | Japonica |           | Os12g0631800 | OsR498G1222159600.01.T01 | Putative amine oxidase, FAD/NAD(P)-binding domain-containing protein       |
| maker-12-augustus-gene-274.0-mRNA-1  | Indica | NA       |           | Os12g0632000 | OsR498G1222159700.01.T01 | Glycine rich RNA binding protein                                           |
| maker-12-augustus-gene-275.13-mRNA-1 | Indica | NA       |           | Os07g0105000 | OsR498G0713368100.01.T01 | Phytoecyanin domain-containing protein (Fragment)                          |
| maker-12-augustus-gene-275.3-mRNA-1  | Indica | NA       |           | Os08g0395500 | OsR498G0102642600.01.T02 |                                                                            |
| maker-12-augustus-gene-278.12-mRNA-1 | Indica | NA       |           |              | OsR498G0713384500.01.T01 |                                                                            |
| maker-12-augustus-gene-279.59-mRNA-1 | Indica | NA       |           | Os07g0110800 | OsR498G0713388200.01.T01 |                                                                            |
| maker-2-augustus-gene-111.39-mRNA-1  | Indica | NA       |           | Os02g0292100 |                          | GD5L-motif lipase/hydrolase-like                                           |
| maker-2-augustus-gene-167.0-mRNA-1   | Indica | Indica   |           | Os02g0478550 | OsR498G0203804900.01.T01 | 30S ribosomal protein S8, chloroplastic                                    |
| maker-2-augustus-gene-167.13-mRNA-1  | Indica | NA       |           |              |                          | Calcineurin B                                                              |
| maker-2-augustus-gene-167.15-mRNA-1  | Indica | NA       |           | Os02g0478525 |                          | Arogenate dehydratase                                                      |
| maker-2-augustus-gene-167.18-mRNA-1  | Indica | NA       |           | Os02g0479300 | OsR498G0203807200.01.T01 | dCTP pyrophosphatase 1                                                     |
| maker-2-augustus-gene-167.21-mRNA-1  | Indica | NA       |           |              |                          | WH1 domain-containing protein                                              |
| maker-2-augustus-gene-167.3-mRNA-1   | Indica | NA       |           | Os02g0478600 | OsR498G0203805100.01.T02 | 30S ribosomal protein S8, chloroplastic                                    |
| maker-2-augustus-gene-167.35-mRNA-1  | Indica | Indica   |           | Os02g0480100 | OsR498G0203808800.01.T04 | ATP-dependent DNA helicase                                                 |
| maker-2-augustus-gene-167.5-mRNA-1   | Indica | NA       |           | Os02g0478700 | OsR498G0203805300.01.T02 | 40S ribosomal protein S27                                                  |
| maker-2-augustus-gene-167.9-mRNA-1   | Indica | NA       |           |              | OsR498G0203807700.01.T02 | Calcineurin B-like protein 3                                               |
| maker-2-augustus-gene-168.16-mRNA-1  | Indica | NA       |           | Os02g0480900 | OsR498G0203811600.01.T02 | Polyadenylate-binding protein-interacting protein 3                        |
| maker-2-augustus-gene-168.21-mRNA-1  | Indica | NA       |           | Os02g0481000 | OsR498G0203812000.01.T02 | 28S ribosomal protein S34, mitochondrial (Fragment)                        |
| maker-2-augustus-gene-168.24-mRNA-1  | Indica | NA       |           |              | OsR498G0203816400.01.T04 | Putative P-loop containing nucleoside triphosphate hydrolase, alpha/Beta h |
| maker-2-augustus-gene-168.3-mRNA-1   | Indica | Indica   |           | Os02g0481900 | OsR498G0203816900.01.T01 | 5'-3' exonuclease                                                          |
| maker-2-augustus-gene-168.30-mRNA-1  | Indica | NA       |           | Os10g0199200 | OsR498G1018346900.01.T03 | Hydroxyproline-rich glycoprotein-like                                      |
| maker-2-augustus-gene-169.37-mRNA-1  | Indica | NA       |           | Os02g0482400 | OsR498G0203817800.01.T01 | Ornithine decarboxylase                                                    |
| maker-2-augustus-gene-171.20-mRNA-1  | Indica | NA       |           |              |                          |                                                                            |
| maker-2-augustus-gene-172.41-mRNA-1  | Indica | NA       |           |              | OsR498G0203833700.01.T01 | WRC domain-containing protein                                              |
| maker-2-augustus-gene-172.43-mRNA-1  | Indica | NA       |           | Os02g0488701 | OsR498G0203835200.01.T03 | RING-type E3 ubiquitin transferase                                         |
| maker-2-augustus-gene-181.2-mRNA-1   | Indica | Indica   |           | Os02g0503300 | OsR498G0203881700.01.T01 | X8 domain-containing protein                                               |
| maker-2-augustus-gene-181.7-mRNA-1   | Indica | NA       |           |              | OsR498G0203882200.01.T01 | 3-oxoacyl-[acyl-carrier-protein] reductase                                 |
| maker-2-augustus-gene-182.36-mRNA-1  | Indica | NA       |           | Os02g0503900 | OsR498G0203883100.01.T02 | Isoflavone 2'-hydroxylase                                                  |
| maker-2-augustus-gene-182.43-mRNA-1  | Indica | Indica   |           | Os02g0503900 | OsR498G0203883500.01.T01 | Isoflavone 2'-hydroxylase                                                  |
| maker-2-augustus-gene-182.49-mRNA-1  | Indica | NA       | NBS-TM    |              |                          | Disease resistance protein RGA2                                            |
| maker-2-augustus-gene-183.0-mRNA-1   | Indica | NA       |           | Os02g0504500 | OsR498G0203886100.01.T01 | UBA domain-containing protein/PUB domain-containing protein                |
| maker-2-augustus-gene-183.13-mRNA-1  | Indica | NA       |           | Os02g0504900 | OsR498G0203887600.01.T02 | F-box/kelch-repeat protein At1g67480                                       |
| maker-2-augustus-gene-183.9-mRNA-1   | Indica | NA       |           |              | OsR498G0203891300.01.T01 |                                                                            |
| maker-2-augustus-gene-185.10-mRNA-1  | Indica | NA       |           |              | OsR498G0203901200.01.T01 | Gamma carbonic anhydrase-like 2 mitochondrial                              |
| maker-2-augustus-gene-185.12-mRNA-1  | Indica | Indica   |           | Os02g0510100 | OsR498G0203903200.01.T01 | Sm domain-containing protein                                               |
| maker-2-augustus-gene-185.15-mRNA-1  | Indica | NA       |           | Os02g0510300 | OsR498G0203903800.01.T02 | Proline-rich protein HaellI subfamily 1                                    |
| maker-2-augustus-gene-185.5-mRNA-1   | Indica | NA       |           | Os02g0509600 | OsR498G0203902500.01.T01 |                                                                            |
| maker-2-augustus-gene-187.27-mRNA-1  | Indica | Indica   |           | Os02g0511400 | OsR498G0203904700.01.T01 | Cis-2,3-dihydrobiphenyl-2,3-diol dehydrogenase                             |
| maker-2-augustus-gene-187.29-mRNA-1  | Indica | NA       |           |              |                          | HTH myb-type domain-containing protein                                     |
| maker-2-augustus-gene-187.35-mRNA-1  | Indica | NA       |           | Os02g0511600 | OsR498G0203906100.01.T01 | Beta-13-N-Acetylglucosaminyltransferase family protein                     |
| maker-2-augustus-gene-187.42-mRNA-1  | Indica | Indica   |           | Os02g0511800 | OsR498G0203906400.01.T02 | NOP5NT domain-containing protein                                           |
| maker-2-augustus-gene-188.0-mRNA-1   | Indica | NA       |           | Os02g0511900 |                          | DNA polymerase epsilon catalytic subunit A                                 |
| maker-2-augustus-gene-188.7-mRNA-1   | Indica | NA       |           |              | OsR498G0203908300.01.T02 | Ribosomal pseudouridine synthase                                           |
| maker-2-augustus-gene-189.0-mRNA-1   | Indica | NA       | Kinase-TM | Os02g0513000 | OsR498G0203912300.01.T01 | Serine/threonine-protein kinase PBS1                                       |
| maker-2-augustus-gene-189.3-mRNA-1   | Indica | NA       |           |              | OsR498G0203917700.01.T01 | Glycerophosphodiester phosphodiesterase                                    |
| maker-2-augustus-gene-189.8-mRNA-1   | Indica | NA       |           | Os02g0513100 | OsR498G0203912800.01.T01 | Bidirectional sugar transporter SWEET                                      |
| maker-2-augustus-gene-190.16-mRNA-1  | Indica | NA       |           | Os02g0515600 | OsR498G0203923000.01.T01 | GSH-induced LITAF domain-containing protein                                |
| maker-2-augustus-gene-191.0-mRNA-1   | Indica | NA       |           | Os02g0517300 | OsR498G0203929500.01.T02 | Topoisomerase II-associated protein PAT1                                   |
| maker-2-augustus-gene-191.13-mRNA-1  | Indica | NA       |           | Os02g0516800 | OsR498G0203927400.01.T01 | Trihelix transcription factor ASR3                                         |

|                                      |        |          |               |              |                          |                                                                        |
|--------------------------------------|--------|----------|---------------|--------------|--------------------------|------------------------------------------------------------------------|
| maker-2-augustus-gene-191.7-mRNA-1   | Indica | NA       |               |              |                          |                                                                        |
| maker-2-augustus-gene-191.9-mRNA-1   | Indica | NA       |               | Os02g0516600 | OsR498G0203926800.01.T01 | RING finger protein 10                                                 |
| maker-2-augustus-gene-192.35-mRNA-1  | Indica | NA       |               | Os02g0517531 | OsR498G0203934500.01.T01 | RNA recognition motif domain                                           |
| maker-2-augustus-gene-192.43-mRNA-1  | Indica | NA       |               |              | OsR498G0203940900.01.T01 |                                                                        |
| maker-2-augustus-gene-192.45-mRNA-1  | Indica | NA       |               | Os02g0517600 |                          | Ubiquitinyl hydrolase 1                                                |
| maker-2-augustus-gene-192.50-mRNA-1  | Indica | NA       |               | Os02g0518100 | OsR498G0203939400.01.T01 | Probable magnesium transporter                                         |
| maker-2-augustus-gene-192.56-mRNA-1  | Indica | NA       |               | Os02g0518600 | OsR498G0203941800.01.T02 | Potassium transporter                                                  |
| maker-2-augustus-gene-193.0-mRNA-1   | Indica | NA       |               | Os02g0519900 | OsR498G0203948900.01.T06 | Tr-type G domain-containing protein                                    |
| maker-2-augustus-gene-193.1-mRNA-1   | Indica | NA       |               | Os02g0519100 | OsR498G0203945200.01.T01 | Potassium transporter                                                  |
| maker-2-augustus-gene-193.10-mRNA-1  | Indica | NA       |               | Os02g0520100 | OsR498G0203951000.01.T02 | Nudix hydrolase 13 mitochondrial                                       |
| maker-2-augustus-gene-193.3-mRNA-1   | Indica | Indica   |               | Os04g0661300 | OsR498G0203946800.01.T01 | Myosin-H heavy chain isoform 1                                         |
| maker-2-augustus-gene-196.18-mRNA-1  | Indica | Indica   |               | Os02g0526000 | OsR498G0203972200.01.T01 | Heparan-alpha-glucosaminide N-acetyltransferase-like isoform X1        |
| maker-2-augustus-gene-196.5-mRNA-1   | Indica | NA       |               | Os02g0525900 | OsR498G0203971900.01.T01 | Acetyl-coenzyme A synthetase                                           |
| maker-2-augustus-gene-203.0-mRNA-1   | Indica | NA       |               |              | OsR498G0204016900.01.T01 | Chaperone protein ClpB1-like                                           |
| maker-2-augustus-gene-203.4-mRNA-1   | Indica | NA       |               | Os02g0537700 | OsR498G0204017500.01.T01 | Thioredoxin peroxidase                                                 |
| maker-2-augustus-gene-203.8-mRNA-1   | Indica | Japonica |               | Os02g0537800 | OsR498G0204018500.01.T01 | Butenolide signaling repressing protein-like                           |
| maker-2-augustus-gene-204.22-mRNA-1  | Indica | NA       |               | Os02g0538900 | OsR498G0204022400.01.T01 | Basic leucine zipper 6                                                 |
| maker-2-augustus-gene-208.0-mRNA-1   | Indica | Indica   |               | Os02g0816900 | OsR498G0204065700.01.T01 | Myosin motor domain-containing protein                                 |
| maker-2-augustus-gene-208.6-mRNA-1   | Indica | NA       |               | Os02g0545300 |                          | ATP synthase subunit-like protein                                      |
| maker-2-augustus-gene-230.62-mRNA-1  | Indica | NA       |               | Os02g0587300 |                          |                                                                        |
| maker-2-augustus-gene-230.64-mRNA-1  | Indica | NA       |               | Os02g0587600 | OsR498G0204199700.01.T01 | Xylan 14-beta-xylosidase                                               |
| maker-2-augustus-gene-237.126-mRNA-1 | Indica | NA       |               | Os02g0600400 | OsR498G0204248100.01.T05 | Glucose-6-phosphate dehydrogenase (NADP(+))                            |
| maker-2-augustus-gene-237.139-mRNA-1 | Indica | NA       |               | Os02g0600200 | OsR498G0204248000.01.T03 | Ribosome-recycling factor, mitochondrial (Fragment)                    |
| maker-2-augustus-gene-237.48-mRNA-1  | Indica | NA       |               |              |                          | Protein-serine/threonine phosphatase                                   |
| maker-2-augustus-gene-237.49-mRNA-1  | Indica | NA       |               |              |                          | Protein-serine/threonine phosphatase                                   |
| maker-2-augustus-gene-24.37-mRNA-1   | Indica | NA       |               | Os02g0143200 | OsR498G0202953500.01.T02 | ARM repeat superfamily protein                                         |
| maker-2-augustus-gene-244.34-mRNA-1  | Indica | NA       |               | Os02g0614100 | OsR498G0204296700.01.T01 | TPT domain-containing protein (Fragment)                               |
| maker-2-augustus-gene-244.39-mRNA-1  | Indica | NA       |               |              | OsR498G0204297900.01.T02 | AP2-like ethylene-responsive transcription factor BBM2                 |
| maker-2-augustus-gene-244.43-mRNA-1  | Indica | NA       |               | Os02g0614400 | OsR498G0204298500.01.T02 | Calcium-dependent protein kinase 20                                    |
| maker-2-augustus-gene-244.54-mRNA-1  | Indica | NA       |               | Os02g0614200 | OsR498G0204297200.01.T01 | Lysine-specific demethylase 2A-like                                    |
| maker-2-augustus-gene-245.0-mRNA-1   | Indica | NA       |               | Os02g0614600 | OsR498G0204299100.01.T02 | Filament-like plant protein 7                                          |
| maker-2-augustus-gene-245.16-mRNA-1  | Indica | NA       |               | Os02g0614500 | OsR498G0204298800.01.T01 | Nucleotide sugar transporter-KT 1                                      |
| maker-2-augustus-gene-245.21-mRNA-1  | Indica | Japonica |               | Os02g0614700 | OsR498G0204299400.01.T01 | SPRY domain-containing protein                                         |
| maker-2-augustus-gene-247.10-mRNA-1  | Indica | NA       |               |              | OsR498G0204310000.01.T03 |                                                                        |
| maker-2-augustus-gene-247.3-mRNA-1   | Indica | NA       | LRR-TM        |              | OsR498G0204309100.01.T01 | LRR receptor-like serine/threonine-protein kinase EFR                  |
| maker-2-augustus-gene-251.19-mRNA-1  | Indica | NA       |               |              |                          |                                                                        |
| maker-2-augustus-gene-252.27-mRNA-1  | Indica | NA       |               | Os02g0616501 |                          | PAZ domain-containing protein/Piwi domain-containing protein/DUF1785 d |
| maker-2-augustus-gene-253.8-mRNA-1   | Indica | NA       |               | Os02g0617900 | OsR498G0204327100.01.T01 | 39S ribosomal protein L41-A, mitochondrial                             |
| maker-2-augustus-gene-255.57-mRNA-1  | Indica | Indica   |               | Os04g0515900 | OsR498G0204341900.01.T01 | NAC transcription factor                                               |
| maker-2-augustus-gene-258.5-mRNA-1   | Indica | NA       |               | Os01g0281200 | OsR498G0100675400.01.T01 | CYCLIN domain-containing protein (Fragment)                            |
| maker-2-augustus-gene-259.54-mRNA-1  | Indica | NA       |               | Os02g0629800 | OsR498G0204365900.01.T01 | Knot1 domain-containing protein (Fragment)                             |
| maker-2-augustus-gene-26.37-mRNA-1   | Indica | NA       |               | Os02g0145600 | OsR498G0202963300.01.T06 | NB-ARC domain-containing protein                                       |
| maker-2-augustus-gene-26.40-mRNA-1   | Indica | NA       |               |              | OsR498G0202966500.01.T04 | Dolichol kinase                                                        |
| maker-2-augustus-gene-26.47-mRNA-1   | Indica | NA       |               | Os02g0146600 | OsR498G0202966700.01.T02 | Translation initiation factor                                          |
| maker-2-augustus-gene-26.49-mRNA-1   | Indica | NA       |               | Os02g0146700 | OsR498G0202967300.01.T01 | 26S proteasome non-ATPase regulatory subunit 2 A                       |
| maker-2-augustus-gene-26.56-mRNA-1   | Indica | NA       |               | Os02g0147700 | OsR498G0202969700.01.T02 | DNA-binding protein BIN4-like isoform X1                               |
| maker-2-augustus-gene-26.65-mRNA-1   | Indica | NA       |               |              | OsR498G0202966200.01.T01 |                                                                        |
| maker-2-augustus-gene-26.67-mRNA-1   | Indica | NA       |               |              | OsR498G0202966500.01.T04 | Dolichol kinase                                                        |
| maker-2-augustus-gene-26.74-mRNA-1   | Indica | Japonica |               | Os02g0147300 | OsR498G0202968200.01.T02 | TOG domain-containing protein                                          |
| maker-2-augustus-gene-260.6-mRNA-1   | Indica | Japonica | Kinase-TM     | Os02g0632100 | OsR498G0509684800.01.T02 | Wall-associated receptor kinase 3                                      |
| maker-2-augustus-gene-262.0-mRNA-1   | Indica | Indica   |               | Os04g0524600 | OsR498G0204380300.01.T01 | Metal-nicotianamine transporter YSL12                                  |
| maker-2-augustus-gene-262.30-mRNA-1  | Indica | NA       | Kinase-TM     |              |                          | Wall-associated receptor kinase 4                                      |
| maker-2-augustus-gene-262.38-mRNA-1  | Indica | NA       |               |              |                          | B-block binding subunit of TFIIC                                       |
| maker-2-augustus-gene-27.0-mRNA-1    | Indica | NA       |               | Os02g0147500 |                          | Resistance protein-like                                                |
| maker-2-augustus-gene-30.0-mRNA-1    | Indica | NA       |               |              |                          | DUF547 domain-containing protein                                       |
| maker-2-augustus-gene-30.16-mRNA-1   | Indica | NA       |               | Os02g0152900 | OsR498G0202988400.01.T01 | Putative WAS/WASL-interacting protein family member 1-like             |
| maker-2-augustus-gene-30.20-mRNA-1   | Indica | Indica   | Kinase-LRR-TM | Os02g0154000 | OsR498G0202991600.01.T01 | Putative leucine-rich repeat receptor-like kinase                      |
| maker-2-augustus-gene-31.54-mRNA-1   | Indica | NA       | Kinase-TM     |              | OsR498G0202996100.01.T01 | L-type lectin-domain containing receptor kinase IX.2                   |
| maker-2-augustus-gene-32.53-mRNA-1   | Indica | NA       |               | Os02g0158300 | OsR498G0203004900.01.T01 | Arabinose 5-phosphate isomerase KdsD                                   |
| maker-2-augustus-gene-32.58-mRNA-1   | Indica | NA       |               | Os02g0158900 | OsR498G0203006100.01.T01 | 5'-AMP-activated protein kinase subunit gamma-3                        |
| maker-2-augustus-gene-32.60-mRNA-1   | Indica | NA       |               | Os02g0159200 | OsR498G0203007700.01.T01 | Regulator of Vps4 activity in the MVB pathway protein                  |

|                                    |        |          |               |              |                          |                                                         |
|------------------------------------|--------|----------|---------------|--------------|--------------------------|---------------------------------------------------------|
| maker-2-augustus-gene-32.64-mRNA-1 | Indica | NA       |               |              | OsR498G0203008100.01.T01 | translation machinery-associated protein 7-like         |
| maker-2-augustus-gene-32.66-mRNA-1 | Indica | Indica   |               | Os01g0141100 | OsR498G0203008900.01.T01 | Protein SUPPRESSOR OF K(+) TRANSPORT GROWTH DEFECT 1    |
| maker-2-augustus-gene-32.73-mRNA-1 | Indica | NA       |               | Os02g0158100 | OsR498G0203003800.01.T01 | EH domain-containing protein 1                          |
| maker-2-augustus-gene-32.77-mRNA-1 | Indica | NA       |               |              |                          | single-stranded DNA-binding protein WHY2, mitochondrial |
| maker-2-augustus-gene-32.82-mRNA-1 | Indica | Indica   |               | Os02g0158500 | OsR498G0203005400.01.T01 | Plant-specific domain TIGR01627 family protein          |
| maker-2-augustus-gene-32.86-mRNA-1 | Indica | NA       |               |              | OsR498G0203008400.01.T01 |                                                         |
| maker-2-augustus-gene-32.91-mRNA-1 | Indica | Indica   |               | Os02g0159700 | OsR498G0203008600.01.T04 | Protein SCO1 homolog 1 mitochondrial                    |
| maker-2-augustus-gene-33.0-mRNA-1  | Indica | Japonica |               | Os02g0160100 | OsR498G0203010500.01.T01 |                                                         |
| maker-2-augustus-gene-33.3-mRNA-1  | Indica | NA       |               | Os02g0160200 | OsR498G0203010900.01.T01 | FBD domain-containing protein                           |
| maker-2-augustus-gene-33.5-mRNA-1  | Indica | NA       |               | Os02g0161100 | OsR498G0203015300.01.T01 | Formin-like protein 10                                  |
| maker-2-augustus-gene-33.7-mRNA-1  | Indica | NA       |               |              | OsR498G0203009200.01.T03 | DEXH-box ATP-dependent RNA helicase DExH11              |
| maker-2-augustus-gene-34.35-mRNA-1 | Indica | NA       |               |              |                          | Zinc finger CCH domain-containing protein 13            |
| maker-2-augustus-gene-34.40-mRNA-1 | Indica | NA       |               |              | OsR498G0203016300.01.T01 | TATA-binding protein-associated factor BTA1             |
| maker-2-augustus-gene-37.13-mRNA-1 | Indica | NA       |               | Os02g0168300 | OsR498G0203044700.01.T01 | Glutathione transferase                                 |
| maker-2-augustus-gene-37.15-mRNA-1 | Indica | NA       |               |              | OsR498G0203044900.01.T01 | Putative E3 ubiquitin-protein ligase LIN                |
| maker-2-augustus-gene-37.41-mRNA-1 | Indica | NA       |               | Os02g0168200 | OsR498G0203044600.01.T01 | probable transcription factor KAN3                      |
| maker-2-augustus-gene-38.0-mRNA-1  | Indica | NA       |               | Os02g0168800 | OsR498G0203046700.01.T01 | Hydroxymethylbilane synthase                            |
| maker-2-augustus-gene-38.10-mRNA-1 | Indica | NA       |               |              | OsR498G0203052900.01.T02 | Glycine cleavage system protein GcvH                    |
| maker-2-augustus-gene-38.14-mRNA-1 | Indica | NA       |               | Os02g0167700 | OsR498G0203043400.01.T03 | Cullin-associated NEDD8-dissociated protein 1           |
| maker-2-augustus-gene-38.23-mRNA-1 | Indica | Indica   |               | Os02g0170000 | OsR498G0203053700.01.T02 | Pentatricopeptide repeat                                |
| maker-2-augustus-gene-38.28-mRNA-1 | Indica | NA       |               | Os02g0168600 | OsR498G0203046000.01.T03 | OTU domain-containing protein                           |
| maker-2-augustus-gene-38.31-mRNA-1 | Indica | NA       |               | Os02g0168700 | OsR498G0203046400.01.T01 | Peptidylprolyl isomerase                                |
| maker-2-augustus-gene-38.33-mRNA-1 | Indica | NA       |               | Os02g0168900 | OsR498G0203047200.01.T01 | Ribonuclease H2 subunit C                               |
| maker-2-augustus-gene-38.39-mRNA-1 | Indica | NA       |               |              | OsR498G0203051200.01.T03 | Piwi domain-containing protein                          |
| maker-2-augustus-gene-38.4-mRNA-1  | Indica | NA       |               | Os02g0169300 | OsR498G0203048100.01.T02 | Phosphoglycerate kinase                                 |
| maker-2-augustus-gene-38.45-mRNA-1 | Indica | NA       |               | Os02g0169900 | OsR498G0203053600.01.T04 | Pentatricopeptide repeat-containing protein             |
| maker-2-augustus-gene-38.8-mRNA-1  | Indica | NA       |               |              | OsR498G0203051500.01.T01 |                                                         |
| maker-2-augustus-gene-41.11-mRNA-1 | Indica | NA       |               | Os02g0174300 | OsR498G0203068700.01.T01 | Trihelix transcription factor ASR3                      |
| maker-2-augustus-gene-41.14-mRNA-1 | Indica | NA       | Kinase-LRR-TM |              | OsR498G0203068900.01.T01 | Pollen receptor-like kinase                             |
| maker-2-augustus-gene-41.37-mRNA-1 | Indica | NA       | Kinase-TM     | Os02g0174200 | OsR498G0203068200.01.T01 | serine/threonine-protein kinase STY13                   |
| maker-2-augustus-gene-41.7-mRNA-1  | Indica | NA       |               | Os02g0174100 | OsR498G0203067900.01.T02 | SBP-type domain-containing protein                      |
| maker-2-augustus-gene-44.13-mRNA-1 | Indica | NA       |               | Os02g0179500 | OsR498G0203089700.01.T03 | Heptahelical transmembrane protein 2                    |
| maker-2-augustus-gene-44.18-mRNA-1 | Indica | NA       |               | Os02g0179200 | OsR498G0203088200.01.T01 | Gamma-glutamyl peptidase                                |
| maker-2-augustus-gene-44.2-mRNA-1  | Indica | NA       | CC-Kinase     |              | OsR498G0203087100.01.T01 | Mitogen-activated protein kinase kinase kinase ANP1     |
| maker-2-augustus-gene-44.20-mRNA-1 | Indica | NA       |               |              | OsR498G0203089400.01.T01 | TUB transcription factor                                |
| maker-2-augustus-gene-44.24-mRNA-1 | Indica | Indica   |               | Os02g0179800 | OsR498G0203090200.01.T01 | ATG11 domain-containing protein                         |
| maker-2-augustus-gene-44.5-mRNA-1  | Indica | NA       |               | Os02g0179100 | OsR498G0203087700.01.T04 | 5'-deoxynucleotidase                                    |
| maker-2-augustus-gene-45.21-mRNA-1 | Indica | NA       |               |              | OsR498G0203090500.01.T01 | U2 snRNP-associated SURP motif-containing protein       |
| maker-2-augustus-gene-45.28-mRNA-1 | Indica | NA       |               | Os02g0180000 | OsR498G0203090900.01.T02 | Protein-serine/threonine phosphatase                    |
| maker-2-augustus-gene-45.37-mRNA-1 | Indica | NA       |               |              | OsR498G0203092100.01.T01 | probable N-acetyltransferase HLS1                       |
| maker-2-augustus-gene-45.39-mRNA-1 | Indica | NA       |               | Os02g0180700 | OsR498G0203093300.01.T01 | Nucleoside-diphosphate-sugar epimerase                  |
| maker-2-augustus-gene-45.44-mRNA-1 | Indica | NA       |               | Os02g0180100 | OsR498G0203091200.01.T03 | Ubiquitin carboxyl-terminal hydrolase                   |
| maker-2-augustus-gene-45.48-mRNA-1 | Indica | NA       |               | Os02g0180500 | OsR498G0203092800.01.T01 | Chorismate mutase                                       |
| maker-2-augustus-gene-46.34-mRNA-1 | Indica | NA       |               | Os02g0182700 | OsR498G0203102700.01.T01 |                                                         |
| maker-2-augustus-gene-46.38-mRNA-1 | Indica | Indica   |               | Os02g0182800 | OsR498G0203103100.01.T02 | Knotted 7                                               |
| maker-2-augustus-gene-46.44-mRNA-1 | Indica | NA       |               | Os02g0182100 | OsR498G0203099000.01.T01 | Two-component response regulator                        |
| maker-2-augustus-gene-46.47-mRNA-1 | Indica | Indica   |               | Os06g0643100 | OsR498G0203101400.01.T01 | Proteasome endopeptidase complex                        |
| maker-2-augustus-gene-46.50-mRNA-1 | Indica | NA       | Kinase-TM     |              | OsR498G0203101600.01.T02 | Phytosulfokine receptor                                 |
| maker-2-augustus-gene-47.36-mRNA-1 | Indica | NA       |               | Os02g0184100 | OsR498G0203106300.01.T01 | Putative prostatic spermine-binding protein (Fragment)  |
| maker-2-augustus-gene-47.38-mRNA-1 | Indica | NA       |               | Os02g0184400 | OsR498G0203107300.01.T02 | UDP-glucose-fructose-phosphate glucosyltransferase      |
| maker-2-augustus-gene-47.44-mRNA-1 | Indica | Indica   |               | Os02g0184500 | OsR498G0203107900.01.T01 | Ubiquitin system component Cue protein                  |
| maker-2-augustus-gene-47.47-mRNA-1 | Indica | NA       |               | Os02g0183000 | OsR498G0203104200.01.T01 | PLATZ transcription factor (Fragment)                   |
| maker-2-augustus-gene-47.49-mRNA-1 | Indica | NA       |               | Os02g0183700 |                          | Isoleucyl-tRNA synthetase                               |
| maker-2-augustus-gene-47.58-mRNA-1 | Indica | Indica   |               | Os02g0183900 | OsR498G0203106000.01.T01 | Isoleucyl-tRNA synthetase                               |
| maker-2-augustus-gene-47.61-mRNA-1 | Indica | NA       |               | Os02g0184000 | OsR498G0203106200.01.T03 | S-acyltransferase                                       |
| maker-2-augustus-gene-47.66-mRNA-1 | Indica | Indica   |               | Os06g0644200 | OsR498G0203106600.01.T02 | H(+)-exporting diphosphatase                            |
| maker-2-augustus-gene-47.72-mRNA-1 | Indica | Japonica |               | Os02g0184600 | OsR498G0203112700.01.T01 | Premnaspirodiene oxygenase                              |
| maker-2-augustus-gene-47.74-mRNA-1 | Indica | NA       |               | Os02g0184700 | OsR498G0203108600.01.T01 | Premnaspirodiene oxygenase                              |
| maker-2-augustus-gene-48.49-mRNA-1 | Indica | NA       |               | Os02g0185200 | OsR498G0203111900.01.T01 | Premnaspirodiene oxygenase                              |
| maker-2-augustus-gene-48.54-mRNA-1 | Indica | Indica   |               | Os02g0184900 | OsR498G0203112900.01.T02 | Premnaspirodiene oxygenase-like                         |
| maker-2-augustus-gene-48.57-mRNA-1 | Indica | Indica   |               | Os02g0185500 | OsR498G0203113300.01.T01 | Premnaspirodiene oxygenase                              |



|                                     |        |          |               |              |                          |                                                                                 |
|-------------------------------------|--------|----------|---------------|--------------|--------------------------|---------------------------------------------------------------------------------|
| maker-2-augustus-gene-48.59-mRNA-1  | Indica | Indica   |               | Os02g0186100 | OsR498G0203113700.01.T01 | Premnaspirodiene oxygenase                                                      |
| maker-2-augustus-gene-48.62-mRNA-1  | Indica | Indica   |               | Os02g0184700 | OsR498G0203113900.01.T01 | Premnaspirodiene oxygenase                                                      |
| maker-2-augustus-gene-49.32-mRNA-1  | Indica | Indica   |               | Os02g0186700 | OsR498G0203116700.01.T02 |                                                                                 |
| maker-2-augustus-gene-49.35-mRNA-1  | Indica | NA       |               | Os02g0186800 | OsR498G0203116900.01.T01 | Premnaspirodiene oxygenase                                                      |
| maker-2-augustus-gene-49.37-mRNA-1  | Indica | Indica   |               | Os02g0186900 | OsR498G0203117100.01.T01 | Premnaspirodiene oxygenase                                                      |
| maker-2-augustus-gene-49.39-mRNA-1  | Indica | NA       |               | Os02g0187000 | OsR498G0203117300.01.T01 | Premnaspirodiene oxygenase                                                      |
| maker-2-augustus-gene-49.45-mRNA-1  | Indica | NA       |               | Os02g0187600 | OsR498G0203119500.01.T01 | Protein TIC 21, chloroplastic isoform A                                         |
| maker-2-augustus-gene-49.48-mRNA-1  | Indica | NA       |               | Os02g0187200 | OsR498G0203118200.01.T01 | Exostosin domain-containing protein (Fragment)                                  |
| maker-2-augustus-gene-49.53-mRNA-1  | Indica | NA       |               |              | OsR498G0203118400.01.T03 | SNARE associated Golgi protein family                                           |
| maker-2-augustus-gene-49.60-mRNA-1  | Indica | NA       |               | Os02g0187500 | OsR498G0203119400.01.T01 | Putative thiamine phosphate synthase                                            |
| maker-2-augustus-gene-49.74-mRNA-1  | Indica | NA       |               | Os02g0188500 | OsR498G0203124200.01.T01 | UDPGT domain-containing protein                                                 |
| maker-2-augustus-gene-50.36-mRNA-1  | Indica | NA       |               | Os02g0188900 |                          | F-box domain containing protein, expressed                                      |
| maker-2-augustus-gene-50.38-mRNA-1  | Indica | NA       |               | Os02g0189300 | OsR498G0203127100.01.T02 | GDSL esterase/lipase                                                            |
| maker-2-augustus-gene-50.43-mRNA-1  | Indica | NA       |               | Os02g0189000 | OsR498G0203126400.01.T01 | 30S ribosomal protein S21, chloroplastic                                        |
| maker-2-augustus-gene-55.37-mRNA-1  | Indica | Indica   |               | Os02g0197200 | OsR498G0203154300.01.T02 | Endoglucanase                                                                   |
| maker-2-augustus-gene-55.50-mRNA-1  | Indica | Indica   |               | Os02g0198200 | OsR498G0203158500.01.T02 | probable calcium-binding protein CML21                                          |
| maker-2-augustus-gene-55.54-mRNA-1  | Indica | NA       |               | Os02g0198300 | OsR498G0203158700.01.T04 | ADP-ribosylation factor GTPase-activating protein AGD12                         |
| maker-2-augustus-gene-55.62-mRNA-1  | Indica | NA       |               | Os02g0196900 | OsR498G0203153400.01.T01 | 3-oxoacyl-acyl-carrier-protein synthase                                         |
| maker-2-augustus-gene-55.77-mRNA-1  | Indica | NA       |               | Os02g0197700 | OsR498G0203156800.01.T01 | Ditrans,polycis-polyprenyl diphosphate synthase ((2E,6E)-farnesyl)diphosphatase |
| maker-2-augustus-gene-55.81-mRNA-1  | Indica | Indica   |               | Os02g0197800 | OsR498G0203157400.01.T02 | DUF971 domain-containing protein (Fragment)                                     |
| maker-2-augustus-gene-56.0-mRNA-1   | Indica | NA       |               | Os02g0198600 | OsR498G0203160100.01.T05 | DNA damage-inducible protein 1                                                  |
| maker-2-augustus-gene-56.16-mRNA-1  | Indica | NA       |               |              | OsR498G0203159400.01.T02 |                                                                                 |
| maker-2-augustus-gene-56.19-mRNA-1  | Indica | NA       |               | Os02g0198700 | OsR498G0203160400.01.T01 | Subtilisin-like serine protease                                                 |
| maker-2-augustus-gene-66.67-mRNA-1  | Indica | Indica   |               | Os03g0233200 | OsR498G0202837900.01.T01 | Putative lecithin-cholesterol acyl transferase                                  |
| maker-2-augustus-gene-73.19-mRNA-1  | Indica | NA       |               | Os01g0265300 |                          | Transposable element protein, putative, MuDR                                    |
| maker-2-augustus-gene-98.13-mRNA-1  | Indica | NA       |               | Os04g0120000 |                          | Hydroxyproline-rich glycoprotein-like                                           |
| maker-3-augustus-gene-173.41-mRNA-1 | Indica | Indica   |               | Os03g0359000 | OsR498G0305987400.01.T01 | Alpha/beta-Hydrolases superfamily protein                                       |
| maker-3-augustus-gene-180.13-mRNA-1 | Indica | NA       |               |              | OsR498G0306020300.01.T01 | NYN domain-containing protein (Fragment)                                        |
| maker-3-augustus-gene-186.0-mRNA-1  | Indica | NA       |               | Os03g0380600 |                          | Transposon protein, putative, CACTA, En/Spm sub-class                           |
| maker-3-augustus-gene-192.7-mRNA-1  | Indica | Indica   |               | Os07g0620800 | OsR498G0306091200.01.T02 | Cyclin dependent kinase regulator                                               |
| maker-3-augustus-gene-195.10-mRNA-1 | Indica | NA       |               | Os03g0395300 |                          | Protein WEAK CHLOROPLAST MOVEMENT UNDER BLUE LIGHT 1                            |
| maker-3-augustus-gene-196.33-mRNA-1 | Indica | NA       |               |              | OsR498G0306106700.01.T02 | Switch-associated protein 70                                                    |
| maker-3-augustus-gene-196.39-mRNA-1 | Indica | NA       |               |              | OsR498G0306108700.01.T05 | Suppressor of white apricot N-terminal domain                                   |
| maker-3-augustus-gene-196.44-mRNA-1 | Indica | Japonica |               | Os03g0396900 | OsR498G0306112500.01.T01 | Trimethylguanosine synthase                                                     |
| maker-3-augustus-gene-196.49-mRNA-1 | Indica | Indica   |               | Os03g0397300 | OsR498G0306113300.01.T02 | Metallophos domain-containing protein (Fragment)                                |
| maker-3-augustus-gene-196.54-mRNA-1 | Indica | NA       |               | Os03g0396500 | OsR498G0306111400.01.T01 | Tify domain-containing protein                                                  |
| maker-3-augustus-gene-197.30-mRNA-1 | Indica | NA       |               | Os03g0397400 | OsR498G0306113700.01.T04 | Vacuolar cation/proton exchanger                                                |
| maker-3-augustus-gene-197.33-mRNA-1 | Indica | Indica   | Kinase-LRR-TM | Os07g0618400 | OsR498G0306114400.01.T02 | Protein STRUBBELIG-RECEPTOR FAMILY 6                                            |
| maker-3-augustus-gene-198.4-mRNA-1  | Indica | NA       |               |              | OsR498G0306123200.01.T01 | 1-phosphatidylinositol-3-phosphate 5-kinase                                     |
| maker-3-augustus-gene-199.0-mRNA-1  | Indica | NA       | Kinase        |              | OsR498G0306131300.01.T02 | Serine/threonine-protein kinase CTR1                                            |
| maker-3-augustus-gene-199.10-mRNA-1 | Indica | NA       | LRR-TM        | Os03g0400850 | OsR498G0306129200.01.T01 | Putative LRR receptor-like serine/threonine-protein kinase                      |
| maker-3-augustus-gene-199.12-mRNA-1 | Indica | NA       |               | Os03g0401300 | OsR498G0306132000.01.T03 | Sucrose synthase                                                                |
| maker-3-augustus-gene-199.5-mRNA-1  | Indica | NA       |               | Os03g0400700 |                          | Late embryogenesis abundant protein                                             |
| maker-3-augustus-gene-279.10-mRNA-1 | Indica | NA       |               |              | OsR498G1018671500.01.T01 | BAH domain-containing protein                                                   |
| maker-3-augustus-gene-279.2-mRNA-1  | Indica | NA       |               | Os10g0404900 | OsR498G1018674900.01.T01 | Homeobox-leucine zipper protein ATHB-23                                         |
| maker-3-augustus-gene-279.4-mRNA-1  | Indica | NA       |               | Os02g0452800 |                          | Epimerase domain-containing protein                                             |
| maker-3-augustus-gene-279.5-mRNA-1  | Indica | NA       |               | Os10g0404500 | OsR498G1018673700.01.T01 | Sucrose transporter                                                             |
| maker-3-augustus-gene-279.7-mRNA-1  | Indica | Indica   |               | Os03g0171300 | OsR498G1018672900.01.T01 | Transcription factor ILI7                                                       |
| maker-3-augustus-gene-279.9-mRNA-1  | Indica | NA       |               |              | OsR498G1018671700.01.T01 | BAH domain-containing protein                                                   |
| maker-3-augustus-gene-280.23-mRNA-1 | Indica | Indica   |               | Os03g0171700 | OsR498G1018669400.01.T01 | Transcription factor ILI3                                                       |
| maker-3-augustus-gene-280.25-mRNA-1 | Indica | NA       |               | Os10g0403000 | OsR498G1018666000.01.T01 | Cytochrome P450, family 78, subfamily A, polypeptide 7                          |
| maker-3-augustus-gene-280.27-mRNA-1 | Indica | NA       |               |              | OsR498G1018668900.01.T02 | Glucose-fructose oxidoreductase, bacterial                                      |
| maker-3-augustus-gene-281.20-mRNA-1 | Indica | NA       |               | Os10g0400900 | OsR498G1018659900.01.T02 | Mic1 domain-containing protein (Fragment)                                       |
| maker-3-augustus-gene-281.4-mRNA-1  | Indica | NA       |               | Os10g0400800 | OsR498G1018659800.01.T01 | Phenylalanine--tRNA ligase alpha subunit, cytoplasmic                           |
| maker-3-augustus-gene-282.33-mRNA-1 | Indica | NA       |               | Os10g0400200 | OsR498G1018658200.01.T01 | Glutelin type-A 2                                                               |
| maker-3-augustus-gene-282.35-mRNA-1 | Indica | NA       |               | Os10g0399200 | OsR498G1018655600.01.T01 | Putative O-succinylhomoserine (Thiol)-lyase                                     |
| maker-3-augustus-gene-282.37-mRNA-1 | Indica | NA       |               | Os10g0400100 | OsR498G1018657900.01.T01 | Methionyl-tRNA synthetase                                                       |
| maker-3-augustus-gene-282.42-mRNA-1 | Indica | NA       |               | Os10g0399700 | OsR498G1018656500.01.T01 | Putative O-succinylhomoserine (Thiol)-lyase                                     |
| maker-3-augustus-gene-283.5-mRNA-1  | Indica | NA       |               |              | OsR498G1018652100.01.T01 | CCAAT-binding transcription factor B                                            |
| maker-3-augustus-gene-297.11-mRNA-1 | Indica | NA       |               |              | OsR498G1018579600.01.T01 |                                                                                 |
| maker-3-augustus-gene-297.15-mRNA-1 | Indica | NA       |               |              |                          |                                                                                 |

|                                     |        |          |               |              |                          |                                                                          |
|-------------------------------------|--------|----------|---------------|--------------|--------------------------|--------------------------------------------------------------------------|
| maker-3-augustus-gene-297.17-mRNA-1 | Indica | NA       |               | Os10g0376900 | OsR498G1018581100.01.T01 | Transcription factor bHLH96                                              |
| maker-3-augustus-gene-298.34-mRNA-1 | Indica | NA       | LRR-TM        | Os10g0376200 | OsR498G1018578500.01.T02 | Dynein assembly factor 1, axonemal                                       |
| maker-3-augustus-gene-298.38-mRNA-1 | Indica | Indica   |               | Os03g0388800 | OsR498G1018576700.01.T01 | 2-hydroxy-6-oxononadienedioate/2-hydroxy-6-oxononatrienedioate hydrolase |
| maker-3-augustus-gene-298.41-mRNA-1 | Indica | NA       |               | Os10g0375600 | OsR498G1018576500.01.T03 | Calmodulin-binding transcription activator 2                             |
| maker-3-augustus-gene-298.46-mRNA-1 | Indica | NA       | Kinase-LRR-TM | Os10g0375000 | OsR498G1018574700.01.T03 | Putative receptor like protein kinase                                    |
| maker-3-augustus-gene-299.35-mRNA-1 | Indica | NA       |               |              |                          |                                                                          |
| maker-3-augustus-gene-299.40-mRNA-1 | Indica | NA       |               | Os10g0372800 |                          | NAC domain-containing protein                                            |
| maker-3-augustus-gene-299.43-mRNA-1 | Indica | NA       | Kinase-LRR-TM | Os10g0374666 | OsR498G1018573900.01.T01 | LRR receptor-like serine/threonine-protein kinase EFR isoform B          |
| maker-3-augustus-gene-299.46-mRNA-1 | Indica | NA       |               | Os10g0373400 |                          |                                                                          |
| maker-3-augustus-gene-299.48-mRNA-1 | Indica | NA       |               |              | OsR498G1018569700.01.T01 |                                                                          |
| maker-3-augustus-gene-299.50-mRNA-1 | Indica | NA       |               |              | OsR498G1018568500.01.T01 |                                                                          |
| maker-3-augustus-gene-301.25-mRNA-1 | Indica | NA       | NBS-TM        | Os10g0370100 |                          | calmodulin-binding transcription activator 3                             |
| maker-3-augustus-gene-302.26-mRNA-1 | Indica | NA       |               | Os10g0368400 | OsR498G1018555200.01.T01 | AP complex subunit sigma                                                 |
| maker-3-augustus-gene-303.30-mRNA-1 | Indica | NA       |               | Os10g0528300 | OsR498G1018554900.01.T02 | Glutathione S-transferase                                                |
| maker-3-augustus-gene-304.0-mRNA-1  | Indica | NA       |               |              | OsR498G1018550000.01.T01 | C2 NT-type domain-containing protein (Fragment)                          |
| maker-3-augustus-gene-304.12-mRNA-1 | Indica | NA       |               |              | OsR498G1018551500.01.T01 | Protein translocase/ protein transporter                                 |
| maker-3-augustus-gene-304.14-mRNA-1 | Indica | NA       | NBS-TM        |              | OsR498G1018551100.01.T01 | NB-ARC domain containing protein, expressed                              |
| maker-3-augustus-gene-305.24-mRNA-1 | Indica | NA       |               | Os10g0363500 | OsR498G1018548900.01.T02 | Pentatricopeptide repeat-containing protein mitochondrial                |
| maker-3-augustus-gene-305.25-mRNA-1 | Indica | NA       |               |              | OsR498G1018548100.01.T01 | Acetyl-CoA carboxylase                                                   |
| maker-3-augustus-gene-305.32-mRNA-1 | Indica | NA       |               | Os10g0363100 | OsR498G1018546700.01.T07 | Hexosyltransferase                                                       |
| maker-3-augustus-gene-307.0-mRNA-1  | Indica | NA       |               | Os10g0360900 | OsR498G1018535600.01.T03 |                                                                          |
| maker-3-augustus-gene-307.8-mRNA-1  | Indica | NA       | Kinase-LRR-TM | Os10g0360933 | OsR498G1018534900.01.T01 | Putative LRR receptor-like serine/threonine-protein kinase               |
| maker-3-augustus-gene-308.0-mRNA-1  | Indica | NA       |               | Os10g0359500 | OsR498G1018531800.01.T03 | NAC domain-containing protein 68                                         |
| maker-3-augustus-gene-309.0-mRNA-1  | Indica | NA       |               | Os10g0357800 | OsR498G1018526700.01.T05 | N(2),N(2)-dimethylguanosine tRNA methyltransferase 1                     |
| maker-3-augustus-gene-310.24-mRNA-1 | Indica | NA       |               | Os10g0351600 | OsR498G1018523300.01.T01 | GH10 domain-containing protein (Fragment)                                |
| maker-3-augustus-gene-311.0-mRNA-1  | Indica | NA       |               | Os10g0351300 | OsR498G1018520800.01.T01 | Cytochrome P450 family 76 subfamily C polypeptide 7                      |
| maker-3-augustus-gene-311.4-mRNA-1  | Indica | NA       |               | Os10g0350400 |                          | Ribosomal protein S12 containing protein                                 |
| maker-3-augustus-gene-311.9-mRNA-1  | Indica | NA       |               |              | OsR498G1018520500.01.T02 |                                                                          |
| maker-3-augustus-gene-313.30-mRNA-1 | Indica | NA       |               | Os10g0347800 | OsR498G1018515600.01.T01 | Formin-like protein 4                                                    |
| maker-3-augustus-gene-315.0-mRNA-1  | Indica | NA       |               | Os10g0347000 | OsR498G1018513200.01.T01 | (1->3)-beta-glucan endohydrolase                                         |
| maker-3-augustus-gene-315.10-mRNA-1 | Indica | NA       |               | Os10g0346200 | OsR498G1018510900.01.T01 | Zinc finger, RING/FYVE/PHD-type                                          |
| maker-3-augustus-gene-315.2-mRNA-1  | Indica | NA       |               | Os10g0346600 | OsR498G1018512600.01.T03 | Vacuolar-sorting receptor                                                |
| maker-3-augustus-gene-315.8-mRNA-1  | Indica | NA       |               | Os10g0346300 | OsR498G1018511200.01.T01 | Laccase                                                                  |
| maker-3-augustus-gene-316.21-mRNA-1 | Indica | NA       |               | Os10g0345100 | OsR498G1018505600.01.T02 | Protein DETOXIFICATION                                                   |
| maker-3-augustus-gene-317.42-mRNA-1 | Indica | NA       |               | Os10g0343500 |                          |                                                                          |
| maker-3-augustus-gene-322.9-mRNA-1  | Indica | NA       |               | Os10g0333700 | OsR498G1018475500.01.T01 |                                                                          |
| maker-3-augustus-gene-324.45-mRNA-1 | Indica | NA       |               | Os10g0330600 | OsR498G0612997600.01.T01 | Beta-galactosidase 14                                                    |
| maker-3-augustus-gene-328.13-mRNA-1 | Indica | NA       |               | Os10g0324600 | OsR498G1018442500.01.T01 | zinc finger protein 346                                                  |
| maker-3-augustus-gene-328.2-mRNA-1  | Indica | NA       |               | Os10g0490400 | OsR498G1018442800.01.T03 | Transposon protein, putative, unclassified, expressed                    |
| maker-3-augustus-gene-330.12-mRNA-1 | Indica | NA       |               | Os10g0322250 |                          | Inorganic phosphate transporter 6                                        |
| maker-3-augustus-gene-393.7-mRNA-1  | Indica | NA       |               | Os03g0656800 | OsR498G0306703500.01.T01 | Glucan endo-1,3-beta-D-glucosidase                                       |
| maker-3-augustus-gene-462.59-mRNA-1 | Indica | NA       |               |              |                          | Transcription factor PIF5                                                |
| maker-3-augustus-gene-463.0-mRNA-1  | Indica | NA       |               |              | OsR498G0307158500.01.T05 | Actin-related protein 7 isoform 1                                        |
| maker-3-augustus-gene-6.21-mRNA-1   | Indica | Japonica |               | Os03g0115300 | OsR498G0305117000.01.T04 | Pentatricopeptide repeat-containing protein (Fragment)                   |
| maker-3-augustus-gene-82.3-mRNA-1   | Indica | NA       |               | Os03g0259300 | OsR498G0305611700.01.T03 | ERAD-associated E3 ubiquitin-protein ligase component HRD3A like         |
| maker-4-augustus-gene-0.3-mRNA-1    | Indica | NA       |               |              | OsR498G0816152000.01.T01 |                                                                          |
| maker-4-augustus-gene-103.29-mRNA-1 | Indica | Indica   |               | Os02g0474700 | OsR498G0408169100.01.T06 | Importin-beta                                                            |
| maker-4-augustus-gene-103.36-mRNA-1 | Indica | NA       |               | Os04g0337500 | OsR498G0408169700.01.T01 | Probable aldo-keto reductase 1                                           |
| maker-4-augustus-gene-103.39-mRNA-1 | Indica | Japonica |               | Os04g0337700 | OsR498G0408170900.01.T04 | Probable aldo-keto reductase 2                                           |
| maker-4-augustus-gene-103.41-mRNA-1 | Indica | NA       |               | Os04g0338000 | OsR498G0408170900.01.T04 | Aldo-keto reductase 2                                                    |
| maker-4-augustus-gene-103.45-mRNA-1 | Indica | Indica   |               | Os04g0338000 | OsR498G0408171100.01.T04 | Aldo-keto reductase 2                                                    |
| maker-4-augustus-gene-105.6-mRNA-1  | Indica | NA       |               | Os04g0341100 |                          | Putative aldo/keto reductase AKR (Fragment)                              |
| maker-4-augustus-gene-105.9-mRNA-1  | Indica | NA       |               | Os04g0340300 | OsR498G0408179000.01.T02 | (+)-delta-cadinene synthase isozyme A                                    |
| maker-4-augustus-gene-108.29-mRNA-1 | Indica | NA       |               |              |                          | Transposon protein, putative, CACTA, En/Spm sub-class                    |
| maker-4-augustus-gene-108.32-mRNA-1 | Indica | Indica   |               | Os04g0341800 | OsR498G0408202600.01.T03 | Terpene synthase TPS38                                                   |
| maker-4-augustus-gene-110.38-mRNA-1 | Indica | NA       |               |              | OsR498G0408219900.01.T01 | MAU2 chromatid cohesion factor like                                      |
| maker-4-augustus-gene-110.44-mRNA-1 | Indica | NA       |               |              | OsR498G0408220300.01.T01 |                                                                          |
| maker-4-augustus-gene-110.59-mRNA-1 | Indica | NA       |               |              | OsR498G0408217400.01.T01 | Prolyl 4-hydroxylase 1                                                   |
| maker-4-augustus-gene-110.61-mRNA-1 | Indica | Indica   |               | Os04g0347200 | OsR498G0408218400.01.T01 | Acidic endochitinase                                                     |
| maker-4-augustus-gene-111.0-mRNA-1  | Indica | Indica   |               | Os04g0348300 | OsR498G0408222300.01.T01 | Cell division cycle 5-related protein                                    |
| maker-4-augustus-gene-111.15-mRNA-1 | Indica | NA       |               | Os04g0348400 | OsR498G0408222600.01.T01 | RING-type E3 ubiquitin transferase                                       |

|                                     |        |          |              |              |                          |                                                                          |
|-------------------------------------|--------|----------|--------------|--------------|--------------------------|--------------------------------------------------------------------------|
| maker-4-augustus-gene-111.22-mRNA-1 | Indica | NA       |              | Os04g0349500 | OsR498G0408225600.01.T01 | 40S ribosomal protein S8                                                 |
| maker-4-augustus-gene-111.5-mRNA-1  | Indica | NA       |              |              |                          | Response regulatory domain-containing protein                            |
| maker-4-augustus-gene-112.37-mRNA-1 | Indica | NA       |              | Os04g0350300 | OsR498G0408228100.01.T01 | Phragmoplast-associated kinesin-related protein                          |
| maker-4-augustus-gene-112.45-mRNA-1 | Indica | Indica   | LRR-TM       | Os04g0349700 | OsR498G0408227200.01.T02 | Putative verticillium wilt disease resistance protein                    |
| maker-4-augustus-gene-112.47-mRNA-1 | Indica | NA       |              | Os04g0350700 | OsR498G0408230800.01.T01 | Transcription factor bHLH77                                              |
| maker-4-augustus-gene-113.36-mRNA-1 | Indica | NA       |              | Os04g0352400 | OsR498G0408236200.01.T01 | Peptidylprolyl isomerase                                                 |
| maker-4-augustus-gene-113.40-mRNA-1 | Indica | NA       |              |              | OsR498G0408239000.01.T03 | Phospholipid-transporting ATPase                                         |
| maker-4-augustus-gene-124.31-mRNA-1 | Indica | NA       |              | Os04g0367400 | OsR498G0408336300.01.T01 | Reticulon-like protein (Fragment)                                        |
| maker-4-augustus-gene-124.33-mRNA-1 | Indica | NA       |              |              |                          | Putative WAK family receptor-like protein kinase                         |
| maker-4-augustus-gene-125.39-mRNA-1 | Indica | NA       | CC-Kinase-TM |              | OsR498G0408339000.01.T01 | Jacalin-like lectin domain containing protein                            |
| maker-4-augustus-gene-126.0-mRNA-1  | Indica | NA       | Kinase-TM    |              |                          | Protein kinase domain-containing protein (Fragment)                      |
| maker-4-augustus-gene-127.31-mRNA-1 | Indica | NA       |              |              |                          |                                                                          |
| maker-4-augustus-gene-130.31-mRNA-1 | Indica | NA       |              | Os03g0598600 |                          |                                                                          |
| maker-4-augustus-gene-130.4-mRNA-1  | Indica | Indica   |              | Os04g0377600 | OsR498G0408380900.01.T01 | Rab-GAP TBC domain-containing protein (Fragment)                         |
| maker-4-augustus-gene-131.22-mRNA-1 | Indica | NA       |              | Os04g0379900 | OsR498G0408386800.01.T01 | Stearoyl-acyl-carrier protein desaturase                                 |
| maker-4-augustus-gene-132.14-mRNA-1 | Indica | NA       |              | Os04g0381000 | OsR498G0408395400.01.T05 | Dynamin-related protein 3A isoform 2                                     |
| maker-4-augustus-gene-133.31-mRNA-1 | Indica | NA       |              | Os04g0382700 | OsR498G0408403100.01.T01 | Vacuolar protein sorting-associated protein 11 isogeny                   |
| maker-4-augustus-gene-133.33-mRNA-1 | Indica | NA       |              | Os04g0382800 | OsR498G0408403700.01.T02 |                                                                          |
| maker-4-augustus-gene-134.43-mRNA-1 | Indica | NA       |              |              |                          |                                                                          |
| maker-4-augustus-gene-137.34-mRNA-1 | Indica | Indica   |              | Os08g0532400 | OsR498G0408429300.01.T01 | Nodulin-like domain-containing protein                                   |
| maker-4-augustus-gene-138.0-mRNA-1  | Indica | NA       |              |              | OsR498G0408437300.01.T01 | Probable metal-nicotianamine transporter YSL6                            |
| maker-4-augustus-gene-138.12-mRNA-1 | Indica | NA       |              | Os04g0390700 | OsR498G0408437700.01.T01 | Hydroxysteroid dehydrogenase 1                                           |
| maker-4-augustus-gene-138.14-mRNA-1 | Indica | NA       |              | Os04g0390800 | OsR498G0408438300.01.T01 | 11-beta-hydroxysteroid dehydrogenase 1B                                  |
| maker-4-augustus-gene-138.15-mRNA-1 | Indica | NA       |              | Os04g0390800 | OsR498G0408438300.01.T01 | 11-beta-hydroxysteroid dehydrogenase 1B                                  |
| maker-4-augustus-gene-138.27-mRNA-1 | Indica | NA       |              | Os04g0391000 | OsR498G0408438600.01.T03 | RecQ-mediated genome instability protein 1                               |
| maker-4-augustus-gene-138.6-mRNA-1  | Indica | NA       |              |              | OsR498G0408437500.01.T01 | Probable metal-nicotianamine transporter YSL6                            |
| maker-4-augustus-gene-147.38-mRNA-1 | Indica | Indica   |              | Os02g0527200 | OsR498G0408507000.01.T03 |                                                                          |
| maker-4-augustus-gene-148.0-mRNA-1  | Indica | NA       |              | Os04g0408600 | OsR498G0408516600.01.T01 | RAB6-interacting golgin                                                  |
| maker-4-augustus-gene-148.6-mRNA-1  | Indica | Indica   |              | Os02g0528200 | OsR498G0408518200.01.T01 | 1,4-alpha-glucan branching enzyme                                        |
| maker-4-augustus-gene-149.11-mRNA-1 | Indica | NA       |              | Os04g0410300 | OsR498G0408520300.01.T03 | Late embryogenesis abundant protein-related / LEA protein-related        |
| maker-4-augustus-gene-149.15-mRNA-1 | Indica | NA       |              | Os04g0410400 | OsR498G0408520500.01.T01 | Late embryogenesis abundant protein-related / LEA protein-related        |
| maker-4-augustus-gene-149.20-mRNA-1 | Indica | NA       |              | Os04g0410200 | OsR498G0408519000.01.T02 | Serine/threonine-protein kinase KIPK                                     |
| maker-4-augustus-gene-149.21-mRNA-1 | Indica | NA       |              | Os04g0410250 |                          |                                                                          |
| maker-4-augustus-gene-149.28-mRNA-1 | Indica | NA       |              | Os04g0410600 | OsR498G0408520800.01.T01 | Purple acid phosphatase                                                  |
| maker-4-augustus-gene-150.38-mRNA-1 | Indica | NA       |              | Os04g0412300 | OsR498G0408526500.01.T02 | Glucan endo-13-beta-glucosidase 14                                       |
| maker-4-augustus-gene-150.40-mRNA-1 | Indica | NA       |              |              | OsR498G0408527700.01.T04 | Bifunctional monodehydroascorbate reductase and carbonic anhydrase nec   |
| maker-4-augustus-gene-151.36-mRNA-1 | Indica | NA       |              | Os04g0414000 |                          | Mitochondrial fission protein ELM1                                       |
| maker-4-augustus-gene-152.37-mRNA-1 | Indica | NA       |              | Os04g0415900 | OsR498G0408543100.01.T01 | AAI domain-containing protein (Fragment)                                 |
| maker-4-augustus-gene-152.39-mRNA-1 | Indica | NA       |              | Os04g0416000 | OsR498G0408543300.01.T01 | DUF1279 domain-containing protein (Fragment)                             |
| maker-4-augustus-gene-152.50-mRNA-1 | Indica | Indica   |              | Os02g0537500 | OsR498G0408543600.01.T04 | Transcription factor E2FA                                                |
| maker-4-augustus-gene-153.37-mRNA-1 | Indica | Japonica |              | Os04g0417900 | OsR498G0408552100.01.T01 |                                                                          |
| maker-4-augustus-gene-153.39-mRNA-1 | Indica | NA       |              | Os04g0418000 | OsR498G0408552500.01.T01 | Succinate dehydrogenase subunit 5 like                                   |
| maker-4-augustus-gene-153.41-mRNA-1 | Indica | NA       |              | Os04g0417800 | OsR498G0408551400.01.T02 | Protein phosphatase type 2A regulator/ signal transducer                 |
| maker-4-augustus-gene-172.40-mRNA-1 | Indica | NA       |              | Os04g0451100 |                          | Polyadenylate-binding protein 2                                          |
| maker-4-augustus-gene-172.44-mRNA-1 | Indica | NA       |              | Os04g0451200 | OsR498G0408673700.01.T01 | Glycosyltransferase                                                      |
| maker-4-augustus-gene-200.40-mRNA-1 | Indica | NA       |              | Os04g0508100 |                          | Isocitrate dehydrogenase [NADP]                                          |
| maker-4-augustus-gene-200.42-mRNA-1 | Indica | NA       |              |              | OsR498G0408865700.01.T01 | Isocitrate dehydrogenase                                                 |
| maker-4-augustus-gene-204.6-mRNA-1  | Indica | NA       |              | Os04g0515900 | OsR498G0408893100.01.T01 | NAC transcription factor                                                 |
| maker-4-augustus-gene-205.15-mRNA-1 | Indica | NA       |              | Os04g0517100 | OsR498G0408899800.01.T01 | Transcription factor MYB4                                                |
| maker-4-augustus-gene-205.17-mRNA-1 | Indica | NA       |              | Os04g0517300 | OsR498G0408901000.01.T01 | Root UVB sensitive family                                                |
| maker-4-augustus-gene-205.3-mRNA-1  | Indica | Indica   |              | Os04g0517400 | OsR498G0408901100.01.T01 | Hexosyltransferase                                                       |
| maker-4-augustus-gene-205.9-mRNA-1  | Indica | NA       | Kinase-TM    | Os04g0517500 | OsR498G0408901300.01.T01 | Phosphoenolpyruvate carboxylase kinase                                   |
| maker-4-augustus-gene-208.49-mRNA-1 | Indica | Indica   |              | Os04g0521200 | OsR498G0408917900.01.T01 | V-type proton ATPase subunit G1                                          |
| maker-4-augustus-gene-209.2-mRNA-1  | Indica | NA       |              | Os04g0524300 | OsR498G0408926300.01.T01 | Two-component response regulator ORR5                                    |
| maker-4-augustus-gene-213.61-mRNA-1 | Indica | NA       |              | Os04g0534000 | OsR498G0408964300.01.T02 | CAP10 domain-containing protein (Fragment)                               |
| maker-4-augustus-gene-214.0-mRNA-1  | Indica | Indica   |              | Os02g0642700 | OsR498G0408964500.01.T05 | Downstream target of AGL15 2                                             |
| maker-4-augustus-gene-216.39-mRNA-1 | Indica | NA       |              | Os04g0538000 | OsR498G0408982500.01.T02 | Hsp organizing protein/stress-inducible protein                          |
| maker-4-augustus-gene-216.57-mRNA-1 | Indica | Indica   |              | Os04g0538100 | OsR498G0408982800.01.T03 | Elongation factor G, chloroplastic                                       |
| maker-4-augustus-gene-22.46-mRNA-1  | Indica | Indica   |              | Os02g0101000 | OsR498G0407717000.01.T02 | Vacuolar amino acid transporter 1                                        |
| maker-4-augustus-gene-241.68-mRNA-1 | Indica | NA       |              |              |                          | RecBCD enzyme subunit RecB, P-loop containing nucleoside triphosphate hy |
| maker-4-augustus-gene-244.0-mRNA-1  | Indica | NA       |              |              |                          | DNA replication ATP-dependent helicase/nuclease                          |

|                                     |        |          |           |              |                          |                                                                              |
|-------------------------------------|--------|----------|-----------|--------------|--------------------------|------------------------------------------------------------------------------|
| maker-4-augustus-gene-249.38-mRNA-1 | Indica | NA       |           | Os04g0600400 | OsR498G0409221000.01.T01 | Baculoviral IAP repeat-containing protein 1a                                 |
| maker-4-augustus-gene-249.41-mRNA-1 | Indica | Indica   |           | Os02g0700700 | OsR498G0409221200.01.T03 | Protein BREVIS RADIX                                                         |
| maker-4-augustus-gene-249.7-mRNA-1  | Indica | NA       |           |              |                          | UvrD-helicase domain-containing protein (Fragment)                           |
| maker-4-augustus-gene-254.30-mRNA-1 | Indica | NA       |           | Os04g0608400 | OsR498G0409250300.01.T01 | Nuclear pore complex protein NUP88                                           |
| maker-4-augustus-gene-254.34-mRNA-1 | Indica | NA       |           | Os04g0608800 | OsR498G0409252300.01.T01 | Evolutionarily conserved C-terminal region 10                                |
| maker-4-augustus-gene-254.37-mRNA-1 | Indica | NA       |           | Os04g0607600 | OsR498G0409246400.01.T03 | Probable cation transporter HKT7                                             |
| maker-4-augustus-gene-254.53-mRNA-1 | Indica | NA       |           |              | OsR498G0409251200.01.T01 | probable nucleoredoxin 3                                                     |
| maker-4-augustus-gene-255.17-mRNA-1 | Indica | NA       |           | Os04g0609700 | OsR498G0409256800.01.T04 | PHD-type domain-containing protein                                           |
| maker-4-augustus-gene-255.7-mRNA-1  | Indica | NA       | Kinase-TM | Os04g0608900 | OsR498G0409252600.01.T01 | serine/threonine-protein kinase STY13                                        |
| maker-4-augustus-gene-262.27-mRNA-1 | Indica | Indica   | Kinase-TM | Os11g0692100 | OsR498G0407758000.01.T01 | Bacterial blight resistance protein XA26                                     |
| maker-4-augustus-gene-263.39-mRNA-1 | Indica | NA       |           |              | OsR498G0407881700.01.T01 | Transposon protein, putative, Mutator sub-class                              |
| maker-4-augustus-gene-267.54-mRNA-1 | Indica | Indica   |           | Os04g0630800 | OsR498G0409329100.01.T02 | Epimerase domain-containing protein (Fragment)                               |
| maker-4-augustus-gene-267.55-mRNA-1 | Indica | Indica   |           | Os04g0631000 | OsR498G0409329500.01.T01 | Epimerase domain-containing protein                                          |
| maker-4-augustus-gene-267.58-mRNA-1 | Indica | NA       |           |              |                          | Epimerase domain-containing protein (Fragment)                               |
| maker-4-augustus-gene-268.3-mRNA-1  | Indica | NA       | Kinase-TM | Os04g0631800 | OsR498G0409332600.01.T02 | Serine/threonine-protein kinase                                              |
| maker-4-augustus-gene-268.39-mRNA-1 | Indica | Japonica | Kinase-TM | Os04g0634000 | OsR498G0409338400.01.T01 | G-type lectin S-receptor-like serine/threonine-protein kinase                |
| maker-4-augustus-gene-268.7-mRNA-1  | Indica | NA       | Kinase-TM | Os04g0632100 | OsR498G0409332800.01.T04 | Non-specific serine/threonine protein kinase                                 |
| maker-4-augustus-gene-278.31-mRNA-1 | Indica | NA       |           | Os04g0652900 | OsR498G0409400600.01.T04 | Aminoacyl-tRNA hydrolase                                                     |
| maker-4-augustus-gene-278.7-mRNA-1  | Indica | NA       |           |              |                          | Aspergillus nuclease S(1)                                                    |
| maker-4-augustus-gene-28.36-mRNA-1  | Indica | NA       |           |              | OsR498G1019263000.01.T04 | Serrate RNA effector molecule (Fragment)                                     |
| maker-4-augustus-gene-28.42-mRNA-1  | Indica | NA       |           | Os04g0218900 | OsR498G0407752500.01.T03 | TRAF-type domain-containing protein                                          |
| maker-4-augustus-gene-28.48-mRNA-1  | Indica | NA       |           |              |                          |                                                                              |
| maker-4-augustus-gene-280.15-mRNA-1 | Indica | NA       |           | Os04g0656500 | OsR498G0409415100.01.T01 | Squamosa promoter-binding-like protein 8                                     |
| maker-4-augustus-gene-284.21-mRNA-1 | Indica | NA       |           |              | OsR498G0409438800.01.T01 | Homeobox domain-containing protein (Fragment)                                |
| maker-4-augustus-gene-284.23-mRNA-1 | Indica | NA       |           | Os04g0663700 | OsR498G0409439800.01.T03 | TLDc domain-containing protein (Fragment)                                    |
| maker-4-augustus-gene-284.27-mRNA-1 | Indica | NA       |           |              | OsR498G0409440000.01.T01 | Peptidyl-prolyl cis-trans isomerase                                          |
| maker-4-augustus-gene-285.0-mRNA-1  | Indica | NA       |           | Os04g0665000 | OsR498G0409445100.01.T01 | cytochrome c oxidase-assembly factor COX23, mitochondrial                    |
| maker-4-augustus-gene-285.17-mRNA-1 | Indica | NA       |           |              | OsR498G0409445000.01.T04 | Beta-fructofuranosidase, insoluble isoenzyme 6                               |
| maker-4-augustus-gene-285.21-mRNA-1 | Indica | NA       |           | Os04g0665200 | OsR498G0409445400.01.T02 | Indole-3-acetate O-methyltransferase 1                                       |
| maker-4-augustus-gene-285.7-mRNA-1  | Indica | NA       |           | Os04g0665700 | OsR498G0409449300.01.T02 | Putative plastid-lipid-associated protein 13 chloroplastic                   |
| maker-4-augustus-gene-286.22-mRNA-1 | Indica | NA       |           | Os04g0666900 | OsR498G0409453600.01.T03 | Kinesin-like calmodulin-binding protein (ZWICHEL) isoform 4                  |
| maker-4-augustus-gene-29.0-mRNA-1   | Indica | NA       |           | Os04g0220300 |                          | Wall-associated receptor kinase-like 16                                      |
| maker-4-augustus-gene-30.0-mRNA-1   | Indica | NA       |           | Os04g0221000 | OsR498G0407755400.01.T01 |                                                                              |
| maker-4-augustus-gene-30.4-mRNA-1   | Indica | NA       |           | Os04g0221600 | OsR498G0407756000.01.T02 | PHD domain-containing protein                                                |
| maker-4-augustus-gene-31.39-mRNA-1  | Indica | Indica   | Kinase-TM | Os11g0692100 | OsR498G0407758000.01.T01 | Receptor kinase MRKa                                                         |
| maker-4-augustus-gene-33.0-mRNA-1   | Indica | NA       |           |              |                          | Vacuolar protein sorting-associated protein 33 like                          |
| maker-4-augustus-gene-33.11-mRNA-1  | Indica | NA       |           | Os04g0223901 | OsR498G0407762400.01.T01 | Flavin-containing monooxygenase                                              |
| maker-4-augustus-gene-33.6-mRNA-1   | Indica | NA       |           | Os04g0223300 | OsR498G0407761800.01.T01 | L-ascorbate peroxidase                                                       |
| maker-4-augustus-gene-34.0-mRNA-1   | Indica | NA       |           | Os04g0224600 | OsR498G0407764000.01.T02 | SEC1 family transport protein SLY1-like                                      |
| maker-4-augustus-gene-34.4-mRNA-1   | Indica | Indica   |           | Os04g0224900 | OsR498G0407764800.01.T05 | Glycerol-3-phosphate dehydrogenase                                           |
| maker-4-augustus-gene-62.50-mRNA-1  | Indica | NA       |           |              | OsR498G0407924400.01.T01 | FMN-linked oxidoreductase superfamily protein                                |
| maker-4-augustus-gene-63.3-mRNA-1   | Indica | NA       |           |              |                          | CYTH domain-containing protein                                               |
| maker-4-augustus-gene-63.7-mRNA-1   | Indica | Japonica |           | Os04g0280500 | OsR498G0407926900.01.T01 | F-box domain-containing protein                                              |
| maker-4-augustus-gene-64.0-mRNA-1   | Indica | NA       |           | Os04g0282200 | OsR498G0407930900.01.T03 | 1-phosphatidylinositol-4,5-bisphosphate phosphodiesterase epsilon-1          |
| maker-4-augustus-gene-64.2-mRNA-1   | Indica | Indica   |           | Os04g0282400 | OsR498G0407932400.01.T02 | Flowering-promoting factor 1                                                 |
| maker-4-augustus-gene-68.40-mRNA-1  | Indica | Japonica |           | Os04g0288100 | OsR498G0816248400.01.T01 | Germin-like protein 8-14                                                     |
| maker-4-augustus-gene-86.32-mRNA-1  | Indica | NA       | CC-NBS-TM |              | OsR498G0408112900.01.T01 | Putative NBS-LRR class RGA                                                   |
| maker-4-augustus-gene-89.4-mRNA-1   | Indica | NA       |           | Os10g0343500 |                          |                                                                              |
| maker-4-augustus-gene-92.18-mRNA-1  | Indica | NA       |           | Os04g0321800 | OsR498G0408083400.01.T01 | PPM-type phosphatase domain-containing protein                               |
| maker-4-augustus-gene-97.3-mRNA-1   | Indica | NA       |           | Os04g0326300 | OsR498G0408118000.01.T02 | tRNA (adenine(58)-N(1))-methyltransferase                                    |
| maker-5-augustus-gene-12.3-mRNA-1   | Indica | NA       |           |              | OsR498G0714022200.01.T01 |                                                                              |
| maker-5-augustus-gene-12.5-mRNA-1   | Indica | NA       |           |              |                          | Ulp1 protease family, C-terminal catalytic domain containing protein, expres |
| maker-5-augustus-gene-138.19-mRNA-1 | Indica | NA       |           | Os05g0302300 | OsR498G0510395600.01.T01 | Lysine-specific demethylase                                                  |
| maker-5-augustus-gene-139.10-mRNA-1 | Indica | NA       |           |              | OsR498G0510403200.01.T01 | RRM domain-containing protein                                                |
| maker-5-augustus-gene-139.6-mRNA-1  | Indica | NA       |           |              | OsR498G0510402900.01.T01 | RRM domain-containing protein (Fragment)                                     |
| maker-5-augustus-gene-139.8-mRNA-1  | Indica | NA       |           | Os05g0302700 | OsR498G0510399200.01.T02 | ADP ATP carrier protein 3 mitochondrial                                      |
| maker-5-augustus-gene-140.0-mRNA-1  | Indica | NA       |           | Os05g0304400 | OsR498G0510406900.01.T01 | Guanosine nucleotide diphosphate dissociation inhibitor                      |
| maker-5-augustus-gene-140.10-mRNA-1 | Indica | Japonica |           | Os05g0304200 | OsR498G1120445500.01.T02 | Plastid-lipid-associated protein 6, chloroplastic                            |
| maker-5-augustus-gene-140.7-mRNA-1  | Indica | NA       |           | Os05g0304600 | OsR498G0510408500.01.T01 | Lipoxygenase                                                                 |
| maker-5-augustus-gene-140.9-mRNA-1  | Indica | NA       |           | Os05g0319900 | OsR498G0510483800.01.T01 | Endo-1,4-beta-xylanase                                                       |
| maker-5-augustus-gene-141.0-mRNA-1  | Indica | NA       |           | Os05g0305100 | OsR498G0510411900.01.T02 | Transcription factor IIIB subunit                                            |

|                                     |        |          |           |              |                          |                                                                                |
|-------------------------------------|--------|----------|-----------|--------------|--------------------------|--------------------------------------------------------------------------------|
| maker-5-augustus-gene-141.16-mRNA-1 | Indica | Indica   |           | Os05g0304900 | OsR498G0510410400.01.T02 | GH10 domain-containing protein (Fragment)                                      |
| maker-5-augustus-gene-146.0-mRNA-1  | Indica | NA       |           | Os08g0299000 | OsR498G0815695900.01.T05 | UPF0103/Mediator of ErbB2-driven cell motility (Memo-related)                  |
| maker-5-augustus-gene-156.0-mRNA-1  | Indica | NA       |           | Os05g0326650 |                          | DUF659 domain-containing protein                                               |
| maker-5-augustus-gene-156.1-mRNA-1  | Indica | NA       |           | Os05g0326650 |                          | DUF659 domain-containing protein                                               |
| maker-5-augustus-gene-156.4-mRNA-1  | Indica | Japonica |           | Os05g0327100 | OsR498G1221921500.01.T05 | Pumilio/PUF RNA binding protein 6                                              |
| maker-5-augustus-gene-161.0-mRNA-1  | Indica | NA       |           | Os05g0331200 | OsR498G0510525000.01.T01 | External alternative NAD(P)H-ubiquinone oxidoreductase B3, mitochondrial       |
| maker-5-augustus-gene-162.1-mRNA-1  | Indica | NA       |           | Os07g0212400 |                          | HGWP repeat containing protein-like                                            |
| maker-5-augustus-gene-162.17-mRNA-1 | Indica | NA       |           |              | OsR498G0510534010.01.T01 | YTH domain-containing protein                                                  |
| maker-5-augustus-gene-162.19-mRNA-1 | Indica | NA       |           | Os05g0334400 | OsR498G0510534000.01.T01 | Heat shock protein DnaJ                                                        |
| maker-5-augustus-gene-162.8-mRNA-1  | Indica | NA       |           | Os05g0333200 | OsR498G0510532800.01.T01 | Guanine nucleotide-binding protein alpha-1 subunit                             |
| maker-5-augustus-gene-163.0-mRNA-1  | Indica | NA       |           |              |                          | Saposin B-type domain-containing protein                                       |
| maker-5-augustus-gene-163.1-mRNA-1  | Indica | NA       |           | Os05g0334400 | OsR498G0510534000.01.T01 | Heat shock protein DnaJ                                                        |
| maker-5-augustus-gene-163.15-mRNA-1 | Indica | NA       |           |              | OsR498G0510541400.01.T08 | Phospholipid-transporting ATPase                                               |
| maker-5-augustus-gene-164.35-mRNA-1 | Indica | NA       |           |              |                          | Retrotransposon protein, putative, unclassified                                |
| maker-5-augustus-gene-164.37-mRNA-1 | Indica | NA       |           |              |                          | Putative peptide/nitrate transporter                                           |
| maker-5-augustus-gene-164.41-mRNA-1 | Indica | NA       |           | Os05g0337200 | OsR498G0510547400.01.T01 | Transcription factor bHLH61 like                                               |
| maker-5-augustus-gene-164.43-mRNA-1 | Indica | NA       |           |              |                          | Polynucleotidyl transferase, ribonuclease H-like superfamily protein, putative |
| maker-5-augustus-gene-165.31-mRNA-1 | Indica | Indica   |           | Os05g0338933 | OsR498G0510554500.01.T01 | Nitrate excretion transporter 1                                                |
| maker-5-augustus-gene-165.35-mRNA-1 | Indica | Japonica |           | Os05g0339200 | OsR498G0510555700.01.T02 | SAM domain-containing protein                                                  |
| maker-5-augustus-gene-165.37-mRNA-1 | Indica | NA       |           |              | OsR498G0510554800.01.T02 | GAT domain-containing protein                                                  |
| maker-5-augustus-gene-166.36-mRNA-1 | Indica | NA       |           | Os05g0341600 | OsR498G0510561200.01.T01 | Ras-related protein Rab-21                                                     |
| maker-5-augustus-gene-167.32-mRNA-1 | Indica | NA       |           | Os12g0275500 | OsR498G1221283500.01.T01 |                                                                                |
| maker-5-augustus-gene-169.33-mRNA-1 | Indica | NA       |           |              | OsR498G0510592600.01.T01 | NADH dehydrogenase-like complex L                                              |
| maker-5-augustus-gene-171.2-mRNA-1  | Indica | NA       |           |              | OsR498G0510583100.01.T01 | Cellular retinaldehyde binding/alpha-tocopherol transport                      |
| maker-5-augustus-gene-172.0-mRNA-1  | Indica | NA       |           | Os05g0349700 | OsR498G0510598100.01.T06 | Chlorophyll synthase chloroplastic                                             |
| maker-5-augustus-gene-172.19-mRNA-1 | Indica | NA       |           | Os05g0349500 | OsR498G0510597400.01.T02 | Nuclear pore complex protein NUP50A                                            |
| maker-5-augustus-gene-172.20-mRNA-1 | Indica | NA       |           | Os05g0349800 | OsR498G0510598400.01.T02 | Em protein H2                                                                  |
| maker-5-augustus-gene-172.9-mRNA-1  | Indica | Indica   |           | Os07g0693500 | OsR498G0510595800.01.T01 | AMP deaminase                                                                  |
| maker-5-augustus-gene-173.21-mRNA-1 | Indica | NA       |           | Os05g0350500 | OsR498G0510601700.01.T01 | ERBB-3 BINDING PROTEIN 1                                                       |
| maker-5-augustus-gene-173.26-mRNA-1 | Indica | NA       |           | Os05g0350600 | OsR498G0510602300.01.T01 | Ran-binding protein c                                                          |
| maker-5-augustus-gene-173.29-mRNA-1 | Indica | NA       |           | Os05g0350700 | OsR498G0510602900.01.T02 | Serine/arginine repetitive matrix protein 2 isoform 4                          |
| maker-5-augustus-gene-180.36-mRNA-1 | Indica | NA       |           | Os05g0361500 | OsR498G0510656300.01.T01 | Pectinesterase                                                                 |
| maker-5-augustus-gene-181.6-mRNA-1  | Indica | NA       |           |              |                          | Putative E3 ubiquitin-protein ligase LIN-1                                     |
| maker-5-augustus-gene-182.18-mRNA-1 | Indica | NA       |           | Os05g0364600 | OsR498G0510668900.01.T03 | Arginine/serine-rich splicing factor SR30 transcript VI                        |
| maker-5-augustus-gene-182.23-mRNA-1 | Indica | Indica   |           | Os01g0586600 | OsR498G0510669100.01.T01 | SNF1-related protein kinase regulatory subunit gamma 1                         |
| maker-5-augustus-gene-182.25-mRNA-1 | Indica | NA       |           | Os01g0597400 | OsR498G0101422900.01.T01 | Amino acid/polyamine transporter II                                            |
| maker-5-augustus-gene-183.21-mRNA-1 | Indica | NA       |           | Os05g0366000 | OsR498G0510676300.01.T03 | Sinigrinase                                                                    |
| maker-5-augustus-gene-183.3-mRNA-1  | Indica | NA       |           |              |                          | Beta-glucosidase 20-like isoform X1                                            |
| maker-5-augustus-gene-183.6-mRNA-1  | Indica | Indica   |           | Os05g0366000 | OsR498G0510674700.01.T01 | 4-hydroxy-7-methoxy-3-oxo-3,4-dihydro-2H-1,4-benzoxazin-2-yl glucoside beta    |
| maker-5-augustus-gene-184.0-mRNA-1  | Indica | Indica   |           | Os05g0366000 | OsR498G0510676700.01.T01 | Beta-glucosidase 20                                                            |
| maker-5-augustus-gene-184.2-mRNA-1  | Indica | NA       |           | Os05g0366300 | OsR498G0510677300.01.T03 | C2 domain-containing protein / GRAM domain-containing protein isoform 1        |
| maker-5-augustus-gene-184.6-mRNA-1  | Indica | NA       |           | Os05g0366600 | OsR498G0510677900.01.T01 | Non-cyanogenic beta-glucosidase                                                |
| maker-5-augustus-gene-185.12-mRNA-1 | Indica | NA       |           | Os05g0367400 | OsR498G0510680800.01.T01 | Thiamine pyrophosphokinase                                                     |
| maker-5-augustus-gene-186.0-mRNA-1  | Indica | NA       |           | Os05g0368300 | OsR498G0510685100.01.T01 | S4 RNA-binding domain-containing protein (Fragment)                            |
| maker-5-augustus-gene-188.24-mRNA-1 | Indica | NA       |           | Os05g0371200 | OsR498G0510696700.01.T01 | 26S proteasome regulatory subunit RPN11                                        |
| maker-5-augustus-gene-188.30-mRNA-1 | Indica | Indica   | Kinase    | Os01g0936100 | OsR498G0510698900.01.T01 | Serine/threonine-protein kinase PBL27                                          |
| maker-5-augustus-gene-188.34-mRNA-1 | Indica | NA       |           | Os05g0370700 | OsR498G0510694200.01.T01 | AB hydrolase-1 domain-containing protein (Fragment)                            |
| maker-5-augustus-gene-188.36-mRNA-1 | Indica | Indica   |           | Os05g0370700 | OsR498G0510694600.01.T01 | Salicylic acid-binding protein 2                                               |
| maker-5-augustus-gene-188.38-mRNA-1 | Indica | Japonica |           | Os05g0371100 | OsR498G0510695800.01.T02 | CW-type domain-containing protein                                              |
| maker-5-augustus-gene-188.44-mRNA-1 | Indica | NA       | Kinase-TM |              | OsR498G0510697600.01.T02 | Receptor-like protein kinase ANXUR1                                            |
| maker-5-augustus-gene-188.47-mRNA-1 | Indica | NA       |           | Os05g0372000 | OsR498G0510698400.01.T01 | Succinate dehydrogenase subunit 4 mitochondrial                                |
| maker-5-augustus-gene-189.0-mRNA-1  | Indica | NA       |           | Os05g0372300 | OsR498G0510699300.01.T01 | Cytochrome P450 family 72 subfamily A polypeptide 8                            |
| maker-5-augustus-gene-189.12-mRNA-1 | Indica | NA       |           | Os05g0373400 | OsR498G0510703100.01.T01 | RNA-binding protein BRN1                                                       |
| maker-5-augustus-gene-189.17-mRNA-1 | Indica | NA       |           | Os05g0373700 | OsR498G0510704100.01.T01 | NAC-A/B domain-containing protein (Fragment)                                   |
| maker-5-augustus-gene-189.2-mRNA-1  | Indica | NA       |           | Os05g0372800 | OsR498G0510700100.01.T01 | F-box domain-containing protein (Fragment)                                     |
| maker-5-augustus-gene-189.20-mRNA-1 | Indica | NA       |           | Os05g0372400 | OsR498G0510699600.01.T02 | probable feruloyl esterase A                                                   |
| maker-5-augustus-gene-189.25-mRNA-1 | Indica | NA       |           |              | OsR498G0510701600.01.T01 | Enolase-phosphatase E1-like                                                    |
| maker-5-augustus-gene-189.27-mRNA-1 | Indica | NA       |           | Os05g0373000 | OsR498G0510701800.01.T01 | Vesicle-associated protein 2-2                                                 |
| maker-5-augustus-gene-189.32-mRNA-1 | Indica | Indica   |           | Os01g0938600 | OsR498G0510703600.01.T01 | Tyrosine-protein phosphatase non-receptor type 23-like                         |
| maker-5-augustus-gene-189.5-mRNA-1  | Indica | NA       |           | Os05g0373300 | OsR498G0510702700.01.T03 | VWFA domain-containing protein                                                 |
| maker-5-augustus-gene-19.2-mRNA-1   | Indica | NA       |           | Os08g0448900 |                          | ATP-dependent DNA helicase                                                     |

|                                     |        |          |               |              |                          |                                                                    |
|-------------------------------------|--------|----------|---------------|--------------|--------------------------|--------------------------------------------------------------------|
| maker-5-augustus-gene-190.0-mRNA-1  | Indica | NA       |               | Os05g0374200 | OsR498G0510705500.01.T01 | Cytokinin dehydrogenase                                            |
| maker-5-augustus-gene-190.3-mRNA-1  | Indica | NA       |               |              | OsR498G0510706700.01.T01 | Heat shock protein DnaJ with tetratricopeptide repeat              |
| maker-5-augustus-gene-190.8-mRNA-1  | Indica | Indica   |               | Os01g0940100 | OsR498G0510709000.01.T01 | Phosphotransferase                                                 |
| maker-5-augustus-gene-191.54-mRNA-1 | Indica | Japonica |               | Os05g0376501 | OsR498G0408835700.01.T02 | Integral membrane transporter-like protein                         |
| maker-5-augustus-gene-20.9-mRNA-1   | Indica | NA       |               | Os05g0134800 | OsR498G0509684100.01.T01 | Peroxidase                                                         |
| maker-5-augustus-gene-204.20-mRNA-1 | Indica | NA       |               |              | OsR498G0510795700.01.T01 | Gdsl esteraselipase                                                |
| maker-5-augustus-gene-204.24-mRNA-1 | Indica | NA       |               |              | OsR498G0510796500.01.T04 | 23 kDa subunit of oxygen evolving system of photosystem II         |
| maker-5-augustus-gene-204.32-mRNA-1 | Indica | NA       |               | Os05g0401100 | OsR498G0510796000.01.T01 | UPF0603 protein, chloroplastic                                     |
| maker-5-augustus-gene-204.34-mRNA-1 | Indica | NA       |               |              | OsR498G0510796200.01.T02 | Guanine nucleotide-binding protein-like 3-like protein             |
| maker-5-augustus-gene-205.0-mRNA-1  | Indica | NA       |               |              |                          | Putative alpha-ketoglutarate-dependent dioxygenase ABH5 (Fragment) |
| maker-5-augustus-gene-212.34-mRNA-1 | Indica | Indica   |               | Os05g0410900 | OsR498G0510828700.01.T01 | Putative proton-dependent oligopeptide transporter (POT)           |
| maker-5-augustus-gene-212.36-mRNA-1 | Indica | NA       |               |              | OsR498G0510830700.01.T01 | SUZ domain-containing protein                                      |
| maker-5-augustus-gene-212.42-mRNA-1 | Indica | Indica   |               | Os05g0411200 | OsR498G0510829000.01.T03 | Putative endonuclease or glycosyl hydrolase                        |
| maker-5-augustus-gene-212.51-mRNA-1 | Indica | Indica   |               | Os05g0411300 | OsR498G0510829200.01.T01 | BZIP transcription factor                                          |
| maker-5-augustus-gene-213.0-mRNA-1  | Indica | NA       |               | Os05g0413200 | OsR498G0510837700.01.T02 | Tubulin beta chain                                                 |
| maker-5-augustus-gene-213.15-mRNA-1 | Indica | NA       |               | Os05g0414400 |                          | DUF659 domain-containing protein                                   |
| maker-5-augustus-gene-213.3-mRNA-1  | Indica | NA       |               | Os05g0413400 | OsR498G0510838300.01.T01 | Isopentenyl-diphosphate Delta-isomerase                            |
| maker-5-augustus-gene-213.7-mRNA-1  | Indica | NA       |               |              | OsR498G0510836400.01.T01 | Glutathione S-transferase GST 41                                   |
| maker-5-augustus-gene-213.9-mRNA-1  | Indica | NA       |               |              | OsR498G0510840800.01.T01 | TFIIIS N-terminal domain-containing protein                        |
| maker-5-augustus-gene-214.30-mRNA-1 | Indica | NA       |               |              | OsR498G0510844100.01.T01 | Glutathione gamma-glutamylcysteinyltransferase                     |
| maker-5-augustus-gene-214.34-mRNA-1 | Indica | NA       |               | Os05g0415700 | OsR498G0510845100.01.T03 | Beta-N-acetylhexosaminidase                                        |
| maker-5-augustus-gene-214.38-mRNA-1 | Indica | NA       |               |              | OsR498G0510845300.01.T01 | Obtusifoliol 14-alpha demethylase                                  |
| maker-5-augustus-gene-214.40-mRNA-1 | Indica | NA       | Kinase-LRR-TM | Os05g0414700 | OsR498G0510843600.01.T02 | Serine/threonine protein kinase                                    |
| maker-5-augustus-gene-214.45-mRNA-1 | Indica | NA       |               |              | OsR498G0510845000.01.T04 |                                                                    |
| maker-5-augustus-gene-215.38-mRNA-1 | Indica | NA       |               | Os05g0417300 | OsR498G0510850300.01.T01 | RPA-interacting protein B                                          |
| maker-5-augustus-gene-215.41-mRNA-1 | Indica | NA       |               | Os05g0417000 | OsR498G0510848800.01.T01 | LOB domain-containing protein 6                                    |
| maker-5-augustus-gene-216.28-mRNA-1 | Indica | NA       |               | Os05g0418000 | OsR498G0510853700.01.T01 | Guanosine nucleotide diphosphate dissociation inhibitor            |
| maker-5-augustus-gene-216.40-mRNA-1 | Indica | Indica   |               | Os05g0418100 | OsR498G0510854000.01.T02 |                                                                    |
| maker-5-augustus-gene-23.30-mRNA-1  | Indica | NA       |               | Os05g0140100 | OsR498G0509709100.01.T03 | MYB18 transcription factor                                         |
| maker-5-augustus-gene-23.33-mRNA-1  | Indica | NA       |               | Os05g0140333 | OsR498G0509709900.01.T01 | Bromodomain adjacent to zinc finger domain protein 2B-like         |
| maker-5-augustus-gene-247.14-mRNA-1 | Indica | NA       | Kinase-LRR-TM | Os05g0481100 | OsR498G0511055300.01.T09 | Putative LRR receptor-like serine/threonine-protein kinase-like    |
| maker-5-augustus-gene-247.29-mRNA-1 | Indica | NA       | Kinase-LRR-TM | Os05g0480400 | OsR498G0511051800.01.T01 | Putative inactive receptor kinase                                  |
| maker-5-augustus-gene-25.84-mRNA-1  | Indica | NA       |               | Os05g0145000 | OsR498G0509725000.01.T01 | E3 ubiquitin-protein ligase SIS3                                   |
| maker-5-augustus-gene-26.18-mRNA-1  | Indica | NA       |               | Os05g0146900 |                          | PDZ domain-containing protein                                      |
| maker-5-augustus-gene-266.6-mRNA-1  | Indica | Indica   |               | Os05g0514500 | OsR498G0511177100.01.T01 |                                                                    |
| maker-5-augustus-gene-27.65-mRNA-1  | Indica | NA       |               |              | OsR498G0509732600.01.T01 | BRCT domain-containing DNA repair protein                          |
| maker-5-augustus-gene-274.13-mRNA-1 | Indica | NA       |               | Os05g0531200 | OsR498G0511234900.01.T01 | Non-classical arabinogalactan protein 31                           |
| maker-5-augustus-gene-280.0-mRNA-1  | Indica | NA       |               |              | OsR498G0511269300.01.T01 | Transcription factor bHLH87                                        |
| maker-5-augustus-gene-280.2-mRNA-1  | Indica | Indica   |               | Os05g0541800 | OsR498G0511270300.01.T02 | Jacalin-type lectin domain-containing protein (Fragment)           |
| maker-5-augustus-gene-280.25-mRNA-1 | Indica | Indica   |               | Os01g0706500 | OsR498G0511270600.01.T01 | 60S ribosomal protein l28                                          |
| maker-5-augustus-gene-281.0-mRNA-1  | Indica | NA       |               | Os05g0543600 | OsR498G0511275900.01.T01 | Leucine-rich repeat and WD repeat-containing protein 1 (Fragment)  |
| maker-5-augustus-gene-281.18-mRNA-1 | Indica | NA       |               |              |                          | J domain-containing protein                                        |
| maker-5-augustus-gene-281.2-mRNA-1  | Indica | NA       |               | Os05g0545000 | OsR498G0511280900.01.T06 | CRAL-TRIO domain-containing protein                                |
| maker-5-augustus-gene-281.21-mRNA-1 | Indica | Indica   |               | Os01g0700200 | OsR498G0511281600.01.T02 | Brevis radix-like domain-containing protein                        |
| maker-5-augustus-gene-281.8-mRNA-1  | Indica | NA       |               | Os05g0543700 | OsR498G0511276200.01.T01 | J domain-containing protein                                        |
| maker-5-augustus-gene-282.58-mRNA-1 | Indica | Japonica |               | Os05g0545900 | OsR498G0511285100.01.T01 |                                                                    |
| maker-5-augustus-gene-282.60-mRNA-1 | Indica | NA       |               |              | OsR498G0511285500.01.T01 |                                                                    |
| maker-5-augustus-gene-282.62-mRNA-1 | Indica | NA       |               | Os07g0513300 | OsR498G0100612800.01.T01 | PMD domain-containing protein (Fragment)                           |
| maker-5-augustus-gene-282.65-mRNA-1 | Indica | NA       |               | Os05g0546600 | OsR498G0511284300.01.T01 | FHA domain-containing protein DDL                                  |
| maker-5-augustus-gene-282.67-mRNA-1 | Indica | Japonica |               | Os05g0546800 | OsR498G0511285100.01.T01 |                                                                    |
| maker-5-augustus-gene-282.72-mRNA-1 | Indica | Japonica |               | Os05g0546500 | OsR498G0511286400.01.T02 | Double-stranded DNA-binding family protein (Fragment)              |
| maker-5-augustus-gene-282.74-mRNA-1 | Indica | NA       |               | Os05g0547850 | OsR498G0511286400.01.T01 | Double-stranded DNA-binding family protein                         |
| maker-5-augustus-gene-283.0-mRNA-1  | Indica | NA       |               |              | OsR498G0511287500.01.T01 | ABC transporter B family member 9                                  |
| maker-5-augustus-gene-283.30-mRNA-1 | Indica | NA       |               | Os05g0549000 | OsR498G0511289200.01.T02 | ENTH domain-containing protein                                     |
| maker-5-augustus-gene-283.37-mRNA-1 | Indica | NA       | Kinase-TM     | Os05g0549100 | OsR498G0511289600.01.T01 | Serine/threonine-protein kinase SNT7                               |
| maker-5-augustus-gene-283.4-mRNA-1  | Indica | NA       |               |              | OsR498G0511287900.01.T01 | ABC transporter B family member 9                                  |
| maker-5-augustus-gene-284.29-mRNA-1 | Indica | NA       | Kinase-TM     |              | OsR498G0511296500.01.T02 | Wall-associated kinase                                             |
| maker-5-augustus-gene-284.33-mRNA-1 | Indica | NA       |               |              |                          | RING finger and CHY zinc finger domain-containing protein 1        |
| maker-5-augustus-gene-284.53-mRNA-1 | Indica | NA       |               | Os05g0551350 |                          | Formin-like protein 5                                              |
| maker-5-augustus-gene-284.55-mRNA-1 | Indica | NA       |               | Os05g0551500 | OsR498G0511300200.01.T01 |                                                                    |
| maker-5-augustus-gene-285.33-mRNA-1 | Indica | NA       |               | Os05g0551600 | OsR498G0511300500.01.T01 | Formin-like protein 18                                             |

|                                     |        |          |           |              |                          |                                                                               |
|-------------------------------------|--------|----------|-----------|--------------|--------------------------|-------------------------------------------------------------------------------|
| maker-5-augustus-gene-285.36-mRNA-1 | Indica | NA       |           | Os05g0552400 | OsR498G0511303700.01.T02 | RING-CH-type domain-containing protein (Fragment)                             |
| maker-5-augustus-gene-286.17-mRNA-1 | Indica | NA       |           | Os05g0554500 | OsR498G0511313100.01.T02 | CDP-diacylglycerol--serine O-phosphatidyltransferase 2                        |
| maker-5-augustus-gene-286.26-mRNA-1 | Indica | NA       |           | Os05g0555000 | OsR498G0511315400.01.T01 |                                                                               |
| maker-5-augustus-gene-286.7-mRNA-1  | Indica | Indica   |           | Os01g0684900 | OsR498G0511311900.01.T01 | Protein DETOXIFICATION                                                        |
| maker-5-augustus-gene-287.38-mRNA-1 | Indica | NA       |           | Os05g0556000 | OsR498G0511319100.01.T01 | Oxoglutarate/iron-dependent dioxygenase                                       |
| maker-5-augustus-gene-287.48-mRNA-1 | Indica | Japonica |           | Os05g0556500 | OsR498G0511320500.01.T02 | Mediator of RNA polymerase II transcription subunit 1-like                    |
| maker-5-augustus-gene-287.65-mRNA-1 | Indica | NA       |           |              | OsR498G0511323500.01.T03 | ARM repeat superfamily protein (Fragment)                                     |
| maker-5-augustus-gene-287.68-mRNA-1 | Indica | NA       |           | Os05g0556100 | OsR498G0511319400.01.T01 | Dynamin-related protein 5A                                                    |
| maker-5-augustus-gene-288.38-mRNA-1 | Indica | NA       |           | Os05g0558400 | OsR498G0511327300.01.T04 | Branched-chain-amino-acid aminotransferase                                    |
| maker-5-augustus-gene-288.69-mRNA-1 | Indica | NA       |           | Os05g0558900 | OsR498G0511329100.01.T01 | Phenylalanine--tRNA ligase beta subunit cytoplasmic                           |
| maker-5-augustus-gene-288.74-mRNA-1 | Indica | NA       |           | Os05g0557600 | OsR498G0511324400.01.T01 | Ubiquitin-conjugating enzyme                                                  |
| maker-5-augustus-gene-288.79-mRNA-1 | Indica | NA       |           |              | OsR498G0511325000.01.T01 | probable ubiquitin-conjugating enzyme E2 24 isoform X3                        |
| maker-5-augustus-gene-288.81-mRNA-1 | Indica | NA       |           | Os05g0557800 | OsR498G0511325400.01.T01 | Large subunit ribosomal protein L21                                           |
| maker-5-augustus-gene-288.85-mRNA-1 | Indica | NA       |           | Os05g0557900 | OsR498G0511325600.01.T03 | Alpha/beta-Hydrolases superfamily protein (Fragment)                          |
| maker-5-augustus-gene-289.31-mRNA-1 | Indica | NA       |           | Os05g0559600 | OsR498G0511331900.01.T02 | Glycosyltransferases                                                          |
| maker-5-augustus-gene-289.34-mRNA-1 | Indica | NA       |           | Os05g0560000 | OsR498G0511332700.01.T01 | Photosystem I reaction center subunit VI like                                 |
| maker-5-augustus-gene-289.50-mRNA-1 | Indica | NA       |           | Os05g0559900 | OsR498G0511332400.01.T05 | Golgin candidate 5                                                            |
| maker-5-augustus-gene-289.56-mRNA-1 | Indica | NA       |           | Os05g0560100 | OsR498G0511333400.01.T01 | PRONE domain                                                                  |
| maker-5-augustus-gene-289.59-mRNA-1 | Indica | NA       | Kinase-TM | Os05g0560300 | OsR498G0511334000.01.T02 | Protein MALE DISCOVERER 1                                                     |
| maker-5-augustus-gene-290.0-mRNA-1  | Indica | Indica   |           | Os05g0561600 | OsR498G0511339900.01.T01 | Hydroxyproline-rich glycoprotein family protein                               |
| maker-5-augustus-gene-290.13-mRNA-1 | Indica | NA       |           | Os05g0562200 | OsR498G0511341400.01.T01 | Drought-induced 19                                                            |
| maker-5-augustus-gene-290.17-mRNA-1 | Indica | NA       |           | Os05g0562300 | OsR498G0511341800.01.T01 | Chaperone protein dnaJ 3                                                      |
| maker-5-augustus-gene-290.19-mRNA-1 | Indica | Indica   |           | Os05g0562400 | OsR498G0511342000.01.T01 | Putative homeodomain-like transcription factor superfamily protein (Fragment) |
| maker-5-augustus-gene-290.2-mRNA-1  | Indica | NA       |           | Os05g0560900 | OsR498G0511337200.01.T01 | Gibberellin 2-beta-dioxygenase                                                |
| maker-5-augustus-gene-290.4-mRNA-1  | Indica | NA       |           |              |                          | 3-deoxy-manno-octulosonate cytidylyltransferase, mitochondrial                |
| maker-5-augustus-gene-290.7-mRNA-1  | Indica | NA       |           |              | OsR498G0511340800.01.T01 |                                                                               |
| maker-5-augustus-gene-290.9-mRNA-1  | Indica | NA       |           |              | OsR498G0511341200.01.T03 | zf-Di19 domain-containing protein                                             |
| maker-5-augustus-gene-291.0-mRNA-1  | Indica | NA       |           | Os05g0563000 | OsR498G0511343100.01.T01 | NAC domain-containing protein 8                                               |
| maker-5-augustus-gene-291.13-mRNA-1 | Indica | NA       |           |              | OsR498G0511346000.01.T01 | E3 SUMO-protein like                                                          |
| maker-5-augustus-gene-291.17-mRNA-1 | Indica | NA       |           |              | OsR498G0511348000.01.T06 |                                                                               |
| maker-5-augustus-gene-291.2-mRNA-1  | Indica | NA       |           | Os05g0563400 | OsR498G0511345700.01.T09 | Auxin response factor                                                         |
| maker-5-augustus-gene-291.9-mRNA-1  | Indica | NA       |           |              | OsR498G0511343400.01.T01 | GB1/RHD3-type G domain-containing protein                                     |
| maker-5-augustus-gene-292.0-mRNA-1  | Indica | NA       |           | Os05g0564300 | OsR498G0511348700.01.T04 | E3 ubiquitin-protein ligase arkadia isoform X2                                |
| maker-5-augustus-gene-292.10-mRNA-1 | Indica | NA       |           | Os05g0565000 | OsR498G0511350900.01.T01 | Urease accessory protein G                                                    |
| maker-5-augustus-gene-292.13-mRNA-1 | Indica | NA       |           | Os05g0565100 | OsR498G0511351300.01.T01 | Cytochrome b561 domain-containing protein                                     |
| maker-5-augustus-gene-292.15-mRNA-1 | Indica | NA       |           | Os05g0565200 | OsR498G0511351500.01.T01 | cobW domain-containing protein (Fragment)                                     |
| maker-5-augustus-gene-292.18-mRNA-1 | Indica | Japonica |           | Os05g0565900 | OsR498G0511354100.01.T01 | WRKY transcription factor                                                     |
| maker-5-augustus-gene-292.21-mRNA-1 | Indica | NA       |           | Os05g0564400 | OsR498G0511349200.01.T01 | Ran GTPase                                                                    |
| maker-5-augustus-gene-292.4-mRNA-1  | Indica | Indica   |           | Os05g0564500 | OsR498G0511349700.01.T01 | Homeobox domain                                                               |
| maker-5-augustus-gene-292.7-mRNA-1  | Indica | NA       |           |              | OsR498G0511350700.01.T01 | Hydroxyacylglutathione hydrolase 3, mitochondrial                             |
| maker-5-augustus-gene-293.41-mRNA-1 | Indica | NA       |           |              | OsR498G0511354700.01.T01 | Ribosome maturation factor rimM                                               |
| maker-5-augustus-gene-293.45-mRNA-1 | Indica | NA       |           | Os02g0102850 | OsR498G0612917800.01.T09 |                                                                               |
| maker-5-augustus-gene-293.47-mRNA-1 | Indica | NA       |           | Os05g0566900 | OsR498G0511357700.01.T03 | GBF-interacting protein 1                                                     |
| maker-5-augustus-gene-293.53-mRNA-1 | Indica | NA       |           | Os05g0567100 |                          | Aspartic acid protease                                                        |
| maker-5-augustus-gene-293.55-mRNA-1 | Indica | NA       |           |              | OsR498G0511358500.01.T01 | WRKY transcription factor                                                     |
| maker-5-augustus-gene-293.57-mRNA-1 | Indica | NA       |           | Os05g0567400 | OsR498G0511358900.01.T01 | Putative rRNA methyltransferase                                               |
| maker-5-augustus-gene-293.62-mRNA-1 | Indica | NA       |           |              | OsR498G0511359700.01.T04 | MFS domain-containing protein (Fragment)                                      |
| maker-5-augustus-gene-293.67-mRNA-1 | Indica | NA       |           | Os05g0567800 | OsR498G0511360100.01.T04 | Sugar transporter protein ERD6-S                                              |
| maker-5-augustus-gene-293.78-mRNA-1 | Indica | Indica   |           | Os05g0566600 | OsR498G0511356200.01.T03 | Endosulphine                                                                  |
| maker-5-augustus-gene-293.80-mRNA-1 | Indica | NA       |           | Os05g0566800 | OsR498G0511356600.01.T02 | Cold-regulated inner membrane protein 2, chloroplastic                        |
| maker-5-augustus-gene-293.83-mRNA-1 | Indica | NA       |           |              | OsR498G0511358800.01.T01 | GTP-binding protein era, putative                                             |
| maker-5-augustus-gene-294.44-mRNA-1 | Indica | NA       |           | Os05g0568100 | OsR498G0511362900.01.T01 | Iron-sulfur cluster assembly protein 1                                        |
| maker-5-augustus-gene-294.48-mRNA-1 | Indica | NA       |           | Os05g0568200 | OsR498G0511363300.01.T01 | MYB-related transcription factor                                              |
| maker-5-augustus-gene-294.50-mRNA-1 | Indica | NA       |           | Os05g0569200 | OsR498G0511366100.01.T01 | Multidrug resistance-associated protein 14 isoform 1                          |
| maker-5-augustus-gene-294.52-mRNA-1 | Indica | NA       |           | Os05g0569300 | OsR498G0511366500.01.T01 | G-box binding factor                                                          |
| maker-5-augustus-gene-294.58-mRNA-1 | Indica | Indica   |           | Os01g0658700 | OsR498G0511367100.01.T01 | Glucose-6-phosphate 1-epimerase                                               |
| maker-5-augustus-gene-294.62-mRNA-1 | Indica | NA       |           | Os05g0569500 | OsR498G0511367500.01.T01 | Oil body-associated protein like                                              |
| maker-5-augustus-gene-294.64-mRNA-1 | Indica | Indica   |           | Os01g0662800 | OsR498G0511360600.01.T01 | GATA transcription factor 19                                                  |
| maker-5-augustus-gene-294.66-mRNA-1 | Indica | NA       |           | Os05g0568900 | OsR498G0511365200.01.T02 | DegP protease 1 isoform 1                                                     |
| maker-5-augustus-gene-294.71-mRNA-1 | Indica | NA       |           |              |                          |                                                                               |
| maker-5-augustus-gene-294.74-mRNA-1 | Indica | Indica   |           | Os05g0569700 | OsR498G0511370300.01.T01 | CTP synthase (glutamine hydrolyzing)                                          |

|                                     |        |          |           |              |                          |                                                                      |
|-------------------------------------|--------|----------|-----------|--------------|--------------------------|----------------------------------------------------------------------|
| maker-5-augustus-gene-295.11-mRNA-1 | Indica | NA       |           | Os05g0570900 | OsR498G0511371400.01.T01 | Phytoecyanin domain-containing protein (Fragment)                    |
| maker-5-augustus-gene-295.13-mRNA-1 | Indica | NA       |           | Os05g0571000 | OsR498G0511371600.01.T02 | Protein SUPPRESSOR OF PHVA-105 1                                     |
| maker-5-augustus-gene-295.2-mRNA-1  | Indica | NA       |           |              |                          | B-block binding subunit of TFIIC                                     |
| maker-5-augustus-gene-295.4-mRNA-1  | Indica | NA       |           | Os05g0569800 | OsR498G0511368600.01.T02 | THO complex subunit 7                                                |
| maker-5-augustus-gene-295.6-mRNA-1  | Indica | Indica   |           | Os05g0573300 | OsR498G0511370300.01.T01 | CTP synthase                                                         |
| maker-5-augustus-gene-296.37-mRNA-1 | Indica | NA       |           | Os05g0573200 | OsR498G0511377300.01.T04 | Isocitrate dehydrogenase [NADP]                                      |
| maker-5-augustus-gene-296.53-mRNA-1 | Indica | NA       |           | Os05g0572700 | OsR498G0511375800.01.T01 | Protein-serine/threonine phosphatase                                 |
| maker-5-augustus-gene-296.56-mRNA-1 | Indica | Indica   |           | Os05g0573000 | OsR498G0511376800.01.T01 |                                                                      |
| maker-5-augustus-gene-296.60-mRNA-1 | Indica | NA       |           | Os05g0573300 | OsR498G0511377600.01.T02 | CTP synthase                                                         |
| maker-5-augustus-gene-297.46-mRNA-1 | Indica | NA       |           | Os05g0573500 | OsR498G0511379100.01.T02 | CCAAT-binding transcription factor A                                 |
| maker-5-augustus-gene-297.51-mRNA-1 | Indica | Indica   |           | Os05g0574000 | OsR498G0511381100.01.T01 | Phospholipase                                                        |
| maker-5-augustus-gene-297.53-mRNA-1 | Indica | Japonica |           | Os05g0574800 | OsR498G0511385100.01.T01 | Pentatricopeptide repeat-containing protein chloroplastic            |
| maker-5-augustus-gene-297.54-mRNA-1 | Indica | Indica   |           | Os05g0575300 | OsR498G0511387900.01.T01 | Tr-type G domain-containing protein                                  |
| maker-5-augustus-gene-297.65-mRNA-1 | Indica | NA       |           | Os05g0573700 | OsR498G0511380000.01.T01 | Acetohydroxy-acid reductoisomerase                                   |
| maker-5-augustus-gene-297.70-mRNA-1 | Indica | NA       |           |              | OsR498G0511380600.01.T02 | Tetratricopeptide repeat-like superfamily protein isoform 2          |
| maker-5-augustus-gene-297.74-mRNA-1 | Indica | NA       |           | Os05g0574100 | OsR498G0511381600.01.T01 | Phospholipase A1-Ilgamma                                             |
| maker-5-augustus-gene-297.76-mRNA-1 | Indica | NA       |           | Os05g0574400 | OsR498G0511383800.01.T01 | Malate dehydrogenase                                                 |
| maker-5-augustus-gene-297.79-mRNA-1 | Indica | NA       |           | Os05g0574500 | OsR498G0511384000.01.T01 | GTP-binding nuclear protein Ran-2                                    |
| maker-5-augustus-gene-297.82-mRNA-1 | Indica | NA       |           | Os05g0574700 | OsR498G0511384800.01.T04 | Very-long-chain 3-oxoacyl-CoA synthase                               |
| maker-5-augustus-gene-298.40-mRNA-1 | Indica | NA       | Kinase-TM | Os05g0576800 | OsR498G0511392300.01.T01 | Mitogen-activated protein kinase                                     |
| maker-5-augustus-gene-298.45-mRNA-1 | Indica | NA       |           | Os05g0578000 | OsR498G0511395300.01.T01 | Peroxin-14                                                           |
| maker-5-augustus-gene-298.51-mRNA-1 | Indica | NA       |           |              | OsR498G0511391200.01.T01 | Fe2OG dioxygenase domain-containing protein (Fragment)               |
| maker-5-augustus-gene-298.53-mRNA-1 | Indica | Indica   |           | Os01g0643300 | OsR498G0511393400.01.T01 | Auxin efflux carrier component                                       |
| maker-5-augustus-gene-298.55-mRNA-1 | Indica | Indica   |           | Os05g0577200 | OsR498G0511394200.01.T05 | Isoprenylcysteine alpha-carbonyl methylesterase ICME                 |
| maker-5-augustus-gene-298.59-mRNA-1 | Indica | NA       | Kinase-TM | Os05g0577700 | OsR498G0511394600.01.T02 | MAP kinase kinase kinase55                                           |
| maker-5-augustus-gene-298.68-mRNA-1 | Indica | NA       |           | Os05g0577900 | OsR498G0511395200.01.T01 | Protein kinase domain-containing protein                             |
| maker-5-augustus-gene-299.16-mRNA-1 | Indica | Indica   |           | Os05g0578600 | OsR498G0511397800.01.T02 | Polygalacturonase                                                    |
| maker-5-augustus-gene-299.20-mRNA-1 | Indica | NA       |           | Os05g0579000 | OsR498G0511399000.01.T02 | Sugar transporter protein ERD6-5                                     |
| maker-5-augustus-gene-299.3-mRNA-1  | Indica | NA       |           |              | OsR498G0511397900.01.T05 |                                                                      |
| maker-5-augustus-gene-36.46-mRNA-1  | Indica | NA       |           | Os05g0161800 | OsR498G0509794300.01.T01 | GTP diphosphokinase                                                  |
| maker-5-augustus-gene-36.65-mRNA-1  | Indica | NA       |           |              | OsR498G0509796800.01.T01 | HTH myb-type domain-containing protein                               |
| maker-5-augustus-gene-37.3-mRNA-1   | Indica | NA       |           | Os05g0164100 | OsR498G0509801900.01.T06 | 6-phosphofructo-2-kinase/fructose-26-bisphosphatase                  |
| maker-5-augustus-gene-45.13-mRNA-1  | Indica | Indica   |           | Os05g0173500 | OsR498G0509840800.01.T04 |                                                                      |
| maker-5-augustus-gene-45.25-mRNA-1  | Indica | NA       |           | Os05g0176500 | OsR498G0509848400.01.T02 | Mitochondria isoform 2                                               |
| maker-5-augustus-gene-45.7-mRNA-1   | Indica | NA       |           |              |                          |                                                                      |
| maker-5-augustus-gene-46.49-mRNA-1  | Indica | NA       |           | Os05g0178600 | OsR498G0509854200.01.T01 | Auxin-responsive protein (Fragment)                                  |
| maker-5-augustus-gene-55.0-mRNA-1   | Indica | NA       |           | Os09g0258800 |                          | Ulp1 protease family, C-terminal catalytic domain containing protein |
| maker-5-augustus-gene-57.0-mRNA-1   | Indica | Indica   |           | Os05g0194900 | OsR498G0509918900.01.T01 | ATP-dependent 6-phosphofructokinase 3                                |
| maker-5-augustus-gene-57.6-mRNA-1   | Indica | NA       |           |              |                          | Probable tRNA N6-adenosine threonylcarbamoyltransferase              |
| maker-5-augustus-gene-57.8-mRNA-1   | Indica | NA       |           | Os05g0195700 | OsR498G0509922600.01.T02 | Transcription factor DIVARICATA                                      |
| maker-5-augustus-gene-63.31-mRNA-1  | Indica | NA       |           |              |                          |                                                                      |
| maker-5-augustus-gene-64.34-mRNA-1  | Indica | NA       |           | Os05g0204600 | OsR498G0509981100.01.T01 | B-box zinc finger protein 22                                         |
| maker-5-augustus-gene-64.36-mRNA-1  | Indica | NA       |           | Os05g0204900 | OsR498G0509982500.01.T03 | Serine/threonine-protein phosphatase 5                               |
| maker-5-augustus-gene-64.46-mRNA-1  | Indica | Indica   |           | Os02g0232900 | OsR498G0509982800.01.T01 | Aquaporin NIP-type                                                   |
| maker-5-augustus-gene-66.35-mRNA-1  | Indica | NA       |           | Os05g0207900 | OsR498G0509992300.01.T03 | Sentrin-specific protease 6                                          |
| maker-5-augustus-gene-66.41-mRNA-1  | Indica | NA       |           | Os05g0208000 | OsR498G0509992900.01.T01 | Mitochondrial dicarboxylate/tricarboxylate transporter DTC           |
| maker-5-augustus-gene-66.46-mRNA-1  | Indica | NA       |           |              |                          | NAM-associated domain-containing protein                             |
| maker-5-augustus-gene-66.49-mRNA-1  | Indica | NA       |           | Os05g0207400 | OsR498G0509990800.01.T01 | RING-CH-type domain-containing protein (Fragment)                    |
| maker-5-augustus-gene-66.51-mRNA-1  | Indica | NA       | Kinase-TM | Os05g0207500 | OsR498G0509991200.01.T01 | Non-specific serine/threonine protein kinase                         |
| maker-5-augustus-gene-66.56-mRNA-1  | Indica | NA       | Kinase-TM | Os05g0207700 | OsR498G0509991800.01.T03 | Serine/threonine-protein kinase CDL1                                 |
| maker-5-augustus-gene-70.0-mRNA-1   | Indica | NA       |           | Os05g0213500 | OsR498G0510012300.01.T01 | Absciscic acid receptor 8                                            |
| maker-5-augustus-gene-71.26-mRNA-1  | Indica | Indica   |           | Os05g0214900 | OsR498G0510020300.01.T01 | Protein trichome birefringence-like 25                               |
| maker-5-augustus-gene-71.29-mRNA-1  | Indica | Indica   |           | Os05g0215000 | OsR498G0510022000.01.T01 | BURP domain-containing protein 2                                     |
| maker-5-augustus-gene-72.0-mRNA-1   | Indica | NA       |           | Os05g0217800 | OsR498G0510033900.01.T01 | BURP domain-containing protein 2                                     |
| maker-5-augustus-gene-72.2-mRNA-1   | Indica | NA       |           | Os05g0215800 | OsR498G0510026400.01.T02 | Nucleotide sugar transporter-KT 1                                    |
| maker-5-augustus-gene-72.7-mRNA-1   | Indica | Japonica |           | Os05g0217000 | OsR498G0612586700.01.T02 | Arabinogalactan peptide                                              |
| maker-5-augustus-gene-73.26-mRNA-1  | Indica | Indica   | Kinase-TM | Os01g0227200 | OsR498G0510036200.01.T03 | Receptor protein kinase PERK1                                        |
| maker-5-augustus-gene-73.31-mRNA-1  | Indica | Indica   |           | Os01g0303800 | OsR498G0510635800.01.T01 | Usp domain-containing protein                                        |
| maker-5-augustus-gene-74.40-mRNA-1  | Indica | NA       |           | Os05g0220900 | OsR498G0510046700.01.T01 |                                                                      |
| maker-5-augustus-gene-74.44-mRNA-1  | Indica | NA       |           |              | OsR498G0510043000.01.T02 | DNA helicase                                                         |
| maker-5-augustus-gene-74.48-mRNA-1  | Indica | NA       |           | Os05g0219900 | OsR498G0510043600.01.T01 | S-type anion channel SLAH3                                           |



|                                     |        |          |               |              |                          |                                                                              |
|-------------------------------------|--------|----------|---------------|--------------|--------------------------|------------------------------------------------------------------------------|
| maker-5-augustus-gene-74.50-mRNA-1  | Indica | NA       |               | Os05g0220100 | OsR498G0510044200.01.T04 | Post-GPI attachment to proteins factor 3                                     |
| maker-5-augustus-gene-74.58-mRNA-1  | Indica | Indica   |               | Os01g0750500 | OsR498G0510048200.01.T01 | Coiled-coil domain-containing protein 25                                     |
| maker-5-augustus-gene-75.36-mRNA-1  | Indica | Indica   |               | Os05g0223200 | OsR498G0510053900.01.T01 | Glycine-rich RNA-binding protein GRP1A                                       |
| maker-5-augustus-gene-75.42-mRNA-1  | Indica | NA       | NBS-TM        | Os05g0222200 | OsR498G0510052200.01.T01 | Eceriferum 5 (Fragment)                                                      |
| maker-5-augustus-gene-79.41-mRNA-1  | Indica | Japonica |               | Os05g0229300 | OsR498G0815323400.01.T01 |                                                                              |
| maker-6-augustus-gene-100.8-mRNA-1  | Indica | NA       |               | Os06g0286146 | OsR498G0612156000.01.T01 | PGG domain-containing protein (Fragment)                                     |
| maker-6-augustus-gene-101.19-mRNA-1 | Indica | Indica   |               | Os06g0286310 | OsR498G0612158300.01.T01 | DNA oxidative demethylase                                                    |
| maker-6-augustus-gene-101.30-mRNA-1 | Indica | NA       |               | Os10g0531750 | OsR498G0408675500.01.T01 | Retrotransposon protein, putative, Ty3-gypsy sub-class                       |
| maker-6-augustus-gene-102.41-mRNA-1 | Indica | NA       | CC-NBS-TM     |              |                          | NBS-LRR                                                                      |
| maker-6-augustus-gene-102.42-mRNA-1 | Indica | NA       | NBS-TM        |              |                          | Disease resistance protein RPM1                                              |
| maker-6-augustus-gene-105.5-mRNA-1  | Indica | Japonica |               | Os06g0293500 | OsR498G0612176400.01.T01 |                                                                              |
| maker-6-augustus-gene-110.30-mRNA-1 | Indica | NA       |               | Os06g0301300 | OsR498G0612205500.01.T05 | Proteasome activator subunit 4                                               |
| maker-6-augustus-gene-195.22-mRNA-1 | Indica | NA       |               | Os06g0527800 |                          | Bet v I allergen-like                                                        |
| maker-6-augustus-gene-197.0-mRNA-1  | Indica | Indica   |               | Os06g0530300 | OsR498G0612674500.01.T01 | Putative membrane protein YuiD                                               |
| maker-6-augustus-gene-202.48-mRNA-1 | Indica | Indica   |               | Os02g0244600 | OsR498G0612706500.01.T01 | Polyadenylate-binding protein-interacting protein 8-like                     |
| maker-6-augustus-gene-204.31-mRNA-1 | Indica | NA       |               | Os06g0545400 | OsR498G0612717800.01.T01 | Group 13 grass pollen allergen (Fragment)                                    |
| maker-6-augustus-gene-205.52-mRNA-1 | Indica | NA       |               | Os06g0547100 | OsR498G0612720200.01.T01 | Peroxidase                                                                   |
| maker-6-augustus-gene-227.0-mRNA-1  | Indica | Indica   | Kinase-LRR-TM | Os06g0586150 | OsR498G0612844500.01.T01 | Putative LRR receptor-like serine/threonine-protein kinase                   |
| maker-6-augustus-gene-227.3-mRNA-1  | Indica | Indica   | Kinase-LRR-TM | Os06g0587500 | OsR498G0612845300.01.T01 | Putative LRR receptor-like serine/threonine-protein kinase                   |
| maker-6-augustus-gene-228.1-mRNA-1  | Indica | NA       | Kinase-LRR-TM |              | OsR498G0612847900.01.T01 | Putative LRR receptor-like serine/threonine-protein kinase                   |
| maker-6-augustus-gene-231.7-mRNA-1  | Indica | Indica   | Kinase-LRR-TM | Os06g0587900 | OsR498G0612839000.01.T02 | Putative LRR receptor-like serine/threonine-protein kinase                   |
| maker-6-augustus-gene-234.11-mRNA-1 | Indica | Indica   |               | Os06g0594600 | OsR498G0612877000.01.T03 | 3'-N-debenzoyl-2'-deoxytaxol N-benzoyltransferase                            |
| maker-6-augustus-gene-236.36-mRNA-1 | Indica | Indica   |               | Os06g0597400 | OsR498G0612883100.01.T02 | Exonuclease/helicase-like                                                    |
| maker-6-augustus-gene-236.44-mRNA-1 | Indica | NA       |               | Os06g0597600 | OsR498G0612883500.01.T01 | FscO                                                                         |
| maker-6-augustus-gene-236.48-mRNA-1 | Indica | NA       |               | Os06g0597900 | OsR498G0612883900.01.T04 | Heme-binding-like protein, chloroplastic                                     |
| maker-6-augustus-gene-236.51-mRNA-1 | Indica | NA       |               | Os06g0598900 | OsR498G0612886000.01.T01 | serine-threonine kinase receptor-associated protein isoform X1               |
| maker-6-augustus-gene-257.3-mRNA-1  | Indica | Indica   |               | Os06g0632200 | OsR498G0613011200.01.T02 | Tryptophan synthase                                                          |
| maker-6-augustus-gene-258.44-mRNA-1 | Indica | NA       |               |              | OsR498G0613013000.01.T01 | Putative B3 domain-containing protein (Fragment)                             |
| maker-6-augustus-gene-293.47-mRNA-1 | Indica | Indica   |               | Os02g0150100 | OsR498G0613241100.01.T01 | Putative RNA helicase transcription factor interactor and regulator CCHC(Zn) |
| maker-6-augustus-gene-293.49-mRNA-1 | Indica | NA       |               | Os06g0697300 | OsR498G0613241500.01.T01 |                                                                              |
| maker-6-augustus-gene-293.54-mRNA-1 | Indica | Indica   |               | Os03g0845700 | OsR498G0613241800.01.T01 | DNA-directed RNA polymerases II, IV and V subunit 8B                         |
| maker-6-augustus-gene-294.50-mRNA-1 | Indica | NA       |               |              | OsR498G0613245200.01.T02 | Protein ENHANCED DISEASE RESISTANCE like                                     |
| maker-6-augustus-gene-295.19-mRNA-1 | Indica | NA       |               | Os06g0699500 | OsR498G0613249800.01.T01 | Macrophage migration inhibitory factor isogeny                               |
| maker-6-augustus-gene-296.41-mRNA-1 | Indica | NA       |               | Os06g0701400 | OsR498G0613255600.01.T01 | 60s acidic ribosomal protein-domain-containing protein                       |
| maker-6-augustus-gene-296.46-mRNA-1 | Indica | NA       |               | Os06g0701700 | OsR498G0613256600.01.T01 | HKT24 transporter                                                            |
| maker-6-augustus-gene-297.40-mRNA-1 | Indica | NA       |               |              | OsR498G0613262500.01.T01 |                                                                              |
| maker-6-augustus-gene-297.42-mRNA-1 | Indica | Indica   |               | Os06g0701700 | OsR498G0613258400.01.T02 | High-affinity potassium uptake transporter                                   |
| maker-6-augustus-gene-297.46-mRNA-1 | Indica | NA       |               | Os11g0620500 | OsR498G0510972100.01.T01 | Plant disease resistance polyprotein-like                                    |
| maker-6-augustus-gene-298.0-mRNA-1  | Indica | NA       |               | Os06g0702500 | OsR498G0613263100.01.T06 | L-arabinokinase                                                              |
| maker-6-augustus-gene-298.12-mRNA-1 | Indica | NA       |               | Os06g0702800 | OsR498G0613265100.01.T03 | 3-phosphoinositide-dependent protein kinase-1                                |
| maker-6-augustus-gene-298.22-mRNA-1 | Indica | NA       |               | Os06g0702700 | OsR498G0613265000.01.T01 | GGACT domain-containing protein (Fragment)                                   |
| maker-6-augustus-gene-298.25-mRNA-1 | Indica | NA       | Kinase-TM     | Os06g0703000 | OsR498G0613265800.01.T01 | Putative serine/threonine-protein kinase PBL17 isoform B                     |
| maker-6-augustus-gene-298.32-mRNA-1 | Indica | NA       |               | Os06g0703500 | OsR498G0613267000.01.T02 | Squamosa-promoter binding protein-like protein                               |
| maker-6-augustus-gene-298.4-mRNA-1  | Indica | Indica   |               | Os06g0702600 | OsR498G0613264700.01.T02 | Auxin response factor                                                        |
| maker-6-augustus-gene-299.36-mRNA-1 | Indica | Japonica |               | Os06g0703900 | OsR498G0202933000.01.T03 | Protein PHOSPHATE STARVATION RESPONSE 3                                      |
| maker-6-augustus-gene-300.44-mRNA-1 | Indica | Indica   |               | Os06g0705600 | OsR498G0613275100.01.T02 | Peptide transporter PTR1                                                     |
| maker-6-augustus-gene-300.45-mRNA-1 | Indica | NA       |               | Os06g0705600 | OsR498G0613275100.01.T03 | Peptide transporter PTR2                                                     |
| maker-6-augustus-gene-300.52-mRNA-1 | Indica | NA       |               | Os06g0705700 | OsR498G0613275500.01.T01 | Peptide transporter PTR2                                                     |
| maker-6-augustus-gene-300.54-mRNA-1 | Indica | NA       |               | Os06g0705900 | OsR498G0613276300.01.T01 | Peptide transporter PTR2                                                     |
| maker-6-augustus-gene-300.56-mRNA-1 | Indica | Indica   |               | Os06g0705700 | OsR498G0613276500.01.T06 | Peptide transporter PTR2                                                     |
| maker-6-augustus-gene-300.61-mRNA-1 | Indica | NA       |               | Os06g0707100 | OsR498G0613278300.01.T09 | Protein DETOXIFICATION                                                       |
| maker-6-augustus-gene-301.39-mRNA-1 | Indica | NA       | Kinase        | Os06g0708000 | OsR498G0613281300.01.T01 | Mitogen-activated protein kinase                                             |
| maker-6-augustus-gene-301.44-mRNA-1 | Indica | NA       |               |              | OsR498G0613282100.01.T01 | Type 2 DNA topoisomerase 6 subunit B-like                                    |
| maker-6-augustus-gene-301.51-mRNA-1 | Indica | Indica   |               | Os01g0106200 | OsR498G0613282300.01.T01 | Peptidylprolyl isomerase                                                     |
| maker-6-augustus-gene-301.53-mRNA-1 | Indica | Indica   |               | Os06g0708500 | OsR498G0613282500.01.T01 | Peptidyl-prolyl cis-trans isomerase                                          |
| maker-6-augustus-gene-301.55-mRNA-1 | Indica | NA       |               | Os06g0708500 | OsR498G0613282700.01.T01 | Peptidyl-prolyl cis-trans isomerase                                          |
| maker-6-augustus-gene-301.61-mRNA-1 | Indica | Indica   |               | Os06g0709100 | OsR498G0613284500.01.T03 | F-box protein SKIP31                                                         |
| maker-6-augustus-gene-301.67-mRNA-1 | Indica | NA       |               |              |                          | Putative isoprenylcysteine alpha-carbonyl methylesterase ICME                |
| maker-6-augustus-gene-301.71-mRNA-1 | Indica | Indica   |               | Os06g0708700 | OsR498G0613283200.01.T02 | Conserved oligomeric Golgi complex subunit 6                                 |
| maker-6-augustus-gene-301.75-mRNA-1 | Indica | NA       |               |              | OsR498G0613284200.01.T04 | Zinc finger CCHC domain-containing protein                                   |
| maker-6-augustus-gene-301.81-mRNA-1 | Indica | NA       |               | Os06g0710300 | OsR498G0613285800.01.T02 | ATP synthase gamma chain                                                     |

|                                     |        |          |               |              |                          |                                                                      |
|-------------------------------------|--------|----------|---------------|--------------|--------------------------|----------------------------------------------------------------------|
| maker-6-augustus-gene-302.38-mRNA-1 | Indica | NA       |               | Os06g0711100 | OsR498G0613287700.01.T04 | WAS/WASL-interacting protein family member 1-like                    |
| maker-6-augustus-gene-302.41-mRNA-1 | Indica | NA       |               | Os06g0711200 | OsR498G0613287900.01.T01 | Pre-mRNA-splicing factor syf2 like                                   |
| maker-6-augustus-gene-302.43-mRNA-1 | Indica | NA       |               | Os06g0711600 | OsR498G0613288100.01.T02 | GCIP-interacting family protein isoform 1                            |
| maker-6-augustus-gene-302.52-mRNA-1 | Indica | NA       |               | Os06g0712400 | OsR498G0613292600.01.T02 | NF-E2 inducible protein-like                                         |
| maker-6-augustus-gene-303.0-mRNA-1  | Indica | Indica   |               | Os09g0531900 | OsR498G0613293100.01.T01 | Hexosyltransferase                                                   |
| maker-6-augustus-gene-303.13-mRNA-1 | Indica | NA       |               | Os06g0713100 | OsR498G0613297400.01.T01 | Mitochondrion protein                                                |
| maker-6-augustus-gene-303.17-mRNA-1 | Indica | Indica   |               | Os06g0713900 | OsR498G0613298200.01.T02 |                                                                      |
| maker-6-augustus-gene-303.21-mRNA-1 | Indica | NA       |               | Os06g0714000 | OsR498G0613298600.01.T04 | Transmembrane protein                                                |
| maker-6-augustus-gene-303.3-mRNA-1  | Indica | Indica   |               | Os06g0712600 | OsR498G0613294100.01.T01 | Lateral root primordium (LRP) protein-related                        |
| maker-6-augustus-gene-303.8-mRNA-1  | Indica | NA       |               | Os06g0713800 | OsR498G0613297500.01.T02 | Alpha-amylase type A isozyme                                         |
| maker-6-augustus-gene-304.0-mRNA-1  | Indica | Indica   |               | Os10g0510700 | OsR498G0613299500.01.T02 | Calcium-dependent protein kinase                                     |
| maker-6-augustus-gene-304.13-mRNA-1 | Indica | NA       |               | Os06g0715400 | OsR498G0613303900.01.T05 | Golgin subfamily A member like                                       |
| maker-6-augustus-gene-304.15-mRNA-1 | Indica | NA       |               | Os06g0715500 | OsR498G0613303900.01.T06 | translocon-associated protein subunit alpha-like                     |
| maker-6-augustus-gene-304.20-mRNA-1 | Indica | NA       | Kinase        | Os06g0714900 | OsR498G0613302400.01.T04 | probable serine/threonine-protein kinase PBL19                       |
| maker-6-augustus-gene-304.23-mRNA-1 | Indica | NA       |               |              | OsR498G0613303400.01.T02 | Target SNARE coiled-coil domain                                      |
| maker-6-augustus-gene-304.28-mRNA-1 | Indica | NA       |               | Os06g0715300 | OsR498G0613303600.01.T02 | Endoglucanase                                                        |
| maker-6-augustus-gene-304.30-mRNA-1 | Indica | NA       |               | Os06g0715600 | OsR498G0613304200.01.T01 | BRCA1-A complex subunit BRE                                          |
| maker-6-augustus-gene-304.35-mRNA-1 | Indica | NA       |               | Os06g0715700 | OsR498G0613304400.01.T01 | Probable magnesium transporter                                       |
| maker-6-augustus-gene-304.4-mRNA-1  | Indica | NA       | TM            | Os06g0714500 | OsR498G0613301300.01.T01 | ATPase family AAA domain-containing protein 1-A                      |
| maker-6-augustus-gene-304.6-mRNA-1  | Indica | NA       |               | Os06g0714800 | OsR498G0613302100.01.T01 | FLZ-type domain-containing protein (Fragment)                        |
| maker-6-augustus-gene-304.8-mRNA-1  | Indica | NA       |               | Os06g0715000 | OsR498G0613303100.01.T02 | UV radiation resistance-associated                                   |
| maker-6-augustus-gene-305.35-mRNA-1 | Indica | NA       |               | Os06g0716000 | OsR498G0613305900.01.T01 | DUF668 domain-containing protein (Fragment)                          |
| maker-6-augustus-gene-305.40-mRNA-1 | Indica | NA       |               | Os06g0716200 | OsR498G0613306700.01.T01 | Thaumatococcus-like protein 1a                                       |
| maker-6-augustus-gene-305.43-mRNA-1 | Indica | Japonica |               | Os06g0717300 | OsR498G0613308900.01.T01 |                                                                      |
| maker-6-augustus-gene-305.48-mRNA-1 | Indica | NA       |               | Os06g0717900 |                          | Chloroplast nucleoid DNA-binding protein-like protein                |
| maker-6-augustus-gene-305.50-mRNA-1 | Indica | NA       |               | Os06g0718100 | OsR498G0613311900.01.T01 | Expansin                                                             |
| maker-6-augustus-gene-305.52-mRNA-1 | Indica | NA       |               | Os06g0716700 | OsR498G0613307600.01.T01 | Endoplasmic like                                                     |
| maker-6-augustus-gene-305.58-mRNA-1 | Indica | NA       |               | Os06g0717100 | OsR498G0613308200.01.T01 | Senescence domain-containing protein (Fragment)                      |
| maker-6-augustus-gene-305.61-mRNA-1 | Indica | NA       | Kinase-LRR-TM | Os06g0717200 | OsR498G0613308600.01.T01 | Leucine-rich repeat receptor-like kinase protein THICK TASSEL DWARF1 |
| maker-6-augustus-gene-305.63-mRNA-1 | Indica | NA       |               | Os06g0717400 | OsR498G0613309200.01.T01 | RNA pseudourine synthase 2, chloroplastic                            |
| maker-6-augustus-gene-305.67-mRNA-1 | Indica | NA       |               | Os06g0717800 | OsR498G0613310200.01.T01 | Protein-serine/threonine phosphatase                                 |
| maker-6-augustus-gene-305.68-mRNA-1 | Indica | NA       |               |              | OsR498G0613310200.01.T02 |                                                                      |
| maker-6-augustus-gene-306.33-mRNA-1 | Indica | Indica   |               | Os06g0721800 | OsR498G0613312700.01.T01 | Blue copper binding protein-like                                     |
| maker-6-augustus-gene-306.35-mRNA-1 | Indica | NA       |               |              |                          | NF-E2 inducible protein-like                                         |
| maker-6-augustus-gene-306.63-mRNA-1 | Indica | NA       |               | Os06g0722100 | OsR498G0613323500.01.T01 | DUF1618 domain-containing protein (Fragment)                         |
| maker-6-augustus-gene-307.42-mRNA-1 | Indica | NA       |               | Os06g0724100 | OsR498G0613324700.01.T01 | FYVE-type domain-containing protein (Fragment)                       |
| maker-6-augustus-gene-307.48-mRNA-1 | Indica | NA       |               | Os06g0724200 | OsR498G0613324900.01.T02 | Lateral signaling target protein 2-like protein                      |
| maker-6-augustus-gene-307.59-mRNA-1 | Indica | NA       |               | Os06g0722100 | OsR498G0613323500.01.T01 | DUF1618 domain-containing protein (Fragment)                         |
| maker-6-augustus-gene-307.63-mRNA-1 | Indica | NA       |               |              |                          | Putative retroelement                                                |
| maker-6-augustus-gene-307.66-mRNA-1 | Indica | Indica   |               | Os06g0724000 | OsR498G0613324000.01.T01 | BZIP transcription factor                                            |
| maker-6-augustus-gene-307.73-mRNA-1 | Indica | NA       |               | Os06g0724300 | OsR498G0613325200.01.T02 | DUF616 domain-containing protein                                     |
| maker-6-augustus-gene-308.21-mRNA-1 | Indica | NA       |               | Os06g0725900 | OsR498G0613331200.01.T01 | AAA domain-containing protein (Fragment)                             |
| maker-6-augustus-gene-309.0-mRNA-1  | Indica | Japonica |               | Os06g0726900 | OsR498G0613324600.01.T01 | RING-type E3 ubiquitin transferase                                   |
| maker-6-augustus-gene-309.14-mRNA-1 | Indica | NA       |               | Os06g0726400 | OsR498G0613332800.01.T02 | 1,4-alpha-glucan-branching enzyme, chloroplastic/amyloplastic        |
| maker-6-augustus-gene-309.19-mRNA-1 | Indica | NA       |               | Os06g0726600 | OsR498G0613333000.01.T01 | Lazarus                                                              |
| maker-6-augustus-gene-309.2-mRNA-1  | Indica | NA       |               | Os06g0727200 | OsR498G0613333900.01.T01 | Catalase isozyme b                                                   |
| maker-6-augustus-gene-309.24-mRNA-1 | Indica | NA       |               | Os06g0726800 | OsR498G0613333200.01.T03 | Cyclin N-terminal domain-containing protein                          |
| maker-6-augustus-gene-309.29-mRNA-1 | Indica | NA       |               | Os06g0727300 | OsR498G0613334200.01.T02 | Hexosyltransferase                                                   |
| maker-6-augustus-gene-309.34-mRNA-1 | Indica | NA       | Kinase        | Os06g0727400 | OsR498G0613334400.01.T01 | probable serine/threonine-protein kinase PIX13                       |
| maker-6-augustus-gene-309.7-mRNA-1  | Indica | Indica   |               | Os06g0727700 | OsR498G0613334900.01.T01 | Storage protein-like                                                 |
| maker-6-augustus-gene-309.9-mRNA-1  | Indica | NA       |               | Os06g0727700 | OsR498G0613335300.01.T01 | Transmembrane protein, putative (DUF707)                             |
| maker-6-augustus-gene-310.0-mRNA-1  | Indica | Indica   |               | Os06g0728000 | OsR498G0613336700.01.T02 | DNA-binding protein MNB18                                            |
| maker-6-augustus-gene-310.10-mRNA-1 | Indica | NA       |               | Os06g0728600 | OsR498G0613337900.01.T01 | Calcium-binding EF hand protein-like                                 |
| maker-6-augustus-gene-310.15-mRNA-1 | Indica | NA       |               |              |                          | Piwi domain-containing protein                                       |
| maker-6-augustus-gene-310.21-mRNA-1 | Indica | NA       |               | Os06g0728700 | OsR498G0613338800.01.T01 | HTH myb-type domain-containing protein                               |
| maker-6-augustus-gene-310.23-mRNA-1 | Indica | NA       |               |              | OsR498G0613339400.01.T02 | Callose synthase 3                                                   |
| maker-6-augustus-gene-310.30-mRNA-1 | Indica | NA       |               | Os06g0729000 | OsR498G0613340000.01.T02 | Phytoene synthase 1, chloroplastic                                   |
| maker-6-augustus-gene-310.7-mRNA-1  | Indica | Japonica |               | Os06g0728200 | OsR498G0613337300.01.T01 |                                                                      |
| maker-6-augustus-gene-311.0-mRNA-1  | Indica | NA       |               | Os06g0729400 | OsR498G0613342300.01.T03 | Gibberellin-regulated protein 3                                      |
| maker-6-augustus-gene-311.10-mRNA-1 | Indica | NA       |               | Os06g0730500 | OsR498G0613347500.01.T01 | Gamma-tubulin complex component                                      |
| maker-6-augustus-gene-311.14-mRNA-1 | Indica | NA       |               | Os06g0730800 | OsR498G0613347900.01.T01 | Coiled-coil domain-containing protein 12                             |

|                                     |        |          |               |              |                          |                                                                       |
|-------------------------------------|--------|----------|---------------|--------------|--------------------------|-----------------------------------------------------------------------|
| maker-6-augustus-gene-311.18-mRNA-1 | Indica | NA       |               |              | OsR498G0613342600.01.T05 |                                                                       |
| maker-6-augustus-gene-311.2-mRNA-1  | Indica | Indica   |               | Os02g0634700 | OsR498G0613345100.01.T01 | Carboxypeptidase                                                      |
| maker-6-augustus-gene-311.23-mRNA-1 | Indica | NA       |               |              | OsR498G0613342800.01.T03 | Photosystem II stability/assembly factor like                         |
| maker-6-augustus-gene-311.27-mRNA-1 | Indica | NA       |               | Os06g0730600 | OsR498G0613347800.01.T05 | Oligopeptidase B                                                      |
| maker-6-augustus-gene-311.4-mRNA-1  | Indica | NA       |               | Os07g0172200 | OsR498G0613346900.01.T02 | DNA-binding protein RHL1                                              |
| maker-6-augustus-gene-311.7-mRNA-1  | Indica | NA       |               | Os06g0730300 | OsR498G0613347100.01.T03 | Transmembrane protein 53                                              |
| maker-6-augustus-gene-312.44-mRNA-1 | Indica | NA       |               |              |                          | PA domain-containing protein                                          |
| maker-6-augustus-gene-312.50-mRNA-1 | Indica | NA       |               | Os06g0731000 |                          | No-mechanoreceptor potential A, putative                              |
| maker-6-augustus-gene-312.51-mRNA-1 | Indica | NA       |               | Os06g0731400 | OsR498G0613349700.01.T01 | Tetraspanin-18                                                        |
| maker-6-augustus-gene-312.55-mRNA-1 | Indica | NA       |               | Os06g0731900 | OsR498G0613351300.01.T01 | Putative lysine ketoglutarate reductase trans-splicing related 1      |
| maker-6-augustus-gene-312.62-mRNA-1 | Indica | NA       |               |              |                          | Acyl-CoA N-acyltransferase with RING/FYVE/PHD-type zinc finger domain |
| maker-6-augustus-gene-312.68-mRNA-1 | Indica | NA       |               | Os06g0731200 | OsR498G0613349200.01.T01 | White-brown complex like protein 30                                   |
| maker-6-augustus-gene-312.73-mRNA-1 | Indica | Indica   |               | Os06g0731300 | OsR498G0613349400.01.T01 | Chaperone protein like                                                |
| maker-6-augustus-gene-312.75-mRNA-1 | Indica | NA       |               | Os06g0731500 |                          | JmjC domain-containing protein                                        |
| maker-6-augustus-gene-312.77-mRNA-1 | Indica | NA       |               |              | OsR498G0613350200.01.T07 | Lysine-specific demethylase                                           |
| maker-6-augustus-gene-312.79-mRNA-1 | Indica | NA       |               | Os06g0731700 | OsR498G0613350600.01.T01 | Clathrin light chain 2                                                |
| maker-6-augustus-gene-312.83-mRNA-1 | Indica | NA       |               | Os06g0731800 | OsR498G0613351200.01.T01 | Clathrin light chain                                                  |
| maker-6-augustus-gene-32.0-mRNA-1   | Indica | NA       |               |              | OsR498G0611667500.01.T02 | FBD domain-containing protein                                         |
| maker-6-augustus-gene-35.49-mRNA-1  | Indica | NA       |               |              | OsR498G0611688900.01.T01 | X8 domain-containing protein                                          |
| maker-6-augustus-gene-36.2-mRNA-1   | Indica | NA       |               | Os06g0169900 | OsR498G0611689700.01.T01 | Jacalin-like lectin domain containing protein, expressed              |
| maker-6-augustus-gene-37.16-mRNA-1  | Indica | NA       |               | Os06g0171700 | OsR498G0611697700.01.T01 | CDK-activating kinase assembly factor MAT1                            |
| maker-6-augustus-gene-37.32-mRNA-1  | Indica | NA       |               |              |                          | Fanconi-associated nuclease                                           |
| maker-6-augustus-gene-42.10-mRNA-1  | Indica | NA       |               |              | OsR498G0611733400.01.T04 | CHD3-type chromatin-remodeling factor PICKLE                          |
| maker-6-augustus-gene-42.18-mRNA-1  | Indica | NA       |               | Os01g0258600 | OsR498G0100585300.01.T03 | FYVE-type domain-containing protein                                   |
| maker-6-augustus-gene-42.20-mRNA-1  | Indica | NA       |               | Os06g0184200 | OsR498G0611735400.01.T01 | Protein POLAR LOCALIZATION DURING ASYMMETRIC DIVISION AND REDISTR     |
| maker-6-augustus-gene-43.37-mRNA-1  | Indica | NA       |               |              | OsR498G0611737500.01.T03 | ABC transporter C family member 13 isoform A                          |
| maker-6-augustus-gene-43.46-mRNA-1  | Indica | Indica   |               | Os06g0184800 | OsR498G0611737800.01.T01 | Stress-induced hydrophobic peptide 1                                  |
| maker-6-augustus-gene-43.48-mRNA-1  | Indica | NA       |               |              | OsR498G0611738400.01.T01 | BSD domain-containing protein                                         |
| maker-6-augustus-gene-44.0-mRNA-1   | Indica | Indica   |               | Os02g0664000 | OsR498G0611740700.01.T01 | Phospholipid hydroperoxide glutathione peroxidase 1, chloroplastic    |
| maker-6-augustus-gene-44.14-mRNA-1  | Indica | NA       |               | Os06g0187000 | OsR498G0611744100.01.T03 | Origin of replication complex subunit 1                               |
| maker-6-augustus-gene-44.19-mRNA-1  | Indica | NA       |               |              | OsR498G0611744500.01.T01 | Trimethylguanosine synthase                                           |
| maker-6-augustus-gene-44.21-mRNA-1  | Indica | Indica   | Kinase-LRR-TM | Os06g0186300 | OsR498G0611741800.01.T01 | Serine/threonine protein kinase                                       |
| maker-6-augustus-gene-44.23-mRNA-1  | Indica | Japonica | Kinase-LRR-TM | Os06g0186300 | OsR498G0611742000.01.T01 | Serine/threonine protein kinase                                       |
| maker-6-augustus-gene-44.31-mRNA-1  | Indica | NA       |               | Os06g0186600 | OsR498G0611743000.01.T01 | 50S ribosomal protein L35 isoform 1                                   |
| maker-6-augustus-gene-44.35-mRNA-1  | Indica | NA       |               |              |                          | Folate-biopterin transporter                                          |
| maker-6-augustus-gene-44.38-mRNA-1  | Indica | NA       |               | Os06g0186900 | OsR498G0611743800.01.T01 | RuvB-like helicase                                                    |
| maker-6-augustus-gene-44.40-mRNA-1  | Indica | Indica   |               | Os06g0187200 | OsR498G0611744800.01.T01 | UDP-glucuronate 4-epimerase 1                                         |
| maker-6-augustus-gene-44.5-mRNA-1   | Indica | NA       | Kinase-LRR-TM |              |                          | LRR receptor-like serine/threonine-protein kinase EFR                 |
| maker-6-augustus-gene-44.8-mRNA-1   | Indica | NA       |               |              | OsR498G0611742500.01.T02 | HAUS-augmin3 domain-containing protein                                |
| maker-6-augustus-gene-45.11-mRNA-1  | Indica | NA       |               | Os06g0188100 | OsR498G0611747800.01.T02 | UDP-galactose/UDP-glucose transporter 7                               |
| maker-6-augustus-gene-45.4-mRNA-1   | Indica | Indica   |               | Os06g0188000 | OsR498G0611747500.01.T01 | Cyclic nucleotide-gated ion channel 17                                |
| maker-6-augustus-gene-46.4-mRNA-1   | Indica | NA       |               |              | OsR498G0611748600.01.T01 | PBPc domain-containing protein (Fragment)                             |
| maker-6-augustus-gene-46.5-mRNA-1   | Indica | NA       |               | Os06g0190700 | OsR498G0611753200.01.T01 | PBPc domain-containing protein                                        |
| maker-6-augustus-gene-49.0-mRNA-1   | Indica | Indica   |               | Os06g0195800 | OsR498G0611777900.01.T01 | J domain-containing protein (Fragment)                                |
| maker-6-augustus-gene-49.7-mRNA-1   | Indica | NA       |               | Os06g0195600 | OsR498G0611776200.01.T02 | Phosphoinositide phosphatase SAC2                                     |
| maker-6-augustus-gene-50.45-mRNA-1  | Indica | NA       |               |              | OsR498G0611782500.01.T05 | Auxin response factor                                                 |
| maker-6-augustus-gene-50.59-mRNA-1  | Indica | Indica   |               | Os02g0781400 | OsR498G0611782900.01.T06 | Chaperonin, chloroplastic                                             |
| maker-6-augustus-gene-50.68-mRNA-1  | Indica | Indica   |               | Os06g0196300 | OsR498G0611780000.01.T01 | Peroxisomal protein Q chloroplastic                                   |
| maker-6-augustus-gene-50.71-mRNA-1  | Indica | Japonica |               | Os06g0196500 | OsR498G0611780600.01.T01 | NTF2-domain-containing protein                                        |
| maker-6-augustus-gene-55.38-mRNA-1  | Indica | NA       |               | Os06g0207000 | OsR498G0611822700.01.T01 | Pantothenate kinase 1                                                 |
| maker-6-augustus-gene-57.0-mRNA-1   | Indica | NA       |               |              | OsR498G0611835900.01.T01 |                                                                       |
| maker-6-augustus-gene-57.14-mRNA-1  | Indica | NA       |               | Os06g0210900 | OsR498G0611839300.01.T01 | Fungal lipase-like domain containing protein                          |
| maker-6-augustus-gene-57.2-mRNA-1   | Indica | Indica   |               | Os02g0768300 | OsR498G0611836500.01.T01 |                                                                       |
| maker-6-augustus-gene-57.5-mRNA-1   | Indica | NA       |               | Os06g0210100 | OsR498G0611836900.01.T01 | Transmembrane emp24 domain-containing protein 10                      |
| maker-6-augustus-gene-57.8-mRNA-1   | Indica | NA       |               | Os06g0210200 | OsR498G0611837100.01.T01 | N-acyl-L-amino-acid amidohydrolase                                    |
| maker-6-augustus-gene-58.40-mRNA-1  | Indica | NA       |               | Os06g0211200 | OsR498G0611841300.01.T05 | ABA responsive element binding factor 1                               |
| maker-6-augustus-gene-58.45-mRNA-1  | Indica | NA       |               | Os06g0211600 | OsR498G0611842900.01.T01 | Fucosyltransferase                                                    |
| maker-6-augustus-gene-58.49-mRNA-1  | Indica | NA       |               | Os06g0211700 | OsR498G0611843200.01.T01 | Fucosyltransferase                                                    |
| maker-6-augustus-gene-59.0-mRNA-1   | Indica | NA       |               | Os06g0214100 | OsR498G0611849900.01.T01 | Apple domain-containing protein                                       |
| maker-6-augustus-gene-59.5-mRNA-1   | Indica | NA       |               |              | OsR498G0611846800.01.T01 |                                                                       |
| maker-6-augustus-gene-59.7-mRNA-1   | Indica | NA       |               |              | OsR498G0611848000.01.T01 | Protein TIC 22, chloroplastic isoform A                               |

|                                     |        |        |           |              |                          |                                                              |
|-------------------------------------|--------|--------|-----------|--------------|--------------------------|--------------------------------------------------------------|
| maker-6-augustus-gene-60.0-mRNA-1   | Indica | Indica |           | Os06g0214900 | OsR498G0611853000.01.T01 | Alternative NAD(P)H-ubiquinone oxidoreductase                |
| maker-6-augustus-gene-60.15-mRNA-1  | Indica | NA     |           | Os06g0215400 | OsR498G0611854400.01.T08 | Dipeptidyl peptidase family member 6                         |
| maker-6-augustus-gene-60.25-mRNA-1  | Indica | NA     |           | Os06g0215900 | OsR498G0611856400.01.T01 | 12-oxo-phytodienoic acid reductase                           |
| maker-6-augustus-gene-60.27-mRNA-1  | Indica | Indica |           | Os06g0216300 | OsR498G0611856600.01.T01 | 12-oxo-phytodienoic acid reductase                           |
| maker-6-augustus-gene-60.29-mRNA-1  | Indica | Indica |           | Os06g0216200 | OsR498G0611857200.01.T01 | 12-oxo-phytodienoic acid reductase                           |
| maker-6-augustus-gene-60.32-mRNA-1  | Indica | NA     |           | Os06g0216300 | OsR498G0611857600.01.T01 | 12-oxo-phytodienoic acid reductase                           |
| maker-6-augustus-gene-60.34-mRNA-1  | Indica | NA     |           | Os06g0216700 | OsR498G0611858400.01.T01 | Phytocyanin domain-containing protein                        |
| maker-6-augustus-gene-60.7-mRNA-1   | Indica | NA     |           | Os06g0215200 | OsR498G0611854200.01.T01 | Zinc finger protein ZOP1                                     |
| maker-6-augustus-gene-60.9-mRNA-1   | Indica | NA     |           | Os06g0215300 | OsR498G0611854400.01.T01 | Acylaminoacyl-peptidase1                                     |
| maker-6-augustus-gene-61.27-mRNA-1  | Indica | NA     |           | Os06g0216800 | OsR498G0611858600.01.T02 | Peptidyl-prolyl cis-trans isomerase                          |
| maker-6-augustus-gene-61.32-mRNA-1  | Indica | NA     |           | Os06g0217300 | OsR498G0611859800.01.T01 | MADS-box transcription factor 6                              |
| maker-6-augustus-gene-61.37-mRNA-1  | Indica | NA     |           |              |                          | Mediator of RNA polymerase II transcription subunit 6        |
| maker-6-augustus-gene-61.43-mRNA-1  | Indica | NA     |           |              | OsR498G0611861000.01.T05 | Kinesin-like protein KCA2                                    |
| maker-6-augustus-gene-61.50-mRNA-1  | Indica | NA     |           | Os06g0217700 | OsR498G0611862200.01.T01 | CAAD domain-containing protein (Fragment)                    |
| maker-6-augustus-gene-62.0-mRNA-1   | Indica | NA     |           |              |                          | Cyclin dependent kinase regulator                            |
| maker-6-augustus-gene-62.16-mRNA-1  | Indica | NA     |           | Os06g0218500 | OsR498G0611867000.01.T01 | DNA helicase                                                 |
| maker-6-augustus-gene-62.21-mRNA-1  | Indica | NA     |           | Os06g0218900 | OsR498G0611867800.01.T04 | LMBR1 domain-containing protein 2 isogeny A                  |
| maker-6-augustus-gene-62.4-mRNA-1   | Indica | NA     |           |              | OsR498G0611864700.01.T02 | GLABRA2 expression modulator                                 |
| maker-6-augustus-gene-62.7-mRNA-1   | Indica | NA     |           | Os06g0218600 | OsR498G0611867100.01.T01 | Phytocyanin domain-containing protein (Fragment)             |
| maker-6-augustus-gene-62.9-mRNA-1   | Indica | NA     |           |              | OsR498G0611865000.01.T03 | DnaJ-class molecular chaperone                               |
| maker-6-augustus-gene-63.0-mRNA-1   | Indica | NA     |           | Os06g0219400 | OsR498G0611869700.01.T02 | O-fucosyltransferase family protein                          |
| maker-6-augustus-gene-63.13-mRNA-1  | Indica | NA     |           | Os06g0220800 | OsR498G0611874100.01.T02 | 5'-adenylylsulfate reductase-like 3                          |
| maker-6-augustus-gene-63.16-mRNA-1  | Indica | NA     |           | Os06g0219500 | OsR498G0611870000.01.T01 | Heat shock protein, mitochondrial                            |
| maker-6-augustus-gene-63.20-mRNA-1  | Indica | NA     |           |              | OsR498G0611873600.01.T01 | RRM domain-containing protein                                |
| maker-6-augustus-gene-64.0-mRNA-1   | Indica | NA     |           | Os06g0221000 | OsR498G0611876100.01.T01 | Myb domain protein 93                                        |
| maker-6-augustus-gene-64.11-mRNA-1  | Indica | Indica |           | Os06g0222100 | OsR498G0611878400.01.T02 | Trehalose 6-phosphate phosphatase                            |
| maker-6-augustus-gene-64.3-mRNA-1   | Indica | NA     |           | Os06g0221200 | OsR498G0611877100.01.T01 | Annexin                                                      |
| maker-6-augustus-gene-64.5-mRNA-1   | Indica | Indica |           | Os05g0477800 | OsR498G0611877700.01.T01 | Sulfate transporter-like                                     |
| maker-6-augustus-gene-64.7-mRNA-1   | Indica | NA     |           | Os06g0221100 | OsR498G0611876600.01.T01 | TLDC domain-containing protein                               |
| maker-6-augustus-gene-65.3-mRNA-1   | Indica | NA     |           | Os06g0222800 | OsR498G0611882600.01.T01 | Metallophosphoesterase 1                                     |
| maker-6-augustus-gene-69.30-mRNA-1  | Indica | Indica |           | Os06g0229066 | OsR498G0611932200.01.T01 | ATP-dependent zinc metalloprotease FTSH 6 chloroplastic      |
| maker-6-augustus-gene-78.46-mRNA-1  | Indica | NA     |           | Os06g0246700 |                          | SWIM-type domain-containing protein (Fragment)               |
| maker-6-augustus-gene-80.15-mRNA-1  | Indica | Indica |           | Os06g0125200 | OsR498G0611641600.01.T03 | FLZ-type domain-containing protein (Fragment)                |
| maker-6-augustus-gene-80.17-mRNA-1  | Indica | NA     |           | Os06g0251700 | OsR498G0612011400.01.T01 | Microtubule-associated protein 70                            |
| maker-6-augustus-gene-80.8-mRNA-1   | Indica | NA     |           | Os06g0251100 | OsR498G0612010300.01.T01 | MACPF domain-containing protein                              |
| maker-6-augustus-gene-89.12-mRNA-1  | Indica | Indica |           | Os02g0731400 | OsR498G0612063600.01.T01 | Chemocyanin                                                  |
| maker-6-augustus-gene-89.14-mRNA-1  | Indica | Indica |           | Os06g0266800 | OsR498G0612064200.01.T01 | gibberellin-regulated protein 6-like                         |
| maker-6-augustus-gene-89.8-mRNA-1   | Indica | Indica |           | Os06g0265400 | OsR498G0612061600.01.T03 | BZIP transcription factor family protein isoform 1           |
| maker-6-augustus-gene-90.36-mRNA-1  | Indica | NA     |           |              | OsR498G0612070200.01.T02 | Aluminum-activated malate transporter 9                      |
| maker-6-augustus-gene-92.0-mRNA-1   | Indica | NA     |           | Os06g0270900 | OsR498G0612075300.01.T02 | T-cytoplasm male sterility restorer factor 2                 |
| maker-6-augustus-gene-92.6-mRNA-1   | Indica | NA     |           |              | OsR498G0407658300.01.T01 | Amidase domain-containing protein                            |
| maker-6-augustus-gene-94.6-mRNA-1   | Indica | NA     |           | Os06g0275600 | OsR498G0612093100.01.T03 | Transcription factor bHLH62 isoform A                        |
| maker-6-augustus-gene-97.2-mRNA-1   | Indica | NA     |           | Os06g0281300 | OsR498G0612134400.01.T01 | O-methyltransferase ZRP4                                     |
| maker-7-augustus-gene-1.34-mRNA-1   | Indica | NA     |           | Os07g0101300 |                          | BHLH domain-containing protein                               |
| maker-7-augustus-gene-1.56-mRNA-1   | Indica | NA     |           | Os07g0102500 | OsR498G0713361200.01.T01 | HTH La-type RNA-binding domain-containing protein (Fragment) |
| maker-7-augustus-gene-11.0-mRNA-1   | Indica | NA     |           |              |                          |                                                              |
| maker-7-augustus-gene-11.2-mRNA-1   | Indica | NA     |           | Os07g0128800 | OsR498G0713450900.01.T01 | Pathogenesis-related protein class 1                         |
| maker-7-augustus-gene-12.46-mRNA-1  | Indica | NA     |           | Os07g0129700 | OsR498G0713458300.01.T01 | Homeobox protein rough sheath 1                              |
| maker-7-augustus-gene-12.47-mRNA-1  | Indica | NA     |           | Os07g0129700 | OsR498G0713458300.01.T01 | Homeobox protein rough sheath 1                              |
| maker-7-augustus-gene-12.50-mRNA-1  | Indica | NA     |           | Os07g0131600 | OsR498G0713463100.01.T01 | Sugar transport protein 3                                    |
| maker-7-augustus-gene-12.52-mRNA-1  | Indica | NA     | Kinase-TM | Os07g0129800 | OsR498G0713458800.01.T01 | Putative receptor kinase Lecrk                               |
| maker-7-augustus-gene-12.54-mRNA-1  | Indica | NA     | Kinase-TM | Os07g0131000 |                          | L-type lectin-domain containing receptor kinase IV.1         |
| maker-7-augustus-gene-13.0-mRNA-1   | Indica | NA     |           | Os07g0132300 | OsR498G0713464300.01.T05 | EPIDERMAL PATTERNING FACTOR-like protein 2                   |
| maker-7-augustus-gene-13.7-mRNA-1   | Indica | NA     |           | Os07g0133500 | OsR498G0713466600.01.T01 | Formin-like protein 18                                       |
| maker-7-augustus-gene-13.9-mRNA-1   | Indica | NA     |           | Os07g0134000 | OsR498G0713468000.01.T01 | Amino acid transporter                                       |
| maker-7-augustus-gene-150.33-mRNA-1 | Indica | Indica |           | Os07g0448100 | OsR498G0714192500.01.T01 | Aquaporin                                                    |
| maker-7-augustus-gene-181.0-mRNA-1  | Indica | NA     |           | Os07g0495000 | OsR498G0714350300.01.T06 | Ureidoglycine aminohydrolase                                 |
| maker-7-augustus-gene-181.16-mRNA-1 | Indica | NA     |           | Os07g0495200 | OsR498G0714351000.01.T01 | ATPase, F1 complex, delta/epsilon subunit                    |
| maker-7-augustus-gene-181.19-mRNA-1 | Indica | Indica |           | Os07g0495300 | OsR498G0714351200.01.T03 | H+-transporting two-sector ATPase family protein             |
| maker-7-augustus-gene-181.4-mRNA-1  | Indica | NA     |           | Os07g0495100 | OsR498G0714350500.01.T01 | Casein kinase II subunit beta                                |
| maker-7-augustus-gene-181.8-mRNA-1  | Indica | NA     | Kinase    |              |                          | Receptor-like serine/threonine-protein kinase                |

|                                     |        |          |               |              |                          |                                                                           |
|-------------------------------------|--------|----------|---------------|--------------|--------------------------|---------------------------------------------------------------------------|
| maker-7-augustus-gene-182.18-mRNA-1 | Indica | NA       |               | Os07g0496600 |                          | SWIM-type domain-containing protein                                       |
| maker-7-augustus-gene-182.20-mRNA-1 | Indica | NA       |               | Os07g0496900 | OsR498G0714356900.01.T02 | 2-oxoglutarate and FeII-dependent oxygenase superfamily protein isoform 2 |
| maker-7-augustus-gene-182.24-mRNA-1 | Indica | NA       |               | Os07g0496000 | OsR498G0714353000.01.T01 | GTP-binding protein Rab6                                                  |
| maker-7-augustus-gene-182.8-mRNA-1  | Indica | NA       |               | Os07g0496200 | OsR498G0714353900.01.T01 | Malic enzyme                                                              |
| maker-7-augustus-gene-183.0-mRNA-1  | Indica | NA       |               |              | OsR498G0714357500.01.T01 | peptide-N(4)-(N-acetyl-beta- glucosaminy)l asparagine amidase             |
| maker-7-augustus-gene-183.12-mRNA-1 | Indica | NA       |               | Os07g0498900 | OsR498G0714363100.01.T01 | Protein trichome birefringence-like protein 13                            |
| maker-7-augustus-gene-183.14-mRNA-1 | Indica | NA       |               |              | OsR498G0714357200.01.T02 | CHD3-type chromatin remodeling factor D                                   |
| maker-7-augustus-gene-183.20-mRNA-1 | Indica | NA       |               | Os07g0497500 | OsR498G0714358000.01.T01 | Transcription factor like                                                 |
| maker-7-augustus-gene-183.22-mRNA-1 | Indica | NA       | Kinase-LRR-TM | Os07g0498400 | OsR498G0714359600.01.T01 | LRR receptor-like serine/threonine-protein kinase                         |
| maker-7-augustus-gene-183.24-mRNA-1 | Indica | NA       |               | Os07g0498800 | OsR498G0714362600.01.T04 | Ubiquitin-like domain-containing protein                                  |
| maker-7-augustus-gene-183.8-mRNA-1  | Indica | NA       |               |              | OsR498G0714359300.01.T02 | Excitatory amino acid transporter                                         |
| maker-7-augustus-gene-184.0-mRNA-1  | Indica | NA       |               | Os07g0499800 | OsR498G0714366700.01.T02 | RING/U-box superfamily protein                                            |
| maker-7-augustus-gene-185.37-mRNA-1 | Indica | NA       |               | Os07g0500300 | OsR498G0714368300.01.T01 | Synaptotagmin-4                                                           |
| maker-7-augustus-gene-185.41-mRNA-1 | Indica | NA       |               | Os07g0501100 | OsR498G0714371600.01.T01 | Chalcone synthase 2                                                       |
| maker-7-augustus-gene-186.28-mRNA-1 | Indica | NA       |               |              | OsR498G0714374000.01.T05 | Transmembrane E3 ubiquitin-protein ligase 1                               |
| maker-7-augustus-gene-186.34-mRNA-1 | Indica | Indica   |               | Os07g0502200 | OsR498G0714374800.01.T01 | Protein DETOXIFICATION                                                    |
| maker-7-augustus-gene-188.32-mRNA-1 | Indica | NA       |               | Os07g0506000 | OsR498G0714387600.01.T01 | Organic solute transporter subunit alpha/Transmembrane protein            |
| maker-7-augustus-gene-189.27-mRNA-1 | Indica | NA       |               | Os07g0507700 | OsR498G0714393300.01.T02 | Bromo domain-containing protein                                           |
| maker-7-augustus-gene-189.43-mRNA-1 | Indica | NA       |               |              | OsR498G0714392400.01.T02 | Targeting protein for Xklp2                                               |
| maker-7-augustus-gene-189.51-mRNA-1 | Indica | NA       | Kinase-TM     | Os07g0507300 | OsR498G0714392600.01.T04 | germinal center kinase 1 isoform X3                                       |
| maker-7-augustus-gene-189.63-mRNA-1 | Indica | NA       |               | Os07g0507600 | OsR498G0714393200.01.T03 | PMD domain-containing protein (Fragment)                                  |
| maker-7-augustus-gene-193.13-mRNA-1 | Indica | NA       |               |              | OsR498G0714420400.01.T01 | DUF629 domain-containing protein                                          |
| maker-7-augustus-gene-195.56-mRNA-1 | Indica | NA       |               | Os07g0516500 |                          | mediator of RNA polymerase II transcription subunit 15a-like              |
| maker-7-augustus-gene-201.0-mRNA-1  | Indica | NA       |               | Os07g0527000 | OsR498G0714474100.01.T01 |                                                                           |
| maker-7-augustus-gene-201.7-mRNA-1  | Indica | Japonica |               | Os07g0527600 | OsR498G0714476000.01.T01 | Putative carboxylesterase 13                                              |
| maker-7-augustus-gene-202.39-mRNA-1 | Indica | NA       |               |              | OsR498G0714478300.01.T01 | GDSL esterase/lipase                                                      |
| maker-7-augustus-gene-202.41-mRNA-1 | Indica | NA       |               |              | OsR498G0714478700.01.T01 | GDSL esterase/lipase                                                      |
| maker-7-augustus-gene-202.43-mRNA-1 | Indica | Japonica |               | Os07g0528900 | OsR498G0714480300.01.T01 | t-SNARE coiled-coil homology domain-containing protein (Fragment)         |
| maker-7-augustus-gene-202.46-mRNA-1 | Indica | NA       |               | Os07g0529600 | OsR498G0714482300.01.T01 | Thiamine thiazole synthase, chloroplastic                                 |
| maker-7-augustus-gene-203.16-mRNA-1 | Indica | NA       |               | Os07g0530100 | OsR498G0714483400.01.T01 | Tyrosyl-DNA phosphodiesterase                                             |
| maker-7-augustus-gene-203.23-mRNA-1 | Indica | NA       |               | Os07g0530400 |                          | F-box domain containing protein-like                                      |
| maker-7-augustus-gene-203.6-mRNA-1  | Indica | NA       |               |              | OsR498G0714486700.01.T01 | Peroxidase                                                                |
| maker-7-augustus-gene-203.8-mRNA-1  | Indica | NA       |               | Os07g0531400 | OsR498G0714487100.01.T01 | Peroxidase                                                                |
| maker-7-augustus-gene-205.0-mRNA-1  | Indica | NA       |               |              | OsR498G0714492700.01.T01 | Homeobox domain-containing protein (Fragment)                             |
| maker-7-augustus-gene-205.14-mRNA-1 | Indica | NA       | Kinase-TM     | Os07g0534700 | OsR498G0714497100.01.T02 | Cysteine-rich receptor-like protein kinase 25                             |
| maker-7-augustus-gene-205.2-mRNA-1  | Indica | NA       |               |              | OsR498G0714494500.01.T01 | Thylakoid lumenal 15.0 kDa protein 2 chloroplastic                        |
| maker-7-augustus-gene-205.9-mRNA-1  | Indica | NA       | Kinase-TM     |              | OsR498G0714496300.01.T01 | Receptor-like serine/threonine-protein kinase                             |
| maker-7-augustus-gene-206.10-mRNA-1 | Indica | Indica   | Kinase-TM     | Os07g0628700 | OsR498G0714502100.01.T01 | Cysteine-rich receptor-like protein kinase 8                              |
| maker-7-augustus-gene-207.46-mRNA-1 | Indica | NA       | Kinase-TM     |              | OsR498G0714502300.01.T01 | Cysteine-rich receptor-like protein kinase 8                              |
| maker-7-augustus-gene-207.58-mRNA-1 | Indica | Indica   | Kinase-TM     | Os07g0537900 | OsR498G0714507500.01.T01 | Cysteine-rich receptor-like protein kinase 8                              |
| maker-7-augustus-gene-207.71-mRNA-1 | Indica | Indica   | Kinase-TM     | Os07g0537900 | OsR498G0714504400.01.T04 | Cysteine-rich receptor-like protein kinase 8                              |
| maker-7-augustus-gene-207.76-mRNA-1 | Indica | NA       |               | Os07g0539100 | OsR498G0714508400.01.T02 | Glucan endo-1,3-beta-D-glucosidase                                        |
| maker-7-augustus-gene-207.81-mRNA-1 | Indica | NA       |               |              |                          | Glucan endo-1,3-beta-D-glucosidase                                        |
| maker-7-augustus-gene-208.36-mRNA-1 | Indica | NA       | Kinase-TM     | Os07g0541000 | OsR498G0714516300.01.T01 | Receptor-like serine-threonine protein kinase                             |
| maker-7-augustus-gene-208.38-mRNA-1 | Indica | Japonica |               | Os07g0539900 | OsR498G0714510800.01.T02 | Glucan endo-1,3-beta-D-glucosidase                                        |
| maker-7-augustus-gene-208.47-mRNA-1 | Indica | NA       |               |              | OsR498G0714514000.01.T02 | DCD domain-containing protein (Fragment)                                  |
| maker-7-augustus-gene-209.0-mRNA-1  | Indica | NA       | Kinase-TM     | Os07g0541400 | OsR498G0714516900.01.T02 | Cysteine-rich receptor kinase                                             |
| maker-7-augustus-gene-209.11-mRNA-1 | Indica | NA       | Kinase-TM     | Os07g0540800 | OsR498G0714515800.01.T01 | Receptor-like serine-threonine protein kinase                             |
| maker-7-augustus-gene-209.12-mRNA-1 | Indica | NA       | Kinase-TM     | Os07g0541000 | OsR498G0714516800.01.T01 | Cysteine-rich receptor-like protein kinase 10                             |
| maker-7-augustus-gene-209.21-mRNA-1 | Indica | Indica   | Kinase-TM     | Os07g0541500 | OsR498G0714517200.01.T02 | Cysteine-rich receptor kinase                                             |
| maker-7-augustus-gene-210.47-mRNA-1 | Indica | NA       | Kinase-TM     | Os07g0542400 | OsR498G0714519200.01.T05 | Putative Zea mays retrotransposon Opie-2                                  |
| maker-7-augustus-gene-217.0-mRNA-1  | Indica | NA       |               |              | OsR498G0714556100.01.T03 | Eukaryotic translation initiation factor 4G                               |
| maker-7-augustus-gene-218.16-mRNA-1 | Indica | Indica   |               | Os07g0557200 | OsR498G0714563000.01.T01 | Equilibrative nucleotide transporter like                                 |
| maker-7-augustus-gene-218.17-mRNA-1 | Indica | NA       |               | Os07g0557400 | OsR498G0714563000.01.T01 | Equilibrative nucleoside transporter                                      |
| maker-7-augustus-gene-229.47-mRNA-1 | Indica | Indica   |               | Os07g0573300 | OsR498G0714613700.01.T01 | FYVE-type domain-containing protein (Fragment)                            |
| maker-7-augustus-gene-23.32-mRNA-1  | Indica | Japonica |               | Os07g0151901 | OsR498G0713527800.01.T01 |                                                                           |
| maker-7-augustus-gene-231.60-mRNA-1 | Indica | Indica   |               | Os07g0576500 | OsR498G0714622800.01.T01 | Indole-3-acetic acid amido synthetase                                     |
| maker-7-augustus-gene-241.2-mRNA-1  | Indica | NA       |               | Os07g0598000 | OsR498G0714699100.01.T01 | Dihydroflavonol-4-reductase                                               |
| maker-7-augustus-gene-241.6-mRNA-1  | Indica | NA       |               |              | OsR498G0714699300.01.T04 | 21S rRNA (GM2251-2'-O)-methyltransferase                                  |
| maker-7-augustus-gene-242.49-mRNA-1 | Indica | NA       |               | Os07g0598700 | OsR498G0714702000.01.T02 | Golgin subfamily A member 4 isoform X1                                    |
| maker-7-augustus-gene-243.39-mRNA-1 | Indica | NA       |               | Os07g0602200 | OsR498G0714712900.01.T04 | Histone deacetylase                                                       |

|                                     |        |          |           |              |                          |                                                                        |
|-------------------------------------|--------|----------|-----------|--------------|--------------------------|------------------------------------------------------------------------|
| maker-7-augustus-gene-26.3-mRNA-1   | Indica | NA       |           | Os07g0155600 | OsR498G0713546500.01.T02 | Ethylene insensitive                                                   |
| maker-7-augustus-gene-27.31-mRNA-1  | Indica | NA       |           | Os07g0158900 | OsR498G0713555000.01.T04 | FBD domain-containing protein                                          |
| maker-7-augustus-gene-27.35-mRNA-1  | Indica | NA       |           | Os07g0159500 | OsR498G0713558200.01.T02 | Putative arylformamidase                                               |
| maker-7-augustus-gene-28.39-mRNA-1  | Indica | NA       |           |              | OsR498G0713563700.01.T04 | F-box domain-containing protein                                        |
| maker-7-augustus-gene-28.41-mRNA-1  | Indica | NA       |           |              | OsR498G0713563700.01.T06 | FBD domain-containing protein                                          |
| maker-7-augustus-gene-28.45-mRNA-1  | Indica | Indica   | Kinase-TM | Os07g0159700 | OsR498G0713558800.01.T02 | Protein kinase domain-containing protein (Fragment)                    |
| maker-7-augustus-gene-28.49-mRNA-1  | Indica | NA       |           | Os07g0160400 | OsR498G0713563400.01.T01 | VOC domain-containing protein (Fragment)                               |
| maker-7-augustus-gene-33.76-mRNA-1  | Indica | NA       |           |              |                          | 2-oxoisovalerate dehydrogenase subunit beta                            |
| maker-7-augustus-gene-33.86-mRNA-1  | Indica | Indica   |           | Os07g0171200 | OsR498G0713599800.01.T01 | ADP-glucose phosphorylase                                              |
| maker-7-augustus-gene-34.53-mRNA-1  | Indica | NA       |           |              | OsR498G0713603300.01.T01 |                                                                        |
| maker-7-augustus-gene-34.54-mRNA-1  | Indica | NA       |           | Os07g0172900 | OsR498G0713603500.01.T05 | Folate-biopterin transporter 1 chloroplastic                           |
| maker-7-augustus-gene-34.65-mRNA-1  | Indica | NA       |           |              | OsR498G0713605500.01.T05 | Acyl-CoA N-acyltransferase with RING/FYVE/PHD-type zinc finger protein |
| maker-7-augustus-gene-34.70-mRNA-1  | Indica | NA       |           | Os07g0173700 | OsR498G0713605700.01.T01 | 40S ribosomal protein S18 isoform B                                    |
| maker-7-augustus-gene-34.73-mRNA-1  | Indica | Indica   |           | Os07g0174400 | OsR498G0713606300.01.T01 | AAI domain-containing protein (Fragment)                               |
| maker-7-augustus-gene-34.75-mRNA-1  | Indica | NA       |           | Os07g0172500 | OsR498G0713602200.01.T01 | DNA-directed RNA polymerases II IV and V subunit 11                    |
| maker-7-augustus-gene-34.79-mRNA-1  | Indica | Indica   |           | Os07g0173200 | OsR498G0713604200.01.T03 | 5-methyltetrahydropteroylglutamate--homocysteine S-methyltransferase   |
| maker-7-augustus-gene-35.44-mRNA-1  | Indica | Japonica |           | Os07g0175000 | OsR498G0713608300.01.T01 | AAI domain-containing protein                                          |
| maker-7-augustus-gene-35.46-mRNA-1  | Indica | NA       |           | Os07g0175400 | OsR498G0713610100.01.T01 | Inwardly rectifying potassium channel subunit                          |
| maker-7-augustus-gene-35.49-mRNA-1  | Indica | NA       |           | Os07g0175500 | OsR498G0713610300.01.T01 | AAI domain-containing protein (Fragment)                               |
| maker-7-augustus-gene-35.51-mRNA-1  | Indica | NA       |           | Os07g0175600 | OsR498G0713610900.01.T01 | non-specific lipid-transfer protein-like protein At2g13820             |
| maker-7-augustus-gene-35.58-mRNA-1  | Indica | NA       |           | Os07g0174900 | OsR498G0713608000.01.T01 | AAI domain-containing protein                                          |
| maker-7-augustus-gene-35.60-mRNA-1  | Indica | NA       |           | Os07g0175100 |                          | protein ANTAGONIST OF LIKE HETEROCHROMATIN PROTEIN 1                   |
| maker-7-augustus-gene-35.62-mRNA-1  | Indica | Indica   |           | Os07g0175300 | OsR498G0713609400.01.T01 | FLZ-type domain-containing protein (Fragment)                          |
| maker-7-augustus-gene-38.0-mRNA-1   | Indica | Indica   |           | Os11g0135900 | OsR498G0713631300.01.T04 | MFS domain-containing protein                                          |
| maker-7-augustus-gene-40.44-mRNA-1  | Indica | NA       |           |              | OsR498G0713637100.01.T03 | DNA (cytosine-5)-methyltransferase                                     |
| maker-7-augustus-gene-41.14-mRNA-1  | Indica | NA       |           | Os07g0186000 | OsR498G0713649800.01.T01 | Thioredoxin H-type like                                                |
| maker-7-augustus-gene-9.19-mRNA-1   | Indica | Indica   |           | Os03g0770800 | OsR498G0713440600.01.T01 | Probable xyloglucan glycosyltransferase 1                              |
| maker-7-augustus-gene-9.22-mRNA-1   | Indica | NA       |           | Os07g0124800 | OsR498G0713441000.01.T02 | J domain-containing protein (Fragment)                                 |
| maker-7-augustus-gene-9.5-mRNA-1    | Indica | Indica   |           | Os07g0124700 | OsR498G0713440300.01.T02 | AP2/ERF domain-containing transcription factor                         |
| maker-8-augustus-gene-100.32-mRNA-1 | Indica | NA       |           | Os08g0260600 | OsR498G0815571400.01.T01 | Tetraspanin-8                                                          |
| maker-8-augustus-gene-102.41-mRNA-1 | Indica | NA       |           |              | OsR498G0408029600.01.T01 | Transposon protein, putative, CACTA, En/Spm sub-class                  |
| maker-8-augustus-gene-103.0-mRNA-1  | Indica | NA       |           |              | OsR498G0815582300.01.T01 | Lactation elevated protein 1                                           |
| maker-8-augustus-gene-103.14-mRNA-1 | Indica | NA       |           | Os08g0266700 | OsR498G0815585700.01.T01 | Sister chromatid cohesion 1 protein 3                                  |
| maker-8-augustus-gene-104.0-mRNA-1  | Indica | NA       |           |              |                          | F-box domain-containing protein                                        |
| maker-8-augustus-gene-104.10-mRNA-1 | Indica | NA       |           | Os08g0267800 | OsR498G0815589400.01.T01 | F-box domain-containing protein                                        |
| maker-8-augustus-gene-104.2-mRNA-1  | Indica | NA       |           |              | OsR498G0815591300.01.T02 | DNA-directed RNA polymerase III subunit RPC5                           |
| maker-8-augustus-gene-104.6-mRNA-1  | Indica | NA       |           | Os08g0267300 |                          | Peptidase A1 domain-containing protein (Fragment)                      |
| maker-8-augustus-gene-104.8-mRNA-1  | Indica | Indica   |           | Os08g0267800 | OsR498G0815588800.01.T01 | F-box domain-containing protein                                        |
| maker-8-augustus-gene-105.29-mRNA-1 | Indica | NA       |           | Os08g0270200 | OsR498G0815595900.01.T01 | Nuclear nucleic acid-binding protein C1D                               |
| maker-8-augustus-gene-105.33-mRNA-1 | Indica | Indica   |           | Os08g0269600 | OsR498G0815593400.01.T01 |                                                                        |
| maker-8-augustus-gene-105.35-mRNA-1 | Indica | NA       |           | Os08g0269700 | OsR498G0815593600.01.T01 |                                                                        |
| maker-8-augustus-gene-105.37-mRNA-1 | Indica | Indica   |           | Os08g0269800 | OsR498G0815593800.01.T02 | F-box protein SKIP1                                                    |
| maker-8-augustus-gene-106.31-mRNA-1 | Indica | Indica   |           | Os08g0270466 | OsR498G0815597600.01.T01 | Cinnamyl-alcohol dehydrogenase                                         |
| maker-8-augustus-gene-110.33-mRNA-1 | Indica | NA       |           | Os08g0277200 | OsR498G0815620900.01.T01 | Epimerase domain-containing protein (Fragment)                         |
| maker-8-augustus-gene-110.35-mRNA-1 | Indica | Indica   |           | Os08g0240000 | OsR498G0815621600.01.T01 | Sulfotransferase                                                       |
| maker-8-augustus-gene-113.32-mRNA-1 | Indica | NA       |           |              | OsR498G0815633900.01.T03 | Formin-like protein 6                                                  |
| maker-8-augustus-gene-114.0-mRNA-1  | Indica | Indica   |           | Os02g0116300 | OsR498G0815634100.01.T01 | Probable metal-nicotianamine transporter YSL17                         |
| maker-8-augustus-gene-115.41-mRNA-1 | Indica | NA       |           | Os08g0282000 | OsR498G0815638800.01.T01 | Tobamovirus multiplication protein like                                |
| maker-8-augustus-gene-119.0-mRNA-1  | Indica | NA       |           | Os08g0288200 | OsR498G0815658200.01.T02 | Adenylate kinase                                                       |
| maker-8-augustus-gene-124.27-mRNA-1 | Indica | NA       |           |              |                          | ubiquitin-like domain-containing protein CIP73 isoform X1              |
| maker-8-augustus-gene-125.24-mRNA-1 | Indica | NA       |           | Os08g0307400 | OsR498G0815726600.01.T05 | Phosphatidylinositol 3-kinase                                          |
| maker-8-augustus-gene-125.31-mRNA-1 | Indica | NA       |           | Os08g0295300 | OsR498G0815686000.01.T01 | Threonyl-tRNA synthetase                                               |
| maker-8-augustus-gene-125.37-mRNA-1 | Indica | NA       |           | Os08g0307500 |                          | PHD finger protein ING                                                 |
| maker-8-augustus-gene-126.0-mRNA-1  | Indica | NA       |           | Os08g0307000 | OsR498G0815725100.01.T05 | AAA domain-containing protein                                          |
| maker-8-augustus-gene-128.32-mRNA-1 | Indica | NA       |           |              | OsR498G0100616300.01.T02 | ATP-dependent DNA helicase                                             |
| maker-8-augustus-gene-129.47-mRNA-1 | Indica | NA       |           |              | OsR498G0815694100.01.T01 | Fatty acyl-CoA reductase                                               |
| maker-8-augustus-gene-13.37-mRNA-1  | Indica | NA       |           | Os08g0121800 | OsR498G0815093500.01.T01 |                                                                        |
| maker-8-augustus-gene-149.39-mRNA-1 | Indica | NA       |           | Os08g0327400 | OsR498G0815789900.01.T05 | Enoyl-ACP reductase                                                    |
| maker-8-augustus-gene-149.44-mRNA-1 | Indica | NA       |           | Os08g0327200 | OsR498G0815788600.01.T01 | Exopolysaccharuronase                                                  |
| maker-8-augustus-gene-152.35-mRNA-1 | Indica | Indica   |           | Os09g0281900 | OsR498G0815804700.01.T04 | Mediator of RNA polymerase II transcription subunit 14                 |
| maker-8-augustus-gene-153.0-mRNA-1  | Indica | NA       |           |              | OsR498G0815813000.01.T01 | Pre-mRNA-splicing factor ATP-dependent RNA helicase DEAH1              |

|                                     |        |        |                   |              |                          |                                                                               |
|-------------------------------------|--------|--------|-------------------|--------------|--------------------------|-------------------------------------------------------------------------------|
| maker-8-augustus-gene-156.31-mRNA-1 | Indica | NA     |                   |              |                          | general transcription and DNA repair factor IIH subunit TFB1-1-like isoform X |
| maker-8-augustus-gene-159.13-mRNA-1 | Indica | Indica |                   | Os08g0344300 | OsR498G0815843700.01.T03 | Mitochondrial pyruvate carrier                                                |
| maker-8-augustus-gene-159.16-mRNA-1 | Indica | NA     |                   | Os08g0344600 | OsR498G0815845300.01.T01 | Phosphoenolpyruvate/phosphate translocator like                               |
| maker-8-augustus-gene-160.28-mRNA-1 | Indica | Indica |                   | Os08g0345400 | OsR498G0815848100.01.T02 | Rho GTPase-activating protein 21-A (Fragment)                                 |
| maker-8-augustus-gene-160.39-mRNA-1 | Indica | Indica |                   | Os08g0345800 | OsR498G0815850400.01.T01 | Glucose-1-phosphate adenylyltransferase small subunit, chloroplastic/amylo    |
| maker-8-augustus-gene-161.4-mRNA-1  | Indica | NA     |                   |              | OsR498G0511410300.01.T03 | Solanesyl diphosphate synthase 2 chloroplastic                                |
| maker-8-augustus-gene-167.31-mRNA-1 | Indica | NA     |                   | Os08g0349100 | OsR498G0815862900.01.T01 | Dirigent protein (Fragment)                                                   |
| maker-8-augustus-gene-168.20-mRNA-1 | Indica | NA     |                   | Os08g0349100 | OsR498G0815862900.01.T01 | Dirigent protein (Fragment)                                                   |
| maker-8-augustus-gene-17.36-mRNA-1  | Indica | NA     |                   | Os08g0129500 | OsR498G0815110600.01.T01 | Electron carrier/ iron ion binding protein                                    |
| maker-8-augustus-gene-17.39-mRNA-1  | Indica | NA     |                   | Os08g0129600 | OsR498G0815110800.01.T02 | Protein CHUP1, chloroplastic isoform A                                        |
| maker-8-augustus-gene-180.24-mRNA-1 | Indica | NA     |                   | Os08g0363000 | OsR498G0815846800.01.T01 | F-box domain containing protein, expressed                                    |
| maker-8-augustus-gene-189.23-mRNA-1 | Indica | NA     |                   | Os08g0374100 | OsR498G0815943800.01.T01 | UBC core domain-containing protein (Fragment)                                 |
| maker-8-augustus-gene-189.26-mRNA-1 | Indica | Indica |                   | Os08g0374200 | OsR498G0815944200.01.T01 | UBC core domain-containing protein                                            |
| maker-8-augustus-gene-19.9-mRNA-1   | Indica | NA     |                   | Os08g0133000 | OsR498G0815124300.01.T02 | Cysteine dioxygenase                                                          |
| maker-8-augustus-gene-190.0-mRNA-1  | Indica | Indica | Kinase-TM         | Os08g0374600 | OsR498G0815946800.01.T03 | Cytokinin-regulated kinase-like                                               |
| maker-8-augustus-gene-190.2-mRNA-1  | Indica | NA     |                   | Os08g0374800 | OsR498G0815947600.01.T01 | UDP-glucose 4-epimerase 4                                                     |
| maker-8-augustus-gene-191.10-mRNA-1 | Indica | NA     | Kinase-LRR-TM     | Os08g0376300 | OsR498G0815955000.01.T01 | Receptor-like protein kinase 5                                                |
| maker-8-augustus-gene-192.33-mRNA-1 | Indica | NA     |                   | Os08g0377400 | OsR498G0815960600.01.T05 | RNA exonuclease 4                                                             |
| maker-8-augustus-gene-192.35-mRNA-1 | Indica | NA     |                   | Os08g0378900 | OsR498G0815961200.01.T02 | Thioredoxin-like protein CITRX, chloroplastic                                 |
| maker-8-augustus-gene-193.36-mRNA-1 | Indica | NA     |                   | Os08g0379300 | OsR498G0815961900.01.T06 | Phosphoglucan phosphatase LSF                                                 |
| maker-8-augustus-gene-193.41-mRNA-1 | Indica | NA     |                   | Os08g0380100 | OsR498G0815964500.01.T03 | BURP domain-containing protein 12                                             |
| maker-8-augustus-gene-193.43-mRNA-1 | Indica | NA     |                   | Os08g0379400 | OsR498G0815962200.01.T01 | 2-methylene-furan-3-one reductase                                             |
| maker-8-augustus-gene-194.8-mRNA-1  | Indica | NA     |                   |              |                          |                                                                               |
| maker-8-augustus-gene-195.13-mRNA-1 | Indica | NA     |                   | Os08g0384100 | OsR498G0815974800.01.T01 | double-stranded RNA-binding protein 3-like                                    |
| maker-8-augustus-gene-195.17-mRNA-1 | Indica | Indica |                   | Os08g0384500 | OsR498G0815975800.01.T02 | ABC transporter domain-containing protein                                     |
| maker-8-augustus-gene-195.4-mRNA-1  | Indica | Indica |                   | Os08g0384000 | OsR498G0815974500.01.T01 | probable transmembrane ascorbate ferrioreductase 2                            |
| maker-8-augustus-gene-20.35-mRNA-1  | Indica | NA     |                   |              |                          | Skp1 domain-containing protein                                                |
| maker-8-augustus-gene-20.38-mRNA-1  | Indica | NA     |                   |              | OsR498G0307051300.01.T01 | Cysteine dioxygenase                                                          |
| maker-8-augustus-gene-203.30-mRNA-1 | Indica | NA     |                   | Os08g0397900 | OsR498G0816026100.01.T01 | Putative S-acyltransferase                                                    |
| maker-8-augustus-gene-203.33-mRNA-1 | Indica | NA     |                   | Os08g0398300 | OsR498G0816026500.01.T01 | ABC transporter A family member 6                                             |
| maker-8-augustus-gene-203.36-mRNA-1 | Indica | Indica |                   | Os08g0398350 | OsR498G0816026900.01.T01 | ABC transporter domain-containing protein (Fragment)                          |
| maker-8-augustus-gene-203.41-mRNA-1 | Indica | NA     |                   | Os08g0398400 | OsR498G0816027300.01.T06 | Hypersensitive-induced response protein 1                                     |
| maker-8-augustus-gene-203.45-mRNA-1 | Indica | NA     |                   | Os08g0398700 | OsR498G0816027700.01.T01 | Aminopeptidase                                                                |
| maker-8-augustus-gene-203.51-mRNA-1 | Indica | NA     |                   | Os08g0398000 | OsR498G0816026400.01.T01 | ABC transporter domain-containing protein (Fragment)                          |
| maker-8-augustus-gene-203.55-mRNA-1 | Indica | NA     |                   | Os08g0398500 | OsR498G0816027600.01.T01 | H/ACA ribonucleoprotein complex subunit CBF5                                  |
| maker-8-augustus-gene-204.2-mRNA-1  | Indica | NA     |                   | Os08g0400300 | OsR498G0816031900.01.T04 | DnaJ subfamily C member 2, N-terminally processed like                        |
| maker-8-augustus-gene-204.6-mRNA-1  | Indica | Indica |                   | Os08g0400800 | OsR498G0816032500.01.T02 | F-box domain containing protein, expressed                                    |
| maker-8-augustus-gene-204.9-mRNA-1  | Indica | NA     |                   | Os08g0401100 | OsR498G0816033100.01.T01 | PGG domain-containing protein                                                 |
| maker-8-augustus-gene-205.4-mRNA-1  | Indica | NA     |                   | Os08g0401500 | OsR498G0816035400.01.T02 |                                                                               |
| maker-8-augustus-gene-205.7-mRNA-1  | Indica | NA     |                   | Os08g0401800 | OsR498G0816036000.01.T01 | Phospholipase D                                                               |
| maker-8-augustus-gene-21.38-mRNA-1  | Indica | NA     |                   | Os08g0135400 | OsR498G0815132500.01.T01 | E3 ubiquitin-protein like                                                     |
| maker-8-augustus-gene-21.42-mRNA-1  | Indica | NA     |                   | Os08g0135800 | OsR498G0815133100.01.T02 | Zinc finger CCH domain-containing protein 55                                  |
| maker-8-augustus-gene-21.44-mRNA-1  | Indica | NA     |                   | Os08g0135900 | OsR498G0815133300.01.T01 | Tryptophan synthase beta chain 2, chloroplastic                               |
| maker-8-augustus-gene-21.56-mRNA-1  | Indica | NA     |                   |              | OsR498G0815133000.01.T01 | Mediator of RNA polymerase II transcription subunit 21                        |
| maker-8-augustus-gene-21.58-mRNA-1  | Indica | Indica |                   | Os04g0627000 | OsR498G0815133600.01.T01 | Homeobox-leucine zipper protein ROC7                                          |
| maker-8-augustus-gene-210.50-mRNA-1 | Indica | NA     | CC-LRR-NBS-TM     |              | OsR498G0816075400.01.T01 | Disease resistance protein RPM1                                               |
| maker-8-augustus-gene-210.59-mRNA-1 | Indica | NA     |                   | Os08g0412500 | OsR498G0816077400.01.T03 | Mitochondrial pyruvate carrier                                                |
| maker-8-augustus-gene-210.62-mRNA-1 | Indica | NA     |                   |              | OsR498G0816077600.01.T01 | Ecotropic viral integration site 5 protein isogeny                            |
| maker-8-augustus-gene-211.53-mRNA-1 | Indica | NA     |                   | Os08g0414200 | OsR498G0816080700.01.T01 | RING-type E3 ubiquitin transferase BRCA1                                      |
| maker-8-augustus-gene-211.55-mRNA-1 | Indica | NA     |                   | Os08g0414300 | OsR498G0816080900.01.T01 | Cyclic AMP-responsive element-binding protein like                            |
| maker-8-augustus-gene-211.59-mRNA-1 | Indica | NA     |                   | Os08g0413000 | OsR498G0816078200.01.T01 | Cell division control protein 48                                              |
| maker-8-augustus-gene-212.49-mRNA-1 | Indica | NA     |                   | Os08g0414700 | OsR498G0816083200.01.T01 | Trehalose-phosphatase/synthase 9                                              |
| maker-8-augustus-gene-212.56-mRNA-1 | Indica | NA     |                   | Os08g0416100 | OsR498G0816086800.01.T01 | DEAD-box ATP-dependent RNA helicase 29                                        |
| maker-8-augustus-gene-215.49-mRNA-1 | Indica | NA     |                   |              | OsR498G0816099200.01.T01 | Cyclin N-terminal domain-containing protein                                   |
| maker-8-augustus-gene-215.52-mRNA-1 | Indica | NA     | CC-Kinase-TM Pi33 | Os08g0421800 | OsR498G0816100400.01.T01 | Pyricularia oryzae resistance-33(t) Pi33 R gene                               |
| maker-8-augustus-gene-222.21-mRNA-1 | Indica | NA     |                   | Os08g0432500 | OsR498G0816144000.01.T01 | ATP-dependent Clp protease adaptor protein ClpS containing protein            |
| maker-8-augustus-gene-222.25-mRNA-1 | Indica | NA     |                   | Os08g0432800 | OsR498G0816145600.01.T01 | Transcription factor bHLH30 like                                              |
| maker-8-augustus-gene-223.39-mRNA-1 | Indica | NA     |                   | Os08g0433200 | OsR498G0816148700.01.T03 | Cytosolic fe-s cluster assembly factor nar1                                   |
| maker-8-augustus-gene-223.41-mRNA-1 | Indica | NA     |                   | Os08g0434000 | OsR498G0816150900.01.T05 | Selenium-binding protein-like                                                 |
| maker-8-augustus-gene-223.42-mRNA-1 | Indica | NA     |                   | Os08g0434100 | OsR498G0816151100.01.T01 | Wounding-induced ribonuclease                                                 |
| maker-8-augustus-gene-223.50-mRNA-1 | Indica | NA     |                   | Os08g0433400 | OsR498G0816149200.01.T05 | MIXTA1 transcription factor                                                   |

|                                     |        |          |               |              |                          |                                                                                   |
|-------------------------------------|--------|----------|---------------|--------------|--------------------------|-----------------------------------------------------------------------------------|
| maker-8-augustus-gene-224.0-mRNA-1  | Indica | NA       |               |              | OsR498G0816153900.01.T02 | Putative mannan synthase 7                                                        |
| maker-8-augustus-gene-224.5-mRNA-1  | Indica | NA       |               |              |                          | Myb-related protein 2                                                             |
| maker-8-augustus-gene-225.31-mRNA-1 | Indica | Japonica |               | Os08g0435700 | OsR498G0816157500.01.T01 | Transcription factor MYB105                                                       |
| maker-8-augustus-gene-225.34-mRNA-1 | Indica | NA       |               | Os08g0436100 | OsR498G0816159500.01.T04 | Apyrase 6                                                                         |
| maker-8-augustus-gene-225.45-mRNA-1 | Indica | NA       |               | Os08g0435800 | OsR498G0816158800.01.T02 | Biotinyl protein ligase (BPL) and lipoyl protein ligase (LPL), catalytic domain c |
| maker-8-augustus-gene-225.48-mRNA-1 | Indica | NA       |               | Os08g0435900 | OsR498G0816159000.01.T01 | Chlorophyll a-b binding protein, chloroplastic                                    |
| maker-8-augustus-gene-225.51-mRNA-1 | Indica | NA       |               | Os08g0436000 | OsR498G0816159200.01.T01 | Polypyrimidine tract-binding protein isogeny 1                                    |
| maker-8-augustus-gene-226.24-mRNA-1 | Indica | NA       |               | Os08g0438600 | OsR498G0816166700.01.T02 | Exostosin domain-containing protein (Fragment)                                    |
| maker-8-augustus-gene-227.12-mRNA-1 | Indica | NA       |               |              |                          | Temperature-induced lipocalin-2                                                   |
| maker-8-augustus-gene-227.14-mRNA-1 | Indica | NA       |               |              |                          | Poly(A)-specific ribonuclease PARN-like                                           |
| maker-8-augustus-gene-227.20-mRNA-1 | Indica | NA       |               | Os08g0440000 | OsR498G0816170600.01.T03 | Golgi SNAP receptor complex member 1                                              |
| maker-8-augustus-gene-228.34-mRNA-1 | Indica | NA       |               | Os08g0440800 | OsR498G0816174900.01.T01 | Aldedh domain-containing protein                                                  |
| maker-8-augustus-gene-228.42-mRNA-1 | Indica | NA       |               |              |                          | Glycosyltransferase 39 like protein (Fragment)                                    |
| maker-8-augustus-gene-228.46-mRNA-1 | Indica | NA       |               |              | OsR498G0816175400.01.T01 | Omega-6 fatty acid desaturase chloroplastic                                       |
| maker-8-augustus-gene-230.0-mRNA-1  | Indica | NA       |               | Os08g0445700 | OsR498G0816196900.01.T01 | Trehalose-phosphatase                                                             |
| maker-8-augustus-gene-231.37-mRNA-1 | Indica | NA       | Kinase-LRR-TM |              | OsR498G0816198400.01.T04 | Receptor-like protein kinase                                                      |
| maker-8-augustus-gene-231.39-mRNA-1 | Indica | Indica   |               | Os06g0655100 | OsR498G0816202800.01.T01 | D-3-phosphoglycerate dehydrogenase                                                |
| maker-8-augustus-gene-231.42-mRNA-1 | Indica | NA       |               | Os08g0447200 | OsR498G0816204200.01.T01 | Protein ecdysoneless like                                                         |
| maker-8-augustus-gene-232.51-mRNA-1 | Indica | NA       |               | Os08g0447900 | OsR498G0816205500.01.T02 | Adenylyl cyclase-associated protein                                               |
| maker-8-augustus-gene-232.53-mRNA-1 | Indica | Japonica |               | Os08g0447300 | OsR498G0816204600.01.T04 | DUF676 domain-containing protein                                                  |
| maker-8-augustus-gene-232.60-mRNA-1 | Indica | NA       |               |              | OsR498G0816205000.01.T02 | Dentin sialophosphoprotein-related                                                |
| maker-8-augustus-gene-232.62-mRNA-1 | Indica | NA       |               | Os08g0448000 | OsR498G0816205800.01.T02 | 4-coumarate--CoA ligase                                                           |
| maker-8-augustus-gene-253.23-mRNA-1 | Indica | NA       |               |              |                          |                                                                                   |
| maker-8-augustus-gene-260.0-mRNA-1  | Indica | Indica   | LRR-TM        | Os08g0499900 | OsR498G0816398100.01.T01 | F-box protein At-B                                                                |
| maker-8-augustus-gene-260.26-mRNA-1 | Indica | NA       |               | Os08g0500300 | OsR498G0816399200.01.T02 | PPM-type phosphatase domain-containing protein (Fragment)                         |
| maker-8-augustus-gene-275.32-mRNA-1 | Indica | NA       |               | Os08g0526500 | OsR498G0816500100.01.T02 | Ankyrin repeat and SAM domain-containing protein 6                                |
| maker-8-augustus-gene-275.35-mRNA-1 | Indica | NA       |               |              |                          | UBA domain-containing protein (Fragment)                                          |
| maker-8-augustus-gene-275.39-mRNA-1 | Indica | NA       |               |              | OsR498G0816499400.01.T01 | E3 ubiquitin ligase RNF4                                                          |
| maker-8-augustus-gene-275.42-mRNA-1 | Indica | Indica   |               | Os08g0526400 | OsR498G0816499600.01.T02 | RPM1-interacting protein 4 isoform B                                              |
| maker-8-augustus-gene-275.44-mRNA-1 | Indica | NA       |               | Os08g0527100 | OsR498G0816502800.01.T01 | Ubiquitinyl hydrolase 1                                                           |
| maker-8-augustus-gene-275.52-mRNA-1 | Indica | NA       |               |              |                          | Ubiquitinyl hydrolase 1                                                           |
| maker-8-augustus-gene-276.0-mRNA-1  | Indica | NA       |               | Os08g0528900 | OsR498G0816508900.01.T02 | FHA domain-containing protein FHA2                                                |
| maker-8-augustus-gene-276.19-mRNA-1 | Indica | NA       |               | Os08g0528100 |                          | Ubiquitinyl hydrolase 1                                                           |
| maker-8-augustus-gene-276.2-mRNA-1  | Indica | NA       |               | Os08g0529100 | OsR498G0816510300.01.T01 | Proteasome endopeptidase complex                                                  |
| maker-8-augustus-gene-276.22-mRNA-1 | Indica | NA       |               | Os08g0528500 | OsR498G0816507800.01.T02 | Probable magnesium transporter                                                    |
| maker-8-augustus-gene-276.26-mRNA-1 | Indica | NA       |               | Os08g0528601 | OsR498G0816508200.01.T02 | GRIP/coiled-coil protein                                                          |
| maker-8-augustus-gene-276.29-mRNA-1 | Indica | NA       |               |              | OsR498G0816508400.01.T01 | Mitochondrial transcription termination factor-like family-4                      |
| maker-8-augustus-gene-276.30-mRNA-1 | Indica | NA       |               | Os08g0528800 | OsR498G0816508600.01.T01 | Peptidase S1, PA clan                                                             |
| maker-8-augustus-gene-276.32-mRNA-1 | Indica | NA       |               | Os08g0529000 | OsR498G0816509400.01.T01 | Auxin efflux carrier component                                                    |
| maker-8-augustus-gene-276.5-mRNA-1  | Indica | NA       |               | Os04g0691400 | OsR498G0409539100.01.T01 | Peptide transporter PTR1                                                          |
| maker-8-augustus-gene-277.37-mRNA-1 | Indica | Indica   |               | Os07g0294800 | OsR498G0816513900.01.T01 | Regulatory protein-like                                                           |
| maker-8-augustus-gene-277.39-mRNA-1 | Indica | NA       |               | Os08g0530400 | OsR498G0816515900.01.T01 | Sulfite oxidase                                                                   |
| maker-8-augustus-gene-277.46-mRNA-1 | Indica | NA       |               | Os08g0531000 | OsR498G0816517100.01.T02 | Purple acid phosphatase                                                           |
| maker-8-augustus-gene-277.54-mRNA-1 | Indica | NA       |               | Os08g0531100 | OsR498G0816517500.01.T06 | 65-kDa microtubule-associated protein 8                                           |
| maker-8-augustus-gene-277.60-mRNA-1 | Indica | NA       |               | Os08g0529800 | OsR498G0816512800.01.T01 | Triacylglycerol lipase 2                                                          |
| maker-8-augustus-gene-277.63-mRNA-1 | Indica | NA       |               | Os08g0530200 | OsR498G0816514600.01.T01 | Ribosomal protein L17c                                                            |
| maker-8-augustus-gene-277.67-mRNA-1 | Indica | NA       |               | Os08g0530500 | OsR498G0816516200.01.T01 | COMM domain-containing protein 9                                                  |
| maker-8-augustus-gene-277.69-mRNA-1 | Indica | NA       |               |              |                          | Auxin response factor 12                                                          |
| maker-8-augustus-gene-278.0-mRNA-1  | Indica | NA       |               | Os08g0531300 | OsR498G0816518100.01.T01 | YrdC-like domain-containing protein (Fragment)                                    |
| maker-8-augustus-gene-30.34-mRNA-1  | Indica | NA       |               | Os08g0148500 | OsR498G0815189100.01.T01 |                                                                                   |
| maker-8-augustus-gene-30.65-mRNA-1  | Indica | NA       |               |              |                          | F-box domain-containing protein (Fragment)                                        |
| maker-8-augustus-gene-31.29-mRNA-1  | Indica | NA       |               | Os08g0150700 | OsR498G0815197100.01.T01 | Phloem-specific lectin                                                            |
| maker-8-augustus-gene-31.39-mRNA-1  | Indica | NA       |               |              | OsR498G0815198500.01.T03 | CCA-type MYB transcription factor 1h (Fragment)                                   |
| maker-8-augustus-gene-31.62-mRNA-1  | Indica | NA       |               |              | OsR498G0815196000.01.T02 | FBD domain-containing protein                                                     |
| maker-8-augustus-gene-31.65-mRNA-1  | Indica | NA       |               | Os08g0151300 | OsR498G0815199200.01.T01 | Transcription factor MYB26                                                        |
| maker-8-augustus-gene-32.36-mRNA-1  | Indica | NA       |               |              | OsR498G0815202500.01.T01 | Aquaporin NIP3-3                                                                  |
| maker-8-augustus-gene-32.38-mRNA-1  | Indica | NA       |               | Os08g0152700 | OsR498G0815204100.01.T01 | Sphingoid long-chain bases kinase 1                                               |
| maker-8-augustus-gene-32.42-mRNA-1  | Indica | NA       |               |              | OsR498G0815205300.01.T01 | Sulfonylurea receptor, P-loop containing nucleoside triphosphate hydrolase        |
| maker-8-augustus-gene-32.45-mRNA-1  | Indica | NA       |               |              |                          | Multidrug/pheromone exporter, MDR family, ABC transporter family                  |
| maker-8-augustus-gene-32.46-mRNA-1  | Indica | NA       |               | Os08g0152500 | OsR498G0815203600.01.T04 | Protein ENHANCED DISEASE RESISTANCE 2-like                                        |
| maker-8-augustus-gene-32.50-mRNA-1  | Indica | Indica   |               | Os02g0106800 | OsR498G0815204400.01.T02 | Transmembrane protein 120                                                         |



|                                     |        |          |                  |              |                          |                                                          |
|-------------------------------------|--------|----------|------------------|--------------|--------------------------|----------------------------------------------------------|
| maker-8-augustus-gene-32.54-mRNA-1  | Indica | NA       |                  |              | OsR498G0815205000.01.T01 | HEAT repeat-containing protein 6                         |
| maker-8-augustus-gene-33.40-mRNA-1  | Indica | NA       |                  | Os08g0154000 | OsR498G0815208700.01.T02 | Tricin synthase 1                                        |
| maker-8-augustus-gene-33.44-mRNA-1  | Indica | NA       |                  | Os08g0154600 |                          | DNA topoisomerase I                                      |
| maker-8-augustus-gene-33.46-mRNA-1  | Indica | Indica   |                  | Os08g0154700 | OsR498G0815210500.01.T01 | Sm domain-containing protein (Fragment)                  |
| maker-8-augustus-gene-33.61-mRNA-1  | Indica | Indica   |                  | Os08g0159900 | OsR498G0815209400.01.T01 | DEAD-box ATP-dependent RNA helicase                      |
| maker-8-augustus-gene-33.64-mRNA-1  | Indica | Indica   |                  | Os08g0154250 | OsR498G0815209800.01.T01 | Monocopper oxidase                                       |
| maker-8-augustus-gene-33.66-mRNA-1  | Indica | NA       |                  | Os08g0154300 | OsR498G0815210200.01.T01 | Transaldolase                                            |
| maker-8-augustus-gene-35.30-mRNA-1  | Indica | NA       |                  | Os08g0156700 | OsR498G0815224800.01.T01 | MSP domain-containing protein (Fragment)                 |
| maker-8-augustus-gene-35.43-mRNA-1  | Indica | NA       |                  | Os08g0157500 | OsR498G0815228600.01.T01 | Caffeic acid-O-methyltransferase                         |
| maker-8-augustus-gene-36.34-mRNA-1  | Indica | Indica   |                  | Os08g0157600 | OsR498G0815231500.01.T07 | Circadian clock associated protein 1                     |
| maker-8-augustus-gene-36.39-mRNA-1  | Indica | NA       |                  | Os08g0158500 | OsR498G0815235900.01.T03 | PHB domain-containing protein (Fragment)                 |
| maker-8-augustus-gene-36.48-mRNA-1  | Indica | NA       |                  | Os08g0159100 | OsR498G0815236900.01.T04 | Tobamovirus multiplication protein 2A                    |
| maker-8-augustus-gene-36.51-mRNA-1  | Indica | NA       |                  | Os08g0157800 | OsR498G0815232800.01.T01 |                                                          |
| maker-8-augustus-gene-36.58-mRNA-1  | Indica | NA       |                  | Os08g0158900 | OsR498G0815236600.01.T02 | Nucleolar GTP-binding protein 1                          |
| maker-8-augustus-gene-37.19-mRNA-1  | Indica | NA       |                  | Os08g0159500 | OsR498G0815239000.01.T04 | LOL1 (LSD ONE LIKE 1)                                    |
| maker-8-augustus-gene-4.60-mRNA-1   | Indica | NA       |                  | Os08g0106900 |                          | DDE Tnp4 domain-containing protein                       |
| maker-8-augustus-gene-40.56-mRNA-1  | Indica | NA       |                  |              |                          | Deoxyribonuclease TATDN1                                 |
| maker-8-augustus-gene-40.61-mRNA-1  | Indica | Japonica |                  | Os08g0163900 | OsR498G0815262100.01.T01 | DUF569 domain-containing protein                         |
| maker-8-augustus-gene-41.0-mRNA-1   | Indica | NA       |                  | Os08g0166450 |                          | SWIM-type domain-containing protein                      |
| maker-8-augustus-gene-41.11-mRNA-1  | Indica | NA       |                  | Os08g0167400 | OsR498G0815269800.01.T01 | Pentatricopeptide (PPR) repeat-containing protein-like   |
| maker-8-augustus-gene-41.14-mRNA-1  | Indica | Japonica |                  | Os08g0167600 | OsR498G0815270400.01.T01 |                                                          |
| maker-8-augustus-gene-41.2-mRNA-1   | Indica | NA       |                  |              | OsR498G0815268500.01.T01 | ABC transporter domain-containing protein                |
| maker-8-augustus-gene-41.4-mRNA-1   | Indica | NA       |                  | Os08g0167500 | OsR498G0815270100.01.T02 | Chlororespiratory reduction 6                            |
| maker-8-augustus-gene-41.7-mRNA-1   | Indica | Japonica |                  | Os08g0168000 | OsR498G0815271100.01.T02 | Sesquiterpene synthase                                   |
| maker-8-augustus-gene-41.9-mRNA-1   | Indica | Japonica |                  | Os08g0168150 | OsR498G0917743600.01.T01 | EIN3-binding F-box protein 1                             |
| maker-8-augustus-gene-42.33-mRNA-1  | Indica | NA       |                  | Os08g0168700 | OsR498G0815272900.01.T02 | Glycosyltransferase                                      |
| maker-8-augustus-gene-52.14-mRNA-1  | Indica | NA       |                  | Os08g0187700 | OsR498G0815333200.01.T01 | Polyadenylation and cleavage factor homolog 5            |
| maker-8-augustus-gene-53.35-mRNA-1  | Indica | NA       |                  | Os08g0189200 | OsR498G0815337700.01.T01 | Germin-like protein 8-3                                  |
| maker-8-augustus-gene-53.49-mRNA-1  | Indica | Japonica |                  | Os08g0190700 | OsR498G0815344500.01.T02 | CAP-Gly domain-containing linker protein 1-like          |
| maker-8-augustus-gene-53.54-mRNA-1  | Indica | Japonica | CC-LRR-NBS-TM    | Os08g0190300 | OsR498G0815343400.01.T01 |                                                          |
| maker-8-augustus-gene-54.2-mRNA-1   | Indica | Indica   |                  | Os04g0624600 | OsR498G0815345700.01.T01 | Starch synthase IIIa                                     |
| maker-8-augustus-gene-54.6-mRNA-1   | Indica | NA       |                  | Os08g0191600 | OsR498G0815346100.01.T04 | Autophagy-related protein 8B                             |
| maker-8-augustus-gene-57.61-mRNA-1  | Indica | Indica   |                  | Os08g0197500 | OsR498G0815366900.01.T01 | F-box domain-containing protein (Fragment)               |
| maker-8-augustus-gene-60.12-mRNA-1  | Indica | NA       | NBS-TM           | Os08g0202400 | OsR498G0815386000.01.T02 | NB-ARC domain-containing protein                         |
| maker-8-augustus-gene-60.8-mRNA-1   | Indica | Indica   | CC-Kinase-LRR-TM | Os08g0201700 | OsR498G0815385700.01.T13 | Non-specific serine/threonine protein kinase             |
| maker-8-augustus-gene-85.14-mRNA-1  | Indica | Indica   |                  | Os08g0236900 | OsR498G0815500400.01.T02 |                                                          |
| maker-8-augustus-gene-87.11-mRNA-1  | Indica | NA       |                  |              |                          | Complex 1 family protein, putative, expressed            |
| maker-8-augustus-gene-87.21-mRNA-1  | Indica | NA       |                  |              |                          |                                                          |
| maker-8-augustus-gene-88.38-mRNA-1  | Indica | Indica   |                  | Os08g0239100 | OsR498G0815510300.01.T01 | Endo-1,31,4-beta-D-glucanase, putative, expressed        |
| maker-8-augustus-gene-91.5-mRNA-1   | Indica | Japonica |                  | Os08g0244500 | OsR498G0714509400.01.T03 | Glucan endo-1,3-beta-D-glucosidase                       |
| maker-8-augustus-gene-91.6-mRNA-1   | Indica | NA       |                  | Os08g0244500 | OsR498G0714509400.01.T01 | Glucan endo-1,3-beta-D-glucosidase                       |
| maker-8-augustus-gene-96.10-mRNA-1  | Indica | NA       |                  | Os08g0254600 | OsR498G0815559000.01.T01 | Cyclic nucleotide-gated ion channel 17                   |
| maker-8-augustus-gene-96.5-mRNA-1   | Indica | NA       |                  | Os08g0254500 | OsR498G0815558700.01.T05 | Preprotein translocase subunit SECY, chloroplastic       |
| maker-8-augustus-gene-97.0-mRNA-1   | Indica | NA       |                  | Os08g0254900 | OsR498G0815559700.01.T01 | Glutaryl-tRNA reductase-binding protein chloroplastic    |
| maker-9-augustus-gene-100.40-mRNA-1 | Indica | Japonica |                  | Os09g0330700 | OsR498G0917172500.01.T01 |                                                          |
| maker-9-augustus-gene-101.0-mRNA-1  | Indica | NA       |                  |              |                          | Protein disulfide-isomerase                              |
| maker-9-augustus-gene-102.26-mRNA-1 | Indica | NA       |                  | Os09g0331900 | OsR498G0917174600.01.T01 |                                                          |
| maker-9-augustus-gene-102.29-mRNA-1 | Indica | NA       |                  | Os09g0332360 |                          | ABC transporter domain-containing protein                |
| maker-9-augustus-gene-102.30-mRNA-1 | Indica | Indica   |                  | Os01g0609066 | OsR498G0917178000.01.T01 | Pleiotropic drug resistance protein 4                    |
| maker-9-augustus-gene-103.30-mRNA-1 | Indica | NA       |                  | Os09g0333600 | OsR498G0917179000.01.T01 | ABC transporter domain containing protein,expressed      |
| maker-9-augustus-gene-104.2-mRNA-1  | Indica | NA       |                  | Os09g0353700 | OsR498G0917230700.01.T01 | Iron/ascorbate-dependent oxidoreductase-like             |
| maker-9-augustus-gene-109.7-mRNA-1  | Indica | NA       |                  | Os09g0346600 | OsR498G0917207600.01.T03 | Short-chain dehydrogenase TIC 32, chloroplastic          |
| maker-9-augustus-gene-112.25-mRNA-1 | Indica | NA       |                  |              |                          | Glycerophosphodiester phosphodiesterase                  |
| maker-9-augustus-gene-113.29-mRNA-1 | Indica | NA       |                  | Os02g0545300 |                          | Putative ATP synthase subunit                            |
| maker-9-augustus-gene-115.2-mRNA-1  | Indica | NA       | Kinase-TM        |              |                          | Serine/threonine-specific receptor protein kinase-like   |
| maker-9-augustus-gene-117.3-mRNA-1  | Indica | Indica   | Kinase-TM        | Os09g0356800 | OsR498G0917240400.01.T05 | Protein kinase domain-containing protein                 |
| maker-9-augustus-gene-122.2-mRNA-1  | Indica | NA       |                  |              | OsR498G0917264000.01.T01 |                                                          |
| maker-9-augustus-gene-122.4-mRNA-1  | Indica | NA       |                  |              | OsR498G0917264600.01.T01 |                                                          |
| maker-9-augustus-gene-13.31-mRNA-1  | Indica | Indica   |                  | Os09g0115900 | OsR498G0916693700.01.T01 | DOG1 domain-containing protein                           |
| maker-9-augustus-gene-136.28-mRNA-1 | Indica | NA       |                  |              |                          | Pyruvate kinase                                          |
| maker-9-augustus-gene-139.0-mRNA-1  | Indica | NA       |                  | Os09g0395300 | OsR498G0917383500.01.T01 | Homeodomain-like superfamily protein, putative isoform 1 |

|                                         |          |          |            |              |                          |                                                          |
|-----------------------------------------|----------|----------|------------|--------------|--------------------------|----------------------------------------------------------|
| maker-9-augustus-gene-139.12-mRNA-1     | Indica   | Indica   |            | Os09g0395600 | OsR498G0917385200.01.T01 | Xyloglucan endotransglucosylase/hydrolase                |
| maker-9-augustus-gene-141.42-mRNA-1     | Indica   | Indica   |            | Os09g0400000 | OsR498G0917404400.01.T01 | Cinnamyl alcohol dehydrogenase 3                         |
| maker-9-augustus-gene-141.44-mRNA-1     | Indica   | NA       |            | Os09g0400400 | OsR498G0917405100.01.T01 | Cinnamyl alcohol dehydrogenase 3                         |
| maker-9-augustus-gene-141.46-mRNA-1     | Indica   | NA       |            | Os09g0401000 | OsR498G0917407900.01.T01 | MYB transcriptional factor                               |
| maker-9-augustus-gene-141.48-mRNA-1     | Indica   | NA       |            | Os09g0399800 | OsR498G0917404000.01.T01 | Cinnamyl alcohol dehydrogenase                           |
| maker-9-augustus-gene-141.50-mRNA-1     | Indica   | Indica   |            | Os09g0400000 | OsR498G0917404400.01.T01 | Cinnamyl alcohol dehydrogenase 3                         |
| maker-9-augustus-gene-142.33-mRNA-1     | Indica   | Indica   |            | Os09g0401100 | OsR498G0917409300.01.T01 | Half-size ABCG transporter                               |
| maker-9-augustus-gene-142.44-mRNA-1     | Indica   | NA       |            | Os09g0401200 | OsR498G0917409600.01.T06 | TPR repeat-containing thioredoxin TDX                    |
| maker-9-augustus-gene-142.49-mRNA-1     | Indica   | NA       |            |              |                          | DEAD/DEAH box helicase                                   |
| maker-9-augustus-gene-142.50-mRNA-1     | Indica   | NA       |            | Os09g0401300 | OsR498G0917410000.01.T01 | Tify domain-containing protein                           |
| maker-9-augustus-gene-144.42-mRNA-1     | Indica   | NA       |            |              | OsR498G0917420300.01.T01 |                                                          |
| maker-9-augustus-gene-144.54-mRNA-1     | Indica   | NA       |            | Os09g0406100 | OsR498G0917419000.01.T01 |                                                          |
| maker-9-augustus-gene-145.39-mRNA-1     | Indica   | NA       | Kinase-TM  | Os09g0408800 | OsR498G0917427900.01.T01 | Cysteine-rich receptor-like protein kinase 10            |
| maker-9-augustus-gene-15.2-mRNA-1       | Indica   | NA       |            | Os04g0274700 | OsR498G0613115000.01.T04 |                                                          |
| maker-9-augustus-gene-151.27-mRNA-1     | Indica   | NA       |            |              | OsR498G0917466700.01.T02 |                                                          |
| maker-9-augustus-gene-151.32-mRNA-1     | Indica   | NA       |            | Os09g0419200 | OsR498G0917467800.01.T01 | Cinnamoyl CoA reductase                                  |
| maker-9-augustus-gene-154.28-mRNA-1     | Indica   | NA       |            |              |                          | FAR1 domain-containing protein                           |
| maker-9-augustus-gene-154.43-mRNA-1     | Indica   | NA       |            |              | OsR498G0407890700.01.T01 |                                                          |
| maker-9-augustus-gene-25.35-mRNA-1      | Indica   | NA       |            |              |                          | 4-diphosphocytidyl-2C-methyl-D-erythritol synthase       |
| maker-9-augustus-gene-25.43-mRNA-1      | Indica   | NA       |            |              |                          |                                                          |
| maker-9-augustus-gene-41.6-mRNA-1       | Indica   | NA       |            | Os09g0248100 | OsR498G0916818100.01.T01 | Fasciclin-like arabinogalactan protein 2                 |
| maker-9-augustus-gene-52.39-mRNA-1      | Indica   | Indica   |            | Os09g0264400 | OsR498G0916863800.01.T01 | Flavonoid 3'-monooxygenase                               |
| maker-9-augustus-gene-53.34-mRNA-1      | Indica   | Indica   |            | Os05g0524500 | OsR498G0916869900.01.T01 | Putative serine/threonine-specific protein kinase        |
| maker-9-augustus-gene-54.0-mRNA-1       | Indica   | NA       |            | Os09g0266400 | OsR498G0916872700.01.T01 | Hydrolase acting on ester bonds                          |
| maker-9-augustus-gene-71.22-mRNA-1      | Indica   | NA       |            | Os04g0316800 |                          | Transposon protein, putative, unclassified               |
| maker-9-augustus-gene-72.0-mRNA-1       | Indica   | NA       |            |              |                          | DDE Tnp4 domain-containing protein (Fragment)            |
| maker-9-augustus-gene-84.12-mRNA-1      | Indica   | NA       |            |              |                          |                                                          |
| maker-9-augustus-gene-88.25-mRNA-1      | Indica   | NA       | NBS-TM     |              |                          | NBS-LRR protein (Fragment)                               |
| maker-9-augustus-gene-90.13-mRNA-1      | Indica   | NA       |            | Os09g0318600 | OsR498G0917118200.01.T02 | NAM-associated domain-containing protein                 |
| maker-9-augustus-gene-99.0-mRNA-1       | Indica   | NA       | LRR-NBS-TM | Os09g0327800 |                          | NBS-LRR disease resistance protein-like                  |
| augustus-1-processed-gene-1.67-mRNA-1   | Japonica | NA       |            |              | OsR498G0100004300.01.T04 | Ste24 endopeptidase (Fragment)                           |
| augustus-1-processed-gene-1.72-mRNA-1   | Japonica | NA       |            | Os01g0101600 | OsR498G0100006300.01.T06 | Nuclear protein-like                                     |
| augustus-1-processed-gene-100.51-mRNA-1 | Japonica | Japonica |            | Os01g0862500 | OsR498G0509898500.01.T01 | IQ-domain 25                                             |
| augustus-1-processed-gene-102.35-mRNA-1 | Japonica | NA       |            | Os01g0283400 | OsR498G0100680700.01.T01 |                                                          |
| augustus-1-processed-gene-105.7-mRNA-1  | Japonica | NA       |            |              | OsR498G0100702900.01.T01 | MADS-box domain-containing protein                       |
| augustus-1-processed-gene-106.19-mRNA-1 | Japonica | Japonica |            | Os01g0290600 | OsR498G0100711500.01.T01 | Putative L-cysteine desulfhydrase chloroplastic          |
| augustus-1-processed-gene-107.17-mRNA-1 | Japonica | NA       |            | Os01g0292700 | OsR498G0100721100.01.T03 | Myosin heavy chain, cardiac protein                      |
| augustus-1-processed-gene-108.20-mRNA-1 | Japonica | NA       |            | Os01g0293200 | OsR498G0100723300.01.T03 | PORR domain-containing protein (Fragment)                |
| augustus-1-processed-gene-110.23-mRNA-1 | Japonica | NA       |            | Os01g0298400 | OsR498G0100734500.01.T01 | Transcription factor MYB108                              |
| augustus-1-processed-gene-111.52-mRNA-1 | Japonica | NA       |            | Os01g0300400 |                          | ATP-dependent DNA helicase                               |
| augustus-1-processed-gene-113.11-mRNA-1 | Japonica | Japonica |            | Os01g0302900 | OsR498G0100517100.01.T01 |                                                          |
| augustus-1-processed-gene-113.13-mRNA-1 | Japonica | NA       |            | Os01g0303100 | OsR498G0100750300.01.T01 | Acidic endochitinase                                     |
| augustus-1-processed-gene-114.34-mRNA-1 | Japonica | NA       |            |              |                          | Transposable element protein, putative, MuDR             |
| augustus-1-processed-gene-115.16-mRNA-1 | Japonica | NA       |            | Os01g0306400 | OsR498G0100760300.01.T01 | DOG1 domain-containing protein (Fragment)                |
| augustus-1-processed-gene-117.14-mRNA-1 | Japonica | NA       |            | Os01g0309100 | OsR498G0100773300.01.T01 | Actin cytoskeleton-regulatory complex protein pan-1-like |
| augustus-1-processed-gene-118.39-mRNA-1 | Japonica | NA       |            | Os01g0311400 | OsR498G0100778900.01.T01 | RING-H2 finger protein ATL3F                             |
| augustus-1-processed-gene-119.52-mRNA-1 | Japonica | NA       |            | Os03g0110200 |                          | Transposon protein, putative, Mutator sub-class          |
| augustus-1-processed-gene-120.1-mRNA-1  | Japonica | Indica   |            | Os03g0341300 | OsR498G0100787900.01.T01 | Bidirectional sugar transporter SWEET                    |
| augustus-1-processed-gene-120.2-mRNA-1  | Japonica | NA       | NBS-TM     |              | OsR498G0100788500.01.T01 | NB-ARC domain-containing protein                         |
| augustus-1-processed-gene-121.18-mRNA-1 | Japonica | NA       |            |              | OsR498G0100073600.01.T01 |                                                          |
| augustus-1-processed-gene-122.10-mRNA-1 | Japonica | NA       |            | Os01g0317800 | OsR498G0100798100.01.T01 | Caffeoylshikimate esterase                               |
| augustus-1-processed-gene-123.7-mRNA-1  | Japonica | NA       |            |              | OsR498G0100809200.01.T01 |                                                          |
| augustus-1-processed-gene-125.19-mRNA-1 | Japonica | NA       |            |              |                          |                                                          |
| augustus-1-processed-gene-125.21-mRNA-1 | Japonica | NA       |            |              |                          | Putative mudrA protein-maize transposon MuDR             |
| augustus-1-processed-gene-125.23-mRNA-1 | Japonica | NA       |            |              | OsR498G0100824700.01.T01 | Carboxymethylenebutenolidase homolog                     |
| augustus-1-processed-gene-127.18-mRNA-1 | Japonica | Japonica |            | Os01g0327000 | OsR498G0100832700.01.T01 | Peroxidase                                               |
| augustus-1-processed-gene-129.4-mRNA-1  | Japonica | NA       |            | Os01g0330500 | OsR498G0100844100.01.T01 | Organic cation/carnitine transporter 3                   |
| augustus-1-processed-gene-13.21-mRNA-1  | Japonica | NA       |            | Os01g0125600 | OsR498G0100084700.01.T01 | Putative heavy metal-associated domain, HMA              |
| augustus-1-processed-gene-130.3-mRNA-1  | Japonica | NA       |            | Os10g0181100 | OsR498G0509574000.01.T01 |                                                          |
| augustus-1-processed-gene-133.14-mRNA-1 | Japonica | NA       |            |              | OsR498G0100073600.01.T01 | RNA binding protein                                      |
| augustus-1-processed-gene-134.35-mRNA-1 | Japonica | NA       |            | Os01g0337500 | OsR498G0100861300.01.T01 | H(+)-exporting diphosphatase                             |

|                                         |          |          |              |              |                          |                                                            |
|-----------------------------------------|----------|----------|--------------|--------------|--------------------------|------------------------------------------------------------|
| augustus-1-processed-gene-134.47-mRNA-1 | Japonica | NA       |              | Os01g0338200 | OsR498G0100863300.01.T01 | AMSH-like ubiquitin thiolesterase 3                        |
| augustus-1-processed-gene-135.19-mRNA-1 | Japonica | NA       |              | Os01g0339400 |                          |                                                            |
| augustus-1-processed-gene-135.33-mRNA-1 | Japonica | NA       |              |              | OsR498G0100867100.01.T01 | MADS-box domain-containing protein                         |
| augustus-1-processed-gene-136.18-mRNA-1 | Japonica | NA       |              | Os01g0342200 |                          | Cysteine-rich receptor-like protein kinase 15              |
| augustus-1-processed-gene-137.0-mRNA-1  | Japonica | NA       |              | Os01g0342700 | OsR498G0100880900.01.T01 | Pleiotropic drug resistance protein 4                      |
| augustus-1-processed-gene-137.12-mRNA-1 | Japonica | NA       |              | Os01g0343200 | OsR498G0100883700.01.T06 | Importin subunit alpha                                     |
| augustus-1-processed-gene-139.30-mRNA-1 | Japonica | Japonica |              | Os01g0347300 | OsR498G0100897900.01.T02 |                                                            |
| augustus-1-processed-gene-14.19-mRNA-1  | Japonica | NA       |              |              | OsR498G0511427100.01.T01 | Epstein-Barr virus EBNA-1-like                             |
| augustus-1-processed-gene-140.15-mRNA-1 | Japonica | NA       |              | Os01g0348700 | OsR498G0100901500.01.T01 | 60S ribosomal protein like                                 |
| augustus-1-processed-gene-141.8-mRNA-1  | Japonica | NA       |              | Os01g0350000 | OsR498G0100905900.01.T01 | (Z)-3-hexen-1-ol acetyltransferase                         |
| augustus-1-processed-gene-142.10-mRNA-1 | Japonica | NA       |              | Os01g0351300 | OsR498G0100909500.01.T03 | Exocyst complex component                                  |
| augustus-1-processed-gene-142.12-mRNA-1 | Japonica | NA       |              | Os01g0351800 | OsR498G0100911700.01.T01 | Fe2OG dioxygenase domain-containing protein (Fragment)     |
| augustus-1-processed-gene-144.31-mRNA-1 | Japonica | NA       |              | Os01g0355000 | OsR498G0100917100.01.T04 | Pentatricopeptide repeat-containing protein, chloroplastic |
| augustus-1-processed-gene-144.33-mRNA-1 | Japonica | NA       |              | Os01g0355400 |                          | MATH domain-containing protein                             |
| augustus-1-processed-gene-145.20-mRNA-1 | Japonica | NA       |              |              | OsR498G0100919100.01.T05 | probable phosphoinositide phosphatase SAC9                 |
| augustus-1-processed-gene-146.10-mRNA-1 | Japonica | Indica   |              | Os01g0357100 | OsR498G0100931900.01.T01 | Ferredoxin--nitrite reductase chloroplastic                |
| augustus-1-processed-gene-146.13-mRNA-1 | Japonica | NA       |              | Os01g0357800 | OsR498G0100933100.01.T05 | Pentatricopeptide (PPR) repeat-containing protein-like     |
| augustus-1-processed-gene-151.21-mRNA-1 | Japonica | Indica   | CC-Kinase-TM | Os01g0364400 | OsR498G0100957400.01.T01 | Wall-associated receptor kinase 3                          |
| augustus-1-processed-gene-152.17-mRNA-1 | Japonica | NA       | CC-Kinase    | Os01g0367700 | OsR498G0100962700.01.T05 | probable serine/threonine-protein kinase At1g54610         |
| augustus-1-processed-gene-153.3-mRNA-1  | Japonica | NA       |              | Os01g0368700 | OsR498G0100966100.01.T01 | DUF679 domain membrane protein 7                           |
| augustus-1-processed-gene-154.5-mRNA-1  | Japonica | NA       |              |              | OsR498G0511458200.01.T01 |                                                            |
| augustus-1-processed-gene-154.7-mRNA-1  | Japonica | NA       |              | Os01g0370600 | OsR498G0100971500.01.T01 | Glutathione transferase                                    |
| augustus-1-processed-gene-155.25-mRNA-1 | Japonica | NA       |              |              | OsR498G0100979300.01.T01 | DUF4220 domain-containing protein (Fragment)               |
| augustus-1-processed-gene-159.16-mRNA-1 | Japonica | NA       |              | Os03g0412050 |                          | Transposon protein, putative, Mutator sub-class, expressed |
| augustus-1-processed-gene-160.8-mRNA-1  | Japonica | NA       |              | Os01g0380800 | OsR498G0100999600.01.T01 | F-box domain-containing protein                            |
| augustus-1-processed-gene-162.13-mRNA-1 | Japonica | NA       |              |              | OsR498G0612612900.01.T01 | DUF834 domain-containing protein                           |
| augustus-1-processed-gene-162.22-mRNA-1 | Japonica | NA       |              |              |                          |                                                            |
| augustus-1-processed-gene-162.23-mRNA-1 | Japonica | NA       |              | Os07g0543700 | OsR498G0408675500.01.T01 | 4-diphosphocytidyl-2C-methyl-D-erythritol synthase         |
| augustus-1-processed-gene-162.24-mRNA-1 | Japonica | NA       |              | Os01g0383900 | OsR498G0101004300.01.T01 | Nuclear pore complex protein NUP98A                        |
| augustus-1-processed-gene-162.25-mRNA-1 | Japonica | Indica   | Kinase-TM    | Os01g0384300 | OsR498G0101005100.01.T01 | LRR receptor-like serine/threonine-protein kinase RKF3     |
| augustus-1-processed-gene-166.18-mRNA-1 | Japonica | NA       |              | Os01g0389700 | OsR498G0101026700.01.T01 | DUF679 domain membrane protein 7                           |
| augustus-1-processed-gene-166.23-mRNA-1 | Japonica | NA       |              | Os01g0390600 | OsR498G0101029900.01.T05 | tRNA (guanine(37)-N1)-methyltransferase                    |
| augustus-1-processed-gene-166.3-mRNA-1  | Japonica | NA       |              | Os01g0389200 | OsR498G0101025500.01.T01 | DUF679 domain membrane protein 7                           |
| augustus-1-processed-gene-179.10-mRNA-1 | Japonica | NA       |              | Os03g0154300 | OsR498G0203061400.01.T01 |                                                            |
| augustus-1-processed-gene-180.6-mRNA-1  | Japonica | NA       |              | Os01g0500900 | OsR498G0101059100.01.T01 | Tyrosine--tRNA ligase                                      |
| augustus-1-processed-gene-181.31-mRNA-1 | Japonica | NA       |              |              | OsR498G0101068100.01.T01 |                                                            |
| augustus-1-processed-gene-183.20-mRNA-1 | Japonica | NA       |              |              | OsR498G0101077500.01.T01 | Retrotransposon protein, putative, unclassified            |
| augustus-1-processed-gene-184.10-mRNA-1 | Japonica | NA       |              | Os01g0507500 | OsR498G0101082100.01.T01 | Ell-associated factor Eaf like                             |
| augustus-1-processed-gene-185.0-mRNA-1  | Japonica | NA       |              | Os01g0508100 | OsR498G0101085900.01.T01 |                                                            |
| augustus-1-processed-gene-186.0-mRNA-1  | Japonica | NA       |              |              | OsR498G0510283100.01.T01 | Retrotransposon protein, putative, unclassified            |
| augustus-1-processed-gene-187.14-mRNA-1 | Japonica | NA       |              |              | OsR498G0101105700.01.T01 | AP-3 complex subunit delta                                 |
| augustus-1-processed-gene-188.1-mRNA-1  | Japonica | Japonica |              | Os01g0512700 | OsR498G0101106700.01.T01 | Yin/yang transcription factor                              |
| augustus-1-processed-gene-191.13-mRNA-1 | Japonica | NA       |              |              | OsR498G0101121100.01.T01 | Luminal-binding protein 4                                  |
| augustus-1-processed-gene-194.22-mRNA-1 | Japonica | NA       |              |              | OsR498G0101140500.01.T01 |                                                            |
| augustus-1-processed-gene-198.17-mRNA-1 | Japonica | NA       |              |              | OsR498G0713993600.01.T01 | Putative zinc finger, CCHC-type                            |
| augustus-1-processed-gene-198.5-mRNA-1  | Japonica | NA       |              | Os01g0530400 | OsR498G0101163500.01.T07 | Monothiol glutaredoxin                                     |
| augustus-1-processed-gene-199.19-mRNA-1 | Japonica | NA       |              | Os01g0532100 | OsR498G0101168500.01.T01 |                                                            |
| augustus-1-processed-gene-199.31-mRNA-1 | Japonica | NA       |              |              |                          | Condensin complex subunit 2                                |
| augustus-1-processed-gene-2.43-mRNA-1   | Japonica | Indica   |              | Os01g0102400 | OsR498G0100011300.01.T01 | Histone domain-containing protein                          |
| augustus-1-processed-gene-2.48-mRNA-1   | Japonica | NA       |              | Os01g0103100 | OsR498G0100013300.01.T01 | Major facilitator superfamily protein isoform 1            |
| augustus-1-processed-gene-221.13-mRNA-1 | Japonica | NA       |              | Os01g0563000 | OsR498G0101346000.01.T07 | Peptidylprolyl isomerase                                   |
| augustus-1-processed-gene-223.13-mRNA-1 | Japonica | NA       |              |              | OsR498G0101356600.01.T01 |                                                            |
| augustus-1-processed-gene-226.45-mRNA-1 | Japonica | NA       |              |              | OsR498G0101371100.01.T01 |                                                            |
| augustus-1-processed-gene-226.46-mRNA-1 | Japonica | NA       |              |              | OsR498G0101371500.01.T01 |                                                            |
| augustus-1-processed-gene-230.28-mRNA-1 | Japonica | NA       |              |              | OsR498G0101393500.01.T01 | Regulatory protein B-Peru-like                             |
| augustus-1-processed-gene-231.38-mRNA-1 | Japonica | NA       |              | Os01g0578800 |                          |                                                            |
| augustus-1-processed-gene-231.54-mRNA-1 | Japonica | NA       |              | Os01g0579800 | OsR498G0101399700.01.T01 | DEAD-box ATP-dependent RNA helicase 20                     |
| augustus-1-processed-gene-232.42-mRNA-1 | Japonica | NA       |              |              | OsR498G0101403900.01.T01 |                                                            |
| augustus-1-processed-gene-233.12-mRNA-1 | Japonica | NA       |              |              |                          | Translation initiation factor                              |
| augustus-1-processed-gene-233.25-mRNA-1 | Japonica | NA       |              |              |                          | Zinc ion binding                                           |
| augustus-1-processed-gene-235.12-mRNA-1 | Japonica | Indica   |              | Os01g0597400 | OsR498G0101422900.01.T01 | Vacuolar amino acid transporter like                       |

|                                         |          |          |           |              |                          |                                                            |
|-----------------------------------------|----------|----------|-----------|--------------|--------------------------|------------------------------------------------------------|
| augustus-1-processed-gene-237.19-mRNA-1 | Japonica | NA       |           | Os01g0589300 | OsR498G0101436500.01.T01 | MYB transcription factor                                   |
| augustus-1-processed-gene-238.17-mRNA-1 | Japonica | NA       |           | Os02g0547100 |                          | Transposon protein, putative, Mutator sub-class, expressed |
| augustus-1-processed-gene-239.8-mRNA-1  | Japonica | NA       |           | Os01g0593600 | OsR498G0101455300.01.T01 |                                                            |
| augustus-1-processed-gene-241.11-mRNA-1 | Japonica | NA       |           | Os07g0433200 | OsR498G0510328900.01.T01 | Retrotransposon protein, putative, Ty1-copia subclass      |
| augustus-1-processed-gene-258.26-mRNA-1 | Japonica | Japonica |           | Os01g0629600 | OsR498G0511411500.01.T01 | Carboxypeptidase                                           |
| augustus-1-processed-gene-263.18-mRNA-1 | Japonica | NA       |           | Os01g0638000 | OsR498G0101614100.01.T01 | Glycosyltransferase                                        |
| augustus-1-processed-gene-263.38-mRNA-1 | Japonica | NA       |           | Os01g0638600 | OsR498G0101615700.01.T01 | Glycosyltransferase                                        |
| augustus-1-processed-gene-266.23-mRNA-1 | Japonica | Japonica |           | Os01g0643900 | OsR498G0511392000.01.T01 |                                                            |
| augustus-1-processed-gene-266.30-mRNA-1 | Japonica | NA       |           | Os01g0644900 | OsR498G0101640300.01.T01 |                                                            |
| augustus-1-processed-gene-267.31-mRNA-1 | Japonica | NA       |           |              | OsR498G0101644900.01.T01 | Pentatricopeptide repeat                                   |
| augustus-1-processed-gene-267.50-mRNA-1 | Japonica | NA       |           | Os01g0646300 | OsR498G0101645600.01.T01 | DELLA transcription factor                                 |
| augustus-1-processed-gene-269.39-mRNA-1 | Japonica | Japonica |           | Os01g0649300 | OsR498G0101656100.01.T02 | GDSL esterase/lipase                                       |
| augustus-1-processed-gene-269.56-mRNA-1 | Japonica | NA       |           |              | OsR498G1119312200.01.T01 | Non-specific serine/threonine protein kinase               |
| augustus-1-processed-gene-269.58-mRNA-1 | Japonica | NA       |           | Os01g0650200 | OsR498G0101658300.01.T01 | GDSL esterase/lipase                                       |
| augustus-1-processed-gene-269.60-mRNA-1 | Japonica | NA       |           |              | OsR498G0204046800.01.T01 | Epstein-Barr virus EBNA-1-like                             |
| augustus-1-processed-gene-270.28-mRNA-1 | Japonica | Indica   |           | Os01g0651100 | OsR498G0101660900.01.T05 | Pentatricopeptide repeat-containing protein                |
| augustus-1-processed-gene-270.42-mRNA-1 | Japonica | NA       |           | Os01g0651500 | OsR498G0101661700.01.T01 | Wax synthase isoform 3                                     |
| augustus-1-processed-gene-271.11-mRNA-1 | Japonica | NA       |           | Os01g0653200 | OsR498G0101668900.01.T01 | UDP-Glycosyltransferase superfamily protein                |
| augustus-1-processed-gene-271.2-mRNA-1  | Japonica | NA       |           | Os01g0652700 | OsR498G0101665900.01.T01 | Calcineurin B-like protein 1                               |
| augustus-1-processed-gene-273.41-mRNA-1 | Japonica | NA       |           |              | OsR498G0101679300.01.T01 |                                                            |
| augustus-1-processed-gene-273.66-mRNA-1 | Japonica | NA       |           |              |                          | Eukaryotic translation initiation factor 3 subunit 10      |
| augustus-1-processed-gene-275.15-mRNA-1 | Japonica | Indica   |           | Os01g0659800 | OsR498G0101693700.01.T01 | C2 domain-containing protein                               |
| augustus-1-processed-gene-275.17-mRNA-1 | Japonica | NA       |           | Os01g0660200 | OsR498G0101694700.01.T03 | Acidic endochitinase                                       |
| augustus-1-processed-gene-275.8-mRNA-1  | Japonica | NA       |           | Os01g0658300 |                          | Glutaminyl-tRNA synthetase                                 |
| augustus-1-processed-gene-277.26-mRNA-1 | Japonica | NA       |           | Os01g0664100 | OsR498G0101705900.01.T02 | zinc transport protein ZntB-like isoform X2                |
| augustus-1-processed-gene-278.1-mRNA-1  | Japonica | NA       |           |              | OsR498G0101707500.01.T01 |                                                            |
| augustus-1-processed-gene-278.5-mRNA-1  | Japonica | NA       |           | Os02g0733600 | OsR498G1018053500.01.T01 |                                                            |
| augustus-1-processed-gene-28.49-mRNA-1  | Japonica | NA       |           | Os01g0151900 | OsR498G0100184700.01.T01 | Pentatricopeptide repeat                                   |
| augustus-1-processed-gene-280.9-mRNA-1  | Japonica | NA       |           |              | OsR498G0101725500.01.T01 |                                                            |
| augustus-1-processed-gene-281.14-mRNA-1 | Japonica | NA       |           |              | OsR498G0612788100.01.T01 |                                                            |
| augustus-1-processed-gene-283.12-mRNA-1 | Japonica | NA       |           |              | OsR498G0100324300.01.T01 | Cyclic dof factor like                                     |
| augustus-1-processed-gene-285.22-mRNA-1 | Japonica | Indica   |           | Os01g0677900 | OsR498G0101757700.01.T01 | CCHC-type domain-containing protein                        |
| augustus-1-processed-gene-285.23-mRNA-1 | Japonica | Japonica |           | Os01g0678000 | OsR498G0101758100.01.T01 | CCHC-type domain-containing protein                        |
| augustus-1-processed-gene-285.24-mRNA-1 | Japonica | NA       |           | Os01g0678100 |                          |                                                            |
| augustus-1-processed-gene-286.15-mRNA-1 | Japonica | NA       |           | Os01g0680200 | OsR498G0101765100.01.T01 | Purine permease                                            |
| augustus-1-processed-gene-286.9-mRNA-1  | Japonica | NA       |           | Os01g0679500 |                          | Peptidase A1 domain-containing protein (Fragment)          |
| augustus-1-processed-gene-287.1-mRNA-1  | Japonica | NA       |           | Os01g0680600 | OsR498G0101767700.01.T01 | TAFLI28 domain-containing protein                          |
| augustus-1-processed-gene-289.45-mRNA-1 | Japonica | NA       |           | Os01g0685000 |                          | USP domain-containing protein                              |
| augustus-1-processed-gene-289.49-mRNA-1 | Japonica | Japonica |           | Os01g0686000 | OsR498G0101785300.01.T01 | DUF4228 domain-containing protein (Fragment)               |
| augustus-1-processed-gene-289.51-mRNA-1 | Japonica | NA       |           | Os01g0686200 | OsR498G0101785900.01.T01 | Glycosyltransferase                                        |
| augustus-1-processed-gene-290.33-mRNA-1 | Japonica | NA       |           | Os01g0686300 | OsR498G0101786500.01.T01 | UDP-glucosyltransferase                                    |
| augustus-1-processed-gene-290.35-mRNA-1 | Japonica | Indica   |           | Os01g0686500 | OsR498G0101787300.01.T01 |                                                            |
| augustus-1-processed-gene-290.55-mRNA-1 | Japonica | Indica   |           | Os05g0551700 | OsR498G0101792300.01.T01 | Adenylate isopentenyltransferase                           |
| augustus-1-processed-gene-291.37-mRNA-1 | Japonica | NA       |           | Os05g0269800 | OsR498G0409509300.01.T01 | Transposon protein, putative, CACTA, En/Spm sub-class      |
| augustus-1-processed-gene-292.59-mRNA-1 | Japonica | Indica   |           | Os01g0691600 | OsR498G0101801900.01.T03 | DNA helicase                                               |
| augustus-1-processed-gene-295.15-mRNA-1 | Japonica | Indica   |           | Os01g0696800 | OsR498G0101823100.01.T01 | Peptidase A1 domain-containing protein (Fragment)          |
| augustus-1-processed-gene-296.25-mRNA-1 | Japonica | Japonica | Kinase-TM | Os01g0699400 | OsR498G0101831600.01.T01 | Mitogen-activated protein kinase kinase kinase A           |
| augustus-1-processed-gene-298.58-mRNA-1 | Japonica | Indica   |           | Os01g0704100 | OsR498G0101845100.01.T01 | Nitrate transporter                                        |
| augustus-1-processed-gene-299.40-mRNA-1 | Japonica | NA       |           | Os01g0705700 | OsR498G0101853300.01.T01 | BHLH transcription factor                                  |
| augustus-1-processed-gene-3.52-mRNA-1   | Japonica | NA       |           | Os01g0104400 | OsR498G0100016300.01.T01 | Stress responsive protein 1                                |
| augustus-1-processed-gene-300.27-mRNA-1 | Japonica | NA       |           | Os01g0706600 | OsR498G0101856700.01.T01 |                                                            |
| augustus-1-processed-gene-300.54-mRNA-1 | Japonica | NA       |           | Os07g0513300 |                          | Transposon protein, putative, Mutator sub-class, expressed |
| augustus-1-processed-gene-301.49-mRNA-1 | Japonica | NA       |           | Os01g0708100 | OsR498G0101861900.01.T01 | Glycylpeptide N-tetradecanoyltransferase                   |
| augustus-1-processed-gene-301.61-mRNA-1 | Japonica | NA       |           |              | OsR498G0307184000.01.T01 | DH domain-containing protein                               |
| augustus-1-processed-gene-302.67-mRNA-1 | Japonica | NA       |           |              | OsR498G0101872100.01.T01 |                                                            |
| augustus-1-processed-gene-304.43-mRNA-1 | Japonica | Indica   |           | Os01g0715200 | OsR498G0101882900.01.T01 |                                                            |
| augustus-1-processed-gene-304.48-mRNA-1 | Japonica | Japonica |           | Os01g0715700 | OsR498G0101885900.01.T01 | Pentatricopeptide repeat                                   |
| augustus-1-processed-gene-307.31-mRNA-1 | Japonica | NA       |           |              | OsR498G0101907500.01.T03 | GDSL esterase/lipase                                       |
| augustus-1-processed-gene-307.41-mRNA-1 | Japonica | Japonica |           | Os01g0720500 | OsR498G0101476300.01.T01 | Chlorophyll a-b binding protein, chloroplastic             |
| augustus-1-processed-gene-307.44-mRNA-1 | Japonica | NA       |           | Os01g0721000 | OsR498G0101910700.01.T05 | Fusarium resistance protein I2C-5-like                     |
| augustus-1-processed-gene-307.47-mRNA-1 | Japonica | Indica   |           | Os01g0721500 | OsR498G0101911900.01.T01 | Fusarium resistance protein I2C-5-like                     |

|                                         |          |          |           |              |                          |                                                                         |
|-----------------------------------------|----------|----------|-----------|--------------|--------------------------|-------------------------------------------------------------------------|
| augustus-1-processed-gene-308.60-mRNA-1 | Japonica | NA       |           | Os01g0722800 | OsR498G0101916100.01.T01 | 4-hydroxy-4-methyl-2-oxoglutarate aldolase                              |
| augustus-1-processed-gene-308.66-mRNA-1 | Japonica | Indica   |           | Os01g0723400 | OsR498G0101918500.01.T03 | Malic enzyme                                                            |
| augustus-1-processed-gene-309.10-mRNA-1 | Japonica | NA       |           | Os07g0121500 |                          |                                                                         |
| augustus-1-processed-gene-309.9-mRNA-1  | Japonica | Japonica |           | Os01g0724700 | OsR498G0101922900.01.T01 | Lachrymatory-factor synthase                                            |
| augustus-1-processed-gene-310.17-mRNA-1 | Japonica | NA       |           |              | OsR498G0101932500.01.T04 |                                                                         |
| augustus-1-processed-gene-311.1-mRNA-1  | Japonica | NA       | LRR-TM    | Os01g0729400 | OsR498G0101933900.01.T01 | Receptor like protein 29                                                |
| augustus-1-processed-gene-312.11-mRNA-1 | Japonica | NA       |           |              | OsR498G0101940700.01.T01 | Ubiquitin-60S ribosomal protein L40                                     |
| augustus-1-processed-gene-312.15-mRNA-1 | Japonica | NA       |           | Os01g0732300 | OsR498G0101942300.01.T01 | Transcription repressor                                                 |
| augustus-1-processed-gene-313.24-mRNA-1 | Japonica | NA       |           | Os01g0733500 | OsR498G0101946900.01.T03 | BURP domain-containing protein 3                                        |
| augustus-1-processed-gene-313.38-mRNA-1 | Japonica | NA       |           | Os01g0734501 |                          |                                                                         |
| augustus-1-processed-gene-313.39-mRNA-1 | Japonica | NA       |           | Os01g0734600 | OsR498G0101949900.01.T03 | Glycosyltransferase                                                     |
| augustus-1-processed-gene-313.43-mRNA-1 | Japonica | NA       |           | Os01g0735300 | OsR498G0101951500.01.T01 | Glycosyltransferase                                                     |
| augustus-1-processed-gene-314.51-mRNA-1 | Japonica | NA       |           | Os02g0212975 | OsR498G0305421900.01.T01 |                                                                         |
| augustus-1-processed-gene-314.54-mRNA-1 | Japonica | NA       |           | Os01g0737600 | OsR498G0101957500.01.T01 | Werner syndrome ATP-dependent helicase                                  |
| augustus-1-processed-gene-314.55-mRNA-1 | Japonica | NA       |           | Os01g0737700 | OsR498G0101957700.01.T01 | 3'-5' exonuclease domain-containing protein (Fragment)                  |
| augustus-1-processed-gene-315.5-mRNA-1  | Japonica | NA       |           | Os01g0738400 | OsR498G0101960500.01.T01 | Zinc finger CCH domain-containing protein 2                             |
| augustus-1-processed-gene-316.39-mRNA-1 | Japonica | NA       |           | Os01g0740800 |                          |                                                                         |
| augustus-1-processed-gene-322.37-mRNA-1 | Japonica | NA       |           |              | OsR498G0102004100.01.T01 | F-box domain-containing protein (Fragment)                              |
| augustus-1-processed-gene-322.48-mRNA-1 | Japonica | Japonica |           | Os01g0751400 | OsR498G0511182600.01.T01 | Inorganic diphosphatase                                                 |
| augustus-1-processed-gene-322.54-mRNA-1 | Japonica | NA       |           | Os01g0752500 |                          | Pathogenesis-related transcriptional activator like                     |
| augustus-1-processed-gene-323.15-mRNA-1 | Japonica | NA       |           | Os01g0753800 | OsR498G0102010900.01.T02 | Translation initiation factor IF-2-like                                 |
| augustus-1-processed-gene-324.26-mRNA-1 | Japonica | NA       |           | Os01g0755700 | OsR498G0102015300.01.T01 | RING-H2 finger protein ATL2K                                            |
| augustus-1-processed-gene-325.45-mRNA-1 | Japonica | NA       |           |              | OsR498G0204046800.01.T01 | Circumsporozoite protein-like                                           |
| augustus-1-processed-gene-327.0-mRNA-1  | Japonica | Indica   |           | Os01g0760000 | OsR498G0102038900.01.T02 | Dynein light chain                                                      |
| augustus-1-processed-gene-327.1-mRNA-1  | Japonica | Indica   |           | Os01g0760300 | OsR498G0102039300.01.T02 | PRONE domain-containing protein                                         |
| augustus-1-processed-gene-327.10-mRNA-1 | Japonica | NA       |           | Os01g0760600 | OsR498G0102040200.01.T01 | Aspartate aminotransferase                                              |
| augustus-1-processed-gene-327.12-mRNA-1 | Japonica | NA       |           | Os01g0761000 | OsR498G0102040900.01.T03 | Cyanobacterial aminoacyl-tRNA synthetase, CAAD domain containing protei |
| augustus-1-processed-gene-328.52-mRNA-1 | Japonica | Japonica |           | Os01g0763650 | OsR498G0102047500.01.T02 | Chlororespiratory reduction 7                                           |
| augustus-1-processed-gene-328.53-mRNA-1 | Japonica | NA       |           | Os01g0763700 | OsR498G0102047500.01.T03 | Exocyst subunit Exo70 family protein (Fragment)                         |
| augustus-1-processed-gene-329.51-mRNA-1 | Japonica | NA       |           |              | OsR498G0102053700.01.T01 | Zinc finger A20 and AN1 domain-containing stress-associated protein 3   |
| augustus-1-processed-gene-331.36-mRNA-1 | Japonica | NA       |           | Os01g0768333 |                          |                                                                         |
| augustus-1-processed-gene-331.38-mRNA-1 | Japonica | NA       |           |              | OsR498G0204046800.01.T01 | Circumsporozoite protein-like                                           |
| augustus-1-processed-gene-331.40-mRNA-1 | Japonica | NA       |           | Os02g0547100 | OsR498G0510938300.01.T01 | Transposon mutator sub-class                                            |
| augustus-1-processed-gene-331.48-mRNA-1 | Japonica | NA       |           | Os01g0769000 | OsR498G0102062300.01.T06 | Topoisomerase II-associated protein PAT1                                |
| augustus-1-processed-gene-331.52-mRNA-1 | Japonica | NA       | Kinase-TM | Os01g0769700 | OsR498G0102064500.01.T01 | Receptor-like protein kinase FERONIA                                    |
| augustus-1-processed-gene-334.41-mRNA-1 | Japonica | NA       |           | Os01g0774300 |                          | DUF295 domain-containing protein                                        |
| augustus-1-processed-gene-334.43-mRNA-1 | Japonica | NA       |           |              | OsR498G0511427100.01.T01 | Epstein-Barr virus EBNA-1-like                                          |
| augustus-1-processed-gene-335.9-mRNA-1  | Japonica | NA       |           | Os01g0776300 |                          | Gnk2-homologous domain-containing protein                               |
| augustus-1-processed-gene-336.57-mRNA-1 | Japonica | Indica   |           | Os01g0778100 | OsR498G0102093700.01.T01 | Protein UPSTREAM OF FLC isoform B                                       |
| augustus-1-processed-gene-337.1-mRNA-1  | Japonica | NA       | Kinase-TM | Os01g0779300 | OsR498G0102097100.01.T01 | Non-specific serine/threonine protein kinase                            |
| augustus-1-processed-gene-338.41-mRNA-1 | Japonica | NA       |           | Os01g0783100 | OsR498G0102106700.01.T04 | Pentatricopeptide repeat-containing protein                             |
| augustus-1-processed-gene-339.2-mRNA-1  | Japonica | Japonica | Kinase-TM | Os01g0784200 | OsR498G0102109300.01.T01 | Receptor-like serine/threonine-protein kinase                           |
| augustus-1-processed-gene-339.20-mRNA-1 | Japonica | NA       |           | Os01g0784800 | OsR498G0102111100.01.T02 | NAD(P)H dehydrogenase (quinone)                                         |
| augustus-1-processed-gene-339.26-mRNA-1 | Japonica | NA       |           | Os01g0785700 | OsR498G0102115700.01.T05 | Pentatricopeptide repeat-containing protein mitochondrial               |
| augustus-1-processed-gene-339.4-mRNA-1  | Japonica | NA       | Kinase-TM | Os01g0784200 |                          | Non-specific serine/threonine protein kinase                            |
| augustus-1-processed-gene-341.6-mRNA-1  | Japonica | NA       |           | Os03g0110200 |                          | Transposon protein, putative, Mutator sub-class                         |
| augustus-1-processed-gene-342.1-mRNA-1  | Japonica | Indica   |           | Os01g0793200 | OsR498G0102128300.01.T02 | Pentatricopeptide repeat-containing protein mitochondrial               |
| augustus-1-processed-gene-343.10-mRNA-1 | Japonica | NA       |           |              |                          | Inositol-1,4,5-trisphosphate 5-phosphatase 4 isoform 1                  |
| augustus-1-processed-gene-343.19-mRNA-1 | Japonica | NA       |           |              | OsR498G0100073600.01.T01 | RNA binding protein                                                     |
| augustus-1-processed-gene-343.25-mRNA-1 | Japonica | NA       |           | Os01g0795600 | OsR498G0102135900.01.T01 |                                                                         |
| augustus-1-processed-gene-343.28-mRNA-1 | Japonica | Japonica |           | Os01g0796001 | OsR498G0102135900.01.T01 | Type II secretion system protein D                                      |
| augustus-1-processed-gene-344.34-mRNA-1 | Japonica | NA       |           | Os01g0797600 | OsR498G0102141700.01.T01 | Ethylene responsive element binding factor3                             |
| augustus-1-processed-gene-345.19-mRNA-1 | Japonica | NA       |           | Os01g0800400 | OsR498G0102184800.01.T02 | Spo11/DNA topoisomerase VI, subunit A protein                           |
| augustus-1-processed-gene-345.2-mRNA-1  | Japonica | NA       | NBS-TM    | Os01g0799100 | OsR498G0102144900.01.T02 | NB-ARC domain-containing protein                                        |
| augustus-1-processed-gene-346.23-mRNA-1 | Japonica | NA       |           |              |                          | AAI domain-containing protein                                           |
| augustus-1-processed-gene-346.33-mRNA-1 | Japonica | Indica   |           | Os05g0495200 | OsR498G0102154100.01.T04 | Basic leucine zipper like                                               |
| augustus-1-processed-gene-346.34-mRNA-1 | Japonica | NA       |           | Os01g0802000 | OsR498G0102154700.01.T01 | RING-type E3 ubiquitin transferase                                      |
| augustus-1-processed-gene-348.38-mRNA-1 | Japonica | Indica   |           | Os01g0805100 | OsR498G0102165700.01.T01 | Glycoside hydrolase starch-binding domain-containing family protein     |
| augustus-1-processed-gene-38.5-mRNA-1   | Japonica | NA       |           |              | OsR498G0511311000.01.T01 |                                                                         |
| augustus-1-processed-gene-39.50-mRNA-1  | Japonica | NA       |           | Os01g0175500 | OsR498G0100251500.01.T01 | DUF1618 domain-containing protein (Fragment)                            |
| augustus-1-processed-gene-39.73-mRNA-1  | Japonica | NA       |           | Os01g0176800 | OsR498G0100256900.01.T01 |                                                                         |

|                                         |          |          |           |              |                          |                                                                        |
|-----------------------------------------|----------|----------|-----------|--------------|--------------------------|------------------------------------------------------------------------|
| augustus-1-processed-gene-4.42-mRNA-1   | Japonica | NA       |           | Os01g0105500 |                          |                                                                        |
| augustus-1-processed-gene-4.45-mRNA-1   | Japonica | NA       |           | Os01g0106200 | OsR498G0100022900.01.T01 | Peptidylprolyl isomerase                                               |
| augustus-1-processed-gene-40.0-mRNA-1   | Japonica | NA       |           | Os01g0177100 | OsR498G0100258100.01.T04 | Transcriptional corepressor LEUNIG                                     |
| augustus-1-processed-gene-40.17-mRNA-1  | Japonica | NA       |           |              | OsR498G0100261400.01.T01 | Retrotransposon protein, putative, unclassified, expressed             |
| augustus-1-processed-gene-41.38-mRNA-1  | Japonica | NA       |           | Os01g0178600 | OsR498G0100265100.01.T01 | Peptidase A1 domain-containing protein                                 |
| augustus-1-processed-gene-41.46-mRNA-1  | Japonica | NA       |           | Os01g0178700 | OsR498G0100266100.01.T05 | RING-type domain-containing protein (Fragment)                         |
| augustus-1-processed-gene-45.13-mRNA-1  | Japonica | NA       |           | Os01g0183800 | OsR498G0100284500.01.T01 | DUF295 domain-containing protein                                       |
| augustus-1-processed-gene-45.20-mRNA-1  | Japonica | Japonica |           | Os01g0184700 | OsR498G0100286300.01.T01 | FACT complex subunit SSRP1                                             |
| augustus-1-processed-gene-475.12-mRNA-1 | Japonica | NA       |           | Os01g0913800 | OsR498G0102563100.01.T01 | Fertility restorer homologue-like                                      |
| augustus-1-processed-gene-476.50-mRNA-1 | Japonica | NA       |           | Os09g0552200 | OsR498G0306910900.01.T01 | Zinc finger (C3HC4 type RING finger) protein, putative                 |
| augustus-1-processed-gene-478.3-mRNA-1  | Japonica | Japonica |           | Os01g0919300 | OsR498G0102583100.01.T01 | Sad1/UNC domain-containing protein, putative                           |
| augustus-1-processed-gene-479.17-mRNA-1 | Japonica | Japonica |           | Os01g0921100 | OsR498G0102592100.01.T01 | Regulatory protein-like                                                |
| augustus-1-processed-gene-479.20-mRNA-1 | Japonica | Indica   |           | Os01g0921400 | OsR498G0102593100.01.T01 | Exocyst subunit Exo70 family protein (Fragment)                        |
| augustus-1-processed-gene-480.10-mRNA-1 | Japonica | NA       |           | Os08g0561800 | OsR498G1120733700.01.T01 | Retrotransposon protein, putative, Ty3-gypsy sub-class                 |
| augustus-1-processed-gene-481.12-mRNA-1 | Japonica | NA       |           | Os01g0923800 | OsR498G0102610500.01.T01 | J domain-containing protein                                            |
| augustus-1-processed-gene-481.14-mRNA-1 | Japonica | NA       |           | Os01g0924200 | OsR498G0102612100.01.T01 | B-cell lymphoma leukemia 11A isoform X1                                |
| augustus-1-processed-gene-482.0-mRNA-1  | Japonica | NA       |           | Os01g0924400 | OsR498G0102613700.01.T03 | TCP transcription factor                                               |
| augustus-1-processed-gene-482.2-mRNA-1  | Japonica | NA       |           | Os01g0924900 | OsR498G0102614900.01.T01 | glutamic acid-rich protein isoform X2                                  |
| augustus-1-processed-gene-484.34-mRNA-1 | Japonica | NA       | Kinase-TM | Os01g0927500 | OsR498G0102625300.01.T03 | Inactive leucine-rich repeat receptor-like protein kinase CORYNE       |
| augustus-1-processed-gene-488.1-mRNA-1  | Japonica | Japonica |           | Os01g0936000 | OsR498G0102656100.01.T01 | Glutaredoxin domain-containing protein (Fragment)                      |
| augustus-1-processed-gene-489.1-mRNA-1  | Japonica | NA       |           | Os01g0937600 | OsR498G0102663900.01.T01 | Basic 7S globulin 2                                                    |
| augustus-1-processed-gene-489.2-mRNA-1  | Japonica | NA       |           | Os01g0937800 | OsR498G0102664300.01.T01 | Basic 7S globulin 2                                                    |
| augustus-1-processed-gene-489.22-mRNA-1 | Japonica | NA       |           | Os01g0939500 | OsR498G0102668500.01.T01 | Eukaryotic peptide chain release factor subunit                        |
| augustus-1-processed-gene-489.3-mRNA-1  | Japonica | NA       |           | Os01g0937900 | OsR498G0102664700.01.T01 | Classical arabinogalactan protein 26-like                              |
| augustus-1-processed-gene-489.4-mRNA-1  | Japonica | NA       |           |              | OsR498G0102665100.01.T01 | PPR-repeat protein-like                                                |
| augustus-1-processed-gene-492.12-mRNA-1 | Japonica | NA       |           |              | OsR498G0102679100.01.T01 |                                                                        |
| augustus-1-processed-gene-492.24-mRNA-1 | Japonica | NA       |           |              | OsR498G0102681100.01.T07 | Retrotransposon protein, putative, unclassified                        |
| augustus-1-processed-gene-493.14-mRNA-1 | Japonica | NA       |           |              |                          | ENTH domain-containing protein                                         |
| augustus-1-processed-gene-493.15-mRNA-1 | Japonica | NA       |           |              | OsR498G0102687100.01.T01 |                                                                        |
| augustus-1-processed-gene-493.17-mRNA-1 | Japonica | NA       |           |              | OsR498G0102687300.01.T01 |                                                                        |
| augustus-1-processed-gene-493.2-mRNA-1  | Japonica | NA       |           | Os01g0941400 | OsR498G0102675700.01.T01 | Truncated pathogenesis-related protein 6                               |
| augustus-1-processed-gene-496.59-mRNA-1 | Japonica | NA       |           | Os01g0950300 | OsR498G0102702900.01.T01 | Glutathione S-transferase GST 29                                       |
| augustus-1-processed-gene-497.8-mRNA-1  | Japonica | NA       |           | Os01g0953100 | OsR498G0102710700.01.T01 | 1-phosphatidylinositol 4,5-bisphosphate phosphodiesterase beta-1       |
| augustus-1-processed-gene-498.4-mRNA-1  | Japonica | Indica   |           | Os01g0955100 | OsR498G0102722100.01.T01 | Putative calcium-binding protein CML19                                 |
| augustus-1-processed-gene-499.37-mRNA-1 | Japonica | NA       |           |              | OsR498G0102729500.01.T01 |                                                                        |
| augustus-1-processed-gene-499.43-mRNA-1 | Japonica | NA       |           |              | OsR498G0102733100.01.T01 | 5-epiaristolochene 13-dihydroxylase                                    |
| augustus-1-processed-gene-5.14-mRNA-1   | Japonica | Japonica |           | Os01g0108500 | OsR498G0101358900.01.T01 | BHLH domain-containing protein                                         |
| augustus-1-processed-gene-500.93-mRNA-1 | Japonica | NA       |           | Os01g0960000 | OsR498G0102739900.01.T01 | probable gamma-secretase subunit PEN-2                                 |
| augustus-1-processed-gene-501.73-mRNA-1 | Japonica | NA       |           | Os01g0961000 |                          |                                                                        |
| augustus-1-processed-gene-503.48-mRNA-1 | Japonica | Indica   |           | Os01g0964800 | OsR498G0102752500.01.T01 | E3 ubiquitin-protein ligase HERC2                                      |
| augustus-1-processed-gene-503.49-mRNA-1 | Japonica | NA       |           | Os01g0964900 | OsR498G0102752700.01.T01 | Protein MITOFERRINLIKE 1 chloroplastic                                 |
| augustus-1-processed-gene-503.61-mRNA-1 | Japonica | NA       |           |              |                          | Acyl-CoA N-acyltransferase with RING/FYVE/PHD-type zinc finger protein |
| augustus-1-processed-gene-503.63-mRNA-1 | Japonica | NA       |           | Os01g0966300 | OsR498G0102757100.01.T05 | Mitochondrial processing peptidase                                     |
| augustus-1-processed-gene-504.23-mRNA-1 | Japonica | NA       |           | Os01g0968800 | OsR498G0102764300.01.T01 | Dehydration-responsive element-binding protein 1D                      |
| augustus-1-processed-gene-506.28-mRNA-1 | Japonica | NA       |           | Os01g0972000 | OsR498G0102775500.01.T01 | RING-type E3 ubiquitin transferase                                     |
| augustus-1-processed-gene-507.75-mRNA-1 | Japonica | Japonica |           | Os01g0974900 | OsR498G0204247700.01.T03 | 26S proteasome non-ATPase regulatory subunit 6                         |
| augustus-1-processed-gene-508.13-mRNA-1 | Japonica | NA       |           | Os01g0976300 |                          | Protein SODIUM POTASSIUM ROOT DEFECTIVE 1                              |
| augustus-1-processed-gene-508.32-mRNA-1 | Japonica | NA       |           |              |                          | Retrotransposon protein, putative, unclassified, expressed             |
| augustus-1-processed-gene-509.40-mRNA-1 | Japonica | NA       |           |              | OsR498G0102792700.01.T01 | Extra-large GTP-binding protein 3                                      |
| augustus-1-processed-gene-509.44-mRNA-1 | Japonica | NA       |           | Os01g0978400 |                          | Cinnamoyl-CoA reductase                                                |
| augustus-1-processed-gene-52.11-mRNA-1  | Japonica | NA       |           | Os01g0196600 | OsR498G0100340100.01.T01 | Venom phosphodiesterase 1                                              |
| augustus-1-processed-gene-53.40-mRNA-1  | Japonica | NA       |           | Os01g0197350 | OsR498G0100343500.01.T03 |                                                                        |
| augustus-1-processed-gene-57.25-mRNA-1  | Japonica | Japonica |           | Os01g0203400 | OsR498G0100368300.01.T01 |                                                                        |
| augustus-1-processed-gene-6.45-mRNA-1   | Japonica | NA       |           | Os01g0109500 | OsR498G0100031500.01.T03 |                                                                        |
| augustus-1-processed-gene-63.39-mRNA-1  | Japonica | NA       |           |              | OsR498G0100414300.01.T01 | GDSL esterase/lipase                                                   |
| augustus-1-processed-gene-66.29-mRNA-1  | Japonica | NA       |           | Os01g0219300 | OsR498G0100429300.01.T01 |                                                                        |
| augustus-1-processed-gene-66.31-mRNA-1  | Japonica | NA       |           |              |                          | Transposable element protein, putative, MuDR                           |
| augustus-1-processed-gene-68.14-mRNA-1  | Japonica | NA       | Kinase-TM | Os01g0223900 | OsR498G0100448100.01.T01 | Non-specific serine/threonine protein kinase (Fragment)                |
| augustus-1-processed-gene-68.16-mRNA-1  | Japonica | NA       |           | Os01g0224100 | OsR498G0100451500.01.T01 | Ethylene-responsive transcription factor CRF2                          |
| augustus-1-processed-gene-70.29-mRNA-1  | Japonica | NA       |           |              | OsR498G0100464900.01.T01 | Transcription repressor                                                |
| augustus-1-processed-gene-72.51-mRNA-1  | Japonica | NA       |           | Os01g0229300 | OsR498G0100474900.01.T01 |                                                                        |

|                                          |          |          |               |              |                          |                                                             |
|------------------------------------------|----------|----------|---------------|--------------|--------------------------|-------------------------------------------------------------|
| augustus-1-processed-gene-73.17-mRNA-1   | Japonica | NA       | Kinase        | Os01g0231500 | OsR498G0100481100.01.T06 | Casein kinase (Serine/threonine/tyrosine protein kinase)    |
| augustus-1-processed-gene-73.19-mRNA-1   | Japonica | NA       |               | Os01g0231800 | OsR498G0100481700.01.T05 | Putative RNA ligase/cyclic nucleotide phosphodiesterase     |
| augustus-1-processed-gene-74.23-mRNA-1   | Japonica | NA       |               | Os01g0233100 |                          | Cyclin N-terminal domain-containing protein (Fragment)      |
| augustus-1-processed-gene-75.1-mRNA-1    | Japonica | Japonica |               | Os01g0234300 | OsR498G0100490700.01.T01 | Pectinesterase                                              |
| augustus-1-processed-gene-75.18-mRNA-1   | Japonica | Japonica |               | Os01g0235500 | OsR498G0100494900.01.T01 |                                                             |
| augustus-1-processed-gene-75.2-mRNA-1    | Japonica | NA       |               | Os01g0234300 | OsR498G0100490700.01.T01 | Pectinesterase                                              |
| augustus-1-processed-gene-75.20-mRNA-1   | Japonica | NA       |               | Os01g0235900 | OsR498G0100497300.01.T01 | Glutaredoxin domain-containing cysteine-rich protein 1      |
| augustus-1-processed-gene-75.21-mRNA-1   | Japonica | NA       |               | Os01g0236000 | OsR498G0100497500.01.T02 | Phytolongin Phyl1.1                                         |
| augustus-1-processed-gene-77.55-mRNA-1   | Japonica | NA       |               | Os01g0239100 | OsR498G0100510100.01.T01 | Heat-shock protein DnaJ                                     |
| augustus-1-processed-gene-78.1-mRNA-1    | Japonica | NA       | Kinase-LRR-TM | Os01g0239700 | OsR498G0100512300.01.T01 | Receptor-like protein kinase HSL1                           |
| augustus-1-processed-gene-94.11-mRNA-1   | Japonica | NA       |               | Os01g0270700 | OsR498G0100633700.01.T01 | Inositol or phosphatidylinositol kinase                     |
| augustus-1-processed-gene-95.16-mRNA-1   | Japonica | NA       |               | Os01g0273300 | OsR498G0100640100.01.T01 | BSD domain-containing protein 1                             |
| augustus-1-processed-gene-96.22-mRNA-1   | Japonica | NA       |               | Os01g0274500 | OsR498G0100644500.01.T01 | Expansin                                                    |
| augustus-1-processed-gene-97.6-mRNA-1    | Japonica | NA       |               |              | OsR498G0100650800.01.T02 | ArgoN domain-containing protein                             |
| augustus-1-processed-gene-98.12-mRNA-1   | Japonica | NA       |               | Os01g0277500 | OsR498G0100658300.01.T01 | Dof-type domain-containing protein                          |
| augustus-10-processed-gene-104.20-mRNA-1 | Japonica | Indica   |               | Os10g0428500 | OsR498G0108762300.01.T01 | BTB/POZ domain containing protein, expressed                |
| augustus-10-processed-gene-105.59-mRNA-1 | Japonica | NA       |               |              | OsR498G0612113800.01.T01 | RNase H domain-containing protein (Fragment)                |
| augustus-10-processed-gene-105.63-mRNA-1 | Japonica | NA       |               |              | OsR498G0204046800.01.T01 | Circumsporozoite protein-like                               |
| augustus-10-processed-gene-105.68-mRNA-1 | Japonica | NA       |               | Os10g0430950 | OsR498G0108764700.01.T01 |                                                             |
| augustus-10-processed-gene-106.25-mRNA-1 | Japonica | NA       |               |              | OsR498G0108767100.01.T01 | Transcription repressor                                     |
| augustus-10-processed-gene-107.3-mRNA-1  | Japonica | Indica   |               | Os10g0435400 | OsR498G0108774700.01.T01 | BTB/POZ domain containing protein                           |
| augustus-10-processed-gene-108.15-mRNA-1 | Japonica | Indica   |               | Os03g0748500 | OsR498G0108781100.01.T02 | NAD(P)H dehydrogenase (quinone)                             |
| augustus-10-processed-gene-108.16-mRNA-1 | Japonica | NA       |               |              | OsR498G0108781300.01.T01 | NAD(P)H dehydrogenase (quinone)                             |
| augustus-10-processed-gene-108.17-mRNA-1 | Japonica | NA       |               | Os10g0436900 | OsR498G0108781700.01.T01 | Cationcalcium exchanger 1                                   |
| augustus-10-processed-gene-108.19-mRNA-1 | Japonica | NA       |               |              | OsR498G0108783900.01.T01 | Retrotroposon protein, putative, unclassified               |
| augustus-10-processed-gene-109.50-mRNA-1 | Japonica | NA       |               | Os10g0438800 | OsR498G0108789500.01.T01 | RING finger protein 165                                     |
| augustus-10-processed-gene-111.2-mRNA-1  | Japonica | NA       | Kinase-TM     | Os10g0442000 | OsR498G0108798100.01.T01 | Putative receptor-type protein kinase LRK1                  |
| augustus-10-processed-gene-113.19-mRNA-1 | Japonica | NA       |               |              | OsR498G0108812900.01.T01 | ARID domain-containing protein                              |
| augustus-10-processed-gene-116.20-mRNA-1 | Japonica | NA       |               | Os04g0165900 |                          | Cysteine-rich receptor-like protein kinase 41               |
| augustus-10-processed-gene-118.10-mRNA-1 | Japonica | NA       |               | Os04g0162600 | OsR498G0407598800.01.T01 | DUF295 domain-containing protein (Fragment)                 |
| augustus-10-processed-gene-134.27-mRNA-1 | Japonica | NA       |               | Os04g0129900 | OsR498G0407509800.01.T01 | Dynamin family protein, putative, expressed                 |
| augustus-10-processed-gene-139.47-mRNA-1 | Japonica | NA       |               | Os04g0118900 | OsR498G0407487200.01.T03 | Serine/arginine-rich splicing factor like                   |
| augustus-10-processed-gene-15.21-mRNA-1  | Japonica | NA       |               |              |                          |                                                             |
| augustus-10-processed-gene-153.26-mRNA-1 | Japonica | NA       |               |              | OsR498G0108823300.01.T01 |                                                             |
| augustus-10-processed-gene-153.3-mRNA-1  | Japonica | NA       |               |              | OsR498G0917193500.01.T01 |                                                             |
| augustus-10-processed-gene-155.0-mRNA-1  | Japonica | NA       |               |              | OsR498G0108826300.01.T01 | RRM domain-containing protein (Fragment)                    |
| augustus-10-processed-gene-156.21-mRNA-1 | Japonica | NA       |               |              | OsR498G0108831700.01.T01 | Eukaryotic translation initiation factor 4 gamma 2 putative |
| augustus-10-processed-gene-157.44-mRNA-1 | Japonica | NA       |               |              | OsR498G0108836700.01.T01 | Enhanced disease resistance 2 isoform 1                     |
| augustus-10-processed-gene-157.47-mRNA-1 | Japonica | NA       |               | Os10g0456400 | OsR498G0108837500.01.T01 | Calcium ion binding                                         |
| augustus-10-processed-gene-16.14-mRNA-1  | Japonica | NA       |               |              |                          | Transposase, putative, expressed                            |
| augustus-10-processed-gene-168.11-mRNA-1 | Japonica | NA       |               | Os10g0475900 | OsR498G0108898300.01.T01 | Polyubiquitin-like                                          |
| augustus-10-processed-gene-168.12-mRNA-1 | Japonica | NA       |               | Os10g0476000 | OsR498G0108898500.01.T03 | Non-intrinsic ABC protein 4                                 |
| augustus-10-processed-gene-172.0-mRNA-1  | Japonica | Indica   |               | Os10g0479900 | OsR498G0108914700.01.T01 | Auxin response factor                                       |
| augustus-10-processed-gene-172.5-mRNA-1  | Japonica | Indica   |               | Os07g0693100 | OsR498G0108918700.01.T01 | Pyruvate decarboxylase                                      |
| augustus-10-processed-gene-173.21-mRNA-1 | Japonica | NA       |               |              | OsR498G0108930300.01.T01 | RNase H domain-containing protein (Fragment)                |
| augustus-10-processed-gene-175.49-mRNA-1 | Japonica | NA       |               |              |                          | Tetratricopeptide repeat protein 1                          |
| augustus-10-processed-gene-176.14-mRNA-1 | Japonica | NA       |               |              | OsR498G0108947100.01.T05 | SMAP domain-containing protein (Fragment)                   |
| augustus-10-processed-gene-177.26-mRNA-1 | Japonica | Indica   |               | Os10g0488900 | OsR498G0108950500.01.T02 | Pentatricopeptide repeat-containing protein chloroplastic   |
| augustus-10-processed-gene-178.18-mRNA-1 | Japonica | NA       | Kinase-LRR-TM |              | OsR498G0108962700.01.T01 | Tyrosine-protein kinase                                     |
| augustus-10-processed-gene-179.42-mRNA-1 | Japonica | NA       |               | Os10g0493600 | OsR498G0108966500.01.T04 | Alpha-galactosidase                                         |
| augustus-10-processed-gene-18.26-mRNA-1  | Japonica | NA       |               | Os10g0124500 |                          | F-box domain containing protein, expressed                  |
| augustus-10-processed-gene-181.75-mRNA-1 | Japonica | NA       |               | Os10g0495000 | OsR498G0108975500.01.T02 | KH domain containing protein, expressed                     |
| augustus-10-processed-gene-182.45-mRNA-1 | Japonica | NA       |               | Os10g0498500 | OsR498G0108987100.01.T01 | AB hydrolase superfamily protein yfhM                       |
| augustus-10-processed-gene-182.57-mRNA-1 | Japonica | NA       |               |              | OsR498G0108988900.01.T01 |                                                             |
| augustus-10-processed-gene-182.59-mRNA-1 | Japonica | NA       |               | Os10g0499500 | OsR498G0108991500.01.T01 | Rf1 protein, mitochondrial, putative, expressed             |
| augustus-10-processed-gene-182.61-mRNA-1 | Japonica | Japonica |               | Os10g0499800 | OsR498G0108978200.01.T01 | Rf1 protein, mitochondrial, putative, expressed             |
| augustus-10-processed-gene-183.9-mRNA-1  | Japonica | NA       |               | Os10g0502100 | OsR498G0108999100.01.T01 | Putative alkaline/neutral invertase F                       |
| augustus-10-processed-gene-184.39-mRNA-1 | Japonica | NA       |               | Os10g0503200 | OsR498G0109001800.01.T04 | Folypoly-gamma-glutamate synthetase                         |
| augustus-10-processed-gene-185.13-mRNA-1 | Japonica | Japonica |               | Os10g0506000 | OsR498G0109008700.01.T01 | Pentatricopeptide repeat                                    |
| augustus-10-processed-gene-185.16-mRNA-1 | Japonica | NA       |               | Os04g0384000 |                          |                                                             |
| augustus-10-processed-gene-186.1-mRNA-1  | Japonica | Japonica |               | Os10g0507500 | OsR498G0109011500.01.T02 | leukocyte receptor cluster member 1                         |

|                                          |          |          |            |              |                          |                                                                     |
|------------------------------------------|----------|----------|------------|--------------|--------------------------|---------------------------------------------------------------------|
| augustus-10-processed-gene-186.15-mRNA-1 | Japonica | NA       |            | Os10g0508100 | OsR498G1019014300.01.T02 | IRK-interacting protein-like                                        |
| augustus-10-processed-gene-188.30-mRNA-1 | Japonica | NA       |            | Os10g0510400 | OsR498G1019023100.01.T04 | Methyltransferase                                                   |
| augustus-10-processed-gene-188.39-mRNA-1 | Japonica | NA       |            | Os10g0511400 | OsR498G1019027100.01.T02 | Prolyl carboxypeptidase like protein, putative, expressed           |
| augustus-10-processed-gene-189.23-mRNA-1 | Japonica | NA       |            | Os10g0513300 | OsR498G1019032900.01.T03 | Ubiquinone biosynthesis protein COQ4-like, mitochondrial (Fragment) |
| augustus-10-processed-gene-189.24-mRNA-1 | Japonica | Indica   |            | Os10g0513550 | OsR498G1019033100.01.T01 | Cytochrome P450 family 87 subfamily A polypeptide 6                 |
| augustus-10-processed-gene-190.0-mRNA-1  | Japonica | Japonica |            | Os10g0513900 | OsR498G1019033100.01.T01 | Cytochrome P450 family 87 subfamily A polypeptide 6                 |
| augustus-10-processed-gene-190.2-mRNA-1  | Japonica | Indica   |            | Os10g0513900 | OsR498G1019033500.01.T01 | Cytochrome P450 family 87 subfamily A polypeptide 6                 |
| augustus-10-processed-gene-190.27-mRNA-1 | Japonica | NA       |            | Os10g0515200 | OsR498G1019034900.01.T01 | Cytochrome P450 family 87 subfamily A polypeptide 6                 |
| augustus-10-processed-gene-190.3-mRNA-1  | Japonica | Indica   |            | Os10g0513900 | OsR498G1019033500.01.T01 | Cytochrome P450 family 87 subfamily A polypeptide 6                 |
| augustus-10-processed-gene-190.30-mRNA-1 | Japonica | NA       |            | Os10g0515900 | OsR498G1019035500.01.T01 | Cytochrome P450 family 87 subfamily A polypeptide 6                 |
| augustus-10-processed-gene-190.4-mRNA-1  | Japonica | NA       |            | Os10g0514400 |                          |                                                                     |
| augustus-10-processed-gene-192.22-mRNA-1 | Japonica | NA       |            | Os10g0519800 | OsR498G1019053500.01.T01 | DUF295 domain-containing protein                                    |
| augustus-10-processed-gene-193.32-mRNA-1 | Japonica | Japonica |            | Os10g0520100 | OsR498G1019053700.01.T01 | DUF295 domain-containing protein                                    |
| augustus-10-processed-gene-193.33-mRNA-1 | Japonica | Japonica |            | Os10g0520400 | OsR498G1019054500.01.T01 | DUF295 domain-containing protein                                    |
| augustus-10-processed-gene-195.38-mRNA-1 | Japonica | NA       |            | Os10g0524300 | OsR498G1019069700.01.T01 | Peptidoglycan-binding LysM domain-containing protein, putative      |
| augustus-10-processed-gene-20.32-mRNA-1  | Japonica | NA       |            | Os10g0128400 | OsR498G1018085500.01.T04 |                                                                     |
| augustus-10-processed-gene-21.31-mRNA-1  | Japonica | Japonica |            | Os10g0130200 | OsR498G0203391400.01.T01 | F-box domain containing protein, expressed                          |
| augustus-10-processed-gene-22.0-mRNA-1   | Japonica | Japonica |            | Os10g0131000 | OsR498G1018101100.01.T01 | Disease resistance protein RPM1                                     |
| augustus-10-processed-gene-23.0-mRNA-1   | Japonica | NA       |            | Os01g0726700 | OsR498G0101927700.01.T01 | Protodermal factor 1                                                |
| augustus-10-processed-gene-23.14-mRNA-1  | Japonica | Indica   |            | Os10g0133500 | OsR498G1018102300.01.T01 | Benzyl alcohol O-benzoyltransferase                                 |
| augustus-10-processed-gene-24.12-mRNA-1  | Japonica | Indica   |            | Os10g0134400 | OsR498G1018104100.01.T01 |                                                                     |
| augustus-10-processed-gene-24.14-mRNA-1  | Japonica | Japonica |            | Os10g0134700 | OsR498G1018104900.01.T01 | F-box domain-containing protein                                     |
| augustus-10-processed-gene-24.15-mRNA-1  | Japonica | Indica   |            | Os10g0135100 | OsR498G1018105500.01.T01 | Putative disease resistance protein RGA4                            |
| augustus-10-processed-gene-24.16-mRNA-1  | Japonica | Indica   |            | Os10g0135100 | OsR498G1018105900.01.T01 | NB-ARC domain containing protein                                    |
| augustus-10-processed-gene-24.19-mRNA-1  | Japonica | Japonica |            | Os10g0135300 | OsR498G1018107100.01.T03 | F-box domain containing protein, expressed                          |
| augustus-10-processed-gene-25.0-mRNA-1   | Japonica | NA       |            | Os10g0135400 | OsR498G1018107700.01.T05 | F-box domain containing protein, expressed                          |
| augustus-10-processed-gene-25.2-mRNA-1   | Japonica | NA       |            | Os10g0135600 | OsR498G1018108500.01.T01 | caffeoylshikimate esterase                                          |
| augustus-10-processed-gene-26.10-mRNA-1  | Japonica | NA       |            | Os10g0137100 |                          |                                                                     |
| augustus-10-processed-gene-34.19-mRNA-1  | Japonica | NA       |            | Os10g0150200 | OsR498G1018151700.01.T01 | IGR protein motif                                                   |
| augustus-10-processed-gene-35.7-mRNA-1   | Japonica | Indica   | Kinase-TM  | Os10g0151100 | OsR498G1018156300.01.T01 | Wall associated kinase                                              |
| augustus-10-processed-gene-44.0-mRNA-1   | Japonica | NA       | LRR-NBS-TM |              | OsR498G1018206100.01.T04 | NB-ARC domain containing protein, expressed                         |
| augustus-10-processed-gene-45.26-mRNA-1  | Japonica | NA       |            | Os05g0527100 | OsR498G0511219800.01.T01 | Glycosyltransferase                                                 |
| augustus-10-processed-gene-46.22-mRNA-1  | Japonica | Indica   |            | Os10g0163201 | OsR498G1018228800.01.T01 | Lecithin-cholesterol acyltransferase-like 1                         |
| augustus-10-processed-gene-58.33-mRNA-1  | Japonica | NA       |            | Os11g0205200 | OsR498G0101869200.01.T01 | Putative copia-type pol polyprotein                                 |
| augustus-10-processed-gene-59.16-mRNA-1  | Japonica | NA       |            |              |                          |                                                                     |
| augustus-10-processed-gene-77.12-mRNA-1  | Japonica | Indica   |            | Os03g0845100 | OsR498G1018361500.01.T01 | Transposable element protein, putative, MuDR                        |
| augustus-10-processed-gene-94.21-mRNA-1  | Japonica | Indica   |            | Os05g0267732 | OsR498G1018411500.01.T01 |                                                                     |
| augustus-11-processed-gene-1.13-mRNA-1   | Japonica | Japonica |            | Os11g0119200 | OsR498G1220832400.01.T01 | RING-type E3 ubiquitin transferase                                  |
| augustus-11-processed-gene-100.22-mRNA-1 | Japonica | NA       |            |              |                          | Transposon protein, putative, mutator sub-class                     |
| augustus-11-processed-gene-11.17-mRNA-1  | Japonica | NA       |            | Os11g0138700 | OsR498G1119390700.01.T01 | Kelch motif family protein, expressed                               |
| augustus-11-processed-gene-11.19-mRNA-1  | Japonica | NA       |            | Os11g0138900 | OsR498G1119391100.01.T01 | Cell death associated protein, putative, expressed                  |
| augustus-11-processed-gene-11.2-mRNA-1   | Japonica | NA       |            |              | OsR498G1119385200.01.T01 | putative RING-H2 finger protein ATL61                               |
| augustus-11-processed-gene-11.20-mRNA-1  | Japonica | NA       |            | Os11g0139000 | OsR498G1119391300.01.T01 | Cell death associated protein, putative, expressed                  |
| augustus-11-processed-gene-11.22-mRNA-1  | Japonica | NA       |            | Os11g0139400 | OsR498G1119391900.01.T01 | TPT domain-containing protein                                       |
| augustus-11-processed-gene-11.3-mRNA-1   | Japonica | NA       |            | Os11g0138300 | OsR498G1119389500.01.T01 | Putative cytochrome P450-dependent fatty acid hydroxylase           |
| augustus-11-processed-gene-110.13-mRNA-1 | Japonica | NA       |            | Os11g0427700 | OsR498G1119995500.01.T01 | Adenineguanine permease azg2                                        |
| augustus-11-processed-gene-110.14-mRNA-1 | Japonica | NA       |            | Os11g0427800 | OsR498G1119996500.01.T01 | Non-specific lipid-transfer protein (Fragment)                      |
| augustus-11-processed-gene-111.16-mRNA-1 | Japonica | NA       |            |              | OsR498G0407753100.01.T01 | HGWP repeat containing protein-like                                 |
| augustus-11-processed-gene-113.23-mRNA-1 | Japonica | NA       |            |              | OsR498G1120012500.01.T01 |                                                                     |
| augustus-11-processed-gene-113.24-mRNA-1 | Japonica | NA       |            | Os11g0432400 | OsR498G1120014500.01.T02 | Mitochondrial dicarboxylatetricarboxylate transporter dtc           |
| augustus-11-processed-gene-113.27-mRNA-1 | Japonica | NA       |            | Os11g0433100 | OsR498G1120016500.01.T01 | Pentatricopeptide repeat-containing protein mitochondrial           |
| augustus-11-processed-gene-114.1-mRNA-1  | Japonica | NA       |            | Os11g0433300 |                          | BTB domain-containing protein (Fragment)                            |
| augustus-11-processed-gene-114.4-mRNA-1  | Japonica | Indica   |            | Os11g0433600 | OsR498G1120018500.01.T01 | Pentatricopeptide repeat-containing protein, mitochondrial          |
| augustus-11-processed-gene-116.16-mRNA-1 | Japonica | NA       |            |              | OsR498G1120023700.01.T01 | BHLH domain-containing protein                                      |
| augustus-11-processed-gene-116.17-mRNA-1 | Japonica | NA       |            |              |                          |                                                                     |
| augustus-11-processed-gene-119.2-mRNA-1  | Japonica | NA       | Kinase-TM  | Os11g0441900 | OsR498G1120029400.01.T01 | G-type lectin S-receptor-like serine/threonine-protein kinase       |
| augustus-11-processed-gene-12.14-mRNA-1  | Japonica | NA       |            |              | OsR498G0511427100.01.T01 | Epstein-Barr virus EBNA-1-like                                      |
| augustus-11-processed-gene-121.11-mRNA-1 | Japonica | NA       | Kinase-TM  | Os11g0445300 | OsR498G1120050700.01.T01 | Brassinosteroid insensitive 1-associated receptor kinase 1          |
| augustus-11-processed-gene-123.17-mRNA-1 | Japonica | NA       |            |              | OsR498G1120061700.01.T01 |                                                                     |
| augustus-11-processed-gene-129.11-mRNA-1 | Japonica | NA       |            |              | OsR498G1120090300.01.T01 | MATH domain-containing protein                                      |
| augustus-11-processed-gene-13.26-mRNA-1  | Japonica | Indica   |            | Os11g0142300 | OsR498G1220908700.01.T01 | Strictosidine synthase                                              |



|                                          |          |          |               |              |                          |                                                                  |
|------------------------------------------|----------|----------|---------------|--------------|--------------------------|------------------------------------------------------------------|
| augustus-11-processed-gene-13.44-mRNA-1  | Japonica | NA       |               |              | OsR498G1119403900.01.T01 |                                                                  |
| augustus-11-processed-gene-13.45-mRNA-1  | Japonica | NA       |               | Os12g0140200 | OsR498G1220912300.01.T01 | Regulator of gene silencing                                      |
| augustus-11-processed-gene-13.53-mRNA-1  | Japonica | NA       |               | Os11g0144900 | OsR498G1119405700.01.T01 | Embryogenesis transmembrane protein-like                         |
| augustus-11-processed-gene-130.0-mRNA-1  | Japonica | NA       |               | Os11g0459300 | OsR498G1120090900.01.T01 |                                                                  |
| augustus-11-processed-gene-130.11-mRNA-1 | Japonica | NA       |               |              |                          | Pentatricopeptide, putative, expressed                           |
| augustus-11-processed-gene-131.15-mRNA-1 | Japonica | Indica   |               | Os12g0575000 | OsR498G1120094300.01.T01 | Endopolylgalacturonase AN8327 (Fragment)                         |
| augustus-11-processed-gene-131.26-mRNA-1 | Japonica | Indica   |               | Os11g0457300 | OsR498G1120095300.01.T01 | Transposon protein, putative, Mariner sub-class, expressed       |
| augustus-11-processed-gene-131.27-mRNA-1 | Japonica | NA       |               | Os11g0462100 | OsR498G1120097100.01.T01 | class V chitinase-like                                           |
| augustus-11-processed-gene-133.6-mRNA-1  | Japonica | Indica   |               | Os11g0180000 | OsR498G1120104500.01.T01 | Dirigent protein (Fragment)                                      |
| augustus-11-processed-gene-135.10-mRNA-1 | Japonica | NA       |               |              | OsR498G1120114700.01.T01 |                                                                  |
| augustus-11-processed-gene-137.11-mRNA-1 | Japonica | NA       |               | Os11g0473000 | OsR498G1120125900.01.T01 | ER lumen protein-retaining receptor                              |
| augustus-11-processed-gene-14.0-mRNA-1   | Japonica | Indica   |               | Os12g0143150 | OsR498G1119406500.01.T02 | Ubiquitin-like protein 5                                         |
| augustus-11-processed-gene-14.2-mRNA-1   | Japonica | NA       |               | Os11g0145600 |                          | SPRY domain-containing protein                                   |
| augustus-11-processed-gene-14.24-mRNA-1  | Japonica | Indica   |               | Os12g0143750 | OsR498G1119407500.01.T01 | E3 ubiquitin-protein ligase rnf12-B                              |
| augustus-11-processed-gene-144.6-mRNA-1  | Japonica | NA       |               | Os11g0482400 | OsR498G1120148300.01.T01 | Pentatricopeptide repeat-containing protein chloroplastic        |
| augustus-11-processed-gene-144.9-mRNA-1  | Japonica | NA       |               | Os11g0483000 |                          | Cytochrome P450 family 96 subfamily A polypeptide 1              |
| augustus-11-processed-gene-145.40-mRNA-1 | Japonica | NA       |               | Os11g0484500 | OsR498G1120152900.01.T01 | 6-phosphogluconate dehydrogenase, decarboxylating                |
| augustus-11-processed-gene-146.14-mRNA-1 | Japonica | NA       |               |              | OsR498G1120155900.01.T01 |                                                                  |
| augustus-11-processed-gene-146.15-mRNA-1 | Japonica | NA       |               | Os11g0487700 |                          |                                                                  |
| augustus-11-processed-gene-154.13-mRNA-1 | Japonica | NA       |               |              | OsR498G1120197300.01.T02 |                                                                  |
| augustus-11-processed-gene-154.17-mRNA-1 | Japonica | Indica   |               | Os11g0505200 | OsR498G1120198900.01.T01 | Sulfotransferase                                                 |
| augustus-11-processed-gene-155.4-mRNA-1  | Japonica | NA       |               | Os11g0505200 | OsR498G1120199500.01.T01 | Sulfotransferase                                                 |
| augustus-11-processed-gene-157.0-mRNA-1  | Japonica | NA       |               | Os07g0513300 |                          | Transposon protein, putative, Mutator sub-class, expressed       |
| augustus-11-processed-gene-157.14-mRNA-1 | Japonica | NA       |               |              | OsR498G0408287200.01.T01 | RNase H domain-containing protein                                |
| augustus-11-processed-gene-158.17-mRNA-1 | Japonica | Indica   |               | Os11g0512200 | OsR498G1120212500.01.T01 | No apical meristem protein, expressed                            |
| augustus-11-processed-gene-159.48-mRNA-1 | Japonica | NA       |               | Os12g0550700 |                          | Transposon protein, putative, Pong sub-class, expressed          |
| augustus-11-processed-gene-16.32-mRNA-1  | Japonica | NA       |               |              |                          | Transposon protein, putative, Mutator sub-class, expressed       |
| augustus-11-processed-gene-16.33-mRNA-1  | Japonica | NA       |               |              | OsR498G1119418900.01.T01 | Zinc finger, C3HC4 type family protein, expressed                |
| augustus-11-processed-gene-16.34-mRNA-1  | Japonica | NA       |               | Os11g0149900 | OsR498G1119419500.01.T01 | PAN domain-containing protein                                    |
| augustus-11-processed-gene-16.36-mRNA-1  | Japonica | NA       |               | Os03g0793100 | OsR498G0307191800.01.T02 | Glycosyltransferases                                             |
| augustus-11-processed-gene-165.25-mRNA-1 | Japonica | NA       |               | Os11g0525200 | OsR498G1120251900.01.T01 | Obtusifoliol 14-alpha demethylase                                |
| augustus-11-processed-gene-166.38-mRNA-1 | Japonica | NA       |               | Os11g0527000 |                          |                                                                  |
| augustus-11-processed-gene-169.13-mRNA-1 | Japonica | NA       |               | Os11g0531900 | OsR498G1120275200.01.T01 |                                                                  |
| augustus-11-processed-gene-169.14-mRNA-1 | Japonica | NA       |               | Os11g0533500 | OsR498G1120278500.01.T06 | Retinoblastoma-related protein 2                                 |
| augustus-11-processed-gene-169.15-mRNA-1 | Japonica | NA       |               |              | OsR498G1120279100.01.T01 |                                                                  |
| augustus-11-processed-gene-17.15-mRNA-1  | Japonica | Indica   |               | Os12g0151000 | OsR498G1119427900.01.T01 | Purple acid phosphatase                                          |
| augustus-11-processed-gene-17.18-mRNA-1  | Japonica | NA       |               |              | OsR498G1119429500.01.T01 | DUF295 domain-containing protein                                 |
| augustus-11-processed-gene-170.12-mRNA-1 | Japonica | NA       |               | Os11g0535600 | OsR498G1120283900.01.T04 | C2 domain containing protein, expressed                          |
| augustus-11-processed-gene-171.26-mRNA-1 | Japonica | NA       |               | Os11g0537300 | OsR498G1120288100.01.T01 | Germin-like protein 11-1                                         |
| augustus-11-processed-gene-171.32-mRNA-1 | Japonica | NA       |               |              | OsR498G1120288600.01.T01 | Respiratory burst oxidase like protein C                         |
| augustus-11-processed-gene-171.36-mRNA-1 | Japonica | NA       |               | Os11g0538400 |                          | FBD domain-containing protein                                    |
| augustus-11-processed-gene-171.37-mRNA-1 | Japonica | Japonica |               | Os11g0538600 | OsR498G1120290900.01.T01 | FBD domain-containing protein                                    |
| augustus-11-processed-gene-173.1-mRNA-1  | Japonica | NA       |               | Os11g0540900 | OsR498G1120300300.01.T01 |                                                                  |
| augustus-11-processed-gene-173.2-mRNA-1  | Japonica | Indica   |               | Os11g0541600 | OsR498G1120301100.01.T01 |                                                                  |
| augustus-11-processed-gene-175.0-mRNA-1  | Japonica | Indica   |               | Os11g0544000 | OsR498G1120311700.01.T06 | Pentatricopeptide repeat superfamily protein, putative isoform 1 |
| augustus-11-processed-gene-178.46-mRNA-1 | Japonica | NA       |               | Os11g0549635 | OsR498G1120330300.01.T02 | ABC1 domain-containing protein (Fragment)                        |
| augustus-11-processed-gene-180.33-mRNA-1 | Japonica | Japonica | CC-LRR-NBS-TM | Os11g0551300 | OsR498G1120334900.01.T01 | Disease resistance protein RPM1                                  |
| augustus-11-processed-gene-181.0-mRNA-1  | Japonica | NA       |               |              | OsR498G0509784600.01.T01 | SANT domain-containing protein                                   |
| augustus-11-processed-gene-182.37-mRNA-1 | Japonica | NA       | Kinase-TM     | Os11g0557500 | OsR498G1120348700.01.T01 | Proline-rich receptor-like protein kinase PERK14                 |
| augustus-11-processed-gene-182.41-mRNA-1 | Japonica | NA       |               | Os11g0558300 | OsR498G1120351100.01.T01 | AMP-binding enzyme family protein, expressed                     |
| augustus-11-processed-gene-184.34-mRNA-1 | Japonica | NA       |               | Os11g0562100 | OsR498G1120361100.01.T02 | Terpene cyclase/mutase family member                             |
| augustus-11-processed-gene-185.22-mRNA-1 | Japonica | NA       | LRR-TM        | Os11g0565000 | OsR498G1120370300.01.T01 | Leucine Rich Repeat family protein, expressed                    |
| augustus-11-processed-gene-187.24-mRNA-1 | Japonica | NA       |               | Os11g0568500 | OsR498G1120379500.01.T02 | Prefoldin subunit                                                |
| augustus-11-processed-gene-189.16-mRNA-1 | Japonica | NA       |               | Os11g0571900 | OsR498G1120390900.01.T01 | TPX2 domain-containing protein (Fragment)                        |
| augustus-11-processed-gene-19.24-mRNA-1  | Japonica | NA       |               | Os11g0156300 | OsR498G1119444100.01.T01 | Transcription repressor                                          |
| augustus-11-processed-gene-193.13-mRNA-1 | Japonica | Japonica |               | Os11g0577800 | OsR498G0307190300.01.T02 | Glucan endo-1,3-beta-D-glucosidase                               |
| augustus-11-processed-gene-193.14-mRNA-1 | Japonica | Indica   |               | Os03g0804800 | OsR498G1120402700.01.T01 | CCT-theta                                                        |
| augustus-11-processed-gene-193.22-mRNA-1 | Japonica | NA       |               | Os11g0578100 | OsR498G1120403100.01.T01 | J domain-containing protein (Fragment)                           |
| augustus-11-processed-gene-193.30-mRNA-1 | Japonica | NA       |               | Os11g0578700 | OsR498G1120405100.01.T01 | F-box only protein 7                                             |
| augustus-11-processed-gene-194.1-mRNA-1  | Japonica | Japonica |               | Os11g0579600 | OsR498G1120405500.01.T01 | F-box domain containing protein, expressed                       |
| augustus-11-processed-gene-196.0-mRNA-1  | Japonica | NA       |               | Os11g0584100 | OsR498G1120415500.01.T01 | F-box only protein 7                                             |

|                                          |          |          |            |              |                          |                                                               |
|------------------------------------------|----------|----------|------------|--------------|--------------------------|---------------------------------------------------------------|
| augustus-11-processed-gene-197.15-mRNA-1 | Japonica | NA       |            | Os11g0586900 | OsR498G1120421300.01.T02 | ADP-ribosylation factor-like protein 5                        |
| augustus-11-processed-gene-2.36-mRNA-1   | Japonica | NA       |            | Os11g0119700 | OsR498G1220832200.01.T01 | Secologanin synthase                                          |
| augustus-11-processed-gene-2.54-mRNA-1   | Japonica | NA       |            | Os12g0120900 | OsR498G1220825200.01.T01 | High density lipoprotein binding protein                      |
| augustus-11-processed-gene-200.40-mRNA-1 | Japonica | NA       |            | Os11g0591600 | OsR498G1120433100.01.T01 | DJ-1 protein-like protein E                                   |
| augustus-11-processed-gene-200.53-mRNA-1 | Japonica | NA       |            | Os11g0592200 | OsR498G1120434500.01.T01 | Barwin domain-containing protein                              |
| augustus-11-processed-gene-201.32-mRNA-1 | Japonica | NA       |            | Os11g0593100 | OsR498G1120437900.01.T01 | DUF295 domain-containing protein (Fragment)                   |
| augustus-11-processed-gene-201.44-mRNA-1 | Japonica | Indica   |            | Os11g0593500 | OsR498G1120438300.01.T01 | DUF295 domain-containing protein (Fragment)                   |
| augustus-11-processed-gene-201.45-mRNA-1 | Japonica | Japonica |            | Os11g0593500 | OsR498G1120439100.01.T01 | DUF295 domain-containing protein (Fragment)                   |
| augustus-11-processed-gene-201.48-mRNA-1 | Japonica | NA       |            | Os11g0594700 | OsR498G1120444100.01.T01 | F-box domain-containing protein                               |
| augustus-11-processed-gene-201.49-mRNA-1 | Japonica | NA       |            | Os11g0594800 | OsR498G1120444500.01.T01 | F-box domain-containing protein                               |
| augustus-11-processed-gene-201.50-mRNA-1 | Japonica | NA       |            | Os11g0595000 | OsR498G1120445100.01.T01 | F-box domain-containing protein                               |
| augustus-11-processed-gene-204.32-mRNA-1 | Japonica | Japonica | CC-NBS     | Os11g0598500 | OsR498G1120448400.01.T01 | Leucine Rich Repeat family protein, expressed                 |
| augustus-11-processed-gene-204.33-mRNA-1 | Japonica | NA       |            | Os04g0576300 | OsR498G0409126100.01.T01 | PUA domain-containing protein (Fragment)                      |
| augustus-11-processed-gene-205.0-mRNA-1  | Japonica | Indica   |            | Os09g0434900 | OsR498G1120456900.01.T01 | IBR domain-containing protein                                 |
| augustus-11-processed-gene-206.1-mRNA-1  | Japonica | NA       |            | Os11g0600700 | OsR498G1120466900.01.T02 | RING-CH-type domain-containing protein                        |
| augustus-11-processed-gene-206.17-mRNA-1 | Japonica | Japonica | Kinase-TM  | Os11g0601500 | OsR498G1120470500.01.T01 | Putative serine/threonine-specific protein kinase             |
| augustus-11-processed-gene-206.20-mRNA-1 | Japonica | NA       |            | Os11g0601600 | OsR498G1120470700.01.T01 | Methyltransferase                                             |
| augustus-11-processed-gene-207.20-mRNA-1 | Japonica | NA       |            | Os11g0602200 | OsR498G1120473300.01.T05 | Histone-lysine N-methyltransferase H3 lysine-9 specific SUVH3 |
| augustus-11-processed-gene-207.23-mRNA-1 | Japonica | Japonica |            | Os11g0602400 | OsR498G0612676800.01.T03 | tRNA-intron lyase                                             |
| augustus-11-processed-gene-207.24-mRNA-1 | Japonica | NA       |            | Os11g0602600 | OsR498G1120474500.01.T03 | 30S ribosomal protein S4, chloroplastic                       |
| augustus-11-processed-gene-208.16-mRNA-1 | Japonica | NA       |            |              | OsR498G1120479500.01.T01 |                                                               |
| augustus-11-processed-gene-209.35-mRNA-1 | Japonica | Japonica | NBS-TM     | Os11g0606500 | OsR498G1120485700.01.T01 | Nucleotide binding-leucine rich repeat protein                |
| augustus-11-processed-gene-209.38-mRNA-1 | Japonica | NA       |            | Os11g0607100 | OsR498G1120486300.01.T02 | Pentatricopeptide repeat-containing protein isoform A         |
| augustus-11-processed-gene-211.13-mRNA-1 | Japonica | NA       |            | Os11g0610600 | OsR498G1120490700.01.T02 | RING-H2 finger protein ATL54                                  |
| augustus-11-processed-gene-211.18-mRNA-1 | Japonica | NA       |            |              | OsR498G1120492100.01.T01 |                                                               |
| augustus-11-processed-gene-214.19-mRNA-1 | Japonica | NA       |            | Os11g0615600 | OsR498G1120508300.01.T01 |                                                               |
| augustus-11-processed-gene-215.12-mRNA-1 | Japonica | NA       |            | Os11g0616200 | OsR498G1120511100.01.T01 | Peptidylprolyl isomerase                                      |
| augustus-11-processed-gene-217.16-mRNA-1 | Japonica | NA       |            |              | OsR498G1120524700.01.T02 | Monosaccharide-sensing protein 2                              |
| augustus-11-processed-gene-217.18-mRNA-1 | Japonica | NA       |            | Os11g0620800 |                          |                                                               |
| augustus-11-processed-gene-218.12-mRNA-1 | Japonica | NA       |            | Os11g0622800 | OsR498G1120532700.01.T01 | Cinnamyl alcohol dehydrogenase                                |
| augustus-11-processed-gene-219.22-mRNA-1 | Japonica | NA       |            | Os07g0543700 | OsR498G0408675500.01.T01 |                                                               |
| augustus-11-processed-gene-219.23-mRNA-1 | Japonica | Indica   |            | Os11g0624500 | OsR498G1120542900.01.T01 | DUF295 domain-containing protein (Fragment)                   |
| augustus-11-processed-gene-22.10-mRNA-1  | Japonica | NA       |            |              | OsR498G1119463500.01.T01 | Nodulation-signaling pathway 2 protein-like                   |
| augustus-11-processed-gene-22.11-mRNA-1  | Japonica | NA       |            |              |                          | Fusarium resistance protein I2C-5-like                        |
| augustus-11-processed-gene-22.12-mRNA-1  | Japonica | NA       |            | Os11g0160800 | OsR498G1119464700.01.T01 | NB-ARC domain, putative                                       |
| augustus-11-processed-gene-22.6-mRNA-1   | Japonica | Indica   |            | Os11g0160000 | OsR498G1119460700.01.T01 |                                                               |
| augustus-11-processed-gene-22.7-mRNA-1   | Japonica | Indica   |            | Os11g0160000 | OsR498G1119461100.01.T01 |                                                               |
| augustus-11-processed-gene-22.8-mRNA-1   | Japonica | NA       |            | Os11g0160400 |                          | DD-transpeptidase                                             |
| augustus-11-processed-gene-22.9-mRNA-1   | Japonica | Indica   |            | Os11g0160500 | OsR498G1119463100.01.T01 | Transcription factor VIP1                                     |
| augustus-11-processed-gene-221.22-mRNA-1 | Japonica | NA       |            | Os06g0489700 | OsR498G0510061500.01.T01 | DUF295 domain-containing protein                              |
| augustus-11-processed-gene-221.23-mRNA-1 | Japonica | NA       |            | Os11g0628800 |                          | HAT family dimerisation domain containing protein             |
| augustus-11-processed-gene-222.14-mRNA-1 | Japonica | NA       |            | Os11g0630600 |                          | MATH domain-containing protein                                |
| augustus-11-processed-gene-223.15-mRNA-1 | Japonica | NA       |            | Os11g0631600 | OsR498G1120574300.01.T01 | MATH domain-containing protein (Fragment)                     |
| augustus-11-processed-gene-223.18-mRNA-1 | Japonica | NA       |            | Os11g0631900 |                          | Epstein-Barr virus EBNA-1-like protein                        |
| augustus-11-processed-gene-224.16-mRNA-1 | Japonica | NA       |            |              | OsR498G0917372400.01.T01 | BKRF1 encodes EBNA-1 protein-like                             |
| augustus-11-processed-gene-228.19-mRNA-1 | Japonica | Japonica | LRR-NBS-TM | Os11g0640300 | OsR498G1120612100.01.T01 | Leucine Rich Repeat family protein, expressed                 |
| augustus-11-processed-gene-228.9-mRNA-1  | Japonica | NA       |            | Os11g0639300 | OsR498G1120609300.01.T01 | DUF4220 domain-containing protein (Fragment)                  |
| augustus-11-processed-gene-23.0-mRNA-1   | Japonica | NA       |            | Os11g0161000 | OsR498G1119465100.01.T03 | NB-ARC domain, putative                                       |
| augustus-11-processed-gene-23.11-mRNA-1  | Japonica | Indica   |            | Os04g0538400 | OsR498G1119466100.01.T01 | Vacuolar iron transporter homolog 4                           |
| augustus-11-processed-gene-231.20-mRNA-1 | Japonica | NA       |            |              | OsR498G1120631500.01.T01 |                                                               |
| augustus-11-processed-gene-231.21-mRNA-1 | Japonica | Indica   | NBS-LRR    | Os11g0644700 | OsR498G1120631700.01.T01 | Disease Resistance protein Pi1 (allele at the Pik locus)      |
| augustus-11-processed-gene-235.0-mRNA-1  | Japonica | Japonica |            | Os11g0650100 | OsR498G0306323800.01.T01 |                                                               |
| augustus-11-processed-gene-235.26-mRNA-1 | Japonica | NA       | CC-NBS-TM  | Os11g0652100 | OsR498G1120654000.01.T01 | Disease resistance protein RPM1                               |
| augustus-11-processed-gene-236.18-mRNA-1 | Japonica | NA       | NBS-TM     | Os11g0654100 |                          | NB-ARC domain containing protein, expressed                   |
| augustus-11-processed-gene-237.18-mRNA-1 | Japonica | NA       | CC-NBS-TM  | Os11g0655300 | OsR498G1120667300.01.T01 | NB-ARC domain containing protein, expressed                   |
| augustus-11-processed-gene-24.1-mRNA-1   | Japonica | Japonica |            | Os11g0163500 | OsR498G1119469700.01.T03 | Trihelix transcription factor                                 |
| augustus-11-processed-gene-24.10-mRNA-1  | Japonica | NA       |            | Os11g0163800 | OsR498G1119470500.01.T01 |                                                               |
| augustus-11-processed-gene-241.31-mRNA-1 | Japonica | NA       |            |              | OsR498G1120687300.01.T02 | Auxilin-related protein 1                                     |
| augustus-11-processed-gene-245.2-mRNA-1  | Japonica | NA       |            |              | OsR498G1120693500.01.T01 |                                                               |
| augustus-11-processed-gene-246.20-mRNA-1 | Japonica | NA       |            |              | OsR498G1120697900.01.T02 | Calmodulin-binding protein-like                               |
| augustus-11-processed-gene-246.34-mRNA-1 | Japonica | NA       |            |              | OsR498G1120698700.01.T01 | Serine/threonine kinase-like                                  |

|                                          |          |          |               |              |                          |                                                                        |
|------------------------------------------|----------|----------|---------------|--------------|--------------------------|------------------------------------------------------------------------|
| augustus-11-processed-gene-246.40-mRNA-1 | Japonica | NA       |               | Os11g0670900 |                          | Phorbol-ester/DAG-type domain-containing protein                       |
| augustus-11-processed-gene-247.35-mRNA-1 | Japonica | NA       |               | Os11g0672900 | OsR498G1120706700.01.T01 | Calmodulin binding protein-like                                        |
| augustus-11-processed-gene-248.0-mRNA-1  | Japonica | NA       |               |              |                          | Transposon protein, putative, CACTA, En/Spm sub-class                  |
| augustus-11-processed-gene-25.0-mRNA-1   | Japonica | NA       |               | Os11g0166100 | OsR498G1119471900.01.T01 | F-box domain-containing protein (Fragment)                             |
| augustus-11-processed-gene-251.13-mRNA-1 | Japonica | NA       |               |              | OsR498G0612612900.01.T01 | DUF834 domain-containing protein                                       |
| augustus-11-processed-gene-252.15-mRNA-1 | Japonica | NA       |               |              | OsR498G0408884400.01.T03 | Epstein-Barr virus EBNA-1-like                                         |
| augustus-11-processed-gene-252.2-mRNA-1  | Japonica | NA       |               | Os11g0683600 |                          |                                                                        |
| augustus-11-processed-gene-261.0-mRNA-1  | Japonica | NA       |               | Os11g0701100 | OsR498G1120762300.01.T01 | Xylanase inhibitor                                                     |
| augustus-11-processed-gene-261.1-mRNA-1  | Japonica | NA       |               | Os11g0701200 | OsR498G1120762500.01.T01 | Xylanase inhibitor XIP-III                                             |
| augustus-11-processed-gene-261.18-mRNA-1 | Japonica | NA       |               | Os11g0701800 | OsR498G1120763500.01.T01 | Xylanase inhibitor                                                     |
| augustus-11-processed-gene-262.22-mRNA-1 | Japonica | NA       |               | Os11g0705200 | OsR498G1120771100.01.T01 | GRAS transcription factor                                              |
| augustus-11-processed-gene-263.49-mRNA-1 | Japonica | Indica   |               | Os11g0705200 | OsR498G1120772300.01.T01 | GRAS family transcription factor containing protein, expressed         |
| augustus-11-processed-gene-263.50-mRNA-1 | Japonica | Japonica |               | Os11g0705900 | OsR498G1120772300.01.T01 | GRAS transcription factor                                              |
| augustus-11-processed-gene-263.51-mRNA-1 | Japonica | NA       |               | Os11g0706000 |                          | GRAS transcription factor                                              |
| augustus-11-processed-gene-263.52-mRNA-1 | Japonica | NA       |               | Os11g0706200 |                          | GRAS transcription factor                                              |
| augustus-11-processed-gene-263.65-mRNA-1 | Japonica | Japonica |               | Os11g0708500 | OsR498G1120778700.01.T01 | probable pyridoxal 5'-phosphate synthase subunit PDX1                  |
| augustus-11-processed-gene-27.38-mRNA-1  | Japonica | NA       |               |              | OsR498G1119475700.01.T01 | DUF676 domain-containing protein                                       |
| augustus-11-processed-gene-27.39-mRNA-1  | Japonica | Japonica |               | Os11g0167600 | OsR498G1119475900.01.T01 | Exocyst subunit Exo70 family protein (Fragment)                        |
| augustus-11-processed-gene-29.29-mRNA-1  | Japonica | NA       |               | Os11g0171300 | OsR498G1119486400.01.T02 | Fructose-bisphosphate aldolase                                         |
| augustus-11-processed-gene-30.12-mRNA-1  | Japonica | Japonica | Kinase-LRR-TM | Os11g0172800 | OsR498G1119491700.01.T01 | Protein kinase domain-containing protein                               |
| augustus-11-processed-gene-31.0-mRNA-1   | Japonica | Indica   | Kinase-LRR-TM | Os11g0171800 | OsR498G1119492700.01.T01 | Leucine-rich repeat receptor kinase (LRR-RK)                           |
| augustus-11-processed-gene-31.11-mRNA-1  | Japonica | NA       |               |              | OsR498G0511427100.01.T01 | Epstein-Barr virus EBNA-1-like                                         |
| augustus-11-processed-gene-32.20-mRNA-1  | Japonica | NA       |               |              | OsR498G0101775500.01.T01 | Putative VVTN beta-propeller repeat-containing protein                 |
| augustus-11-processed-gene-33.42-mRNA-1  | Japonica | NA       |               |              | OsR498G1119510100.01.T01 | Serine/arginine repetitive matrix protein 1-like                       |
| augustus-11-processed-gene-34.15-mRNA-1  | Japonica | Indica   |               | Os11g0179700 | OsR498G1119517500.01.T01 | Dirigent protein 2                                                     |
| augustus-11-processed-gene-34.18-mRNA-1  | Japonica | NA       |               | Os11g0180000 | OsR498G1119518700.01.T02 |                                                                        |
| augustus-11-processed-gene-36.0-mRNA-1   | Japonica | NA       |               | Os11g0181800 | OsR498G1119522900.01.T07 | Glucose/ribitol dehydrogenase                                          |
| augustus-11-processed-gene-37.29-mRNA-1  | Japonica | NA       |               | Os11g0184100 | OsR498G1119530100.01.T04 | Steroid 5-alpha-reductase DET2                                         |
| augustus-11-processed-gene-37.32-mRNA-1  | Japonica | NA       |               | Os09g0491100 | OsR498G0917727000.01.T01 | 4-hydroxy-7-methoxy-3-oxo-3,4-dihydro-2H-1,4-benzoxazin-2-yl glucoside |
| augustus-11-processed-gene-38.0-mRNA-1   | Japonica | NA       |               | Os11g0185100 |                          |                                                                        |
| augustus-11-processed-gene-39.2-mRNA-1   | Japonica | NA       |               | Os11g0186800 | OsR498G1119536300.01.T02 | Anion transporter 5 like                                               |
| augustus-11-processed-gene-40.14-mRNA-1  | Japonica | NA       |               | Os05g0267732 | OsR498G0510209200.01.T01 |                                                                        |
| augustus-11-processed-gene-40.15-mRNA-1  | Japonica | NA       |               | Os05g0267732 | OsR498G0510209200.01.T01 |                                                                        |
| augustus-11-processed-gene-41.20-mRNA-1  | Japonica | NA       |               | Os11g0194600 | OsR498G1119545900.01.T01 | PMEI domain-containing protein                                         |
| augustus-11-processed-gene-42.15-mRNA-1  | Japonica | NA       |               |              |                          |                                                                        |
| augustus-11-processed-gene-43.12-mRNA-1  | Japonica | NA       |               | Os11g0261900 | OsR498G1119742100.01.T04 | Shewanella-like protein phosphatase 2                                  |
| augustus-11-processed-gene-43.45-mRNA-1  | Japonica | Japonica | NBS-TM        | Os11g0263000 | OsR498G1119746200.01.T02 | Similar to NBS-LRR disease resistance protein homologue                |
| augustus-11-processed-gene-46.39-mRNA-1  | Japonica | NA       |               | Os11g0267000 | OsR498G1119770300.01.T01 | tetrapyrrole-binding protein, chloroplastic-like                       |
| augustus-11-processed-gene-47.25-mRNA-1  | Japonica | NA       |               | Os07g0415700 | OsR498G1018346700.01.T01 | Hydroxyproline-rich glycoprotein-like                                  |
| augustus-11-processed-gene-49.12-mRNA-1  | Japonica | NA       |               |              |                          | Disease resistance protein RPM1                                        |
| augustus-11-processed-gene-49.13-mRNA-1  | Japonica | NA       | CC-LRR-NBS-TM | Os11g0270500 | OsR498G1119789300.01.T01 | NB-ARC domain, putative                                                |
| augustus-11-processed-gene-54.21-mRNA-1  | Japonica | NA       |               |              | OsR498G1119729300.01.T01 |                                                                        |
| augustus-11-processed-gene-55.15-mRNA-1  | Japonica | NA       |               |              | OsR498G0510294600.01.T01 | Zinc knuckle containing protein-like                                   |
| augustus-11-processed-gene-6.102-mRNA-1  | Japonica | NA       |               | Os11g0128400 | OsR498G1119357300.01.T01 | Cell division control protein 45                                       |
| augustus-11-processed-gene-6.103-mRNA-1  | Japonica | NA       |               | Os11g0128600 |                          |                                                                        |
| augustus-11-processed-gene-61.5-mRNA-1   | Japonica | NA       |               |              |                          | Exopolygalacturonase clone GBGE184                                     |
| augustus-11-processed-gene-61.7-mRNA-1   | Japonica | Indica   | Kinase-LRR-TM | Os11g0249900 | OsR498G1119716500.01.T01 | Probably inactive leucine-rich repeat receptor-like protein kinase     |
| augustus-11-processed-gene-69.18-mRNA-1  | Japonica | NA       |               |              | OsR498G0307081900.01.T01 |                                                                        |
| augustus-11-processed-gene-7.15-mRNA-1   | Japonica | NA       |               | Os11g0131100 | OsR498G1119366100.01.T01 | VQ motif family protein, expressed                                     |
| augustus-11-processed-gene-7.17-mRNA-1   | Japonica | NA       |               | Os12g0128300 | OsR498G1220873500.01.T01 | Pentatricopeptide, putative, expressed                                 |
| augustus-11-processed-gene-70.2-mRNA-1   | Japonica | NA       |               | Os11g0207100 | OsR498G1119587900.01.T03 | Transcriptional corepressor SEUSS                                      |
| augustus-11-processed-gene-75.39-mRNA-1  | Japonica | NA       | LRR-TM        | Os11g0213500 | OsR498G1119614900.01.T01 | Pentatricopeptide repeat-containing protein                            |
| augustus-11-processed-gene-75.43-mRNA-1  | Japonica | Japonica |               | Os11g0214400 | OsR498G1119617700.01.T01 | Dirigent protein (Fragment)                                            |
| augustus-11-processed-gene-76.18-mRNA-1  | Japonica | NA       |               | Os11g0215100 | OsR498G1119617900.01.T01 | Dirigent protein (Fragment)                                            |
| augustus-11-processed-gene-76.4-mRNA-1   | Japonica | NA       |               | Os11g0214700 | OsR498G1119617700.01.T01 | Dirigent protein (Fragment)                                            |
| augustus-11-processed-gene-79.18-mRNA-1  | Japonica | NA       |               | Os11g0221300 | OsR498G1119635700.01.T01 | Putative auxin-responsive protein IAA29                                |
| augustus-11-processed-gene-8.78-mRNA-1   | Japonica | NA       |               |              | OsR498G1119368700.01.T03 | Non-reducing end alpha-L-arabinofuranosidase                           |
| augustus-11-processed-gene-8.93-mRNA-1   | Japonica | NA       |               |              | OsR498G0203751900.01.T06 | PORR domain-containing protein (Fragment)                              |
| augustus-11-processed-gene-8.94-mRNA-1   | Japonica | NA       | CC-Kinase-TM  | Os11g0132900 | OsR498G1119371300.01.T01 | Non-specific serine/threonine protein kinase                           |
| augustus-11-processed-gene-8.96-mRNA-1   | Japonica | Indica   | Kinase-TM     | Os12g0130300 | OsR498G1119373100.01.T01 | Receptor-like serine/threonine-protein kinase                          |
| augustus-11-processed-gene-8.97-mRNA-1   | Japonica | NA       |               | Os11g0133600 | OsR498G1119374500.01.T01 | Heterogeneous nuclear ribonucleoprotein F                              |

|                                          |          |          |               |              |                          |                                                                            |
|------------------------------------------|----------|----------|---------------|--------------|--------------------------|----------------------------------------------------------------------------|
| augustus-11-processed-gene-81.10-mRNA-1  | Japonica | NA       |               |              | OsR498G1019116800.01.T01 |                                                                            |
| augustus-11-processed-gene-81.11-mRNA-1  | Japonica | Japonica |               | Os07g0543700 | OsR498G1120733700.01.T01 | Retrotransposon protein, putative, Ty3-gypsy sub-class                     |
| augustus-11-processed-gene-81.30-mRNA-1  | Japonica | NA       |               |              |                          |                                                                            |
| augustus-11-processed-gene-81.9-mRNA-1   | Japonica | NA       |               |              | OsR498G1119639100.01.T01 |                                                                            |
| augustus-11-processed-gene-83.15-mRNA-1  | Japonica | NA       | LRR-NBS-TM    | Os11g0229400 | OsR498G1119649900.01.T03 | NBS-LRR type protein (Fragment)                                            |
| augustus-11-processed-gene-84.35-mRNA-1  | Japonica | NA       |               |              | OsR498G1119653300.01.T01 |                                                                            |
| augustus-11-processed-gene-89.15-mRNA-1  | Japonica | NA       |               | Os11g0241000 | OsR498G1119684100.01.T01 |                                                                            |
| augustus-11-processed-gene-94.0-mRNA-1   | Japonica | NA       |               |              | OsR498G1119917900.01.T01 | F-box/LRR-repeat protein 4                                                 |
| augustus-12-processed-gene-0.3-mRNA-1    | Japonica | NA       |               | Os11g0100150 |                          |                                                                            |
| augustus-12-processed-gene-0.4-mRNA-1    | Japonica | NA       |               | Os11g0100200 | OsR498G1220782900.01.T03 | THO complex subunit 4-A                                                    |
| augustus-12-processed-gene-10.1-mRNA-1   | Japonica | NA       |               |              | OsR498G1220828000.01.T03 | Bis(5'-adenosyl)-triphosphatase                                            |
| augustus-12-processed-gene-10.19-mRNA-1  | Japonica | Japonica |               | Os12g0120900 | OsR498G1220825200.01.T01 | Pentatricopeptide repeat-containing protein                                |
| augustus-12-processed-gene-10.21-mRNA-1  | Japonica | NA       |               | Os12g0121600 | OsR498G1220848300.01.T01 | Cation/H(+) antiporter 15                                                  |
| augustus-12-processed-gene-100.11-mRNA-1 | Japonica | NA       |               |              | OsR498G1221264300.01.T02 | Pentatricopeptide repeat                                                   |
| augustus-12-processed-gene-103.15-mRNA-1 | Japonica | NA       |               |              |                          |                                                                            |
| augustus-12-processed-gene-106.25-mRNA-1 | Japonica | NA       |               |              | OsR498G1221301600.01.T01 |                                                                            |
| augustus-12-processed-gene-109.1-mRNA-1  | Japonica | NA       |               | Os06g0114366 | OsR498G0613198100.01.T01 | Selenium-binding protein-like                                              |
| augustus-12-processed-gene-11.44-mRNA-1  | Japonica | NA       |               |              | OsR498G1220852300.01.T01 | Retrotransposon protein, putative, unclassified                            |
| augustus-12-processed-gene-110.0-mRNA-1  | Japonica | NA       |               | Os12g0283400 | OsR498G1221320300.01.T01 | Pectinesterase inhibitor 28                                                |
| augustus-12-processed-gene-110.9-mRNA-1  | Japonica | NA       |               |              |                          | protein ACCELERATED CELL DEATH 6-like                                      |
| augustus-12-processed-gene-114.41-mRNA-1 | Japonica | NA       |               |              | OsR498G1221348100.01.T02 | Helicase and polymerase-containing protein TEBICHI                         |
| augustus-12-processed-gene-115.14-mRNA-1 | Japonica | NA       |               |              |                          | RNA-directed DNA polymerase                                                |
| augustus-12-processed-gene-124.16-mRNA-1 | Japonica | NA       |               | Os12g0405100 | OsR498G1221366300.01.T01 | Zinc finger CCCH domain-containing protein 66                              |
| augustus-12-processed-gene-126.23-mRNA-1 | Japonica | NA       |               | Os12g0407800 | OsR498G1221372700.01.T03 | Pentatricopeptide repeat-containing protein                                |
| augustus-12-processed-gene-127.10-mRNA-1 | Japonica | NA       |               |              | OsR498G1221377300.01.T04 |                                                                            |
| augustus-12-processed-gene-137.1-mRNA-1  | Japonica | Indica   |               | Os01g0389200 | OsR498G1221417500.01.T01 |                                                                            |
| augustus-12-processed-gene-14.55-mRNA-1  | Japonica | NA       |               | Os12g0128300 | OsR498G1220873500.01.T01 | Pentatricopeptide, putative, expressed                                     |
| augustus-12-processed-gene-14.68-mRNA-1  | Japonica | NA       |               | Os11g0132100 | OsR498G1119369400.01.T01 | PMEI domain-containing protein (Fragment)                                  |
| augustus-12-processed-gene-14.82-mRNA-1  | Japonica | NA       |               |              |                          | Aladin isoform A                                                           |
| augustus-12-processed-gene-15.1-mRNA-1   | Japonica | NA       |               |              | OsR498G1220878500.01.T02 |                                                                            |
| augustus-12-processed-gene-15.14-mRNA-1  | Japonica | NA       |               | Os12g0131000 | OsR498G1220884900.01.T01 | Heterogeneous nuclear ribonucleoprotein F                                  |
| augustus-12-processed-gene-15.2-mRNA-1   | Japonica | Japonica |               | Os12g0129700 | OsR498G1220879500.01.T01 | F-box domain containing protein, expressed                                 |
| augustus-12-processed-gene-151.7-mRNA-1  | Japonica | NA       | NBS-TM        | Os12g0438300 | OsR498G1221468900.01.T01 | Disease resistance protein RGA2                                            |
| augustus-12-processed-gene-156.16-mRNA-1 | Japonica | NA       |               | Os12g0443500 | OsR498G1221501200.01.T01 | UDP-glucose 6-dehydrogenase 5                                              |
| augustus-12-processed-gene-156.17-mRNA-1 | Japonica | NA       |               | Os12g0443600 | OsR498G1221500400.01.T03 | UDP-glucose 6-dehydrogenase 3                                              |
| augustus-12-processed-gene-167.10-mRNA-1 | Japonica | NA       |               | Os12g0455000 | OsR498G1221537900.01.T01 | Kazal-like domain-containing protein                                       |
| augustus-12-processed-gene-167.22-mRNA-1 | Japonica | Japonica |               | Os12g0456100 | OsR498G1221540900.01.T05 | Putative pentatricopeptide repeat-containing protein mitochondrial         |
| augustus-12-processed-gene-167.8-mRNA-1  | Japonica | Japonica | Kinase-TM     | Os12g0454800 | OsR498G1221536100.01.T01 | Histidine kinase2                                                          |
| augustus-12-processed-gene-170.13-mRNA-1 | Japonica | NA       |               | Os12g0460000 | OsR498G1221549300.01.T01 |                                                                            |
| augustus-12-processed-gene-170.7-mRNA-1  | Japonica | NA       |               |              |                          | AT hook motif-containing protein, putative, expressed                      |
| augustus-12-processed-gene-171.6-mRNA-1  | Japonica | NA       |               |              | OsR498G1221550500.01.T01 |                                                                            |
| augustus-12-processed-gene-173.17-mRNA-1 | Japonica | Indica   |               | Os12g0465100 | OsR498G1221564100.01.T01 |                                                                            |
| augustus-12-processed-gene-173.6-mRNA-1  | Japonica | NA       |               | Os12g0464200 | OsR498G1221563300.01.T01 | F-box domain containing protein, expressed                                 |
| augustus-12-processed-gene-175.1-mRNA-1  | Japonica | Indica   |               | Os12g0467200 | OsR498G1221571300.01.T01 |                                                                            |
| augustus-12-processed-gene-178.12-mRNA-1 | Japonica | NA       |               | Os12g0471100 | OsR498G1221576100.01.T01 | Adenosinetriphosphatase                                                    |
| augustus-12-processed-gene-179.10-mRNA-1 | Japonica | NA       |               | Os12g0472500 | OsR498G1221579700.01.T01 | TPD1 protein homolog 1                                                     |
| augustus-12-processed-gene-180.1-mRNA-1  | Japonica | NA       |               |              | OsR498G1221583500.01.T01 | Protease inhibitor/seed storage/LTP family protein                         |
| augustus-12-processed-gene-182.1-mRNA-1  | Japonica | NA       |               |              | OsR498G1221585700.01.T01 | Retrotransposon protein, putative, Ty3-gypsy subclass                      |
| augustus-12-processed-gene-182.13-mRNA-1 | Japonica | Indica   | CC-LRR-NBS-TM | Os12g0477100 | OsR498G1221588100.01.T01 | NB-ARC domain containing protein, expressed                                |
| augustus-12-processed-gene-184.1-mRNA-1  | Japonica | NA       |               | Os12g0478400 |                          | Wall-associated receptor kinase 3                                          |
| augustus-12-processed-gene-184.2-mRNA-1  | Japonica | NA       |               |              | OsR498G1120619900.01.T01 | UvrD-like helicase C-terminal domain/Helix-hairpin-helix containing domain |
| augustus-12-processed-gene-186.9-mRNA-1  | Japonica | NA       |               |              | OsR498G0815948900.01.T01 | Hydroxyproline-rich glycoprotein-like                                      |
| augustus-12-processed-gene-187.0-mRNA-1  | Japonica | Indica   |               | Os12g0482600 | OsR498G1221614700.01.T01 | Protein CONTINUOUS VASCULAR RING like                                      |
| augustus-12-processed-gene-187.33-mRNA-1 | Japonica | NA       |               |              | OsR498G0510294600.01.T01 | Zinc knuckle domain-like                                                   |
| augustus-12-processed-gene-188.25-mRNA-1 | Japonica | Indica   |               | Os12g0484900 | OsR498G1221621100.01.T02 | Growth-regulating factor like                                              |
| augustus-12-processed-gene-19.11-mRNA-1  | Japonica | NA       |               | Os12g0134900 | OsR498G1119389500.01.T01 | Putative cytochrome P450-dependent fatty acid hydroxylase                  |
| augustus-12-processed-gene-19.12-mRNA-1  | Japonica | NA       |               | Os12g0135200 | OsR498G1119390700.01.T01 | Kelch motif family protein, expressed                                      |
| augustus-12-processed-gene-19.18-mRNA-1  | Japonica | Japonica |               | Os12g0136100 | OsR498G1220899500.01.T01 | TPT domain-containing protein                                              |
| augustus-12-processed-gene-19.20-mRNA-1  | Japonica | Indica   |               | Os05g0495200 | OsR498G1220899900.01.T02 | Basic-leucine zipper transcription factor                                  |
| augustus-12-processed-gene-190.2-mRNA-1  | Japonica | NA       |               | Os12g0486800 |                          |                                                                            |
| augustus-12-processed-gene-191.1-mRNA-1  | Japonica | NA       |               |              | OsR498G0511427100.01.T01 | Epstein-Barr virus EBNA-1-like                                             |

|                                          |          |          |               |              |                          |                                                                       |
|------------------------------------------|----------|----------|---------------|--------------|--------------------------|-----------------------------------------------------------------------|
| augustus-12-processed-gene-193.0-mRNA-1  | Japonica | NA       |               |              |                          | Transcription termination factor MTERF15, mitochondrial               |
| augustus-12-processed-gene-198.43-mRNA-1 | Japonica | Japonica | Kinase-LRR-TM | Os12g0498650 | OsR498G1221664100.01.T01 | Protein kinase domain-containing protein (Fragment)                   |
| augustus-12-processed-gene-198.45-mRNA-1 | Japonica | NA       |               | Os12g0498900 | OsR498G1221666100.01.T01 | Transmembrane protein                                                 |
| augustus-12-processed-gene-199.19-mRNA-1 | Japonica | NA       |               |              | OsR498G0611633900.01.T01 |                                                                       |
| augustus-12-processed-gene-200.10-mRNA-1 | Japonica | NA       |               | Os12g0502200 | OsR498G1221670300.01.T04 | Glycine-rich protein2                                                 |
| augustus-12-processed-gene-202.12-mRNA-1 | Japonica | NA       |               | Os05g0128900 | OsR498G0816083200.01.T02 | Trehalose-phosphatase                                                 |
| augustus-12-processed-gene-204.10-mRNA-1 | Japonica | NA       |               | Os12g0508400 | OsR498G1221692700.01.T02 |                                                                       |
| augustus-12-processed-gene-205.31-mRNA-1 | Japonica | NA       |               |              |                          | Putative retroelement                                                 |
| augustus-12-processed-gene-205.35-mRNA-1 | Japonica | NA       | NBS-TM        |              | OsR498G1221700900.01.T01 | NB-ARC domain containing protein, expressed                           |
| augustus-12-processed-gene-207.6-mRNA-1  | Japonica | NA       |               | Os12g0512100 | OsR498G1221705000.01.T01 | MFS domain-containing protein (Fragment)                              |
| augustus-12-processed-gene-21.14-mRNA-1  | Japonica | NA       |               | Os12g0139400 | OsR498G1220910900.01.T01 | Two-component response regulator ORR10                                |
| augustus-12-processed-gene-21.15-mRNA-1  | Japonica | NA       |               |              | OsR498G1119403900.01.T01 |                                                                       |
| augustus-12-processed-gene-21.18-mRNA-1  | Japonica | Japonica |               | Os12g0140200 | OsR498G1119404100.01.T01 | probable calcium-binding protein CML25                                |
| augustus-12-processed-gene-21.24-mRNA-1  | Japonica | NA       |               | Os12g0140600 | OsR498G1220914900.01.T04 | RING finger protein 38                                                |
| augustus-12-processed-gene-219.15-mRNA-1 | Japonica | NA       |               | Os12g0540000 | OsR498G1221781100.01.T01 |                                                                       |
| augustus-12-processed-gene-22.0-mRNA-1   | Japonica | Indica   |               | Os11g0144900 | OsR498G1220915700.01.T01 | PGG domain-containing protein                                         |
| augustus-12-processed-gene-22.1-mRNA-1   | Japonica | NA       |               | Os12g0141000 | OsR498G1119405700.01.T01 | Embryogenesis transmembrane protein-like                              |
| augustus-12-processed-gene-220.0-mRNA-1  | Japonica | NA       |               |              |                          | Cell wall protein-like                                                |
| augustus-12-processed-gene-227.9-mRNA-1  | Japonica | Indica   |               | Os12g0261300 | OsR498G1221851600.01.T01 | Patatin                                                               |
| augustus-12-processed-gene-229.35-mRNA-1 | Japonica | Indica   |               | Os12g0556100 | OsR498G1221864300.01.T01 | Protein DEHYDRATION-INDUCED 19 homolog 3                              |
| augustus-12-processed-gene-229.43-mRNA-1 | Japonica | NA       |               | Os12g0556200 | OsR498G1221864900.01.T02 | Calmodulin-binding protein, putative, expressed                       |
| augustus-12-processed-gene-229.48-mRNA-1 | Japonica | Japonica |               | Os12g0556900 | OsR498G1221867300.01.T01 | Calmodulin-binding protein-like                                       |
| augustus-12-processed-gene-231.28-mRNA-1 | Japonica | NA       |               | Os12g0559400 |                          | Disease resistance protein RPM1                                       |
| augustus-12-processed-gene-232.11-mRNA-1 | Japonica | NA       |               |              | OsR498G1221878700.01.T02 | BZIP transcription factor                                             |
| augustus-12-processed-gene-234.3-mRNA-1  | Japonica | Indica   |               | Os12g0563600 | OsR498G1221888700.01.T01 | 26S proteasome non-ATPase regulatory subunit like                     |
| augustus-12-processed-gene-237.22-mRNA-1 | Japonica | Indica   |               | Os11g0703900 | OsR498G1221905900.01.T03 | Putative mediator of RNA polymerase II transcription subunit 37c      |
| augustus-12-processed-gene-237.23-mRNA-1 | Japonica | NA       |               | Os12g0569900 | OsR498G1221906500.01.T01 | Dof-type zinc finger protein 28                                       |
| augustus-12-processed-gene-237.4-mRNA-1  | Japonica | NA       |               | Os12g0569000 |                          |                                                                       |
| augustus-12-processed-gene-238.40-mRNA-1 | Japonica | Japonica |               | Os12g0571700 | OsR498G1221912500.01.T01 |                                                                       |
| augustus-12-processed-gene-239.1-mRNA-1  | Japonica | Japonica |               | Os12g0572700 | OsR498G1018848000.01.T01 | Exostosin family protein, expressed                                   |
| augustus-12-processed-gene-239.13-mRNA-1 | Japonica | NA       |               | Os12g0573200 | OsR498G1221918700.01.T01 | GRAS family transcription factor containing protein, expressed        |
| augustus-12-processed-gene-24.33-mRNA-1  | Japonica | NA       |               | Os12g0144100 |                          | Jacalin-type lectin domain-containing protein (Fragment)              |
| augustus-12-processed-gene-243.22-mRNA-1 | Japonica | Indica   |               | Os12g0580400 | OsR498G1221944300.01.T01 | Polyamine transporter like                                            |
| augustus-12-processed-gene-243.28-mRNA-1 | Japonica | NA       |               | Os12g0580900 | OsR498G1221945900.01.T01 | Protein-serine/threonine phosphatase                                  |
| augustus-12-processed-gene-248.16-mRNA-1 | Japonica | NA       |               | Os12g0587200 | OsR498G1221992910.01.T02 | PMD domain-containing protein                                         |
| augustus-12-processed-gene-25.23-mRNA-1  | Japonica | NA       |               | Os12g0147200 | OsR498G1220936500.01.T01 | RING-type domain-containing protein                                   |
| augustus-12-processed-gene-250.31-mRNA-1 | Japonica | NA       |               | Os12g0590900 | OsR498G1222008300.01.T01 | Pyridoxal phosphate (PLP)-dependent transferases superfamily protein  |
| augustus-12-processed-gene-250.39-mRNA-1 | Japonica | Indica   |               | Os12g0592300 | OsR498G1222010700.01.T01 | B3 DNA binding domain containing protein                              |
| augustus-12-processed-gene-251.13-mRNA-1 | Japonica | NA       |               |              | OsR498G1222021700.01.T01 |                                                                       |
| augustus-12-processed-gene-251.7-mRNA-1  | Japonica | Indica   |               | Os12g0591600 | OsR498G1222011000.01.T01 | probable transcription factor KAN4                                    |
| augustus-12-processed-gene-253.57-mRNA-1 | Japonica | Indica   |               | Os12g0595800 | OsR498G1222032500.01.T01 | Protein kinase domain-containing protein                              |
| augustus-12-processed-gene-253.59-mRNA-1 | Japonica | Japonica |               | Os12g0596300 | OsR498G1222033300.01.T01 | Phorbol-ester/DAG-type domain-containing protein (Fragment)           |
| augustus-12-processed-gene-254.0-mRNA-1  | Japonica | Indica   |               | Os12g0597600 | OsR498G1222036300.01.T03 | Nucleic acid binding protein                                          |
| augustus-12-processed-gene-255.23-mRNA-1 | Japonica | NA       |               | Os12g0599800 | OsR498G1222046500.01.T01 | PMEI domain-containing protein (Fragment)                             |
| augustus-12-processed-gene-26.12-mRNA-1  | Japonica | NA       |               | Os12g0149000 | OsR498G1220942300.01.T03 |                                                                       |
| augustus-12-processed-gene-260.18-mRNA-1 | Japonica | Japonica | Kinase-TM     | Os12g0608500 | OsR498G1222080600.01.T01 | Lectin protein kinase, putative, expressed                            |
| augustus-12-processed-gene-260.19-mRNA-1 | Japonica | Japonica |               | Os12g0609200 | OsR498G0816121400.01.T01 | Tify domain-containing protein                                        |
| augustus-12-processed-gene-260.23-mRNA-1 | Japonica | NA       |               |              | OsR498G0305810200.01.T01 |                                                                       |
| augustus-12-processed-gene-260.4-mRNA-1  | Japonica | Indica   |               | Os12g0607800 | OsR498G1222075700.01.T01 | DUF295 domain-containing protein                                      |
| augustus-12-processed-gene-261.30-mRNA-1 | Japonica | NA       |               | Os12g0610100 |                          |                                                                       |
| augustus-12-processed-gene-261.31-mRNA-1 | Japonica | NA       |               | Os12g0610200 | OsR498G1222083900.01.T01 | BHLH domain-containing protein (Fragment)                             |
| augustus-12-processed-gene-262.26-mRNA-1 | Japonica | NA       |               | Os03g0110200 |                          | Transposon protein, putative, Mutator sub-class, expressed            |
| augustus-12-processed-gene-262.8-mRNA-1  | Japonica | NA       |               | Os12g0611900 | OsR498G1222092500.01.T02 | Beta-1,4-mannosyl-glycoprotein 4-beta-N-acetylglucosaminyltransferase |
| augustus-12-processed-gene-264.32-mRNA-1 | Japonica | NA       | Kinase-TM     | Os12g0614600 | OsR498G1222101900.01.T01 | Protein kinase PINOID                                                 |
| augustus-12-processed-gene-264.34-mRNA-1 | Japonica | Indica   | Kinase-TM     | Os12g0615300 | OsR498G1222102900.01.T01 | Wall-associated receptor kinase 5                                     |
| augustus-12-processed-gene-264.46-mRNA-1 | Japonica | NA       | Kinase-TM     | Os12g0615300 | OsR498G1222104500.01.T04 | Wall-associated receptor kinase 5                                     |
| augustus-12-processed-gene-264.49-mRNA-1 | Japonica | Indica   |               | Os12g0615900 | OsR498G1222106300.01.T01 | p21-activated protein kinase-interacting protein 1-like isoform X1    |
| augustus-12-processed-gene-266.21-mRNA-1 | Japonica | NA       |               | Os12g0617400 | OsR498G1222114300.01.T01 | Plastid 9-cis-epoxycarotenoid dioxygenase                             |
| augustus-12-processed-gene-268.23-mRNA-1 | Japonica | NA       |               | Os12g0621000 | OsR498G1222128900.01.T02 | Ubiquitin carboxyl-terminal hydrolase                                 |
| augustus-12-processed-gene-269.45-mRNA-1 | Japonica | Japonica |               | Os12g0622500 | OsR498G1222134700.01.T01 |                                                                       |
| augustus-12-processed-gene-27.0-mRNA-1   | Japonica | Japonica |               | Os12g0150500 | OsR498G0815138700.01.T01 | Phytocyanin domain-containing protein (Fragment)                      |

|                                          |          |          |           |              |                          |                                                                 |
|------------------------------------------|----------|----------|-----------|--------------|--------------------------|-----------------------------------------------------------------|
| augustus-12-processed-gene-27.15-mRNA-1  | Japonica | NA       |           | Os12g0151500 | OsR498G1220949700.01.T01 | sialyltransferase-like protein 1 isoform X1                     |
| augustus-12-processed-gene-270.2-mRNA-1  | Japonica | NA       |           | Os12g0624200 | OsR498G1222139900.01.T01 | Sodium/calcium exchanger protein, expressed                     |
| augustus-12-processed-gene-270.3-mRNA-1  | Japonica | NA       |           |              | OsR498G1222140300.01.T01 | Aminoacyl-tRNA hydrolase                                        |
| augustus-12-processed-gene-271.4-mRNA-1  | Japonica | NA       |           |              | OsR498G1222145800.01.T01 |                                                                 |
| augustus-12-processed-gene-272.25-mRNA-1 | Japonica | Japonica |           | Os12g0628200 | OsR498G1222149500.01.T01 |                                                                 |
| augustus-12-processed-gene-272.27-mRNA-1 | Japonica | NA       |           | Os12g0630200 | OsR498G1222152700.01.T01 | Zeamatin                                                        |
| augustus-12-processed-gene-34.26-mRNA-1  | Japonica | NA       |           | Os12g0162800 |                          |                                                                 |
| augustus-12-processed-gene-35.38-mRNA-1  | Japonica | Japonica |           | Os12g0164600 | OsR498G1119470500.01.T01 |                                                                 |
| augustus-12-processed-gene-37.39-mRNA-1  | Japonica | NA       |           | Os12g0168800 | OsR498G1221019100.01.T03 | GATA transcription factor 5                                     |
| augustus-12-processed-gene-38.0-mRNA-1   | Japonica | NA       |           | Os12g0170400 |                          | Sensitive to proton rhizotoxicity1                              |
| augustus-12-processed-gene-39.32-mRNA-1  | Japonica | NA       |           | Os12g0173333 | OsR498G1221028300.01.T01 | TCP transcription factor                                        |
| augustus-12-processed-gene-4.20-mRNA-1   | Japonica | NA       |           | Os12g0107600 | OsR498G1119296700.01.T01 | Protein DETOXIFICATION                                          |
| augustus-12-processed-gene-40.23-mRNA-1  | Japonica | NA       |           | Os12g0174300 | OsR498G1221031900.01.T01 | Serine/arginine repetitive matrix protein 1-like                |
| augustus-12-processed-gene-41.13-mRNA-1  | Japonica | NA       | Kinase-TM |              | OsR498G1221041100.01.T01 | Non-specific serine/threonine protein kinase                    |
| augustus-12-processed-gene-41.14-mRNA-1  | Japonica | Indica   |           | Os11g0186200 | OsR498G1221041300.01.T01 | Aldehyde dehydrogenase NADP-dependent                           |
| augustus-12-processed-gene-41.15-mRNA-1  | Japonica | NA       |           |              | OsR498G1221042100.01.T01 | probable methyltransferase PMT26                                |
| augustus-12-processed-gene-43.43-mRNA-1  | Japonica | Japonica |           | Os12g0181900 | OsR498G1221049100.01.T04 | Pentatricopeptide repeat                                        |
| augustus-12-processed-gene-44.36-mRNA-1  | Japonica | NA       |           | Os12g0182500 | OsR498G1221050900.01.T01 |                                                                 |
| augustus-12-processed-gene-44.55-mRNA-1  | Japonica | NA       |           | Os02g0806500 | OsR498G0204973200.01.T01 | Poly (A) polymerase                                             |
| augustus-12-processed-gene-44.57-mRNA-1  | Japonica | NA       |           |              | OsR498G0815170600.01.T01 | DUF834 domain-containing protein                                |
| augustus-12-processed-gene-47.30-mRNA-1  | Japonica | NA       |           | Os12g0189300 |                          | Carboxyvinyl-carboxyphosphonate phosphorylmutase, chloroplastic |
| augustus-12-processed-gene-5.47-mRNA-1   | Japonica | NA       |           | Os12g0109600 | OsR498G1220812100.01.T01 |                                                                 |
| augustus-12-processed-gene-5.48-mRNA-1   | Japonica | NA       |           | Os12g0109800 | OsR498G1220813700.01.T01 | Pentatricopeptide, putative                                     |
| augustus-12-processed-gene-53.1-mRNA-1   | Japonica | NA       |           |              | OsR498G1221088300.01.T01 | Serine/threonine-protein kinase OX1                             |
| augustus-12-processed-gene-53.29-mRNA-1  | Japonica | NA       |           | Os12g0198700 | OsR498G1221091800.01.T01 | Dirigent protein (Fragment)                                     |
| augustus-12-processed-gene-53.30-mRNA-1  | Japonica | NA       |           | Os12g0199000 | OsR498G1221093800.01.T01 | inactive protein RESTRICTED TEV MOVEMENT 1-like                 |
| augustus-12-processed-gene-56.15-mRNA-1  | Japonica | NA       |           |              | OsR498G1221095700.01.T05 | Putative serine/threonine-protein kinase                        |
| augustus-12-processed-gene-57.3-mRNA-1   | Japonica | NA       | CC-NBS-TM | Os12g0204700 | OsR498G1221097900.01.T01 | NB-ARC domain containing protein, expressed                     |
| augustus-12-processed-gene-58.0-mRNA-1   | Japonica | NA       |           | Os12g0206700 | OsR498G1221102500.01.T03 |                                                                 |
| augustus-12-processed-gene-6.89-mRNA-1   | Japonica | NA       |           | Os12g0111000 |                          | Retrotransposon protein, putative, Ty3-gypsy subclass           |
| augustus-12-processed-gene-6.95-mRNA-1   | Japonica | NA       |           | Os12g0112250 | OsR498G1220818300.01.T05 | Surfactant protein B containing protein                         |
| augustus-12-processed-gene-65.13-mRNA-1  | Japonica | NA       |           |              | OsR498G0408300400.01.T01 | Hydroxyproline-rich glycoprotein-like                           |
| augustus-12-processed-gene-65.15-mRNA-1  | Japonica | NA       |           | Os12g0218300 |                          |                                                                 |
| augustus-12-processed-gene-66.2-mRNA-1   | Japonica | NA       |           | Os12g0218800 |                          |                                                                 |
| augustus-12-processed-gene-66.21-mRNA-1  | Japonica | NA       |           |              | OsR498G1221133700.01.T01 |                                                                 |
| augustus-12-processed-gene-66.22-mRNA-1  | Japonica | Indica   | LRR-TM    | Os12g0218500 | OsR498G1221134900.01.T01 | Leucine Rich Repeat family protein, expressed                   |
| augustus-12-processed-gene-7.39-mRNA-1   | Japonica | NA       |           | Os12g0113900 | OsR498G1119317100.01.T03 | DUF641 domain-containing protein (Fragment)                     |
| augustus-12-processed-gene-7.44-mRNA-1   | Japonica | NA       |           | Os11g0115466 | OsR498G1220845600.01.T01 | Non-specific lipid-transfer protein (Fragment)                  |
| augustus-12-processed-gene-7.46-mRNA-1   | Japonica | NA       |           | Os12g0115100 | OsR498G1220845200.01.T01 | Non-specific lipid-transfer protein (Fragment)                  |
| augustus-12-processed-gene-71.43-mRNA-1  | Japonica | Indica   |           | Os12g0226900 | OsR498G1221147500.01.T01 | NADP-dependent oxidoreductase P1, putative, expressed           |
| augustus-12-processed-gene-75.37-mRNA-1  | Japonica | NA       |           | Os12g0233900 | OsR498G1221166700.01.T01 | FAS1 domain-containing protein (Fragment)                       |
| augustus-12-processed-gene-76.11-mRNA-1  | Japonica | NA       |           |              |                          | ATP-dependent DNA helicase                                      |
| augustus-12-processed-gene-79.5-mRNA-1   | Japonica | NA       |           | Os07g0543700 | OsR498G1120733700.01.T01 | Retrotransposon protein, putative, Ty3-gypsy sub-class          |
| augustus-12-processed-gene-8.0-mRNA-1    | Japonica | NA       |           | Os12g0115300 | OsR498G1220844800.01.T01 | Non-specific lipid-transfer protein (Fragment)                  |
| augustus-12-processed-gene-8.2-mRNA-1    | Japonica | NA       |           |              | OsR498G1220843600.01.T04 | RING-H2 finger protein ATL44                                    |
| augustus-12-processed-gene-81.16-mRNA-1  | Japonica | NA       |           | Os12g0243100 | OsR498G1221200500.01.T01 |                                                                 |
| augustus-12-processed-gene-9.82-mRNA-1   | Japonica | NA       |           | Os12g0118800 | OsR498G1220833300.01.T06 | RNase H domain-containing protein                               |
| augustus-12-processed-gene-91.12-mRNA-1  | Japonica | NA       |           | Os12g0257500 | OsR498G1221223100.01.T02 | Reverse transcriptase domain-containing protein                 |
| augustus-12-processed-gene-94.10-mRNA-1  | Japonica | NA       |           | Os12g0262000 |                          | HAT family dimerisation domain containing protein, expressed    |
| augustus-12-processed-gene-94.9-mRNA-1   | Japonica | NA       |           |              |                          | Hydroxyproline-rich glycoprotein-like                           |
| augustus-12-processed-gene-96.25-mRNA-1  | Japonica | NA       |           | Os12g0264500 | OsR498G1221246300.01.T06 | Beta-hydroxyisobutyryl-CoA hydrolase 1                          |
| augustus-12-processed-gene-97.14-mRNA-1  | Japonica | NA       |           | Os12g0265500 | OsR498G0306920300.01.T01 | HAT family dimerisation domain containing protein, expressed    |
| augustus-12-processed-gene-98.13-mRNA-1  | Japonica | NA       |           | Os12g0267500 |                          |                                                                 |
| augustus-2-processed-gene-1.25-mRNA-1    | Japonica | NA       |           | Os02g0102000 |                          | Glutaredoxin                                                    |
| augustus-2-processed-gene-101.2-mRNA-1   | Japonica | Indica   |           | Os02g0274700 | OsR498G0203400900.01.T01 | RanBP2-type domain-containing protein (Fragment)                |
| augustus-2-processed-gene-102.26-mRNA-1  | Japonica | NA       |           |              | OsR498G0203403500.01.T01 | PMD domain-containing protein                                   |
| augustus-2-processed-gene-104.36-mRNA-1  | Japonica | NA       |           | Os02g0280300 | OsR498G0203416300.01.T01 | Xyloglucan endotransglucosylase/hydrolase                       |
| augustus-2-processed-gene-112.40-mRNA-1  | Japonica | NA       |           | Os02g0294000 |                          | MFAP1 domain-containing protein                                 |
| augustus-2-processed-gene-112.52-mRNA-1  | Japonica | NA       |           | Os02g0294100 | OsR498G0203464000.01.T02 | F-box domain-containing protein (Fragment)                      |
| augustus-2-processed-gene-114.14-mRNA-1  | Japonica | Indica   | Kinase-TM | Os02g0298200 | OsR498G0203485500.01.T01 | Putative receptor-type protein kinase LRK1                      |
| augustus-2-processed-gene-115.18-mRNA-1  | Japonica | Indica   | Kinase-TM | Os02g0298200 | OsR498G0203485500.01.T01 | Putative receptor-type protein kinase LRK1                      |

|                                         |          |          |               |              |                          |                                                                            |
|-----------------------------------------|----------|----------|---------------|--------------|--------------------------|----------------------------------------------------------------------------|
| augustus-2-processed-gene-115.36-mRNA-1 | Japonica | Indica   |               | Os02g0297200 | OsR498G0203489200.01.T01 | DUF4220 domain-containing protein (Fragment)                               |
| augustus-2-processed-gene-117.13-mRNA-1 | Japonica | Japonica |               | Os02g0302400 | OsR498G0203521400.01.T03 | Nicotianamine aminotransferase A                                           |
| augustus-2-processed-gene-118.30-mRNA-1 | Japonica | NA       |               | Os02g0303500 | OsR498G0203504400.01.T01 | glycine-rich cell wall structural protein-like                             |
| augustus-2-processed-gene-119.16-mRNA-1 | Japonica | NA       |               | Os02g0304800 | OsR498G0203508300.01.T04 | Pentatricopeptide repeat-containing protein                                |
| augustus-2-processed-gene-121.20-mRNA-1 | Japonica | Indica   |               | Os02g0308400 | OsR498G0203527800.01.T01 | FAS1 domain-containing protein (Fragment)                                  |
| augustus-2-processed-gene-121.21-mRNA-1 | Japonica | NA       |               |              | OsR498G0203529000.01.T01 | Speckle-type POZ protein B                                                 |
| augustus-2-processed-gene-121.7-mRNA-1  | Japonica | NA       |               | Os02g0307900 |                          | Chromatin remodeling protein EBS                                           |
| augustus-2-processed-gene-121.9-mRNA-1  | Japonica | NA       |               | Os02g0308400 | OsR498G0203527200.01.T01 | Fasciclin-like arabinogalactan protein 6                                   |
| augustus-2-processed-gene-124.18-mRNA-1 | Japonica | NA       |               |              | OsR498G0203542800.01.T01 | putative glycine-rich cell wall structural protein 1                       |
| augustus-2-processed-gene-124.9-mRNA-1  | Japonica | NA       |               | Os02g0314100 | OsR498G0203543900.01.T09 | Vacuolar cation/proton exchanger                                           |
| augustus-2-processed-gene-125.1-mRNA-1  | Japonica | NA       |               | Os02g0315400 | OsR498G0203547100.01.T01 | Oligosaccharyltransferase complex subunit ostc-A                           |
| augustus-2-processed-gene-126.12-mRNA-1 | Japonica | NA       |               |              | OsR498G0203555300.01.T01 |                                                                            |
| augustus-2-processed-gene-126.2-mRNA-1  | Japonica | NA       |               | Os02g0317200 | OsR498G0203551700.01.T01 | DUF295 domain-containing protein                                           |
| augustus-2-processed-gene-126.23-mRNA-1 | Japonica | NA       |               | Os02g0318200 | OsR498G0203556600.01.T01 | DUF295 domain-containing protein                                           |
| augustus-2-processed-gene-126.24-mRNA-1 | Japonica | NA       |               |              | OsR498G0203557200.01.T01 |                                                                            |
| augustus-2-processed-gene-126.25-mRNA-1 | Japonica | NA       |               | Os02g0318400 | OsR498G0203558200.01.T01 | F-box domain-containing protein                                            |
| augustus-2-processed-gene-126.8-mRNA-1  | Japonica | NA       |               | Os02g0317300 | OsR498G0203552200.01.T01 | Putative F-box/LRR-repeat protein 23                                       |
| augustus-2-processed-gene-128.15-mRNA-1 | Japonica | NA       |               | Os02g0321600 | OsR498G0203567500.01.T01 | CRAL-TRIO domain-containing protein                                        |
| augustus-2-processed-gene-130.24-mRNA-1 | Japonica | NA       |               |              |                          |                                                                            |
| augustus-2-processed-gene-130.25-mRNA-1 | Japonica | NA       |               |              | OsR498G1018240500.01.T04 |                                                                            |
| augustus-2-processed-gene-130.30-mRNA-1 | Japonica | NA       |               | Os02g0324400 | OsR498G0203578500.01.T01 | Inactive protein FON2 SPARE1                                               |
| augustus-2-processed-gene-130.43-mRNA-1 | Japonica | Japonica |               | Os02g0324500 | OsR498G0203579600.01.T01 | 40S ribosomal protein S7                                                   |
| augustus-2-processed-gene-132.17-mRNA-1 | Japonica | NA       |               | Os02g0327500 | OsR498G0203595100.01.T01 | Core-2/l-branching beta-1,6-N-acetylglucosaminyltransferase family protein |
| augustus-2-processed-gene-134.23-mRNA-1 | Japonica | NA       |               |              | OsR498G0203612200.01.T01 |                                                                            |
| augustus-2-processed-gene-136.12-mRNA-1 | Japonica | Indica   |               | Os02g0332700 | OsR498G0714227900.01.T02 |                                                                            |
| augustus-2-processed-gene-141.15-mRNA-1 | Japonica | NA       |               |              |                          |                                                                            |
| augustus-2-processed-gene-141.18-mRNA-1 | Japonica | NA       |               |              | OsR498G0203639100.01.T01 |                                                                            |
| augustus-2-processed-gene-142.27-mRNA-1 | Japonica | NA       |               |              | OsR498G1018048100.01.T01 | ATP-dependent DNA helicase                                                 |
| augustus-2-processed-gene-143.19-mRNA-1 | Japonica | NA       |               | Os02g0439700 | OsR498G0203652100.01.T01 | Translation initiation factor                                              |
| augustus-2-processed-gene-143.24-mRNA-1 | Japonica | NA       |               |              |                          | Transposon protein, putative, Mutator sub-class, expressed                 |
| augustus-2-processed-gene-146.33-mRNA-1 | Japonica | Japonica |               | Os02g0701833 | OsR498G1018968000.01.T01 | ATP-dependent DNA helicase                                                 |
| augustus-2-processed-gene-146.9-mRNA-1  | Japonica | NA       |               | Os12g0114500 | OsR498G1220846600.01.T01 | Non-specific lipid-transfer protein (Fragment)                             |
| augustus-2-processed-gene-147.12-mRNA-1 | Japonica | NA       |               | Os02g0448000 | OsR498G0203675100.01.T01 | AT-hook motif nuclear-localized protein 22                                 |
| augustus-2-processed-gene-147.2-mRNA-1  | Japonica | NA       |               |              |                          | Retrotransposon protein, putative, unclassified                            |
| augustus-2-processed-gene-148.16-mRNA-1 | Japonica | NA       |               | Os04g0574150 |                          | Exostosin domain-containing protein                                        |
| augustus-2-processed-gene-149.12-mRNA-1 | Japonica | NA       |               | Os02g0450000 | OsR498G0203686900.01.T01 | DUF659 domain-containing protein                                           |
| augustus-2-processed-gene-151.19-mRNA-1 | Japonica | NA       |               |              | OsR498G0305137000.01.T01 |                                                                            |
| augustus-2-processed-gene-151.22-mRNA-1 | Japonica | NA       |               |              | OsR498G1221513100.01.T01 | Hydroxyproline-rich glycoprotein-like                                      |
| augustus-2-processed-gene-152.24-mRNA-1 | Japonica | NA       |               | Os02g0452700 |                          |                                                                            |
| augustus-2-processed-gene-152.26-mRNA-1 | Japonica | NA       |               |              | OsR498G0203710000.01.T06 |                                                                            |
| augustus-2-processed-gene-153.1-mRNA-1  | Japonica | NA       |               | Os02g0454500 | OsR498G0203714300.01.T01 | Putative long-chain-alcohol O-fatty-acyltransferase 4                      |
| augustus-2-processed-gene-153.20-mRNA-1 | Japonica | NA       |               | Os02g0455400 | OsR498G0203719700.01.T01 |                                                                            |
| augustus-2-processed-gene-154.0-mRNA-1  | Japonica | NA       |               | Os02g0455800 | OsR498G0203720900.01.T01 | TF-B3 domain-containing protein                                            |
| augustus-2-processed-gene-154.1-mRNA-1  | Japonica | NA       |               |              | OsR498G0203721700.01.T01 | TF-B3 domain-containing protein                                            |
| augustus-2-processed-gene-154.19-mRNA-1 | Japonica | NA       | CC-LRR-NBS-TM | Os02g0456800 | OsR498G0203724300.01.T01 | Putative NB-ARC domain-containing protein (Fragment)                       |
| augustus-2-processed-gene-155.18-mRNA-1 | Japonica | Japonica |               | Os02g0458900 | OsR498G0613026600.01.T01 | GDSL esterase/lipase                                                       |
| augustus-2-processed-gene-155.27-mRNA-1 | Japonica | NA       |               |              |                          |                                                                            |
| augustus-2-processed-gene-156.10-mRNA-1 | Japonica | NA       | Kinase-TM     | Os02g0459600 | OsR498G0203737300.01.T03 | Non-specific serine/threonine protein kinase                               |
| augustus-2-processed-gene-156.30-mRNA-1 | Japonica | NA       |               |              | OsR498G0203737600.01.T01 | Putative Glutamate receptor 2 plant                                        |
| augustus-2-processed-gene-156.32-mRNA-1 | Japonica | NA       |               | Os02g0460200 | OsR498G0203738600.01.T01 | Flowering-promoting factor 1                                               |
| augustus-2-processed-gene-157.13-mRNA-1 | Japonica | NA       |               | Os02g0461200 |                          | Glucan endo-1,3-beta-D-glucosidase                                         |
| augustus-2-processed-gene-157.18-mRNA-1 | Japonica | NA       |               | Os02g0461500 | OsR498G0203744600.01.T01 | FAS1 domain-containing protein (Fragment)                                  |
| augustus-2-processed-gene-157.23-mRNA-1 | Japonica | NA       |               |              |                          |                                                                            |
| augustus-2-processed-gene-157.35-mRNA-1 | Japonica | NA       |               | Os02g0462200 | OsR498G0203746200.01.T01 |                                                                            |
| augustus-2-processed-gene-161.48-mRNA-1 | Japonica | NA       |               | Os02g0469900 | OsR498G0203776900.01.T02 | High mobility group B protein 15                                           |
| augustus-2-processed-gene-161.55-mRNA-1 | Japonica | Indica   |               | Os02g0470000 | OsR498G0203777200.01.T01 | Pentatricopeptide repeat-containing protein                                |
| augustus-2-processed-gene-164.28-mRNA-1 | Japonica | NA       |               | Os10g0489650 |                          |                                                                            |
| augustus-2-processed-gene-164.41-mRNA-1 | Japonica | NA       |               |              | OsR498G0203790200.01.T01 | BHLH domain-containing protein                                             |
| augustus-2-processed-gene-165.15-mRNA-1 | Japonica | NA       |               |              | OsR498G0203796800.01.T01 |                                                                            |
| augustus-2-processed-gene-166.8-mRNA-1  | Japonica | Japonica |               | Os02g0477401 | OsR498G0816166700.01.T02 | Exostosin domain-containing protein (Fragment)                             |
| augustus-2-processed-gene-174.15-mRNA-1 | Japonica | NA       |               | Os02g0491300 | OsR498G0203846900.01.T01 | Fasciclin-like arabinogalactan protein 21                                  |

|                                         |          |          |               |              |                          |                                                                          |
|-----------------------------------------|----------|----------|---------------|--------------|--------------------------|--------------------------------------------------------------------------|
| augustus-2-processed-gene-174.17-mRNA-1 | Japonica | NA       |               | Os02g0491800 | OsR498G0203848300.01.T01 |                                                                          |
| augustus-2-processed-gene-175.0-mRNA-1  | Japonica | NA       |               | Os06g0342750 | OsR498G1221118000.01.T01 | Putative transcription factor                                            |
| augustus-2-processed-gene-175.11-mRNA-1 | Japonica | NA       |               | Os02g0492500 |                          | DUF1618 domain-containing protein (Fragment)                             |
| augustus-2-processed-gene-176.40-mRNA-1 | Japonica | NA       |               | Os05g0225100 | OsR498G0510061500.01.T01 | DUF295 domain-containing protein                                         |
| augustus-2-processed-gene-178.20-mRNA-1 | Japonica | NA       |               |              | OsR498G0203863300.01.T01 | Transcriptional activator DEMETER                                        |
| augustus-2-processed-gene-179.17-mRNA-1 | Japonica | NA       |               |              |                          | Aldehyde oxygenase (deformylating)                                       |
| augustus-2-processed-gene-180.12-mRNA-1 | Japonica | NA       |               | Os02g0502500 | OsR498G0203880700.01.T01 | Calcium and calcium/calmodulin-dependent serine/threonine-protein kinase |
| augustus-2-processed-gene-184.15-mRNA-1 | Japonica | Japonica |               | Os02g0506600 | OsR498G0203894500.01.T02 | Chaperone protein dnaJ-related                                           |
| augustus-2-processed-gene-184.17-mRNA-1 | Japonica | NA       |               |              | OsR498G0203898100.01.T01 | Protein indeterminate-domain 16                                          |
| augustus-2-processed-gene-185.18-mRNA-1 | Japonica | NA       |               | Os02g0507600 | OsR498G0203900100.01.T01 | Argininosuccinate synthase (Fragment)                                    |
| augustus-2-processed-gene-185.21-mRNA-1 | Japonica | NA       |               |              | OsR498G0203900500.01.T01 |                                                                          |
| augustus-2-processed-gene-185.55-mRNA-1 | Japonica | Indica   |               | Os02g0212975 | OsR498G1019116500.01.T01 |                                                                          |
| augustus-2-processed-gene-192.23-mRNA-1 | Japonica | NA       |               | Os02g0518000 | OsR498G0203939200.01.T01 |                                                                          |
| augustus-2-processed-gene-194.41-mRNA-1 | Japonica | NA       |               | Os02g0521800 |                          |                                                                          |
| augustus-2-processed-gene-196.24-mRNA-1 | Japonica | NA       |               | Os02g0524500 |                          | Inhibitor of apoptosis-like protein                                      |
| augustus-2-processed-gene-2.18-mRNA-1   | Japonica | Indica   |               | Os10g0536100 | OsR498G0202808500.01.T03 | MADS box transcription factor 5                                          |
| augustus-2-processed-gene-2.4-mRNA-1    | Japonica | Indica   |               | Os02g0103500 | OsR498G0202807000.01.T01 | Auxin-induced protein 5NG4                                               |
| augustus-2-processed-gene-20.27-mRNA-1  | Japonica | NA       | LRR-TM        | Os02g0138000 | OsR498G0202928200.01.T01 | Leucine-rich repeat extensin-like protein 1                              |
| augustus-2-processed-gene-21.0-mRNA-1   | Japonica | NA       |               | Os02g0138600 | OsR498G0202932100.01.T01 |                                                                          |
| augustus-2-processed-gene-21.8-mRNA-1   | Japonica | NA       |               | Os02g0139100 | OsR498G0202933600.01.T01 | Chaperone binding ATPase activator                                       |
| augustus-2-processed-gene-21.9-mRNA-1   | Japonica | NA       |               | Os02g0139200 | OsR498G0202933800.01.T02 | Protein arginine N-methyltransferase                                     |
| augustus-2-processed-gene-210.25-mRNA-1 | Japonica | NA       |               | Os02g0548700 | OsR498G0204080800.01.T01 | RING-type E3 ubiquitin transferase                                       |
| augustus-2-processed-gene-212.41-mRNA-1 | Japonica | NA       |               | Os02g0551600 | OsR498G0204094500.01.T01 |                                                                          |
| augustus-2-processed-gene-213.14-mRNA-1 | Japonica | NA       |               |              | OsR498G0204103100.01.T05 | Histone-lysine N-methyltransferase ASHH2                                 |
| augustus-2-processed-gene-213.25-mRNA-1 | Japonica | Indica   |               | Os02g0554300 | OsR498G0204104000.01.T02 | SAC domain-containing protein                                            |
| augustus-2-processed-gene-213.6-mRNA-1  | Japonica | Indica   | Kinase-LRR-TM | Os01g0296000 | OsR498G0204100400.01.T01 | Putative LRR receptor-like serine/threonine-protein kinase               |
| augustus-2-processed-gene-214.15-mRNA-1 | Japonica | NA       |               | Os02g0555100 |                          | Pentatricopeptide repeat-containing protein                              |
| augustus-2-processed-gene-214.3-mRNA-1  | Japonica | NA       |               | Os02g0554800 | OsR498G0204106300.01.T01 |                                                                          |
| augustus-2-processed-gene-215.16-mRNA-1 | Japonica | Indica   |               | Os02g0557000 | OsR498G0204111500.01.T01 | Tubulin-folding cofactor C                                               |
| augustus-2-processed-gene-216.37-mRNA-1 | Japonica | Indica   |               | Os04g0549700 | OsR498G0204118400.01.T01 | Ethylene-responsive transcription factor ERF021                          |
| augustus-2-processed-gene-217.25-mRNA-1 | Japonica | NA       |               | Os02g0559800 | OsR498G0204121600.01.T01 | E3 ubiquitin-protein ligase EL5                                          |
| augustus-2-processed-gene-217.31-mRNA-1 | Japonica | NA       |               | Os02g0562100 | OsR498G0204123300.01.T02 | DNA repair protein XRCC                                                  |
| augustus-2-processed-gene-217.37-mRNA-1 | Japonica | NA       |               |              | OsR498G0305104500.01.T01 |                                                                          |
| augustus-2-processed-gene-217.51-mRNA-1 | Japonica | NA       |               | Os02g0563301 | OsR498G0204127000.01.T01 |                                                                          |
| augustus-2-processed-gene-218.50-mRNA-1 | Japonica | NA       |               | Os02g0564300 |                          | Copper ion transmembrane transporters                                    |
| augustus-2-processed-gene-218.52-mRNA-1 | Japonica | NA       |               |              | OsR498G0204131200.01.T01 | Transcription factor bHLH82                                              |
| augustus-2-processed-gene-218.55-mRNA-1 | Japonica | NA       |               | Os02g0565000 | OsR498G0204131600.01.T01 | Trihelix transcription factor                                            |
| augustus-2-processed-gene-218.57-mRNA-1 | Japonica | NA       |               | Os02g0565150 |                          |                                                                          |
| augustus-2-processed-gene-218.61-mRNA-1 | Japonica | NA       | Kinase-TM     | Os02g0565500 | OsR498G0204133200.01.T01 | Tyrosine-protein kinase                                                  |
| augustus-2-processed-gene-22.0-mRNA-1   | Japonica | NA       |               | Os02g0140300 | OsR498G0202938500.01.T01 | Molybdopterin synthase catalytic subunit                                 |
| augustus-2-processed-gene-22.18-mRNA-1  | Japonica | Japonica |               | Os02g0141400 | OsR498G0202944000.01.T01 | Arginyl-tRNA synthetase                                                  |
| augustus-2-processed-gene-22.6-mRNA-1   | Japonica | NA       |               | Os02g0140800 | OsR498G0202940300.01.T01 | Mitochondrial transcription termination factor family protein            |
| augustus-2-processed-gene-220.14-mRNA-1 | Japonica | NA       |               | Os02g0569000 | OsR498G0204143300.01.T01 | Oryzaalexin E synthase                                                   |
| augustus-2-processed-gene-221.21-mRNA-1 | Japonica | NA       |               | Os02g0569900 | OsR498G0204146300.01.T01 | Oryzaalexin D synthase                                                   |
| augustus-2-processed-gene-221.8-mRNA-1  | Japonica | NA       |               | Os02g0569400 | OsR498G0204145300.01.T01 | Oryzaalexin D synthase                                                   |
| augustus-2-processed-gene-223.24-mRNA-1 | Japonica | NA       |               | Os02g0571900 | OsR498G0204154400.01.T01 | Oryzaalexin E synthase                                                   |
| augustus-2-processed-gene-223.38-mRNA-1 | Japonica | Indica   |               | Os02g0572350 | OsR498G0204155600.01.T01 | RING-H2 finger protein ATL51                                             |
| augustus-2-processed-gene-224.14-mRNA-1 | Japonica | NA       |               |              | OsR498G0204164700.01.T01 | Putative ETHYLENE INSENSITIVE 3-like 4 protein isoform X1                |
| augustus-2-processed-gene-224.15-mRNA-1 | Japonica | NA       |               | Os02g0574900 | OsR498G0204164900.01.T01 | F-box/kelch-repeat protein Atlg22040                                     |
| augustus-2-processed-gene-224.24-mRNA-1 | Japonica | NA       |               |              | OsR498G0204164600.01.T01 |                                                                          |
| augustus-2-processed-gene-225.20-mRNA-1 | Japonica | NA       |               | Os02g0575700 | OsR498G0204166900.01.T01 | Putative WRKY transcription factor 19                                    |
| augustus-2-processed-gene-225.22-mRNA-1 | Japonica | NA       |               | Os02g0575900 | OsR498G0204167700.01.T01 |                                                                          |
| augustus-2-processed-gene-225.26-mRNA-1 | Japonica | NA       |               |              |                          |                                                                          |
| augustus-2-processed-gene-225.36-mRNA-1 | Japonica | NA       |               | Os10g0531750 | OsR498G0408675500.01.T01 | Retrotransposon protein, putative, Ty3-gypsy sub-class                   |
| augustus-2-processed-gene-227.26-mRNA-1 | Japonica | NA       |               |              | OsR498G0204046800.01.T01 | Circumsporozoite protein-like                                            |
| augustus-2-processed-gene-227.49-mRNA-1 | Japonica | Japonica |               | Os02g0580500 | OsR498G0408710600.01.T03 | Prohibitin                                                               |
| augustus-2-processed-gene-229.20-mRNA-1 | Japonica | NA       |               | Os11g0519100 |                          |                                                                          |
| augustus-2-processed-gene-229.23-mRNA-1 | Japonica | NA       |               | Os02g0582800 | OsR498G0204189200.01.T01 |                                                                          |
| augustus-2-processed-gene-229.26-mRNA-1 | Japonica | NA       |               | Os02g0583400 |                          |                                                                          |
| augustus-2-processed-gene-229.38-mRNA-1 | Japonica | NA       |               | Os03g0204201 | OsR498G0408675500.01.T01 | Retrotransposon protein, putative, Ty3-gypsy sub-class                   |
| augustus-2-processed-gene-229.53-mRNA-1 | Japonica | NA       |               | Os02g0585200 | OsR498G0204193200.01.T01 | HMA domain-containing protein                                            |



|                                         |          |          |               |              |                          |                                                            |
|-----------------------------------------|----------|----------|---------------|--------------|--------------------------|------------------------------------------------------------|
| augustus-2-processed-gene-23.24-mRNA-1  | Japonica | Indica   |               | Os02g0144800 | OsR498G0202945800.01.T01 |                                                            |
| augustus-2-processed-gene-230.0-mRNA-1  | Japonica | NA       |               | Os02g0586400 | OsR498G0204196300.01.T01 | Ras-related protein Rab-2-B                                |
| augustus-2-processed-gene-235.0-mRNA-1  | Japonica | NA       |               | Os02g0595200 |                          |                                                            |
| augustus-2-processed-gene-235.10-mRNA-1 | Japonica | NA       |               | Os02g0595700 | OsR498G0204234900.01.T01 | Elongation factor Tu                                       |
| augustus-2-processed-gene-235.12-mRNA-1 | Japonica | NA       |               | Os02g0596200 | OsR498G0204236900.01.T01 | Mannan endo-1,4-beta-mannosidase                           |
| augustus-2-processed-gene-235.13-mRNA-1 | Japonica | Indica   |               | Os02g0596200 | OsR498G0204236900.01.T01 | Mannan endo-1,4-beta-mannosidase                           |
| augustus-2-processed-gene-235.4-mRNA-1  | Japonica | NA       |               | Os02g0595400 | OsR498G0204234200.01.T01 | Coiled-coil domain-containing protein 86                   |
| augustus-2-processed-gene-238.18-mRNA-1 | Japonica | NA       |               | Os02g0604100 | OsR498G0204259500.01.T01 |                                                            |
| augustus-2-processed-gene-238.2-mRNA-1  | Japonica | NA       |               |              | OsR498G0204253500.01.T01 | Transcription termination factor like                      |
| augustus-2-processed-gene-238.26-mRNA-1 | Japonica | NA       | Kinase-TM     | Os02g0603000 | OsR498G0204255800.01.T01 | Serine/threonine-protein kinase OX11                       |
| augustus-2-processed-gene-238.27-mRNA-1 | Japonica | NA       | LRR-TM        | Os02g0603100 | OsR498G0204256200.01.T01 | Leucine-rich repeat receptor-like protein CLAVATA2         |
| augustus-2-processed-gene-238.28-mRNA-1 | Japonica | NA       |               |              | OsR498G0203722500.01.T01 | Cytokinin inducible protein-like                           |
| augustus-2-processed-gene-238.31-mRNA-1 | Japonica | Japonica |               | Os02g0604000 | OsR498G0204259400.01.T01 | SGNH hydrolase-type esterase superfamily protein, putative |
| augustus-2-processed-gene-238.9-mRNA-1  | Japonica | Indica   |               | Os02g0602500 | OsR498G0204253800.01.T01 | Pre-mRNA-splicing factor ISY1                              |
| augustus-2-processed-gene-239.45-mRNA-1 | Japonica | NA       |               |              | OsR498G0204263100.01.T01 | Protein-serine/threonine phosphatase                       |
| augustus-2-processed-gene-239.59-mRNA-1 | Japonica | Japonica |               | Os02g0605000 | OsR498G0204264300.01.T01 | Cyclin N-terminal domain-containing protein (Fragment)     |
| augustus-2-processed-gene-239.61-mRNA-1 | Japonica | Japonica |               | Os02g0605400 | OsR498G0204265100.01.T04 | VAS1 domain-containing protein                             |
| augustus-2-processed-gene-240.35-mRNA-1 | Japonica | Indica   |               | Os02g0606900 | OsR498G0204270600.01.T03 | Protein-serine/threonine phosphatase                       |
| augustus-2-processed-gene-240.36-mRNA-1 | Japonica | NA       |               | Os02g0605000 | OsR498G0204270800.01.T01 | Cyclin N-terminal domain-containing protein (Fragment)     |
| augustus-2-processed-gene-241.31-mRNA-1 | Japonica | Indica   |               | Os02g0608600 | OsR498G0204275900.01.T01 | Acetohydroxy-acid synthase small subunit                   |
| augustus-2-processed-gene-241.38-mRNA-1 | Japonica | NA       |               | Os02g0608801 | OsR498G0204276600.01.T01 | Acetylmalan esterase-like                                  |
| augustus-2-processed-gene-241.48-mRNA-1 | Japonica | NA       | LRR-TM        | Os02g0609900 |                          | Receptor-like protein kinase                               |
| augustus-2-processed-gene-242.0-mRNA-1  | Japonica | NA       | LRR-TM        |              | OsR498G0204282100.01.T01 | Protein kinase domain-containing protein (Fragment)        |
| augustus-2-processed-gene-243.34-mRNA-1 | Japonica | NA       |               |              | OsR498G0204288300.01.T01 | GrpE protein homolog                                       |
| augustus-2-processed-gene-243.41-mRNA-1 | Japonica | NA       |               | Os02g0612200 |                          | RRM domain-containing protein                              |
| augustus-2-processed-gene-244.8-mRNA-1  | Japonica | Indica   |               | Os02g0613900 | OsR498G0204296100.01.T03 | Adenine phosphoribosyltransferase                          |
| augustus-2-processed-gene-254.39-mRNA-1 | Japonica | NA       |               | Os02g0620500 | OsR498G0204334300.01.T01 | Ammonium transporter                                       |
| augustus-2-processed-gene-254.41-mRNA-1 | Japonica | NA       |               | Os02g0620600 | OsR498G0204334900.01.T01 | Ammonium transporter                                       |
| augustus-2-processed-gene-254.52-mRNA-1 | Japonica | NA       |               |              | OsR498G0204332400.01.T01 |                                                            |
| augustus-2-processed-gene-254.53-mRNA-1 | Japonica | NA       |               | Os02g0620800 | OsR498G0204335200.01.T04 | Pentatricopeptide repeat-containing protein                |
| augustus-2-processed-gene-255.5-mRNA-1  | Japonica | Indica   |               | Os02g0621800 | OsR498G0204338000.01.T02 | Long-chain-alcohol oxidase                                 |
| augustus-2-processed-gene-256.29-mRNA-1 | Japonica | Indica   |               | Os10g0460000 | OsR498G0204348500.01.T01 |                                                            |
| augustus-2-processed-gene-256.35-mRNA-1 | Japonica | Japonica |               | Os02g0625100 | OsR498G0204350100.01.T01 | Pentatricopeptide repeat-containing protein, chloroplastic |
| augustus-2-processed-gene-257.1-mRNA-1  | Japonica | Japonica | CC-Kinase-TM  | Os02g0625300 | OsR498G0204350900.01.T01 | Phosphoenolpyruvate carboxylase kinase                     |
| augustus-2-processed-gene-257.31-mRNA-1 | Japonica | Japonica |               | Os02g0626600 | OsR498G0204355400.01.T01 | Phenylalanine ammonia-lyase                                |
| augustus-2-processed-gene-258.32-mRNA-1 | Japonica | NA       |               |              | OsR498G0204357400.01.T01 |                                                            |
| augustus-2-processed-gene-259.0-mRNA-1  | Japonica | NA       |               |              |                          | UDP-glucuronic acid/UDP-N-acetylgalactosamine transporter  |
| augustus-2-processed-gene-259.22-mRNA-1 | Japonica | NA       |               | Os02g0629000 | OsR498G0204363000.01.T01 | Senescence regulator                                       |
| augustus-2-processed-gene-259.25-mRNA-1 | Japonica | NA       | Kinase-LRR-TM | Os02g0629400 | OsR498G0204364800.01.T01 | Phytosulfokine receptor 1                                  |
| augustus-2-processed-gene-259.26-mRNA-1 | Japonica | NA       |               | Os08g0114000 | OsR498G0204365600.01.T01 | T-complex protein 1 subunit eta                            |
| augustus-2-processed-gene-260.21-mRNA-1 | Japonica | NA       |               | Os02g0631100 | OsR498G0204370100.01.T03 |                                                            |
| augustus-2-processed-gene-262.64-mRNA-1 | Japonica | NA       |               | Os02g0634500 | OsR498G0204382100.01.T04 | ATP-dependent Clp protease proteolytic subunit             |
| augustus-2-processed-gene-262.79-mRNA-1 | Japonica | NA       |               |              | OsR498G0204381000.01.T01 | Putative protein phosphatase 2C 23                         |
| augustus-2-processed-gene-262.80-mRNA-1 | Japonica | NA       |               |              | OsR498G0204381600.01.T01 | Putative protein phosphatase 2C 24                         |
| augustus-2-processed-gene-263.17-mRNA-1 | Japonica | NA       |               | Os02g0636300 | OsR498G0204386000.01.T01 | DEAD-box ATP-dependent RNA helicase                        |
| augustus-2-processed-gene-264.29-mRNA-1 | Japonica | NA       |               | Os02g0639800 | OsR498G0204397200.01.T01 | E3 ubiquitin-protein ligase RMA1                           |
| augustus-2-processed-gene-264.4-mRNA-1  | Japonica | NA       |               | Os02g0638300 | OsR498G0204392200.01.T03 | Ferredoxin-thioredoxin reductase, variable chain           |
| augustus-2-processed-gene-264.6-mRNA-1  | Japonica | NA       |               | Os02g0638650 | OsR498G0204392800.01.T01 | Ethylene-responsive transcription factor ERF053            |
| augustus-2-processed-gene-265.32-mRNA-1 | Japonica | NA       |               | Os02g0639900 | OsR498G0204397600.01.T01 | Chloroplast thioredoxin M-type 2                           |
| augustus-2-processed-gene-265.40-mRNA-1 | Japonica | NA       |               | Os02g0640700 | OsR498G0204400100.01.T01 | Plant UBX domain-containing protein 7                      |
| augustus-2-processed-gene-265.58-mRNA-1 | Japonica | NA       | Kinase-TM     | Os02g0640500 | OsR498G0204399600.01.T01 | L-type lectin-domain containing receptor kinase IV.2       |
| augustus-2-processed-gene-266.17-mRNA-1 | Japonica | Japonica |               | Os02g0643800 | OsR498G0204410500.01.T01 | Auxin-responsive protein SAUR36                            |
| augustus-2-processed-gene-267.39-mRNA-1 | Japonica | NA       |               |              | OsR498G0204414300.01.T05 | Pentatricopeptide repeat-containing protein mitochondrial  |
| augustus-2-processed-gene-267.45-mRNA-1 | Japonica | Indica   |               | Os02g0644200 | OsR498G0204412400.01.T01 | Vacuolar iron transporter like                             |
| augustus-2-processed-gene-268.23-mRNA-1 | Japonica | NA       |               |              | OsR498G0204417500.01.T01 | Nucleolin 2 (Fragment)                                     |
| augustus-2-processed-gene-268.30-mRNA-1 | Japonica | Indica   |               | Os02g0646900 | OsR498G0204419300.01.T01 | Polyamine oxidase 1                                        |
| augustus-2-processed-gene-268.32-mRNA-1 | Japonica | Indica   |               | Os01g0346700 | OsR498G0204419500.01.T01 | Ccr4-not complex subunit mot2                              |
| augustus-2-processed-gene-27.57-mRNA-1  | Japonica | NA       |               | Os02g0148600 | OsR498G0202973900.01.T01 |                                                            |
| augustus-2-processed-gene-271.53-mRNA-1 | Japonica | NA       |               |              |                          |                                                            |
| augustus-2-processed-gene-272.16-mRNA-1 | Japonica | NA       |               | Os02g0655200 | OsR498G0204444300.01.T01 | Ethylene-responsive transcription factor 5                 |
| augustus-2-processed-gene-272.26-mRNA-1 | Japonica | NA       |               | Os02g0655300 | OsR498G0204445200.01.T02 | LeuD                                                       |

|                                         |          |          |                |              |                          |                                                           |
|-----------------------------------------|----------|----------|----------------|--------------|--------------------------|-----------------------------------------------------------|
| augustus-2-processed-gene-272.8-mRNA-1  | Japonica | NA       |                | Os02g0654700 | OsR498G0204443200.01.T01 | Ethylene-responsive factor                                |
| augustus-2-processed-gene-273.34-mRNA-1 | Japonica | NA       |                | Os02g0656600 | OsR498G0204448900.01.T01 | Ethylene-responsive transcription factor TINY-like        |
| augustus-2-processed-gene-273.35-mRNA-1 | Japonica | NA       |                | Os02g0657000 | OsR498G0204450900.01.T01 | Ethylene-responsive transcription factor ERF034           |
| augustus-2-processed-gene-274.15-mRNA-1 | Japonica | NA       |                | Os02g0659100 | OsR498G0204458500.01.T01 | Zinc finger protein ZAT2                                  |
| augustus-2-processed-gene-274.18-mRNA-1 | Japonica | NA       |                | Os02g0659500 | OsR498G0204460300.01.T01 | Zinc finger protein ZAT4                                  |
| augustus-2-processed-gene-274.9-mRNA-1  | Japonica | NA       |                |              |                          | Remorin, C-terminal                                       |
| augustus-2-processed-gene-275.17-mRNA-1 | Japonica | NA       |                | Os02g0659600 | OsR498G0204461300.01.T01 |                                                           |
| augustus-2-processed-gene-275.45-mRNA-1 | Japonica | NA       |                | Os02g0661300 | OsR498G0204465000.01.T03 | DOG1 domain-containing protein (Fragment)                 |
| augustus-2-processed-gene-276.22-mRNA-1 | Japonica | NA       |                | Os02g0662000 | OsR498G0204467700.01.T01 | Proline-rich protein DC2.15                               |
| augustus-2-processed-gene-276.23-mRNA-1 | Japonica | NA       |                | Os02g0662100 | OsR498G0204468300.01.T01 | 14 kDa polypeptide                                        |
| augustus-2-processed-gene-276.30-mRNA-1 | Japonica | Indica   |                | Os02g0662700 | OsR498G0204470900.01.T01 | Scarecrow-like protein 6                                  |
| augustus-2-processed-gene-276.32-mRNA-1 | Japonica | NA       |                | Os02g0663100 | OsR498G0204471300.01.T01 | GRAS transcription factor                                 |
| augustus-2-processed-gene-277.46-mRNA-1 | Japonica | NA       |                |              | OsR498G0509838600.01.T01 | HGWP repeat containing protein-like                       |
| augustus-2-processed-gene-277.48-mRNA-1 | Japonica | NA       |                |              | OsR498G0204474000.01.T01 | C2 domain-containing protein                              |
| augustus-2-processed-gene-277.54-mRNA-1 | Japonica | NA       |                | Os02g0664000 | OsR498G0204474300.01.T01 | Glutathione peroxidase                                    |
| augustus-2-processed-gene-278.30-mRNA-1 | Japonica | NA       |                | Os02g0665300 | OsR498G0204477900.01.T01 | Subtilisin-like serine protease                           |
| augustus-2-processed-gene-278.42-mRNA-1 | Japonica | NA       |                | Os02g0666700 |                          | Purine-cytosine permease                                  |
| augustus-2-processed-gene-278.52-mRNA-1 | Japonica | NA       |                | Os02g0666500 | OsR498G0204480600.01.T02 | Cytochrome P450, E-class, group I                         |
| augustus-2-processed-gene-279.23-mRNA-1 | Japonica | Japonica |                | Os02g0667701 | OsR498G0204484100.01.T01 |                                                           |
| augustus-2-processed-gene-279.35-mRNA-1 | Japonica | NA       |                | Os02g0668100 | OsR498G0204485000.01.T02 | Chloroplast geranyl diphosphate synthase small subunit II |
| augustus-2-processed-gene-279.40-mRNA-1 | Japonica | NA       |                | Os02g0668200 |                          |                                                           |
| augustus-2-processed-gene-279.44-mRNA-1 | Japonica | Indica   |                | Os04g0562500 | OsR498G0204490700.01.T01 |                                                           |
| augustus-2-processed-gene-279.45-mRNA-1 | Japonica | NA       |                |              | OsR498G0204490900.01.T01 |                                                           |
| augustus-2-processed-gene-279.54-mRNA-1 | Japonica | Indica   |                | Os02g0111900 | OsR498G0204487800.01.T01 | DUF295 domain-containing protein                          |
| augustus-2-processed-gene-28.25-mRNA-1  | Japonica | Indica   |                | Os02g0149500 | OsR498G0202976900.01.T01 | Peptidase C32 domain-containing protein                   |
| augustus-2-processed-gene-28.33-mRNA-1  | Japonica | Indica   |                | Os02g0149700 | OsR498G0202977600.01.T03 | Exocyst subunit Exo70 family protein (Fragment)           |
| augustus-2-processed-gene-28.42-mRNA-1  | Japonica | NA       | Kinase-LRR-NBS |              |                          | Disease resistance protein RGA2                           |
| augustus-2-processed-gene-28.53-mRNA-1  | Japonica | NA       |                | Os02g0150000 | OsR498G0202979600.01.T01 |                                                           |
| augustus-2-processed-gene-280.27-mRNA-1 | Japonica | NA       |                | Os02g0670900 | OsR498G0204494100.01.T03 | Lysine histidine transporter-like 3                       |
| augustus-2-processed-gene-280.39-mRNA-1 | Japonica | NA       |                |              | OsR498G0204046800.01.T01 | Epstein-Barr virus EBNA-1-like                            |
| augustus-2-processed-gene-281.52-mRNA-1 | Japonica | NA       |                | Os02g0672500 | OsR498G0204501000.01.T01 | Mitochondrial inner membrane translocase subunit          |
| augustus-2-processed-gene-282.9-mRNA-1  | Japonica | Indica   |                | Os02g0673700 | OsR498G0204506800.01.T01 | Dof zinc finger protein 2                                 |
| augustus-2-processed-gene-283.14-mRNA-1 | Japonica | Japonica |                | Os02g0676400 | OsR498G0204516700.01.T01 | Protein DETOXIFICATION                                    |
| augustus-2-processed-gene-283.6-mRNA-1  | Japonica | NA       |                |              | OsR498G0204046800.01.T01 | Epstein-Barr virus EBNA-1-like                            |
| augustus-2-processed-gene-284.1-mRNA-1  | Japonica | NA       |                | Os02g0676800 | OsR498G0204519700.01.T01 | Ethylene-responsive transcription factor ERF025           |
| augustus-2-processed-gene-284.11-mRNA-1 | Japonica | NA       |                | Os02g0677300 | OsR498G0204522100.01.T01 | C-repeats binding factor 4                                |
| augustus-2-processed-gene-285.12-mRNA-1 | Japonica | NA       |                | Os02g0679700 | OsR498G0204528100.01.T01 | Transcription repressor                                   |
| augustus-2-processed-gene-285.30-mRNA-1 | Japonica | Indica   |                | Os02g0559800 | OsR498G0204527400.01.T01 | E3 ubiquitin-protein ligase EL5                           |
| augustus-2-processed-gene-285.31-mRNA-1 | Japonica | NA       |                |              |                          | Transposon protein CACTA, En/Spm sub-class                |
| augustus-2-processed-gene-286.35-mRNA-1 | Japonica | NA       |                | Os02g0681632 | OsR498G0204533500.01.T01 | Serine/threonine receptor-like kinase NFP                 |
| augustus-2-processed-gene-286.46-mRNA-1 | Japonica | NA       |                | Os02g0681900 | OsR498G0204535200.01.T01 | GRAS domain-containing protein (Fragment)                 |
| augustus-2-processed-gene-287.15-mRNA-1 | Japonica | NA       |                | Os02g0684000 | OsR498G0204544300.01.T02 | Protein SLOW GREEN 1, chloroplastic                       |
| augustus-2-processed-gene-287.23-mRNA-1 | Japonica | NA       |                | Os02g0683500 | OsR498G0204540600.01.T02 | ABI3VP1 transcription factor                              |
| augustus-2-processed-gene-287.24-mRNA-1 | Japonica | NA       |                | Os02g0684100 |                          | Sulfotransferase                                          |
| augustus-2-processed-gene-287.25-mRNA-1 | Japonica | NA       |                |              | OsR498G0204544800.01.T01 | tRNA-splicing endonuclease positive effector-like         |
| augustus-2-processed-gene-287.4-mRNA-1  | Japonica | NA       |                | Os02g0682500 | OsR498G0204537800.01.T02 | Transparent testa                                         |
| augustus-2-processed-gene-288.25-mRNA-1 | Japonica | NA       |                | Os02g0684500 | OsR498G0204546200.01.T01 | Multifunctional fusion protein                            |
| augustus-2-processed-gene-288.49-mRNA-1 | Japonica | NA       |                | Os02g0686100 | OsR498G0204552000.01.T01 | RING-H2 finger protein ATL1R                              |
| augustus-2-processed-gene-289.33-mRNA-1 | Japonica | NA       |                |              | OsR498G0204553600.01.T01 |                                                           |
| augustus-2-processed-gene-290.24-mRNA-1 | Japonica | NA       |                | Os02g0688200 |                          | PMEL domain-containing protein (Fragment)                 |
| augustus-2-processed-gene-290.34-mRNA-1 | Japonica | NA       |                |              |                          |                                                           |
| augustus-2-processed-gene-290.41-mRNA-1 | Japonica | NA       |                | Os02g0688800 | OsR498G0204564700.01.T01 | E3 ubiquitin-protein ligase ATL4                          |
| augustus-2-processed-gene-290.53-mRNA-1 | Japonica | NA       |                |              |                          | AAA domain-containing protein                             |
| augustus-2-processed-gene-290.58-mRNA-1 | Japonica | NA       |                | Os02g0689500 | OsR498G0204567600.01.T02 |                                                           |
| augustus-2-processed-gene-291.32-mRNA-1 | Japonica | NA       |                | Os02g0690200 | OsR498G0204571100.01.T02 | Proton-dependent oligopeptide transport family protein    |
| augustus-2-processed-gene-291.33-mRNA-1 | Japonica | NA       |                | Os02g0690500 | OsR498G0204571900.01.T01 | PPM-type phosphatase domain-containing protein (Fragment) |
| augustus-2-processed-gene-291.34-mRNA-1 | Japonica | NA       |                | Os02g0690600 | OsR498G0204572100.01.T01 | RING-type E3 ubiquitin transferase                        |
| augustus-2-processed-gene-292.16-mRNA-1 | Japonica | NA       |                | Os02g0693000 |                          |                                                           |
| augustus-2-processed-gene-292.9-mRNA-1  | Japonica | NA       |                | Os02g0692000 | OsR498G0204575600.01.T01 | Putative RING-H2 finger protein ATL53                     |
| augustus-2-processed-gene-293.65-mRNA-1 | Japonica | Japonica |                | Os02g0695700 | OsR498G0409312500.01.T01 | DNA repair protein like                                   |
| augustus-2-processed-gene-295.63-mRNA-1 | Japonica | NA       |                | Os02g0699600 | OsR498G0204598300.01.T02 | 60S ribosomal protein L12                                 |

|                                         |          |          |        |              |                          |                                                                                   |
|-----------------------------------------|----------|----------|--------|--------------|--------------------------|-----------------------------------------------------------------------------------|
| augustus-2-processed-gene-296.27-mRNA-1 | Japonica | NA       |        | Os02g0700500 | OsR498G0204600800.01.T01 | Polyamine transporter                                                             |
| augustus-2-processed-gene-297.11-mRNA-1 | Japonica | NA       |        |              | OsR498G1018968000.01.T01 | ATP-dependent DNA helicase                                                        |
| augustus-2-processed-gene-297.12-mRNA-1 | Japonica | NA       |        | Os02g0702100 |                          | Transcription factor                                                              |
| augustus-2-processed-gene-297.26-mRNA-1 | Japonica | NA       |        | Os02g0703300 | OsR498G0204609700.01.T01 |                                                                                   |
| augustus-2-processed-gene-298.32-mRNA-1 | Japonica | NA       |        |              |                          | Ribosomal protein (Fragment)                                                      |
| augustus-2-processed-gene-298.33-mRNA-1 | Japonica | NA       |        | Os02g0703800 | OsR498G0204612000.01.T01 | DUF295 domain-containing protein                                                  |
| augustus-2-processed-gene-298.47-mRNA-1 | Japonica | Japonica |        | Os02g0704000 | OsR498G1221463200.01.T01 | Carotenoid cleavage dioxygenase                                                   |
| augustus-2-processed-gene-3.48-mRNA-1   | Japonica | NA       |        | Os02g0105200 | OsR498G0202813500.01.T05 | Dihydrolipoamide acetyltransferase component of pyruvate dehydrogenase            |
| augustus-2-processed-gene-3.67-mRNA-1   | Japonica | NA       |        | Os02g0105800 | OsR498G0202815200.01.T04 | FBD domain-containing protein                                                     |
| augustus-2-processed-gene-3.71-mRNA-1   | Japonica | NA       |        | Os02g0106300 | OsR498G0202817800.01.T05 | Putative tetratricopeptide-like helical domain, DYW domain-containing protein     |
| augustus-2-processed-gene-300.0-mRNA-1  | Japonica | NA       |        | Os02g0706400 | OsR498G0204619500.01.T03 | Transcription factor RADIALIS                                                     |
| augustus-2-processed-gene-300.10-mRNA-1 | Japonica | NA       |        | Os02g0708000 |                          | BED-type domain-containing protein                                                |
| augustus-2-processed-gene-300.6-mRNA-1  | Japonica | NA       |        | Os02g0706600 | OsR498G0204620600.01.T04 | Zinc-finger homeodomain protein 7                                                 |
| augustus-2-processed-gene-300.9-mRNA-1  | Japonica | NA       |        |              | OsR498G0204624500.01.T01 |                                                                                   |
| augustus-2-processed-gene-301.16-mRNA-1 | Japonica | NA       |        | Os02g0709300 | OsR498G0204629800.01.T01 | Histidinol-phosphate aminotransferase, chloroplastic                              |
| augustus-2-processed-gene-302.24-mRNA-1 | Japonica | NA       |        | Os02g0711100 |                          | Pentatricopeptide repeat-containing protein, mitochondrial                        |
| augustus-2-processed-gene-303.37-mRNA-1 | Japonica | NA       |        | Os05g0346800 | OsR498G0102644000.01.T01 | LOB domain-containing protein 12                                                  |
| augustus-2-processed-gene-303.38-mRNA-1 | Japonica | NA       |        |              | OsR498G0204642900.01.T01 | Cytochrome b561/ferric reductase transmembrane                                    |
| augustus-2-processed-gene-304.10-mRNA-1 | Japonica | NA       |        |              |                          | Trafficking protein particle complex subunit 11                                   |
| augustus-2-processed-gene-305.27-mRNA-1 | Japonica | NA       |        | Os02g0717200 | OsR498G0204654900.01.T03 | Rho GTPase-activating gacO-like protein                                           |
| augustus-2-processed-gene-306.38-mRNA-1 | Japonica | NA       |        | Os02g0717700 | OsR498G0204657300.01.T02 | Glucosamine 6-phosphate N-acetyltransferase                                       |
| augustus-2-processed-gene-306.39-mRNA-1 | Japonica | NA       |        | Os02g0718000 |                          | LIM domain-containing serine/threonine-protein kinase                             |
| augustus-2-processed-gene-306.62-mRNA-1 | Japonica | NA       |        | Os02g0719800 | OsR498G0204662500.01.T03 | Homogentisate 1,2-dioxygenase                                                     |
| augustus-2-processed-gene-307.43-mRNA-1 | Japonica | NA       |        | Os02g0720400 | OsR498G0204663700.01.T01 |                                                                                   |
| augustus-2-processed-gene-307.53-mRNA-1 | Japonica | NA       |        | Os02g0789700 | OsR498G1120753400.01.T01 |                                                                                   |
| augustus-2-processed-gene-308.12-mRNA-1 | Japonica | Japonica |        | Os02g0723200 | OsR498G1120322800.01.T01 | Galactomannan galactosyltransferase                                               |
| augustus-2-processed-gene-309.50-mRNA-1 | Japonica | Japonica |        | Os02g0724100 | OsR498G0204681800.01.T01 | Myb-like transcription factor-like                                                |
| augustus-2-processed-gene-309.58-mRNA-1 | Japonica | NA       |        | Os02g0725200 | OsR498G0204683700.01.T02 | Ribulose-1,5 bisphosphate carboxylase/oxygenase large subunit N-methyltransferase |
| augustus-2-processed-gene-31.36-mRNA-1  | Japonica | NA       | LRR-TM | Os02g0156400 | OsR498G0202998000.01.T01 | Putative Phytosulfokine receptor                                                  |
| augustus-2-processed-gene-310.3-mRNA-1  | Japonica | NA       |        | Os02g0726000 | OsR498G0204687000.01.T01 | Fasciclin-like arabinogalactan protein 2                                          |
| augustus-2-processed-gene-310.4-mRNA-1  | Japonica | NA       |        | Os02g0726300 | OsR498G0204687800.01.T01 | Dof zinc finger protein like                                                      |
| augustus-2-processed-gene-311.20-mRNA-1 | Japonica | Indica   |        | Os06g0271600 | OsR498G0204702700.01.T01 | E3 ubiquitin-protein ligase ATL15                                                 |
| augustus-2-processed-gene-311.21-mRNA-1 | Japonica | NA       |        | Os02g0729900 | OsR498G0204702900.01.T01 | RING-H2 finger protein ATL1M                                                      |
| augustus-2-processed-gene-311.8-mRNA-1  | Japonica | Indica   |        | Os03g0351300 | OsR498G0204693600.01.T01 | Beta-amylase                                                                      |
| augustus-2-processed-gene-312.0-mRNA-1  | Japonica | NA       |        | Os02g0730300 | OsR498G0204704700.01.T04 | Potassium transporter                                                             |
| augustus-2-processed-gene-312.18-mRNA-1 | Japonica | NA       |        | Os02g0731900 | OsR498G0204710500.01.T01 | Very-long-chain 3-oxoacyl-CoA synthase                                            |
| augustus-2-processed-gene-312.26-mRNA-1 | Japonica | NA       |        | Os02g0730900 |                          | Pentatricopeptide repeat-containing protein chloroplastic                         |
| augustus-2-processed-gene-313.10-mRNA-1 | Japonica | NA       |        | Os02g0732500 | OsR498G0204713000.01.T03 | ADP-ribosylation factor-like protein 8c isoform A                                 |
| augustus-2-processed-gene-313.26-mRNA-1 | Japonica | NA       |        | Os02g0733500 | OsR498G0204717000.01.T02 | Probable calcium-binding protein CML20                                            |
| augustus-2-processed-gene-314.13-mRNA-1 | Japonica | Indica   |        | Os02g0734900 | OsR498G0204722100.01.T01 | Endoplasmic reticulum transmembrane protein (Fragment)                            |
| augustus-2-processed-gene-314.16-mRNA-1 | Japonica | Indica   |        | Os03g0589100 | OsR498G0204724500.01.T01 | Retrotransposon protein, putative, Ty3-gypsy sub-class                            |
| augustus-2-processed-gene-316.47-mRNA-1 | Japonica | NA       |        | Os02g0739400 | OsR498G0204738600.01.T01 | Hexosyltransferase                                                                |
| augustus-2-processed-gene-317.49-mRNA-1 | Japonica | NA       |        | Os02g0740700 | OsR498G0204744400.01.T01 | Metalloendoproteinase 2-MMP                                                       |
| augustus-2-processed-gene-318.5-mRNA-1  | Japonica | Indica   |        | Os02g0742000 | OsR498G0204748700.01.T01 | BAH and coiled-coil domain-containing protein 1                                   |
| augustus-2-processed-gene-319.0-mRNA-1  | Japonica | NA       |        | Os02g0742700 | OsR498G0204750500.01.T01 | protein RICE SALT SENSITIVE 3                                                     |
| augustus-2-processed-gene-319.4-mRNA-1  | Japonica | NA       |        |              | OsR498G0204752800.01.T01 | Retrotransposon protein, putative, unclassified                                   |
| augustus-2-processed-gene-319.8-mRNA-1  | Japonica | Japonica |        | Os02g0743100 | OsR498G0204753500.01.T01 | RING-H2 finger protein ATL5I                                                      |
| augustus-2-processed-gene-320.59-mRNA-1 | Japonica | NA       |        |              | OsR498G0204765500.01.T01 |                                                                                   |
| augustus-2-processed-gene-321.24-mRNA-1 | Japonica | NA       |        |              | OsR498G0511427100.01.T01 | Epstein-Barr virus EBNA-1-like                                                    |
| augustus-2-processed-gene-335.26-mRNA-1 | Japonica | NA       |        |              | OsR498G0613106300.01.T01 |                                                                                   |
| augustus-2-processed-gene-337.13-mRNA-1 | Japonica | Indica   |        | Os01g0740700 | OsR498G0204773100.01.T01 | Phytoeyanin domain-containing protein                                             |
| augustus-2-processed-gene-337.2-mRNA-1  | Japonica | NA       |        | Os02g0747400 | OsR498G0204771300.01.T01 | Transcription factor TCP subgroup                                                 |
| augustus-2-processed-gene-337.29-mRNA-1 | Japonica | NA       |        |              | OsR498G0204776600.01.T02 | F-box/kelch-repeat protein SKIP11                                                 |
| augustus-2-processed-gene-337.30-mRNA-1 | Japonica | NA       |        | Os02g0748800 |                          | Glutaredoxin domain-containing protein (Fragment)                                 |
| augustus-2-processed-gene-338.1-mRNA-1  | Japonica | NA       |        |              | OsR498G0204779900.01.T01 |                                                                                   |
| augustus-2-processed-gene-338.10-mRNA-1 | Japonica | NA       |        | Os02g0749900 | OsR498G0204782500.01.T01 | Mitochondrial transcription termination factor-like                               |
| augustus-2-processed-gene-338.9-mRNA-1  | Japonica | NA       |        |              | OsR498G0204782300.01.T02 | mTERF transcription factor                                                        |
| augustus-2-processed-gene-34.13-mRNA-1  | Japonica | NA       |        | Os02g0162600 | OsR498G0203023100.01.T01 |                                                                                   |
| augustus-2-processed-gene-34.2-mRNA-1   | Japonica | Japonica | LRR-TM | Os02g0161700 | OsR498G0203018700.01.T01 | LRR receptor-like serine/threonine-protein kinase FLS2                            |
| augustus-2-processed-gene-35.50-mRNA-1  | Japonica | Indica   |        | Os06g0679500 | OsR498G0203023900.01.T03 | Hexosyltransferase                                                                |
| augustus-2-processed-gene-35.52-mRNA-1  | Japonica | NA       |        |              |                          | Agamous-like MADS-box protein AGL61                                               |

|                                         |          |          |           |              |                          |                                                                            |
|-----------------------------------------|----------|----------|-----------|--------------|--------------------------|----------------------------------------------------------------------------|
| augustus-2-processed-gene-35.56-mRNA-1  | Japonica | NA       |           | Os02g0164600 | OsR498G0203026500.01.T06 | Pentatricopeptide repeat (PPR) superfamily protein isoform 1               |
| augustus-2-processed-gene-355.36-mRNA-1 | Japonica | NA       |           | Os02g0757700 | OsR498G0204807100.01.T06 | F-box protein FBW2                                                         |
| augustus-2-processed-gene-355.39-mRNA-1 | Japonica | NA       |           |              | OsR498G0204808900.01.T01 |                                                                            |
| augustus-2-processed-gene-355.47-mRNA-1 | Japonica | NA       |           | Os02g0758200 |                          |                                                                            |
| augustus-2-processed-gene-356.1-mRNA-1  | Japonica | NA       |           | Os02g0759400 | OsR498G0204812100.01.T01 | E3 ubiquitin-protein ligase ATL6                                           |
| augustus-2-processed-gene-356.17-mRNA-1 | Japonica | NA       |           | Os02g0760400 |                          |                                                                            |
| augustus-2-processed-gene-356.19-mRNA-1 | Japonica | NA       |           | Os02g0760700 |                          |                                                                            |
| augustus-2-processed-gene-356.2-mRNA-1  | Japonica | NA       |           | Os02g0759500 | OsR498G0204812500.01.T01 | Pentatricopeptide repeat-containing protein mitochondrial                  |
| augustus-2-processed-gene-356.28-mRNA-1 | Japonica | NA       |           | Os02g0759800 | OsR498G0204814200.01.T01 | SNW/SKI-interacting protein-like                                           |
| augustus-2-processed-gene-357.24-mRNA-1 | Japonica | NA       |           | Os02g0762100 | OsR498G0204819800.01.T01 | 4-hydroxy-4-methyl-2-oxoglutarate aldolase                                 |
| augustus-2-processed-gene-357.5-mRNA-1  | Japonica | NA       |           | Os02g0761300 |                          |                                                                            |
| augustus-2-processed-gene-358.22-mRNA-1 | Japonica | NA       |           |              | OsR498G0204046800.01.T01 | Epstein-Barr virus EBNA-1-like                                             |
| augustus-2-processed-gene-358.40-mRNA-1 | Japonica | NA       |           |              | OsR498G0204046800.01.T01 | Circumsporozoite protein-like                                              |
| augustus-2-processed-gene-358.55-mRNA-1 | Japonica | NA       |           | Os02g0764700 | OsR498G0204826400.01.T01 | Ethylene-responsive element binding protein 2                              |
| augustus-2-processed-gene-359.43-mRNA-1 | Japonica | NA       |           | Os02g0766600 | OsR498G0204829100.01.T01 | HTH-type transcriptional repressor YcgE                                    |
| augustus-2-processed-gene-359.50-mRNA-1 | Japonica | NA       |           | Os01g0357100 | OsR498G0100930500.01.T02 | Ferredoxin--nitrite reductase chloroplastic                                |
| augustus-2-processed-gene-359.51-mRNA-1 | Japonica | NA       |           |              | OsR498G0204827800.01.T02 | Protein DCL, chloroplastic                                                 |
| augustus-2-processed-gene-359.60-mRNA-1 | Japonica | NA       |           |              | OsR498G0204832700.01.T01 | RING-type E3 ubiquitin transferase                                         |
| augustus-2-processed-gene-359.68-mRNA-1 | Japonica | NA       | Kinase-TM | Os02g0767400 | OsR498G0204832400.01.T01 | Non-specific serine/threonine protein kinase                               |
| augustus-2-processed-gene-359.70-mRNA-1 | Japonica | NA       |           | Os02g0767700 | OsR498G0204833000.01.T03 | Prolyl-tRNA synthetase associated domain-containing protein 1              |
| augustus-2-processed-gene-360.31-mRNA-1 | Japonica | NA       |           | Os02g0768700 | OsR498G0204836200.01.T01 | GeBP transcription factor (Fragment)                                       |
| augustus-2-processed-gene-361.17-mRNA-1 | Japonica | NA       |           | Os02g0770600 | OsR498G0204844300.01.T02 | G-protein coupled receptor 15 like                                         |
| augustus-2-processed-gene-361.28-mRNA-1 | Japonica | NA       |           | Os02g0771200 | OsR498G0204846200.01.T01 | Putative tyrosine-protein phosphatase                                      |
| augustus-2-processed-gene-361.8-mRNA-1  | Japonica | Indica   |           | Os02g0769900 | OsR498G0204841800.01.T01 | Chloroplast biogenesis 19 (Fragment)                                       |
| augustus-2-processed-gene-362.38-mRNA-1 | Japonica | NA       |           | Os01g0703000 | OsR498G0101842900.01.T01 |                                                                            |
| augustus-2-processed-gene-363.60-mRNA-1 | Japonica | NA       |           | Os02g0773600 | OsR498G0204854400.01.T01 | WRC domain-containing protein (Fragment)                                   |
| augustus-2-processed-gene-363.83-mRNA-1 | Japonica | NA       |           | Os02g0775300 | OsR498G0204858200.01.T02 |                                                                            |
| augustus-2-processed-gene-364.17-mRNA-1 | Japonica | NA       |           | Os02g0775600 | OsR498G0204860400.01.T01 | Zinc finger protein 6                                                      |
| augustus-2-processed-gene-364.42-mRNA-1 | Japonica | NA       |           |              | OsR498G0204863800.01.T02 | CCAAT-binding transcription factor B                                       |
| augustus-2-processed-gene-366.26-mRNA-1 | Japonica | NA       |           | Os02g0779200 | OsR498G0204874800.01.T01 | Senescence-associated subtilisin protease                                  |
| augustus-2-processed-gene-366.8-mRNA-1  | Japonica | Japonica |           | Os02g0778900 | OsR498G0204874500.01.T01 | Subtilisin-like protease                                                   |
| augustus-2-processed-gene-367.69-mRNA-1 | Japonica | NA       |           | Os07g0527600 | OsR498G0917525300.01.T01 | Putative cell death associated protein                                     |
| augustus-2-processed-gene-367.78-mRNA-1 | Japonica | Indica   |           | Os02g0781500 | OsR498G0204884700.01.T01 | GPI ethanolamine phosphate transferase 2                                   |
| augustus-2-processed-gene-367.82-mRNA-1 | Japonica | NA       |           |              | OsR498G0204881400.01.T01 | ATP-dependent DNA helicase                                                 |
| augustus-2-processed-gene-368.18-mRNA-1 | Japonica | NA       |           | Os02g0783100 | OsR498G0204892600.01.T01 | Mitochondrial transcription termination factor                             |
| augustus-2-processed-gene-369.26-mRNA-1 | Japonica | NA       |           |              | OsR498G0204897800.01.T01 | DUF295 domain-containing protein                                           |
| augustus-2-processed-gene-369.28-mRNA-1 | Japonica | NA       |           |              | OsR498G0204898400.01.T01 | Plastid transcriptionally active 18                                        |
| augustus-2-processed-gene-369.5-mRNA-1  | Japonica | NA       |           |              | OsR498G0204894500.01.T01 | F-box domain-containing protein (Fragment)                                 |
| augustus-2-processed-gene-370.38-mRNA-1 | Japonica | NA       |           | Os02g0785800 | OsR498G0204900900.01.T02 | 60S ribosomal protein I33-b                                                |
| augustus-2-processed-gene-370.47-mRNA-1 | Japonica | Indica   |           | Os02g0785000 | OsR498G0204900600.01.T01 | Hexosyltransferase                                                         |
| augustus-2-processed-gene-370.81-mRNA-1 | Japonica | NA       |           | Os02g0787000 |                          | SCP domain-containing protein (Fragment)                                   |
| augustus-2-processed-gene-371.37-mRNA-1 | Japonica | NA       | Kinase    | Os02g0787300 | OsR498G0204906600.01.T01 | MAP kinase kinase                                                          |
| augustus-2-processed-gene-372.27-mRNA-1 | Japonica | NA       |           | Os02g0791200 | OsR498G0204917500.01.T02 | Probable E3 ubiquitin-protein ligase XBO532                                |
| augustus-2-processed-gene-372.29-mRNA-1 | Japonica | NA       |           | Os02g0791500 | OsR498G0204919300.01.T01 | UDP-glucuronate 4-epimerase 1                                              |
| augustus-2-processed-gene-372.39-mRNA-1 | Japonica | NA       |           | Os02g0790600 | OsR498G0204916600.01.T01 | Putative RING-H2 finger protein ATL49                                      |
| augustus-2-processed-gene-373.44-mRNA-1 | Japonica | NA       |           | Os02g0792800 |                          | Protein TIC 55 chloroplastic                                               |
| augustus-2-processed-gene-373.46-mRNA-1 | Japonica | Indica   |           | Os02g0793200 | OsR498G0204924100.01.T02 | Zinc finger (CCCH-type) protein-like                                       |
| augustus-2-processed-gene-375.1-mRNA-1  | Japonica | NA       |           |              | OsR498G0204932500.01.T01 | RNA polymerase II C-terminal domain phosphatase-like                       |
| augustus-2-processed-gene-375.4-mRNA-1  | Japonica | NA       |           | Os02g0796300 |                          | Poly(A)-specific ribonuclease                                              |
| augustus-2-processed-gene-376.0-mRNA-1  | Japonica | NA       |           | Os02g0797300 | OsR498G0204938900.01.T01 | Plasma membrane ATPase                                                     |
| augustus-2-processed-gene-376.19-mRNA-1 | Japonica | NA       |           | Os02g0798450 | OsR498G0204942600.01.T01 |                                                                            |
| augustus-2-processed-gene-377.26-mRNA-1 | Japonica | NA       |           | Os02g0799000 | OsR498G0204944700.01.T02 | Protein-serine/threonine phosphatase                                       |
| augustus-2-processed-gene-377.29-mRNA-1 | Japonica | Indica   |           | Os02g0799600 | OsR498G0204947300.01.T01 | Serine-rich protein-related                                                |
| augustus-2-processed-gene-377.42-mRNA-1 | Japonica | NA       |           | Os02g0800300 | OsR498G0204954900.01.T01 |                                                                            |
| augustus-2-processed-gene-377.52-mRNA-1 | Japonica | NA       |           |              |                          | NADH dehydrogenase [ubiquinone] 1 alpha subcomplex subunit 9 mitochondrion |
| augustus-2-processed-gene-378.13-mRNA-1 | Japonica | NA       |           |              | OsR498G0204960100.01.T01 |                                                                            |
| augustus-2-processed-gene-378.15-mRNA-1 | Japonica | NA       |           |              | OsR498G0204961100.01.T02 |                                                                            |
| augustus-2-processed-gene-378.29-mRNA-1 | Japonica | NA       |           |              | OsR498G1018994800.01.T01 |                                                                            |
| augustus-2-processed-gene-379.15-mRNA-1 | Japonica | NA       |           | Os02g0805400 |                          | influenza virus NS1A-binding protein homolog A                             |
| augustus-2-processed-gene-379.16-mRNA-1 | Japonica | NA       |           | Os02g0805600 | OsR498G0204968900.01.T01 | Quinone oxidoreductase PIG3                                                |
| augustus-2-processed-gene-379.30-mRNA-1 | Japonica | NA       |           | Os02g0805500 | OsR498G0204968800.01.T01 | 3'(2'),5'-bisphosphate nucleotidase                                        |

|                                          |          |          |               |              |                          |                                                                         |
|------------------------------------------|----------|----------|---------------|--------------|--------------------------|-------------------------------------------------------------------------|
| augustus-2-processed-gene-381.26-mRNA-1  | Japonica | NA       |               | Os02g0809100 | OsR498G0204980200.01.T01 | PB1 domain-containing protein (Fragment)                                |
| augustus-2-processed-gene-381.28-mRNA-1  | Japonica | NA       |               |              | OsR498G0511427100.01.T01 | Circumsporozoite protein-like                                           |
| augustus-2-processed-gene-382.2-mRNA-1   | Japonica | NA       |               | Os02g0809800 | OsR498G0204983100.01.T04 | Phosphate transporter PHO1-2                                            |
| augustus-2-processed-gene-382.3-mRNA-1   | Japonica | NA       |               | Os02g0809800 | OsR498G0204983100.01.T04 | Phosphate transporter PHO1-2                                            |
| augustus-2-processed-gene-383.42-mRNA-1  | Japonica | Japonica |               | Os02g0812700 | OsR498G0204994700.01.T01 | Phloem-specific lectin                                                  |
| augustus-2-processed-gene-383.44-mRNA-1  | Japonica | Indica   |               | Os02g0813300 | OsR498G0204994900.01.T01 | F-box family protein-like                                               |
| augustus-2-processed-gene-384.80-mRNA-1  | Japonica | NA       |               | Os02g0814700 | OsR498G0205000500.01.T01 | Ribosomal protein L17                                                   |
| augustus-2-processed-gene-385.76-mRNA-1  | Japonica | NA       |               | Os02g0816000 | OsR498G0205003700.01.T01 | FT-interacting protein 1                                                |
| augustus-2-processed-gene-385.80-mRNA-1  | Japonica | NA       |               | Os02g0816800 | OsR498G0205007100.01.T01 | Epimerase domain-containing protein                                     |
| augustus-2-processed-gene-386.43-mRNA-1  | Japonica | NA       |               | Os02g0817000 | OsR498G0205007900.01.T02 | Myb-like domain-containing protein (Fragment)                           |
| augustus-2-processed-gene-386.56-mRNA-1  | Japonica | NA       |               | Os02g0817700 | OsR498G0205010200.01.T01 | Acetyl-CoA C-acyltransferase-like protein                               |
| augustus-2-processed-gene-386.60-mRNA-1  | Japonica | NA       |               |              | OsR498G0205011000.01.T02 | Putative NB-ARC domain-containing protein (Fragment)                    |
| augustus-2-processed-gene-386.62-mRNA-1  | Japonica | NA       |               | Os02g0818500 |                          |                                                                         |
| augustus-2-processed-gene-387.38-mRNA-1  | Japonica | NA       |               | Os02g0818800 |                          | Selenium-binding protein-like                                           |
| augustus-2-processed-gene-387.52-mRNA-1  | Japonica | NA       |               | Os02g0820200 | OsR498G0205020500.01.T01 | RING-H2 finger protein ATL1                                             |
| augustus-2-processed-gene-388.51-mRNA-1  | Japonica | NA       |               | Os02g0820800 | OsR498G0205022500.01.T01 | PPC domain-containing protein (Fragment)                                |
| augustus-2-processed-gene-388.56-mRNA-1  | Japonica | NA       |               | Os02g0820400 | OsR498G0205021000.01.T01 | Anthocyanin 5-aromatic acyltransferase                                  |
| augustus-2-processed-gene-389.43-mRNA-1  | Japonica | NA       |               | Os02g0822700 |                          | 4-coumarate--CoA ligase-like 5                                          |
| augustus-2-processed-gene-389.59-mRNA-1  | Japonica | Japonica |               | Os02g0824100 | OsR498G0100001000.01.T01 | Cytokinin trans-hydroxylase                                             |
| augustus-2-processed-gene-389.67-mRNA-1  | Japonica | NA       |               |              |                          | Zinc finger protein 1                                                   |
| augustus-2-processed-gene-39.27-mRNA-1   | Japonica | NA       |               | Os02g0170701 |                          | SLT domain-containing protein                                           |
| augustus-2-processed-gene-39.9-mRNA-1    | Japonica | NA       |               | Os02g0170500 | OsR498G0203056200.01.T03 | CCAAT-binding transcription factor C                                    |
| augustus-2-processed-gene-390.14-mRNA-1  | Japonica | Indica   |               | Os02g0825100 | OsR498G0205034900.01.T01 | F-box domain-containing protein                                         |
| augustus-2-processed-gene-390.33-mRNA-1  | Japonica | NA       |               | Os02g0826300 |                          |                                                                         |
| augustus-2-processed-gene-390.4-mRNA-1   | Japonica | Japonica |               | Os02g0825500 | OsR498G0205034900.01.T01 | F-box domain-containing protein                                         |
| augustus-2-processed-gene-390.45-mRNA-1  | Japonica | NA       |               | Os02g0826400 | OsR498G0205038000.01.T03 | U-box domain-containing protein 30                                      |
| augustus-2-processed-gene-391.79-mRNA-1  | Japonica | Indica   |               | Os02g0828500 | OsR498G0205043500.01.T03 | E3 ubiquitin-protein ligase RNF25                                       |
| augustus-2-processed-gene-391.80-mRNA-1  | Japonica | NA       |               | Os02g0828500 | OsR498G0205044100.01.T01 | Tetratricopeptide-like helical                                          |
| augustus-2-processed-gene-392.11-mRNA-1  | Japonica | NA       |               | Os02g0830000 |                          | Pentatricopeptide repeat                                                |
| augustus-2-processed-gene-392.20-mRNA-1  | Japonica | NA       |               | Os02g0829800 | OsR498G0205048000.01.T01 | Membrane-associated salt-inducible protein-like                         |
| augustus-2-processed-gene-392.5-mRNA-1   | Japonica | NA       |               | Os09g0562400 | OsR498G0101823900.01.T01 | Transposon protein, putative, Mutator sub-class, expressed              |
| augustus-2-processed-gene-393.107-mRNA-1 | Japonica | NA       |               | Os02g0831800 |                          | Homoserine kinase                                                       |
| augustus-2-processed-gene-393.111-mRNA-1 | Japonica | NA       |               | Os02g0832600 | OsR498G0205054500.01.T02 | Large tegument protein like                                             |
| augustus-2-processed-gene-393.118-mRNA-1 | Japonica | NA       |               | Os02g0833500 | OsR498G0205056900.01.T01 | Cation/H(+) antiporter 1                                                |
| augustus-2-processed-gene-393.149-mRNA-1 | Japonica | NA       |               | Os02g0832150 |                          | RING-H2 finger protein ATL44                                            |
| augustus-2-processed-gene-393.152-mRNA-1 | Japonica | NA       |               | Os02g0833300 | OsR498G0205056400.01.T05 | ESCRT-I complex subunit TSG101                                          |
| augustus-2-processed-gene-4.37-mRNA-1    | Japonica | NA       | Kinase-LRR-TM | Os02g0211200 |                          | Putative LRR receptor-like serine/threonine-protein kinase              |
| augustus-2-processed-gene-4.49-mRNA-1    | Japonica | NA       |               | Os02g0107600 | OsR498G0202821800.01.T04 | SEC63 domain-containing protein                                         |
| augustus-2-processed-gene-43.21-mRNA-1   | Japonica | Japonica |               | Os02g0178300 | OsR498G0203084800.01.T01 | Protein GLUTAMINE DUMPER 5                                              |
| augustus-2-processed-gene-48.1-mRNA-1    | Japonica | Indica   |               | Os02g0184900 | OsR498G0203109500.01.T01 | Prennaspirodiene oxygenase                                              |
| augustus-2-processed-gene-49.23-mRNA-1   | Japonica | Indica   |               | Os02g0188000 | OsR498G0203122000.01.T02 | Glycosyltransferase                                                     |
| augustus-2-processed-gene-5.21-mRNA-1    | Japonica | NA       |               | Os02g0108400 | OsR498G0202827500.01.T01 | SEC63 domain-containing protein                                         |
| augustus-2-processed-gene-51.25-mRNA-1   | Japonica | Indica   |               | Os02g0190600 | OsR498G0203132400.01.T02 | Lycopene beta cyclase chloroplastic                                     |
| augustus-2-processed-gene-51.31-mRNA-1   | Japonica | Japonica |               | Os02g0191200 | OsR498G0613274200.01.T01 | Pentatricopeptide repeat-containing protein chloroplastic/mitochondrial |
| augustus-2-processed-gene-51.36-mRNA-1   | Japonica | Japonica | CC-LRR-NBS-TM | Os02g0191000 | OsR498G0203022300.01.T01 | Disease resistance protein RPM1                                         |
| augustus-2-processed-gene-51.39-mRNA-1   | Japonica | NA       |               | Os02g0191600 |                          | BZIP domain-containing protein (Fragment)                               |
| augustus-2-processed-gene-52.12-mRNA-1   | Japonica | NA       | Kinase-TM     |              | OsR498G0203139900.01.T01 | Proline-rich receptor-like protein kinase PERK9 (Fragment)              |
| augustus-2-processed-gene-52.13-mRNA-1   | Japonica | NA       |               |              | OsR498G0203142100.01.T02 | Subtilisin-like protease-like isoform X1                                |
| augustus-2-processed-gene-52.19-mRNA-1   | Japonica | NA       |               | Os02g0193100 | OsR498G0203140400.01.T01 | TMV response protein                                                    |
| augustus-2-processed-gene-52.20-mRNA-1   | Japonica | NA       |               | Os02g0193200 | OsR498G0203141200.01.T01 |                                                                         |
| augustus-2-processed-gene-53.2-mRNA-1    | Japonica | NA       |               | Os02g0193900 | OsR498G0203143300.01.T01 | Mediator of RNA polymerase II transcription subunit like                |
| augustus-2-processed-gene-57.16-mRNA-1   | Japonica | NA       |               | Os02g0202000 | OsR498G0203172500.01.T01 | AP domain containing transcription factor                               |
| augustus-2-processed-gene-57.24-mRNA-1   | Japonica | NA       |               |              | OsR498G0203169800.01.T02 |                                                                         |
| augustus-2-processed-gene-58.4-mRNA-1    | Japonica | NA       |               | Os02g0203300 | OsR498G0203177300.01.T01 | Glycosyltransferase                                                     |
| augustus-2-processed-gene-59.5-mRNA-1    | Japonica | NA       |               | Os02g0204100 |                          | Tetratricopeptide repeat (TPR)-like superfamily protein                 |
| augustus-2-processed-gene-6.0-mRNA-1     | Japonica | NA       |               | Os02g0110400 | OsR498G0202833200.01.T02 | Pentatricopeptide repeat                                                |
| augustus-2-processed-gene-6.11-mRNA-1    | Japonica | NA       |               | Os02g0111900 | OsR498G0202836100.01.T01 | Nucleic acid binding,ATP-dependent helicase                             |
| augustus-2-processed-gene-6.12-mRNA-1    | Japonica | NA       |               | Os02g0112600 | OsR498G0202837400.01.T01 | High affinity nitrate transporter                                       |
| augustus-2-processed-gene-6.27-mRNA-1    | Japonica | NA       | Kinase-LRR-TM | Os02g0111800 | OsR498G0202835600.01.T01 | Leucine-rich repeat receptor-like protein kinase PXL2                   |
| augustus-2-processed-gene-6.8-mRNA-1     | Japonica | NA       |               |              | OsR498G0202834300.01.T01 | Peptidyl-prolyl cis-trans isomerase                                     |
| augustus-2-processed-gene-60.18-mRNA-1   | Japonica | NA       |               |              | OsR498G0611960200.01.T01 |                                                                         |

|                                         |          |          |        |              |                          |                                                                                 |
|-----------------------------------------|----------|----------|--------|--------------|--------------------------|---------------------------------------------------------------------------------|
| augustus-2-processed-gene-61.12-mRNA-1  | Japonica | NA       |        |              | OsR498G0203195100.01.T04 | RRM domain-containing protein (Fragment)                                        |
| augustus-2-processed-gene-61.21-mRNA-1  | Japonica | NA       |        | Os02g0207900 | OsR498G0203194400.01.T01 | Caffeoylshikimate esterase                                                      |
| augustus-2-processed-gene-61.22-mRNA-1  | Japonica | Indica   |        | Os02g0208700 | OsR498G0203197400.01.T01 | Kelch repeat type 1                                                             |
| augustus-2-processed-gene-62.56-mRNA-1  | Japonica | NA       |        | Os02g0212975 | OsR498G1019116500.01.T01 |                                                                                 |
| augustus-2-processed-gene-62.71-mRNA-1  | Japonica | Japonica |        | Os02g0209400 | OsR498G0203200800.01.T02 |                                                                                 |
| augustus-2-processed-gene-63.19-mRNA-1  | Japonica | NA       |        | Os02g0211000 | OsR498G0203203700.01.T01 | ATP-binding cassette transporter subfamily A member                             |
| augustus-2-processed-gene-64.18-mRNA-1  | Japonica | NA       |        |              |                          |                                                                                 |
| augustus-2-processed-gene-64.19-mRNA-1  | Japonica | NA       |        | Os02g0213800 |                          |                                                                                 |
| augustus-2-processed-gene-65.10-mRNA-1  | Japonica | NA       |        | Os02g0214600 |                          | Retrotransposon protein, putative, Ty3-gypsy subclass                           |
| augustus-2-processed-gene-65.14-mRNA-1  | Japonica | Japonica |        | Os02g0215100 | OsR498G0203218300.01.T01 |                                                                                 |
| augustus-2-processed-gene-67.10-mRNA-1  | Japonica | NA       |        | Os02g0218700 | OsR498G0203227900.01.T01 | Allene oxide synthase, chloroplastic                                            |
| augustus-2-processed-gene-67.11-mRNA-1  | Japonica | NA       |        | Os02g0218800 | OsR498G0203228700.01.T01 | Allene oxide synthase, chloroplastic                                            |
| augustus-2-processed-gene-67.28-mRNA-1  | Japonica | NA       |        | Os02g0219000 | OsR498G0203229000.01.T01 | Interferon-related developmental regulator family protein / IFRD protein family |
| augustus-2-processed-gene-67.29-mRNA-1  | Japonica | Japonica |        | Os02g0219050 | OsR498G0816363900.01.T01 | Interferon-related developmental regulator family protein / IFRD protein family |
| augustus-2-processed-gene-69.10-mRNA-1  | Japonica | Indica   |        | Os06g0564500 | OsR498G0203238300.01.T03 | PALP domain-containing protein                                                  |
| augustus-2-processed-gene-69.18-mRNA-1  | Japonica | NA       |        | Os02g0221500 | OsR498G0203237200.01.T01 | Heterogeneous nuclear ribonucleoprotein 1                                       |
| augustus-2-processed-gene-70.32-mRNA-1  | Japonica | NA       |        | Os02g0223200 |                          | GTP cyclohydrolase II                                                           |
| augustus-2-processed-gene-72.46-mRNA-1  | Japonica | NA       |        |              |                          | Hydroxyproline-rich glycoprotein-like                                           |
| augustus-2-processed-gene-74.10-mRNA-1  | Japonica | NA       |        | Os02g0229400 | OsR498G0203272500.01.T04 | Monosaccharide-sensing protein 2                                                |
| augustus-2-processed-gene-75.0-mRNA-1   | Japonica | NA       |        | Os02g0230200 | OsR498G0203275100.01.T05 | Secretion-regulating guanine nucleotide exchange factor                         |
| augustus-2-processed-gene-76.28-mRNA-1  | Japonica | NA       |        | Os02g0231600 |                          | DDE Tnp4 domain-containing protein (Fragment)                                   |
| augustus-2-processed-gene-76.43-mRNA-1  | Japonica | NA       |        |              | OsR498G0713376400.01.T01 |                                                                                 |
| augustus-2-processed-gene-77.9-mRNA-1   | Japonica | Indica   |        | Os02g0234300 | OsR498G0203292500.01.T01 | RING-type E3 ubiquitin transferase                                              |
| augustus-2-processed-gene-78.37-mRNA-1  | Japonica | NA       |        | Os02g0234500 | OsR498G0203293100.01.T04 | NAD(P)-binding rosmann-fold protein                                             |
| augustus-2-processed-gene-79.23-mRNA-1  | Japonica | NA       |        | Os02g0236500 |                          | TTF-type domain-containing protein                                              |
| augustus-2-processed-gene-79.29-mRNA-1  | Japonica | Japonica |        | Os02g0237000 | OsR498G0203303300.01.T01 | Peroxidase                                                                      |
| augustus-2-processed-gene-81.50-mRNA-1  | Japonica | Japonica |        | Os02g0241700 | OsR498G0203313200.01.T01 | Glycosyltransferase                                                             |
| augustus-2-processed-gene-82.10-mRNA-1  | Japonica | NA       |        | Os02g0242100 | OsR498G0203313200.01.T01 | Glycosyltransferase                                                             |
| augustus-2-processed-gene-82.27-mRNA-1  | Japonica | NA       |        | Os02g0242900 | OsR498G0203314800.01.T01 | Glycosyltransferase                                                             |
| augustus-2-processed-gene-82.31-mRNA-1  | Japonica | NA       |        | Os02g0243300 | OsR498G0203315000.01.T02 | Glycosyltransferase                                                             |
| augustus-2-processed-gene-83.9-mRNA-1   | Japonica | NA       |        | Os02g0245100 | OsR498G0203320200.01.T01 | Peroxisome bioproteins protein 7                                                |
| augustus-2-processed-gene-84.13-mRNA-1  | Japonica | NA       |        |              | OsR498G0713983500.01.T01 |                                                                                 |
| augustus-2-processed-gene-84.20-mRNA-1  | Japonica | NA       |        |              | OsR498G0203321400.01.T01 |                                                                                 |
| augustus-2-processed-gene-84.27-mRNA-1  | Japonica | NA       |        | Os02g0245900 |                          |                                                                                 |
| augustus-2-processed-gene-85.17-mRNA-1  | Japonica | NA       |        |              | OsR498G0203327800.01.T01 | E3 ubiquitin-protein ligase EL5-like                                            |
| augustus-2-processed-gene-85.20-mRNA-1  | Japonica | Indica   |        | Os02g0248320 | OsR498G0203329000.01.T01 | RING-H2 finger protein ATL5H                                                    |
| augustus-2-processed-gene-85.24-mRNA-1  | Japonica | NA       |        |              |                          | RING-H2 finger protein ATL5H                                                    |
| augustus-2-processed-gene-85.4-mRNA-1   | Japonica | Japonica |        | Os02g0247200 | OsR498G0203326000.01.T01 | T-complex protein 1 subunit gamma                                               |
| augustus-2-processed-gene-85.9-mRNA-1   | Japonica | NA       |        |              | OsR498G0203327100.01.T01 |                                                                                 |
| augustus-2-processed-gene-86.0-mRNA-1   | Japonica | NA       |        | Os02g0249300 | OsR498G0203331500.01.T01 | RING-H2 finger protein ATL1N                                                    |
| augustus-2-processed-gene-86.2-mRNA-1   | Japonica | NA       |        | Os02g0249500 |                          | Cupin type-1 domain-containing protein                                          |
| augustus-2-processed-gene-86.20-mRNA-1  | Japonica | NA       |        | Os01g0265300 | OsR498G0100612800.01.T01 | Transposable element protein, putative, MuDR                                    |
| augustus-2-processed-gene-86.23-mRNA-1  | Japonica | NA       |        | Os02g0250600 |                          | Seed biotin-containing protein SBP65 isoform X1                                 |
| augustus-2-processed-gene-86.24-mRNA-1  | Japonica | NA       |        |              | OsR498G0203337800.01.T01 |                                                                                 |
| augustus-2-processed-gene-87.0-mRNA-1   | Japonica | NA       |        | Os02g0251700 | OsR498G0203339500.01.T02 | Dual specificity phosphatase, catalytic domain containing protein, expressed    |
| augustus-2-processed-gene-87.20-mRNA-1  | Japonica | NA       |        | Os02g0252400 | OsR498G0203342200.01.T01 | Dof zinc finger protein like                                                    |
| augustus-2-processed-gene-88.44-mRNA-1  | Japonica | NA       |        | Os02g0255100 | OsR498G0203347900.01.T01 | PPM-type phosphatase domain-containing protein                                  |
| augustus-2-processed-gene-90.22-mRNA-1  | Japonica | NA       |        | Os02g0258800 | OsR498G0203360700.01.T03 |                                                                                 |
| augustus-2-processed-gene-90.30-mRNA-1  | Japonica | Indica   |        | Os06g0523100 | OsR498G0203361400.01.T03 |                                                                                 |
| augustus-2-processed-gene-93.14-mRNA-1  | Japonica | Japonica | NBS-TM | Os02g0262800 | OsR498G0203369300.01.T01 | Powdery mildew resistance protein                                               |
| augustus-2-processed-gene-95.1-mRNA-1   | Japonica | Japonica |        | Os02g0265300 | OsR498G0203374300.01.T01 |                                                                                 |
| augustus-2-processed-gene-99.35-mRNA-1  | Japonica | Indica   |        | Os10g0130200 | OsR498G0203391400.01.T01 | F-box domain containing protein, expressed                                      |
| augustus-3-processed-gene-100.38-mRNA-1 | Japonica | NA       |        |              | OsR498G0305744400.01.T01 |                                                                                 |
| augustus-3-processed-gene-101.76-mRNA-1 | Japonica | NA       |        |              | OsR498G0305753500.01.T05 |                                                                                 |
| augustus-3-processed-gene-102.33-mRNA-1 | Japonica | NA       |        |              | OsR498G0305757300.01.T02 | Pentatricopeptide repeat                                                        |
| augustus-3-processed-gene-102.65-mRNA-1 | Japonica | Japonica |        | Os03g0299600 | OsR498G0305763200.01.T01 | Senescence associated gene 20                                                   |
| augustus-3-processed-gene-110.47-mRNA-1 | Japonica | NA       |        | Os03g0314500 | OsR498G0305816300.01.T01 | Tol-Pal system beta propeller repeat-containing protein                         |
| augustus-3-processed-gene-118.23-mRNA-1 | Japonica | Japonica |        | Os03g0103400 | OsR498G0305078700.01.T01 | GRAS domain-containing protein (Fragment)                                       |
| augustus-3-processed-gene-144.3-mRNA-1  | Japonica | NA       |        | Os10g0550000 | OsR498G1019144500.01.T01 | Phosphatidylinositol N-acetylglucosaminyltransferase subunit P-related          |
| augustus-3-processed-gene-144.4-mRNA-1  | Japonica | NA       |        |              | OsR498G1019145300.01.T01 | Mediator of RNA polymerase II transcription subunit 12                          |
| augustus-3-processed-gene-149.22-mRNA-1 | Japonica | NA       |        | Os03g0325700 | OsR498G0305859100.01.T01 | QXW lectin repeat family protein                                                |

|                                          |          |          |           |              |                          |                                                                  |
|------------------------------------------|----------|----------|-----------|--------------|--------------------------|------------------------------------------------------------------|
| augustus-3-processed-gene-151.33-mRNA-1  | Japonica | NA       |           |              |                          | DDE Tnp4 domain-containing protein                               |
| augustus-3-processed-gene-151.34-mRNA-1  | Japonica | Japonica |           | Os03g0328200 | OsR498G0510886900.01.T01 | Transposon protein, putative, CACTA, En/Spm sub-class            |
| augustus-3-processed-gene-178.51-mRNA-1  | Japonica | Indica   |           | Os07g0640900 | OsR498G0306009600.01.T01 | Heat shock transcription factor, other eukaryote                 |
| augustus-3-processed-gene-215.19-mRNA-1  | Japonica | NA       |           | Os03g0425600 | OsR498G0306243700.01.T01 | UDP-glucose 6-dehydrogenase 5                                    |
| augustus-3-processed-gene-22.3-mRNA-1    | Japonica | NA       |           | Os03g0143600 | OsR498G0305218500.01.T01 | PHD finger protein ING                                           |
| augustus-3-processed-gene-232.24-mRNA-1  | Japonica | NA       |           |              | OsR498G0100933000.01.T01 | Retrotransposon protein, putative, Ty3-gypsy sub-class           |
| augustus-3-processed-gene-232.3-mRNA-1   | Japonica | NA       |           |              | OsR498G0510213600.01.T01 |                                                                  |
| augustus-3-processed-gene-26.23-mRNA-1   | Japonica | NA       |           |              | OsR498G0100724200.01.T01 | Transposon protein, putative, Mutator sub-class, expressed       |
| augustus-3-processed-gene-281.57-mRNA-1  | Japonica | NA       |           |              | OsR498G1018661500.01.T01 |                                                                  |
| augustus-3-processed-gene-29.11-mRNA-1   | Japonica | NA       |           | Os03g0158600 | OsR498G0305257100.01.T02 | RNase H domain-containing protein (Fragment)                     |
| augustus-3-processed-gene-290.10-mRNA-1  | Japonica | NA       |           |              |                          | Aminotransferase-like                                            |
| augustus-3-processed-gene-294.25-mRNA-1  | Japonica | NA       |           | Os10g0381700 |                          | F-box domain containing protein, expressed                       |
| augustus-3-processed-gene-3.69-mRNA-1    | Japonica | NA       |           | Os03g0110400 | OsR498G0305103900.01.T02 | THO complex, subunit THOC                                        |
| augustus-3-processed-gene-303.4-mRNA-1   | Japonica | NA       |           |              | OsR498G0204301500.01.T06 | ATP-dependent DNA helicase                                       |
| augustus-3-processed-gene-322.36-mRNA-1  | Japonica | NA       |           | Os12g0468900 | OsR498G0407549800.01.T01 | Cell wall protein-like                                           |
| augustus-3-processed-gene-335.16-mRNA-1  | Japonica | NA       |           | Os03g0558000 |                          |                                                                  |
| augustus-3-processed-gene-388.39-mRNA-1  | Japonica | NA       |           | Os03g0648400 | OsR498G0306670300.01.T02 | Chaperone protein dnaJ 3                                         |
| augustus-3-processed-gene-392.3-mRNA-1   | Japonica | NA       |           |              |                          | Transposable element protein, putative, MuDR                     |
| augustus-3-processed-gene-402.30-mRNA-1  | Japonica | NA       |           |              | OsR498G1120483500.01.T01 | Transposon protein, putative, CACTA, En/Spm sub-class            |
| augustus-3-processed-gene-406.41-mRNA-1  | Japonica | NA       |           |              |                          | Vacuolar protein sorting-associated protein 26                   |
| augustus-3-processed-gene-41.35-mRNA-1   | Japonica | NA       |           |              | OsR498G0305342800.01.T01 | Plasma membrane ATPase                                           |
| augustus-3-processed-gene-410.74-mRNA-1  | Japonica | NA       |           |              |                          | Tetratricopeptide repeat (TPR)-like superfamily protein          |
| augustus-3-processed-gene-412.43-mRNA-1  | Japonica | NA       |           | Os03g0689300 | OsR498G0306830100.01.T03 | Plasma membrane ATPase                                           |
| augustus-3-processed-gene-414.55-mRNA-1  | Japonica | NA       |           |              |                          | CW14 protein isoform 2                                           |
| augustus-3-processed-gene-416.20-mRNA-1  | Japonica | NA       |           |              | OsR498G0306743300.01.T01 | Hydroxyproline-rich glycoprotein-like                            |
| augustus-3-processed-gene-416.21-mRNA-1  | Japonica | NA       |           | Os03g0697200 | OsR498G0306865100.01.T01 | Cytokinin riboside 5'-monophosphate phosphoribohydrolase         |
| augustus-3-processed-gene-417.2-mRNA-1   | Japonica | Japonica |           | Os03g0110200 | OsR498G0101158000.01.T01 | Transposon protein, putative, Mutator sub-class, expressed       |
| augustus-3-processed-gene-419.75-mRNA-1  | Japonica | NA       |           |              |                          | Transposon protein, putative, Mutator sub-class                  |
| augustus-3-processed-gene-426.27-mRNA-1  | Japonica | NA       |           |              |                          | Endonuclease                                                     |
| augustus-3-processed-gene-43.53-mRNA-1   | Japonica | NA       |           |              | OsR498G0305352900.01.T04 | Dentin sialophosphoprotein-related                               |
| augustus-3-processed-gene-430.30-mRNA-1  | Japonica | NA       |           | Os03g0721700 | OsR498G0306955400.01.T01 | DUF569 domain-containing protein                                 |
| augustus-3-processed-gene-438.73-mRNA-1  | Japonica | NA       |           | Os03g0735000 | OsR498G0307002800.01.T02 | Glucose-1-phosphate adenyllyltransferase                         |
| augustus-3-processed-gene-440.40-mRNA-1  | Japonica | NA       |           | Os03g0738100 | OsR498G0307011300.01.T09 | Phosphatidylinositol 3-and 4-kinase family protein, expressed    |
| augustus-3-processed-gene-444.35-mRNA-1  | Japonica | NA       |           |              | OsR498G0307040600.01.T01 |                                                                  |
| augustus-3-processed-gene-450.67-mRNA-1  | Japonica | NA       |           |              | OsR498G0307071000.01.T03 |                                                                  |
| augustus-3-processed-gene-451.11-mRNA-1  | Japonica | NA       |           |              | OsR498G0307071200.01.T02 |                                                                  |
| augustus-3-processed-gene-459.2-mRNA-1   | Japonica | NA       |           | Os03g0773600 | OsR498G0307130100.01.T04 | Kinesin-like protein KIN-8B                                      |
| augustus-3-processed-gene-46.67-mRNA-1   | Japonica | Indica   |           | Os09g0368500 | OsR498G0305377500.01.T02 | Flavin containing polyamine oxidase                              |
| augustus-3-processed-gene-465.45-mRNA-1  | Japonica | NA       |           | Os03g0786500 | OsR498G0307172400.01.T03 | DNA topoisomerase                                                |
| augustus-3-processed-gene-465.54-mRNA-1  | Japonica | NA       |           | Os03g0787300 | OsR498G0307174300.01.T01 | Chaperone protein dnaJ 3                                         |
| augustus-3-processed-gene-469.45-mRNA-1  | Japonica | NA       |           | Os03g0795100 | OsR498G0307197400.01.T01 |                                                                  |
| augustus-3-processed-gene-47.35-mRNA-1   | Japonica | NA       |           |              | OsR498G0101349400.01.T01 | Splicing coactivator subunit-like                                |
| augustus-3-processed-gene-472.68-mRNA-1  | Japonica | NA       |           |              | OsR498G0307222300.01.T01 |                                                                  |
| augustus-3-processed-gene-478.14-mRNA-1  | Japonica | NA       |           | Os03g0812200 | OsR498G0307259300.01.T02 | RING-type E3 ubiquitin transferase                               |
| augustus-3-processed-gene-479.34-mRNA-1  | Japonica | NA       |           | Os08g0338000 |                          | DDE Tnp4 domain-containing protein (Fragment)                    |
| augustus-3-processed-gene-490.28-mRNA-1  | Japonica | NA       |           | Os03g0110200 |                          | MuDR family transposase domain containing protein                |
| augustus-3-processed-gene-491.56-mRNA-1  | Japonica | NA       | Kinase-TM |              |                          | probable receptor-like serine/threonine-protein kinase At5g57670 |
| augustus-3-processed-gene-493.101-mRNA-1 | Japonica | NA       |           | Os03g0844900 | OsR498G0307357600.01.T02 | Nucleic acid-binding proteins superfamily                        |
| augustus-3-processed-gene-493.104-mRNA-1 | Japonica | Indica   |           | Os03g0845300 | OsR498G0307358600.01.T01 | Nuclear RNA binding protein A                                    |
| augustus-3-processed-gene-493.97-mRNA-1  | Japonica | NA       | Kinase    | Os03g0844100 | OsR498G0307355200.01.T01 | Tyrosine-protein kinase                                          |
| augustus-3-processed-gene-496.5-mRNA-1   | Japonica | NA       |           | Os03g0849900 | OsR498G0307369900.01.T01 | Glycosyltransferase                                              |
| augustus-3-processed-gene-77.33-mRNA-1   | Japonica | NA       |           | Os03g0251000 | OsR498G0305585800.01.T01 | AAI domain-containing protein                                    |
| augustus-3-processed-gene-80.65-mRNA-1   | Japonica | NA       |           | Os03g0255500 | OsR498G0305600800.01.T07 | Phosphoenolpyruvate carboxykinase (ATP)                          |
| augustus-4-processed-gene-109.27-mRNA-1  | Japonica | NA       |           | Os04g0346000 | OsR498G0408213500.01.T05 | Prolyl 4-hydroxylase alpha subunit                               |
| augustus-4-processed-gene-11.2-mRNA-1    | Japonica | NA       |           | Os04g0186400 | OsR498G0407666500.01.T01 | H(+)/Pi cotransporter                                            |
| augustus-4-processed-gene-118.0-mRNA-1   | Japonica | NA       |           |              | OsR498G0408285100.01.T01 |                                                                  |
| augustus-4-processed-gene-12.15-mRNA-1   | Japonica | Indica   |           | Os04g0188500 | OsR498G0407674500.01.T02 |                                                                  |
| augustus-4-processed-gene-12.17-mRNA-1   | Japonica | NA       |           |              | OsR498G0509838600.01.T01 | HGWP repeat containing protein-like                              |
| augustus-4-processed-gene-120.22-mRNA-1  | Japonica | Japonica |           | Os04g0364800 | OsR498G0204388300.01.T01 | Kiwelin                                                          |
| augustus-4-processed-gene-131.46-mRNA-1  | Japonica | NA       |           | Os04g0379600 | OsR498G0408386100.01.T01 | Nitrate-induced NOI protein                                      |
| augustus-4-processed-gene-138.55-mRNA-1  | Japonica | NA       |           |              | OsR498G0408442900.01.T01 | GLTSCR1 domain-containing protein (Fragment)                     |

|                                         |          |          |               |              |                          |                                                      |
|-----------------------------------------|----------|----------|---------------|--------------|--------------------------|------------------------------------------------------|
| augustus-4-processed-gene-139.19-mRNA-1 | Japonica | NA       |               | Os04g0394200 | OsR498G0408449100.01.T04 | Dihydrolipoyllysine-residue succinyltransferase      |
| augustus-4-processed-gene-153.23-mRNA-1 | Japonica | NA       |               | Os04g0419100 |                          |                                                      |
| augustus-4-processed-gene-154.8-mRNA-1  | Japonica | NA       |               |              |                          | RING-H2 finger protein ATL78                         |
| augustus-4-processed-gene-158.17-mRNA-1 | Japonica | NA       |               | Os04g0428300 |                          |                                                      |
| augustus-4-processed-gene-159.17-mRNA-1 | Japonica | NA       |               | Os04g0429800 | OsR498G0408584900.01.T04 | Nicotinate phosphoribosyltransferase                 |
| augustus-4-processed-gene-159.18-mRNA-1 | Japonica | NA       |               | Os04g0429900 |                          | Nicotinate phosphoribosyltransferase                 |
| augustus-4-processed-gene-159.22-mRNA-1 | Japonica | NA       |               | Os04g0430500 |                          |                                                      |
| augustus-4-processed-gene-160.37-mRNA-1 | Japonica | NA       |               | Os04g0430700 | OsR498G0408588300.01.T01 | Subtilisin-like protease                             |
| augustus-4-processed-gene-160.53-mRNA-1 | Japonica | NA       |               | Os04g0432366 | OsR498G0408597500.01.T01 | Alpha-1,4-fucosyltransferase                         |
| augustus-4-processed-gene-161.32-mRNA-1 | Japonica | Indica   |               | Os04g0433300 | OsR498G0408601300.01.T01 |                                                      |
| augustus-4-processed-gene-162.10-mRNA-1 | Japonica | NA       |               |              | OsR498G0408604500.01.T01 | PsbP domain-containing protein 2, chloroplastic      |
| augustus-4-processed-gene-168.12-mRNA-1 | Japonica | NA       |               | Os04g0444100 | OsR498G0408646700.01.T01 | C2H2 zinc finger malformed spikelet                  |
| augustus-4-processed-gene-169.39-mRNA-1 | Japonica | NA       |               | Os04g0444300 | OsR498G0408647300.01.T03 | Auxin regulated gene involved in organ size 2        |
| augustus-4-processed-gene-169.41-mRNA-1 | Japonica | NA       |               | Os04g0444600 | OsR498G0408648100.01.T02 | Proteasome component (PCI) domain                    |
| augustus-4-processed-gene-169.57-mRNA-1 | Japonica | NA       |               | Os04g0445400 | OsR498G0408650500.01.T01 | kinetochore protein SPC24 homolog                    |
| augustus-4-processed-gene-169.58-mRNA-1 | Japonica | NA       |               | Os04g0445600 | OsR498G0408651100.01.T01 | Trihelix transcription factor                        |
| augustus-4-processed-gene-169.61-mRNA-1 | Japonica | Indica   |               | Os04g0446200 | OsR498G0408653100.01.T01 | OBP3-responsive protein 4 isoform 1                  |
| augustus-4-processed-gene-171.51-mRNA-1 | Japonica | NA       |               | Os04g0448500 |                          | Peptidase A1 domain-containing protein               |
| augustus-4-processed-gene-171.69-mRNA-1 | Japonica | Japonica |               | Os04g0449800 | OsR498G0101579700.01.T01 | Gibberellin receptor GID1L2                          |
| augustus-4-processed-gene-171.70-mRNA-1 | Japonica | Indica   |               | Os04g0449900 | OsR498G0408667100.01.T02 | Polyadenylate-binding protein RBP47B                 |
| augustus-4-processed-gene-175.2-mRNA-1  | Japonica | NA       |               | Os04g0456200 | OsR498G0408687100.01.T01 | PLAT domain-containing protein 2                     |
| augustus-4-processed-gene-175.21-mRNA-1 | Japonica | Indica   |               | Os04g0457300 | OsR498G0408689100.01.T02 | Nascent polypeptide-associated complex subunit beta  |
| augustus-4-processed-gene-175.23-mRNA-1 | Japonica | NA       |               | Os04g0458000 |                          |                                                      |
| augustus-4-processed-gene-175.25-mRNA-1 | Japonica | NA       |               | Os04g0458200 | OsR498G0408691500.01.T02 | Putative WRKY transcription factor 19                |
| augustus-4-processed-gene-182.0-mRNA-1  | Japonica | Japonica | CC-NBS-TM     | Os04g0470500 | OsR498G0408741100.01.T01 | Disease resistance protein RPS2                      |
| augustus-4-processed-gene-183.27-mRNA-1 | Japonica | NA       |               | Os04g0472900 | OsR498G0408750100.01.T01 | FT-interacting protein 1                             |
| augustus-4-processed-gene-185.46-mRNA-1 | Japonica | Japonica |               | Os04g0475900 | OsR498G0408760900.01.T01 | DUF295 domain-containing protein                     |
| augustus-4-processed-gene-185.47-mRNA-1 | Japonica | NA       |               |              | OsR498G0408761100.01.T01 | DUF295 domain-containing protein                     |
| augustus-4-processed-gene-185.61-mRNA-1 | Japonica | NA       |               | Os04g0476500 |                          |                                                      |
| augustus-4-processed-gene-186.0-mRNA-1  | Japonica | Japonica |               | Os04g0477900 | OsR498G0511078900.01.T01 | AAA domain-containing protein                        |
| augustus-4-processed-gene-19.0-mRNA-1   | Japonica | NA       |               | Os04g0197100 |                          | Cysteine-rich receptor-like protein kinase 6         |
| augustus-4-processed-gene-19.9-mRNA-1   | Japonica | NA       |               |              | OsR498G0407708700.01.T01 |                                                      |
| augustus-4-processed-gene-192.20-mRNA-1 | Japonica | NA       | CC-LRR-NBS-TM | Os04g0491100 | OsR498G0408811900.01.T02 | Disease resistance RPP13-like protein 4              |
| augustus-4-processed-gene-192.23-mRNA-1 | Japonica | NA       |               | Os04g0492100 | OsR498G0408815100.01.T01 | probable E3 ubiquitin-protein ligase ARI8            |
| augustus-4-processed-gene-192.3-mRNA-1  | Japonica | NA       |               | Os04g0490700 | OsR498G0408810300.01.T01 | Chaperone protein ClpB 2                             |
| augustus-4-processed-gene-193.26-mRNA-1 | Japonica | NA       |               | Os04g0492500 | OsR498G0408817300.01.T05 | Non-specific serine/threonine protein kinase         |
| augustus-4-processed-gene-193.34-mRNA-1 | Japonica | NA       |               | Os04g0492600 | OsR498G0408817300.01.T06 | Non-specific serine/threonine protein kinase         |
| augustus-4-processed-gene-193.35-mRNA-1 | Japonica | NA       |               | Os04g0492800 | OsR498G0408817700.01.T01 | Probable calcium-binding protein CML28               |
| augustus-4-processed-gene-194.48-mRNA-1 | Japonica | NA       |               | Os04g0494800 | OsR498G0408823900.01.T01 | Putative Galactose-binding domain-containing protein |
| augustus-4-processed-gene-195.60-mRNA-1 | Japonica | Japonica |               | Os04g0497900 | OsR498G0408832900.01.T01 |                                                      |
| augustus-4-processed-gene-196.2-mRNA-1  | Japonica | NA       |               | Os04g0498600 | OsR498G0408834300.01.T04 | S-adenosylmethionine decarboxylase proenzyme         |
| augustus-4-processed-gene-197.34-mRNA-1 | Japonica | NA       |               | Os04g0502300 | OsR498G0408845600.01.T01 | 40S ribosomal protein S11                            |
| augustus-4-processed-gene-20.3-mRNA-1   | Japonica | NA       |               | Os05g0233900 |                          | TTF-type domain-containing protein                   |
| augustus-4-processed-gene-209.57-mRNA-1 | Japonica | NA       |               | Os04g0525600 | OsR498G0408931100.01.T02 | ATP-dependent Clp protease proteolytic subunit       |
| augustus-4-processed-gene-210.1-mRNA-1  | Japonica | NA       |               | Os04g0526000 | OsR498G0408933100.01.T01 | TCP transcription factor                             |
| augustus-4-processed-gene-210.3-mRNA-1  | Japonica | NA       |               | Os04g0526300 | OsR498G0408933900.01.T01 | Sulfotransferase                                     |
| augustus-4-processed-gene-218.28-mRNA-1 | Japonica | NA       |               | Os04g0541500 | OsR498G0409002300.01.T01 | Sphingoid long-chain bases kinase 1                  |
| augustus-4-processed-gene-218.39-mRNA-1 | Japonica | NA       |               |              | OsR498G0409004500.01.T01 | Senescence regulator S40                             |
| augustus-4-processed-gene-219.1-mRNA-1  | Japonica | NA       |               | Os04g0543500 | OsR498G0409009300.01.T01 | FRIGIDA interacting protein 2                        |
| augustus-4-processed-gene-219.16-mRNA-1 | Japonica | NA       |               |              | OsR498G0409011100.01.T01 | Keratin, type II cytoskeletal 79 (Fragment)          |
| augustus-4-processed-gene-220.42-mRNA-1 | Japonica | NA       |               |              | OsR498G0409018100.01.T05 | PORR domain-containing protein (Fragment)            |
| augustus-4-processed-gene-221.0-mRNA-1  | Japonica | NA       |               | Os04g0547600 | OsR498G0409022300.01.T01 | Ethylene-responsive transcription factor 5           |
| augustus-4-processed-gene-222.20-mRNA-1 | Japonica | NA       |               | Os04g0549700 | OsR498G0409030100.01.T02 | Ethylene-responsive transcription factor TINY-like   |
| augustus-4-processed-gene-222.21-mRNA-1 | Japonica | NA       |               |              | OsR498G0409030700.01.T01 | Ethylene-responsive transcription factor TINY-like   |
| augustus-4-processed-gene-222.27-mRNA-1 | Japonica | NA       |               | Os04g0550200 | OsR498G0409032100.01.T01 | Ethylene-responsive transcription factor ERF034      |
| augustus-4-processed-gene-222.28-mRNA-1 | Japonica | NA       |               | Os04g0550500 | OsR498G0409033700.01.T01 | Acetylglutamate kinase chloroplastic                 |
| augustus-4-processed-gene-223.11-mRNA-1 | Japonica | NA       |               | Os04g0552300 | OsR498G0409041500.01.T02 | Cyclin                                               |
| augustus-4-processed-gene-223.12-mRNA-1 | Japonica | NA       |               | Os04g0552400 | OsR498G0409042500.01.T01 | Cys2/His2 zinc-finger transcription factor           |
| augustus-4-processed-gene-223.13-mRNA-1 | Japonica | NA       |               | Os04g0552700 | OsR498G0409043500.01.T01 | Cys2/His2 zinc-finger transcription factor           |
| augustus-4-processed-gene-223.17-mRNA-1 | Japonica | NA       |               | Os04g0553000 | OsR498G0409045300.01.T02 | Protein TRIGALACTOSYLDIACYLGLYCEROL 1 chloroplastic  |
| augustus-4-processed-gene-223.8-mRNA-1  | Japonica | NA       |               | Os04g0551800 | OsR498G0409039700.01.T01 | CCT-alpha                                            |



|                                         |          |          |               |              |                          |                                                                             |
|-----------------------------------------|----------|----------|---------------|--------------|--------------------------|-----------------------------------------------------------------------------|
| augustus-4-processed-gene-224.13-mRNA-1 | Japonica | Japonica |               | Os04g0554600 | OsR498G0409049300.01.T01 | Proline-rich protein DC2.15                                                 |
| augustus-4-processed-gene-224.15-mRNA-1 | Japonica | NA       |               | Os04g0555000 | OsR498G0409052300.01.T01 | GRAS transcription factor                                                   |
| augustus-4-processed-gene-225.42-mRNA-1 | Japonica | NA       |               | Os04g0557000 | OsR498G0409059700.01.T03 | Genetic modifier                                                            |
| augustus-4-processed-gene-226.33-mRNA-1 | Japonica | NA       |               |              |                          | R-type basic helix-loop-helix protein                                       |
| augustus-4-processed-gene-234.18-mRNA-1 | Japonica | NA       |               | Os04g0571600 | OsR498G0409109900.01.T01 | Protein DETOXIFICATION                                                      |
| augustus-4-processed-gene-235.41-mRNA-1 | Japonica | Indica   |               | Os02g0676800 | OsR498G0409113500.01.T01 | Ethylene-responsive transcription factor ERF025                             |
| augustus-4-processed-gene-235.42-mRNA-1 | Japonica | Japonica |               | Os04g0572400 | OsR498G0204522100.01.T01 | Dehydration-responsive element-binding protein 1G                           |
| augustus-4-processed-gene-236.10-mRNA-1 | Japonica | Japonica |               | Os04g0574100 | OsR498G0612527500.01.T01 | Exostosin domain-containing protein (Fragment)                              |
| augustus-4-processed-gene-236.15-mRNA-1 | Japonica | NA       |               | Os04g0574700 | OsR498G0409122500.01.T01 | Guard cell S-type anion channel like                                        |
| augustus-4-processed-gene-237.18-mRNA-1 | Japonica | Indica   | Kinase-LRR-TM | Os04g0576900 | OsR498G0409129100.01.T01 | Probable inactive leucine-rich repeat receptor kinase XIAO                  |
| augustus-4-processed-gene-237.19-mRNA-1 | Japonica | NA       |               | Os04g0577000 | OsR498G0409129500.01.T02 | Ubiquitin fusion degradation protein UFD                                    |
| augustus-4-processed-gene-237.4-mRNA-1  | Japonica | Indica   |               | Os10g0531750 | OsR498G0408675500.01.T01 | Retrotransposon protein, putative, Ty3-gypsy sub-class                      |
| augustus-4-processed-gene-238.39-mRNA-1 | Japonica | NA       |               | Os04g0577700 | OsR498G0409132300.01.T04 | Transcription repressor                                                     |
| augustus-4-processed-gene-238.56-mRNA-1 | Japonica | NA       |               | Os04g0578400 | OsR498G0409134900.01.T01 | Aldehyde oxygenase (deformylating)                                          |
| augustus-4-processed-gene-239.17-mRNA-1 | Japonica | NA       |               | Os04g0578900 |                          | MULE domain-containing protein                                              |
| augustus-4-processed-gene-241.16-mRNA-1 | Japonica | NA       |               | Os04g0583150 | OsR498G0409160700.01.T06 | Pentatricopeptide repeat-containing protein chloroplastic                   |
| augustus-4-processed-gene-243.14-mRNA-1 | Japonica | NA       |               | Os04g0586500 | OsR498G0409175700.01.T01 | Receptor-like protein kinase FERONIA                                        |
| augustus-4-processed-gene-243.15-mRNA-1 | Japonica | NA       |               | Os04g0586700 | OsR498G0409176100.01.T01 | E3 ubiquitin-protein ligase ATL4                                            |
| augustus-4-processed-gene-243.19-mRNA-1 | Japonica | NA       |               | Os04g0587100 | OsR498G0409177300.01.T01 | PMEI domain-containing protein                                              |
| augustus-4-processed-gene-243.20-mRNA-1 | Japonica | NA       |               | Os04g0587200 | OsR498G0409177500.01.T01 | Invertase inhibitor 1                                                       |
| augustus-4-processed-gene-243.24-mRNA-1 | Japonica | Indica   |               | Os04g0587400 | OsR498G0409178500.01.T02 | Purine nucleobase transmembrane transport                                   |
| augustus-4-processed-gene-244.33-mRNA-1 | Japonica | NA       |               | Os10g0460000 | OsR498G1019116500.01.T01 |                                                                             |
| augustus-4-processed-gene-244.45-mRNA-1 | Japonica | NA       |               | Os04g0589401 |                          |                                                                             |
| augustus-4-processed-gene-244.46-mRNA-1 | Japonica | Indica   |               | Os04g0589500 | OsR498G0409185300.01.T01 | Proton-dependent oligopeptide transport family protein                      |
| augustus-4-processed-gene-244.48-mRNA-1 | Japonica | NA       |               | Os04g0589700 | OsR498G0409185900.01.T01 | RING-type E3 ubiquitin transferase                                          |
| augustus-4-processed-gene-245.12-mRNA-1 | Japonica | NA       |               | Os04g0590400 | OsR498G0409189100.01.T01 | scarecrow-like protein 9                                                    |
| augustus-4-processed-gene-247.8-mRNA-1  | Japonica | NA       |               | Os04g0594800 | OsR498G0409204100.01.T01 | Oligopeptide transporter like                                               |
| augustus-4-processed-gene-247.9-mRNA-1  | Japonica | NA       |               | Os04g0595000 | OsR498G0409204700.01.T01 | Peptidase A1 domain-containing protein (Fragment)                           |
| augustus-4-processed-gene-248.10-mRNA-1 | Japonica | Indica   |               | Os04g0597900 | OsR498G0409211100.01.T01 |                                                                             |
| augustus-4-processed-gene-248.3-mRNA-1  | Japonica | NA       |               | Os04g0597600 | OsR498G0409209900.01.T01 |                                                                             |
| augustus-4-processed-gene-248.8-mRNA-1  | Japonica | NA       |               | Os02g0212975 | OsR498G1019086300.01.T01 |                                                                             |
| augustus-4-processed-gene-248.9-mRNA-1  | Japonica | NA       |               | Os04g0597800 | OsR498G0409210900.01.T01 |                                                                             |
| augustus-4-processed-gene-249.67-mRNA-1 | Japonica | NA       |               |              | OsR498G0409219500.01.T01 |                                                                             |
| augustus-4-processed-gene-251.19-mRNA-1 | Japonica | NA       |               |              | OsR498G0409231700.01.T01 |                                                                             |
| augustus-4-processed-gene-253.53-mRNA-1 | Japonica | NA       |               |              |                          | HTH myb-type domain-containing protein                                      |
| augustus-4-processed-gene-256.1-mRNA-1  | Japonica | NA       |               | Os04g0610400 | OsR498G0409258900.01.T01 | Ethylene-responsive element binding protein homolog                         |
| augustus-4-processed-gene-256.16-mRNA-1 | Japonica | NA       |               | Os04g0611700 | OsR498G0409264300.01.T01 | Ent-kaurene synthase B                                                      |
| augustus-4-processed-gene-257.0-mRNA-1  | Japonica | NA       |               | Os04g0611800 | OsR498G0409264900.01.T05 | Ent-kaurene synthase I (Fragment)                                           |
| augustus-4-processed-gene-257.10-mRNA-1 | Japonica | Indica   |               | Os04g0612300 | OsR498G0409266300.01.T01 | AAI domain-containing protein (Fragment)                                    |
| augustus-4-processed-gene-258.13-mRNA-1 | Japonica | NA       |               |              |                          | Adenosylmethionine aminotransferase1                                        |
| augustus-4-processed-gene-260.31-mRNA-1 | Japonica | NA       |               | Os04g0616800 | OsR498G0409282900.01.T01 |                                                                             |
| augustus-4-processed-gene-260.32-mRNA-1 | Japonica | NA       |               | Os04g0616900 | OsR498G0409283300.01.T01 |                                                                             |
| augustus-4-processed-gene-260.47-mRNA-1 | Japonica | NA       |               | Os04g0618400 |                          |                                                                             |
| augustus-4-processed-gene-261.28-mRNA-1 | Japonica | NA       |               | Os04g0619300 | OsR498G0409292300.01.T01 | F-box/kelch-repeat protein At5g60570                                        |
| augustus-4-processed-gene-261.33-mRNA-1 | Japonica | NA       |               | Os04g0619900 | OsR498G0409294900.01.T01 | BAG family molecular chaperone regulator like                               |
| augustus-4-processed-gene-262.14-mRNA-1 | Japonica | Japonica | CC-NBS-TM     | Os04g0621750 | OsR498G0409301900.01.T01 | Disease resistance protein RGA2                                             |
| augustus-4-processed-gene-262.16-mRNA-1 | Japonica | Japonica |               | Os04g0621900 | OsR498G0409303900.01.T01 | BED-type domain-containing protein (Fragment)                               |
| augustus-4-processed-gene-262.8-mRNA-1  | Japonica | Japonica |               | Os04g0621300 | OsR498G0409297100.01.T04 | Disease Resistance RGA protein fragment (Pi63)                              |
| augustus-4-processed-gene-264.34-mRNA-1 | Japonica | NA       |               | Os04g0624400 | OsR498G0409310700.01.T01 | Polyphenol oxidase, chloroplastic                                           |
| augustus-4-processed-gene-265.33-mRNA-1 | Japonica | NA       |               | Os04g0625600 | OsR498G0409315900.01.T01 | Speckle-type POZ protein B                                                  |
| augustus-4-processed-gene-265.35-mRNA-1 | Japonica | NA       |               | Os04g0625700 |                          | Putative chromatin remodeling & transcription regulator BTB-POZ-MATH family |
| augustus-4-processed-gene-265.36-mRNA-1 | Japonica | NA       |               | Os04g0625800 | OsR498G0409316900.01.T03 | Polyadenylate-binding protein RBP45C                                        |
| augustus-4-processed-gene-266.66-mRNA-1 | Japonica | NA       |               | Os04g0628700 | OsR498G0409325300.01.T03 | Peroxisome biogenesis protein 22                                            |
| augustus-4-processed-gene-266.67-mRNA-1 | Japonica | Japonica |               | Os04g0628800 | OsR498G0409325300.01.T01 | Cyclin                                                                      |
| augustus-4-processed-gene-268.79-mRNA-1 | Japonica | Japonica | Kinase-TM     | Os04g0633800 | OsR498G0409334600.01.T02 | Non-specific serine/threonine protein kinase                                |
| augustus-4-processed-gene-271.17-mRNA-1 | Japonica | NA       |               | Os04g0640900 | OsR498G0409355300.01.T01 | Putative WRKY transcription factor 19                                       |
| augustus-4-processed-gene-271.20-mRNA-1 | Japonica | NA       |               | Os04g0641300 |                          | Glutaredoxin                                                                |
| augustus-4-processed-gene-273.58-mRNA-1 | Japonica | NA       |               | Os04g0643700 | OsR498G0409364700.01.T04 | Pentatricopeptide repeat-containing protein mitochondrial                   |
| augustus-4-processed-gene-274.2-mRNA-1  | Japonica | NA       |               | Os04g0645500 |                          | Methyltransferase-16                                                        |
| augustus-4-processed-gene-275.33-mRNA-1 | Japonica | NA       | LRR-TM        |              |                          | Phytosulfokine receptor 1                                                   |
| augustus-4-processed-gene-275.39-mRNA-1 | Japonica | NA       |               | Os04g0648600 | OsR498G0409380300.01.T01 |                                                                             |

|                                         |          |          |               |              |                          |                                                            |
|-----------------------------------------|----------|----------|---------------|--------------|--------------------------|------------------------------------------------------------|
| augustus-4-processed-gene-276.11-mRNA-1 | Japonica | NA       |               | Os04g0649900 | OsR498G0409389300.01.T01 | Glucuronoxylan 4-O-methyltransferase 3                     |
| augustus-4-processed-gene-277.63-mRNA-1 | Japonica | Indica   |               | Os04g0650700 | OsR498G0409393500.01.T01 | Isoaspartyl peptidase/L-asparaginase                       |
| augustus-4-processed-gene-277.65-mRNA-1 | Japonica | NA       |               |              | OsR498G0409395100.01.T01 | Wall-associated receptor kinase 2                          |
| augustus-4-processed-gene-279.43-mRNA-1 | Japonica | Japonica | Kinase-TM     | Os04g0655000 | OsR498G0409408100.01.T01 | Serine/threonine-protein kinase                            |
| augustus-4-processed-gene-281.13-mRNA-1 | Japonica | NA       |               | Os04g0658100 | OsR498G0409419300.01.T06 | Transcriptional regulator of RNA polII, SAGA, subunit      |
| augustus-4-processed-gene-282.9-mRNA-1  | Japonica | NA       |               |              | OsR498G0409426700.01.T05 |                                                            |
| augustus-4-processed-gene-284.33-mRNA-1 | Japonica | NA       |               | Os04g0662800 | OsR498G0409436100.01.T01 | E3 ubiquitin-protein ligase HERC2                          |
| augustus-4-processed-gene-289.0-mRNA-1  | Japonica | NA       |               | Os04g0672800 | OsR498G0409471300.01.T02 | Peroxisome biogenesis protein 22                           |
| augustus-4-processed-gene-290.57-mRNA-1 | Japonica | NA       |               | Os04g0674400 | OsR498G0409505400.01.T01 | Anamorsin homolog                                          |
| augustus-4-processed-gene-291.12-mRNA-1 | Japonica | NA       |               | Os04g0677600 |                          |                                                            |
| augustus-4-processed-gene-293.51-mRNA-1 | Japonica | NA       |               |              | OsR498G0409501500.01.T01 | Allantoinase                                               |
| augustus-4-processed-gene-293.70-mRNA-1 | Japonica | NA       |               | Os04g0681800 |                          |                                                            |
| augustus-4-processed-gene-295.1-mRNA-1  | Japonica | Indica   | Kinase-TM     | Os04g0684200 | OsR498G0409514300.01.T06 | CASP-like protein 1                                        |
| augustus-4-processed-gene-295.13-mRNA-1 | Japonica | Indica   |               | Os04g0684900 | OsR498G0409516900.01.T01 | Poly(A)-specific ribonuclease                              |
| augustus-4-processed-gene-295.9-mRNA-1  | Japonica | Indica   |               | Os04g0684400 | OsR498G0409515700.01.T01 |                                                            |
| augustus-4-processed-gene-296.36-mRNA-1 | Japonica | NA       |               | Os04g0686800 | OsR498G0409525900.01.T01 | Vacuolar iron transporter                                  |
| augustus-4-processed-gene-297.16-mRNA-1 | Japonica | NA       |               | Os04g0687800 | OsR498G0409528100.01.T01 | Plant-drug/metabolite exporter                             |
| augustus-4-processed-gene-297.18-mRNA-1 | Japonica | NA       |               | Os04g0688000 | OsR498G0409529300.01.T01 | DUF793 domain-containing protein                           |
| augustus-4-processed-gene-299.19-mRNA-1 | Japonica | NA       |               | Os04g0691800 | OsR498G0409540700.01.T01 | FT-interacting protein 1                                   |
| augustus-4-processed-gene-299.29-mRNA-1 | Japonica | NA       |               |              | OsR498G0409538800.01.T02 | DDB1-and CUL4-associated factor-like protein 1             |
| augustus-4-processed-gene-299.4-mRNA-1  | Japonica | NA       |               | Os04g0691000 |                          | F-box domain-containing protein                            |
| augustus-4-processed-gene-3.15-mRNA-1   | Japonica | NA       |               | Os04g0175400 | OsR498G0407633900.01.T01 |                                                            |
| augustus-4-processed-gene-35.36-mRNA-1  | Japonica | NA       | Kinase-LRR-TM |              |                          | Leucine-rich repeat protein kinase family protein          |
| augustus-4-processed-gene-5.20-mRNA-1   | Japonica | NA       |               | Os04g0178300 | OsR498G0407643700.01.T01 | Syn-copalyl diphosphate synthase                           |
| augustus-4-processed-gene-59.5-mRNA-1   | Japonica | NA       |               | Os04g0272700 | OsR498G0407907100.01.T01 | Glycosyltransferase                                        |
| augustus-4-processed-gene-65.0-mRNA-1   | Japonica | Indica   |               | Os02g0461500 | OsR498G0407938700.01.T01 | FAS1 domain-containing protein                             |
| augustus-4-processed-gene-66.2-mRNA-1   | Japonica | NA       |               | Os05g0234700 |                          | Retrotransposon protein, putative, unclassified            |
| augustus-4-processed-gene-7.13-mRNA-1   | Japonica | NA       |               | Os04g0180900 |                          |                                                            |
| augustus-4-processed-gene-72.16-mRNA-1  | Japonica | NA       |               | Os04g0295000 | OsR498G0407959000.01.T02 | Type 1 phosphatases regulator like                         |
| augustus-4-processed-gene-74.12-mRNA-1  | Japonica | NA       |               | Os04g0297800 | OsR498G0407971100.01.T01 | Bifunctional hemolysin/adenylate cyclase                   |
| augustus-4-processed-gene-76.18-mRNA-1  | Japonica | NA       |               | Os04g0300175 |                          | ATP-dependent DNA helicase                                 |
| augustus-4-processed-gene-8.6-mRNA-1    | Japonica | NA       |               |              |                          |                                                            |
| augustus-4-processed-gene-80.14-mRNA-1  | Japonica | NA       |               | Os04g0305700 | OsR498G0408009100.01.T01 | Glycosyltransferase                                        |
| augustus-4-processed-gene-81.17-mRNA-1  | Japonica | NA       |               | Os04g0306400 | OsR498G0408010700.01.T01 | Ribose-5-phosphate isomerase                               |
| augustus-4-processed-gene-82.4-mRNA-1   | Japonica | Japonica | Kinase-TM     | Os04g0307900 | OsR498G0408016900.01.T01 | Wall-associated receptor kinase 5                          |
| augustus-4-processed-gene-82.5-mRNA-1   | Japonica | NA       | Kinase-TM     |              |                          | Wall-associated receptor kinase 3                          |
| augustus-4-processed-gene-83.5-mRNA-1   | Japonica | NA       |               |              |                          |                                                            |
| augustus-5-processed-gene-10.31-mRNA-1  | Japonica | Japonica |               | Os05g0120000 | OsR498G0509618600.01.T01 | ABC transporter G family member 6                          |
| augustus-5-processed-gene-10.34-mRNA-1  | Japonica | NA       |               | Os10g0460000 | OsR498G1019116500.01.T01 |                                                            |
| augustus-5-processed-gene-11.16-mRNA-1  | Japonica | NA       |               | Os05g0120900 | OsR498G0509622800.01.T01 | probable membrane-associated kinase regulator 4            |
| augustus-5-processed-gene-12.45-mRNA-1  | Japonica | NA       |               | Os05g0122500 | OsR498G0509629600.01.T01 | PWWP domain-containing protein (Fragment)                  |
| augustus-5-processed-gene-13.33-mRNA-1  | Japonica | NA       |               | Os05g0124000 | OsR498G0509638000.01.T02 |                                                            |
| augustus-5-processed-gene-14.7-mRNA-1   | Japonica | Indica   |               | Os05g0124000 | OsR498G0509641800.01.T05 |                                                            |
| augustus-5-processed-gene-141.37-mRNA-1 | Japonica | NA       |               | Os05g0305300 | OsR498G0510413000.01.T01 | Pentatricopeptide repeat                                   |
| augustus-5-processed-gene-141.59-mRNA-1 | Japonica | NA       |               | Os05g0305700 | OsR498G0510414000.01.T01 | Homeobox protein SIX3-like isoform X2                      |
| augustus-5-processed-gene-145.12-mRNA-1 | Japonica | NA       |               |              | OsR498G0510430800.01.T01 | Hydroxyproline-rich glycoprotein-like protein              |
| augustus-5-processed-gene-147.9-mRNA-1  | Japonica | Indica   |               | Os03g0356900 | OsR498G0510442200.01.T01 | Adenylate isopentenyltransferase                           |
| augustus-5-processed-gene-148.47-mRNA-1 | Japonica | NA       |               | Os05g0313700 | OsR498G0510453400.01.T01 | NET domain-containing protein                              |
| augustus-5-processed-gene-149.15-mRNA-1 | Japonica | NA       |               | Os05g0315401 |                          | Transposon protein, putative, Mutator sub-class, expressed |
| augustus-5-processed-gene-149.16-mRNA-1 | Japonica | NA       |               | Os05g0314700 | OsR498G0510463400.01.T01 | Fanconi anemia group I protein isoform X1                  |
| augustus-5-processed-gene-15.32-mRNA-1  | Japonica | Indica   |               | Os01g0881800 | OsR498G0509652400.01.T01 |                                                            |
| augustus-5-processed-gene-151.23-mRNA-1 | Japonica | NA       |               | Os05g0317200 | OsR498G0510474100.01.T03 | Long-chain-fatty-acid--CoA ligase 3                        |
| augustus-5-processed-gene-152.17-mRNA-1 | Japonica | NA       | Kinase-TM     |              | OsR498G0510479400.01.T04 | Receptor-like protein kinase FERONIA                       |
| augustus-5-processed-gene-152.19-mRNA-1 | Japonica | NA       | Kinase-TM     |              | OsR498G0510480600.01.T01 | Receptor-like protein kinase FERONIA                       |
| augustus-5-processed-gene-153.24-mRNA-1 | Japonica | Japonica |               | Os05g0319800 | OsR498G0510483600.01.T01 | Plasma membrane ATPase                                     |
| augustus-5-processed-gene-153.25-mRNA-1 | Japonica | NA       |               | Os05g0319900 | OsR498G0510483800.01.T01 | GH10 domain-containing protein                             |
| augustus-5-processed-gene-153.26-mRNA-1 | Japonica | NA       |               | Os05g0320100 | OsR498G0510484400.01.T03 | F-box domain containing protein, expressed                 |
| augustus-5-processed-gene-16.30-mRNA-1  | Japonica | NA       |               | Os05g0128400 | OsR498G0509662200.01.T03 | Metal tolerance protein 1                                  |
| augustus-5-processed-gene-17.8-mRNA-1   | Japonica | NA       |               | Os05g0129000 | OsR498G0509662700.01.T04 | Glutamate--cysteine ligase A, chloroplastic                |
| augustus-5-processed-gene-18.35-mRNA-1  | Japonica | NA       |               |              | OsR498G0509669200.01.T01 | Zinc finger, RanBP2-type                                   |
| augustus-5-processed-gene-18.60-mRNA-1  | Japonica | NA       |               |              | OsR498G0408652000.01.T01 | CIA30 domain-containing protein                            |

|                                         |          |          |        |              |                           |                                                                            |
|-----------------------------------------|----------|----------|--------|--------------|---------------------------|----------------------------------------------------------------------------|
| augustus-5-processed-gene-194.45-mRNA-1 | Japonica | Japonica |        | Os05g0382550 | OsR498G0612562800.01.T01  |                                                                            |
| augustus-5-processed-gene-195.28-mRNA-1 | Japonica | NA       |        | Os05g0384300 | OsR498G0510745600.01.T01  | Peptidase A1 domain-containing protein                                     |
| augustus-5-processed-gene-195.29-mRNA-1 | Japonica | NA       | NBS-TM | Os05g0384600 | OsR498G0510747200.01.T01  | ATPase, coupled to transmembrane movement of substances                    |
| augustus-5-processed-gene-199.0-mRNA-1  | Japonica | NA       |        | Os05g0390600 |                           | probable membrane-associated kinase regulator 1                            |
| augustus-5-processed-gene-199.1-mRNA-1  | Japonica | NA       |        | Os05g0390800 | OsR498G0510767800.01.T01  | VQ domain-containing protein (Fragment)                                    |
| augustus-5-processed-gene-199.7-mRNA-1  | Japonica | NA       |        |              |                           | RMUA                                                                       |
| augustus-5-processed-gene-201.32-mRNA-1 | Japonica | NA       |        | Os05g0395000 | OsR498G0510782000.01.T03  | Peptide-N4-(N-acetyl-beta-glucosaminyl)asparagine amidase A                |
| augustus-5-processed-gene-202.19-mRNA-1 | Japonica | NA       |        |              |                           |                                                                            |
| augustus-5-processed-gene-202.25-mRNA-1 | Japonica | NA       |        | Os05g0396900 | OsR498G0510787600.01.T01  | Gelation factor like                                                       |
| augustus-5-processed-gene-204.46-mRNA-1 | Japonica | NA       | LRR-TM | Os05g0399800 | OsR498G0510794200.01.T01  | Inactive LRR receptor-like serine/threonine-protein kinase BIR2            |
| augustus-5-processed-gene-205.29-mRNA-1 | Japonica | NA       |        |              | OsR498G0510801000.01.T01  |                                                                            |
| augustus-5-processed-gene-206.10-mRNA-1 | Japonica | NA       |        | Os05g0403400 | OsR498G0510803600.01.T01  | mTERF transcription factor (Fragment)                                      |
| augustus-5-processed-gene-206.11-mRNA-1 | Japonica | NA       |        | Os05g0403600 | OsR498G0510804000.01.T01  | mTERF transcription factor (Fragment)                                      |
| augustus-5-processed-gene-208.36-mRNA-1 | Japonica | NA       |        | Os05g0404600 | OsR498G0510805800.01.T01  | Methyl-CpG-binding domain-containing protein 4                             |
| augustus-5-processed-gene-208.37-mRNA-1 | Japonica | NA       |        | Os05g0404700 | OsR498G0510806000.01.T01  | Methyl-CpG-binding domain-containing protein 1                             |
| augustus-5-processed-gene-208.51-mRNA-1 | Japonica | NA       |        | Os12g0501100 | OsR498G0613150400.01.T01  | Protein-serine/threonine phosphatase                                       |
| augustus-5-processed-gene-209.36-mRNA-1 | Japonica | NA       |        | Os05g0406600 | OsR498G0510812600.01.T01  |                                                                            |
| augustus-5-processed-gene-210.25-mRNA-1 | Japonica | NA       |        | Os05g0409000 | OsR498G0510821800.01.T01  | UBA domain-containing protein (Fragment)                                   |
| augustus-5-processed-gene-210.5-mRNA-1  | Japonica | NA       |        | Os05g0407900 | OsR498G0510818600.01.T04  | Pentatricopeptide repeat                                                   |
| augustus-5-processed-gene-217.37-mRNA-1 | Japonica | NA       |        |              | OsR498G0510862200.01.T01  | Ethylene-responsive transcription factor ERF020                            |
| augustus-5-processed-gene-217.56-mRNA-1 | Japonica | Japonica |        | Os05g0420900 | OsR498G0203891300.01.T01  |                                                                            |
| augustus-5-processed-gene-218.24-mRNA-1 | Japonica | NA       |        |              | OsR498G0306294300.01.T01  | Oxidoreductase, 2OG-Fe oxygenase family protein, expressed                 |
| augustus-5-processed-gene-219.17-mRNA-1 | Japonica | NA       |        | Os05g0424300 | OsR498G0510875200.01.T01  | Flavonoid 3'-monooxygenase                                                 |
| augustus-5-processed-gene-22.36-mRNA-1  | Japonica | Japonica |        | Os05g0139200 | OsR498G0509702800.01.T01  | Putative receptor kinase                                                   |
| augustus-5-processed-gene-220.45-mRNA-1 | Japonica | Japonica |        | Os05g0427400 | OsR498G0204355400.01.T01  | Phenylalanine ammonia-lyase                                                |
| augustus-5-processed-gene-221.26-mRNA-1 | Japonica | Japonica |        | Os05g0428800 | OsR498G0510892400.01.T01  | Glycosyltransferase                                                        |
| augustus-5-processed-gene-222.3-mRNA-1  | Japonica | NA       |        | Os05g0429700 | OsR498G0510895200.01.T01  | FT-interacting protein 1                                                   |
| augustus-5-processed-gene-227.10-mRNA-1 | Japonica | Indica   |        | Os05g0440100 | OsR498G0510928400.01.T02  | Histone deacetylase                                                        |
| augustus-5-processed-gene-227.18-mRNA-1 | Japonica | Indica   |        | Os10g0326400 | OsR498G05059612600.01.T01 | F-box domain containing protein, expressed                                 |
| augustus-5-processed-gene-227.20-mRNA-1 | Japonica | Indica   |        | Os05g0441400 | OsR498G0510930400.01.T01  | Transcription repressor                                                    |
| augustus-5-processed-gene-23.16-mRNA-1  | Japonica | Indica   |        | Os05g0141200 | OsR498G0509711600.01.T02  | VQ domain-containing protein                                               |
| augustus-5-processed-gene-23.18-mRNA-1  | Japonica | Japonica |        | Os05g0141300 | OsR498G0713871400.01.T01  | (Z)-3-hexen-1-ol acetyltransferase                                         |
| augustus-5-processed-gene-23.20-mRNA-1  | Japonica | NA       |        | Os05g0141500 | OsR498G0509713200.01.T03  | E3 ubiquitin-protein like                                                  |
| augustus-5-processed-gene-230.35-mRNA-1 | Japonica | NA       |        | Os05g0447000 | OsR498G0510949800.01.T01  | Pleckstrin like domain-containing protein 1                                |
| augustus-5-processed-gene-230.37-mRNA-1 | Japonica | NA       |        | Os05g0447200 | OsR498G0510950000.01.T01  | Auxin transporter protein 1                                                |
| augustus-5-processed-gene-231.43-mRNA-1 | Japonica | NA       |        | Os05g0449200 | OsR498G0510954600.01.T01  | BAHD acyltransferase DCR                                                   |
| augustus-5-processed-gene-234.2-mRNA-1  | Japonica | NA       |        |              |                           | Retrotransposon protein, putative, unclassified, expressed                 |
| augustus-5-processed-gene-238.4-mRNA-1  | Japonica | NA       |        | Os05g0462700 | OsR498G0510997800.01.T01  | Multifunctional fusion protein                                             |
| augustus-5-processed-gene-24.41-mRNA-1  | Japonica | NA       |        | Os05g0142600 |                           |                                                                            |
| augustus-5-processed-gene-242.44-mRNA-1 | Japonica | NA       |        | Os05g0471100 | OsR498G0511022200.01.T01  | Glutaredoxin domain-containing cysteine-rich protein 1                     |
| augustus-5-processed-gene-243.31-mRNA-1 | Japonica | NA       |        | Os05g0473500 | OsR498G0511029000.01.T02  | Exocyst subunit exo70 family protein B2                                    |
| augustus-5-processed-gene-244.42-mRNA-1 | Japonica | Indica   |        | Os05g0475400 | OsR498G0511033800.01.T01  | Alanine--glyoxylate aminotransferase 2                                     |
| augustus-5-processed-gene-245.27-mRNA-1 | Japonica | NA       |        |              | OsR498G0511043200.01.T01  | RING-H2 finger protein ATL1N                                               |
| augustus-5-processed-gene-246.7-mRNA-1  | Japonica | NA       |        |              | OsR498G0511046600.01.T01  |                                                                            |
| augustus-5-processed-gene-247.79-mRNA-1 | Japonica | NA       |        |              | OsR498G0511056000.01.T01  |                                                                            |
| augustus-5-processed-gene-248.2-mRNA-1  | Japonica | Japonica |        | Os05g0481900 | OsR498G0511058000.01.T02  | PIN-formed protein14                                                       |
| augustus-5-processed-gene-248.35-mRNA-1 | Japonica | NA       |        |              | OsR498G1119312200.01.T01  |                                                                            |
| augustus-5-processed-gene-250.30-mRNA-1 | Japonica | NA       |        | Os05g0486200 | OsR498G0511076000.01.T01  | Dolichyl-diphosphooligosaccharide--protein glycosyltransferase subunit KCP |
| augustus-5-processed-gene-251.63-mRNA-1 | Japonica | NA       |        | Os05g0488800 | OsR498G0511080200.01.T03  | RING-type E3 ubiquitin transferase                                         |
| augustus-5-processed-gene-252.18-mRNA-1 | Japonica | NA       |        | Os05g0490400 | OsR498G0511085200.01.T01  |                                                                            |
| augustus-5-processed-gene-252.21-mRNA-1 | Japonica | NA       |        | Os05g0490700 | OsR498G0511085800.01.T02  | Histone-lysine N-methyltransferase H3 lysine-9 specific SUVH3              |
| augustus-5-processed-gene-252.8-mRNA-1  | Japonica | NA       |        | Os05g0490000 |                           | KRR1-interacting protein involved in 40S ribosome biogenesis               |
| augustus-5-processed-gene-254.54-mRNA-1 | Japonica | NA       |        |              | OsR498G0511098600.01.T03  | RING-type E3 ubiquitin transferase                                         |
| augustus-5-processed-gene-254.55-mRNA-1 | Japonica | NA       |        | Os05g0495200 | OsR498G0511099200.01.T03  | BZIP transcription factor                                                  |
| augustus-5-processed-gene-255.29-mRNA-1 | Japonica | NA       |        |              | OsR498G0511103200.01.T01  |                                                                            |
| augustus-5-processed-gene-255.34-mRNA-1 | Japonica | NA       |        | Os05g0497300 | OsR498G0511105200.01.T01  | Ethylene-responsive transcription factor 4                                 |
| augustus-5-processed-gene-256.29-mRNA-1 | Japonica | NA       |        | Os05g0498200 | OsR498G0511109000.01.T01  | Sonic hedgehog protein A                                                   |
| augustus-5-processed-gene-256.34-mRNA-1 | Japonica | NA       |        |              | OsR498G0511100000.01.T01  |                                                                            |
| augustus-5-processed-gene-256.37-mRNA-1 | Japonica | NA       |        |              | OsR498G0917893100.01.T01  | Trypsin                                                                    |
| augustus-5-processed-gene-257.14-mRNA-1 | Japonica | NA       |        | Os10g0460000 | OsR498G0305532000.01.T01  | Kinesin heavy chain-like                                                   |
| augustus-5-processed-gene-260.3-mRNA-1  | Japonica | NA       |        |              | OsR498G0511135400.01.T01  | DUF834 domain-containing protein                                           |

|                                         |          |          |           |              |                           |                                                                       |
|-----------------------------------------|----------|----------|-----------|--------------|---------------------------|-----------------------------------------------------------------------|
| augustus-5-processed-gene-264.47-mRNA-1 | Japonica | NA       |           | Os05g0510600 | OsR498G0511162200.01.T01  | Tyrosine decarboxylase                                                |
| augustus-5-processed-gene-264.67-mRNA-1 | Japonica | NA       |           | Os05g0511300 | OsR498G0511165400.01.T02  | Carnosine N-methyltransferase                                         |
| augustus-5-processed-gene-266.40-mRNA-1 | Japonica | Indica   |           | Os05g0514600 | OsR498G0511177800.01.T03  | Gibberellin 2-beta-dioxygenase                                        |
| augustus-5-processed-gene-266.41-mRNA-1 | Japonica | Indica   |           | Os05g0514600 | OsR498G0511177800.01.T03  | Gibberellin 2-beta-dioxygenase                                        |
| augustus-5-processed-gene-267.54-mRNA-1 | Japonica | NA       |           | Os05g0515600 | OsR498G0511181400.01.T01  | O-methyltransferase ZRP4                                              |
| augustus-5-processed-gene-269.56-mRNA-1 | Japonica | NA       |           | Os05g0519800 |                           | probable transcriptional regulatory protein At2g25830                 |
| augustus-5-processed-gene-27.10-mRNA-1  | Japonica | NA       |           | Os05g0147800 |                           | BED-type domain-containing protein                                    |
| augustus-5-processed-gene-27.9-mRNA-1   | Japonica | NA       |           | Os05g0147700 | OsR498G0509734200.01.T01  |                                                                       |
| augustus-5-processed-gene-271.36-mRNA-1 | Japonica | NA       |           | Os05g0522700 | OsR498G0511207200.01.T01  |                                                                       |
| augustus-5-processed-gene-271.37-mRNA-1 | Japonica | NA       |           | Os10g0531750 | OsR498G1120733700.01.T01  | Retrotransposon protein, putative, Ty3-gypsy sub-class                |
| augustus-5-processed-gene-272.36-mRNA-1 | Japonica | NA       |           | Os05g0525900 | OsR498G0511216000.01.T01  | C3H transcription factor                                              |
| augustus-5-processed-gene-273.35-mRNA-1 | Japonica | NA       |           | Os05g0527000 | OsR498G0511218600.01.T01  | Glycosyltransferase                                                   |
| augustus-5-processed-gene-273.36-mRNA-1 | Japonica | NA       |           | Os05g0527100 | OsR498G0511219800.01.T01  | Glycosyltransferase                                                   |
| augustus-5-processed-gene-273.52-mRNA-1 | Japonica | Japonica |           | Os05g0527400 | OsR498G0511221000.01.T01  | Glycosyltransferase                                                   |
| augustus-5-processed-gene-273.55-mRNA-1 | Japonica | Japonica |           | Os05g0527700 | OsR498G0511221000.01.T01  | Glycosyltransferase                                                   |
| augustus-5-processed-gene-273.58-mRNA-1 | Japonica | NA       |           |              |                           | Respiratory burst oxidase protein B variant beta                      |
| augustus-5-processed-gene-28.60-mRNA-1  | Japonica | NA       |           | Os05g0149300 | OsR498G0509738700.01.T01  | 1-aminocyclopropane-1-carboxylate oxidase                             |
| augustus-5-processed-gene-285.14-mRNA-1 | Japonica | NA       |           | Os05g0552200 | OsR498G0511303400.01.T01  | Hexosyltransferase                                                    |
| augustus-5-processed-gene-285.2-mRNA-1  | Japonica | Japonica |           | Os05g0551700 | OsR498G0101792300.01.T01  | Adenylate isopentenyltransferase                                      |
| augustus-5-processed-gene-299.66-mRNA-1 | Japonica | NA       |           | Os05g0579300 | OsR498G0511400300.01.T01  | Zinc-finger homeodomain protein 6                                     |
| augustus-5-processed-gene-300.24-mRNA-1 | Japonica | NA       |           | Os05g0582000 | OsR498G0511409400.01.T01  | Plant basic secretory protein (BSP) family protein                    |
| augustus-5-processed-gene-300.9-mRNA-1  | Japonica | NA       |           | Os08g0106900 | OsR498G0511404600.01.T01  | Transposon protein, putative, CACTA, En/Spm sub-class                 |
| augustus-5-processed-gene-305.4-mRNA-1  | Japonica | Japonica |           | Os05g0590000 | OsR498G0101471900.01.T01  | Peptidase A1 domain-containing protein (Fragment)                     |
| augustus-5-processed-gene-306.77-mRNA-1 | Japonica | NA       |           | Os05g0593900 | OsR498G0511448600.01.T01  | Vacuolar-processing enzyme gamma-isozyme                              |
| augustus-5-processed-gene-307.45-mRNA-1 | Japonica | NA       |           | Os05g0594200 | OsR498G0511449400.01.T01  | Vacuolar cation/proton exchanger                                      |
| augustus-5-processed-gene-31.10-mRNA-1  | Japonica | NA       |           | Os05g0154600 | OsR498G0509766800.01.T01  | E3 ubiquitin-protein ligase RFI2                                      |
| augustus-5-processed-gene-32.51-mRNA-1  | Japonica | Japonica |           | Os05g0155400 | OsR498G0100884100.01.T02  | GATA-type domain-containing protein                                   |
| augustus-5-processed-gene-33.67-mRNA-1  | Japonica | NA       |           |              | OsR498G0204960100.01.T01  |                                                                       |
| augustus-5-processed-gene-35.37-mRNA-1  | Japonica | NA       |           | Os05g0160300 | OsR498G05097788400.01.T01 | AAI domain-containing protein (Fragment)                              |
| augustus-5-processed-gene-36.27-mRNA-1  | Japonica | NA       |           | Os05g0163300 | OsR498G0509798800.01.T02  | FAS1 domain-containing protein (Fragment)                             |
| augustus-5-processed-gene-39.57-mRNA-1  | Japonica | NA       |           | Os05g0168500 | OsR498G0509820600.01.T01  | Transmembrane 9 superfamily member                                    |
| augustus-5-processed-gene-46.7-mRNA-1   | Japonica | NA       |           | Os05g0177500 | OsR498G0509850800.01.T01  | Glycosyltransferase                                                   |
| augustus-5-processed-gene-47.20-mRNA-1  | Japonica | NA       | LRR-TM    | Os05g0180300 | OsR498G0509866000.01.T01  | Leucine-rich repeat extensin-like protein 3                           |
| augustus-5-processed-gene-49.36-mRNA-1  | Japonica | NA       |           |              | OsR498G0306050700.01.T01  | Transposon protein, putative, Mutator sub-class                       |
| augustus-5-processed-gene-5.23-mRNA-1   | Japonica | Japonica |           | Os05g0109100 | OsR498G0509581600.01.T01  |                                                                       |
| augustus-5-processed-gene-5.3-mRNA-1    | Japonica | NA       | CC-Kinase | Os05g0108300 | OsR498G0509579900.01.T01  | Non-specific serine/threonine protein kinase                          |
| augustus-5-processed-gene-6.47-mRNA-1   | Japonica | NA       |           | Os05g0110400 |                           | Scarecrow-like protein 9 isoform A                                    |
| augustus-5-processed-gene-67.2-mRNA-1   | Japonica | NA       |           | Os05g0209000 |                           |                                                                       |
| augustus-5-processed-gene-67.20-mRNA-1  | Japonica | NA       |           | Os05g0209300 | OsR498G0509996000.01.T01  | E3 ubiquitin-protein ligase ATL9                                      |
| augustus-5-processed-gene-68.23-mRNA-1  | Japonica | NA       |           | Os02g0711400 | OsR498G1220919400.01.T01  | RING-type domain-containing protein                                   |
| augustus-5-processed-gene-69.16-mRNA-1  | Japonica | NA       |           | Os05g0212900 | OsR498G0510009000.01.T01  | Chalcone and stilbene synthases, N-terminal domain containing protein |
| augustus-5-processed-gene-7.13-mRNA-1   | Japonica | NA       |           | Os05g0112750 | OsR498G0509596200.01.T01  | Embryo defective                                                      |
| augustus-5-processed-gene-7.14-mRNA-1   | Japonica | NA       |           | Os05g0112800 | OsR498G0509596400.01.T01  | cysteine-rich repeat secretory protein 55                             |
| augustus-5-processed-gene-75.3-mRNA-1   | Japonica | NA       |           | Os03g0110200 |                           | Transposon protein, putative, Mutator sub-class                       |
| augustus-5-processed-gene-82.16-mRNA-1  | Japonica | NA       |           | Os05g0233900 |                           |                                                                       |
| augustus-5-processed-gene-85.45-mRNA-1  | Japonica | NA       |           | Os05g0238400 | OsR498G0510112800.01.T01  | Glycine-rich protein family                                           |
| augustus-5-processed-gene-85.47-mRNA-1  | Japonica | NA       |           | Os05g0239150 |                           | Zinc finger BED domain-containing protein DAYSLEEPER                  |
| augustus-5-processed-gene-86.37-mRNA-1  | Japonica | NA       |           |              | OsR498G0203809100.01.T01  | DUF834 domain-containing protein                                      |
| augustus-5-processed-gene-87.38-mRNA-1  | Japonica | NA       |           | Os05g0242600 | OsR498G0510126400.01.T01  |                                                                       |
| augustus-5-processed-gene-87.40-mRNA-1  | Japonica | NA       |           |              |                           |                                                                       |
| augustus-5-processed-gene-89.36-mRNA-1  | Japonica | NA       |           |              | OsR498G0510294600.01.T01  | Zinc knuckle containing protein-like                                  |
| augustus-5-processed-gene-89.48-mRNA-1  | Japonica | NA       |           | Os05g0247100 | OsR498G0510133000.01.T02  | Xylanase inhibitor protein XIP                                        |
| augustus-5-processed-gene-9.33-mRNA-1   | Japonica | Indica   |           | Os10g0326400 | OsR498G0509612600.01.T01  | F-box domain containing protein, expressed                            |
| augustus-5-processed-gene-9.9-mRNA-1    | Japonica | NA       |           | Os05g0116600 | OsR498G0509609000.01.T01  | F-box protein interaction domain containing protein                   |
| augustus-5-processed-gene-92.27-mRNA-1  | Japonica | Japonica |           | Os05g0251200 | OsR498G0510143400.01.T01  | DUF1618 domain-containing protein (Fragment)                          |
| augustus-5-processed-gene-92.6-mRNA-1   | Japonica | NA       |           |              | OsR498G0510148400.01.T01  |                                                                       |
| augustus-5-processed-gene-94.24-mRNA-1  | Japonica | NA       |           |              | OsR498G0510162000.01.T01  |                                                                       |
| augustus-5-processed-gene-95.48-mRNA-1  | Japonica | NA       |           | Os05g0256033 |                           |                                                                       |
| augustus-5-processed-gene-96.25-mRNA-1  | Japonica | Indica   |           | Os05g0360900 | OsR498G0510171400.01.T01  |                                                                       |
| augustus-6-processed-gene-106.26-mRNA-1 | Japonica | NA       |           |              | OsR498G0612182100.01.T01  | Embryogenesis transmembrane protein-like                              |
| augustus-6-processed-gene-112.27-mRNA-1 | Japonica | NA       |           | Os06g0305200 | OsR498G0612219700.01.T01  | Nuclear pore complex protein NUP155                                   |

|                                         |          |          |               |              |                          |                                                                  |
|-----------------------------------------|----------|----------|---------------|--------------|--------------------------|------------------------------------------------------------------|
| augustus-6-processed-gene-120.40-mRNA-1 | Japonica | NA       |               | Os06g0318200 | OsR498G0612270500.01.T03 | BTB/POZ domain-containing protein At2g04740                      |
| augustus-6-processed-gene-124.5-mRNA-1  | Japonica | Indica   |               | Os02g0716800 | OsR498G0612283100.01.T01 | Peptide transporter PTR1                                         |
| augustus-6-processed-gene-134.19-mRNA-1 | Japonica | NA       |               |              | OsR498G0612526300.01.T01 | Putative K domain-containing protein                             |
| augustus-6-processed-gene-155.34-mRNA-1 | Japonica | NA       |               |              | OsR498G0612423700.01.T01 |                                                                  |
| augustus-6-processed-gene-159.6-mRNA-1  | Japonica | NA       |               | Os06g0475800 |                          |                                                                  |
| augustus-6-processed-gene-164.11-mRNA-1 | Japonica | NA       |               |              |                          | Retrotransposon protein, putative, LINE subclass                 |
| augustus-6-processed-gene-171.32-mRNA-1 | Japonica | Indica   |               | Os06g0494400 | OsR498G0612327800.01.T02 | Protein DETOXIFICATION                                           |
| augustus-6-processed-gene-172.17-mRNA-1 | Japonica | NA       |               |              | OsR498G0612323800.01.T01 | Transcription factor bHLH83                                      |
| augustus-6-processed-gene-174.0-mRNA-1  | Japonica | NA       |               |              | OsR498G0713993600.01.T01 | Putative zinc finger, CCHC-type                                  |
| augustus-6-processed-gene-189.9-mRNA-1  | Japonica | NA       |               | Os01g0387333 | OsR498G0815569700.01.T02 |                                                                  |
| augustus-6-processed-gene-222.28-mRNA-1 | Japonica | NA       |               |              |                          | DDE Tnp4 domain-containing protein (Fragment)                    |
| augustus-6-processed-gene-245.23-mRNA-1 | Japonica | NA       |               |              |                          | Retrotransposon protein, putative, unclassified, expressed       |
| augustus-6-processed-gene-255.29-mRNA-1 | Japonica | NA       |               | Os12g0468900 | OsR498G0916869000.01.T01 | Cell wall protein-like                                           |
| augustus-6-processed-gene-256.35-mRNA-1 | Japonica | NA       |               | Os03g0110200 |                          | Transposon protein, putative, Mutator sub-class, expressed       |
| augustus-6-processed-gene-260.26-mRNA-1 | Japonica | NA       |               | Os06g0636300 | OsR498G0613025400.01.T02 | Ubiquitin-specific protease family C19-related protein           |
| augustus-6-processed-gene-288.73-mRNA-1 | Japonica | NA       |               | Os06g0687000 | OsR498G0613209600.01.T01 | Regulator of Vps4 activity in the MVB pathway protein            |
| augustus-6-processed-gene-291.18-mRNA-1 | Japonica | NA       | Kinase-TM     | Os06g0693200 | OsR498G0613227500.01.T01 | probable receptor-like serine/threonine-protein kinase At5g57670 |
| augustus-6-processed-gene-4.32-mRNA-1   | Japonica | NA       |               | Os06g0106100 | OsR498G0611480000.01.T01 | Pre-mRNA-splicing factor Cwf15/Cwc15                             |
| augustus-6-processed-gene-5.13-mRNA-1   | Japonica | NA       |               |              |                          |                                                                  |
| augustus-6-processed-gene-76.24-mRNA-1  | Japonica | Indica   |               | Os06g0244000 | OsR498G0611978800.01.T01 | Anthranilate O-methyltransferase 2                               |
| augustus-6-processed-gene-86.24-mRNA-1  | Japonica | NA       |               |              | OsR498G0306743300.01.T01 | Transposon protein, putative, CACTA, En/Spm sub-class            |
| augustus-6-processed-gene-93.17-mRNA-1  | Japonica | NA       | Kinase-LRR-TM | Os06g0274500 | OsR498G0612087700.01.T01 | Putative somatic embryogenesis protein kinase 1                  |
| augustus-7-processed-gene-100.22-mRNA-1 | Japonica | Japonica |               | Os07g0277400 | OsR498G1221660800.01.T01 | FBD domain-containing protein (Fragment)                         |
| augustus-7-processed-gene-103.25-mRNA-1 | Japonica | NA       |               | Os07g0281200 | OsR498G0713993200.01.T01 |                                                                  |
| augustus-7-processed-gene-104.13-mRNA-1 | Japonica | NA       | Kinase-TM     | Os07g0283050 | OsR498G0713999000.01.T01 | Putative receptor-type protein kinase LRK1                       |
| augustus-7-processed-gene-108.12-mRNA-1 | Japonica | NA       |               |              |                          | ABC transporter domain-containing protein                        |
| augustus-7-processed-gene-109.15-mRNA-1 | Japonica | Indica   |               | Os07g0290200 | OsR498G0714023700.01.T01 | AAI domain-containing protein                                    |
| augustus-7-processed-gene-109.21-mRNA-1 | Japonica | Indica   |               | Os01g0860500 | OsR498G0714025000.01.T01 | Endo-beta-N-acetylglucosaminidase                                |
| augustus-7-processed-gene-109.35-mRNA-1 | Japonica | NA       |               | Os07g0291100 | OsR498G0714026000.01.T01 | Transport protein particle (TRAPP) complex subunit               |
| augustus-7-processed-gene-113.19-mRNA-1 | Japonica | NA       |               | Os07g0297300 | OsR498G0714043200.01.T03 | Methyltransferase-like protein 17, mitochondrial                 |
| augustus-7-processed-gene-114.19-mRNA-1 | Japonica | NA       |               | Os03g0110200 |                          | Transposon protein, putative, Mutator sub-class, expressed       |
| augustus-7-processed-gene-115.10-mRNA-1 | Japonica | NA       |               |              |                          | Cell wall protein-like                                           |
| augustus-7-processed-gene-116.5-mRNA-1  | Japonica | NA       |               | Os07g0302100 | OsR498G0714058400.01.T01 | Non-specific serine/threonine protein kinase (Fragment)          |
| augustus-7-processed-gene-123.1-mRNA-1  | Japonica | NA       |               | Os07g0407900 | OsR498G0714077500.01.T01 | DUF679 domain membrane protein 7                                 |
| augustus-7-processed-gene-124.34-mRNA-1 | Japonica | NA       |               | Os07g0409400 | OsR498G0714085000.01.T05 | Transcription termination factor MTEF18, mitochondrial           |
| augustus-7-processed-gene-124.37-mRNA-1 | Japonica | NA       |               | Os07g0409500 | OsR498G0714085700.01.T01 | Skp1 domain-containing protein                                   |
| augustus-7-processed-gene-125.1-mRNA-1  | Japonica | NA       |               | Os07g0410700 | OsR498G0714091600.01.T01 | Ethylene-responsive transcription factor 15                      |
| augustus-7-processed-gene-127.1-mRNA-1  | Japonica | NA       |               | Os07g0414000 | OsR498G0714098100.01.T01 | Anthocyanin 5-aromatic acyltransferase                           |
| augustus-7-processed-gene-127.20-mRNA-1 | Japonica | NA       |               | Os07g0415200 | OsR498G0714100900.01.T01 | Putative mitochondrial ribosomal protein L23                     |
| augustus-7-processed-gene-128.21-mRNA-1 | Japonica | NA       |               | Os07g0417200 | OsR498G0714108300.01.T01 | Omega-6 fatty acid desaturase, endoplasmic reticulum isozyme 2   |
| augustus-7-processed-gene-128.31-mRNA-1 | Japonica | NA       |               | Os07g0416900 | OsR498G0714107400.01.T02 | Omega-6 fatty acid desaturase, endoplasmic reticulum isozyme 2   |
| augustus-7-processed-gene-129.18-mRNA-1 | Japonica | NA       |               | Os07g0417600 | OsR498G0714110200.01.T01 | Thaumatococcus-like protein 1 isoform B                          |
| augustus-7-processed-gene-130.12-mRNA-1 | Japonica | NA       |               | Os07g0418600 | OsR498G0714114600.01.T01 | Proline and lysine rich protein                                  |
| augustus-7-processed-gene-130.17-mRNA-1 | Japonica | Indica   |               | Os04g0131900 | OsR498G0714118700.01.T07 | Sterol 3-beta-glucosyltransferase 1                              |
| augustus-7-processed-gene-130.25-mRNA-1 | Japonica | Japonica |               | Os07g0418500 | OsR498G0714820100.01.T01 | Secologanin synthase                                             |
| augustus-7-processed-gene-130.28-mRNA-1 | Japonica | Indica   |               | Os07g0419800 | OsR498G0714121200.01.T03 | C2H2-type domain-containing protein                              |
| augustus-7-processed-gene-130.6-mRNA-1  | Japonica | Japonica |               | Os07g0418700 | OsR498G0714114600.01.T01 | Early nodulin 75 protein                                         |
| augustus-7-processed-gene-131.27-mRNA-1 | Japonica | NA       |               | Os07g0421000 | OsR498G0714126600.01.T02 | Monogalactosyldiacylglycerol synthase                            |
| augustus-7-processed-gene-131.8-mRNA-1  | Japonica | Indica   |               | Os11g0701800 | OsR498G0714121900.01.T01 | Acidic endochitinase                                             |
| augustus-7-processed-gene-132.14-mRNA-1 | Japonica | Japonica |               | Os07g0421300 | OsR498G0714125300.01.T05 | Heteroglycan glucosidase 1                                       |
| augustus-7-processed-gene-133.14-mRNA-1 | Japonica | NA       |               | Os07g0423000 | OsR498G0714131800.01.T03 | Polyubiquitin                                                    |
| augustus-7-processed-gene-133.20-mRNA-1 | Japonica | NA       |               |              | OsR498G0510760300.01.T01 |                                                                  |
| augustus-7-processed-gene-134.22-mRNA-1 | Japonica | NA       |               |              | OsR498G0714140800.01.T01 |                                                                  |
| augustus-7-processed-gene-141.26-mRNA-1 | Japonica | NA       |               |              | OsR498G0714153600.01.T01 | Tetratricopeptide repeat (TPR)-like superfamily protein          |
| augustus-7-processed-gene-142.18-mRNA-1 | Japonica | Japonica |               | Os07g0436600 | OsR498G0714158500.01.T05 | Selenium-binding protein-like                                    |
| augustus-7-processed-gene-142.19-mRNA-1 | Japonica | NA       |               | Os07g0436700 |                          |                                                                  |
| augustus-7-processed-gene-142.27-mRNA-1 | Japonica | NA       |               | Os07g0437000 | OsR498G0714159000.01.T02 | Flavin-containing monooxygenase                                  |
| augustus-7-processed-gene-142.9-mRNA-1  | Japonica | NA       |               | Os07g0435900 | OsR498G0714156900.01.T02 | Histone-lysine N-methyltransferase family member SUVH9           |
| augustus-7-processed-gene-143.0-mRNA-1  | Japonica | NA       |               | Os01g0293600 |                          | zinc finger MYM-type protein 1-like                              |
| augustus-7-processed-gene-143.5-mRNA-1  | Japonica | NA       |               | Os07g0437500 | OsR498G0714162100.01.T05 | Aromatic-L-amino-acid/L-histidine decarboxylase                  |
| augustus-7-processed-gene-144.23-mRNA-1 | Japonica | NA       |               |              | OsR498G0714169700.01.T01 | DUF295 domain-containing protein                                 |

|                                         |          |          |           |              |                          |                                                                          |
|-----------------------------------------|----------|----------|-----------|--------------|--------------------------|--------------------------------------------------------------------------|
| augustus-7-processed-gene-144.41-mRNA-1 | Japonica | NA       |           | Os07g0440100 | OsR498G0714170000.01.T03 | glycine-rich cell wall structural protein 1                              |
| augustus-7-processed-gene-146.14-mRNA-1 | Japonica | Indica   |           | Os07g0443500 | OsR498G0714178700.01.T01 | SANT domain-containing protein                                           |
| augustus-7-processed-gene-149.7-mRNA-1  | Japonica | Japonica |           | Os07g0446800 | OsR498G0509895600.01.T01 | Phosphotransferase                                                       |
| augustus-7-processed-gene-152.4-mRNA-1  | Japonica | NA       |           |              | OsR498G0713980300.01.T01 |                                                                          |
| augustus-7-processed-gene-152.6-mRNA-1  | Japonica | Japonica |           | Os07g0451300 | OsR498G0714197900.01.T01 |                                                                          |
| augustus-7-processed-gene-155.2-mRNA-1  | Japonica | NA       |           |              | OsR498G0100075100.01.T01 | Epstein-Barr virus EBNA-1-like                                           |
| augustus-7-processed-gene-155.23-mRNA-1 | Japonica | NA       |           | Os07g0456900 | OsR498G0714218600.01.T01 | NAC domain-containing protein (Fragment)                                 |
| augustus-7-processed-gene-156.20-mRNA-1 | Japonica | Indica   |           | Os07g0457400 | OsR498G0714219900.01.T01 |                                                                          |
| augustus-7-processed-gene-158.9-mRNA-1  | Japonica | Japonica |           | Os07g0460100 | OsR498G0509914200.01.T01 | Stem 28 kDa glycoprotein                                                 |
| augustus-7-processed-gene-159.35-mRNA-1 | Japonica | NA       |           | Os05g0129000 | OsR498G0714240400.01.T04 | Glutamate--cysteine ligase B, chloroplastic                              |
| augustus-7-processed-gene-165.21-mRNA-1 | Japonica | NA       |           | Os07g0251301 |                          | 60s acidic ribosomal protein domain-containing protein                   |
| augustus-7-processed-gene-165.32-mRNA-1 | Japonica | NA       |           | Os07g0470400 | OsR498G0714265800.01.T02 |                                                                          |
| augustus-7-processed-gene-169.15-mRNA-1 | Japonica | NA       |           | Os07g0475700 | OsR498G0714287500.01.T01 | Auxin-responsive protein SAUR61                                          |
| augustus-7-processed-gene-170.35-mRNA-1 | Japonica | NA       |           | Os07g0477500 | OsR498G0714295500.01.T01 | zinc finger CCCH domain-containing protein 13-like isoform X2            |
| augustus-7-processed-gene-171.13-mRNA-1 | Japonica | NA       |           | Os03g0204201 | OsR498G0408675500.01.T01 | Retrotransposon protein, putative, Ty3-gypsy sub-class                   |
| augustus-7-processed-gene-174.27-mRNA-1 | Japonica | NA       |           | Os07g0483500 | OsR498G0714312400.01.T04 | FT-interacting protein 1                                                 |
| augustus-7-processed-gene-175.13-mRNA-1 | Japonica | NA       |           | Os07g0485000 | OsR498G0714317500.01.T02 | Trehalose 6-phosphate phosphatase                                        |
| augustus-7-processed-gene-175.9-mRNA-1  | Japonica | NA       |           | Os07g0484500 | OsR498G0714315500.01.T02 | Spindle and kinetochore-associated protein 1                             |
| augustus-7-processed-gene-177.15-mRNA-1 | Japonica | Japonica |           | Os07g0487100 | OsR498G0714323900.01.T01 | Glycosyltransferase                                                      |
| augustus-7-processed-gene-191.1-mRNA-1  | Japonica | NA       |           |              | OsR498G0511427100.01.T01 | Epstein-Barr virus EBNA-1-like                                           |
| augustus-7-processed-gene-193.35-mRNA-1 | Japonica | NA       |           | Os07g0513000 |                          | ATP synthase gamma chain like                                            |
| augustus-7-processed-gene-193.51-mRNA-1 | Japonica | NA       |           | Os07g0513200 | OsR498G0714418200.01.T02 | Pentatricopeptide repeat-containing protein mitochondrial                |
| augustus-7-processed-gene-201.21-mRNA-1 | Japonica | NA       |           |              | OsR498G0714474500.01.T01 |                                                                          |
| augustus-7-processed-gene-204.30-mRNA-1 | Japonica | NA       |           | Os07g0532800 |                          | Peptidase A1 domain-containing protein (Fragment)                        |
| augustus-7-processed-gene-204.8-mRNA-1  | Japonica | NA       |           |              |                          | Putative ankyrin repeat-containing domain, PGD domain-containing protein |
| augustus-7-processed-gene-209.52-mRNA-1 | Japonica | NA       |           |              |                          | Transposon protein, putative, Mutator sub-class, expressed               |
| augustus-7-processed-gene-21.26-mRNA-1  | Japonica | Japonica |           | Os07g0148600 | OsR498G1221267000.01.T01 | Sulfotransferase                                                         |
| augustus-7-processed-gene-21.29-mRNA-1  | Japonica | NA       |           |              | OsR498G0511146000.01.T01 |                                                                          |
| augustus-7-processed-gene-21.6-mRNA-1   | Japonica | NA       | Kinase-TM | Os07g0147600 | OsR498G0713511000.01.T02 | Mitogen-activated protein kinase kinase kinase                           |
| augustus-7-processed-gene-210.26-mRNA-1 | Japonica | Indica   |           | Os07g0542400 | OsR498G0714520000.01.T02 | Cysteine-rich receptor-like protein kinase 15                            |
| augustus-7-processed-gene-211.28-mRNA-1 | Japonica | Japonica |           | Os07g0543600 | OsR498G0714523900.01.T01 | Strictosidine synthase 1                                                 |
| augustus-7-processed-gene-212.0-mRNA-1  | Japonica | NA       |           | Os07g0545800 | OsR498G0714527300.01.T01 | Chitin-inducible gibberellin-responsive protein 1                        |
| augustus-7-processed-gene-212.12-mRNA-1 | Japonica | Indica   |           | Os07g0546400 | OsR498G0714529100.01.T04 | NPH3 domain-containing protein (Fragment)                                |
| augustus-7-processed-gene-212.25-mRNA-1 | Japonica | NA       |           | Os11g0433800 |                          | Ribosomal protein-like                                                   |
| augustus-7-processed-gene-213.14-mRNA-1 | Japonica | Indica   |           | Os07g0548500 | OsR498G0714534100.01.T01 |                                                                          |
| augustus-7-processed-gene-213.24-mRNA-1 | Japonica | Japonica |           | Os07g0548000 | OsR498G0714534100.01.T01 | FBD domain-containing protein                                            |
| augustus-7-processed-gene-214.34-mRNA-1 | Japonica | NA       |           |              | OsR498G0714536900.01.T01 | Vacuolar ATP synthase subunit h                                          |
| augustus-7-processed-gene-214.36-mRNA-1 | Japonica | NA       |           | Os07g0549900 | OsR498G0714537700.01.T01 | Multifunctional fusion protein                                           |
| augustus-7-processed-gene-214.43-mRNA-1 | Japonica | NA       |           | Os07g0549100 |                          | Transmembrane protein, putative                                          |
| augustus-7-processed-gene-214.51-mRNA-1 | Japonica | NA       |           |              | OsR498G0714537900.01.T01 |                                                                          |
| augustus-7-processed-gene-216.21-mRNA-1 | Japonica | NA       |           |              | OsR498G0714551300.01.T01 | RNA helicase                                                             |
| augustus-7-processed-gene-216.24-mRNA-1 | Japonica | NA       |           |              | OsR498G0714552500.01.T01 | F-box domain-containing protein                                          |
| augustus-7-processed-gene-216.33-mRNA-1 | Japonica | NA       | Kinase-TM | Os07g0553633 | OsR498G0714550000.01.T01 | Non-specific serine/threonine protein kinase (Fragment)                  |
| augustus-7-processed-gene-219.36-mRNA-1 | Japonica | Indica   |           | Os07g0559100 | OsR498G0714569500.01.T01 |                                                                          |
| augustus-7-processed-gene-220.17-mRNA-1 | Japonica | NA       |           | Os07g0562400 | OsR498G0714577900.01.T01 | Organic cation/carnitine transporter 2                                   |
| augustus-7-processed-gene-220.6-mRNA-1  | Japonica | NA       |           |              | OsR498G0714573400.01.T01 | WAS/WASL-interacting protein family member 3-like                        |
| augustus-7-processed-gene-222.3-mRNA-1  | Japonica | NA       |           |              |                          | Glycine-rich rna-binding protein                                         |
| augustus-7-processed-gene-222.32-mRNA-1 | Japonica | Indica   |           | Os07g0564200 | OsR498G0714585000.01.T01 | Tyrosine-protein kinase receptor UFO like                                |
| augustus-7-processed-gene-223.11-mRNA-1 | Japonica | NA       |           |              | OsR498G0714591300.01.T01 | F-box domain-containing protein                                          |
| augustus-7-processed-gene-223.21-mRNA-1 | Japonica | NA       |           | Os07g0565800 | OsR498G0714589800.01.T01 |                                                                          |
| augustus-7-processed-gene-223.6-mRNA-1  | Japonica | NA       |           | Os04g0613400 | OsR498G0714587700.01.T03 | Cell differentiation protein rcd1                                        |
| augustus-7-processed-gene-224.10-mRNA-1 | Japonica | NA       |           | Os07g0567000 | OsR498G0714593500.01.T01 | Exostosin domain-containing protein (Fragment)                           |
| augustus-7-processed-gene-224.15-mRNA-1 | Japonica | NA       |           |              | OsR498G0714594900.01.T02 | Scarecrow-like protein 23                                                |
| augustus-7-processed-gene-224.26-mRNA-1 | Japonica | NA       |           | Os07g0566500 | OsR498G0714592800.01.T01 | NAC transcription factor                                                 |
| augustus-7-processed-gene-225.12-mRNA-1 | Japonica | NA       |           | Os07g0568450 |                          |                                                                          |
| augustus-7-processed-gene-225.2-mRNA-1  | Japonica | NA       |           | Os07g0568300 | OsR498G0714596900.01.T03 | Zinc finger CCCH domain-containing protein 50                            |
| augustus-7-processed-gene-225.23-mRNA-1 | Japonica | NA       |           | Os07g0568800 |                          |                                                                          |
| augustus-7-processed-gene-226.0-mRNA-1  | Japonica | NA       |           | Os07g0569500 | OsR498G0714601500.01.T01 | Protein-lysine N-methyltransferase rrg1 (Fragment)                       |
| augustus-7-processed-gene-226.3-mRNA-1  | Japonica | Japonica | Kinase-TM | Os07g0569800 | OsR498G0714602900.01.T01 | L-type lectin-domain containing receptor kinase IX.1                     |
| augustus-7-processed-gene-229.3-mRNA-1  | Japonica | NA       |           | Os07g0573200 | OsR498G0714613300.01.T01 | Adenylyl-sulfate kinase                                                  |
| augustus-7-processed-gene-23.2-mRNA-1   | Japonica | Indica   |           | Os04g0393500 | OsR498G0713525100.01.T01 | Glutaredoxin                                                             |

|                                         |          |          |           |              |                          |                                                                          |
|-----------------------------------------|----------|----------|-----------|--------------|--------------------------|--------------------------------------------------------------------------|
| augustus-7-processed-gene-230.20-mRNA-1 | Japonica | NA       |           | Os07g0575401 |                          |                                                                          |
| augustus-7-processed-gene-230.22-mRNA-1 | Japonica | NA       |           |              | OsR498G0714619600.01.T01 | Ethylene-responsive transcription factor                                 |
| augustus-7-processed-gene-230.27-mRNA-1 | Japonica | NA       | Kinase-TM | Os07g0575600 | OsR498G0714620600.01.T01 | Putative receptor-type protein kinase LRK1                               |
| augustus-7-processed-gene-230.37-mRNA-1 | Japonica | NA       |           | Os07g0576100 | OsR498G0714622300.01.T01 | Indole-3-acetic acid amido synthetase                                    |
| augustus-7-processed-gene-230.47-mRNA-1 | Japonica | NA       | Kinase-TM | Os07g0575700 | OsR498G0714621000.01.T01 | Lectin receptor-type kinase                                              |
| augustus-7-processed-gene-230.48-mRNA-1 | Japonica | Indica   | Kinase-TM | Os07g0575600 | OsR498G0714621200.01.T01 | Lectin receptor-type kinase                                              |
| augustus-7-processed-gene-231.28-mRNA-1 | Japonica | NA       |           | Os07g0578300 |                          | Subtilisin-like protease                                                 |
| augustus-7-processed-gene-232.34-mRNA-1 | Japonica | NA       |           | Os07g0578700 |                          |                                                                          |
| augustus-7-processed-gene-233.32-mRNA-1 | Japonica | NA       |           | Os07g0583000 | OsR498G0714642400.01.T01 | Stress-associated endoplasmic reticulum protein 2                        |
| augustus-7-processed-gene-234.40-mRNA-1 | Japonica | NA       |           | Os07g0583600 | OsR498G0714645900.01.T01 | Chitin-inducible gibberellin-responsive protein 2                        |
| augustus-7-processed-gene-235.37-mRNA-1 | Japonica | NA       |           | Os07g0585100 | OsR498G0714651700.01.T02 | Proteinase inhibitor I25, cystatin                                       |
| augustus-7-processed-gene-235.43-mRNA-1 | Japonica | NA       |           | Os07g0585700 | OsR498G0714655100.01.T01 |                                                                          |
| augustus-7-processed-gene-235.56-mRNA-1 | Japonica | Indica   |           | Os03g0431200 | OsR498G0714654200.01.T02 | Amino-acid N-acetyltransferase                                           |
| augustus-7-processed-gene-236.17-mRNA-1 | Japonica | NA       |           | Os07g0587000 |                          | F-box domain-containing protein                                          |
| augustus-7-processed-gene-236.18-mRNA-1 | Japonica | Indica   |           | Os07g0587500 | OsR498G0714665300.01.T01 | U-box domain-containing protein 4                                        |
| augustus-7-processed-gene-236.25-mRNA-1 | Japonica | NA       |           | Os07g0587300 |                          |                                                                          |
| augustus-7-processed-gene-236.26-mRNA-1 | Japonica | NA       |           | Os07g0587400 | OsR498G0714664800.01.T03 | Eukaryotic peptide chain release factor subunit 1                        |
| augustus-7-processed-gene-236.9-mRNA-1  | Japonica | NA       |           | Os07g0586600 | OsR498G0714658200.01.T01 | GIY-YIG domain-containing protein                                        |
| augustus-7-processed-gene-237.10-mRNA-1 | Japonica | Japonica |           | Os07g0588600 | OsR498G0714669700.01.T01 | Zinc finger protein 1                                                    |
| augustus-7-processed-gene-237.12-mRNA-1 | Japonica | Japonica |           | Os07g0588700 | OsR498G0714669700.01.T01 | C2H2-type zinc finger transcription factor                               |
| augustus-7-processed-gene-237.13-mRNA-1 | Japonica | NA       |           | Os07g0588800 | OsR498G0714670300.01.T04 | Queuosine salvage protein (Fragment)                                     |
| augustus-7-processed-gene-237.17-mRNA-1 | Japonica | NA       |           | Os07g0589200 | OsR498G0714672500.01.T01 | Scarecrow transcription factor family protein                            |
| augustus-7-processed-gene-238.25-mRNA-1 | Japonica | NA       |           | Os07g0589600 | OsR498G0714673400.01.T01 | Zinc finger CCCH domain-containing protein 18                            |
| augustus-7-processed-gene-238.31-mRNA-1 | Japonica | NA       |           | Os07g0590100 | OsR498G0714674100.01.T01 | Zinc finger protein 1                                                    |
| augustus-7-processed-gene-238.32-mRNA-1 | Japonica | Japonica |           | Os07g0590600 | OsR498G0714675900.01.T01 | Pentatricopeptide repeat-containing protein (Fragment)                   |
| augustus-7-processed-gene-238.48-mRNA-1 | Japonica | NA       |           |              | OsR498G0714676400.01.T01 | Transcriptional regulatory protein algP                                  |
| augustus-7-processed-gene-239.59-mRNA-1 | Japonica | NA       |           |              | OsR498G0714685600.01.T01 | RING-type E3 ubiquitin transferase                                       |
| augustus-7-processed-gene-239.62-mRNA-1 | Japonica | NA       |           |              |                          | tRNA/rRNA methyltransferase (SpoU) family protein                        |
| augustus-7-processed-gene-240.2-mRNA-1  | Japonica | NA       |           |              | OsR498G0714690900.01.T01 | Son of sevenless                                                         |
| augustus-7-processed-gene-243.15-mRNA-1 | Japonica | NA       |           | Os07g0601600 | OsR498G0714710500.01.T01 | 3-oxo-Delta(45)-steroid 5-beta-reductase                                 |
| augustus-7-processed-gene-243.4-mRNA-1  | Japonica | NA       |           |              | OsR498G0100073600.01.T01 | RNA binding protein                                                      |
| augustus-7-processed-gene-245.12-mRNA-1 | Japonica | NA       |           | Os07g0604700 | OsR498G0714724300.01.T01 | NADH-ubiquinone reductase complex 1 MLRQ subunit                         |
| augustus-7-processed-gene-245.24-mRNA-1 | Japonica | NA       |           | Os07g0604500 | OsR498G0714723800.01.T02 | Mitochondrial inner membrane translocase complex, subunit Tim            |
| augustus-7-processed-gene-245.3-mRNA-1  | Japonica | NA       |           | Os07g0603900 | OsR498G0714721300.01.T03 | Pentatricopeptide repeat                                                 |
| augustus-7-processed-gene-246.18-mRNA-1 | Japonica | NA       |           |              | OsR498G0511427100.01.T01 | Epstein-Barr virus EBNA-1-like                                           |
| augustus-7-processed-gene-246.22-mRNA-1 | Japonica | NA       |           | Os07g0605800 | OsR498G0714728400.01.T01 | Sulfotransferase                                                         |
| augustus-7-processed-gene-246.5-mRNA-1  | Japonica | NA       |           | Os07g0605200 | OsR498G0714725500.01.T04 | MADS-box transcription factor CDM41                                      |
| augustus-7-processed-gene-246.7-mRNA-1  | Japonica | Indica   |           | Os07g0605900 | OsR498G0714726500.01.T01 | Protein EGG APPARATUS-1                                                  |
| augustus-7-processed-gene-247.10-mRNA-1 | Japonica | NA       |           | Os07g0606600 | OsR498G0714730000.01.T02 | Nuclear transcription factor Y subunit B                                 |
| augustus-7-processed-gene-247.18-mRNA-1 | Japonica | NA       |           |              | OsR498G0714733100.01.T01 | BAH domain-containing protein                                            |
| augustus-7-processed-gene-247.2-mRNA-1  | Japonica | NA       |           | Os07g0606800 | OsR498G0714731100.01.T01 | Gibberellin receptor GID1L2                                              |
| augustus-7-processed-gene-247.23-mRNA-1 | Japonica | NA       |           | Os07g0608100 | OsR498G0714734900.01.T01 | Putative 6,7-dimethyl-8-ribityllumazine synthase-like                    |
| augustus-7-processed-gene-247.33-mRNA-1 | Japonica | NA       |           | Os07g0607200 | OsR498G0714733000.01.T01 |                                                                          |
| augustus-7-processed-gene-247.6-mRNA-1  | Japonica | Indica   |           | Os10g0190100 | OsR498G0714729200.01.T01 | Sulfotransferase                                                         |
| augustus-7-processed-gene-248.17-mRNA-1 | Japonica | Japonica |           | Os07g0609000 | OsR498G0714737500.01.T05 | Stress-response A/B barrel domain-containing protein UP3                 |
| augustus-7-processed-gene-249.33-mRNA-1 | Japonica | NA       |           | Os07g0611500 | OsR498G0714740700.01.T01 | CHP-rich zinc finger protein-like                                        |
| augustus-7-processed-gene-250.37-mRNA-1 | Japonica | Japonica |           | Os07g0611700 | OsR498G0714741500.01.T02 |                                                                          |
| augustus-7-processed-gene-252.0-mRNA-1  | Japonica | Indica   |           | Os07g0616500 | OsR498G0714756300.01.T02 | (S)-2-hydroxy-acid oxidase                                               |
| augustus-7-processed-gene-252.16-mRNA-1 | Japonica | NA       |           |              | OsR498G0510294600.01.T01 | Zinc knuckle containing protein-like                                     |
| augustus-7-processed-gene-252.20-mRNA-1 | Japonica | NA       |           |              | OsR498G0714763000.01.T01 | RING-H2 finger protein ATL3                                              |
| augustus-7-processed-gene-252.7-mRNA-1  | Japonica | NA       |           | Os07g0617100 | OsR498G0714759700.01.T01 |                                                                          |
| augustus-7-processed-gene-253.19-mRNA-1 | Japonica | NA       |           | Os07g0619500 | OsR498G0714766900.01.T01 | Hormone receptor 4 like                                                  |
| augustus-7-processed-gene-254.35-mRNA-1 | Japonica | NA       |           |              | OsR498G0714769900.01.T01 | Putative caltractin                                                      |
| augustus-7-processed-gene-254.36-mRNA-1 | Japonica | NA       |           | Os07g0620200 | OsR498G0714770300.01.T01 | AT hook-containing MAR binding 1-like protein (Fragment)                 |
| augustus-7-processed-gene-254.45-mRNA-1 | Japonica | NA       |           | Os07g0620600 |                          | AP-3 complex subunit mu like                                             |
| augustus-7-processed-gene-254.46-mRNA-1 | Japonica | Japonica |           | Os07g0621100 | OsR498G0714772900.01.T01 | Pentatricopeptide repeat-containing protein                              |
| augustus-7-processed-gene-254.61-mRNA-1 | Japonica | NA       |           | Os07g0621800 | OsR498G0714774200.01.T01 | Alcohol dehydrogenase superfamily, zinc-type                             |
| augustus-7-processed-gene-255.1-mRNA-1  | Japonica | NA       |           | Os07g0622100 | OsR498G0714775300.01.T01 | 40S ribosomal protein S6                                                 |
| augustus-7-processed-gene-255.14-mRNA-1 | Japonica | NA       |           | Os07g0622700 | OsR498G0714778400.01.T01 | 2-hydroxy-6-oxononadienedioate/2-hydroxy-6-oxononatrienedioate hydrolase |
| augustus-7-processed-gene-255.15-mRNA-1 | Japonica | NA       |           | Os07g0622900 | OsR498G0714778600.01.T01 | Peptidase                                                                |
| augustus-7-processed-gene-256.33-mRNA-1 | Japonica | Indica   |           | Os07g0625500 | OsR498G0714786700.01.T01 | AIF-MLS domain-containing protein                                        |

|                                         |          |          |  |              |                          |                                                              |
|-----------------------------------------|----------|----------|--|--------------|--------------------------|--------------------------------------------------------------|
| augustus-7-processed-gene-256.48-mRNA-1 | Japonica | NA       |  |              | OsR498G0714782600.01.T01 | VQ motif family protein, expressed                           |
| augustus-7-processed-gene-257.19-mRNA-1 | Japonica | NA       |  |              | OsR498G0714792900.01.T01 | 4-alpha-glucanotransferase                                   |
| augustus-7-processed-gene-257.36-mRNA-1 | Japonica | Indica   |  | Os07g0626800 | OsR498G0714792000.01.T01 | 15-cis-phytoene desaturase, chloroplastic/chromoplastic      |
| augustus-7-processed-gene-259.23-mRNA-1 | Japonica | NA       |  | Os07g0631700 | OsR498G0714808300.01.T02 | Putative calcium-binding protein CML45                       |
| augustus-7-processed-gene-259.31-mRNA-1 | Japonica | NA       |  | Os07g0630800 | OsR498G0714804800.01.T02 | Malate dehydrogenase                                         |
| augustus-7-processed-gene-259.36-mRNA-1 | Japonica | NA       |  | Os02g0212975 | OsR498G0305421900.01.T01 |                                                              |
| augustus-7-processed-gene-260.3-mRNA-1  | Japonica | NA       |  | Os07g0632600 | OsR498G0714810500.01.T03 | J domain-containing protein                                  |
| augustus-7-processed-gene-260.35-mRNA-1 | Japonica | NA       |  | Os07g0633600 | OsR498G0714814400.01.T01 | O-fucosyltransferase family protein                          |
| augustus-7-processed-gene-261.41-mRNA-1 | Japonica | NA       |  | Os07g0635300 | OsR498G0714820500.01.T01 | Secologanin synthase                                         |
| augustus-7-processed-gene-261.57-mRNA-1 | Japonica | NA       |  | Os07g0636000 | OsR498G0714822200.01.T01 | PUA domain-containing protein (Fragment)                     |
| augustus-7-processed-gene-262.45-mRNA-1 | Japonica | NA       |  | Os07g0636400 | OsR498G0714824300.01.T01 | 50S ribosomal protein like                                   |
| augustus-7-processed-gene-263.0-mRNA-1  | Japonica | Japonica |  | Os07g0637700 | OsR498G0714825200.01.T01 | Zinc finger Ran-binding domain-containing protein 3          |
| augustus-7-processed-gene-263.10-mRNA-1 | Japonica | NA       |  | Os07g0638300 | OsR498G0714830900.01.T01 | Peroxioredoxin                                               |
| augustus-7-processed-gene-263.33-mRNA-1 | Japonica | Japonica |  | Os07g0638600 | OsR498G0714833300.01.T01 | Peroxidase                                                   |
| augustus-7-processed-gene-263.8-mRNA-1  | Japonica | NA       |  | Os07g0638100 | OsR498G0714830500.01.T01 | TolB protein-related                                         |
| augustus-7-processed-gene-264.74-mRNA-1 | Japonica | NA       |  | Os07g0639400 | OsR498G0714834500.01.T01 | Peroxidase                                                   |
| augustus-7-processed-gene-264.97-mRNA-1 | Japonica | NA       |  | Os07g0641700 | OsR498G0714840300.01.T01 | Chaperonin, mitochondrial                                    |
| augustus-7-processed-gene-265.14-mRNA-1 | Japonica | Japonica |  | Os07g0643000 | OsR498G0714846000.01.T01 | probable carboxylesterase 18                                 |
| augustus-7-processed-gene-265.15-mRNA-1 | Japonica | Japonica |  | Os07g0643800 | OsR498G0714825200.01.T01 | Zinc finger Ran-binding domain-containing protein 3          |
| augustus-7-processed-gene-265.23-mRNA-1 | Japonica | NA       |  | Os07g0643100 | OsR498G0714846000.01.T01 | Putative carboxylesterase 18                                 |
| augustus-7-processed-gene-265.27-mRNA-1 | Japonica | NA       |  | Os07g0643400 | OsR498G0714846800.01.T01 | Putative carboxylesterase 18                                 |
| augustus-7-processed-gene-265.6-mRNA-1  | Japonica | NA       |  |              |                          | ATP-dependent DNA helicase                                   |
| augustus-7-processed-gene-266.21-mRNA-1 | Japonica | NA       |  | Os01g0304500 | OsR498G0100876000.01.T01 | Transposon protein, putative, Mutator sub-class              |
| augustus-7-processed-gene-267.21-mRNA-1 | Japonica | Indica   |  | Os07g0646300 | OsR498G0714855400.01.T01 |                                                              |
| augustus-7-processed-gene-267.5-mRNA-1  | Japonica | Indica   |  | Os07g0645300 | OsR498G0714853500.01.T01 | DUF679 domain membrane protein 2                             |
| augustus-7-processed-gene-268.75-mRNA-1 | Japonica | NA       |  | Os07g0647400 | OsR498G0714863900.01.T01 | BSD domain-containing protein 1                              |
| augustus-7-processed-gene-269.14-mRNA-1 | Japonica | Japonica |  | Os07g0649300 | OsR498G0714870700.01.T01 |                                                              |
| augustus-7-processed-gene-269.29-mRNA-1 | Japonica | NA       |  | Os05g0412300 |                          |                                                              |
| augustus-7-processed-gene-274.58-mRNA-1 | Japonica | NA       |  | Os07g0656400 | OsR498G0714881300.01.T02 | Putative glycosyltransferase STELLO1                         |
| augustus-7-processed-gene-274.70-mRNA-1 | Japonica | NA       |  |              | OsR498G0714881200.01.T01 | Glycosyl hydrolase superfamily protein                       |
| augustus-7-processed-gene-275.51-mRNA-1 | Japonica | NA       |  | Os07g0657400 | OsR498G0714885700.01.T01 | EGF domain-specific O-linked N-acetylglucosamine transferase |
| augustus-7-processed-gene-275.60-mRNA-1 | Japonica | NA       |  | Os07g0658300 | OsR498G0714887700.01.T04 | Pleckstrin homology (PH) domain-containing protein-like      |
| augustus-7-processed-gene-275.66-mRNA-1 | Japonica | NA       |  |              | OsR498G0714887200.01.T03 | Signal recognition particle SEC65 subunit                    |
| augustus-7-processed-gene-275.71-mRNA-1 | Japonica | NA       |  | Os07g0658700 | OsR498G0714888800.01.T01 | Phosphatidylinositol 4-phosphate 5-kinase                    |
| augustus-7-processed-gene-277.8-mRNA-1  | Japonica | NA       |  | Os07g0661400 | OsR498G0714897400.01.T03 | Protein EARLY RESPONSIVE TO DEHYDRATION 15                   |
| augustus-7-processed-gene-28.12-mRNA-1  | Japonica | NA       |  | Os07g0160600 | OsR498G0713564300.01.T01 | Fasciclin-like arabinogalactan protein 16                    |
| augustus-7-processed-gene-280.75-mRNA-1 | Japonica | NA       |  |              | OsR498G0714920800.01.T01 | F-box domain-containing protein                              |
| augustus-7-processed-gene-281.53-mRNA-1 | Japonica | NA       |  |              | OsR498G0714929500.01.T02 | Cysteine-tryptophan domain-containing zinc finger protein 7  |
| augustus-7-processed-gene-281.55-mRNA-1 | Japonica | NA       |  | Os07g0670200 | OsR498G0714930300.01.T01 | C2 domain-containing protein (Fragment)                      |
| augustus-7-processed-gene-281.56-mRNA-1 | Japonica | NA       |  | Os07g0670300 | OsR498G0714930700.01.T01 | C2 domain-containing protein (Fragment)                      |
| augustus-7-processed-gene-281.71-mRNA-1 | Japonica | NA       |  | Os07g0670000 |                          | Pentatricopeptide repeat-containing protein mitochondrial    |
| augustus-7-processed-gene-282.50-mRNA-1 | Japonica | NA       |  | Os07g0671000 | OsR498G0714931700.01.T03 | Flowering-promoting factor 1-like protein 5                  |
| augustus-7-processed-gene-282.56-mRNA-1 | Japonica | Japonica |  | Os07g0671200 | OsR498G0714932400.01.T01 | Pentatricopeptide repeat-containing protein                  |
| augustus-7-processed-gene-283.29-mRNA-1 | Japonica | NA       |  | Os07g0673700 | OsR498G0714939900.01.T02 | F-box/kelch-repeat protein SKIP6                             |
| augustus-7-processed-gene-283.41-mRNA-1 | Japonica | Japonica |  | Os07g0673801 | OsR498G0305924500.01.T01 |                                                              |
| augustus-7-processed-gene-283.58-mRNA-1 | Japonica | NA       |  | Os07g0674700 | OsR498G0714944100.01.T01 | Cytoplasmic ribosomal protein L18                            |
| augustus-7-processed-gene-283.66-mRNA-1 | Japonica | NA       |  | Os07g0674300 | OsR498G0714942400.01.T01 | Pentatricopeptide repeat                                     |
| augustus-7-processed-gene-284.1-mRNA-1  | Japonica | Japonica |  | Os07g0675250 | OsR498G0714945700.01.T01 | IBB domain-containing protein                                |
| augustus-7-processed-gene-284.21-mRNA-1 | Japonica | NA       |  | Os07g0676700 |                          | Endonuclease/Exonuclease/phosphatase family protein          |
| augustus-7-processed-gene-286.0-mRNA-1  | Japonica | NA       |  | Os07g0679200 | OsR498G0714958700.01.T01 | Transcription repressor                                      |
| augustus-7-processed-gene-287.10-mRNA-1 | Japonica | NA       |  | Os07g0681400 | OsR498G0714966300.01.T03 | Probable calcium-binding protein CML32                       |
| augustus-7-processed-gene-288.49-mRNA-1 | Japonica | NA       |  |              | OsR498G0204046800.01.T01 | Circumsporozoite protein-like                                |
| augustus-7-processed-gene-288.63-mRNA-1 | Japonica | NA       |  |              | OsR498G0511427100.01.T01 | Epstein-Barr virus EBNA-1-like                               |
| augustus-7-processed-gene-289.31-mRNA-1 | Japonica | NA       |  | Os07g0685900 | OsR498G0714985300.01.T01 | Subtilisin-like protease                                     |
| augustus-7-processed-gene-289.41-mRNA-1 | Japonica | NA       |  | Os07g0685700 | OsR498G0714984400.01.T02 | Ethylene signal transcription factor                         |
| augustus-7-processed-gene-29.24-mRNA-1  | Japonica | Indica   |  | Os07g0161900 | OsR498G0713566700.01.T01 | VQ motif-containing protein 8, chloroplastic                 |
| augustus-7-processed-gene-29.25-mRNA-1  | Japonica | Japonica |  | Os07g0161900 | OsR498G0713566700.01.T01 | VQ domain-containing protein                                 |
| augustus-7-processed-gene-29.44-mRNA-1  | Japonica | NA       |  | Os07g0162600 | OsR498G0713570600.01.T01 | Putative carboxylesterase 15                                 |
| augustus-7-processed-gene-29.45-mRNA-1  | Japonica | NA       |  | Os07g0162700 | OsR498G0713571400.01.T01 | probable carboxylesterase 15                                 |
| augustus-7-processed-gene-290.2-mRNA-1  | Japonica | NA       |  | Os07g0686600 | OsR498G0714990300.01.T01 | VQ domain-containing protein                                 |
| augustus-7-processed-gene-290.20-mRNA-1 | Japonica | NA       |  | Os07g0688000 | OsR498G0714994900.01.T04 | Manganese-dependent ADP-ribose/CDP-alcohol diphosphatase     |



|                                         |          |          |            |              |                          |                                                                      |
|-----------------------------------------|----------|----------|------------|--------------|--------------------------|----------------------------------------------------------------------|
| augustus-7-processed-gene-291.43-mRNA-1 | Japonica | Indica   |            | Os03g0311600 | OsR498G0714996600.01.T01 | Transcription factor bHLH149 like                                    |
| augustus-7-processed-gene-292.16-mRNA-1 | Japonica | NA       |            |              |                          | D-alanine--D-alanine ligase family                                   |
| augustus-7-processed-gene-292.9-mRNA-1  | Japonica | NA       |            | Os07g0690900 | OsR498G0715005400.01.T01 | COBRA-like protein 7                                                 |
| augustus-7-processed-gene-293.46-mRNA-1 | Japonica | NA       |            | Os07g0692401 | OsR498G0715011300.01.T01 | Putative methyltransferases-like                                     |
| augustus-7-processed-gene-293.48-mRNA-1 | Japonica | NA       |            | Os07g0692900 | OsR498G0715011900.01.T01 | E1 ubiquitin-activating enzyme                                       |
| augustus-7-processed-gene-294.43-mRNA-1 | Japonica | Indica   |            | Os07g0694500 | OsR498G0715018100.01.T02 | PWWP domain-containing protein (Fragment)                            |
| augustus-7-processed-gene-294.52-mRNA-1 | Japonica | NA       |            | Os07g0694600 | OsR498G0715018400.01.T01 | Arogenate dehydratase                                                |
| augustus-7-processed-gene-294.64-mRNA-1 | Japonica | NA       | Kinase     | Os07g0695300 | OsR498G0715020300.01.T01 | Putative serine/threonine-protein kinase PBL7                        |
| augustus-7-processed-gene-30.1-mRNA-1   | Japonica | NA       |            |              |                          | Ubiquitinyl hydrolase 1                                              |
| augustus-7-processed-gene-30.9-mRNA-1   | Japonica | NA       |            | Os07g0164800 | OsR498G0713577500.01.T01 | PIN2/TERF1-interacting telomerase inhibitor 1                        |
| augustus-7-processed-gene-31.25-mRNA-1  | Japonica | Indica   |            | Os12g0468900 | OsR498G0713579700.01.T01 | Cell wall protein-like                                               |
| augustus-7-processed-gene-31.28-mRNA-1  | Japonica | NA       |            | Os07g0165100 | OsR498G0713578600.01.T01 | FT-interacting protein 1-like protein                                |
| augustus-7-processed-gene-36.18-mRNA-1  | Japonica | NA       |            |              | OsR498G0713622400.01.T01 |                                                                      |
| augustus-7-processed-gene-37.14-mRNA-1  | Japonica | Indica   |            | Os07g0180300 | OsR498G0713629900.01.T01 | DUF4220 domain-containing protein (Fragment)                         |
| augustus-7-processed-gene-37.4-mRNA-1   | Japonica | NA       |            | Os07g0179000 | OsR498G0713626300.01.T05 | Pentatricopeptide repeat-containing protein, putative                |
| augustus-7-processed-gene-41.21-mRNA-1  | Japonica | NA       |            | Os07g0185300 | OsR498G0713645400.01.T01 |                                                                      |
| augustus-7-processed-gene-41.40-mRNA-1  | Japonica | Japonica | Kinase-TM  | Os07g0186200 | OsR498G0713651200.01.T01 | Non-specific serine/threonine protein kinase (Fragment)              |
| augustus-7-processed-gene-42.1-mRNA-1   | Japonica | NA       | LRR-NBS-TM | Os07g0186500 | OsR498G0713652100.01.T01 | Disease resistance protein RPM1                                      |
| augustus-7-processed-gene-43.0-mRNA-1   | Japonica | NA       |            | Os12g0484600 | OsR498G0307220700.01.T01 | Nodulin-like domain-containing protein (Fragment)                    |
| augustus-7-processed-gene-43.29-mRNA-1  | Japonica | Japonica |            | Os07g0189400 | OsR498G0306754100.01.T02 | F-box domain-containing protein (Fragment)                           |
| augustus-7-processed-gene-44.14-mRNA-1  | Japonica | NA       |            |              | OsR498G0713663800.01.T01 |                                                                      |
| augustus-7-processed-gene-47.19-mRNA-1  | Japonica | NA       |            | Os07g0195300 | OsR498G0713687000.01.T01 | F-box domain-containing protein                                      |
| augustus-7-processed-gene-48.12-mRNA-1  | Japonica | NA       |            | Os07g0196300 | OsR498G0713690500.01.T01 | Retrovirus-related Pol polyprotein LINE-1                            |
| augustus-7-processed-gene-48.26-mRNA-1  | Japonica | Indica   |            | Os07g0242400 | OsR498G0713692900.01.T02 | F-box domain-containing protein (Fragment)                           |
| augustus-7-processed-gene-48.37-mRNA-1  | Japonica | Japonica |            | Os07g0196700 | OsR498G0713691600.01.T01 | NAC domain-containing protein                                        |
| augustus-7-processed-gene-5.27-mRNA-1   | Japonica | Indica   |            | Os07g0117000 | OsR498G0713412200.01.T02 | Fusarium resistance protein I2C-5-like                               |
| augustus-7-processed-gene-50.35-mRNA-1  | Japonica | NA       |            | Os07g0201100 | OsR498G0713703300.01.T01 | Coatomer subunit gamma                                               |
| augustus-7-processed-gene-51.1-mRNA-1   | Japonica | Indica   |            | Os07g0201500 | OsR498G0713705500.01.T01 | Glycosyltransferase                                                  |
| augustus-7-processed-gene-51.3-mRNA-1   | Japonica | NA       |            | Os07g0202000 | OsR498G0713706700.01.T01 | Glycosyltransferase                                                  |
| augustus-7-processed-gene-52.62-mRNA-1  | Japonica | NA       |            | Os07g0204500 | OsR498G0713712600.01.T03 | 5'-nucleotidase                                                      |
| augustus-7-processed-gene-6.22-mRNA-1   | Japonica | NA       |            |              |                          | Fusarium resistance protein I2C-5-like                               |
| augustus-7-processed-gene-6.32-mRNA-1   | Japonica | Japonica |            | Os07g0118200 | OsR498G0713415100.01.T01 | NB-ARC domain-containing protein (Fragment)                          |
| augustus-7-processed-gene-6.33-mRNA-1   | Japonica | Japonica |            | Os07g0118250 | OsR498G0713423300.01.T01 | NB-ARC domain-containing protein (Fragment)                          |
| augustus-7-processed-gene-60.2-mRNA-1   | Japonica | NA       |            |              | OsR498G0511427100.01.T01 | Epstein-Barr virus EBNA-1-like                                       |
| augustus-7-processed-gene-60.3-mRNA-1   | Japonica | NA       |            |              | OsR498G0511427100.01.T01 | Epstein-Barr virus EBNA-1-like                                       |
| augustus-7-processed-gene-61.0-mRNA-1   | Japonica | NA       |            | Os07g0217600 | OsR498G0713782100.01.T01 | Ent-cassadiene C2-hydroxylase                                        |
| augustus-7-processed-gene-64.39-mRNA-1  | Japonica | NA       |            | Os07g0223700 | OsR498G0713794900.01.T02 | RING-type E3 ubiquitin transferase                                   |
| augustus-7-processed-gene-64.42-mRNA-1  | Japonica | NA       |            | Os07g0224000 | OsR498G0713795700.01.T01 | TRASH domain-containing protein                                      |
| augustus-7-processed-gene-64.51-mRNA-1  | Japonica | NA       |            | Os07g0223832 |                          | RING-type domain-containing protein                                  |
| augustus-7-processed-gene-65.9-mRNA-1   | Japonica | Indica   |            | Os07g0224900 | OsR498G0713804500.01.T01 | Small nucleolar ribonucleoprotein complex subunit                    |
| augustus-7-processed-gene-66.11-mRNA-1  | Japonica | NA       |            | Os10g0531750 | OsR498G0408675500.01.T01 | Retrotransposon protein, putative, Ty3-gypsy sub-class               |
| augustus-7-processed-gene-67.20-mRNA-1  | Japonica | NA       |            | Os07g0227200 | OsR498G0713819100.01.T01 |                                                                      |
| augustus-7-processed-gene-67.31-mRNA-1  | Japonica | NA       |            | Os07g0227600 |                          | Ethylene-responsive transcription factor CRF3                        |
| augustus-7-processed-gene-67.34-mRNA-1  | Japonica | NA       |            |              |                          | FBD domain-containing protein                                        |
| augustus-7-processed-gene-68.11-mRNA-1  | Japonica | NA       |            | Os07g0230600 |                          | Fe2OG dioxygenase domain-containing protein                          |
| augustus-7-processed-gene-68.18-mRNA-1  | Japonica | NA       |            | Os07g0229900 | OsR498G0713825000.01.T01 | 40S ribosomal protein S12                                            |
| augustus-7-processed-gene-68.3-mRNA-1   | Japonica | Indica   |            | Os07g0229200 | OsR498G0713822600.01.T01 | FBD domain-containing protein                                        |
| augustus-7-processed-gene-69.27-mRNA-1  | Japonica | NA       |            | Os07g0231500 | OsR498G0713829700.01.T01 |                                                                      |
| augustus-7-processed-gene-7.55-mRNA-1   | Japonica | Japonica |            | Os07g0121000 | OsR498G0713426300.01.T04 |                                                                      |
| augustus-7-processed-gene-7.56-mRNA-1   | Japonica | NA       |            | Os07g0120900 | OsR498G0713426300.01.T04 | WW domain-containing protein (Fragment)                              |
| augustus-7-processed-gene-7.57-mRNA-1   | Japonica | NA       |            | Os07g0121100 | OsR498G0713426900.01.T02 |                                                                      |
| augustus-7-processed-gene-7.68-mRNA-1   | Japonica | Japonica |            | Os07g0120000 | OsR498G0713423300.01.T01 | NB-ARC domain-containing protein (Fragment)                          |
| augustus-7-processed-gene-7.71-mRNA-1   | Japonica | NA       |            | Os07g0120500 | OsR498G0713415100.01.T01 | NB-ARC domain-containing protein (Fragment)                          |
| augustus-7-processed-gene-7.73-mRNA-1   | Japonica | NA       |            | Os07g0120500 |                          | F-box domain-containing protein                                      |
| augustus-7-processed-gene-7.75-mRNA-1   | Japonica | Japonica |            | Os07g0120600 | OsR498G0713423300.01.T01 | NB-ARC domain-containing protein (Fragment)                          |
| augustus-7-processed-gene-7.76-mRNA-1   | Japonica | NA       |            |              |                          | Enoyl-CoA hydratase 2, peroxisomal                                   |
| augustus-7-processed-gene-70.11-mRNA-1  | Japonica | NA       |            | Os09g0258800 |                          | Ulp1 protease family, C-terminal catalytic domain containing protein |
| augustus-7-processed-gene-72.2-mRNA-1   | Japonica | NA       |            | Os04g0617200 | OsR498G0409285000.01.T01 |                                                                      |
| augustus-7-processed-gene-72.24-mRNA-1  | Japonica | NA       |            | Os07g0236700 | OsR498G0713848400.01.T02 | Zinc finger, Dof-type                                                |
| augustus-7-processed-gene-72.28-mRNA-1  | Japonica | Japonica |            | Os07g0237900 | OsR498G0613330300.01.T01 |                                                                      |
| augustus-7-processed-gene-73.34-mRNA-1  | Japonica | NA       |            | Os07g0239600 | OsR498G0713856800.01.T03 | Pentatricopeptide repeat-containing protein mitochondrial            |

|                                         |          |          |               |              |                          |                                                                            |
|-----------------------------------------|----------|----------|---------------|--------------|--------------------------|----------------------------------------------------------------------------|
| augustus-7-processed-gene-75.12-mRNA-1  | Japonica | NA       |               | Os07g0242000 |                          |                                                                            |
| augustus-7-processed-gene-75.37-mRNA-1  | Japonica | NA       |               | Os07g0243000 | OsR498G0713868400.01.T01 | UDP-glycosyltransferase 76E4                                               |
| augustus-7-processed-gene-76.2-mRNA-1   | Japonica | NA       |               | Os05g0225100 | OsR498G0510061500.01.T01 | DUF295 domain-containing protein                                           |
| augustus-7-processed-gene-76.42-mRNA-1  | Japonica | NA       |               | Os07g0244400 | OsR498G0713872200.01.T01 | Pentatricopeptide repeat-containing protein, putative                      |
| augustus-7-processed-gene-77.14-mRNA-1  | Japonica | NA       |               | Os07g0246200 | OsR498G0713877300.01.T02 | Calreticulin                                                               |
| augustus-7-processed-gene-77.23-mRNA-1  | Japonica | NA       |               | Os07g0246300 | OsR498G0713877600.01.T02 | Protein transport protein SEC13 B like                                     |
| augustus-7-processed-gene-78.1-mRNA-1   | Japonica | NA       |               |              | OsR498G0713878900.01.T01 | Serine/threonine kinase (Fragment)                                         |
| augustus-7-processed-gene-78.2-mRNA-1   | Japonica | NA       |               | Os07g0247000 | OsR498G0713879300.01.T01 | PMEI domain-containing protein (Fragment)                                  |
| augustus-7-processed-gene-79.29-mRNA-1  | Japonica | Japonica |               | Os07g0250133 | OsR498G0714323900.01.T01 | Glycosyltransferase                                                        |
| augustus-7-processed-gene-79.3-mRNA-1   | Japonica | NA       |               | Os07g0248900 |                          | Putative mutator-like transposase                                          |
| augustus-7-processed-gene-8.0-mRNA-1    | Japonica | Japonica |               | Os07g0121600 | OsR498G0511374000.01.T01 |                                                                            |
| augustus-7-processed-gene-8.4-mRNA-1    | Japonica | NA       |               |              |                          |                                                                            |
| augustus-7-processed-gene-8.5-mRNA-1    | Japonica | NA       |               | Os07g0122200 | OsR498G0713429500.01.T03 |                                                                            |
| augustus-7-processed-gene-8.6-mRNA-1    | Japonica | NA       |               | Os07g0122300 | OsR498G0713429700.01.T01 |                                                                            |
| augustus-7-processed-gene-80.14-mRNA-1  | Japonica | Japonica |               | Os07g0251200 | OsR498G0713892000.01.T01 |                                                                            |
| augustus-7-processed-gene-80.15-mRNA-1  | Japonica | NA       |               | Os07g0251301 |                          | 60S acidic ribosomal protein P2-B                                          |
| augustus-7-processed-gene-81.29-mRNA-1  | Japonica | NA       |               |              | OsR498G0510294600.01.T01 | HGWP repeat containing protein-like                                        |
| augustus-7-processed-gene-83.15-mRNA-1  | Japonica | NA       |               | Os07g0255200 | OsR498G0713577000.01.T01 | ATP-dependent DNA helicase                                                 |
| augustus-7-processed-gene-85.12-mRNA-1  | Japonica | NA       |               | Os07g0257200 | OsR498G0713916200.01.T02 | Metal transporter                                                          |
| augustus-7-processed-gene-86.10-mRNA-1  | Japonica | NA       |               | Os07g0259400 |                          | Pentatricopeptide repeat-containing protein mitochondrial                  |
| augustus-7-processed-gene-88.17-mRNA-1  | Japonica | NA       |               |              | OsR498G0713939900.01.T01 | L-type lectin-domain containing receptor kinase IV.1                       |
| augustus-7-processed-gene-9.29-mRNA-1   | Japonica | NA       |               | Os07g0124000 |                          |                                                                            |
| augustus-7-processed-gene-9.32-mRNA-1   | Japonica | NA       |               | Os07g0123800 | OsR498G0713435600.01.T01 |                                                                            |
| augustus-7-processed-gene-9.33-mRNA-1   | Japonica | NA       |               | Os07g0123900 | OsR498G0713436000.01.T01 | Eggshell protein 2A-like                                                   |
| augustus-7-processed-gene-9.41-mRNA-1   | Japonica | NA       |               |              | OsR498G0713437300.01.T01 | BZIP transcription factor family protein expressed                         |
| augustus-7-processed-gene-90.2-mRNA-1   | Japonica | NA       |               | Os09g0265800 | OsR498G0407753100.01.T01 | HGWP repeat containing protein-like                                        |
| augustus-7-processed-gene-93.17-mRNA-1  | Japonica | Japonica |               | Os07g0268800 | OsR498G0713959500.01.T02 | DUF4220 domain-containing protein (Fragment)                               |
| augustus-7-processed-gene-94.12-mRNA-1  | Japonica | Indica   |               | Os07g0268800 | OsR498G0713961500.01.T01 | DUF4220 domain-containing protein (Fragment)                               |
| augustus-7-processed-gene-95.20-mRNA-1  | Japonica | NA       |               |              | OsR498G0713965300.01.T01 |                                                                            |
| augustus-7-processed-gene-96.0-mRNA-1   | Japonica | NA       |               |              | OsR498G0713967500.01.T01 | DUF4220 domain-containing protein (Fragment)                               |
| augustus-7-processed-gene-96.6-mRNA-1   | Japonica | NA       |               |              | OsR498G0100073600.01.T01 | RNA binding protein                                                        |
| augustus-7-processed-gene-97.10-mRNA-1  | Japonica | NA       |               | Os07g0272400 | OsR498G0713971700.01.T01 | FYVE-type domain-containing protein                                        |
| augustus-7-processed-gene-97.23-mRNA-1  | Japonica | NA       |               | Os07g0272700 | OsR498G0713975100.01.T01 | NAC transcription factor 69                                                |
| augustus-7-processed-gene-99.16-mRNA-1  | Japonica | NA       |               |              | OsR498G0713983500.01.T01 |                                                                            |
| augustus-8-processed-gene-1.19-mRNA-1   | Japonica | NA       |               | Os08g0101700 | OsR498G0815026400.01.T01 | Cytochrome b561 domain-containing protein (Fragment)                       |
| augustus-8-processed-gene-1.20-mRNA-1   | Japonica | NA       |               | Os08g0102000 |                          | Putative N-acetyltransferase ycf52                                         |
| augustus-8-processed-gene-11.47-mRNA-1  | Japonica | NA       |               | Os08g0119800 | OsR498G0815087200.01.T06 | Photosystem II core complex proteins psbY                                  |
| augustus-8-processed-gene-122.25-mRNA-1 | Japonica | NA       |               |              |                          |                                                                            |
| augustus-8-processed-gene-132.21-mRNA-1 | Japonica | NA       |               | Os03g0114600 | OsR498G0612855600.01.T01 | Calcineurin-like phosphoesterase family protein, putative                  |
| augustus-8-processed-gene-14.24-mRNA-1  | Japonica | Japonica | Kinase-TM     | Os08g0124100 | OsR498G0815098200.01.T02 | Putative receptor-type protein kinase LRK1                                 |
| augustus-8-processed-gene-140.6-mRNA-1  | Japonica | NA       |               | Os03g0110200 |                          | Transposon protein, putative, Mutator sub-class, expressed                 |
| augustus-8-processed-gene-153.14-mRNA-1 | Japonica | NA       | Kinase-TM     |              | OsR498G0815808800.01.T01 | Putative glycerophosphodiester phosphodiesterase, protein kinase RLK-Pelle |
| augustus-8-processed-gene-155.17-mRNA-1 | Japonica | NA       |               |              | OsR498G0815821700.01.T01 |                                                                            |
| augustus-8-processed-gene-158.35-mRNA-1 | Japonica | NA       | Kinase-LRR-TM | Os08g0342300 | OsR498G0815837200.01.T01 | Brassinosteroid LRR receptor kinase BRL3                                   |
| augustus-8-processed-gene-16.47-mRNA-1  | Japonica | Japonica |               | Os08g0126800 | OsR498G0815103200.01.T01 | DUF295 domain-containing protein (Fragment)                                |
| augustus-8-processed-gene-161.15-mRNA-1 | Japonica | NA       |               |              | OsR498G0815762600.01.T01 |                                                                            |
| augustus-8-processed-gene-162.16-mRNA-1 | Japonica | Indica   |               | Os10g0461100 | OsR498G0815858000.01.T02 | PsbP family protein, expressed                                             |
| augustus-8-processed-gene-17.50-mRNA-1  | Japonica | NA       |               | Os08g0127800 | OsR498G0815105800.01.T01 | ATP-dependent zinc metalloprotease FTSH protein                            |
| augustus-8-processed-gene-174.21-mRNA-1 | Japonica | NA       |               | Os08g0356700 | OsR498G0815875600.01.T01 |                                                                            |
| augustus-8-processed-gene-176.30-mRNA-1 | Japonica | NA       |               |              | OsR498G0815882100.01.T01 |                                                                            |
| augustus-8-processed-gene-191.39-mRNA-1 | Japonica | NA       |               |              | OsR498G0815957800.01.T01 |                                                                            |
| augustus-8-processed-gene-197.37-mRNA-1 | Japonica | Indica   |               | Os08g0387100 | OsR498G0815983300.01.T01 |                                                                            |
| augustus-8-processed-gene-206.35-mRNA-1 | Japonica | NA       |               |              | OsR498G0816048600.01.T01 | Phorbol-ester/DAG-type domain-containing protein (Fragment)                |
| augustus-8-processed-gene-207.40-mRNA-1 | Japonica | NA       |               | Os08g0406500 | OsR498G0816055400.01.T01 | BTB/POZ and MATH domain-containing protein 2                               |
| augustus-8-processed-gene-208.19-mRNA-1 | Japonica | NA       |               | Os08g0406600 | OsR498G0816056200.01.T01 | Zinc finger POZ domain protein-like                                        |
| augustus-8-processed-gene-208.37-mRNA-1 | Japonica | NA       |               |              | OsR498G0204046800.01.T01 | Circumsporozoite protein-like                                              |
| augustus-8-processed-gene-208.38-mRNA-1 | Japonica | NA       |               |              | OsR498G0816060800.01.T01 |                                                                            |
| augustus-8-processed-gene-208.39-mRNA-1 | Japonica | Japonica |               | Os08g0408300 | OsR498G0816061400.01.T01 |                                                                            |
| augustus-8-processed-gene-21.7-mRNA-1   | Japonica | NA       |               |              |                          | Retrotransposon protein, putative, unclassified, expressed                 |
| augustus-8-processed-gene-210.11-mRNA-1 | Japonica | NA       |               |              | OsR498G0816071400.01.T02 | Polynucleotide adenyllyltransferase                                        |
| augustus-8-processed-gene-210.7-mRNA-1  | Japonica | Japonica |               | Os08g0410266 | OsR498G0816070200.01.T01 | DUF295 domain-containing protein (Fragment)                                |

|                                         |          |          |           |              |                          |                                                                          |
|-----------------------------------------|----------|----------|-----------|--------------|--------------------------|--------------------------------------------------------------------------|
| augustus-8-processed-gene-212.31-mRNA-1 | Japonica | NA       |           | Os08g0416000 | OsR498G0816085600.01.T01 | Class I homeodomain-leucine zipper protein 5                             |
| augustus-8-processed-gene-213.7-mRNA-1  | Japonica | NA       |           | Os08g0417100 | OsR498G0816090200.01.T01 | Putative 2-oxoglutarate-dependent dioxygenase                            |
| augustus-8-processed-gene-228.28-mRNA-1 | Japonica | Indica   |           | Os08g0441900 | OsR498G0816183200.01.T02 | Matrin-type domain-containing protein                                    |
| augustus-8-processed-gene-229.25-mRNA-1 | Japonica | NA       |           | Os08g0442900 | OsR498G0816186400.01.T01 | glycine-rich cell wall structural protein-like                           |
| augustus-8-processed-gene-23.24-mRNA-1  | Japonica | NA       |           |              | OsR498G0815141200.01.T01 | RING-type E3 ubiquitin transferase                                       |
| augustus-8-processed-gene-230.5-mRNA-1  | Japonica | NA       |           | Os08g0444500 | OsR498G0816191600.01.T01 |                                                                          |
| augustus-8-processed-gene-233.23-mRNA-1 | Japonica | Japonica |           | Os08g0451700 | OsR498G0816219600.01.T02 | AT-rich interactive domain-containing protein 4                          |
| augustus-8-processed-gene-236.27-mRNA-1 | Japonica | NA       |           | Os08g0455800 | OsR498G0816234300.01.T01 | Liver carboxylesterase (Fragment)                                        |
| augustus-8-processed-gene-236.30-mRNA-1 | Japonica | NA       |           |              | OsR498G0816232200.01.T01 | T-complex protein 1 subunit delta                                        |
| augustus-8-processed-gene-236.33-mRNA-1 | Japonica | NA       |           | Os08g0456200 | OsR498G0816235600.01.T01 | Flavonoid 3'-monooxygenase                                               |
| augustus-8-processed-gene-238.17-mRNA-1 | Japonica | NA       |           | Os08g0459300 | OsR498G0816246800.01.T01 | F-box domain-containing protein                                          |
| augustus-8-processed-gene-24.24-mRNA-1  | Japonica | NA       |           | Os08g0140500 | OsR498G0815146000.01.T01 | Aromatic-L-amino-acid decarboxylase-like                                 |
| augustus-8-processed-gene-24.34-mRNA-1  | Japonica | Japonica |           | Os08g0141000 | OsR498G0815146600.01.T01 |                                                                          |
| augustus-8-processed-gene-24.40-mRNA-1  | Japonica | Japonica |           | Os08g0140700 | OsR498G0815146800.01.T01 | RING-type domain-containing protein                                      |
| augustus-8-processed-gene-24.44-mRNA-1  | Japonica | NA       |           | Os08g0141700 | OsR498G0815149600.01.T01 |                                                                          |
| augustus-8-processed-gene-240.18-mRNA-1 | Japonica | NA       |           | Os08g0462800 | OsR498G0816257400.01.T01 | Plant viral-response family protein-like                                 |
| augustus-8-processed-gene-243.45-mRNA-1 | Japonica | NA       |           | Os08g0468700 | OsR498G0816276200.01.T01 | Nitrate reductase                                                        |
| augustus-8-processed-gene-244.22-mRNA-1 | Japonica | Japonica |           | Os08g0471100 | OsR498G0102262600.01.T01 | Transposable element protein, putative, MuDR, expressed                  |
| augustus-8-processed-gene-244.24-mRNA-1 | Japonica | NA       |           |              | OsR498G0816287000.01.T01 | Basic helix-loop-helix transcription factor                              |
| augustus-8-processed-gene-245.21-mRNA-1 | Japonica | NA       |           | Os08g0472400 | OsR498G0816290400.01.T01 | Putative zeaxanthin epoxidase                                            |
| augustus-8-processed-gene-246.49-mRNA-1 | Japonica | Japonica |           | Os08g0474500 | OsR498G0816298400.01.T01 | BRI1 kinase inhibitor 1                                                  |
| augustus-8-processed-gene-247.10-mRNA-1 | Japonica | NA       |           | Os08g0475000 | OsR498G0816299200.01.T01 | Tuliposide A-converting enzyme 1, chloroplastic                          |
| augustus-8-processed-gene-248.5-mRNA-1  | Japonica | NA       |           |              | OsR498G0204046800.01.T01 | Epstein-Barr virus EBNA-1-like                                           |
| augustus-8-processed-gene-249.4-mRNA-1  | Japonica | NA       |           | Os08g0478466 | OsR498G0816310200.01.T01 | PPC domain-containing protein (Fragment)                                 |
| augustus-8-processed-gene-25.12-mRNA-1  | Japonica | Japonica |           | Os08g0142900 | OsR498G0815150800.01.T01 | PMEI domain-containing protein                                           |
| augustus-8-processed-gene-254.17-mRNA-1 | Japonica | NA       |           | Os08g0487100 |                          | BZIP domain-containing protein (Fragment)                                |
| augustus-8-processed-gene-262.30-mRNA-1 | Japonica | NA       |           |              |                          | Putative transparent testa                                               |
| augustus-8-processed-gene-263.22-mRNA-1 | Japonica | NA       | LRR-TM    | Os08g0505900 | OsR498G0816425400.01.T01 | DNA-damage-repair/toleration protein DRT100                              |
| augustus-8-processed-gene-263.23-mRNA-1 | Japonica | NA       |           |              | OsR498G0408884400.01.T03 | Epstein-Barr virus EBNA-1-like                                           |
| augustus-8-processed-gene-264.18-mRNA-1 | Japonica | NA       |           | Os08g0507301 |                          |                                                                          |
| augustus-8-processed-gene-264.24-mRNA-1 | Japonica | NA       |           | Os08g0507100 | OsR498G0816430400.01.T01 |                                                                          |
| augustus-8-processed-gene-264.29-mRNA-1 | Japonica | NA       |           |              |                          | Kinesin motor domain-containing protein                                  |
| augustus-8-processed-gene-266.22-mRNA-1 | Japonica | NA       |           | Os08g0510800 | OsR498G0816446400.01.T01 | Cyclic nucleotide-gated ion channel 2                                    |
| augustus-8-processed-gene-267.70-mRNA-1 | Japonica | NA       |           | Os08g0513300 |                          | Ribosomal protein S24/S35 mitochondrial                                  |
| augustus-8-processed-gene-269.10-mRNA-1 | Japonica | NA       |           | Os08g0515800 |                          | Mitochondrial transcription termination factor                           |
| augustus-8-processed-gene-269.28-mRNA-1 | Japonica | NA       |           | Os08g0516600 | OsR498G0816464400.01.T01 | Cyclin-dependent protein kinase inhibitor SMR3                           |
| augustus-8-processed-gene-270.36-mRNA-1 | Japonica | NA       |           | Os08g0517600 | OsR498G0816467200.01.T04 | S-adenosyl-L-methionine-dependent methyltransferases superfamily protein |
| augustus-8-processed-gene-270.56-mRNA-1 | Japonica | Japonica |           | Os08g0518200 | OsR498G0816469400.01.T01 | Mitochondrial transcription termination factor                           |
| augustus-8-processed-gene-270.61-mRNA-1 | Japonica | Indica   |           | Os08g0519100 | OsR498G0816473200.01.T01 | L-gulonolactone oxidase                                                  |
| augustus-8-processed-gene-272.41-mRNA-1 | Japonica | NA       |           | Os08g0520600 | OsR498G0816481000.01.T01 |                                                                          |
| augustus-8-processed-gene-273.21-mRNA-1 | Japonica | NA       |           |              | OsR498G0816486800.01.T01 | TD and POZ domain-containing protein 3 (Fragment)                        |
| augustus-8-processed-gene-274.53-mRNA-1 | Japonica | Japonica |           | Os08g0526100 | OsR498G0917763200.01.T01 | UDP-D-glucuronate 4-epimerase 6                                          |
| augustus-8-processed-gene-283.64-mRNA-1 | Japonica | NA       |           |              | OsR498G0816542800.01.T01 |                                                                          |
| augustus-8-processed-gene-285.16-mRNA-1 | Japonica | NA       |           | Os04g0184800 |                          | Transposon protein, putative, Mutator sub-class, expressed               |
| augustus-8-processed-gene-285.39-mRNA-1 | Japonica | NA       |           | Os02g0778800 |                          |                                                                          |
| augustus-8-processed-gene-286.21-mRNA-1 | Japonica | NA       | CC-NBS-TM | Os08g0543100 |                          | Putative NBS-LRR resistance protein RGH1                                 |
| augustus-8-processed-gene-286.42-mRNA-1 | Japonica | NA       |           | Os09g0519100 | OsR498G0917808800.01.T01 | BHLH transcription factor                                                |
| augustus-8-processed-gene-287.15-mRNA-1 | Japonica | NA       |           | Os08g0544800 | OsR498G0816564400.01.T02 | Transcription factor PCF2                                                |
| augustus-8-processed-gene-287.16-mRNA-1 | Japonica | NA       |           | Os08g0545000 |                          | Pyridoxal phosphate (PLP)-dependent transferase superfamily protein      |
| augustus-8-processed-gene-287.17-mRNA-1 | Japonica | NA       |           | Os08g0545400 | OsR498G0816566200.01.T01 | Dehydration-responsive element-binding protein 1J                        |
| augustus-8-processed-gene-287.18-mRNA-1 | Japonica | Japonica |           | Os08g0545500 | OsR498G0917817800.01.T01 | Dehydration-responsive element-binding protein 1A                        |
| augustus-8-processed-gene-287.21-mRNA-1 | Japonica | NA       |           | Os08g0545900 | OsR498G0816568200.01.T01 | Protein DETOXIFICATION                                                   |
| augustus-8-processed-gene-288.48-mRNA-1 | Japonica | NA       |           | Os08g0547200 | OsR498G0816572100.01.T01 | small G protein signaling modulator 1 isoform X1                         |
| augustus-8-processed-gene-289.1-mRNA-1  | Japonica | NA       |           | Os08g0547900 | OsR498G0816576400.01.T01 | Geraniol 8-hydroxylase                                                   |
| augustus-8-processed-gene-290.76-mRNA-1 | Japonica | NA       |           | Os08g0550700 | OsR498G0816586000.01.T02 | Auxin-responsive protein SAUR36-like                                     |
| augustus-8-processed-gene-292.28-mRNA-1 | Japonica | NA       |           |              |                          | Skp1 domain-containing protein                                           |
| augustus-8-processed-gene-293.57-mRNA-1 | Japonica | NA       |           | Os08g0557200 | OsR498G0816600400.01.T01 | Manganese-dependent ADP-ribose/CDP-alcohol diphosphatase-like            |
| augustus-8-processed-gene-295.24-mRNA-1 | Japonica | NA       |           | Os08g0562600 | OsR498G0816619400.01.T06 | C2 domain-containing protein (Fragment)                                  |
| augustus-8-processed-gene-296.13-mRNA-1 | Japonica | Japonica |           | Os08g0563200 | OsR498G0816620000.01.T01 | AT-hook motif nuclear-localized protein 20                               |
| augustus-8-processed-gene-296.16-mRNA-1 | Japonica | NA       |           |              | OsR498G0816621000.01.T01 | RING-H2 finger protein ATLSK                                             |
| augustus-8-processed-gene-296.37-mRNA-1 | Japonica | NA       |           | Os08g0564500 | OsR498G0816624200.01.T01 | zinc finger protein 593 homolog                                          |

|                                         |          |          |               |              |                          |                                                            |
|-----------------------------------------|----------|----------|---------------|--------------|--------------------------|------------------------------------------------------------|
| augustus-8-processed-gene-296.38-mRNA-1 | Japonica | NA       | Kinase-LRR-TM | Os08g0564700 | OsR498G0816627000.01.T01 | Serine/threonine protein kinase                            |
| augustus-8-processed-gene-297.53-mRNA-1 | Japonica | NA       |               | Os08g0565200 | OsR498G0816629600.01.T01 | Dehydration-responsive element-binding protein 2C          |
| augustus-8-processed-gene-297.80-mRNA-1 | Japonica | Japonica |               | Os08g0565700 | OsR498G0816630800.01.T05 | Histone-lysine N-methyltransferase family member SUVH2     |
| augustus-8-processed-gene-3.20-mRNA-1   | Japonica | NA       |               | Os08g0105400 | OsR498G0815038200.01.T01 | Indole-2-monooxygenase                                     |
| augustus-8-processed-gene-3.21-mRNA-1   | Japonica | Japonica |               | Os08g0105600 | OsR498G0815038400.01.T01 | 3-hydroxyindolin-2-one monooxygenase                       |
| augustus-8-processed-gene-3.23-mRNA-1   | Japonica | Indica   |               | Os08g0105400 | OsR498G0815038600.01.T01 | Indole-2-monooxygenase                                     |
| augustus-8-processed-gene-3.3-mRNA-1    | Japonica | NA       |               | Os08g0104400 | OsR498G0815034200.01.T01 | Seed maturation protein                                    |
| augustus-8-processed-gene-37.9-mRNA-1   | Japonica | NA       |               | Os08g0159900 | OsR498G0815240800.01.T04 | DEAD-box ATP-dependent RNA helicase 42                     |
| augustus-8-processed-gene-39.47-mRNA-1  | Japonica | NA       |               | Os08g0162400 | OsR498G0815252800.01.T01 | RING finger protein 5                                      |
| augustus-8-processed-gene-4.12-mRNA-1   | Japonica | NA       |               | Os08g0106100 |                          |                                                            |
| augustus-8-processed-gene-4.32-mRNA-1   | Japonica | NA       |               | Os08g0107100 | OsR498G0815041800.01.T04 | Polyadenylate-binding protein 1-B-binding protein          |
| augustus-8-processed-gene-4.36-mRNA-1   | Japonica | NA       |               | Os08g0108100 | OsR498G0815044600.01.T01 | Pectinesterase inhibitor 28                                |
| augustus-8-processed-gene-4.37-mRNA-1   | Japonica | NA       |               | Os08g0108300 | OsR498G0815045600.01.T01 | Nuclear receptor subfamily 4 group A member 3              |
| augustus-8-processed-gene-40.39-mRNA-1  | Japonica | NA       |               | Os08g0165300 |                          |                                                            |
| augustus-8-processed-gene-45.24-mRNA-1  | Japonica | Japonica |               | Os08g0174500 | OsR498G0815298200.01.T02 | Truncated days to heading 8                                |
| augustus-8-processed-gene-45.6-mRNA-1   | Japonica | NA       |               | Os08g0173700 | OsR498G0815297000.01.T01 | Ethylene-responsive transcription factor ERF088            |
| augustus-8-processed-gene-47.15-mRNA-1  | Japonica | NA       |               | Os08g0178100 | OsR498G0815307700.01.T01 | vacuolar protein sorting-associated protein 18 homolog     |
| augustus-8-processed-gene-47.22-mRNA-1  | Japonica | NA       |               |              |                          | Similarity to RNase H                                      |
| augustus-8-processed-gene-5.39-mRNA-1   | Japonica | NA       |               | Os08g0108500 | OsR498G0815046800.01.T01 | Basic helix-loop-helix transcription factor                |
| augustus-8-processed-gene-59.34-mRNA-1  | Japonica | NA       |               | Os08g0201100 | OsR498G0815382600.01.T01 |                                                            |
| augustus-8-processed-gene-6.21-mRNA-1   | Japonica | NA       |               | Os08g0111300 | OsR498G0815058200.01.T01 | Putative acetyltransferase                                 |
| augustus-8-processed-gene-6.6-mRNA-1    | Japonica | NA       |               | Os08g0110300 | OsR498G0815055200.01.T01 | Longin domain-containing protein                           |
| augustus-8-processed-gene-64.20-mRNA-1  | Japonica | NA       |               |              | OsR498G0815402700.01.T01 | GTP-binding protein ERG                                    |
| augustus-8-processed-gene-64.27-mRNA-1  | Japonica | NA       |               | Os08g0207800 |                          | Peptidase A1 domain-containing protein                     |
| augustus-8-processed-gene-64.34-mRNA-1  | Japonica | Japonica |               | Os08g0208300 | OsR498G1018122200.01.T01 |                                                            |
| augustus-8-processed-gene-65.8-mRNA-1   | Japonica | NA       |               |              | OsR498G1120154400.01.T01 | Endonuclease                                               |
| augustus-8-processed-gene-66.14-mRNA-1  | Japonica | NA       |               |              |                          | Cell wall protein-like                                     |
| augustus-8-processed-gene-7.22-mRNA-1   | Japonica | NA       |               | Os08g0112200 | OsR498G0815060200.01.T01 | Putative acetyltransferase                                 |
| augustus-8-processed-gene-7.23-mRNA-1   | Japonica | NA       |               | Os08g0112300 | OsR498G0815060400.01.T01 | Putative acetyltransferase                                 |
| augustus-8-processed-gene-7.24-mRNA-1   | Japonica | NA       |               | Os08g0112400 | OsR498G0815060600.01.T01 | Pentatricopeptide repeat-containing protein                |
| augustus-8-processed-gene-7.5-mRNA-1    | Japonica | NA       |               | Os08g0111800 | OsR498G0815058600.01.T01 | Putative acetyltransferase                                 |
| augustus-8-processed-gene-75.17-mRNA-1  | Japonica | NA       |               | Os03g0110200 |                          | Transposon protein, putative, Mutator sub-class, expressed |
| augustus-8-processed-gene-75.19-mRNA-1  | Japonica | NA       |               | Os08g0220400 | OsR498G0815445900.01.T01 | Pectinesterase                                             |
| augustus-8-processed-gene-78.29-mRNA-1  | Japonica | NA       |               |              | OsR498G0815456200.01.T01 |                                                            |
| augustus-8-processed-gene-79.25-mRNA-1  | Japonica | Japonica |               | Os08g0225100 | OsR498G0815469000.01.T03 | Reticulon domain-containing protein (Fragment)             |
| augustus-8-processed-gene-8.33-mRNA-1   | Japonica | Japonica |               | Os08g0113500 | OsR498G0815064300.01.T01 | NAC domain containing protein 35                           |
| augustus-8-processed-gene-8.35-mRNA-1   | Japonica | NA       |               | Os08g0113400 |                          | Putative methyltransferase PMT21                           |
| augustus-8-processed-gene-80.21-mRNA-1  | Japonica | NA       |               | Os04g0286500 | OsR498G0916692600.01.T01 | Transposon protein, putative, Pong sub-class, expressed    |
| augustus-8-processed-gene-80.22-mRNA-1  | Japonica | Japonica |               | Os08g0226800 | OsR498G0815473500.01.T01 | TD and POZ domain-containing protein 4                     |
| augustus-8-processed-gene-80.23-mRNA-1  | Japonica | Indica   |               | Os08g0226800 | OsR498G0815471800.01.T01 | TD and POZ domain-containing protein 4                     |
| augustus-8-processed-gene-81.7-mRNA-1   | Japonica | NA       |               | Os08g0227100 | OsR498G0815475400.01.T02 | BTB domain-containing protein (Fragment)                   |
| augustus-8-processed-gene-81.8-mRNA-1   | Japonica | NA       |               | Os08g0227200 | OsR498G0815475600.01.T01 | Speckle-type POZ protein                                   |
| augustus-8-processed-gene-82.8-mRNA-1   | Japonica | NA       |               |              | OsR498G0815482600.01.T01 |                                                            |
| augustus-8-processed-gene-83.24-mRNA-1  | Japonica | NA       |               | Os08g0230500 | OsR498G0815486600.01.T02 | Endonuclease or glycosyl hydrolase                         |
| augustus-8-processed-gene-86.13-mRNA-1  | Japonica | NA       |               | Os08g0235800 | OsR498G0815502400.01.T01 | WRKY transcription factor                                  |
| augustus-8-processed-gene-86.28-mRNA-1  | Japonica | Japonica | CC-Kinase-TM  | Os08g0230800 | OsR498G0815488100.01.T01 | Non-specific serine/threonine protein kinase               |
| augustus-8-processed-gene-89.42-mRNA-1  | Japonica | NA       |               |              | OsR498G0306506500.01.T01 |                                                            |
| augustus-8-processed-gene-90.27-mRNA-1  | Japonica | Indica   |               | Os02g0797300 | OsR498G0815517200.01.T01 | Plasma membrane ATPase                                     |
| augustus-8-processed-gene-91.51-mRNA-1  | Japonica | NA       |               | Os08g0243900 | OsR498G0815525200.01.T04 | MHD domain-containing protein (Fragment)                   |
| augustus-8-processed-gene-93.30-mRNA-1  | Japonica | NA       |               | Os08g0246300 | OsR498G0815530100.01.T01 | Disease resistance protein RPM1                            |
| augustus-8-processed-gene-99.15-mRNA-1  | Japonica | NA       |               | Os10g0460000 | OsR498G0305532000.01.T01 | Kinesin heavy chain-like                                   |
| augustus-8-processed-gene-99.30-mRNA-1  | Japonica | NA       | NBS-TM        | Os08g0258700 | OsR498G0815569000.01.T01 | Nucleotide-binding leucine-rich-repeat protein 1           |
| augustus-9-processed-gene-104.52-mRNA-1 | Japonica | Indica   |               | Os09g0353400 | OsR498G0917228700.01.T01 | Oxoglutarate-dependent dioxygenase 2                       |
| augustus-9-processed-gene-105.19-mRNA-1 | Japonica | NA       |               |              |                          | NAM-associated domain-containing protein (Fragment)        |
| augustus-9-processed-gene-108.28-mRNA-1 | Japonica | NA       |               | Os09g0347300 | OsR498G0917209900.01.T01 | Exocyst subunit Exo70 family protein (Fragment)            |
| augustus-9-processed-gene-112.18-mRNA-1 | Japonica | NA       |               | Os09g0338400 | OsR498G0917192300.01.T01 | Cysteine desulfurase                                       |
| augustus-9-processed-gene-114.38-mRNA-1 | Japonica | NA       |               |              |                          | Transposon protein, putative, Mutator sub-class, expressed |
| augustus-9-processed-gene-119.47-mRNA-1 | Japonica | NA       |               | Os09g0361400 | OsR498G0917246900.01.T01 | Mitochondrial outer membrane porin                         |
| augustus-9-processed-gene-12.26-mRNA-1  | Japonica | NA       |               |              | OsR498G0916689600.01.T01 | WIYLD domain-containing protein                            |
| augustus-9-processed-gene-121.26-mRNA-1 | Japonica | Japonica | LRR-NBS-TM    | Os09g0365000 | OsR498G0917259000.01.T01 | PPC domain-containing protein                              |
| augustus-9-processed-gene-125.49-mRNA-1 | Japonica | NA       |               | Os07g0693100 | OsR498G1018918700.01.T01 | Pyruvate decarboxylase                                     |

|                                         |          |          |  |              |                          |                                                                             |
|-----------------------------------------|----------|----------|--|--------------|--------------------------|-----------------------------------------------------------------------------|
| augustus-9-processed-gene-125.71-mRNA-1 | Japonica | NA       |  | Os09g0372900 | OsR498G0917292200.01.T02 | Protein kinase domain-containing protein                                    |
| augustus-9-processed-gene-127.29-mRNA-1 | Japonica | Indica   |  | Os09g0376400 | OsR498G0917299200.01.T01 | BHLH domain-containing protein                                              |
| augustus-9-processed-gene-127.4-mRNA-1  | Japonica | NA       |  |              | OsR498G0917294800.01.T01 | Pentatricopeptide repeat-containing protein mitochondrial                   |
| augustus-9-processed-gene-128.30-mRNA-1 | Japonica | NA       |  | Os02g0651200 |                          |                                                                             |
| augustus-9-processed-gene-129.12-mRNA-1 | Japonica | Japonica |  | Os09g0379300 | OsR498G0917311200.01.T01 | Glycosyltransferase                                                         |
| augustus-9-processed-gene-129.34-mRNA-1 | Japonica | NA       |  | Os09g0379900 | OsR498G0917313200.01.T01 | Endo-1,3(4)-beta-glucanase                                                  |
| augustus-9-processed-gene-131.20-mRNA-1 | Japonica | NA       |  |              |                          | BED-type domain-containing protein                                          |
| augustus-9-processed-gene-133.28-mRNA-1 | Japonica | Indica   |  | Os09g0387150 | OsR498G0917343200.01.T03 |                                                                             |
| augustus-9-processed-gene-133.3-mRNA-1  | Japonica | NA       |  | Os09g0386200 | OsR498G0917340000.01.T01 | RING-type E3 ubiquitin transferase                                          |
| augustus-9-processed-gene-133.6-mRNA-1  | Japonica | NA       |  |              | OsR498G0917342000.01.T01 | AUGMIN subunit like                                                         |
| augustus-9-processed-gene-138.2-mRNA-1  | Japonica | NA       |  | Os09g0394300 | OsR498G0917376000.01.T02 | Endoglucanase                                                               |
| augustus-9-processed-gene-147.41-mRNA-1 | Japonica | NA       |  | Os09g0411600 | OsR498G0917435800.01.T03 | Tetratricopeptide repeat (TPR)-like superfamily protein, putative isoform 1 |
| augustus-9-processed-gene-147.68-mRNA-1 | Japonica | NA       |  |              | OsR498G0917439000.01.T01 | S-adenosylmethionine decarboxylase proenzyme                                |
| augustus-9-processed-gene-147.71-mRNA-1 | Japonica | Japonica |  | Os09g0413300 | OsR498G0917441800.01.T03 | Pentatricopeptide repeat-containing protein chloroplastic                   |
| augustus-9-processed-gene-149.17-mRNA-1 | Japonica | NA       |  | Os09g0415300 | OsR498G0917452000.01.T01 |                                                                             |
| augustus-9-processed-gene-149.4-mRNA-1  | Japonica | NA       |  |              | OsR498G0917449000.01.T03 | Zinc-finger homeodomain protein 9                                           |
| augustus-9-processed-gene-154.23-mRNA-1 | Japonica | NA       |  | Os09g0424300 | OsR498G0917484800.01.T01 | S-adenosylmethionine decarboxylase proenzyme                                |
| augustus-9-processed-gene-155.13-mRNA-1 | Japonica | NA       |  | Os09g0425200 | OsR498G0917486200.01.T01 | Putative cell-wall protein (Fragment)                                       |
| augustus-9-processed-gene-156.32-mRNA-1 | Japonica | NA       |  |              | OsR498G0408432600.01.T01 |                                                                             |
| augustus-9-processed-gene-158.20-mRNA-1 | Japonica | NA       |  |              |                          | CBS domain-containing protein                                               |
| augustus-9-processed-gene-159.1-mRNA-1  | Japonica | Indica   |  | Os09g0431900 | OsR498G0917513200.01.T01 | Zinc finger protein KNUCKLES                                                |
| augustus-9-processed-gene-159.21-mRNA-1 | Japonica | NA       |  | Os09g0433000 | OsR498G0917516800.01.T01 | Hexosyltransferase                                                          |
| augustus-9-processed-gene-160.31-mRNA-1 | Japonica | NA       |  | Os09g0433700 | OsR498G0917518800.01.T01 | Pectinesterase                                                              |
| augustus-9-processed-gene-160.32-mRNA-1 | Japonica | NA       |  | Os09g0433700 | OsR498G0917518800.01.T01 | Pectinesterase                                                              |
| augustus-9-processed-gene-160.54-mRNA-1 | Japonica | NA       |  | Os09g0434900 | OsR498G0917523000.01.T01 | IBR domain-containing protein                                               |
| augustus-9-processed-gene-162.28-mRNA-1 | Japonica | NA       |  | Os09g0438100 | OsR498G0917532800.01.T01 |                                                                             |
| augustus-9-processed-gene-165.3-mRNA-1  | Japonica | Indica   |  | Os08g0499400 | OsR498G0917547600.01.T01 |                                                                             |
| augustus-9-processed-gene-166.41-mRNA-1 | Japonica | Indica   |  | Os05g0567400 | OsR498G0917558800.01.T01 | Putative rRNA methyltransferase                                             |
| augustus-9-processed-gene-168.25-mRNA-1 | Japonica | NA       |  | Os09g0449000 | OsR498G0917576300.01.T01 | PHD finger protein MALE STERILITY like                                      |
| augustus-9-processed-gene-168.30-mRNA-1 | Japonica | Japonica |  | Os09g0448100 | OsR498G0917580500.01.T06 | F-box protein interaction domain containing protein, expressed              |
| augustus-9-processed-gene-168.33-mRNA-1 | Japonica | NA       |  | Os09g0449100 |                          | Transposon protein, putative, CACTA, En/Spm sub-class                       |
| augustus-9-processed-gene-168.7-mRNA-1  | Japonica | Indica   |  | Os01g0587300 | OsR498G0917572600.01.T01 | Phosphoribosylanthranilate transferase-like protein                         |
| augustus-9-processed-gene-17.17-mRNA-1  | Japonica | NA       |  |              |                          |                                                                             |
| augustus-9-processed-gene-172.34-mRNA-1 | Japonica | NA       |  | Os09g0455500 | OsR498G0917604800.01.T01 | Tuliposide A-converting enzyme 2, chloroplastic                             |
| augustus-9-processed-gene-172.41-mRNA-1 | Japonica | NA       |  | Os09g0455900 | OsR498G0917605400.01.T01 | Tuliposide A-converting enzyme b1, amyloplastic                             |
| augustus-9-processed-gene-173.1-mRNA-1  | Japonica | NA       |  | Os09g0456800 | OsR498G0917608700.01.T01 | Heat shock transcription factor                                             |
| augustus-9-processed-gene-173.17-mRNA-1 | Japonica | NA       |  | Os07g0418100 |                          | ATP-dependent DNA helicase                                                  |
| augustus-9-processed-gene-173.22-mRNA-1 | Japonica | NA       |  | Os09g0336500 | OsR498G1220975100.01.T01 | Zinc knuckle family protein                                                 |
| augustus-9-processed-gene-173.3-mRNA-1  | Japonica | NA       |  | Os09g0456700 | OsR498G0917608000.01.T01 |                                                                             |
| augustus-9-processed-gene-174.37-mRNA-1 | Japonica | NA       |  | Os09g0459600 | OsR498G0917618800.01.T01 | PPM-type phosphatase domain-containing protein                              |
| augustus-9-processed-gene-175.34-mRNA-1 | Japonica | NA       |  | Os09g0462200 | OsR498G0917625800.01.T01 | Tuliposide A-converting enzyme 2, chloroplastic                             |
| augustus-9-processed-gene-176.33-mRNA-1 | Japonica | NA       |  | Os09g0464100 |                          |                                                                             |
| augustus-9-processed-gene-176.35-mRNA-1 | Japonica | Indica   |  | Os08g0478466 | OsR498G0917637200.01.T01 | PPC domain-containing protein (Fragment)                                    |
| augustus-9-processed-gene-178.20-mRNA-1 | Japonica | Japonica |  | Os09g0467500 | OsR498G0917649000.01.T01 | Purine transporter                                                          |
| augustus-9-processed-gene-178.23-mRNA-1 | Japonica | NA       |  | Os09g0468150 | OsR498G0917650800.01.T01 | Clathrin assembly protein                                                   |
| augustus-9-processed-gene-178.25-mRNA-1 | Japonica | NA       |  | Os09g0468300 | OsR498G0917651200.01.T01 | E3 ubiquitin-protein like                                                   |
| augustus-9-processed-gene-178.6-mRNA-1  | Japonica | NA       |  | Os09g0466400 | OsR498G0917645800.01.T01 | Zinc-finger homeodomain protein 1                                           |
| augustus-9-processed-gene-179.27-mRNA-1 | Japonica | NA       |  |              | OsR498G0917654200.01.T04 | RING-H2 finger protein ATL52                                                |
| augustus-9-processed-gene-182.29-mRNA-1 | Japonica | NA       |  | Os09g0474000 |                          | BZIP transcription factor                                                   |
| augustus-9-processed-gene-182.42-mRNA-1 | Japonica | NA       |  |              | OsR498G0917671300.01.T01 | Pentatricopeptide repeat-containing protein, chloroplastic                  |
| augustus-9-processed-gene-182.56-mRNA-1 | Japonica | NA       |  | Os09g0474800 | OsR498G0917674800.01.T01 | Phosphatidylinositol 4-kinase type 2-alpha                                  |
| augustus-9-processed-gene-187.13-mRNA-1 | Japonica | Indica   |  | Os09g0482780 | OsR498G0917706600.01.T02 | Fasciclin-like arabinogalactan protein 7                                    |
| augustus-9-processed-gene-187.38-mRNA-1 | Japonica | NA       |  | Os09g0482860 | OsR498G0917707800.01.T01 | Glycosyltransferase                                                         |
| augustus-9-processed-gene-187.40-mRNA-1 | Japonica | NA       |  | Os09g0482900 | OsR498G0917708600.01.T01 | Glycosyltransferase                                                         |
| augustus-9-processed-gene-187.42-mRNA-1 | Japonica | NA       |  | Os09g0483600 | OsR498G0917709600.01.T03 | JmjC domain-containing protein 7                                            |
| augustus-9-processed-gene-187.45-mRNA-1 | Japonica | NA       |  | Os08g0165300 |                          |                                                                             |
| augustus-9-processed-gene-189.20-mRNA-1 | Japonica | NA       |  | Os09g0490200 | OsR498G0917725400.01.T02 | Ethylene signal transcription factor                                        |
| augustus-9-processed-gene-190.20-mRNA-1 | Japonica | NA       |  | Os09g0491676 | OsR498G0917731000.01.T01 | Cyclic nucleotide-gated ion channel 2                                       |
| augustus-9-processed-gene-192.7-mRNA-1  | Japonica | Indica   |  | Os04g0577000 | OsR498G0917738000.01.T04 | Ubiquitin fusion degradation protein 1                                      |
| augustus-9-processed-gene-195.32-mRNA-1 | Japonica | NA       |  |              | OsR498G0917759200.01.T04 |                                                                             |
| augustus-9-processed-gene-195.38-mRNA-1 | Japonica | NA       |  |              |                          | FBD domain-containing protein                                               |

|                                          |          |          |               |                          |                          |                                                                   |
|------------------------------------------|----------|----------|---------------|--------------------------|--------------------------|-------------------------------------------------------------------|
| augustus-9-processed-gene-196.50-mRNA-1  | Japonica | NA       |               | Os09g0504000             | OsR498G0917763200.01.T01 | UDP-D-glucuronate 4-epimerase 6                                   |
| augustus-9-processed-gene-197.66-mRNA-1  | Japonica | NA       |               |                          | OsR498G0917769800.01.T01 |                                                                   |
| augustus-9-processed-gene-198.7-mRNA-1   | Japonica | NA       |               | Os09g0507900             |                          | Calmodulin binding protein                                        |
| augustus-9-processed-gene-201.109-mRNA-1 | Japonica | NA       |               | Os09g0514200             | OsR498G0917793800.01.T02 | Calcium-dependent protein kinase                                  |
| augustus-9-processed-gene-203.53-mRNA-1  | Japonica | NA       |               |                          | OsR498G0917809200.01.T01 |                                                                   |
| augustus-9-processed-gene-205.6-mRNA-1   | Japonica | NA       |               |                          | OsR498G0917816200.01.T01 | SPX domain-containing membrane protein isoform A                  |
| augustus-9-processed-gene-205.9-mRNA-1   | Japonica | NA       | Os09g0522100  | OsR498G0917817400.01.T01 |                          | C-repeat binding factor 3                                         |
| augustus-9-processed-gene-212.14-mRNA-1  | Japonica | NA       | Os09g0535500  | OsR498G0917860600.01.T01 |                          | RING-H2 finger protein ATL2A                                      |
| augustus-9-processed-gene-214.39-mRNA-1  | Japonica | NA       | Os09g0540500  | OsR498G0917882200.01.T01 |                          | Mediator of RNA polymerase II transcription subunit 4             |
| augustus-9-processed-gene-214.52-mRNA-1  | Japonica | Japonica | Os09g0540800  | OsR498G0917882700.01.T01 |                          | Absciscic acid-insensitive 5-like protein 2-like                  |
| augustus-9-processed-gene-214.59-mRNA-1  | Japonica | Japonica | Os09g0541100  | OsR498G0917884600.01.T01 |                          | Phytoecyanin domain-containing protein                            |
| augustus-9-processed-gene-215.37-mRNA-1  | Japonica | NA       | Os09g0543400  | OsR498G0917892000.01.T01 |                          | Diaminopimelate decarboxylase 2 chloroplastic                     |
| augustus-9-processed-gene-218.78-mRNA-1  | Japonica | NA       | Os09g0549500  | OsR498G0917917200.01.T02 |                          | U11/U12 small nuclear ribonucleoprotein 31 kDa protein (Fragment) |
| augustus-9-processed-gene-218.79-mRNA-1  | Japonica | Japonica | Os09g0549700  | OsR498G0917917600.01.T02 |                          | Ribosomal protein L18/L5                                          |
| augustus-9-processed-gene-22.29-mRNA-1   | Japonica | NA       |               | OsR498G0408153000.01.T01 |                          | Splicing coactivator subunit-like                                 |
| augustus-9-processed-gene-220.73-mRNA-1  | Japonica | NA       | Os09g0553100  | OsR498G0917927000.01.T01 |                          | Multifunctional fusion protein                                    |
| augustus-9-processed-gene-221.46-mRNA-1  | Japonica | NA       | Os09g0554200  | OsR498G0917930200.01.T01 |                          | probable E3 ubiquitin-protein ligase ATL44                        |
| augustus-9-processed-gene-222.40-mRNA-1  | Japonica | Indica   | Os02g0184100  | OsR498G0917939700.01.T01 |                          | Zinc finger protein hangover                                      |
| augustus-9-processed-gene-223.32-mRNA-1  | Japonica | NA       | Os09g0559000  | OsR498G0917945400.01.T01 |                          | Putative E3 ubiquitin-protein ligase ARI5                         |
| augustus-9-processed-gene-223.33-mRNA-1  | Japonica | NA       | Os09g0559100  | OsR498G0917945800.01.T01 |                          | Putative E3 ubiquitin-protein ligase ARI5                         |
| augustus-9-processed-gene-223.35-mRNA-1  | Japonica | Indica   | Os09g0559400  | OsR498G0917946400.01.T01 |                          | DUF4220 domain-containing protein (Fragment)                      |
| augustus-9-processed-gene-223.8-mRNA-1   | Japonica | NA       |               | OsR498G0917941800.01.T01 |                          | DOMON domain-containing protein                                   |
| augustus-9-processed-gene-224.58-mRNA-1  | Japonica | NA       | Os09g0560300  | OsR498G0917948400.01.T01 |                          | Malic enzyme                                                      |
| augustus-9-processed-gene-225.20-mRNA-1  | Japonica | NA       | Os09g0563950  |                          |                          | DUF295 domain-containing protein                                  |
| augustus-9-processed-gene-225.22-mRNA-1  | Japonica | NA       |               | OsR498G1120619900.01.T01 |                          | Splicing factor 3B subunit 4                                      |
| augustus-9-processed-gene-226.9-mRNA-1   | Japonica | Indica   | Os09g0564000  | OsR498G0917959000.01.T01 |                          | Cathepsin K                                                       |
| augustus-9-processed-gene-227.41-mRNA-1  | Japonica | NA       | Os09g0566400  | OsR498G0917963800.01.T01 |                          | Protein kinase domain-containing protein                          |
| augustus-9-processed-gene-227.42-mRNA-1  | Japonica | NA       | Os09g0566400  | OsR498G0917963800.01.T01 |                          | Protein kinase domain-containing protein                          |
| augustus-9-processed-gene-227.49-mRNA-1  | Japonica | Indica   | Os08g0557300  | OsR498G0917966400.01.T01 |                          |                                                                   |
| augustus-9-processed-gene-228.93-mRNA-1  | Japonica | Indica   | Os09g0568700  | OsR498G0917970600.01.T01 |                          | Germin-like protein 9-3                                           |
| augustus-9-processed-gene-228.94-mRNA-1  | Japonica | NA       | Os09g0568700  | OsR498G0917971000.01.T01 |                          | Germin-like protein 9-3                                           |
| augustus-9-processed-gene-229.83-mRNA-1  | Japonica | Japonica | Os09g0571200  | OsR498G0816619400.01.T06 |                          | C2 calcium-dependent membrane targeting                           |
| augustus-9-processed-gene-229.86-mRNA-1  | Japonica | NA       |               | OsR498G0917979800.01.T01 |                          | Ethylene-responsive transcription factor                          |
| augustus-9-processed-gene-23.22-mRNA-1   | Japonica | NA       | Os09g0127700  | OsR498G0916739000.01.T01 |                          |                                                                   |
| augustus-9-processed-gene-230.3-mRNA-1   | Japonica | NA       | Kinase-TM     | Os09g0572100             |                          | lysM domain receptor-like kinase 3                                |
| augustus-9-processed-gene-25.26-mRNA-1   | Japonica | NA       |               |                          | OsR498G0916743600.01.T02 |                                                                   |
| augustus-9-processed-gene-30.29-mRNA-1   | Japonica | NA       | Os09g0135800  | OsR498G0916770000.01.T01 |                          | protein CELLULOSE SYNTHASE INTERACTIVE 1-like                     |
| augustus-9-processed-gene-30.32-mRNA-1   | Japonica | NA       | Os05g0267732  | OsR498G0510213400.01.T01 |                          |                                                                   |
| augustus-9-processed-gene-4.39-mRNA-1    | Japonica | Japonica | Os09g0103400  | OsR498G0916647000.01.T01 |                          |                                                                   |
| augustus-9-processed-gene-41.25-mRNA-1   | Japonica | NA       |               |                          |                          | Auxin transport protein BIG                                       |
| augustus-9-processed-gene-41.42-mRNA-1   | Japonica | NA       |               | OsR498G0916819000.01.T01 |                          | Annexin Max4                                                      |
| augustus-9-processed-gene-42.34-mRNA-1   | Japonica | NA       |               |                          |                          |                                                                   |
| augustus-9-processed-gene-44.19-mRNA-1   | Japonica | Japonica | Kinase-TM     | Os09g0251250             | OsR498G0916836300.01.T01 | Serine/threonine protein kinase                                   |
| augustus-9-processed-gene-44.26-mRNA-1   | Japonica | NA       | Os09g0251500  | OsR498G0100917100.01.T04 |                          | Pentatricopeptide repeat-containing protein, chloroplastic        |
| augustus-9-processed-gene-57.20-mRNA-1   | Japonica | Japonica | Os09g0270900  | OsR498G0916883200.01.T02 |                          | Cysteine desulfuration                                            |
| augustus-9-processed-gene-57.22-mRNA-1   | Japonica | Indica   | Os09g0271100  | OsR498G0916884000.01.T01 |                          | HMA domain-containing protein                                     |
| augustus-9-processed-gene-58.13-mRNA-1   | Japonica | NA       |               |                          |                          | Transposon protein, putative, Mutator sub-class                   |
| augustus-9-processed-gene-59.32-mRNA-1   | Japonica | NA       | Os09g0273800  | OsR498G0916892000.01.T01 |                          | SCF ubiquitin ligase complex protein SKP1a                        |
| augustus-9-processed-gene-59.9-mRNA-1    | Japonica | Japonica | Os09g0272900  | OsR498G0916894000.01.T01 |                          | Skp1 domain-containing protein (Fragment)                         |
| augustus-9-processed-gene-60.6-mRNA-1    | Japonica | NA       | Os09g0273800  | OsR498G0916892000.01.T01 |                          | Skp1 domain-containing protein                                    |
| augustus-9-processed-gene-62.10-mRNA-1   | Japonica | NA       | Os08g0561800  | OsR498G0408675500.01.T01 |                          | 4-diphosphocytidyl-2C-methyl-D-erythritol synthase                |
| augustus-9-processed-gene-65.2-mRNA-1    | Japonica | NA       | Os09g0282300  |                          |                          | Zinc finger protein WIP2                                          |
| augustus-9-processed-gene-65.24-mRNA-1   | Japonica | NA       |               | OsR498G0916922600.01.T01 |                          | Putative disease resistance protein RGA3                          |
| augustus-9-processed-gene-65.6-mRNA-1    | Japonica | NA       |               | OsR498G0916921200.01.T01 |                          |                                                                   |
| augustus-9-processed-gene-7.4-mRNA-1     | Japonica | NA       | Os09g0106700  | OsR498G0916657400.01.T01 |                          | Tuber-specific and sucrose-responsive element binding factor      |
| augustus-9-processed-gene-74.22-mRNA-1   | Japonica | NA       | Kinase-LRR-TM | Os09g0293500             | OsR498G0917002400.01.T01 | Brassinosteroid LRR receptor kinase BRL1                          |
| augustus-9-processed-gene-76.0-mRNA-1    | Japonica | NA       | Os09g0295000  | OsR498G0917006600.01.T01 |                          | NAC domain-containing protein (Fragment)                          |
| augustus-9-processed-gene-76.3-mRNA-1    | Japonica | Japonica | Os09g0295700  | OsR498G0917007400.01.T01 |                          | Ankyrin repeat and SOCS box protein 3                             |
| augustus-9-processed-gene-84.43-mRNA-1   | Japonica | NA       |               | OsR498G0917046500.01.T02 |                          | Mediator of RNA polymerase II transcription subunit 25            |
| augustus-9-processed-gene-9.33-mRNA-1    | Japonica | NA       |               | OsR498G0916670900.01.T04 |                          | CitMHS domain-containing protein (Fragment)                       |
| augustus-9-processed-gene-94.8-mRNA-1    | Japonica | NA       |               |                          |                          |                                                                   |

|                                                |          |          |            |              |                          |                                                                           |
|------------------------------------------------|----------|----------|------------|--------------|--------------------------|---------------------------------------------------------------------------|
| augustus-9-processed-gene-96.31-mRNA-1         | Japonica | NA       |            | Os09g0325000 |                          | F-box domain-containing protein                                           |
| augustus-9-processed-gene-97.7-mRNA-1          | Japonica | NA       |            |              |                          |                                                                           |
| augustus-9-processed-gene-99.31-mRNA-1         | Japonica | NA       |            | Os09g0329200 | OsR498G0917166200.01.T01 | Glycosyltransferase                                                       |
| augustus_masked-1-processed-gene-10.16-mRNA-1  | Japonica | Indica   |            | Os01g0119500 | OsR498G0100063000.01.T01 |                                                                           |
| augustus_masked-1-processed-gene-101.40-mRNA-1 | Japonica | NA       |            |              | OsR498G0100676800.01.T01 | Temperature sensing protein-related                                       |
| augustus_masked-1-processed-gene-103.29-mRNA-1 | Japonica | NA       |            | Os07g0543700 | OsR498G1120733700.01.T01 | Retrotransposon protein, putative, Ty3-gypsy sub-class                    |
| augustus_masked-1-processed-gene-108.23-mRNA-1 | Japonica | NA       |            | Os01g0293000 | OsR498G0100722000.01.T02 | S-adenosylmethionine synthase                                             |
| augustus_masked-1-processed-gene-109.50-mRNA-1 | Japonica | NA       |            |              |                          | N(6)-L-threonylcarbamoyladenine synthase                                  |
| augustus_masked-1-processed-gene-110.37-mRNA-1 | Japonica | Indica   |            | Os05g0539300 | OsR498G0100732200.01.T01 | DUF295 domain-containing protein                                          |
| augustus_masked-1-processed-gene-111.61-mRNA-1 | Japonica | Japonica |            | Os01g0299700 | OsR498G0100738800.01.T01 | 3'-5' exonuclease domain-containing protein (Fragment)                    |
| augustus_masked-1-processed-gene-111.62-mRNA-1 | Japonica | NA       |            |              | OsR498G0100738600.01.T01 | Alpha/beta hydrolase related protein                                      |
| augustus_masked-1-processed-gene-112.19-mRNA-1 | Japonica | NA       |            | Os01g0301500 | OsR498G0100745200.01.T01 | Pentatricopeptide repeat-containing protein mitochondrial                 |
| augustus_masked-1-processed-gene-118.52-mRNA-1 | Japonica | NA       |            | Os01g0311600 | OsR498G0100779400.01.T01 | Sulfotransferase                                                          |
| augustus_masked-1-processed-gene-123.20-mRNA-1 | Japonica | NA       |            |              |                          |                                                                           |
| augustus_masked-1-processed-gene-124.41-mRNA-1 | Japonica | NA       |            |              | OsR498G0100817800.01.T01 | Delta(1)-pyrroline-2-carboxylate reductase                                |
| augustus_masked-1-processed-gene-125.33-mRNA-1 | Japonica | Indica   |            | Os01g0293000 | OsR498G0100820800.01.T01 | S-adenosylmethionine synthase                                             |
| augustus_masked-1-processed-gene-125.39-mRNA-1 | Japonica | Indica   |            | Os08g0545400 | OsR498G0100826200.01.T01 | Dehydration-responsive element-binding protein 1J                         |
| augustus_masked-1-processed-gene-128.24-mRNA-1 | Japonica | NA       |            |              |                          | Endonuclease                                                              |
| augustus_masked-1-processed-gene-13.36-mRNA-1  | Japonica | NA       |            | Os01g0125500 | OsR498G0100084600.01.T04 | RING-type E3 ubiquitin transferase                                        |
| augustus_masked-1-processed-gene-130.14-mRNA-1 | Japonica | NA       |            |              |                          | Gibberellin 2-beta-dioxygenase 2                                          |
| augustus_masked-1-processed-gene-135.45-mRNA-1 | Japonica | Japonica |            | Os01g0340600 | OsR498G0100874800.01.T01 |                                                                           |
| augustus_masked-1-processed-gene-135.47-mRNA-1 | Japonica | NA       |            | Os01g0341000 |                          |                                                                           |
| augustus_masked-1-processed-gene-136.12-mRNA-1 | Japonica | Japonica |            | Os01g0341200 | OsR498G0100874800.01.T01 |                                                                           |
| augustus_masked-1-processed-gene-136.22-mRNA-1 | Japonica | Indica   |            | Os06g0489700 | OsR498G0100876900.01.T01 | DUF295 domain-containing protein                                          |
| augustus_masked-1-processed-gene-136.28-mRNA-1 | Japonica | NA       |            | Os01g0342500 |                          |                                                                           |
| augustus_masked-1-processed-gene-137.5-mRNA-1  | Japonica | Japonica |            | Os01g0343100 | OsR498G0100882700.01.T01 | DUF4220 domain-containing protein (Fragment)                              |
| augustus_masked-1-processed-gene-138.26-mRNA-1 | Japonica | NA       |            |              | OsR498G0100887200.01.T01 |                                                                           |
| augustus_masked-1-processed-gene-139.38-mRNA-1 | Japonica | NA       |            | Os01g0346700 | OsR498G0100895200.01.T01 | Putative glycine-rich cell wall structural protein 1.0                    |
| augustus_masked-1-processed-gene-139.41-mRNA-1 | Japonica | Japonica |            | Os01g0347200 | OsR498G0100897800.01.T01 |                                                                           |
| augustus_masked-1-processed-gene-146.27-mRNA-1 | Japonica | Japonica |            | Os01g0357900 | OsR498G0204493300.01.T02 | Rapid Alkalinization Factor                                               |
| augustus_masked-1-processed-gene-147.20-mRNA-1 | Japonica | NA       | NBS-TM     | Os01g0359400 | OsR498G0100940200.01.T05 | Truncated powdery mildew resistance protein Pm3                           |
| augustus_masked-1-processed-gene-147.22-mRNA-1 | Japonica | Japonica | LRR-NBS-TM | Os01g0359800 | OsR498G0100941400.01.T02 | Powdery mildew resistance protein PM3 variant                             |
| augustus_masked-1-processed-gene-149.26-mRNA-1 | Japonica | NA       |            | Os01g0362100 | OsR498G0100949800.01.T01 | Acytransferase-like protein chloroplastic                                 |
| augustus_masked-1-processed-gene-150.19-mRNA-1 | Japonica | NA       |            | Os01g0364400 | OsR498G0100955800.01.T01 | Wall-associated receptor kinase 3                                         |
| augustus_masked-1-processed-gene-151.19-mRNA-1 | Japonica | NA       |            |              | OsR498G0100957400.01.T01 | Wall-associated receptor kinase 3                                         |
| augustus_masked-1-processed-gene-155.37-mRNA-1 | Japonica | Indica   |            | Os01g0373400 | OsR498G0714828400.01.T01 | NAM-associated domain-containing protein (Fragment)                       |
| augustus_masked-1-processed-gene-156.37-mRNA-1 | Japonica | NA       |            | Os01g0375100 | OsR498G0100985200.01.T03 | J domain-containing protein (Fragment)                                    |
| augustus_masked-1-processed-gene-158.23-mRNA-1 | Japonica | NA       |            | Os07g0691100 | OsR498G0715007300.01.T01 | Pectinesterase                                                            |
| augustus_masked-1-processed-gene-161.25-mRNA-1 | Japonica | NA       |            | Os01g0382400 | OsR498G0100996100.01.T01 | Pathogenesis-related protein 1-2                                          |
| augustus_masked-1-processed-gene-178.20-mRNA-1 | Japonica | NA       |            | Os01g0498300 | OsR498G0101052000.01.T01 | Protein O-linked-mannose beta-1,4-N-acetylglucosaminyltransferase 2 (Frag |
| augustus_masked-1-processed-gene-181.37-mRNA-1 | Japonica | NA       |            | Os05g0574300 | OsR498G0305687300.01.T01 | Histone domain-containing protein                                         |
| augustus_masked-1-processed-gene-182.10-mRNA-1 | Japonica | NA       |            | Os01g0504100 | OsR498G0101070200.01.T01 | Purine permease 4                                                         |
| augustus_masked-1-processed-gene-182.25-mRNA-1 | Japonica | NA       |            |              | OsR498G0101073300.01.T01 | RING-type domain-containing protein                                       |
| augustus_masked-1-processed-gene-183.15-mRNA-1 | Japonica | NA       |            | Os01g0505500 | OsR498G0101075200.01.T01 | Pentatricopeptide repeat-containing protein, mitochondrial                |
| augustus_masked-1-processed-gene-186.29-mRNA-1 | Japonica | NA       |            | Os01g0510200 | OsR498G0101096000.01.T01 |                                                                           |
| augustus_masked-1-processed-gene-187.21-mRNA-1 | Japonica | NA       |            | Os01g0511200 | OsR498G0101102600.01.T01 | Copper ion binding                                                        |
| augustus_masked-1-processed-gene-187.3-mRNA-1  | Japonica | Indica   |            | Os01g0511000 | OsR498G0101099600.01.T01 | LOB transcription factor                                                  |
| augustus_masked-1-processed-gene-192.4-mRNA-1  | Japonica | NA       |            | Os12g0468900 | OsR498G0407549800.01.T01 | Cell wall protein-like                                                    |
| augustus_masked-1-processed-gene-198.24-mRNA-1 | Japonica | Indica   |            | Os01g0530500 | OsR498G0101164000.01.T01 | DUF295 domain-containing protein                                          |
| augustus_masked-1-processed-gene-199.34-mRNA-1 | Japonica | NA       |            | Os01g0532300 | OsR498G0101169200.01.T01 |                                                                           |
| augustus_masked-1-processed-gene-2.38-mRNA-1   | Japonica | NA       |            | Os01g0102000 |                          | Non-hemolytic phospholipase C                                             |
| augustus_masked-1-processed-gene-200.17-mRNA-1 | Japonica | Indica   |            | Os02g0822300 | OsR498G0101174600.01.T01 | 1,3-beta-glucan synthase                                                  |
| augustus_masked-1-processed-gene-220.39-mRNA-1 | Japonica | NA       |            | Os02g0102850 | OsR498G0307365000.01.T04 |                                                                           |
| augustus_masked-1-processed-gene-220.40-mRNA-1 | Japonica | NA       |            | Os01g0561600 | OsR498G0101341800.01.T01 | Oryzaalexin D synthase                                                    |
| augustus_masked-1-processed-gene-222.25-mRNA-1 | Japonica | NA       |            | Os01g0564600 |                          | Cell wall protein-like                                                    |
| augustus_masked-1-processed-gene-224.11-mRNA-1 | Japonica | NA       |            | Os01g0566800 | OsR498G0101357600.01.T01 | Transcription factor bHLH87                                               |
| augustus_masked-1-processed-gene-225.24-mRNA-1 | Japonica | NA       |            | Os01g0568400 |                          | Cysteine-rich receptor-like protein kinase 15                             |
| augustus_masked-1-processed-gene-226.38-mRNA-1 | Japonica | NA       |            |              | OsR498G0101368000.01.T01 |                                                                           |
| augustus_masked-1-processed-gene-228.7-mRNA-1  | Japonica | NA       |            | Os11g0708500 | OsR498G1018251600.01.T01 | Pyridoxal biosynthesis lyase pdxS                                         |
| augustus_masked-1-processed-gene-229.0-mRNA-1  | Japonica | Japonica |            | Os01g0575500 | OsR498G0101383200.01.T01 | DENN domain and WD repeat-containing protein SCD1                         |
| augustus_masked-1-processed-gene-229.21-mRNA-1 | Japonica | NA       |            |              | OsR498G0101387800.01.T01 |                                                                           |

|                                                |          |          |               |              |                          |                                                               |
|------------------------------------------------|----------|----------|---------------|--------------|--------------------------|---------------------------------------------------------------|
| augustus_masked-1-processed-gene-231.44-mRNA-1 | Japonica | NA       |               |              |                          | SP-RING-type domain-containing protein                        |
| augustus_masked-1-processed-gene-231.69-mRNA-1 | Japonica | Japonica |               | Os01g0580300 | OsR498G0307172900.01.T05 | Cullin 4                                                      |
| augustus_masked-1-processed-gene-236.30-mRNA-1 | Japonica | NA       |               | Os01g0587500 |                          | SHSP domain-containing protein                                |
| augustus_masked-1-processed-gene-25.36-mRNA-1  | Japonica | NA       |               |              |                          | Factor of DNA methylation 4                                   |
| augustus_masked-1-processed-gene-260.26-mRNA-1 | Japonica | NA       |               | Os01g0632000 |                          | Putative GPI-anchored protein 58                              |
| augustus_masked-1-processed-gene-261.33-mRNA-1 | Japonica | NA       |               | Os01g0635550 | OsR498G0101603800.01.T02 | Zinc-finger homeodomain protein 5                             |
| augustus_masked-1-processed-gene-266.41-mRNA-1 | Japonica | NA       |               |              | OsR498G0101637600.01.T01 | F-box domain-containing protein (Fragment)                    |
| augustus_masked-1-processed-gene-266.42-mRNA-1 | Japonica | NA       |               | Os01g0644200 | OsR498G0101637800.01.T01 | Little protein 1                                              |
| augustus_masked-1-processed-gene-267.44-mRNA-1 | Japonica | NA       |               | Os01g0645900 | OsR498G0101644400.01.T01 | Molybdate transporter like                                    |
| augustus_masked-1-processed-gene-268.45-mRNA-1 | Japonica | NA       |               | Os01g0648700 | OsR498G0101654400.01.T01 | Transcription factor GTE4                                     |
| augustus_masked-1-processed-gene-269.75-mRNA-1 | Japonica | NA       |               |              | OsR498G0101656600.01.T01 |                                                               |
| augustus_masked-1-processed-gene-275.26-mRNA-1 | Japonica | Japonica |               | Os01g0660000 | OsR498G0101694200.01.T01 |                                                               |
| augustus_masked-1-processed-gene-276.12-mRNA-1 | Japonica | NA       |               | Os01g0660700 | OsR498G0101696800.01.T01 | DUF295 domain-containing protein                              |
| augustus_masked-1-processed-gene-277.15-mRNA-1 | Japonica | Indica   |               | Os07g0443500 | OsR498G0101702400.01.T01 | SANT domain-containing protein                                |
| augustus_masked-1-processed-gene-28.60-mRNA-1  | Japonica | NA       |               | Os01g0152300 | OsR498G0100191200.01.T01 | Histone domain-containing protein                             |
| augustus_masked-1-processed-gene-280.18-mRNA-1 | Japonica | Japonica | Kinase-TM     | Os01g0668600 | OsR498G0101726500.01.T01 | Serine/threonine-protein kinase                               |
| augustus_masked-1-processed-gene-280.20-mRNA-1 | Japonica | NA       | Kinase-TM     | Os01g0669100 | OsR498G0101727800.01.T01 | Non-specific serine/threonine protein kinase                  |
| augustus_masked-1-processed-gene-281.23-mRNA-1 | Japonica | NA       | Kinase-TM     | Os01g0670100 | OsR498G0101730000.01.T01 | Non-specific serine/threonine protein kinase                  |
| augustus_masked-1-processed-gene-281.25-mRNA-1 | Japonica | NA       |               | Os01g0670500 |                          |                                                               |
| augustus_masked-1-processed-gene-282.15-mRNA-1 | Japonica | NA       |               |              | OsR498G0101735400.01.T01 | Pentatricopeptide repeat-containing protein                   |
| augustus_masked-1-processed-gene-282.16-mRNA-1 | Japonica | NA       |               |              | OsR498G0101737000.01.T02 | 1,3-beta-glucan synthase                                      |
| augustus_masked-1-processed-gene-283.22-mRNA-1 | Japonica | NA       |               | Os01g0674000 | OsR498G0101745200.01.T01 | 6b-interacting protein 1                                      |
| augustus_masked-1-processed-gene-283.24-mRNA-1 | Japonica | Indica   |               | Os05g0560400 | OsR498G0101747200.01.T01 | Tubby-like F-box protein 1                                    |
| augustus_masked-1-processed-gene-284.23-mRNA-1 | Japonica | NA       |               | Os01g0675800 | OsR498G0101751200.01.T01 | NAC domain-containing protein 72                              |
| augustus_masked-1-processed-gene-285.32-mRNA-1 | Japonica | NA       |               | Os01g0677100 | OsR498G0101756200.01.T02 |                                                               |
| augustus_masked-1-processed-gene-288.5-mRNA-1  | Japonica | NA       |               |              | OsR498G0101774600.01.T01 | GPI transamidase component Gaa                                |
| augustus_masked-1-processed-gene-290.62-mRNA-1 | Japonica | NA       |               | Os01g0687400 | OsR498G0101789800.01.T01 | Acidic endochitinase                                          |
| augustus_masked-1-processed-gene-291.42-mRNA-1 | Japonica | NA       |               |              | OsR498G0101792600.01.T01 |                                                               |
| augustus_masked-1-processed-gene-291.60-mRNA-1 | Japonica | Japonica |               | Os01g0689900 | OsR498G0101799400.01.T02 | Receptor-like protein kinase-like                             |
| augustus_masked-1-processed-gene-291.61-mRNA-1 | Japonica | NA       |               | Os01g0690200 | OsR498G0101800200.01.T01 | Protein kinase domain-containing protein                      |
| augustus_masked-1-processed-gene-292.73-mRNA-1 | Japonica | NA       |               | Os01g0691300 | OsR498G0101801400.01.T01 | AAI domain-containing protein                                 |
| augustus_masked-1-processed-gene-292.76-mRNA-1 | Japonica | NA       |               |              |                          |                                                               |
| augustus_masked-1-processed-gene-293.29-mRNA-1 | Japonica | Japonica |               | Os01g0693400 | OsR498G0101809000.01.T03 | AP2/ERF and B3 domain-containing transcription repressor TEM1 |
| augustus_masked-1-processed-gene-293.42-mRNA-1 | Japonica | NA       |               | Os01g0693800 | OsR498G0101813200.01.T01 | Threonine synthase                                            |
| augustus_masked-1-processed-gene-298.71-mRNA-1 | Japonica | Indica   |               | Os01g0704300 | OsR498G0101846200.01.T01 | Kelch repeat-containing F-box-like protein                    |
| augustus_masked-1-processed-gene-299.35-mRNA-1 | Japonica | NA       |               | Os03g0395700 |                          |                                                               |
| augustus_masked-1-processed-gene-300.49-mRNA-1 | Japonica | NA       |               | Os01g0707500 | OsR498G0101859800.01.T02 | Transcription factor bHLH87                                   |
| augustus_masked-1-processed-gene-301.72-mRNA-1 | Japonica | NA       |               |              | OsR498G0101865200.01.T01 |                                                               |
| augustus_masked-1-processed-gene-302.56-mRNA-1 | Japonica | NA       |               | Os01g0710200 | OsR498G0101867800.01.T01 | Polyamine oxidase                                             |
| augustus_masked-1-processed-gene-302.57-mRNA-1 | Japonica | NA       |               | Os01g0710700 | OsR498G0101869400.01.T04 | Phospholipase A1-lgamma2, chloroplastic                       |
| augustus_masked-1-processed-gene-302.81-mRNA-1 | Japonica | NA       |               |              | OsR498G0101873200.01.T01 |                                                               |
| augustus_masked-1-processed-gene-303.6-mRNA-1  | Japonica | NA       |               | Os01g0712700 | OsR498G0101875000.01.T01 | Cytidine deaminase                                            |
| augustus_masked-1-processed-gene-304.65-mRNA-1 | Japonica | NA       |               | Os01g0715900 | OsR498G0101886400.01.T01 | Pentatricopeptide repeat-containing protein, chloroplastic    |
| augustus_masked-1-processed-gene-305.22-mRNA-1 | Japonica | NA       |               |              | OsR498G0101897800.01.T01 |                                                               |
| augustus_masked-1-processed-gene-306.22-mRNA-1 | Japonica | NA       | Kinase-LRR-TM | Os01g0718300 | OsR498G0101902000.01.T01 | Brassinosteroid-insensitive 1                                 |
| augustus_masked-1-processed-gene-306.23-mRNA-1 | Japonica | NA       |               | Os01g0718900 | OsR498G0101903800.01.T02 | Trihelix transcription factor ASIL1                           |
| augustus_masked-1-processed-gene-307.62-mRNA-1 | Japonica | Indica   |               | Os10g0160600 | OsR498G0101912800.01.T01 |                                                               |
| augustus_masked-1-processed-gene-309.26-mRNA-1 | Japonica | NA       |               |              | OsR498G0101927200.01.T01 |                                                               |
| augustus_masked-1-processed-gene-310.26-mRNA-1 | Japonica | NA       |               | Os01g0727600 |                          |                                                               |
| augustus_masked-1-processed-gene-310.27-mRNA-1 | Japonica | NA       |               | Os01g0727700 |                          | Thiamine thiazole synthase (Fragment)                         |
| augustus_masked-1-processed-gene-311.29-mRNA-1 | Japonica | Indica   |               | Os01g0730200 | OsR498G0101936400.01.T01 | FBD domain-containing protein                                 |
| augustus_masked-1-processed-gene-311.30-mRNA-1 | Japonica | NA       |               | Os01g0730400 |                          |                                                               |
| augustus_masked-1-processed-gene-311.31-mRNA-1 | Japonica | Indica   |               | Os01g0730600 | OsR498G0101938000.01.T01 |                                                               |
| augustus_masked-1-processed-gene-314.35-mRNA-1 | Japonica | NA       |               | Os01g0735900 | OsR498G0101953400.01.T01 | Glycosyltransferase                                           |
| augustus_masked-1-processed-gene-314.37-mRNA-1 | Japonica | NA       |               | Os01g0736100 | OsR498G0101953800.01.T01 | Glycosyltransferase                                           |
| augustus_masked-1-processed-gene-314.38-mRNA-1 | Japonica | Japonica |               | Os01g0736300 | OsR498G0101954200.01.T01 | Glycosyltransferase                                           |
| augustus_masked-1-processed-gene-314.69-mRNA-1 | Japonica | NA       |               | Os01g0736600 | OsR498G0101955400.01.T01 | RING-H2 finger protein ATL68                                  |
| augustus_masked-1-processed-gene-314.70-mRNA-1 | Japonica | Indica   |               | Os01g0737100 | OsR498G0101956800.01.T01 |                                                               |
| augustus_masked-1-processed-gene-316.55-mRNA-1 | Japonica | Japonica |               | Os01g0740700 | OsR498G0204773100.01.T01 | TIR domain-containing adapter molecule 1                      |
| augustus_masked-1-processed-gene-317.4-mRNA-1  | Japonica | NA       |               |              | OsR498G0101972400.01.T02 | rRNA methyltransferase 1, mitochondrial                       |
| augustus_masked-1-processed-gene-318.57-mRNA-1 | Japonica | NA       |               |              | OsR498G0101981600.01.T01 |                                                               |



|                                                |          |          |           |              |                          |                                                                         |
|------------------------------------------------|----------|----------|-----------|--------------|--------------------------|-------------------------------------------------------------------------|
| augustus_masked-1-processed-gene-320.46-mRNA-1 | Japonica | NA       |           | Os01g0747600 |                          | Pentatricopeptide repeat-containing protein mitochondrial               |
| augustus_masked-1-processed-gene-320.69-mRNA-1 | Japonica | NA       |           | Os01g0748200 | OsR498G0101990600.01.T01 | Protodermal factor 1-like                                               |
| augustus_masked-1-processed-gene-320.70-mRNA-1 | Japonica | NA       |           | Os01g0748300 | OsR498G0101991000.01.T01 |                                                                         |
| augustus_masked-1-processed-gene-323.30-mRNA-1 | Japonica | NA       |           | Os01g0754701 | OsR498G0102012800.01.T01 | Pentatricopeptide repeat-containing protein                             |
| augustus_masked-1-processed-gene-324.53-mRNA-1 | Japonica | Indica   |           | Os04g0208500 | OsR498G0102018800.01.T01 | F-box domain-containing protein                                         |
| augustus_masked-1-processed-gene-325.60-mRNA-1 | Japonica | Indica   |           | Os01g0757600 | OsR498G0102023400.01.T01 | Myosin heavy chain 1 (Fragment)                                         |
| augustus_masked-1-processed-gene-325.61-mRNA-1 | Japonica | NA       |           |              |                          | Pentatricopeptide repeat                                                |
| augustus_masked-1-processed-gene-326.19-mRNA-1 | Japonica | NA       |           |              | OsR498G0511427100.01.T01 | Epstein-Barr virus EBNA-1-like                                          |
| augustus_masked-1-processed-gene-326.20-mRNA-1 | Japonica | NA       | Kinase-TM | Os01g0759200 | OsR498G0102036200.01.T01 | Non-specific serine/threonine protein kinase                            |
| augustus_masked-1-processed-gene-326.21-mRNA-1 | Japonica | NA       | Kinase-TM | Os01g0759400 | OsR498G0102036600.01.T01 | Non-specific serine/threonine protein kinase                            |
| augustus_masked-1-processed-gene-327.27-mRNA-1 | Japonica | NA       |           |              | OsR498G0306953600.01.T01 | probable isoaspartyl peptidase/L-asparaginase 2                         |
| augustus_masked-1-processed-gene-327.6-mRNA-1  | Japonica | NA       | TIR-TM    | Os01g0760400 | OsR498G0102039800.01.T01 | ADP-ribosyl cyclase/cyclic ADP-ribose hydrolase                         |
| augustus_masked-1-processed-gene-328.45-mRNA-1 | Japonica | NA       |           | Os01g0763200 | OsR498G0102046000.01.T04 | TCP transcription factor                                                |
| augustus_masked-1-processed-gene-328.65-mRNA-1 | Japonica | NA       |           | Os11g0631900 |                          |                                                                         |
| augustus_masked-1-processed-gene-329.58-mRNA-1 | Japonica | NA       |           | Os01g0764950 | OsR498G0102052200.01.T05 | Pentatricopeptide repeat-containing protein                             |
| augustus_masked-1-processed-gene-329.67-mRNA-1 | Japonica | NA       |           | Os01g0766200 | OsR498G0102054200.01.T02 | E3 ubiquitin-protein ligase RMA1H1                                      |
| augustus_masked-1-processed-gene-330.37-mRNA-1 | Japonica | NA       |           | Os01g0766300 | OsR498G0102055400.01.T01 |                                                                         |
| augustus_masked-1-processed-gene-332.20-mRNA-1 | Japonica | NA       |           | Os01g0771000 | OsR498G0102067800.01.T01 | Translation initiation factor eIF-2B subunit alpha                      |
| augustus_masked-1-processed-gene-332.4-mRNA-1  | Japonica | NA       |           | Os01g0770200 | OsR498G0102066200.01.T01 | Tyrosine decarboxylase                                                  |
| augustus_masked-1-processed-gene-332.5-mRNA-1  | Japonica | NA       |           | Os01g0770400 | OsR498G0102066400.01.T02 | F-box family protein-like                                               |
| augustus_masked-1-processed-gene-334.32-mRNA-1 | Japonica | NA       |           | Os01g0773500 |                          |                                                                         |
| augustus_masked-1-processed-gene-334.53-mRNA-1 | Japonica | NA       |           | Os01g0774100 |                          | Gnk2-homologous domain-containing protein                               |
| augustus_masked-1-processed-gene-336.77-mRNA-1 | Japonica | NA       |           | Os01g0778900 | OsR498G0102096000.01.T01 |                                                                         |
| augustus_masked-1-processed-gene-337.19-mRNA-1 | Japonica | NA       |           | Os01g0779800 | OsR498G0102098200.01.T01 | Serine/arginine repetitive matrix protein 1                             |
| augustus_masked-1-processed-gene-338.56-mRNA-1 | Japonica | NA       |           | Os01g0783700 | OsR498G0102108600.01.T01 | Calcium-binding protein PBP1                                            |
| augustus_masked-1-processed-gene-339.36-mRNA-1 | Japonica | Japonica |           | Os01g0785600 | OsR498G0511115700.01.T02 | S-adenosyl-L-methionine-dependent methyltransferase superfamily protein |
| augustus_masked-1-processed-gene-341.24-mRNA-1 | Japonica | NA       | CC-NBS-TM | Os01g0788500 | OsR498G0102125800.01.T03 | Disease resistance protein RPS2                                         |
| augustus_masked-1-processed-gene-341.25-mRNA-1 | Japonica | NA       |           | Os01g0788900 | OsR498G0102126800.01.T01 | Pentatricopeptide repeat                                                |
| augustus_masked-1-processed-gene-342.7-mRNA-1  | Japonica | NA       |           | Os01g0793300 |                          | Catechol oxidase                                                        |
| augustus_masked-1-processed-gene-343.4-mRNA-1  | Japonica | NA       |           | Os01g0793800 | OsR498G0102129800.01.T01 | Protein odd-skipped                                                     |
| augustus_masked-1-processed-gene-343.41-mRNA-1 | Japonica | Indica   |           | Os10g0402400 | OsR498G0102133400.01.T01 |                                                                         |
| augustus_masked-1-processed-gene-343.46-mRNA-1 | Japonica | NA       |           |              | OsR498G0102136800.01.T01 |                                                                         |
| augustus_masked-1-processed-gene-343.5-mRNA-1  | Japonica | NA       |           |              | OsR498G0204046800.01.T01 | Epstein-Barr virus EBNA-1-like                                          |
| augustus_masked-1-processed-gene-343.6-mRNA-1  | Japonica | NA       |           | Os01g0793900 | OsR498G0102130200.01.T01 | Protein odd-skipped                                                     |
| augustus_masked-1-processed-gene-343.7-mRNA-1  | Japonica | NA       |           | Os01g0794100 | OsR498G0102130600.01.T01 | Protein odd-skipped                                                     |
| augustus_masked-1-processed-gene-345.30-mRNA-1 | Japonica | NA       |           | Os01g0800300 | OsR498G0102148800.01.T04 | Polyadenylate-binding protein 1-B-binding protein                       |
| augustus_masked-1-processed-gene-346.48-mRNA-1 | Japonica | NA       |           | Os01g0802200 |                          | WAS/WASL-interacting protein family member 3-like                       |
| augustus_masked-1-processed-gene-347.43-mRNA-1 | Japonica | NA       |           |              | OsR498G0102163600.01.T01 |                                                                         |
| augustus_masked-1-processed-gene-347.7-mRNA-1  | Japonica | Japonica |           | Os01g0802850 | OsR498G0511097100.01.T04 | Plastidic phosphate translocator-like protein1                          |
| augustus_masked-1-processed-gene-38.21-mRNA-1  | Japonica | NA       |           | Os01g0174100 | OsR498G0100247800.01.T01 | MAPK kinase substrate protein                                           |
| augustus_masked-1-processed-gene-4.64-mRNA-1   | Japonica | NA       |           | Os01g0106500 | OsR498G0100023600.01.T01 |                                                                         |
| augustus_masked-1-processed-gene-4.65-mRNA-1   | Japonica | Japonica |           | Os01g0106600 | OsR498G0100023800.01.T01 |                                                                         |
| augustus_masked-1-processed-gene-40.8-mRNA-1   | Japonica | NA       |           | Os01g0177400 | OsR498G0100258600.01.T01 | GA 3beta-hydroxylase                                                    |
| augustus_masked-1-processed-gene-42.29-mRNA-1  | Japonica | NA       | LRR-TM    | Os01g0180000 | OsR498G0100270600.01.T01 | Leucine-rich repeat extensin-like protein 3                             |
| augustus_masked-1-processed-gene-44.32-mRNA-1  | Japonica | NA       |           | Os01g0182400 | OsR498G0100278600.01.T01 | TSL-kinase interacting protein 1                                        |
| augustus_masked-1-processed-gene-475.28-mRNA-1 | Japonica | NA       |           |              | OsR498G0102562800.01.T03 | glycine-rich RNA-binding protein 4, mitochondrial                       |
| augustus_masked-1-processed-gene-475.29-mRNA-1 | Japonica | NA       |           | Os01g0913400 | OsR498G0102562800.01.T01 | RRM domain-containing protein                                           |
| augustus_masked-1-processed-gene-475.35-mRNA-1 | Japonica | NA       |           | Os01g0914600 | OsR498G0102565000.01.T05 | Pentatricopeptide repeat-containing protein chloroplastic               |
| augustus_masked-1-processed-gene-475.7-mRNA-1  | Japonica | NA       |           | Os01g0912900 | OsR498G0102561600.01.T02 | Pentatricopeptide repeat-containing protein, mitochondrial              |
| augustus_masked-1-processed-gene-475.8-mRNA-1  | Japonica | NA       |           | Os01g0913100 | OsR498G0102562000.01.T02 | Nuclear transition protein like                                         |
| augustus_masked-1-processed-gene-476.60-mRNA-1 | Japonica | Japonica |           | Os01g0915900 | OsR498G0102571400.01.T03 | NB-ARC domain-containing protein                                        |
| augustus_masked-1-processed-gene-476.61-mRNA-1 | Japonica | NA       |           | Os01g0916000 | OsR498G0102571600.01.T02 | Putative clathrin assembly protein                                      |
| augustus_masked-1-processed-gene-476.62-mRNA-1 | Japonica | Indica   |           | Os01g0916100 | OsR498G0102571800.01.T01 | Loricrin                                                                |
| augustus_masked-1-processed-gene-477.46-mRNA-1 | Japonica | NA       |           | Os01g0917900 | OsR498G0102578800.01.T01 | E3 ubiquitin-protein ligase LUL4                                        |
| augustus_masked-1-processed-gene-478.7-mRNA-1  | Japonica | NA       |           |              | OsR498G0917172900.01.T01 | DUF834 domain-containing protein                                        |
| augustus_masked-1-processed-gene-479.12-mRNA-1 | Japonica | NA       |           |              | OsR498G0204046800.01.T01 | Circumsporozoite protein-like                                           |
| augustus_masked-1-processed-gene-480.13-mRNA-1 | Japonica | NA       |           | Os01g0922100 | OsR498G0102598800.01.T01 | vitellogenin-2                                                          |
| augustus_masked-1-processed-gene-482.15-mRNA-1 | Japonica | NA       |           | Os01g0924966 | OsR498G0102616400.01.T01 | Auxin-responsive protein SAUR71                                         |
| augustus_masked-1-processed-gene-485.70-mRNA-1 | Japonica | NA       |           | Os10g0531750 | OsR498G0408675500.01.T01 | Retrotransposon protein, putative, Ty3-gypsy sub-class                  |
| augustus_masked-1-processed-gene-487.45-mRNA-1 | Japonica | NA       |           | Os01g0934100 | OsR498G0102649000.01.T02 | C2 calcium-dependent membrane targeting                                 |
| augustus_masked-1-processed-gene-487.62-mRNA-1 | Japonica | Indica   |           | Os01g0935200 | OsR498G0102652200.01.T01 | CCAAT-binding transcription factor A                                    |

|                                                 |          |          |               |              |                          |                                                            |
|-------------------------------------------------|----------|----------|---------------|--------------|--------------------------|------------------------------------------------------------|
| augustus_masked-1-processed-gene-488.16-mRNA-1  | Japonica | Japonica |               | Os01g0936900 | OsR498G0102660600.01.T01 | Xylanase inhibitor TAXI-IV                                 |
| augustus_masked-1-processed-gene-488.17-mRNA-1  | Japonica | Indica   |               | Os01g0936900 | OsR498G0102660200.01.T01 | Peptidase A1 domain-containing protein (Fragment)          |
| augustus_masked-1-processed-gene-488.18-mRNA-1  | Japonica | Indica   |               | Os01g0936900 | OsR498G0102660600.01.T01 | Putative xylanase inhibitor                                |
| augustus_masked-1-processed-gene-488.20-mRNA-1  | Japonica | Japonica |               | Os01g0937000 | OsR498G0102660800.01.T01 | Xylanase inhibitor TAXI-IV                                 |
| augustus_masked-1-processed-gene-488.22-mRNA-1  | Japonica | NA       |               | Os01g0937100 | OsR498G0102661800.01.T01 | Xylanase inhibitor TAXI-IV                                 |
| augustus_masked-1-processed-gene-488.23-mRNA-1  | Japonica | Japonica | CC-NBS-TM     | Os01g0937300 | OsR498G0102662000.01.T03 | Disease resistance protein RGA2                            |
| augustus_masked-1-processed-gene-489.31-mRNA-1  | Japonica | NA       |               | Os01g0938400 | OsR498G0102666600.01.T01 | VWFA domain-containing protein                             |
| augustus_masked-1-processed-gene-490.8-mRNA-1   | Japonica | NA       |               | Os01g0940100 | OsR498G0102672200.01.T02 | Phosphotransferase                                         |
| augustus_masked-1-processed-gene-493.39-mRNA-1  | Japonica | NA       |               | Os01g0946550 |                          | NAC domain-containing protein                              |
| augustus_masked-1-processed-gene-494.27-mRNA-1  | Japonica | NA       |               | Os01g0948500 | OsR498G0102694000.01.T01 | U-box domain-containing protein 43                         |
| augustus_masked-1-processed-gene-496.71-mRNA-1  | Japonica | NA       |               |              |                          | BTB/POZ domain and ankyrin repeat-containing protein NH5.1 |
| augustus_masked-1-processed-gene-498.14-mRNA-1  | Japonica | NA       |               | Os01g0954900 | OsR498G0102720400.01.T01 | Nucleoid DNA-binding-like protein                          |
| augustus_masked-1-processed-gene-498.16-mRNA-1  | Japonica | NA       |               | Os01g0955100 | OsR498G0102721000.01.T01 | Probable calcium-binding protein CML31                     |
| augustus_masked-1-processed-gene-498.17-mRNA-1  | Japonica | Indica   |               | Os01g0955100 | OsR498G0102721800.01.T01 | Putative calcium-binding protein CML23                     |
| augustus_masked-1-processed-gene-5.23-mRNA-1    | Japonica | NA       |               |              | OsR498G0100073600.01.T01 |                                                            |
| augustus_masked-1-processed-gene-503.71-mRNA-1  | Japonica | NA       |               | Os01g0965800 |                          |                                                            |
| augustus_masked-1-processed-gene-503.73-mRNA-1  | Japonica | NA       |               |              | OsR498G0102756200.01.T05 | Oxoprolinase 1                                             |
| augustus_masked-1-processed-gene-506.35-mRNA-1  | Japonica | NA       |               | Os01g0971800 | OsR498G0102775000.01.T01 | PHYTOCLOCK 1                                               |
| augustus_masked-1-processed-gene-508.23-mRNA-1  | Japonica | NA       |               | Os01g0976200 | OsR498G0102788800.01.T01 | Glutelin type-A 1                                          |
| augustus_masked-1-processed-gene-509.35-mRNA-1  | Japonica | NA       |               | Os01g0977300 |                          | Transcription factor MYB44                                 |
| augustus_masked-1-processed-gene-52.19-mRNA-1   | Japonica | NA       |               | Os01g0196500 | OsR498G0100339800.01.T01 |                                                            |
| augustus_masked-1-processed-gene-52.2-mRNA-1    | Japonica | NA       |               |              | OsR498G0100335400.01.T01 | Polyamine oxidase 5                                        |
| augustus_masked-1-processed-gene-53.47-mRNA-1   | Japonica | NA       |               | Os01g0197500 | OsR498G0100343800.01.T01 | Pentatricopeptide repeat-containing protein (Fragment)     |
| augustus_masked-1-processed-gene-55.41-mRNA-1   | Japonica | NA       |               |              | OsR498G0100359200.01.T01 | VQ motif-containing protein 4                              |
| augustus_masked-1-processed-gene-56.27-mRNA-1   | Japonica | NA       |               |              | OsR498G0204046800.01.T01 | Epstein-Barr virus EBNA-1-like                             |
| augustus_masked-1-processed-gene-57.34-mRNA-1   | Japonica | NA       |               | Os01g0203300 | OsR498G0100367600.01.T05 | Glycosyltransferase                                        |
| augustus_masked-1-processed-gene-57.38-mRNA-1   | Japonica | NA       |               | Os01g0203800 | OsR498G0100369400.01.T02 | DUF641 domain-containing protein (Fragment)                |
| augustus_masked-1-processed-gene-60.23-mRNA-1   | Japonica | NA       |               | Os01g0209500 | OsR498G0100387600.01.T03 | RRM domain-containing protein                              |
| augustus_masked-1-processed-gene-60.38-mRNA-1   | Japonica | NA       |               | Os02g0212975 | OsR498G0305421900.01.T01 | Kinesin heavy chain-like                                   |
| augustus_masked-1-processed-gene-62.30-mRNA-1   | Japonica | NA       |               |              | OsR498G0100075100.01.T01 | Epstein-Barr virus EBNA-1-like                             |
| augustus_masked-1-processed-gene-62.34-mRNA-1   | Japonica | NA       |               | Os01g0213400 |                          | RING-H2 finger protein ATL2L                               |
| augustus_masked-1-processed-gene-66.53-mRNA-1   | Japonica | NA       |               |              |                          | Protein kinase domain-containing protein                   |
| augustus_masked-1-processed-gene-68.24-mRNA-1   | Japonica | Indica   | Kinase-TM     | Os01g0223700 | OsR498G0100448000.01.T02 | Non-specific serine/threonine protein kinase (Fragment)    |
| augustus_masked-1-processed-gene-68.25-mRNA-1   | Japonica | Japonica | Kinase-TM     | Os01g0224000 | OsR498G0100448100.01.T01 | Non-specific serine/threonine protein kinase (Fragment)    |
| augustus_masked-1-processed-gene-7.32-mRNA-1    | Japonica | NA       |               | Os01g0111700 | OsR498G0100037600.01.T01 |                                                            |
| augustus_masked-1-processed-gene-70.37-mRNA-1   | Japonica | NA       |               | Os01g0226400 | OsR498G0100462600.01.T01 | AAA domain-containing protein                              |
| augustus_masked-1-processed-gene-72.63-mRNA-1   | Japonica | Indica   |               | Os01g0229800 | OsR498G0100476800.01.T01 | Bark storage protein A                                     |
| augustus_masked-1-processed-gene-75.31-mRNA-1   | Japonica | Indica   |               | Os01g0235400 | OsR498G0100494600.01.T01 | Importin-beta                                              |
| augustus_masked-1-processed-gene-79.58-mRNA-1   | Japonica | NA       |               |              | OsR498G0100526000.01.T01 | Transcription factor bHLH148                               |
| augustus_masked-1-processed-gene-85.2-mRNA-1    | Japonica | Indica   |               | Os01g0254300 | OsR498G0100568000.01.T01 | Pectinesterase                                             |
| augustus_masked-1-processed-gene-97.17-mRNA-1   | Japonica | Indica   |               | Os01g0276400 | OsR498G0100655000.01.T01 | Presenilin                                                 |
| augustus_masked-1-processed-gene-98.24-mRNA-1   | Japonica | NA       |               | Os01g0278000 | OsR498G0100660800.01.T01 | Calmodulin-binding protein 25                              |
| augustus_masked-1-processed-gene-99.5-mRNA-1    | Japonica | NA       |               |              | OsR498G0100663000.01.T02 | Importin N-terminal domain-containing protein              |
| augustus_masked-10-processed-gene-106.46-mRNA-1 | Japonica | NA       |               |              | OsR498G1018770200.01.T01 |                                                            |
| augustus_masked-10-processed-gene-107.8-mRNA-1  | Japonica | Japonica |               | Os10g0434200 | OsR498G1018774700.01.T01 | BTB/POZ domain containing protein                          |
| augustus_masked-10-processed-gene-116.11-mRNA-1 | Japonica | NA       |               | Os04g0166900 |                          | F-box domain-containing protein (Fragment)                 |
| augustus_masked-10-processed-gene-117.32-mRNA-1 | Japonica | NA       |               | Os04g0163800 | OsR498G0407600700.01.T01 | Disease resistance protein                                 |
| augustus_masked-10-processed-gene-13.17-mRNA-1  | Japonica | NA       | Kinase-LRR-TM | Os10g0114400 |                          | Mitogen-activated protein kinase kinase kinase             |
| augustus_masked-10-processed-gene-13.18-mRNA-1  | Japonica | NA       |               | Os10g0114500 | OsR498G1018044000.01.T01 | Barley B recombinant-like protein A                        |
| augustus_masked-10-processed-gene-13.19-mRNA-1  | Japonica | NA       |               | Os10g0114500 | OsR498G1018044000.01.T01 | Barley B recombinant-like protein A                        |
| augustus_masked-10-processed-gene-139.35-mRNA-1 | Japonica | NA       |               | Os04g0120300 | OsR498G0407492700.01.T01 | subtilisin-like protease SDD1                              |
| augustus_masked-10-processed-gene-14.23-mRNA-1  | Japonica | Japonica |               | Os10g0115500 | OsR498G1018044000.01.T01 | Barley B recombinant-like protein C                        |
| augustus_masked-10-processed-gene-144.26-mRNA-1 | Japonica | NA       | CC-NBS-TM     |              |                          | NBS-LRR resistant protein (Fragment)                       |
| augustus_masked-10-processed-gene-146.3-mRNA-1  | Japonica | NA       |               |              | OsR498G0204768400.01.T01 | Epstein-Barr virus EBNA-1-like                             |
| augustus_masked-10-processed-gene-155.29-mRNA-1 | Japonica | NA       |               | Os10g0452300 | OsR498G1018828200.01.T01 |                                                            |
| augustus_masked-10-processed-gene-155.30-mRNA-1 | Japonica | NA       |               | Os10g0452201 | OsR498G1018828400.01.T01 |                                                            |
| augustus_masked-10-processed-gene-156.31-mRNA-1 | Japonica | NA       |               | Os10g0453900 | OsR498G1018832400.01.T01 | Glycine-rich cell wall structural protein 2                |
| augustus_masked-10-processed-gene-156.35-mRNA-1 | Japonica | NA       |               | Os10g0454500 | OsR498G1018834800.01.T01 | Root cap-specific glycine-rich protein                     |
| augustus_masked-10-processed-gene-156.5-mRNA-1  | Japonica | NA       |               | Os10g0452700 | OsR498G1018829600.01.T01 | Glycine-rich cell wall structural protein 2 (Fragment)     |
| augustus_masked-10-processed-gene-157.36-mRNA-1 | Japonica | Japonica |               | Os10g0455000 | OsR498G1018835400.01.T01 | Glycine-rich cell wall structural protein 2                |
| augustus_masked-10-processed-gene-157.37-mRNA-1 | Japonica | Indica   |               | Os10g0455000 | OsR498G1018836000.01.T01 | Glycine-rich cell wall structural protein 2-like           |

|                                                 |          |          |           |              |                          |                                                                  |
|-------------------------------------------------|----------|----------|-----------|--------------|--------------------------|------------------------------------------------------------------|
| augustus_masked-10-processed-gene-157.38-mRNA-1 | Japonica | NA       |           | Os10g0455100 | OsR498G1018836200.01.T01 | Glycine-rich cell wall structural protein 2                      |
| augustus_masked-10-processed-gene-167.49-mRNA-1 | Japonica | NA       |           | Os10g0474000 |                          |                                                                  |
| augustus_masked-10-processed-gene-168.21-mRNA-1 | Japonica | Indica   |           | Os10g0474966 | OsR498G1018896800.01.T01 | Long-chain-alcohol oxidase                                       |
| augustus_masked-10-processed-gene-168.25-mRNA-1 | Japonica | NA       |           | Os10g0476200 |                          |                                                                  |
| augustus_masked-10-processed-gene-169.20-mRNA-1 | Japonica | NA       |           | Os10g0476900 | OsR498G1018901200.01.T01 | Pentatricopeptide, putative, expressed                           |
| augustus_masked-10-processed-gene-169.21-mRNA-1 | Japonica | Indica   |           | Os10g0477200 | OsR498G1018901800.01.T01 | Pentatricopeptide repeat-containing protein mitochondrial        |
| augustus_masked-10-processed-gene-170.36-mRNA-1 | Japonica | NA       |           | Os10g0478400 | OsR498G1018908200.01.T01 |                                                                  |
| augustus_masked-10-processed-gene-173.8-mRNA-1  | Japonica | NA       |           | Os10g0481300 | OsR498G1018923400.01.T01 | GST C-terminal domain-containing protein                         |
| augustus_masked-10-processed-gene-174.59-mRNA-1 | Japonica | NA       |           | Os10g0484300 | OsR498G1018936200.01.T02 | Pentatricopeptide repeat-containing protein                      |
| augustus_masked-10-processed-gene-176.10-mRNA-1 | Japonica | Indica   |           | Os10g0487400 | OsR498G1018946600.01.T01 | RING-type E3 ubiquitin transferase                               |
| augustus_masked-10-processed-gene-177.35-mRNA-1 | Japonica | NA       |           |              |                          | Putative ripening-related protein 7                              |
| augustus_masked-10-processed-gene-177.58-mRNA-1 | Japonica | Indica   |           | Os10g0489800 | OsR498G1018955800.01.T02 | DUF1308 domain-containing protein (Fragment)                     |
| augustus_masked-10-processed-gene-178.7-mRNA-1  | Japonica | Indica   |           | Os10g0490900 | OsR498G1018957600.01.T01 | Basic secretory protease                                         |
| augustus_masked-10-processed-gene-179.66-mRNA-1 | Japonica | NA       |           | Os10g0494100 | OsR498G1018971000.01.T01 |                                                                  |
| augustus_masked-10-processed-gene-18.40-mRNA-1  | Japonica | Japonica | CC-NBS    | Os10g0124300 | OsR498G1018071200.01.T02 | Disease resistance protein RPM1                                  |
| augustus_masked-10-processed-gene-180.3-mRNA-1  | Japonica | NA       |           | Os10g0495200 | OsR498G1018978200.01.T01 | Rf1 protein, mitochondrial, putative, expressed                  |
| augustus_masked-10-processed-gene-182.53-mRNA-1 | Japonica | NA       |           |              | OsR498G1018987600.01.T02 | PsbB mRNA maturation factor Mbb1, chloroplastic                  |
| augustus_masked-10-processed-gene-185.4-mRNA-1  | Japonica | Japonica |           | Os10g0505500 | OsR498G1019007500.01.T01 | AAI domain-containing protein (Fragment)                         |
| augustus_masked-10-processed-gene-187.32-mRNA-1 | Japonica | NA       |           | Os10g0508700 | OsR498G1019016200.01.T01 | PMEI domain-containing protein                                   |
| augustus_masked-10-processed-gene-187.33-mRNA-1 | Japonica | Japonica |           | Os10g0508900 | OsR498G1019017000.01.T01 |                                                                  |
| augustus_masked-10-processed-gene-187.59-mRNA-1 | Japonica | NA       |           | Os10g0510300 | OsR498G1019022800.01.T01 | PORR domain-containing protein (Fragment)                        |
| augustus_masked-10-processed-gene-188.32-mRNA-1 | Japonica | NA       |           | Os10g0510500 | OsR498G1019024000.01.T01 | Auxin-responsive protein SAUR32                                  |
| augustus_masked-10-processed-gene-189.16-mRNA-1 | Japonica | NA       |           | Os10g0512500 | OsR498G1019030200.01.T01 | RNA-binding                                                      |
| augustus_masked-10-processed-gene-190.20-mRNA-1 | Japonica | NA       |           | Os10g0514600 | OsR498G1019034400.01.T01 | T-complex protein 1 subunit delta                                |
| augustus_masked-10-processed-gene-192.10-mRNA-1 | Japonica | NA       |           |              | OsR498G0511427100.01.T01 | Epstein-Barr virus EBNA-1-like                                   |
| augustus_masked-10-processed-gene-195.52-mRNA-1 | Japonica | NA       |           | Os10g0523700 | OsR498G1019068000.01.T01 | Arogenate dehydratase                                            |
| augustus_masked-10-processed-gene-195.55-mRNA-1 | Japonica | NA       |           | Os10g0524600 | OsR498G1019071400.01.T01 | Subtilisin-like serine protease                                  |
| augustus_masked-10-processed-gene-21.43-mRNA-1  | Japonica | NA       | NBS-TM    |              |                          | Powdery mildew resistance protein PM17                           |
| augustus_masked-10-processed-gene-23.22-mRNA-1  | Japonica | NA       |           | Os10g0133100 |                          | F-box domain containing protein, expressed                       |
| augustus_masked-10-processed-gene-24.9-mRNA-1   | Japonica | NA       |           |              | OsR498G1018103600.01.T01 |                                                                  |
| augustus_masked-10-processed-gene-25.18-mRNA-1  | Japonica | Indica   |           | Os10g0134500 | OsR498G1018108800.01.T01 | F-box domain-containing protein                                  |
| augustus_masked-10-processed-gene-25.20-mRNA-1  | Japonica | NA       |           | Os10g0136400 | OsR498G1018109000.01.T02 | Cysteine-rich receptor-like protein kinase 10                    |
| augustus_masked-10-processed-gene-26.16-mRNA-1  | Japonica | NA       |           | Os10g0136900 | OsR498G1018109800.01.T01 | F-box domain containing protein, expressed                       |
| augustus_masked-10-processed-gene-26.17-mRNA-1  | Japonica | NA       |           | Os10g0137000 | OsR498G1018110000.01.T01 | F-box domain-containing protein (Fragment)                       |
| augustus_masked-10-processed-gene-30.28-mRNA-1  | Japonica | NA       |           | Os10g0145100 | OsR498G1018134000.01.T02 | F-box domain containing protein, expressed                       |
| augustus_masked-10-processed-gene-36.6-mRNA-1   | Japonica | Indica   | Kinase-TM | Os10g0152000 | OsR498G1018157400.01.T01 | Wall-associated receptor kinase 2                                |
| augustus_masked-10-processed-gene-45.15-mRNA-1  | Japonica | Indica   | LRR-TM    | Os02g0156400 | OsR498G1018221800.01.T01 | Putative Phytosulfokine receptor                                 |
| augustus_masked-10-processed-gene-46.19-mRNA-1  | Japonica | Indica   |           | Os10g0163201 | OsR498G1018230000.01.T01 | Retrotransposon protein, putative, Ty3-gypsy subclass            |
| augustus_masked-10-processed-gene-58.25-mRNA-1  | Japonica | NA       |           |              | OsR498G0409006400.01.T04 |                                                                  |
| augustus_masked-10-processed-gene-59.23-mRNA-1  | Japonica | NA       |           |              | OsR498G1018292000.01.T01 | F-box domain-containing protein (Fragment)                       |
| augustus_masked-10-processed-gene-63.36-mRNA-1  | Japonica | NA       |           | Os10g0188800 | OsR498G1018312800.01.T01 | Retrotransposon protein, putative, Ty3-gypsy subclass, expressed |
| augustus_masked-10-processed-gene-69.21-mRNA-1  | Japonica | NA       |           | Os08g0381000 | OsR498G0917373300.01.T01 | Retrotransposon protein, putative, Ty3-gypsy subclass            |
| augustus_masked-10-processed-gene-73.21-mRNA-1  | Japonica | NA       |           | Os12g0518100 |                          |                                                                  |
| augustus_masked-10-processed-gene-73.5-mRNA-1   | Japonica | NA       |           |              | OsR498G1018341400.01.T01 | F-box domain-containing protein (Fragment)                       |
| augustus_masked-10-processed-gene-75.28-mRNA-1  | Japonica | NA       |           | Os10g0200700 | OsR498G1018354200.01.T01 | OVATE domain-containing protein                                  |
| augustus_masked-11-processed-gene-0.43-mRNA-1   | Japonica | NA       |           |              | OsR498G0511427100.01.T01 | Epstein-Barr virus EBNA-1-like                                   |
| augustus_masked-11-processed-gene-10.103-mRNA-1 | Japonica | NA       |           |              | OsR498G1119385200.01.T01 | putative RING-H2 finger protein ATL61                            |
| augustus_masked-11-processed-gene-10.82-mRNA-1  | Japonica | NA       |           | Os11g0135900 | OsR498G1119380200.01.T01 | Transporter, putative, expressed                                 |
| augustus_masked-11-processed-gene-109.23-mRNA-1 | Japonica | NA       |           |              | OsR498G0203809100.01.T01 | DUF834 domain-containing protein                                 |
| augustus_masked-11-processed-gene-11.10-mRNA-1  | Japonica | Indica   |           | Os11g0138300 | OsR498G1119390400.01.T01 | Cytochrome P450 family protein, expressed                        |
| augustus_masked-11-processed-gene-111.22-mRNA-1 | Japonica | Japonica | NBS-TM    | Os11g0429100 | OsR498G1120005800.01.T01 | NBS-LRR type resistance protein (Fragment)                       |
| augustus_masked-11-processed-gene-111.9-mRNA-1  | Japonica | NA       |           | Os11g0428500 |                          |                                                                  |
| augustus_masked-11-processed-gene-114.21-mRNA-1 | Japonica | NA       |           |              | OsR498G1120019600.01.T01 | PGG domain-containing protein                                    |
| augustus_masked-11-processed-gene-115.3-mRNA-1  | Japonica | NA       |           |              |                          |                                                                  |
| augustus_masked-11-processed-gene-119.8-mRNA-1  | Japonica | NA       |           |              | OsR498G0305447100.01.T01 |                                                                  |
| augustus_masked-11-processed-gene-12.25-mRNA-1  | Japonica | NA       |           | Os12g0137900 | OsR498G1220905400.01.T01 | Alpha-galactosidase                                              |
| augustus_masked-11-processed-gene-12.26-mRNA-1  | Japonica | Japonica |           | Os12g0137900 | OsR498G1119397800.01.T01 | Sulfotransferase                                                 |
| augustus_masked-11-processed-gene-12.28-mRNA-1  | Japonica | NA       |           |              | OsR498G1119398600.01.T01 | GRAS domain-containing protein (Fragment)                        |
| augustus_masked-11-processed-gene-12.30-mRNA-1  | Japonica | NA       |           |              | OsR498G1119399600.01.T01 | GRAS domain-containing protein (Fragment)                        |
| augustus_masked-11-processed-gene-125.1-mRNA-1  | Japonica | NA       |           | Os11g0450300 | OsR498G1120065200.01.T01 | Sulfotransferase                                                 |
| augustus_masked-11-processed-gene-128.18-mRNA-1 | Japonica | NA       |           | Os11g0456000 | OsR498G1120082000.01.T03 | Rapid alkalization factor 1                                      |

|                                                 |          |          |            |              |                          |                                                                                 |
|-------------------------------------------------|----------|----------|------------|--------------|--------------------------|---------------------------------------------------------------------------------|
| augustus_masked-11-processed-gene-129.4-mRNA-1  | Japonica | NA       |            | Os11g0457300 | OsR498G1120085200.01.T01 | Glycosyltransferase                                                             |
| augustus_masked-11-processed-gene-14.10-mRNA-1  | Japonica | NA       |            | Os11g0145200 | OsR498G1119406400.01.T01 | Glycosyltransferase                                                             |
| augustus_masked-11-processed-gene-14.9-mRNA-1   | Japonica | NA       |            | Os11g0145100 | OsR498G1119406200.01.T03 | tRNA-uridine aminocarboxypropyltransferase                                      |
| augustus_masked-11-processed-gene-149.6-mRNA-1  | Japonica | NA       |            |              |                          | Adenosinetriphosphatase                                                         |
| augustus_masked-11-processed-gene-151.6-mRNA-1  | Japonica | Japonica |            | Os11g0495950 | OsR498G0612724200.01.T01 | Inactive tetrahydrocannabinolic acid synthase                                   |
| augustus_masked-11-processed-gene-153.19-mRNA-1 | Japonica | NA       |            | Os11g0500100 |                          | HAT dimerisation domain-containing protein-like                                 |
| augustus_masked-11-processed-gene-153.30-mRNA-1 | Japonica | NA       |            | Os11g0501000 |                          |                                                                                 |
| augustus_masked-11-processed-gene-155.25-mRNA-1 | Japonica | NA       |            |              |                          | Transposon protein, putative, Pong sub-class                                    |
| augustus_masked-11-processed-gene-156.22-mRNA-1 | Japonica | NA       |            |              | OsR498G0407665800.01.T01 | Retrotransposon protein, putative, unclassified                                 |
| augustus_masked-11-processed-gene-156.4-mRNA-1  | Japonica | NA       |            |              | OsR498G1120205800.01.T01 | GRAS transcription factor                                                       |
| augustus_masked-11-processed-gene-159.51-mRNA-1 | Japonica | NA       |            | Os11g0514100 | OsR498G1120215400.01.T01 | ATP/DNA-binding protein (Fragment)                                              |
| augustus_masked-11-processed-gene-159.56-mRNA-1 | Japonica | Indica   |            | Os11g0515000 | OsR498G1120218800.01.T01 | Armadillo/beta-catenin-like repeat family protein, expressed                    |
| augustus_masked-11-processed-gene-167.45-mRNA-1 | Japonica | Indica   |            | Os07g0501100 | OsR498G1120265000.01.T01 | Chalcone and stilbene synthases, N-terminal domain containing protein           |
| augustus_masked-11-processed-gene-169.20-mRNA-1 | Japonica | NA       |            | Os11g0533100 | OsR498G1120278000.01.T02 | CarD-like transcriptional regulator family protein, expressed                   |
| augustus_masked-11-processed-gene-169.21-mRNA-1 | Japonica | NA       |            | Os11g0533400 | OsR498G1120278400.01.T01 | NADH-ubiquinone reductase complex 1 MLRQ subunit                                |
| augustus_masked-11-processed-gene-17.31-mRNA-1  | Japonica | Indica   |            | Os10g0326400 | OsR498G1119430200.01.T01 | F-box domain containing protein, expressed                                      |
| augustus_masked-11-processed-gene-17.6-mRNA-1   | Japonica | NA       |            | Os11g0151300 | OsR498G1119422800.01.T02 | KOW domain-containing protein                                                   |
| augustus_masked-11-processed-gene-17.7-mRNA-1   | Japonica | NA       |            | Os11g0151400 | OsR498G1119425200.01.T01 | Cytochrome P450 family protein, expressed                                       |
| augustus_masked-11-processed-gene-171.47-mRNA-1 | Japonica | Japonica |            | Os11g0537800 | OsR498G0407604900.01.T01 |                                                                                 |
| augustus_masked-11-processed-gene-175.4-mRNA-1  | Japonica | NA       |            | Os11g0543900 |                          |                                                                                 |
| augustus_masked-11-processed-gene-175.7-mRNA-1  | Japonica | NA       |            | Os11g0544300 | OsR498G1120313000.01.T03 | PORR domain-containing protein (Fragment)                                       |
| augustus_masked-11-processed-gene-176.62-mRNA-1 | Japonica | NA       |            | Os11g0546500 | OsR498G1120322800.01.T01 | Glycosyltransferase 6                                                           |
| augustus_masked-11-processed-gene-177.15-mRNA-1 | Japonica | NA       |            | Os11g0547000 | OsR498G1120324400.01.T01 | Adagio-like protein 3                                                           |
| augustus_masked-11-processed-gene-18.46-mRNA-1  | Japonica | NA       |            | Os11g0152900 | OsR498G1119432200.01.T01 |                                                                                 |
| augustus_masked-11-processed-gene-18.79-mRNA-1  | Japonica | NA       |            | Os11g0155100 |                          | F-box domain containing protein, expressed                                      |
| augustus_masked-11-processed-gene-180.64-mRNA-1 | Japonica | Japonica |            | Os11g0552500 | OsR498G1120340000.01.T01 | Agenet-like domain-containing protein                                           |
| augustus_masked-11-processed-gene-181.6-mRNA-1  | Japonica | Indica   |            | Os10g0445600 | OsR498G1120341200.01.T01 | Rubisco accumulation factor 1, chloroplastic-like                               |
| augustus_masked-11-processed-gene-181.7-mRNA-1  | Japonica | NA       | Kinase-TM  | Os11g0553500 | OsR498G1120341600.01.T01 | Wall-associated receptor kinase 3                                               |
| augustus_masked-11-processed-gene-182.29-mRNA-1 | Japonica | NA       | Kinase-TM  | Os11g0556400 |                          | Wall-associated receptor kinase 1                                               |
| augustus_masked-11-processed-gene-182.53-mRNA-1 | Japonica | NA       |            | Os11g0557300 | OsR498G1120348600.01.T01 | BSD domain containing protein, expressed                                        |
| augustus_masked-11-processed-gene-182.55-mRNA-1 | Japonica | NA       |            | Os11g0557300 | OsR498G1120348600.01.T02 | BSD domain containing protein, expressed                                        |
| augustus_masked-11-processed-gene-182.58-mRNA-1 | Japonica | Japonica | LRR-TM     | Os11g0558400 | OsR498G1120351600.01.T01 | Leucine Rich Repeat family protein, expressed                                   |
| augustus_masked-11-processed-gene-183.18-mRNA-1 | Japonica | NA       | LRR-TM     |              |                          | Leucine-rich repeat receptor protein kinase MSL1                                |
| augustus_masked-11-processed-gene-183.19-mRNA-1 | Japonica | NA       | LRR-NBS-TM | Os11g0560000 | OsR498G1120357400.01.T01 | Disease resistance protein RPM1                                                 |
| augustus_masked-11-processed-gene-183.4-mRNA-1  | Japonica | NA       | LRR-TM     | Os11g0558900 | OsR498G1120352700.01.T01 | Leucine Rich Repeat family protein, expressed                                   |
| augustus_masked-11-processed-gene-185.13-mRNA-1 | Japonica | NA       |            | Os08g0564800 | OsR498G0816627600.01.T04 |                                                                                 |
| augustus_masked-11-processed-gene-19.28-mRNA-1  | Japonica | Japonica |            | Os11g0155900 | OsR498G0611661000.01.T01 | Histone domain-containing protein (Fragment)                                    |
| augustus_masked-11-processed-gene-192.34-mRNA-1 | Japonica | Japonica |            | Os11g0576700 | OsR498G0815097600.01.T01 |                                                                                 |
| augustus_masked-11-processed-gene-193.38-mRNA-1 | Japonica | Indica   |            | Os11g0578500 | OsR498G1120404900.01.T02 | J domain-containing protein                                                     |
| augustus_masked-11-processed-gene-197.22-mRNA-1 | Japonica | NA       |            | Os06g0272800 | OsR498G0612082400.01.T01 | Leaf senescence protein-like                                                    |
| augustus_masked-11-processed-gene-197.24-mRNA-1 | Japonica | NA       |            | Os11g0587100 | OsR498G1120421800.01.T05 | Pentatricopeptide repeat-containing protein                                     |
| augustus_masked-11-processed-gene-198.19-mRNA-1 | Japonica | NA       |            |              | OsR498G1120424600.01.T01 | Late embryogenesis abundant (LEA) hydroxyproline-rich glycoprotein family       |
| augustus_masked-11-processed-gene-2.45-mRNA-1   | Japonica | Japonica |            | Os11g0120000 | OsR498G0612633600.01.T01 | Harpin-induced protein 1 containing protein, expressed                          |
| augustus_masked-11-processed-gene-2.47-mRNA-1   | Japonica | NA       |            | Os12g0120100 | OsR498G1119335000.01.T01 | Eukaryotic translation initiation factor 2B family protein, putative, expressed |
| augustus_masked-11-processed-gene-2.65-mRNA-1   | Japonica | NA       | Kinase     | Os11g0121800 |                          | Serine/threonine-protein kinase At5g01020                                       |
| augustus_masked-11-processed-gene-20.42-mRNA-1  | Japonica | NA       |            | Os11g0157300 | OsR498G1119449800.01.T01 | Harpin-induced protein 1 containing protein, expressed                          |
| augustus_masked-11-processed-gene-200.69-mRNA-1 | Japonica | NA       |            | Os11g0592650 |                          |                                                                                 |
| augustus_masked-11-processed-gene-201.35-mRNA-1 | Japonica | NA       |            | Os11g0592900 | OsR498G1120437600.01.T01 | Thioredoxin                                                                     |
| augustus_masked-11-processed-gene-201.62-mRNA-1 | Japonica | NA       |            | Os11g0593600 |                          | DUF295 domain-containing protein (Fragment)                                     |
| augustus_masked-11-processed-gene-201.63-mRNA-1 | Japonica | NA       |            | Os11g0593700 |                          | DUF295 domain-containing protein (Fragment)                                     |
| augustus_masked-11-processed-gene-201.65-mRNA-1 | Japonica | NA       |            |              | OsR498G1120440400.01.T03 | DUF629 domain-containing protein                                                |
| augustus_masked-11-processed-gene-201.67-mRNA-1 | Japonica | NA       |            | Os11g0594400 | OsR498G1120441400.01.T01 | DUF295 domain-containing protein                                                |
| augustus_masked-11-processed-gene-203.21-mRNA-1 | Japonica | NA       | CC-NBS-TM  | Os11g0598300 | OsR498G1120448400.01.T01 | Leucine Rich Repeat family protein, expressed                                   |
| augustus_masked-11-processed-gene-204.54-mRNA-1 | Japonica | NA       |            | Os11g0599200 | OsR498G1120454800.01.T01 | Glycosyltransferase                                                             |
| augustus_masked-11-processed-gene-206.12-mRNA-1 | Japonica | NA       |            | Os11g0600500 | OsR498G1120466600.01.T01 | Putative calcium-binding protein CML45                                          |
| augustus_masked-11-processed-gene-207.40-mRNA-1 | Japonica | NA       |            | Os11g0602800 | OsR498G1120475600.01.T01 | F-boxkelch-repeat protein skip11                                                |
| augustus_masked-11-processed-gene-207.43-mRNA-1 | Japonica | NA       |            |              | OsR498G1120478400.01.T01 | RNA recognition motif domain containing protein                                 |
| augustus_masked-11-processed-gene-208.22-mRNA-1 | Japonica | Japonica |            | Os11g0604500 | OsR498G1019153500.01.T01 |                                                                                 |
| augustus_masked-11-processed-gene-21.25-mRNA-1  | Japonica | NA       |            | Os11g0157900 |                          |                                                                                 |
| augustus_masked-11-processed-gene-211.2-mRNA-1  | Japonica | NA       | LRR        | Os11g0609700 |                          | Disease resistance protein RPM1                                                 |
| augustus_masked-11-processed-gene-211.3-mRNA-1  | Japonica | NA       | CC-NBS-TM  | Os11g0609700 | OsR498G1120489600.01.T01 | Disease resistance protein RPM1                                                 |

|                                                  |          |          |               |              |                          |                                                                 |
|--------------------------------------------------|----------|----------|---------------|--------------|--------------------------|-----------------------------------------------------------------|
| augustus_masked-11-processed-gene-216.22-mRNA-1  | Japonica | NA       |               |              | OsR498G1120521200.01.T01 | USP domain-containing protein                                   |
| augustus_masked-11-processed-gene-217.29-mRNA-1  | Japonica | NA       |               | Os11g0621000 | OsR498G1120525600.01.T03 | C globular stage isoform 1                                      |
| augustus_masked-11-processed-gene-218.4-mRNA-1   | Japonica | NA       |               | Os11g0622600 | OsR498G1120530800.01.T01 | BTB/POZ domain containing protein, expressed                    |
| augustus_masked-11-processed-gene-219.12-mRNA-1  | Japonica | NA       | CC-LRR-NBS-TM | Os11g0623800 | OsR498G1120539400.01.T03 | Putative nucleotide-binding leucine-rich-repeat protein 1       |
| augustus_masked-11-processed-gene-219.32-mRNA-1  | Japonica | NA       | Kinase-LRR-TM | Os11g0624600 | OsR498G1120543200.01.T03 | GPCR kinase                                                     |
| augustus_masked-11-processed-gene-227.3-mRNA-1   | Japonica | NA       |               | Os11g0637200 | OsR498G1120603000.01.T01 | Polyol transporter 5                                            |
| augustus_masked-11-processed-gene-228.26-mRNA-1  | Japonica | NA       | LRR-NBS-TM    | Os11g0639600 | OsR498G1120610200.01.T02 | NB-ARC domain containing protein, expressed                     |
| augustus_masked-11-processed-gene-228.29-mRNA-1  | Japonica | NA       | CC-LRR-NBS-TM | Os11g0640000 | OsR498G1120611600.01.T01 | Leucine Rich Repeat family protein, expressed                   |
| augustus_masked-11-processed-gene-23.33-mRNA-1   | Japonica | NA       |               | Os11g0162900 |                          |                                                                 |
| augustus_masked-11-processed-gene-23.6-mRNA-1    | Japonica | Japonica |               | Os11g0161033 | OsR498G0611509300.01.T02 | Ozone-responsive stress related protein                         |
| augustus_masked-11-processed-gene-234.34-mRNA-1  | Japonica | NA       |               | Os11g0649500 | OsR498G1120645800.01.T01 |                                                                 |
| augustus_masked-11-processed-gene-236.22-mRNA-1  | Japonica | NA       | CC-NBS-TM     | Os11g0653300 |                          | NBS-LRR type resistance protein-like                            |
| augustus_masked-11-processed-gene-237.27-mRNA-1  | Japonica | NA       | CC-NBS-TM     | Os11g0654800 | OsR498G1120666400.01.T01 | Disease resistance protein RPM1                                 |
| augustus_masked-11-processed-gene-239.33-mRNA-1  | Japonica | NA       | CC-NBS-TM     |              | OsR498G1120676400.01.T02 | Putative disease resistance RPP8-like protein 2                 |
| augustus_masked-11-processed-gene-240.39-mRNA-1  | Japonica | Japonica |               | Os11g0659600 | OsR498G1120730000.01.T01 | Pectinesterase                                                  |
| augustus_masked-11-processed-gene-240.41-mRNA-1  | Japonica | NA       |               | Os11g0659700 |                          | Pectinesterase                                                  |
| augustus_masked-11-processed-gene-244.4-mRNA-1   | Japonica | NA       | CC-Kinase-TM  | Os11g0664000 | OsR498G1120691000.01.T01 | L-type lectin-domain containing receptor kinase IX.1            |
| augustus_masked-11-processed-gene-245.11-mRNA-1  | Japonica | NA       | CC-NBS        | Os11g0668000 | OsR498G1120693800.01.T01 | Putative NBS-LRR class RGA                                      |
| augustus_masked-11-processed-gene-245.12-mRNA-1  | Japonica | NA       |               | Os11g0668000 | OsR498G1120693800.01.T01 | Putative NBS-LRR class RGA                                      |
| augustus_masked-11-processed-gene-245.30-mRNA-1  | Japonica | NA       |               | Os07g0543700 | OsR498G0408675500.01.T01 | Retrotransposon protein, putative, Ty3-gypsy sub-class          |
| augustus_masked-11-processed-gene-247.40-mRNA-1  | Japonica | NA       |               | Os11g0673000 | OsR498G1120707000.01.T03 | Pentatricopeptide repeat                                        |
| augustus_masked-11-processed-gene-25.8-mRNA-1    | Japonica | NA       |               |              | OsR498G1119472200.01.T01 | DNA-binding factor of bZIP class                                |
| augustus_masked-11-processed-gene-25.9-mRNA-1    | Japonica | Japonica |               | Os11g0166201 | OsR498G1220787900.01.T02 | Enoyl-[acyl-carrier-protein] reductase, mitochondrial           |
| augustus_masked-11-processed-gene-252.23-mRNA-1  | Japonica | NA       |               | Os11g0683700 | OsR498G1120730000.01.T01 | Pectinesterase                                                  |
| augustus_masked-11-processed-gene-253.37-mRNA-1  | Japonica | NA       | NBS-TM        | Os11g0686900 | OsR498G1120736800.01.T01 | NBS-LRR disease resistance protein homologue-like               |
| augustus_masked-11-processed-gene-259.11-mRNA-1  | Japonica | NA       |               |              | OsR498G0511427100.01.T01 | Epstein-Barr virus EBNA-1-like                                  |
| augustus_masked-11-processed-gene-260.33-mRNA-1  | Japonica | Japonica |               | Os11g0701000 | OsR498G1120761400.01.T01 | Xylanase inhibitor protein I                                    |
| augustus_masked-11-processed-gene-261.41-mRNA-1  | Japonica | NA       |               | Os11g0701900 | OsR498G1120763800.01.T02 | Xylanase inhibitor                                              |
| augustus_masked-11-processed-gene-261.42-mRNA-1  | Japonica | NA       |               | Os11g0702100 | OsR498G1120764000.01.T01 | Xylanase inhibitor                                              |
| augustus_masked-11-processed-gene-261.43-mRNA-1  | Japonica | NA       |               | Os11g0702200 | OsR498G1120764200.01.T01 | Xylanase inhibitor protein 1                                    |
| augustus_masked-11-processed-gene-261.44-mRNA-1  | Japonica | NA       |               |              |                          | Zinc finger protein ZAT5                                        |
| augustus_masked-11-processed-gene-261.9-mRNA-1   | Japonica | Japonica |               | Os11g0701000 | OsR498G1120761400.01.T01 | Xylanase inhibitor protein I                                    |
| augustus_masked-11-processed-gene-263.100-mRNA-1 | Japonica | NA       |               | Os11g0707900 | OsR498G1120777600.01.T01 | UPF0503 protein, chloroplastic                                  |
| augustus_masked-11-processed-gene-263.91-mRNA-1  | Japonica | NA       |               | Os11g0707100 | OsR498G1120775000.01.T01 | Chloroplast ribulose biphosphate carboxylase/oxygenase activase |
| augustus_masked-11-processed-gene-263.95-mRNA-1  | Japonica | NA       |               | Os11g0707300 |                          | Putative transcriptional regulator RABBIT EARS                  |
| augustus_masked-11-processed-gene-27.55-mRNA-1   | Japonica | NA       |               | Os01g0647800 | OsR498G0101650800.01.T02 |                                                                 |
| augustus_masked-11-processed-gene-27.58-mRNA-1   | Japonica | NA       |               | Os11g0168000 | OsR498G1119478400.01.T01 | Egg cell-secreted protein 1.4                                   |
| augustus_masked-11-processed-gene-28.24-mRNA-1   | Japonica | NA       |               | Os11g0169600 |                          | Hyccin                                                          |
| augustus_masked-11-processed-gene-28.25-mRNA-1   | Japonica | NA       |               | Os11g0169700 | OsR498G1119484000.01.T03 | Aldehyde oxidase glox                                           |
| augustus_masked-11-processed-gene-29.21-mRNA-1   | Japonica | Indica   |               | Os11g0171400 | OsR498G1119486600.01.T01 | Integrator complex subunit 3 isogeny                            |
| augustus_masked-11-processed-gene-3.21-mRNA-1    | Japonica | NA       |               | Os11g0123033 | OsR498G1119343800.01.T03 | Amidase signature enzyme                                        |
| augustus_masked-11-processed-gene-32.50-mRNA-1   | Japonica | NA       |               | Os11g0175700 | OsR498G1119504600.01.T02 | TCP transcription factor                                        |
| augustus_masked-11-processed-gene-34.21-mRNA-1   | Japonica | Indica   |               | Os11g0179100 | OsR498G1119516000.01.T01 | Pterocarpan synthase 1                                          |
| augustus_masked-11-processed-gene-34.5-mRNA-1    | Japonica | NA       |               | Os11g0178800 | OsR498G1119514600.01.T02 | Dirigent protein 15                                             |
| augustus_masked-11-processed-gene-34.6-mRNA-1    | Japonica | NA       |               | Os11g0179000 | OsR498G1119515000.01.T01 | Dirigent protein (Fragment)                                     |
| augustus_masked-11-processed-gene-36.6-mRNA-1    | Japonica | Japonica |               | Os11g0182100 | OsR498G1119524400.01.T01 | keratin, type II cytoskeletal 2 epidermal                       |
| augustus_masked-11-processed-gene-37.45-mRNA-1   | Japonica | NA       |               |              | OsR498G0511427100.01.T01 | Epstein-Barr virus EBNA-1-like                                  |
| augustus_masked-11-processed-gene-40.22-mRNA-1   | Japonica | NA       |               | Os07g0433200 | OsR498G0510328900.01.T01 | Retrotransposon protein, putative, Ty1-copia subclass           |
| augustus_masked-11-processed-gene-40.23-mRNA-1   | Japonica | NA       |               | Os07g0433200 | OsR498G0510328900.01.T01 | Retrotransposon protein, putative, Ty1-copia subclass           |
| augustus_masked-11-processed-gene-45.46-mRNA-1   | Japonica | NA       |               | Os11g0264900 |                          | Peptidylprolyl isomerase                                        |
| augustus_masked-11-processed-gene-49.6-mRNA-1    | Japonica | NA       |               | Os11g0270000 | OsR498G1119787000.01.T01 |                                                                 |
| augustus_masked-11-processed-gene-52.26-mRNA-1   | Japonica | NA       |               | Os05g0269800 | OsR498G0409509300.01.T01 | Transposon protein, putative, CACTA, En/Spm sub-class           |
| augustus_masked-11-processed-gene-52.5-mRNA-1    | Japonica | NA       |               |              | OsR498G0204046800.01.T01 | Epstein-Barr virus EBNA-1-like                                  |
| augustus_masked-11-processed-gene-54.29-mRNA-1   | Japonica | Japonica |               | Os11g0256100 | OsR498G1119726400.01.T03 | Acetohydroxy-acid synthase small subunit                        |
| augustus_masked-11-processed-gene-54.33-mRNA-1   | Japonica | NA       |               |              | OsR498G1119728000.01.T01 |                                                                 |
| augustus_masked-11-processed-gene-56.8-mRNA-1    | Japonica | NA       |               | Os11g0258900 |                          |                                                                 |
| augustus_masked-11-processed-gene-57.10-mRNA-1   | Japonica | NA       | CC-LRR-NBS-TM |              | OsR498G1119693000.01.T02 | Putative nucleotide-binding leucine-rich-repeat protein 1       |
| augustus_masked-11-processed-gene-57.11-mRNA-1   | Japonica | Indica   |               | Os06g0103200 | OsR498G1119695000.01.T01 | N-hydroxycinnamoyl benzoyltransferase-like protein              |
| augustus_masked-11-processed-gene-58.3-mRNA-1    | Japonica | NA       |               | Os11g0244600 | OsR498G1119697000.01.T01 | Clathrin assembly protein                                       |
| augustus_masked-11-processed-gene-58.5-mRNA-1    | Japonica | NA       |               | Os11g0244900 |                          | FAR1 domain-containing protein                                  |
| augustus_masked-11-processed-gene-59.18-mRNA-1   | Japonica | NA       |               | Os11g0247000 | OsR498G1119707600.01.T01 |                                                                 |

|                                                 |          |          |               |              |                          |                                                                                 |
|-------------------------------------------------|----------|----------|---------------|--------------|--------------------------|---------------------------------------------------------------------------------|
| augustus_masked-11-processed-gene-59.4-mRNA-1   | Japonica | NA       |               |              | OsR498G1119701200.01.T01 | UDP-glycosyltransferase-like                                                    |
| augustus_masked-11-processed-gene-59.6-mRNA-1   | Japonica | NA       |               | Os11g0246200 | OsR498G1119702200.01.T01 | F-box/kelch-repeat protein SKIP20                                               |
| augustus_masked-11-processed-gene-6.97-mRNA-1   | Japonica | NA       |               | Os11g0127900 | OsR498G1119354800.01.T01 | Small subunit ribosomal protein S16e                                            |
| augustus_masked-11-processed-gene-60.24-mRNA-1  | Japonica | NA       |               | Os11g0247500 |                          | FtsJ domain-containing protein                                                  |
| augustus_masked-11-processed-gene-63.31-mRNA-1  | Japonica | NA       |               | Os11g0195700 | OsR498G1119554600.01.T01 | Dihydrolipoamide acetyltransferase component of pyruvate dehydrogenase          |
| augustus_masked-11-processed-gene-65.23-mRNA-1  | Japonica | NA       |               | Os11g0199600 | OsR498G1119568600.01.T01 | Zinc finger CCHC domain-containing protein 10                                   |
| augustus_masked-11-processed-gene-7.27-mRNA-1   | Japonica | NA       |               |              |                          |                                                                                 |
| augustus_masked-11-processed-gene-7.31-mRNA-1   | Japonica | NA       |               |              | OsR498G1119367200.01.T01 | Histone-lysine N-methyltransferase H3 lysine-9 specific SUVH3                   |
| augustus_masked-11-processed-gene-7.32-mRNA-1   | Japonica | NA       |               | Os11g0132100 | OsR498G1119369000.01.T01 | PMEI domain-containing protein (Fragment)                                       |
| augustus_masked-11-processed-gene-7.7-mRNA-1    | Japonica | NA       |               | Os11g0130400 | OsR498G1119364000.01.T01 | Harpin-induced protein 1 containing protein, expressed                          |
| augustus_masked-11-processed-gene-70.20-mRNA-1  | Japonica | Japonica |               | Os11g0207300 | OsR498G1119592200.01.T01 | Ribosome-recycling factor                                                       |
| augustus_masked-11-processed-gene-70.21-mRNA-1  | Japonica | NA       | NBS-TM        | Os11g0207400 |                          | NB-ARC domain-containing protein                                                |
| augustus_masked-11-processed-gene-71.36-mRNA-1  | Japonica | Indica   | Kinase-TM     | Os04g0103700 | OsR498G1119598200.01.T01 | Non-specific serine/threonine protein kinase (Fragment)                         |
| augustus_masked-11-processed-gene-73.23-mRNA-1  | Japonica | NA       |               | Os11g0210201 | OsR498G1119605600.01.T01 |                                                                                 |
| augustus_masked-11-processed-gene-74.40-mRNA-1  | Japonica | NA       | Kinase-LRR-TM |              |                          | Putative LRR receptor-like serine/threonine-protein kinase (Fragment)           |
| augustus_masked-11-processed-gene-76.32-mRNA-1  | Japonica | Japonica |               | Os11g0215400 | OsR498G1119618400.01.T01 | Eukaryotic aspartyl protease family protein, expressed                          |
| augustus_masked-11-processed-gene-76.33-mRNA-1  | Japonica | NA       |               |              | OsR498G1119618800.01.T01 | Carboxyl-terminal peptidase, putative, expressed                                |
| augustus_masked-11-processed-gene-77.16-mRNA-1  | Japonica | NA       |               | Os11g0216400 | OsR498G1119621400.01.T01 | Multiple organellar RNA editing factor 1 mitochondrial                          |
| augustus_masked-11-processed-gene-8.106-mRNA-1  | Japonica | NA       | Kinase-TM     | Os11g0133100 | OsR498G1119372000.01.T01 | Receptor-like serine/threonine-protein kinase                                   |
| augustus_masked-11-processed-gene-8.107-mRNA-1  | Japonica | Japonica |               | Os11g0133200 | OsR498G0306499400.01.T02 | PPR domain-containing protein                                                   |
| augustus_masked-11-processed-gene-8.108-mRNA-1  | Japonica | NA       | Kinase-TM     | Os11g0133500 | OsR498G1220884400.01.T01 | Receptor-like serine/threonine-protein kinase                                   |
| augustus_masked-11-processed-gene-8.82-mRNA-1   | Japonica | Indica   |               | Os11g0132100 | OsR498G1119369400.01.T01 | PMEI domain-containing protein                                                  |
| augustus_masked-11-processed-gene-80.5-mRNA-1   | Japonica | NA       | Kinase-TM     | Os11g0222000 | OsR498G1119637400.01.T01 | Serine/threonine-protein kinase-like protein CCR4                               |
| augustus_masked-11-processed-gene-81.41-mRNA-1  | Japonica | NA       |               | Os11g0224400 | OsR498G1119640600.01.T01 |                                                                                 |
| augustus_masked-11-processed-gene-81.43-mRNA-1  | Japonica | NA       |               | Os11g0224600 | OsR498G1119641200.01.T01 |                                                                                 |
| augustus_masked-11-processed-gene-81.45-mRNA-1  | Japonica | Japonica | LRR-TM        | Os11g0224900 | OsR498G1119642200.01.T01 | NBS-LRR type protein (Fragment)                                                 |
| augustus_masked-11-processed-gene-82.26-mRNA-1  | Japonica | Indica   | CC-NBS-TM     | Os11g0226933 | OsR498G1119644200.01.T01 | NBS-LRR type protein (Fragment)                                                 |
| augustus_masked-11-processed-gene-83.18-mRNA-1  | Japonica | NA       | CC-LRR-NBS-TM |              |                          | NBS-LRR type protein (Fragment)                                                 |
| augustus_masked-11-processed-gene-85.7-mRNA-1   | Japonica | Indica   | LRR-TM        | Os11g0232100 | OsR498G1119658200.01.T01 | Receptor protein-tyrosine kinase CEPR2                                          |
| augustus_masked-11-processed-gene-88.41-mRNA-1  | Japonica | NA       |               |              | OsR498G1119676200.01.T01 | Serpin (Serine protease inhibitor)                                              |
| augustus_masked-11-processed-gene-88.46-mRNA-1  | Japonica | Japonica |               | Os11g0240000 | OsR498G1119681000.01.T01 | Gibberellin receptor GID1L2                                                     |
| augustus_masked-11-processed-gene-88.49-mRNA-1  | Japonica | NA       |               | Os11g0240600 | OsR498G1119681000.01.T01 | Gibberellin receptor GID1L2                                                     |
| augustus_masked-12-processed-gene-1.54-mRNA-1   | Japonica | NA       |               | Os11g0100800 | OsR498G1220784400.01.T01 |                                                                                 |
| augustus_masked-12-processed-gene-1.78-mRNA-1   | Japonica | NA       |               | Os12g0102300 | OsR498G1220788600.01.T03 | NEDD8-specific protease 1                                                       |
| augustus_masked-12-processed-gene-10.8-mRNA-1   | Japonica | NA       |               | Os12g0120100 | OsR498G1119335000.01.T01 | Eukaryotic translation initiation factor 2B family protein, putative, expressed |
| augustus_masked-12-processed-gene-100.19-mRNA-1 | Japonica | NA       |               |              |                          | Retrotransposon protein, putative, Ty1-copia subclass                           |
| augustus_masked-12-processed-gene-100.23-mRNA-1 | Japonica | NA       | CC-NBS-TM     |              |                          | NBS-LRR disease resistance protein, putative                                    |
| augustus_masked-12-processed-gene-101.18-mRNA-1 | Japonica | NA       |               | Os04g0563600 | OsR498G0204553600.01.T01 |                                                                                 |
| augustus_masked-12-processed-gene-102.18-mRNA-1 | Japonica | NA       | CC-NBS-TM     | Os12g0273000 | OsR498G1221277200.01.T02 | Disease resistance protein RPM1                                                 |
| augustus_masked-12-processed-gene-103.25-mRNA-1 | Japonica | NA       |               | Os12g0275201 |                          |                                                                                 |
| augustus_masked-12-processed-gene-104.26-mRNA-1 | Japonica | NA       |               |              | OsR498G1221290600.01.T01 | Polyubiquitin 9                                                                 |
| augustus_masked-12-processed-gene-108.24-mRNA-1 | Japonica | NA       | NBS-TM PITA   | Os12g0281300 | OsR498G1221311800.01.T01 | Blast resistance protein Pi-ta                                                  |
| augustus_masked-12-processed-gene-109.7-mRNA-1  | Japonica | Japonica |               | Os12g0282000 | OsR498G1221316000.01.T02 |                                                                                 |
| augustus_masked-12-processed-gene-111.17-mRNA-1 | Japonica | NA       |               | Os12g0286200 | OsR498G1221327800.01.T01 |                                                                                 |
| augustus_masked-12-processed-gene-123.23-mRNA-1 | Japonica | NA       |               | Os02g0319400 |                          | GST C-terminal domain-containing protein                                        |
| augustus_masked-12-processed-gene-126.16-mRNA-1 | Japonica | Indica   |               | Os12g0407400 | OsR498G1221371000.01.T01 | MADS-box domain-containing protein (Fragment)                                   |
| augustus_masked-12-processed-gene-126.33-mRNA-1 | Japonica | NA       |               | Os12g0407300 |                          | Mitochondrial protein ymf11                                                     |
| augustus_masked-12-processed-gene-126.35-mRNA-1 | Japonica | Japonica |               | Os12g0407400 | OsR498G1221371000.01.T01 | MADS-box domain-containing protein (Fragment)                                   |
| augustus_masked-12-processed-gene-127.3-mRNA-1  | Japonica | NA       |               |              | OsR498G1221373700.01.T01 |                                                                                 |
| augustus_masked-12-processed-gene-14.78-mRNA-1  | Japonica | Indica   |               | Os11g0132100 | OsR498G1220875000.01.T01 | PMEI domain-containing protein (Fragment)                                       |
| augustus_masked-12-processed-gene-149.15-mRNA-1 | Japonica | NA       |               | Os12g0435200 | OsR498G1221463200.01.T01 | Carotenoid cleavage dioxygenase                                                 |
| augustus_masked-12-processed-gene-15.24-mRNA-1  | Japonica | NA       | Kinase-TM     | Os12g0130300 | OsR498G1119372000.01.T01 | Receptor-like serine/threonine-protein kinase                                   |
| augustus_masked-12-processed-gene-15.26-mRNA-1  | Japonica | NA       | Kinase-TM     | Os11g0133100 | OsR498G1119373100.01.T01 | Receptor-like serine/threonine-protein kinase                                   |
| augustus_masked-12-processed-gene-15.29-mRNA-1  | Japonica | NA       | Kinase-TM     | Os11g0133500 | OsR498G1220884400.01.T01 | Receptor-like serine/threonine-protein kinase                                   |
| augustus_masked-12-processed-gene-152.21-mRNA-1 | Japonica | NA       |               | Os12g0438900 | OsR498G1221472800.01.T01 | Signal peptidase complex subunit like                                           |
| augustus_masked-12-processed-gene-155.9-mRNA-1  | Japonica | NA       |               | Os12g0442700 | OsR498G1221505800.01.T01 |                                                                                 |
| augustus_masked-12-processed-gene-161.13-mRNA-1 | Japonica | NA       |               |              | OsR498G1221521800.01.T01 |                                                                                 |
| augustus_masked-12-processed-gene-161.18-mRNA-1 | Japonica | NA       |               |              | OsR498G1221525000.01.T01 | Peptidase A1 domain-containing protein                                          |
| augustus_masked-12-processed-gene-162.11-mRNA-1 | Japonica | Indica   |               | Os12g0453500 | OsR498G1221528600.01.T01 |                                                                                 |
| augustus_masked-12-processed-gene-178.3-mRNA-1  | Japonica | NA       |               | Os12g0470700 | OsR498G1221574600.01.T01 | Adenosinetriphosphatase                                                         |
| augustus_masked-12-processed-gene-182.6-mRNA-1  | Japonica | NA       |               | Os03g0126900 |                          |                                                                                 |

|                                                 |          |          |           |              |                          |                                                                     |
|-------------------------------------------------|----------|----------|-----------|--------------|--------------------------|---------------------------------------------------------------------|
| augustus_masked-12-processed-gene-189.7-mRNA-1  | Japonica | NA       |           |              | OsR498G0101192000.01.T01 | Zinc knuckle containing protein-like                                |
| augustus_masked-12-processed-gene-189.9-mRNA-1  | Japonica | NA       |           |              | OsR498G0307015300.01.T01 | Retrotransposon protein, putative, unclassified, expressed          |
| augustus_masked-12-processed-gene-19.38-mRNA-1  | Japonica | Japonica |           | Os12g0134600 | OsR498G1220896200.01.T01 | Tryptamine hydroxycinnamoyltransferase 2                            |
| augustus_masked-12-processed-gene-19.44-mRNA-1  | Japonica | NA       |           | Os06g0688500 | OsR498G0510924300.01.T03 |                                                                     |
| augustus_masked-12-processed-gene-191.5-mRNA-1  | Japonica | NA       |           |              | OsR498G1221637400.01.T01 |                                                                     |
| augustus_masked-12-processed-gene-192.21-mRNA-1 | Japonica | NA       | NBS-TM    | Os12g0489800 | OsR498G1221649100.01.T01 | NB-ARC domain-containing protein                                    |
| augustus_masked-12-processed-gene-192.6-mRNA-1  | Japonica | NA       |           | Os12g0488900 | OsR498G1221645800.01.T01 | Pumilio 12 like                                                     |
| augustus_masked-12-processed-gene-20.10-mRNA-1  | Japonica | NA       |           |              | OsR498G1220902200.01.T01 | NAC domain-containing protein                                       |
| augustus_masked-12-processed-gene-20.28-mRNA-1  | Japonica | Indica   |           | Os12g0137600 | OsR498G1220904600.01.T01 | Alpha-galactosidase                                                 |
| augustus_masked-12-processed-gene-20.29-mRNA-1  | Japonica | NA       |           | Os12g0137700 | OsR498G1220904600.01.T02 | Alpha-galactosidase                                                 |
| augustus_masked-12-processed-gene-20.32-mRNA-1  | Japonica | NA       |           |              | OsR498G1119398600.01.T01 | Scarecrow-like protein 3                                            |
| augustus_masked-12-processed-gene-20.33-mRNA-1  | Japonica | NA       |           |              | OsR498G1220906800.01.T01 | GRAS domain-containing protein (Fragment)                           |
| augustus_masked-12-processed-gene-203.27-mRNA-1 | Japonica | Japonica |           | Os12g0506100 | OsR498G1221682400.01.T01 |                                                                     |
| augustus_masked-12-processed-gene-203.42-mRNA-1 | Japonica | NA       |           |              | OsR498G1221685900.01.T04 | Autophagy 10 variant 1                                              |
| augustus_masked-12-processed-gene-203.47-mRNA-1 | Japonica | NA       |           | Os12g0506500 |                          | Calmodulin-binding protein                                          |
| augustus_masked-12-processed-gene-203.49-mRNA-1 | Japonica | NA       |           | Os12g0507400 | OsR498G1221689000.01.T01 |                                                                     |
| augustus_masked-12-processed-gene-204.23-mRNA-1 | Japonica | NA       |           |              | OsR498G0100073600.01.T01 | RNA binding protein                                                 |
| augustus_masked-12-processed-gene-205.48-mRNA-1 | Japonica | Indica   |           | Os12g0510750 | OsR498G1221701800.01.T01 |                                                                     |
| augustus_masked-12-processed-gene-207.17-mRNA-1 | Japonica | Indica   |           | Os12g0512700 | OsR498G1221706000.01.T05 | Pleiotropic drug resistance protein 3                               |
| augustus_masked-12-processed-gene-21.40-mRNA-1  | Japonica | NA       |           |              | OsR498G1220912200.01.T01 |                                                                     |
| augustus_masked-12-processed-gene-21.42-mRNA-1  | Japonica | NA       |           | Os12g0140700 | OsR498G1220912600.01.T01 | RING finger protein 44                                              |
| augustus_masked-12-processed-gene-23.34-mRNA-1  | Japonica | NA       |           | Os12g0142600 | OsR498G1220919200.01.T02 | tRNA-uridine aminocarboxypropyltransferase                          |
| augustus_masked-12-processed-gene-23.36-mRNA-1  | Japonica | Indica   |           | Os02g0711400 | OsR498G1220919400.01.T01 | RING-type domain-containing protein                                 |
| augustus_masked-12-processed-gene-23.54-mRNA-1  | Japonica | NA       |           | Os12g0143300 | OsR498G1220920800.01.T05 | Excinuclease ABC C subunit N-terminal                               |
| augustus_masked-12-processed-gene-230.38-mRNA-1 | Japonica | NA       |           | Os12g0557800 | OsR498G1221868800.01.T03 | Putative pentatricopeptide repeat-containing protein, mitochondrial |
| augustus_masked-12-processed-gene-233.33-mRNA-1 | Japonica | Indica   |           | Os10g0122000 | OsR498G1221881400.01.T01 | Glycosyltransferase                                                 |
| augustus_masked-12-processed-gene-238.53-mRNA-1 | Japonica | NA       |           | Os12g0571300 | OsR498G1221911600.01.T01 | Microneme/rhoptry antigen                                           |
| augustus_masked-12-processed-gene-240.15-mRNA-1 | Japonica | NA       | Kinase-TM |              | OsR498G1221922000.01.T01 | Mitogen-activated protein kinase kinase kinase                      |
| augustus_masked-12-processed-gene-240.16-mRNA-1 | Japonica | Japonica |           | Os12g0574800 | OsR498G1221924200.01.T03 | Transcription initiation factor TFIID subunit 8                     |
| augustus_masked-12-processed-gene-240.4-mRNA-1  | Japonica | NA       |           |              | OsR498G1221920600.01.T01 | rRNA N-glycosidase                                                  |
| augustus_masked-12-processed-gene-241.20-mRNA-1 | Japonica | NA       |           | Os10g0186900 | OsR498G0101463500.01.T01 | FBD domain-containing protein                                       |
| augustus_masked-12-processed-gene-250.25-mRNA-1 | Japonica | NA       |           | Os12g0590400 | OsR498G1222005000.01.T01 | DUF1618 domain-containing protein (Fragment)                        |
| augustus_masked-12-processed-gene-253.75-mRNA-1 | Japonica | NA       |           |              | OsR498G1222033000.01.T01 | Ring finger protein, putative                                       |
| augustus_masked-12-processed-gene-255.40-mRNA-1 | Japonica | NA       |           |              | OsR498G1222046400.01.T01 | Pectinesterase inhibitor domain containing protein, expressed       |
| augustus_masked-12-processed-gene-259.67-mRNA-1 | Japonica | NA       |           | Os12g0606000 |                          | Gnk2-homologous domain-containing protein (Fragment)                |
| augustus_masked-12-processed-gene-26.21-mRNA-1  | Japonica | NA       |           | Os12g0149300 | OsR498G1220943800.01.T01 | Putative xyloglucan 6-xylosyltransferase                            |
| augustus_masked-12-processed-gene-26.24-mRNA-1  | Japonica | NA       |           | Os12g0150100 | OsR498G1220945800.01.T01 | KOW domain-containing protein                                       |
| augustus_masked-12-processed-gene-26.25-mRNA-1  | Japonica | NA       |           | Os12g0150200 | OsR498G1220946600.01.T01 | Cytochrome P450 family protein, expressed                           |
| augustus_masked-12-processed-gene-260.34-mRNA-1 | Japonica | NA       |           | Os12g0166700 | OsR498G1120733700.01.T01 | Retrotransposon protein, putative, Ty3-gypsy sub-class              |
| augustus_masked-12-processed-gene-260.37-mRNA-1 | Japonica | NA       | Kinase-TM |              | OsR498G1222080800.01.T01 | Lectin protein kinase, putative, expressed                          |
| augustus_masked-12-processed-gene-260.42-mRNA-1 | Japonica | NA       |           | Os12g0609600 | OsR498G1222082800.01.T01 | Small auxin up regulated protein                                    |
| augustus_masked-12-processed-gene-261.35-mRNA-1 | Japonica | Japonica |           | Os12g0609900 | OsR498G1222083400.01.T01 | F-box domain containing protein expressed                           |
| augustus_masked-12-processed-gene-261.37-mRNA-1 | Japonica | NA       |           | Os12g0610300 |                          | Formin-like protein 5                                               |
| augustus_masked-12-processed-gene-264.61-mRNA-1 | Japonica | NA       |           | Os12g0615800 | OsR498G1222106200.01.T03 | Septin and tuftelin-interacting protein 1                           |
| augustus_masked-12-processed-gene-265.12-mRNA-1 | Japonica | NA       |           | Os12g0616800 | OsR498G1222111000.01.T01 | 101 kDa malaria antigen-like                                        |
| augustus_masked-12-processed-gene-265.14-mRNA-1 | Japonica | NA       |           | Os12g0617001 |                          | C2H2-type zinc-finger transcription factor (Fragment)               |
| augustus_masked-12-processed-gene-27.26-mRNA-1  | Japonica | Japonica |           | Os12g0150750 | OsR498G1220948000.01.T01 | Purple acid phosphatase                                             |
| augustus_masked-12-processed-gene-27.29-mRNA-1  | Japonica | NA       |           | Os12g0152200 |                          | DUF295 domain-containing protein                                    |
| augustus_masked-12-processed-gene-272.42-mRNA-1 | Japonica | Japonica |           | Os12g0628600 | OsR498G1222150400.01.T01 | Thaumatococcus-like protein (Fragment)                              |
| augustus_masked-12-processed-gene-3.8-mRNA-1    | Japonica | NA       |           | Os12g0104900 | OsR498G1220796000.01.T01 | Probable calcium-binding protein CML31                              |
| augustus_masked-12-processed-gene-34.46-mRNA-1  | Japonica | NA       |           | Os12g0163500 | OsR498G1221003600.01.T02 | GTgamma-3                                                           |
| augustus_masked-12-processed-gene-34.47-mRNA-1  | Japonica | NA       |           | Os12g0163600 | OsR498G1221004000.01.T01 | Pentatricopeptide repeat                                            |
| augustus_masked-12-processed-gene-36.32-mRNA-1  | Japonica | NA       |           | Os04g0429450 | OsR498G0408675500.01.T01 | Retrotransposon protein, putative, Ty3-gypsy sub-class              |
| augustus_masked-12-processed-gene-42.49-mRNA-1  | Japonica | NA       |           |              | OsR498G1221045400.01.T01 |                                                                     |
| augustus_masked-12-processed-gene-44.69-mRNA-1  | Japonica | NA       |           |              | OsR498G1221053400.01.T01 |                                                                     |
| augustus_masked-12-processed-gene-50.21-mRNA-1  | Japonica | NA       | CC-NBS-TM |              | OsR498G1221076200.01.T01 | Disease resistance protein RPM1                                     |
| augustus_masked-12-processed-gene-51.11-mRNA-1  | Japonica | Japonica |           | Os12g0195100 | OsR498G1221047500.01.T01 | Amino acid permease 2                                               |
| augustus_masked-12-processed-gene-51.5-mRNA-1   | Japonica | NA       |           | Os12g0194800 |                          | tRNA pseudouridine synthase                                         |
| augustus_masked-12-processed-gene-51.9-mRNA-1   | Japonica | NA       |           | Os07g0561900 | OsR498G0100572500.01.T01 | Thiamine diphosphokinase                                            |
| augustus_masked-12-processed-gene-57.32-mRNA-1  | Japonica | Japonica | NBS-TM    | Os12g0205500 | OsR498G1221100000.01.T02 | NB-ARC domain containing protein, expressed                         |
| augustus_masked-12-processed-gene-59.18-mRNA-1  | Japonica | NA       | CC-NBS-TM |              |                          | Disease resistance protein RGA2                                     |

|                                                 |          |          |           |              |                          |                                                                |
|-------------------------------------------------|----------|----------|-----------|--------------|--------------------------|----------------------------------------------------------------|
| augustus_masked-12-processed-gene-60.19-mRNA-1  | Japonica | Japonica | LRR-TM    | Os12g0211500 | OsR498G1221115800.01.T01 | Leucine Rich Repeat family protein, expressed                  |
| augustus_masked-12-processed-gene-60.2-mRNA-1   | Japonica | NA       |           | Os12g0210500 | OsR498G1221110600.01.T01 |                                                                |
| augustus_masked-12-processed-gene-69.26-mRNA-1  | Japonica | NA       |           |              | OsR498G0100073600.01.T01 | RNA binding protein                                            |
| augustus_masked-12-processed-gene-7.58-mRNA-1   | Japonica | NA       |           |              | OsR498G1220822400.01.T01 | Protein kinase domain-containing protein                       |
| augustus_masked-12-processed-gene-7.59-mRNA-1   | Japonica | NA       | Kinase-TM | Os12g0113500 | OsR498G1220822800.01.T01 | Non-specific serine/threonine protein kinase                   |
| augustus_masked-12-processed-gene-7.62-mRNA-1   | Japonica | NA       |           |              | OsR498G1119316400.01.T01 | Laminin subunit alpha-5 (Fragment)                             |
| augustus_masked-12-processed-gene-70.36-mRNA-1  | Japonica | NA       |           | Os12g0225300 |                          | FAR1 domain-containing protein                                 |
| augustus_masked-12-processed-gene-73.22-mRNA-1  | Japonica | NA       |           | Os12g0230133 | OsR498G1221156200.01.T01 | UVR domain-containing protein                                  |
| augustus_masked-12-processed-gene-75.47-mRNA-1  | Japonica | NA       |           | Os12g0233200 | OsR498G1221165600.01.T05 | Selenium-binding protein-like protein                          |
| augustus_masked-12-processed-gene-78.39-mRNA-1  | Japonica | Indica   |           | Os09g0552200 | OsR498G1221184800.01.T01 |                                                                |
| augustus_masked-12-processed-gene-8.23-mRNA-1   | Japonica | NA       |           | Os11g0116500 | OsR498G1119324200.01.T02 |                                                                |
| augustus_masked-12-processed-gene-80.15-mRNA-1  | Japonica | NA       |           |              | OsR498G1221193800.01.T01 |                                                                |
| augustus_masked-12-processed-gene-81.3-mRNA-1   | Japonica | NA       |           | Os12g0242100 | OsR498G1221196400.01.T01 |                                                                |
| augustus_masked-12-processed-gene-9.51-mRNA-1   | Japonica | NA       |           | Os12g0117400 | OsR498G1220835700.01.T01 | Root phototropism protein 2                                    |
| augustus_masked-12-processed-gene-96.38-mRNA-1  | Japonica | NA       |           |              | OsR498G1221247400.01.T01 |                                                                |
| augustus_masked-2-processed-gene-120.57-mRNA-1  | Japonica | Indica   |           | Os08g0543050 | OsR498G0203525000.01.T01 | ADP-ribosyl cyclase/cyclic ADP-ribose hydrolase                |
| augustus_masked-2-processed-gene-128.31-mRNA-1  | Japonica | NA       |           | Os02g0321000 | OsR498G0203567200.01.T02 | Fertility restorer                                             |
| augustus_masked-2-processed-gene-155.20-mRNA-1  | Japonica | NA       |           |              | OsR498G0100463800.01.T01 | HGWP repeat containing protein-like                            |
| augustus_masked-2-processed-gene-162.2-mRNA-1   | Japonica | NA       |           |              | OsR498G0203777900.01.T01 |                                                                |
| augustus_masked-2-processed-gene-184.28-mRNA-1  | Japonica | NA       |           |              | OsR498G0203894800.01.T01 |                                                                |
| augustus_masked-2-processed-gene-186.16-mRNA-1  | Japonica | NA       |           |              | OsR498G1120154400.01.T01 |                                                                |
| augustus_masked-2-processed-gene-195.15-mRNA-1  | Japonica | NA       |           | Os02g0523800 | OsR498G0203962500.01.T02 | Inositol polyphosphate multikinase                             |
| augustus_masked-2-processed-gene-220.18-mRNA-1  | Japonica | NA       |           |              | OsR498G0204142300.01.T01 | Hepatoma-derived growth factor-related protein 2-like          |
| augustus_masked-2-processed-gene-258.41-mRNA-1  | Japonica | Indica   |           | Os01g0721800 | OsR498G0204358400.01.T01 | Fusarium resistance protein I2C-5-like                         |
| augustus_masked-2-processed-gene-307.71-mRNA-1  | Japonica | NA       |           | Os02g0721200 |                          | Ubiquitin-conjugating enzyme E2 5                              |
| augustus_masked-2-processed-gene-367.74-mRNA-1  | Japonica | NA       |           | Os02g0780200 | OsR498G0204877800.01.T01 | Subtilisin-like protease                                       |
| augustus_masked-2-processed-gene-376.26-mRNA-1  | Japonica | NA       |           | Os02g0798450 | OsR498G0204942600.01.T01 |                                                                |
| augustus_masked-2-processed-gene-393.133-mRNA-1 | Japonica | Indica   |           | Os02g0832700 | OsR498G0205054700.01.T03 | Metal tolerance protein 5                                      |
| augustus_masked-2-processed-gene-54.4-mRNA-1    | Japonica | Indica   |           | Os02g0194900 | OsR498G0203147100.01.T01 | Transcription factor TGA1                                      |
| augustus_masked-2-processed-gene-66.43-mRNA-1   | Japonica | NA       |           |              | OsR498G1221141800.01.T01 | Retrotransposon protein, putative, Ty3-gypsy sub-class         |
| augustus_masked-2-processed-gene-78.49-mRNA-1   | Japonica | NA       |           | Os02g0235600 | OsR498G0203297700.01.T02 | Ribosomal L5P family protein isoform 1                         |
| augustus_masked-2-processed-gene-87.31-mRNA-1   | Japonica | NA       |           | Os02g0254550 |                          | BED-type domain-containing protein                             |
| augustus_masked-2-processed-gene-88.59-mRNA-1   | Japonica | NA       |           | Os02g0255000 | OsR498G0203347800.01.T01 | Cyclic nucleotide-gated ion channel 1                          |
| augustus_masked-3-processed-gene-1.13-mRNA-1    | Japonica | NA       |           | Os03g0106900 | OsR498G0305087100.01.T01 | Group I pollen allergen                                        |
| augustus_masked-3-processed-gene-1.25-mRNA-1    | Japonica | NA       |           | Os03g0106800 | OsR498G0305087800.01.T01 | Group I pollen allergen                                        |
| augustus_masked-3-processed-gene-100.35-mRNA-1  | Japonica | NA       |           |              |                          |                                                                |
| augustus_masked-3-processed-gene-100.44-mRNA-1  | Japonica | NA       |           | Os03g0294500 |                          | Trihelix transcription factor ASIL2                            |
| augustus_masked-3-processed-gene-100.58-mRNA-1  | Japonica | Indica   |           | Os03g0295300 | OsR498G0305748800.01.T01 |                                                                |
| augustus_masked-3-processed-gene-101.64-mRNA-1  | Japonica | NA       |           |              | OsR498G0305753100.01.T01 | (1->3)-beta-glucan endohydrolase                               |
| augustus_masked-3-processed-gene-101.65-mRNA-1  | Japonica | NA       |           | Os03g0296600 | OsR498G0305753300.01.T01 | Egg cell-secreted protein 1.1                                  |
| augustus_masked-3-processed-gene-101.81-mRNA-1  | Japonica | NA       |           | Os03g0295800 | OsR498G0305751000.01.T04 | Gamma interferon inducible lysosomal thiol reductase GILT      |
| augustus_masked-3-processed-gene-102.36-mRNA-1  | Japonica | NA       |           | Os03g0297600 | OsR498G0305756400.01.T01 | Abscisic acid receptor 7                                       |
| augustus_masked-3-processed-gene-103.14-mRNA-1  | Japonica | Indica   |           | Os07g0690900 | OsR498G0305770700.01.T01 | COBRA-like protein 7                                           |
| augustus_masked-3-processed-gene-103.2-mRNA-1   | Japonica | NA       |           | Os03g0300100 |                          |                                                                |
| augustus_masked-3-processed-gene-103.23-mRNA-1  | Japonica | NA       |           | Os03g0300500 | OsR498G0305767200.01.T01 | Pectinesterase                                                 |
| augustus_masked-3-processed-gene-103.25-mRNA-1  | Japonica | NA       |           | Os03g0300700 |                          |                                                                |
| augustus_masked-3-processed-gene-103.6-mRNA-1   | Japonica | NA       |           | Os03g0299800 | OsR498G0305764800.01.T01 | Protein PLANT CADMIUM RESISTANCE 7                             |
| augustus_masked-3-processed-gene-103.7-mRNA-1   | Japonica | NA       |           |              | OsR498G0714024600.01.T01 |                                                                |
| augustus_masked-3-processed-gene-103.8-mRNA-1   | Japonica | Indica   |           | Os03g0300000 | OsR498G0305766000.01.T01 | Xyloglucan xylosyltransferase                                  |
| augustus_masked-3-processed-gene-104.16-mRNA-1  | Japonica | NA       |           | Os03g0302800 | OsR498G0305774900.01.T01 | Beta-fructofuranosidase, insoluble isoenzyme CWINV6 (Fragment) |
| augustus_masked-3-processed-gene-104.18-mRNA-1  | Japonica | NA       |           | Os03g0303100 | OsR498G0305776300.01.T01 | Calmodulin-binding protein-like                                |
| augustus_masked-3-processed-gene-104.2-mRNA-1   | Japonica | NA       |           | Os03g0301950 | OsR498G0305773500.01.T01 | Peroxisomal membrane protein like                              |
| augustus_masked-3-processed-gene-104.3-mRNA-1   | Japonica | NA       |           | Os03g0302000 | OsR498G0305773700.01.T02 | Peroxisomal membrane protein like                              |
| augustus_masked-3-processed-gene-106.38-mRNA-1  | Japonica | NA       |           |              | OsR498G0305786100.01.T01 | Argininosuccinate lyase                                        |
| augustus_masked-3-processed-gene-106.47-mRNA-1  | Japonica | NA       |           | Os03g0305200 |                          | Multidrug resistance protein ABC transporter family protein    |
| augustus_masked-3-processed-gene-106.55-mRNA-1  | Japonica | Japonica |           | Os03g0306100 | OsR498G0305787900.01.T01 | Xyloglucan 6-xylosyltransferase 2                              |
| augustus_masked-3-processed-gene-106.57-mRNA-1  | Japonica | Japonica |           | Os03g0306800 | OsR498G0100750200.01.T01 | CP12 domain-containing protein (Fragment)                      |
| augustus_masked-3-processed-gene-106.65-mRNA-1  | Japonica | Japonica |           | Os03g0305800 | OsR498G0305787900.01.T01 | Xyloglucan 6-xylosyltransferase 2                              |
| augustus_masked-3-processed-gene-107.1-mRNA-1   | Japonica | NA       |           | Os03g0307200 | OsR498G0305791800.01.T01 | Nicotianamine synthase                                         |
| augustus_masked-3-processed-gene-107.11-mRNA-1  | Japonica | NA       |           | Os03g0307900 |                          |                                                                |
| augustus_masked-3-processed-gene-107.12-mRNA-1  | Japonica | NA       |           | Os03g0308000 | OsR498G0305793900.01.T03 | Ubiquitin-conjugating enzyme like                              |



|                                                |          |        |                  |              |                          |                                                                     |
|------------------------------------------------|----------|--------|------------------|--------------|--------------------------|---------------------------------------------------------------------|
| augustus_masked-3-processed-gene-108.42-mRNA-1 | Japonica | NA     |                  | Os03g0309800 | OsR498G0305799900.01.T04 | Pentatricopeptide repeat-containing protein, chloroplastic          |
| augustus_masked-3-processed-gene-109.2-mRNA-1  | Japonica | NA     |                  | Os03g0311600 | OsR498G0305805500.01.T01 | Transcription factor bHLH148                                        |
| augustus_masked-3-processed-gene-110.41-mRNA-1 | Japonica | NA     |                  | Os03g0314400 | OsR498G0305815500.01.T05 | Pentatricopeptide repeat-containing protein mitochondrial           |
| augustus_masked-3-processed-gene-111.43-mRNA-1 | Japonica | NA     |                  |              | OsR498G0100075100.01.T01 | Epstein-Barr virus EBNA-1-like                                      |
| augustus_masked-3-processed-gene-112.0-mRNA-1  | Japonica | NA     |                  | Os03g0317100 | OsR498G0305825700.01.T04 | Pentatricopeptide repeat-containing protein, mitochondrial          |
| augustus_masked-3-processed-gene-112.1-mRNA-1  | Japonica | NA     |                  | Os03g0317300 | OsR498G0305826500.01.T01 | Peptidase A1 domain-containing protein (Fragment)                   |
| augustus_masked-3-processed-gene-112.15-mRNA-1 | Japonica | NA     |                  | Os03g0318400 | OsR498G0305828500.01.T01 | Peptidase A1 domain-containing protein (Fragment)                   |
| augustus_masked-3-processed-gene-112.16-mRNA-1 | Japonica | NA     |                  |              | OsR498G0305830700.01.T01 | VQ motif family protein expressed                                   |
| augustus_masked-3-processed-gene-113.14-mRNA-1 | Japonica | NA     |                  | Os03g0320900 | OsR498G0305839500.01.T03 | Guanylate kinase                                                    |
| augustus_masked-3-processed-gene-113.22-mRNA-1 | Japonica | NA     |                  | Os03g0320500 | OsR498G0305836200.01.T01 | VQ domain-containing protein                                        |
| augustus_masked-3-processed-gene-114.35-mRNA-1 | Japonica | NA     |                  | Os03g0321300 | OsR498G0305840900.01.T01 | F-box domain containing protein, expressed                          |
| augustus_masked-3-processed-gene-114.60-mRNA-1 | Japonica | NA     |                  | Os03g0321800 | OsR498G0305845000.01.T04 | Lipoyl(octanoyl) transferase                                        |
| augustus_masked-3-processed-gene-118.15-mRNA-1 | Japonica | NA     |                  | Os03g0103300 | OsR498G0305077300.01.T01 | AAI domain-containing protein (Fragment)                            |
| augustus_masked-3-processed-gene-119.28-mRNA-1 | Japonica | NA     |                  | Os10g0557900 | OsR498G1019184200.01.T01 | Metalloendoproteinase                                               |
| augustus_masked-3-processed-gene-119.31-mRNA-1 | Japonica | NA     |                  | Os10g0557900 | OsR498G1019184200.01.T01 | ZnMc domain-containing protein (Fragment)                           |
| augustus_masked-3-processed-gene-119.9-mRNA-1  | Japonica | NA     |                  | Os03g0104400 | OsR498G0305808200.01.T01 | PB1 domain-containing protein                                       |
| augustus_masked-3-processed-gene-12.55-mRNA-1  | Japonica | NA     | Kinase-TM        | Os03g0124200 | OsR498G0305151700.01.T01 | Receptor-like protein kinase HERK 1 isoform A                       |
| augustus_masked-3-processed-gene-12.56-mRNA-1  | Japonica | Indica |                  | Os03g0124300 | OsR498G0305151900.01.T04 | Malectin-like carbohydrate-binding domain                           |
| augustus_masked-3-processed-gene-121.47-mRNA-1 | Japonica | NA     |                  | Os10g0560700 | OsR498G1019194600.01.T01 | Ethylene-responsive transcription factor TINY-like                  |
| augustus_masked-3-processed-gene-125.65-mRNA-1 | Japonica | NA     |                  | Os04g0559000 | OsR498G1019224100.01.T01 | Subtilisin-like protease                                            |
| augustus_masked-3-processed-gene-125.67-mRNA-1 | Japonica | NA     |                  | Os10g0568900 | OsR498G1019225500.01.T04 | Haloacid dehalogenase-like hydrolase domain-containing protein Sgpp |
| augustus_masked-3-processed-gene-125.81-mRNA-1 | Japonica | NA     |                  | Os10g0568000 | OsR498G1019222800.01.T01 |                                                                     |
| augustus_masked-3-processed-gene-125.82-mRNA-1 | Japonica | NA     |                  |              | OsR498G1019222800.01.T01 | F-box domain containing protein, expressed                          |
| augustus_masked-3-processed-gene-125.83-mRNA-1 | Japonica | NA     |                  | Os10g0568100 | OsR498G1019223000.01.T04 | VAN3-binding protein-like                                           |
| augustus_masked-3-processed-gene-126.14-mRNA-1 | Japonica | NA     |                  | Os11g0145100 | OsR498G0917727700.01.T01 | tRNA-uridine aminocarboxypropyltransferase                          |
| augustus_masked-3-processed-gene-126.20-mRNA-1 | Japonica | NA     |                  | Os10g0570700 | OsR498G1019231300.01.T01 | rRNA N-glycosidase                                                  |
| augustus_masked-3-processed-gene-127.0-mRNA-1  | Japonica | NA     |                  | Os10g0571600 | OsR498G1019234100.01.T01 | NAC domain-containing protein 86                                    |
| augustus_masked-3-processed-gene-127.23-mRNA-1 | Japonica | NA     |                  | Os10g0573200 |                          | RPM1 interacting protein 13                                         |
| augustus_masked-3-processed-gene-127.9-mRNA-1  | Japonica | NA     |                  |              | OsR498G0306492600.01.T01 | protein FAR-RED IMPAIRED RESPONSE 1-like                            |
| augustus_masked-3-processed-gene-128.15-mRNA-1 | Japonica | NA     |                  | Os10g0573900 | OsR498G1019239600.01.T06 | 60S ribosomal export protein NMD3                                   |
| augustus_masked-3-processed-gene-128.23-mRNA-1 | Japonica | NA     |                  | Os10g0574400 |                          | E3 ubiquitin-protein ligase ATL6                                    |
| augustus_masked-3-processed-gene-128.26-mRNA-1 | Japonica | NA     |                  | Os10g0575000 | OsR498G1019243900.01.T01 | Transcription factor like                                           |
| augustus_masked-3-processed-gene-129.20-mRNA-1 | Japonica | NA     |                  | Os10g0576100 | OsR498G1019247600.01.T01 | Inositol-tetrakisphosphate 1-kinase                                 |
| augustus_masked-3-processed-gene-130.1-mRNA-1  | Japonica | NA     |                  |              | OsR498G1019250500.01.T01 | Putative WEB family protein chloroplastic                           |
| augustus_masked-3-processed-gene-130.5-mRNA-1  | Japonica | NA     |                  | Os10g0577200 | OsR498G1019250800.01.T02 | VQ domain-containing protein                                        |
| augustus_masked-3-processed-gene-131.1-mRNA-1  | Japonica | NA     |                  | Os10g0578600 | OsR498G1019255200.01.T01 | Amelogenin, X like                                                  |
| augustus_masked-3-processed-gene-134.34-mRNA-1 | Japonica | NA     |                  | Os10g0530700 | OsR498G1019083900.01.T01 | Glutathione transferase                                             |
| augustus_masked-3-processed-gene-134.35-mRNA-1 | Japonica | NA     |                  | Os10g0530900 | OsR498G1019083900.01.T01 | Glutathione S-transferase GSTU6                                     |
| augustus_masked-3-processed-gene-134.36-mRNA-1 | Japonica | NA     |                  | Os10g0531400 | OsR498G1019074700.01.T01 | Glutathione transferase                                             |
| augustus_masked-3-processed-gene-134.38-mRNA-1 | Japonica | NA     |                  |              | OsR498G1019086300.01.T01 | Kinesin heavy chain-like                                            |
| augustus_masked-3-processed-gene-134.57-mRNA-1 | Japonica | NA     | CC-Kinase-LRR-TM | Os10g0531700 | OsR498G1019085800.01.T01 | LRR receptor-like serine/threonine-protein kinase                   |
| augustus_masked-3-processed-gene-135.10-mRNA-1 | Japonica | NA     |                  | Os10g0533200 | OsR498G1019092300.01.T01 | Mu-crystallin                                                       |
| augustus_masked-3-processed-gene-135.13-mRNA-1 | Japonica | NA     | Kinase-TM        | Os10g0533800 | OsR498G1019094500.01.T01 | L-type lectin-domain containing receptor kinase IV.1                |
| augustus_masked-3-processed-gene-135.20-mRNA-1 | Japonica | NA     |                  | Os10g0532300 | OsR498G1019088600.01.T01 | HMA domain-containing protein                                       |
| augustus_masked-3-processed-gene-135.22-mRNA-1 | Japonica | NA     |                  | Os10g0533100 | OsR498G1019091800.01.T01 | ABC-type Co2+ transport system, permease component                  |
| augustus_masked-3-processed-gene-135.8-mRNA-1  | Japonica | NA     |                  | Os10g0532600 | OsR498G1019090300.01.T01 | Transcription repressor                                             |
| augustus_masked-3-processed-gene-136.7-mRNA-1  | Japonica | NA     | Kinase-TM        | Os10g0534500 | OsR498G1019095800.01.T03 | Receptor-like protein kinase THESEUS 1                              |
| augustus_masked-3-processed-gene-137.12-mRNA-1 | Japonica | NA     |                  | Os10g0537800 | OsR498G1019107900.01.T01 | Putative chloroplast nucleoid DNA binding protein                   |
| augustus_masked-3-processed-gene-137.26-mRNA-1 | Japonica | NA     |                  |              | OsR498G0204768400.01.T01 | Epstein-Barr virus EBNA-1-like                                      |
| augustus_masked-3-processed-gene-138.13-mRNA-1 | Japonica | NA     |                  | Os10g0538200 | OsR498G1019109300.01.T01 | Putative chloroplast nucleoid DNA binding protein                   |
| augustus_masked-3-processed-gene-138.23-mRNA-1 | Japonica | NA     |                  | Os10g0538200 | OsR498G1019109700.01.T01 | Putative chloroplast nucleoid DNA binding protein                   |
| augustus_masked-3-processed-gene-138.24-mRNA-1 | Japonica | NA     |                  | Os10g0538200 | OsR498G1019110300.01.T01 | Putative chloroplast nucleoid DNA binding protein                   |
| augustus_masked-3-processed-gene-138.28-mRNA-1 | Japonica | NA     |                  | Os10g0539700 | OsR498G1019112900.01.T01 | C2 NT-type domain-containing protein (Fragment)                     |
| augustus_masked-3-processed-gene-138.38-mRNA-1 | Japonica | NA     |                  |              | OsR498G1019111000.01.T01 | N-acetylneuraminate 7-O(Or 9-O)-acetyltransferase                   |
| augustus_masked-3-processed-gene-138.39-mRNA-1 | Japonica | NA     |                  | Os10g0539500 | OsR498G1019111200.01.T01 | Multifunctional fusion protein                                      |
| augustus_masked-3-processed-gene-138.42-mRNA-1 | Japonica | NA     |                  | Os10g0540100 | OsR498G1019115200.01.T01 | Pentatricopeptide repeat                                            |
| augustus_masked-3-processed-gene-138.6-mRNA-1  | Japonica | NA     |                  | Os10g0538200 | OsR498G1019107900.01.T01 | Putative chloroplast nucleoid DNA binding protein                   |
| augustus_masked-3-processed-gene-138.8-mRNA-1  | Japonica | NA     |                  | Os10g0538200 | OsR498G1019108300.01.T01 | Putative chloroplast nucleoid DNA binding protein                   |
| augustus_masked-3-processed-gene-139.10-mRNA-1 | Japonica | NA     |                  | Os07g0543700 | OsR498G0408675500.01.T01 | Retrotransposon protein, putative, Ty3-gypsy sub-class              |
| augustus_masked-3-processed-gene-139.11-mRNA-1 | Japonica | NA     |                  |              | OsR498G1019116800.01.T01 |                                                                     |
| augustus_masked-3-processed-gene-139.14-mRNA-1 | Japonica | NA     |                  | Os10g0540900 | OsR498G1019118300.01.T03 |                                                                     |

|                                                |          |          |               |              |                          |                                                                        |
|------------------------------------------------|----------|----------|---------------|--------------|--------------------------|------------------------------------------------------------------------|
| augustus_masked-3-processed-gene-139.3-mRNA-1  | Japonica | NA       |               | Os10g0540800 | OsR498G1019117300.01.T01 |                                                                        |
| augustus_masked-3-processed-gene-14.40-mRNA-1  | Japonica | NA       |               |              | OsR498G0305165100.01.T01 | Monosaccharide-sensing protein 3                                       |
| augustus_masked-3-processed-gene-14.50-mRNA-1  | Japonica | NA       |               | Os03g0129300 | OsR498G0305166900.01.T02 | Glyceraldehyde-3-phosphate dehydrogenase B, chloroplastic              |
| augustus_masked-3-processed-gene-140.42-mRNA-1 | Japonica | NA       |               | Os10g0542900 | OsR498G1019125300.01.T01 | Class II chitinase                                                     |
| augustus_masked-3-processed-gene-140.55-mRNA-1 | Japonica | NA       |               | Os10g0543150 |                          |                                                                        |
| augustus_masked-3-processed-gene-142.52-mRNA-1 | Japonica | NA       |               | Os10g0548400 |                          | Mediator of RNA polymerase II transcription subunit like               |
| augustus_masked-3-processed-gene-142.63-mRNA-1 | Japonica | NA       |               | Os10g0548100 | OsR498G1019140200.01.T01 | 3-oxoacyl-[acyl-carrier-protein] synthase III, chloroplastic           |
| augustus_masked-3-processed-gene-142.65-mRNA-1 | Japonica | NA       | CC-Kinase-TM  | Os10g0548300 | OsR498G1019140600.01.T06 | E3 ubiquitin ligase                                                    |
| augustus_masked-3-processed-gene-143.4-mRNA-1  | Japonica | NA       |               | Os10g0548800 | OsR498G1019141200.01.T01 | Translocase of chloroplast 120 chloroplastic                           |
| augustus_masked-3-processed-gene-144.14-mRNA-1 | Japonica | NA       |               | Os10g0550900 | OsR498G1019148500.01.T01 | Proline dehydrogenase                                                  |
| augustus_masked-3-processed-gene-144.30-mRNA-1 | Japonica | NA       |               | Os10g0551200 | OsR498G1019149600.01.T01 | GRAS transcription factor                                              |
| augustus_masked-3-processed-gene-145.2-mRNA-1  | Japonica | NA       |               | Os10g0551900 | OsR498G1019153400.01.T01 | Cortical cell-delineating protein-like                                 |
| augustus_masked-3-processed-gene-145.5-mRNA-1  | Japonica | NA       |               | Os10g0552300 | OsR498G1019154800.01.T01 | Cortical cell delineating protein, putative, expressed                 |
| augustus_masked-3-processed-gene-145.7-mRNA-1  | Japonica | NA       |               | Os10g0552600 | OsR498G1019156200.01.T01 | Cortical cell-delineating protein-like                                 |
| augustus_masked-3-processed-gene-146.27-mRNA-1 | Japonica | NA       |               | Os10g0554800 | OsR498G1019164500.01.T01 | AAI domain-containing protein (Fragment)                               |
| augustus_masked-3-processed-gene-146.34-mRNA-1 | Japonica | NA       |               | Os10g0554900 | OsR498G1019164800.01.T02 | QWRF motif-containing protein 7                                        |
| augustus_masked-3-processed-gene-148.37-mRNA-1 | Japonica | NA       |               | Os03g0324700 | OsR498G0305854900.01.T01 | Arabinosyltransferase ARAD1                                            |
| augustus_masked-3-processed-gene-148.50-mRNA-1 | Japonica | NA       | CC-LRR-NBS-TM | Os03g0324600 | OsR498G0305854800.01.T01 | NB-ARC domain containing protein, expressed                            |
| augustus_masked-3-processed-gene-149.0-mRNA-1  | Japonica | NA       |               | Os03g0324900 | OsR498G0305855900.01.T02 | RING-type E3 ubiquitin transferase                                     |
| augustus_masked-3-processed-gene-149.24-mRNA-1 | Japonica | NA       |               | Os03g0325600 | OsR498G0305857800.01.T02 | Homeobox domain containing protein, expressed                          |
| augustus_masked-3-processed-gene-15.54-mRNA-1  | Japonica | NA       | Kinase-TM     |              |                          | Serine/threonine-protein kinase Cx32, chloroplast, putative, expressed |
| augustus_masked-3-processed-gene-152.37-mRNA-1 | Japonica | NA       |               |              | OsR498G0305877200.01.T01 |                                                                        |
| augustus_masked-3-processed-gene-153.48-mRNA-1 | Japonica | NA       | Kinase-LRR-TM | Os03g0332900 | OsR498G0305887500.01.T03 | Putative inactive receptor kinase                                      |
| augustus_masked-3-processed-gene-154.30-mRNA-1 | Japonica | Japonica | Kinase-TM     | Os03g0333200 | OsR498G0305888100.01.T01 | Receptor-like protein kinase FERONIA                                   |
| augustus_masked-3-processed-gene-154.31-mRNA-1 | Japonica | NA       |               | Os03g0333300 | OsR498G0305888500.01.T01 | Eukaryotic translation initiation factor 2 subunit beta                |
| augustus_masked-3-processed-gene-155.25-mRNA-1 | Japonica | NA       |               | Os03g0336400 | OsR498G0305898600.01.T01 | Expansin                                                               |
| augustus_masked-3-processed-gene-155.3-mRNA-1  | Japonica | NA       |               |              | OsR498G0305897100.01.T01 |                                                                        |
| augustus_masked-3-processed-gene-156.55-mRNA-1 | Japonica | NA       |               | Os03g0336900 | OsR498G0305902200.01.T01 | Transcription repressor                                                |
| augustus_masked-3-processed-gene-156.60-mRNA-1 | Japonica | NA       |               | Os03g0339100 | OsR498G0305907700.01.T06 | PP1/PP2A phosphatases pleiotropic regulator PRL1                       |
| augustus_masked-3-processed-gene-156.69-mRNA-1 | Japonica | NA       |               |              | OsR498G0305907400.01.T01 |                                                                        |
| augustus_masked-3-processed-gene-157.0-mRNA-1  | Japonica | NA       |               |              | OsR498G0305908100.01.T01 | Papain fold toxin 1 (Glutamine deamidase) of polymorphic toxin system  |
| augustus_masked-3-processed-gene-160.5-mRNA-1  | Japonica | Indica   |               | Os03g0346200 | OsR498G0305934000.01.T01 | Flowering-promoting factor 1-like protein 5                            |
| augustus_masked-3-processed-gene-162.64-mRNA-1 | Japonica | NA       |               | Os03g0351800 | OsR498G0305953600.01.T03 | RING-type E3 ubiquitin transferase                                     |
| augustus_masked-3-processed-gene-169.13-mRNA-1 | Japonica | NA       |               | Os03g0356400 | OsR498G0305969100.01.T01 | Glutaredoxin family protein, expressed                                 |
| augustus_masked-3-processed-gene-169.6-mRNA-1  | Japonica | NA       |               | Os03g0355100 | OsR498G0305965400.01.T02 |                                                                        |
| augustus_masked-3-processed-gene-171.26-mRNA-1 | Japonica | NA       |               | Os03g0356900 | OsR498G0305981500.01.T01 | Isopentenyl transferase IPT2                                           |
| augustus_masked-3-processed-gene-171.33-mRNA-1 | Japonica | NA       |               |              | OsR498G0305979400.01.T01 |                                                                        |
| augustus_masked-3-processed-gene-172.18-mRNA-1 | Japonica | NA       |               |              | OsR498G0305982900.01.T01 | Non-specific serine/threonine protein kinase                           |
| augustus_masked-3-processed-gene-172.42-mRNA-1 | Japonica | Indica   |               | Os03g0356900 | OsR498G0305987200.01.T01 | Isopentenyl transferase IPT2                                           |
| augustus_masked-3-processed-gene-175.39-mRNA-1 | Japonica | NA       |               | Os03g0360600 | OsR498G0305990700.01.T01 | Transcription termination factor MTEF1, chloroplastic                  |
| augustus_masked-3-processed-gene-177.41-mRNA-1 | Japonica | NA       |               | Os03g0363800 | OsR498G0305999700.01.T01 | Serine/arginine rich splicing factor                                   |
| augustus_masked-3-processed-gene-177.48-mRNA-1 | Japonica | NA       |               | Os03g0363700 | OsR498G0305999600.01.T05 | Transferase, transferring glycosyl groups                              |
| augustus_masked-3-processed-gene-178.42-mRNA-1 | Japonica | NA       |               | Os03g0366100 | OsR498G0306007200.01.T01 |                                                                        |
| augustus_masked-3-processed-gene-178.43-mRNA-1 | Japonica | Japonica |               | Os03g0366800 | OsR498G0306009000.01.T01 | F-box domain containing protein                                        |
| augustus_masked-3-processed-gene-178.46-mRNA-1 | Japonica | NA       |               |              |                          | OB domain-containing protein (Fragment)                                |
| augustus_masked-3-processed-gene-179.28-mRNA-1 | Japonica | NA       |               |              | OsR498G0306012100.01.T01 | F-box domain-containing protein                                        |
| augustus_masked-3-processed-gene-18.0-mRNA-1   | Japonica | Indica   |               | Os03g0136500 | OsR498G0305190100.01.T01 | Peptide methionine sulfoxide reductase MrsB                            |
| augustus_masked-3-processed-gene-18.13-mRNA-1  | Japonica | NA       |               | Os03g0137400 | OsR498G0305193900.01.T01 | Calcium-dependent channel                                              |
| augustus_masked-3-processed-gene-18.4-mRNA-1   | Japonica | NA       |               | Os03g0136400 | OsR498G0305190000.01.T01 | H(+)/Pi cotransporter                                                  |
| augustus_masked-3-processed-gene-180.37-mRNA-1 | Japonica | NA       |               | Os03g0369700 |                          | Pentatricopeptide repeat-containing protein mitochondrial              |
| augustus_masked-3-processed-gene-180.38-mRNA-1 | Japonica | NA       |               | Os03g0370000 | OsR498G0306019700.01.T02 | Protein-serine/threonine kinase                                        |
| augustus_masked-3-processed-gene-180.41-mRNA-1 | Japonica | NA       |               | Os03g0370500 | OsR498G0306021700.01.T01 | PUA domain-containing protein (Fragment)                               |
| augustus_masked-3-processed-gene-180.42-mRNA-1 | Japonica | Japonica |               | Os03g0370800 | OsR498G0408541500.01.T01 | Copper transporter                                                     |
| augustus_masked-3-processed-gene-181.2-mRNA-1  | Japonica | NA       |               | Os03g0371600 |                          |                                                                        |
| augustus_masked-3-processed-gene-182.28-mRNA-1 | Japonica | NA       |               | Os03g0372900 | OsR498G0306031300.01.T01 | F-box domain containing protein, expressed                             |
| augustus_masked-3-processed-gene-185.16-mRNA-1 | Japonica | NA       |               |              |                          |                                                                        |
| augustus_masked-3-processed-gene-185.17-mRNA-1 | Japonica | NA       |               |              | OsR498G0204046800.01.T01 | Epstein-Barr virus EBNA-1-like                                         |
| augustus_masked-3-processed-gene-188.16-mRNA-1 | Japonica | NA       |               | Os03g0386000 | OsR498G0306062300.01.T03 | Putative WD repeat-containing protein C2A9.03                          |
| augustus_masked-3-processed-gene-189.10-mRNA-1 | Japonica | Indica   |               | Os03g0387300 | OsR498G0306070300.01.T01 | VQ motif family protein, expressed                                     |
| augustus_masked-3-processed-gene-189.11-mRNA-1 | Japonica | NA       |               |              | OsR498G0306071900.01.T01 |                                                                        |
| augustus_masked-3-processed-gene-19.0-mRNA-1   | Japonica | NA       |               | Os03g0138200 | OsR498G0305198900.01.T01 | Cytochrome P450 family 96 subfamily A polypeptide 1                    |

|                                                |          |          |               |              |                          |                                                                    |
|------------------------------------------------|----------|----------|---------------|--------------|--------------------------|--------------------------------------------------------------------|
| augustus_masked-3-processed-gene-19.1-mRNA-1   | Japonica | NA       |               | Os03g0138400 | OsR498G0305199100.01.T02 |                                                                    |
| augustus_masked-3-processed-gene-19.14-mRNA-1  | Japonica | NA       |               | Os03g0139000 | OsR498G0305201100.01.T01 |                                                                    |
| augustus_masked-3-processed-gene-19.16-mRNA-1  | Japonica | NA       |               | Os03g0139300 | OsR498G0305202300.01.T01 |                                                                    |
| augustus_masked-3-processed-gene-19.17-mRNA-1  | Japonica | Indica   |               | Os03g0140100 | OsR498G0305203100.01.T01 | Cytochrome P450 family 96 subfamily A polypeptide 1                |
| augustus_masked-3-processed-gene-19.19-mRNA-1  | Japonica | Indica   |               | Os03g0140100 | OsR498G0305203500.01.T01 | Cytochrome P450 family 96 subfamily A polypeptide 1                |
| augustus_masked-3-processed-gene-19.22-mRNA-1  | Japonica | NA       |               | Os03g0140100 | OsR498G0305205100.01.T01 | Cytochrome P450 family 96 subfamily A polypeptide 1                |
| augustus_masked-3-processed-gene-192.16-mRNA-1 | Japonica | NA       |               | Os03g0391700 | OsR498G0306087800.01.T02 | Putative HLH DNA-binding domain superfamily protein isoform 1      |
| augustus_masked-3-processed-gene-197.14-mRNA-1 | Japonica | NA       |               | Os03g0398600 | OsR498G0306118900.01.T01 | RING-H2 finger protein ATL3                                        |
| augustus_masked-3-processed-gene-197.15-mRNA-1 | Japonica | NA       |               | Os03g0399000 | OsR498G0306119900.01.T01 | Pectinesterase                                                     |
| augustus_masked-3-processed-gene-197.16-mRNA-1 | Japonica | NA       |               | Os03g0399000 | OsR498G0306119900.01.T01 | Pectinesterase                                                     |
| augustus_masked-3-processed-gene-198.9-mRNA-1  | Japonica | NA       |               | Os03g0399400 | OsR498G0306121800.01.T01 | F-box only protein 13                                              |
| augustus_masked-3-processed-gene-2.58-mRNA-1   | Japonica | NA       |               |              |                          | Skp1 family, dimerisation domain containing protein, expressed     |
| augustus_masked-3-processed-gene-2.66-mRNA-1   | Japonica | NA       |               | Os03g0107700 |                          | Cyclin-dependent protein kinase inhibitor EL2                      |
| augustus_masked-3-processed-gene-20.20-mRNA-1  | Japonica | Indica   |               | Os03g0140100 | OsR498G0305205900.01.T01 | Cytochrome P450 family 96 subfamily A polypeptide 1                |
| augustus_masked-3-processed-gene-20.21-mRNA-1  | Japonica | Indica   |               | Os03g0140100 | OsR498G0305207300.01.T01 | Cytochrome P450 family 96 subfamily A polypeptide 1                |
| augustus_masked-3-processed-gene-20.24-mRNA-1  | Japonica | NA       |               | Os03g0140500 | OsR498G0305207800.01.T01 | Cysteine-rich repeat secretory protein 3                           |
| augustus_masked-3-processed-gene-201.3-mRNA-1  | Japonica | NA       |               |              | OsR498G0306141500.01.T01 |                                                                    |
| augustus_masked-3-processed-gene-201.5-mRNA-1  | Japonica | NA       |               |              | OsR498G0306142300.01.T01 | FLZ-type domain-containing protein                                 |
| augustus_masked-3-processed-gene-202.2-mRNA-1  | Japonica | Indica   |               | Os03g0403600 | OsR498G0306146500.01.T01 | VWFA domain-containing protein (Fragment)                          |
| augustus_masked-3-processed-gene-203.15-mRNA-1 | Japonica | NA       |               |              | OsR498G0815762600.01.T01 |                                                                    |
| augustus_masked-3-processed-gene-209.28-mRNA-1 | Japonica | NA       |               |              | OsR498G0306205600.01.T01 | Zinc finger protein WIP2 (Fragment)                                |
| augustus_masked-3-processed-gene-209.29-mRNA-1 | Japonica | NA       |               | Os12g0135200 | OsR498G1220897500.01.T01 | F-box/kelch-repeat protein At5g26960                               |
| augustus_masked-3-processed-gene-21.38-mRNA-1  | Japonica | NA       |               |              | OsR498G0305216300.01.T01 | Subtilisin-like protease                                           |
| augustus_masked-3-processed-gene-210.0-mRNA-1  | Japonica | NA       |               | Os03g0415500 | OsR498G0306207300.01.T02 | Puative inner mitochondrial membrane translocase                   |
| augustus_masked-3-processed-gene-211.19-mRNA-1 | Japonica | Japonica |               | Os03g0417700 | OsR498G0306216600.01.T01 | Cytochrome P450, family 78, subfamily A, polypeptide 10 (Fragment) |
| augustus_masked-3-processed-gene-211.25-mRNA-1 | Japonica | NA       |               | Os03g0418000 | OsR498G0306219500.01.T01 | Chitinase                                                          |
| augustus_masked-3-processed-gene-211.33-mRNA-1 | Japonica | NA       |               |              | OsR498G0306220400.01.T01 |                                                                    |
| augustus_masked-3-processed-gene-212.33-mRNA-1 | Japonica | NA       |               |              | OsR498G0306226600.01.T01 |                                                                    |
| augustus_masked-3-processed-gene-213.12-mRNA-1 | Japonica | NA       |               | Os03g0423000 | OsR498G0306236100.01.T02 | F-box domain containing protein, expressed                         |
| augustus_masked-3-processed-gene-213.29-mRNA-1 | Japonica | Indica   |               | Os03g0423300 | OsR498G0306236800.01.T02 | Acyl-[acyl-carrier-protein] desaturase 4, chloroplastic            |
| augustus_masked-3-processed-gene-213.6-mRNA-1  | Japonica | Japonica |               | Os03g0422300 | OsR498G1120568600.01.T01 |                                                                    |
| augustus_masked-3-processed-gene-215.23-mRNA-1 | Japonica | NA       |               | Os03g0425900 |                          | Zinc finger protein ZAT4                                           |
| augustus_masked-3-processed-gene-215.25-mRNA-1 | Japonica | Indica   | Kinase-TM     | Os03g0426300 | OsR498G0306245800.01.T01 | G-type lectin 5-receptor-like serine/threonine-protein kinase      |
| augustus_masked-3-processed-gene-216.18-mRNA-1 | Japonica | NA       |               | Os03g0426800 | OsR498G0306246300.01.T03 | Membrane-anchored ubiquitin-fold protein 1                         |
| augustus_masked-3-processed-gene-216.22-mRNA-1 | Japonica | NA       |               | Os03g0427000 | OsR498G0306247200.01.T03 | EID1-like F-box protein 2 isoform C                                |
| augustus_masked-3-processed-gene-216.23-mRNA-1 | Japonica | NA       |               | Os03g0427100 | OsR498G0306247800.01.T02 | RING/U-box superfamily protein isoform 1                           |
| augustus_masked-3-processed-gene-217.19-mRNA-1 | Japonica | NA       |               | Os03g0428700 | OsR498G0306252300.01.T01 | Expansin                                                           |
| augustus_masked-3-processed-gene-217.21-mRNA-1 | Japonica | NA       |               | Os03g0429000 | OsR498G0306253900.01.T01 | Cystatin domain-containing protein (Fragment)                      |
| augustus_masked-3-processed-gene-218.21-mRNA-1 | Japonica | NA       |               | Os02g0212975 | OsR498G0305421900.01.T01 | Kinesin heavy chain-like                                           |
| augustus_masked-3-processed-gene-218.24-mRNA-1 | Japonica | NA       |               | Os10g0460000 | OsR498G0204348500.01.T01 |                                                                    |
| augustus_masked-3-processed-gene-218.4-mRNA-1  | Japonica | NA       |               | Os03g0430500 | OsR498G0306258700.01.T01 | Subtilisin-like protease                                           |
| augustus_masked-3-processed-gene-22.19-mRNA-1  | Japonica | NA       |               |              | OsR498G1120638300.01.T05 |                                                                    |
| augustus_masked-3-processed-gene-22.21-mRNA-1  | Japonica | NA       |               | Os03g0144300 | OsR498G0305219500.01.T02 | Xyloglucan galactosyltransferase KATAMARI                          |
| augustus_masked-3-processed-gene-22.22-mRNA-1  | Japonica | Indica   |               | Os03g0144500 | OsR498G0305220100.01.T01 | Exostosin domain-containing protein (Fragment)                     |
| augustus_masked-3-processed-gene-22.25-mRNA-1  | Japonica | NA       |               | Os03g0144800 | OsR498G0305220900.01.T03 | Xyloglucan galactosyltransferase KATAMARI                          |
| augustus_masked-3-processed-gene-22.39-mRNA-1  | Japonica | NA       | Kinase-LRR-TM | Os03g0145000 | OsR498G0305221600.01.T01 | Leucine-rich repeat receptor-like protein kinase PXL2              |
| augustus_masked-3-processed-gene-220.10-mRNA-1 | Japonica | NA       |               | Os03g0433200 | OsR498G0306272800.01.T01 | GRAS transcription factor                                          |
| augustus_masked-3-processed-gene-222.22-mRNA-1 | Japonica | NA       |               | Os03g0437100 | OsR498G0306284800.01.T01 | Zinc finger protein 1                                              |
| augustus_masked-3-processed-gene-222.23-mRNA-1 | Japonica | Japonica |               | Os03g0437200 | OsR498G0306284800.01.T01 | Zinc finger protein 1                                              |
| augustus_masked-3-processed-gene-222.8-mRNA-1  | Japonica | NA       |               | Os03g0435900 | OsR498G0306281600.01.T01 | Mitotic-spindle organizing protein 1A                              |
| augustus_masked-3-processed-gene-222.9-mRNA-1  | Japonica | Japonica |               | Os03g0436400 | OsR498G0714710500.01.T01 | 3-oxo-Delta(45)-steroid 5-beta-reductase                           |
| augustus_masked-3-processed-gene-223.16-mRNA-1 | Japonica | NA       |               | Os03g0439000 | OsR498G0306291900.01.T01 | Zinc finger CCCH domain-containing protein 18                      |
| augustus_masked-3-processed-gene-224.44-mRNA-1 | Japonica | NA       |               |              |                          |                                                                    |
| augustus_masked-3-processed-gene-224.45-mRNA-1 | Japonica | NA       |               |              |                          |                                                                    |
| augustus_masked-3-processed-gene-225.5-mRNA-1  | Japonica | NA       |               | Os03g0441400 | OsR498G0306299200.01.T05 | Pentatricopeptide repeat-containing protein, chloroplastic         |
| augustus_masked-3-processed-gene-225.6-mRNA-1  | Japonica | NA       |               | Os03g0441500 | OsR498G0306299600.01.T03 | ABC transporter family protein, expressed                          |
| augustus_masked-3-processed-gene-226.0-mRNA-1  | Japonica | NA       |               |              | OsR498G0204046800.01.T01 | Epstein-Barr virus EBNA-1-like                                     |
| augustus_masked-3-processed-gene-227.7-mRNA-1  | Japonica | Indica   |               | Os03g0444900 | OsR498G0306310300.01.T02 | WRKY DNA binding domain containing protein, expressed              |
| augustus_masked-3-processed-gene-23.1-mRNA-1   | Japonica | NA       |               |              | OsR498G0305222300.01.T01 | Beta-glucuronosyltransferase GlcAT14A                              |
| augustus_masked-3-processed-gene-23.8-mRNA-1   | Japonica | NA       |               | Os03g0145600 |                          | Zinc finger CCCH domain-containing protein 48                      |
| augustus_masked-3-processed-gene-232.9-mRNA-1  | Japonica | NA       |               |              | OsR498G0306330400.01.T01 |                                                                    |

|                                                |          |          |           |              |                          |                                                            |
|------------------------------------------------|----------|----------|-----------|--------------|--------------------------|------------------------------------------------------------|
| augustus_masked-3-processed-gene-24.47-mRNA-1  | Japonica | Japonica |           | Os03g0148400 | OsR498G0305233000.01.T02 | Leucine-rich repeat-containing protein 16B-like            |
| augustus_masked-3-processed-gene-25.1-mRNA-1   | Japonica | NA       |           | Os03g0149000 | OsR498G0305234100.01.T01 | LOB transcription factor                                   |
| augustus_masked-3-processed-gene-25.19-mRNA-1  | Japonica | Japonica |           | Os03g0150500 | OsR498G0305239100.01.T01 | H(+)/Pi cotransporter                                      |
| augustus_masked-3-processed-gene-25.2-mRNA-1   | Japonica | NA       |           | Os03g0149000 | OsR498G0305234100.01.T01 | LOB domain-containing protein 29                           |
| augustus_masked-3-processed-gene-25.30-mRNA-1  | Japonica | NA       |           | Os03g0149700 | OsR498G0305237600.01.T01 | Ring-h2 finger protein atf51                               |
| augustus_masked-3-processed-gene-25.31-mRNA-1  | Japonica | NA       |           | Os03g0149800 | OsR498G0305237800.01.T01 | RING-H2 finger protein ATL16                               |
| augustus_masked-3-processed-gene-26.8-mRNA-1   | Japonica | Indica   |           | Os03g0150600 | OsR498G0305239400.01.T01 | H(+)/Pi cotransporter                                      |
| augustus_masked-3-processed-gene-26.9-mRNA-1   | Japonica | NA       |           | Os03g0150800 | OsR498G0305240200.01.T01 | H(+)/Pi cotransporter                                      |
| augustus_masked-3-processed-gene-265.19-mRNA-1 | Japonica | NA       |           | Os10g0427000 | OsR498G1018762100.01.T01 | BTB/POZ domain containing protein, expressed               |
| augustus_masked-3-processed-gene-265.30-mRNA-1 | Japonica | NA       |           | Os10g0426600 | OsR498G1018761700.01.T01 | BTB/POZ domain containing protein, expressed               |
| augustus_masked-3-processed-gene-265.31-mRNA-1 | Japonica | NA       |           | Os10g0426500 | OsR498G1018758400.01.T01 | BTB/POZ and MATH domain-containing protein 1               |
| augustus_masked-3-processed-gene-265.45-mRNA-1 | Japonica | NA       |           |              | OsR498G1018686900.01.T02 | Exonuclease family protein, expressed                      |
| augustus_masked-3-processed-gene-265.50-mRNA-1 | Japonica | NA       |           | Os10g0425700 |                          | BTB/POZ and MATH domain-containing protein 2               |
| augustus_masked-3-processed-gene-266.16-mRNA-1 | Japonica | NA       |           | Os10g0423800 | OsR498G1018750800.01.T01 | BTB/POZ and MATH domain-containing protein 2               |
| augustus_masked-3-processed-gene-266.25-mRNA-1 | Japonica | NA       |           | Os10g0424500 | OsR498G1018753900.01.T01 | BTB domain-containing protein                              |
| augustus_masked-3-processed-gene-266.26-mRNA-1 | Japonica | NA       |           | Os10g0424100 | OsR498G1018753500.01.T01 | BTB domain-containing protein (Fragment)                   |
| augustus_masked-3-processed-gene-266.27-mRNA-1 | Japonica | NA       |           | Os10g0424100 | OsR498G1018753500.01.T01 | BTB/POZ and MATH domain-containing protein 2               |
| augustus_masked-3-processed-gene-266.28-mRNA-1 | Japonica | NA       |           | Os10g0423900 |                          | BTB/POZ domain containing protein, expressed               |
| augustus_masked-3-processed-gene-266.4-mRNA-1  | Japonica | NA       |           | Os10g0425400 | OsR498G1018754900.01.T01 | BTB domain-containing protein                              |
| augustus_masked-3-processed-gene-267.17-mRNA-1 | Japonica | NA       |           | Os10g0423000 | OsR498G1018750400.01.T03 | Ribosomal N-lysine methyltransferase 5                     |
| augustus_masked-3-processed-gene-267.25-mRNA-1 | Japonica | NA       |           | Os10g0423300 | OsR498G1018750800.01.T01 | BTB/POZ and MATH domain-containing protein 1               |
| augustus_masked-3-processed-gene-267.27-mRNA-1 | Japonica | Japonica |           | Os10g0422800 | OsR498G0307042100.01.T01 |                                                            |
| augustus_masked-3-processed-gene-267.31-mRNA-1 | Japonica | NA       |           | Os10g0422600 | OsR498G1018748200.01.T01 | Zf-FLZ domain containing protein                           |
| augustus_masked-3-processed-gene-268.1-mRNA-1  | Japonica | NA       |           | Os10g0421800 | OsR498G1018744600.01.T05 | Pentatricopeptide repeat-containing protein, chloroplastic |
| augustus_masked-3-processed-gene-269.38-mRNA-1 | Japonica | NA       |           |              |                          | EGF-like domain-containing protein                         |
| augustus_masked-3-processed-gene-27.13-mRNA-1  | Japonica | NA       |           | Os03g0154000 | OsR498G0305247900.01.T01 | FAD binding domain containing protein, expressed           |
| augustus_masked-3-processed-gene-27.15-mRNA-1  | Japonica | Indica   |           | Os11g0602400 | OsR498G0305248300.01.T01 | tRNA-intron lyase                                          |
| augustus_masked-3-processed-gene-27.35-mRNA-1  | Japonica | Japonica |           | Os03g0153400 | OsR498G0916883200.01.T02 | SufE domain-containing protein (Fragment)                  |
| augustus_masked-3-processed-gene-27.36-mRNA-1  | Japonica | NA       |           |              | OsR498G0305247600.01.T01 |                                                            |
| augustus_masked-3-processed-gene-270.0-mRNA-1  | Japonica | NA       |           |              |                          | Ribonuclease 3                                             |
| augustus_masked-3-processed-gene-270.1-mRNA-1  | Japonica | NA       |           |              | OsR498G1018732200.01.T01 | Calcium-transporting ATPase                                |
| augustus_masked-3-processed-gene-271.1-mRNA-1  | Japonica | NA       |           |              | OsR498G1018724200.01.T01 | Leucine Rich Repeat family protein                         |
| augustus_masked-3-processed-gene-271.10-mRNA-1 | Japonica | NA       |           | Os10g0416500 | OsR498G1018723700.01.T01 | Class III chitinase                                        |
| augustus_masked-3-processed-gene-271.17-mRNA-1 | Japonica | NA       |           | Os10g0416200 | OsR498G1018721400.01.T01 | Very-long-chain 3-oxoacyl-CoA synthase                     |
| augustus_masked-3-processed-gene-271.8-mRNA-1  | Japonica | NA       |           | Os10g0416800 | OsR498G1018725300.01.T01 | Class III chitinase                                        |
| augustus_masked-3-processed-gene-272.25-mRNA-1 | Japonica | NA       |           | Os10g0415200 | OsR498G1018718400.01.T02 | Exocyst complex component                                  |
| augustus_masked-3-processed-gene-272.58-mRNA-1 | Japonica | NA       |           | Os10g0460000 | OsR498G0305421900.01.T01 |                                                            |
| augustus_masked-3-processed-gene-273.1-mRNA-1  | Japonica | NA       |           |              |                          |                                                            |
| augustus_masked-3-processed-gene-273.7-mRNA-1  | Japonica | NA       |           | Os10g0412800 | OsR498G1018709700.01.T05 |                                                            |
| augustus_masked-3-processed-gene-278.41-mRNA-1 | Japonica | NA       |           |              |                          | Inorganic diphosphatase                                    |
| augustus_masked-3-processed-gene-279.21-mRNA-1 | Japonica | NA       |           |              |                          |                                                            |
| augustus_masked-3-processed-gene-284.46-mRNA-1 | Japonica | NA       |           | Os10g0396100 | OsR498G1018645800.01.T01 | F-box domain containing protein, expressed                 |
| augustus_masked-3-processed-gene-288.33-mRNA-1 | Japonica | NA       |           | Os10g0390000 | OsR498G1018626000.01.T01 |                                                            |
| augustus_masked-3-processed-gene-288.39-mRNA-1 | Japonica | NA       |           | Os10g0389500 | OsR498G1018624000.01.T04 |                                                            |
| augustus_masked-3-processed-gene-289.25-mRNA-1 | Japonica | NA       |           | Os10g0388200 | OsR498G1018620600.01.T01 | F-box/kelch-repeat protein SKIP30                          |
| augustus_masked-3-processed-gene-289.48-mRNA-1 | Japonica | NA       | Kinase    | Os09g0376600 | OsR498G1018618100.01.T01 | Putative leucine-rich repeat receptor-like protein kinase  |
| augustus_masked-3-processed-gene-29.12-mRNA-1  | Japonica | NA       |           | Os03g0158000 | OsR498G1221887800.01.T01 |                                                            |
| augustus_masked-3-processed-gene-29.18-mRNA-1  | Japonica | Japonica |           | Os03g0158900 | OsR498G0307003200.01.T01 | Pentatricopeptide repeat-containing protein                |
| augustus_masked-3-processed-gene-29.19-mRNA-1  | Japonica | NA       | Kinase-TM | Os03g0159100 | OsR498G0305257900.01.T01 | probable serine/threonine-protein kinase PBL16             |
| augustus_masked-3-processed-gene-29.23-mRNA-1  | Japonica | NA       |           | Os03g0160200 | OsR498G0305260700.01.T02 | Ribosomal N-lysine methyltransferase 5                     |
| augustus_masked-3-processed-gene-29.3-mRNA-1   | Japonica | NA       |           |              | OsR498G0307316800.01.T01 | Putative Anter-specific proline-rich protein APG           |
| augustus_masked-3-processed-gene-29.33-mRNA-1  | Japonica | NA       |           | Os03g0159400 | OsR498G0305258600.01.T01 | Transcription repressor                                    |
| augustus_masked-3-processed-gene-29.36-mRNA-1  | Japonica | Indica   |           | Os03g0159900 | OsR498G0305260000.01.T02 |                                                            |
| augustus_masked-3-processed-gene-290.8-mRNA-1  | Japonica | NA       |           | Os10g0386300 |                          |                                                            |
| augustus_masked-3-processed-gene-293.17-mRNA-1 | Japonica | NA       |           |              | OsR498G1221194600.01.T01 | BKRF1 encodes EBNA-1 protein-like                          |
| augustus_masked-3-processed-gene-294.27-mRNA-1 | Japonica | NA       |           | Os10g0380800 | OsR498G1018593600.01.T01 | Tyrosine decarboxylase                                     |
| augustus_masked-3-processed-gene-295.7-mRNA-1  | Japonica | NA       |           |              | OsR498G0305652000.01.T01 | SR-rich pre-mRNA splicing activator                        |
| augustus_masked-3-processed-gene-296.8-mRNA-1  | Japonica | NA       |           | Os10g0378400 | OsR498G1018586600.01.T01 | IRK-interacting protein-like                               |
| augustus_masked-3-processed-gene-297.22-mRNA-1 | Japonica | NA       |           | Os10g0377400 | OsR498G1018583800.01.T03 | Ras-related protein RGP1                                   |
| augustus_masked-3-processed-gene-30.19-mRNA-1  | Japonica | Japonica |           | Os03g0160300 | OsR498G0307042100.01.T01 | Major facilitator superfamily protein isoform 1            |
| augustus_masked-3-processed-gene-30.22-mRNA-1  | Japonica | Indica   |           | Os03g0160900 | OsR498G0305261800.01.T04 |                                                            |

|                                                |          |          |            |              |                          |                                                                           |
|------------------------------------------------|----------|----------|------------|--------------|--------------------------|---------------------------------------------------------------------------|
| augustus_masked-3-processed-gene-309.6-mRNA-1  | Japonica | NA       | NBS-TM     |              |                          | Disease resistance protein RPM1                                           |
| augustus_masked-3-processed-gene-31.40-mRNA-1  | Japonica | NA       |            | Os03g0162500 | OsR498G0305274100.01.T01 | Plant-specific domain TIGR01615 family protein                            |
| augustus_masked-3-processed-gene-312.2-mRNA-1  | Japonica | NA       |            | Os10g0349300 | OsR498G1018517600.01.T01 | Cortical cell-delineating protein-like                                    |
| augustus_masked-3-processed-gene-312.3-mRNA-1  | Japonica | NA       |            | Os10g0349300 | OsR498G1018517000.01.T01 | Cortical cell delineating protein, putative, expressed                    |
| augustus_masked-3-processed-gene-312.4-mRNA-1  | Japonica | NA       |            | Os10g0349300 | OsR498G1018516600.01.T01 | Cortical cell delineating protein, putative, expressed                    |
| augustus_masked-3-processed-gene-32.2-mRNA-1   | Japonica | NA       |            | Os03g0163500 | OsR498G0305276900.01.T02 | Exocyst complex component                                                 |
| augustus_masked-3-processed-gene-32.8-mRNA-1   | Japonica | NA       |            | Os03g0164300 | OsR498G0305279700.01.T02 | TF-B3 domain-containing protein                                           |
| augustus_masked-3-processed-gene-321.20-mRNA-1 | Japonica | NA       |            | Os10g0337700 | OsR498G1018481900.01.T01 | WPP domain-containing protein                                             |
| augustus_masked-3-processed-gene-321.7-mRNA-1  | Japonica | NA       |            | Os10g0338500 |                          | E3 ubiquitin-protein ligase SPL11                                         |
| augustus_masked-3-processed-gene-325.8-mRNA-1  | Japonica | NA       |            | Os10g0327000 | OsR498G1018449400.01.T03 | cysteine-rich repeat secretory protein 38-like isoform X3                 |
| augustus_masked-3-processed-gene-326.30-mRNA-1 | Japonica | NA       |            |              | OsR498G1018455500.01.T01 | WRKY transcription factor 18                                              |
| augustus_masked-3-processed-gene-326.31-mRNA-1 | Japonica | NA       |            | Os10g0328100 | OsR498G0101190400.01.T03 | HDOD domain protein                                                       |
| augustus_masked-3-processed-gene-33.21-mRNA-1  | Japonica | NA       |            | Os03g0166000 | OsR498G0305285000.01.T04 | Alba domain-containing protein (Fragment)                                 |
| augustus_masked-3-processed-gene-332.10-mRNA-1 | Japonica | NA       |            |              | OsR498G0306342800.01.T01 | Embryo defective 2016                                                     |
| augustus_masked-3-processed-gene-334.0-mRNA-1  | Japonica | NA       | Kinase-TM  | Os03g0556600 | OsR498G0306350500.01.T01 | Non-specific serine/threonine protein kinase                              |
| augustus_masked-3-processed-gene-334.22-mRNA-1 | Japonica | NA       |            |              |                          |                                                                           |
| augustus_masked-3-processed-gene-336.16-mRNA-1 | Japonica | NA       |            | Os03g0559700 | OsR498G0306366400.01.T01 | HTH myb-type domain-containing protein                                    |
| augustus_masked-3-processed-gene-336.3-mRNA-1  | Japonica | NA       |            | Os03g0558700 |                          | HTH myb-type domain-containing protein                                    |
| augustus_masked-3-processed-gene-338.27-mRNA-1 | Japonica | NA       |            | Os03g0562200 | OsR498G0306377600.01.T01 | F-box domain containing protein expressed                                 |
| augustus_masked-3-processed-gene-34.24-mRNA-1  | Japonica | NA       |            | Os03g0168400 | OsR498G0305292300.01.T06 | Pentatricopeptide repeat-containing protein                               |
| augustus_masked-3-processed-gene-34.39-mRNA-1  | Japonica | NA       |            |              | OsR498G0305293000.01.T01 | Pentatricopeptide repeat                                                  |
| augustus_masked-3-processed-gene-34.41-mRNA-1  | Japonica | NA       |            | Os03g0168700 | OsR498G0305293400.01.T01 | SET and MYND domain-containing protein 3                                  |
| augustus_masked-3-processed-gene-340.16-mRNA-1 | Japonica | Japonica |            | Os03g0564600 | OsR498G0306388200.01.T01 | Cysteine-rich repeat secretory protein 38                                 |
| augustus_masked-3-processed-gene-341.23-mRNA-1 | Japonica | NA       | LRR-NBS-TM | Os03g0566700 |                          | NBS-LRR protein (Fragment)                                                |
| augustus_masked-3-processed-gene-341.24-mRNA-1 | Japonica | NA       |            | Os03g0566800 | OsR498G0306397400.01.T01 | Eukaryotic translation initiation factor                                  |
| augustus_masked-3-processed-gene-341.26-mRNA-1 | Japonica | NA       |            | Os03g0567100 | OsR498G0306398000.01.T01 |                                                                           |
| augustus_masked-3-processed-gene-342.28-mRNA-1 | Japonica | NA       |            | Os03g0568433 |                          | 4-hydroxyphenylacetaldehyde oxime monooxygenase                           |
| augustus_masked-3-processed-gene-342.29-mRNA-1 | Japonica | Japonica |            | Os03g0568466 | OsR498G0306401700.01.T01 | 4-hydroxyphenylacetaldehyde oxime monooxygenase                           |
| augustus_masked-3-processed-gene-342.30-mRNA-1 | Japonica | NA       |            | Os03g0568600 | OsR498G0306402100.01.T01 | tRNA-uridine aminocarboxypropyltransferase                                |
| augustus_masked-3-processed-gene-343.29-mRNA-1 | Japonica | NA       |            | Os03g0569900 | OsR498G0306409400.01.T02 | polyadenylate-binding protein RBP45-like isoform X4                       |
| augustus_masked-3-processed-gene-343.30-mRNA-1 | Japonica | Indica   |            | Os03g0570100 | OsR498G0306410000.01.T01 | Tyrosine N-monooxygenase                                                  |
| augustus_masked-3-processed-gene-343.8-mRNA-1  | Japonica | NA       |            | Os03g0569800 | OsR498G0306408900.01.T01 | Putative membrane-associated salt-inducible protein                       |
| augustus_masked-3-processed-gene-348.16-mRNA-1 | Japonica | Indica   |            | Os03g0578500 | OsR498G0306438900.01.T01 | Myosin-2                                                                  |
| augustus_masked-3-processed-gene-348.27-mRNA-1 | Japonica | NA       |            |              | OsR498G0100073600.01.T01 |                                                                           |
| augustus_masked-3-processed-gene-35.11-mRNA-1  | Japonica | Indica   |            | Os04g0286500 | OsR498G0305295200.01.T01 | Transposon protein, putative, Pong sub-class, expressed                   |
| augustus_masked-3-processed-gene-35.2-mRNA-1   | Japonica | NA       |            | Os03g0169300 | OsR498G0305295300.01.T01 | Pentatricopeptide repeat-containing protein chloroplastic                 |
| augustus_masked-3-processed-gene-35.26-mRNA-1  | Japonica | Indica   | Kinase-TM  | Os10g0405100 | OsR498G0305298200.01.T01 | probable serine/threonine-protein kinase PBL3                             |
| augustus_masked-3-processed-gene-35.27-mRNA-1  | Japonica | NA       |            | Os03g0170500 | OsR498G0305299000.01.T01 | NAD(P)-linked oxidoreductase superfamily protein isoform 1                |
| augustus_masked-3-processed-gene-36.18-mRNA-1  | Japonica | NA       |            | Os03g0171600 | OsR498G0305304300.01.T05 | F-box/kelch-repeat protein SKIP11                                         |
| augustus_masked-3-processed-gene-36.42-mRNA-1  | Japonica | Indica   |            | Os03g0172400 | OsR498G0305306800.01.T01 | Cysteine proteinase inhibitor                                             |
| augustus_masked-3-processed-gene-36.43-mRNA-1  | Japonica | Japonica |            | Os03g0172400 | OsR498G0305307000.01.T01 | Cysteine proteinase inhibitor                                             |
| augustus_masked-3-processed-gene-374.10-mRNA-1 | Japonica | NA       |            | Os03g0624300 | OsR498G0306587700.01.T01 |                                                                           |
| augustus_masked-3-processed-gene-374.21-mRNA-1 | Japonica | NA       |            | Os03g0624800 | OsR498G0306589900.01.T06 | Putative methyltransferase PMT9                                           |
| augustus_masked-3-processed-gene-376.15-mRNA-1 | Japonica | NA       |            | Os03g0627500 | OsR498G0306600500.01.T02 | Nucleic acid binding protein                                              |
| augustus_masked-3-processed-gene-376.9-mRNA-1  | Japonica | NA       |            | Os06g0114366 | OsR498G0612361200.01.T01 | Selenium-binding protein-like                                             |
| augustus_masked-3-processed-gene-38.39-mRNA-1  | Japonica | NA       |            |              | OsR498G0305810200.01.T01 |                                                                           |
| augustus_masked-3-processed-gene-38.45-mRNA-1  | Japonica | NA       |            |              | OsR498G0305314600.01.T01 |                                                                           |
| augustus_masked-3-processed-gene-38.46-mRNA-1  | Japonica | NA       |            | Os03g0175800 |                          |                                                                           |
| augustus_masked-3-processed-gene-38.66-mRNA-1  | Japonica | NA       |            | Os03g0176900 | OsR498G0305319400.01.T01 | Phosphatidylserine decarboxylase beta chain like                          |
| augustus_masked-3-processed-gene-38.68-mRNA-1  | Japonica | NA       |            |              | OsR498G0305320600.01.T01 |                                                                           |
| augustus_masked-3-processed-gene-381.22-mRNA-1 | Japonica | NA       | LRR-TM     | Os03g0637600 | OsR498G0306623400.01.T01 | Leucine-rich repeat extensin-like protein 6                               |
| augustus_masked-3-processed-gene-381.26-mRNA-1 | Japonica | NA       |            | Os03g0637800 | OsR498G0306624300.01.T01 | Serine/threonine-protein kinase-like protein CR4                          |
| augustus_masked-3-processed-gene-381.27-mRNA-1 | Japonica | NA       | Kinase-TM  | Os03g0637800 | OsR498G0306624300.01.T01 | Receptor protein kinase CRINKLY4                                          |
| augustus_masked-3-processed-gene-382.18-mRNA-1 | Japonica | NA       |            | Os03g0638900 | OsR498G0306629400.01.T01 | F-box domain containing protein expressed                                 |
| augustus_masked-3-processed-gene-382.26-mRNA-1 | Japonica | Japonica |            | Os03g0639400 | OsR498G0306635200.01.T01 | PMEI domain-containing protein                                            |
| augustus_masked-3-processed-gene-386.29-mRNA-1 | Japonica | Japonica |            | Os03g0645900 | OsR498G1222114300.01.T01 | Plastid 9-cis-epoxycarotenoid dioxygenase                                 |
| augustus_masked-3-processed-gene-387.30-mRNA-1 | Japonica | NA       |            | Os03g0646300 | OsR498G0306664500.01.T01 | Cyclic nucleotide-gated ion channel 8                                     |
| augustus_masked-3-processed-gene-387.36-mRNA-1 | Japonica | NA       |            | Os03g0646200 |                          | PORR domain-containing protein (Fragment)                                 |
| augustus_masked-3-processed-gene-388.27-mRNA-1 | Japonica | NA       |            | Os03g0648100 | OsR498G0306669800.01.T03 | Core-2/l-branching beta-16-N-acetylglucosaminyltransferase family protein |
| augustus_masked-3-processed-gene-388.48-mRNA-1 | Japonica | Japonica |            | Os03g0648800 | OsR498G0306671600.01.T01 | Glutaredoxin domain-containing cysteine-rich protein 1                    |
| augustus_masked-3-processed-gene-39.56-mRNA-1  | Japonica | NA       |            |              |                          | Germin-like protein 3-1                                                   |

|                                                 |          |          |               |              |                          |                                                                        |
|-------------------------------------------------|----------|----------|---------------|--------------|--------------------------|------------------------------------------------------------------------|
| augustus_masked-3-processed-gene-39.57-mRNA-1   | Japonica | NA       |               | Os03g0179200 | OsR498G0305324900.01.T01 | Cupin type-1 domain-containing protein                                 |
| augustus_masked-3-processed-gene-39.75-mRNA-1   | Japonica | NA       |               | Os03g0180000 | OsR498G0305327800.01.T01 | Sodium/calcium exchanger membrane region                               |
| augustus_masked-3-processed-gene-39.1.1-mRNA-1  | Japonica | NA       |               |              | OsR498G0306689300.01.T01 | F-box domain-containing protein (Fragment)                             |
| augustus_masked-3-processed-gene-39.2.2-mRNA-1  | Japonica | NA       |               | Os03g0654400 | OsR498G0306693800.01.T01 | Amino acid permease family protein, expressed                          |
| augustus_masked-3-processed-gene-4.59-mRNA-1    | Japonica | NA       |               |              | OsR498G0305104500.01.T01 | Modular polyketide synthase (Fragment)                                 |
| augustus_masked-3-processed-gene-4.66-mRNA-1    | Japonica | NA       |               | Os03g0111000 |                          |                                                                        |
| augustus_masked-3-processed-gene-40.12-mRNA-1   | Japonica | NA       |               | Os03g0181100 | OsR498G0305331700.01.T01 | Tify domain-containing protein (Fragment)                              |
| augustus_masked-3-processed-gene-40.14-mRNA-1   | Japonica | NA       |               | Os03g0181400 | OsR498G0305333100.01.T01 | PORR domain-containing protein (Fragment)                              |
| augustus_masked-3-processed-gene-40.28-mRNA-1   | Japonica | NA       |               |              | OsR498G0511427100.01.T01 | Epstein-Barr virus EBNA-1-like                                         |
| augustus_masked-3-processed-gene-40.24-mRNA-1   | Japonica | Indica   |               | Os03g0673100 | OsR498G0306772900.01.T01 |                                                                        |
| augustus_masked-3-processed-gene-40.30-mRNA-1   | Japonica | NA       |               |              |                          |                                                                        |
| augustus_masked-3-processed-gene-40.4.32-mRNA-1 | Japonica | NA       |               | Os03g0676400 | OsR498G0306781800.01.T01 | VQ domain-containing protein (Fragment)                                |
| augustus_masked-3-processed-gene-40.4.6-mRNA-1  | Japonica | NA       |               | Os02g0770700 | OsR498G0612483600.01.T01 | Separase                                                               |
| augustus_masked-3-processed-gene-40.5.19-mRNA-1 | Japonica | NA       | CC-Kinase-TM  | Os03g0678100 | OsR498G0306787500.01.T01 | Serine/threonine-protein kinase blus1                                  |
| augustus_masked-3-processed-gene-40.6.25-mRNA-1 | Japonica | Japonica |               | Os03g0678800 | OsR498G0305988900.01.T01 | Hexosyltransferase                                                     |
| augustus_masked-3-processed-gene-40.8.19-mRNA-1 | Japonica | NA       |               |              | OsR498G0306808200.01.T01 | PAZ domain-containing protein/Piwi domain-containing protein/DUF1785 d |
| augustus_masked-3-processed-gene-40.9.26-mRNA-1 | Japonica | Japonica |               | Os03g0683300 | OsR498G1019231300.01.T01 | rRNA N-glycosidase                                                     |
| augustus_masked-3-processed-gene-40.9.27-mRNA-1 | Japonica | NA       |               | Os01g0240700 | OsR498G0100514900.01.T01 | DUF1618 domain-containing protein (Fragment)                           |
| augustus_masked-3-processed-gene-40.9.7-mRNA-1  | Japonica | NA       |               |              | OsR498G0306810100.01.T01 | Agmatine coumaroyltransferase-2                                        |
| augustus_masked-3-processed-gene-41.18-mRNA-1   | Japonica | NA       | Kinase-LRR-TM | Os03g0183800 | OsR498G0305342500.01.T01 | Strubbelig-receptor family 6                                           |
| augustus_masked-3-processed-gene-41.19-mRNA-1   | Japonica | NA       |               | Os03g0184000 | OsR498G0305342900.01.T03 | 15-cis-phytoene desaturase, chloroplastic/chromoplastic                |
| augustus_masked-3-processed-gene-41.1.5-mRNA-1  | Japonica | Indica   |               | Os06g0488200 | OsR498G0306819800.01.T02 | Myosin family protein with Dil domain isoform 1                        |
| augustus_masked-3-processed-gene-41.2.41-mRNA-1 | Japonica | Indica   |               | Os03g0689800 | OsR498G0306832100.01.T01 | NB-ARC domain containing protein                                       |
| augustus_masked-3-processed-gene-41.3.0-mRNA-1  | Japonica | NA       |               | Os03g0690500 | OsR498G0306837400.01.T01 | 2-oxoglutarate-dependent oxygenase                                     |
| augustus_masked-3-processed-gene-41.4.46-mRNA-1 | Japonica | NA       |               |              | OsR498G0306849600.01.T02 | DUF538 domain-containing protein                                       |
| augustus_masked-3-processed-gene-41.4.47-mRNA-1 | Japonica | NA       |               |              | OsR498G0306849600.01.T01 |                                                                        |
| augustus_masked-3-processed-gene-41.5.15-mRNA-1 | Japonica | NA       |               | Os03g0694800 | OsR498G0306856500.01.T03 | 50S ribosomal protein L18, cyanelle                                    |
| augustus_masked-3-processed-gene-41.5.2-mRNA-1  | Japonica | NA       |               | Os03g0693400 | OsR498G0306851600.01.T02 |                                                                        |
| augustus_masked-3-processed-gene-41.5.3-mRNA-1  | Japonica | NA       |               | Os03g0693700 | OsR498G0306853200.01.T01 | Oxalate oxidase 2                                                      |
| augustus_masked-3-processed-gene-41.5.31-mRNA-1 | Japonica | NA       | LRR-TM        |              | OsR498G0306857800.01.T01 | Putative LRR receptor-like protein kinase                              |
| augustus_masked-3-processed-gene-41.5.5-mRNA-1  | Japonica | NA       |               | Os03g0693900 | OsR498G0306854600.01.T01 | Oxalate oxidase 2                                                      |
| augustus_masked-3-processed-gene-41.7.12-mRNA-1 | Japonica | NA       |               | Os03g0698800 | OsR498G0306869300.01.T05 | Zinc finger CCCH domain-containing protein 24                          |
| augustus_masked-3-processed-gene-41.8.28-mRNA-1 | Japonica | Indica   |               | Os07g0196700 | OsR498G0306874200.01.T01 | NAC domain-containing protein                                          |
| augustus_masked-3-processed-gene-41.9.57-mRNA-1 | Japonica | NA       |               | Os03g0702500 | OsR498G0306882500.01.T01 | Glycosyltransferase                                                    |
| augustus_masked-3-processed-gene-41.9.59-mRNA-1 | Japonica | NA       |               | Os03g0702800 | OsR498G0306884100.01.T02 | Eukaryotic peptide chain release factor subunit 1-3                    |
| augustus_masked-3-processed-gene-41.9.67-mRNA-1 | Japonica | NA       |               |              | OsR498G0306883000.01.T01 | Histone acetyltransferase of the MYST family 1 isoform 1               |
| augustus_masked-3-processed-gene-41.9.73-mRNA-1 | Japonica | NA       |               |              | OsR498G0306885000.01.T06 | Protein kinase domain-containing protein                               |
| augustus_masked-3-processed-gene-42.16-mRNA-1   | Japonica | Japonica |               | Os03g0185000 | OsR498G0305393200.01.T01 | Serine O-acetyltransferase                                             |
| augustus_masked-3-processed-gene-42.32-mRNA-1   | Japonica | NA       |               | Os03g0185200 | OsR498G0305348400.01.T05 | Pentatricopeptide repeat-containing protein DOT4, chloroplastic        |
| augustus_masked-3-processed-gene-42.34-mRNA-1   | Japonica | NA       |               | Os03g0185700 | OsR498G0305349200.01.T01 | Agmatine coumaroyltransferase-2                                        |
| augustus_masked-3-processed-gene-42.1.0-mRNA-1  | Japonica | Japonica |               | Os03g0705433 | OsR498G0306891900.01.T01 | Putative transcription factor RL9                                      |
| augustus_masked-3-processed-gene-42.1.1-mRNA-1  | Japonica | NA       |               |              |                          | ATP-dependent helicase                                                 |
| augustus_masked-3-processed-gene-42.1.12-mRNA-1 | Japonica | NA       |               | Os03g0706500 | OsR498G0306897300.01.T01 | Transcription factor TEOSINTE BRANCHED 1                               |
| augustus_masked-3-processed-gene-42.2.40-mRNA-1 | Japonica | NA       |               | Os03g0707600 | OsR498G0306900900.01.T01 | DELLA protein RHT-1                                                    |
| augustus_masked-3-processed-gene-42.3.36-mRNA-1 | Japonica | NA       |               | Os03g0708200 | OsR498G0306904300.01.T01 | DUF295 domain-containing protein (Fragment)                            |
| augustus_masked-3-processed-gene-42.3.41-mRNA-1 | Japonica | NA       |               | Os03g0708600 | OsR498G0306905200.01.T03 | DEAD-box ATP-dependent RNA helicase                                    |
| augustus_masked-3-processed-gene-42.3.53-mRNA-1 | Japonica | Indica   |               | Os09g0552200 | OsR498G0306910900.01.T01 |                                                                        |
| augustus_masked-3-processed-gene-42.3.73-mRNA-1 | Japonica | NA       |               | Os03g0710550 |                          |                                                                        |
| augustus_masked-3-processed-gene-42.4.48-mRNA-1 | Japonica | NA       |               |              | OsR498G0306916100.01.T01 | DNA-directed RNA polymerase I subunit H                                |
| augustus_masked-3-processed-gene-42.4.55-mRNA-1 | Japonica | NA       |               |              | OsR498G0306915600.01.T02 | H15 domain-containing protein (Fragment)                               |
| augustus_masked-3-processed-gene-42.5.21-mRNA-1 | Japonica | NA       |               |              | OsR498G1221284200.01.T02 |                                                                        |
| augustus_masked-3-processed-gene-42.6.1-mRNA-1  | Japonica | Indica   | Kinase-TM     | Os03g0225100 | OsR498G0306923500.01.T01 | Mitogen-activated protein kinase kinase 7                              |
| augustus_masked-3-processed-gene-42.7.8-mRNA-1  | Japonica | NA       |               |              | OsR498G0306930000.01.T01 |                                                                        |
| augustus_masked-3-processed-gene-42.8.46-mRNA-1 | Japonica | NA       |               | Os03g0719100 | OsR498G0306943300.01.T02 | E3 SUMO-protein ligase SIZ2                                            |
| augustus_masked-3-processed-gene-42.9.9-mRNA-1  | Japonica | NA       |               | Os03g0720400 | OsR498G0306947300.01.T01 | F-box only protein 7                                                   |
| augustus_masked-3-processed-gene-43.37-mRNA-1   | Japonica | NA       |               | Os03g0186900 | OsR498G0305351700.01.T01 | Peptidase A1 domain-containing protein (Fragment)                      |
| augustus_masked-3-processed-gene-43.61-mRNA-1   | Japonica | NA       |               | Os03g0187800 | OsR498G0305357000.01.T01 | Purine permease                                                        |
| augustus_masked-3-processed-gene-43.62-mRNA-1   | Japonica | NA       |               | Os03g0188200 |                          | RING-H2 finger protein ATL3B                                           |
| augustus_masked-3-processed-gene-43.0.12-mRNA-1 | Japonica | NA       |               | Os03g0722500 | OsR498G0306957100.01.T02 | Glucan endo-1,3-beta-D-glucosidase                                     |
| augustus_masked-3-processed-gene-43.0.27-mRNA-1 | Japonica | NA       |               | Os03g0722000 |                          | Hyccin domain-containing protein (Fragment)                            |
| augustus_masked-3-processed-gene-43.1.1-mRNA-1  | Japonica | NA       |               | Os03g0723000 | OsR498G0306958900.01.T01 | Scarecrow-like protein 4                                               |

|                                                |          |        |               |              |                          |                                                            |
|------------------------------------------------|----------|--------|---------------|--------------|--------------------------|------------------------------------------------------------|
| augustus_masked-3-processed-gene-432.0-mRNA-1  | Japonica | NA     |               | Os03g0724700 | OsR498G0306965500.01.T05 | Maf-like protein, expressed                                |
| augustus_masked-3-processed-gene-433.0-mRNA-1  | Japonica | NA     |               | Os03g0726400 | OsR498G0306972700.01.T01 | Transcription initiation factor TFIID subunit 8            |
| augustus_masked-3-processed-gene-433.13-mRNA-1 | Japonica | NA     |               |              | OsR498G0306975400.01.T02 | KNOTTED1 homeodomain protein (Fragment)                    |
| augustus_masked-3-processed-gene-434.24-mRNA-1 | Japonica | NA     |               | Os03g0727800 | OsR498G0306978500.01.T01 | Protein kinase domain-containing protein                   |
| augustus_masked-3-processed-gene-434.27-mRNA-1 | Japonica | NA     |               | Os03g0728200 | OsR498G0306979100.01.T02 | Pentatricopeptide repeat                                   |
| augustus_masked-3-processed-gene-434.28-mRNA-1 | Japonica | NA     |               | Os03g0728500 | OsR498G0306979300.01.T01 | FHA domain containing protein, expressed                   |
| augustus_masked-3-processed-gene-435.43-mRNA-1 | Japonica | NA     |               | Os03g0728700 |                          |                                                            |
| augustus_masked-3-processed-gene-437.47-mRNA-1 | Japonica | Indica |               | Os03g0732100 | OsR498G0306994100.01.T01 | Homeodomain protein JUBEL1                                 |
| augustus_masked-3-processed-gene-437.59-mRNA-1 | Japonica | NA     |               | Os03g0733400 |                          | Zinc finger BED domain-containing protein DAYSLEEPER       |
| augustus_masked-3-processed-gene-438.50-mRNA-1 | Japonica | Indica |               | Os03g0734100 | OsR498G0307000500.01.T02 |                                                            |
| augustus_masked-3-processed-gene-438.62-mRNA-1 | Japonica | NA     |               | Os03g0734400 | OsR498G0307001400.01.T01 | Mitochondrial ribosomal protein L7/L12                     |
| augustus_masked-3-processed-gene-439.13-mRNA-1 | Japonica | NA     |               | Os03g0736200 | OsR498G0307006100.01.T01 | Pentatricopeptide repeat-containing protein                |
| augustus_masked-3-processed-gene-439.14-mRNA-1 | Japonica | Indica | OsSYP121      | Os03g0787000 | OsR498G0307007300.01.T01 | Syntaxin-related protein KNOLLE                            |
| augustus_masked-3-processed-gene-439.15-mRNA-1 | Japonica | NA     |               | Os03g0736600 | OsR498G0307007700.01.T01 | ATP synthase subunit delta, chloroplastic                  |
| augustus_masked-3-processed-gene-44.10-mRNA-1  | Japonica | NA     |               |              | OsR498G0305363300.01.T01 |                                                            |
| augustus_masked-3-processed-gene-44.14-mRNA-1  | Japonica | Indica |               | Os03g0189900 | OsR498G0305365900.01.T01 | VQ motif-containing protein 9                              |
| augustus_masked-3-processed-gene-44.24-mRNA-1  | Japonica | NA     |               | Os03g0189300 | OsR498G0305364200.01.T01 | Myosin heavy chain-related protein                         |
| augustus_masked-3-processed-gene-441.29-mRNA-1 | Japonica | NA     |               |              | OsR498G0307016800.01.T01 |                                                            |
| augustus_masked-3-processed-gene-441.40-mRNA-1 | Japonica | NA     |               | Os03g0741600 | OsR498G0307023100.01.T02 |                                                            |
| augustus_masked-3-processed-gene-442.43-mRNA-1 | Japonica | NA     |               |              | OsR498G0307028900.01.T04 | Methyltransferase small domain                             |
| augustus_masked-3-processed-gene-442.45-mRNA-1 | Japonica | NA     |               |              | OsR498G0202820500.01.T01 | U5 small nuclear ribonucleoprotein 200 kDa helicase        |
| augustus_masked-3-processed-gene-442.52-mRNA-1 | Japonica | NA     |               | Os03g0743650 | OsR498G0307030000.01.T01 | Retrotransposon protein, putative, Ty3-gypsy sub-class     |
| augustus_masked-3-processed-gene-444.32-mRNA-1 | Japonica | NA     |               | Os03g0746700 | OsR498G0307041400.01.T01 | Zinc finger MYM-type protein 6                             |
| augustus_masked-3-processed-gene-445.12-mRNA-1 | Japonica | NA     |               | Os03g0748000 | OsR498G0307045700.01.T01 | Evolutionarily conserved C-terminal region 2               |
| augustus_masked-3-processed-gene-446.39-mRNA-1 | Japonica | NA     |               | Os03g0749400 | OsR498G0307051300.01.T01 | Circumsporozoite protein-like protein                      |
| augustus_masked-3-processed-gene-446.45-mRNA-1 | Japonica | NA     |               | Os03g0750500 | OsR498G0307053300.01.T02 | Atrophin-1 like                                            |
| augustus_masked-3-processed-gene-448.17-mRNA-1 | Japonica | NA     |               | Os03g0753500 | OsR498G0307062200.01.T01 |                                                            |
| augustus_masked-3-processed-gene-45.19-mRNA-1  | Japonica | NA     |               | Os03g0191700 | OsR498G0305370400.01.T03 | PUM-HD domain-containing protein (Fragment)                |
| augustus_masked-3-processed-gene-45.20-mRNA-1  | Japonica | NA     |               | Os03g0191900 |                          | DRE binding factor                                         |
| augustus_masked-3-processed-gene-450.56-mRNA-1 | Japonica | NA     | Kinase-LRR-TM | Os03g0756200 | OsR498G0307070000.01.T03 | Lrr receptor-like serinethreonine-protein kinase rpk2      |
| augustus_masked-3-processed-gene-451.17-mRNA-1 | Japonica | NA     |               | Os03g0757600 | OsR498G0307074100.01.T01 | UDP-glycosyltransferase 83A1                               |
| augustus_masked-3-processed-gene-451.2-mRNA-1  | Japonica | NA     |               |              |                          | DUF591 domain-containing protein                           |
| augustus_masked-3-processed-gene-451.28-mRNA-1 | Japonica | NA     |               | Os03g0757100 | OsR498G0307073200.01.T01 | UDP-glycosyltransferase 83A1                               |
| augustus_masked-3-processed-gene-452.58-mRNA-1 | Japonica | NA     |               |              | OsR498G0307081900.01.T01 |                                                            |
| augustus_masked-3-processed-gene-452.60-mRNA-1 | Japonica | Indica |               | Os03g0759700 | OsR498G0307082900.01.T01 | BHLH transcription factor (Fragment)                       |
| augustus_masked-3-processed-gene-452.62-mRNA-1 | Japonica | NA     |               | Os03g0760000 | OsR498G0307083700.01.T02 | Isoflavone 2'-hydroxylase                                  |
| augustus_masked-3-processed-gene-452.65-mRNA-1 | Japonica | NA     |               | Os03g0760100 | OsR498G0307084100.01.T01 |                                                            |
| augustus_masked-3-processed-gene-453.47-mRNA-1 | Japonica | NA     |               | Os03g0760900 |                          |                                                            |
| augustus_masked-3-processed-gene-453.48-mRNA-1 | Japonica | NA     |               | Os03g0761300 | OsR498G0307086900.01.T01 | Pentatricopeptide repeat-containing protein, mitochondrial |
| augustus_masked-3-processed-gene-453.78-mRNA-1 | Japonica | NA     |               | Os03g0761500 | OsR498G0307087600.01.T01 | Subtilisin-like protease                                   |
| augustus_masked-3-processed-gene-453.81-mRNA-1 | Japonica | NA     |               | Os03g0762700 | OsR498G0307092400.01.T01 | Transcriptional regulator of RNA polII SAGA subunit        |
| augustus_masked-3-processed-gene-454.49-mRNA-1 | Japonica | NA     |               | Os03g0764100 |                          | Zinc finger transcription factor ZF1                       |
| augustus_masked-3-processed-gene-454.52-mRNA-1 | Japonica | NA     |               |              | OsR498G0511427100.01.T01 | Epstein-Barr virus EBNA-1-like                             |
| augustus_masked-3-processed-gene-455.35-mRNA-1 | Japonica | NA     |               | Os03g0764900 | OsR498G0307100600.01.T01 | Dof zinc finger protein like                               |
| augustus_masked-3-processed-gene-455.39-mRNA-1 | Japonica | NA     |               | Os03g0765800 | OsR498G0307104500.01.T01 | Molybdenum cofactor sulfurase                              |
| augustus_masked-3-processed-gene-456.26-mRNA-1 | Japonica | NA     |               | Os03g0766900 | OsR498G0307107500.01.T04 | Proteasome assembly chaperone 2                            |
| augustus_masked-3-processed-gene-456.33-mRNA-1 | Japonica | NA     |               | Os03g0767000 | OsR498G0307107800.01.T01 | Allene oxide synthase chloroplastic                        |
| augustus_masked-3-processed-gene-456.40-mRNA-1 | Japonica | NA     |               | Os03g0768900 |                          |                                                            |
| augustus_masked-3-processed-gene-456.47-mRNA-1 | Japonica | NA     |               | Os03g0767700 |                          | Pentatricopeptide repeat-containing protein, mitochondrial |
| augustus_masked-3-processed-gene-457.23-mRNA-1 | Japonica | NA     |               | Os03g0769900 | OsR498G0307115300.01.T01 | BSD domain-containing protein                              |
| augustus_masked-3-processed-gene-458.45-mRNA-1 | Japonica | Indica | Kinase-TM     | Os03g0772600 | OsR498G0307124500.01.T01 | Lectin protein kinase, putative, expressed                 |
| augustus_masked-3-processed-gene-458.51-mRNA-1 | Japonica | Indica | Kinase        | Os04g0531500 | OsR498G0307125400.01.T01 | Non-specific serine/threonine protein kinase               |
| augustus_masked-3-processed-gene-458.53-mRNA-1 | Japonica | NA     |               | Os03g0772900 | OsR498G0307126600.01.T01 | DUF862 domain-containing protein                           |
| augustus_masked-3-processed-gene-46.58-mRNA-1  | Japonica | NA     |               | Os03g0193000 | OsR498G0305375300.01.T05 | GRAS domain-containing protein (Fragment)                  |
| augustus_masked-3-processed-gene-460.12-mRNA-1 | Japonica | NA     |               | Os03g0775400 |                          | Pentatricopeptide repeat                                   |
| augustus_masked-3-processed-gene-460.35-mRNA-1 | Japonica | NA     |               | Os03g0776400 | OsR498G0307139600.01.T01 |                                                            |
| augustus_masked-3-processed-gene-461.14-mRNA-1 | Japonica | NA     |               | Os03g0778400 | OsR498G0307149500.01.T01 | Keratinocyte proline-rich protein                          |
| augustus_masked-3-processed-gene-461.26-mRNA-1 | Japonica | NA     |               |              | OsR498G0307150200.01.T01 | DUF295 domain-containing protein                           |
| augustus_masked-3-processed-gene-462.9-mRNA-1  | Japonica | NA     |               |              | OsR498G0511427100.01.T01 | Epstein-Barr virus EBNA-1-like                             |
| augustus_masked-3-processed-gene-463.16-mRNA-1 | Japonica | NA     |               | Os03g0783100 |                          |                                                            |
| augustus_masked-3-processed-gene-463.19-mRNA-1 | Japonica | Indica |               | Os03g0783100 | OsR498G0307161100.01.T01 | Sentrin-specific protease 7 (Fragment)                     |

|                                                 |          |          |           |              |                          |                                                                                |
|-------------------------------------------------|----------|----------|-----------|--------------|--------------------------|--------------------------------------------------------------------------------|
| augustus_masked-3-processed-gene-463.29-mRNA-1  | Japonica | NA       |           | Os03g0784000 | OsR498G0307165900.01.T08 | Amine oxidase, putative, expressed                                             |
| augustus_masked-3-processed-gene-464.23-mRNA-1  | Japonica | NA       |           |              |                          |                                                                                |
| augustus_masked-3-processed-gene-465.44-mRNA-1  | Japonica | NA       |           | Os03g0786600 | OsR498G0307172600.01.T01 | PORR domain-containing protein (Fragment)                                      |
| augustus_masked-3-processed-gene-465.50-mRNA-1  | Japonica | NA       |           | Os03g0788100 | OsR498G0307176100.01.T01 | RING-H2 finger protein ATL71                                                   |
| augustus_masked-3-processed-gene-466.1-mRNA-1   | Japonica | NA       |           | Os03g0788300 | OsR498G0307176700.01.T02 | Nuclear pore complex protein NUP1                                              |
| augustus_masked-3-processed-gene-466.8-mRNA-1   | Japonica | NA       |           | Os03g0788600 | OsR498G0307177200.01.T01 | Fasciclin-like arabinogalactan protein 16                                      |
| augustus_masked-3-processed-gene-467.46-mRNA-1  | Japonica | NA       |           | Os03g0790500 | OsR498G0307182700.01.T01 | probable carboxylesterase 15                                                   |
| augustus_masked-3-processed-gene-467.64-mRNA-1  | Japonica | NA       |           | Os03g0791600 |                          |                                                                                |
| augustus_masked-3-processed-gene-468.20-mRNA-1  | Japonica | NA       |           | Os03g0794000 | OsR498G0307194900.01.T01 | AAI domain-containing protein (Fragment)                                       |
| augustus_masked-3-processed-gene-468.30-mRNA-1  | Japonica | NA       |           | Os03g0793000 | OsR498G0307191600.01.T01 | Zinc finger AN1 domain-containing stress-associated protein 14                 |
| augustus_masked-3-processed-gene-468.9-mRNA-1   | Japonica | NA       |           |              | OsR498G0307189200.01.T01 | DUF295 domain-containing protein (Fragment)                                    |
| augustus_masked-3-processed-gene-469.46-mRNA-1  | Japonica | NA       |           | Os03g0795200 | OsR498G0307197700.01.T01 | Pentatricopeptide repeat-containing protein chloroplastic                      |
| augustus_masked-3-processed-gene-469.62-mRNA-1  | Japonica | NA       |           |              | OsR498G0307200200.01.T01 | F-box domain-containing protein                                                |
| augustus_masked-3-processed-gene-469.63-mRNA-1  | Japonica | Japonica |           | Os03g0796100 | OsR498G0511251800.01.T01 | F-box domain-containing protein (Fragment)                                     |
| augustus_masked-3-processed-gene-47.0-mRNA-1    | Japonica | NA       |           | Os05g0548200 |                          | TFIIB-type domain-containing protein                                           |
| augustus_masked-3-processed-gene-47.1-mRNA-1    | Japonica | NA       |           | Os03g0193700 |                          | Geranylgeranyl transferase type-2 subunit beta                                 |
| augustus_masked-3-processed-gene-47.15-mRNA-1   | Japonica | NA       |           |              | OsR498G0511460800.01.T01 |                                                                                |
| augustus_masked-3-processed-gene-47.16-mRNA-1   | Japonica | NA       |           | Os03g0194100 | OsR498G0305379000.01.T04 | C2 calcium-dependent membrane targeting                                        |
| augustus_masked-3-processed-gene-47.17-mRNA-1   | Japonica | NA       |           | Os03g0194300 | OsR498G0305379200.01.T01 | Cytochrome b561 and DOMON domain-containing protein                            |
| augustus_masked-3-processed-gene-47.6-mRNA-1    | Japonica | NA       |           | Os03g0194600 | OsR498G0305379700.01.T02 | DOMON domain-containing protein (Fragment)                                     |
| augustus_masked-3-processed-gene-470.39-mRNA-1  | Japonica | NA       |           | Os03g0797600 | OsR498G0307212100.01.T04 | Transcription factor UNE12                                                     |
| augustus_masked-3-processed-gene-470.48-mRNA-1  | Japonica | NA       |           | Os03g0797000 | OsR498G0307209000.01.T03 | Tryptophan synthase                                                            |
| augustus_masked-3-processed-gene-471.32-mRNA-1  | Japonica | Japonica |           | Os03g0798400 | OsR498G0307023100.01.T02 |                                                                                |
| augustus_masked-3-processed-gene-472.55-mRNA-1  | Japonica | Indica   |           | Os03g0800000 | OsR498G0307220700.01.T01 | Nodulin-like domain-containing protein (Fragment)                              |
| augustus_masked-3-processed-gene-472.78-mRNA-1  | Japonica | NA       |           | Os03g0801350 | OsR498G0307223000.01.T01 |                                                                                |
| augustus_masked-3-processed-gene-473.14-mRNA-1  | Japonica | Japonica |           | Os03g0802500 | OsR498G0713673300.01.T01 | Adenosinetriphosphatase                                                        |
| augustus_masked-3-processed-gene-473.17-mRNA-1  | Japonica | Indica   |           | Os03g0802600 | OsR498G0307226500.01.T01 | Adenosinetriphosphatase                                                        |
| augustus_masked-3-processed-gene-473.3-mRNA-1   | Japonica | NA       |           | Os03g0802150 | OsR498G0307225100.01.T01 | DUF295 domain-containing protein (Fragment)                                    |
| augustus_masked-3-processed-gene-473.4-mRNA-1   | Japonica | Japonica |           | Os03g0802200 | OsR498G0102093100.01.T01 | Cysteine-rich transmembrane CYSTM domain containing protein                    |
| augustus_masked-3-processed-gene-476.34-mRNA-1  | Japonica | NA       |           | Os03g0809000 | OsR498G0307249200.01.T01 | Dirigent protein 15                                                            |
| augustus_masked-3-processed-gene-477.48-mRNA-1  | Japonica | NA       |           | Os03g0810100 | OsR498G0307251700.01.T01 | Adenylate isopentenyltransferase                                               |
| augustus_masked-3-processed-gene-477.57-mRNA-1  | Japonica | NA       |           |              | OsR498G0307253600.01.T01 |                                                                                |
| augustus_masked-3-processed-gene-478.0-mRNA-1   | Japonica | NA       |           |              |                          | DUF591 domain-containing protein                                               |
| augustus_masked-3-processed-gene-478.19-mRNA-1  | Japonica | NA       |           | Os03g0811800 | OsR498G0307258000.01.T01 | Ribosomal protein (Fragment)                                                   |
| augustus_masked-3-processed-gene-478.8-mRNA-1   | Japonica | NA       |           | Os03g0811700 | OsR498G0307257700.01.T01 | RRM domain-containing protein (Fragment)                                       |
| augustus_masked-3-processed-gene-48.14-mRNA-1   | Japonica | NA       |           | Os03g0196250 | OsR498G0305387400.01.T01 | Putative metal ion binding protein                                             |
| augustus_masked-3-processed-gene-48.15-mRNA-1   | Japonica | Indica   |           | Os02g0316200 | OsR498G0305390400.01.T01 | F-box/kelch-repeat protein OR23                                                |
| augustus_masked-3-processed-gene-48.16-mRNA-1   | Japonica | NA       |           | Os03g0196500 | OsR498G0305391600.01.T01 | F-box protein SNE                                                              |
| augustus_masked-3-processed-gene-48.17-mRNA-1   | Japonica | NA       |           | Os03g0196600 | OsR498G0305393200.01.T01 | Serine O-acetyltransferase                                                     |
| augustus_masked-3-processed-gene-48.9-mRNA-1    | Japonica | NA       |           |              | OsR498G0305389700.01.T02 | X8 domain-containing protein                                                   |
| augustus_masked-3-processed-gene-480.66-mRNA-1  | Japonica | NA       |           | Os03g0815800 | OsR498G0307268600.01.T01 | Ethylene-responsive transcription factor CRF3                                  |
| augustus_masked-3-processed-gene-481.1-mRNA-1   | Japonica | NA       |           | Os03g0817200 | OsR498G0307275500.01.T01 | Lysine histidine transporter 1                                                 |
| augustus_masked-3-processed-gene-482.11-mRNA-1  | Japonica | NA       |           | Os03g0820100 | OsR498G0307285100.01.T04 | NEDD8-activating enzyme E1 regulatory subunit                                  |
| augustus_masked-3-processed-gene-482.15-mRNA-1  | Japonica | NA       |           | Os03g0820600 | OsR498G0307286500.01.T01 | Actin-depolymerizing factor                                                    |
| augustus_masked-3-processed-gene-483.47-mRNA-1  | Japonica | NA       | Kinase-TM | Os03g0821900 | OsR498G0307292500.01.T01 | Protein kinase APK1A chloroplastic                                             |
| augustus_masked-3-processed-gene-483.53-mRNA-1  | Japonica | NA       |           | Os03g0822900 |                          | HAT family dimerisation domain containing protein, expressed                   |
| augustus_masked-3-processed-gene-483.63-mRNA-1  | Japonica | NA       |           | Os03g0821700 | OsR498G0307291800.01.T01 | Putative tetra-tricopeptide-like helical domain, DYW domain-containing protein |
| augustus_masked-3-processed-gene-484.15-mRNA-1  | Japonica | Japonica |           | Os03g0824600 | OsR498G0307299700.01.T01 | DIMBOA UDP-glucosyltransferase BX8                                             |
| augustus_masked-3-processed-gene-484.2-mRNA-1   | Japonica | Indica   |           | Os03g0823400 | OsR498G0307296200.01.T01 | Bowman-Birk type trypsin inhibitor                                             |
| augustus_masked-3-processed-gene-484.21-mRNA-1  | Japonica | NA       |           | Os03g0823700 | OsR498G0307297400.01.T01 | Ras-related protein Rab-11A                                                    |
| augustus_masked-3-processed-gene-484.25-mRNA-1  | Japonica | Indica   |           | Os03g0824000 | OsR498G0307298400.01.T02 | Mitotic-spindle organizing protein 1A                                          |
| augustus_masked-3-processed-gene-485.64-mRNA-1  | Japonica | NA       |           | Os03g0826500 | OsR498G0307305400.01.T01 | Anthranyl synthase alpha subunit 1, chloroplastic                              |
| augustus_masked-3-processed-gene-486.14-mRNA-1  | Japonica | NA       | Kinase-TM | Os03g0828800 | OsR498G0307310600.01.T02 | Dual specificity testis-specific protein kinase 2                              |
| augustus_masked-3-processed-gene-486.29-mRNA-1  | Japonica | NA       |           | Os03g0829600 | OsR498G0307312600.01.T01 | PMEI domain-containing protein (Fragment)                                      |
| augustus_masked-3-processed-gene-490.33-mRNA-1  | Japonica | NA       | Kinase-TM | Os03g0838100 | OsR498G0307339000.01.T02 | Non-specific serine/threonine protein kinase (Fragment)                        |
| augustus_masked-3-processed-gene-491.47-mRNA-1  | Japonica | NA       |           | Os03g0839400 |                          |                                                                                |
| augustus_masked-3-processed-gene-491.50-mRNA-1  | Japonica | NA       |           | Os03g0839800 |                          |                                                                                |
| augustus_masked-3-processed-gene-492.101-mRNA-1 | Japonica | NA       |           | Os03g0843300 | OsR498G0307353000.01.T03 | Salt tolerance protein I                                                       |
| augustus_masked-3-processed-gene-492.63-mRNA-1  | Japonica | NA       |           |              | OsR498G0307346400.01.T01 | SANT domain-containing protein                                                 |
| augustus_masked-3-processed-gene-493.61-mRNA-1  | Japonica | NA       |           | Os03g0843700 |                          |                                                                                |
| augustus_masked-3-processed-gene-493.78-mRNA-1  | Japonica | NA       |           | Os03g0845100 |                          | Transposon protein, putative, Mutator sub-class                                |



|                                                |          |          |           |              |                          |                                                                                                 |
|------------------------------------------------|----------|----------|-----------|--------------|--------------------------|-------------------------------------------------------------------------------------------------|
| augustus_masked-3-processed-gene-494.16-mRNA-1 | Japonica | NA       |           |              | OsR498G0307363000.01.T01 |                                                                                                 |
| augustus_masked-3-processed-gene-494.5-mRNA-1  | Japonica | NA       |           | Os03g0845600 | OsR498G0307359400.01.T01 | Glucan endo-1,3-beta-D-glucosidase                                                              |
| augustus_masked-3-processed-gene-496.24-mRNA-1 | Japonica | NA       |           | Os03g0850300 | OsR498G0307370800.01.T02 | SAM domain-containing protein (Fragment)                                                        |
| augustus_masked-3-processed-gene-496.26-mRNA-1 | Japonica | NA       |           | Os03g0850700 | OsR498G0307373200.01.T01 | Polyphosphoinositide binding protein Ssh2p                                                      |
| augustus_masked-3-processed-gene-496.32-mRNA-1 | Japonica | NA       |           | Os03g0851300 | OsR498G0307375200.01.T01 | 26S proteasome non-ATPase regulatory subunit A                                                  |
| augustus_masked-3-processed-gene-497.11-mRNA-1 | Japonica | NA       |           | Os03g0852800 | OsR498G0307378500.01.T01 | Non-specific phospholipase                                                                      |
| augustus_masked-3-processed-gene-497.22-mRNA-1 | Japonica | NA       |           |              | OsR498G0307376800.01.T01 | Pentatricopeptide repeat                                                                        |
| augustus_masked-3-processed-gene-497.24-mRNA-1 | Japonica | NA       |           | Os03g0852400 | OsR498G0307377400.01.T01 | Amino acid adenylation domain-containing protein                                                |
| augustus_masked-3-processed-gene-497.26-mRNA-1 | Japonica | NA       |           | Os03g0852700 | OsR498G0307378000.01.T01 | Pentatricopeptide repeat-containing protein, chloroplastic                                      |
| augustus_masked-3-processed-gene-498.10-mRNA-1 | Japonica | NA       |           | Os03g0854000 |                          | Gamma-glutamylcyclotransferase family protein (Fragment)                                        |
| augustus_masked-3-processed-gene-498.22-mRNA-1 | Japonica | NA       |           | Os03g0854400 |                          | RNase III domain-containing protein (Fragment)                                                  |
| augustus_masked-3-processed-gene-498.5-mRNA-1  | Japonica | NA       |           | Os03g0853700 | OsR498G0307382200.01.T02 | GCFC domain-containing protein (Fragment)                                                       |
| augustus_masked-3-processed-gene-499.41-mRNA-1 | Japonica | NA       |           | Os03g0856000 | OsR498G0307391300.01.T01 | S-noroclaurine synthase 1                                                                       |
| augustus_masked-3-processed-gene-499.42-mRNA-1 | Japonica | Indica   |           | Os03g0856100 | OsR498G0307391500.01.T01 | Smr domain-containing protein (Fragment)                                                        |
| augustus_masked-3-processed-gene-50.6-mRNA-1   | Japonica | NA       |           | Os03g0199100 | OsR498G0305405700.01.T01 |                                                                                                 |
| augustus_masked-3-processed-gene-50.7-mRNA-1   | Japonica | NA       |           | Os03g0199300 |                          |                                                                                                 |
| augustus_masked-3-processed-gene-500.0-mRNA-1  | Japonica | NA       |           | Os03g0856700 | OsR498G0307394300.01.T01 | Gibberellin 20-oxidase                                                                          |
| augustus_masked-3-processed-gene-500.10-mRNA-1 | Japonica | NA       |           |              |                          |                                                                                                 |
| augustus_masked-3-processed-gene-500.11-mRNA-1 | Japonica | NA       |           | Os03g0857600 | OsR498G0307396700.01.T01 | SASA domain-containing protein (Fragment)                                                       |
| augustus_masked-3-processed-gene-500.21-mRNA-1 | Japonica | NA       |           | Os03g0857750 | OsR498G0307397000.01.T01 | PREDICTED                                                                                       |
| augustus_masked-3-processed-gene-500.26-mRNA-1 | Japonica | NA       |           | Os03g0858600 | OsR498G0307399000.01.T01 | Myelin-associated oligodendrocyte basic protein                                                 |
| augustus_masked-3-processed-gene-500.9-mRNA-1  | Japonica | Japonica |           | Os03g0857100 | OsR498G0307395900.01.T01 | Outer membrane autotransporter                                                                  |
| augustus_masked-3-processed-gene-501.21-mRNA-1 | Japonica | NA       |           | Os03g0860600 | OsR498G0307403900.01.T01 | Oxidoreductase, 2OG-Fe oxygenase family protein, expressed                                      |
| augustus_masked-3-processed-gene-501.3-mRNA-1  | Japonica | NA       |           | Os03g0858800 | OsR498G0307399200.01.T05 | Protein DETOXIFICATION                                                                          |
| augustus_masked-3-processed-gene-501.32-mRNA-1 | Japonica | NA       |           | Os03g0860100 | OsR498G0307401600.01.T01 | Ethylene-responsive transcription factor                                                        |
| augustus_masked-3-processed-gene-501.33-mRNA-1 | Japonica | NA       |           |              | OsR498G0408884400.01.T03 | Epstein-Barr virus EBNA-1-like                                                                  |
| augustus_masked-3-processed-gene-501.34-mRNA-1 | Japonica | NA       |           |              | OsR498G0204046800.01.T01 | Epstein-Barr virus EBNA-1-like                                                                  |
| augustus_masked-3-processed-gene-501.36-mRNA-1 | Japonica | NA       |           |              | OsR498G0307403800.01.T02 | Dilute domain-containing protein                                                                |
| augustus_masked-3-processed-gene-502.11-mRNA-1 | Japonica | NA       |           | Os10g0531750 | OsR498G0408675500.01.T01 | Retrotransposon protein, putative, Ty3-gypsy sub-class                                          |
| augustus_masked-3-processed-gene-502.4-mRNA-1  | Japonica | NA       |           | Os03g0861000 |                          |                                                                                                 |
| augustus_masked-3-processed-gene-51.76-mRNA-1  | Japonica | NA       |           |              | OsR498G0305416200.01.T01 | Retrotransposon protein, putative, LINE subclass                                                |
| augustus_masked-3-processed-gene-52.21-mRNA-1  | Japonica | Japonica |           | Os03g0204201 | OsR498G0408675500.01.T01 | Retrotransposon protein, putative, Ty3-gypsy sub-class                                          |
| augustus_masked-3-processed-gene-53.17-mRNA-1  | Japonica | NA       |           | Os03g0206100 | OsR498G0305428000.01.T03 | Protein SNOWY COTYLEDON 3                                                                       |
| augustus_masked-3-processed-gene-54.18-mRNA-1  | Japonica | NA       |           | Os03g0208600 | OsR498G0305434900.01.T01 | Pentatricopeptide repeat                                                                        |
| augustus_masked-3-processed-gene-55.10-mRNA-1  | Japonica | NA       |           | Os03g0209600 | OsR498G0305438500.01.T05 | Methionyl-tRNA synthetase                                                                       |
| augustus_masked-3-processed-gene-55.12-mRNA-1  | Japonica | Indica   |           | Os03g0209700 | OsR498G0305438700.01.T04 | Rho GTPase-activating protein REN1-like                                                         |
| augustus_masked-3-processed-gene-55.24-mRNA-1  | Japonica | Indica   |           | Os03g0210200 | OsR498G0305439800.01.T01 | Cysteine proteinase inhibitor                                                                   |
| augustus_masked-3-processed-gene-55.26-mRNA-1  | Japonica | NA       |           |              | OsR498G0305440400.01.T01 | Myosin heavy chain                                                                              |
| augustus_masked-3-processed-gene-55.28-mRNA-1  | Japonica | Indica   |           | Os03g0210600 | OsR498G0305441000.01.T01 | Nodulin-related protein 1                                                                       |
| augustus_masked-3-processed-gene-56.11-mRNA-1  | Japonica | NA       |           |              | OsR498G0305443800.01.T01 |                                                                                                 |
| augustus_masked-3-processed-gene-56.17-mRNA-1  | Japonica | Japonica |           | Os03g0212000 | OsR498G0305445700.01.T01 | Glycosyltransferase                                                                             |
| augustus_masked-3-processed-gene-56.2-mRNA-1   | Japonica | NA       |           | Os03g0211400 | OsR498G0305443500.01.T02 | Plant calmodulin-binding protein-related                                                        |
| augustus_masked-3-processed-gene-56.9-mRNA-1   | Japonica | NA       |           | Os03g0211200 |                          |                                                                                                 |
| augustus_masked-3-processed-gene-57.51-mRNA-1  | Japonica | Indica   |           | Os03g0213200 | OsR498G0305448900.01.T03 | Stellacyanin                                                                                    |
| augustus_masked-3-processed-gene-57.72-mRNA-1  | Japonica | NA       |           |              | OsR498G0305450200.01.T07 |                                                                                                 |
| augustus_masked-3-processed-gene-57.73-mRNA-1  | Japonica | NA       |           | Os03g0213800 | OsR498G0305450400.01.T01 | mitochondrial substrate carrier family protein E                                                |
| augustus_masked-3-processed-gene-58.35-mRNA-1  | Japonica | NA       |           | Os03g0215000 | OsR498G0305452800.01.T01 | TPT domain-containing protein                                                                   |
| augustus_masked-3-processed-gene-59.34-mRNA-1  | Japonica | NA       |           | Os03g0215900 | OsR498G0305457400.01.T01 | Putative Smr domain, tetra- and pentatricopeptide-like helical domain, pentatricopeptide repeat |
| augustus_masked-3-processed-gene-59.35-mRNA-1  | Japonica | NA       |           | Os03g0216000 | OsR498G0305457800.01.T01 | Zinc finger protein GIS                                                                         |
| augustus_masked-3-processed-gene-59.55-mRNA-1  | Japonica | NA       |           | Os03g0216500 | OsR498G0305459600.01.T01 | Delta-latroitsectotoxin-Lt1a                                                                    |
| augustus_masked-3-processed-gene-59.58-mRNA-1  | Japonica | NA       |           | Os03g0217000 |                          | Recombination protein like                                                                      |
| augustus_masked-3-processed-gene-60.14-mRNA-1  | Japonica | Japonica |           | Os03g0219500 | OsR498G0204385500.01.T01 | Uv-induced protein uvi31                                                                        |
| augustus_masked-3-processed-gene-60.21-mRNA-1  | Japonica | NA       |           | Os03g0218500 | OsR498G0305464200.01.T01 | Heat shock protein 8                                                                            |
| augustus_masked-3-processed-gene-61.13-mRNA-1  | Japonica | NA       | Kinase-TM | Os03g0221700 |                          | G-type lectin S-receptor-like serine/threonine-protein kinase                                   |
| augustus_masked-3-processed-gene-61.4-mRNA-1   | Japonica | NA       |           | Os03g0219700 | OsR498G0305467400.01.T01 | DEAD-box ATP-dependent RNA helicase                                                             |
| augustus_masked-3-processed-gene-62.20-mRNA-1  | Japonica | NA       |           |              | OsR498G0305476500.01.T01 | Caleosin                                                                                        |
| augustus_masked-3-processed-gene-62.32-mRNA-1  | Japonica | NA       |           | Os03g0223100 | OsR498G0305478400.01.T01 | Cytochrome P450 family 94 subfamily D polypeptide 2                                             |
| augustus_masked-3-processed-gene-62.4-mRNA-1   | Japonica | NA       |           | Os03g0222500 |                          | F-box domain-containing protein                                                                 |
| augustus_masked-3-processed-gene-63.50-mRNA-1  | Japonica | NA       |           | Os03g0225300 | OsR498G0305487200.01.T01 | Pentatricopeptide repeat-containing protein                                                     |
| augustus_masked-3-processed-gene-64.37-mRNA-1  | Japonica | NA       |           | Os03g0225900 | OsR498G0305488900.01.T01 | Allene oxide synthase, chloroplastic                                                            |
| augustus_masked-3-processed-gene-64.45-mRNA-1  | Japonica | NA       |           |              | OsR498G0204046800.01.T01 | Epstein-Barr virus EBNA-1-like                                                                  |

|                                                |          |          |           |              |                          |                                                                             |
|------------------------------------------------|----------|----------|-----------|--------------|--------------------------|-----------------------------------------------------------------------------|
| augustus_masked-3-processed-gene-64.51-mRNA-1  | Japonica | NA       |           |              | OsR498G0305491700.01.T01 | DNA methyl transferase5                                                     |
| augustus_masked-3-processed-gene-65.40-mRNA-1  | Japonica | NA       |           |              | OsR498G0511427100.01.T01 | Circumsporozoite protein-like                                               |
| augustus_masked-3-processed-gene-68.20-mRNA-1  | Japonica | NA       |           | Os03g0232000 | OsR498G0305516600.01.T08 | Helix-loop-helix DNA-binding domain containing protein, expressed           |
| augustus_masked-3-processed-gene-68.43-mRNA-1  | Japonica | NA       |           | Os03g0232600 | OsR498G0305520600.01.T01 | RING-type E3 ubiquitin transferase                                          |
| augustus_masked-3-processed-gene-69.20-mRNA-1  | Japonica | Japonica |           | Os03g0235200 | OsR498G0305528900.01.T01 | Pentatricopeptide repeat                                                    |
| augustus_masked-3-processed-gene-7.58-mRNA-1   | Japonica | NA       |           | Os03g0116900 | OsR498G0305123700.01.T05 | Armadillo/beta-catenin-like repeat family protein, expressed                |
| augustus_masked-3-processed-gene-70.1-mRNA-1   | Japonica | NA       |           |              | OsR498G0305531300.01.T01 | transcription factor MYB3R-3-like isoform X2                                |
| augustus_masked-3-processed-gene-71.34-mRNA-1  | Japonica | NA       |           |              | OsR498G0305536700.01.T03 | DUF775 domain-containing protein                                            |
| augustus_masked-3-processed-gene-71.40-mRNA-1  | Japonica | Indica   |           | Os03g0237950 | OsR498G0305538800.01.T01 | FAS1 domain-containing protein (Fragment)                                   |
| augustus_masked-3-processed-gene-71.55-mRNA-1  | Japonica | NA       |           | Os10g0531750 | OsR498G0408675500.01.T01 | Retrotransposon protein, putative, Ty3-gypsy sub-class                      |
| augustus_masked-3-processed-gene-71.61-mRNA-1  | Japonica | NA       |           | Os03g0239300 | OsR498G0305543200.01.T02 | Zinc finger protein 1                                                       |
| augustus_masked-3-processed-gene-72.40-mRNA-1  | Japonica | NA       |           | Os03g0240400 | OsR498G0305545900.01.T01 |                                                                             |
| augustus_masked-3-processed-gene-72.41-mRNA-1  | Japonica | NA       |           | Os03g0240800 | OsR498G0305546700.01.T01 | Small nuclear ribonucleoprotein Sm D3                                       |
| augustus_masked-3-processed-gene-72.47-mRNA-1  | Japonica | NA       |           | Os03g0240600 | OsR498G0305546400.01.T01 | RING-type E3 ubiquitin transferase                                          |
| augustus_masked-3-processed-gene-73.67-mRNA-1  | Japonica | NA       |           | Os03g0242300 | OsR498G0305550600.01.T01 |                                                                             |
| augustus_masked-3-processed-gene-73.69-mRNA-1  | Japonica | NA       |           | Os03g0242900 | OsR498G0305553400.01.T01 | Subtilisin-like serine protease 2                                           |
| augustus_masked-3-processed-gene-74.55-mRNA-1  | Japonica | Japonica |           | Os03g0243400 | OsR498G0305555400.01.T01 |                                                                             |
| augustus_masked-3-processed-gene-74.62-mRNA-1  | Japonica | NA       |           | Os03g0244200 | OsR498G0305557100.01.T01 | Thaumatococcus-like protein 1                                               |
| augustus_masked-3-processed-gene-74.64-mRNA-1  | Japonica | NA       |           |              | OsR498G0204960100.01.T01 |                                                                             |
| augustus_masked-3-processed-gene-74.75-mRNA-1  | Japonica | Indica   |           | Os03g0244950 | OsR498G0305559400.01.T01 | J domain-containing protein (Fragment)                                      |
| augustus_masked-3-processed-gene-75.42-mRNA-1  | Japonica | Indica   |           | Os06g0236300 | OsR498G0305563100.01.T01 | Protein-serine/threonine phosphatase                                        |
| augustus_masked-3-processed-gene-75.51-mRNA-1  | Japonica | NA       |           | Os03g0246100 | OsR498G0305562600.01.T01 | Glucan endo-1,3-beta-glucosidase 7                                          |
| augustus_masked-3-processed-gene-76.30-mRNA-1  | Japonica | NA       |           | Os03g0247100 | OsR498G0305567700.01.T01 | ABC transporter C family member 9                                           |
| augustus_masked-3-processed-gene-77.19-mRNA-1  | Japonica | NA       |           | Os03g0251100 |                          |                                                                             |
| augustus_masked-3-processed-gene-77.26-mRNA-1  | Japonica | NA       |           | Os03g0250400 | OsR498G0305584400.01.T01 |                                                                             |
| augustus_masked-3-processed-gene-77.4-mRNA-1   | Japonica | NA       |           | Os03g0249500 | OsR498G0305578700.01.T01 | UDP-D-glucuronate 4-epimerase 2                                             |
| augustus_masked-3-processed-gene-78.0-mRNA-1   | Japonica | NA       |           |              |                          | V-type proton ATPase subunit a                                              |
| augustus_masked-3-processed-gene-78.13-mRNA-1  | Japonica | NA       |           |              | OsR498G0305591300.01.T02 | Piwi domain containing protein, expressed                                   |
| augustus_masked-3-processed-gene-78.2-mRNA-1   | Japonica | NA       | Kinase-TM | Os03g0251700 | OsR498G0305588100.01.T01 | Serine/threonine-protein kinase PBS1                                        |
| augustus_masked-3-processed-gene-78.6-mRNA-1   | Japonica | NA       |           | Os03g0251350 | OsR498G0305586800.01.T04 | CCAAT-binding transcription factor C                                        |
| augustus_masked-3-processed-gene-79.1-mRNA-1   | Japonica | NA       | Kinase-TM | Os03g0253200 | OsR498G0305593900.01.T01 | Serine/threonine-protein kinase WAG2                                        |
| augustus_masked-3-processed-gene-79.14-mRNA-1  | Japonica | NA       |           | Os03g0254400 | OsR498G0305597100.01.T01 | Patatin                                                                     |
| augustus_masked-3-processed-gene-79.8-mRNA-1   | Japonica | NA       |           | Os03g0253500 | OsR498G0305594600.01.T10 | G-patch domain containing protein, expressed                                |
| augustus_masked-3-processed-gene-8.48-mRNA-1   | Japonica | NA       |           | Os03g0119700 | OsR498G0305132500.01.T01 | Pentatricopeptide repeat-containing protein mitochondrial                   |
| augustus_masked-3-processed-gene-8.49-mRNA-1   | Japonica | NA       |           | Os03g0119900 | OsR498G0305133100.01.T01 | Multifunctional fusion protein                                              |
| augustus_masked-3-processed-gene-8.57-mRNA-1   | Japonica | NA       |           | Os03g0119300 | OsR498G0305130200.01.T01 | Serine protease                                                             |
| augustus_masked-3-processed-gene-81.35-mRNA-1  | Japonica | NA       |           |              |                          |                                                                             |
| augustus_masked-3-processed-gene-82.29-mRNA-1  | Japonica | NA       |           | Os03g0258900 | OsR498G0305610500.01.T01 | Galactose oxidase                                                           |
| augustus_masked-3-processed-gene-82.60-mRNA-1  | Japonica | NA       |           |              | OsR498G0305615000.01.T01 |                                                                             |
| augustus_masked-3-processed-gene-83.29-mRNA-1  | Japonica | NA       |           | Os03g0261800 | OsR498G0305617800.01.T01 | The fantastic four family                                                   |
| augustus_masked-3-processed-gene-84.12-mRNA-1  | Japonica | NA       |           | Os03g0263000 | OsR498G0305623600.01.T01 | AP2 domain class transcription factor                                       |
| augustus_masked-3-processed-gene-84.2-mRNA-1   | Japonica | Indica   |           | Os03g0262900 | OsR498G0305623100.01.T01 | Vacuolar protein sorting-associated protein VPS9                            |
| augustus_masked-3-processed-gene-84.22-mRNA-1  | Japonica | NA       |           | Os03g0263900 | OsR498G0305627100.01.T01 | ATP binding microtubule motor family protein, putative isoform 1            |
| augustus_masked-3-processed-gene-84.37-mRNA-1  | Japonica | NA       |           | Os03g0264600 | OsR498G0305631000.01.T01 | Zinc finger, C2H2 type family protein, expressed                            |
| augustus_masked-3-processed-gene-84.38-mRNA-1  | Japonica | NA       |           | Os03g0264700 | OsR498G0305631200.01.T01 | BTB/POZ domain-containing protein At3g09030                                 |
| augustus_masked-3-processed-gene-85.15-mRNA-1  | Japonica | Indica   |           | Os03g0266000 | OsR498G0305635900.01.T06 | Ubiquitinyl hydrolase 1                                                     |
| augustus_masked-3-processed-gene-86.70-mRNA-1  | Japonica | NA       |           | Os03g0267200 | OsR498G0305639000.01.T01 | SHSP domain-containing protein                                              |
| augustus_masked-3-processed-gene-87.32-mRNA-1  | Japonica | NA       |           |              | OsR498G0305649500.01.T01 | Fringe protein, putative, expressed                                         |
| augustus_masked-3-processed-gene-88.1-mRNA-1   | Japonica | NA       |           | Os03g0270300 |                          |                                                                             |
| augustus_masked-3-processed-gene-88.22-mRNA-1  | Japonica | NA       |           | Os03g0271600 | OsR498G0305655100.01.T01 | RING-type E3 ubiquitin transferase                                          |
| augustus_masked-3-processed-gene-9.46-mRNA-1   | Japonica | NA       |           | Os03g0120900 | OsR498G0305138300.01.T02 | ABI3VP1 transcription factor                                                |
| augustus_masked-3-processed-gene-90.1-mRNA-1   | Japonica | NA       |           |              | OsR498G0305667700.01.T06 | Initiator binding protein1                                                  |
| augustus_masked-3-processed-gene-90.20-mRNA-1  | Japonica | NA       |           | Os03g0275500 | OsR498G0305672800.01.T02 | Epsin N-terminal domain-containing protein / clathrin assembly protein-rela |
| augustus_masked-3-processed-gene-90.9-mRNA-1   | Japonica | NA       |           | Os03g0274700 | OsR498G0305669100.01.T01 | Centrosome-associated protein CEP250                                        |
| augustus_masked-3-processed-gene-97.8-mRNA-1   | Japonica | NA       |           | Os03g0288000 | OsR498G0305724500.01.T01 | Metallothionein-like protein 1A                                             |
| augustus_masked-3-processed-gene-99.11-mRNA-1  | Japonica | NA       | Kinase-TM |              | OsR498G0305741500.01.T01 | Mitogen-activated protein kinase kinase kinase 2                            |
| augustus_masked-3-processed-gene-99.9-mRNA-1   | Japonica | Indica   |           | Os03g0292200 | OsR498G0305739900.01.T03 | Mitochondrial succinate-fumarate transporter like                           |
| augustus_masked-3-processed-gene-11.23-mRNA-1  | Japonica | NA       |           |              | OsR498G0407671900.01.T01 | Histone-glutamine methyltransferase                                         |
| augustus_masked-4-processed-gene-118.4-mRNA-1  | Japonica | NA       |           | Os07g0561900 | OsR498G0102180600.01.T01 | DUF295 domain-containing protein                                            |
| augustus_masked-4-processed-gene-120.10-mRNA-1 | Japonica | NA       |           |              | OsR498G0408305400.01.T05 | Single-stranded DNA-binding protein, mitochondrial                          |
| augustus_masked-4-processed-gene-140.52-mRNA-1 | Japonica | Japonica |           | Os04g0395700 | OsR498G0408454800.01.T02 | Histone H2A.Z-specific chaperone CHZ1 (Fragment)                            |

|                                                |          |          |               |              |                          |                                                                     |
|------------------------------------------------|----------|----------|---------------|--------------|--------------------------|---------------------------------------------------------------------|
| augustus_masked-4-processed-gene-142.8-mRNA-1  | Japonica | NA       |               |              |                          | HTH myb-type domain-containing protein                              |
| augustus_masked-4-processed-gene-143.28-mRNA-1 | Japonica | NA       |               | Os04g0398900 |                          |                                                                     |
| augustus_masked-4-processed-gene-15.18-mRNA-1  | Japonica | Indica   |               | Os04g0191800 | OsR498G0407683800.01.T05 | F-box domain-containing protein                                     |
| augustus_masked-4-processed-gene-15.6-mRNA-1   | Japonica | NA       |               | Os04g0191400 | OsR498G0407682200.01.T02 |                                                                     |
| augustus_masked-4-processed-gene-15.7-mRNA-1   | Japonica | NA       |               | Os04g0191500 |                          |                                                                     |
| augustus_masked-4-processed-gene-157.1-mRNA-1  | Japonica | NA       |               |              |                          | Transposon protein, putative, unclassified                          |
| augustus_masked-4-processed-gene-158.31-mRNA-1 | Japonica | NA       |               |              | OsR498G0408582600.01.T01 | Alba domain-containing protein                                      |
| augustus_masked-4-processed-gene-16.33-mRNA-1  | Japonica | NA       |               | Os04g0193300 |                          | F-box domain-containing protein                                     |
| augustus_masked-4-processed-gene-161.23-mRNA-1 | Japonica | NA       |               |              | OsR498G0408599200.01.T02 | Pentatricopeptide repeat-containing protein mitochondrial           |
| augustus_masked-4-processed-gene-165.41-mRNA-1 | Japonica | NA       | Kinase-TM     | Os04g0439600 | OsR498G0408622600.01.T01 | Serine/threonine-protein kinase-like protein CCR4                   |
| augustus_masked-4-processed-gene-166.28-mRNA-1 | Japonica | NA       |               | Os04g0442300 | OsR498G0408633800.01.T01 | Two-component response regulator ORR1                               |
| augustus_masked-4-processed-gene-169.50-mRNA-1 | Japonica | NA       |               | Os04g0444700 | OsR498G0408648400.01.T01 | Putative methyltransferase PMT21                                    |
| augustus_masked-4-processed-gene-169.76-mRNA-1 | Japonica | NA       |               | Os04g0446100 | OsR498G0408652800.01.T02 | Pentatricopeptide repeat-containing protein                         |
| augustus_masked-4-processed-gene-17.37-mRNA-1  | Japonica | NA       |               | Os04g0194000 | OsR498G0407697400.01.T01 | F-box domain-containing protein                                     |
| augustus_masked-4-processed-gene-17.39-mRNA-1  | Japonica | NA       |               | Os04g0194600 | OsR498G0407699600.01.T01 | TCP transcription factor                                            |
| augustus_masked-4-processed-gene-173.34-mRNA-1 | Japonica | NA       |               |              | OsR498G0408681600.01.T02 | Sugar transport protein 5                                           |
| augustus_masked-4-processed-gene-175.36-mRNA-1 | Japonica | Japonica |               | Os04g0457400 | OsR498G0204165200.01.T01 |                                                                     |
| augustus_masked-4-processed-gene-18.10-mRNA-1  | Japonica | NA       |               | Os04g0195100 | OsR498G0407700600.01.T01 | F-box domain-containing protein                                     |
| augustus_masked-4-processed-gene-182.30-mRNA-1 | Japonica | NA       |               | Os04g0472200 | OsR498G0408747800.01.T01 | FAS1 domain-containing protein                                      |
| augustus_masked-4-processed-gene-184.25-mRNA-1 | Japonica | NA       |               | Os04g0474800 | OsR498G0408756800.01.T01 | Beta-glucosidase 13                                                 |
| augustus_masked-4-processed-gene-184.27-mRNA-1 | Japonica | NA       |               | Os04g0475300 | OsR498G0408759400.01.T01 | Glycogen phosphorylase 1-like                                       |
| augustus_masked-4-processed-gene-185.54-mRNA-1 | Japonica | NA       |               | Os04g0475800 |                          | Pentatricopeptide repeat-containing protein                         |
| augustus_masked-4-processed-gene-185.72-mRNA-1 | Japonica | NA       |               |              | OsR498G0408765500.01.T01 |                                                                     |
| augustus_masked-4-processed-gene-185.74-mRNA-1 | Japonica | NA       |               | Os04g0476800 | OsR498G0408764200.01.T01 | ZZ-type zinc finger-containing protein                              |
| augustus_masked-4-processed-gene-188.46-mRNA-1 | Japonica | NA       |               | Os04g0481800 | OsR498G0408776400.01.T01 | Wax synthase isoform 1                                              |
| augustus_masked-4-processed-gene-188.47-mRNA-1 | Japonica | Japonica |               | Os04g0481900 | OsR498G0408776400.01.T01 | Wax synthase isoform 1                                              |
| augustus_masked-4-processed-gene-19.21-mRNA-1  | Japonica | Japonica |               | Os04g0197500 | OsR498G0407707200.01.T01 | Glycosyltransferase                                                 |
| augustus_masked-4-processed-gene-193.51-mRNA-1 | Japonica | NA       |               | Os04g0493600 | OsR498G0408821800.01.T03 | Chitinase                                                           |
| augustus_masked-4-processed-gene-194.43-mRNA-1 | Japonica | NA       |               |              | OsR498G0307361200.01.T01 |                                                                     |
| augustus_masked-4-processed-gene-195.46-mRNA-1 | Japonica | NA       |               |              | OsR498G0917172900.01.T01 | DUF834 domain-containing protein                                    |
| augustus_masked-4-processed-gene-196.21-mRNA-1 | Japonica | NA       |               | Os05g0376300 | OsR498G0510716000.01.T03 | N-acetyltransferase ESCO1                                           |
| augustus_masked-4-processed-gene-196.30-mRNA-1 | Japonica | NA       |               | Os04g0500600 |                          |                                                                     |
| augustus_masked-4-processed-gene-199.27-mRNA-1 | Japonica | NA       |               | Os04g0505300 |                          |                                                                     |
| augustus_masked-4-processed-gene-199.35-mRNA-1 | Japonica | NA       |               | Os04g0505400 | OsR498G0408855200.01.T01 | Transmembrane protein, putative (DUF247)                            |
| augustus_masked-4-processed-gene-199.37-mRNA-1 | Japonica | Indica   |               | Os04g0505700 | OsR498G0408856000.01.T01 | Putative F-box/LRR-repeat protein 8                                 |
| augustus_masked-4-processed-gene-199.39-mRNA-1 | Japonica | NA       | Kinase-LRR-TM |              |                          | probable leucine-rich repeat receptor-like protein kinase At2g33170 |
| augustus_masked-4-processed-gene-2.9-mRNA-1    | Japonica | NA       |               | Os04g0174100 | OsR498G0407629800.01.T01 | Tyrosine N-monoxygenase                                             |
| augustus_masked-4-processed-gene-200.23-mRNA-1 | Japonica | NA       |               |              | OsR498G0408862600.01.T07 | Protein LOW PSII ACCUMULATION 1, chloroplastic isoform A            |
| augustus_masked-4-processed-gene-201.8-mRNA-1  | Japonica | NA       |               | Os04g0508400 |                          | NAC transcription factor                                            |
| augustus_masked-4-processed-gene-202.26-mRNA-1 | Japonica | NA       |               | Os04g0510400 | OsR498G0408876800.01.T01 | DEAD-box ATP-dependent RNA helicase                                 |
| augustus_masked-4-processed-gene-203.42-mRNA-1 | Japonica | NA       |               | Os04g0512500 | OsR498G0408882000.01.T01 | Embryo sac development arrest 6                                     |
| augustus_masked-4-processed-gene-208.18-mRNA-1 | Japonica | Japonica |               | Os04g0521900 | OsR498G0713495500.01.T01 | Vegetative cell wall protein gp1                                    |
| augustus_masked-4-processed-gene-209.69-mRNA-1 | Japonica | NA       |               |              | OsR498G0408932000.01.T01 | Isochorismatase                                                     |
| augustus_masked-4-processed-gene-210.14-mRNA-1 | Japonica | NA       |               | Os04g0526600 | OsR498G0408934200.01.T01 | Alpha-amylasesubtilisin inhibitor                                   |
| augustus_masked-4-processed-gene-219.18-mRNA-1 | Japonica | NA       |               | Os04g0544100 | OsR498G0409011400.01.T01 | Histone-lysine N-methyltransferase, H3 lysine-9 specific SUVH5      |
| augustus_masked-4-processed-gene-220.30-mRNA-1 | Japonica | NA       |               | Os04g0545300 |                          | Streptogrisin D (Fragment)                                          |
| augustus_masked-4-processed-gene-220.56-mRNA-1 | Japonica | NA       |               | Os04g0546800 | OsR498G0409019800.01.T01 | Ethylene-responsive factor                                          |
| augustus_masked-4-processed-gene-221.10-mRNA-1 | Japonica | NA       |               |              |                          | Putative Anter-specific proline-rich protein APG                    |
| augustus_masked-4-processed-gene-221.11-mRNA-1 | Japonica | Indica   | LRR-NBS-TM    | Os04g0548100 | OsR498G0409024200.01.T01 | Disease resistance protein RPM1                                     |
| augustus_masked-4-processed-gene-221.29-mRNA-1 | Japonica | NA       |               |              | OsR498G0409024800.01.T01 | Glycoprotein homolog                                                |
| augustus_masked-4-processed-gene-225.45-mRNA-1 | Japonica | NA       |               | Os04g0556100 |                          |                                                                     |
| augustus_masked-4-processed-gene-225.47-mRNA-1 | Japonica | NA       |               | Os04g0556400 | OsR498G0409056600.01.T01 | Putative cis-zeatin O-glucosyltransferase                           |
| augustus_masked-4-processed-gene-225.48-mRNA-1 | Japonica | NA       |               | Os04g0556500 | OsR498G0409058200.01.T01 | Glycosyltransferase                                                 |
| augustus_masked-4-processed-gene-225.49-mRNA-1 | Japonica | NA       |               | Os04g0556600 | OsR498G0409058600.01.T01 | Glycosyltransferase                                                 |
| augustus_masked-4-processed-gene-235.67-mRNA-1 | Japonica | NA       |               | Os04g0573300 |                          | Subtilisin-like serine protease                                     |
| augustus_masked-4-processed-gene-239.16-mRNA-1 | Japonica | NA       |               | Os04g0579200 | OsR498G0409138800.01.T01 | E3 ubiquitin-protein ligase RHA2B                                   |
| augustus_masked-4-processed-gene-239.31-mRNA-1 | Japonica | NA       |               | Os04g0580300 | OsR498G0409142800.01.T01 | GRAS domain-containing protein (Fragment)                           |
| augustus_masked-4-processed-gene-239.34-mRNA-1 | Japonica | NA       |               | Os04g0580500 | OsR498G0409144800.01.T01 | Transposon protein, putative, unclassified                          |
| augustus_masked-4-processed-gene-240.22-mRNA-1 | Japonica | NA       |               |              | OsR498G0409146200.01.T01 | RING-H2 finger protein ATL34                                        |
| augustus_masked-4-processed-gene-240.33-mRNA-1 | Japonica | Indica   |               | Os04g0581400 | OsR498G0409149800.01.T02 | TF-B3 domain-containing protein (Fragment)                          |
| augustus_masked-4-processed-gene-241.31-mRNA-1 | Japonica | NA       |               | Os04g0583600 | OsR498G0409163000.01.T01 | Multifunctional fusion protein                                      |

|                                                |          |          |               |              |                          |                                                                            |
|------------------------------------------------|----------|----------|---------------|--------------|--------------------------|----------------------------------------------------------------------------|
| augustus_masked-4-processed-gene-242.57-mRNA-1 | Japonica | NA       |               |              | OsR498G0409165000.01.T01 | L-type lectin-domain containing receptor kinase S.5                        |
| augustus_masked-4-processed-gene-242.67-mRNA-1 | Japonica | NA       |               |              | OsR498G0409168400.01.T01 | RING-H2 finger protein ATL1R                                               |
| augustus_masked-4-processed-gene-245.15-mRNA-1 | Japonica | NA       |               | Os04g0590200 | OsR498G0409187800.01.T01 | AT-hook motif nuclear-localized protein 23                                 |
| augustus_masked-4-processed-gene-245.30-mRNA-1 | Japonica | NA       |               | Os04g0590900 | OsR498G0409190600.01.T01 | Ring-h2 finger protein atl52                                               |
| augustus_masked-4-processed-gene-246.37-mRNA-1 | Japonica | Indica   |               | Os01g0235900 | OsR498G0409198000.01.T01 | Glutaredoxin domain-containing protein                                     |
| augustus_masked-4-processed-gene-246.8-mRNA-1  | Japonica | NA       |               | Os04g0591900 |                          | F-box domain-containing protein (Fragment)                                 |
| augustus_masked-4-processed-gene-247.20-mRNA-1 | Japonica | NA       |               | Os12g0582600 | OsR498G0816427900.01.T01 | Putative mediator of RNA polymerase II transcription subunit 26c           |
| augustus_masked-4-processed-gene-252.41-mRNA-1 | Japonica | NA       |               | Os04g0606000 | OsR498G0409239000.01.T01 | Putative quercetin 3-O-glucoside-6''-O-malonyltransferase                  |
| augustus_masked-4-processed-gene-257.23-mRNA-1 | Japonica | NA       |               | Os04g0612800 |                          | Putative Smr domain, pentacotriptide-repeat region of PRORP                |
| augustus_masked-4-processed-gene-258.8-mRNA-1  | Japonica | NA       |               | Os04g0613900 | OsR498G0409271000.01.T03 | Potassium transporter                                                      |
| augustus_masked-4-processed-gene-260.62-mRNA-1 | Japonica | NA       |               | Os04g0618500 | OsR498G0409288800.01.T03 | gamma-soluble NSF attachment protein-like                                  |
| augustus_masked-4-processed-gene-261.39-mRNA-1 | Japonica | NA       | Kinase-TM     | Os04g0619600 | OsR498G0409294000.01.T01 | Mitogen-activated protein kinase kinase kinase                             |
| augustus_masked-4-processed-gene-261.40-mRNA-1 | Japonica | NA       |               | Os04g0619700 | OsR498G0409294200.01.T01 | F-box/WD-40 repeat-containing protein At5g21040                            |
| augustus_masked-4-processed-gene-264.46-mRNA-1 | Japonica | NA       |               |              | OsR498G0409312200.01.T01 |                                                                            |
| augustus_masked-4-processed-gene-265.58-mRNA-1 | Japonica | NA       |               | Os04g0626100 | OsR498G0409317600.01.T01 | AT hook motif family protein                                               |
| augustus_masked-4-processed-gene-266.79-mRNA-1 | Japonica | NA       |               | Os04g0627900 | OsR498G0409323200.01.T01 | Eukaryotic translation initiation factor SUI1                              |
| augustus_masked-4-processed-gene-267.10-mRNA-1 | Japonica | NA       |               | Os04g0629400 |                          | Thioredoxin-like protein CXXS1                                             |
| augustus_masked-4-processed-gene-269.30-mRNA-1 | Japonica | NA       |               | Os04g0635800 | OsR498G0409343400.01.T01 | N-terminal acetyltransferase complex ARD1 subunit A                        |
| augustus_masked-4-processed-gene-269.6-mRNA-1  | Japonica | NA       |               | Os04g0635000 | OsR498G0409340800.01.T01 | Wound-induced protein                                                      |
| augustus_masked-4-processed-gene-270.6-mRNA-1  | Japonica | NA       |               | Os04g0636900 | OsR498G0409346400.01.T03 | UBP1-associated protein 2A                                                 |
| augustus_masked-4-processed-gene-270.8-mRNA-1  | Japonica | NA       |               | Os04g0637500 |                          |                                                                            |
| augustus_masked-4-processed-gene-273.88-mRNA-1 | Japonica | Japonica |               | Os04g0644200 | OsR498G0409366400.01.T01 | DDE Tnp4 domain-containing protein (Fragment)                              |
| augustus_masked-4-processed-gene-275.25-mRNA-1 | Japonica | NA       |               | Os04g0647300 | OsR498G0409376000.01.T01 | Ubiquitinyl hydrolase 1                                                    |
| augustus_masked-4-processed-gene-276.20-mRNA-1 | Japonica | NA       |               | Os04g0649600 | OsR498G0409388800.01.T01 |                                                                            |
| augustus_masked-4-processed-gene-279.52-mRNA-1 | Japonica | NA       |               | Os04g0654400 | OsR498G0409406000.01.T02 | Pre-mRNA-splicing helicase BRR2, putative                                  |
| augustus_masked-4-processed-gene-279.53-mRNA-1 | Japonica | NA       |               | Os04g0654500 | OsR498G0409406200.01.T01 | Related to large-conductance mechanosensitive channel                      |
| augustus_masked-4-processed-gene-28.4-mRNA-1   | Japonica | NA       |               | Os04g0218100 | OsR498G0407751100.01.T01 | Pentatricopeptide repeat                                                   |
| augustus_masked-4-processed-gene-281.28-mRNA-1 | Japonica | NA       |               | Os04g0658600 | OsR498G0409421400.01.T01 | Ribosomal RNA processing protein A                                         |
| augustus_masked-4-processed-gene-281.29-mRNA-1 | Japonica | NA       |               | Os04g0658800 |                          |                                                                            |
| augustus_masked-4-processed-gene-283.84-mRNA-1 | Japonica | NA       |               | Os04g0662200 | OsR498G0409433600.01.T01 | Indole-3-acetic acid-induced protein ARG7                                  |
| augustus_masked-4-processed-gene-288.13-mRNA-1 | Japonica | NA       |               | Os04g0671800 | OsR498G0409467000.01.T01 | Zinc finger CCCH domain-containing protein 32                              |
| augustus_masked-4-processed-gene-288.15-mRNA-1 | Japonica | NA       | Kinase-LRR-TM | Os04g0672100 | OsR498G0409468600.01.T01 | Phytosulfokine receptor                                                    |
| augustus_masked-4-processed-gene-289.5-mRNA-1  | Japonica | Japonica | LRR-TM        | Os04g0672600 | OsR498G0409468600.01.T01 | Phytosulfokine receptor 2                                                  |
| augustus_masked-4-processed-gene-289.6-mRNA-1  | Japonica | NA       |               | Os04g0672700 | OsR498G0409471000.01.T04 | Pentatricopeptide repeat-containing protein                                |
| augustus_masked-4-processed-gene-290.76-mRNA-1 | Japonica | NA       |               | Os04g0675600 | OsR498G0409484400.01.T05 | Pentatricopeptide repeat-containing protein                                |
| augustus_masked-4-processed-gene-290.77-mRNA-1 | Japonica | NA       |               | Os04g0675700 |                          | DEAD/DEAH box helicase (Fragment)                                          |
| augustus_masked-4-processed-gene-291.21-mRNA-1 | Japonica | Indica   |               | Os04g0677033 | OsR498G0409489200.01.T01 |                                                                            |
| augustus_masked-4-processed-gene-296.29-mRNA-1 | Japonica | Indica   |               | Os04g0685700 | OsR498G0409520600.01.T01 | Putative S-receptor kinase                                                 |
| augustus_masked-4-processed-gene-296.39-mRNA-1 | Japonica | Indica   |               | Os04g0686000 | OsR498G0409522400.01.T01 | RING-type E3 ubiquitin transferase                                         |
| augustus_masked-4-processed-gene-296.42-mRNA-1 | Japonica | NA       |               | Os04g0686500 | OsR498G0409524600.01.T01 | PPR domain-containing protein/PPR_2 domain-containing protein/DYW_de       |
| augustus_masked-4-processed-gene-296.45-mRNA-1 | Japonica | NA       |               | Os04g0686700 | OsR498G0409525000.01.T02 | SKP1-interacting partner 15                                                |
| augustus_masked-4-processed-gene-299.27-mRNA-1 | Japonica | Indica   |               | Os08g0103900 | OsR498G0409539000.01.T01 | Secondary wall NAC master switch                                           |
| augustus_masked-4-processed-gene-3.22-mRNA-1   | Japonica | Indica   |               | Os04g0174800 | OsR498G0407632800.01.T01 | Peptidase S10, serine carboxypeptidase, Alpha/Beta hydrolase fold, DYW do  |
| augustus_masked-4-processed-gene-300.96-mRNA-1 | Japonica | NA       | NBS-TM        |              | OsR498G0409545600.01.T01 | White-brown-complex ABC transporter family                                 |
| augustus_masked-4-processed-gene-4.8-mRNA-1    | Japonica | NA       |               | Os04g0175500 | OsR498G0407635400.01.T01 | Acyl transferase 15                                                        |
| augustus_masked-4-processed-gene-43.23-mRNA-1  | Japonica | NA       |               | Os04g0309500 |                          |                                                                            |
| augustus_masked-4-processed-gene-5.24-mRNA-1   | Japonica | NA       |               |              | OsR498G0407642900.01.T01 |                                                                            |
| augustus_masked-4-processed-gene-57.27-mRNA-1  | Japonica | NA       |               | Os04g0270900 | OsR498G0407902000.01.T01 | UDP-glucosyltransferase                                                    |
| augustus_masked-4-processed-gene-58.26-mRNA-1  | Japonica | Japonica |               | Os04g0271700 | OsR498G0407905000.01.T01 | Glycosyltransferase                                                        |
| augustus_masked-4-processed-gene-58.30-mRNA-1  | Japonica | NA       |               | Os04g0272400 | OsR498G0407905600.01.T01 | Peroxisome-like protein, mitochondrial                                     |
| augustus_masked-4-processed-gene-6.13-mRNA-1   | Japonica | NA       |               | Os04g0179100 | OsR498G0407645000.01.T01 | Momilactone synthase like                                                  |
| augustus_masked-4-processed-gene-60.12-mRNA-1  | Japonica | NA       | Kinase-TM     | Os04g0275100 | OsR498G0407914000.01.T01 | Wall-associated receptor kinase 3                                          |
| augustus_masked-4-processed-gene-73.4-mRNA-1   | Japonica | NA       |               |              | OsR498G0407965000.01.T01 |                                                                            |
| augustus_masked-4-processed-gene-77.21-mRNA-1  | Japonica | NA       |               |              | OsR498G0100073600.01.T01 |                                                                            |
| augustus_masked-4-processed-gene-78.23-mRNA-1  | Japonica | Japonica | Kinase-TM     | Os04g0303300 | OsR498G0407999200.01.T01 | Receptor-like serine/threonine-protein kinase                              |
| augustus_masked-4-processed-gene-79.42-mRNA-1  | Japonica | Indica   |               | Os11g0566800 | OsR498G0408006600.01.T01 | Chalcone and stilbene synthases, N-terminal domain containing protein, exp |
| augustus_masked-4-processed-gene-8.29-mRNA-1   | Japonica | NA       |               | Os04g0182300 |                          | Protease                                                                   |
| augustus_masked-4-processed-gene-81.20-mRNA-1  | Japonica | NA       |               |              |                          | thaumatin-like protein isoform X1                                          |
| augustus_masked-4-processed-gene-81.23-mRNA-1  | Japonica | NA       |               |              | OsR498G1120155900.01.T01 | Skp1 domain-containing protein                                             |
| augustus_masked-4-processed-gene-81.46-mRNA-1  | Japonica | NA       | Kinase-TM     | Os04g0307500 | OsR498G0408014500.01.T02 | Wall-associated receptor kinase 1                                          |
| augustus_masked-4-processed-gene-88.4-mRNA-1   | Japonica | NA       |               |              | OsR498G0408093700.01.T01 | Poly [ADP-ribose] polymerase                                               |

|                                                |          |          |              |              |                          |                                                                           |
|------------------------------------------------|----------|----------|--------------|--------------|--------------------------|---------------------------------------------------------------------------|
| augustus_masked-4-processed-gene-89.32-mRNA-1  | Japonica | Indica   |              | Os04g0317800 | OsR498G0408135500.01.T01 | Expansin-like CBD domain-containing protein                               |
| augustus_masked-5-processed-gene-10.1-mRNA-1   | Japonica | NA       |              | Os05g0119000 | OsR498G0509614300.01.T01 | Aluminum sensitive 3                                                      |
| augustus_masked-5-processed-gene-10.16-mRNA-1  | Japonica | NA       |              | Os05g0120200 | OsR498G0509618900.01.T01 | ABC transporter G family member 6                                         |
| augustus_masked-5-processed-gene-10.17-mRNA-1  | Japonica | NA       |              | Os05g0120300 | OsR498G0509620300.01.T01 |                                                                           |
| augustus_masked-5-processed-gene-13.16-mRNA-1  | Japonica | Indica   |              | Os05g0123200 | OsR498G0509634700.01.T01 | IQ-domain 3                                                               |
| augustus_masked-5-processed-gene-14.15-mRNA-1  | Japonica | NA       | Kinase-TM    | Os05g0125200 | OsR498G0509646500.01.T01 | Receptor-like kinase LIP2                                                 |
| augustus_masked-5-processed-gene-141.41-mRNA-1 | Japonica | NA       |              |              | OsR498G0510413500.01.T01 | Putative disease resistance protein RGA3                                  |
| augustus_masked-5-processed-gene-141.42-mRNA-1 | Japonica | Japonica | LRR-NBS      | Os05g0305600 | OsR498G0510413500.01.T01 | NB-ARC domain containing protein, expressed                               |
| augustus_masked-5-processed-gene-145.19-mRNA-1 | Japonica | NA       |              |              | OsR498G0510435500.01.T01 | Retrotransposon protein, putative, LINE subclass                          |
| augustus_masked-5-processed-gene-15.0-mRNA-1   | Japonica | Japonica |              | Os05g0125600 | OsR498G0509648100.01.T01 |                                                                           |
| augustus_masked-5-processed-gene-15.21-mRNA-1  | Japonica | NA       | Kinase-TM    |              | OsR498G0509654700.01.T01 | Serine/threonine-protein kinase-like protein CCR3                         |
| augustus_masked-5-processed-gene-151.20-mRNA-1 | Japonica | Japonica | CC-Kinase-TM | Os05g0317900 | OsR498G0510480600.01.T01 | Receptor-like protein kinase FERONIA                                      |
| augustus_masked-5-processed-gene-151.7-mRNA-1  | Japonica | NA       |              |              | OsR498G0510472300.01.T01 |                                                                           |
| augustus_masked-5-processed-gene-153.32-mRNA-1 | Japonica | NA       |              | Os05g0320800 |                          |                                                                           |
| augustus_masked-5-processed-gene-168.18-mRNA-1 | Japonica | NA       | CC-Kinase-TM |              | OsR498G0510577100.01.T01 | Receptor-like protein kinase FERONIA                                      |
| augustus_masked-5-processed-gene-168.7-mRNA-1  | Japonica | NA       |              |              | OsR498G0510594200.01.T01 | RNase H domain-containing protein (Fragment)                              |
| augustus_masked-5-processed-gene-17.1-mRNA-1   | Japonica | NA       |              | Os05g0128600 |                          | Transcription factor bHLH148                                              |
| augustus_masked-5-processed-gene-17.20-mRNA-1  | Japonica | Japonica |              | Os05g0129400 | OsR498G0100416900.01.T01 | RRM domain-containing protein                                             |
| augustus_masked-5-processed-gene-170.1-mRNA-1  | Japonica | NA       |              |              | OsR498G0510587600.01.T01 |                                                                           |
| augustus_masked-5-processed-gene-170.3-mRNA-1  | Japonica | NA       |              | Os05g0346300 | OsR498G0510586600.01.T01 | 40S ribosomal protein S7                                                  |
| augustus_masked-5-processed-gene-178.3-mRNA-1  | Japonica | NA       |              |              | OsR498G0510643100.01.T01 | SPX domain-containing protein                                             |
| augustus_masked-5-processed-gene-179.0-mRNA-1  | Japonica | NA       |              | Os05g0359700 |                          |                                                                           |
| augustus_masked-5-processed-gene-179.11-mRNA-1 | Japonica | Indica   |              | Os05g0360400 | OsR498G0510650500.01.T01 | RING-H2 finger protein ATL3F                                              |
| augustus_masked-5-processed-gene-179.17-mRNA-1 | Japonica | Japonica |              | Os05g0361000 | OsR498G0510653900.01.T01 | Putative ferulate 5-hydroxylase                                           |
| augustus_masked-5-processed-gene-18.43-mRNA-1  | Japonica | NA       |              |              | OsR498G0509671900.01.T03 | Fe2OG dioxygenase domain-containing protein (Fragment)                    |
| augustus_masked-5-processed-gene-19.28-mRNA-1  | Japonica | NA       |              |              |                          |                                                                           |
| augustus_masked-5-processed-gene-19.31-mRNA-1  | Japonica | NA       |              | Os05g0133900 | OsR498G0509678900.01.T01 | SAM-dependent MTase DRM-type domain-containing protein                    |
| augustus_masked-5-processed-gene-193.19-mRNA-1 | Japonica | Japonica | NBS-TM       | Os05g0380800 | OsR498G0510731100.01.T01 | Disease resistance protein RPM1                                           |
| augustus_masked-5-processed-gene-194.37-mRNA-1 | Japonica | Indica   |              | Os01g0951500 | OsR498G0510739700.01.T01 | Cytochrome P450 family 94 subfamily D polypeptide 2                       |
| augustus_masked-5-processed-gene-195.20-mRNA-1 | Japonica | NA       |              | Os05g0385400 | OsR498G0510749100.01.T01 |                                                                           |
| augustus_masked-5-processed-gene-196.18-mRNA-1 | Japonica | NA       |              | Os05g0386000 | OsR498G0510752300.01.T01 | Hydroxyproline O-arabinosyltransferase                                    |
| augustus_masked-5-processed-gene-197.22-mRNA-1 | Japonica | NA       |              |              | OsR498G0510760300.01.T01 |                                                                           |
| augustus_masked-5-processed-gene-197.3-mRNA-1  | Japonica | NA       | CC-Kinase-TM | Os05g0387600 |                          | serine/threonine-protein kinase-like protein At3g51990                    |
| augustus_masked-5-processed-gene-200.42-mRNA-1 | Japonica | NA       |              |              | OsR498G0510774100.01.T04 | SNF2 domain-containing protein CLASSY 3                                   |
| augustus_masked-5-processed-gene-200.46-mRNA-1 | Japonica | NA       |              | Os05g0393200 | OsR498G0510775900.01.T01 | Putative ribosomal protein L34e superfamily protein-like                  |
| augustus_masked-5-processed-gene-201.18-mRNA-1 | Japonica | NA       |              |              | OsR498G0510782300.01.T01 | BRO1 domain-containing protein                                            |
| augustus_masked-5-processed-gene-203.36-mRNA-1 | Japonica | NA       |              |              | OsR498G0510789700.01.T06 |                                                                           |
| augustus_masked-5-processed-gene-203.37-mRNA-1 | Japonica | Indica   |              | Os05g0397800 | OsR498G0510790300.01.T04 | J domain-containing protein (Fragment)                                    |
| augustus_masked-5-processed-gene-203.56-mRNA-1 | Japonica | NA       |              | Os05g0399300 | OsR498G0510793300.01.T01 | Chitinase                                                                 |
| augustus_masked-5-processed-gene-206.0-mRNA-1  | Japonica | NA       |              | Os05g0402900 | OsR498G0510802100.01.T01 | Peptidase A1 domain-containing protein (Fragment)                         |
| augustus_masked-5-processed-gene-206.1-mRNA-1  | Japonica | NA       |              | Os05g0403000 | OsR498G0510802300.01.T01 | Peptidase A1 domain-containing protein                                    |
| augustus_masked-5-processed-gene-206.15-mRNA-1 | Japonica | NA       |              | Os05g0404000 | OsR498G0510804300.01.T01 | Mitochondrial transcription termination factor                            |
| augustus_masked-5-processed-gene-206.3-mRNA-1  | Japonica | NA       |              | Os05g0403300 | OsR498G0510803300.01.T01 | Peptidase A1 domain-containing protein (Fragment)                         |
| augustus_masked-5-processed-gene-210.15-mRNA-1 | Japonica | Japonica |              | Os05g0409100 | OsR498G0510822100.01.T01 | Wall-associated receptor kinase galacturonan-binding domain-containing pr |
| augustus_masked-5-processed-gene-211.21-mRNA-1 | Japonica | NA       |              | Os05g0409800 | OsR498G0510825100.01.T01 | Pentatricopeptide repeat-containing protein                               |
| augustus_masked-5-processed-gene-212.0-mRNA-1  | Japonica | NA       |              |              | OsR498G0510828300.01.T01 |                                                                           |
| augustus_masked-5-processed-gene-218.0-mRNA-1  | Japonica | Japonica |              | Os05g0422200 | OsR498G0612271200.01.T01 | TLDC domain-containing protein (Fragment)                                 |
| augustus_masked-5-processed-gene-218.9-mRNA-1  | Japonica | NA       |              |              | OsR498G0510871500.01.T05 |                                                                           |
| augustus_masked-5-processed-gene-219.23-mRNA-1 | Japonica | Indica   |              | Os06g0261300 | OsR498G0510877500.01.T01 |                                                                           |
| augustus_masked-5-processed-gene-22.10-mRNA-1  | Japonica | NA       |              | Os05g0137600 | OsR498G0509697700.01.T05 | PAB-dependent poly(A)-specific ribonuclease subunit PAN3 (Fragment)       |
| augustus_masked-5-processed-gene-22.13-mRNA-1  | Japonica | Japonica |              | Os05g0138200 | OsR498G0100702400.01.T01 | Class II chitinase                                                        |
| augustus_masked-5-processed-gene-220.31-mRNA-1 | Japonica | NA       |              | Os05g0426900 | OsR498G0510884500.01.T01 |                                                                           |
| augustus_masked-5-processed-gene-220.34-mRNA-1 | Japonica | NA       |              | Os05g0427100 | OsR498G0510884900.01.T02 | PB1 domain-containing protein                                             |
| augustus_masked-5-processed-gene-220.35-mRNA-1 | Japonica | NA       |              |              |                          | Protein ACCELERATED CELL DEATH 6-like                                     |
| augustus_masked-5-processed-gene-226.22-mRNA-1 | Japonica | NA       |              | Os05g0440000 | OsR498G0510927500.01.T01 | Dof-type domain-containing protein (Fragment)                             |
| augustus_masked-5-processed-gene-227.13-mRNA-1 | Japonica | NA       |              |              |                          |                                                                           |
| augustus_masked-5-processed-gene-227.2-mRNA-1  | Japonica | NA       |              | Os05g0440900 | OsR498G0510929500.01.T01 | Transcription repressor                                                   |
| augustus_masked-5-processed-gene-229.13-mRNA-1 | Japonica | NA       |              | Os05g0445100 | OsR498G0510943100.01.T01 |                                                                           |
| augustus_masked-5-processed-gene-23.6-mRNA-1   | Japonica | Indica   |              | Os05g0140500 | OsR498G0509710100.01.T01 | RNA-binding protein 8A-B                                                  |
| augustus_masked-5-processed-gene-232.3-mRNA-1  | Japonica | Indica   |              | Os05g0450600 | OsR498G0510960100.01.T01 | UPF0503 protein chloroplastic                                             |
| augustus_masked-5-processed-gene-233.26-mRNA-1 | Japonica | NA       |              | Os05g0452800 | OsR498G0510966100.01.T01 | RING-CH-type domain-containing protein (Fragment)                         |

|                                                |          |          |               |              |                          |                                                                         |
|------------------------------------------------|----------|----------|---------------|--------------|--------------------------|-------------------------------------------------------------------------|
| augustus_masked-5-processed-gene-234.11-mRNA-1 | Japonica | NA       |               | Os05g0455900 | OsR498G0510977300.01.T03 | Pentatricopeptide repeat                                                |
| augustus_masked-5-processed-gene-236.8-mRNA-1  | Japonica | NA       |               | Os05g0459300 | OsR498G0510985100.01.T02 | Glucan endo-1,3-beta-glucosidase isoform 1                              |
| augustus_masked-5-processed-gene-238.0-mRNA-1  | Japonica | NA       |               | Os05g0462500 | OsR498G0510997100.01.T02 | Transmembrane receptor                                                  |
| augustus_masked-5-processed-gene-239.31-mRNA-1 | Japonica | NA       |               | Os05g0466600 | OsR498G0510997800.01.T01 | Multifunctional fusion protein                                          |
| augustus_masked-5-processed-gene-240.55-mRNA-1 | Japonica | Japonica | LRR-TM        | Os05g0468200 | OsR498G0511013500.01.T01 | DUF1618 domain-containing protein (Fragment)                            |
| augustus_masked-5-processed-gene-241.37-mRNA-1 | Japonica | NA       |               | Os05g0470700 | OsR498G0511020500.01.T01 | E3 ubiquitin-protein ligase RNF5                                        |
| augustus_masked-5-processed-gene-242.21-mRNA-1 | Japonica | NA       |               | Os05g0470900 |                          |                                                                         |
| augustus_masked-5-processed-gene-242.39-mRNA-1 | Japonica | NA       |               |              | OsR498G0511025500.01.T01 |                                                                         |
| augustus_masked-5-processed-gene-243.16-mRNA-1 | Japonica | NA       |               | Os05g0474400 | OsR498G0511029900.01.T01 |                                                                         |
| augustus_masked-5-processed-gene-244.18-mRNA-1 | Japonica | NA       |               | Os05g0474700 | OsR498G0511031100.01.T01 |                                                                         |
| augustus_masked-5-processed-gene-244.29-mRNA-1 | Japonica | Indica   |               | Os04g0544200 | OsR498G0511033100.01.T01 | Cyclin                                                                  |
| augustus_masked-5-processed-gene-245.14-mRNA-1 | Japonica | NA       |               | Os05g0476700 | OsR498G0511042100.01.T01 | RING-type E3 ubiquitin transferase                                      |
| augustus_masked-5-processed-gene-245.15-mRNA-1 | Japonica | NA       |               | Os05g0477200 | OsR498G0511043500.01.T01 | Transcription repressor                                                 |
| augustus_masked-5-processed-gene-245.17-mRNA-1 | Japonica | NA       |               | Os05g0477900 | OsR498G0511045900.01.T01 | Non-specific lipid-transfer protein (Fragment)                          |
| augustus_masked-5-processed-gene-246.1-mRNA-1  | Japonica | NA       |               |              | OsR498G0511046900.01.T01 |                                                                         |
| augustus_masked-5-processed-gene-248.14-mRNA-1 | Japonica | NA       |               | Os05g0482400 | OsR498G0511060710.01.T02 | Secologanin synthase                                                    |
| augustus_masked-5-processed-gene-249.40-mRNA-1 | Japonica | NA       |               |              | OsR498G0511072900.01.T01 | GRAS domain-containing protein (Fragment)                               |
| augustus_masked-5-processed-gene-251.49-mRNA-1 | Japonica | NA       |               | Os05g0489100 | OsR498G0511080900.01.T03 | Procollagen-proline 4-dioxygenase                                       |
| augustus_masked-5-processed-gene-252.1-mRNA-1  | Japonica | NA       |               | Os05g0490100 | OsR498G0511083100.01.T01 | 60S ribosomal protein L30                                               |
| augustus_masked-5-processed-gene-253.1-mRNA-1  | Japonica | NA       | CC-LRR-NBS-TM |              | OsR498G0511090900.01.T01 | NBS-LRR type resistance protein (Fragment)                              |
| augustus_masked-5-processed-gene-253.16-mRNA-1 | Japonica | Japonica | CC-LRR-NBS-TM | Os05g0492600 | OsR498G0511090900.01.T01 | NBS-LRR type resistance protein (Fragment)                              |
| augustus_masked-5-processed-gene-254.30-mRNA-1 | Japonica | NA       |               | Os05g0494500 | OsR498G0511097100.01.T04 | Plastidic phosphate translocator-like protein1                          |
| augustus_masked-5-processed-gene-254.31-mRNA-1 | Japonica | NA       |               |              | OsR498G0511098100.01.T01 | WAS/WASL-interacting protein family member 3-like                       |
| augustus_masked-5-processed-gene-254.42-mRNA-1 | Japonica | NA       |               | Os05g0495100 | OsR498G0511098700.01.T01 | Coiled-coil domain-containing protein 16                                |
| augustus_masked-5-processed-gene-254.45-mRNA-1 | Japonica | NA       |               |              | OsR498G0408669000.01.T01 | Leucine Rich Repeat family protein, expressed                           |
| augustus_masked-5-processed-gene-254.47-mRNA-1 | Japonica | NA       |               | Os05g0496000 | OsR498G0511102100.01.T01 | Putative glucan endo-13-beta-glucosidase BG1                            |
| augustus_masked-5-processed-gene-255.23-mRNA-1 | Japonica | NA       |               |              | OsR498G0511103500.01.T01 | SMC hinge domain-containing protein                                     |
| augustus_masked-5-processed-gene-255.40-mRNA-1 | Japonica | Indica   |               | Os05g0497500 | OsR498G0511105800.01.T06 | Zinc finger CCCH domain-containing protein 36                           |
| augustus_masked-5-processed-gene-257.22-mRNA-1 | Japonica | NA       |               | Os05g0500000 | OsR498G0511113900.01.T01 | UDP-glucosyltransferase                                                 |
| augustus_masked-5-processed-gene-257.25-mRNA-1 | Japonica | NA       |               | Os05g0500600 | OsR498G0511115500.01.T01 | Scarecrow-like protein 32                                               |
| augustus_masked-5-processed-gene-257.26-mRNA-1 | Japonica | NA       |               | Os05g0500700 | OsR498G0511115700.01.T01 | S-adenosyl-L-methionine-dependent methyltransferase superfamily protein |
| augustus_masked-5-processed-gene-257.3-mRNA-1  | Japonica | NA       |               | Os05g0499600 | OsR498G0511113100.01.T01 | UDP-glucosyltransferase                                                 |
| augustus_masked-5-processed-gene-257.5-mRNA-1  | Japonica | NA       |               | Os05g0499800 | OsR498G0511113500.01.T01 | UDP-glucosyltransferase                                                 |
| augustus_masked-5-processed-gene-259.3-mRNA-1  | Japonica | Indica   |               | Os01g0778400 | OsR498G0511123500.01.T01 | Arabinogalactan peptide                                                 |
| augustus_masked-5-processed-gene-261.38-mRNA-1 | Japonica | NA       |               | Os05g0506000 | OsR498G0511140700.01.T01 | Protein SULFUR DEFICIENCY-INDUCED like                                  |
| augustus_masked-5-processed-gene-261.52-mRNA-1 | Japonica | Japonica |               | Os05g0507000 | OsR498G0511143300.01.T01 | Putative mutator-like transposase                                       |
| augustus_masked-5-processed-gene-261.53-mRNA-1 | Japonica | Indica   |               | Os05g0507300 | OsR498G0511143700.01.T02 | Calreticulin                                                            |
| augustus_masked-5-processed-gene-261.54-mRNA-1 | Japonica | NA       |               | Os05g0507400 |                          |                                                                         |
| augustus_masked-5-processed-gene-262.19-mRNA-1 | Japonica | NA       |               |              | OsR498G0511154300.01.T01 |                                                                         |
| augustus_masked-5-processed-gene-263.12-mRNA-1 | Japonica | NA       |               |              | OsR498G0511160300.01.T01 | Major facilitator superfamily protein isoform 1                         |
| augustus_masked-5-processed-gene-263.13-mRNA-1 | Japonica | NA       |               | Os05g0510100 | OsR498G0511160900.01.T02 |                                                                         |
| augustus_masked-5-processed-gene-264.42-mRNA-1 | Japonica | NA       |               | Os05g0510400 | OsR498G0511161700.01.T02 | F-box family protein-like                                               |
| augustus_masked-5-processed-gene-264.52-mRNA-1 | Japonica | NA       |               | Os05g0511050 |                          | Peptidase A1 domain-containing protein (Fragment)                       |
| augustus_masked-5-processed-gene-265.1-mRNA-1  | Japonica | NA       |               | Os05g0512200 | OsR498G0511168700.01.T02 | Lysine-tRNA ligase                                                      |
| augustus_masked-5-processed-gene-265.3-mRNA-1  | Japonica | NA       |               | Os05g0512600 | OsR498G0511170100.01.T01 | X8 domain-containing protein                                            |
| augustus_masked-5-processed-gene-266.19-mRNA-1 | Japonica | NA       | Kinase-TM     | Os05g0514200 | OsR498G0511175300.01.T02 | Non-specific serine/threonine protein kinase                            |
| augustus_masked-5-processed-gene-266.30-mRNA-1 | Japonica | NA       |               | Os05g0514500 | OsR498G0511177100.01.T01 | Interactor of constitutive active ROPs 1                                |
| augustus_masked-5-processed-gene-267.47-mRNA-1 | Japonica | NA       |               | Os05g0515700 | OsR498G0511181500.01.T01 | Transcription factor VOZ1                                               |
| augustus_masked-5-processed-gene-267.60-mRNA-1 | Japonica | NA       |               | Os05g0516300 | OsR498G0511182700.01.T04 | Glucosamine-phosphate N-acetyltransferase                               |
| augustus_masked-5-processed-gene-268.21-mRNA-1 | Japonica | NA       |               | Os05g0519000 | OsR498G0511193300.01.T01 | VQ motif-containing protein 4                                           |
| augustus_masked-5-processed-gene-269.37-mRNA-1 | Japonica | NA       | Kinase-TM     | Os05g0519200 | OsR498G0511194100.01.T05 | Serine/threonine protein kinase                                         |
| augustus_masked-5-processed-gene-269.38-mRNA-1 | Japonica | NA       |               |              |                          |                                                                         |
| augustus_masked-5-processed-gene-269.52-mRNA-1 | Japonica | Indica   |               | Os02g0563800 | OsR498G0511196700.01.T01 | F-box domain-containing protein                                         |
| augustus_masked-5-processed-gene-27.1-mRNA-1   | Japonica | NA       |               |              | OsR498G0509733700.01.T01 | Protease Do-like protein 2, chloroplastic                               |
| augustus_masked-5-processed-gene-273.24-mRNA-1 | Japonica | NA       |               | Os05g0526600 | OsR498G0511217700.01.T01 | RING-H2 finger protein ATL68                                            |
| augustus_masked-5-processed-gene-273.26-mRNA-1 | Japonica | Japonica |               | Os05g0526900 | OsR498G0101954200.01.T01 | Glycosyltransferase                                                     |
| augustus_masked-5-processed-gene-28.69-mRNA-1  | Japonica | NA       |               | Os05g0150100 | OsR498G0509740900.01.T01 | DUF295 domain-containing protein                                        |
| augustus_masked-5-processed-gene-282.4-mRNA-1  | Japonica | NA       |               | Os05g0545700 |                          |                                                                         |
| augustus_masked-5-processed-gene-282.5-mRNA-1  | Japonica | NA       |               |              | OsR498G0511284900.01.T01 |                                                                         |
| augustus_masked-5-processed-gene-299.52-mRNA-1 | Japonica | NA       |               | Os05g0579200 | OsR498G0511399700.01.T01 | Long-chain-fatty-acid--AMP ligase FadD29                                |
| augustus_masked-5-processed-gene-299.59-mRNA-1 | Japonica | Indica   |               | Os05g0579900 | OsR498G0511403100.01.T01 | Auxilin-like protein 1                                                  |

|                                                |          |          |               |              |                          |                                                                |
|------------------------------------------------|----------|----------|---------------|--------------|--------------------------|----------------------------------------------------------------|
| augustus_masked-5-processed-gene-30.20-mRNA-1  | Japonica | Japonica |               | Os05g0152900 | OsR498G0509751100.01.T01 | RING-type E3 ubiquitin transferase                             |
| augustus_masked-5-processed-gene-30.27-mRNA-1  | Japonica | NA       |               | Os05g0153200 | OsR498G0509751900.01.T03 | Factor of DNA methylation 1                                    |
| augustus_masked-5-processed-gene-30.28-mRNA-1  | Japonica | NA       |               | Os05g0153400 | OsR498G0509752700.01.T01 | Vegetative storage protein                                     |
| augustus_masked-5-processed-gene-30.29-mRNA-1  | Japonica | NA       |               | Os05g0128900 | OsR498G0816083200.01.T02 | Trehalose phosphate synthase                                   |
| augustus_masked-5-processed-gene-300.15-mRNA-1 | Japonica | NA       |               | Os05g0581300 |                          | Pentatricopeptide repeat-containing protein                    |
| augustus_masked-5-processed-gene-300.16-mRNA-1 | Japonica | NA       |               | Os05g0581700 |                          | Putative GPI-anchored protein 58                               |
| augustus_masked-5-processed-gene-300.17-mRNA-1 | Japonica | NA       |               | Os05g0581800 | OsR498G0511407900.01.T03 | GBF-interacting protein 1                                      |
| augustus_masked-5-processed-gene-300.2-mRNA-1  | Japonica | NA       |               | Os05g0580800 |                          |                                                                |
| augustus_masked-5-processed-gene-301.25-mRNA-1 | Japonica | NA       |               | Os05g0582500 | OsR498G0511410700.01.T01 | Carboxypeptidase                                               |
| augustus_masked-5-processed-gene-301.26-mRNA-1 | Japonica | NA       |               | Os05g0582600 | OsR498G0511410900.01.T01 | Carboxypeptidase                                               |
| augustus_masked-5-processed-gene-301.27-mRNA-1 | Japonica | NA       |               | Os05g0582800 | OsR498G0511411500.01.T01 | Carboxypeptidase                                               |
| augustus_masked-5-processed-gene-301.39-mRNA-1 | Japonica | NA       |               | Os03g0733400 |                          | Zinc finger BED domain-containing protein DAYSLEEPER           |
| augustus_masked-5-processed-gene-301.42-mRNA-1 | Japonica | NA       |               | Os05g0583200 |                          | BED-type domain-containing protein                             |
| augustus_masked-5-processed-gene-301.45-mRNA-1 | Japonica | NA       |               | Os05g0583400 | OsR498G0511413700.01.T01 | Mitochondrial import receptor subunit TOM7                     |
| augustus_masked-5-processed-gene-301.47-mRNA-1 | Japonica | Indica   |               | Os05g0583600 | OsR498G0511414500.01.T01 | Transcription repressor                                        |
| augustus_masked-5-processed-gene-302.32-mRNA-1 | Japonica | Japonica | Kinase-TM     | Os05g0585800 | OsR498G0101562800.01.T03 | mitogen-activated protein kinase kinase kinase 7               |
| augustus_masked-5-processed-gene-303.47-mRNA-1 | Japonica | NA       |               |              | OsR498G0511427500.01.T01 | Pentatricopeptide repeat-containing protein mitochondrial      |
| augustus_masked-5-processed-gene-304.14-mRNA-1 | Japonica | NA       | Kinase-LRR-TM | Os05g0588250 | OsR498G0511432300.01.T02 | Putative inactive receptor kinase                              |
| augustus_masked-5-processed-gene-304.15-mRNA-1 | Japonica | NA       | Kinase        | Os05g0588300 | OsR498G0511432300.01.T01 | Receptor-like protein kinase 1-like                            |
| augustus_masked-5-processed-gene-305.12-mRNA-1 | Japonica | Japonica |               | Os05g0591300 | OsR498G0511439500.01.T01 | Peptidase A1 domain-containing protein (Fragment)              |
| augustus_masked-5-processed-gene-305.14-mRNA-1 | Japonica | Japonica |               | Os05g0591400 | OsR498G0511440100.01.T01 | Luminal-binding protein-like                                   |
| augustus_masked-5-processed-gene-31.3-mRNA-1   | Japonica | Indica   |               | Os05g0154700 | OsR498G0509767100.01.T01 | Kinesin-like protein KIN-13A                                   |
| augustus_masked-5-processed-gene-32.55-mRNA-1  | Japonica | NA       |               | Os07g0550600 | OsR498G0714539100.01.T01 | Benzyl alcohol O-benzoyltransferase                            |
| augustus_masked-5-processed-gene-32.59-mRNA-1  | Japonica | NA       |               |              | OsR498G0509773100.01.T01 | J domain-containing protein (Fragment)                         |
| augustus_masked-5-processed-gene-33.40-mRNA-1  | Japonica | NA       |               | Os05g0157100 | OsR498G0509774500.01.T02 | DNA-directed RNA polymerase V subunit 7                        |
| augustus_masked-5-processed-gene-36.15-mRNA-1  | Japonica | NA       | Kinase-TM     |              | OsR498G0509796100.01.T01 | Receptor-like protein kinase HERK 1                            |
| augustus_masked-5-processed-gene-37.37-mRNA-1  | Japonica | NA       |               | Os05g0164200 | OsR498G0509802100.01.T01 | RING-H2 finger protein ATL3F                                   |
| augustus_masked-5-processed-gene-39.47-mRNA-1  | Japonica | NA       |               | Os05g0457000 | OsR498G1019116500.01.T01 | Kinesin heavy chain-like                                       |
| augustus_masked-5-processed-gene-4.11-mRNA-1   | Japonica | NA       |               | Os05g0107300 | OsR498G0509576500.01.T05 |                                                                |
| augustus_masked-5-processed-gene-42.0-mRNA-1   | Japonica | NA       |               |              | OsR498G0510294600.01.T01 | Zinc knuckle containing protein-like                           |
| augustus_masked-5-processed-gene-45.45-mRNA-1  | Japonica | NA       |               |              | OsR498G1221765900.01.T01 | Interactor of constitutive active ROPs 2, chloroplastic        |
| augustus_masked-5-processed-gene-47.0-mRNA-1   | Japonica | NA       |               | Os05g0179100 | OsR498G0509858900.01.T01 |                                                                |
| augustus_masked-5-processed-gene-48.24-mRNA-1  | Japonica | NA       |               | Os05g0181200 |                          | Alkane hydroxylase MAH1                                        |
| augustus_masked-5-processed-gene-48.26-mRNA-1  | Japonica | NA       |               | Os05g0181800 |                          |                                                                |
| augustus_masked-5-processed-gene-5.13-mRNA-1   | Japonica | Indica   |               | Os05g0110000 | OsR498G0509583500.01.T01 | RING-type E3 ubiquitin transferase                             |
| augustus_masked-5-processed-gene-53.39-mRNA-1  | Japonica | NA       |               | Os05g0188100 | OsR498G0509901500.01.T01 |                                                                |
| augustus_masked-5-processed-gene-54.10-mRNA-1  | Japonica | NA       |               |              | OsR498G0509904900.01.T01 |                                                                |
| augustus_masked-5-processed-gene-6.59-mRNA-1   | Japonica | NA       |               | Os05g0111200 | OsR498G0509588500.01.T01 | Outer envelope pore protein 16 chloroplastic                   |
| augustus_masked-5-processed-gene-67.8-mRNA-1   | Japonica | Japonica |               | Os05g0208900 | OsR498G0509995200.01.T01 |                                                                |
| augustus_masked-5-processed-gene-69.1-mRNA-1   | Japonica | Japonica |               | Os05g0212100 | OsR498G0510003100.01.T01 | Pentatricopeptide repeat-containing protein chloroplastic      |
| augustus_masked-5-processed-gene-7.0-mRNA-1    | Japonica | NA       |               |              | OsR498G0509595100.01.T01 |                                                                |
| augustus_masked-5-processed-gene-7.3-mRNA-1    | Japonica | NA       |               | Os05g0112900 | OsR498G0509596900.01.T01 | Pentatricopeptide repeat-containing protein mitochondrial      |
| augustus_masked-5-processed-gene-8.19-mRNA-1   | Japonica | NA       |               |              | OsR498G0509598900.01.T01 |                                                                |
| augustus_masked-5-processed-gene-86.26-mRNA-1  | Japonica | NA       |               | Os09g0503400 | OsR498G0917762300.01.T01 | Leucyl-tRNA synthetase                                         |
| augustus_masked-5-processed-gene-87.12-mRNA-1  | Japonica | Japonica |               | Os05g0242000 | OsR498G0101343800.01.T01 | 60S ribosomal protein L21-1                                    |
| augustus_masked-5-processed-gene-9.14-mRNA-1   | Japonica | NA       |               |              | OsR498G0509609300.01.T01 |                                                                |
| augustus_masked-5-processed-gene-9.20-mRNA-1   | Japonica | NA       |               | Os05g0118000 | OsR498G0509612100.01.T01 | SRR1 domain-containing protein                                 |
| augustus_masked-5-processed-gene-90.19-mRNA-1  | Japonica | NA       |               | Os05g0248200 | OsR498G0510139500.01.T01 | Xylanase inhibitor protein XIP                                 |
| augustus_masked-6-processed-gene-100.11-mRNA-1 | Japonica | NA       |               | Os06g0285200 | OsR498G0612149700.01.T01 | HAP3 transcriptional-activator                                 |
| augustus_masked-6-processed-gene-100.19-mRNA-1 | Japonica | NA       |               |              | OsR498G0204046800.01.T01 | Circumsporozoite protein-like                                  |
| augustus_masked-6-processed-gene-104.34-mRNA-1 | Japonica | NA       |               | Os06g0292100 | OsR498G0612172400.01.T01 | Embryogenesis transmembrane protein                            |
| augustus_masked-6-processed-gene-104.35-mRNA-1 | Japonica | Indica   |               | Os06g0292400 | OsR498G0612172800.01.T02 | PGG domain-containing protein                                  |
| augustus_masked-6-processed-gene-106.30-mRNA-1 | Japonica | NA       |               |              | OsR498G0612181600.01.T01 |                                                                |
| augustus_masked-6-processed-gene-106.32-mRNA-1 | Japonica | NA       |               | Os03g0122400 | OsR498G0100876000.01.T01 | Transposon protein, putative, Mutator sub-class                |
| augustus_masked-6-processed-gene-107.37-mRNA-1 | Japonica | NA       |               | Os06g0297500 | OsR498G0612189500.01.T01 | Embryogenesis transmembrane protein-like                       |
| augustus_masked-6-processed-gene-107.49-mRNA-1 | Japonica | NA       |               |              | OsR498G0612188800.01.T01 | Embryogenesis transmembrane protein-like                       |
| augustus_masked-6-processed-gene-108.11-mRNA-1 | Japonica | Japonica |               | Os06g0298700 | OsR498G0612194000.01.T01 | Hydroxysteroid dehydrogenase-like protein 1                    |
| augustus_masked-6-processed-gene-108.6-mRNA-1  | Japonica | NA       |               |              | OsR498G0612193600.01.T01 |                                                                |
| augustus_masked-6-processed-gene-109.10-mRNA-1 | Japonica | NA       |               | Os06g0300700 | OsR498G0612202300.01.T02 | Serine/threonine-protein phosphatase 4 regulatory subunit like |
| augustus_masked-6-processed-gene-110.19-mRNA-1 | Japonica | NA       |               | Os03g0124100 | OsR498G0305151500.01.T02 | Beta-1,3-N-acetylglucosaminyltransferase lunatic fringe        |
| augustus_masked-6-processed-gene-110.6-mRNA-1  | Japonica | NA       |               |              | OsR498G0612206300.01.T01 | Amino acid transporter-like                                    |

|                                                |          |          |        |              |                          |                                                                         |
|------------------------------------------------|----------|----------|--------|--------------|--------------------------|-------------------------------------------------------------------------|
| augustus_masked-6-processed-gene-110.8-mRNA-1  | Japonica | Indica   |        | Os06g0302000 | OsR498G0612208900.01.T01 | BURP domain-containing protein 11                                       |
| augustus_masked-6-processed-gene-111.21-mRNA-1 | Japonica | NA       |        |              | OsR498G0612212800.01.T01 | Chemotaxis protein CheA                                                 |
| augustus_masked-6-processed-gene-112.0-mRNA-1  | Japonica | NA       |        | Os06g0303700 | OsR498G0612215700.01.T04 | MYB transcription factor-like                                           |
| augustus_masked-6-processed-gene-112.1-mRNA-1  | Japonica | NA       |        | Os06g0303700 | OsR498G0612215700.01.T01 | Putative transcriptional regulator ATRX-like                            |
| augustus_masked-6-processed-gene-112.3-mRNA-1  | Japonica | NA       |        |              | OsR498G0612217500.01.T01 | C2H2-type domain-containing protein                                     |
| augustus_masked-6-processed-gene-113.17-mRNA-1 | Japonica | NA       |        | Os06g0306600 | OsR498G0612221700.01.T01 | probable carboxylesterase 18                                            |
| augustus_masked-6-processed-gene-118.1-mRNA-1  | Japonica | Japonica |        | Os06g0314100 | OsR498G0612258000.01.T01 | Pentatricopeptide repeat                                                |
| augustus_masked-6-processed-gene-118.3-mRNA-1  | Japonica | Indica   |        | Os06g0314501 | OsR498G0612260000.01.T01 |                                                                         |
| augustus_masked-6-processed-gene-120.19-mRNA-1 | Japonica | Indica   |        | Os06g0317200 | OsR498G0612267300.01.T01 | glycine-rich cell wall structural protein 2-like                        |
| augustus_masked-6-processed-gene-120.45-mRNA-1 | Japonica | Japonica |        | Os05g0422200 | OsR498G0612271200.01.T01 | TLDC domain-containing protein (Fragment)                               |
| augustus_masked-6-processed-gene-121.41-mRNA-1 | Japonica | NA       |        |              | OsR498G0612274700.01.T01 |                                                                         |
| augustus_masked-6-processed-gene-122.12-mRNA-1 | Japonica | NA       |        | Os06g0321700 |                          |                                                                         |
| augustus_masked-6-processed-gene-122.2-mRNA-1  | Japonica | NA       |        | Os06g0320300 | OsR498G0612275800.01.T01 | Linoleate 13S-lipoxygenase 2-1                                          |
| augustus_masked-6-processed-gene-123.1-mRNA-1  | Japonica | Japonica |        | Os06g0322300 | OsR498G0612281500.01.T01 | Putative jasmonate O-methyltransferase                                  |
| augustus_masked-6-processed-gene-124.0-mRNA-1  | Japonica | NA       |        |              | OsR498G0612383800.01.T01 |                                                                         |
| augustus_masked-6-processed-gene-124.16-mRNA-1 | Japonica | NA       |        |              | OsR498G0612286300.01.T01 |                                                                         |
| augustus_masked-6-processed-gene-124.27-mRNA-1 | Japonica | NA       |        | Os06g0325700 |                          |                                                                         |
| augustus_masked-6-processed-gene-125.0-mRNA-1  | Japonica | Japonica |        | Os06g0325900 | OsR498G0815038200.01.T01 | Putative ferulate 5-hydroxylase                                         |
| augustus_masked-6-processed-gene-125.10-mRNA-1 | Japonica | NA       |        | Os06g0326900 | OsR498G0612296100.01.T02 | PPC domain-containing protein (Fragment)                                |
| augustus_masked-6-processed-gene-125.3-mRNA-1  | Japonica | NA       |        | Os08g0381000 | OsR498G0713957300.01.T01 |                                                                         |
| augustus_masked-6-processed-gene-127.24-mRNA-1 | Japonica | NA       |        | Os08g0152400 | OsR498G0815203000.01.T01 | Cytochrome P450 family 87 subfamily A polypeptide 6                     |
| augustus_masked-6-processed-gene-128.14-mRNA-1 | Japonica | NA       |        |              | OsR498G0612309300.01.T01 |                                                                         |
| augustus_masked-6-processed-gene-128.25-mRNA-1 | Japonica | NA       |        | Os06g0331900 | OsR498G0612561200.01.T01 | Aluminum-activated malate transporter 10                                |
| augustus_masked-6-processed-gene-129.38-mRNA-1 | Japonica | NA       |        | Os06g0332800 | OsR498G0612558900.01.T01 | Protein BUNDLE SHEATH DEFECTIVE 2, chloroplastic                        |
| augustus_masked-6-processed-gene-131.41-mRNA-1 | Japonica | NA       |        |              | OsR498G0917449000.01.T03 | Zinc-finger homeodomain protein 9                                       |
| augustus_masked-6-processed-gene-131.42-mRNA-1 | Japonica | NA       |        |              | OsR498G0612544300.01.T01 | AP2/ERF domain-containing protein                                       |
| augustus_masked-6-processed-gene-132.28-mRNA-1 | Japonica | NA       |        | Os05g0457000 | OsR498G0305421900.01.T01 |                                                                         |
| augustus_masked-6-processed-gene-133.14-mRNA-1 | Japonica | Japonica |        | Os06g0339800 | OsR498G0815054500.01.T01 | Structural constituent of ribosome                                      |
| augustus_masked-6-processed-gene-134.16-mRNA-1 | Japonica | NA       |        | Os06g0343100 | OsR498G0612524900.01.T01 | RNA helicase                                                            |
| augustus_masked-6-processed-gene-134.17-mRNA-1 | Japonica | NA       |        | Os06g0343600 | OsR498G0612523700.01.T01 | Glycosyltransferase                                                     |
| augustus_masked-6-processed-gene-134.3-mRNA-1  | Japonica | NA       |        | Os06g0342000 | OsR498G0612527500.01.T01 | Exostosin domain-containing protein (Fragment)                          |
| augustus_masked-6-processed-gene-139.11-mRNA-1 | Japonica | NA       |        |              | OsR498G0815996300.01.T02 | Hydroxyproline-rich glycoprotein-like                                   |
| augustus_masked-6-processed-gene-139.6-mRNA-1  | Japonica | NA       |        | Os06g0349800 | OsR498G0612504300.01.T01 |                                                                         |
| augustus_masked-6-processed-gene-140.31-mRNA-1 | Japonica | NA       |        | Os06g0352200 | OsR498G0612495900.01.T01 | DUF679 domain membrane protein 7                                        |
| augustus_masked-6-processed-gene-141.10-mRNA-1 | Japonica | NA       |        | Os06g0352900 | OsR498G0612492500.01.T02 | Chloroplast protein HCF243                                              |
| augustus_masked-6-processed-gene-142.11-mRNA-1 | Japonica | NA       |        | Os06g0354601 | OsR498G0612489400.01.T01 |                                                                         |
| augustus_masked-6-processed-gene-142.12-mRNA-1 | Japonica | NA       |        | Os06g0354700 | OsR498G0612488000.01.T03 | Pheophytinase, chloroplastic                                            |
| augustus_masked-6-processed-gene-144.0-mRNA-1  | Japonica | NA       |        | Os12g0468900 | OsR498G0713579700.01.T01 | Cell wall protein-like                                                  |
| augustus_masked-6-processed-gene-147.12-mRNA-1 | Japonica | NA       |        | Os06g0362100 |                          |                                                                         |
| augustus_masked-6-processed-gene-154.8-mRNA-1  | Japonica | NA       |        | Os06g0468300 | OsR498G0612438500.01.T06 | Putative RING zinc finger domain superfamily protein isoform 1          |
| augustus_masked-6-processed-gene-155.23-mRNA-1 | Japonica | NA       |        |              |                          |                                                                         |
| augustus_masked-6-processed-gene-156.17-mRNA-1 | Japonica | NA       |        | Os06g0472700 | OsR498G0612396600.01.T01 | WRKY transcription factor                                               |
| augustus_masked-6-processed-gene-156.9-mRNA-1  | Japonica | Indica   |        | Os06g0472300 | OsR498G0612388200.01.T02 | Pentatricopeptide repeat-containing protein mitochondrial               |
| augustus_masked-6-processed-gene-157.11-mRNA-1 | Japonica | NA       |        | Os06g0473800 | OsR498G0612402300.01.T01 | Oleosin Zm-II                                                           |
| augustus_masked-6-processed-gene-158.0-mRNA-1  | Japonica | NA       |        | Os06g0474300 | OsR498G0612405300.01.T01 | S-adenosyl-L-methionine-dependent methyltransferase superfamily protein |
| augustus_masked-6-processed-gene-159.18-mRNA-1 | Japonica | NA       |        | Os06g0476800 |                          |                                                                         |
| augustus_masked-6-processed-gene-159.19-mRNA-1 | Japonica | Japonica |        | Os06g0476900 | OsR498G0714121500.01.T06 |                                                                         |
| augustus_masked-6-processed-gene-161.0-mRNA-1  | Japonica | NA       |        | Os06g0478100 |                          |                                                                         |
| augustus_masked-6-processed-gene-161.13-mRNA-1 | Japonica | NA       | LRR-TM | Os06g0478600 | OsR498G0612420500.01.T01 | Leucine-rich repeat receptor-like serine/threonine-protein kinase BAM2  |
| augustus_masked-6-processed-gene-161.23-mRNA-1 | Japonica | NA       |        | Os06g0479233 |                          |                                                                         |
| augustus_masked-6-processed-gene-166.12-mRNA-1 | Japonica | Indica   |        | Os06g0114366 | OsR498G0612361200.01.T01 | Selenium-binding protein-like                                           |
| augustus_masked-6-processed-gene-167.37-mRNA-1 | Japonica | NA       |        | Os07g0561900 | OsR498G0102180600.01.T01 | Peptide transporter PTR1                                                |
| augustus_masked-6-processed-gene-168.19-mRNA-1 | Japonica | NA       |        |              | OsR498G0408540300.01.T01 |                                                                         |
| augustus_masked-6-processed-gene-168.7-mRNA-1  | Japonica | NA       |        | Os06g0490000 | OsR498G0612352500.01.T02 | rRNA adenine N(6)-methyltransferase                                     |
| augustus_masked-6-processed-gene-169.22-mRNA-1 | Japonica | NA       |        |              | OsR498G0612342000.01.T01 |                                                                         |
| augustus_masked-6-processed-gene-170.19-mRNA-1 | Japonica | NA       |        | Os06g0493800 | OsR498G0612334700.01.T04 | Pentatricopeptide repeat-containing protein                             |
| augustus_masked-6-processed-gene-171.20-mRNA-1 | Japonica | NA       |        | Os06g0494700 | OsR498G0612329400.01.T01 | Protein DETOXIFICATION                                                  |
| augustus_masked-6-processed-gene-171.7-mRNA-1  | Japonica | NA       |        | Os06g0494000 | OsR498G0612334000.01.T02 | Paired amphipathic helix repeat-containing family protein               |
| augustus_masked-6-processed-gene-174.1-mRNA-1  | Japonica | NA       |        | Os06g0498150 |                          |                                                                         |
| augustus_masked-6-processed-gene-174.2-mRNA-1  | Japonica | NA       |        | Os01g0726000 | OsR498G0917309200.01.T01 |                                                                         |
| augustus_masked-6-processed-gene-176.24-mRNA-1 | Japonica | NA       |        | Os06g0501900 | OsR498G0612571700.01.T01 |                                                                         |



|                                                |          |          |               |              |                          |                                                                            |
|------------------------------------------------|----------|----------|---------------|--------------|--------------------------|----------------------------------------------------------------------------|
| augustus_masked-6-processed-gene-177.4-mRNA-1  | Japonica | NA       |               | Os06g0502900 | OsR498G0612566000.01.T02 | Putative WRKY transcription factor                                         |
| augustus_masked-6-processed-gene-178.10-mRNA-1 | Japonica | NA       |               | Os06g0504100 |                          |                                                                            |
| augustus_masked-6-processed-gene-179.1-mRNA-1  | Japonica | NA       |               |              |                          | Arabinogalactan peptide                                                    |
| augustus_masked-6-processed-gene-179.11-mRNA-1 | Japonica | NA       |               | Os06g0506100 | OsR498G0612587700.01.T03 | Pentatricopeptide repeat-containing protein, mitochondrial                 |
| augustus_masked-6-processed-gene-180.0-mRNA-1  | Japonica | NA       |               | Os06g0507101 | OsR498G0612592000.01.T01 | Prolamin                                                                   |
| augustus_masked-6-processed-gene-180.1-mRNA-1  | Japonica | NA       |               | Os06g0507300 | OsR498G0612592400.01.T01 | BTB domain-containing protein                                              |
| augustus_masked-6-processed-gene-180.20-mRNA-1 | Japonica | NA       |               |              | OsR498G0612594200.01.T01 | Intracellular protein transport protein USO1-related                       |
| augustus_masked-6-processed-gene-189.11-mRNA-1 | Japonica | NA       |               |              | OsR498G1221584400.01.T01 |                                                                            |
| augustus_masked-6-processed-gene-190.9-mRNA-1  | Japonica | NA       |               |              |                          | Eukaryotic translation initiation factor isoform 4G-2                      |
| augustus_masked-6-processed-gene-191.10-mRNA-1 | Japonica | NA       |               |              |                          | Plant cadmium resistance protein                                           |
| augustus_masked-6-processed-gene-191.31-mRNA-1 | Japonica | Indica   |               | Os12g0119800 | OsR498G0612633600.01.T01 | Harpin-induced protein 1 containing protein, expressed                     |
| augustus_masked-6-processed-gene-192.18-mRNA-1 | Japonica | Indica   |               | Os06g0523100 | OsR498G0612638500.01.T03 | WRKY transcription factor                                                  |
| augustus_masked-6-processed-gene-193.7-mRNA-1  | Japonica | NA       |               | Os06g0523300 | OsR498G0612640000.01.T01 | Nucleotide-sugar transporter                                               |
| augustus_masked-6-processed-gene-193.8-mRNA-1  | Japonica | NA       |               | Os06g0523400 | OsR498G0612640400.01.T06 | Nucleotide-sugar transporter                                               |
| augustus_masked-6-processed-gene-194.3-mRNA-1  | Japonica | NA       |               |              | OsR498G0612647700.01.T01 |                                                                            |
| augustus_masked-6-processed-gene-196.4-mRNA-1  | Japonica | Japonica |               | Os06g0528700 | OsR498G0100964300.01.T01 | Flavin-containing monooxygenase                                            |
| augustus_masked-6-processed-gene-199.12-mRNA-1 | Japonica | Japonica |               | Os06g0534900 | OsR498G0612688700.01.T01 | RING-H2 finger protein ATL22                                               |
| augustus_masked-6-processed-gene-199.22-mRNA-1 | Japonica | NA       |               | Os12g0550700 |                          | Transposon protein, putative, Pong sub-class, expressed                    |
| augustus_masked-6-processed-gene-199.9-mRNA-1  | Japonica | NA       |               | Os06g0534800 | OsR498G0612688300.01.T01 | E3 ubiquitin-protein ligase ATL6                                           |
| augustus_masked-6-processed-gene-2.13-mRNA-1   | Japonica | NA       |               |              | OsR498G0611471700.01.T01 | CCT domain-containing protein                                              |
| augustus_masked-6-processed-gene-2.14-mRNA-1   | Japonica | Japonica |               | Os06g0103200 | OsR498G1119695000.01.T01 | N-hydroxycinnamoyl benzoyltransferase-like protein                         |
| augustus_masked-6-processed-gene-200.10-mRNA-1 | Japonica | NA       |               |              | OsR498G0612691300.01.T01 | Zinc finger, RING/FYVE/PHD-type                                            |
| augustus_masked-6-processed-gene-200.12-mRNA-1 | Japonica | NA       |               |              | OsR498G0612692100.01.T01 | Poly(A)-specific ribonuclease                                              |
| augustus_masked-6-processed-gene-208.2-mRNA-1  | Japonica | Indica   |               | Os02g0232900 | OsR498G0612734500.01.T01 | Aquaporin NIP-type like                                                    |
| augustus_masked-6-processed-gene-209.17-mRNA-1 | Japonica | NA       |               |              | OsR498G0612740100.01.T01 | Dehydration-responsive element-binding protein 3                           |
| augustus_masked-6-processed-gene-209.35-mRNA-1 | Japonica | NA       |               | Os06g0554300 | OsR498G0612743600.01.T03 | Dentin sialophosphoprotein-like                                            |
| augustus_masked-6-processed-gene-209.36-mRNA-1 | Japonica | NA       |               | Os06g0554600 | OsR498G0612745200.01.T01 |                                                                            |
| augustus_masked-6-processed-gene-210.24-mRNA-1 | Japonica | Indica   |               | Os06g0556200 | OsR498G0612751900.01.T01 | Amino acid permease 1                                                      |
| augustus_masked-6-processed-gene-211.22-mRNA-1 | Japonica | Japonica | LRR-TM        | Os06g0557400 | OsR498G0612758000.01.T01 | LRR receptor-like serine/threonine-protein kinase HSL2                     |
| augustus_masked-6-processed-gene-211.24-mRNA-1 | Japonica | NA       |               |              | OsR498G0612760200.01.T01 | Protein DETOXIFICATION                                                     |
| augustus_masked-6-processed-gene-214.4-mRNA-1  | Japonica | NA       |               | Os06g0562200 | OsR498G0612770700.01.T01 | Abscisic acid receptor PYL 2                                               |
| augustus_masked-6-processed-gene-215.35-mRNA-1 | Japonica | NA       |               | Os06g0564000 |                          |                                                                            |
| augustus_masked-6-processed-gene-216.0-mRNA-1  | Japonica | Japonica |               | Os06g0565000 | OsR498G0612787500.01.T02 | Putative fertility restorer homologue                                      |
| augustus_masked-6-processed-gene-217.12-mRNA-1 | Japonica | NA       |               | Os06g0567000 | OsR498G0612796100.01.T01 | Dolichyl-diphosphooligosaccharide-protein glycosyltransferase subunit OST3 |
| augustus_masked-6-processed-gene-217.26-mRNA-1 | Japonica | NA       |               |              | OsR498G0100560400.01.T01 |                                                                            |
| augustus_masked-6-processed-gene-218.16-mRNA-1 | Japonica | Japonica |               | Os06g0568800 | OsR498G0612797900.01.T01 | SWIM-type domain-containing protein                                        |
| augustus_masked-6-processed-gene-218.17-mRNA-1 | Japonica | Japonica |               | Os06g0569300 | OsR498G0816542100.01.T01 |                                                                            |
| augustus_masked-6-processed-gene-218.31-mRNA-1 | Japonica | NA       |               | Os06g0568600 | OsR498G0612797400.01.T01 | Ent-kaurene oxidase                                                        |
| augustus_masked-6-processed-gene-220.23-mRNA-1 | Japonica | Japonica |               | Os06g0572000 | OsR498G0916743100.01.T07 |                                                                            |
| augustus_masked-6-processed-gene-221.22-mRNA-1 | Japonica | NA       |               | Os06g0573700 | OsR498G0612810500.01.T02 |                                                                            |
| augustus_masked-6-processed-gene-222.36-mRNA-1 | Japonica | Indica   |               | Os04g0205200 | OsR498G0612819600.01.T01 | Disease resistance protein RPM1                                            |
| augustus_masked-6-processed-gene-226.0-mRNA-1  | Japonica | NA       | Kinase-LRR-TM |              |                          | U-box domain-containing protein 33-like isoform X1                         |
| augustus_masked-6-processed-gene-227.33-mRNA-1 | Japonica | NA       |               |              | OsR498G0204046800.01.T01 | Epstein-Barr virus EBNA-1-like                                             |
| augustus_masked-6-processed-gene-231.29-mRNA-1 | Japonica | Indica   | Kinase-LRR-TM | Os06g0587500 | OsR498G0612856100.01.T01 | Leucine-rich repeat protein kinase family protein                          |
| augustus_masked-6-processed-gene-231.42-mRNA-1 | Japonica | NA       |               | Os06g0588900 | OsR498G0612856600.01.T02 | CTLH domain-containing protein                                             |
| augustus_masked-6-processed-gene-233.1-mRNA-1  | Japonica | NA       |               | Os06g0591701 |                          |                                                                            |
| augustus_masked-6-processed-gene-233.37-mRNA-1 | Japonica | NA       |               | Os06g0593800 | OsR498G0612872400.01.T01 | Glycosyltransferase                                                        |
| augustus_masked-6-processed-gene-234.17-mRNA-1 | Japonica | Japonica | CC-NBS-TM     | Os06g0594200 | OsR498G0612874800.01.T01 | Putative disease resistance RPP13-like protein 1                           |
| augustus_masked-6-processed-gene-236.14-mRNA-1 | Japonica | NA       |               | Os06g0598800 | OsR498G0612885700.01.T02 | Very-long-chain 3-oxoacyl-CoA synthase                                     |
| augustus_masked-6-processed-gene-237.8-mRNA-1  | Japonica | NA       |               | Os06g0600400 | OsR498G0612888300.01.T01 | Secologanin synthase                                                       |
| augustus_masked-6-processed-gene-238.11-mRNA-1 | Japonica | NA       |               | Os06g0602400 | OsR498G0612892900.01.T01 | DEAD-box ATP-dependent RNA helicase 52                                     |
| augustus_masked-6-processed-gene-238.19-mRNA-1 | Japonica | NA       | Kinase-TM     | Os06g0602500 | OsR498G0612893400.01.T01 | Non-specific serine/threonine protein kinase                               |
| augustus_masked-6-processed-gene-239.21-mRNA-1 | Japonica | NA       |               |              | OsR498G0612897600.01.T03 | RNA polymerase Rpc34 subunit family protein                                |
| augustus_masked-6-processed-gene-241.41-mRNA-1 | Japonica | NA       |               | Os06g0607100 | OsR498G0612914100.01.T01 | Phosphatidic acid phosphatase-related /PAP2-related                        |
| augustus_masked-6-processed-gene-241.49-mRNA-1 | Japonica | NA       |               | Os06g0606800 | OsR498G0612911400.01.T03 | TPX2 domain-containing protein                                             |
| augustus_masked-6-processed-gene-243.13-mRNA-1 | Japonica | NA       |               |              | OsR498G0612922300.01.T01 | Lateral suppressor                                                         |
| augustus_masked-6-processed-gene-244.40-mRNA-1 | Japonica | Japonica |               | Os06g0611200 | OsR498G0612925400.01.T01 | Pentatricopeptide (PPR) repeat-containing protein-like                     |
| augustus_masked-6-processed-gene-245.16-mRNA-1 | Japonica | NA       |               | Os06g0612800 | OsR498G0612933300.01.T05 | Stress-associated protein 8                                                |
| augustus_masked-6-processed-gene-246.2-mRNA-1  | Japonica | Japonica |               | Os06g0614400 | OsR498G1019138600.01.T01 |                                                                            |
| augustus_masked-6-processed-gene-247.13-mRNA-1 | Japonica | Japonica |               | Os06g0616900 | OsR498G0101162300.01.T01 |                                                                            |
| augustus_masked-6-processed-gene-247.6-mRNA-1  | Japonica | NA       |               |              |                          |                                                                            |

|                                                |          |          |               |              |                          |                                                                        |
|------------------------------------------------|----------|----------|---------------|--------------|--------------------------|------------------------------------------------------------------------|
| augustus_masked-6-processed-gene-248.39-mRNA-1 | Japonica | NA       |               | Os06g0618700 | OsR498G0612961000.01.T01 | VQ motif-containing protein 25                                         |
| augustus_masked-6-processed-gene-250.13-mRNA-1 | Japonica | NA       |               |              | OsR498G0612968300.01.T01 |                                                                        |
| augustus_masked-6-processed-gene-251.1-mRNA-1  | Japonica | Indica   |               | Os07g0543600 | OsR498G0612972300.01.T01 | Putative strictosidine synthase                                        |
| augustus_masked-6-processed-gene-251.7-mRNA-1  | Japonica | Indica   |               | Os07g0543600 | OsR498G0612972200.01.T01 | Strictosidine synthase 1                                               |
| augustus_masked-6-processed-gene-252.18-mRNA-1 | Japonica | NA       |               | Os06g0624900 | OsR498G0612977500.01.T03 | PLATZ transcription factor family protein isoform 2                    |
| augustus_masked-6-processed-gene-252.19-mRNA-1 | Japonica | Indica   |               | Os06g0625000 | OsR498G0612978300.01.T01 |                                                                        |
| augustus_masked-6-processed-gene-253.26-mRNA-1 | Japonica | NA       |               | Os06g0626600 | OsR498G0612988400.01.T01 | Sulfotransferase                                                       |
| augustus_masked-6-processed-gene-253.28-mRNA-1 | Japonica | NA       |               |              | OsR498G0612989000.01.T01 |                                                                        |
| augustus_masked-6-processed-gene-254.49-mRNA-1 | Japonica | NA       |               | Os06g0627400 | OsR498G0612992400.01.T01 |                                                                        |
| augustus_masked-6-processed-gene-255.13-mRNA-1 | Japonica | NA       | LRR-TM        | Os06g0627500 | OsR498G0612993000.01.T01 | piriformospora indica-insensitive protein 2                            |
| augustus_masked-6-processed-gene-258.14-mRNA-1 | Japonica | NA       |               | Os06g0633900 | OsR498G0613018300.01.T02 | Alpha/beta hydrolase fold                                              |
| augustus_masked-6-processed-gene-258.27-mRNA-1 | Japonica | NA       |               |              | OsR498G0613017200.01.T01 | RING-type E3 ubiquitin transferase                                     |
| augustus_masked-6-processed-gene-259.35-mRNA-1 | Japonica | NA       |               | Os06g0634300 | OsR498G0613019800.01.T03 | MutT domain protein-like                                               |
| augustus_masked-6-processed-gene-260.2-mRNA-1  | Japonica | NA       |               |              | OsR498G0917172900.01.T01 | DUF834 domain-containing protein                                       |
| augustus_masked-6-processed-gene-261.16-mRNA-1 | Japonica | NA       |               | Os06g0639300 | OsR498G0613035300.01.T01 | Methyltransferase-like protein 22                                      |
| augustus_masked-6-processed-gene-261.17-mRNA-1 | Japonica | NA       | Kinase-TM     | Os06g0639500 | OsR498G0613036700.01.T01 | E3 ubiquitin-protein ligase KEG                                        |
| augustus_masked-6-processed-gene-288.54-mRNA-1 | Japonica | NA       |               | Os06g0687200 | OsR498G0613210300.01.T01 | Peptidoglycan glycosyltransferase FtsW                                 |
| augustus_masked-6-processed-gene-289.25-mRNA-1 | Japonica | NA       |               | Os06g0690100 |                          |                                                                        |
| augustus_masked-6-processed-gene-289.27-mRNA-1 | Japonica | NA       |               |              | OsR498G0613217300.01.T01 |                                                                        |
| augustus_masked-6-processed-gene-289.7-mRNA-1  | Japonica | Indica   |               | Os09g0472900 | OsR498G0613213400.01.T01 | Expansin-like EG45 domain-containing protein (Fragment)                |
| augustus_masked-6-processed-gene-289.8-mRNA-1  | Japonica | Indica   |               | Os09g0472900 | OsR498G0613213600.01.T01 | Expansin-like EG45 domain-containing protein (Fragment)                |
| augustus_masked-6-processed-gene-290.36-mRNA-1 | Japonica | Indica   | Kinase-LRR-TM | Os06g0692600 | OsR498G0613224200.01.T01 | Tyrosine-sulfated glycopeptide receptor 1                              |
| augustus_masked-6-processed-gene-290.37-mRNA-1 | Japonica | NA       | Kinase-LRR-TM | Os06g0692600 | OsR498G0613225000.01.T01 | Tyrosine-sulfated glycopeptide receptor 1                              |
| augustus_masked-6-processed-gene-290.7-mRNA-1  | Japonica | Japonica |               | Os06g0690900 | OsR498G0613218100.01.T02 | Pentatricopeptide repeat-containing protein                            |
| augustus_masked-6-processed-gene-290.8-mRNA-1  | Japonica | NA       |               | Os06g0691100 | OsR498G0613218700.01.T01 | Ethylene-responsive transcription factor 3                             |
| augustus_masked-6-processed-gene-290.9-mRNA-1  | Japonica | NA       |               | Os06g0691200 | OsR498G0613219300.01.T02 | thaumatin-like protein isoform X1                                      |
| augustus_masked-6-processed-gene-291.11-mRNA-1 | Japonica | NA       |               | Os06g0693700 | OsR498G0613228500.01.T01 | C2H2-type domain-containing protein (Fragment)                         |
| augustus_masked-6-processed-gene-291.33-mRNA-1 | Japonica | Japonica |               | Os06g0694600 | OsR498G0613230800.01.T01 | Pentatricopeptide repeat                                               |
| augustus_masked-6-processed-gene-292.26-mRNA-1 | Japonica | NA       |               | Os06g0695700 | OsR498G0613235300.01.T01 | Homeobox protein ARX-like                                              |
| augustus_masked-6-processed-gene-292.34-mRNA-1 | Japonica | NA       |               | Os06g0695900 | OsR498G0613236200.01.T01 | Anaphase-promoting complex subunit 11 RING-H2 finger protein           |
| augustus_masked-6-processed-gene-296.16-mRNA-1 | Japonica | NA       |               |              | OsR498G0203878000.01.T01 | Cell wall protein-like                                                 |
| augustus_masked-6-processed-gene-297.9-mRNA-1  | Japonica | NA       |               | Os06g0702100 | OsR498G0613261700.01.T03 | Methyl-CpG-binding domain-containing protein 2                         |
| augustus_masked-6-processed-gene-3.1-mRNA-1    | Japonica | NA       |               | Os06g0104100 | OsR498G0611474500.01.T01 | NADH dehydrogenasecomplex I, assembly factor 6 like                    |
| augustus_masked-6-processed-gene-3.22-mRNA-1   | Japonica | NA       |               | Os06g0104900 | OsR498G0611476400.01.T01 | L-lactate dehydrogenase A                                              |
| augustus_masked-6-processed-gene-308.31-mRNA-1 | Japonica | NA       |               |              | OsR498G0511427100.01.T01 | Epstein-Barr virus EBNA-1-like                                         |
| augustus_masked-6-processed-gene-308.41-mRNA-1 | Japonica | NA       |               |              | OsR498G0511427100.01.T01 | Epstein-Barr virus EBNA-1-like                                         |
| augustus_masked-6-processed-gene-4.0-mRNA-1    | Japonica | Indica   |               | Os06g0105200 | OsR498G0611477700.01.T01 | GRAS transcription factor                                              |
| augustus_masked-6-processed-gene-4.29-mRNA-1   | Japonica | NA       |               | Os06g0106900 | OsR498G0611482600.01.T02 | MADS-box transcription factor 8                                        |
| augustus_masked-6-processed-gene-4.4-mRNA-1    | Japonica | NA       | Kinase-TM     |              | OsR498G0611477400.01.T01 | Receptor-like serine/threonine-protein kinase                          |
| augustus_masked-6-processed-gene-4.5-mRNA-1    | Japonica | NA       |               | Os06g0105400 | OsR498G0611478000.01.T02 | Dihydrolipoamide acetyltransferase component of pyruvate dehydrogenase |
| augustus_masked-6-processed-gene-43.0-mRNA-1   | Japonica | NA       |               | Os06g0184400 | OsR498G0611736100.01.T01 | C2 tensin-type domain-containing protein                               |
| augustus_masked-6-processed-gene-46.60-mRNA-1  | Japonica | NA       |               |              | OsR498G0611752600.01.T01 |                                                                        |
| augustus_masked-6-processed-gene-47.12-mRNA-1  | Japonica | Japonica | Kinase-TM     | Os06g0191300 | OsR498G0204906600.01.T01 | MAP kinase kinase                                                      |
| augustus_masked-6-processed-gene-47.20-mRNA-1  | Japonica | NA       |               |              | OsR498G0611760900.01.T01 |                                                                        |
| augustus_masked-6-processed-gene-47.21-mRNA-1  | Japonica | NA       |               | Os06g0192800 | OsR498G0611761500.01.T01 | RING-H2 finger protein ATL60                                           |
| augustus_masked-6-processed-gene-47.6-mRNA-1   | Japonica | NA       |               | Os04g0471100 | OsR498G0510159400.01.T01 | Transposon protein, putative, CACTA, En/Spm sub-class, expressed       |
| augustus_masked-6-processed-gene-48.23-mRNA-1  | Japonica | NA       |               |              |                          |                                                                        |
| augustus_masked-6-processed-gene-48.3-mRNA-1   | Japonica | NA       |               | Os06g0193200 | OsR498G0611762700.01.T02 | Pectinesterase                                                         |
| augustus_masked-6-processed-gene-49.13-mRNA-1  | Japonica | NA       |               |              | OsR498G0511427100.01.T01 | Epstein-Barr virus EBNA-1-like                                         |
| augustus_masked-6-processed-gene-5.39-mRNA-1   | Japonica | NA       |               | Os06g0109000 | OsR498G0611488200.01.T03 | Phosphoglycerate mutase-like protein AT74                              |
| augustus_masked-6-processed-gene-5.41-mRNA-1   | Japonica | Japonica |               | Os06g0109500 | OsR498G0611490800.01.T01 | Haloacid dehalogenase-like hydrolase domain-containing protein Sgpp    |
| augustus_masked-6-processed-gene-6.1-mRNA-1    | Japonica | NA       |               | Os02g0540000 | OsR498G1019218100.01.T01 | RING-type domain-containing protein                                    |
| augustus_masked-6-processed-gene-6.12-mRNA-1   | Japonica | NA       |               | Os06g0111200 | OsR498G0611495300.01.T01 | DUF295 domain-containing protein                                       |
| augustus_masked-6-processed-gene-6.13-mRNA-1   | Japonica | NA       |               | Os06g0111500 | OsR498G0611496300.01.T02 | 6-phosphogluconate dehydrogenase, decarboxylating                      |
| augustus_masked-6-processed-gene-6.27-mRNA-1   | Japonica | NA       |               | Os06g0111100 | OsR498G0611495200.01.T01 | DUF295 domain-containing protein                                       |
| augustus_masked-6-processed-gene-6.8-mRNA-1    | Japonica | NA       |               | Os06g0110200 | OsR498G0611494100.01.T01 | 18 kDa seed maturation protein-like                                    |
| augustus_masked-6-processed-gene-65.20-mRNA-1  | Japonica | Japonica |               | Os06g0223000 | OsR498G0611882900.01.T01 | t-SNARE coiled-coil homology domain-containing protein (Fragment)      |
| augustus_masked-6-processed-gene-65.35-mRNA-1  | Japonica | Indica   |               | Os02g0751800 | OsR498G0611883600.01.T01 | Phosphoglycerate mutase                                                |
| augustus_masked-6-processed-gene-7.27-mRNA-1   | Japonica | NA       |               | Os06g0112000 | OsR498G0611498500.01.T01 | Pentatricopeptide repeat-containing protein chloroplastic              |
| augustus_masked-6-processed-gene-74.22-mRNA-1  | Japonica | NA       |               | Os06g0238000 | OsR498G0611967700.01.T01 | RING-type E3 ubiquitin transferase                                     |
| augustus_masked-6-processed-gene-74.39-mRNA-1  | Japonica | NA       |               | Os06g0239100 | OsR498G0611970300.01.T01 | Metalloendoproteinase 2-MMP                                            |

|                                                |          |          |               |              |                          |                                                                |
|------------------------------------------------|----------|----------|---------------|--------------|--------------------------|----------------------------------------------------------------|
| augustus_masked-6-processed-gene-74.44-mRNA-1  | Japonica | NA       |               | Os10g0460000 | OsR498G0204348500.01.T01 |                                                                |
| augustus_masked-6-processed-gene-74.55-mRNA-1  | Japonica | NA       |               | Os06g0238900 | OsR498G0611970000.01.T02 | TMV response protein                                           |
| augustus_masked-6-processed-gene-75.5-mRNA-1   | Japonica | Indica   |               | Os06g0240800 | OsR498G0611972800.01.T01 | Acetylserotonin O-methyltransferase 1                          |
| augustus_masked-6-processed-gene-79.7-mRNA-1   | Japonica | NA       |               |              | OsR498G0611999800.01.T01 | F-box domain-containing protein (Fragment)                     |
| augustus_masked-6-processed-gene-85.4-mRNA-1   | Japonica | NA       |               |              | OsR498G1220782800.01.T03 |                                                                |
| augustus_masked-6-processed-gene-86.15-mRNA-1  | Japonica | Japonica |               | Os06g0262200 | OsR498G0612046000.01.T01 | 3-ketoacyl-CoA synthase                                        |
| augustus_masked-6-processed-gene-87.22-mRNA-1  | Japonica | NA       |               |              |                          |                                                                |
| augustus_masked-6-processed-gene-87.24-mRNA-1  | Japonica | NA       |               | Os06g0263400 | OsR498G0612054600.01.T01 | Very-long-chain 3-oxoacyl-CoA synthase                         |
| augustus_masked-6-processed-gene-87.3-mRNA-1   | Japonica | Japonica |               | Os06g0262800 | OsR498G0612046000.01.T01 | Very-long-chain 3-oxoacyl-CoA synthase                         |
| augustus_masked-6-processed-gene-88.8-mRNA-1   | Japonica | Japonica |               | Os06g0264200 | OsR498G0612055300.01.T01 | NADH2 dehydrogenase family protein                             |
| augustus_masked-6-processed-gene-98.31-mRNA-1  | Japonica | NA       |               | Os06g0283400 | OsR498G0612143000.01.T01 | Phosphatidylinositol 4-kinase type 2-beta                      |
| augustus_masked-7-processed-gene-105.9-mRNA-1  | Japonica | NA       |               |              |                          |                                                                |
| augustus_masked-7-processed-gene-124.33-mRNA-1 | Japonica | NA       |               |              | OsR498G0714084500.01.T06 | D-ribulose kinase                                              |
| augustus_masked-7-processed-gene-133.32-mRNA-1 | Japonica | NA       |               |              | OsR498G0714134600.01.T01 |                                                                |
| augustus_masked-7-processed-gene-155.25-mRNA-1 | Japonica | NA       |               |              | OsR498G0714217800.01.T01 | Phosphatidylinositol/phosphatidylcholine transfer protein SFH5 |
| augustus_masked-7-processed-gene-168.25-mRNA-1 | Japonica | NA       |               |              |                          | PMD domain-containing protein (Fragment)                       |
| augustus_masked-7-processed-gene-253.24-mRNA-1 | Japonica | NA       |               | Os07g0619200 | OsR498G0714765300.01.T03 | Polcalcin Syr v 3-like                                         |
| augustus_masked-7-processed-gene-262.50-mRNA-1 | Japonica | NA       |               | Os08g0487300 | OsR498G0102102900.01.T01 | Transposon protein, putative, Mutator sub-class, expressed     |
| augustus_masked-7-processed-gene-269.9-mRNA-1  | Japonica | NA       |               |              | OsR498G0714866500.01.T01 |                                                                |
| augustus_masked-7-processed-gene-6.31-mRNA-1   | Japonica | NA       |               |              |                          | Fusarium resistance protein I2C-5-like                         |
| augustus_masked-7-processed-gene-74.35-mRNA-1  | Japonica | NA       |               | Os07g0240600 | OsR498G0713860700.01.T01 | DIMBOA UDP-glucosyltransferase BX9                             |
| augustus_masked-7-processed-gene-89.22-mRNA-1  | Japonica | NA       |               | Os07g0264000 | OsR498G0713942500.01.T04 |                                                                |
| augustus_masked-7-processed-gene-96.9-mRNA-1   | Japonica | NA       |               |              | OsR498G0713968800.01.T03 | GlcNAc-PI synthesis protein (Fragment)                         |
| augustus_masked-8-processed-gene-1.7-mRNA-1    | Japonica | NA       |               | Os08g0101500 | OsR498G0815025500.01.T01 | Molybdate transporter like                                     |
| augustus_masked-8-processed-gene-12.1-mRNA-1   | Japonica | NA       |               |              | OsR498G0305908100.01.T01 |                                                                |
| augustus_masked-8-processed-gene-12.13-mRNA-1  | Japonica | NA       |               | Os08g0120900 |                          |                                                                |
| augustus_masked-8-processed-gene-151.29-mRNA-1 | Japonica | NA       | Kinase-LRR-TM |              | OsR498G0815800700.01.T01 | LRR receptor-like serine/threonine-protein kinase EFR          |
| augustus_masked-8-processed-gene-153.20-mRNA-1 | Japonica | NA       |               |              | OsR498G0815809900.01.T01 |                                                                |
| augustus_masked-8-processed-gene-17.55-mRNA-1  | Japonica | NA       |               | Os08g0128000 | OsR498G0815106700.01.T03 | Galactose oxidase/kelch repeat superfamily protein             |
| augustus_masked-8-processed-gene-17.59-mRNA-1  | Japonica | NA       |               | Os08g0128700 | OsR498G0815108100.01.T01 | BTB/POZ domain-containing protein At1g55760                    |
| augustus_masked-8-processed-gene-18.47-mRNA-1  | Japonica | Indica   |               | Os08g0131200 | OsR498G0815118100.01.T01 | AAI domain-containing protein                                  |
| augustus_masked-8-processed-gene-2.1-mRNA-1    | Japonica | NA       |               |              | OsR498G0815028100.01.T01 | Transcription repressor                                        |
| augustus_masked-8-processed-gene-2.8-mRNA-1    | Japonica | Japonica |               | Os08g0102800 | OsR498G0713661400.01.T01 |                                                                |
| augustus_masked-8-processed-gene-205.21-mRNA-1 | Japonica | NA       |               | Os08g0402100 | OsR498G0816036700.01.T01 | LOB domain-containing protein 22                               |
| augustus_masked-8-processed-gene-209.19-mRNA-1 | Japonica | NA       |               | Os08g0409500 | OsR498G0816066900.01.T01 | VQ domain-containing protein (Fragment)                        |
| augustus_masked-8-processed-gene-209.5-mRNA-1  | Japonica | NA       |               | Os08g0408500 | OsR498G0816061900.01.T01 | AP domain DRE binding factor                                   |
| augustus_masked-8-processed-gene-210.0-mRNA-1  | Japonica | Indica   |               | Os08g0410300 | OsR498G0816070500.01.T01 | Carbohydrate transporter/ sugar porter/ transporter            |
| augustus_masked-8-processed-gene-211.17-mRNA-1 | Japonica | NA       |               | Os07g0579000 | OsR498G0714629300.01.T01 | AP2/ERF transcription factor                                   |
| augustus_masked-8-processed-gene-211.3-mRNA-1  | Japonica | Indica   |               | Os08g0413100 | OsR498G0816078500.01.T01 |                                                                |
| augustus_masked-8-processed-gene-212.16-mRNA-1 | Japonica | NA       |               | Os08g0415600 | OsR498G0816084700.01.T01 | RING-type E3 ubiquitin transferase                             |
| augustus_masked-8-processed-gene-214.23-mRNA-1 | Japonica | Japonica |               | Os08g0419100 | OsR498G0816093100.01.T01 |                                                                |
| augustus_masked-8-processed-gene-214.34-mRNA-1 | Japonica | NA       |               |              | OsR498G0816095500.01.T01 |                                                                |
| augustus_masked-8-processed-gene-217.0-mRNA-1  | Japonica | NA       | NBS-TM        | Os08g0424700 |                          | NB-ARC domain-containing protein                               |
| augustus_masked-8-processed-gene-22.53-mRNA-1  | Japonica | Japonica |               | Os08g0137900 | OsR498G0815137300.01.T01 | Phytoecyanin domain-containing protein (Fragment)              |
| augustus_masked-8-processed-gene-220.17-mRNA-1 | Japonica | NA       |               |              | OsR498G0816130300.01.T01 |                                                                |
| augustus_masked-8-processed-gene-229.14-mRNA-1 | Japonica | NA       |               | Os08g0443800 | OsR498G0816189900.01.T01 | Putative senescence-associated protein 5                       |
| augustus_masked-8-processed-gene-23.0-mRNA-1   | Japonica | NA       |               | Os08g0138200 | OsR498G0815138300.01.T01 | Phytoecyanin domain-containing protein (Fragment)              |
| augustus_masked-8-processed-gene-233.2-mRNA-1  | Japonica | Indica   |               | Os05g0350900 | OsR498G0816216500.01.T01 | R2R3-MYB transcription factor MYB7                             |
| augustus_masked-8-processed-gene-234.10-mRNA-1 | Japonica | NA       |               | Os08g0452100 | OsR498G0816220900.01.T02 | Subtilisin-like serine protease                                |
| augustus_masked-8-processed-gene-235.25-mRNA-1 | Japonica | Japonica |               | Os08g0453700 | OsR498G0816228700.01.T06 | Respiratory burst oxidase E                                    |
| augustus_masked-8-processed-gene-235.31-mRNA-1 | Japonica | NA       |               | Os08g0454400 | OsR498G0816230500.01.T02 | Peroxidase                                                     |
| augustus_masked-8-processed-gene-236.19-mRNA-1 | Japonica | NA       |               | Os08g0455700 | OsR498G0816233900.01.T01 | Exocyst subunit Exo70 family protein (Fragment)                |
| augustus_masked-8-processed-gene-237.14-mRNA-1 | Japonica | Indica   |               | Os08g0457100 | OsR498G0816237900.01.T01 |                                                                |
| augustus_masked-8-processed-gene-238.9-mRNA-1  | Japonica | NA       |               | Os08g0459400 |                          | DDE Tnp4 domain-containing protein (Fragment)                  |
| augustus_masked-8-processed-gene-240.26-mRNA-1 | Japonica | NA       |               | Os08g0463500 | OsR498G0816258900.01.T01 | Zinc finger protein GIS                                        |
| augustus_masked-8-processed-gene-241.10-mRNA-1 | Japonica | Indica   |               | Os08g0464400 | OsR498G0816261100.01.T01 | RING-type E3 ubiquitin transferase                             |
| augustus_masked-8-processed-gene-241.21-mRNA-1 | Japonica | NA       |               | Os08g0465700 | OsR498G0816264700.01.T02 |                                                                |
| augustus_masked-8-processed-gene-242.18-mRNA-1 | Japonica | NA       |               | Os08g0466200 | OsR498G0816265900.01.T01 | Potassium transporter                                          |
| augustus_masked-8-processed-gene-242.37-mRNA-1 | Japonica | NA       |               | Os08g0467300 | OsR498G0816271500.01.T01 | ENTH domain-containing protein                                 |
| augustus_masked-8-processed-gene-243.13-mRNA-1 | Japonica | Japonica |               | Os08g0467600 | OsR498G0816272300.01.T01 | GLABROUS1 enhancer-binding protein-like                        |
| augustus_masked-8-processed-gene-243.20-mRNA-1 | Japonica | NA       |               | Os08g0468300 |                          |                                                                |

|                                                |          |          |               |              |                          |                                                     |
|------------------------------------------------|----------|----------|---------------|--------------|--------------------------|-----------------------------------------------------|
| augustus_masked-8-processed-gene-243.22-mRNA-1 | Japonica | Japonica |               | Os08g0469000 | OsR498G0816277700.01.T01 | Aspartic proteinase nepenthesin-1                   |
| augustus_masked-8-processed-gene-243.26-mRNA-1 | Japonica | NA       |               |              | OsR498G0816279300.01.T01 |                                                     |
| augustus_masked-8-processed-gene-245.8-mRNA-1  | Japonica | NA       |               | Os08g0472000 | OsR498G0816288900.01.T01 | ABSCISIC ACID-INSENSITIVE 5-like protein 5          |
| augustus_masked-8-processed-gene-246.32-mRNA-1 | Japonica | Indica   |               | Os08g0474000 | OsR498G0816296700.01.T01 | Ethylene-responsive transcription factor ERF109     |
| augustus_masked-8-processed-gene-246.35-mRNA-1 | Japonica | Japonica |               | Os08g0474400 | OsR498G0816363600.01.T01 | Protein transport protein SEC23                     |
| augustus_masked-8-processed-gene-247.16-mRNA-1 | Japonica | Japonica |               | Os08g0475300 | OsR498G0611850100.01.T01 | Putative carboxylesterase 2                         |
| augustus_masked-8-processed-gene-247.20-mRNA-1 | Japonica | NA       |               | Os10g0460000 | OsR498G1019116500.01.T01 |                                                     |
| augustus_masked-8-processed-gene-247.23-mRNA-1 | Japonica | NA       |               | Os08g0476600 | OsR498G0816303700.01.T01 | Plant-specific domain TIGR01570 family protein      |
| augustus_masked-8-processed-gene-248.1-mRNA-1  | Japonica | NA       |               |              | OsR498G0511427100.01.T01 | Epstein-Barr virus EBNA-1-like                      |
| augustus_masked-8-processed-gene-248.18-mRNA-1 | Japonica | NA       |               | Os02g0212975 | OsR498G1019116500.01.T01 | Kinesin heavy chain-like                            |
| augustus_masked-8-processed-gene-248.19-mRNA-1 | Japonica | NA       |               | Os08g0477700 | OsR498G0816307300.01.T01 | J domain-containing protein (Fragment)              |
| augustus_masked-8-processed-gene-249.0-mRNA-1  | Japonica | NA       |               |              |                          |                                                     |
| augustus_masked-8-processed-gene-25.15-mRNA-1  | Japonica | NA       |               | Os08g0142500 | OsR498G0815150600.01.T01 | PMEI domain-containing protein                      |
| augustus_masked-8-processed-gene-25.22-mRNA-1  | Japonica | Japonica |               | Os08g0143600 | OsR498G0815152700.01.T01 | Putative DEFECTIVE IN ANTHR DEHISCENCE1             |
| augustus_masked-8-processed-gene-260.51-mRNA-1 | Japonica | NA       |               | Os08g0500800 | OsR498G0816402300.01.T01 | Ubiquitin and WLM domain-containing metalloprotease |
| augustus_masked-8-processed-gene-262.23-mRNA-1 | Japonica | NA       |               | Os08g0504500 | OsR498G0816418300.01.T02 | Thylakoid luminal protein, chloroplastic            |
| augustus_masked-8-processed-gene-262.27-mRNA-1 | Japonica | Japonica | Kinase-TM     | Os08g0504800 | OsR498G0917718500.01.T01 | Serine/threonine-protein kinase UCNL                |
| augustus_masked-8-processed-gene-262.29-mRNA-1 | Japonica | Indica   |               | Os08g0505001 | OsR498G0816421500.01.T02 | Complex I subunit                                   |
| augustus_masked-8-processed-gene-263.16-mRNA-1 | Japonica | Japonica | LRR-TM        | Os08g0506100 | OsR498G0816425900.01.T01 | RNase H domain-containing protein (Fragment)        |
| augustus_masked-8-processed-gene-264.15-mRNA-1 | Japonica | NA       |               | Os08g0507400 | OsR498G0816432100.01.T01 | Oryzaalexin E synthase                              |
| augustus_masked-8-processed-gene-264.16-mRNA-1 | Japonica | Japonica |               | Os08g0508000 | OsR498G0816434700.01.T01 |                                                     |
| augustus_masked-8-processed-gene-265.12-mRNA-1 | Japonica | NA       |               | Os08g0508700 | OsR498G0816439300.01.T02 | Ethylene signal transcription factor                |
| augustus_masked-8-processed-gene-266.11-mRNA-1 | Japonica | Japonica |               | Os08g0511000 | OsR498G0816446900.01.T01 | Pentatricopeptide repeat-containing protein         |
| augustus_masked-8-processed-gene-266.12-mRNA-1 | Japonica | Indica   |               | Os08g0511500 | OsR498G0816449300.01.T03 | TFIIIS N-terminal domain-containing protein         |
| augustus_masked-8-processed-gene-267.63-mRNA-1 | Japonica | NA       |               | Os08g0513400 |                          | Calvin cycle protein CP12-3 chloroplastic           |
| augustus_masked-8-processed-gene-269.21-mRNA-1 | Japonica | NA       |               | Os08g0517100 | OsR498G0816465900.01.T01 | LOB domain-containing protein 23                    |
| augustus_masked-8-processed-gene-270.44-mRNA-1 | Japonica | NA       |               | Os08g0518100 |                          | Rab-GAP TBC domain-containing protein               |
| augustus_masked-8-processed-gene-270.46-mRNA-1 | Japonica | NA       | Kinase-LRR-TM | Os08g0518400 |                          | Serine/threonine-protein kinase                     |
| augustus_masked-8-processed-gene-270.47-mRNA-1 | Japonica | NA       |               | Os08g0518900 | OsR498G0816472500.01.T01 | Xylanase inhibitor protein 1                        |
| augustus_masked-8-processed-gene-271.11-mRNA-1 | Japonica | Japonica |               | Os08g0519800 | OsR498G0816477900.01.T01 | Pumilio homolog 5                                   |
| augustus_masked-8-processed-gene-271.12-mRNA-1 | Japonica | NA       |               | Os08g0520100 |                          | RNA pseudourine synthase 3, mitochondrial           |
| augustus_masked-8-processed-gene-272.52-mRNA-1 | Japonica | NA       |               |              | OsR498G0816484100.01.T01 |                                                     |
| augustus_masked-8-processed-gene-273.10-mRNA-1 | Japonica | NA       |               |              | OsR498G0816485800.01.T01 | Zinc finger POZ domain protein-like                 |
| augustus_masked-8-processed-gene-274.24-mRNA-1 | Japonica | NA       |               | Os08g0524400 | OsR498G0816491700.01.T01 | DOMON domain-containing protein (Fragment)          |
| augustus_masked-8-processed-gene-278.41-mRNA-1 | Japonica | NA       |               |              | OsR498G0816520700.01.T05 | Plant-specific TFIIB-related protein PTF2           |
| augustus_masked-8-processed-gene-282.14-mRNA-1 | Japonica | Japonica |               | Os08g0537001 | OsR498G0816537900.01.T03 |                                                     |
| augustus_masked-8-processed-gene-282.24-mRNA-1 | Japonica | NA       |               |              | OsR498G0816539700.01.T01 |                                                     |
| augustus_masked-8-processed-gene-283.51-mRNA-1 | Japonica | Indica   |               | Os08g0538100 | OsR498G0816542100.01.T01 | Glycine--tRNA ligase, mitochondrial 1 (Fragment)    |
| augustus_masked-8-processed-gene-285.24-mRNA-1 | Japonica | NA       |               | Os08g0541700 |                          | PMEI domain-containing protein                      |
| augustus_masked-8-processed-gene-285.26-mRNA-1 | Japonica | NA       |               | Os08g0542600 | OsR498G0816556100.01.T02 | p-Nitrophenyl phosphatase                           |
| augustus_masked-8-processed-gene-286.27-mRNA-1 | Japonica | Japonica |               | Os08g0543200 | OsR498G0816559700.01.T02 | Anthranilate N-benzoyltransferase protein 3         |
| augustus_masked-8-processed-gene-289.12-mRNA-1 | Japonica | NA       |               | Os08g0548500 | OsR498G0816579100.01.T01 | Armadillo repeat only 1                             |
| augustus_masked-8-processed-gene-289.16-mRNA-1 | Japonica | NA       |               | Os08g0548900 | OsR498G0816580100.01.T01 | Proteasome endopeptidase complex                    |
| augustus_masked-8-processed-gene-290.32-mRNA-1 | Japonica | NA       |               | Os08g0549900 | OsR498G0816583500.01.T01 |                                                     |
| augustus_masked-8-processed-gene-290.33-mRNA-1 | Japonica | NA       |               | Os08g0550000 |                          | OBG-type G domain-containing protein                |
| augustus_masked-8-processed-gene-290.48-mRNA-1 | Japonica | NA       |               | Os08g0550900 |                          |                                                     |
| augustus_masked-8-processed-gene-290.51-mRNA-1 | Japonica | Japonica |               | Os08g0551300 | OsR498G0816589700.01.T01 |                                                     |
| augustus_masked-8-processed-gene-290.53-mRNA-1 | Japonica | Japonica |               | Os08g0551500 | OsR498G0816590300.01.T01 |                                                     |
| augustus_masked-8-processed-gene-290.57-mRNA-1 | Japonica | Japonica |               | Os08g0552300 | OsR498G0816589300.01.T01 |                                                     |
| augustus_masked-8-processed-gene-291.32-mRNA-1 | Japonica | NA       |               | Os08g0553000 | OsR498G0816589300.01.T01 |                                                     |
| augustus_masked-8-processed-gene-291.33-mRNA-1 | Japonica | NA       |               | Os08g0553000 | OsR498G0816589300.01.T01 |                                                     |
| augustus_masked-8-processed-gene-291.36-mRNA-1 | Japonica | Japonica |               | Os08g0553050 | OsR498G0816588900.01.T01 |                                                     |
| augustus_masked-8-processed-gene-291.37-mRNA-1 | Japonica | Indica   |               | Os08g0553200 | OsR498G0816589300.01.T01 |                                                     |
| augustus_masked-8-processed-gene-291.39-mRNA-1 | Japonica | Japonica |               | Os08g0553400 | OsR498G0816590300.01.T01 |                                                     |
| augustus_masked-8-processed-gene-291.55-mRNA-1 | Japonica | Japonica |               | Os08g0553600 | OsR498G0816589700.01.T01 |                                                     |
| augustus_masked-8-processed-gene-291.57-mRNA-1 | Japonica | Indica   |               | Os08g0552300 | OsR498G0816590300.01.T01 |                                                     |
| augustus_masked-8-processed-gene-291.62-mRNA-1 | Japonica | Japonica |               | Os08g0554300 | OsR498G0816591500.01.T01 | Rhamnogalacturonan endolyase                        |
| augustus_masked-8-processed-gene-292.19-mRNA-1 | Japonica | NA       |               | Os08g0556400 | OsR498G0816598100.01.T01 | S-acyltransferase                                   |
| augustus_masked-8-processed-gene-292.20-mRNA-1 | Japonica | NA       |               |              | OsR498G0816598300.01.T01 | Peroxin-1                                           |
| augustus_masked-8-processed-gene-293.69-mRNA-1 | Japonica | NA       |               | Os08g0558300 | OsR498G0816603700.01.T01 | WHY domain-containing protein (Fragment)            |
| augustus_masked-8-processed-gene-295.10-mRNA-1 | Japonica | NA       |               | Os08g0561700 | OsR498G0816616100.01.T01 | Superoxide dismutase                                |

|                                                |          |          |               |              |                          |                                                                            |
|------------------------------------------------|----------|----------|---------------|--------------|--------------------------|----------------------------------------------------------------------------|
| augustus_masked-8-processed-gene-295.11-mRNA-1 | Japonica | NA       |               | Os08g0561800 | OsR498G0408675500.01.T01 | Retrotransposon protein, putative, Ty3-gypsy sub-class                     |
| augustus_masked-8-processed-gene-296.10-mRNA-1 | Japonica | Indica   |               | Os05g0437133 | OsR498G0816621300.01.T01 | Ethylene-responsive transcription factor ERF098                            |
| augustus_masked-8-processed-gene-296.23-mRNA-1 | Japonica | NA       |               | Os08g0564000 | OsR498G0816622500.01.T01 | H(+)/Pi cotransporter                                                      |
| augustus_masked-8-processed-gene-296.25-mRNA-1 | Japonica | Indica   |               | Os08g0564300 | OsR498G0816623900.01.T03 | p-glycoprotein 1                                                           |
| augustus_masked-8-processed-gene-296.28-mRNA-1 | Japonica | Indica   |               | Os08g0564750 | OsR498G0816627100.01.T01 | Small acidic protein 2                                                     |
| augustus_masked-8-processed-gene-39.34-mRNA-1  | Japonica | NA       |               | Os08g0162200 | OsR498G0815251700.01.T02 | Pentatricopeptide repeat                                                   |
| augustus_masked-8-processed-gene-39.39-mRNA-1  | Japonica | NA       |               | Os08g0162700 | OsR498G0815253700.01.T01 | PCI domain-containing protein                                              |
| augustus_masked-8-processed-gene-4.18-mRNA-1   | Japonica | Japonica | CC-NBS-TM     | Os08g0107000 | OsR498G0815041300.01.T01 | Disease resistance protein RPP13                                           |
| augustus_masked-8-processed-gene-40.0-mRNA-1   | Japonica | NA       |               | Os08g0164300 | OsR498G0815258700.01.T01 | DUF569 domain-containing protein                                           |
| augustus_masked-8-processed-gene-40.19-mRNA-1  | Japonica | Japonica |               | Os08g0165200 | OsR498G0815259700.01.T01 | Protein kinase domain-containing protein                                   |
| augustus_masked-8-processed-gene-42.11-mRNA-1  | Japonica | NA       |               | Os08g0168932 |                          |                                                                            |
| augustus_masked-8-processed-gene-44.35-mRNA-1  | Japonica | NA       |               | Os08g0173300 | OsR498G0815295300.01.T01 |                                                                            |
| augustus_masked-8-processed-gene-47.11-mRNA-1  | Japonica | NA       |               | Os08g0178300 | OsR498G0815308500.01.T02 | Pre-mRNA-splicing factor of RES complex protein                            |
| augustus_masked-8-processed-gene-47.12-mRNA-1  | Japonica | Indica   |               | Os08g0178500 | OsR498G0815309100.01.T01 | Wound induced protein                                                      |
| augustus_masked-8-processed-gene-47.6-mRNA-1   | Japonica | NA       |               |              | OsR498G0815306300.01.T01 |                                                                            |
| augustus_masked-8-processed-gene-5.49-mRNA-1   | Japonica | NA       | Kinase-TM     | Os08g0109800 | OsR498G0815051500.01.T01 | Serine/threonine-protein kinase-like protein CCR4                          |
| augustus_masked-8-processed-gene-53.22-mRNA-1  | Japonica | NA       |               | Os08g0191000 | OsR498G0815344900.01.T01 | Auxin efflux carrier                                                       |
| augustus_masked-8-processed-gene-56.11-mRNA-1  | Japonica | Indica   |               | Os11g0638801 | OsR498G0815358900.01.T01 | DUF4220 domain-containing protein (Fragment)                               |
| augustus_masked-8-processed-gene-57.39-mRNA-1  | Japonica | NA       |               |              |                          | Zinc finger BED domain-containing protein DAYSLEEPER                       |
| augustus_masked-8-processed-gene-6.12-mRNA-1   | Japonica | NA       |               |              | OsR498G0203043500.01.T01 |                                                                            |
| augustus_masked-8-processed-gene-62.18-mRNA-1  | Japonica | NA       |               |              | OsR498G0815389900.01.T01 |                                                                            |
| augustus_masked-8-processed-gene-63.34-mRNA-1  | Japonica | Indica   |               | Os08g0205300 | OsR498G0815393500.01.T02 | Histone-lysine N-methyltransferase ASHR2                                   |
| augustus_masked-8-processed-gene-64.2-mRNA-1   | Japonica | NA       |               | Os08g0207300 |                          |                                                                            |
| augustus_masked-8-processed-gene-66.11-mRNA-1  | Japonica | NA       |               | Os05g0267732 | OsR498G0510213400.01.T01 |                                                                            |
| augustus_masked-8-processed-gene-75.29-mRNA-1  | Japonica | NA       |               |              |                          |                                                                            |
| augustus_masked-8-processed-gene-75.7-mRNA-1   | Japonica | Japonica |               | Os08g0221000 | OsR498G0815443700.01.T01 |                                                                            |
| augustus_masked-8-processed-gene-76.10-mRNA-1  | Japonica | NA       |               | Os08g0219100 | OsR498G0815449300.01.T01 | PMEI domain-containing protein                                             |
| augustus_masked-8-processed-gene-77.2-mRNA-1   | Japonica | NA       |               | Os08g0218700 | OsR498G0815450300.01.T01 | PMEI domain-containing protein                                             |
| augustus_masked-8-processed-gene-80.9-mRNA-1   | Japonica | NA       |               |              | OsR498G0815473300.01.T01 | BTB/POZ and MATH domain-containing protein 2                               |
| augustus_masked-8-processed-gene-81.26-mRNA-1  | Japonica | Japonica |               | Os08g0227400 | OsR498G0815478400.01.T01 | BTB/POZ and MATH domain-containing protein 1                               |
| augustus_masked-8-processed-gene-83.0-mRNA-1   | Japonica | NA       |               | Os08g0230200 | OsR498G0815484900.01.T02 | Ubiquitin-specific protease family C19-related protein                     |
| augustus_masked-8-processed-gene-83.1-mRNA-1   | Japonica | NA       |               |              | OsR498G0815485700.01.T01 |                                                                            |
| augustus_masked-8-processed-gene-87.33-mRNA-1  | Japonica | Japonica |               | Os08g0238100 | OsR498G1119809300.01.T02 | Pentatricopeptide repeat-containing protein (Fragment)                     |
| augustus_masked-8-processed-gene-88.1-mRNA-1   | Japonica | Japonica |               | Os08g0239300 | OsR498G0815510700.01.T03 | DLH domain-containing protein                                              |
| augustus_masked-8-processed-gene-88.13-mRNA-1  | Japonica | Indica   |               | Os08g0240533 | OsR498G0815512300.01.T01 | Xyloglucan endotransglucosylase/hydrolase                                  |
| augustus_masked-8-processed-gene-90.38-mRNA-1  | Japonica | NA       |               |              | OsR498G0815522700.01.T01 | rRNA N-glycosidase                                                         |
| augustus_masked-8-processed-gene-93.26-mRNA-1  | Japonica | NA       | LRR-NBS-TM    | Os08g0246300 | OsR498G0815530100.01.T01 | Disease resistance protein RPM1                                            |
| augustus_masked-8-processed-gene-94.1-mRNA-1   | Japonica | Indica   |               | Os10g0495200 | OsR498G0815537100.01.T01 | Rf1 protein, mitochondrial, putative, expressed                            |
| augustus_masked-8-processed-gene-97.14-mRNA-1  | Japonica | NA       |               | Os08g0256700 |                          | Protein kinase domain-containing protein                                   |
| augustus_masked-8-processed-gene-97.16-mRNA-1  | Japonica | NA       |               |              |                          |                                                                            |
| augustus_masked-9-processed-gene-106.11-mRNA-1 | Japonica | Indica   |               | Os04g0461800 | OsR498G0917216400.01.T01 | Formin-like protein 2                                                      |
| augustus_masked-9-processed-gene-11.0-mRNA-1   | Japonica | NA       |               |              | OsR498G0916682700.01.T01 | VIER F-box protein 1                                                       |
| augustus_masked-9-processed-gene-110.25-mRNA-1 | Japonica | NA       |               |              | OsR498G1119549200.01.T02 |                                                                            |
| augustus_masked-9-processed-gene-110.29-mRNA-1 | Japonica | NA       |               | Os09g0342000 | OsR498G0917198400.01.T01 | CRIB domain-containing protein                                             |
| augustus_masked-9-processed-gene-110.30-mRNA-1 | Japonica | NA       |               | Os09g0341600 | OsR498G0917198200.01.T01 | F-box domain-containing protein (Fragment)                                 |
| augustus_masked-9-processed-gene-111.0-mRNA-1  | Japonica | Indica   |               | Os09g0341500 | OsR498G0917198000.01.T01 | F-box domain-containing protein (Fragment)                                 |
| augustus_masked-9-processed-gene-114.24-mRNA-1 | Japonica | Japonica |               | Os09g0336500 | OsR498G1220975100.01.T01 | Zinc knuckle family protein                                                |
| augustus_masked-9-processed-gene-118.25-mRNA-1 | Japonica | Indica   | Kinase-LRR-TM | Os09g0352000 | OsR498G0917242100.01.T03 | Putative leucine-rich repeat receptor-like serine/threonine-protein kinase |
| augustus_masked-9-processed-gene-119.44-mRNA-1 | Japonica | NA       |               | Os09g0362500 | OsR498G0917249500.01.T02 | Aminopeptidase                                                             |
| augustus_masked-9-processed-gene-120.13-mRNA-1 | Japonica | NA       |               | Os09g0364000 | OsR498G0917253500.01.T01 | Zinc finger CCCH domain-containing protein 59                              |
| augustus_masked-9-processed-gene-121.10-mRNA-1 | Japonica | Indica   |               | Os09g0364800 | OsR498G0917256500.01.T01 | HMA domain-containing protein (Fragment)                                   |
| augustus_masked-9-processed-gene-121.19-mRNA-1 | Japonica | Japonica | LRR-NBS-TM    | Os09g0365300 | OsR498G0917259200.01.T01 | Protein kinase domain-containing protein                                   |
| augustus_masked-9-processed-gene-123.14-mRNA-1 | Japonica | NA       |               | Os09g0369000 | OsR498G0917276700.01.T01 | AP domain DRE binding factor                                               |
| augustus_masked-9-processed-gene-124.0-mRNA-1  | Japonica | Japonica |               | Os09g0369400 | OsR498G0917279900.01.T04 | Trehalose 6-phosphate phosphatase                                          |
| augustus_masked-9-processed-gene-124.6-mRNA-1  | Japonica | NA       |               | Os09g0370000 |                          |                                                                            |
| augustus_masked-9-processed-gene-125.36-mRNA-1 | Japonica | NA       |               |              | OsR498G0917285500.01.T01 | MFS transporter                                                            |
| augustus_masked-9-processed-gene-126.1-mRNA-1  | Japonica | NA       |               | Os09g0373200 | OsR498G0917293100.01.T01 | Strictosidine synthase 3                                                   |
| augustus_masked-9-processed-gene-127.1-mRNA-1  | Japonica | NA       |               | Os03g0154300 | OsR498G1119747800.01.T01 | RNA-directed RNA polymerase                                                |
| augustus_masked-9-processed-gene-129.0-mRNA-1  | Japonica | NA       |               | Os09g0378700 | OsR498G0917310300.01.T01 | RING-type E3 ubiquitin transferase                                         |
| augustus_masked-9-processed-gene-129.20-mRNA-1 | Japonica | NA       |               |              | OsR498G0917313700.01.T05 | Acyl-activating enzyme 17                                                  |
| augustus_masked-9-processed-gene-130.19-mRNA-1 | Japonica | NA       |               | Os09g0380300 |                          | GRAS domain-containing protein (Fragment)                                  |

|                                                |          |          |           |              |                          |                                                         |
|------------------------------------------------|----------|----------|-----------|--------------|--------------------------|---------------------------------------------------------|
| augustus_masked-9-processed-gene-136.0-mRNA-1  | Japonica | NA       |           |              |                          |                                                         |
| augustus_masked-9-processed-gene-142.26-mRNA-1 | Japonica | NA       |           |              |                          | HAT dimerisation domain-containing protein, putative    |
| augustus_masked-9-processed-gene-146.33-mRNA-1 | Japonica | Indica   |           | Os09g0410500 | OsR498G0917433500.01.T02 | Retarded palea 1 protein (Fragment)                     |
| augustus_masked-9-processed-gene-147.54-mRNA-1 | Japonica | NA       |           | Os09g0412900 | OsR498G0917439900.01.T01 | Pentatricopeptide repeat                                |
| augustus_masked-9-processed-gene-150.22-mRNA-1 | Japonica | Indica   |           | Os09g0416600 | OsR498G0917456300.01.T01 |                                                         |
| augustus_masked-9-processed-gene-150.23-mRNA-1 | Japonica | Japonica |           | Os09g0416800 | OsR498G0917457300.01.T01 | Poly(A)-specific ribonuclease                           |
| augustus_masked-9-processed-gene-150.28-mRNA-1 | Japonica | NA       |           | Os09g0417500 | OsR498G0917462100.01.T01 | Pentatricopeptide repeat-containing protein             |
| augustus_masked-9-processed-gene-155.16-mRNA-1 | Japonica | NA       |           |              | OsR498G0917487700.01.T01 | Glycylpeptide N-tetradecanoyltransferase                |
| augustus_masked-9-processed-gene-155.4-mRNA-1  | Japonica | NA       |           | Os09g0425300 |                          | Voltage-dependent T-type calcium channel subunit alpha  |
| augustus_masked-9-processed-gene-157.20-mRNA-1 | Japonica | NA       |           |              | OsR498G0917503500.01.T01 | Zinc finger protein 2                                   |
| augustus_masked-9-processed-gene-160.21-mRNA-1 | Japonica | NA       |           | Os09g0433600 | OsR498G0917518300.01.T01 | Multifunctional fusion protein                          |
| augustus_masked-9-processed-gene-160.38-mRNA-1 | Japonica | NA       |           | Os09g0434500 | OsR498G0917520500.01.T01 | EREBP transcription factor                              |
| augustus_masked-9-processed-gene-160.39-mRNA-1 | Japonica | NA       |           |              | OsR498G0917522700.01.T01 | RNA helicase                                            |
| augustus_masked-9-processed-gene-161.0-mRNA-1  | Japonica | NA       |           |              | OsR498G0917524700.01.T01 | Putative cell death associated protein                  |
| augustus_masked-9-processed-gene-161.11-mRNA-1 | Japonica | NA       |           |              |                          |                                                         |
| augustus_masked-9-processed-gene-163.13-mRNA-1 | Japonica | NA       |           | Os09g0439600 | OsR498G0917538300.01.T01 | Exocyst subunit Exo70 family protein (Fragment)         |
| augustus_masked-9-processed-gene-165.9-mRNA-1  | Japonica | NA       |           | Os09g0442400 | OsR498G0917550500.01.T02 | Protein GAMETE EXPRESSED 1                              |
| augustus_masked-9-processed-gene-166.15-mRNA-1 | Japonica | NA       |           |              | OsR498G0917553100.01.T01 | PAB5 domain-containing protein                          |
| augustus_masked-9-processed-gene-167.14-mRNA-1 | Japonica | Indica   |           | Os09g0445500 | OsR498G0917561300.01.T01 | Zinc finger protein GIS                                 |
| augustus_masked-9-processed-gene-167.17-mRNA-1 | Japonica | Japonica |           | Os09g0445700 | OsR498G0917563300.01.T01 | Adenosinetriphosphatase                                 |
| augustus_masked-9-processed-gene-170.23-mRNA-1 | Japonica | NA       |           | Os09g0451500 | OsR498G0917589100.01.T01 | Protein disulfide-isomerase                             |
| augustus_masked-9-processed-gene-170.35-mRNA-1 | Japonica | NA       |           | Os09g0452400 | OsR498G0917591700.01.T01 | Aspartic proteinase nepenthesin                         |
| augustus_masked-9-processed-gene-170.37-mRNA-1 | Japonica | NA       |           |              | OsR498G0714603300.01.T01 |                                                         |
| augustus_masked-9-processed-gene-172.10-mRNA-1 | Japonica | NA       |           |              | OsR498G1119312200.01.T01 |                                                         |
| augustus_masked-9-processed-gene-172.11-mRNA-1 | Japonica | NA       |           | Os09g0455300 | OsR498G0917602900.01.T02 | Transcription factor HEC1                               |
| augustus_masked-9-processed-gene-173.0-mRNA-1  | Japonica | NA       |           | Os09g0456800 | OsR498G0917608700.01.T01 | Heat shock transcription factor                         |
| augustus_masked-9-processed-gene-174.20-mRNA-1 | Japonica | Japonica |           | Os09g0458800 | OsR498G0917615900.01.T02 | Polcalcin Phl p 7-like                                  |
| augustus_masked-9-processed-gene-174.25-mRNA-1 | Japonica | NA       |           | Os09g0460000 | OsR498G0917620100.01.T03 | Diphthamide biosynthesis protein 4                      |
| augustus_masked-9-processed-gene-174.6-mRNA-1  | Japonica | NA       |           | Os09g0458700 |                          | Calmodulin-like protein 1                               |
| augustus_masked-9-processed-gene-175.15-mRNA-1 | Japonica | Japonica |           | Os09g0461700 | OsR498G0917605400.01.T01 | Tuliposide A-converting enzyme 2, chloroplastic         |
| augustus_masked-9-processed-gene-175.17-mRNA-1 | Japonica | NA       |           | Os09g0462100 | OsR498G0917625500.01.T01 | Tuliposide A-converting enzyme 1, chloroplastic         |
| augustus_masked-9-processed-gene-175.18-mRNA-1 | Japonica | Japonica |           | Os09g0462300 | OsR498G0816299500.01.T01 | Tuliposide A-converting enzyme 2, chloroplastic         |
| augustus_masked-9-processed-gene-175.2-mRNA-1  | Japonica | NA       |           | Os09g0460300 | OsR498G0917621300.01.T01 | Tuliposide A-converting enzyme b1, amyloplastic         |
| augustus_masked-9-processed-gene-175.3-mRNA-1  | Japonica | Japonica |           | Os09g0460400 | OsR498G0917621300.01.T01 | Tuliposide A-converting enzyme b1, amyloplastic         |
| augustus_masked-9-processed-gene-175.5-mRNA-1  | Japonica | NA       |           | Os09g0460700 | OsR498G0917622300.01.T01 | Tuliposide A-converting enzyme 1, chloroplastic         |
| augustus_masked-9-processed-gene-175.6-mRNA-1  | Japonica | NA       |           | Os09g0460800 | OsR498G0917622500.01.T01 | Tuliposide A-converting enzyme b1, amyloplastic         |
| augustus_masked-9-processed-gene-176.18-mRNA-1 | Japonica | NA       |           | Os09g0463600 | OsR498G0917633900.01.T01 | Plant-specific domain TIGR01570 family protein          |
| augustus_masked-9-processed-gene-176.19-mRNA-1 | Japonica | NA       |           | Os09g0463700 | OsR498G0917634300.01.T02 | J domain-containing protein (Fragment)                  |
| augustus_masked-9-processed-gene-176.21-mRNA-1 | Japonica | NA       |           |              | OsR498G0917635900.01.T01 |                                                         |
| augustus_masked-9-processed-gene-179.1-mRNA-1  | Japonica | NA       |           |              | OsR498G0917653300.01.T01 |                                                         |
| augustus_masked-9-processed-gene-181.10-mRNA-1 | Japonica | NA       |           | Os09g0473400 | OsR498G0917668500.01.T01 | PORR domain-containing protein (Fragment)               |
| augustus_masked-9-processed-gene-181.6-mRNA-1  | Japonica | NA       |           | Os09g0472700 | OsR498G0917666300.01.T01 | Blight-associated protein p12                           |
| augustus_masked-9-processed-gene-181.7-mRNA-1  | Japonica | NA       |           | Os09g0472900 | OsR498G0917667700.01.T01 | Expansin-like EG45 domain-containing protein (Fragment) |
| augustus_masked-9-processed-gene-182.22-mRNA-1 | Japonica | Indica   |           | Os09g0473600 | OsR498G0917669300.01.T01 | probable serine/threonine-protein kinase fhkB           |
| augustus_masked-9-processed-gene-182.37-mRNA-1 | Japonica | NA       |           |              | OsR498G0917673500.01.T01 |                                                         |
| augustus_masked-9-processed-gene-183.24-mRNA-1 | Japonica | NA       |           | Os09g0475800 | OsR498G0917678300.01.T01 | DNA-binding with one finger protein 22                  |
| augustus_masked-9-processed-gene-184.10-mRNA-1 | Japonica | Indica   |           | Os09g0517800 | OsR498G0917689100.01.T06 | F-box domain-containing protein                         |
| augustus_masked-9-processed-gene-185.10-mRNA-1 | Japonica | Japonica |           | Os09g0480200 | OsR498G0917693300.01.T01 | Putative chalcone synthase                              |
| augustus_masked-9-processed-gene-185.15-mRNA-1 | Japonica | NA       |           |              | OsR498G0917695700.01.T01 | BURP domain-containing protein 15                       |
| augustus_masked-9-processed-gene-186.43-mRNA-1 | Japonica | Indica   |           | Os09g0481600 | OsR498G0917698300.01.T01 | AAA domain-containing protein (Fragment)                |
| augustus_masked-9-processed-gene-186.44-mRNA-1 | Japonica | NA       |           |              |                          | Polyubiquitin 9                                         |
| augustus_masked-9-processed-gene-186.58-mRNA-1 | Japonica | NA       |           | Os09g0482700 |                          | Heat shock protein 81-3                                 |
| augustus_masked-9-processed-gene-187.20-mRNA-1 | Japonica | NA       |           | Os09g0483300 | OsR498G0917709300.01.T01 | Calcium-binding EF hand family protein                  |
| augustus_masked-9-processed-gene-188.10-mRNA-1 | Japonica | NA       | Kinase-TM | Os09g0486700 | OsR498G0917718500.01.T01 | Serine/threonine-protein kinase UCNL                    |
| augustus_masked-9-processed-gene-188.5-mRNA-1  | Japonica | NA       |           | Os06g0612300 |                          | Zinc finger protein WIP2                                |
| augustus_masked-9-processed-gene-190.13-mRNA-1 | Japonica | NA       |           | Os09g0491756 | OsR498G0917732900.01.T04 | Splicing factor U2af small subunit A                    |
| augustus_masked-9-processed-gene-193.57-mRNA-1 | Japonica | Indica   |           | Os09g0498100 | OsR498G0917746500.01.T10 | 30S ribosomal protein S16-2 chloroplastic/mitochondrial |
| augustus_masked-9-processed-gene-194.40-mRNA-1 | Japonica | Indica   |           | Os02g0179600 | OsR498G0917753100.01.T01 |                                                         |
| augustus_masked-9-processed-gene-195.0-mRNA-1  | Japonica | Indica   |           | Os08g0524400 | OsR498G0917755900.01.T01 | DOMON domain-containing protein (Fragment)              |
| augustus_masked-9-processed-gene-195.16-mRNA-1 | Japonica | NA       |           |              | OsR498G0917761100.01.T01 | Chloroplastic quinone-oxidoreductase                    |
| augustus_masked-9-processed-gene-195.19-mRNA-1 | Japonica | NA       |           | Os09g0503400 | OsR498G0917762300.01.T01 | Leucyl-tRNA synthetase                                  |

|                                                |          |          |                 |              |                          |                                                            |
|------------------------------------------------|----------|----------|-----------------|--------------|--------------------------|------------------------------------------------------------|
| augustus_masked-9-processed-gene-197.76-mRNA-1 | Japonica | NA       |                 | Os09g0507100 | OsR498G0917772100.01.T04 | SBP-box family member protein (Fragment)                   |
| augustus_masked-9-processed-gene-199.17-mRNA-1 | Japonica | NA       |                 |              | OsR498G0917786700.01.T01 |                                                            |
| augustus_masked-9-processed-gene-199.18-mRNA-1 | Japonica | NA       |                 |              | OsR498G0917787300.01.T01 |                                                            |
| augustus_masked-9-processed-gene-20.15-mRNA-1  | Japonica | NA       |                 |              |                          | Ankyrin repeat protein-like                                |
| augustus_masked-9-processed-gene-203.27-mRNA-1 | Japonica | Indica   |                 | Os09g0517800 | OsR498G0917804100.01.T01 | F-box domain-containing protein                            |
| augustus_masked-9-processed-gene-203.37-mRNA-1 | Japonica | Japonica |                 | Os09g0518000 | OsR498G0917804500.01.T01 | Glycosyltransferase                                        |
| augustus_masked-9-processed-gene-205.19-mRNA-1 | Japonica | NA       |                 | Os09g0522800 | OsR498G0917819100.01.T01 |                                                            |
| augustus_masked-9-processed-gene-208.35-mRNA-1 | Japonica | NA       |                 |              | OsR498G0917840100.01.T02 | SH3 and multiple ankyrin repeat domains protein 1          |
| augustus_masked-9-processed-gene-209.0-mRNA-1  | Japonica | NA       |                 | Os09g0529900 | OsR498G0917840500.01.T01 | Rhodanese-like domain-containing protein 14, chloroplastic |
| augustus_masked-9-processed-gene-21.2-mRNA-1   | Japonica | NA       |                 | Os02g0212975 | OsR498G0305421900.01.T01 | Kinesin-like protein KIN-14G                               |
| augustus_masked-9-processed-gene-211.43-mRNA-1 | Japonica | Indica   |                 | Os11g0138300 | OsR498G0917856700.01.T01 | Cytochrome P450 family protein, expressed                  |
| augustus_masked-9-processed-gene-212.1-mRNA-1  | Japonica | NA       |                 | Os09g0535400 | OsR498G0917860300.01.T01 | Collagen, type IV, alpha 5                                 |
| augustus_masked-9-processed-gene-212.2-mRNA-1  | Japonica | Indica   |                 | Os07g0593400 | OsR498G0917860900.01.T02 | WPP domain-containing protein                              |
| augustus_masked-9-processed-gene-212.5-mRNA-1  | Japonica | NA       |                 | Os09g0536200 | OsR498G0917863900.01.T01 | Armadillo repeat only 1                                    |
| augustus_masked-9-processed-gene-213.15-mRNA-1 | Japonica | NA       |                 | Os09g0538750 | OsR498G0917877500.01.T01 | DUF632 domain-containing protein (Fragment)                |
| augustus_masked-9-processed-gene-213.19-mRNA-1 | Japonica | NA       |                 |              | OsR498G0203810500.01.T01 |                                                            |
| augustus_masked-9-processed-gene-214.48-mRNA-1 | Japonica | NA       |                 |              | OsR498G0917884900.01.T01 |                                                            |
| augustus_masked-9-processed-gene-215.28-mRNA-1 | Japonica | NA       |                 |              | OsR498G0917893100.01.T01 |                                                            |
| augustus_masked-9-processed-gene-215.29-mRNA-1 | Japonica | NA       |                 | Os09g0543900 | OsR498G0917894100.01.T01 | Putrescine hydroxycinnamoyltransferase                     |
| augustus_masked-9-processed-gene-218.34-mRNA-1 | Japonica | NA       |                 |              | OsR498G0917910900.01.T01 | F-box domain-containing protein                            |
| augustus_masked-9-processed-gene-218.56-mRNA-1 | Japonica | NA       |                 |              | OsR498G0917916500.01.T03 | BED-type domain-containing protein                         |
| augustus_masked-9-processed-gene-22.21-mRNA-1  | Japonica | Japonica |                 | Os09g0126600 | OsR498G0916735500.01.T01 | Tyrosine specific protein phosphatase-like                 |
| augustus_masked-9-processed-gene-220.58-mRNA-1 | Japonica | Indica   |                 | Os09g0553800 | OsR498G0917928900.01.T01 | Ecotropic viral integration site protein                   |
| augustus_masked-9-processed-gene-220.59-mRNA-1 | Japonica | NA       |                 | Os09g0553900 |                          | Plastid movement impaired protein                          |
| augustus_masked-9-processed-gene-221.53-mRNA-1 | Japonica | NA       |                 | Os09g0555150 | OsR498G0917933500.01.T01 | Sulfotransferase                                           |
| augustus_masked-9-processed-gene-221.55-mRNA-1 | Japonica | NA       |                 | Os09g0555300 | OsR498G0917934300.01.T01 | F-box/kelch-repeat protein At5g42360                       |
| augustus_masked-9-processed-gene-221.56-mRNA-1 | Japonica | NA       |                 |              | OsR498G0917934700.01.T01 |                                                            |
| augustus_masked-9-processed-gene-223.14-mRNA-1 | Japonica | NA       |                 | Os09g0558200 | OsR498G0917943500.01.T01 | Transcription factor                                       |
| augustus_masked-9-processed-gene-223.18-mRNA-1 | Japonica | Indica   |                 | Os09g0559600 | OsR498G0917946500.01.T02 | Thioredoxin domain-containing protein                      |
| augustus_masked-9-processed-gene-225.0-mRNA-1  | Japonica | NA       | Kinase-TM WAK92 | Os09g0562600 | OsR498G0917953300.01.T02 | Wall-associated receptor kinase 3                          |
| augustus_masked-9-processed-gene-225.13-mRNA-1 | Japonica | NA       |                 | Os05g0116600 | OsR498G0509609000.01.T01 | F-box protein interaction domain containing protein        |
| augustus_masked-9-processed-gene-227.15-mRNA-1 | Japonica | Japonica |                 | Os09g0565700 | OsR498G0917961300.01.T03 | Arogenate dehydratase                                      |
| augustus_masked-9-processed-gene-227.17-mRNA-1 | Japonica | Japonica |                 | Os09g0566000 | OsR498G0917961300.01.T03 | Arogenate dehydratase                                      |
| augustus_masked-9-processed-gene-228.76-mRNA-1 | Japonica | NA       |                 | Os09g0569100 | OsR498G0917971500.01.T01 | Genetic modifier                                           |
| augustus_masked-9-processed-gene-229.63-mRNA-1 | Japonica | Japonica |                 | Os09g0570800 | OsR498G0816609100.01.T01 | feruloyl CoA ortho-hydroxylase 2                           |
| augustus_masked-9-processed-gene-229.64-mRNA-1 | Japonica | NA       |                 | Os09g0571100 | OsR498G0917977900.01.T01 | Pectinesterase                                             |
| augustus_masked-9-processed-gene-229.68-mRNA-1 | Japonica | NA       |                 | Os09g0572000 | OsR498G0917980300.01.T01 | Ethylene-responsive transcription factor 15                |
| augustus_masked-9-processed-gene-230.0-mRNA-1  | Japonica | NA       |                 | Os09g0572200 | OsR498G0917980900.01.T03 | P-loop NTPase domain-containing protein LPA1               |
| augustus_masked-9-processed-gene-230.10-mRNA-1 | Japonica | NA       |                 | Os09g0572700 | OsR498G0917982900.01.T01 | Phytoecyanin domain-containing protein                     |
| augustus_masked-9-processed-gene-24.35-mRNA-1  | Japonica | NA       |                 |              | OsR498G0917242300.01.T01 |                                                            |
| augustus_masked-9-processed-gene-26.17-mRNA-1  | Japonica | NA       | LRR-TM          | Os09g0131200 |                          | Receptor like protein 44 isoform 2                         |
| augustus_masked-9-processed-gene-26.21-mRNA-1  | Japonica | NA       |                 | Os07g0562400 | OsR498G0714577900.01.T01 | MFS domain-containing protein (Fragment)                   |
| augustus_masked-9-processed-gene-26.5-mRNA-1   | Japonica | NA       |                 |              | OsR498G0916747900.01.T01 |                                                            |
| augustus_masked-9-processed-gene-28.17-mRNA-1  | Japonica | NA       |                 | Os09g0132200 | OsR498G0916754500.01.T01 | GDSL-motif lipase/hydrolase-like                           |
| augustus_masked-9-processed-gene-30.9-mRNA-1   | Japonica | Indica   |                 | Os09g0135400 | OsR498G0916767700.01.T01 | Receptor kinase                                            |
| augustus_masked-9-processed-gene-35.25-mRNA-1  | Japonica | NA       |                 | Os09g0241550 | OsR498G0916787100.01.T01 | F-box domain containing protein, expressed                 |
| augustus_masked-9-processed-gene-37.10-mRNA-1  | Japonica | Japonica |                 | Os09g0244600 | OsR498G1019219100.01.T02 |                                                            |
| augustus_masked-9-processed-gene-4.14-mRNA-1   | Japonica | NA       |                 | Os09g0102300 |                          | DNA-binding storekeeper protein-related                    |
| augustus_masked-9-processed-gene-45.19-mRNA-1  | Japonica | NA       |                 |              | OsR498G0916838100.01.T05 | Exosome complex component RRP41                            |
| augustus_masked-9-processed-gene-46.10-mRNA-1  | Japonica | Indica   |                 | Os09g0258700 | OsR498G0916851500.01.T01 | Bidirectional sugar transporter SWEET                      |
| augustus_masked-9-processed-gene-47.13-mRNA-1  | Japonica | NA       |                 | Os09g0255900 | OsR498G0916844700.01.T01 |                                                            |
| augustus_masked-9-processed-gene-47.9-mRNA-1   | Japonica | NA       |                 |              | OsR498G0511259700.01.T01 | Transposon protein, putative, Mutator sub-class, expressed |
| augustus_masked-9-processed-gene-48.0-mRNA-1   | Japonica | NA       |                 | Os09g0256100 | OsR498G0916845900.01.T01 | Sulfotransferase                                           |
| augustus_masked-9-processed-gene-5.28-mRNA-1   | Japonica | NA       |                 | Os09g0103700 | OsR498G0916647700.01.T01 | CAX-interacting protein 4                                  |
| augustus_masked-9-processed-gene-55.25-mRNA-1  | Japonica | Indica   | Kinase-TM       | Os07g0283125 | OsR498G0916878900.01.T01 | Lectin-domain containing receptor kinase A4.2              |
| augustus_masked-9-processed-gene-56.0-mRNA-1   | Japonica | NA       |                 |              | OsR498G0916880300.01.T01 |                                                            |
| augustus_masked-9-processed-gene-56.17-mRNA-1  | Japonica | NA       |                 |              | OsR498G0407871400.01.T01 | Retrotransposon protein, putative, Ty3-gypsy sub-class     |
| augustus_masked-9-processed-gene-62.16-mRNA-1  | Japonica | NA       |                 |              | OsR498G0916902900.01.T01 |                                                            |
| augustus_masked-9-processed-gene-63.28-mRNA-1  | Japonica | NA       |                 |              | OsR498G0916907500.01.T01 |                                                            |
| augustus_masked-9-processed-gene-77.12-mRNA-1  | Japonica | Indica   |                 | Os07g0559700 | OsR498G0917012900.01.T01 | Sugar carrier protein C                                    |
| augustus_masked-9-processed-gene-82.11-mRNA-1  | Japonica | NA       |                 | Os09g0304500 | OsR498G0917038900.01.T01 |                                                            |

|                                               |          |        |        |              |                           |                                                                          |
|-----------------------------------------------|----------|--------|--------|--------------|---------------------------|--------------------------------------------------------------------------|
| augustus_masked-9-processed-gene-92.16-mRNA-1 | Japonica | NA     |        |              | OsR498G0917242300.01.T01  |                                                                          |
| augustus_masked-9-processed-gene-95.31-mRNA-1 | Japonica | NA     |        |              |                           |                                                                          |
| augustus_masked-9-processed-gene-96.18-mRNA-1 | Japonica | NA     |        | Os09g0324300 | OsR498G0917155300.01.T01  | F-box domain-containing protein (Fragment)                               |
| augustus_masked-9-processed-gene-96.19-mRNA-1 | Japonica | NA     |        | Os09g0324400 | OsR498G0917155900.01.T01  | F-box domain-containing protein (Fragment)                               |
| augustus_masked-9-processed-gene-96.2-mRNA-1  | Japonica | NA     |        | Os09g0324200 | OsR498G0917154900.01.T01  | F-box domain-containing protein (Fragment)                               |
| augustus_masked-9-processed-gene-96.23-mRNA-1 | Japonica | NA     |        | Os09g0325700 | OsR498G0917159900.01.T01  | Protein-serine/threonine phosphatase                                     |
| augustus_masked-9-processed-gene-97.17-mRNA-1 | Japonica | NA     |        | Os09g0326800 | OsR498G0917161300.01.T01  | 26S proteasome non-ATPase regulatory subunit 2 A                         |
| augustus_masked-9-processed-gene-98.4-mRNA-1  | Japonica | NA     |        | Os09g0326900 | OsR498G0917161700.01.T06  | W2 domain-containing protein (Fragment)                                  |
| augustus_masked-9-processed-gene-99.19-mRNA-1 | Japonica | NA     |        | Os09g0329000 | OsR498G0917165300.01.T01  | BURP domain-containing protein 14                                        |
| maker-1-augustus-gene-1.12-mRNA-1             | Japonica | NA     |        | Os01g0100500 | OsR498G0100001700.01.T05  | Monocopper oxidase-like protein SKU5                                     |
| maker-1-augustus-gene-1.16-mRNA-1             | Japonica | NA     |        | Os01g0100600 | OsR498G0100002100.01.T01  | SUZ domain-containing protein (Fragment)                                 |
| maker-1-augustus-gene-1.20-mRNA-1             | Japonica | NA     |        | Os01g0100700 | OsR498G0100002300.01.T01  | 40S ribosomal protein like                                               |
| maker-1-augustus-gene-1.22-mRNA-1             | Japonica | NA     |        |              |                           | Putative 1-phosphatidylinositol-3-phosphate 5-kinase FAB1C               |
| maker-1-augustus-gene-1.29-mRNA-1             | Japonica | NA     |        | Os01g0100900 | OsR498G0100003100.01.T01  | Sphingosine-1-phosphate lyase                                            |
| maker-1-augustus-gene-1.3-mRNA-1              | Japonica | Indica |        | Os01g0100100 | OsR498G0100000700.01.T01  | Rab-GAP TBC domain-containing protein                                    |
| maker-1-augustus-gene-1.34-mRNA-1             | Japonica | NA     |        | Os01g0101200 |                           | probable bifunctional methylthioribulose-1-phosphate dehydratase/enolase |
| maker-1-augustus-gene-1.47-mRNA-1             | Japonica | NA     |        | Os01g0101300 | OsR498G0100004600.01.T01  | Snurportin-1                                                             |
| maker-1-augustus-gene-1.8-mRNA-1              | Japonica | Indica |        | Os01g0100400 | OsR498G0100001500.01.T01  | Monocopper oxidase-like protein SKU5                                     |
| maker-1-augustus-gene-10.45-mRNA-1            | Japonica | NA     |        | Os01g0119500 | OsR498G0100063300.01.T02  |                                                                          |
| maker-1-augustus-gene-10.47-mRNA-1            | Japonica | Indica |        | Os01g0118400 | OsR498G0100059400.01.T01  | Glycosyltransferase family 61 protein                                    |
| maker-1-augustus-gene-10.50-mRNA-1            | Japonica | NA     |        | Os01g0118600 | OsR498G0100060400.01.T01  | Putative glycosyltransferase AGO61                                       |
| maker-1-augustus-gene-10.53-mRNA-1            | Japonica | NA     |        | Os01g0118700 | OsR498G0100060600.01.T01  | Glycosyltransferase, HGA-like, expressed                                 |
| maker-1-augustus-gene-10.57-mRNA-1            | Japonica | NA     |        | Os01g0119000 | OsR498G0100061000.01.T01  | Putative glycosyltransferase AGO61                                       |
| maker-1-augustus-gene-10.59-mRNA-1            | Japonica | Indica |        | Os01g0119100 | OsR498G0100062400.01.T02  | protein O-linked-mannose beta-1,4-N-acetylglucosaminyltransferase 2-like |
| maker-1-augustus-gene-100.0-mRNA-1            | Japonica | NA     |        | Os01g0279300 | OsR498G0100066800.01.T01  | Calmodulin                                                               |
| maker-1-augustus-gene-100.10-mRNA-1           | Japonica | NA     |        | Os12g0170100 | OsR498G01000672300.01.T01 | Pentatricopeptide repeat-containing protein mitochondrial                |
| maker-1-augustus-gene-100.13-mRNA-1           | Japonica | NA     |        | Os01g0279400 | OsR498G01000669200.01.T01 | MFS domain-containing protein                                            |
| maker-1-augustus-gene-100.2-mRNA-1            | Japonica | NA     |        | Os01g0279700 | OsR498G01000670100.01.T03 | Probable anion transporter 1, chloroplastic                              |
| maker-1-augustus-gene-100.20-mRNA-1           | Japonica | NA     | LRR-TM | Os01g0279800 | OsR498G01000670400.01.T01 | Somatic embryoproteins receptor kinase 5                                 |
| maker-1-augustus-gene-100.23-mRNA-1           | Japonica | NA     |        | Os01g0280000 | OsR498G01000671400.01.T02 | Cell death-related nuclease 4                                            |
| maker-1-augustus-gene-100.27-mRNA-1           | Japonica | NA     |        | Os01g0280500 | OsR498G01000672600.01.T01 | Eukaryotic translation initiation factor 6                               |
| maker-1-augustus-gene-100.6-mRNA-1            | Japonica | NA     |        | Os01g0279900 | OsR498G01000671100.01.T04 | Transcription factor TGAL1                                               |
| maker-1-augustus-gene-101.0-mRNA-1            | Japonica | NA     |        | Os01g0281000 | OsR498G01000674900.01.T01 | F-box family protein isoform 1                                           |
| maker-1-augustus-gene-101.13-mRNA-1           | Japonica | NA     |        | Os01g0281600 | OsR498G01000676600.01.T01 | Phytoecyanin domain-containing protein (Fragment)                        |
| maker-1-augustus-gene-101.3-mRNA-1            | Japonica | Indica |        | Os01g0281100 | OsR498G01000675200.01.T01 |                                                                          |
| maker-1-augustus-gene-101.7-mRNA-1            | Japonica | Indica |        | Os01g0281200 | OsR498G01000675400.01.T01 | Cyclin N-terminal domain-containing protein                              |
| maker-1-augustus-gene-101.9-mRNA-1            | Japonica | Indica |        | Os11g0174000 | OsR498G01000676000.01.T02 | Coatomer subunit beta                                                    |
| maker-1-augustus-gene-102.0-mRNA-1            | Japonica | NA     |        | Os01g0283100 | OsR498G01000679900.01.T01 | Gamma carbonic anhydrase 1 mitochondrial                                 |
| maker-1-augustus-gene-102.10-mRNA-1           | Japonica | NA     |        | Os01g0282800 | OsR498G01000678600.01.T01 | Tubulin beta chain                                                       |
| maker-1-augustus-gene-102.12-mRNA-1           | Japonica | NA     |        | Os01g0283000 | OsR498G01000679800.01.T02 | Nucleotide-diphospho-sugar transferase                                   |
| maker-1-augustus-gene-102.14-mRNA-1           | Japonica | NA     |        | Os01g0283500 | OsR498G01000681000.01.T01 | Rhomboid-like protein 14, mitochondrial                                  |
| maker-1-augustus-gene-102.16-mRNA-1           | Japonica | NA     |        | Os01g0284500 | OsR498G01000684800.01.T01 | Germin-like protein 1-1                                                  |
| maker-1-augustus-gene-102.5-mRNA-1            | Japonica | NA     |        | Os01g0283600 | OsR498G01000681500.01.T01 | Epimerase domain-containing protein (Fragment)                           |
| maker-1-augustus-gene-102.8-mRNA-1            | Japonica | NA     |        | Os01g0283700 | OsR498G01000683300.01.T01 | Epimerase domain-containing protein (Fragment)                           |
| maker-1-augustus-gene-103.44-mRNA-1           | Japonica | Indica |        | Os05g0103200 | OsR498G01000687900.01.T04 | Peptidyl-prolyl cis-trans isomerase                                      |
| maker-1-augustus-gene-103.47-mRNA-1           | Japonica | NA     |        |              |                           |                                                                          |
| maker-1-augustus-gene-103.51-mRNA-1           | Japonica | NA     |        | Os01g0284900 | OsR498G01000688400.01.T01 | Bromodomain adjacent to zinc finger domain protein 2B-like               |
| maker-1-augustus-gene-103.53-mRNA-1           | Japonica | NA     |        |              | OsR498G01000689400.01.T01 | Berberine bridge enzyme-like 27                                          |
| maker-1-augustus-gene-103.55-mRNA-1           | Japonica | NA     |        | Os01g0285300 | OsR498G01000690200.01.T01 | Transcription factor MYB61                                               |
| maker-1-augustus-gene-103.58-mRNA-1           | Japonica | NA     |        | Os01g0286100 | OsR498G01000694000.01.T01 | Transcription factor APG                                                 |
| maker-1-augustus-gene-104.0-mRNA-1            | Japonica | NA     |        | Os01g0286600 | OsR498G01000695700.01.T01 | Chloroplast protoporphyrinogen IX oxidase                                |
| maker-1-augustus-gene-104.10-mRNA-1           | Japonica | NA     |        | Os01g0287600 | OsR498G01000702400.01.T01 | Class II chitinase                                                       |
| maker-1-augustus-gene-104.12-mRNA-1           | Japonica | NA     |        |              | OsR498G01000702600.01.T08 |                                                                          |
| maker-1-augustus-gene-104.6-mRNA-1            | Japonica | Indica |        | Os01g0286900 | OsR498G01000698500.01.T01 | Auxin-responsive protein IAA4                                            |
| maker-1-augustus-gene-104.8-mRNA-1            | Japonica | Indica |        | Os06g0620000 | OsR498G01000695400.01.T01 |                                                                          |
| maker-1-augustus-gene-105.0-mRNA-1            | Japonica | NA     |        | Os01g0288200 |                           | Phosphatase methylesterase 1                                             |
| maker-1-augustus-gene-105.3-mRNA-1            | Japonica | NA     |        | Os03g0114600 | OsR498G0612855600.01.T01  | Transposable element protein, putative, MuDR                             |
| maker-1-augustus-gene-106.0-mRNA-1            | Japonica | NA     |        |              | OsR498G01000708900.01.T01 | WRKY transcription factor                                                |
| maker-1-augustus-gene-106.1-mRNA-1            | Japonica | NA     |        | Os01g0289900 |                           | Anthocyanin 5-aromatic acyltransferase                                   |
| maker-1-augustus-gene-106.3-mRNA-1            | Japonica | NA     |        | Os01g0290000 |                           | Retrotransposon protein SINE subclass                                    |
| maker-1-augustus-gene-106.5-mRNA-1            | Japonica | NA     |        | Os01g0290300 |                           | Putative HAT, C-terminal dimerization domain-containing protein          |



|                                     |          |          |            |              |                           |                                                                        |
|-------------------------------------|----------|----------|------------|--------------|---------------------------|------------------------------------------------------------------------|
| maker-1-augustus-gene-106.7-mRNA-1  | Japonica | NA       |            |              | OsR498G0100712200.01.T02  | ABC transporter B family member 4                                      |
| maker-1-augustus-gene-107.29-mRNA-1 | Japonica | NA       | Kinase-TM  | Os01g0292200 | OsR498G0100720500.01.T01  | Non-specific serine/threonine protein kinase                           |
| maker-1-augustus-gene-107.39-mRNA-1 | Japonica | NA       |            | Os01g0291500 | OsR498G0100715000.01.T01  | Acyl transferase 4                                                     |
| maker-1-augustus-gene-108.0-mRNA-1  | Japonica | NA       |            | Os01g0292900 | OsR498G0100721700.01.T06  | SBP-type domain-containing protein                                     |
| maker-1-augustus-gene-108.11-mRNA-1 | Japonica | Japonica |            | Os01g0293900 | OsR498G0100724000.01.T01  | Peroxidase                                                             |
| maker-1-augustus-gene-108.13-mRNA-1 | Japonica | Indica   |            | Os01g0294700 | OsR498G0100725400.01.T01  | Peroxidase                                                             |
| maker-1-augustus-gene-108.15-mRNA-1 | Japonica | Indica   |            | Os05g0134800 | OsR498G0100725400.01.T01  | Peroxidase                                                             |
| maker-1-augustus-gene-108.17-mRNA-1 | Japonica | NA       |            | Os01g0294700 | OsR498G0100726000.01.T01  | Peroxidase                                                             |
| maker-1-augustus-gene-108.5-mRNA-1  | Japonica | NA       |            | Os01g0293100 | OsR498G0100722600.01.T01  | Transcription factor TIP2                                              |
| maker-1-augustus-gene-108.7-mRNA-1  | Japonica | NA       |            | Os07g0157000 | OsR498G0100723800.01.T01  | Peroxidase                                                             |
| maker-1-augustus-gene-109.10-mRNA-1 | Japonica | Japonica |            | Os01g0296200 | OsR498G0100728900.01.T01  | Polygalacturonase                                                      |
| maker-1-augustus-gene-109.14-mRNA-1 | Japonica | NA       |            |              | OsR498G0100727400.01.T01  | Protein kinase domain-containing protein                               |
| maker-1-augustus-gene-109.17-mRNA-1 | Japonica | NA       |            | Os01g0295700 | OsR498G0100727600.01.T01  | Protein-serine/threonine phosphatase                                   |
| maker-1-augustus-gene-109.26-mRNA-1 | Japonica | NA       | Kinase-TM  | Os01g0296000 | OsR498G0100728600.01.T01  | Putative LRR receptor-like serine/threonine-protein kinase             |
| maker-1-augustus-gene-109.5-mRNA-1  | Japonica | NA       | Kinase-TM  | Os01g0296100 | OsR498G0100728700.01.T04  | Non-specific serine/threonine protein kinase                           |
| maker-1-augustus-gene-11.42-mRNA-1  | Japonica | NA       |            |              | OsR498G0100063700.01.T01  | Ubiquitin-like domain-containing protein                               |
| maker-1-augustus-gene-11.44-mRNA-1  | Japonica | NA       |            |              | OsR498G0100063900.01.T01  | Ubiquitin-like domain-containing protein                               |
| maker-1-augustus-gene-110.50-mRNA-1 | Japonica | Indica   |            | Os01g0296700 | OsR498G0100730500.01.T01  | Beta-xylosidasealpha-l-arabinofuranosidase 1                           |
| maker-1-augustus-gene-110.52-mRNA-1 | Japonica | Japonica |            | Os01g0296900 | OsR498G0100730900.01.T01  | Adenosinetriphosphatase                                                |
| maker-1-augustus-gene-110.55-mRNA-1 | Japonica | NA       |            | Os01g0297200 | OsR498G0100731500.01.T01  | Adenosinetriphosphatase                                                |
| maker-1-augustus-gene-110.57-mRNA-1 | Japonica | NA       |            | Os01g0297700 | OsR498G0100733500.01.T02  |                                                                        |
| maker-1-augustus-gene-110.59-mRNA-1 | Japonica | NA       |            |              | OsR498G1222106000.01.T03  |                                                                        |
| maker-1-augustus-gene-110.60-mRNA-1 | Japonica | NA       |            | Os04g0564200 | OsR498G1222106000.01.T02  | TPX2 domain-containing protein                                         |
| maker-1-augustus-gene-111.0-mRNA-1  | Japonica | NA       |            |              | OsR498G0100736700.01.T01  | Pentatricopeptide repeat-containing protein                            |
| maker-1-augustus-gene-111.13-mRNA-1 | Japonica | Japonica |            | Os01g0299100 | OsR498G02002947900.01.T01 | Transposon protein, putative, CACTA, En/Spm sub-class                  |
| maker-1-augustus-gene-111.16-mRNA-1 | Japonica | Japonica |            | Os01g0299300 | OsR498G0100737000.01.T01  | Acyltransferase family protein, expressed                              |
| maker-1-augustus-gene-111.18-mRNA-1 | Japonica | Indica   |            | Os01g0299500 | OsR498G0100737600.01.T03  | PAB-dependent poly(A)-specific ribonuclease                            |
| maker-1-augustus-gene-111.2-mRNA-1  | Japonica | NA       |            | Os01g0299400 | OsR498G0100737300.01.T01  | IGR protein motif                                                      |
| maker-1-augustus-gene-111.21-mRNA-1 | Japonica | NA       |            | Os01g0300200 | OsR498G0100740400.01.T01  | ATP citrate synthase                                                   |
| maker-1-augustus-gene-111.28-mRNA-1 | Japonica | NA       |            |              | OsR498G0100742000.01.T01  | Carbohydrate-binding-like fold                                         |
| maker-1-augustus-gene-112.30-mRNA-1 | Japonica | NA       |            | Os01g0300900 | OsR498G0100743700.01.T01  | Rab9 effector protein with kelch motifs                                |
| maker-1-augustus-gene-112.33-mRNA-1 | Japonica | NA       |            | Os01g0301000 | OsR498G0100744000.01.T01  | Pentatricopeptide repeat-containing protein mitochondrial              |
| maker-1-augustus-gene-112.35-mRNA-1 | Japonica | Japonica |            | Os01g0301500 | OsR498G0100745200.01.T01  | Pentatricopeptide repeat-containing protein mitochondrial              |
| maker-1-augustus-gene-112.37-mRNA-1 | Japonica | NA       |            | Os01g0301700 | OsR498G0100745600.01.T02  | Pentatricopeptide repeat-containing protein                            |
| maker-1-augustus-gene-112.39-mRNA-1 | Japonica | NA       |            | Os01g0301900 |                           |                                                                        |
| maker-1-augustus-gene-113.37-mRNA-1 | Japonica | NA       |            |              |                           | Knotted1-like homeodomain protein liguleless3 (Fragment)               |
| maker-1-augustus-gene-113.39-mRNA-1 | Japonica | NA       |            | Os01g0303200 | OsR498G0100750500.01.T05  |                                                                        |
| maker-1-augustus-gene-113.45-mRNA-1 | Japonica | NA       |            | Os01g0303800 | OsR498G0100752500.01.T04  | USP-like protein isoform 3                                             |
| maker-1-augustus-gene-113.48-mRNA-1 | Japonica | Indica   |            | Os03g0305600 | OsR498G0100750800.01.T02  | Outer envelope pore protein like                                       |
| maker-1-augustus-gene-113.53-mRNA-1 | Japonica | NA       |            | Os01g0303600 | OsR498G0100751600.01.T01  | RING-CH-type domain-containing protein                                 |
| maker-1-augustus-gene-114.0-mRNA-1  | Japonica | Indica   |            | Os05g0531500 | OsR498G0100753700.01.T01  | Inner membrane protein oxaA                                            |
| maker-1-augustus-gene-114.3-mRNA-1  | Japonica | NA       |            |              |                           | Endosulphine                                                           |
| maker-1-augustus-gene-114.8-mRNA-1  | Japonica | NA       |            |              | OsR498G0100753400.01.T02  | Cation-chloride cotransporter 1                                        |
| maker-1-augustus-gene-115.3-mRNA-1  | Japonica | NA       |            | Os01g0306800 | OsR498G0100761500.01.T03  | 4-hydroxy-3-methylbut-2-enyl diphosphatereductase                      |
| maker-1-augustus-gene-115.9-mRNA-1  | Japonica | NA       |            | Os01g0306900 | OsR498G0100762200.01.T01  |                                                                        |
| maker-1-augustus-gene-116.31-mRNA-1 | Japonica | NA       | LRR-NBS-TM | Os01g0308300 | OsR498G0100770300.01.T01  | Putative NB-ARC domain-containing protein (Fragment)                   |
| maker-1-augustus-gene-116.33-mRNA-1 | Japonica | NA       |            | Os01g0307500 | OsR498G0100765000.01.T01  | High affinity potassium transporter 2                                  |
| maker-1-augustus-gene-116.35-mRNA-1 | Japonica | Indica   |            | Os05g0357800 | OsR498G0100767800.01.T04  | Lysophospholipid acyltransferase LPEAT1                                |
| maker-1-augustus-gene-116.40-mRNA-1 | Japonica | NA       |            |              | OsR498G0100768200.01.T01  | Embryonic abundant protein-like                                        |
| maker-1-augustus-gene-117.0-mRNA-1  | Japonica | NA       |            | Os01g0309800 | OsR498G0100775700.01.T02  | HMA domain-containing protein                                          |
| maker-1-augustus-gene-117.2-mRNA-1  | Japonica | NA       |            | Os01g0309900 | OsR498G0100776100.01.T01  | Mono-/di-acylglycerol lipase N-terminal                                |
| maker-1-augustus-gene-118.0-mRNA-1  | Japonica | Japonica | Kinase-TM  | Os01g0310400 | OsR498G0100776900.01.T03  | Wall-associated receptor kinase 5                                      |
| maker-1-augustus-gene-118.12-mRNA-1 | Japonica | Japonica |            | Os01g0311500 | OsR498G0100779100.01.T02  | Dual specificity protein phosphatase PHS1                              |
| maker-1-augustus-gene-118.18-mRNA-1 | Japonica | NA       |            | Os01g0311700 | OsR498G0100779700.01.T01  | Pectin methyl esterase inhibitor                                       |
| maker-1-augustus-gene-118.20-mRNA-1 | Japonica | NA       |            |              | OsR498G0100776800.01.T04  | Phospholipase D                                                        |
| maker-1-augustus-gene-118.27-mRNA-1 | Japonica | NA       |            | Os01g0311800 | OsR498G0100780000.01.T01  | Pectinesterase                                                         |
| maker-1-augustus-gene-118.4-mRNA-1  | Japonica | Japonica |            | Os01g0310500 | OsR498G0409269800.01.T05  | Protein kinase domain-containing protein                               |
| maker-1-augustus-gene-118.6-mRNA-1  | Japonica | Indica   | Kinase-TM  | Os01g0310400 | OsR498G0100778100.01.T02  | PT11-like tyrosine-protein kinase 3                                    |
| maker-1-augustus-gene-119.0-mRNA-1  | Japonica | Indica   |            | Os01g0312500 | OsR498G0100781700.01.T01  | Pectinesterase                                                         |
| maker-1-augustus-gene-119.10-mRNA-1 | Japonica | NA       |            |              |                           | Peripheral subunit-binding (PSBD) domain-containing protein (Fragment) |
| maker-1-augustus-gene-119.14-mRNA-1 | Japonica | NA       |            | Os01g0314300 | OsR498G0100786800.01.T01  | MCT-1 like PUA RNA binding-domain containing protein                   |

|                                     |          |          |               |              |                          |                                                                         |
|-------------------------------------|----------|----------|---------------|--------------|--------------------------|-------------------------------------------------------------------------|
| maker-1-augustus-gene-119.4-mRNA-1  | Japonica | NA       |               | Os01g0312800 | OsR498G0100782500.01.T01 | Endoglucanase                                                           |
| maker-1-augustus-gene-119.6-mRNA-1  | Japonica | NA       |               | Os01g0313300 | OsR498G0100785100.01.T01 | Ethylene-responsive transcription factor 1                              |
| maker-1-augustus-gene-119.8-mRNA-1  | Japonica | NA       |               |              | OsR498G0100786200.01.T01 | Dihydrolipoamide acetyltransferase component of pyruvate dehydrogenase  |
| maker-1-augustus-gene-120.24-mRNA-1 | Japonica | Indica   |               | Os05g0363100 | OsR498G0100791300.01.T02 | Caffeoylshikimate esterase                                              |
| maker-1-augustus-gene-120.31-mRNA-1 | Japonica | Indica   |               | Os01g0314800 | OsR498G0100789400.01.T01 | Indole-3-acetic acid-induced protein ARG2-like                          |
| maker-1-augustus-gene-120.33-mRNA-1 | Japonica | NA       |               | Os01g0315800 | OsR498G0100791600.01.T01 | UDP-glucuronic acid decarboxylase                                       |
| maker-1-augustus-gene-121.0-mRNA-1  | Japonica | NA       |               | Os01g0316600 | OsR498G0100794100.01.T01 | Serine/arginine-rich-splicing factor SR34                               |
| maker-1-augustus-gene-121.16-mRNA-1 | Japonica | NA       |               | Os01g0316500 | OsR498G0100793800.01.T02 | LVR motif-containing protein 7 isoform 2                                |
| maker-1-augustus-gene-121.9-mRNA-1  | Japonica | Indica   |               | Os01g0316900 | OsR498G0100795100.01.T03 |                                                                         |
| maker-1-augustus-gene-122.35-mRNA-1 | Japonica | NA       |               |              | OsR498G0100800300.01.T03 | Protein ABC transporter 1 mitochondrial                                 |
| maker-1-augustus-gene-122.40-mRNA-1 | Japonica | NA       |               | Os01g0319000 | OsR498G0100800900.01.T01 | Pectin acetyltransferase                                                |
| maker-1-augustus-gene-122.45-mRNA-1 | Japonica | NA       |               |              | OsR498G0100801300.01.T01 |                                                                         |
| maker-1-augustus-gene-122.47-mRNA-1 | Japonica | NA       |               | Os01g0319200 | OsR498G0100803600.01.T01 |                                                                         |
| maker-1-augustus-gene-123.24-mRNA-1 | Japonica | NA       |               | Os01g0320400 | OsR498G0100809600.01.T01 |                                                                         |
| maker-1-augustus-gene-124.0-mRNA-1  | Japonica | NA       |               | Os01g0321800 | OsR498G0100814500.01.T01 | NEFA-interacting nuclear protein NIP30                                  |
| maker-1-augustus-gene-124.14-mRNA-1 | Japonica | NA       |               | Os01g0321700 | OsR498G0100814400.01.T01 | Protein transport protein SEC23                                         |
| maker-1-augustus-gene-124.17-mRNA-1 | Japonica | NA       |               | Os01g0322800 | OsR498G0100817200.01.T01 | Suppressor of mec-8 and unc-52 protein 1                                |
| maker-1-augustus-gene-124.2-mRNA-1  | Japonica | NA       | Kinase-TM     | Os01g0323000 | OsR498G0100818500.01.T02 | Serine/threonine protein kinase                                         |
| maker-1-augustus-gene-124.7-mRNA-1  | Japonica | NA       |               |              |                          | Chloroplast protein-transporting ATPase                                 |
| maker-1-augustus-gene-125.0-mRNA-1  | Japonica | NA       |               | Os01g0323300 |                          | CRS2-associated factor 2, chloroplastic                                 |
| maker-1-augustus-gene-125.5-mRNA-1  | Japonica | NA       |               |              |                          | Sulfotransferase                                                        |
| maker-1-augustus-gene-125.7-mRNA-1  | Japonica | NA       | Kinase-TM     | Os01g0323100 | OsR498G0100818800.01.T01 | Pto-interacting protein 1                                               |
| maker-1-augustus-gene-125.9-mRNA-1  | Japonica | NA       |               |              | OsR498G0100824600.01.T01 |                                                                         |
| maker-1-augustus-gene-126.0-mRNA-1  | Japonica | NA       |               | Os01g0326000 | OsR498G0100830700.01.T01 | Peroxidase                                                              |
| maker-1-augustus-gene-126.2-mRNA-1  | Japonica | NA       |               | Os01g0326100 | OsR498G0100832100.01.T01 | Peroxidase                                                              |
| maker-1-augustus-gene-126.3-mRNA-1  | Japonica | Indica   |               | Os01g0326000 | OsR498G0100832100.01.T01 | Peroxidase                                                              |
| maker-1-augustus-gene-127.0-mRNA-1  | Japonica | Japonica |               | Os01g0327000 | OsR498G0100832700.01.T01 | Peroxidase                                                              |
| maker-1-augustus-gene-127.10-mRNA-1 | Japonica | NA       |               |              | OsR498G0100834200.01.T07 | Putative inactive serine/threonine-protein kinase lvsG                  |
| maker-1-augustus-gene-127.14-mRNA-1 | Japonica | Japonica |               | Os01g0327900 | OsR498G0100834400.01.T01 | DUF295 domain-containing protein                                        |
| maker-1-augustus-gene-127.3-mRNA-1  | Japonica | NA       |               | Os01g0327100 | OsR498G0100833100.01.T01 | Peroxidase                                                              |
| maker-1-augustus-gene-127.5-mRNA-1  | Japonica | NA       |               | Os01g0327400 | OsR498G0100833700.01.T03 | Peroxidase                                                              |
| maker-1-augustus-gene-127.7-mRNA-1  | Japonica | NA       |               | Os01g0328200 |                          |                                                                         |
| maker-1-augustus-gene-128.33-mRNA-1 | Japonica | NA       |               | Os01g0328500 | OsR498G0100834900.01.T03 | BCNT-C domain-containing protein (Fragment)                             |
| maker-1-augustus-gene-128.35-mRNA-1 | Japonica | NA       |               | Os01g0328600 | OsR498G0100835100.01.T06 | Polyketide cyclase/dehydrase and lipid transport superfamily protein    |
| maker-1-augustus-gene-128.41-mRNA-1 | Japonica | NA       |               | Os01g0329300 | OsR498G0100840300.01.T01 | Polygalacturonase                                                       |
| maker-1-augustus-gene-128.43-mRNA-1 | Japonica | NA       |               | Os01g0329800 | OsR498G0100841100.01.T01 | Evolutionarily conserved C-terminal region 7                            |
| maker-1-augustus-gene-128.45-mRNA-1 | Japonica | NA       |               | Os01g0328700 | OsR498G0100835400.01.T01 | Dihydrolipoyl dehydrogenase                                             |
| maker-1-augustus-gene-128.47-mRNA-1 | Japonica | NA       |               | Os01g0328900 | OsR498G0100836400.01.T01 | Hydroxyproline O-galactosyltransferase GALT3                            |
| maker-1-augustus-gene-128.52-mRNA-1 | Japonica | NA       |               | Os01g0329000 | OsR498G0100836600.01.T01 | PlsC domain-containing protein (Fragment)                               |
| maker-1-augustus-gene-128.54-mRNA-1 | Japonica | NA       |               | Os01g0329400 | OsR498G0100840600.01.T01 | Solute carrier family 25 member like                                    |
| maker-1-augustus-gene-129.37-mRNA-1 | Japonica | NA       |               |              | OsR498G0100842700.01.T03 | GDSL esterase/lipase                                                    |
| maker-1-augustus-gene-129.40-mRNA-1 | Japonica | NA       |               | Os01g0330300 | OsR498G0100843300.01.T01 | Putative cysteine protease                                              |
| maker-1-augustus-gene-129.42-mRNA-1 | Japonica | NA       |               | Os01g0330500 | OsR498G0714577900.01.T01 | Organic cation/carnitine transporter 3                                  |
| maker-1-augustus-gene-129.44-mRNA-1 | Japonica | Indica   |               | Os01g0329900 | OsR498G0100845700.01.T01 | GDSL esterase/lipase                                                    |
| maker-1-augustus-gene-129.46-mRNA-1 | Japonica | NA       |               | Os01g0330200 | OsR498G0100843200.01.T01 | Cysteine protease 1                                                     |
| maker-1-augustus-gene-13.50-mRNA-1  | Japonica | NA       |               |              | OsR498G0100083100.01.T01 | RING-type E3 ubiquitin transferase                                      |
| maker-1-augustus-gene-13.60-mRNA-1  | Japonica | NA       |               | Os01g0124601 | OsR498G0100082800.01.T01 | Putative Bowman Birk trypsin inhibitor                                  |
| maker-1-augustus-gene-130.26-mRNA-1 | Japonica | NA       |               | Os01g0331900 | OsR498G0100847500.01.T01 | Golgi apparatus membrane protein TVP23                                  |
| maker-1-augustus-gene-130.30-mRNA-1 | Japonica | NA       |               | Os01g0332100 | OsR498G0100848700.01.T01 | Beta-fructofuranosidase                                                 |
| maker-1-augustus-gene-130.36-mRNA-1 | Japonica | NA       |               | Os01g0332500 | OsR498G0100849700.01.T01 | Carboxypeptidase                                                        |
| maker-1-augustus-gene-130.42-mRNA-1 | Japonica | NA       |               | Os01g0332800 | OsR498G0100850400.01.T01 | Carboxypeptidase                                                        |
| maker-1-augustus-gene-130.45-mRNA-1 | Japonica | Indica   |               | Os01g0332900 | OsR498G0100851000.01.T01 | Immediate-early protein RSP40                                           |
| maker-1-augustus-gene-133.35-mRNA-1 | Japonica | NA       |               | Os01g0336300 |                          | DUF4220 domain-containing protein (Fragment)                            |
| maker-1-augustus-gene-133.39-mRNA-1 | Japonica | NA       |               | Os01g0337100 |                          | Sesquithujene synthase A                                                |
| maker-1-augustus-gene-133.42-mRNA-1 | Japonica | NA       | CC-LRR-NBS-TM | Os01g0335700 | OsR498G0100857600.01.T01 | Putative NB-ARC domain-containing protein (Fragment)                    |
| maker-1-augustus-gene-134.0-mRNA-1  | Japonica | NA       |               | Os01g0337500 | OsR498G0100861300.01.T01 | H(+)-exporting diphosphatase                                            |
| maker-1-augustus-gene-134.10-mRNA-1 | Japonica | NA       |               | Os01g0338000 | OsR498G0100862700.01.T01 | GTP-binding protein SAR1A                                               |
| maker-1-augustus-gene-134.13-mRNA-1 | Japonica | NA       |               |              | OsR498G0100863100.01.T05 | Transcription initiation factor TFIID subunit like                      |
| maker-1-augustus-gene-134.21-mRNA-1 | Japonica | NA       |               | Os01g0337600 | OsR498G0100861600.01.T01 | SMK-1 domain-containing protein                                         |
| maker-1-augustus-gene-134.26-mRNA-1 | Japonica | NA       |               | Os01g0338600 | OsR498G0100864800.01.T03 | Cysteine sulfinate desulfinate/cysteine desulfurase and related enzymes |
| maker-1-augustus-gene-134.4-mRNA-1  | Japonica | NA       |               | Os01g0337900 | OsR498G0100862300.01.T01 | Putative lipamide dehydrogenase                                         |

|                                     |          |          |           |              |                          |                                                                            |
|-------------------------------------|----------|----------|-----------|--------------|--------------------------|----------------------------------------------------------------------------|
| maker-1-augustus-gene-135.1-mRNA-1  | Japonica | Indica   |           | Os01g0339600 | OsR498G0100866300.01.T03 | Proteasome assembly chaperone 3                                            |
| maker-1-augustus-gene-135.11-mRNA-1 | Japonica | Indica   |           | Os01g0339500 | OsR498G0100866200.01.T01 | No apical meristem protein, expressed                                      |
| maker-1-augustus-gene-135.4-mRNA-1  | Japonica | NA       |           | Os01g0339900 | OsR498G0100866500.01.T01 | Protein disulfide-isomerase                                                |
| maker-1-augustus-gene-137.38-mRNA-1 | Japonica | NA       |           | Os01g0342900 | OsR498G0100882300.01.T01 | Acyl-activating enzyme 9                                                   |
| maker-1-augustus-gene-137.54-mRNA-1 | Japonica | NA       |           | Os01g0342800 | OsR498G0100881200.01.T01 | LXR motif-containing protein (Fragment)                                    |
| maker-1-augustus-gene-137.56-mRNA-1 | Japonica | NA       |           |              | OsR498G0100885800.01.T04 | Lipoprotein Nlpl                                                           |
| maker-1-augustus-gene-139.1-mRNA-1  | Japonica | NA       |           | Os01g0346501 |                          | Transposon protein, putative, CACTA, En/Spm sub-class                      |
| maker-1-augustus-gene-139.11-mRNA-1 | Japonica | Indica   |           | Os01g0347100 | OsR498G0100897400.01.T02 | Glycine-rich domain-containing protein 1                                   |
| maker-1-augustus-gene-139.4-mRNA-1  | Japonica | Japonica |           | Os01g0346600 | OsR498G0100894900.01.T01 |                                                                            |
| maker-1-augustus-gene-139.5-mRNA-1  | Japonica | NA       |           | Os01g0347000 | OsR498G0100897100.01.T01 | Dual specificity protein phosphatase 4                                     |
| maker-1-augustus-gene-14.41-mRNA-1  | Japonica | NA       |           | Os01g0125800 | OsR498G0100085300.01.T01 | Actin-interacting protein 1-2                                              |
| maker-1-augustus-gene-14.45-mRNA-1  | Japonica | Indica   |           | Os01g0125900 | OsR498G0100085500.01.T03 | UBC core domain-containing protein (Fragment)                              |
| maker-1-augustus-gene-14.49-mRNA-1  | Japonica | NA       |           | Os01g0126100 | OsR498G0100086500.01.T01 | Multicopper oxidase, type 1                                                |
| maker-1-augustus-gene-14.51-mRNA-1  | Japonica | NA       |           | Os01g0126200 | OsR498G0100086900.01.T05 | Cupredoxin superfamily protein isoform 1                                   |
| maker-1-augustus-gene-14.53-mRNA-1  | Japonica | NA       |           |              |                          | Factor of DNA methylation 1                                                |
| maker-1-augustus-gene-14.55-mRNA-1  | Japonica | NA       |           | Os01g0126900 | OsR498G0100087500.01.T01 | Multicopper oxidase LPR1                                                   |
| maker-1-augustus-gene-14.58-mRNA-1  | Japonica | NA       |           | Os01g0125700 | OsR498G0100085200.01.T02 | Glutaryl-tRNA (Gln) amidotransferase subunit C, mitochondrial              |
| maker-1-augustus-gene-140.41-mRNA-1 | Japonica | Indica   |           | Os01g0330200 | OsR498G0100899700.01.T01 | Cysteine proteinase Cathepsin L                                            |
| maker-1-augustus-gene-140.43-mRNA-1 | Japonica | NA       |           | Os01g0348000 | OsR498G0100899600.01.T01 | Putative cysteine protease                                                 |
| maker-1-augustus-gene-140.45-mRNA-1 | Japonica | NA       |           | Os01g0348600 | OsR498G0100901300.01.T01 | 3-hydroxyacyl-CoA dehydrogenase                                            |
| maker-1-augustus-gene-140.53-mRNA-1 | Japonica | NA       |           | Os01g0347500 | OsR498G0100899600.01.T01 | Putative cysteine protease                                                 |
| maker-1-augustus-gene-140.55-mRNA-1 | Japonica | Indica   |           | Os01g0330200 | OsR498G0100900600.01.T01 | Cysteine proteinase Cathepsin L                                            |
| maker-1-augustus-gene-140.57-mRNA-1 | Japonica | NA       |           | Os01g0348900 | OsR498G0100902200.01.T02 | Jacalin-like lectin domain containing protein, expressed                   |
| maker-1-augustus-gene-141.26-mRNA-1 | Japonica | NA       |           | Os01g0349800 | OsR498G0100904900.01.T01 | Secologanin synthase                                                       |
| maker-1-augustus-gene-141.29-mRNA-1 | Japonica | Indica   |           | Os05g0154600 | OsR498G0100907900.01.T03 | E3 ubiquitin-protein ligase RFI2 isoform X1                                |
| maker-1-augustus-gene-141.34-mRNA-1 | Japonica | NA       |           | Os01g0349400 | OsR498G0100904600.01.T01 | Serine/threonine-protein phosphatase                                       |
| maker-1-augustus-gene-141.37-mRNA-1 | Japonica | NA       | NBS-TM    |              | OsR498G0100907000.01.T01 | NB-ARC domain-containing protein                                           |
| maker-1-augustus-gene-141.39-mRNA-1 | Japonica | NA       |           | Os01g0350500 | OsR498G0100907200.01.T01 |                                                                            |
| maker-1-augustus-gene-142.27-mRNA-1 | Japonica | NA       |           | Os01g0351100 | OsR498G0100908700.01.T01 | Poly [ADP-ribose] polymerase                                               |
| maker-1-augustus-gene-142.31-mRNA-1 | Japonica | NA       |           |              | OsR498G0100909100.01.T04 | Poly [ADP-ribose] polymerase                                               |
| maker-1-augustus-gene-142.40-mRNA-1 | Japonica | NA       |           | Os01g0352100 | OsR498G0100913700.01.T01 | Fe2OG dioxygenase domain-containing protein (Fragment)                     |
| maker-1-augustus-gene-143.37-mRNA-1 | Japonica | NA       |           | Os01g0353400 | OsR498G0100914900.01.T01 | Glutathione S-transferase IV                                               |
| maker-1-augustus-gene-143.39-mRNA-1 | Japonica | NA       |           | Os03g0228400 | OsR498G0305498900.01.T01 | AP complex subunit sigma                                                   |
| maker-1-augustus-gene-143.49-mRNA-1 | Japonica | NA       |           |              | OsR498G0100914600.01.T01 |                                                                            |
| maker-1-augustus-gene-143.51-mRNA-1 | Japonica | NA       |           |              | OsR498G0100916200.01.T01 | Jacalin-type lectin domain-containing protein                              |
| maker-1-augustus-gene-144.0-mRNA-1  | Japonica | NA       |           |              | OsR498G0100916700.01.T02 | Polynucleotide 5'-hydroxyl-kinase NOL9                                     |
| maker-1-augustus-gene-144.14-mRNA-1 | Japonica | NA       |           | Os01g0355500 | OsR498G0100918400.01.T02 | Auxilin-related protein 1                                                  |
| maker-1-augustus-gene-144.8-mRNA-1  | Japonica | NA       |           |              | OsR498G0100916600.01.T04 | Sterol C-14 reductase                                                      |
| maker-1-augustus-gene-145.10-mRNA-1 | Japonica | NA       |           |              | OsR498G0100920800.01.T01 | Multidrug resistance-associated protein/mitoxantrone resistance protein, A |
| maker-1-augustus-gene-145.14-mRNA-1 | Japonica | Indica   |           | Os01g0356500 | OsR498G0100923200.01.T02 | Thiamine pyrophosphokinase                                                 |
| maker-1-augustus-gene-145.5-mRNA-1  | Japonica | NA       |           | Os01g0355800 | OsR498G0100920300.01.T01 | Methylesterase 7                                                           |
| maker-1-augustus-gene-145.7-mRNA-1  | Japonica | NA       |           | Os01g0355900 | OsR498G0100920600.01.T01 | Ubiquitin-like-specific protease ESD4                                      |
| maker-1-augustus-gene-146.36-mRNA-1 | Japonica | NA       |           | Os01g0356800 |                          | AIG1-type G domain-containing protein                                      |
| maker-1-augustus-gene-146.38-mRNA-1 | Japonica | Indica   |           | Os01g0357100 | OsR498G0100930500.01.T02 | Ferredoxin--nitrite reductase chloroplastic                                |
| maker-1-augustus-gene-146.39-mRNA-1 | Japonica | Indica   |           | Os02g0765800 | OsR498G0100930700.01.T02 | SCP2 sterol-binding domain                                                 |
| maker-1-augustus-gene-146.53-mRNA-1 | Japonica | Indica   |           | Os02g0765600 | OsR498G0100931500.01.T01 | 1,4-alpha-D-glucan glucanohydrolase                                        |
| maker-1-augustus-gene-146.54-mRNA-1 | Japonica | NA       |           | Os01g0357400 | OsR498G0100931500.01.T01 | Alpha-amylase 2 (Fragment)                                                 |
| maker-1-augustus-gene-146.60-mRNA-1 | Japonica | NA       |           | Os01g0358400 | OsR498G0100935300.01.T01 | S4 RNA-binding domain-containing protein (Fragment)                        |
| maker-1-augustus-gene-146.63-mRNA-1 | Japonica | NA       |           | Os01g0358300 | OsR498G0100935200.01.T02 | Putative tetratricopeptide-like helical domain, protein LOW PSII ACCUMULA  |
| maker-1-augustus-gene-147.35-mRNA-1 | Japonica | NA       | CC-NBS-TM |              | OsR498G0100940800.01.T01 | Powdery mildew resistance protein PM3 variant                              |
| maker-1-augustus-gene-148.26-mRNA-1 | Japonica | Indica   | NBS-TM    | Os01g0359800 | OsR498G0100942600.01.T01 | Powdery mildew resistance protein PM3 variant                              |
| maker-1-augustus-gene-148.29-mRNA-1 | Japonica | NA       |           | Os01g0360200 | OsR498G0100943000.01.T04 | Respiratory burst oxidase B                                                |
| maker-1-augustus-gene-148.34-mRNA-1 | Japonica | NA       |           | Os01g0360600 | OsR498G0100944800.01.T01 | Dephospho-CoA kinase                                                       |
| maker-1-augustus-gene-148.37-mRNA-1 | Japonica | NA       |           |              | OsR498G0408211800.01.T01 |                                                                            |
| maker-1-augustus-gene-149.40-mRNA-1 | Japonica | NA       |           |              | OsR498G0100949500.01.T02 | rRNA adenine N(6)-methyltransferase                                        |
| maker-1-augustus-gene-149.44-mRNA-1 | Japonica | NA       |           | Os01g0363300 | OsR498G0100952300.01.T01 |                                                                            |
| maker-1-augustus-gene-149.47-mRNA-1 | Japonica | NA       |           | Os01g0361500 | OsR498G0100948400.01.T04 | Acyltransferase                                                            |
| maker-1-augustus-gene-149.54-mRNA-1 | Japonica | NA       |           |              | OsR498G0100949000.01.T02 | Acyltransferase-like protein chloroplastic                                 |
| maker-1-augustus-gene-150.31-mRNA-1 | Japonica | Indica   |           | Os01g0363900 | OsR498G0100952700.01.T02 | Xpo1 domain-containing protein                                             |
| maker-1-augustus-gene-150.40-mRNA-1 | Japonica | NA       | Kinase-TM | Os01g0364800 | OsR498G0100956900.01.T01 | Wall-associated receptor kinase                                            |
| maker-1-augustus-gene-151.1-mRNA-1  | Japonica | NA       |           |              | OsR498G0100957900.01.T01 | Neprosin domain-containing protein (Fragment)                              |

|                                     |          |          |  |              |                          |                                                                  |
|-------------------------------------|----------|----------|--|--------------|--------------------------|------------------------------------------------------------------|
| maker-1-augustus-gene-151.2-mRNA-1  | Japonica | NA       |  |              | OsR498G0100958900.01.T02 |                                                                  |
| maker-1-augustus-gene-151.6-mRNA-1  | Japonica | NA       |  | Os01g0367100 | OsR498G0100959800.01.T07 | NAD(P)-binding Rossmann-fold superfamily protein                 |
| maker-1-augustus-gene-152.40-mRNA-1 | Japonica | Japonica |  | Os01g0368000 | OsR498G0100964300.01.T01 | Flavin-containing monooxygenase                                  |
| maker-1-augustus-gene-152.42-mRNA-1 | Japonica | NA       |  |              |                          | RRM domain-containing protein                                    |
| maker-1-augustus-gene-152.44-mRNA-1 | Japonica | NA       |  | Os01g0367300 | OsR498G0100960200.01.T07 | RRM domain-containing protein                                    |
| maker-1-augustus-gene-152.46-mRNA-1 | Japonica | Indica   |  | Os01g0367400 | OsR498G0100961200.01.T04 | NAD(P)-binding Rossmann-fold superfamily protein                 |
| maker-1-augustus-gene-152.52-mRNA-1 | Japonica | NA       |  | Os01g0367900 | OsR498G0100964000.01.T02 | Chromatin-remodeling complex ATPase chain                        |
| maker-1-augustus-gene-153.34-mRNA-1 | Japonica | NA       |  | Os01g0369200 | OsR498G0100968500.01.T01 | Cullin-1                                                         |
| maker-1-augustus-gene-153.36-mRNA-1 | Japonica | NA       |  | Os01g0369000 | OsR498G0100968000.01.T03 | Cullin-1                                                         |
| maker-1-augustus-gene-153.41-mRNA-1 | Japonica | NA       |  |              | OsR498G0100968800.01.T01 | Potassium transporter                                            |
| maker-1-augustus-gene-153.43-mRNA-1 | Japonica | NA       |  | Os01g0369700 | OsR498G0100969800.01.T01 | Glutathione S-transferase IV                                     |
| maker-1-augustus-gene-153.45-mRNA-1 | Japonica | Indica   |  | Os01g0369900 | OsR498G0100970600.01.T01 | 12-oxo-phytodienoic acid reductase                               |
| maker-1-augustus-gene-153.48-mRNA-1 | Japonica | NA       |  |              | OsR498G0100971200.01.T01 | N-ethylmaleimide reductase                                       |
| maker-1-augustus-gene-154.28-mRNA-1 | Japonica | NA       |  | Os01g0371400 |                          | Glutathione transferase                                          |
| maker-1-augustus-gene-154.30-mRNA-1 | Japonica | NA       |  | Os01g0371500 | OsR498G0100975500.01.T01 | Glutathione transferase                                          |
| maker-1-augustus-gene-154.32-mRNA-1 | Japonica | Japonica |  | Os01g0370200 | OsR498G0100971400.01.T01 | Glutathione transferase                                          |
| maker-1-augustus-gene-154.35-mRNA-1 | Japonica | Indica   |  | Os01g0371200 | OsR498G0100972400.01.T01 | Glutathione transferase                                          |
| maker-1-augustus-gene-154.38-mRNA-1 | Japonica | NA       |  | Os01g0371200 | OsR498G0100974400.01.T01 | Glutathione transferase                                          |
| maker-1-augustus-gene-155.0-mRNA-1  | Japonica | NA       |  |              |                          | Glutathione transferase                                          |
| maker-1-augustus-gene-155.2-mRNA-1  | Japonica | NA       |  | Os01g0372400 | OsR498G0100978100.01.T01 | Glutathione transferase                                          |
| maker-1-augustus-gene-155.4-mRNA-1  | Japonica | NA       |  | Os01g0372700 | OsR498G0100979000.01.T01 | Asparagine--tRNA ligase                                          |
| maker-1-augustus-gene-155.7-mRNA-1  | Japonica | NA       |  | Os06g0247200 | OsR498G0408464800.01.T01 | Fe2OG dioxygenase domain-containing protein                      |
| maker-1-augustus-gene-156.0-mRNA-1  | Japonica | NA       |  | Os01g0374000 | OsR498G0100980700.01.T01 | Glutathione transferase                                          |
| maker-1-augustus-gene-156.12-mRNA-1 | Japonica | NA       |  | Os01g0375000 | OsR498G0100984800.01.T01 | Guanine nucleotide-binding protein-like 3                        |
| maker-1-augustus-gene-156.2-mRNA-1  | Japonica | Indica   |  | Os01g0374600 | OsR498G0100983700.01.T01 | Laccase                                                          |
| maker-1-augustus-gene-156.5-mRNA-1  | Japonica | NA       |  | Os01g0374900 | OsR498G0100984500.01.T01 | Putative E3 ubiquitin-protein ligase LUL2                        |
| maker-1-augustus-gene-156.7-mRNA-1  | Japonica | Japonica |  | Os01g0375200 | OsR498G0100985300.01.T01 | Shikimate biosynthesis protein aroDE                             |
| maker-1-augustus-gene-157.0-mRNA-1  | Japonica | Indica   |  | Os01g0375200 | OsR498G0100985700.01.T01 | Shikimate biosynthesis protein aroDE                             |
| maker-1-augustus-gene-157.4-mRNA-1  | Japonica | NA       |  | Os01g0376700 | OsR498G0100989200.01.T02 | Sucrose-phosphate phosphatase                                    |
| maker-1-augustus-gene-158.0-mRNA-1  | Japonica | NA       |  | Os01g0377700 | OsR498G0100990900.01.T01 | Nuclear pore localization protein Npl                            |
| maker-1-augustus-gene-158.2-mRNA-1  | Japonica | NA       |  | Os01g0377500 | OsR498G0100990800.01.T01 | CYCLIN domain-containing protein                                 |
| maker-1-augustus-gene-158.5-mRNA-1  | Japonica | Indica   |  | Os12g0530100 | OsR498G0100992000.01.T01 | Peroxidase                                                       |
| maker-1-augustus-gene-160.28-mRNA-1 | Japonica | NA       |  | Os01g0722550 |                          | HAT dimerization domain-containing protein / transposase-related |
| maker-1-augustus-gene-161.34-mRNA-1 | Japonica | NA       |  | Os01g0382200 | OsR498G0100996400.01.T01 | Putative hydroxyanthranilate hydroxycinnamoyltransferase 2       |
| maker-1-augustus-gene-161.36-mRNA-1 | Japonica | NA       |  | Os01g0382700 | OsR498G0101000100.01.T02 | Stress regulated protein isoform 3                               |
| maker-1-augustus-gene-161.41-mRNA-1 | Japonica | NA       |  | Os05g0267732 | OsR498G0510209200.01.T01 |                                                                  |
| maker-1-augustus-gene-161.45-mRNA-1 | Japonica | NA       |  |              |                          |                                                                  |
| maker-1-augustus-gene-162.0-mRNA-1  | Japonica | Indica   |  | Os05g0144100 | OsR498G0101004100.01.T01 | Transducin family protein / WD-40 repeat family protein          |
| maker-1-augustus-gene-162.10-mRNA-1 | Japonica | NA       |  |              | OsR498G0101003000.01.T01 |                                                                  |
| maker-1-augustus-gene-162.26-mRNA-1 | Japonica | NA       |  | Os01g0385000 | OsR498G0101009400.01.T01 |                                                                  |
| maker-1-augustus-gene-163.28-mRNA-1 | Japonica | NA       |  | Os01g0385400 | OsR498G0101010400.01.T02 | S-type anion channel SLAH3                                       |
| maker-1-augustus-gene-163.31-mRNA-1 | Japonica | Indica   |  | Os01g0385600 | OsR498G0101011200.01.T01 | Ribosomal protein-like                                           |
| maker-1-augustus-gene-165.11-mRNA-1 | Japonica | Indica   |  | Os02g0204700 | OsR498G0101021000.01.T02 |                                                                  |
| maker-1-augustus-gene-165.5-mRNA-1  | Japonica | NA       |  |              |                          | Piezo-type mechanosensitive ion channel like                     |
| maker-1-augustus-gene-166.38-mRNA-1 | Japonica | NA       |  |              | OsR498G0101029700.01.T05 | tRNA (guanine(37)-N1)-methyltransferase                          |
| maker-1-augustus-gene-166.39-mRNA-1 | Japonica | NA       |  |              | OsR498G0101029700.01.T01 | tRNA (guanine(37)-N1)-methyltransferase                          |
| maker-1-augustus-gene-166.43-mRNA-1 | Japonica | NA       |  |              | OsR498G0101029600.01.T03 |                                                                  |
| maker-1-augustus-gene-167.0-mRNA-1  | Japonica | NA       |  | Os01g0390900 | OsR498G0101031000.01.T01 | Dual specificity phosphatase                                     |
| maker-1-augustus-gene-168.40-mRNA-1 | Japonica | NA       |  | Os01g0392100 | OsR498G0101039100.01.T02 |                                                                  |
| maker-1-augustus-gene-169.0-mRNA-1  | Japonica | NA       |  |              | OsR498G0101041900.01.T02 |                                                                  |
| maker-1-augustus-gene-169.11-mRNA-1 | Japonica | NA       |  | Os01g0393100 | OsR498G0101043400.01.T01 | NAC domain class transcription factor                            |
| maker-1-augustus-gene-169.14-mRNA-1 | Japonica | NA       |  | Os04g0495900 | OsR498G0408827700.01.T01 | Glycerol-3-phosphatase 1                                         |
| maker-1-augustus-gene-169.2-mRNA-1  | Japonica | Indica   |  | Os01g0104600 | OsR498G0101041900.01.T05 | Light-mediated development protein DET1                          |
| maker-1-augustus-gene-169.4-mRNA-1  | Japonica | NA       |  |              |                          | Transposon protein, putative, CACTA, En/Spm sub-class            |
| maker-1-augustus-gene-169.9-mRNA-1  | Japonica | Japonica |  | Os01g0393400 | OsR498G0101043700.01.T03 | ABC transporter B family member 4                                |
| maker-1-augustus-gene-177.36-mRNA-1 | Japonica | NA       |  | Os01g0495900 | OsR498G0101046700.01.T01 | RNA-binding                                                      |
| maker-1-augustus-gene-177.42-mRNA-1 | Japonica | NA       |  | Os01g0496900 | OsR498G0101049400.01.T01 | Sterol O-acyltransferase                                         |
| maker-1-augustus-gene-178.0-mRNA-1  | Japonica | NA       |  |              | OsR498G0101051700.01.T01 | Expressed protein (Fragment)                                     |
| maker-1-augustus-gene-178.6-mRNA-1  | Japonica | NA       |  |              | OsR498G0101050600.01.T01 | Putative calcium-binding protein annexin 6                       |
| maker-1-augustus-gene-179.25-mRNA-1 | Japonica | NA       |  | Os01g0499300 | OsR498G0101054600.01.T01 | AMSH-like ubiquitin thioesterase 3                               |
| maker-1-augustus-gene-179.31-mRNA-1 | Japonica | Japonica |  | Os01g0499600 | OsR498G1119310800.01.T01 |                                                                  |

|                                     |          |          |               |              |                          |                                                                       |
|-------------------------------------|----------|----------|---------------|--------------|--------------------------|-----------------------------------------------------------------------|
| maker-1-augustus-gene-180.31-mRNA-1 | Japonica | NA       |               | Os01g0501800 | OsR498G0101060700.01.T01 | Oxygen-evolving enhancer protein like                                 |
| maker-1-augustus-gene-180.33-mRNA-1 | Japonica | NA       |               |              | OsR498G0101058200.01.T01 | DUF632 domain-containing protein                                      |
| maker-1-augustus-gene-180.35-mRNA-1 | Japonica | NA       |               |              |                          | Mediator of RNA polymerase II transcription subunit like              |
| maker-1-augustus-gene-180.38-mRNA-1 | Japonica | NA       |               | Os01g0501700 | OsR498G0101060600.01.T01 | Sec-independent protein translocase protein TATC chloroplastic        |
| maker-1-augustus-gene-181.0-mRNA-1  | Japonica | NA       |               |              | OsR498G0101063500.01.T01 | Acyl-[acyl-carrier-protein] hydrolase                                 |
| maker-1-augustus-gene-181.10-mRNA-1 | Japonica | NA       | NRAMP6        | Os01g0503400 | OsR498G0101068400.01.T03 | Metal transporter                                                     |
| maker-1-augustus-gene-181.2-mRNA-1  | Japonica | NA       |               | Os01g0502400 | OsR498G0101064300.01.T02 | Oxoglutarate/iron-dependent dioxygenase                               |
| maker-1-augustus-gene-181.8-mRNA-1  | Japonica | NA       |               | Os01g0502700 | OsR498G0101065300.01.T01 |                                                                       |
| maker-1-augustus-gene-182.32-mRNA-1 | Japonica | NA       |               |              | OsR498G0101074900.01.T01 | 2-hydroxyacyl-CoA lyase-like                                          |
| maker-1-augustus-gene-182.34-mRNA-1 | Japonica | NA       |               | Os01g0504500 | OsR498G0101071600.01.T03 | Protein DETOXIFICATION                                                |
| maker-1-augustus-gene-183.0-mRNA-1  | Japonica | NA       |               |              | OsR498G0101075900.01.T02 | Ribosome quality control complex subunit 2                            |
| maker-1-augustus-gene-183.3-mRNA-1  | Japonica | NA       |               | Os01g0506100 | OsR498G0101078100.01.T03 | Pentatricopeptide repeat-containing protein mitochondrial             |
| maker-1-augustus-gene-183.4-mRNA-1  | Japonica | NA       |               | Os01g0506200 | OsR498G0101079200.01.T04 | Tetratricopeptide repeat protein 5                                    |
| maker-1-augustus-gene-184.27-mRNA-1 | Japonica | NA       |               | Os01g0507700 | OsR498G0101084100.01.T03 | Farnesylated protein 2                                                |
| maker-1-augustus-gene-184.29-mRNA-1 | Japonica | NA       |               | Os01g0507900 | OsR498G0101084700.01.T02 | ATP-dependent Clp protease proteolytic subunit                        |
| maker-1-augustus-gene-184.34-mRNA-1 | Japonica | NA       |               | Os01g0508000 | OsR498G0101085300.01.T01 | Beta-glucosidase 44                                                   |
| maker-1-augustus-gene-185.37-mRNA-1 | Japonica | NA       |               |              | OsR498G0101090900.01.T01 |                                                                       |
| maker-1-augustus-gene-186.36-mRNA-1 | Japonica | Japonica |               | Os01g0509900 | OsR498G0101094500.01.T01 | BED-type domain-containing protein                                    |
| maker-1-augustus-gene-186.38-mRNA-1 | Japonica | NA       | Kinase        |              |                          | MAPKK                                                                 |
| maker-1-augustus-gene-186.42-mRNA-1 | Japonica | NA       |               |              | OsR498G0101097500.01.T01 | Protein ENHANCED DOWNY MILDEW 2                                       |
| maker-1-augustus-gene-186.49-mRNA-1 | Japonica | NA       |               |              | OsR498G0101098100.01.T01 |                                                                       |
| maker-1-augustus-gene-186.51-mRNA-1 | Japonica | NA       |               | Os01g0510600 | OsR498G0101097800.01.T01 | Protein FLUORESCENT IN BLUE LIGHT, chloroplastic                      |
| maker-1-augustus-gene-187.33-mRNA-1 | Japonica | NA       |               | Os01g0512100 | OsR498G0101105500.01.T01 | J domain-containing protein (Fragment)                                |
| maker-1-augustus-gene-187.39-mRNA-1 | Japonica | NA       |               |              |                          | TAF domain-containing protein (Fragment)                              |
| maker-1-augustus-gene-187.45-mRNA-1 | Japonica | NA       |               | Os01g0511100 | OsR498G0101102400.01.T01 | Usp domain-containing protein                                         |
| maker-1-augustus-gene-187.48-mRNA-1 | Japonica | NA       |               | Os01g0511300 | OsR498G0101102800.01.T01 | 26S proteasome non-ATPase regulatory subunit B                        |
| maker-1-augustus-gene-187.53-mRNA-1 | Japonica | Indica   |               | Os01g0511600 | OsR498G0101103600.01.T02 | Plastidal glycolate/glycerate translocator 1 chloroplastic            |
| maker-1-augustus-gene-188.26-mRNA-1 | Japonica | NA       |               | Os01g0513400 | OsR498G0101110500.01.T01 |                                                                       |
| maker-1-augustus-gene-188.29-mRNA-1 | Japonica | NA       |               | Os01g0513900 | OsR498G0101111700.01.T03 | Kinesin-like protein KIN-7A                                           |
| maker-1-augustus-gene-188.34-mRNA-1 | Japonica | NA       |               |              | OsR498G0101108400.01.T01 | PPM-type phosphatase domain-containing protein (Fragment)             |
| maker-1-augustus-gene-188.39-mRNA-1 | Japonica | NA       |               |              | OsR498G0101109600.01.T01 | Nicotinamide adenine dinucleotide transporter like                    |
| maker-1-augustus-gene-188.46-mRNA-1 | Japonica | NA       |               | Os01g0513700 | OsR498G0101111200.01.T01 | Trafficking protein particle complex subunit                          |
| maker-1-augustus-gene-188.49-mRNA-1 | Japonica | NA       |               | Os01g0513800 | OsR498G0101111400.01.T01 | Brix domain-containing protein 1                                      |
| maker-1-augustus-gene-189.11-mRNA-1 | Japonica | NA       | Kinase-LRR-TM | Os01g0514700 | OsR498G0101114500.01.T01 | Receptor protein kinase-like protein ZAR1                             |
| maker-1-augustus-gene-189.13-mRNA-1 | Japonica | NA       | Kinase-LRR-TM |              |                          | Protein kinase domain-containing protein                              |
| maker-1-augustus-gene-189.18-mRNA-1 | Japonica | NA       |               | Os08g0381000 | OsR498G0407574900.01.T01 | Cell wall protein-like                                                |
| maker-1-augustus-gene-189.5-mRNA-1  | Japonica | NA       |               | Os01g0514600 | OsR498G0101113500.01.T01 | Fimbrin-2                                                             |
| maker-1-augustus-gene-190.0-mRNA-1  | Japonica | NA       |               | Os01g0516400 | OsR498G0101116900.01.T01 | Stress responsive alpha-beta barrel                                   |
| maker-1-augustus-gene-190.18-mRNA-1 | Japonica | NA       |               |              | OsR498G0101119400.01.T01 | F-box domain-containing protein                                       |
| maker-1-augustus-gene-190.20-mRNA-1 | Japonica | NA       |               | Os01g0517500 | OsR498G0101120600.01.T01 | Exopolygalacturonase                                                  |
| maker-1-augustus-gene-190.4-mRNA-1  | Japonica | NA       |               | Os01g0516600 | OsR498G0101117500.01.T01 | Stress responsive alpha-beta barrel                                   |
| maker-1-augustus-gene-190.6-mRNA-1  | Japonica | Indica   |               | Os01g0516700 | OsR498G0101118000.01.T03 | UDP-N-acetylglucosamine--N-acetylmuramyl- (Pentapeptide) pyrophosphor |
| maker-1-augustus-gene-190.7-mRNA-1  | Japonica | NA       |               |              |                          | Plant PDR ABC transporter associated                                  |
| maker-1-augustus-gene-191.10-mRNA-1 | Japonica | NA       |               |              |                          |                                                                       |
| maker-1-augustus-gene-191.2-mRNA-1  | Japonica | Japonica |               | Os01g0517800 | OsR498G0101120800.01.T01 | PLATZ transcription factor (Fragment)                                 |
| maker-1-augustus-gene-192.30-mRNA-1 | Japonica | NA       |               |              |                          |                                                                       |
| maker-1-augustus-gene-192.32-mRNA-1 | Japonica | NA       | CC-NBS-TM     |              | OsR498G0101131600.01.T02 | Blight resistance protein RGA1-like protein                           |
| maker-1-augustus-gene-193.0-mRNA-1  | Japonica | Indica   |               | Os01g0521400 | OsR498G0101133900.01.T01 | Gastric triacylglycerol lipase                                        |
| maker-1-augustus-gene-193.10-mRNA-1 | Japonica | Japonica |               | Os01g0522433 | OsR498G0101136300.01.T01 |                                                                       |
| maker-1-augustus-gene-193.3-mRNA-1  | Japonica | NA       |               | Os01g0521500 | OsR498G0101134300.01.T01 | J domain-containing protein (Fragment)                                |
| maker-1-augustus-gene-193.9-mRNA-1  | Japonica | NA       |               | Os01g0522100 | OsR498G0101136300.01.T01 | VQ domain-containing protein                                          |
| maker-1-augustus-gene-194.0-mRNA-1  | Japonica | NA       |               |              |                          | Protein kinase domain-containing protein                              |
| maker-1-augustus-gene-194.2-mRNA-1  | Japonica | NA       |               | Os11g0205200 | OsR498G0407482700.01.T01 |                                                                       |
| maker-1-augustus-gene-194.6-mRNA-1  | Japonica | Indica   |               | Os01g0524500 | OsR498G0101142900.01.T01 | Transcription factor MYB51                                            |
| maker-1-augustus-gene-194.8-mRNA-1  | Japonica | NA       |               |              |                          | Callose synthase 5                                                    |
| maker-1-augustus-gene-195.0-mRNA-1  | Japonica | NA       |               | Os01g0524700 | OsR498G0101143700.01.T02 | ARM repeat superfamily protein isoform 1                              |
| maker-1-augustus-gene-195.4-mRNA-1  | Japonica | NA       |               |              | OsR498G0101148900.01.T01 | DNA-damage-repair/toleration protein, chloroplastic                   |
| maker-1-augustus-gene-195.6-mRNA-1  | Japonica | NA       |               | Os01g0526200 | OsR498G0101149100.01.T01 | rRNA processing protein-related                                       |
| maker-1-augustus-gene-196.2-mRNA-1  | Japonica | Japonica |               | Os01g0527400 | OsR498G0101154900.01.T04 | Bromo adjacent homology (BAH) domain                                  |
| maker-1-augustus-gene-196.7-mRNA-1  | Japonica | NA       |               |              | OsR498G0101155200.01.T01 | RNA-dependent RNA polymerase                                          |
| maker-1-augustus-gene-197.0-mRNA-1  | Japonica | NA       |               |              |                          | Tau95 domain-containing protein                                       |

|                                     |          |          |           |              |                           |                                                            |
|-------------------------------------|----------|----------|-----------|--------------|---------------------------|------------------------------------------------------------|
| maker-1-augustus-gene-197.12-mRNA-1 | Japonica | NA       |           |              |                           | GRF-type domain-containing protein                         |
| maker-1-augustus-gene-197.14-mRNA-1 | Japonica | NA       |           | Os01g0527700 | OsR498G0101155400.01.T01  | Heme O synthase                                            |
| maker-1-augustus-gene-197.18-mRNA-1 | Japonica | Indica   |           | Os06g0521000 | OsR498G0101155600.01.T01  | Transposon protein, putative, ping/pong/SNOOPY sub-class   |
| maker-1-augustus-gene-197.5-mRNA-1  | Japonica | NA       |           |              |                           | Arogenate dehydratase                                      |
| maker-1-augustus-gene-197.7-mRNA-1  | Japonica | NA       |           | Os01g0528800 | OsR498G0101158700.01.T01  | Cinnamoyl CoA reductase-like 2a                            |
| maker-1-augustus-gene-198.37-mRNA-1 | Japonica | Indica   |           | Os01g0530300 | OsR498G0101163100.01.T01  | SANTA domain-containing protein                            |
| maker-1-augustus-gene-198.42-mRNA-1 | Japonica | NA       |           |              | OsR498G0101163300.01.T01  | RNA polymerase archaeal subunit P/eukaryotic subunit RPABC |
| maker-1-augustus-gene-198.48-mRNA-1 | Japonica | NA       |           | Os01g0531500 | OsR498G0101166100.01.T01  | DLH domain-containing protein (Fragment)                   |
| maker-1-augustus-gene-198.52-mRNA-1 | Japonica | NA       |           | Os01g0541600 | OsR498G0101165600.01.T01  | BAH domain-containing protein                              |
| maker-1-augustus-gene-198.55-mRNA-1 | Japonica | NA       |           | Os01g0531200 | OsR498G01011960700.01.T03 | PMD domain-containing protein                              |
| maker-1-augustus-gene-198.57-mRNA-1 | Japonica | NA       |           |              |                           | Katanin p80 WD40 repeat-containing subunit B1 homolog      |
| maker-1-augustus-gene-198.60-mRNA-1 | Japonica | NA       |           | Os01g0756600 | OsR498G0102017700.01.T01  | Putative Galactose-binding domain-containing protein       |
| maker-1-augustus-gene-199.0-mRNA-1  | Japonica | Japonica |           | Os01g0532600 | OsR498G0613256400.01.T02  | Probable cation transporter HKT9                           |
| maker-1-augustus-gene-199.13-mRNA-1 | Japonica | NA       |           |              |                           |                                                            |
| maker-1-augustus-gene-199.6-mRNA-1  | Japonica | NA       |           |              | OsR498G0101168800.01.T02  | Pre-mRNA-processing protein 40A                            |
| maker-1-augustus-gene-2.0-mRNA-1    | Japonica | Indica   |           | Os01g0101700 | OsR498G0100006700.01.T02  | J domain-containing protein (Fragment)                     |
| maker-1-augustus-gene-2.14-mRNA-1   | Japonica | NA       |           | Os01g0102700 | OsR498G0100011900.01.T01  | Translocon-associated protein subunit beta                 |
| maker-1-augustus-gene-2.17-mRNA-1   | Japonica | NA       |           | Os01g0102800 | OsR498G0100012100.01.T01  | Protein CHROMATIN REMODELING like                          |
| maker-1-augustus-gene-2.19-mRNA-1   | Japonica | NA       |           | Os01g0102900 | OsR498G0100012800.01.T01  | Light regulated Lir                                        |
| maker-1-augustus-gene-2.2-mRNA-1    | Japonica | NA       |           | Os01g0101800 | OsR498G0100006900.01.T01  | Putative aldehyde dehydrogenase family protein             |
| maker-1-augustus-gene-2.22-mRNA-1   | Japonica | NA       |           | Os01g0102950 | OsR498G0100013000.01.T02  | Vacuolar protein sorting-associated protein 60.2           |
| maker-1-augustus-gene-2.26-mRNA-1   | Japonica | NA       |           | Os01g0103600 | OsR498G0100014200.01.T01  | 3-beta-hydroxysteroid-delta-isomerase                      |
| maker-1-augustus-gene-2.27-mRNA-1   | Japonica | NA       |           | Os01g0103600 | OsR498G0100014200.01.T03  | EXPERA domain-containing protein (Fragment)                |
| maker-1-augustus-gene-2.4-mRNA-1    | Japonica | NA       |           | Os01g0102300 | OsR498G0100010900.01.T01  | Thylakoid luminal 17.9 kDa protein, chloroplastic          |
| maker-1-augustus-gene-2.6-mRNA-1    | Japonica | NA       |           | Os01g0102500 | OsR498G0100011500.01.T01  | Gap junction beta-4 protein isoform 1                      |
| maker-1-augustus-gene-2.9-mRNA-1    | Japonica | NA       |           | Os01g0102600 | OsR498G0100011700.01.T01  | Shikimate kinase, chloroplastic                            |
| maker-1-augustus-gene-200.26-mRNA-1 | Japonica | Indica   |           | Os01g0533900 | OsR498G0101176700.01.T02  | ABC transporter B family member 9                          |
| maker-1-augustus-gene-200.32-mRNA-1 | Japonica | NA       |           |              |                           | 1,3-beta-glucan synthase                                   |
| maker-1-augustus-gene-200.39-mRNA-1 | Japonica | NA       |           | Os01g0533400 | OsR498G0101174400.01.T01  | Beta-galactosidase 13                                      |
| maker-1-augustus-gene-200.41-mRNA-1 | Japonica | NA       |           | Os01g0533500 | OsR498G0101174800.01.T01  | 1,3-beta-glucan synthase                                   |
| maker-1-augustus-gene-200.44-mRNA-1 | Japonica | NA       |           |              |                           | Beta-galactosidase                                         |
| maker-1-augustus-gene-218.51-mRNA-1 | Japonica | NA       |           | Os01g0559000 | OsR498G0101334100.01.T01  | PITH domain-containing protein 1                           |
| maker-1-augustus-gene-219.11-mRNA-1 | Japonica | NA       |           | Os01g0559300 | OsR498G0101335100.01.T01  | Histone-lysine N-methyltransferase EHMT2                   |
| maker-1-augustus-gene-219.14-mRNA-1 | Japonica | Japonica |           | Os01g0559500 | OsR498G0101336300.01.T05  | Pentatricopeptide repeat-containing protein chloroplastic  |
| maker-1-augustus-gene-219.18-mRNA-1 | Japonica | NA       |           | Os01g0559600 | OsR498G0101337500.01.T01  | Vacuolar-processing enzyme                                 |
| maker-1-augustus-gene-219.22-mRNA-1 | Japonica | NA       |           | Os01g0560000 | OsR498G0101339800.01.T01  | IAA-amino acid hydrolase                                   |
| maker-1-augustus-gene-219.7-mRNA-1  | Japonica | NA       |           | Os01g0559200 | OsR498G0101334900.01.T01  | Phosphorylated adapter RNA export protein (Fragment)       |
| maker-1-augustus-gene-220.11-mRNA-1 | Japonica | NA       |           |              |                           |                                                            |
| maker-1-augustus-gene-220.3-mRNA-1  | Japonica | NA       |           | Os01g0560350 |                           | V-SNARE domain-containing protein (Fragment)               |
| maker-1-augustus-gene-220.5-mRNA-1  | Japonica | NA       |           |              |                           | Peptidylprolyl isomerase                                   |
| maker-1-augustus-gene-221.30-mRNA-1 | Japonica | Japonica |           | Os01g0562400 | OsR498G0101342100.01.T02  | Peptidylprolyl isomerase                                   |
| maker-1-augustus-gene-221.35-mRNA-1 | Japonica | Japonica |           | Os01g0563000 | OsR498G0101346000.01.T04  | Peptidylprolyl isomerase                                   |
| maker-1-augustus-gene-222.1-mRNA-1  | Japonica | NA       |           | Os01g0564300 |                           | Peptidylprolyl isomerase                                   |
| maker-1-augustus-gene-223.34-mRNA-1 | Japonica | NA       |           | Os01g0565600 | OsR498G0101352200.01.T02  | Ribonuclease MRP protein subunit SNM1                      |
| maker-1-augustus-gene-223.37-mRNA-1 | Japonica | NA       |           | Os01g0565800 | OsR498G0101352600.01.T01  | DUF538 domain-containing protein                           |
| maker-1-augustus-gene-223.39-mRNA-1 | Japonica | Indica   |           | Os01g0566100 | OsR498G0101353600.01.T04  | Early flowering protein 3                                  |
| maker-1-augustus-gene-223.42-mRNA-1 | Japonica | NA       |           | Os01g0566500 | OsR498G0101357200.01.T02  | Carotenoid cleavage dioxygenase                            |
| maker-1-augustus-gene-224.0-mRNA-1  | Japonica | NA       |           | Os01g0567500 | OsR498G0101359700.01.T01  | Sugar carrier protein C                                    |
| maker-1-augustus-gene-224.2-mRNA-1  | Japonica | NA       |           | Os01g0566900 | OsR498G0101369200.01.T04  | PiRNA biogenesis protein EXD1                              |
| maker-1-augustus-gene-224.8-mRNA-1  | Japonica | NA       |           | Os01g0567600 | OsR498G0101360200.01.T01  | Sugar carrier protein C                                    |
| maker-1-augustus-gene-225.1-mRNA-1  | Japonica | NA       |           | Os01g0569200 |                           |                                                            |
| maker-1-augustus-gene-225.2-mRNA-1  | Japonica | NA       |           | Os01g0568400 |                           | Cysteine-rich receptor-like protein kinase 25              |
| maker-1-augustus-gene-225.4-mRNA-1  | Japonica | NA       | Kinase-TM | Os01g0568400 |                           | receptor-like kinase TMK3                                  |
| maker-1-augustus-gene-226.0-mRNA-1  | Japonica | NA       |           | Os01g0570500 | OsR498G0101367300.01.T01  | Casein kinase I                                            |
| maker-1-augustus-gene-226.13-mRNA-1 | Japonica | NA       |           | Os01g0571200 | OsR498G0101370700.01.T01  | 54S ribosomal protein L34, mitochondrial                   |
| maker-1-augustus-gene-226.17-mRNA-1 | Japonica | NA       |           | Os01g0571300 | OsR498G0101370900.01.T01  | Heat stress transcription factor A-2                       |
| maker-1-augustus-gene-226.19-mRNA-1 | Japonica | NA       |           |              | OsR498G0101372900.01.T02  | C3H-type transcription factor                              |
| maker-1-augustus-gene-226.23-mRNA-1 | Japonica | NA       |           | Os01g0570800 | OsR498G0101369200.01.T01  | IQ domain-containing protein IQM1                          |
| maker-1-augustus-gene-226.28-mRNA-1 | Japonica | Indica   |           | Os01g0571100 | OsR498G0101369800.01.T03  |                                                            |
| maker-1-augustus-gene-226.5-mRNA-1  | Japonica | NA       |           |              | OsR498G0101368900.01.T01  | Carbamoyl-phosphate synthase (glutamine-hydrolyzing)       |
| maker-1-augustus-gene-226.7-mRNA-1  | Japonica | Indica   |           | Os01g0571000 | OsR498G0101369500.01.T01  | Graves disease carrier                                     |

|                                     |          |          |               |              |                           |                                                                         |
|-------------------------------------|----------|----------|---------------|--------------|---------------------------|-------------------------------------------------------------------------|
| maker-1-augustus-gene-227.30-mRNA-1 | Japonica | NA       |               | Os01g0572300 |                           | Protein indeterminate-domain 9                                          |
| maker-1-augustus-gene-227.32-mRNA-1 | Japonica | NA       |               | Os05g0112000 | OsR498G01018864100.01.T01 | E3 ubiquitin-protein like                                               |
| maker-1-augustus-gene-227.34-mRNA-1 | Japonica | NA       |               |              | OsR498G0101376000.01.T03  | Calcium-binding EF hand family protein                                  |
| maker-1-augustus-gene-228.33-mRNA-1 | Japonica | NA       | NBS-TM        | Os01g0574400 | OsR498G0101378500.01.T03  | ATP-dependent zinc metalloprotease FTSH 4 mitochondrial                 |
| maker-1-augustus-gene-228.36-mRNA-1 | Japonica | NA       | NBS-TM        | Os01g0574500 | OsR498G0101378700.01.T01  | ATP-dependent zinc metalloprotease FTSH 4 mitochondrial                 |
| maker-1-augustus-gene-228.39-mRNA-1 | Japonica | NA       |               | Os01g0575000 | OsR498G0101381500.01.T01  | Protein ROOT HAIR DEFECTIVE 3 homolog                                   |
| maker-1-augustus-gene-228.46-mRNA-1 | Japonica | Indica   |               | Os01g0575200 | OsR498G0101382500.01.T01  | BHLH domain-containing protein                                          |
| maker-1-augustus-gene-228.47-mRNA-1 | Japonica | NA       |               | Os01g0575200 | OsR498G0101382500.01.T01  | BHLH transcription factor                                               |
| maker-1-augustus-gene-228.52-mRNA-1 | Japonica | NA       |               | Os01g0574600 | OsR498G0101379000.01.T01  | Glyoxylate/succinic semialdehyde reductase                              |
| maker-1-augustus-gene-229.29-mRNA-1 | Japonica | Indica   |               | Os04g0557200 | OsR498G0101393500.01.T01  | Anthocyanin regulatory R-S protein-like                                 |
| maker-1-augustus-gene-229.30-mRNA-1 | Japonica | NA       |               | Os01g0576100 | OsR498G0101387300.01.T01  | Anthocyanin regulatory R-S protein-like                                 |
| maker-1-augustus-gene-229.43-mRNA-1 | Japonica | NA       |               |              |                           |                                                                         |
| maker-1-augustus-gene-230.10-mRNA-1 | Japonica | NA       | Kinase-LRR-TM | Os01g0577600 | OsR498G0101394600.01.T01  | Leucine-rich repeat receptor protein kinase EXS                         |
| maker-1-augustus-gene-230.13-mRNA-1 | Japonica | NA       |               | Os01g0578000 | OsR498G0101395400.01.T01  | Recombination protein51 gene c                                          |
| maker-1-augustus-gene-230.18-mRNA-1 | Japonica | Indica   |               | Os03g0300200 | OsR498G0101395800.01.T03  | Programmed cell death protein 2                                         |
| maker-1-augustus-gene-230.8-mRNA-1  | Japonica | NA       |               | Os01g0578500 |                           | FBD domain-containing protein                                           |
| maker-1-augustus-gene-231.15-mRNA-1 | Japonica | Japonica |               | Os01g0580100 | OsR498G0101400300.01.T03  | Mannosyltransferase                                                     |
| maker-1-augustus-gene-231.21-mRNA-1 | Japonica | NA       |               | Os01g0580200 | OsR498G0101400900.01.T02  | Beta-galactosidase                                                      |
| maker-1-augustus-gene-231.28-mRNA-1 | Japonica | NA       |               | Os01g0579900 | OsR498G0101400000.01.T01  | Alpha/beta-Hydrolases superfamily protein                               |
| maker-1-augustus-gene-231.33-mRNA-1 | Japonica | NA       |               | Os01g0580000 | OsR498G0101400200.01.T02  | Alpha/beta-Hydrolases superfamily protein                               |
| maker-1-augustus-gene-231.6-mRNA-1  | Japonica | Indica   |               | Os01g0711500 | OsR498G0101399300.01.T01  | Calcineurin B-like protein 9                                            |
| maker-1-augustus-gene-232.0-mRNA-1  | Japonica | NA       |               | Os01g0580500 |                           | 1-aminocyclopropane-1-carboxylic acid oxidase                           |
| maker-1-augustus-gene-232.12-mRNA-1 | Japonica | NA       |               |              | OsR498G0101402200.01.T01  | Actin binding protein family                                            |
| maker-1-augustus-gene-232.13-mRNA-1 | Japonica | Indica   |               | Os01g0580800 | OsR498G0101402200.01.T01  | Alpha-mannosidase-like                                                  |
| maker-1-augustus-gene-232.18-mRNA-1 | Japonica | Japonica |               | Os01g0581800 | OsR498G0101404800.01.T01  | NB-ARC domain-containing protein                                        |
| maker-1-augustus-gene-232.2-mRNA-1  | Japonica | NA       |               | Os01g0581300 | OsR498G0101403500.01.T04  | Lycopene epsilon-cyclase                                                |
| maker-1-augustus-gene-232.7-mRNA-1  | Japonica | NA       | CC-Kinase-TM  | Os01g0581400 | OsR498G0101403700.01.T01  | Lycopene epsilon cyclase, chloroplastic                                 |
| maker-1-augustus-gene-232.9-mRNA-1  | Japonica | NA       |               | Os01g0580400 | OsR498G0101401800.01.T01  | Histone domain-containing protein                                       |
| maker-1-augustus-gene-233.29-mRNA-1 | Japonica | Indica   |               | Os05g0592800 | OsR498G0101409500.01.T01  | Protein-serine/threonine phosphatase                                    |
| maker-1-augustus-gene-233.37-mRNA-1 | Japonica | NA       |               | Os01g0582400 | OsR498G0101407000.01.T02  | Peptidyl-prolyl cis-trans isomerase                                     |
| maker-1-augustus-gene-233.42-mRNA-1 | Japonica | NA       |               | Os01g0583200 |                           | UBP1-associated proteins 1C isoform A                                   |
| maker-1-augustus-gene-234.49-mRNA-1 | Japonica | NA       |               | Os01g0585600 | OsR498G0101420100.01.T02  | DUF632 domain-containing protein                                        |
| maker-1-augustus-gene-235.35-mRNA-1 | Japonica | NA       |               | Os01g0586600 | OsR498G0101423200.01.T04  | 5'-AMP-activated protein kinase subunit gamma-3                         |
| maker-1-augustus-gene-235.38-mRNA-1 | Japonica | NA       |               |              | OsR498G0101423600.01.T01  | WRKY transcription factor                                               |
| maker-1-augustus-gene-235.40-mRNA-1 | Japonica | NA       |               | Os01g0587000 | OsR498G0101425200.01.T03  | V-type proton ATPase subunit                                            |
| maker-1-augustus-gene-236.0-mRNA-1  | Japonica | NA       |               | Os01g0588700 | OsR498G0101430700.01.T01  | YJU2 splicing factor homolog isoform X1                                 |
| maker-1-augustus-gene-236.13-mRNA-1 | Japonica | NA       |               | Os01g0588200 | OsR498G0101428400.01.T02  | Outer plastidial membrane protein porin                                 |
| maker-1-augustus-gene-236.17-mRNA-1 | Japonica | NA       |               | Os01g0588400 | OsR498G0101428600.01.T01  | Hypersensitive-induced response protein 1                               |
| maker-1-augustus-gene-236.19-mRNA-1 | Japonica | NA       | Kinase        | Os01g0588500 | OsR498G0101429400.01.T01  | Putative serine/threonine-protein kinase PIX7                           |
| maker-1-augustus-gene-236.22-mRNA-1 | Japonica | NA       |               | Os01g0588900 | OsR498G0101433200.01.T01  | Cytokinin riboside 5'-monophosphate phosphoribohydrolase LOG            |
| maker-1-augustus-gene-236.4-mRNA-1  | Japonica | NA       |               | Os01g0588800 | OsR498G0101432900.01.T06  | Type II protein arginine methyltransferase                              |
| maker-1-augustus-gene-236.9-mRNA-1  | Japonica | NA       | Kinase-TM     | Os01g0587400 | OsR498G0101426800.01.T01  | Receptor-like serine/threonine-protein kinase                           |
| maker-1-augustus-gene-237.0-mRNA-1  | Japonica | Japonica |               | Os01g0589100 | OsR498G0511248800.01.T01  | S-adenosyl-L-methionine-dependent methyltransferase superfamily protein |
| maker-1-augustus-gene-237.11-mRNA-1 | Japonica | NA       |               | Os01g0589000 | OsR498G0101435800.01.T03  | Ribosomal protein S1                                                    |
| maker-1-augustus-gene-237.12-mRNA-1 | Japonica | Japonica |               | Os01g0589500 | OsR498G0101437000.01.T01  | Holocarboxylase synthetase                                              |
| maker-1-augustus-gene-237.14-mRNA-1 | Japonica | NA       |               | Os01g0590200 | OsR498G0101439000.01.T01  |                                                                         |
| maker-1-augustus-gene-237.2-mRNA-1  | Japonica | NA       |               | Os01g0589200 |                           | Trans-aconitate 3-methyltransferase                                     |
| maker-1-augustus-gene-237.9-mRNA-1  | Japonica | NA       |               | Os01g0589800 | OsR498G0101437300.01.T01  | Photosystem II 22 kDa, chloroplastic                                    |
| maker-1-augustus-gene-238.39-mRNA-1 | Japonica | NA       |               |              | OsR498G0101442100.01.T02  | ATP-dependent zinc metalloprotease FtsH                                 |
| maker-1-augustus-gene-238.42-mRNA-1 | Japonica | NA       |               | Os01g0590900 | OsR498G0101443500.01.T01  | Serine/threonine-protein kinase AFC3                                    |
| maker-1-augustus-gene-238.48-mRNA-1 | Japonica | NA       |               | Os01g0591000 | OsR498G0101443900.01.T01  | Aldehyde dehydrogenase3                                                 |
| maker-1-augustus-gene-238.55-mRNA-1 | Japonica | NA       |               | Os01g0591300 | OsR498G0101445100.01.T02  | Aldehyd domain-containing protein (Fragment)                            |
| maker-1-augustus-gene-238.58-mRNA-1 | Japonica | NA       |               |              |                           | Bidirectional sugar transporter SWEET                                   |
| maker-1-augustus-gene-238.60-mRNA-1 | Japonica | Indica   |               | Os01g0590800 | OsR498G0101443000.01.T01  |                                                                         |
| maker-1-augustus-gene-238.63-mRNA-1 | Japonica | NA       |               | Os01g0590800 | OsR498G0101443400.01.T01  |                                                                         |
| maker-1-augustus-gene-239.28-mRNA-1 | Japonica | NA       |               | Os01g0593000 | OsR498G0101451500.01.T05  | Secretory carrier-associated membrane protein (Fragment)                |
| maker-1-augustus-gene-239.36-mRNA-1 | Japonica | NA       |               | Os01g0593200 | OsR498G0101453300.01.T05  | FLZ-type domain-containing protein                                      |
| maker-1-augustus-gene-239.40-mRNA-1 | Japonica | NA       |               | Os01g0593700 | OsR498G0101455700.01.T01  | Sulfate transporter                                                     |
| maker-1-augustus-gene-239.42-mRNA-1 | Japonica | NA       |               | Os01g0592900 | OsR498G0101450600.01.T01  | Regulator of telomere elongation helicase                               |
| maker-1-augustus-gene-239.47-mRNA-1 | Japonica | Japonica |               | Os01g0593100 | OsR498G0714656200.01.T02  | A-kinase anchor protein 17A                                             |
| maker-1-augustus-gene-239.49-mRNA-1 | Japonica | NA       |               | Os01g0593500 | OsR498G0101455200.01.T01  | Large subunit ribosomal protein L25                                     |

|                                     |          |          |           |              |                          |                                                                            |
|-------------------------------------|----------|----------|-----------|--------------|--------------------------|----------------------------------------------------------------------------|
| maker-1-augustus-gene-24.50-mRNA-1  | Japonica | NA       |           | Os01g0144200 | OsR498G0306795400.01.T03 | Glucose-induced degradation protein 4                                      |
| maker-1-augustus-gene-24.64-mRNA-1  | Japonica | NA       |           | Os01g0143300 | OsR498G0100159600.01.T01 | Mitochondrial glycoprotein family protein, putative isoform 1              |
| maker-1-augustus-gene-24.78-mRNA-1  | Japonica | NA       |           | Os01g0144100 | OsR498G0100162800.01.T01 | Thylakoid luminal protein 1, chloroplastic                                 |
| maker-1-augustus-gene-247.28-mRNA-1 | Japonica | NA       |           | Os01g0609066 | OsR498G0101514000.01.T02 | ABC transporter G family member 34                                         |
| maker-1-augustus-gene-25.13-mRNA-1  | Japonica | NA       |           |              | OsR498G0100172200.01.T02 | Putative E3 ubiquitin-protein ligase                                       |
| maker-1-augustus-gene-25.2-mRNA-1   | Japonica | NA       |           |              |                          | TFIIIS N-terminal domain-containing protein (Fragment)                     |
| maker-1-augustus-gene-25.6-mRNA-1   | Japonica | Indica   |           | Os11g0704800 | OsR498G0100171500.01.T01 | RHOMBOID-like protein (Fragment)                                           |
| maker-1-augustus-gene-256.64-mRNA-1 | Japonica | NA       |           |              | OsR498G0101575300.01.T01 | Kinesin-like protein KIN-13B                                               |
| maker-1-augustus-gene-257.52-mRNA-1 | Japonica | Japonica |           | Os01g0627933 | OsR498G0101582500.01.T01 | Secologanin synthase                                                       |
| maker-1-augustus-gene-257.53-mRNA-1 | Japonica | Japonica |           | Os01g0627966 | OsR498G0101582500.01.T01 | Cytochrome P450 monooxygenase                                              |
| maker-1-augustus-gene-257.60-mRNA-1 | Japonica | Indica   |           | Os01g0627900 | OsR498G0101583500.01.T01 | Secologanin synthase                                                       |
| maker-1-augustus-gene-258.10-mRNA-1 | Japonica | NA       | Kinase-TM | Os01g0629900 | OsR498G0101587800.01.T02 | Mitogen-activated protein kinase                                           |
| maker-1-augustus-gene-258.7-mRNA-1  | Japonica | NA       |           |              | OsR498G0101586100.01.T07 | FCP1 homology domain-containing protein                                    |
| maker-1-augustus-gene-259.1-mRNA-1  | Japonica | NA       |           | Os03g0855700 |                          | DUF223 domain-containing protein                                           |
| maker-1-augustus-gene-259.2-mRNA-1  | Japonica | Indica   |           | Os01g0630700 | OsR498G0101590100.01.T01 | AT hook motif-containing protein, putative, expressed                      |
| maker-1-augustus-gene-259.20-mRNA-1 | Japonica | NA       |           | Os01g0631100 | OsR498G0101592900.01.T01 | Protein REDUCED WALL ACETYLATION like                                      |
| maker-1-augustus-gene-259.26-mRNA-1 | Japonica | Indica   |           | Os01g0631200 | OsR498G0101593100.01.T03 | Uroporphyrin methylase 1                                                   |
| maker-1-augustus-gene-259.29-mRNA-1 | Japonica | Indica   |           | Os01g0631400 | OsR498G0101593500.01.T01 | Glycerol-3-phosphate 1-O-acyltransferase                                   |
| maker-1-augustus-gene-259.3-mRNA-1  | Japonica | Japonica |           | Os01g0630700 | OsR498G0102324800.01.T02 | DUF223 domain-containing protein                                           |
| maker-1-augustus-gene-259.31-mRNA-1 | Japonica | NA       |           | Os01g0631500 | OsR498G0101593900.01.T01 | Carbohydrate-binding X8 domain superfamily protein, putative               |
| maker-1-augustus-gene-259.33-mRNA-1 | Japonica | NA       | Kinase-TM | Os01g0631700 | OsR498G0101594500.01.T03 | Receptor-like protein kinase                                               |
| maker-1-augustus-gene-259.38-mRNA-1 | Japonica | NA       |           |              |                          | Transposable element protein, putative, MuDR                               |
| maker-1-augustus-gene-259.42-mRNA-1 | Japonica | Indica   | NBS       | Os12g0539800 | OsR498G0101591800.01.T01 |                                                                            |
| maker-1-augustus-gene-26.33-mRNA-1  | Japonica | Indica   |           | Os01g0147600 | OsR498G0100172400.01.T01 | Centromere protein B                                                       |
| maker-1-augustus-gene-26.36-mRNA-1  | Japonica | NA       |           |              | OsR498G0100172600.01.T02 | Factor of DNA methylation 1                                                |
| maker-1-augustus-gene-260.0-mRNA-1  | Japonica | NA       |           | Os01g0631900 |                          | Aspartic proteinase                                                        |
| maker-1-augustus-gene-261.45-mRNA-1 | Japonica | NA       |           | Os01g0635400 | OsR498G0101603500.01.T02 | Coatomer beta subunit                                                      |
| maker-1-augustus-gene-261.51-mRNA-1 | Japonica | NA       |           | Os01g0634300 | OsR498G0101600400.01.T03 | Auxilin-like protein 1                                                     |
| maker-1-augustus-gene-261.55-mRNA-1 | Japonica | Indica   |           | Os01g0842500 | OsR498G0101601600.01.T01 | Laccase                                                                    |
| maker-1-augustus-gene-261.57-mRNA-1 | Japonica | NA       |           | Os01g0634600 | OsR498G0101601800.01.T01 | Pectinesterase                                                             |
| maker-1-augustus-gene-262.11-mRNA-1 | Japonica | NA       |           | Os01g0636700 |                          | SWI/SNF-related matrix-associated actin-dependent regulator 1 of chromatin |
| maker-1-augustus-gene-262.4-mRNA-1  | Japonica | Indica   |           | Os02g0706900 | OsR498G0101606000.01.T01 | AB hydrolase-1 domain-containing protein                                   |
| maker-1-augustus-gene-262.7-mRNA-1  | Japonica | NA       |           | Os01g0637600 | OsR498G0101612800.01.T01 | Peptide deformylase                                                        |
| maker-1-augustus-gene-263.0-mRNA-1  | Japonica | NA       |           | Os01g0637800 | OsR498G0101613100.01.T01 | Myb-like transcription factor EOBI (Fragment)                              |
| maker-1-augustus-gene-263.10-mRNA-1 | Japonica | NA       |           | Os01g0637600 | OsR498G0101612800.01.T01 | Peptide deformylase                                                        |
| maker-1-augustus-gene-263.14-mRNA-1 | Japonica | NA       |           | Os01g0639200 | OsR498G0101616800.01.T01 | Cinnamoyl-CoA reductase 2                                                  |
| maker-1-augustus-gene-263.2-mRNA-1  | Japonica | NA       |           | Os01g0639100 | OsR498G0101616500.01.T03 | Eukaryotic translation initiation factor                                   |
| maker-1-augustus-gene-263.7-mRNA-1  | Japonica | NA       |           |              |                          |                                                                            |
| maker-1-augustus-gene-264.35-mRNA-1 | Japonica | NA       |           | Os01g0639900 | OsR498G0101621700.01.T03 | Carbonic anhydrase, chloroplastic                                          |
| maker-1-augustus-gene-264.49-mRNA-1 | Japonica | NA       | Kinase-TM | Os01g0641000 | OsR498G0101624900.01.T01 | Serine/threonine-protein kinase STY8                                       |
| maker-1-augustus-gene-264.51-mRNA-1 | Japonica | NA       |           |              | OsR498G0101625100.01.T01 | 5'-deoxynucleotidase                                                       |
| maker-1-augustus-gene-264.57-mRNA-1 | Japonica | NA       |           | Os01g0640800 | OsR498G0101624600.01.T04 | Ribosomal RNA large subunit methyltransferase RlmN                         |
| maker-1-augustus-gene-265.39-mRNA-1 | Japonica | Indica   |           | Os01g0643300 | OsR498G0101632900.01.T01 | Auxin efflux carrier component                                             |
| maker-1-augustus-gene-266.0-mRNA-1  | Japonica | NA       |           | Os01g0644000 | OsR498G0101637100.01.T01 |                                                                            |
| maker-1-augustus-gene-266.10-mRNA-1 | Japonica | NA       |           |              |                          | MHD2 domain-containing protein                                             |
| maker-1-augustus-gene-266.12-mRNA-1 | Japonica | NA       |           | Os01g0645000 | OsR498G0101640600.01.T01 | Butyrate response factor 1                                                 |
| maker-1-augustus-gene-266.2-mRNA-1  | Japonica | NA       |           | Os01g0643600 | OsR498G0101634400.01.T01 | Homeobox-leucine zipper protein ATHB-4                                     |
| maker-1-augustus-gene-267.0-mRNA-1  | Japonica | NA       |           | Os01g0645200 | OsR498G0101641700.01.T02 | Sodium/pyruvate cotransporter BASS2, chloroplastic                         |
| maker-1-augustus-gene-267.7-mRNA-1  | Japonica | NA       |           |              | OsR498G0101643100.01.T01 | Flavin-containing monooxygenase                                            |
| maker-1-augustus-gene-267.9-mRNA-1  | Japonica | NA       |           | Os01g0647000 | OsR498G0101647300.01.T01 | F-box domain                                                               |
| maker-1-augustus-gene-268.0-mRNA-1  | Japonica | NA       |           | Os01g0647700 | OsR498G0101650500.01.T04 | AB hydrolase-1 domain-containing protein                                   |
| maker-1-augustus-gene-268.12-mRNA-1 | Japonica | NA       |           | Os01g0648000 | OsR498G0101651000.01.T01 | Potassium channel                                                          |
| maker-1-augustus-gene-268.7-mRNA-1  | Japonica | NA       |           | Os01g0647100 | OsR498G0101647600.01.T01 | ADP,ATP carrier protein (Fragment)                                         |
| maker-1-augustus-gene-268.9-mRNA-1  | Japonica | NA       |           |              | OsR498G1119498700.01.T01 |                                                                            |
| maker-1-augustus-gene-269.0-mRNA-1  | Japonica | NA       |           |              |                          | Small-subunit processome, Utp12                                            |
| maker-1-augustus-gene-269.10-mRNA-1 | Japonica | Indica   |           | Os01g0649900 | OsR498G0101655500.01.T01 | GDSL esterase/lipase                                                       |
| maker-1-augustus-gene-269.16-mRNA-1 | Japonica | NA       |           | Os01g0649400 | OsR498G0101655700.01.T01 | GDSL esterase/lipase                                                       |
| maker-1-augustus-gene-269.19-mRNA-1 | Japonica | NA       |           | Os01g0649900 | OsR498G0101656100.01.T01 | GDSL esterase/lipase                                                       |
| maker-1-augustus-gene-269.22-mRNA-1 | Japonica | Japonica |           | Os01g0650000 | OsR498G0101656300.01.T02 |                                                                            |
| maker-1-augustus-gene-269.6-mRNA-1  | Japonica | NA       |           | Os01g0649100 | OsR498G0101655100.01.T01 | Malate dehydrogenase                                                       |
| maker-1-augustus-gene-27.71-mRNA-1  | Japonica | NA       |           | Os01g0150000 | OsR498G0100179800.01.T01 | very-long-chain enoyl-CoA reductase isoform X1                             |



|                                     |          |          |           |              |                          |                                                               |
|-------------------------------------|----------|----------|-----------|--------------|--------------------------|---------------------------------------------------------------|
| maker-1-augustus-gene-270.0-mRNA-1  | Japonica | Japonica |           | Os01g0650900 | OsR498G0101660700.01.T01 | GDSL esterase/lipase                                          |
| maker-1-augustus-gene-270.11-mRNA-1 | Japonica | NA       |           | Os01g0651800 | OsR498G0101662900.01.T01 | Phospholipase A1-IIgamma                                      |
| maker-1-augustus-gene-270.13-mRNA-1 | Japonica | NA       |           |              | OsR498G0101664300.01.T01 | Tetrahricopeptide repeat-like superfamily protein isoform 1   |
| maker-1-augustus-gene-270.2-mRNA-1  | Japonica | NA       |           |              | OsR498G0101660700.01.T01 | GDSL esterase/lipase                                          |
| maker-1-augustus-gene-270.21-mRNA-1 | Japonica | NA       |           | Os01g0652100 | OsR498G0101664600.01.T01 | Protein trichome birefringence-like protein 38                |
| maker-1-augustus-gene-270.5-mRNA-1  | Japonica | NA       |           | Os01g0651200 | OsR498G0101661100.01.T03 | Phospholipase A1-IIgamma                                      |
| maker-1-augustus-gene-270.7-mRNA-1  | Japonica | NA       |           |              | OsR498G0101661500.01.T02 | SGNH hydrolase-type esterase superfamily protein, putative    |
| maker-1-augustus-gene-270.8-mRNA-1  | Japonica | NA       |           | Os01g0651400 | OsR498G0101661500.01.T02 |                                                               |
| maker-1-augustus-gene-271.26-mRNA-1 | Japonica | NA       |           | Os01g0652600 | OsR498G0101665700.01.T03 | Acetohydroxy-acid reductoisomerase                            |
| maker-1-augustus-gene-271.32-mRNA-1 | Japonica | Indica   |           | Os05g0574100 | OsR498G0101665200.01.T02 | Phospholipase A1-IIgamma                                      |
| maker-1-augustus-gene-271.34-mRNA-1 | Japonica | NA       |           | Os01g0652800 | OsR498G0101666400.01.T01 | Leaf senescence protein-like                                  |
| maker-1-augustus-gene-271.36-mRNA-1 | Japonica | NA       |           | Os01g0653100 | OsR498G0101668200.01.T01 | Leaf senescence protein-like                                  |
| maker-1-augustus-gene-271.38-mRNA-1 | Japonica | NA       |           |              | OsR498G0101669800.01.T01 | Small subunit rRNA processing factor, putative                |
| maker-1-augustus-gene-271.40-mRNA-1 | Japonica | NA       |           | Os01g0653800 | OsR498G0101671400.01.T03 | Transcription initiation factor TFIID subunit 5               |
| maker-1-augustus-gene-272.20-mRNA-1 | Japonica | NA       |           | Os01g0654500 | OsR498G0101677000.01.T01 | Isocitrate dehydrogenase [NADP]                               |
| maker-1-augustus-gene-273.0-mRNA-1  | Japonica | NA       |           | Os01g0654966 |                          |                                                               |
| maker-1-augustus-gene-273.19-mRNA-1 | Japonica | NA       |           | Os01g0655500 | OsR498G0101681300.01.T01 | Serine/threonine-protein kinase STN7, chloroplastic           |
| maker-1-augustus-gene-273.25-mRNA-1 | Japonica | NA       |           | Os01g0655800 | OsR498G0101682500.01.T08 | Fatty acyl-CoA synthetase A                                   |
| maker-1-augustus-gene-273.34-mRNA-1 | Japonica | NA       |           |              | OsR498G0101679000.01.T01 |                                                               |
| maker-1-augustus-gene-273.8-mRNA-1  | Japonica | NA       |           |              | OsR498G0101680700.01.T01 | histone-lysine N-methyltransferase ATX4-like isoform X1       |
| maker-1-augustus-gene-274.0-mRNA-1  | Japonica | Japonica |           | Os01g0656900 | OsR498G0101687300.01.T02 |                                                               |
| maker-1-augustus-gene-274.3-mRNA-1  | Japonica | Japonica |           | Os01g0657000 | OsR498G0203372600.01.T01 | Arabinogalactan peptide, AGP                                  |
| maker-1-augustus-gene-274.7-mRNA-1  | Japonica | NA       |           |              | OsR498G0101686000.01.T01 | Myosin heavy chain-like                                       |
| maker-1-augustus-gene-274.9-mRNA-1  | Japonica | NA       |           | Os01g0657100 | OsR498G0101687800.01.T01 | H(+)/Pi cotransporter                                         |
| maker-1-augustus-gene-275.29-mRNA-1 | Japonica | Indica   |           | Os06g0330400 | OsR498G0101691100.01.T01 | Aldehyde oxygenase (deformylating)                            |
| maker-1-augustus-gene-275.31-mRNA-1 | Japonica | NA       |           | Os01g0659200 | OsR498G0101691900.01.T02 | V-type proton ATPase subunit E like                           |
| maker-1-augustus-gene-275.36-mRNA-1 | Japonica | NA       |           | Os01g0659900 | OsR498G0101693900.01.T01 | F-box/kelch-repeat protein At3g61590                          |
| maker-1-augustus-gene-275.39-mRNA-1 | Japonica | NA       |           | Os01g0658400 | OsR498G0101690600.01.T03 | UBC core domain-containing protein (Fragment)                 |
| maker-1-augustus-gene-275.41-mRNA-1 | Japonica | NA       |           |              | OsR498G0101690800.01.T01 | Vacuolar protein sorting-associated protein 25                |
| maker-1-augustus-gene-275.45-mRNA-1 | Japonica | NA       |           | Os01g0658700 | OsR498G0101691400.01.T01 | Glucose-6-phosphate 1-epimerase                               |
| maker-1-augustus-gene-275.49-mRNA-1 | Japonica | NA       |           | Os01g0658900 | OsR498G0101691600.01.T01 | G-box binding factor                                          |
| maker-1-augustus-gene-276.26-mRNA-1 | Japonica | NA       |           | Os01g0660900 | OsR498G0101697900.01.T02 | DUF588 domain-containing protein                              |
| maker-1-augustus-gene-276.30-mRNA-1 | Japonica | NA       |           | Os01g0661000 | OsR498G0101698100.01.T03 | DUF588 domain-containing protein                              |
| maker-1-augustus-gene-276.32-mRNA-1 | Japonica | NA       |           | Os01g0661400 | OsR498G0101698300.01.T04 | Ribosomal RNA-processing protein 40                           |
| maker-1-augustus-gene-276.37-mRNA-1 | Japonica | NA       |           | Os01g0661500 | OsR498G0101698300.01.T05 | AMSH-like ubiquitin thioesterase 2                            |
| maker-1-augustus-gene-276.39-mRNA-1 | Japonica | Indica   |           | Os10g0571200 | OsR498G0101695000.01.T01 | Pyruvate kinase                                               |
| maker-1-augustus-gene-277.46-mRNA-1 | Japonica | Indica   |           | Os01g0663300 | OsR498G0101703900.01.T01 | Mannan endo-1,4-beta-mannosidase                              |
| maker-1-augustus-gene-277.50-mRNA-1 | Japonica | NA       |           | Os01g0663500 | OsR498G0101704500.01.T04 | Pterin-4-alpha-carbinolamine dehydratase 2, mitochondrial     |
| maker-1-augustus-gene-277.56-mRNA-1 | Japonica | NA       |           | Os01g0664000 | OsR498G0101705300.01.T02 | PDZ domain-containing protein                                 |
| maker-1-augustus-gene-277.65-mRNA-1 | Japonica | NA       |           | Os01g0662600 | OsR498G0101701400.01.T01 | Iron-sulfur cluster assembly protein 1                        |
| maker-1-augustus-gene-277.67-mRNA-1 | Japonica | NA       |           | Os01g0662700 | OsR498G0101701600.01.T01 | 1,4-dihydroxy-2-naphthoyl-CoA synthase, peroxisomal like      |
| maker-1-augustus-gene-277.71-mRNA-1 | Japonica | Japonica |           | Os01g0662800 | OsR498G0101701800.01.T01 | GATA transcription factor 19                                  |
| maker-1-augustus-gene-277.73-mRNA-1 | Japonica | NA       |           | Os01g0663400 |                          | Aspartic proteinase                                           |
| maker-1-augustus-gene-277.75-mRNA-1 | Japonica | NA       |           | Os01g0663800 | OsR498G0101704800.01.T03 | GBF-interacting protein 1                                     |
| maker-1-augustus-gene-277.80-mRNA-1 | Japonica | NA       | Kinase-TM | Os01g0664200 | OsR498G0101706400.01.T01 | Putative serine/threonine-protein kinase                      |
| maker-1-augustus-gene-278.40-mRNA-1 | Japonica | NA       | Kinase-TM | Os01g0665200 | OsR498G0101709700.01.T01 | Mitogen-activated protein kinase                              |
| maker-1-augustus-gene-278.45-mRNA-1 | Japonica | NA       |           | Os01g0665400 | OsR498G0101710100.01.T02 | Ribokinase                                                    |
| maker-1-augustus-gene-278.47-mRNA-1 | Japonica | NA       |           |              |                          | High mobility group box domain                                |
| maker-1-augustus-gene-278.50-mRNA-1 | Japonica | NA       |           | Os01g0665300 | OsR498G0101710000.01.T02 | FCP1 homology domain-containing protein                       |
| maker-1-augustus-gene-278.55-mRNA-1 | Japonica | Japonica |           | Os01g0665500 | OsR498G0101711000.01.T01 | WRKY transcription factor                                     |
| maker-1-augustus-gene-278.58-mRNA-1 | Japonica | NA       |           | Os01g0666000 | OsR498G0101714600.01.T02 | acidPPc domain-containing protein                             |
| maker-1-augustus-gene-279.30-mRNA-1 | Japonica | NA       |           | Os01g0666600 | OsR498G0101715500.01.T01 | Alpha/beta-Hydrolases superfamily protein                     |
| maker-1-augustus-gene-279.32-mRNA-1 | Japonica | NA       |           |              | OsR498G0101716900.01.T02 |                                                               |
| maker-1-augustus-gene-279.35-mRNA-1 | Japonica | NA       |           |              | OsR498G0101718500.01.T01 | Peroxidase                                                    |
| maker-1-augustus-gene-279.37-mRNA-1 | Japonica | NA       |           | Os01g0667600 | OsR498G0101720100.01.T01 |                                                               |
| maker-1-augustus-gene-279.39-mRNA-1 | Japonica | NA       |           | Os01g0666400 | OsR498G0101715200.01.T01 | Lipase class 3-like                                           |
| maker-1-augustus-gene-279.41-mRNA-1 | Japonica | NA       |           | Os01g0666500 | OsR498G0101715400.01.T02 | Cytochrome b561/ferric reductase transmembrane protein family |
| maker-1-augustus-gene-279.43-mRNA-1 | Japonica | NA       |           | Os01g0666900 | OsR498G0101717400.01.T01 | Urease accessory protein G                                    |
| maker-1-augustus-gene-279.46-mRNA-1 | Japonica | Indica   |           | Os01g0667100 | OsR498G0101718000.01.T01 | Hydroxyacylglutathione hydrolase 3, mitochondrial             |
| maker-1-augustus-gene-279.48-mRNA-1 | Japonica | NA       |           | Os01g0667200 | OsR498G0101718200.01.T01 | Hydroxyacylglutathione hydrolase 3, mitochondrial             |
| maker-1-augustus-gene-279.53-mRNA-1 | Japonica | NA       |           |              | OsR498G0101719200.01.T01 | Homeobox domain-containing protein (Fragment)                 |

|                                     |          |          |               |              |                          |                                                                       |
|-------------------------------------|----------|----------|---------------|--------------|--------------------------|-----------------------------------------------------------------------|
| maker-1-augustus-gene-279.55-mRNA-1 | Japonica | NA       |               | Os01g0667700 | OsR498G0101720400.01.T03 | E3 ubiquitin-protein ligase arkadia isoform X2                        |
| maker-1-augustus-gene-28.15-mRNA-1  | Japonica | Indica   |               | Os01g0151400 | OsR498G0100183500.01.T01 | Gamma-glutamyltranspeptidase 3                                        |
| maker-1-augustus-gene-28.30-mRNA-1  | Japonica | NA       | Kinase-LRR-TM | Os01g0152000 | OsR498G0100183500.01.T01 | LRR receptor-like serine/threonine-protein kinase EFR                 |
| maker-1-augustus-gene-280.33-mRNA-1 | Japonica | NA       |               | Os01g0668000 | OsR498G0101723500.01.T01 | Nuclear distribution protein NUDC                                     |
| maker-1-augustus-gene-280.36-mRNA-1 | Japonica | NA       |               |              | OsR498G0101724300.01.T03 | PHD-type domain-containing protein (Fragment)                         |
| maker-1-augustus-gene-281.1-mRNA-1  | Japonica | NA       |               | Os01g0670800 | OsR498G0101731800.01.T01 | Auxin response factor                                                 |
| maker-1-augustus-gene-282.23-mRNA-1 | Japonica | Indica   |               | Os05g0562400 | OsR498G0101736100.01.T02 | Homeobox-DDT domain protein RLT1                                      |
| maker-1-augustus-gene-282.35-mRNA-1 | Japonica | NA       |               | Os01g0672400 | OsR498G0101736500.01.T01 | Drought-induced 19                                                    |
| maker-1-augustus-gene-282.40-mRNA-1 | Japonica | NA       |               |              | OsR498G0101734600.01.T03 | NAC transcriptional factor                                            |
| maker-1-augustus-gene-283.34-mRNA-1 | Japonica | NA       |               | Os01g0672700 | OsR498G0101737900.01.T01 | Non-canonical poly(A) RNA polymerase                                  |
| maker-1-augustus-gene-283.40-mRNA-1 | Japonica | Indica   |               | Os01g0672800 | OsR498G0101738400.01.T01 | DUF1421 domain-containing protein (Fragment)                          |
| maker-1-augustus-gene-283.43-mRNA-1 | Japonica | NA       | NBS-TM        |              | OsR498G0101739800.01.T04 | Katanin p60 ATPase-containing subunit                                 |
| maker-1-augustus-gene-283.48-mRNA-1 | Japonica | NA       |               | Os01g0673600 | OsR498G0101740200.01.T01 | UBC core domain-containing protein (Fragment)                         |
| maker-1-augustus-gene-283.52-mRNA-1 | Japonica | Indica   |               | Os01g0673800 | OsR498G0101741200.01.T06 | ATP synthase protein I                                                |
| maker-1-augustus-gene-283.55-mRNA-1 | Japonica | NA       |               |              | OsR498G0101744400.01.T03 | RING/U-box superfamily protein                                        |
| maker-1-augustus-gene-283.61-mRNA-1 | Japonica | NA       |               |              | OsR498G0101745400.01.T01 | Serine/threonine-protein kinase EDR1                                  |
| maker-1-augustus-gene-284.34-mRNA-1 | Japonica | NA       |               |              | OsR498G0101747500.01.T04 | Pentatricopeptide repeat-containing protein chloroplastic             |
| maker-1-augustus-gene-284.39-mRNA-1 | Japonica | NA       | Kinase-LRR-TM |              | OsR498G0101747700.01.T01 | Protein MALE DISCOVERER 1                                             |
| maker-1-augustus-gene-284.46-mRNA-1 | Japonica | NA       |               | Os01g0675000 | OsR498G0101748500.01.T01 | PRONE domain-containing protein (Fragment)                            |
| maker-1-augustus-gene-284.48-mRNA-1 | Japonica | NA       |               | Os01g0675700 | OsR498G0101750900.01.T03 | Auxin-responsive protein IAA5                                         |
| maker-1-augustus-gene-284.51-mRNA-1 | Japonica | NA       |               | Os01g0675100 | OsR498G0101748800.01.T01 | Glutaredoxin-dependent peroxiredoxin                                  |
| maker-1-augustus-gene-284.54-mRNA-1 | Japonica | NA       |               | Os01g0675500 | OsR498G0101749600.01.T01 | Glycosyltransferases                                                  |
| maker-1-augustus-gene-285.0-mRNA-1  | Japonica | Japonica |               | Os01g0676900 | OsR498G0101755300.01.T02 | SPOROCTELESS-like EAR-containing protein 3                            |
| maker-1-augustus-gene-285.10-mRNA-1 | Japonica | NA       |               |              |                          | Ubiquitin-conjugating enzyme 25                                       |
| maker-1-augustus-gene-285.12-mRNA-1 | Japonica | NA       |               |              |                          | USP domain-containing protein                                         |
| maker-1-augustus-gene-285.4-mRNA-1  | Japonica | NA       |               | Os01g0677000 | OsR498G0101755700.01.T01 | Glyoxal oxidase                                                       |
| maker-1-augustus-gene-286.30-mRNA-1 | Japonica | NA       |               | Os01g0678600 | OsR498G0101760500.01.T01 | 30S ribosomal protein S20 chloroplastic                               |
| maker-1-augustus-gene-286.32-mRNA-1 | Japonica | NA       |               | Os01g0679000 | OsR498G0101761900.01.T03 | RNA polymerase III subunit C3                                         |
| maker-1-augustus-gene-286.36-mRNA-1 | Japonica | NA       |               | Os01g0679600 | OsR498G0101763500.01.T01 | UPF0678 fatty acid-binding protein-like protein isoform A             |
| maker-1-augustus-gene-286.38-mRNA-1 | Japonica | NA       |               | Os01g0679900 | OsR498G0101764500.01.T01 | Evolutionarily conserved C-terminal region 8                          |
| maker-1-augustus-gene-286.42-mRNA-1 | Japonica | NA       |               |              |                          | Two-pore calcium channel                                              |
| maker-1-augustus-gene-286.46-mRNA-1 | Japonica | NA       |               | Os01g0678700 | OsR498G0101760800.01.T01 | Transcription factor-like protein DPB                                 |
| maker-1-augustus-gene-286.50-mRNA-1 | Japonica | NA       |               | Os01g0678800 | OsR498G0101761000.01.T01 | HMA domain-containing protein                                         |
| maker-1-augustus-gene-286.52-mRNA-1 | Japonica | NA       |               | Os01g0679700 | OsR498G0101763800.01.T01 | Ribosomal protein L37ae                                               |
| maker-1-augustus-gene-287.31-mRNA-1 | Japonica | NA       |               | Os01g0680400 | OsR498G0101767300.01.T01 | TAFII28 domain-containing protein (Fragment)                          |
| maker-1-augustus-gene-287.34-mRNA-1 | Japonica | Indica   |               | Os05g0556100 | OsR498G0101770300.01.T01 | Dynamin-related protein 5A                                            |
| maker-1-augustus-gene-287.38-mRNA-1 | Japonica | NA       |               | Os01g0681600 | OsR498G0101771700.01.T01 | Autophagy 6 isoform 1                                                 |
| maker-1-augustus-gene-287.40-mRNA-1 | Japonica | NA       |               | Os01g0680700 | OsR498G0101768200.01.T01 | Linker for activation of T-cells family member 2                      |
| maker-1-augustus-gene-287.45-mRNA-1 | Japonica | Indica   |               | Os01g0680900 | OsR498G0101769600.01.T01 | Cytochrome b561 and DOMON domain-containing protein                   |
| maker-1-augustus-gene-287.48-mRNA-1 | Japonica | NA       |               | Os01g0681000 | OsR498G0101770000.01.T01 | Diacylglycerol O-acyltransferase                                      |
| maker-1-augustus-gene-287.51-mRNA-1 | Japonica | NA       |               | Os01g0681200 | OsR498G0101770600.01.T03 | Long chain acyl-CoA synthetase 4                                      |
| maker-1-augustus-gene-287.57-mRNA-1 | Japonica | NA       |               | Os01g0681400 | OsR498G0101771000.01.T03 | beclin-1-like protein isoform X1                                      |
| maker-1-augustus-gene-287.60-mRNA-1 | Japonica | NA       |               | Os01g0681900 | OsR498G0101772400.01.T03 | NADH-dependent glutamate synthase                                     |
| maker-1-augustus-gene-288.28-mRNA-1 | Japonica | NA       |               | Os01g0682500 | OsR498G0101775100.01.T01 | D-glycerate 3-kinase chloroplastic                                    |
| maker-1-augustus-gene-288.33-mRNA-1 | Japonica | NA       |               | Os01g0683100 | OsR498G0101775900.01.T01 | Katanin p60 ATPase-containing subunit A1                              |
| maker-1-augustus-gene-288.35-mRNA-1 | Japonica | NA       |               | Os01g0683400 | OsR498G0101778300.01.T06 | Origin of replication complex subunit 4                               |
| maker-1-augustus-gene-288.42-mRNA-1 | Japonica | NA       |               |              | OsR498G0101778700.01.T02 | ER membrane protein complex subunit 6                                 |
| maker-1-augustus-gene-288.47-mRNA-1 | Japonica | NA       |               | Os01g0683700 | OsR498G0101778900.01.T02 |                                                                       |
| maker-1-augustus-gene-288.49-mRNA-1 | Japonica | NA       |               | Os01g0684200 | OsR498G0101779900.01.T08 | Protein prenyltransferase superfamily protein                         |
| maker-1-augustus-gene-288.59-mRNA-1 | Japonica | Indica   |               | Os05g0554400 | OsR498G0101778600.01.T03 | CDP-diacylglycerol--serine O-phosphatidyltransferase 1 isoform X1     |
| maker-1-augustus-gene-289.0-mRNA-1  | Japonica | Indica   |               | Os01g0684200 | OsR498G0101781300.01.T02 | protein prenyltransferase alpha subunit repeat-containing protein 1-B |
| maker-1-augustus-gene-289.10-mRNA-1 | Japonica | NA       |               | Os01g0685800 | OsR498G0101784700.01.T01 | ATP synthase subunit beta                                             |
| maker-1-augustus-gene-289.16-mRNA-1 | Japonica | NA       |               | Os01g0685900 | OsR498G0101784900.01.T01 | 65-kDa microtubule-associated protein 3                               |
| maker-1-augustus-gene-289.20-mRNA-1 | Japonica | NA       |               | Os01g0684900 | OsR498G0101781600.01.T03 | Protein DETOXIFICATION                                                |
| maker-1-augustus-gene-289.24-mRNA-1 | Japonica | NA       |               |              | OsR498G0101782000.01.T01 | t-SNARE coiled-coil homology domain-containing protein (Fragment)     |
| maker-1-augustus-gene-289.27-mRNA-1 | Japonica | NA       |               |              | OsR498G0101784200.01.T01 | DNA ligase                                                            |
| maker-1-augustus-gene-289.8-mRNA-1  | Japonica | Indica   |               | Os01g0685400 | OsR498G0101782700.01.T01 | Transcription factor RAX3                                             |
| maker-1-augustus-gene-29.59-mRNA-1  | Japonica | Japonica | Kinase-LRR-TM | Os01g0152600 | OsR498G0100187100.01.T01 | Putative LRR receptor-like serine/threonine-protein kinase            |
| maker-1-augustus-gene-29.60-mRNA-1  | Japonica | Japonica | Kinase-LRR-TM | Os01g0152800 | OsR498G0100189500.01.T01 | LRR receptor-like serine/threonine-protein kinase EFR                 |
| maker-1-augustus-gene-29.83-mRNA-1  | Japonica | Indica   |               | Os01g0153500 | OsR498G0100192100.01.T01 |                                                                       |
| maker-1-augustus-gene-29.92-mRNA-1  | Japonica | NA       |               |              |                          | DUF674 domain-containing protein                                      |

|                                     |          |          |               |              |                          |                                                                            |
|-------------------------------------|----------|----------|---------------|--------------|--------------------------|----------------------------------------------------------------------------|
| maker-1-augustus-gene-290.0-mRNA-1  | Japonica | NA       |               |              | OsR498G0101787100.01.T01 | Protein-lysine N-methyltransferase                                         |
| maker-1-augustus-gene-290.11-mRNA-1 | Japonica | NA       |               | Os01g0687500 | OsR498G0101790100.01.T05 | Methionyl-tRNA formyltransferase, mitochondrial                            |
| maker-1-augustus-gene-290.16-mRNA-1 | Japonica | Indica   |               | Os01g0686700 | OsR498G0101788000.01.T01 | RING-CH-type domain-containing protein                                     |
| maker-1-augustus-gene-290.19-mRNA-1 | Japonica | NA       |               | Os01g0687600 | OsR498G0101790400.01.T02 | serine/arginine-rich splicing factor 4-like isoform X1                     |
| maker-1-augustus-gene-290.21-mRNA-1 | Japonica | Japonica |               | Os01g0687700 | OsR498G0101790400.01.T04 | Regulator of Vps4 activity in the MVB pathway protein                      |
| maker-1-augustus-gene-290.26-mRNA-1 | Japonica | NA       |               | Os01g0687800 | OsR498G0101791000.01.T01 | L-gulonolactone oxidase                                                    |
| maker-1-augustus-gene-290.28-mRNA-1 | Japonica | NA       |               | Os01g0688200 | OsR498G0101791800.01.T02 | Caffeoylshikimate esterase                                                 |
| maker-1-augustus-gene-290.5-mRNA-1  | Japonica | NA       |               | Os01g0686800 | OsR498G0101788300.01.T02 | Guanine nucleotide-binding protein subunit beta-like protein A             |
| maker-1-augustus-gene-290.7-mRNA-1  | Japonica | NA       |               | Os01g0687300 | OsR498G0101789300.01.T05 |                                                                            |
| maker-1-augustus-gene-291.11-mRNA-1 | Japonica | Indica   |               | Os01g0688600 | OsR498G0101794400.01.T01 | Formin-like protein 18                                                     |
| maker-1-augustus-gene-291.13-mRNA-1 | Japonica | Indica   |               | Os05g0460000 | OsR498G0101795400.01.T02 | Heat shock protein cognate 70                                              |
| maker-1-augustus-gene-291.15-mRNA-1 | Japonica | Indica   |               | Os05g0551000 | OsR498G0101796800.01.T03 | Zinc finger protein BRUTUS (Fragment)                                      |
| maker-1-augustus-gene-291.20-mRNA-1 | Japonica | NA       |               | Os01g0689600 | OsR498G0101798600.01.T05 | Retrovirus-related Pol polyprotein LINE-1                                  |
| maker-1-augustus-gene-291.26-mRNA-1 | Japonica | Indica   | Kinase-TM     | Os01g0689900 | OsR498G0101799400.01.T01 | Wall-associated receptor-like kinase 2                                     |
| maker-1-augustus-gene-291.4-mRNA-1  | Japonica | NA       |               | Os01g0689000 | OsR498G0101795900.01.T01 | Formin-like protein 5                                                      |
| maker-1-augustus-gene-291.6-mRNA-1  | Japonica | NA       |               | Os01g0689800 | OsR498G0101799100.01.T01 | Alpha/beta hydrolase domain-containing protein 17C-like                    |
| maker-1-augustus-gene-292.0-mRNA-1  | Japonica | NA       |               |              |                          | Protein kinase domain-containing protein                                   |
| maker-1-augustus-gene-292.1-mRNA-1  | Japonica | NA       | Kinase-TM     | Os01g0690800 | OsR498G0101800500.01.T01 | Protein kinase domain-containing protein (Fragment)                        |
| maker-1-augustus-gene-292.17-mRNA-1 | Japonica | NA       |               | Os01g0691700 | OsR498G0101802300.01.T01 | Phytochrome-associated serine/threonine-protein phosphatase                |
| maker-1-augustus-gene-292.22-mRNA-1 | Japonica | Indica   |               | Os01g0692300 | OsR498G0101803900.01.T01 | Protein PLASTID MOVEMENT IMPAIRED 2                                        |
| maker-1-augustus-gene-292.25-mRNA-1 | Japonica | NA       |               | Os01g0692600 | OsR498G0101804100.01.T01 | Abhydrolase domain-containing protein 1 (Fragment)                         |
| maker-1-augustus-gene-292.29-mRNA-1 | Japonica | Indica   |               | Os01g0691500 | OsR498G0101801800.01.T01 | Cytidylyltransferase domain protein                                        |
| maker-1-augustus-gene-292.4-mRNA-1  | Japonica | NA       | Kinase-TM     |              | OsR498G0101800900.01.T01 | Acidic endochitinase                                                       |
| maker-1-augustus-gene-292.40-mRNA-1 | Japonica | NA       |               | Os01g0692100 | OsR498G0101803400.01.T01 | Glutathione S-transferase GSTU6                                            |
| maker-1-augustus-gene-292.42-mRNA-1 | Japonica | Indica   |               | Os01g0692700 | OsR498G0101804400.01.T01 | E3 ubiquitin ligase BIG BROTHUR                                            |
| maker-1-augustus-gene-292.7-mRNA-1  | Japonica | Indica   |               | Os01g0691400 | OsR498G0101801500.01.T01 | Reticulon-like protein (Fragment)                                          |
| maker-1-augustus-gene-293.0-mRNA-1  | Japonica | NA       |               | Os01g0693300 | OsR498G0101806500.01.T03 | Lipid phosphate phosphatase 2                                              |
| maker-1-augustus-gene-293.15-mRNA-1 | Japonica | NA       |               | Os01g0694200 | OsR498G0101815200.01.T03 |                                                                            |
| maker-1-augustus-gene-293.18-mRNA-1 | Japonica | NA       |               |              | OsR498G0101815600.01.T01 | Symplekin                                                                  |
| maker-1-augustus-gene-293.3-mRNA-1  | Japonica | NA       | Kinase-LRR-TM |              |                          | Receptor kinase MRKa                                                       |
| maker-1-augustus-gene-293.5-mRNA-1  | Japonica | NA       | Kinase-LRR-TM |              |                          | Leucine-rich repeat receptor kinase-like protein                           |
| maker-1-augustus-gene-293.8-mRNA-1  | Japonica | NA       |               | Os01g0693900 | OsR498G0101813400.01.T03 | Peptidyl-tRNA hydrolase chloroplastic                                      |
| maker-1-augustus-gene-294.0-mRNA-1  | Japonica | NA       |               | Os01g0694900 | OsR498G0101817300.01.T05 | ENTH domain-containing protein (Fragment)                                  |
| maker-1-augustus-gene-294.10-mRNA-1 | Japonica | Indica   |               | Os01g0695200 | OsR498G0101818100.01.T01 | Core-2/I-branching beta-1,6-N-acetylglucosaminyltransferase family protein |
| maker-1-augustus-gene-294.16-mRNA-1 | Japonica | NA       |               | Os01g0695700 | OsR498G0101819100.01.T06 | ABC transporter B family member 9                                          |
| maker-1-augustus-gene-294.22-mRNA-1 | Japonica | NA       |               | Os01g0695900 | OsR498G0101820100.01.T01 | Transcription repressor MYB5                                               |
| maker-1-augustus-gene-294.24-mRNA-1 | Japonica | NA       |               |              | OsR498G0101820500.01.T05 | ABC transporter B family member 4-like                                     |
| maker-1-augustus-gene-294.27-mRNA-1 | Japonica | Indica   |               | Os01g0695300 | OsR498G0101818600.01.T03 | Farnesyl pyrophosphate synthetase                                          |
| maker-1-augustus-gene-294.28-mRNA-1 | Japonica | NA       |               |              | OsR498G0101818600.01.T05 | D-cysteine desulfhydrase 2 mitochondrial                                   |
| maker-1-augustus-gene-294.43-mRNA-1 | Japonica | NA       |               |              |                          | p-glycoprotein-like                                                        |
| maker-1-augustus-gene-294.48-mRNA-1 | Japonica | NA       |               | Os01g0696100 | OsR498G0101820800.01.T02 | Two-pore potassium channel 2                                               |
| maker-1-augustus-gene-294.5-mRNA-1  | Japonica | NA       |               | Os01g0695100 | OsR498G0101817900.01.T01 | Phosphomethylethanolamine N-methyltransferase-like                         |
| maker-1-augustus-gene-295.0-mRNA-1  | Japonica | Indica   |               | Os01g0695700 | OsR498G0101822500.01.T01 | ABC transporter B family member 4                                          |
| maker-1-augustus-gene-295.10-mRNA-1 | Japonica | NA       |               | Os01g0698300 |                          | Zinc finger BED domain-containing protein DAYSLEEPER                       |
| maker-1-augustus-gene-295.5-mRNA-1  | Japonica | NA       |               | Os01g0698100 | OsR498G0101826700.01.T03 | SWAP (Suppressor-of-White-APricot)/surp domain-containing protein          |
| maker-1-augustus-gene-296.0-mRNA-1  | Japonica | NA       |               | Os01g0698900 | OsR498G0101828700.01.T01 | Nascent polypeptide associated complex alpha subunit                       |
| maker-1-augustus-gene-296.11-mRNA-1 | Japonica | NA       |               | Os01g0700200 | OsR498G0101835300.01.T04 | E3 ubiquitin-protein ligase HERC2                                          |
| maker-1-augustus-gene-296.16-mRNA-1 | Japonica | Japonica |               | Os01g0700500 | OsR498G0101835700.01.T01 | Cytochrome P450 family 706 subfamily A polypeptide 5                       |
| maker-1-augustus-gene-296.18-mRNA-1 | Japonica | Indica   |               | Os01g0698800 | OsR498G0101828000.01.T01 |                                                                            |
| maker-1-augustus-gene-296.20-mRNA-1 | Japonica | NA       | Kinase        | Os01g0699500 | OsR498G0101831600.01.T01 | Putative MAPKKK family protein kinase                                      |
| maker-1-augustus-gene-296.21-mRNA-1 | Japonica | Indica   |               | Os01g0701700 | OsR498G0101835600.01.T01 | SABATH methyltransferase 5                                                 |
| maker-1-augustus-gene-296.4-mRNA-1  | Japonica | NA       |               | Os01g0699900 | OsR498G0101833700.01.T01 | Plasma membrane associated protein-like protein (Fragment)                 |
| maker-1-augustus-gene-296.6-mRNA-1  | Japonica | NA       |               | Os01g0700000 | OsR498G0101834700.01.T02 |                                                                            |
| maker-1-augustus-gene-296.8-mRNA-1  | Japonica | NA       |               | Os01g0700100 | OsR498G0101835100.01.T01 | Bidirectional sugar transporter SWEET                                      |
| maker-1-augustus-gene-297.1-mRNA-1  | Japonica | Japonica |               | Os01g0701300 | OsR498G0101836700.01.T01 | Thromboxane-A synthase                                                     |
| maker-1-augustus-gene-297.13-mRNA-1 | Japonica | NA       |               | Os01g0702000 | OsR498G0101838600.01.T03 | BFN domain-containing protein (Fragment)                                   |
| maker-1-augustus-gene-297.4-mRNA-1  | Japonica | Indica   |               | Os01g0701500 | OsR498G0101836900.01.T01 | Thromboxane-A synthase                                                     |
| maker-1-augustus-gene-297.8-mRNA-1  | Japonica | Indica   |               | Os01g0701900 | OsR498G0101838400.01.T03 | Putative CRAL/TRIO domain containing, Sec14p-like phosphatidylinositol tra |
| maker-1-augustus-gene-298.0-mRNA-1  | Japonica | NA       |               | Os01g0702300 | OsR498G0101839700.01.T01 | Subtilisin-like serine protease                                            |
| maker-1-augustus-gene-298.14-mRNA-1 | Japonica | NA       |               | Os01g0702500 | OsR498G0101840500.01.T01 | Dehydrin Xero 1                                                            |
| maker-1-augustus-gene-298.16-mRNA-1 | Japonica | NA       |               |              | OsR498G0101843700.01.T01 | RING/U-box domain-containing protein isoform 2                             |

|                                     |          |          |               |              |                          |                                                                      |
|-------------------------------------|----------|----------|---------------|--------------|--------------------------|----------------------------------------------------------------------|
| maker-1-augustus-gene-298.18-mRNA-1 | Japonica | NA       |               | Os01g0703400 | OsR498G0101844100.01.T01 | Farnesyl pyrophosphate synthase mRNA                                 |
| maker-1-augustus-gene-298.23-mRNA-1 | Japonica | NA       |               | Os01g0703600 | OsR498G0101844300.01.T01 | MHD domain-containing protein                                        |
| maker-1-augustus-gene-298.3-mRNA-1  | Japonica | NA       |               | Os01g0702400 | OsR498G0101839900.01.T01 | J domain-containing protein                                          |
| maker-1-augustus-gene-298.30-mRNA-1 | Japonica | NA       |               |              | OsR498G0101845300.01.T04 | Transmembrane protein, putative                                      |
| maker-1-augustus-gene-298.35-mRNA-1 | Japonica | NA       |               | Os01g0702700 | OsR498G0101841800.01.T01 | MYB transcription factor                                             |
| maker-1-augustus-gene-298.38-mRNA-1 | Japonica | NA       |               | Os01g0704000 | OsR498G0101844800.01.T01 | PMEI domain-containing protein                                       |
| maker-1-augustus-gene-298.9-mRNA-1  | Japonica | Indica   |               | Os01g0702450 | OsR498G0101840300.01.T01 | J domain-containing protein                                          |
| maker-1-augustus-gene-299.0-mRNA-1  | Japonica | NA       |               |              | OsR498G0101847100.01.T05 | Chloride channel protein CLC-e                                       |
| maker-1-augustus-gene-299.11-mRNA-1 | Japonica | NA       |               |              | OsR498G0101855500.01.T01 | Ribosomal RNA apurinic site specific lyase-like                      |
| maker-1-augustus-gene-299.13-mRNA-1 | Japonica | NA       |               | Os01g0704400 |                          | zf-RVT domain-containing protein                                     |
| maker-1-augustus-gene-299.16-mRNA-1 | Japonica | NA       |               | Os01g0705200 | OsR498G0101849200.01.T01 | Late embryogenesis abundant protein, group 3                         |
| maker-1-augustus-gene-299.18-mRNA-1 | Japonica | NA       |               | Os01g0705300 | OsR498G0101850000.01.T01 | Plastid transcriptionally active7                                    |
| maker-1-augustus-gene-299.20-mRNA-1 | Japonica | NA       |               | Os01g0706000 | OsR498G0101854200.01.T01 | RNA polymerase II transcriptional coactivator KELP                   |
| maker-1-augustus-gene-299.6-mRNA-1  | Japonica | NA       |               | Os01g0706100 | OsR498G0101854900.01.T01 |                                                                      |
| maker-1-augustus-gene-299.9-mRNA-1  | Japonica | NA       |               |              | OsR498G0101855100.01.T01 | Cullin domain-containing protein                                     |
| maker-1-augustus-gene-3.0-mRNA-1    | Japonica | NA       |               |              |                          |                                                                      |
| maker-1-augustus-gene-3.15-mRNA-1   | Japonica | NA       |               | Os01g0104100 | OsR498G0100015500.01.T03 | E3 ubiquitin-protein ligase CHFR                                     |
| maker-1-augustus-gene-3.17-mRNA-1   | Japonica | Indica   |               | Os01g0104200 | OsR498G0100015900.01.T01 | NAC transcription factor                                             |
| maker-1-augustus-gene-3.21-mRNA-1   | Japonica | NA       |               | Os01g0104800 | OsR498G0100017900.01.T04 | Sas10 domain-containing protein                                      |
| maker-1-augustus-gene-3.26-mRNA-1   | Japonica | NA       | Kinase-TM     | Os01g0104000 | OsR498G0100015400.01.T01 | C-type lectin receptor-like tyrosine-protein kinase                  |
| maker-1-augustus-gene-3.29-mRNA-1   | Japonica | NA       |               | Os01g0104600 | OsR498G0100017400.01.T04 | Light-mediated development protein DET1                              |
| maker-1-augustus-gene-3.33-mRNA-1   | Japonica | Japonica |               | Os01g0104900 | OsR498G0100018400.01.T01 | Omega-hydroxypalmitate O-feruloyl transferase                        |
| maker-1-augustus-gene-3.36-mRNA-1   | Japonica | Indica   |               | Os01g0104900 | OsR498G0100018800.01.T01 | Omega-hydroxypalmitate O-feruloyl transferase                        |
| maker-1-augustus-gene-3.4-mRNA-1    | Japonica | NA       |               | Os01g0103800 | OsR498G0100014700.01.T02 | Hydroxyproline-rich glycoprotein family protein                      |
| maker-1-augustus-gene-3.8-mRNA-1    | Japonica | Indica   |               | Os01g0103900 | OsR498G0100015100.01.T01 |                                                                      |
| maker-1-augustus-gene-300.0-mRNA-1  | Japonica | NA       |               | Os01g0706400 | OsR498G0101856100.01.T01 | Regulator of Vps4 activity in the MVB pathway-like protein isoform 1 |
| maker-1-augustus-gene-300.11-mRNA-1 | Japonica | NA       |               | Os01g0706700 | OsR498G0101856600.01.T04 |                                                                      |
| maker-1-augustus-gene-300.17-mRNA-1 | Japonica | NA       |               | Os01g0706800 | OsR498G0101857000.01.T01 | Jacalin-type lectin domain-containing protein (Fragment)             |
| maker-1-augustus-gene-300.19-mRNA-1 | Japonica | NA       |               | Os01g0706900 | OsR498G0101857400.01.T01 | IAA-amino acid hydrolase                                             |
| maker-1-augustus-gene-300.4-mRNA-1  | Japonica | NA       |               | Os01g0706500 | OsR498G0101856300.01.T02 | 60S ribosomal protein l28                                            |
| maker-1-augustus-gene-300.7-mRNA-1  | Japonica | NA       |               | Os01g0707300 | OsR498G0101858100.01.T01 | Vesicle transport v-SNARE 12                                         |
| maker-1-augustus-gene-301.0-mRNA-1  | Japonica | NA       |               | Os01g0708000 | OsR498G0101861700.01.T02 | Homeodomain-like/winged-helix DNA-binding family protein (Fragment)  |
| maker-1-augustus-gene-301.12-mRNA-1 | Japonica | Indica   | Kinase        | Os05g0593800 | OsR498G0101862300.01.T01 | Serine/threonine protein kinase                                      |
| maker-1-augustus-gene-301.17-mRNA-1 | Japonica | NA       |               |              | OsR498G0101862900.01.T03 | Trafficking protein particle complex subunit                         |
| maker-1-augustus-gene-301.21-mRNA-1 | Japonica | NA       |               | Os01g0708900 | OsR498G0101864100.01.T01 | Graves disease carrier                                               |
| maker-1-augustus-gene-301.26-mRNA-1 | Japonica | NA       |               | Os01g0709000 | OsR498G0101864900.01.T01 | Transcription factor MYB26                                           |
| maker-1-augustus-gene-301.29-mRNA-1 | Japonica | NA       |               | Os01g0709400 | OsR498G0101865300.01.T01 | 5'-nucleotidase SurE                                                 |
| maker-1-augustus-gene-301.32-mRNA-1 | Japonica | NA       |               | Os01g0708500 | OsR498G0101862600.01.T04 | Cytokinin riboside 5'-monophosphate phosphoribohydrolase             |
| maker-1-augustus-gene-301.38-mRNA-1 | Japonica | NA       |               | Os01g0708700 | OsR498G0101863200.01.T02 | lQ-domain 6                                                          |
| maker-1-augustus-gene-301.40-mRNA-1 | Japonica | NA       | Kinase-TM     | Os01g0709500 | OsR498G0101865600.01.T04 | Receptor-like serine/threonine-protein kinase ALE2                   |
| maker-1-augustus-gene-301.6-mRNA-1  | Japonica | NA       |               |              | OsR498G0101862100.01.T02 | Probable magnesium transporter                                       |
| maker-1-augustus-gene-302.0-mRNA-1  | Japonica | NA       |               |              |                          | WD-40 repeat-containing protein MSI4                                 |
| maker-1-augustus-gene-302.11-mRNA-1 | Japonica | Indica   |               | Os01g0711100 | OsR498G0101869900.01.T01 | Mitochondrial-processing peptidase subunit beta                      |
| maker-1-augustus-gene-302.17-mRNA-1 | Japonica | NA       | Kinase-LRR-TM | Os01g0711200 | OsR498G0101870300.01.T01 | Leucine-rich repeat transmembrane protein kinase                     |
| maker-1-augustus-gene-302.19-mRNA-1 | Japonica | NA       |               | Os01g0711400 | OsR498G0101870900.01.T01 | Glycine dehydrogenase (aminomethyl-transferring)                     |
| maker-1-augustus-gene-302.29-mRNA-1 | Japonica | NA       |               | Os01g0711500 | OsR498G0101871100.01.T02 | Calcineurin B-like protein 9                                         |
| maker-1-augustus-gene-302.35-mRNA-1 | Japonica | NA       |               | Os01g0711600 | OsR498G0101871300.01.T01 | Reversion-to-ethylene sensitivity1                                   |
| maker-1-augustus-gene-302.37-mRNA-1 | Japonica | Indica   |               | Os01g0924700 | OsR498G0101868400.01.T02 | Protein kinase domain-containing protein                             |
| maker-1-augustus-gene-302.39-mRNA-1 | Japonica | NA       |               | Os01g0711800 | OsR498G0101872000.01.T01 | Nucleosome assembly protein like                                     |
| maker-1-augustus-gene-302.41-mRNA-1 | Japonica | Japonica |               | Os01g0712500 | OsR498G0101874800.01.T02 | Cytidine deaminase-like                                              |
| maker-1-augustus-gene-302.5-mRNA-1  | Japonica | NA       |               | Os01g0711000 | OsR498G0101869700.01.T02 | Vacuolar proton pump subunit B                                       |
| maker-1-augustus-gene-303.30-mRNA-1 | Japonica | NA       |               |              | OsR498G0101876100.01.T01 | Peroxidase                                                           |
| maker-1-augustus-gene-303.32-mRNA-1 | Japonica | NA       |               | Os01g0713200 | OsR498G0101877100.01.T01 | Glucan endo-1,3-beta-glucosidase GII                                 |
| maker-1-augustus-gene-303.34-mRNA-1 | Japonica | Indica   |               | Os01g0713600 | OsR498G0101878300.01.T01 | B3 domain transcription factor                                       |
| maker-1-augustus-gene-303.36-mRNA-1 | Japonica | Japonica |               | Os01g0713700 | OsR498G0101878900.01.T01 | KRR-R motif-containing protein 1                                     |
| maker-1-augustus-gene-303.39-mRNA-1 | Japonica | NA       |               | Os03g0237200 |                          | Zinc finger, C2H2 type family protein, expressed                     |
| maker-1-augustus-gene-303.41-mRNA-1 | Japonica | NA       |               |              |                          | Myosin-17                                                            |
| maker-1-augustus-gene-303.47-mRNA-1 | Japonica | NA       |               |              | OsR498G0101880200.01.T01 | Protein PLASTID MOVEMENT IMPAIRED 1-RELATED like                     |
| maker-1-augustus-gene-304.1-mRNA-1  | Japonica | NA       |               |              | OsR498G0101882900.01.T01 | Signal recognition particle 54 kDa protein, chloroplastic-like       |
| maker-1-augustus-gene-304.11-mRNA-1 | Japonica | NA       |               | Os01g0714900 | OsR498G0101881600.01.T01 | Ras-related protein Rab7                                             |
| maker-1-augustus-gene-304.15-mRNA-1 | Japonica | Indica   |               | Os01g0715000 | OsR498G0101881800.01.T03 | Cellular nucleic acid-binding protein                                |

|                                     |          |          |              |              |                          |                                                                            |
|-------------------------------------|----------|----------|--------------|--------------|--------------------------|----------------------------------------------------------------------------|
| maker-1-augustus-gene-304.18-mRNA-1 | Japonica | NA       |              |              | OsR498G0101881800.01.T05 | Zinc finger CCH domain-containing protein 9 isoform X1                     |
| maker-1-augustus-gene-304.20-mRNA-1 | Japonica | NA       |              | Os01g0715500 | OsR498G0101884600.01.T01 | Outer mitochondrial membrane protein porin                                 |
| maker-1-augustus-gene-304.23-mRNA-1 | Japonica | NA       |              |              | OsR498G0101885400.01.T03 | Auxin efflux carrier component                                             |
| maker-1-augustus-gene-304.26-mRNA-1 | Japonica | NA       |              | Os01g0715800 | OsR498G0101886200.01.T02 | Eukaryotic translation initiation factor 3 subunit C (Fragment)            |
| maker-1-augustus-gene-304.3-mRNA-1  | Japonica | Indica   |              | Os01g0715400 | OsR498G0101884300.01.T03 | Alpha-amylase                                                              |
| maker-1-augustus-gene-304.9-mRNA-1  | Japonica | Japonica |              | Os01g0714800 | OsR498G0101881000.01.T01 | WRKY transcription factor                                                  |
| maker-1-augustus-gene-305.27-mRNA-1 | Japonica | NA       |              | Os01g0716400 | OsR498G0101888500.01.T04 | VDE domain-containing protein (Fragment)                                   |
| maker-1-augustus-gene-305.30-mRNA-1 | Japonica | NA       |              | Os01g0716500 | OsR498G0101888500.01.T01 | Embryonic abundant protein-like                                            |
| maker-1-augustus-gene-305.32-mRNA-1 | Japonica | NA       |              |              |                          | Type IV inositol polyphosphate 5-phosphatase 3                             |
| maker-1-augustus-gene-305.35-mRNA-1 | Japonica | NA       |              | Os01g0717400 | OsR498G0101896900.01.T01 | Alliin lyase                                                               |
| maker-1-augustus-gene-305.38-mRNA-1 | Japonica | NA       |              | Os01g0716200 | OsR498G0101888000.01.T05 | Orphans transcription factor                                               |
| maker-1-augustus-gene-305.42-mRNA-1 | Japonica | Japonica |              | Os01g0716300 | OsR498G0101888400.01.T01 | MRN complex-interacting protein                                            |
| maker-1-augustus-gene-305.45-mRNA-1 | Japonica | NA       |              | Os01g0717000 | OsR498G0101891000.01.T01 | Choline/ethanolamine kinase                                                |
| maker-1-augustus-gene-305.49-mRNA-1 | Japonica | Indica   |              | Os01g0718000 | OsR498G0101897400.01.T01 | Zinc finger A20 and AN1 domain-containing stress-associated protein 2      |
| maker-1-augustus-gene-306.30-mRNA-1 | Japonica | NA       |              | Os01g0717700 | OsR498G0101898100.01.T01 | Tryptophan aminotransferase-related protein 4                              |
| maker-1-augustus-gene-306.33-mRNA-1 | Japonica | NA       |              |              | OsR498G0101903500.01.T01 | Potassium uptake channel                                                   |
| maker-1-augustus-gene-306.35-mRNA-1 | Japonica | NA       |              | Os01g0719000 | OsR498G0101904300.01.T01 | FLZ-type domain-containing protein                                         |
| maker-1-augustus-gene-306.37-mRNA-1 | Japonica | Indica   |              | Os01g0719250 | OsR498G0101904900.01.T02 |                                                                            |
| maker-1-augustus-gene-306.39-mRNA-1 | Japonica | NA       |              | Os01g0719300 | OsR498G0101906500.01.T02 | STAS domain-containing protein (Fragment)                                  |
| maker-1-augustus-gene-306.40-mRNA-1 | Japonica | NA       |              | Os01g0719300 | OsR498G0101906500.01.T01 | Sulfate transporter 3.5 like                                               |
| maker-1-augustus-gene-306.49-mRNA-1 | Japonica | NA       |              | Os01g0719100 | OsR498G0101904800.01.T06 | E3 ubiquitin-protein like                                                  |
| maker-1-augustus-gene-307.0-mRNA-1  | Japonica | Indica   |              | Os01g0719400 | OsR498G0101906700.01.T02 | Btz domain-containing protein (Fragment)                                   |
| maker-1-augustus-gene-307.11-mRNA-1 | Japonica | Indica   |              | Os01g0719700 | OsR498G0101907300.01.T01 | Fe-S cluster assembly factor HCF101 chloroplastic                          |
| maker-1-augustus-gene-307.16-mRNA-1 | Japonica | NA       |              | Os01g0720800 | OsR498G0101910100.01.T02 | Fusarium resistance protein I2C-5-like                                     |
| maker-1-augustus-gene-307.18-mRNA-1 | Japonica | Indica   |              | Os05g0533800 | OsR498G0101908000.01.T01 | Hydrogen-transporting ATP synthase, rotational mechanism                   |
| maker-1-augustus-gene-307.20-mRNA-1 | Japonica | Indica   |              | Os05g0533700 | OsR498G0101908200.01.T01 | NADH dehydrogenase2                                                        |
| maker-1-augustus-gene-307.22-mRNA-1 | Japonica | NA       |              | Os01g0720600 | OsR498G0101909600.01.T03 | Starch synthase, chloroplastic/amyloplastic                                |
| maker-1-augustus-gene-307.8-mRNA-1  | Japonica | NA       |              | Os01g0719600 | OsR498G0101907100.01.T01 | HMA domain-containing protein                                              |
| maker-1-augustus-gene-308.0-mRNA-1  | Japonica | NA       |              | Os01g0722100 | OsR498G0101914500.01.T07 | Putative acyl-acyl-carrier-proteinUDP-N-acetylglucosamine O-acyltransferas |
| maker-1-augustus-gene-308.12-mRNA-1 | Japonica | Indica   |              | Os01g0722700 | OsR498G0101915900.01.T01 | Phosphotransferase                                                         |
| maker-1-augustus-gene-308.18-mRNA-1 | Japonica | NA       |              |              | OsR498G0101916300.01.T01 | BED-type domain-containing protein                                         |
| maker-1-augustus-gene-308.21-mRNA-1 | Japonica | NA       |              | Os01g0723100 | OsR498G0101917500.01.T02 | Senescence domain-containing protein (Fragment)                            |
| maker-1-augustus-gene-308.29-mRNA-1 | Japonica | NA       |              | Os01g0723500 | OsR498G0101918700.01.T01 | B3 domain-containing protein (Fragment)                                    |
| maker-1-augustus-gene-308.32-mRNA-1 | Japonica | NA       |              | Os01g0723600 | OsR498G0101918900.01.T01 | Ribose-phosphate pyrophosphokinase                                         |
| maker-1-augustus-gene-308.35-mRNA-1 | Japonica | NA       |              | Os01g0723700 | OsR498G0101919300.01.T03 | TF-B3 domain-containing protein (Fragment)                                 |
| maker-1-augustus-gene-308.37-mRNA-1 | Japonica | NA       |              | Os01g0721900 | OsR498G0101914200.01.T01 | RGF repeats nuclear RNA binding protein A                                  |
| maker-1-augustus-gene-308.41-mRNA-1 | Japonica | NA       |              | Os01g0723000 | OsR498G0101917000.01.T03 | Tr-type G domain-containing protein                                        |
| maker-1-augustus-gene-308.43-mRNA-1 | Japonica | NA       |              | Os01g0723200 | OsR498G0101917800.01.T01 | 40S ribosomal protein S24                                                  |
| maker-1-augustus-gene-308.6-mRNA-1  | Japonica | NA       |              | Os01g0722300 | OsR498G0101914900.01.T01 | transcription factor RAX2                                                  |
| maker-1-augustus-gene-309.37-mRNA-1 | Japonica | NA       |              |              | OsR498G0101922300.01.T01 | Pleiotropic drug resistance transporter 5                                  |
| maker-1-augustus-gene-309.44-mRNA-1 | Japonica | NA       |              | Os01g0725400 | OsR498G0101925700.01.T03 |                                                                            |
| maker-1-augustus-gene-309.45-mRNA-1 | Japonica | NA       |              | Os01g0725600 | OsR498G0101926100.01.T03 | Ultraviolet-B receptor like                                                |
| maker-1-augustus-gene-309.56-mRNA-1 | Japonica | Indica   | CC-Kinase-TM | Os01g0725800 | OsR498G0101926500.01.T05 | Protein kinase-like domain, Coatomer beta' subunit (COPB2), WD40 repeat,   |
| maker-1-augustus-gene-309.60-mRNA-1 | Japonica | NA       |              | Os01g0723800 | OsR498G0101919800.01.T01 | Multidrug/pheromone exporter, MDR family, ABC transporter family           |
| maker-1-augustus-gene-309.62-mRNA-1 | Japonica | NA       |              | Os01g0725900 | OsR498G0101926800.01.T01 | Non-classical arabinogalactan protein 31-like                              |
| maker-1-augustus-gene-309.64-mRNA-1 | Japonica | NA       |              | Os01g0726100 | OsR498G0101925400.01.T02 | Non-classical arabinogalactan protein 31-like                              |
| maker-1-augustus-gene-309.66-mRNA-1 | Japonica | NA       |              | Os01g0726400 | OsR498G0101927400.01.T02 | MADS-box transcription factor 32                                           |
| maker-1-augustus-gene-310.44-mRNA-1 | Japonica | NA       |              | Os01g0726700 | OsR498G0101927700.01.T01 | Protodermal factor 1 like                                                  |
| maker-1-augustus-gene-310.47-mRNA-1 | Japonica | NA       |              | Os01g0727100 | OsR498G0101929300.01.T01 | Hexosyltransferase                                                         |
| maker-1-augustus-gene-310.50-mRNA-1 | Japonica | NA       |              | Os01g0727400 | OsR498G0101929500.01.T05 | Complex I intermediate-associated protein 30                               |
| maker-1-augustus-gene-310.56-mRNA-1 | Japonica | NA       |              | Os01g0727900 | OsR498G0101931300.01.T03 | DNA primase small subunit                                                  |
| maker-1-augustus-gene-310.58-mRNA-1 | Japonica | Indica   |              | Os05g0518300 | OsR498G0101931500.01.T02 | GDSL esterase/lipase                                                       |
| maker-1-augustus-gene-310.60-mRNA-1 | Japonica | NA       |              |              | OsR498G0101928600.01.T01 |                                                                            |
| maker-1-augustus-gene-310.62-mRNA-1 | Japonica | Indica   |              | Os01g0727800 | OsR498G0101931000.01.T01 | Subtilisin-like protease                                                   |
| maker-1-augustus-gene-310.66-mRNA-1 | Japonica | NA       |              |              | OsR498G0101932000.01.T02 |                                                                            |
| maker-1-augustus-gene-310.69-mRNA-1 | Japonica | NA       |              | Os01g0728300 | OsR498G0101932200.01.T01 | Secologanin synthase                                                       |
| maker-1-augustus-gene-311.42-mRNA-1 | Japonica | NA       |              | Os01g0729100 | OsR498G0101933500.01.T02 | DUF92 domain-containing protein (Fragment)                                 |
| maker-1-augustus-gene-311.45-mRNA-1 | Japonica | NA       |              | Os01g0729900 | OsR498G0101935700.01.T05 | 6-hydroxymethyl-7,8-dihydropterin pyrophosphokinase                        |
| maker-1-augustus-gene-311.48-mRNA-1 | Japonica | NA       |              |              | OsR498G0101935900.01.T01 | Inhibitor I9 domain-containing protein                                     |
| maker-1-augustus-gene-311.50-mRNA-1 | Japonica | NA       |              | Os01g0730300 | OsR498G0101936700.01.T01 | Trehalose-phosphatase                                                      |
| maker-1-augustus-gene-311.53-mRNA-1 | Japonica | NA       |              | Os01g0730500 | OsR498G0101937700.01.T02 | Ferredoxin-1 (Fragment)                                                    |

|                                     |          |          |               |              |                          |                                                                            |
|-------------------------------------|----------|----------|---------------|--------------|--------------------------|----------------------------------------------------------------------------|
| maker-1-augustus-gene-311.57-mRNA-1 | Japonica | NA       |               | Os01g0728700 | OsR498G0101932800.01.T01 | Oil body-associated protein 2B                                             |
| maker-1-augustus-gene-311.59-mRNA-1 | Japonica | NA       |               | Os01g0729600 | OsR498G0101934800.01.T01 | Putative pyridoxal phosphate-dependent transferase                         |
| maker-1-augustus-gene-311.61-mRNA-1 | Japonica | NA       |               | Os01g0730100 | OsR498G0101936200.01.T01 | FBD domain-containing protein (Fragment)                                   |
| maker-1-augustus-gene-311.63-mRNA-1 | Japonica | NA       |               | Os01g0730700 | OsR498G0101938600.01.T01 | WRKY transcription factor 5                                                |
| maker-1-augustus-gene-312.38-mRNA-1 | Japonica | NA       |               | Os01g0730800 | OsR498G0101939300.01.T04 | Peroxisomal membrane protein 2                                             |
| maker-1-augustus-gene-312.42-mRNA-1 | Japonica | NA       |               | Os01g0732200 | OsR498G0101942100.01.T02 | EngB-type G domain-containing protein (Fragment)                           |
| maker-1-augustus-gene-312.44-mRNA-1 | Japonica | Indica   |               | Os01g0732600 | OsR498G0101944100.01.T01 | Flavin-containing monooxygenase                                            |
| maker-1-augustus-gene-312.46-mRNA-1 | Japonica | NA       |               | Os01g0733200 | OsR498G0101946100.01.T01 | Heat shock transcription factor class C                                    |
| maker-1-augustus-gene-312.48-mRNA-1 | Japonica | Indica   |               | Os01g0730900 | OsR498G0101939600.01.T03 | DNA polymerase III subunit gamma/tau                                       |
| maker-1-augustus-gene-312.52-mRNA-1 | Japonica | NA       |               | Os01g0731000 | OsR498G0101940000.01.T01 | UBD domain-containing protein                                              |
| maker-1-augustus-gene-312.56-mRNA-1 | Japonica | NA       |               | Os01g0731100 | OsR498G0101940200.01.T01 | Pathogenesis-related family protein isoform 1                              |
| maker-1-augustus-gene-312.58-mRNA-1 | Japonica | Indica   |               | Os01g0731100 | OsR498G0101941200.01.T01 | Pathogenesis-related family protein isoform 1                              |
| maker-1-augustus-gene-312.60-mRNA-1 | Japonica | NA       |               | Os01g0731800 | OsR498G0101941400.01.T01 | RING-CH-type domain-containing protein (Fragment)                          |
| maker-1-augustus-gene-313.13-mRNA-1 | Japonica | Japonica |               | Os01g0735500 | OsR498G0101951500.01.T01 | Glycosyltransferase                                                        |
| maker-1-augustus-gene-313.14-mRNA-1 | Japonica | NA       |               | Os01g0733600 | OsR498G0101947200.01.T02 | NADPH-dependent diflavin oxidoreductase 1                                  |
| maker-1-augustus-gene-313.2-mRNA-1  | Japonica | NA       |               | Os01g0734000 | OsR498G0101947500.01.T01 | WRKY transcription factor 24                                               |
| maker-1-augustus-gene-313.21-mRNA-1 | Japonica | Indica   |               | Os06g0279950 | OsR498G0101949000.01.T01 |                                                                            |
| maker-1-augustus-gene-313.4-mRNA-1  | Japonica | NA       |               | Os01g0734200 | OsR498G0101948700.01.T02 | Respiratory burst oxidase protein B                                        |
| maker-1-augustus-gene-314.0-mRNA-1  | Japonica | Indica   |               | Os10g0560900 | OsR498G0101954300.01.T01 | Serine C-palmitoyltransferase                                              |
| maker-1-augustus-gene-314.11-mRNA-1 | Japonica | NA       |               |              | OsR498G0101957100.01.T01 | Bifunctional polynucleotide phosphatase/kinase                             |
| maker-1-augustus-gene-314.18-mRNA-1 | Japonica | Indica   |               | Os01g0737500 | OsR498G0101957300.01.T01 | Aluminum-activated malate transporter                                      |
| maker-1-augustus-gene-314.21-mRNA-1 | Japonica | NA       |               | Os01g0737900 | OsR498G0101958100.01.T01 | Pentatricopeptide repeat-containing protein, mitochondrial                 |
| maker-1-augustus-gene-314.23-mRNA-1 | Japonica | NA       |               | Os01g0737800 | OsR498G0101958000.01.T02 | CAAX farnesyltransferase subunit beta                                      |
| maker-1-augustus-gene-314.8-mRNA-1  | Japonica | NA       |               | Os01g0736900 | OsR498G0101956100.01.T03 | Reticulon-like protein (Fragment)                                          |
| maker-1-augustus-gene-315.34-mRNA-1 | Japonica | NA       |               | Os01g0738000 | OsR498G0101958300.01.T01 | Pentatricopeptide repeat-containing protein                                |
| maker-1-augustus-gene-315.36-mRNA-1 | Japonica | NA       | Kinase-TM     | Os01g0738300 | OsR498G0101960100.01.T01 | Proline-rich receptor-like protein kinase PERK10 isoform A                 |
| maker-1-augustus-gene-315.40-mRNA-1 | Japonica | NA       |               | Os01g0531200 | OsR498G0101960700.01.T03 | PMD domain-containing protein                                              |
| maker-1-augustus-gene-315.42-mRNA-1 | Japonica | NA       |               | Os01g0738600 | OsR498G0101960900.01.T03 | Clathrin interactor EPSIN 1                                                |
| maker-1-augustus-gene-315.48-mRNA-1 | Japonica | NA       |               | Os01g0739200 | OsR498G0101963300.01.T01 | Dual specificity protein phosphatase DSP8                                  |
| maker-1-augustus-gene-315.52-mRNA-1 | Japonica | NA       |               |              | OsR498G0101958800.01.T01 | Ubiquitin-like-specific protease 1D                                        |
| maker-1-augustus-gene-315.55-mRNA-1 | Japonica | Indica   |               | Os05g0524400 | OsR498G0101961400.01.T03 | ATP-dependent 6-phosphofructokinase                                        |
| maker-1-augustus-gene-315.61-mRNA-1 | Japonica | NA       |               | Os01g0289900 |                          | Rosmarinic acid synthase                                                   |
| maker-1-augustus-gene-315.63-mRNA-1 | Japonica | NA       |               | Os01g0739000 | OsR498G0101962600.01.T01 | Mitochondrial-processing peptidase subunit alpha                           |
| maker-1-augustus-gene-316.0-mRNA-1  | Japonica | NA       |               |              | OsR498G0101964500.01.T01 | Haloacid dehalogenase-like hydrolase-like                                  |
| maker-1-augustus-gene-316.13-mRNA-1 | Japonica | NA       |               | Os01g0739500 | OsR498G0101964800.01.T01 | Oxidative stress 3                                                         |
| maker-1-augustus-gene-316.15-mRNA-1 | Japonica | NA       |               | Os01g0740500 |                          | Glutamate carboxypeptidase 2                                               |
| maker-1-augustus-gene-316.19-mRNA-1 | Japonica | Indica   |               | Os01g0743300 | OsR498G0101968800.01.T01 | Glutamate carboxypeptidase 2                                               |
| maker-1-augustus-gene-316.24-mRNA-1 | Japonica | NA       | Kinase-TM     | Os01g0741200 | OsR498G0101969600.01.T01 | Putative serine/threonine-protein kinase RLCKVII                           |
| maker-1-augustus-gene-316.5-mRNA-1  | Japonica | NA       |               | Os01g0739700 | OsR498G0101966500.01.T01 | Glucan endo-1,3-beta-D-glucosidase                                         |
| maker-1-augustus-gene-316.7-mRNA-1  | Japonica | Indica   |               | Os01g0740400 | OsR498G0101967900.01.T01 | Formin-like protein 18                                                     |
| maker-1-augustus-gene-316.9-mRNA-1  | Japonica | NA       |               | Os01g0741900 | OsR498G0101971900.01.T04 | Auxin-responsive protein IAA6                                              |
| maker-1-augustus-gene-317.33-mRNA-1 | Japonica | NA       |               | Os01g0742200 | OsR498G0101972900.01.T02 | Tr-type G domain-containing protein                                        |
| maker-1-augustus-gene-317.35-mRNA-1 | Japonica | NA       | Kinase-LRR-TM | Os01g0742400 | OsR498G0101973900.01.T01 | Protein kinase family protein with leucine-rich repeat domain              |
| maker-1-augustus-gene-317.37-mRNA-1 | Japonica | Indica   |               | Os01g0743100 | OsR498G0101975300.01.T01 | IQ-domain 25                                                               |
| maker-1-augustus-gene-317.39-mRNA-1 | Japonica | NA       |               | Os01g0743300 | OsR498G0101976900.01.T03 | Protease-associated domain                                                 |
| maker-1-augustus-gene-317.44-mRNA-1 | Japonica | NA       |               | Os01g0743500 | OsR498G0101977300.01.T01 | NADP-dependent malic enzyme                                                |
| maker-1-augustus-gene-317.48-mRNA-1 | Japonica | NA       |               | Os01g0742500 | OsR498G0101974200.01.T01 | Phosphotransferase                                                         |
| maker-1-augustus-gene-317.53-mRNA-1 | Japonica | NA       |               | Os01g0743200 | OsR498G0101976000.01.T01 | Pectinesterase                                                             |
| maker-1-augustus-gene-317.57-mRNA-1 | Japonica | NA       |               | Os01g0743400 | OsR498G0101977200.01.T03 | Tryptophanyl-tRNA synthetase                                               |
| maker-1-augustus-gene-318.0-mRNA-1  | Japonica | Japonica |               | Os01g0743800 | OsR498G0101978300.01.T01 | Pseudo histidine-containing phosphotransfer protein 1                      |
| maker-1-augustus-gene-318.10-mRNA-1 | Japonica | NA       |               | Os01g0744200 | OsR498G0101979100.01.T01 | Downstream target of AGL15-4                                               |
| maker-1-augustus-gene-318.14-mRNA-1 | Japonica | NA       |               | Os01g0743600 | OsR498G0101977600.01.T03 | Lon N-terminal domain-containing protein                                   |
| maker-1-augustus-gene-318.19-mRNA-1 | Japonica | NA       |               | Os01g0744300 | OsR498G0101979400.01.T04 | Casein kinase I-like protein 2                                             |
| maker-1-augustus-gene-318.26-mRNA-1 | Japonica | NA       |               | Os01g0744400 | OsR498G0101979800.01.T03 | Golgin candidate 1                                                         |
| maker-1-augustus-gene-318.3-mRNA-1  | Japonica | NA       |               | Os01g0744000 | OsR498G0101978700.01.T04 | p-loop nucleoside triphosphate hydrolase superfamily protein with CH (Calp |
| maker-1-augustus-gene-318.33-mRNA-1 | Japonica | Indica   |               | Os01g0200200 | OsR498G0101980400.01.T01 |                                                                            |
| maker-1-augustus-gene-318.35-mRNA-1 | Japonica | NA       |               | Os01g0745700 | OsR498G0101982800.01.T02 | GATA transcription factor                                                  |
| maker-1-augustus-gene-319.32-mRNA-1 | Japonica | NA       |               |              |                          | Nuclear pore complex protein Nup85                                         |
| maker-1-augustus-gene-319.37-mRNA-1 | Japonica | Indica   |               | Os01g0747300 | OsR498G0101986700.01.T01 | Plant-specific domain TIGR01615 family protein expressed                   |
| maker-1-augustus-gene-319.40-mRNA-1 | Japonica | NA       |               | Os01g0746400 | OsR498G0101984600.01.T01 | Carotenoid cleavage dioxygenase                                            |
| maker-1-augustus-gene-319.42-mRNA-1 | Japonica | NA       |               | Os01g0746700 | OsR498G0101985200.01.T01 | Mannan endo-1,4-beta-mannosidase                                           |

|                                     |          |          |           |              |                          |                                                                |
|-------------------------------------|----------|----------|-----------|--------------|--------------------------|----------------------------------------------------------------|
| maker-1-augustus-gene-319.46-mRNA-1 | Japonica | NA       | Kinase-TM | Os01g0747400 | OsR498G0101987200.01.T01 | Serine/threonine-protein kinase HT1                            |
| maker-1-augustus-gene-320.0-mRNA-1  | Japonica | NA       |           | Os01g0747500 | OsR498G0101987900.01.T06 | Dihydroorotase                                                 |
| maker-1-augustus-gene-320.10-mRNA-1 | Japonica | NA       |           | Os01g0748900 | OsR498G0101993100.01.T02 | MACPF domain-containing protein CAD1                           |
| maker-1-augustus-gene-320.14-mRNA-1 | Japonica | NA       |           |              | OsR498G0101993300.01.T01 | Proton-dependent oligopeptide transporter                      |
| maker-1-augustus-gene-320.16-mRNA-1 | Japonica | Indica   |           | Os01g0749000 | OsR498G0101993500.01.T01 | Oil body-associated protein 2A                                 |
| maker-1-augustus-gene-320.18-mRNA-1 | Japonica | NA       |           |              | OsR498G0101993700.01.T01 | Forkhead box protein like                                      |
| maker-1-augustus-gene-320.22-mRNA-1 | Japonica | NA       |           | Os01g0749200 | OsR498G0101994100.01.T01 | 50S ribosomal protein L13 chloroplastic                        |
| maker-1-augustus-gene-320.26-mRNA-1 | Japonica | NA       |           | Os01g0749300 | OsR498G0101994300.01.T01 | Heat shock responsive transcription factor                     |
| maker-1-augustus-gene-320.29-mRNA-1 | Japonica | NA       |           |              |                          | Dynamin-related protein 5A isoform A                           |
| maker-1-augustus-gene-320.3-mRNA-1  | Japonica | NA       |           | Os01g0747700 |                          | S4 RNA-binding domain-containing protein (Fragment)            |
| maker-1-augustus-gene-320.32-mRNA-1 | Japonica | NA       |           | Os01g0748150 | OsR498G0101990200.01.T01 | Phytoecyanin domain-containing protein                         |
| maker-1-augustus-gene-320.34-mRNA-1 | Japonica | NA       |           |              | OsR498G0101992000.01.T02 | Dual specificity protein kinase splA                           |
| maker-1-augustus-gene-320.40-mRNA-1 | Japonica | NA       |           | Os01g0749400 | OsR498G0101994600.01.T02 | Trehalose-phosphatase                                          |
| maker-1-augustus-gene-320.5-mRNA-1  | Japonica | Indica   |           | Os05g0518300 | OsR498G0101991700.01.T01 | GDSL esterase/lipase                                           |
| maker-1-augustus-gene-320.8-mRNA-1  | Japonica | NA       |           | Os01g0748800 | OsR498G0101992300.01.T01 | Phosphatidylethanolamine-binding protein                       |
| maker-1-augustus-gene-321.0-mRNA-1  | Japonica | NA       |           | Os01g0749900 | OsR498G0101996500.01.T01 | Putative sugar phosphate/phosphate translocator                |
| maker-1-augustus-gene-321.10-mRNA-1 | Japonica | NA       |           | Os01g0750300 | OsR498G0101999100.01.T02 | Cellulose synthase A catalytic subunit 4                       |
| maker-1-augustus-gene-321.14-mRNA-1 | Japonica | NA       |           |              | OsR498G0101997600.01.T01 | WRKY transcription factor 5                                    |
| maker-1-augustus-gene-321.16-mRNA-1 | Japonica | NA       |           | Os01g0750500 | OsR498G0102001400.01.T01 | Coiled-coil domain-containing protein 25                       |
| maker-1-augustus-gene-321.19-mRNA-1 | Japonica | NA       | Kinase-TM | Os01g0750600 | OsR498G0102002200.01.T01 | proline-rich receptor-like protein kinase PERK5                |
| maker-1-augustus-gene-321.8-mRNA-1  | Japonica | NA       |           | Os01g0750000 | OsR498G0101997100.01.T01 | Ras-related protein RIC2                                       |
| maker-1-augustus-gene-322.0-mRNA-1  | Japonica | NA       |           | Os01g0751300 | OsR498G0102004500.01.T02 | Tobamovirus multiplication protein 1                           |
| maker-1-augustus-gene-322.11-mRNA-1 | Japonica | NA       |           | Os01g0752700 | OsR498G0102008100.01.T01 | Elongation factor family protein isoform 1                     |
| maker-1-augustus-gene-322.17-mRNA-1 | Japonica | NA       |           | Os01g0751600 | OsR498G0102005200.01.T01 | Fungal lipase-like domain containing protein                   |
| maker-1-augustus-gene-322.19-mRNA-1 | Japonica | NA       |           | Os01g0752200 | OsR498G0102006800.01.T01 | 3-hydroxyisobutryl-CoA hydrolase-like protein 5                |
| maker-1-augustus-gene-322.23-mRNA-1 | Japonica | NA       |           | Os01g0752300 | OsR498G0102007200.01.T01 | Urease accessory protein G                                     |
| maker-1-augustus-gene-322.26-mRNA-1 | Japonica | NA       |           | Os01g0752400 | OsR498G0102007400.01.T02 | PRKCSH-like domain-containing protein                          |
| maker-1-augustus-gene-322.30-mRNA-1 | Japonica | NA       |           | Os01g0752600 | OsR498G0102008000.01.T04 | Lipid-A-disaccharide synthase                                  |
| maker-1-augustus-gene-322.8-mRNA-1  | Japonica | NA       |           | Os01g0752100 | OsR498G0102006500.01.T01 | FBD domain-containing protein                                  |
| maker-1-augustus-gene-323.40-mRNA-1 | Japonica | NA       |           | Os01g0753100 | OsR498G0102009100.01.T01 | reticulon-4-interacting protein 1, mitochondrial isoform X1    |
| maker-1-augustus-gene-323.44-mRNA-1 | Japonica | NA       |           |              | OsR498G0102009900.01.T01 | trans-resveratrol di-O-methyltransferase-like isoform X2       |
| maker-1-augustus-gene-323.46-mRNA-1 | Japonica | NA       |           |              | OsR498G0102010300.01.T01 | Protein kinase domain-containing protein                       |
| maker-1-augustus-gene-323.48-mRNA-1 | Japonica | NA       |           | Os01g0754000 | OsR498G0102011100.01.T06 | Protein NUCLEAR FUSION DEFECTIVE 6 chloroplastic/mitochondrial |
| maker-1-augustus-gene-323.50-mRNA-1 | Japonica | NA       |           | Os01g0752800 | OsR498G0102008400.01.T02 | Casein kinase substrate, phosphoprotein PP28                   |
| maker-1-augustus-gene-323.54-mRNA-1 | Japonica | Indica   |           | Os05g0515700 | OsR498G0102009000.01.T03 | Transcription factor VOZ1                                      |
| maker-1-augustus-gene-323.56-mRNA-1 | Japonica | NA       |           | Os01g0753150 | OsR498G0102009600.01.T01 | optic atrophy 3 protein homolog                                |
| maker-1-augustus-gene-323.58-mRNA-1 | Japonica | Indica   |           | Os02g0788500 | OsR498G0102009800.01.T01 | F-box protein SKIP8                                            |
| maker-1-augustus-gene-323.60-mRNA-1 | Japonica | Indica   |           | Os01g0753500 | OsR498G0102010200.01.T02 | Auxin response factor                                          |
| maker-1-augustus-gene-323.66-mRNA-1 | Japonica | NA       |           | Os01g0754100 | OsR498G0102011400.01.T01 | Integrator complex subunit 9-like protein                      |
| maker-1-augustus-gene-323.68-mRNA-1 | Japonica | NA       |           | Os01g0754500 | OsR498G0102012200.01.T02 | Structural constituent of cell wall protein, putative          |
| maker-1-augustus-gene-324.0-mRNA-1  | Japonica | NA       |           | Os01g0755500 | OsR498G0102014300.01.T01 | transcription factor PCF5                                      |
| maker-1-augustus-gene-324.10-mRNA-1 | Japonica | NA       |           | Os01g0756700 | OsR498G0102018500.01.T01 | Voltage dependent potassium channel                            |
| maker-1-augustus-gene-324.12-mRNA-1 | Japonica | NA       |           | Os01g0755100 | OsR498G0102013800.01.T03 |                                                                |
| maker-1-augustus-gene-324.18-mRNA-1 | Japonica | NA       |           |              | OsR498G0102017200.01.T01 | HTH La-type RNA-binding domain-containing protein              |
| maker-1-augustus-gene-324.2-mRNA-1  | Japonica | NA       |           | Os01g0756200 | OsR498G0102016300.01.T01 | Basic leucine zipper 6                                         |
| maker-1-augustus-gene-324.6-mRNA-1  | Japonica | Japonica |           | Os01g0531400 | OsR498G0102017700.01.T01 | Putative Galactose-binding domain-containing protein           |
| maker-1-augustus-gene-325.0-mRNA-1  | Japonica | NA       |           | Os01g0757200 | OsR498G0102021500.01.T01 | Gibberellin 2-beta-dioxygenase                                 |
| maker-1-augustus-gene-325.15-mRNA-1 | Japonica | NA       |           | Os01g0757500 | OsR498G0102022800.01.T01 | Calcyclin-binding protein (Fragment)                           |
| maker-1-augustus-gene-325.2-mRNA-1  | Japonica | NA       | NBS       | Os01g0757400 | OsR498G0102022500.01.T02 | AAA domain-containing protein (Fragment)                       |
| maker-1-augustus-gene-325.26-mRNA-1 | Japonica | NA       |           |              | OsR498G0102025400.01.T04 | Bifunctional riboflavin kinasefmn phosphatase                  |
| maker-1-augustus-gene-325.32-mRNA-1 | Japonica | NA       |           | Os01g0758000 | OsR498G0102025600.01.T01 | Heavy metal-associated isoprenylated plant protein 26          |
| maker-1-augustus-gene-325.34-mRNA-1 | Japonica | Indica   |           | Os01g0758300 | OsR498G0102028800.01.T01 | Phosphoenolpyruvate carboxylase, housekeeping isozyme          |
| maker-1-augustus-gene-325.38-mRNA-1 | Japonica | Indica   |           | Os01g0758400 | OsR498G0102029400.01.T05 | Phosphatidate cytidyltransferase                               |
| maker-1-augustus-gene-325.9-mRNA-1  | Japonica | Indica   |           | Os01g0757800 | OsR498G0102025100.01.T01 | UmuC domain-containing protein                                 |
| maker-1-augustus-gene-326.32-mRNA-1 | Japonica | NA       |           | Os01g0758900 | OsR498G0102034300.01.T01 | F-box domain-containing protein                                |
| maker-1-augustus-gene-326.34-mRNA-1 | Japonica | NA       |           | Os01g0759000 | OsR498G0102034900.01.T01 |                                                                |
| maker-1-augustus-gene-326.36-mRNA-1 | Japonica | Indica   |           | Os01g0759700 | OsR498G0102038300.01.T02 | Transcriptional regulator family protein-like                  |
| maker-1-augustus-gene-326.40-mRNA-1 | Japonica | Indica   |           | Os01g0759900 | OsR498G0102038700.01.T02 | Nucleobase-ascorbate transporter like                          |
| maker-1-augustus-gene-326.48-mRNA-1 | Japonica | Japonica |           | Os01g0759100 | OsR498G0102035200.01.T02 | Tubby-like F-box protein 1                                     |
| maker-1-augustus-gene-327.48-mRNA-1 | Japonica | NA       |           |              |                          | Putative acyl-activating enzyme                                |
| maker-1-augustus-gene-327.52-mRNA-1 | Japonica | NA       |           | Os01g0761900 | OsR498G0102043900.01.T01 | RING-type E3 ubiquitin transferase                             |

|                                     |          |          |  |              |                          |                                                              |
|-------------------------------------|----------|----------|--|--------------|--------------------------|--------------------------------------------------------------|
| maker-1-augustus-gene-327.54-mRNA-1 | Japonica | NA       |  | Os01g0762500 | OsR498G0102044500.01.T01 | Glutelin type-A 1                                            |
| maker-1-augustus-gene-327.62-mRNA-1 | Japonica | NA       |  |              | OsR498G0102040600.01.T01 | Homeobox-leucine zipper protein ROC9                         |
| maker-1-augustus-gene-327.65-mRNA-1 | Japonica | NA       |  | Os01g0760900 | OsR498G0102040800.01.T01 | Probable protein ABIL5                                       |
| maker-1-augustus-gene-327.69-mRNA-1 | Japonica | NA       |  | Os01g0761100 | OsR498G0102041200.01.T01 | CRC domain                                                   |
| maker-1-augustus-gene-327.72-mRNA-1 | Japonica | NA       |  | Os01g0761400 | OsR498G0102042000.01.T02 | Peptide/nitrate transporter plant                            |
| maker-1-augustus-gene-327.75-mRNA-1 | Japonica | NA       |  | Os01g0761500 | OsR498G0102042600.01.T01 | Putative Nitrate transporter                                 |
| maker-1-augustus-gene-327.77-mRNA-1 | Japonica | NA       |  | Os01g0762000 | OsR498G0102044200.01.T01 | Sugar-dependent1                                             |
| maker-1-augustus-gene-327.79-mRNA-1 | Japonica | NA       |  | Os01g0762300 | OsR498G0102044400.01.T01 | Putative 54S ribosomal protein L32, mitochondrial (Fragment) |
| maker-1-augustus-gene-328.0-mRNA-1  | Japonica | Japonica |  | Os01g0763100 | OsR498G0102045300.01.T04 | RHOMBOLD-like protein 12 mitochondrial                       |
| maker-1-augustus-gene-328.13-mRNA-1 | Japonica | Indica   |  | Os07g0694800 | OsR498G0102049700.01.T01 | DUF155 domain-containing protein                             |
| maker-1-augustus-gene-328.18-mRNA-1 | Japonica | Japonica |  | Os01g0762600 | OsR498G0102044400.01.T06 | FCP1 homology domain-containing protein (Fragment)           |
| maker-1-augustus-gene-328.21-mRNA-1 | Japonica | NA       |  | Os01g0763000 | OsR498G0102045200.01.T01 |                                                              |
| maker-1-augustus-gene-328.25-mRNA-1 | Japonica | NA       |  |              | OsR498G0102047800.01.T01 | X8 domain-containing protein                                 |
| maker-1-augustus-gene-328.27-mRNA-1 | Japonica | NA       |  | Os01g0763900 | OsR498G0102048000.01.T02 | X8 domain-containing protein                                 |
| maker-1-augustus-gene-328.30-mRNA-1 | Japonica | NA       |  | Os01g0764000 | OsR498G0102048200.01.T01 | Glutathione transferase                                      |
| maker-1-augustus-gene-328.32-mRNA-1 | Japonica | NA       |  | Os01g0764400 | OsR498G0102050000.01.T01 | Chorismate mutase                                            |
| maker-1-augustus-gene-328.6-mRNA-1  | Japonica | NA       |  | Os01g0763600 | OsR498G0102047300.01.T01 | Glycerophosphodiester phosphodiesterase                      |
| maker-1-augustus-gene-329.0-mRNA-1  | Japonica | NA       |  | Os01g0764700 | OsR498G0102050900.01.T05 | YqgFc domain-containing protein                              |
| maker-1-augustus-gene-329.11-mRNA-1 | Japonica | NA       |  | Os08g0172200 | OsR498G0815291700.01.T04 | UvrB/uvrC motif-containing protein                           |
| maker-1-augustus-gene-329.16-mRNA-1 | Japonica | NA       |  | Os01g0764600 | OsR498G0102050800.01.T02 | Isopentenyl phosphate kinase                                 |
| maker-1-augustus-gene-329.22-mRNA-1 | Japonica | NA       |  | Os01g0764900 |                          | Pentatricopeptide (PPR) repeat protein-like                  |
| maker-1-augustus-gene-329.24-mRNA-1 | Japonica | NA       |  |              | OsR498G0102052400.01.T03 | Deoxycytidylate deaminase                                    |
| maker-1-augustus-gene-329.25-mRNA-1 | Japonica | NA       |  | Os01g0765000 | OsR498G0102052400.01.T01 | Deoxycytidylate deaminase                                    |
| maker-1-augustus-gene-329.3-mRNA-1  | Japonica | NA       |  | Os01g0764800 | OsR498G0102051900.01.T01 | Indole-3-acetic acid-amido synthetase                        |
| maker-1-augustus-gene-329.32-mRNA-1 | Japonica | NA       |  | Os01g0765400 | OsR498G0102053200.01.T01 | Serpin (Serine protease inhibitor)                           |
| maker-1-augustus-gene-329.34-mRNA-1 | Japonica | NA       |  | Os01g0765500 | OsR498G0102053400.01.T01 |                                                              |
| maker-1-augustus-gene-329.36-mRNA-1 | Japonica | Japonica |  | Os01g0766000 | OsR498G0102054000.01.T01 | Protein DETOXIFICATION                                       |
| maker-1-augustus-gene-329.6-mRNA-1  | Japonica | NA       |  |              | OsR498G0102052700.01.T02 | Nucleic acid binding                                         |
| maker-1-augustus-gene-330.0-mRNA-1  | Japonica | NA       |  | Os01g0766400 | OsR498G0102055700.01.T01 |                                                              |
| maker-1-augustus-gene-330.12-mRNA-1 | Japonica | NA       |  | Os01g0767900 | OsR498G0102060100.01.T03 | Regulatory protein NPR3                                      |
| maker-1-augustus-gene-330.16-mRNA-1 | Japonica | Indica   |  | Os03g0770800 | OsR498G0102057400.01.T01 | Probable xyloglucan glycosyltransferase 1                    |
| maker-1-augustus-gene-330.19-mRNA-1 | Japonica | NA       |  | Os01g0767000 | OsR498G0102058400.01.T01 | Branched-chain-amino-acid aminotransferase 5 chloroplastic   |
| maker-1-augustus-gene-330.23-mRNA-1 | Japonica | NA       |  | Os01g0767100 | OsR498G0102058600.01.T02 | Lysosomal Pro-X carboxypeptidase                             |
| maker-1-augustus-gene-330.3-mRNA-1  | Japonica | NA       |  | Os01g0766600 | OsR498G0102055900.01.T01 | BSD domain-containing protein                                |
| maker-1-augustus-gene-330.5-mRNA-1  | Japonica | NA       |  | Os01g0767600 | OsR498G0102058900.01.T01 | DNA-directed RNA polymerase subunit beta                     |
| maker-1-augustus-gene-330.7-mRNA-1  | Japonica | NA       |  | Os01g0767700 | OsR498G0102059100.01.T04 | RNA helicase                                                 |
| maker-1-augustus-gene-331.0-mRNA-1  | Japonica | NA       |  |              | OsR498G0102061700.01.T02 | Maternal effect embryo arrest 22                             |
| maker-1-augustus-gene-331.15-mRNA-1 | Japonica | NA       |  | Os01g0769100 | OsR498G0102062700.01.T02 | Lipoyl synthase, chloroplastic                               |
| maker-1-augustus-gene-331.20-mRNA-1 | Japonica | NA       |  | Os01g0769200 | OsR498G0102064100.01.T01 | Subtilisin-like protease                                     |
| maker-1-augustus-gene-331.22-mRNA-1 | Japonica | NA       |  | Os01g0769900 | OsR498G0102064700.01.T04 | Plastid transcriptionally active 12                          |
| maker-1-augustus-gene-331.26-mRNA-1 | Japonica | Indica   |  | Os01g0768200 | OsR498G0102060800.01.T03 | TLC domain-containing protein                                |
| maker-1-augustus-gene-331.31-mRNA-1 | Japonica | NA       |  |              | OsR498G0102061000.01.T01 | TLC domain-containing protein                                |
| maker-1-augustus-gene-331.34-mRNA-1 | Japonica | NA       |  | Os01g0768400 |                          | HGWP repeat containing protein-like                          |
| maker-1-augustus-gene-332.32-mRNA-1 | Japonica | NA       |  | Os01g0771200 | OsR498G0102068700.01.T01 | Mal d 1-associated protein                                   |
| maker-1-augustus-gene-332.34-mRNA-1 | Japonica | NA       |  | Os01g0770000 | OsR498G0102065000.01.T01 | Diacylglycerol O-acyltransferase                             |
| maker-1-augustus-gene-332.35-mRNA-1 | Japonica | NA       |  | Os01g0770100 |                          | Diacylglycerol O-acyltransferase                             |
| maker-1-augustus-gene-332.48-mRNA-1 | Japonica | NA       |  | Os01g0770500 | OsR498G0102066600.01.T01 | ATP-binding ABC transporter                                  |
| maker-1-augustus-gene-332.50-mRNA-1 | Japonica | NA       |  | Os01g0771100 | OsR498G0102068600.01.T01 | Mitochondrial acidic protein mam33                           |
| maker-1-augustus-gene-332.52-mRNA-1 | Japonica | NA       |  |              | OsR498G0102070400.01.T02 | Ubiquitinyl hydrolase 1                                      |
| maker-1-augustus-gene-333.32-mRNA-1 | Japonica | NA       |  | Os01g0772600 | OsR498G0102073700.01.T02 | Casein kinase                                                |
| maker-1-augustus-gene-333.40-mRNA-1 | Japonica | NA       |  |              | OsR498G0102074100.01.T03 | ARM repeat superfamily protein                               |
| maker-1-augustus-gene-333.46-mRNA-1 | Japonica | NA       |  | Os01g0772800 | OsR498G0102074300.01.T01 | Signal recognition particle 54 kDa protein                   |
| maker-1-augustus-gene-333.51-mRNA-1 | Japonica | NA       |  | Os01g0773100 | OsR498G0102075300.01.T02 | Dymeclin                                                     |
| maker-1-augustus-gene-333.56-mRNA-1 | Japonica | NA       |  | Os01g0771900 | OsR498G0102070800.01.T06 | lysosomal beta glucosidase-like isoform X2                   |
| maker-1-augustus-gene-333.61-mRNA-1 | Japonica | NA       |  |              | OsR498G0102071200.01.T01 | Double-stranded RNA-binding protein 1                        |
| maker-1-augustus-gene-333.64-mRNA-1 | Japonica | Indica   |  | Os01g0772100 | OsR498G0102071600.01.T01 | LOB domain-containing protein 4                              |
| maker-1-augustus-gene-333.67-mRNA-1 | Japonica | Indica   |  | Os01g0772150 | OsR498G0102071800.01.T01 | Histone-lysine N-methyltransferase SUV3                      |
| maker-1-augustus-gene-333.71-mRNA-1 | Japonica | NA       |  | Os01g0772500 | OsR498G0102073000.01.T01 | Beta-glucuronosyltransferase GlcAT14A                        |
| maker-1-augustus-gene-333.73-mRNA-1 | Japonica | NA       |  | Os01g0772900 | OsR498G0102074800.01.T02 | Homocysteine S-methyltransferase 4                           |
| maker-1-augustus-gene-333.80-mRNA-1 | Japonica | NA       |  |              | OsR498G0102075000.01.T01 | TRUD domain-containing protein (Fragment)                    |
| maker-1-augustus-gene-333.82-mRNA-1 | Japonica | NA       |  |              |                          | jmiC domain-containing protein C isoform X2                  |



|                                     |          |          |           |              |                          |                                                                            |
|-------------------------------------|----------|----------|-----------|--------------|--------------------------|----------------------------------------------------------------------------|
| maker-1-augustus-gene-334.0-mRNA-1  | Japonica | NA       |           |              | OsR498G0102076700.01.T01 |                                                                            |
| maker-1-augustus-gene-334.10-mRNA-1 | Japonica | NA       |           |              |                          | FBD domain-containing protein                                              |
| maker-1-augustus-gene-334.12-mRNA-1 | Japonica | NA       |           | Os01g0775200 | OsR498G0102082700.01.T01 | GTD-binding domain-containing protein (Fragment)                           |
| maker-1-augustus-gene-334.15-mRNA-1 | Japonica | NA       |           | Os01g0773700 | OsR498G0102077400.01.T01 | Photosystem II reaction center W protein, chloroplastic                    |
| maker-1-augustus-gene-334.17-mRNA-1 | Japonica | Japonica |           | Os01g0774500 | OsR498G0102081600.01.T01 | p-loop containing nucleoside triphosphate hydrolase superfamily protein    |
| maker-1-augustus-gene-334.2-mRNA-1  | Japonica | NA       |           | Os01g0773600 | OsR498G0102077100.01.T02 | alpha-1,2-Mannosidase                                                      |
| maker-1-augustus-gene-334.20-mRNA-1 | Japonica | Indica   |           | Os01g0775100 | OsR498G0102081800.01.T02 | Plus3 domain-containing protein                                            |
| maker-1-augustus-gene-334.8-mRNA-1  | Japonica | NA       |           | Os01g0773800 | OsR498G0102078100.01.T01 | BHLH domain-containing protein (Fragment)                                  |
| maker-1-augustus-gene-335.29-mRNA-1 | Japonica | NA       |           |              | OsR498G0102087900.01.T01 |                                                                            |
| maker-1-augustus-gene-335.31-mRNA-1 | Japonica | Indica   |           | Os01g0776500 | OsR498G0102088500.01.T02 | Superoxide dismutase                                                       |
| maker-1-augustus-gene-335.37-mRNA-1 | Japonica | NA       |           | Os01g0776800 | OsR498G0102089900.01.T01 | Nucleotide binding (Fragment)                                              |
| maker-1-augustus-gene-335.40-mRNA-1 | Japonica | NA       |           | Os01g0777000 | OsR498G0102090300.01.T03 | Conserved oligomeric Golgi complex subunit 1                               |
| maker-1-augustus-gene-335.45-mRNA-1 | Japonica | NA       |           | Os01g0775300 | OsR498G0102083400.01.T02 | Math domain containing protein (Fragment)                                  |
| maker-1-augustus-gene-335.50-mRNA-1 | Japonica | NA       |           | Os01g0775400 | OsR498G0102083800.01.T01 | Cytokinin dehydrogenase                                                    |
| maker-1-augustus-gene-335.53-mRNA-1 | Japonica | Indica   |           | Os01g0775500 | OsR498G0102085600.01.T01 | Mannose-binding lectin                                                     |
| maker-1-augustus-gene-335.56-mRNA-1 | Japonica | NA       |           | Os01g0775600 | OsR498G0102085800.01.T03 | LisH dimerization motif                                                    |
| maker-1-augustus-gene-335.60-mRNA-1 | Japonica | NA       |           |              | OsR498G0102088400.01.T03 | WD repeat-containing protein 13                                            |
| maker-1-augustus-gene-335.65-mRNA-1 | Japonica | NA       |           | Os01g0776600 | OsR498G0102089000.01.T01 | Purple acid phosphatase                                                    |
| maker-1-augustus-gene-335.68-mRNA-1 | Japonica | Indica   |           | Os01g0776700 | OsR498G0102089400.01.T01 |                                                                            |
| maker-1-augustus-gene-336.0-mRNA-1  | Japonica | Indica   |           | Os01g0776900 | OsR498G0102091500.01.T01 | Aspartic proteinase nepenthesin-2                                          |
| maker-1-augustus-gene-336.11-mRNA-1 | Japonica | NA       |           |              | OsR498G0102091900.01.T01 | RRM domain-containing protein (Fragment)                                   |
| maker-1-augustus-gene-336.13-mRNA-1 | Japonica | NA       |           | Os01g0777900 | OsR498G0102093100.01.T01 | Cysteine-rich transmembrane CYSTM domain containing protein                |
| maker-1-augustus-gene-336.18-mRNA-1 | Japonica | NA       |           | Os01g0778700 | OsR498G0102095500.01.T01 | Vacuole membrane protein KM51                                              |
| maker-1-augustus-gene-336.21-mRNA-1 | Japonica | NA       |           |              |                          | Insulin-degrading enzyme-like 1 peroxisomal                                |
| maker-1-augustus-gene-336.31-mRNA-1 | Japonica | Indica   |           | Os03g0689100 | OsR498G0102092400.01.T02 | Inositol hexakisphosphate and diphosphoinositol-pentakisphosphate kinase   |
| maker-1-augustus-gene-336.37-mRNA-1 | Japonica | NA       |           |              | OsR498G0102092800.01.T02 | Ultraviolet-B receptor like                                                |
| maker-1-augustus-gene-336.42-mRNA-1 | Japonica | Indica   |           | Os01g0778500 | OsR498G0102095000.01.T01 | Putative serine/threonine-protein kinase yzf                               |
| maker-1-augustus-gene-336.6-mRNA-1  | Japonica | NA       |           | Os01g0777300 | OsR498G0102091700.01.T01 | Exonuclease 1                                                              |
| maker-1-augustus-gene-337.36-mRNA-1 | Japonica | NA       |           |              |                          | Zinc-metallopeptidase, peroxisomal                                         |
| maker-1-augustus-gene-337.38-mRNA-1 | Japonica | NA       |           |              |                          | Katanin p80 WD40 repeat-containing subunit B1 homolog                      |
| maker-1-augustus-gene-337.44-mRNA-1 | Japonica | NA       |           | Os01g0780500 | OsR498G0102099700.01.T01 | Secretory carrier-associated membrane protein 2                            |
| maker-1-augustus-gene-337.50-mRNA-1 | Japonica | Indica   |           | Os01g0779400 | OsR498G0102097400.01.T02 | SNF2 domain-containing protein / helicase domain-containing protein / zinc |
| maker-1-augustus-gene-337.55-mRNA-1 | Japonica | Indica   |           | Os01g0780600 | OsR498G0102100000.01.T01 | Non-phototropic hypocotyl                                                  |
| maker-1-augustus-gene-337.58-mRNA-1 | Japonica | NA       |           | Os01g0780800 | OsR498G0102100200.01.T01 | SAND domain-containing protein                                             |
| maker-1-augustus-gene-338.0-mRNA-1  | Japonica | NA       |           |              | OsR498G0102108100.01.T01 | Ferroxidase                                                                |
| maker-1-augustus-gene-338.11-mRNA-1 | Japonica | NA       |           | Os01g0782700 | OsR498G0102105000.01.T01 | Cyclic nucleotide-gated ion channel 4                                      |
| maker-1-augustus-gene-338.12-mRNA-1 | Japonica | Japonica |           | Os01g0782700 | OsR498G0511120900.01.T03 | Cyclic nucleotide-gated ion channel 4                                      |
| maker-1-augustus-gene-338.17-mRNA-1 | Japonica | NA       |           | Os03g0207200 | OsR498G0305431600.01.T04 |                                                                            |
| maker-1-augustus-gene-338.19-mRNA-1 | Japonica | NA       |           |              | OsR498G0102105600.01.T01 | LysM domain-containing protein                                             |
| maker-1-augustus-gene-338.21-mRNA-1 | Japonica | NA       |           | Os01g0783200 | OsR498G0102107000.01.T01 | diacylglycerol kinase                                                      |
| maker-1-augustus-gene-338.27-mRNA-1 | Japonica | NA       |           |              | OsR498G0102107400.01.T01 | DRMBL domain-containing protein (Fragment)                                 |
| maker-1-augustus-gene-338.30-mRNA-1 | Japonica | NA       |           | Os01g0783500 | OsR498G0102107800.01.T01 | Usp domain-containing protein (Fragment)                                   |
| maker-1-augustus-gene-338.4-mRNA-1  | Japonica | NA       |           | Os01g0782200 | OsR498G0102103600.01.T02 | Sphingosine kinase                                                         |
| maker-1-augustus-gene-338.9-mRNA-1  | Japonica | NA       |           | Os01g0782500 | OsR498G0102103800.01.T03 | 1-acylglycerol-3-phosphate O-acyltransferase                               |
| maker-1-augustus-gene-339.39-mRNA-1 | Japonica | Japonica | Kinase-TM | Os01g0783800 | OsR498G0102108700.01.T06 | G-type lectin S-receptor-like serine/threonine-protein kinase              |
| maker-1-augustus-gene-339.42-mRNA-1 | Japonica | NA       | Kinase-TM |              |                          | Serine/threonine-protein kinase                                            |
| maker-1-augustus-gene-339.51-mRNA-1 | Japonica | Indica   |           | Os01g0784600 | OsR498G0102109900.01.T01 | Nodulation protein H                                                       |
| maker-1-augustus-gene-339.58-mRNA-1 | Japonica | NA       |           | Os01g0785400 | OsR498G0102114500.01.T01 | Indole-3-acetic acid amido synthetase                                      |
| maker-1-augustus-gene-339.61-mRNA-1 | Japonica | NA       | Kinase-TM | Os01g0784700 | OsR498G0102110200.01.T02 | Serine/threonine-protein kinase                                            |
| maker-1-augustus-gene-339.64-mRNA-1 | Japonica | NA       |           | Os01g0784900 | OsR498G0102111800.01.T01 | BHLH domain-containing protein (Fragment)                                  |
| maker-1-augustus-gene-340.0-mRNA-1  | Japonica | NA       |           | Os01g0787400 | OsR498G0102121700.01.T01 | Armadillo repeat-containing X-linked protein 2 (Fragment)                  |
| maker-1-augustus-gene-340.10-mRNA-1 | Japonica | Indica   |           | Os01g0786700 | OsR498G0102119200.01.T01 | Membrane protein-like                                                      |
| maker-1-augustus-gene-340.13-mRNA-1 | Japonica | NA       |           | Os01g0786800 | OsR498G0102119400.01.T01 | Membrane protein-like                                                      |
| maker-1-augustus-gene-340.16-mRNA-1 | Japonica | NA       |           | Os01g0786900 | OsR498G0102119600.01.T03 | BCAS3 domain-containing protein                                            |
| maker-1-augustus-gene-340.21-mRNA-1 | Japonica | NA       |           | Os01g0787000 | OsR498G0102120400.01.T01 | Peroxidase                                                                 |
| maker-1-augustus-gene-340.4-mRNA-1  | Japonica | NA       |           | Os01g0787600 | OsR498G0102122700.01.T01 | AB hydrolase-1 domain-containing protein (Fragment)                        |
| maker-1-augustus-gene-340.6-mRNA-1  | Japonica | NA       |           | Os01g0785900 | OsR498G0102116800.01.T01 | C2H2-type domain-containing protein (Fragment)                             |
| maker-1-augustus-gene-340.8-mRNA-1  | Japonica | Indica   |           | Os01g0786500 | OsR498G0102118600.01.T01 | Phytocyanin domain-containing protein (Fragment)                           |
| maker-1-augustus-gene-341.36-mRNA-1 | Japonica | NA       |           | Os01g0788200 | OsR498G0102124700.01.T01 | NTF2 domain-containing protein (Fragment)                                  |
| maker-1-augustus-gene-341.38-mRNA-1 | Japonica | NA       |           | Os01g0788400 | OsR498G0102125500.01.T01 | Pectinesterase                                                             |
| maker-1-augustus-gene-341.40-mRNA-1 | Japonica | NA       |           | Os01g0788800 | OsR498G0102126500.01.T01 | Homeodomain leucine zipper family IV protein                               |

|                                      |          |          |        |              |                          |                                                                             |
|--------------------------------------|----------|----------|--------|--------------|--------------------------|-----------------------------------------------------------------------------|
| maker-1-augustus-gene-341.44-mRNA-1  | Japonica | NA       | Kinase |              |                          | probable serine/threonine-protein kinase PBL23                              |
| maker-1-augustus-gene-341.46-mRNA-1  | Japonica | Indica   |        | Os03g0115200 | OsR498G0102127000.01.T01 | KH domain-containing protein (Fragment)                                     |
| maker-1-augustus-gene-341.48-mRNA-1  | Japonica | NA       |        | Os01g0789000 | OsR498G0102127200.01.T01 | F-box domain-containing protein (Fragment)                                  |
| maker-1-augustus-gene-341.51-mRNA-1  | Japonica | NA       |        | Os01g0789100 | OsR498G0102127400.01.T01 | CDP-diacylglycerol--glycerol-3-phosphate 3-phosphatidyltransferase 1, chlor |
| maker-1-augustus-gene-342.12-mRNA-1  | Japonica | NA       |        |              |                          |                                                                             |
| maker-1-augustus-gene-343.104-mRNA-1 | Japonica | NA       |        | Os01g0794500 | OsR498G0102132600.01.T02 | SUI1 domain-containing protein (Fragment)                                   |
| maker-1-augustus-gene-343.59-mRNA-1  | Japonica | NA       |        | Os01g0794400 | OsR498G0102132300.01.T02 | Probable nucleoredoxin 2                                                    |
| maker-1-augustus-gene-343.64-mRNA-1  | Japonica | NA       |        | Os01g0795000 | OsR498G0102133700.01.T02 | Subtilisin-like protease                                                    |
| maker-1-augustus-gene-343.75-mRNA-1  | Japonica | NA       |        | Os01g0795100 |                          | Subtilisin-like serine proteinase-like protein                              |
| maker-1-augustus-gene-343.84-mRNA-1  | Japonica | Indica   |        | Os01g0795200 | OsR498G0102134900.01.T06 | Subtilisin-like protease                                                    |
| maker-1-augustus-gene-343.93-mRNA-1  | Japonica | NA       |        |              | OsR498G0102129600.01.T02 | Inositol-1,4,5-trisphosphate 5-phosphatase 4 isoform 1                      |
| maker-1-augustus-gene-344.0-mRNA-1   | Japonica | NA       |        | Os01g0796400 | OsR498G0102139500.01.T01 | 3-hydroxybutyryl-CoA dehydrogenase                                          |
| maker-1-augustus-gene-344.10-mRNA-1  | Japonica | NA       |        | Os01g0796700 | OsR498G0102140600.01.T05 | Putative E3 ubiquitin-protein ligase RING1a                                 |
| maker-1-augustus-gene-344.11-mRNA-1  | Japonica | NA       |        | Os01g0796900 | OsR498G0102140600.01.T06 | RING-type domain-containing protein                                         |
| maker-1-augustus-gene-344.20-mRNA-1  | Japonica | NA       |        | Os01g0798200 |                          |                                                                             |
| maker-1-augustus-gene-344.21-mRNA-1  | Japonica | NA       |        |              |                          |                                                                             |
| maker-1-augustus-gene-344.3-mRNA-1   | Japonica | NA       |        | Os01g0798500 | OsR498G0102143900.01.T01 | Protein CHLOROPLAST ENHANCING STRESS TOLERANCE, chloroplastic               |
| maker-1-augustus-gene-344.6-mRNA-1   | Japonica | NA       |        |              | OsR498G0102139800.01.T01 | Haloacid dehalogenase superfamily protein                                   |
| maker-1-augustus-gene-345.35-mRNA-1  | Japonica | NA       |        | Os01g0799500 | OsR498G0102146300.01.T01 | probable GMP synthase [glutamine-hydrolyzing]                               |
| maker-1-augustus-gene-345.39-mRNA-1  | Japonica | NA       |        | Os01g0799900 | OsR498G0102147300.01.T01 | Metacaspase-5                                                               |
| maker-1-augustus-gene-345.41-mRNA-1  | Japonica | Japonica |        | Os01g0800266 | OsR498G0511102000.01.T04 | Phosphoglycerate kinase                                                     |
| maker-1-augustus-gene-345.43-mRNA-1  | Japonica | NA       |        | Os01g0800500 | OsR498G0102149100.01.T01 | Purple acid phosphatase                                                     |
| maker-1-augustus-gene-345.47-mRNA-1  | Japonica | NA       |        | Os01g0798800 | OsR498G0102144600.01.T01 | 1-phosphatidylinositol 4,5-bisphosphate phosphodiesterase beta-1            |
| maker-1-augustus-gene-346.0-mRNA-1   | Japonica | NA       |        | Os01g0801000 | OsR498G0102151700.01.T05 | DNA-(Apurinic or apyrimidinic site) lyase chloroplastic                     |
| maker-1-augustus-gene-346.12-mRNA-1  | Japonica | NA       |        | Os01g0801200 | OsR498G0102152400.01.T01 | DNA repair protein recA-like protein (Fragment)                             |
| maker-1-augustus-gene-346.14-mRNA-1  | Japonica | NA       |        | Os01g0801500 | OsR498G0102153200.01.T01 | Glucan endo-1,3-beta-glucosidase GVI                                        |
| maker-1-augustus-gene-346.16-mRNA-1  | Japonica | NA       |        | Os01g0801600 | OsR498G0102153400.01.T03 | Glycerol-3-phosphate dehydrogenase                                          |
| maker-1-augustus-gene-346.19-mRNA-1  | Japonica | NA       |        | Os01g0801700 | OsR498G0102153800.01.T02 | Protein GAMETE CELL DEFECTIVE 1, mitochondrial                              |
| maker-1-augustus-gene-346.21-mRNA-1  | Japonica | NA       |        | Os01g0802700 | OsR498G0102156000.01.T01 | Auxin efflux carrier component                                              |
| maker-1-augustus-gene-346.5-mRNA-1   | Japonica | NA       |        | Os01g0801100 | OsR498G0102152100.01.T03 | DNA-(apurinic or apyrimidinic site) endonuclease, chloroplastic             |
| maker-1-augustus-gene-346.7-mRNA-1   | Japonica | NA       |        | Os01g0802100 | OsR498G0102154900.01.T05 | 4-(cytidine-5'-diphospho)-2-C-methyl-D-erythritol kinase                    |
| maker-1-augustus-gene-347.50-mRNA-1  | Japonica | NA       |        | Os01g0803200 | OsR498G0102157700.01.T05 | Cysteine proteinase inhibitor                                               |
| maker-1-augustus-gene-347.52-mRNA-1  | Japonica | Indica   |        | Os01g0803300 | OsR498G0102159600.01.T01 | Auxin-induced protein 5NG4 (Fragment)                                       |
| maker-1-augustus-gene-348.0-mRNA-1   | Japonica | NA       |        | Os01g0805300 | OsR498G0102166300.01.T01 | PsbP domain-containing protein 6 chloroplastic                              |
| maker-1-augustus-gene-348.10-mRNA-1  | Japonica | Indica   |        | Os01g0805000 | OsR498G0102165600.01.T01 | 50S ribosomal protein L34 chloroplastic                                     |
| maker-1-augustus-gene-348.12-mRNA-1  | Japonica | NA       |        | Os01g0805200 | OsR498G0102166000.01.T01 | MAR-binding filament-like protein 1-1 isoform 2                             |
| maker-1-augustus-gene-348.14-mRNA-1  | Japonica | Indica   |        | Os01g0805600 | OsR498G0102167000.01.T01 | Cyclin laZm                                                                 |
| maker-1-augustus-gene-348.17-mRNA-1  | Japonica | NA       |        | Os01g0805700 | OsR498G0102167200.01.T01 | Stomatal closure-related actin-binding protein 1                            |
| maker-1-augustus-gene-348.2-mRNA-1   | Japonica | NA       |        | Os01g0805400 | OsR498G0102166500.01.T01 | UDP-glucosyltransferase                                                     |
| maker-1-augustus-gene-348.24-mRNA-1  | Japonica | NA       |        | Os01g0805800 | OsR498G0102167600.01.T01 | DNA-directed RNA polymerases II 24 kDa polypeptide                          |
| maker-1-augustus-gene-348.4-mRNA-1   | Japonica | Japonica |        | Os01g0805500 | OsR498G0102166700.01.T02 | Indole-3-acetate beta-glucosyltransferase                                   |
| maker-1-augustus-gene-36.40-mRNA-1   | Japonica | NA       |        | Os01g0170600 |                          | Usp domain-containing protein (Fragment)                                    |
| maker-1-augustus-gene-36.42-mRNA-1   | Japonica | NA       |        | Os01g0170700 | OsR498G0100237500.01.T01 |                                                                             |
| maker-1-augustus-gene-37.2-mRNA-1    | Japonica | NA       |        | Os01g0172100 | OsR498G0100242100.01.T02 | Phosphoenolpyruvate/phosphate translocator 2 chloroplastic                  |
| maker-1-augustus-gene-37.33-mRNA-1   | Japonica | NA       |        | Os01g0172200 | OsR498G0100242400.01.T02 | DEAD-box ATP-dependent RNA helicase 14                                      |
| maker-1-augustus-gene-37.36-mRNA-1   | Japonica | NA       |        | Os01g0172300 | OsR498G0100242600.01.T02 | DUF4050 domain-containing protein (Fragment)                                |
| maker-1-augustus-gene-37.39-mRNA-1   | Japonica | NA       |        | Os01g0172400 | OsR498G0100242800.01.T02 | Phospholipase D                                                             |
| maker-1-augustus-gene-37.42-mRNA-1   | Japonica | NA       |        | Os01g0173000 | OsR498G0100243400.01.T05 | Thiol-disulphide oxidoreductase DCC                                         |
| maker-1-augustus-gene-37.46-mRNA-1   | Japonica | NA       |        | Os01g0173100 | OsR498G0100243800.01.T01 | Alba domain-containing protein (Fragment)                                   |
| maker-1-augustus-gene-37.8-mRNA-1    | Japonica | NA       |        |              |                          | Polygalacturonase                                                           |
| maker-1-augustus-gene-373.15-mRNA-1  | Japonica | NA       |        | Os01g0850800 | OsR498G0102340700.01.T01 | Laccase                                                                     |
| maker-1-augustus-gene-38.31-mRNA-1   | Japonica | NA       |        | Os01g0173600 | OsR498G0100245300.01.T01 | VOC domain-containing protein (Fragment)                                    |
| maker-1-augustus-gene-38.35-mRNA-1   | Japonica | NA       |        | Os01g0173900 | OsR498G0100246500.01.T02 | ABC transporter C family member 3                                           |
| maker-1-augustus-gene-38.42-mRNA-1   | Japonica | NA       |        | Os01g0174000 | OsR498G0100246800.01.T01 | BZIP domain-containing protein (Fragment)                                   |
| maker-1-augustus-gene-38.44-mRNA-1   | Japonica | NA       |        | Os01g0174300 | OsR498G0100248000.01.T01 | NADH-cytochrome b5 reductase                                                |
| maker-1-augustus-gene-38.52-mRNA-1   | Japonica | NA       |        | Os01g0174600 | OsR498G0100248800.01.T01 | Zinc finger CCCH domain-containing protein 1                                |
| maker-1-augustus-gene-38.54-mRNA-1   | Japonica | NA       |        | Os01g0175000 | OsR498G0100250000.01.T02 | Acyl-protein thioesterase 2                                                 |
| maker-1-augustus-gene-39.0-mRNA-1    | Japonica | Indica   |        | Os01g0175300 | OsR498G0510826100.01.T01 | ATP-dependent DNA helicase                                                  |
| maker-1-augustus-gene-39.12-mRNA-1   | Japonica | NA       |        | Os01g0176700 | OsR498G0100256100.01.T02 | HTH myb-type domain-containing protein                                      |
| maker-1-augustus-gene-39.15-mRNA-1   | Japonica | NA       |        | Os01g0175200 |                          | Ankyrin-3                                                                   |
| maker-1-augustus-gene-39.16-mRNA-1   | Japonica | NA       |        | Os01g0175400 | OsR498G0100251400.01.T05 | Boron transporter-like protein 2                                            |

|                                     |          |          |  |              |                          |                                                                             |
|-------------------------------------|----------|----------|--|--------------|--------------------------|-----------------------------------------------------------------------------|
| maker-1-augustus-gene-39.3-mRNA-1   | Japonica | NA       |  | Os01g0176000 | OsR498G0100253300.01.T01 | Glycosyltransferase                                                         |
| maker-1-augustus-gene-39.41-mRNA-1  | Japonica | NA       |  | Os01g0175600 | OsR498G0100252000.01.T02 | Boron transporter                                                           |
| maker-1-augustus-gene-39.43-mRNA-1  | Japonica | Indica   |  | Os01g0175600 | OsR498G0100253000.01.T01 | Boron transporter                                                           |
| maker-1-augustus-gene-39.45-mRNA-1  | Japonica | NA       |  | Os01g0175700 |                          | Glycosyltransferase                                                         |
| maker-1-augustus-gene-39.5-mRNA-1   | Japonica | NA       |  | Os01g0176100 | OsR498G0100253700.01.T01 | Glycosyltransferase                                                         |
| maker-1-augustus-gene-39.7-mRNA-1   | Japonica | NA       |  | Os01g0176200 | OsR498G0100254100.01.T01 | Glycosyltransferase                                                         |
| maker-1-augustus-gene-39.9-mRNA-1   | Japonica | Indica   |  | Os05g0178000 | OsR498G0100254300.01.T01 | NPH3 domain-containing protein (Fragment)                                   |
| maker-1-augustus-gene-4.0-mRNA-1    | Japonica | Indica   |  | Os01g0513900 | OsR498G0100018900.01.T04 | Kinesin-related protein2                                                    |
| maker-1-augustus-gene-4.10-mRNA-1   | Japonica | NA       |  |              |                          | Non-specific serine/threonine protein kinase                                |
| maker-1-augustus-gene-4.19-mRNA-1   | Japonica | NA       |  | Os01g0106800 | OsR498G0100024900.01.T01 | RING-box protein 1a                                                         |
| maker-1-augustus-gene-4.21-mRNA-1   | Japonica | NA       |  | Os01g0105800 | OsR498G0100021200.01.T03 | Iron-sulfur assembly protein IscA-like 1 mitochondrial                      |
| maker-1-augustus-gene-4.23-mRNA-1   | Japonica | NA       |  | Os01g0105900 | OsR498G0100021400.01.T01 | PfkB family carbohydrate kinase                                             |
| maker-1-augustus-gene-4.28-mRNA-1   | Japonica | NA       |  | Os01g0106300 | OsR498G0100023200.01.T01 | NmrA domain-containing protein (Fragment)                                   |
| maker-1-augustus-gene-4.30-mRNA-1   | Japonica | NA       |  | Os01g0106400 | OsR498G0100023400.01.T01 | NmrA domain-containing protein (Fragment)                                   |
| maker-1-augustus-gene-4.32-mRNA-1   | Japonica | NA       |  | Os01g0106900 | OsR498G0100024800.01.T01 | 1-deoxy-D-xylulose-5-phosphate reductoisomerase                             |
| maker-1-augustus-gene-4.37-mRNA-1   | Japonica | NA       |  | Os01g0107000 | OsR498G0100025600.01.T02 | Peroxin-14                                                                  |
| maker-1-augustus-gene-4.4-mRNA-1    | Japonica | NA       |  | Os01g0105700 | OsR498G0100020700.01.T01 | BHLH domain-containing protein (Fragment)                                   |
| maker-1-augustus-gene-40.26-mRNA-1  | Japonica | NA       |  | Os01g0177200 | OsR498G0100258300.01.T01 | Ubiquitin carboxyl-terminal hydrolase                                       |
| maker-1-augustus-gene-40.34-mRNA-1  | Japonica | NA       |  |              | OsR498G0100261800.01.T01 | ABC transporter                                                             |
| maker-1-augustus-gene-40.42-mRNA-1  | Japonica | NA       |  | Os01g0178000 | OsR498G0100262600.01.T06 | Aromatic aminotransferase ISS1                                              |
| maker-1-augustus-gene-41.0-mRNA-1   | Japonica | NA       |  | Os01g0178100 |                          | Tudor domain-containing protein 3                                           |
| maker-1-augustus-gene-41.14-mRNA-1  | Japonica | NA       |  |              | OsR498G0100267100.01.T02 |                                                                             |
| maker-1-augustus-gene-41.16-mRNA-1  | Japonica | NA       |  | Os01g0179200 | OsR498G0100268100.01.T01 | t-SNARE coiled-coil homology domain-containing protein                      |
| maker-1-augustus-gene-41.20-mRNA-1  | Japonica | NA       |  | Os01g0179300 | OsR498G0100268300.01.T01 | Nuclear ubiquitous casein and cyclin-dependent kinase substrate 1-like prot |
| maker-1-augustus-gene-41.22-mRNA-1  | Japonica | NA       |  |              |                          | Embryo defective 2410                                                       |
| maker-1-augustus-gene-41.29-mRNA-1  | Japonica | NA       |  | Os01g0179500 | OsR498G0100268900.01.T02 | Enhancer of polycomb-like transcription factor protein                      |
| maker-1-augustus-gene-41.31-mRNA-1  | Japonica | Indica   |  | Os05g0178400 | OsR498G0100264200.01.T01 | Serine/threonine protein phosphatase 2A regulatory subunit                  |
| maker-1-augustus-gene-41.33-mRNA-1  | Japonica | NA       |  | Os01g0178500 | OsR498G0100264600.01.T01 | Auxin-responsive protein (Fragment)                                         |
| maker-1-augustus-gene-41.6-mRNA-1   | Japonica | NA       |  | Os01g0178200 | OsR498G0100263500.01.T05 | Tudor domain-containing protein 3 isoform X1                                |
| maker-1-augustus-gene-415.40-mRNA-1 | Japonica | Japonica |  | Os01g0602400 | OsR498G0101582500.01.T01 | Secologanin synthase                                                        |
| maker-1-augustus-gene-42.0-mRNA-1   | Japonica | Indica   |  | Os01g0179700 | OsR498G0100269800.01.T05 | GTP-binding protein YPTM2                                                   |
| maker-1-augustus-gene-42.11-mRNA-1  | Japonica | Indica   |  | Os01g0179901 | OsR498G0100270400.01.T02 |                                                                             |
| maker-1-augustus-gene-42.17-mRNA-1  | Japonica | NA       |  |              | OsR498G0100271800.01.T03 | FLZ-type domain-containing protein (Fragment)                               |
| maker-1-augustus-gene-42.19-mRNA-1  | Japonica | NA       |  |              |                          | ARF guanine-nucleotide exchange factor GNL2                                 |
| maker-1-augustus-gene-42.23-mRNA-1  | Japonica | NA       |  |              | OsR498G0100274000.01.T03 | DDT domain-containing protein DDR4                                          |
| maker-1-augustus-gene-42.5-mRNA-1   | Japonica | NA       |  | Os01g0179800 | OsR498G0100270200.01.T01 | Serine incorporator                                                         |
| maker-1-augustus-gene-43.0-mRNA-1   | Japonica | NA       |  | Os01g0180800 | OsR498G0100274100.01.T04 | Heat shock protein 4                                                        |
| maker-1-augustus-gene-43.10-mRNA-1  | Japonica | NA       |  | Os01g0181000 | OsR498G0100275400.01.T01 |                                                                             |
| maker-1-augustus-gene-43.13-mRNA-1  | Japonica | NA       |  |              | OsR498G0100276000.01.T02 |                                                                             |
| maker-1-augustus-gene-43.15-mRNA-1  | Japonica | NA       |  |              |                          | Ubiquitin-like domain-containing protein                                    |
| maker-1-augustus-gene-43.4-mRNA-1   | Japonica | Japonica |  | Os01g0180900 | OsR498G0100274900.01.T01 | PKHD-type hydroxylase                                                       |
| maker-1-augustus-gene-43.6-mRNA-1   | Japonica | NA       |  | Os01g0181200 |                          |                                                                             |
| maker-1-augustus-gene-44.1-mRNA-1   | Japonica | NA       |  | Os01g0182500 |                          |                                                                             |
| maker-1-augustus-gene-44.12-mRNA-1  | Japonica | NA       |  | Os01g0182200 | OsR498G0100277600.01.T02 | Aquaporin SIP                                                               |
| maker-1-augustus-gene-44.18-mRNA-1  | Japonica | NA       |  | Os01g0182600 | OsR498G0100279000.01.T05 | Gigantea-like protein (Fragment)                                            |
| maker-1-augustus-gene-44.23-mRNA-1  | Japonica | NA       |  |              |                          | WRKY transcription factor 21                                                |
| maker-1-augustus-gene-45.47-mRNA-1  | Japonica | NA       |  |              |                          | Transposon protein, putative, Mutator sub-class, expressed                  |
| maker-1-augustus-gene-45.51-mRNA-1  | Japonica | NA       |  | Os01g0183100 | OsR498G0100282100.01.T01 | probable U3 small nucleolar RNA-associated protein 7                        |
| maker-1-augustus-gene-45.56-mRNA-1  | Japonica | NA       |  | Os01g0184000 | OsR498G0100285700.01.T01 | Polynucleotide 5'-hydroxyl-kinase NOL9                                      |
| maker-1-augustus-gene-45.64-mRNA-1  | Japonica | NA       |  | Os01g0184900 | OsR498G0100286700.01.T01 | FACT complex subunit SSRP1-A                                                |
| maker-1-augustus-gene-45.70-mRNA-1  | Japonica | NA       |  | Os01g0183300 | OsR498G0100282600.01.T01 | Type IV inositol polyphosphate 5-phosphatase 3                              |
| maker-1-augustus-gene-45.72-mRNA-1  | Japonica | NA       |  | Os01g0183700 |                          | Histone-lysine N-methyltransferase ATX1                                     |
| maker-1-augustus-gene-45.76-mRNA-1  | Japonica | NA       |  | Os01g0184500 | OsR498G0100286200.01.T02 | DEAD-box ATP-dependent RNA helicase                                         |
| maker-1-augustus-gene-45.81-mRNA-1  | Japonica | NA       |  | Os01g0184800 | OsR498G0100286600.01.T01 | Phosducin domain-containing protein (Fragment)                              |
| maker-1-augustus-gene-46.30-mRNA-1  | Japonica | NA       |  |              | OsR498G0100286900.01.T01 | DNA double-strand break repair Rad50 ATPase (Fragment)                      |
| maker-1-augustus-gene-46.32-mRNA-1  | Japonica | NA       |  | Os01g0185300 | OsR498G0100287700.01.T02 | Acyl transferase 9                                                          |
| maker-1-augustus-gene-46.34-mRNA-1  | Japonica | Indica   |  | Os01g0185400 | OsR498G0100287900.01.T03 | Pleiotropic regulator 1 (Fragment)                                          |
| maker-1-augustus-gene-46.42-mRNA-1  | Japonica | NA       |  | Os01g0185900 | OsR498G0100288900.01.T01 | DNA-binding WRKY                                                            |
| maker-1-augustus-gene-46.50-mRNA-1  | Japonica | NA       |  | Os01g0186200 | OsR498G0100290000.01.T02 | Putative LOV domain-containing protein                                      |
| maker-1-augustus-gene-470.50-mRNA-1 | Japonica | NA       |  |              | OsR498G0102539200.01.T02 | Ceramide glucosyltransferase                                                |
| maker-1-augustus-gene-471.0-mRNA-1  | Japonica | NA       |  | Os01g0907200 | OsR498G0102542100.01.T01 | BCL-2 binding anthanogene-1                                                 |

|                                     |          |          |               |              |                          |                                                                              |
|-------------------------------------|----------|----------|---------------|--------------|--------------------------|------------------------------------------------------------------------------|
| maker-1-augustus-gene-471.2-mRNA-1  | Japonica | NA       |               | Os01g0907300 | OsR498G0102542500.01.T02 | GPI transamidase component PIG-S                                             |
| maker-1-augustus-gene-474.44-mRNA-1 | Japonica | NA       |               | Os01g0912700 | OsR498G0102560100.01.T03 | Thioredoxin F-type chloroplastic                                             |
| maker-1-augustus-gene-475.46-mRNA-1 | Japonica | NA       |               |              | OsR498G0102560700.01.T01 | Phorbol-ester/DAG-type domain-containing protein                             |
| maker-1-augustus-gene-475.48-mRNA-1 | Japonica | NA       |               | Os01g0913000 | OsR498G0102561700.01.T01 | Thioredoxin F-type like                                                      |
| maker-1-augustus-gene-475.51-mRNA-1 | Japonica | NA       |               | Os01g0913300 |                          | Putative proton-dependent oligopeptide or low-affinity nitrate transporter ( |
| maker-1-augustus-gene-475.53-mRNA-1 | Japonica | NA       |               | Os01g0914400 | OsR498G0102565100.01.T01 | EPIDERMAL PATTERNING FACTOR-like protein 9                                   |
| maker-1-augustus-gene-475.56-mRNA-1 | Japonica | NA       |               | Os01g0914700 | OsR498G0102565500.01.T01 | Putative PA domain, presenilin/signal peptide peptidase                      |
| maker-1-augustus-gene-475.58-mRNA-1 | Japonica | NA       |               | Os01g0914800 | OsR498G0102565700.01.T01 | Trichome birefringence-like 18 isoform 1                                     |
| maker-1-augustus-gene-475.62-mRNA-1 | Japonica | NA       |               |              | OsR498G0102565900.01.T02 |                                                                              |
| maker-1-augustus-gene-475.64-mRNA-1 | Japonica | NA       |               |              |                          | Phorbol-ester/DAG-type domain-containing protein                             |
| maker-1-augustus-gene-475.69-mRNA-1 | Japonica | NA       |               | Os01g0913600 | OsR498G0102563000.01.T01 | RHO protein GDP dissociation inhibitor                                       |
| maker-1-augustus-gene-475.71-mRNA-1 | Japonica | NA       |               | Os01g0914000 | OsR498G0102563800.01.T02 | ACT domain-containing protein ACR4                                           |
| maker-1-augustus-gene-476.0-mRNA-1  | Japonica | NA       |               | Os01g0916400 | OsR498G0102572700.01.T01 | Methanethiol oxidase                                                         |
| maker-1-augustus-gene-476.11-mRNA-1 | Japonica | NA       |               |              | OsR498G0102568000.01.T01 | Protein O-GlcNAc transferase                                                 |
| maker-1-augustus-gene-476.17-mRNA-1 | Japonica | NA       |               | Os01g0915600 | OsR498G0102568600.01.T04 | Transcription factor bHLH62                                                  |
| maker-1-augustus-gene-476.20-mRNA-1 | Japonica | NA       |               | Os01g0915800 | OsR498G0102571000.01.T01 | Peptidylprolyl isomerase                                                     |
| maker-1-augustus-gene-476.25-mRNA-1 | Japonica | NA       |               | Os01g0916200 | OsR498G0102572000.01.T01 | AP-4 complex subunit epsilon                                                 |
| maker-1-augustus-gene-476.31-mRNA-1 | Japonica | NA       |               | Os01g0916300 | OsR498G0102572200.01.T01 | Polyglutamine tract-binding protein 1                                        |
| maker-1-augustus-gene-476.37-mRNA-1 | Japonica | Japonica |               | Os01g0916800 | OsR498G0102573800.01.T02 | Tho2 domain-containing protein                                               |
| maker-1-augustus-gene-476.6-mRNA-1  | Japonica | NA       |               | Os01g0916600 | OsR498G0102573300.01.T05 | Putative glycine-rich RNA-binding protein 2                                  |
| maker-1-augustus-gene-476.9-mRNA-1  | Japonica | NA       |               | Os01g0916700 | OsR498G0102573500.01.T01 | SKI family transcriptional corepressor 2-like                                |
| maker-1-augustus-gene-477.0-mRNA-1  | Japonica | NA       |               | Os01g0917100 |                          | Jas domain-containing protein                                                |
| maker-1-augustus-gene-477.11-mRNA-1 | Japonica | NA       |               | Os01g0917400 | OsR498G0102576200.01.T01 | Zinc finger CCCH domain-containing protein 33                                |
| maker-1-augustus-gene-477.15-mRNA-1 | Japonica | NA       |               | Os01g0917700 | OsR498G0102577800.01.T02 | ROP-INTERACTIVE CRIB MOTIF-CONTAINING protein 6                              |
| maker-1-augustus-gene-477.17-mRNA-1 | Japonica | NA       |               | Os01g0918100 | OsR498G0102580200.01.T01 |                                                                              |
| maker-1-augustus-gene-477.2-mRNA-1  | Japonica | Indica   |               | Os01g0917200 | OsR498G0102575500.01.T01 | Peptidase S1, PA clan                                                        |
| maker-1-augustus-gene-477.20-mRNA-1 | Japonica | NA       |               | Os01g0918200 | OsR498G0102580600.01.T01 | Small ubiquitin-related modifier                                             |
| maker-1-augustus-gene-477.22-mRNA-1 | Japonica | NA       |               | Os01g0918300 | OsR498G0102580600.01.T02 | Small ubiquitin-related modifier                                             |
| maker-1-augustus-gene-477.25-mRNA-1 | Japonica | NA       |               | Os01g0918500 | OsR498G0102581400.01.T01 |                                                                              |
| maker-1-augustus-gene-477.5-mRNA-1  | Japonica | NA       | Kinase-LRR-TM | Os01g0917500 | OsR498G0102576500.01.T05 | Leucine-rich repeat receptor protein kinase MSP1                             |
| maker-1-augustus-gene-477.6-mRNA-1  | Japonica | NA       |               |              | OsR498G0102581100.01.T01 |                                                                              |
| maker-1-augustus-gene-477.8-mRNA-1  | Japonica | NA       |               |              | OsR498G0102575800.01.T01 | CRP7-Cysteine-rich family protein expressed                                  |
| maker-1-augustus-gene-478.31-mRNA-1 | Japonica | NA       |               |              | OsR498G0102582900.01.T01 | Protein DETOXIFICATION                                                       |
| maker-1-augustus-gene-478.33-mRNA-1 | Japonica | NA       |               | Os01g0919500 | OsR498G0102585300.01.T01 | E3 ubiquitin-protein ligase RNF4                                             |
| maker-1-augustus-gene-478.35-mRNA-1 | Japonica | NA       |               | Os01g0919600 | OsR498G0102586700.01.T02 | Lysine ketoglutarate reductase trans-splicing related 1-like                 |
| maker-1-augustus-gene-478.38-mRNA-1 | Japonica | NA       |               | Os01g0919700 | OsR498G0102586900.01.T02 | Alpha/beta hydrolase-1                                                       |
| maker-1-augustus-gene-478.45-mRNA-1 | Japonica | NA       |               | Os01g0920100 | OsR498G0102589300.01.T01 |                                                                              |
| maker-1-augustus-gene-478.48-mRNA-1 | Japonica | NA       |               |              | OsR498G0102584400.01.T01 | UDP-glucose-fructose-phosphate glucosyltransferase                           |
| maker-1-augustus-gene-478.50-mRNA-1 | Japonica | NA       |               | Os01g0919800 | OsR498G0102587200.01.T02 | Auxin efflux carrier component                                               |
| maker-1-augustus-gene-478.52-mRNA-1 | Japonica | NA       |               | Os01g0919900 | OsR498G0102588000.01.T01 | Acyl-(Acyl-carrier-protein) desaturase, chloroplastic                        |
| maker-1-augustus-gene-478.54-mRNA-1 | Japonica | Indica   |               | Os01g0920000 | OsR498G0102588400.01.T01 | Cystathionine beta-synthase, core                                            |
| maker-1-augustus-gene-478.56-mRNA-1 | Japonica | Indica   |               | Os01g0920200 | OsR498G0102589600.01.T01 | Transcription and mRNA export factor ENY2                                    |
| maker-1-augustus-gene-479.36-mRNA-1 | Japonica | NA       |               |              | OsR498G0102589900.01.T03 | MTS domain-containing protein                                                |
| maker-1-augustus-gene-479.43-mRNA-1 | Japonica | Indica   |               | Os03g0849900 | OsR498G0102590500.01.T01 | Nucleotide-diphospho-sugar transferase family protein                        |
| maker-1-augustus-gene-479.45-mRNA-1 | Japonica | Japonica |               | Os01g0920700 | OsR498G0102591100.01.T01 | Glycosyltransferase                                                          |
| maker-1-augustus-gene-479.48-mRNA-1 | Japonica | NA       |               | Os01g0921000 | OsR498G0102591900.01.T01 |                                                                              |
| maker-1-augustus-gene-479.52-mRNA-1 | Japonica | NA       |               | Os01g0921200 | OsR498G0102592700.01.T01 | Mannosyl-oligosaccharide glucosidase                                         |
| maker-1-augustus-gene-479.53-mRNA-1 | Japonica | NA       |               | Os01g0921300 | OsR498G0102592900.01.T01 | Exostosin domain-containing protein (Fragment)                               |
| maker-1-augustus-gene-479.70-mRNA-1 | Japonica | NA       |               | Os01g0921600 | OsR498G0102593500.01.T01 | Mitochondrial import receptor subunit like                                   |
| maker-1-augustus-gene-479.76-mRNA-1 | Japonica | NA       |               | Os01g0920400 | OsR498G0102590200.01.T01 | Dynamin-related protein 3A isoform 2                                         |
| maker-1-augustus-gene-479.81-mRNA-1 | Japonica | NA       |               | Os01g0921500 | OsR498G0102593400.01.T01 | AMP-activated protein kinase, gamma regulatory subunit                       |
| maker-1-augustus-gene-479.83-mRNA-1 | Japonica | NA       |               | Os01g0921800 | OsR498G0102595400.01.T01 | MYND-type domain-containing protein                                          |
| maker-1-augustus-gene-480.0-mRNA-1  | Japonica | Indica   |               | Os01g0922600 | OsR498G0102601900.01.T01 | SBP-box family member protein (Fragment)                                     |
| maker-1-augustus-gene-480.2-mRNA-1  | Japonica | NA       |               |              | OsR498G0102603900.01.T02 | MADS-box transcription factor                                                |
| maker-1-augustus-gene-480.8-mRNA-1  | Japonica | NA       |               |              | OsR498G0102604200.01.T01 |                                                                              |
| maker-1-augustus-gene-481.22-mRNA-1 | Japonica | NA       |               |              | OsR498G0102606300.01.T02 | PB1 domain-containing protein/CBS domain-containing protein                  |
| maker-1-augustus-gene-481.28-mRNA-1 | Japonica | NA       |               | Os01g0923600 | OsR498G0102607100.01.T06 | Calmodulin-binding transcription activator 4                                 |
| maker-1-augustus-gene-481.33-mRNA-1 | Japonica | NA       |               | Os01g0924000 | OsR498G0102611700.01.T01 | Mitochondrial ribosomal protein MRP7 (L2)                                    |
| maker-1-augustus-gene-481.35-mRNA-1 | Japonica | NA       |               |              | OsR498G0102607600.01.T04 | Histidine kinase                                                             |
| maker-1-augustus-gene-481.41-mRNA-1 | Japonica | NA       |               | Os01g0924300 | OsR498G0102612600.01.T02 | Putative WD repeat-containing protein C17D11.16                              |
| maker-1-augustus-gene-482.27-mRNA-1 | Japonica | NA       |               | Os01g0924700 | OsR498G0102614300.01.T01 | Protein kinase domain-containing protein                                     |

|                                     |          |          |           |              |                          |                                                               |
|-------------------------------------|----------|----------|-----------|--------------|--------------------------|---------------------------------------------------------------|
| maker-1-augustus-gene-482.35-mRNA-1 | Japonica | NA       |           | Os01g0925200 | OsR498G0102617500.01.T01 | Delta(3,5)-Delta(2,4)-dienoyl-CoA isomerase, mitochondrial    |
| maker-1-augustus-gene-482.37-mRNA-1 | Japonica | NA       |           |              | OsR498G0102614000.01.T03 | PERQ amino acid-rich with GYF domain-containing protein 2     |
| maker-1-augustus-gene-482.42-mRNA-1 | Japonica | Japonica |           | Os01g0924800 | OsR498G0102614600.01.T01 |                                                               |
| maker-1-augustus-gene-482.45-mRNA-1 | Japonica | NA       |           | Os01g0925000 | OsR498G0102617200.01.T02 | CID domain-containing protein                                 |
| maker-1-augustus-gene-482.51-mRNA-1 | Japonica | NA       | CC-NBS-TM |              | OsR498G0102617400.01.T01 | Disease resistance protein RPP13                              |
| maker-1-augustus-gene-482.53-mRNA-1 | Japonica | NA       |           | Os01g0925300 | OsR498G0102617800.01.T01 | S-acyltransferase                                             |
| maker-1-augustus-gene-483.34-mRNA-1 | Japonica | Indica   |           | Os01g0925600 | OsR498G0102618900.01.T01 |                                                               |
| maker-1-augustus-gene-483.37-mRNA-1 | Japonica | NA       |           |              | OsR498G0102620300.01.T01 | Tify domain-containing protein (Fragment)                     |
| maker-1-augustus-gene-483.39-mRNA-1 | Japonica | NA       |           | Os01g0926200 | OsR498G0102620500.01.T03 | E3 ubiquitin-protein ligase                                   |
| maker-1-augustus-gene-483.41-mRNA-1 | Japonica | NA       |           | Os01g0926800 | OsR498G0102622700.01.T01 | CRAL-TRIO domain-containing protein (Fragment)                |
| maker-1-augustus-gene-483.44-mRNA-1 | Japonica | NA       |           | Os01g0927000 | OsR498G0102623300.01.T01 | Histone-lysine N-methyltransferase H3 lysine-9 specific SUVH4 |
| maker-1-augustus-gene-483.49-mRNA-1 | Japonica | Japonica |           | Os01g0927200 | OsR498G0102623900.01.T01 | Trihelix transcription factor                                 |
| maker-1-augustus-gene-483.51-mRNA-1 | Japonica | Indica   | Kinase-TM | Os03g0349200 | OsR498G0102619200.01.T01 | probable serine/threonine-protein kinase At1g54610            |
| maker-1-augustus-gene-483.55-mRNA-1 | Japonica | NA       |           | Os01g0925800 | OsR498G0102620000.01.T01 | E2 ubiquitin-conjugating enzyme                               |
| maker-1-augustus-gene-483.58-mRNA-1 | Japonica | NA       |           | Os01g0926300 | OsR498G0102620800.01.T01 | Transaldolase                                                 |
| maker-1-augustus-gene-483.60-mRNA-1 | Japonica | NA       |           | Os01g0926400 | OsR498G0102621000.01.T01 | Exostosin domain-containing protein                           |
| maker-1-augustus-gene-483.62-mRNA-1 | Japonica | NA       |           | Os01g0926600 | OsR498G0102622000.01.T02 | Secondary cell wall glycosyltransferase family 47             |
| maker-1-augustus-gene-483.65-mRNA-1 | Japonica | Indica   |           | Os01g0926600 | OsR498G0102622400.01.T02 | Beta-1,4-xylosyltransferase IRX10L                            |
| maker-1-augustus-gene-484.0-mRNA-1  | Japonica | NA       |           | Os01g0927600 | OsR498G0102626700.01.T03 | Auxin response factor                                         |
| maker-1-augustus-gene-484.11-mRNA-1 | Japonica | NA       |           | Os01g0927300 | OsR498G0102624400.01.T03 | HMA domain-containing protein                                 |
| maker-1-augustus-gene-484.14-mRNA-1 | Japonica | NA       |           | Os01g0927900 | OsR498G0102627600.01.T02 | Aspartate kinase                                              |
| maker-1-augustus-gene-484.19-mRNA-1 | Japonica | NA       |           | Os01g0928000 | OsR498G0102627800.01.T02 | Inducer of CBF expression                                     |
| maker-1-augustus-gene-484.22-mRNA-1 | Japonica | NA       |           | Os01g0928100 | OsR498G0102629600.01.T01 | Coiled-coil domain-containing protein SCD2                    |
| maker-1-augustus-gene-484.28-mRNA-1 | Japonica | Japonica |           | Os01g0928400 | OsR498G0102630800.01.T01 | Serine C-palmitoyltransferase                                 |
| maker-1-augustus-gene-484.30-mRNA-1 | Japonica | Indica   |           | Os01g0928700 | OsR498G0102631800.01.T01 | Serine C-palmitoyltransferase                                 |
| maker-1-augustus-gene-484.32-mRNA-1 | Japonica | NA       |           | Os01g0928700 | OsR498G0102632000.01.T01 | Serine C-palmitoyltransferase                                 |
| maker-1-augustus-gene-484.4-mRNA-1  | Japonica | NA       |           |              | OsR498G0102630300.01.T02 | RNA polymerase II subunit 5-mediating protein homolog         |
| maker-1-augustus-gene-485.0-mRNA-1  | Japonica | NA       |           | Os01g0929000 | OsR498G0102632900.01.T04 | Aminopeptidase                                                |
| maker-1-augustus-gene-485.11-mRNA-1 | Japonica | NA       |           | Os01g0930400 | OsR498G0102636900.01.T01 | Potassium transporter                                         |
| maker-1-augustus-gene-485.13-mRNA-1 | Japonica | NA       |           | Os01g0930800 | OsR498G0102638700.01.T06 | Non-cyanogenic beta-glucosidase                               |
| maker-1-augustus-gene-485.16-mRNA-1 | Japonica | NA       |           | Os01g0930900 | OsR498G0102638900.01.T01 | Tropinone reductase                                           |
| maker-1-augustus-gene-485.18-mRNA-1 | Japonica | NA       |           | Os01g0931000 | OsR498G0102639100.01.T01 | Tropinone reductase                                           |
| maker-1-augustus-gene-485.20-mRNA-1 | Japonica | NA       |           | Os01g0928800 | OsR498G0102632600.01.T01 | Serine C-palmitoyltransferase                                 |
| maker-1-augustus-gene-485.26-mRNA-1 | Japonica | NA       | Kinase-TM |              | OsR498G0102633200.01.T02 | proline-rich receptor-like protein kinase PERK3 isoform X2    |
| maker-1-augustus-gene-485.29-mRNA-1 | Japonica | NA       |           | Os01g0931100 | OsR498G0102639400.01.T05 | Heparan-alpha-glucosaminide N-acetyltransferase isoform A     |
| maker-1-augustus-gene-485.35-mRNA-1 | Japonica | NA       |           | Os01g0931200 | OsR498G0102639800.01.T01 | TOG array regulator of axonemal microtubules protein 1        |
| maker-1-augustus-gene-485.37-mRNA-1 | Japonica | NA       |           | Os01g0931300 | OsR498G0102640000.01.T01 | PlsC domain-containing protein                                |
| maker-1-augustus-gene-485.4-mRNA-1  | Japonica | NA       |           | Os01g0929100 |                          | Photosynthetic NDH subunit of subcomplex B 5 chloroplastic    |
| maker-1-augustus-gene-485.41-mRNA-1 | Japonica | NA       |           | Os01g0931400 | OsR498G0102640200.01.T04 | Thiamine pyrophosphokinase                                    |
| maker-1-augustus-gene-485.6-mRNA-1  | Japonica | NA       |           | Os01g0930000 | OsR498G0102635300.01.T03 | protein disulfide-isomerase LQY1, chloroplastic isoform X2    |
| maker-1-augustus-gene-485.9-mRNA-1  | Japonica | NA       |           | Os01g0930200 | OsR498G0102635500.01.T01 |                                                               |
| maker-1-augustus-gene-486.0-mRNA-1  | Japonica | NA       |           |              | OsR498G0102641100.01.T01 | LURP1-related protein domain containing protein               |
| maker-1-augustus-gene-486.11-mRNA-1 | Japonica | Indica   |           | Os01g0932825 | OsR498G0102645300.01.T01 | Knot1 domain-containing protein (Fragment)                    |
| maker-1-augustus-gene-486.13-mRNA-1 | Japonica | NA       |           |              | OsR498G0102640800.01.T01 |                                                               |
| maker-1-augustus-gene-486.15-mRNA-1 | Japonica | NA       |           | Os01g0932500 | OsR498G0102644600.01.T01 | Potassium transporter                                         |
| maker-1-augustus-gene-486.17-mRNA-1 | Japonica | NA       |           | Os01g0933200 | OsR498G0102646200.01.T02 | HMA domain-containing protein                                 |
| maker-1-augustus-gene-486.2-mRNA-1  | Japonica | NA       |           |              |                          |                                                               |
| maker-1-augustus-gene-486.20-mRNA-1 | Japonica | NA       |           | Os01g0933600 | OsR498G0102647600.01.T01 | NPH3 domain-containing protein                                |
| maker-1-augustus-gene-486.23-mRNA-1 | Japonica | NA       |           | Os01g0933900 | OsR498G0102648200.01.T01 | Glutathione transferase                                       |
| maker-1-augustus-gene-486.25-mRNA-1 | Japonica | NA       |           | Os01g0934000 | OsR498G0102648800.01.T01 | Autophagy-related protein 18a                                 |
| maker-1-augustus-gene-486.6-mRNA-1  | Japonica | NA       |           | Os01g0932600 | OsR498G0102645100.01.T02 | BTB domain-containing protein                                 |
| maker-1-augustus-gene-487.0-mRNA-1  | Japonica | NA       |           | Os01g0934200 | OsR498G0102649300.01.T07 | Mitochondrial thiamine pyrophosphate carrier like             |
| maker-1-augustus-gene-487.12-mRNA-1 | Japonica | Indica   |           | Os01g0934400 | OsR498G0102649700.01.T01 | PsbP domain-containing protein 7 chloroplastic                |
| maker-1-augustus-gene-487.15-mRNA-1 | Japonica | NA       |           | Os01g0935300 | OsR498G0102653900.01.T06 | Cullin domain-containing protein                              |
| maker-1-augustus-gene-487.19-mRNA-1 | Japonica | NA       |           | Os01g0935500 | OsR498G0102654700.01.T01 | Potassium transporter                                         |
| maker-1-augustus-gene-487.22-mRNA-1 | Japonica | Japonica |           | Os01g0934600 | OsR498G0102650600.01.T01 | Methyl jasmonate esterase                                     |
| maker-1-augustus-gene-487.25-mRNA-1 | Japonica | NA       | PIR7B     | Os01g0934800 | OsR498G0102650800.01.T01 | AB hydrolase-1 domain-containing protein                      |
| maker-1-augustus-gene-487.26-mRNA-1 | Japonica | NA       | PIR7A     | Os01g0934900 | OsR498G0102650800.01.T03 | AB hydrolase-1 domain-containing protein (Fragment)           |
| maker-1-augustus-gene-487.35-mRNA-1 | Japonica | NA       |           | Os01g0935000 |                          | Protein indeterminate-domain 12                               |
| maker-1-augustus-gene-487.37-mRNA-1 | Japonica | NA       |           | Os01g0935400 | OsR498G0102654200.01.T01 | Oxoglutarate/iron-dependent dioxygenase                       |
| maker-1-augustus-gene-487.8-mRNA-1  | Japonica | NA       |           | Os01g0934300 | OsR498G0102649500.01.T04 | Homeobox protein LUMINIDEPENDENS                              |

|                                      |          |          |            |              |                          |                                                                          |
|--------------------------------------|----------|----------|------------|--------------|--------------------------|--------------------------------------------------------------------------|
| maker-1-augustus-gene-488.36-mRNA-1  | Japonica | NA       |            | Os01g0935700 | OsR498G0102655100.01.T05 | Cytochrome c1 1 heme protein mitochondrial                               |
| maker-1-augustus-gene-488.40-mRNA-1  | Japonica | NA       | Kinase     | Os01g0936100 | OsR498G0102657500.01.T01 | Serine/threonine-protein kinase PBL27                                    |
| maker-1-augustus-gene-488.44-mRNA-1  | Japonica | NA       |            | Os01g0936500 |                          |                                                                          |
| maker-1-augustus-gene-488.46-mRNA-1  | Japonica | NA       |            |              | OsR498G0102655000.01.T04 | spermatogenesis-associated protein 20-like                               |
| maker-1-augustus-gene-488.53-mRNA-1  | Japonica | Indica   | Kinase-TM  | Os01g0935800 | OsR498G0102655400.01.T01 | Receptor-like protein kinase ANXUR1                                      |
| maker-1-augustus-gene-488.56-mRNA-1  | Japonica | NA       |            | Os01g0935900 | OsR498G0102655800.01.T01 | Succinate dehydrogenase subunit 4 mitochondrial                          |
| maker-1-augustus-gene-488.58-mRNA-1  | Japonica | Indica   |            | Os01g0936200 | OsR498G0102657800.01.T02 | probable feruloyl esterase A                                             |
| maker-1-augustus-gene-488.63-mRNA-1  | Japonica | NA       |            | Os01g0936700 | OsR498G0102658400.01.T01 |                                                                          |
| maker-1-augustus-gene-488.65-mRNA-1  | Japonica | NA       |            | Os01g0936800 | OsR498G0102658800.01.T02 | MSP domain-containing protein (Fragment)                                 |
| maker-1-augustus-gene-488.70-mRNA-1  | Japonica | NA       | CC-NBS-TM  | Os01g0937400 | OsR498G0102663200.01.T06 | Disease resistance protein RGA2                                          |
| maker-1-augustus-gene-489.37-mRNA-1  | Japonica | Japonica |            | Os01g0937500 | OsR498G0102664300.01.T01 | Putative xylanase inhibitor                                              |
| maker-1-augustus-gene-489.39-mRNA-1  | Japonica | NA       |            | Os01g0938200 | OsR498G0102666300.01.T01 | RNA-binding protein BRN1                                                 |
| maker-1-augustus-gene-489.44-mRNA-1  | Japonica | NA       |            | Os01g0938900 | OsR498G0102667300.01.T02 | NAC-A/B domain-containing protein                                        |
| maker-1-augustus-gene-489.48-mRNA-1  | Japonica | NA       |            | Os01g0939100 | OsR498G0102667700.01.T01 | Calcium-transporting ATPase                                              |
| maker-1-augustus-gene-489.53-mRNA-1  | Japonica | NA       |            | Os01g0939600 | OsR498G0102668700.01.T03 | Glycerol-3-phosphate dehydrogenase [NAD(+)]                              |
| maker-1-augustus-gene-489.56-mRNA-1  | Japonica | NA       |            | Os01g0938600 | OsR498G0102666800.01.T01 | Tyrosine-protein phosphatase non-receptor type 23-like                   |
| maker-1-augustus-gene-489.58-mRNA-1  | Japonica | Indica   |            | Os01g0939200 | OsR498G0102668000.01.T02 | F-box domain containing protein, expressed                               |
| maker-1-augustus-gene-489.60-mRNA-1  | Japonica | NA       |            | Os01g0939300 | OsR498G0102668200.01.T01 | BRCT domain-containing DNA repair protein                                |
| maker-1-augustus-gene-489.62-mRNA-1  | Japonica | NA       |            | Os01g0939400 | OsR498G0102668400.01.T01 | Vegetative cell wall protein gp1                                         |
| maker-1-augustus-gene-490.13-mRNA-1  | Japonica | Japonica |            | Os01g0939700 | OsR498G0102668910.01.T07 | S-formylglutathione hydrolase                                            |
| maker-1-augustus-gene-490.20-mRNA-1  | Japonica | NA       |            | Os01g0940000 | OsR498G0102671700.01.T03 | Cytokinin dehydrogenase                                                  |
| maker-1-augustus-gene-491.0-mRNA-1   | Japonica | NA       |            | Os01g0940600 | OsR498G0102673700.01.T01 | High chlorophyll fluorescence 153                                        |
| maker-1-augustus-gene-491.1-mRNA-1   | Japonica | Indica   |            | Os01g0941400 | OsR498G0102674100.01.T01 | Truncated pathogenesis-related protein 6                                 |
| maker-1-augustus-gene-491.12-mRNA-1  | Japonica | NA       |            | Os01g0941400 | OsR498G0102675700.01.T01 | Truncated pathogenesis-related protein 6                                 |
| maker-1-augustus-gene-492.10-mRNA-1  | Japonica | NA       |            | Os01g0944000 |                          |                                                                          |
| maker-1-augustus-gene-492.6-mRNA-1   | Japonica | Indica   |            | Os05g0375400 | OsR498G0102679000.01.T01 | Licheninase                                                              |
| maker-1-augustus-gene-493.101-mRNA-1 | Japonica | Indica   |            | Os01g0945766 | OsR498G0102687600.01.T01 | Amino-acid permease BAT1 like                                            |
| maker-1-augustus-gene-493.102-mRNA-1 | Japonica | NA       |            | Os01g0945766 | OsR498G0102688000.01.T03 | Putative GABA-specific permease                                          |
| maker-1-augustus-gene-493.115-mRNA-1 | Japonica | NA       |            | Os01g0945800 | OsR498G0102688200.01.T02 | RNA-binding protein Musashi homolog 1-like isoform X2                    |
| maker-1-augustus-gene-493.54-mRNA-1  | Japonica | Japonica |            | Os01g0944200 | OsR498G0102683900.01.T04 | RNase H domain-containing protein                                        |
| maker-1-augustus-gene-493.58-mRNA-1  | Japonica | NA       |            | Os01g0946300 | OsR498G0102688700.01.T01 | Lecithin-cholesterol acyltransferase-like 1                              |
| maker-1-augustus-gene-493.60-mRNA-1  | Japonica | NA       |            | Os01g0944700 | OsR498G0102685400.01.T01 | Endo-1,3-beta-glucanase                                                  |
| maker-1-augustus-gene-493.61-mRNA-1  | Japonica | NA       |            | Os01g0944800 |                          | Putative beta 1,3-glucanase                                              |
| maker-1-augustus-gene-493.66-mRNA-1  | Japonica | NA       |            |              | OsR498G0102686200.01.T02 | DNA repair protein recA, mitochondrial                                   |
| maker-1-augustus-gene-493.70-mRNA-1  | Japonica | Indica   |            | Os01g0945200 | OsR498G0102686800.01.T01 | Putative GABA-specific permease                                          |
| maker-1-augustus-gene-493.74-mRNA-1  | Japonica | Japonica |            | Os01g0945200 | OsR498G0102687000.01.T04 | Putative GABA-specific permease                                          |
| maker-1-augustus-gene-493.75-mRNA-1  | Japonica | NA       |            | Os01g0945300 | OsR498G0102687000.01.T06 | Putative GABA-specific permease                                          |
| maker-1-augustus-gene-493.76-mRNA-1  | Japonica | NA       |            | Os01g0945300 | OsR498G0102687000.01.T08 | Amino-acid permease BAT1                                                 |
| maker-1-augustus-gene-494.35-mRNA-1  | Japonica | NA       |            |              |                          | Glucan endo-1,3-beta-glucosidase GII                                     |
| maker-1-augustus-gene-494.38-mRNA-1  | Japonica | NA       |            | Os01g0947000 | OsR498G0102690700.01.T01 | Glucan endo-1,3-beta-glucosidase GIII                                    |
| maker-1-augustus-gene-494.40-mRNA-1  | Japonica | NA       |            | Os01g0948100 | OsR498G0102690900.01.T02 | ERCC4 domain-containing protein (Fragment)                               |
| maker-1-augustus-gene-494.46-mRNA-1  | Japonica | NA       |            | Os01g0948300 | OsR498G0102693300.01.T01 | Cellular retinaldehyde-binding/triple function, C-terminal               |
| maker-1-augustus-gene-494.50-mRNA-1  | Japonica | NA       |            | Os01g0948400 | OsR498G0102693800.01.T02 | Pyrroline-5-carboxylate reductase                                        |
| maker-1-augustus-gene-495.4-mRNA-1   | Japonica | Indica   |            | Os01g0948900 | OsR498G0102696200.01.T01 | BTB/POZ domain and ankyrin repeat-containing protein NPR5                |
| maker-1-augustus-gene-495.8-mRNA-1   | Japonica | NA       |            |              |                          | Protein OSB3, chloroplastic/mitochondrial                                |
| maker-1-augustus-gene-496.0-mRNA-1   | Japonica | NA       |            | Os01g0950000 | OsR498G0102702700.01.T01 | Glutathione S-transferase GST 29                                         |
| maker-1-augustus-gene-496.11-mRNA-1  | Japonica | NA       |            | Os01g0951100 | OsR498G0102704700.01.T01 | probable ADP-ribosylation factor GTPase-activating protein AGD11         |
| maker-1-augustus-gene-496.25-mRNA-1  | Japonica | NA       |            | Os01g0952000 | OsR498G0102706900.01.T02 | Germin-like protein 1-3                                                  |
| maker-1-augustus-gene-496.27-mRNA-1  | Japonica | NA       |            | Os01g0952100 | OsR498G0102707100.01.T01 | Germin-like protein 1-4                                                  |
| maker-1-augustus-gene-496.29-mRNA-1  | Japonica | NA       |            | Os01g0952200 | OsR498G0102707300.01.T01 | Helicase C-terminal domain-containing protein                            |
| maker-1-augustus-gene-496.41-mRNA-1  | Japonica | NA       |            |              |                          | Flowering time control protein FY                                        |
| maker-1-augustus-gene-496.47-mRNA-1  | Japonica | NA       |            | Os01g0951800 | OsR498G0102706400.01.T01 | Mitochondrial fission 1 protein A (Fragment)                             |
| maker-1-augustus-gene-496.49-mRNA-1  | Japonica | NA       |            | Os01g0952300 | OsR498G0102707600.01.T01 | Regulator of chromosome condensation (RCC1) family with FYVE zinc finger |
| maker-1-augustus-gene-497.55-mRNA-1  | Japonica | Japonica | LRR-NBS-TM | Os01g0953400 | OsR498G0102712500.01.T01 | Leucine Rich Repeat family protein, expressed                            |
| maker-1-augustus-gene-497.56-mRNA-1  | Japonica | NA       |            | Os01g0954000 | OsR498G0102714500.01.T01 | NAD(P)H dehydrogenase (quinone)                                          |
| maker-1-augustus-gene-497.58-mRNA-1  | Japonica | NA       |            |              | OsR498G0102716500.01.T01 | E3 ubiquitin-protein ligase RHF2A isoform X1                             |
| maker-1-augustus-gene-497.62-mRNA-1  | Japonica | NA       |            | Os01g0952800 | OsR498G0102710200.01.T03 | Transcription factor ORG2                                                |
| maker-1-augustus-gene-498.28-mRNA-1  | Japonica | NA       |            |              | OsR498G0102722700.01.T01 |                                                                          |
| maker-1-augustus-gene-498.31-mRNA-1  | Japonica | NA       |            |              | OsR498G0102723100.01.T03 | Chloroquine-resistance transporter-like                                  |
| maker-1-augustus-gene-498.36-mRNA-1  | Japonica | NA       |            | Os01g0954500 | OsR498G0102717800.01.T04 | Zinc finger, lateral root primordium type 1                              |
| maker-1-augustus-gene-498.39-mRNA-1  | Japonica | NA       |            | Os01g0955000 | OsR498G0102720600.01.T01 | Non-specific phospholipase                                               |

|                                     |          |          |               |              |                          |                                                                              |
|-------------------------------------|----------|----------|---------------|--------------|--------------------------|------------------------------------------------------------------------------|
| maker-1-augustus-gene-499.0-mRNA-1  | Japonica | Indica   |               | Os01g0956500 | OsR498G0102727900.01.T02 |                                                                              |
| maker-1-augustus-gene-499.14-mRNA-1 | Japonica | NA       | Kinase-LRR-TM | Os01g0957100 | OsR498G0102731100.01.T01 | Inactive leucine-rich repeat receptor-like protein kinase-like               |
| maker-1-augustus-gene-499.16-mRNA-1 | Japonica | NA       |               | Os01g0957200 | OsR498G0102731500.01.T01 | Protein RETICULATA-RELATED 4, chloroplastic isoform A                        |
| maker-1-augustus-gene-499.19-mRNA-1 | Japonica | NA       |               |              | OsR498G0102733500.01.T01 | Germacrene A oxidase                                                         |
| maker-1-augustus-gene-499.21-mRNA-1 | Japonica | NA       |               | Os01g0956700 | OsR498G0102729800.01.T01 |                                                                              |
| maker-1-augustus-gene-499.6-mRNA-1  | Japonica | NA       |               | Os01g0956600 | OsR498G0102728900.01.T01 | RRM domain-containing protein                                                |
| maker-1-augustus-gene-499.9-mRNA-1  | Japonica | NA       |               |              | OsR498G0102730700.01.T03 | NAD kinase 1                                                                 |
| maker-1-augustus-gene-5.29-mRNA-1   | Japonica | NA       |               | Os01g0107700 | OsR498G0100027300.01.T01 | Exostosin domain-containing protein                                          |
| maker-1-augustus-gene-5.32-mRNA-1   | Japonica | Japonica |               | Os01g0108000 | OsR498G0100027900.01.T01 |                                                                              |
| maker-1-augustus-gene-5.36-mRNA-1   | Japonica | NA       |               | Os01g0108200 | OsR498G0100028100.01.T01 | Serine-type endopeptidase                                                    |
| maker-1-augustus-gene-5.40-mRNA-1   | Japonica | Japonica |               | Os01g0108400 | OsR498G0100028700.01.T02 | BHLH domain-containing protein (Fragment)                                    |
| maker-1-augustus-gene-5.43-mRNA-1   | Japonica | Indica   |               | Os01g0108600 | OsR498G0100029700.01.T01 | BHLH transcription factor                                                    |
| maker-1-augustus-gene-5.45-mRNA-1   | Japonica | NA       |               |              | OsR498G0100030100.01.T02 |                                                                              |
| maker-1-augustus-gene-5.48-mRNA-1   | Japonica | NA       | Kinase-TM     |              | OsR498G0100026400.01.T01 | Serine/threonine protein kinase                                              |
| maker-1-augustus-gene-5.52-mRNA-1   | Japonica | NA       |               |              | OsR498G0100027600.01.T03 | Executer 1                                                                   |
| maker-1-augustus-gene-500.1-mRNA-1  | Japonica | NA       |               |              | OsR498G0102733900.01.T03 | NUC173 domain-containing protein                                             |
| maker-1-augustus-gene-500.16-mRNA-1 | Japonica | NA       |               | Os01g0958500 | OsR498G0102735500.01.T01 | RNA-binding family protein isoform 1                                         |
| maker-1-augustus-gene-500.20-mRNA-1 | Japonica | NA       |               | Os01g0958700 | OsR498G0102736100.01.T01 | MACPF domain-containing protein isoform X1                                   |
| maker-1-augustus-gene-500.25-mRNA-1 | Japonica | NA       |               |              |                          |                                                                              |
| maker-1-augustus-gene-500.26-mRNA-1 | Japonica | NA       |               | Os01g0958900 | OsR498G0102736500.01.T03 | DNA mismatch repair protein MLH1                                             |
| maker-1-augustus-gene-500.39-mRNA-1 | Japonica | NA       |               | Os01g0959000 | OsR498G0102736700.01.T03 | Serine/arginine-rich splicing factor 33                                      |
| maker-1-augustus-gene-500.42-mRNA-1 | Japonica | NA       |               | Os01g0959200 | OsR498G0102737100.01.T01 | Absciscic stress-ripening protein 1                                          |
| maker-1-augustus-gene-500.46-mRNA-1 | Japonica | NA       |               | Os01g0959900 | OsR498G0102739700.01.T01 | NADH dehydrogenase-like complex O                                            |
| maker-1-augustus-gene-500.60-mRNA-1 | Japonica | Indica   |               | Os01g0958800 | OsR498G0102736400.01.T02 | Lipid droplet-associated hydrolase                                           |
| maker-1-augustus-gene-500.66-mRNA-1 | Japonica | NA       |               | Os01g0959100 | OsR498G0102737000.01.T01 | Absciscic stress-ripening protein 1                                          |
| maker-1-augustus-gene-500.68-mRNA-1 | Japonica | NA       |               |              | OsR498G0102739200.01.T02 | Phosphatidylserine decarboxylase                                             |
| maker-1-augustus-gene-501.0-mRNA-1  | Japonica | NA       |               | Os01g0961200 | OsR498G0102743100.01.T01 | CBS-PB1 domain contining protein                                             |
| maker-1-augustus-gene-501.16-mRNA-1 | Japonica | NA       |               | Os01g0962300 | OsR498G0102745100.01.T01 | V-type proton ATPase proteolipid subunit                                     |
| maker-1-augustus-gene-501.18-mRNA-1 | Japonica | NA       |               | Os01g0960300 | OsR498G0102740600.01.T01 | Glucose-inhibited division family A protein isoform 1                        |
| maker-1-augustus-gene-501.23-mRNA-1 | Japonica | NA       | Kinase-LRR-TM | Os01g0960400 | OsR498G0102740800.01.T02 | Putative leucine-rich repeat receptor-like serine/threonine-protein kinase   |
| maker-1-augustus-gene-501.38-mRNA-1 | Japonica | NA       |               | Os01g0960500 | OsR498G0102742000.01.T01 | E3 ubiquitin-protein ligase RGLG3                                            |
| maker-1-augustus-gene-501.43-mRNA-1 | Japonica | Indica   |               | Os01g0956500 | OsR498G0102742200.01.T02 | Protein kinase domain-containing protein                                     |
| maker-1-augustus-gene-501.46-mRNA-1 | Japonica | NA       |               | Os01g0960800 | OsR498G0102742400.01.T01 | Mitochondrial import inner membrane translocase                              |
| maker-1-augustus-gene-501.48-mRNA-1 | Japonica | NA       |               |              | OsR498G0102742800.01.T01 | Nitrate excretion transporter 1                                              |
| maker-1-augustus-gene-501.55-mRNA-1 | Japonica | Indica   |               | Os01g0962200 | OsR498G0102744800.01.T01 | Senescence associated proteingene 18 isoform 1                               |
| maker-1-augustus-gene-501.58-mRNA-1 | Japonica | NA       |               | Os01g0962400 | OsR498G0102745400.01.T01 | Ubiquitin-fold modifier 1                                                    |
| maker-1-augustus-gene-501.6-mRNA-1  | Japonica | NA       |               | Os01g0961300 | OsR498G0102743300.01.T03 |                                                                              |
| maker-1-augustus-gene-501.61-mRNA-1 | Japonica | NA       |               | Os01g0962500 | OsR498G0102745600.01.T01 | HIT-type domain-containing protein                                           |
| maker-1-augustus-gene-501.64-mRNA-1 | Japonica | NA       |               | Os01g0962600 | OsR498G0102745800.01.T01 | Small subunit ribosomal protein S10e                                         |
| maker-1-augustus-gene-502.0-mRNA-1  | Japonica | NA       |               | Os01g0962700 | OsR498G0102746100.01.T01 | Peroxidase                                                                   |
| maker-1-augustus-gene-502.10-mRNA-1 | Japonica | NA       |               |              | OsR498G0102748900.01.T01 |                                                                              |
| maker-1-augustus-gene-502.12-mRNA-1 | Japonica | NA       |               | Os01g0963600 | OsR498G0102749300.01.T01 | Absciscic stress-ripening protein 2                                          |
| maker-1-augustus-gene-502.14-mRNA-1 | Japonica | NA       |               |              | OsR498G0102749900.01.T02 | Bile salt-activated lipase-like                                              |
| maker-1-augustus-gene-502.16-mRNA-1 | Japonica | NA       |               | Os01g0963300 | OsR498G0102748600.01.T01 | t-SNARE coiled-coil homology domain-containing protein (Fragment)            |
| maker-1-augustus-gene-502.2-mRNA-1  | Japonica | NA       |               | Os01g0962900 | OsR498G0102746700.01.T01 | Peroxidase                                                                   |
| maker-1-augustus-gene-502.21-mRNA-1 | Japonica | NA       |               | Os01g0964000 | OsR498G0102750400.01.T01 | Synaptobrevin-like protein YKT6                                              |
| maker-1-augustus-gene-502.24-mRNA-1 | Japonica | Indica   |               | Os05g0106600 | OsR498G0102750600.01.T01 | Beta-actin                                                                   |
| maker-1-augustus-gene-502.4-mRNA-1  | Japonica | Indica   |               | Os01g0963200 | OsR498G0102748300.01.T01 | Peroxidase                                                                   |
| maker-1-augustus-gene-502.6-mRNA-1  | Japonica | Indica   |               | Os01g0963400 | OsR498G0102748700.01.T02 | Thioredoxin Y, chloroplastic                                                 |
| maker-1-augustus-gene-503.14-mRNA-1 | Japonica | NA       |               |              | OsR498G0102756700.01.T05 | ABC transporter D family member 1                                            |
| maker-1-augustus-gene-503.3-mRNA-1  | Japonica | NA       | Kinase-TM     |              | OsR498G0102753900.01.T01 | Putative serine-threonine/tyrosine-protein kinase catalytic domain-containin |
| maker-1-augustus-gene-503.31-mRNA-1 | Japonica | NA       |               |              |                          | DNA-directed RNA polymerase subunit                                          |
| maker-1-augustus-gene-503.34-mRNA-1 | Japonica | NA       |               | Os01g0965600 | OsR498G0102755000.01.T01 | Coiled-coil domain-containing protein R3HCC1L                                |
| maker-1-augustus-gene-503.37-mRNA-1 | Japonica | NA       |               | Os01g0965900 | OsR498G0102755800.01.T01 | Transcription initiation factor TFIID subunit like                           |
| maker-1-augustus-gene-503.45-mRNA-1 | Japonica | NA       | LRR-TM        | Os01g0966400 | OsR498G0102757400.01.T01 | Protein phosphatase 1 regulatory subunit like                                |
| maker-1-augustus-gene-503.5-mRNA-1  | Japonica | NA       |               | Os01g0965400 | OsR498G0102754100.01.T01 | Uridine monophosphate kinase                                                 |
| maker-1-augustus-gene-503.9-mRNA-1  | Japonica | NA       |               |              | OsR498G0102754300.01.T01 | Histone-lysine N-methyltransferase ATXR6                                     |
| maker-1-augustus-gene-504.53-mRNA-1 | Japonica | NA       |               | Os01g0967800 | OsR498G0102761500.01.T01 |                                                                              |
| maker-1-augustus-gene-504.55-mRNA-1 | Japonica | NA       |               | Os01g0967900 | OsR498G0102761700.01.T01 | Aspartyl aminopeptidase                                                      |
| maker-1-augustus-gene-504.64-mRNA-1 | Japonica | NA       |               |              |                          | BACK domain-containing protein                                               |
| maker-1-augustus-gene-504.74-mRNA-1 | Japonica | NA       |               | Os01g0968000 | OsR498G0102762000.01.T01 | Ribonuclease P                                                               |

|                                     |          |          |               |              |                          |                                                                              |
|-------------------------------------|----------|----------|---------------|--------------|--------------------------|------------------------------------------------------------------------------|
| maker-1-augustus-gene-504.76-mRNA-1 | Japonica | NA       |               | Os01g0968100 | OsR498G0102762200.01.T01 | Late embryogenesis abundant protein-related / LEA protein-related            |
| maker-1-augustus-gene-504.78-mRNA-1 | Japonica | Indica   |               | Os01g0968300 | OsR498G0102762600.01.T01 | Late embryogenesis abundant protein-related / LEA protein-related            |
| maker-1-augustus-gene-504.80-mRNA-1 | Japonica | NA       |               | Os01g0969000 | OsR498G0102764600.01.T01 | Chloroplast outer envelope 24 kD protein                                     |
| maker-1-augustus-gene-504.82-mRNA-1 | Japonica | NA       |               | Os01g0969100 | OsR498G0102764800.01.T01 | UDP-D-apiose/UDP-D-xylose synthase                                           |
| maker-1-augustus-gene-506.16-mRNA-1 | Japonica | Indica   |               | Os01g0971700 | OsR498G0102774800.01.T03 | Ribosome association toxin RatA (Fragment)                                   |
| maker-1-augustus-gene-506.18-mRNA-1 | Japonica | NA       |               | Os01g0971900 | OsR498G0102775200.01.T02 | Pumilio homolog 3                                                            |
| maker-1-augustus-gene-506.5-mRNA-1  | Japonica | NA       |               | Os01g0972800 | OsR498G0102778700.01.T01 | DNA-binding WRKY                                                             |
| maker-1-augustus-gene-506.7-mRNA-1  | Japonica | NA       |               | Os01g0972900 | OsR498G0102778900.01.T01 | B-type cell cycle switch protein ccs52B                                      |
| maker-1-augustus-gene-507.0-mRNA-1  | Japonica | NA       |               | Os01g0973000 | OsR498G0102779100.01.T03 | Putative pyridoxal phosphatase                                               |
| maker-1-augustus-gene-507.12-mRNA-1 | Japonica | Indica   |               | Os01g0973300 | OsR498G0102779700.01.T01 | AP-3 complex subunit beta                                                    |
| maker-1-augustus-gene-507.18-mRNA-1 | Japonica | NA       |               | Os01g0973600 | OsR498G0102780500.01.T01 | Plant-specific domain TIGR01615 family protein (Fragment)                    |
| maker-1-augustus-gene-507.20-mRNA-1 | Japonica | NA       |               | Os01g0974000 | OsR498G0102780900.01.T01 | Protein TRIGALACTOSYLDIACYLGLYCEROL 2 chloroplastic                          |
| maker-1-augustus-gene-507.23-mRNA-1 | Japonica | Indica   |               | Os05g0111200 | OsR498G0102781100.01.T02 | Amino acid selective channel protein                                         |
| maker-1-augustus-gene-507.28-mRNA-1 | Japonica | NA       |               | Os01g0974600 | OsR498G0102782900.01.T04 | RRM domain-containing protein                                                |
| maker-1-augustus-gene-507.31-mRNA-1 | Japonica | NA       |               | Os01g0973200 | OsR498G0102779600.01.T01 | Kinetochore protein spc25                                                    |
| maker-1-augustus-gene-507.36-mRNA-1 | Japonica | NA       |               | Os01g0973400 | OsR498G0102780000.01.T01 | Elp3 domain-containing protein (Fragment)                                    |
| maker-1-augustus-gene-507.39-mRNA-1 | Japonica | NA       | Kinase-TM     | Os01g0973500 | OsR498G0102780200.01.T01 | receptor-like cytoplasmic kinase 176                                         |
| maker-1-augustus-gene-507.4-mRNA-1  | Japonica | Indica   |               | Os01g0550800 | OsR498G0102779300.01.T02 | Carboxyl-terminal peptidase-like                                             |
| maker-1-augustus-gene-507.43-mRNA-1 | Japonica | NA       |               |              |                          |                                                                              |
| maker-1-augustus-gene-507.48-mRNA-1 | Japonica | NA       |               | Os01g0974500 | OsR498G0102782800.01.T03 | Pectin acetyltransferase                                                     |
| maker-1-augustus-gene-507.51-mRNA-1 | Japonica | Indica   |               | Os05g0114000 | OsR498G0102783200.01.T04 | Inorganic diphosphatase                                                      |
| maker-1-augustus-gene-507.55-mRNA-1 | Japonica | NA       |               | Os01g0975000 | OsR498G0102784200.01.T01 | UPSTREAM OF FLC protein (DUF966)                                             |
| maker-1-augustus-gene-508.34-mRNA-1 | Japonica | Indica   |               | Os01g0975300 | OsR498G0102785500.01.T01 | Myb-related protein MYBAS2                                                   |
| maker-1-augustus-gene-508.37-mRNA-1 | Japonica | NA       |               |              |                          | fructose-bisphosphate aldolase-lysine N-methyltransferase, chloroplastic iso |
| maker-1-augustus-gene-508.42-mRNA-1 | Japonica | NA       |               | Os01g0976500 | OsR498G0102789100.01.T03 | NAB domain-containing protein (Fragment)                                     |
| maker-1-augustus-gene-508.44-mRNA-1 | Japonica | NA       |               | Os01g0975900 | OsR498G0102787800.01.T01 | Aquaporin TIP3                                                               |
| maker-1-augustus-gene-508.46-mRNA-1 | Japonica | NA       |               | Os01g0976000 | OsR498G0102788400.01.T03 | Vacuolar fusion protein MON1 homolog                                         |
| maker-1-augustus-gene-508.49-mRNA-1 | Japonica | Indica   |               | Os03g0280000 | OsR498G0102788600.01.T03 | ABC transporter                                                              |
| maker-1-augustus-gene-508.54-mRNA-1 | Japonica | NA       |               | Os01g0976600 | OsR498G0102789400.01.T01 | 2-methoxy-6-polyprenyl-1,4-benzoquinol methylase, mitochondrial              |
| maker-1-augustus-gene-508.57-mRNA-1 | Japonica | NA       |               | Os01g0976800 | OsR498G0102790200.01.T01 | GATA-type domain-containing protein                                          |
| maker-1-augustus-gene-509.16-mRNA-1 | Japonica | Indica   | Kinase-LRR-TM | Os01g0976900 | OsR498G0102790800.01.T02 | Mitogen-activated protein kinase kinase kinase                               |
| maker-1-augustus-gene-509.2-mRNA-1  | Japonica | NA       |               |              | OsR498G0102791300.01.T01 | DnaJ protein P58IPK homolog B                                                |
| maker-1-augustus-gene-509.21-mRNA-1 | Japonica | NA       |               | Os01g0977600 | OsR498G0102792600.01.T01 | E3 ubiquitin-protein ligase listerin                                         |
| maker-1-augustus-gene-509.26-mRNA-1 | Japonica | Indica   |               | Os01g0978100 | OsR498G0102794600.01.T01 | Cysteine synthase                                                            |
| maker-1-augustus-gene-509.7-mRNA-1  | Japonica | NA       |               |              | OsR498G0102794100.01.T05 | Mitochondrial uncoupling protein 1                                           |
| maker-1-augustus-gene-52.26-mRNA-1  | Japonica | NA       |               | Os01g0195700 | OsR498G0100335900.01.T01 | BHLH transcription factor                                                    |
| maker-1-augustus-gene-53.0-mRNA-1   | Japonica | NA       |               | Os01g0197100 | OsR498G0100341300.01.T01 | 3-epi-6-deoxocathasterone 23-monooxygenase isoform X2                        |
| maker-1-augustus-gene-53.10-mRNA-1  | Japonica | NA       |               |              | OsR498G0100341800.01.T04 | Dead box ATP-dependent RNA helicase                                          |
| maker-1-augustus-gene-53.14-mRNA-1  | Japonica | NA       |               | Os01g0197500 | OsR498G0100344000.01.T02 | Ceramidase                                                                   |
| maker-1-augustus-gene-53.17-mRNA-1  | Japonica | NA       |               |              | OsR498G0100344200.01.T01 | Cytokinin dehydrogenase                                                      |
| maker-1-augustus-gene-53.19-mRNA-1  | Japonica | Japonica |               | Os01g0197900 | OsR498G0100345200.01.T02 | RNA-dependent RNA polymerase                                                 |
| maker-1-augustus-gene-53.21-mRNA-1  | Japonica | Indica   |               | Os01g0198100 | OsR498G0100345000.01.T05 | RNA-dependent RNA polymerase                                                 |
| maker-1-augustus-gene-53.22-mRNA-1  | Japonica | Indica   |               | Os01g0198100 | OsR498G0100345000.01.T05 | RNA-dependent RNA polymerase                                                 |
| maker-1-augustus-gene-53.25-mRNA-1  | Japonica | NA       |               |              | OsR498G0100345200.01.T01 | RNA-dependent RNA polymerase                                                 |
| maker-1-augustus-gene-53.32-mRNA-1  | Japonica | NA       |               | Os01g0198200 | OsR498G0100345600.01.T01 | Casein kinase I hhp1                                                         |
| maker-1-augustus-gene-53.4-mRNA-1   | Japonica | NA       |               | Os01g0197400 | OsR498G0100343500.01.T04 | CA-responsive protein                                                        |
| maker-1-augustus-gene-55.18-mRNA-1  | Japonica | NA       | Kinase-TM     | Os01g0201200 | OsR498G0100357200.01.T04 | Serine/threonine-protein kinase                                              |
| maker-1-augustus-gene-55.7-mRNA-1   | Japonica | Indica   |               | Os03g0692000 | OsR498G0100356900.01.T01 | beta-glucuronosyltransferase GlcAT14B-like                                   |
| maker-1-augustus-gene-56.0-mRNA-1   | Japonica | NA       |               | Os01g0201600 | OsR498G0100361000.01.T01 | Meiosis 5                                                                    |
| maker-1-augustus-gene-56.2-mRNA-1   | Japonica | Indica   |               | Os01g0201700 | OsR498G0100361800.01.T03 | MADS-box transcription factor                                                |
| maker-1-augustus-gene-56.6-mRNA-1   | Japonica | Indica   |               | Os01g0201900 | OsR498G0100362800.01.T07 | Nodulin-26 like intrinsic protein                                            |
| maker-1-augustus-gene-57.0-mRNA-1   | Japonica | NA       |               | Os01g0202500 | OsR498G0100364900.01.T01 | B-box zinc finger protein 22                                                 |
| maker-1-augustus-gene-57.16-mRNA-1  | Japonica | NA       |               | Os01g0204000 | OsR498G0100370600.01.T01 | DNA polymerase delta subunit 3                                               |
| maker-1-augustus-gene-57.2-mRNA-1   | Japonica | Indica   |               | Os06g0157500 | OsR498G0100365100.01.T01 | Protein TWIN SISTER of FT (Fragment)                                         |
| maker-1-augustus-gene-57.4-mRNA-1   | Japonica | NA       |               | Os01g0202800 | OsR498G0100366800.01.T02 | Nodulin-26 like intrinsic protein                                            |
| maker-1-augustus-gene-57.5-mRNA-1   | Japonica | NA       |               |              | OsR498G0100366800.01.T02 | Aquaporin NIP-type                                                           |
| maker-1-augustus-gene-57.6-mRNA-1   | Japonica | NA       |               | Os01g0203000 | OsR498G0100367000.01.T01 | BES transcription factor                                                     |
| maker-1-augustus-gene-58.0-mRNA-1   | Japonica | NA       |               | Os01g0205100 | OsR498G0100372900.01.T01 | Leucine-rich repeat and WD repeat-containing protein 1                       |
| maker-1-augustus-gene-59.12-mRNA-1  | Japonica | NA       |               | Os01g0208700 | OsR498G0100384500.01.T01 | Phosphoenolpyruvate carboxylase                                              |
| maker-1-augustus-gene-59.16-mRNA-1  | Japonica | NA       |               | Os01g0209000 | OsR498G0100385100.01.T03 | Mannosyltransferase                                                          |
| maker-1-augustus-gene-6.0-mRNA-1    | Japonica | NA       |               |              | OsR498G0100031100.01.T02 | Deoxynucleoside triphosphate triphosphohydrolase SAMHD1                      |



|                                    |          |          |           |              |                          |                                                                                |
|------------------------------------|----------|----------|-----------|--------------|--------------------------|--------------------------------------------------------------------------------|
| maker-1-augustus-gene-6.10-mRNA-1  | Japonica | NA       |           | Os01g0110400 | OsR498G0100033900.01.T03 | Acetyl-CoA acetyltransferase, cytosolic 2                                      |
| maker-1-augustus-gene-6.15-mRNA-1  | Japonica | NA       |           | Os01g0111200 | OsR498G0100035700.01.T01 | Protein decapping like                                                         |
| maker-1-augustus-gene-6.19-mRNA-1  | Japonica | NA       |           | Os01g0109700 | OsR498G0100031800.01.T01 | Paired amphipathic helix protein Sin3                                          |
| maker-1-augustus-gene-6.26-mRNA-1  | Japonica | NA       |           | Os01g0109750 | OsR498G0100032000.01.T04 | Paired amphipathic helix protein Sin3-like 4 (Fragment)                        |
| maker-1-augustus-gene-6.29-mRNA-1  | Japonica | NA       |           | Os01g0110200 | OsR498G0100033600.01.T01 | Protein O-GlcNAc transferase (Fragment)                                        |
| maker-1-augustus-gene-6.31-mRNA-1  | Japonica | NA       | Kinase-TM | Os01g0110500 | OsR498G0100034200.01.T01 | Proline-rich receptor-like protein kinase PERK8                                |
| maker-1-augustus-gene-6.35-mRNA-1  | Japonica | NA       |           | Os01g0110700 | OsR498G0100034600.01.T01 | Phosphoenolpyruvate carboxylase                                                |
| maker-1-augustus-gene-6.37-mRNA-1  | Japonica | Indica   | LRR-TM    | Os01g0110800 | OsR498G0100035200.01.T01 | Piriformospora indica-insensitive protein 2                                    |
| maker-1-augustus-gene-6.40-mRNA-1  | Japonica | NA       |           | Os01g0111100 | OsR498G0100035600.01.T01 | Peptidyl-prolyl cis-trans isomerase                                            |
| maker-1-augustus-gene-6.6-mRNA-1   | Japonica | Indica   |           | Os06g0493600 | OsR498G0100033300.01.T01 | Phosphate transporter PHO1 like 1                                              |
| maker-1-augustus-gene-60.0-mRNA-1  | Japonica | NA       |           | Os01g0209200 |                          | Tyrosine 3-monooxygenase/tryptophan 5-monooxygenase activation protein         |
| maker-1-augustus-gene-60.12-mRNA-1 | Japonica | NA       |           | Os01g0209700 | OsR498G0100389000.01.T01 | Gibberellin 2-beta-dioxygenase                                                 |
| maker-1-augustus-gene-60.14-mRNA-1 | Japonica | NA       |           | Os01g0209800 | OsR498G0100389600.01.T01 | Cationic amino acid transporter like                                           |
| maker-1-augustus-gene-60.16-mRNA-1 | Japonica | Japonica |           | Os01g0210400 | OsR498G0100391800.01.T01 | PIK-related kinase, FAT                                                        |
| maker-1-augustus-gene-60.18-mRNA-1 | Japonica | NA       |           | Os01g0210500 | OsR498G0100392000.01.T01 | Heme-binding protein 2                                                         |
| maker-1-augustus-gene-60.3-mRNA-1  | Japonica | Japonica |           | Os01g0210300 | OsR498G0100391500.01.T01 |                                                                                |
| maker-1-augustus-gene-60.6-mRNA-1  | Japonica | NA       |           | Os01g0209400 | OsR498G0100386600.01.T01 | Polyadenylate-binding protein-interacting protein 9                            |
| maker-1-augustus-gene-61.24-mRNA-1 | Japonica | Indica   |           | Os01g0210800 | OsR498G0100394100.01.T01 | phospho-N-acetylmuramoyl-pentapeptide- transferase homolog isoform X1          |
| maker-1-augustus-gene-61.29-mRNA-1 | Japonica | NA       |           | Os01g0210700 | OsR498G0100393600.01.T03 | K <sup>+</sup> -channel ERG                                                    |
| maker-1-augustus-gene-62.5-mRNA-1  | Japonica | NA       |           | Os01g0212400 | OsR498G0100402300.01.T01 | sodium/calcium exchanger NCL                                                   |
| maker-1-augustus-gene-62.8-mRNA-1  | Japonica | NA       |           |              | OsR498G0100402600.01.T01 | SPOROCTELESS-like EAR-containing protein 2                                     |
| maker-1-augustus-gene-63.0-mRNA-1  | Japonica | NA       |           |              | OsR498G0100410300.01.T01 | Transcription factor like                                                      |
| maker-1-augustus-gene-63.11-mRNA-1 | Japonica | Indica   |           | Os01g0214600 | OsR498G0100411100.01.T01 | GDSL esterase/lipase                                                           |
| maker-1-augustus-gene-63.13-mRNA-1 | Japonica | NA       |           | Os01g0214800 | OsR498G0100411900.01.T01 | GDSL esterase/lipase                                                           |
| maker-1-augustus-gene-63.15-mRNA-1 | Japonica | Japonica |           | Os01g0215000 | OsR498G0100444200.01.T01 | ABC transporter D family member 2, chloroplastic (Fragment)                    |
| maker-1-augustus-gene-63.2-mRNA-1  | Japonica | NA       |           |              | OsR498G0100410500.01.T04 | Ferritin-like superfamily                                                      |
| maker-1-augustus-gene-63.20-mRNA-1 | Japonica | NA       |           | Os01g0214200 | OsR498G0100410000.01.T01 | Isoamyl acetate-hydrolyzing esterase                                           |
| maker-1-augustus-gene-63.7-mRNA-1  | Japonica | NA       |           | Os01g0214500 | OsR498G0100410700.01.T01 |                                                                                |
| maker-1-augustus-gene-63.9-mRNA-1  | Japonica | NA       |           |              | OsR498G1119638400.01.T01 | Transposon protein, putative, unclassified                                     |
| maker-1-augustus-gene-64.0-mRNA-1  | Japonica | NA       |           | Os01g0215700 | OsR498G0100415100.01.T01 | Gdsl esterase/lipase                                                           |
| maker-1-augustus-gene-64.2-mRNA-1  | Japonica | NA       |           | Os01g0216000 | OsR498G0100416300.01.T01 | GDSL esterase/lipase                                                           |
| maker-1-augustus-gene-64.4-mRNA-1  | Japonica | NA       |           | Os01g0216300 | OsR498G0100416500.01.T01 | GDSL esterase/lipase                                                           |
| maker-1-augustus-gene-65.12-mRNA-1 | Japonica | NA       |           | Os01g0218100 | OsR498G0100424900.01.T01 | Transcription factor bHLH30 like                                               |
| maker-1-augustus-gene-65.14-mRNA-1 | Japonica | NA       |           | Os01g0218200 | OsR498G0100426100.01.T01 | Inactive TPR repeat-containing thioredoxin TTL3                                |
| maker-1-augustus-gene-65.19-mRNA-1 | Japonica | NA       |           | Os01g0218500 | OsR498G0100427300.01.T01 | Phosphatidylethanolamine-binding protein PEBP                                  |
| maker-1-augustus-gene-65.23-mRNA-1 | Japonica | NA       |           | Os01g0218700 | OsR498G0100427600.01.T02 | Peroxisomal membrane ABC transporter family isoform 1                          |
| maker-1-augustus-gene-65.29-mRNA-1 | Japonica | NA       |           |              |                          | histone-lysine N-methyltransferase ATX4                                        |
| maker-1-augustus-gene-65.34-mRNA-1 | Japonica | NA       |           | Os01g0218900 | OsR498G0100428600.01.T03 | Histone-lysine N-methyltransferase ATX4                                        |
| maker-1-augustus-gene-65.6-mRNA-1  | Japonica | NA       |           |              | OsR498G0100423700.01.T04 | Transcriptional activator DEMETER                                              |
| maker-1-augustus-gene-66.0-mRNA-1  | Japonica | NA       |           | Os01g0219100 | OsR498G0100428900.01.T03 | Vesicle transport protein                                                      |
| maker-1-augustus-gene-66.10-mRNA-1 | Japonica | NA       |           | Os01g0219600 | OsR498G0100430000.01.T01 | Endoglucanase                                                                  |
| maker-1-augustus-gene-66.12-mRNA-1 | Japonica | NA       |           | Os01g0220100 | OsR498G0100430400.01.T02 | Endoglucanase                                                                  |
| maker-1-augustus-gene-66.14-mRNA-1 | Japonica | Indica   |           | Os05g0212400 | OsR498G0100431000.01.T02 | Ectonucleotide pyrophosphatase/phosphodiesterase family member 3               |
| maker-1-augustus-gene-66.19-mRNA-1 | Japonica | NA       |           | Os01g0220500 | OsR498G0100433200.01.T01 | Inhibitor I9 domain-containing protein (Fragment)                              |
| maker-1-augustus-gene-66.21-mRNA-1 | Japonica | NA       |           | Os01g0220700 | OsR498G0100435800.01.T03 | Bidirectional sugar transporter SWEET                                          |
| maker-1-augustus-gene-66.4-mRNA-1  | Japonica | NA       |           |              |                          | Reduced male fertility                                                         |
| maker-1-augustus-gene-66.6-mRNA-1  | Japonica | NA       |           | Os01g0219500 | OsR498G0100429700.01.T01 | AAI domain-containing protein                                                  |
| maker-1-augustus-gene-66.8-mRNA-1  | Japonica | NA       |           |              |                          | Translation elongation factor EF1B/ribosomal protein S6 family protein isoform |
| maker-1-augustus-gene-69.0-mRNA-1  | Japonica | NA       |           | Os01g0224300 | OsR498G0100453300.01.T01 | Cysteine alpha-hairpin motif superfamily                                       |
| maker-1-augustus-gene-69.15-mRNA-1 | Japonica | NA       |           |              | OsR498G0100458500.01.T01 | GTP-binding protein EngA                                                       |
| maker-1-augustus-gene-69.2-mRNA-1  | Japonica | NA       |           |              | OsR498G0100453700.01.T01 | Mitochondrial carrier protein CGI-69                                           |
| maker-1-augustus-gene-69.20-mRNA-1 | Japonica | NA       |           |              | OsR498G0100458700.01.T02 | GTP binding                                                                    |
| maker-1-augustus-gene-69.26-mRNA-1 | Japonica | NA       |           | Os01g0224200 | OsR498G0100453200.01.T01 | Plastid division protein PDV1                                                  |
| maker-1-augustus-gene-69.28-mRNA-1 | Japonica | NA       |           | Os01g0224500 | OsR498G0100454000.01.T01 | Phosphatidylinositol N-acetylglucosaminyltransferase (Fragment)                |
| maker-1-augustus-gene-69.31-mRNA-1 | Japonica | NA       |           | Os01g0225000 | OsR498G0100456800.01.T01 | Mitochondrial arginine transporter like                                        |
| maker-1-augustus-gene-69.34-mRNA-1 | Japonica | NA       |           |              | OsR498G0100459000.01.T01 | 3-methyl-2-oxobutanoate hydroxymethyltransferase                               |
| maker-1-augustus-gene-69.37-mRNA-1 | Japonica | NA       |           |              | OsR498G0100459200.01.T01 | 3-methyl-2-oxobutanoate hydroxymethyltransferase                               |
| maker-1-augustus-gene-69.7-mRNA-1  | Japonica | NA       |           | Os01g0224700 | OsR498G0100455300.01.T01 | Flavin-containing monooxygenase                                                |
| maker-1-augustus-gene-69.9-mRNA-1  | Japonica | NA       |           |              | OsR498G0100458300.01.T04 | Smr domain-containing protein                                                  |
| maker-1-augustus-gene-7.0-mRNA-1   | Japonica | NA       |           | Os01g0111250 | OsR498G0100035900.01.T03 | Usp domain-containing protein                                                  |
| maker-1-augustus-gene-7.11-mRNA-1  | Japonica | NA       |           | Os01g0111500 | OsR498G0100036600.01.T01 | Transcription factor bHLH83                                                    |

|                                    |          |          |               |              |                          |                                                                      |
|------------------------------------|----------|----------|---------------|--------------|--------------------------|----------------------------------------------------------------------|
| maker-1-augustus-gene-7.5-mRNA-1   | Japonica | NA       |               | Os01g0111400 |                          | Zinc finger BED domain-containing protein DAYSLEEPER                 |
| maker-1-augustus-gene-7.7-mRNA-1   | Japonica | NA       |               | Os01g0111600 | OsR498G0100037100.01.T01 | Protein MOTHER of FT and TF 1                                        |
| maker-1-augustus-gene-70.0-mRNA-1  | Japonica | Indica   |               | Os01g0226300 | OsR498G0100462300.01.T01 | Reticulon-like protein (Fragment)                                    |
| maker-1-augustus-gene-70.4-mRNA-1  | Japonica | NA       |               | Os01g0226500 | OsR498G0100462700.01.T05 | U11/U12 small nuclear ribonucleoprotein 59 kDa protein isoform A     |
| maker-1-augustus-gene-70.7-mRNA-1  | Japonica | NA       |               | Os01g0226600 | OsR498G0100463300.01.T03 | S-type anion channel SLAH3                                           |
| maker-1-augustus-gene-70.9-mRNA-1  | Japonica | NA       |               | Os01g0226200 | OsR498G0100461600.01.T01 | probable membrane-associated kinase regulator 2                      |
| maker-1-augustus-gene-71.28-mRNA-1 | Japonica | NA       |               | Os01g0227100 | OsR498G0100466700.01.T02 | Putative chlorophyll(ide) b reductase NYC1                           |
| maker-1-augustus-gene-71.33-mRNA-1 | Japonica | NA       | Kinase-TM     | Os01g0227200 | OsR498G0100467900.01.T01 | Receptor protein kinase PERK1                                        |
| maker-1-augustus-gene-71.37-mRNA-1 | Japonica | NA       |               | Os01g0227300 | OsR498G0100468100.01.T01 | Ras-related protein Rab7                                             |
| maker-1-augustus-gene-71.41-mRNA-1 | Japonica | Indica   |               | Os01g0227500 | OsR498G0100468300.01.T01 | Putative ferulate 5-hydroxylase                                      |
| maker-1-augustus-gene-71.43-mRNA-1 | Japonica | NA       |               | Os01g0227500 | OsR498G0100468500.01.T01 | Putative ferulate 5-hydroxylase                                      |
| maker-1-augustus-gene-71.45-mRNA-1 | Japonica | Indica   |               | Os01g0227800 | OsR498G0100468900.01.T01 |                                                                      |
| maker-1-augustus-gene-71.47-mRNA-1 | Japonica | NA       |               | Os01g0227800 | OsR498G0100469700.01.T01 | Putative ferulate 5-hydroxylase                                      |
| maker-1-augustus-gene-71.50-mRNA-1 | Japonica | Japonica | Kinase-LRR-TM | Os01g0228200 | OsR498G0100470100.01.T01 | Putative receptor kinase TRKc                                        |
| maker-1-augustus-gene-71.53-mRNA-1 | Japonica | NA       |               | Os01g0228400 | OsR498G0100471100.01.T02 | Pentatricopeptide repeat-containing protein isoform X1               |
| maker-1-augustus-gene-71.55-mRNA-1 | Japonica | NA       |               | Os01g0228300 | OsR498G0100470400.01.T01 | Peroxisomal membrane protein PMP22                                   |
| maker-1-augustus-gene-71.57-mRNA-1 | Japonica | NA       |               | Os01g0228500 | OsR498G0100471400.01.T04 | Late embryogenesis abundant protein group 2                          |
| maker-1-augustus-gene-71.59-mRNA-1 | Japonica | Indica   |               | Os01g0228600 | OsR498G0100471600.01.T02 | Hydroxyacid dehydrogenase                                            |
| maker-1-augustus-gene-71.62-mRNA-1 | Japonica | NA       |               | Os01g0228800 | OsR498G0100472000.01.T02 | VARLMGL domain-containing protein                                    |
| maker-1-augustus-gene-72.0-mRNA-1  | Japonica | Indica   |               | Os12g0238000 | OsR498G0100472700.01.T01 | Transcription factor myb                                             |
| maker-1-augustus-gene-72.14-mRNA-1 | Japonica | NA       |               | Os01g0229500 | OsR498G0100476300.01.T01 | 4HBT domain-containing protein (Fragment)                            |
| maker-1-augustus-gene-72.16-mRNA-1 | Japonica | NA       |               |              |                          | 4HBT domain-containing protein (Fragment)                            |
| maker-1-augustus-gene-72.18-mRNA-1 | Japonica | Indica   |               | Os01g0233900 | OsR498G0100477300.01.T01 | Ubiquitin-conjugating enzyme family protein, expressed               |
| maker-1-augustus-gene-72.27-mRNA-1 | Japonica | NA       |               | Os01g0229100 | OsR498G0100473000.01.T01 | Eukaryotic translation initiation factor 3 subunit L                 |
| maker-1-augustus-gene-72.31-mRNA-1 | Japonica | NA       |               | Os01g0229400 | OsR498G0100475200.01.T01 | Rac-like GTP-binding protein ARAC7                                   |
| maker-1-augustus-gene-72.34-mRNA-1 | Japonica | NA       |               | Os01g0229700 | OsR498G0100476600.01.T01 | RING-type E3 ubiquitin transferase                                   |
| maker-1-augustus-gene-72.7-mRNA-1  | Japonica | NA       |               | Os01g0229200 | OsR498G0100473100.01.T04 | Putative VHS/GAT domain containing family protein                    |
| maker-1-augustus-gene-73.38-mRNA-1 | Japonica | NA       |               | Os01g0231000 | OsR498G0100479700.01.T01 | Auxin-responsive protein IAA3                                        |
| maker-1-augustus-gene-73.41-mRNA-1 | Japonica | NA       |               | Os01g0861400 |                          | VACUOLAR SORTING RECEPTOR 2                                          |
| maker-1-augustus-gene-73.50-mRNA-1 | Japonica | NA       |               |              |                          | KH domain-containing protein (Fragment)                              |
| maker-1-augustus-gene-73.55-mRNA-1 | Japonica | NA       |               | Os01g0232000 | OsR498G0100482300.01.T01 | Aquaporin TIP4-4                                                     |
| maker-1-augustus-gene-73.57-mRNA-1 | Japonica | NA       |               | Os01g0232100 | OsR498G0100482700.01.T03 | Aquaporin TIP4-3                                                     |
| maker-1-augustus-gene-73.59-mRNA-1 | Japonica | NA       |               | Os01g0230200 |                          | Transcription factor bHLH68 isoform B                                |
| maker-1-augustus-gene-73.60-mRNA-1 | Japonica | NA       |               | Os01g0230200 | OsR498G0100477800.01.T05 | BHLH domain-containing protein                                       |
| maker-1-augustus-gene-73.71-mRNA-1 | Japonica | NA       |               | Os01g0231700 | OsR498G0100481600.01.T02 | 60s acidic ribosomal protein-domain-containing protein               |
| maker-1-augustus-gene-74.28-mRNA-1 | Japonica | NA       |               | Os01g0232300 | OsR498G0100484700.01.T02 | Zinc phosphodiesterase                                               |
| maker-1-augustus-gene-74.34-mRNA-1 | Japonica | NA       |               | Os01g0232400 | OsR498G0100484900.01.T01 | VHS domain-containing protein                                        |
| maker-1-augustus-gene-74.36-mRNA-1 | Japonica | NA       |               | Os01g0232500 | OsR498G0100485700.01.T02 | Putative ubiquitin-onjugating enzyme E2                              |
| maker-1-augustus-gene-74.39-mRNA-1 | Japonica | NA       |               | Os01g0232700 | OsR498G0100486100.01.T02 | Histidinol dehydrogenase                                             |
| maker-1-augustus-gene-74.47-mRNA-1 | Japonica | NA       | Kinase-TM     | Os01g0233800 | OsR498G0100488900.01.T01 | Serine/threonine-protein kinase                                      |
| maker-1-augustus-gene-74.49-mRNA-1 | Japonica | NA       |               |              | OsR498G0100486400.01.T01 | Glycosyltransferase family 92 protein (Fragment)                     |
| maker-1-augustus-gene-74.55-mRNA-1 | Japonica | NA       |               | Os01g0233000 | OsR498G0100487200.01.T02 | Salt stress root protein RS1                                         |
| maker-1-augustus-gene-74.58-mRNA-1 | Japonica | NA       |               | Os01g0233500 | OsR498G0100488600.01.T01 | Cyclin N-terminal domain-containing protein (Fragment)               |
| maker-1-augustus-gene-74.73-mRNA-1 | Japonica | NA       |               | Os01g0233900 | OsR498G0100489200.01.T05 | Ubiquitin-conjugating enzyme-like                                    |
| maker-1-augustus-gene-75.42-mRNA-1 | Japonica | NA       |               | Os01g0234100 | OsR498G0100489900.01.T01 | TF-B3 domain-containing protein                                      |
| maker-1-augustus-gene-75.46-mRNA-1 | Japonica | NA       |               | Os01g0235100 | OsR498G0100493500.01.T01 | Transcriptional coactivator p15 (PC4) family protein (KELP)          |
| maker-1-augustus-gene-75.49-mRNA-1 | Japonica | NA       |               | Os01g0235300 | OsR498G0100494100.01.T01 | SOUL heme-binding                                                    |
| maker-1-augustus-gene-75.51-mRNA-1 | Japonica | NA       |               |              | OsR498G0100496700.01.T05 | RNA-binding KH domain-containing protein RCF3                        |
| maker-1-augustus-gene-75.56-mRNA-1 | Japonica | NA       |               | Os02g0699700 | OsR498G0204598600.01.T05 | DNA topoisomerase 2                                                  |
| maker-1-augustus-gene-75.58-mRNA-1 | Japonica | NA       |               |              | OsR498G0100492200.01.T04 | SEC22 vesicle trafficking protein-like protein B                     |
| maker-1-augustus-gene-75.63-mRNA-1 | Japonica | NA       |               | Os01g0234850 | OsR498G0100492600.01.T01 | Phosphoinositide 4-kinase gamma 4, gamma 4,ubdk gamma 4,pi4k gamma 4 |
| maker-1-augustus-gene-75.66-mRNA-1 | Japonica | NA       |               | Os01g0234900 | OsR498G0100493200.01.T02 | RING-type E3 ubiquitin transferase                                   |
| maker-1-augustus-gene-75.68-mRNA-1 | Japonica | NA       |               | Os01g0235200 | OsR498G0100493800.01.T02 | Defective in meristem silencing 3                                    |
| maker-1-augustus-gene-75.73-mRNA-1 | Japonica | NA       |               |              | OsR498G0100494400.01.T01 | WPP domain-interacting tail-anchored protein 1                       |
| maker-1-augustus-gene-75.76-mRNA-1 | Japonica | NA       |               | Os01g0235700 | OsR498G0100495800.01.T01 | Transcription factor bHLH13                                          |
| maker-1-augustus-gene-76.32-mRNA-1 | Japonica | NA       |               | Os01g0236300 | OsR498G0100499700.01.T01 | Auxin response factor                                                |
| maker-1-augustus-gene-76.38-mRNA-1 | Japonica | NA       |               | Os01g0236400 | OsR498G0100500300.01.T01 | Probable protein ABIL3                                               |
| maker-1-augustus-gene-76.42-mRNA-1 | Japonica | NA       |               | Os01g0236700 | OsR498G0100502100.01.T04 | NIN like protein 7                                                   |
| maker-1-augustus-gene-76.47-mRNA-1 | Japonica | NA       |               | Os01g0237000 | OsR498G0100503300.01.T01 |                                                                      |
| maker-1-augustus-gene-76.49-mRNA-1 | Japonica | NA       |               | Os01g0236800 | OsR498G0100502400.01.T01 | Beta-amylase                                                         |
| maker-1-augustus-gene-76.54-mRNA-1 | Japonica | NA       |               | Os01g0237100 | OsR498G0100503600.01.T01 | probable 2-carboxy-D-arabinitol-1-phosphatase                        |

|                                      |          |          |  |              |                          |                                                                              |
|--------------------------------------|----------|----------|--|--------------|--------------------------|------------------------------------------------------------------------------|
| maker-1-augustus-gene-76.56-mRNA-1   | Japonica | NA       |  |              | OsR498G0100504200.01.T01 | Phenylcoumaran benzylic ether reductase (Fragment)                           |
| maker-1-augustus-gene-77.0-mRNA-1    | Japonica | NA       |  | Os01g0238500 | OsR498G0100507700.01.T01 | Branched-chain-amino-acid aminotransferase-like protein chloroplastic-like   |
| maker-1-augustus-gene-77.18-mRNA-1   | Japonica | Indica   |  | Os01g0237500 | OsR498G0100505800.01.T02 | NmrA domain-containing protein (Fragment)                                    |
| maker-1-augustus-gene-77.19-mRNA-1   | Japonica | Indica   |  | Os01g0237366 | OsR498G0100505800.01.T02 | NmrA domain-containing protein (Fragment)                                    |
| maker-1-augustus-gene-77.24-mRNA-1   | Japonica | NA       |  | Os01g0238800 |                          | Protein NUCLEAR FUSION DEFECTIVE 6 chloroplastic/mitochondrial               |
| maker-1-augustus-gene-77.26-mRNA-1   | Japonica | NA       |  | Os01g0239000 | OsR498G0100509200.01.T02 | Transcription activator GLK1 isoform X2                                      |
| maker-1-augustus-gene-77.5-mRNA-1    | Japonica | NA       |  | Os01g0238600 | OsR498G0100507900.01.T01 | Putative metal-nicotianamine transporter YSL1                                |
| maker-1-augustus-gene-77.7-mRNA-1    | Japonica | NA       |  | Os01g0238700 | OsR498G0100508300.01.T01 | Probable metal-nicotianamine transporter YSL1                                |
| maker-1-augustus-gene-77.9-mRNA-1    | Japonica | NA       |  |              | OsR498G0100508900.01.T01 | DDB1- and CUL4-associated factor 13                                          |
| maker-1-augustus-gene-78.38-mRNA-1   | Japonica | NA       |  |              | OsR498G0100514500.01.T02 |                                                                              |
| maker-1-augustus-gene-78.41-mRNA-1   | Japonica | Indica   |  | Os01g0240700 | OsR498G0100514900.01.T01 | Reverse transcriptase domain-containing protein                              |
| maker-1-augustus-gene-78.43-mRNA-1   | Japonica | Japonica |  | Os01g0240700 | OsR498G0100515300.01.T01 | DUF1618 domain-containing protein (Fragment)                                 |
| maker-1-augustus-gene-78.46-mRNA-1   | Japonica | Indica   |  | Os01g0241000 | OsR498G0100519100.01.T01 |                                                                              |
| maker-1-augustus-gene-78.48-mRNA-1   | Japonica | NA       |  | Os01g0239200 | OsR498G0100510600.01.T02 | Triose phosphate/phosphate translocator TPT chloroplastic                    |
| maker-1-augustus-gene-78.54-mRNA-1   | Japonica | NA       |  |              | OsR498G0100519400.01.T02 | Lecithin-cholesterol acyltransferase-like 1                                  |
| maker-1-augustus-gene-79.0-mRNA-1    | Japonica | NA       |  |              |                          | Zinc finger protein MAGPIE                                                   |
| maker-1-augustus-gene-79.12-mRNA-1   | Japonica | Indica   |  | Os01g0242500 | OsR498G0100522400.01.T02 | D-aminoacyl-tRNA deacylase                                                   |
| maker-1-augustus-gene-79.16-mRNA-1   | Japonica | NA       |  | Os01g0242600 | OsR498G0100522600.01.T02 | C2 domain-containing protein (Fragment)                                      |
| maker-1-augustus-gene-79.2-mRNA-1    | Japonica | NA       |  | Os01g0242300 | OsR498G0100521900.01.T03 | Optic atrophy 3 protein                                                      |
| maker-1-augustus-gene-79.22-mRNA-1   | Japonica | Japonica |  | Os01g0243000 | OsR498G0100524200.01.T01 | GDSL esterase/lipase                                                         |
| maker-1-augustus-gene-79.24-mRNA-1   | Japonica | Indica   |  | Os01g0243200 | OsR498G0100525200.01.T01 | Folate-biopterin transporter like                                            |
| maker-1-augustus-gene-79.5-mRNA-1    | Japonica | NA       |  | Os01g0242900 | OsR498G0100523900.01.T01 | Ribosomal protein L18ae family                                               |
| maker-1-augustus-gene-79.8-mRNA-1    | Japonica | NA       |  |              |                          | P-loop nucleoside triphosphate hydrolases superfamily protein with Calponin  |
| maker-1-augustus-gene-80.50-mRNA-1   | Japonica | Japonica |  | Os01g0243900 | OsR498G0100529200.01.T01 | Zinc finger CCH domain-containing protein 4                                  |
| maker-1-augustus-gene-94.43-mRNA-1   | Japonica | NA       |  | Os01g0270300 | OsR498G0100632700.01.T01 | Peroxidase                                                                   |
| maker-1-augustus-gene-94.45-mRNA-1   | Japonica | NA       |  | Os01g0271000 | OsR498G0100633900.01.T01 | Mitochondrial inner membrane translocase subunit Tim17/Tim22/Tim23/pe        |
| maker-1-augustus-gene-94.55-mRNA-1   | Japonica | NA       |  | Os01g0270100 | OsR498G0100632000.01.T01 | Cysteine proteinase inhibitor                                                |
| maker-1-augustus-gene-94.57-mRNA-1   | Japonica | NA       |  | Os01g0271200 | OsR498G0100634200.01.T01 | Glutamyl-tRNA synthetase                                                     |
| maker-1-augustus-gene-94.59-mRNA-1   | Japonica | NA       |  | Os01g0271400 | OsR498G0100634400.01.T03 | ATP-dependent Clp protease proteolytic subunit                               |
| maker-1-augustus-gene-95.33-mRNA-1   | Japonica | NA       |  | Os01g0271500 | OsR498G0100634700.01.T03 | Ubiquitin-activating enzyme repeat                                           |
| maker-1-augustus-gene-95.37-mRNA-1   | Japonica | NA       |  | Os01g0272600 | OsR498G0100638100.01.T01 | Hydroxyproline O-arabinosyltransferase                                       |
| maker-1-augustus-gene-95.42-mRNA-1   | Japonica | NA       |  |              | OsR498G0100640700.01.T05 | DnaJ homolog subfamily C member 7                                            |
| maker-1-augustus-gene-95.48-mRNA-1   | Japonica | NA       |  |              | OsR498G0100635600.01.T01 | ARID domain-containing protein C08B11.3                                      |
| maker-1-augustus-gene-95.51-mRNA-1   | Japonica | NA       |  |              | OsR498G0100638400.01.T01 | Phytoecyanin domain-containing protein (Fragment)                            |
| maker-1-augustus-gene-95.53-mRNA-1   | Japonica | NA       |  |              |                          | Transglutaminase family protein                                              |
| maker-1-augustus-gene-95.58-mRNA-1   | Japonica | NA       |  | Os01g0273000 | OsR498G0100639400.01.T01 | Deleted in split hand/splt foot protein 1                                    |
| maker-1-augustus-gene-95.60-mRNA-1   | Japonica | NA       |  |              |                          |                                                                              |
| maker-1-augustus-gene-96.0-mRNA-1    | Japonica | NA       |  | Os01g0273800 | OsR498G0100642500.01.T01 | Flavin-containing monooxygenase                                              |
| maker-1-augustus-gene-96.10-mRNA-1   | Japonica | NA       |  |              | OsR498G0100647800.01.T01 | Transcription factor MYB105                                                  |
| maker-1-augustus-gene-96.2-mRNA-1    | Japonica | NA       |  |              | OsR498G0714022200.01.T01 |                                                                              |
| maker-1-augustus-gene-96.4-mRNA-1    | Japonica | NA       |  |              |                          | Ulp1 protease family, C-terminal catalytic domain containing protein, expres |
| maker-1-augustus-gene-96.6-mRNA-1    | Japonica | NA       |  | Os01g0274100 | OsR498G0100643300.01.T01 | Flavin-containing monooxygenase                                              |
| maker-1-augustus-gene-97.24-mRNA-1   | Japonica | NA       |  | Os01g0276100 | OsR498G0100653900.01.T05 | Isocitrate dehydrogenase [NAD] catalytic subunit 5, mitochondrial            |
| maker-1-augustus-gene-97.29-mRNA-1   | Japonica | NA       |  | Os01g0276300 | OsR498G0100654700.01.T01 | Embryonic protein DC-8                                                       |
| maker-1-augustus-gene-97.41-mRNA-1   | Japonica | NA       |  | Os01g0275600 | OsR498G0100651200.01.T03 | Argonaute                                                                    |
| maker-1-augustus-gene-97.48-mRNA-1   | Japonica | NA       |  |              |                          |                                                                              |
| maker-1-augustus-gene-97.55-mRNA-1   | Japonica | NA       |  | Os01g0276000 | OsR498G0100653000.01.T01 | 60S ribosomal protein L30                                                    |
| maker-1-augustus-gene-97.60-mRNA-1   | Japonica | NA       |  | Os01g0276200 | OsR498G0100654200.01.T01 | Mitochondrial import receptor subunit TOM40-1, N-terminally processed lik    |
| maker-1-augustus-gene-98.28-mRNA-1   | Japonica | NA       |  | Os01g0277700 | OsR498G0100658900.01.T01 | Fe(3+) dicitrate transport system permease fecC                              |
| maker-1-augustus-gene-98.31-mRNA-1   | Japonica | NA       |  | Os01g0277900 | OsR498G0100660500.01.T01 | J domain-containing protein (Fragment)                                       |
| maker-1-augustus-gene-98.34-mRNA-1   | Japonica | NA       |  | Os01g0276500 | OsR498G0100655200.01.T01 | Phosphoribosyl-AMP cyclohydrolase                                            |
| maker-1-augustus-gene-98.38-mRNA-1   | Japonica | NA       |  | Os01g0276700 | OsR498G0100655600.01.T01 | Pyruvate kinase                                                              |
| maker-1-augustus-gene-98.41-mRNA-1   | Japonica | NA       |  | Os01g0276800 | OsR498G0100656000.01.T01 | Glucosidase 2 subunit beta                                                   |
| maker-1-augustus-gene-98.47-mRNA-1   | Japonica | NA       |  | Os01g0277600 | OsR498G0100658600.01.T01 | Phospholipid-transporting ATPase                                             |
| maker-1-augustus-gene-99.28-mRNA-1   | Japonica | NA       |  |              |                          |                                                                              |
| maker-1-augustus-gene-99.33-mRNA-1   | Japonica | NA       |  | Os01g0278900 | OsR498G0100667700.01.T02 | 50S ribosomal protein 5 chloroplastic                                        |
| maker-1-augustus-gene-99.35-mRNA-1   | Japonica | NA       |  |              | OsR498G0100667900.01.T01 | CO(2)-response secreted protease                                             |
| maker-1-augustus-gene-99.37-mRNA-1   | Japonica | NA       |  | Os01g0279000 | OsR498G0100668100.01.T01 | S-acyltransferase                                                            |
| maker-1-augustus-gene-99.40-mRNA-1   | Japonica | NA       |  | Os01g0279100 | OsR498G0100668500.01.T01 | Magnesium-protoporphyrin IX monomethyl ester (oxidative) cyclase             |
| maker-1-augustus-gene-99.44-mRNA-1   | Japonica | NA       |  | Os01g0279200 | OsR498G0100668700.01.T02 | COP9 signalosome complex subunit                                             |
| maker-10-augustus-gene-105.10-mRNA-1 | Japonica | NA       |  | Os10g0430700 | OsR498G1018763700.01.T01 |                                                                              |

|                                      |          |          |           |              |                          |                                                                |
|--------------------------------------|----------|----------|-----------|--------------|--------------------------|----------------------------------------------------------------|
| maker-10-augustus-gene-105.21-mRNA-1 | Japonica | NA       |           | Os10g0430800 |                          |                                                                |
| maker-10-augustus-gene-105.27-mRNA-1 | Japonica | NA       |           |              | OsR498G1018763200.01.T03 | Cinnamyl alcohol dehydrogenase 7                               |
| maker-10-augustus-gene-105.30-mRNA-1 | Japonica | NA       | Kinase-TM | Os10g0430900 | OsR498G1018764400.01.T03 | Serine/threonine-protein kinase EDR1                           |
| maker-10-augustus-gene-105.4-mRNA-1  | Japonica | NA       |           | Os10g0430600 | OsR498G1018763500.01.T01 |                                                                |
| maker-10-augustus-gene-105.9-mRNA-1  | Japonica | NA       |           | Os10g0430700 | OsR498G1018763700.01.T03 |                                                                |
| maker-10-augustus-gene-106.0-mRNA-1  | Japonica | Indica   |           | Os10g0431000 | OsR498G1018765300.01.T01 | DWNN domain a CCHC-type zinc finger                            |
| maker-10-augustus-gene-106.13-mRNA-1 | Japonica | NA       | Kinase    | Os10g0431900 | OsR498G1018768400.01.T02 | Probable serine/threonine-protein kinase PBL16                 |
| maker-10-augustus-gene-106.16-mRNA-1 | Japonica | NA       |           | Os10g0432300 | OsR498G1018769200.01.T03 | TATA-box-binding protein isoform A                             |
| maker-10-augustus-gene-106.7-mRNA-1  | Japonica | Indica   |           | Os03g0159600 | OsR498G1018765500.01.T01 | Late embryogenesis abundant                                    |
| maker-10-augustus-gene-106.9-mRNA-1  | Japonica | NA       |           |              |                          | RNase I inhibitor protein 2                                    |
| maker-10-augustus-gene-108.44-mRNA-1 | Japonica | NA       |           | Os10g0437000 | OsR498G1018782300.01.T01 | Beta-glucuronosyltransferase GlcAT14A                          |
| maker-10-augustus-gene-108.48-mRNA-1 | Japonica | NA       |           | Os10g0437100 | OsR498G1018782800.01.T02 | Amino acid permease family protein, expressed                  |
| maker-10-augustus-gene-108.52-mRNA-1 | Japonica | NA       |           |              | OsR498G1018783200.01.T04 | HRDC domain-containing protein                                 |
| maker-10-augustus-gene-109.0-mRNA-1  | Japonica | NA       |           | Os10g0437500 | OsR498G1018785700.01.T01 | Usp domain-containing protein (Fragment)                       |
| maker-10-augustus-gene-109.16-mRNA-1 | Japonica | NA       |           | Os10g0438000 | OsR498G1018787000.01.T01 | FH protein interacting protein FIP2                            |
| maker-10-augustus-gene-109.19-mRNA-1 | Japonica | Japonica |           | Os10g0438300 | OsR498G1018787600.01.T01 |                                                                |
| maker-10-augustus-gene-109.2-mRNA-1  | Japonica | NA       |           | Os10g0437600 | OsR498G1018786300.01.T05 | Starch synthase, chloroplastic/amyloplastic                    |
| maker-10-augustus-gene-109.8-mRNA-1  | Japonica | NA       |           | Os10g0438100 | OsR498G1018787300.01.T01 | Skp1 family, dimerization domain-containing protein (Fragment) |
| maker-10-augustus-gene-110.38-mRNA-1 | Japonica | NA       |           |              | OsR498G1018792300.01.T04 | Splicing factor, CC1-like family protein, expressed            |
| maker-10-augustus-gene-110.45-mRNA-1 | Japonica | NA       |           |              | OsR498G1018794500.01.T01 | HMA domain-containing protein (Fragment)                       |
| maker-10-augustus-gene-111.36-mRNA-1 | Japonica | NA       |           | Os10g0441800 | OsR498G1018797700.01.T01 | Ras-related protein RABF1                                      |
| maker-10-augustus-gene-113.39-mRNA-1 | Japonica | NA       |           |              | OsR498G1018810900.01.T01 | WRC domain-containing protein                                  |
| maker-10-augustus-gene-113.41-mRNA-1 | Japonica | NA       |           |              |                          | Transmembrane protein like                                     |
| maker-10-augustus-gene-113.43-mRNA-1 | Japonica | NA       |           |              |                          | Transmembrane protein 8B                                       |
| maker-10-augustus-gene-113.51-mRNA-1 | Japonica | NA       |           | Os10g0445400 | OsR498G1018809400.01.T02 | E3 ubiquitin-protein ligase AIRP2                              |
| maker-10-augustus-gene-113.55-mRNA-1 | Japonica | Japonica |           | Os10g0446100 | OsR498G1018811400.01.T01 | WRC domain-containing protein                                  |
| maker-10-augustus-gene-116.37-mRNA-1 | Japonica | NA       |           | Os04g0166400 | OsR498G0407609800.01.T01 | ELM2 domain-containing protein                                 |
| maker-10-augustus-gene-116.39-mRNA-1 | Japonica | NA       |           | Os04g0165700 | OsR498G0407604600.01.T01 | Beta-cyanoalanine synthase                                     |
| maker-10-augustus-gene-116.46-mRNA-1 | Japonica | NA       |           | Os04g0166900 | OsR498G0407612300.01.T01 | F-box domain-containing protein                                |
| maker-10-augustus-gene-116.54-mRNA-1 | Japonica | NA       |           | Os04g0165600 | OsR498G0407604300.01.T04 | Mitochondrial inner membrane protease subunit 2                |
| maker-10-augustus-gene-117.46-mRNA-1 | Japonica | NA       |           | Os04g0165300 | OsR498G0407603300.01.T02 | ATG8-interacting protein 1                                     |
| maker-10-augustus-gene-117.53-mRNA-1 | Japonica | NA       |           |              |                          |                                                                |
| maker-10-augustus-gene-12.42-mRNA-1  | Japonica | NA       |           | Os10g0113100 | OsR498G1018038500.01.T01 | Non-functional NADPH-dependent codeinone reductase 2-like      |
| maker-10-augustus-gene-123.31-mRNA-1 | Japonica | NA       |           | Os05g0499400 | OsR498G0407563000.01.T01 | Peroxidase                                                     |
| maker-10-augustus-gene-123.33-mRNA-1 | Japonica | NA       |           |              | OsR498G0407560200.01.T01 | DUF4220 domain-containing protein (Fragment)                   |
| maker-10-augustus-gene-123.34-mRNA-1 | Japonica | NA       |           | Os04g0151900 | OsR498G0407559800.01.T01 | Cysteine dioxygenase                                           |
| maker-10-augustus-gene-127.41-mRNA-1 | Japonica | NA       | Kinase-TM | Os04g0125700 | OsR498G0407534800.01.T01 | Non-specific serine/threonine protein kinase                   |
| maker-10-augustus-gene-127.44-mRNA-1 | Japonica | NA       |           | Os03g0114600 | OsR498G0407534000.01.T01 | Calcineurin-like phosphoesterase family protein, putative      |
| maker-10-augustus-gene-127.50-mRNA-1 | Japonica | NA       |           |              | OsR498G0407531300.01.T01 | DUF4220 domain-containing protein (Fragment)                   |
| maker-10-augustus-gene-128.26-mRNA-1 | Japonica | NA       |           | Os04g0137100 | OsR498G0407528100.01.T01 | Pectate lyase                                                  |
| maker-10-augustus-gene-129.0-mRNA-1  | Japonica | NA       |           | Os04g0476100 | OsR498G0407524800.01.T01 | Amine oxidase                                                  |
| maker-10-augustus-gene-13.28-mRNA-1  | Japonica | NA       |           | Os10g0113900 | OsR498G1018041500.01.T01 | Deoxymugineic acid synthase 1-D                                |
| maker-10-augustus-gene-13.31-mRNA-1  | Japonica | NA       |           | Os10g0114300 | OsR498G1018042100.01.T03 | Non-functional NADPH-dependent codeinone reductase 2           |
| maker-10-augustus-gene-133.8-mRNA-1  | Japonica | NA       |           | Os04g0132300 | OsR498G0407513700.01.T03 | A1 cistron-splicing factor, AAR2                               |
| maker-10-augustus-gene-134.2-mRNA-1  | Japonica | NA       |           | Os04g0129900 | OsR498G0407510000.01.T01 | Dynamin-related protein 4C                                     |
| maker-10-augustus-gene-134.4-mRNA-1  | Japonica | NA       |           | Os04g0129600 | OsR498G0407508700.01.T01 | Lipoyl synthase                                                |
| maker-10-augustus-gene-134.6-mRNA-1  | Japonica | NA       |           | Os04g0129500 | OsR498G0407508500.01.T02 | Sec23/Sec24 protein transport family protein isoform 1         |
| maker-10-augustus-gene-136.28-mRNA-1 | Japonica | NA       |           | Os04g0127200 | OsR498G0407499700.01.T01 | Subtilisin-like protease SBT3.3                                |
| maker-10-augustus-gene-136.29-mRNA-1 | Japonica | NA       |           | Os04g0127300 | OsR498G0407499700.01.T01 | Subtilisin-like protease SBT3.3                                |
| maker-10-augustus-gene-138.12-mRNA-1 | Japonica | NA       |           |              | OsR498G0407495100.01.T01 | Jacalin-type lectin domain-containing protein (Fragment)       |
| maker-10-augustus-gene-138.3-mRNA-1  | Japonica | NA       |           | Os04g0127200 | OsR498G0407495300.01.T02 | Subtilisin-like protease                                       |
| maker-10-augustus-gene-138.4-mRNA-1  | Japonica | NA       |           |              |                          | Subtilisin-like protein protease SBT3.3                        |
| maker-10-augustus-gene-139.0-mRNA-1  | Japonica | NA       |           | Os04g0119500 | OsR498G0407488200.01.T01 | START domain-containing protein                                |
| maker-10-augustus-gene-139.17-mRNA-1 | Japonica | NA       |           | Os04g0120100 | OsR498G0407490700.01.T01 | Subtilase family protein, expressed                            |
| maker-10-augustus-gene-139.19-mRNA-1 | Japonica | NA       |           | Os04g0120000 | OsR498G0407490300.01.T02 | Subtilisin-like protein protease SBT3.7                        |
| maker-10-augustus-gene-139.21-mRNA-1 | Japonica | NA       | LRR-TM    |              | OsR498G0407494400.01.T01 | Protein kinase domain-containing protein                       |
| maker-10-augustus-gene-139.24-mRNA-1 | Japonica | NA       |           | Os04g0119400 | OsR498G0407487700.01.T01 | Pyruvate dehydrogenase E1 component subunit alpha              |
| maker-10-augustus-gene-139.26-mRNA-1 | Japonica | NA       |           | Os04g0119300 | OsR498G0305093300.01.T01 | DUF1990 domain-containing protein (Fragment)                   |
| maker-10-augustus-gene-139.28-mRNA-1 | Japonica | NA       |           | Os04g0119000 |                          |                                                                |
| maker-10-augustus-gene-139.30-mRNA-1 | Japonica | NA       | CC-NBS-TM | Os12g0246700 | OsR498G0407486900.01.T01 | NB-ARC domain containing protein, expressed                    |
| maker-10-augustus-gene-139.5-mRNA-1  | Japonica | NA       |           |              | OsR498G0306740100.01.T01 |                                                                |

|                                      |          |          |               |              |                          |                                                                             |
|--------------------------------------|----------|----------|---------------|--------------|--------------------------|-----------------------------------------------------------------------------|
| maker-10-augustus-gene-14.0-mRNA-1   | Japonica | NA       |               | Os10g0115550 | OsR498G1018044900.01.T01 | Gibberellin-regulated protein 12                                            |
| maker-10-augustus-gene-14.13-mRNA-1  | Japonica | NA       |               |              |                          |                                                                             |
| maker-10-augustus-gene-14.16-mRNA-1  | Japonica | NA       |               |              | OsR498G1018049000.01.T03 |                                                                             |
| maker-10-augustus-gene-14.3-mRNA-1   | Japonica | NA       |               |              | OsR498G1018048500.01.T01 | Troponin T                                                                  |
| maker-10-augustus-gene-14.7-mRNA-1   | Japonica | NA       |               | Os10g0115600 | OsR498G1018045600.01.T03 | U1 small nuclear ribonucleoprotein 70 kDa                                   |
| maker-10-augustus-gene-140.45-mRNA-1 | Japonica | NA       |               | Os04g0117200 | OsR498G0407483200.01.T03 | MAR-binding filament-like protein 1-1                                       |
| maker-10-augustus-gene-140.48-mRNA-1 | Japonica | NA       |               |              | OsR498G0407483000.01.T01 | ATP synthase subunit e, mitochondrial                                       |
| maker-10-augustus-gene-140.50-mRNA-1 | Japonica | NA       |               | Os04g0116900 | OsR498G0407482000.01.T01 | WEB family protein isoform A                                                |
| maker-10-augustus-gene-140.52-mRNA-1 | Japonica | NA       |               | Os04g0116200 | OsR498G0407478600.01.T01 |                                                                             |
| maker-10-augustus-gene-140.60-mRNA-1 | Japonica | NA       |               | Os04g0117800 | OsR498G0407484500.01.T01 | Amidase domain-containing protein (Fragment)                                |
| maker-10-augustus-gene-140.63-mRNA-1 | Japonica | NA       |               | Os04g0117600 | OsR498G0407484100.01.T01 | tRNA-dihydrouridine synthase                                                |
| maker-10-augustus-gene-142.0-mRNA-1  | Japonica | NA       |               | Os08g0230450 | OsR498G1221360100.01.T03 |                                                                             |
| maker-10-augustus-gene-142.3-mRNA-1  | Japonica | NA       | Kinase-TM     | Os01g0136400 | OsR498G0100125200.01.T04 | Putative serine/threonine-protein kinase                                    |
| maker-10-augustus-gene-143.0-mRNA-1  | Japonica | NA       |               | Os04g0112300 | OsR498G0407453400.01.T02 | tRNA (adenine(58)-N(1))-methyltransferase non-catalytic subunit TRM6        |
| maker-10-augustus-gene-143.6-mRNA-1  | Japonica | NA       |               | Os04g0112200 |                          | E2F-DP transcription factor                                                 |
| maker-10-augustus-gene-145.0-mRNA-1  | Japonica | NA       |               |              | OsR498G0407447800.01.T03 |                                                                             |
| maker-10-augustus-gene-146.37-mRNA-1 | Japonica | NA       |               |              | OsR498G0407441900.01.T01 | Alpha-humulene synthase                                                     |
| maker-10-augustus-gene-15.10-mRNA-1  | Japonica | NA       |               | Os10g0116900 | OsR498G1018051200.01.T01 | Hydroxyproline-rich glycoprotein family protein, putative, expressed        |
| maker-10-augustus-gene-15.19-mRNA-1  | Japonica | NA       |               | Os10g0118200 | OsR498G1018056400.01.T01 | Acetylserotonin O-methyltransferase 2                                       |
| maker-10-augustus-gene-15.5-mRNA-1   | Japonica | NA       |               | Os10g0117800 | OsR498G1018054500.01.T02 | G-protein alpha subunit, putative, expressed                                |
| maker-10-augustus-gene-156.4-mRNA-1  | Japonica | NA       |               |              |                          | Myozenin 1                                                                  |
| maker-10-augustus-gene-157.10-mRNA-1 | Japonica | NA       |               | Os10g0455800 |                          |                                                                             |
| maker-10-augustus-gene-157.12-mRNA-1 | Japonica | NA       | LRR           | Os10g0456200 | OsR498G1018837200.01.T01 | LRR repeat and ubiquitin-like domain-containing protein isoform X2          |
| maker-10-augustus-gene-157.13-mRNA-1 | Japonica | NA       |               |              |                          | LRR repeats and ubiquitin-like domain-containing protein                    |
| maker-10-augustus-gene-157.24-mRNA-1 | Japonica | NA       |               | Os10g0456600 | OsR498G1018838600.01.T01 | GTP-binding protein yptV3                                                   |
| maker-10-augustus-gene-157.4-mRNA-1  | Japonica | NA       |               |              |                          | Glutamate ammonia ligase                                                    |
| maker-10-augustus-gene-158.24-mRNA-1 | Japonica | Indica   |               | Os10g0457000 | OsR498G1018839900.01.T02 | Splicing factor 3B subunit like                                             |
| maker-10-augustus-gene-158.29-mRNA-1 | Japonica | NA       |               | Os10g0457400 | OsR498G1018841300.01.T01 | Shugoshin, C-terminal                                                       |
| maker-10-augustus-gene-158.46-mRNA-1 | Japonica | NA       |               | Os10g0456800 | OsR498G1018839000.01.T03 | RING finger and CHY zinc finger domain-containing protein 1                 |
| maker-10-augustus-gene-158.52-mRNA-1 | Japonica | NA       |               |              | OsR498G1018839200.01.T01 | Midasin                                                                     |
| maker-10-augustus-gene-158.55-mRNA-1 | Japonica | NA       |               |              | OsR498G1018839400.01.T05 | Midasin                                                                     |
| maker-10-augustus-gene-158.69-mRNA-1 | Japonica | NA       |               | Os10g0457500 | OsR498G1018841600.01.T01 | Inosine triphosphate pyrophosphatase                                        |
| maker-10-augustus-gene-159.7-mRNA-1  | Japonica | NA       |               |              |                          | ATP-dependent DNA helicase                                                  |
| maker-10-augustus-gene-16.34-mRNA-1  | Japonica | NA       |               |              | OsR498G1018061500.01.T02 | Formin-like protein 14                                                      |
| maker-10-augustus-gene-16.43-mRNA-1  | Japonica | NA       |               | Os10g0118800 |                          | Cytochrome b reductase 1                                                    |
| maker-10-augustus-gene-16.45-mRNA-1  | Japonica | NA       |               |              | OsR498G1018057400.01.T08 | p-loop containing nucleoside triphosphate hydrolases superfamily protein is |
| maker-10-augustus-gene-16.50-mRNA-1  | Japonica | NA       | Kinase-LRR-TM | Os10g0119200 | OsR498G1018061000.01.T01 | Putative LRR receptor-like serine/threonine-protein kinase                  |
| maker-10-augustus-gene-160.6-mRNA-1  | Japonica | Indica   |               | Os10g0461100 | OsR498G1018850800.01.T01 | PsbP family protein, expressed                                              |
| maker-10-augustus-gene-160.9-mRNA-1  | Japonica | NA       |               | Os10g0461100 | OsR498G1018853400.01.T01 | Photosystem II PsbP, oxygen evolving complex                                |
| maker-10-augustus-gene-162.53-mRNA-1 | Japonica | Indica   |               | Os10g0465900 | OsR498G1018865700.01.T02 | PfkB domain-containing protein                                              |
| maker-10-augustus-gene-162.65-mRNA-1 | Japonica | NA       |               | Os10g0464100 | OsR498G1018862000.01.T04 | WD repeat-containing protein 70                                             |
| maker-10-augustus-gene-162.69-mRNA-1 | Japonica | NA       |               | Os10g0464400 | OsR498G1018862400.01.T05 | Riboflavin kinase                                                           |
| maker-10-augustus-gene-162.86-mRNA-1 | Japonica | Indica   |               | Os10g0466000 | OsR498G1018866000.01.T03 | RPM1 interacting protein 13                                                 |
| maker-10-augustus-gene-163.24-mRNA-1 | Japonica | NA       |               | Os10g0466700 | OsR498G1018867600.01.T01 | Ribosomal protein L17                                                       |
| maker-10-augustus-gene-164.25-mRNA-1 | Japonica | NA       | Kinase-LRR-TM | Os10g0468500 | OsR498G1018872900.01.T01 | MDIS1-interacting receptor like kinase 2                                    |
| maker-10-augustus-gene-164.29-mRNA-1 | Japonica | Japonica | LRR-TM        | Os10g0469600 | OsR498G1018872900.01.T01 | MDIS1-interacting receptor like kinase 2                                    |
| maker-10-augustus-gene-165.0-mRNA-1  | Japonica | NA       |               | Os10g0470700 | OsR498G1018878300.01.T02 | Putative proton-dependent oligopeptide or low-affinity nitrate transporter  |
| maker-10-augustus-gene-165.3-mRNA-1  | Japonica | NA       |               |              | OsR498G1018878700.01.T04 |                                                                             |
| maker-10-augustus-gene-166.0-mRNA-1  | Japonica | NA       |               |              |                          | Cyanate hydratase                                                           |
| maker-10-augustus-gene-166.15-mRNA-1 | Japonica | NA       |               | Os10g0471400 | OsR498G1018883200.01.T03 | No pollen germination related 2                                             |
| maker-10-augustus-gene-166.17-mRNA-1 | Japonica | NA       |               | Os10g0471700 | OsR498G1018884800.01.T01 | Cyclin-dependent kinase inhibitor                                           |
| maker-10-augustus-gene-166.4-mRNA-1  | Japonica | NA       |               | Os10g0471100 | OsR498G1018881800.01.T01 | Aldehyde oxygenase (deformylating)                                          |
| maker-10-augustus-gene-166.9-mRNA-1  | Japonica | NA       |               |              | OsR498G1018883000.01.T02 | RNA helicase                                                                |
| maker-10-augustus-gene-167.0-mRNA-1  | Japonica | NA       |               | Os10g0472400 | OsR498G1018887500.01.T01 | DUF862 domain-containing protein (Fragment)                                 |
| maker-10-augustus-gene-167.13-mRNA-1 | Japonica | NA       |               | Os10g0473400 | OsR498G1018890800.01.T03 | Non-lysosomal glucosylceramidase                                            |
| maker-10-augustus-gene-167.19-mRNA-1 | Japonica | NA       |               | Os10g0474800 | OsR498G1018893600.01.T01 | Long-chain-alcohol oxidase                                                  |
| maker-10-augustus-gene-167.20-mRNA-1 | Japonica | Japonica |               | Os10g0474900 | OsR498G1018893600.01.T01 | Long-chain-alcohol oxidase                                                  |
| maker-10-augustus-gene-167.3-mRNA-1  | Japonica | NA       |               | Os10g0472900 | OsR498G1018889900.01.T01 | Very-long-chain 3-oxoacyl-CoA synthase                                      |
| maker-10-augustus-gene-167.5-mRNA-1  | Japonica | NA       | CC-LRR-NBS-TM | Os10g0474500 | OsR498G1018892300.01.T01 | Putative disease resistance protein RGA3                                    |
| maker-10-augustus-gene-167.6-mRNA-1  | Japonica | Japonica |               | Os10g0474600 | OsR498G1018892700.01.T01 | Putative disease resistance RPP13-like protein 1                            |
| maker-10-augustus-gene-168.34-mRNA-1 | Japonica | NA       |               |              |                          |                                                                             |

|                                      |          |          |           |              |                          |                                                                             |
|--------------------------------------|----------|----------|-----------|--------------|--------------------------|-----------------------------------------------------------------------------|
| maker-10-augustus-gene-168.35-mRNA-1 | Japonica | Japonica |           | Os10g0474933 | OsR498G1018894000.01.T01 | Putative polyprotein from transposon TNT                                    |
| maker-10-augustus-gene-168.44-mRNA-1 | Japonica | NA       | Kinase-TM | Os10g0476100 | OsR498G1018898700.01.T01 | serine/threonine-protein kinase tricornet isoform X1                        |
| maker-10-augustus-gene-168.50-mRNA-1 | Japonica | NA       |           | Os10g0474300 | OsR498G1018894000.01.T01 | Putative serine protease                                                    |
| maker-10-augustus-gene-168.53-mRNA-1 | Japonica | NA       |           | Os10g0474966 | OsR498G1018896600.01.T01 | Long-chain-alcohol oxidase                                                  |
| maker-10-augustus-gene-168.55-mRNA-1 | Japonica | NA       |           | Os10g0475000 |                          | Long-chain-alcohol oxidase                                                  |
| maker-10-augustus-gene-169.27-mRNA-1 | Japonica | NA       | Kinase    | Os10g0476300 | OsR498G1018899100.01.T01 | Casein kinase I isoform epsilon                                             |
| maker-10-augustus-gene-169.30-mRNA-1 | Japonica | NA       |           | Os10g0476600 | OsR498G1018900500.01.T03 | Serine/threonine-protein phosphatase 2A regulatory subunit B" subunit alpha |
| maker-10-augustus-gene-169.35-mRNA-1 | Japonica | NA       |           | Os10g0477000 | OsR498G1018901300.01.T01 | Exportin-4                                                                  |
| maker-10-augustus-gene-169.38-mRNA-1 | Japonica | NA       |           | Os10g0477100 | OsR498G1018901500.01.T05 | Putative methyltransferase PMT8                                             |
| maker-10-augustus-gene-169.43-mRNA-1 | Japonica | NA       |           | Os10g0476400 | OsR498G1018899600.01.T02 | Vacuolar protein sorting-associated protein 2                               |
| maker-10-augustus-gene-169.48-mRNA-1 | Japonica | NA       |           | Os09g0348800 | OsR498G1221562500.01.T02 | Proline rich 12b                                                            |
| maker-10-augustus-gene-17.37-mRNA-1  | Japonica | NA       |           | Os10g0123200 | OsR498G1018069300.01.T01 | F-box domain containing protein, expressed                                  |
| maker-10-augustus-gene-170.0-mRNA-1  | Japonica | NA       |           | Os10g0477600 | OsR498G1018903500.01.T01 | NAC transcription factor                                                    |
| maker-10-augustus-gene-170.10-mRNA-1 | Japonica | NA       |           | Os10g0478200 | OsR498G1018906500.01.T01 | Malate dehydrogenase                                                        |
| maker-10-augustus-gene-170.15-mRNA-1 | Japonica | Indica   |           | Os04g0630100 | OsR498G1018904200.01.T01 | Epimerase domain-containing protein (Fragment)                              |
| maker-10-augustus-gene-170.17-mRNA-1 | Japonica | NA       |           | Os10g0478000 | OsR498G1018905000.01.T01 | ALOG domain transcriptional regulator family protein 4-2B                   |
| maker-10-augustus-gene-170.18-mRNA-1 | Japonica | NA       |           | Os10g0478100 | OsR498G1018906000.01.T05 | Chloroplast J-like domain 1                                                 |
| maker-10-augustus-gene-170.2-mRNA-1  | Japonica | NA       |           |              |                          | Nuclear transportin                                                         |
| maker-10-augustus-gene-170.24-mRNA-1 | Japonica | NA       |           | Os10g0478300 | OsR498G1018907600.01.T01 | Transcription factor MYB4                                                   |
| maker-10-augustus-gene-171.0-mRNA-1  | Japonica | Indica   |           | Os10g0478900 | OsR498G1018910500.01.T01 |                                                                             |
| maker-10-augustus-gene-171.10-mRNA-1 | Japonica | NA       |           | Os10g0479700 | OsR498G1018913100.01.T03 | TPT domain-containing protein                                               |
| maker-10-augustus-gene-171.12-mRNA-1 | Japonica | NA       |           |              | OsR498G1018914100.01.T03 | START domain-containing protein                                             |
| maker-10-augustus-gene-171.19-mRNA-1 | Japonica | NA       |           | Os10g0478500 |                          | MATH domain-containing protein (Fragment)                                   |
| maker-10-augustus-gene-171.22-mRNA-1 | Japonica | NA       |           | Os10g0478600 | OsR498G1018910000.01.T05 |                                                                             |
| maker-10-augustus-gene-171.3-mRNA-1  | Japonica | Japonica |           | Os10g0479200 | OsR498G1018911300.01.T01 | Putative membrane-associated salt-inducible protein                         |
| maker-10-augustus-gene-171.7-mRNA-1  | Japonica | NA       |           | Os10g0479500 | OsR498G1018912700.01.T01 | Cytokinin riboside 5'-monophosphate phosphoribohydrolase                    |
| maker-10-augustus-gene-172.21-mRNA-1 | Japonica | NA       |           | Os10g0480200 | OsR498G1018916700.01.T06 | Rolled leaf 2                                                               |
| maker-10-augustus-gene-172.27-mRNA-1 | Japonica | NA       |           | Os10g0480500 | OsR498G1018917600.01.T02 | Double-stranded RNA-binding protein 6                                       |
| maker-10-augustus-gene-173.42-mRNA-1 | Japonica | NA       |           | Os10g0481100 | OsR498G1018923100.01.T01 | Aquaporin PIP2-1                                                            |
| maker-10-augustus-gene-173.44-mRNA-1 | Japonica | NA       |           | Os10g0481500 | OsR498G1018924900.01.T01 | Flotillin-like protein 1                                                    |
| maker-10-augustus-gene-173.46-mRNA-1 | Japonica | Indica   |           | Os10g0481400 | OsR498G1018923600.01.T02 | Histone acetyltransferase                                                   |
| maker-10-augustus-gene-173.48-mRNA-1 | Japonica | NA       |           |              | OsR498G1018923800.01.T04 | RING-CH-type domain-containing protein                                      |
| maker-10-augustus-gene-173.52-mRNA-1 | Japonica | NA       |           |              |                          |                                                                             |
| maker-10-augustus-gene-173.54-mRNA-1 | Japonica | Indica   |           | Os10g0481500 | OsR498G1018930000.01.T01 | Flotillin-like protein 3                                                    |
| maker-10-augustus-gene-173.56-mRNA-1 | Japonica | Indica   |           | Os10g0481500 | OsR498G1018931000.01.T01 | Flotillin-like protein 3                                                    |
| maker-10-augustus-gene-173.58-mRNA-1 | Japonica | NA       |           | Os10g0482900 | OsR498G1018931200.01.T01 | Dishevelled                                                                 |
| maker-10-augustus-gene-174.0-mRNA-1  | Japonica | Indica   | Kinase-TM | Os10g0483400 | OsR498G1120115000.01.T01 | Protein kinase domain containing protein, expressed                         |
| maker-10-augustus-gene-174.12-mRNA-1 | Japonica | NA       |           |              | OsR498G1018931800.01.T04 | Nascent polypeptide-associated complex subunit beta                         |
| maker-10-augustus-gene-174.14-mRNA-1 | Japonica | NA       |           | Os10g0483100 | OsR498G1018932000.01.T01 | Nascent polypeptide-associated complex subunit beta                         |
| maker-10-augustus-gene-174.16-mRNA-1 | Japonica | NA       |           | Os10g0484400 | OsR498G1018936400.01.T01 | Ribosomal protein L18/L5                                                    |
| maker-10-augustus-gene-174.18-mRNA-1 | Japonica | NA       |           | Os10g0484700 | OsR498G1018937800.01.T01 | Kynurenine--oxoglutarate transaminase                                       |
| maker-10-augustus-gene-174.23-mRNA-1 | Japonica | NA       |           | Os10g0485000 | OsR498G1018938800.01.T03 | Pre-mRNA-processing protein 40C                                             |
| maker-10-augustus-gene-174.27-mRNA-1 | Japonica | Indica   |           | Os10g0485100 | OsR498G1018939200.01.T03 | Thioredoxin domain-containing protein                                       |
| maker-10-augustus-gene-174.3-mRNA-1  | Japonica | NA       |           | Os10g0483500 | OsR498G1018934100.01.T02 | Cytokinin dehydrogenase                                                     |
| maker-10-augustus-gene-174.6-mRNA-1  | Japonica | Indica   |           | Os10g0484800 | OsR498G1018938300.01.T01 | Chalcone and stilbene synthases, N-terminal domain containing protein, exp  |
| maker-10-augustus-gene-174.9-mRNA-1  | Japonica | NA       |           | Os10g0483000 | OsR498G1018931800.01.T03 | Nascent polypeptide-associated complex subunit beta                         |
| maker-10-augustus-gene-175.0-mRNA-1  | Japonica | NA       |           |              | OsR498G1018939300.01.T02 | Protein EXECUTER 1 chloroplastic                                            |
| maker-10-augustus-gene-175.14-mRNA-1 | Japonica | NA       |           | Os10g0486000 | OsR498G1018941500.01.T02 | HD domain containing protein, expressed                                     |
| maker-10-augustus-gene-175.17-mRNA-1 | Japonica | NA       |           |              |                          | Mitosis protein YLS8                                                        |
| maker-10-augustus-gene-175.19-mRNA-1 | Japonica | NA       | TPR1      | Os10g0486900 | OsR498G1018945500.01.T01 | Tetratricopeptide repeat protein 1                                          |
| maker-10-augustus-gene-175.22-mRNA-1 | Japonica | Indica   |           | Os10g0487200 | OsR498G1018945900.01.T01 |                                                                             |
| maker-10-augustus-gene-175.24-mRNA-1 | Japonica | NA       |           | Os10g0487300 | OsR498G1018946300.01.T01 | nijmegen breakage syndrome 1 protein isoform X1                             |
| maker-10-augustus-gene-175.28-mRNA-1 | Japonica | NA       |           |              | OsR498G1018940800.01.T02 |                                                                             |
| maker-10-augustus-gene-175.30-mRNA-1 | Japonica | NA       |           | Os10g0485900 | OsR498G1018941400.01.T01 |                                                                             |
| maker-10-augustus-gene-175.32-mRNA-1 | Japonica | NA       |           | Os10g0486100 | OsR498G1018941800.01.T01 | Cytochrome P450 family protein, expressed                                   |
| maker-10-augustus-gene-175.34-mRNA-1 | Japonica | Japonica |           | Os10g0486300 | OsR498G1018943600.01.T02 | C2H2-type domain-containing protein                                         |
| maker-10-augustus-gene-175.6-mRNA-1  | Japonica | NA       |           | Os10g0485500 | OsR498G1018940100.01.T01 | LysM domain containing protein, expressed                                   |
| maker-10-augustus-gene-175.8-mRNA-1  | Japonica | NA       |           |              |                          | Endoribonuclease Dicer b                                                    |
| maker-10-augustus-gene-176.30-mRNA-1 | Japonica | NA       |           | Os10g0487500 | OsR498G1018946700.01.T02 | SMAP domain-containing protein                                              |
| maker-10-augustus-gene-176.33-mRNA-1 | Japonica | NA       |           | Os10g0487600 | OsR498G1018946900.01.T04 | SMAP domain-containing protein                                              |
| maker-10-augustus-gene-176.40-mRNA-1 | Japonica | NA       |           | Os10g0488100 |                          | Prefoldin alpha subunit                                                     |

|                                      |          |          |           |              |                          |                                                                             |
|--------------------------------------|----------|----------|-----------|--------------|--------------------------|-----------------------------------------------------------------------------|
| maker-10-augustus-gene-176.44-mRNA-1 | Japonica | NA       |           | Os10g0488300 | OsR498G1018947300.01.T04 | Vacuolar protein sorting-associated protein 52 A                            |
| maker-10-augustus-gene-176.47-mRNA-1 | Japonica | NA       |           |              |                          | Myosin motor domain-containing protein                                      |
| maker-10-augustus-gene-177.0-mRNA-1  | Japonica | NA       |           | Os10g0489100 | OsR498G1018951100.01.T01 | PrmA domain-containing protein                                              |
| maker-10-augustus-gene-177.11-mRNA-1 | Japonica | NA       |           | Os10g0489200 | OsR498G1018951400.01.T02 | DNA ligase                                                                  |
| maker-10-augustus-gene-177.18-mRNA-1 | Japonica | NA       |           | Os10g0489500 | OsR498G1018952600.01.T01 | Terpene synthase family, metal binding domain containing protein, expressed |
| maker-10-augustus-gene-177.6-mRNA-1  | Japonica | NA       |           |              | OsR498G1018955900.01.T01 | CDT1 domain-containing protein (Fragment)                                   |
| maker-10-augustus-gene-177.8-mRNA-1  | Japonica | NA       |           | Os10g0489000 | OsR498G1018950800.01.T03 | GRAM domain containing protein, expressed                                   |
| maker-10-augustus-gene-178.40-mRNA-1 | Japonica | NA       |           | Os10g0491000 | OsR498G1018957900.01.T01 | Basic secretory protease                                                    |
| maker-10-augustus-gene-178.42-mRNA-1 | Japonica | NA       |           | Os10g0491900 | OsR498G1018960700.01.T01 | G patch domain and ankyrin repeat-containing protein 1                      |
| maker-10-augustus-gene-178.46-mRNA-1 | Japonica | NA       |           | Os10g0492600 | OsR498G1018963100.01.T01 | Aquaporin TIP                                                               |
| maker-10-augustus-gene-178.48-mRNA-1 | Japonica | NA       |           |              | OsR498G1018963700.01.T01 | Alpha-galactosidase                                                         |
| maker-10-augustus-gene-178.58-mRNA-1 | Japonica | NA       |           |              | OsR498G1018961200.01.T01 | Chloroplast inner envelope protein, putative, expressed                     |
| maker-10-augustus-gene-178.64-mRNA-1 | Japonica | NA       |           | Os10g0492200 | OsR498G1018962000.01.T03 | Glycosyltransferase, putative, expressed                                    |
| maker-10-augustus-gene-178.66-mRNA-1 | Japonica | NA       |           | Os10g0492300 | OsR498G1018962600.01.T01 | Protein, chloroplastic                                                      |
| maker-10-augustus-gene-178.72-mRNA-1 | Japonica | Indica   |           | Os10g0492800 | OsR498G1018963400.01.T02 | Metallophos domain-containing protein (Fragment)                            |
| maker-10-augustus-gene-179.11-mRNA-1 | Japonica | NA       |           |              | OsR498G1018968700.01.T02 | WAT1-related protein, chloroplastic isoform A                               |
| maker-10-augustus-gene-179.15-mRNA-1 | Japonica | Japonica |           | Os10g0494200 | OsR498G0306568200.01.T03 | Probable N-acetyl-gamma-glutamyl-phosphate reductase, chloroplastic         |
| maker-10-augustus-gene-179.18-mRNA-1 | Japonica | NA       |           | Os10g0494300 | OsR498G1018972100.01.T02 | ABC-2 type transporter family protein, expressed                            |
| maker-10-augustus-gene-179.21-mRNA-1 | Japonica | NA       |           | Os10g0494500 | OsR498G1018972500.01.T01 | RING-type E3 ubiquitin transferase                                          |
| maker-10-augustus-gene-179.24-mRNA-1 | Japonica | NA       |           | Os10g0495000 | OsR498G1018975500.01.T02 | KH domain containing protein, expressed                                     |
| maker-10-augustus-gene-179.27-mRNA-1 | Japonica | NA       |           | Os10g0494000 | OsR498G1018969000.01.T01 | (RS)-norocloaurine 6-O-methyltransferase-like isoform 1                     |
| maker-10-augustus-gene-179.33-mRNA-1 | Japonica | NA       |           | Os10g0494800 | OsR498G1018972800.01.T04 | Katanin p80 WD40 repeat-containing subunit B1 homolog                       |
| maker-10-augustus-gene-179.7-mRNA-1  | Japonica | NA       |           | Os10g0493800 | OsR498G1018968500.01.T04 | Small nuclear RNA activating complex (SNAPc), subunit SNAP                  |
| maker-10-augustus-gene-18.0-mRNA-1   | Japonica | Japonica |           | Os10g0124000 | OsR498G1018070300.01.T01 | U4/U6 small nuclear ribonucleoprotein SNU13                                 |
| maker-10-augustus-gene-18.3-mRNA-1   | Japonica | Japonica |           | Os10g0124100 | OsR498G1018070700.01.T01 |                                                                             |
| maker-10-augustus-gene-18.5-mRNA-1   | Japonica | NA       |           |              | OsR498G1018071200.01.T01 | NB-ARC domain containing protein                                            |
| maker-10-augustus-gene-18.8-mRNA-1   | Japonica | NA       |           | Os10g0124700 | OsR498G1018071800.01.T01 | F-box domain containing protein, expressed                                  |
| maker-10-augustus-gene-180.43-mRNA-1 | Japonica | NA       |           | Os10g0494950 | OsR498G1018972900.01.T01 | Sox C-terminal domain-containing protein                                    |
| maker-10-augustus-gene-180.46-mRNA-1 | Japonica | NA       |           | Os10g0495000 | OsR498G1018975500.01.T01 | Nucleic acid binding protein                                                |
| maker-10-augustus-gene-180.51-mRNA-1 | Japonica | Indica   |           | Os04g0678200 | OsR498G1018979500.01.T01 | Fiber protein Fb34                                                          |
| maker-10-augustus-gene-180.53-mRNA-1 | Japonica | Indica   |           | Os10g0496900 | OsR498G1018982300.01.T01 | NADPH-protochlorophyllide oxidoreductase                                    |
| maker-10-augustus-gene-180.57-mRNA-1 | Japonica | NA       |           | Os10g0495300 | OsR498G1018978600.01.T01 | ALG-2 interacting protein like                                              |
| maker-10-augustus-gene-180.58-mRNA-1 | Japonica | NA       |           | Os10g0495400 | OsR498G1018978800.01.T02 | Rf1 protein, mitochondrial, putative, expressed                             |
| maker-10-augustus-gene-180.67-mRNA-1 | Japonica | NA       |           |              | OsR498G1018979200.01.T01 | Nucleolar complex protein 2                                                 |
| maker-10-augustus-gene-180.74-mRNA-1 | Japonica | NA       |           |              | OsR498G1018979400.01.T01 | DNA-directed RNA polymerase subunit beta                                    |
| maker-10-augustus-gene-180.82-mRNA-1 | Japonica | NA       |           |              | OsR498G1018980800.01.T01 |                                                                             |
| maker-10-augustus-gene-180.84-mRNA-1 | Japonica | Indica   |           | Os10g0493600 | OsR498G1018981000.01.T01 | Glycosyl hydrolase, family 13, all-beta                                     |
| maker-10-augustus-gene-181.0-mRNA-1  | Japonica | NA       |           | Os10g0497000 | OsR498G1018982700.01.T05 | WAPL (Wings apart-like protein regulation of heterochromatin) protein       |
| maker-10-augustus-gene-181.1-mRNA-1  | Japonica | NA       |           | Os10g0497100 | OsR498G1018982900.01.T01 | 1-acyl-sn-glycerol-3-phosphate acyltransferase                              |
| maker-10-augustus-gene-181.2-mRNA-1  | Japonica | NA       |           | Os10g0497300 | OsR498G1018983100.01.T03 | Rf1 protein, mitochondrial, putative, expressed                             |
| maker-10-augustus-gene-181.28-mRNA-1 | Japonica | NA       |           | Os10g0495000 | OsR498G1018975500.01.T01 | Nucleic acid binding protein                                                |
| maker-10-augustus-gene-181.3-mRNA-1  | Japonica | NA       |           |              | OsR498G1018984100.01.T06 | Rf1 protein, mitochondrial, putative, expressed                             |
| maker-10-augustus-gene-181.34-mRNA-1 | Japonica | NA       | Kinase-TM | Os10g0497600 | OsR498G1018985300.01.T01 | Putative serine/threonine-protein kinase                                    |
| maker-10-augustus-gene-181.39-mRNA-1 | Japonica | NA       |           | Os10g0497700 | OsR498G1018985500.01.T04 | COBRA-like protein 3                                                        |
| maker-10-augustus-gene-181.43-mRNA-1 | Japonica | NA       |           | Os10g0497800 | OsR498G1018985700.01.T02 | Prolyl 4-hydroxylase alpha subunit                                          |
| maker-10-augustus-gene-181.47-mRNA-1 | Japonica | Japonica |           | Os10g0497900 | OsR498G1018985900.01.T02 | LanC-like protein 2                                                         |
| maker-10-augustus-gene-181.50-mRNA-1 | Japonica | NA       |           | Os10g0498200 | OsR498G1018986700.01.T01 | Hydrolase, alpha/beta fold family protein, expressed                        |
| maker-10-augustus-gene-181.53-mRNA-1 | Japonica | NA       |           | Os10g0498300 | OsR498G1018986900.01.T01 | AB hydrolase-1 domain-containing protein (Fragment)                         |
| maker-10-augustus-gene-181.56-mRNA-1 | Japonica | NA       |           | Os10g0498000 | OsR498G1018986200.01.T01 | Soluble epoxide hydrolase / lipid-phosphate phosphatase                     |
| maker-10-augustus-gene-182.10-mRNA-1 | Japonica | NA       |           |              | OsR498G1018988500.01.T05 | Mediator of RNA polymerase II transcription subunit 16 isoform X2           |
| maker-10-augustus-gene-182.16-mRNA-1 | Japonica | Indica   |           | Os10g0499400 | OsR498G1018991100.01.T01 | CBS domain-containing protein CBSX5                                         |
| maker-10-augustus-gene-182.19-mRNA-1 | Japonica | NA       |           | Os10g0499600 |                          | Protein NEOXANTHIN-DEFICIENT 1                                              |
| maker-10-augustus-gene-182.22-mRNA-1 | Japonica | NA       |           | Os10g0500000 | OsR498G1018993300.01.T01 | E3 ubiquitin-protein ligase SHPRH                                           |
| maker-10-augustus-gene-182.27-mRNA-1 | Japonica | NA       |           | Os10g0500500 | OsR498G1018993700.01.T01 | Structural constituent of ribosome, putative                                |
| maker-10-augustus-gene-182.29-mRNA-1 | Japonica | NA       |           | Os10g0500600 | OsR498G1018994500.01.T03 | Monothiol glutaredoxin-S11                                                  |
| maker-10-augustus-gene-182.3-mRNA-1  | Japonica | NA       |           | Os10g0498700 | OsR498G1018988100.01.T04 | Mediator of RNA polymerase II transcription subunit                         |
| maker-10-augustus-gene-182.33-mRNA-1 | Japonica | Indica   |           | Os10g0500700 | OsR498G1018994500.01.T06 | Monothiol glutaredoxin                                                      |
| maker-10-augustus-gene-182.35-mRNA-1 | Japonica | Japonica |           | Os10g0501000 | OsR498G1018995300.01.T01 | Pentatricopeptide, putative, expressed                                      |
| maker-10-augustus-gene-182.37-mRNA-1 | Japonica | NA       |           | Os10g0498900 | OsR498G1018988800.01.T01 | Microtubule-associated protein RP/EB family member 3                        |
| maker-10-augustus-gene-182.39-mRNA-1 | Japonica | NA       |           |              |                          | Transcription factor RAX3                                                   |
| maker-10-augustus-gene-182.41-mRNA-1 | Japonica | Indica   |           | Os08g0248700 | OsR498G1018992400.01.T01 | Transcription factor MYB36                                                  |

|                                      |          |          |        |              |                          |                                                                           |
|--------------------------------------|----------|----------|--------|--------------|--------------------------|---------------------------------------------------------------------------|
| maker-10-augustus-gene-182.43-mRNA-1 | Japonica | NA       |        | Os10g0500400 | OsR498G1018993600.01.T01 | Acyl-CoA N-acyltransferases (NAT) superfamily protein                     |
| maker-10-augustus-gene-183.40-mRNA-1 | Japonica | Indica   |        | Os10g0501300 | OsR498G1018995300.01.T01 | Pentatricopeptide, putative, expressed                                    |
| maker-10-augustus-gene-183.42-mRNA-1 | Japonica | NA       |        | Os10g0501300 | OsR498G1018995500.01.T01 | Pentatricopeptide repeat-containing protein mitochondrial                 |
| maker-10-augustus-gene-183.44-mRNA-1 | Japonica | NA       |        | Os10g0501500 | OsR498G1018997100.01.T01 | Calcium uniporter protein (Fragment)                                      |
| maker-10-augustus-gene-183.47-mRNA-1 | Japonica | NA       |        | Os10g0501900 | OsR498G1018998500.01.T01 | Tetratricopeptide repeat (TPR)-like superfamily protein                   |
| maker-10-augustus-gene-183.49-mRNA-1 | Japonica | NA       |        | Os10g0502000 | OsR498G1018998800.01.T01 | Thylakoid lumenal 17 protein, chloroplastic                               |
| maker-10-augustus-gene-183.51-mRNA-1 | Japonica | NA       |        | Os10g0502400 | OsR498G1019000200.01.T01 | Glutamyl-tRNA reductase                                                   |
| maker-10-augustus-gene-183.53-mRNA-1 | Japonica | NA       |        | Os10g0502500 | OsR498G1019000800.01.T01 | Cytochrome b5 heme-binding domain-containing protein (Fragment)           |
| maker-10-augustus-gene-183.56-mRNA-1 | Japonica | NA       |        | Os10g0502600 | OsR498G1019001200.01.T04 | Membrane steroid-binding protein 1                                        |
| maker-10-augustus-gene-183.58-mRNA-1 | Japonica | NA       |        | Os10g0502900 | OsR498G1019001400.01.T02 | F-box/LRR-repeat protein At3g48880                                        |
| maker-10-augustus-gene-183.61-mRNA-1 | Japonica | Japonica |        | Os10g0503100 | OsR498G0204401000.01.T01 | LIM domain-containing protein PLIM2b                                      |
| maker-10-augustus-gene-184.0-mRNA-1  | Japonica | NA       |        | Os10g0503500 | OsR498G1019003300.01.T01 | Malic enzyme                                                              |
| maker-10-augustus-gene-184.15-mRNA-1 | Japonica | NA       |        | Os10g0503600 | OsR498G1019004000.01.T01 | Tetraspanin-10                                                            |
| maker-10-augustus-gene-184.19-mRNA-1 | Japonica | NA       |        | Os10g0503700 | OsR498G1019004200.01.T01 | DEAD-box ATP-dependent RNA helicase                                       |
| maker-10-augustus-gene-184.23-mRNA-1 | Japonica | Indica   |        | Os02g0824500 | OsR498G1019004800.01.T01 | Remorin                                                                   |
| maker-10-augustus-gene-184.25-mRNA-1 | Japonica | NA       |        | Os10g0504200 | OsR498G1019005800.01.T01 | Ascorbate-specific transmembrane electron transporter 2                   |
| maker-10-augustus-gene-184.7-mRNA-1  | Japonica | NA       |        | Os10g0504600 | OsR498G1019006300.01.T01 | C2 NT-type domain-containing protein (Fragment)                           |
| maker-10-augustus-gene-185.37-mRNA-1 | Japonica | NA       |        | Os10g0505900 | OsR498G1019008300.01.T01 | Low-temperature-induced 65 kDa protein                                    |
| maker-10-augustus-gene-185.39-mRNA-1 | Japonica | NA       |        |              |                          | Valyl-tRNA synthetase                                                     |
| maker-10-augustus-gene-185.42-mRNA-1 | Japonica | NA       |        |              |                          | COP9 signalosome complex subunit 6                                        |
| maker-10-augustus-gene-185.43-mRNA-1 | Japonica | NA       |        |              |                          | COP9 signalosome complex subunit 6                                        |
| maker-10-augustus-gene-185.50-mRNA-1 | Japonica | NA       |        |              | OsR498G1019011400.01.T01 |                                                                           |
| maker-10-augustus-gene-185.52-mRNA-1 | Japonica | NA       |        | Os10g0506100 | OsR498G1019009000.01.T02 | HMA domain-containing protein (Fragment)                                  |
| maker-10-augustus-gene-185.54-mRNA-1 | Japonica | NA       |        | Os10g0506800 | OsR498G1019010000.01.T02 | SET and MYND domain-containing protein 4                                  |
| maker-10-augustus-gene-186.25-mRNA-1 | Japonica | Indica   |        | Os01g0100400 | OsR498G1019013500.01.T01 | Monocopper oxidase-like protein SKU5                                      |
| maker-10-augustus-gene-186.28-mRNA-1 | Japonica | NA       |        | Os10g0508400 | OsR498G1019015500.01.T01 | Methionine aminopeptidase                                                 |
| maker-10-augustus-gene-186.33-mRNA-1 | Japonica | Indica   |        | Os10g0507600 | OsR498G1019011800.01.T01 | MSP domain containing protein, expressed                                  |
| maker-10-augustus-gene-186.37-mRNA-1 | Japonica | NA       |        | Os10g0507800 | OsR498G1019013400.01.T01 | Chaperone protein like                                                    |
| maker-10-augustus-gene-186.43-mRNA-1 | Japonica | Japonica |        | Os10g0508300 | OsR498G1019015000.01.T01 | C2C2-YABBY-transcription factor 12                                        |
| maker-10-augustus-gene-187.0-mRNA-1  | Japonica | Japonica |        | Os10g0508600 | OsR498G1019015900.01.T01 | Protein jagunal like                                                      |
| maker-10-augustus-gene-187.10-mRNA-1 | Japonica | NA       |        |              | OsR498G1019018100.01.T01 | Plastid-lipid-associated protein 10                                       |
| maker-10-augustus-gene-187.14-mRNA-1 | Japonica | NA       |        | Os10g0510000 | OsR498G1019021500.01.T02 | Actin                                                                     |
| maker-10-augustus-gene-187.16-mRNA-1 | Japonica | Japonica |        | Os10g0508500 | OsR498G1019015800.01.T02 | Tubulin-specific chaperone D                                              |
| maker-10-augustus-gene-187.22-mRNA-1 | Japonica | NA       |        | Os10g0509800 |                          |                                                                           |
| maker-10-augustus-gene-187.3-mRNA-1  | Japonica | Indica   |        | Os10g0509000 | OsR498G1019017300.01.T07 | Endonuclease MutS2 isoform X1                                             |
| maker-10-augustus-gene-187.9-mRNA-1  | Japonica | NA       |        | Os10g0509100 | OsR498G1019017900.01.T05 | Cyclic AMP-responsive element-binding 3                                   |
| maker-10-augustus-gene-188.13-mRNA-1 | Japonica | NA       |        |              | OsR498G1019028300.01.T01 | Zinc finger CCH domain-containing protein 44                              |
| maker-10-augustus-gene-188.19-mRNA-1 | Japonica | Japonica |        | Os10g0510700 | OsR498G1019025000.01.T01 | Calcium protein ( calmodulin-dependent protein kinase homolog  CaM kinase |
| maker-10-augustus-gene-188.25-mRNA-1 | Japonica | Japonica |        | Os10g0512100 | OsR498G1019028800.01.T02 | Putative DUF26 domain receptor-like protein kinase                        |
| maker-10-augustus-gene-188.8-mRNA-1  | Japonica | Indica   |        | Os10g0511400 | OsR498G1019027700.01.T03 | Prolyl carboxypeptidase like protein, putative, expressed                 |
| maker-10-augustus-gene-189.0-mRNA-1  | Japonica | NA       |        | Os10g0512400 | OsR498G1019030000.01.T01 | Ferulate 5-hydroxylase                                                    |
| maker-10-augustus-gene-189.12-mRNA-1 | Japonica | NA       |        |              | OsR498G1019031400.01.T01 | Aquaporin NIP                                                             |
| maker-10-augustus-gene-189.2-mRNA-1  | Japonica | NA       |        | Os10g0512700 | OsR498G1019030400.01.T01 | SH3 domain-containing protein 2                                           |
| maker-10-augustus-gene-189.7-mRNA-1  | Japonica | NA       |        |              | OsR498G1019030600.01.T03 | Kinesin-like protein KIN-7D mitochondrial                                 |
| maker-10-augustus-gene-19.32-mRNA-1  | Japonica | NA       |        |              | OsR498G1018073600.01.T01 | F-box domain containing protein, expressed                                |
| maker-10-augustus-gene-19.34-mRNA-1  | Japonica | NA       |        |              | OsR498G1018073800.01.T01 | F-box domain containing protein, expressed                                |
| maker-10-augustus-gene-19.36-mRNA-1  | Japonica | Japonica |        | Os10g0126500 | OsR498G1018080600.01.T01 | F-box domain containing protein, expressed                                |
| maker-10-augustus-gene-19.38-mRNA-1  | Japonica | NA       |        | Os10g0126600 | OsR498G1018081000.01.T01 | F-box domain containing protein, expressed                                |
| maker-10-augustus-gene-19.40-mRNA-1  | Japonica | NA       |        | Os10g0126700 | OsR498G1018081200.01.T01 | F-box domain containing protein, expressed                                |
| maker-10-augustus-gene-190.57-mRNA-1 | Japonica | NA       |        | Os10g0516100 | OsR498G1019036300.01.T01 | Glycine cleavage system H protein, mitochondrial                          |
| maker-10-augustus-gene-190.59-mRNA-1 | Japonica | Indica   |        | Os10g0516300 | OsR498G1019038500.01.T07 | Electron transfer flavoprotein-ubiquinone oxidoreductase                  |
| maker-10-augustus-gene-190.66-mRNA-1 | Japonica | Indica   | Kinase | Os03g0113000 | OsR498G1019036800.01.T01 | Putative receptor protein kinase                                          |
| maker-10-augustus-gene-191.0-mRNA-1  | Japonica | NA       |        | Os10g0516800 | OsR498G1019043100.01.T01 | Sphingoid long-chain bases kinase 1                                       |
| maker-10-augustus-gene-191.13-mRNA-1 | Japonica | NA       |        | Os10g0516600 | OsR498G1019042200.01.T01 | Beta-1,3-N-acetylglucosaminyltransferase lunatic fringe                   |
| maker-10-augustus-gene-191.16-mRNA-1 | Japonica | NA       |        | Os10g0516900 | OsR498G1019043400.01.T01 |                                                                           |
| maker-10-augustus-gene-191.18-mRNA-1 | Japonica | NA       |        |              |                          |                                                                           |
| maker-10-augustus-gene-191.20-mRNA-1 | Japonica | NA       |        | Os10g0517500 | OsR498G1019047400.01.T01 | Cys/Met metabolism PLP-dependent enzyme family protein, expressed         |
| maker-10-augustus-gene-191.6-mRNA-1  | Japonica | NA       |        | Os10g0517400 | OsR498G1019046900.01.T05 | Pyridoxal reductase, chloroplastic                                        |
| maker-10-augustus-gene-191.9-mRNA-1  | Japonica | NA       |        |              | OsR498G1019040200.01.T03 | GAMYB transcription factor                                                |
| maker-10-augustus-gene-192.39-mRNA-1 | Japonica | NA       |        | Os10g0518100 | OsR498G1019048900.01.T02 | Rab-GAP TBC domain-containing protein (Fragment)                          |
| maker-10-augustus-gene-192.42-mRNA-1 | Japonica | NA       |        | Os10g0518300 | OsR498G1019049300.01.T03 | Hop-interacting protein THI002                                            |



|                                      |          |          |                  |              |                          |                                                                            |
|--------------------------------------|----------|----------|------------------|--------------|--------------------------|----------------------------------------------------------------------------|
| maker-10-augustus-gene-192.47-mRNA-1 | Japonica | NA       | Kinase-TM        | Os10g0518800 | OsR498G1019051100.01.T01 | Protein kinase domain containing protein, expressed                        |
| maker-10-augustus-gene-192.53-mRNA-1 | Japonica | NA       |                  | Os10g0519600 | OsR498G1019053100.01.T01 | Major facilitator superfamily domain-containing protein 5                  |
| maker-10-augustus-gene-192.59-mRNA-1 | Japonica | NA       |                  |              |                          | Cytochrome b5 heme-binding domain-containing protein (Fragment)            |
| maker-10-augustus-gene-192.62-mRNA-1 | Japonica | NA       |                  | Os10g0518900 | OsR498G1019051400.01.T01 | DNA excision repair protein like                                           |
| maker-10-augustus-gene-193.0-mRNA-1  | Japonica | NA       |                  |              | OsR498G1019056900.01.T01 | Impaired sucrose induction protein, putative                               |
| maker-10-augustus-gene-193.11-mRNA-1 | Japonica | NA       |                  |              |                          | Alpha, alpha-trehalase                                                     |
| maker-10-augustus-gene-193.16-mRNA-1 | Japonica | NA       |                  | Os10g0521100 | OsR498G1019058200.01.T01 | Actin-depolymerizing factor                                                |
| maker-10-augustus-gene-193.19-mRNA-1 | Japonica | NA       |                  |              |                          | E3 ubiquitin-protein ligase XBAT33                                         |
| maker-10-augustus-gene-193.2-mRNA-1  | Japonica | NA       |                  |              | OsR498G1019058300.01.T02 | Inner membrane protein translocase involved in respiratory chain assembly  |
| maker-10-augustus-gene-193.26-mRNA-1 | Japonica | NA       | Kinase-TM        | Os10g0521700 | OsR498G1019060000.01.T01 | Non-specific serine/threonine protein kinase                               |
| maker-10-augustus-gene-193.5-mRNA-1  | Japonica | NA       |                  | Os10g0521500 | OsR498G1019058900.01.T01 | AB hydrolase-1 domain-containing protein                                   |
| maker-10-augustus-gene-193.7-mRNA-1  | Japonica | Indica   |                  | Os10g0520600 | OsR498G1019056600.01.T01 | Plant UBX domain-containing protein 10                                     |
| maker-10-augustus-gene-193.9-mRNA-1  | Japonica | NA       |                  | Os10g0520700 | OsR498G1019056800.01.T01 | Zinc finger HIT domain-containing protein 2                                |
| maker-10-augustus-gene-194.0-mRNA-1  | Japonica | NA       |                  | Os10g0521900 | OsR498G1019060300.01.T01 | RHOMBOID-like protein (Fragment)                                           |
| maker-10-augustus-gene-194.20-mRNA-1 | Japonica | NA       |                  |              |                          | 2-oxoglutarate-Fe(II) type oxidoreductase hxnY isoform B                   |
| maker-10-augustus-gene-194.34-mRNA-1 | Japonica | NA       |                  | Os10g0523100 | OsR498G1019066700.01.T02 | Fe2OG dioxygenase domain-containing protein (Fragment)                     |
| maker-10-augustus-gene-194.38-mRNA-1 | Japonica | NA       |                  |              | OsR498G1019060800.01.T01 | Methyltransferase                                                          |
| maker-10-augustus-gene-194.5-mRNA-1  | Japonica | Indica   |                  | Os10g0522400 | OsR498G1019063700.01.T01 | F-box family protein, putative, expressed                                  |
| maker-10-augustus-gene-194.8-mRNA-1  | Japonica | NA       |                  |              | OsR498G1019064100.01.T01 | Protein COFACTOR ASSEMBLY OF COMPLEX C SUBUNIT B like                      |
| maker-10-augustus-gene-195.0-mRNA-1  | Japonica | NA       |                  | Os10g0524000 | OsR498G1019068700.01.T01 |                                                                            |
| maker-10-augustus-gene-195.15-mRNA-1 | Japonica | Indica   |                  | Os10g0525000 | OsR498G1019071800.01.T01 | Cytochrome P450 family 704 subfamily A polypeptide 2                       |
| maker-10-augustus-gene-195.18-mRNA-1 | Japonica | Japonica |                  | Os10g0525000 | OsR498G1019073200.01.T01 | Cytochrome P450 family 704 subfamily A polypeptide 2                       |
| maker-10-augustus-gene-195.2-mRNA-1  | Japonica | NA       |                  | Os10g0524500 | OsR498G1019070300.01.T01 | Mandelonitrile lyase                                                       |
| maker-10-augustus-gene-195.21-mRNA-1 | Japonica | NA       |                  | Os10g0525200 | OsR498G1019073800.01.T01 | Cytochrome P450 family 704 subfamily A polypeptide 2                       |
| maker-10-augustus-gene-195.23-mRNA-1 | Japonica | NA       |                  | Os10g0525400 | OsR498G1019074000.01.T01 | Glutathione S-transferase U22                                              |
| maker-10-augustus-gene-195.25-mRNA-1 | Japonica | Indica   |                  | Os10g0525800 | OsR498G1019074400.01.T01 | Glutathione transferase31                                                  |
| maker-10-augustus-gene-195.27-mRNA-1 | Japonica | NA       |                  | Os10g0525800 | OsR498G1019075200.01.T01 | Glutathione S-transferase, N-terminal domain containing protein, expressed |
| maker-10-augustus-gene-195.4-mRNA-1  | Japonica | NA       |                  | Os10g0525600 | OsR498G1019074700.01.T01 | Glutathione S-transferase, N-terminal domain containing protein, expressed |
| maker-10-augustus-gene-195.6-mRNA-1  | Japonica | NA       |                  | Os10g0524100 | OsR498G1019069000.01.T01 | Post-GPI attachment to proteins factor 3                                   |
| maker-10-augustus-gene-195.9-mRNA-1  | Japonica | NA       |                  | Os10g0524400 | OsR498G1019070200.01.T02 | Phospholipase D                                                            |
| maker-10-augustus-gene-20.0-mRNA-1   | Japonica | Indica   |                  | Os10g0126600 | OsR498G1018082400.01.T02 | F-box domain containing protein, expressed                                 |
| maker-10-augustus-gene-20.3-mRNA-1   | Japonica | NA       |                  | Os10g0127700 | OsR498G1018082800.01.T01 | DUF639 domain-containing protein                                           |
| maker-10-augustus-gene-21.0-mRNA-1   | Japonica | Japonica |                  | Os10g0130500 | OsR498G1018089500.01.T01 |                                                                            |
| maker-10-augustus-gene-21.12-mRNA-1  | Japonica | Indica   | NBS-TM           | Os10g0130600 | OsR498G1018091000.01.T01 | Disease resistance protein RGA4                                            |
| maker-10-augustus-gene-21.3-mRNA-1   | Japonica | NA       |                  | Os05g0269800 |                          | DDE Tnp4 domain-containing protein                                         |
| maker-10-augustus-gene-22.26-mRNA-1  | Japonica | Indica   | NBS-TM PIK, PIKM | Os11g0689100 | OsR498G1018095600.01.T01 | Disease resistance protein PkIs-2                                          |
| maker-10-augustus-gene-22.27-mRNA-1  | Japonica | NA       | CC-NBS-TM        | Os10g0131901 | OsR498G1018095600.01.T01 | Disease resistance protein PkIm2-TS                                        |
| maker-10-augustus-gene-23.27-mRNA-1  | Japonica | NA       | LRR-NBS-TM       | Os10g0132500 | OsR498G1018099300.01.T02 | Putative retrotransposable elements TNP2                                   |
| maker-10-augustus-gene-23.34-mRNA-1  | Japonica | Indica   | CC-NBS-TM        | Os10g0131000 | OsR498G1018101100.01.T01 | Disease resistance protein RPM1                                            |
| maker-10-augustus-gene-23.37-mRNA-1  | Japonica | NA       |                  | Os10g0133500 | OsR498G1018102900.01.T01 | Acyl transferase 1                                                         |
| maker-10-augustus-gene-23.41-mRNA-1  | Japonica | NA       |                  |              | OsR498G1018098600.01.T01 | Beta-galactosidase                                                         |
| maker-10-augustus-gene-24.0-mRNA-1   | Japonica | NA       |                  | Os10g0134500 | OsR498G1018104900.01.T01 | F-box domain-containing protein                                            |
| maker-10-augustus-gene-24.2-mRNA-1   | Japonica | NA       |                  | Os10g0135200 | OsR498G1018106600.01.T02 | Ras-related small GTP-binding family protein                               |
| maker-10-augustus-gene-25.33-mRNA-1  | Japonica | Japonica | Kinase-TM        | Os10g0136500 | OsR498G1018109100.01.T04 | Protein kinase domain containing protein, expressed                        |
| maker-10-augustus-gene-25.38-mRNA-1  | Japonica | Japonica |                  | Os10g0136200 | OsR498G1018108800.01.T03 | F-box domain containing protein, expressed                                 |
| maker-10-augustus-gene-25.40-mRNA-1  | Japonica | NA       |                  |              |                          | F-box domain containing protein, expressed                                 |
| maker-10-augustus-gene-26.0-mRNA-1   | Japonica | NA       |                  | Os10g0138100 | OsR498G1018112500.01.T01 | Aldehyde oxidase1                                                          |
| maker-10-augustus-gene-26.6-mRNA-1   | Japonica | NA       |                  | Os10g0138000 |                          | F-box domain containing protein                                            |
| maker-10-augustus-gene-29.0-mRNA-1   | Japonica | NA       |                  |              | OsR498G1018125700.01.T01 | DUF4220 domain-containing protein (Fragment)                               |
| maker-10-augustus-gene-34.0-mRNA-1   | Japonica | NA       |                  | Os10g0149900 | OsR498G1018151500.01.T01 | Proline-rich protein, putative, expressed                                  |
| maker-10-augustus-gene-34.11-mRNA-1  | Japonica | Japonica | Kinase-TM        | Os10g0151100 | OsR498G1018157400.01.T01 | Wall-associated receptor kinase 2                                          |
| maker-10-augustus-gene-34.14-mRNA-1  | Japonica | NA       |                  | Os10g0150300 | OsR498G1018152000.01.T01 | Proline-rich protein (Fragment)                                            |
| maker-10-augustus-gene-34.16-mRNA-1  | Japonica | Japonica |                  | Os10g0150400 | OsR498G1018152200.01.T01 | Proline-rich protein (Fragment)                                            |
| maker-10-augustus-gene-34.5-mRNA-1   | Japonica | Japonica |                  | Os10g0150600 | OsR498G1018152300.01.T01 | Proline-rich protein 4                                                     |
| maker-10-augustus-gene-34.7-mRNA-1   | Japonica | NA       |                  | Os10g0150700 | OsR498G1018152700.01.T01 | Proline-rich protein 4                                                     |
| maker-10-augustus-gene-34.9-mRNA-1   | Japonica | Japonica |                  | Os10g0150800 | OsR498G1018152900.01.T01 | Proline-rich protein 4                                                     |
| maker-10-augustus-gene-35.0-mRNA-1   | Japonica | NA       | Kinase-TM        |              |                          | Wall-associated receptor kinase 4                                          |
| maker-10-augustus-gene-37.30-mRNA-1  | Japonica | NA       |                  |              | OsR498G1018165700.01.T03 | Nuclear pore complex protein Nup188a                                       |
| maker-10-augustus-gene-37.35-mRNA-1  | Japonica | NA       |                  |              | OsR498G1018166100.01.T01 | Nucleoporin NUP188                                                         |
| maker-10-augustus-gene-39.27-mRNA-1  | Japonica | NA       |                  |              | OsR498G1018182100.01.T01 | TF-B3 domain-containing protein                                            |
| maker-10-augustus-gene-43.34-mRNA-1  | Japonica | NA       |                  |              |                          | Amino-acid permease BAT1                                                   |

|                                     |          |          |           |              |                          |                                                                         |
|-------------------------------------|----------|----------|-----------|--------------|--------------------------|-------------------------------------------------------------------------|
| maker-10-augustus-gene-43.37-mRNA-1 | Japonica | NA       |           |              | OsR498G1018204200.01.T02 | NPH3 domain-containing protein                                          |
| maker-10-augustus-gene-43.39-mRNA-1 | Japonica | Indica   | Kinase-TM | Os10g0174800 | OsR498G1018204400.01.T01 | Wall associated kinase                                                  |
| maker-10-augustus-gene-43.42-mRNA-1 | Japonica | NA       | Kinase-TM |              | OsR498G1018205800.01.T01 | Wall associated kinase                                                  |
| maker-10-augustus-gene-44.23-mRNA-1 | Japonica | Indica   |           | Os01g0946300 | OsR498G1018221300.01.T01 | Lecithin-cholesterol acyltransferase-like 1                             |
| maker-10-augustus-gene-45.0-mRNA-1  | Japonica | NA       |           | Os10g0158400 | OsR498G1018222500.01.T01 | Putative chalcone synthase                                              |
| maker-10-augustus-gene-45.2-mRNA-1  | Japonica | Indica   |           | Os10g0158400 | OsR498G1018222000.01.T01 | Putative chalcone synthase                                              |
| maker-10-augustus-gene-45.4-mRNA-1  | Japonica | NA       |           |              |                          | Autophagy-related protein 9                                             |
| maker-10-augustus-gene-45.6-mRNA-1  | Japonica | NA       |           |              | OsR498G1018226400.01.T01 |                                                                         |
| maker-10-augustus-gene-46.31-mRNA-1 | Japonica | NA       |           | Os08g0459400 | OsR498G0305568900.01.T01 | DDE Tnp4 domain-containing protein                                      |
| maker-10-augustus-gene-48.33-mRNA-1 | Japonica | NA       |           |              |                          |                                                                         |
| maker-10-augustus-gene-58.47-mRNA-1 | Japonica | Japonica |           | Os10g0181200 | OsR498G1018281600.01.T07 | Pentatricopeptide repeat                                                |
| maker-10-augustus-gene-59.35-mRNA-1 | Japonica | NA       |           | Os10g0183900 | OsR498G1018292300.01.T01 | rRNA adenine N(6)-methyltransferase                                     |
| maker-10-augustus-gene-59.37-mRNA-1 | Japonica | NA       | NBS-TM    | Os10g0183000 | OsR498G1018288800.01.T04 | NB-ARC domain containing protein, expressed                             |
| maker-10-augustus-gene-60.0-mRNA-1  | Japonica | Indica   |           | Os03g0251500 | OsR498G1018295100.01.T01 | V-type proton ATPase subunit a                                          |
| maker-10-augustus-gene-62.0-mRNA-1  | Japonica | NA       |           |              |                          | PAP-associated domain-containing protein                                |
| maker-10-augustus-gene-62.5-mRNA-1  | Japonica | NA       |           |              | OsR498G1018311100.01.T01 | RAB6-interacting golgin                                                 |
| maker-10-augustus-gene-63.0-mRNA-1  | Japonica | NA       |           |              | OsR498G1018313100.01.T01 | Oxidoreductase/ zinc ion binding protein                                |
| maker-10-augustus-gene-63.22-mRNA-1 | Japonica | NA       |           | Os10g0189100 | OsR498G1018314600.01.T01 | Phosphoglucosyltransferase (alpha-D-glucose-1,6-bisphosphate-dependent) |
| maker-10-augustus-gene-64.14-mRNA-1 | Japonica | NA       |           | Os08g0271600 |                          |                                                                         |
| maker-10-augustus-gene-64.20-mRNA-1 | Japonica | NA       |           |              | OsR498G1018323800.01.T01 | Putative proline-rich cell wall protein                                 |
| maker-10-augustus-gene-64.3-mRNA-1  | Japonica | NA       |           |              | OsR498G1018322500.01.T06 | Nitroreductase                                                          |
| maker-10-augustus-gene-64.6-mRNA-1  | Japonica | Japonica |           | Os10g0190900 | OsR498G0408361700.01.T01 | Protein DETOXIFICATION                                                  |
| maker-10-augustus-gene-64.9-mRNA-1  | Japonica | NA       |           | Os10g0189600 | OsR498G1018317800.01.T02 | Long chain base biosynthesis protein 1                                  |
| maker-10-augustus-gene-66.0-mRNA-1  | Japonica | Japonica |           | Os10g0193100 | OsR498G1018327500.01.T01 | AAI domain-containing protein                                           |
| maker-10-augustus-gene-66.2-mRNA-1  | Japonica | NA       |           | Os10g0193500 | OsR498G1018329300.01.T01 | AAI domain-containing protein                                           |
| maker-10-augustus-gene-72.39-mRNA-1 | Japonica | Indica   |           | Os10g0196100 | OsR498G1018339300.01.T01 | Coumaroyl shikimate 3-hydroxylase 2                                     |
| maker-10-augustus-gene-72.41-mRNA-1 | Japonica | NA       |           |              | OsR498G1018339700.01.T04 |                                                                         |
| maker-10-augustus-gene-73.33-mRNA-1 | Japonica | NA       |           | Os10g0198600 | OsR498G1018343700.01.T03 | IENR2 domain-containing protein (Fragment)                              |
| maker-10-augustus-gene-73.45-mRNA-1 | Japonica | NA       |           | Os10g0322250 |                          | HAT family dimerisation domain containing protein, expressed            |
| maker-10-augustus-gene-73.49-mRNA-1 | Japonica | NA       |           | Os10g0198100 | OsR498G1018341600.01.T01 |                                                                         |
| maker-10-augustus-gene-73.51-mRNA-1 | Japonica | NA       |           |              |                          | Mevalonate kinase                                                       |
| maker-10-augustus-gene-74.0-mRNA-1  | Japonica | NA       |           |              |                          |                                                                         |
| maker-10-augustus-gene-74.5-mRNA-1  | Japonica | Indica   |           | Os10g0199500 | OsR498G1018348300.01.T03 |                                                                         |
| maker-10-augustus-gene-75.0-mRNA-1  | Japonica | NA       | Kinase    |              | OsR498G1018352600.01.T02 | Putative receptor-like protein kinase                                   |
| maker-10-augustus-gene-75.3-mRNA-1  | Japonica | NA       |           | Os03g0129000 | OsR498G1018354600.01.T02 | Phosphatidylinositol-glycan biosynthesis class F                        |
| maker-10-augustus-gene-77.25-mRNA-1 | Japonica | Japonica |           | Os10g0202900 | OsR498G1018362000.01.T01 |                                                                         |
| maker-10-augustus-gene-77.27-mRNA-1 | Japonica | NA       |           | Os10g0203000 | OsR498G1018362600.01.T01 | Calcium-binding endonuclease/exonuclease/phosphatase family             |
| maker-10-augustus-gene-78.5-mRNA-1  | Japonica | NA       |           | Os10g0204100 | OsR498G1018368400.01.T01 | probable E3 ubiquitin-protein ligase LOG2                               |
| maker-10-augustus-gene-79.33-mRNA-1 | Japonica | NA       |           |              | OsR498G0100876000.01.T01 | Transposon protein, putative, Mutator sub-class                         |
| maker-10-augustus-gene-84.0-mRNA-1  | Japonica | NA       |           | Os10g0209700 | OsR498G1018391500.01.T01 | Heavy metal-associated isoprenylated plant protein 8                    |
| maker-11-augustus-gene-0.17-mRNA-1  | Japonica | Japonica |           | Os11g0116900 | OsR498G1119325200.01.T01 | WRKY DNA binding domain containing protein, expressed                   |
| maker-11-augustus-gene-1.39-mRNA-1  | Japonica | NA       |           | Os12g0117100 | OsR498G1119329500.01.T03 | Methylesterase 17                                                       |
| maker-11-augustus-gene-1.43-mRNA-1  | Japonica | NA       |           |              |                          | Methylesterase 17                                                       |
| maker-11-augustus-gene-1.47-mRNA-1  | Japonica | NA       |           | Os11g0119100 | OsR498G1119332100.01.T03 | bifunctional epoxide hydrolase 2 isoform X1                             |
| maker-11-augustus-gene-1.51-mRNA-1  | Japonica | Indica   |           | Os12g0118900 | OsR498G1119332500.01.T01 | Secologanin synthase                                                    |
| maker-11-augustus-gene-1.55-mRNA-1  | Japonica | NA       |           | Os11g0117400 | OsR498G1119327000.01.T01 | WRKY DNA binding domain containing protein, expressed                   |
| maker-11-augustus-gene-1.57-mRNA-1  | Japonica | NA       |           | Os11g0117500 | OsR498G1119327400.01.T01 | WRKY transcription factor 64                                            |
| maker-11-augustus-gene-1.60-mRNA-1  | Japonica | NA       |           | Os11g0117600 | OsR498G1119327800.01.T01 | WRKY DNA binding domain containing protein, expressed                   |
| maker-11-augustus-gene-1.62-mRNA-1  | Japonica | NA       |           | Os11g0117700 | OsR498G1119328600.01.T01 |                                                                         |
| maker-11-augustus-gene-1.64-mRNA-1  | Japonica | Indica   |           | Os12g0117250 | OsR498G1119330000.01.T01 | Mannan endo-1,4-beta-mannosidase                                        |
| maker-11-augustus-gene-1.67-mRNA-1  | Japonica | NA       |           | Os11g0118300 | OsR498G1119330200.01.T02 | Root phototropism protein 2                                             |
| maker-11-augustus-gene-1.70-mRNA-1  | Japonica | NA       |           | Os12g0117600 | OsR498G1119330600.01.T01 | BTB/POZ domain-containing protein At3g08570                             |
| maker-11-augustus-gene-1.72-mRNA-1  | Japonica | NA       |           | Os12g0117800 | OsR498G1119331000.01.T02 | NAM-associated domain-containing protein                                |
| maker-11-augustus-gene-1.73-mRNA-1  | Japonica | NA       |           | Os11g0118800 | OsR498G1119331600.01.T01 | Mannan endo-1,4-beta-mannosidase                                        |
| maker-11-augustus-gene-1.79-mRNA-1  | Japonica | NA       |           |              | OsR498G1120154400.01.T01 | Endonuclease                                                            |
| maker-11-augustus-gene-10.0-mRNA-1  | Japonica | NA       |           | Os12g0518200 | OsR498G1220892100.01.T01 |                                                                         |
| maker-11-augustus-gene-10.15-mRNA-1 | Japonica | NA       |           |              | OsR498G1119384700.01.T01 | Transcription initiation factor IIE subunit alpha                       |
| maker-11-augustus-gene-10.18-mRNA-1 | Japonica | NA       |           |              | OsR498G1119384900.01.T03 | Transcription initiation factor IIE subunit alpha                       |
| maker-11-augustus-gene-10.23-mRNA-1 | Japonica | NA       |           |              |                          | Transporter, putative, expressed                                        |
| maker-11-augustus-gene-10.3-mRNA-1  | Japonica | NA       |           | Os11g0136500 | OsR498G1119382100.01.T03 | ACPS domain-containing protein (Fragment)                               |
| maker-11-augustus-gene-10.40-mRNA-1 | Japonica | NA       |           | Os11g0136400 | OsR498G1119382000.01.T03 | MFS domain-containing protein (Fragment)                                |

|                                      |          |          |           |              |                          |                                                                   |
|--------------------------------------|----------|----------|-----------|--------------|--------------------------|-------------------------------------------------------------------|
| maker-11-augustus-gene-10.49-mRNA-1  | Japonica | NA       |           | Os11g0136701 | OsR498G1119382600.01.T02 | Guanine nucleotide-binding protein G(T) subunit alpha-3 like      |
| maker-11-augustus-gene-10.53-mRNA-1  | Japonica | NA       |           | Os11g0136800 | OsR498G1119382800.01.T02 | Protein-tyrosine-phosphatase                                      |
| maker-11-augustus-gene-10.58-mRNA-1  | Japonica | NA       |           | Os11g0137000 | OsR498G1119383800.01.T01 | Auxin efflux carrier component                                    |
| maker-11-augustus-gene-10.6-mRNA-1   | Japonica | NA       | Kinase-TM | Os11g0136600 | OsR498G1119382300.01.T01 | Calcium-dependent protein kinase                                  |
| maker-11-augustus-gene-10.60-mRNA-1  | Japonica | NA       |           | Os12g0133900 | OsR498G1119384000.01.T01 | U3 small nucleolar ribonucleoprotein protein MPP10                |
| maker-11-augustus-gene-10.65-mRNA-1  | Japonica | Indica   |           | Os11g0137300 | OsR498G1119384600.01.T01 | Proteasome stabiliser ECM29                                       |
| maker-11-augustus-gene-10.9-mRNA-1   | Japonica | Indica   |           | Os12g0134000 | OsR498G1119384300.01.T04 | Pyruvate carboxyltransferase domain-containing protein (Fragment) |
| maker-11-augustus-gene-101.37-mRNA-1 | Japonica | NA       |           | Os02g0530900 | OsR498G0203991600.01.T01 |                                                                   |
| maker-11-augustus-gene-101.39-mRNA-1 | Japonica | NA       |           | Os11g0416900 | OsR498G1119927600.01.T02 | White-brown complex like protein 30                               |
| maker-11-augustus-gene-102.0-mRNA-1  | Japonica | NA       |           | Os11g0417400 | OsR498G1119930100.01.T01 | Pyruvate dehydrogenase phosphatase                                |
| maker-11-augustus-gene-105.33-mRNA-1 | Japonica | NA       |           | Os11g0421800 | OsR498G1119966200.01.T01 |                                                                   |
| maker-11-augustus-gene-106.0-mRNA-1  | Japonica | Indica   |           | Os11g0423800 | OsR498G1119975500.01.T07 | Mitochondrial arginine transporter like                           |
| maker-11-augustus-gene-107.0-mRNA-1  | Japonica | NA       |           | Os11g0424400 | OsR498G1119977800.01.T01 | Myosin family protein, putative, expressed                        |
| maker-11-augustus-gene-108.35-mRNA-1 | Japonica | Japonica |           | Os11g0425100 | OsR498G1119982900.01.T01 | Fruit bromelain                                                   |
| maker-11-augustus-gene-108.38-mRNA-1 | Japonica | NA       |           | Os11g0425300 | OsR498G1119984600.01.T03 | Protein PEP-RELATED DEVELOPMENT ARRESTED 1 homolog, chloroplastic |
| maker-11-augustus-gene-109.0-mRNA-1  | Japonica | NA       |           | Os11g0425800 | OsR498G1119987500.01.T02 | Ribosomal protein L13a                                            |
| maker-11-augustus-gene-109.2-mRNA-1  | Japonica | Indica   |           | Os11g0426400 | OsR498G1119990700.01.T01 | Phytoecyanin domain-containing protein (Fragment)                 |
| maker-11-augustus-gene-11.49-mRNA-1  | Japonica | NA       |           | Os12g0136200 | OsR498G1119392100.01.T01 | Heterogeneous nuclear ribonucleoprotein Q                         |
| maker-11-augustus-gene-11.55-mRNA-1  | Japonica | NA       |           | Os12g0136900 | OsR498G1119394100.01.T05 | Calcium-transporting ATPase                                       |
| maker-11-augustus-gene-11.61-mRNA-1  | Japonica | NA       |           |              |                          | Phosphoglycerate mutase family protein, expressed                 |
| maker-11-augustus-gene-11.66-mRNA-1  | Japonica | NA       |           | Os11g0138600 | OsR498G1119390600.01.T03 | Phosphoglycerate mutase gpmB                                      |
| maker-11-augustus-gene-11.71-mRNA-1  | Japonica | NA       |           | Os11g0139100 | OsR498G1119391800.01.T01 | KOW domain-containing protein                                     |
| maker-11-augustus-gene-11.76-mRNA-1  | Japonica | NA       |           | Os11g0139850 | OsR498G1119393400.01.T04 | Gamma-glutamylcyclotransferase family protein (Fragment)          |
| maker-11-augustus-gene-11.79-mRNA-1  | Japonica | NA       |           | Os11g0140100 | OsR498G1119393800.01.T04 | Mitochondrial acidic protein MAM33                                |
| maker-11-augustus-gene-110.0-mRNA-1  | Japonica | NA       |           | Os08g0230450 |                          |                                                                   |
| maker-11-augustus-gene-111.32-mRNA-1 | Japonica | NA       |           | Os11g0428800 | OsR498G1120003500.01.T01 | Phytoecyanin domain-containing protein (Fragment)                 |
| maker-11-augustus-gene-111.33-mRNA-1 | Japonica | Indica   |           | Os08g0560300 | OsR498G1120003100.01.T01 | PLATZ transcription factor family protein                         |
| maker-11-augustus-gene-111.40-mRNA-1 | Japonica | Indica   |           | Os11g0429600 | OsR498G1120007200.01.T01 | Serine carboxypeptidase-like 19                                   |
| maker-11-augustus-gene-111.43-mRNA-1 | Japonica | NA       |           | Os11g0430000 | OsR498G1120008800.01.T02 | Serine carboxypeptidase-like 19                                   |
| maker-11-augustus-gene-112.25-mRNA-1 | Japonica | NA       |           | Os08g0230450 |                          |                                                                   |
| maker-11-augustus-gene-112.27-mRNA-1 | Japonica | Indica   |           | Os11g0432900 | OsR498G1120010000.01.T02 | Serine carboxypeptidase-like 19                                   |
| maker-11-augustus-gene-112.30-mRNA-1 | Japonica | NA       |           | Os11g0431400 |                          | Serine carboxypeptidase-like 11                                   |
| maker-11-augustus-gene-112.31-mRNA-1 | Japonica | NA       |           |              | OsR498G1120010600.01.T04 | Serine carboxypeptidase-like 19                                   |
| maker-11-augustus-gene-113.3-mRNA-1  | Japonica | NA       |           | Os11g0432600 | OsR498G1120015100.01.T01 | Very-long-chain 3-oxoacyl-CoA reductase 1                         |
| maker-11-augustus-gene-113.5-mRNA-1  | Japonica | Indica   |           | Os11g0432900 | OsR498G1120011800.01.T03 | Serine carboxypeptidase-like 19                                   |
| maker-11-augustus-gene-113.7-mRNA-1  | Japonica | NA       |           | Os11g0432800 | OsR498G1120015800.01.T02 | Protein RETICULATA, chloroplastic                                 |
| maker-11-augustus-gene-113.8-mRNA-1  | Japonica | NA       |           |              |                          | Serine carboxypeptidase-like 11                                   |
| maker-11-augustus-gene-114.31-mRNA-1 | Japonica | Indica   |           | Os11g0433200 | OsR498G1120016900.01.T02 | Signal peptide peptidase family protein, expressed isoform 1      |
| maker-11-augustus-gene-114.35-mRNA-1 | Japonica | NA       |           |              | OsR498G1120018300.01.T03 | Protein transport protein SEC23                                   |
| maker-11-augustus-gene-114.42-mRNA-1 | Japonica | Indica   |           | Os07g0546700 | OsR498G1120018900.01.T01 | 60S ribosomal protein L38                                         |
| maker-11-augustus-gene-114.46-mRNA-1 | Japonica | NA       |           | Os11g0434000 | OsR498G1120019200.01.T01 | Magnesium-dependent phosphatase 1                                 |
| maker-11-augustus-gene-115.34-mRNA-1 | Japonica | NA       |           |              | OsR498G1120020200.01.T01 | SWI/SNF complex subunit SWI3C-like                                |
| maker-11-augustus-gene-115.36-mRNA-1 | Japonica | NA       |           | Os11g0435500 |                          | Galactinol-sucrose galactosyltransferase                          |
| maker-11-augustus-gene-116.34-mRNA-1 | Japonica | NA       |           |              | OsR498G1120025500.01.T01 | probable 2-oxoglutarate-dependent dioxygenase At3g111800          |
| maker-11-augustus-gene-117.0-mRNA-1  | Japonica | Indica   |           | Os11g0438700 | OsR498G1120043200.01.T01 | Noroxomaritidine/norcrangosidine reductase                        |
| maker-11-augustus-gene-117.3-mRNA-1  | Japonica | NA       |           | Os11g0438700 | OsR498G1120041800.01.T03 | Tropinone reductase I                                             |
| maker-11-augustus-gene-117.8-mRNA-1  | Japonica | NA       |           | Os11g0439100 | OsR498G1120039600.01.T01 | Tropinone reductase like                                          |
| maker-11-augustus-gene-118.28-mRNA-1 | Japonica | NA       |           |              | OsR498G0100876000.01.T01 | Transposon protein, putative, Mutator sub-class, expressed        |
| maker-11-augustus-gene-118.30-mRNA-1 | Japonica | NA       |           | Os11g0440200 | OsR498G1120037500.01.T01 | GDA1/CD39 family protein, expressed                               |
| maker-11-augustus-gene-118.36-mRNA-1 | Japonica | NA       |           | Os11g0440200 | OsR498G1120037500.01.T01 | GDA1/CD39 family protein, expressed                               |
| maker-11-augustus-gene-119.31-mRNA-1 | Japonica | NA       |           | Os11g0441500 | OsR498G1120030500.01.T01 | Glycosyltransferase                                               |
| maker-11-augustus-gene-119.33-mRNA-1 | Japonica | NA       |           | Os04g0691000 |                          | F-box domain-containing protein                                   |
| maker-11-augustus-gene-119.34-mRNA-1 | Japonica | NA       |           | Os11g0442650 | OsR498G1120026900.01.T01 | BHLH transcription factor                                         |
| maker-11-augustus-gene-12.41-mRNA-1  | Japonica | NA       |           |              | OsR498G1119395500.01.T08 | Kallikrein-2 like                                                 |
| maker-11-augustus-gene-12.50-mRNA-1  | Japonica | NA       |           | Os11g0140900 | OsR498G1119395900.01.T01 |                                                                   |
| maker-11-augustus-gene-12.52-mRNA-1  | Japonica | NA       |           | Os12g0137500 | OsR498G1220904300.01.T01 | PP2A regulatory subunit like                                      |
| maker-11-augustus-gene-12.61-mRNA-1  | Japonica | NA       |           | Os01g0861400 | OsR498G0100480900.01.T01 | Vacuolar-sorting receptor 1                                       |
| maker-11-augustus-gene-12.63-mRNA-1  | Japonica | NA       |           | Os11g0141900 | OsR498G1119400100.01.T02 | BTB/POZ domain and ankyrin repeat-containing protein NH5.1        |
| maker-11-augustus-gene-12.66-mRNA-1  | Japonica | NA       |           | Os11g0140600 | OsR498G1119394800.01.T02 | probable calcium-binding protein CML49                            |
| maker-11-augustus-gene-120.32-mRNA-1 | Japonica | NA       |           | Os11g0442900 |                          |                                                                   |
| maker-11-augustus-gene-120.33-mRNA-1 | Japonica | NA       |           | Os11g0443700 | OsR498G1120046000.01.T01 | Tropinone reductase I                                             |

|                                      |          |          |           |              |                          |                                                                           |
|--------------------------------------|----------|----------|-----------|--------------|--------------------------|---------------------------------------------------------------------------|
| maker-11-augustus-gene-120.35-mRNA-1 | Japonica | NA       |           | Os11g0444000 | OsR498G1120044700.01.T01 | DIMBOA UDP-glucosyltransferase BX8                                        |
| maker-11-augustus-gene-121.22-mRNA-1 | Japonica | NA       |           | Os11g0444700 | OsR498G1120048900.01.T01 | PB1 domain-containing protein (Fragment)                                  |
| maker-11-augustus-gene-121.24-mRNA-1 | Japonica | Indica   |           | Os11g0444700 | OsR498G1120049700.01.T01 | PB1 domain-containing protein (Fragment)                                  |
| maker-11-augustus-gene-121.26-mRNA-1 | Japonica | Indica   |           | Os11g0446000 | OsR498G1120054300.01.T01 | Serine/threonine-protein kinase WNK (With No Lysine)-related              |
| maker-11-augustus-gene-123.36-mRNA-1 | Japonica | NA       |           |              |                          | Short integuments 2 mitochondrial                                         |
| maker-11-augustus-gene-123.43-mRNA-1 | Japonica | NA       | Kinase-TM |              | OsR498G1120059900.01.T01 | probable serine/threonine-protein kinase PBL28                            |
| maker-11-augustus-gene-123.45-mRNA-1 | Japonica | NA       |           | Os11g0448400 | OsR498G1120060300.01.T02 | RNA polymerase sigma factor                                               |
| maker-11-augustus-gene-123.48-mRNA-1 | Japonica | NA       | Kinase-TM |              |                          | Putative serine/threonine-protein kinase WNK9 (Fragment)                  |
| maker-11-augustus-gene-126.0-mRNA-1  | Japonica | NA       |           | Os11g0451700 | OsR498G1120068200.01.T02 | Dehydrin                                                                  |
| maker-11-augustus-gene-127.29-mRNA-1 | Japonica | NA       |           |              |                          |                                                                           |
| maker-11-augustus-gene-127.31-mRNA-1 | Japonica | NA       |           | Os11g0453900 | OsR498G1120073200.01.T01 | Dehydrin family protein, expressed                                        |
| maker-11-augustus-gene-127.33-mRNA-1 | Japonica | NA       |           | Os11g0454000 | OsR498G1120074000.01.T01 | Dehydrin                                                                  |
| maker-11-augustus-gene-127.35-mRNA-1 | Japonica | NA       |           | Os11g0454200 | OsR498G1120074800.01.T01 | Dehydrin family protein, expressed                                        |
| maker-11-augustus-gene-127.37-mRNA-1 | Japonica | Japonica |           | Os11g0454300 | OsR498G1120075200.01.T01 | Deyhydrin 4                                                               |
| maker-11-augustus-gene-128.30-mRNA-1 | Japonica | NA       |           | Os11g0455800 | OsR498G1120081300.01.T01 | Serine hydroxymethyltransferase                                           |
| maker-11-augustus-gene-128.33-mRNA-1 | Japonica | NA       |           | Os11g0456300 | OsR498G1120082900.01.T01 |                                                                           |
| maker-11-augustus-gene-128.36-mRNA-1 | Japonica | NA       |           |              | OsR498G1120078800.01.T01 | Protein MICRORCHIDIA 6                                                    |
| maker-11-augustus-gene-128.38-mRNA-1 | Japonica | NA       |           | Os11g0455500 | OsR498G1120079200.01.T01 | Adenosylhomocysteinase                                                    |
| maker-11-augustus-gene-128.40-mRNA-1 | Japonica | NA       |           | Os11g0456100 | OsR498G1120082200.01.T01 | UV-B-induced protein, chloroplastic-like protein                          |
| maker-11-augustus-gene-128.43-mRNA-1 | Japonica | NA       |           | Os11g0456200 | OsR498G1120082600.01.T01 |                                                                           |
| maker-11-augustus-gene-128.45-mRNA-1 | Japonica | Japonica |           | Os11g0457000 | OsR498G1120085200.01.T01 | Transposon protein, putative, Mariner sub-class, expressed                |
| maker-11-augustus-gene-129.0-mRNA-1  | Japonica | NA       |           |              | OsR498G1120089900.01.T01 | DUF629 domain-containing protein                                          |
| maker-11-augustus-gene-13.0-mRNA-1   | Japonica | NA       |           |              | OsR498G1119401900.01.T02 | Strictosidine synthase 3                                                  |
| maker-11-augustus-gene-13.13-mRNA-1  | Japonica | NA       |           | Os11g0143200 | OsR498G1119403200.01.T02 | CPD brassinosteroid C-23 hydroxylase                                      |
| maker-11-augustus-gene-13.16-mRNA-1  | Japonica | NA       |           |              |                          | RNA polymerase Rpb5, N-terminal domain containing protein, expressed      |
| maker-11-augustus-gene-13.19-mRNA-1  | Japonica | NA       |           | Os11g0143500 | OsR498G1119403800.01.T01 | L-galactono-1,4-lactone dehydrogenase, mitochondrial                      |
| maker-11-augustus-gene-13.24-mRNA-1  | Japonica | NA       |           |              |                          | FBD domain-containing protein (Fragment)                                  |
| maker-11-augustus-gene-13.3-mRNA-1   | Japonica | NA       |           | Os12g0138900 | OsR498G1220909100.01.T02 | 2-isopropylmalate synthase 1 chloroplastic                                |
| maker-11-augustus-gene-13.9-mRNA-1   | Japonica | NA       |           | Os11g0143300 | OsR498G1220910900.01.T01 | Two-component response regulator ORR10                                    |
| maker-11-augustus-gene-130.29-mRNA-1 | Japonica | NA       |           | Os11g0461000 |                          | Serine carboxypeptidase-like                                              |
| maker-11-augustus-gene-130.32-mRNA-1 | Japonica | Indica   |           | Os11g0460800 | OsR498G1120091900.01.T04 | Serine carboxypeptidase-like protein (Fragment)                           |
| maker-11-augustus-gene-131.2-mRNA-1  | Japonica | NA       |           | Os11g0461000 |                          | Serine carboxypeptidase-like 7                                            |
| maker-11-augustus-gene-131.6-mRNA-1  | Japonica | NA       |           |              |                          | Serine carboxypeptidase-like 6                                            |
| maker-11-augustus-gene-131.7-mRNA-1  | Japonica | Indica   |           | Os11g0460800 | OsR498G1120091900.01.T04 | Serine carboxypeptidase 1                                                 |
| maker-11-augustus-gene-132.28-mRNA-1 | Japonica | NA       | NBS-TM    |              |                          | F-box protein FBX14                                                       |
| maker-11-augustus-gene-132.30-mRNA-1 | Japonica | Indica   |           | Os11g0463600 | OsR498G1120101100.01.T02 | FHA domain containing protein, expressed                                  |
| maker-11-augustus-gene-132.33-mRNA-1 | Japonica | NA       |           |              | OsR498G1120099600.01.T01 |                                                                           |
| maker-11-augustus-gene-132.35-mRNA-1 | Japonica | NA       |           | Os11g0463700 | OsR498G1120101600.01.T03 | CRP7-Cysteine-rich family protein expressed                               |
| maker-11-augustus-gene-133.28-mRNA-1 | Japonica | Indica   |           | Os08g0381000 | OsR498G1119949600.01.T01 | Cell wall protein-like                                                    |
| maker-11-augustus-gene-134.3-mRNA-1  | Japonica | NA       |           |              | OsR498G1120106600.01.T03 | Putative Pyridoxal phosphate (PLP)-dependent transferases superfamily pro |
| maker-11-augustus-gene-135.25-mRNA-1 | Japonica | NA       |           |              | OsR498G0100828800.01.T01 | Hydroxyproline-rich glycoprotein-like                                     |
| maker-11-augustus-gene-135.29-mRNA-1 | Japonica | Indica   |           | Os11g0469900 | OsR498G1120113400.01.T01 | Indole-2-monooxygenase                                                    |
| maker-11-augustus-gene-135.30-mRNA-1 | Japonica | Indica   |           | Os11g0465200 | OsR498G1120113400.01.T01 | Indole-2-monooxygenase                                                    |
| maker-11-augustus-gene-135.35-mRNA-1 | Japonica | Indica   | Kinase-TM | Os11g0470200 | OsR498G1120115000.01.T01 | Protein kinase domain containing protein, expressed                       |
| maker-11-augustus-gene-136.24-mRNA-1 | Japonica | NA       |           | Os11g0471200 |                          |                                                                           |
| maker-11-augustus-gene-136.26-mRNA-1 | Japonica | NA       |           | Os11g0472000 | OsR498G1120119800.01.T02 | Zinc finger CCCH domain-containing protein 63                             |
| maker-11-augustus-gene-137.33-mRNA-1 | Japonica | Indica   |           | Os11g0472500 | OsR498G1120121900.01.T06 | Probable magnesium transporter                                            |
| maker-11-augustus-gene-137.38-mRNA-1 | Japonica | NA       |           |              | OsR498G1120122500.01.T01 | ROP-INTERACTIVE CRIB MOTIF-CONTAINING protein 2                           |
| maker-11-augustus-gene-137.43-mRNA-1 | Japonica | NA       |           |              | OsR498G1120126500.01.T01 | Ubiquitinyl hydrolase 1                                                   |
| maker-11-augustus-gene-137.50-mRNA-1 | Japonica | NA       |           | Os11g0473100 | OsR498G1120126200.01.T01 | CDK-activating kinase assembly factor MAT1                                |
| maker-11-augustus-gene-138.2-mRNA-1  | Japonica | Japonica |           | Os11g0474800 | OsR498G0204151800.01.T05 | Ent-isokaurene synthase                                                   |
| maker-11-augustus-gene-14.50-mRNA-1  | Japonica | NA       |           | Os11g0146500 | OsR498G1119406700.01.T01 | Set1/Ash2 histone methyltransferase complex subunit ASH2                  |
| maker-11-augustus-gene-14.60-mRNA-1  | Japonica | NA       |           |              |                          | NAC domain-containing protein                                             |
| maker-11-augustus-gene-14.62-mRNA-1  | Japonica | NA       |           | Os11g0147100 | OsR498G1119408900.01.T01 | R3H-associated N-terminal domain-containing protein                       |
| maker-11-augustus-gene-14.66-mRNA-1  | Japonica | NA       |           | Os11g0147500 | OsR498G1119411100.01.T02 | HMA domain-containing protein (Fragment)                                  |
| maker-11-augustus-gene-14.68-mRNA-1  | Japonica | NA       |           | Os12g0141100 | OsR498G1119406000.01.T01 | Phosphatidylinositol 4-phosphate 5-kinase                                 |
| maker-11-augustus-gene-14.74-mRNA-1  | Japonica | NA       |           | Os11g0146700 | OsR498G1119407400.01.T02 | Suppressor of mec-8 and unc-52 protein 2                                  |
| maker-11-augustus-gene-14.81-mRNA-1  | Japonica | Indica   |           | Os11g0146800 | OsR498G1119407800.01.T03 | DNA meiotic recombinase 1                                                 |
| maker-11-augustus-gene-14.86-mRNA-1  | Japonica | NA       |           | Os11g0147000 | OsR498G1119408600.01.T02 | AMP-binding enzyme family protein, expressed                              |
| maker-11-augustus-gene-14.96-mRNA-1  | Japonica | NA       |           |              | OsR498G1119410000.01.T03 |                                                                           |
| maker-11-augustus-gene-142.31-mRNA-1 | Japonica | NA       |           |              |                          |                                                                           |

|                                      |          |          |           |              |                          |                                                                           |
|--------------------------------------|----------|----------|-----------|--------------|--------------------------|---------------------------------------------------------------------------|
| maker-11-augustus-gene-142.34-mRNA-1 | Japonica | NA       |           | Os11g0479000 | OsR498G1120142300.01.T01 | Acetylglucosaminyltransferase family protein                              |
| maker-11-augustus-gene-142.36-mRNA-1 | Japonica | Indica   |           | Os11g0479232 | OsR498G1120143900.01.T01 | GPI transamidase component PIG-T                                          |
| maker-11-augustus-gene-142.39-mRNA-1 | Japonica | NA       |           |              |                          | Rab-GAP TBC domain-containing protein                                     |
| maker-11-augustus-gene-142.46-mRNA-1 | Japonica | NA       | CC-NBS-TM | Os11g0479100 | OsR498G1120143800.01.T02 | NB-ARC domain, putative                                                   |
| maker-11-augustus-gene-144.30-mRNA-1 | Japonica | NA       |           | Os11g0482100 | OsR498G1120147500.01.T01 | Retrotransposon protein, putative, unclassified, expressed                |
| maker-11-augustus-gene-144.36-mRNA-1 | Japonica | NA       |           | Os11g0482000 | OsR498G1120146800.01.T01 | 40S ribosomal protein S5 isoform A                                        |
| maker-11-augustus-gene-144.38-mRNA-1 | Japonica | Indica   |           | Os11g0482200 | OsR498G1120147800.01.T01 | AvrRpt-cleavage domain-containing protein                                 |
| maker-11-augustus-gene-144.41-mRNA-1 | Japonica | Indica   |           | Os11g0482500 | OsR498G1120148800.01.T01 | PHD domain-containing protein                                             |
| maker-11-augustus-gene-145.0-mRNA-1  | Japonica | NA       |           | Os11g0483600 | OsR498G1120151100.01.T04 | DET1- and DDB1-associated protein 1                                       |
| maker-11-augustus-gene-145.11-mRNA-1 | Japonica | NA       |           | Os11g0484300 | OsR498G1120152300.01.T01 | DNA replication licensing factor MCM2                                     |
| maker-11-augustus-gene-145.13-mRNA-1 | Japonica | NA       |           |              | OsR498G1120152500.01.T02 | Bifunctional dihydrofolate reductase-thymidylate synthase                 |
| maker-11-augustus-gene-145.18-mRNA-1 | Japonica | NA       |           | Os11g0487600 | OsR498G1120153700.01.T02 | Cytochrome P450 family 78 subfamily A polypeptide 8                       |
| maker-11-augustus-gene-145.21-mRNA-1 | Japonica | NA       |           | Os11g0484000 | OsR498G1120151800.01.T02 | Probable bifunctional methylthioribulose-1-phosphate dehydratase/enolase  |
| maker-11-augustus-gene-145.5-mRNA-1  | Japonica | Japonica |           | Os11g0483900 | OsR498G1120151500.01.T04 | ELMO domain-containing protein A                                          |
| maker-11-augustus-gene-145.9-mRNA-1  | Japonica | NA       |           |              |                          | DNA replication licensing factor MCM2                                     |
| maker-11-augustus-gene-146.0-mRNA-1  | Japonica | NA       |           | Os11g0488600 | OsR498G1120154700.01.T02 | ABC transporter domain-containing protein                                 |
| maker-11-augustus-gene-146.10-mRNA-1 | Japonica | NA       |           | Os11g0488500 | OsR498G1120155000.01.T01 | Alkylated DNA repair protein alkB isogeny                                 |
| maker-11-augustus-gene-148.29-mRNA-1 | Japonica | NA       |           | Os11g0490600 | OsR498G1120166100.01.T01 |                                                                           |
| maker-11-augustus-gene-148.31-mRNA-1 | Japonica | NA       |           |              | OsR498G1120167100.01.T01 | Non-intrinsic ABC protein 14                                              |
| maker-11-augustus-gene-148.34-mRNA-1 | Japonica | NA       |           | Os11g0490900 | OsR498G1120167900.01.T01 | WRKY transcription factor                                                 |
| maker-11-augustus-gene-148.36-mRNA-1 | Japonica | NA       |           | Os11g0491400 | OsR498G1120168100.01.T03 | Lipase/lipoxygenase, putative isoform 3                                   |
| maker-11-augustus-gene-149.35-mRNA-1 | Japonica | Indica   |           | Os11g0492700 | OsR498G1120174100.01.T01 | AB hydrolase-1 domain-containing protein (Fragment)                       |
| maker-11-augustus-gene-149.40-mRNA-1 | Japonica | NA       | CC-NBS-TM | Os11g0493700 |                          | NB-ARC domain containing protein, expressed                               |
| maker-11-augustus-gene-149.41-mRNA-1 | Japonica | Indica   |           | Os11g0492100 | OsR498G1120172400.01.T01 | NB-ARC domain containing protein, expressed                               |
| maker-11-augustus-gene-15.28-mRNA-1  | Japonica | Indica   |           | Os12g0145400 | OsR498G1119414500.01.T01 | Protein trichome birefringence-like 10                                    |
| maker-11-augustus-gene-15.30-mRNA-1  | Japonica | Indica   |           | Os12g0145500 | OsR498G1119414700.01.T01 | Peptidylprolyl isomerase                                                  |
| maker-11-augustus-gene-15.35-mRNA-1  | Japonica | NA       |           | Os11g0148400 | OsR498G1119414900.01.T02 | Peptidylprolyl isomerase                                                  |
| maker-11-augustus-gene-15.41-mRNA-1  | Japonica | NA       |           | Os11g0147800 | OsR498G1119413400.01.T03 | Stem-specific protein TSJ1                                                |
| maker-11-augustus-gene-15.47-mRNA-1  | Japonica | NA       |           | Os11g0148500 | OsR498G1119415200.01.T01 | Pyruvate kinase                                                           |
| maker-11-augustus-gene-15.56-mRNA-1  | Japonica | NA       |           | Os11g0148600 | OsR498G1119415400.01.T01 |                                                                           |
| maker-11-augustus-gene-15.58-mRNA-1  | Japonica | Indica   |           | Os11g0148700 | OsR498G1119415600.01.T01 | DDT domain-containing protein PTM                                         |
| maker-11-augustus-gene-15.62-mRNA-1  | Japonica | Indica   |           | Os11g0148800 | OsR498G1119415800.01.T04 | DDT domain-containing protein PTM                                         |
| maker-11-augustus-gene-150.0-mRNA-1  | Japonica | NA       | CC-NBS-TM |              | OsR498G1120176700.01.T01 | NBS-LRR type resistance protein (Fragment)                                |
| maker-11-augustus-gene-150.2-mRNA-1  | Japonica | NA       | CC-NBS-TM | Os11g0495032 |                          | NB-ARC domain containing protein, expressed                               |
| maker-11-augustus-gene-151.31-mRNA-1 | Japonica | NA       |           | Os11g0497000 | OsR498G1120184700.01.T01 | Ubiquitin-activating enzyme E                                             |
| maker-11-augustus-gene-151.37-mRNA-1 | Japonica | NA       |           |              | OsR498G1120182000.01.T01 | CBS-PB1 domain contining protein                                          |
| maker-11-augustus-gene-151.40-mRNA-1 | Japonica | NA       |           |              | OsR498G1120183000.01.T03 | Squamosa promoter-binding protein 15                                      |
| maker-11-augustus-gene-152.33-mRNA-1 | Japonica | NA       |           | Os11g0498400 | OsR498G1120186500.01.T01 | Zinc finger protein 511                                                   |
| maker-11-augustus-gene-152.36-mRNA-1 | Japonica | NA       |           |              |                          |                                                                           |
| maker-11-augustus-gene-153.0-mRNA-1  | Japonica | NA       |           |              |                          |                                                                           |
| maker-11-augustus-gene-153.10-mRNA-1 | Japonica | Indica   |           | Os11g0499600 | OsR498G1120188500.01.T01 | Cis-2,3-dihydrobiphenyl-2,3-diol dehydrogenase                            |
| maker-11-augustus-gene-154.41-mRNA-1 | Japonica | Indica   |           | Os11g0501500 | OsR498G1120193400.01.T01 |                                                                           |
| maker-11-augustus-gene-154.43-mRNA-1 | Japonica | NA       |           | Os11g0502700 | OsR498G1120196500.01.T01 | Acetylglucosaminyltransferase family protein                              |
| maker-11-augustus-gene-154.43-mRNA-1 | Japonica | NA       |           | Os11g0503400 | OsR498G1120197300.01.T02 |                                                                           |
| maker-11-augustus-gene-154.45-mRNA-1 | Japonica | NA       |           | Os11g0503900 | OsR498G1120197700.01.T01 | Sulfotransferase                                                          |
| maker-11-augustus-gene-154.47-mRNA-1 | Japonica | NA       |           | Os11g0504000 |                          | Putative transposable element                                             |
| maker-11-augustus-gene-155.2-mRNA-1  | Japonica | NA       |           |              | OsR498G1120204600.01.T01 |                                                                           |
| maker-11-augustus-gene-156.31-mRNA-1 | Japonica | NA       |           | Os11g0507200 | OsR498G1120205300.01.T01 | Omega-hydroxypalmitate O-feruloyl transferase                             |
| maker-11-augustus-gene-156.35-mRNA-1 | Japonica | Japonica |           | Os11g0507400 | OsR498G1120206200.01.T01 | Rhamnogalacturonate lyase family protein                                  |
| maker-11-augustus-gene-156.38-mRNA-1 | Japonica | NA       |           | Os11g0508600 | OsR498G1120210200.01.T01 | Bidirectional sugar transporter SWEET                                     |
| maker-11-augustus-gene-158.0-mRNA-1  | Japonica | NA       |           | Os11g0512000 | OsR498G1120212100.01.T01 | NAC domain-containing protein 78                                          |
| maker-11-augustus-gene-158.2-mRNA-1  | Japonica | NA       |           |              | OsR498G1120212300.01.T01 | No apical meristem protein, expressed                                     |
| maker-11-augustus-gene-158.6-mRNA-1  | Japonica | NA       |           |              | OsR498G1120213100.01.T01 | NAC domain-containing protein                                             |
| maker-11-augustus-gene-159.0-mRNA-1  | Japonica | NA       |           |              |                          |                                                                           |
| maker-11-augustus-gene-159.18-mRNA-1 | Japonica | NA       | LRR-TM    | Os11g0514400 | OsR498G1120215800.01.T01 | Somatic embryogenesis receptor kinase 1                                   |
| maker-11-augustus-gene-159.21-mRNA-1 | Japonica | Indica   | LRR-TM    | Os11g0514500 | OsR498G1120216000.01.T01 | BRASSINOSTEROID INSENSITIVE 1-associated receptor kinase 1, putative, exp |
| maker-11-augustus-gene-159.26-mRNA-1 | Japonica | Indica   | LRR-TM    | Os11g0514600 | OsR498G1120216600.01.T01 | Somatic embryogenesis receptor kinase 1                                   |
| maker-11-augustus-gene-159.29-mRNA-1 | Japonica | Japonica | LRR-TM    | Os11g0514700 | OsR498G1120218000.01.T01 | Somatic embryogenesis receptor kinase 1                                   |
| maker-11-augustus-gene-159.32-mRNA-1 | Japonica | NA       |           | Os11g0514800 | OsR498G1120218600.01.T02 | BRO1 domain-containing protein BROX                                       |
| maker-11-augustus-gene-159.4-mRNA-1  | Japonica | NA       |           | Os11g0514000 | OsR498G1120216800.01.T02 | Putative histidine kinase-like ATPase domain-containing protein           |
| maker-11-augustus-gene-16.0-mRNA-1   | Japonica | NA       |           | Os11g0149100 | OsR498G1119416900.01.T01 | AT-hook motif nuclear-localized protein (Fragment)                        |
| maker-11-augustus-gene-16.12-mRNA-1  | Japonica | Indica   |           | Os03g0793100 | OsR498G1119421100.01.T02 | Glycosyltransferases                                                      |

|                                      |          |          |           |              |                          |                                                                 |
|--------------------------------------|----------|----------|-----------|--------------|--------------------------|-----------------------------------------------------------------|
| maker-11-augustus-gene-16.16-mRNA-1  | Japonica | Japonica | Kinase-TM | Os11g0150700 | OsR498G1119421300.01.T01 | Serine/threonine-protein kinase D6PKL2                          |
| maker-11-augustus-gene-16.18-mRNA-1  | Japonica | NA       |           | Os11g0150400 | OsR498G1119420600.01.T01 | Stress-response A/B barrel domain-containing protein (Fragment) |
| maker-11-augustus-gene-16.20-mRNA-1  | Japonica | Indica   |           | Os11g0150450 | OsR498G1119420800.01.T02 | RING-H2 finger protein ATL38                                    |
| maker-11-augustus-gene-16.3-mRNA-1   | Japonica | NA       |           | Os11g0149400 | OsR498G1119418100.01.T01 | Phytosulfokine-alpha                                            |
| maker-11-augustus-gene-16.6-mRNA-1   | Japonica | NA       |           | Os11g0150100 | OsR498G1119419700.01.T04 | probable 2-carboxy-D-arabinitol-1-phosphatase                   |
| maker-11-augustus-gene-16.9-mRNA-1   | Japonica | NA       |           | Os11g0150200 | OsR498G1119420100.01.T04 |                                                                 |
| maker-11-augustus-gene-160.8-mRNA-1  | Japonica | NA       |           | Os11g0515500 | OsR498G1120221400.01.T02 | Auxin signaling F-box protein 2                                 |
| maker-11-augustus-gene-163.3-mRNA-1  | Japonica | Japonica |           | Os11g0520500 | OsR498G1120235900.01.T02 | Coiled-coil domain-containing protein SCD2                      |
| maker-11-augustus-gene-163.8-mRNA-1  | Japonica | NA       |           | Os11g0522900 | OsR498G1120238700.01.T01 | Carboxypeptidase                                                |
| maker-11-augustus-gene-164.0-mRNA-1  | Japonica | NA       |           | Os11g0523110 | OsR498G1120240900.01.T01 | zerumbone synthase                                              |
| maker-11-augustus-gene-164.2-mRNA-1  | Japonica | NA       |           |              | OsR498G1120242700.01.T01 |                                                                 |
| maker-11-augustus-gene-164.4-mRNA-1  | Japonica | NA       |           | Os11g0523700 | OsR498G1120244700.01.T01 | Inducer of CBF expression                                       |
| maker-11-augustus-gene-164.6-mRNA-1  | Japonica | Indica   |           | Os03g0193700 | OsR498G1120243200.01.T01 | Geranylgeranyl transferase type-2 subunit beta                  |
| maker-11-augustus-gene-164.9-mRNA-1  | Japonica | NA       |           | Os11g0523800 | OsR498G1120245800.01.T02 | Auxin response factor                                           |
| maker-11-augustus-gene-165.0-mRNA-1  | Japonica | NA       |           | Os11g0524300 | OsR498G1120247700.01.T01 | Chromophore lyase CRL chloroplastic                             |
| maker-11-augustus-gene-165.14-mRNA-1 | Japonica | NA       | CC-NBS-TM |              | OsR498G1120249800.01.T02 | NBS-LRR-like resistance protein (Fragment)                      |
| maker-11-augustus-gene-165.6-mRNA-1  | Japonica | NA       |           | Os11g0525600 | OsR498G1120252900.01.T01 | Alpha-mannosidase                                               |
| maker-11-augustus-gene-166.0-mRNA-1  | Japonica | NA       |           | Os11g0525700 | OsR498G1120253100.01.T01 | DCD domain-containing protein (Fragment)                        |
| maker-11-augustus-gene-166.11-mRNA-1 | Japonica | NA       |           | Os11g0525800 | OsR498G1120253400.01.T01 | N-acetyltransferase MAK3 isogeny                                |
| maker-11-augustus-gene-166.14-mRNA-1 | Japonica | NA       |           |              | OsR498G1120259000.01.T02 | FBD domain-containing protein                                   |
| maker-11-augustus-gene-166.4-mRNA-1  | Japonica | Indica   |           | Os11g0526200 | OsR498G1120254900.01.T01 | Cofactor assembly of complex C subunit B                        |
| maker-11-augustus-gene-166.9-mRNA-1  | Japonica | Indica   |           | Os07g0278866 | OsR498G1120261100.01.T02 | ATPase inhibitor                                                |
| maker-11-augustus-gene-167.0-mRNA-1  | Japonica | NA       |           |              |                          | No exine formation 1                                            |
| maker-11-augustus-gene-167.13-mRNA-1 | Japonica | NA       |           | Os11g0528500 | OsR498G1120263000.01.T01 | Rubredoxin-like domain-containing protein (Fragment)            |
| maker-11-augustus-gene-167.16-mRNA-1 | Japonica | Indica   |           | Os11g0528700 | OsR498G1120263200.01.T01 | Indole-3-acetic acid-amido synthetase                           |
| maker-11-augustus-gene-167.2-mRNA-1  | Japonica | NA       |           | Os11g0528300 | OsR498G1120262500.01.T01 | Succinate dehydrogenase assembly factor 2 mitochondrial         |
| maker-11-augustus-gene-167.20-mRNA-1 | Japonica | NA       |           | Os11g0529500 | OsR498G1120265600.01.T01 | Bisdemethoxycurcumin synthase                                   |
| maker-11-augustus-gene-167.22-mRNA-1 | Japonica | Japonica |           | Os11g0529900 | OsR498G1120266400.01.T01 | Bisdemethoxycurcumin synthase                                   |
| maker-11-augustus-gene-167.4-mRNA-1  | Japonica | NA       |           | Os12g0512200 |                          | Transposon protein, putative, Mariner sub-class                 |
| maker-11-augustus-gene-167.7-mRNA-1  | Japonica | Japonica |           | Os11g0529800 | OsR498G1120266100.01.T01 | Bisdemethoxycurcumin synthase                                   |
| maker-11-augustus-gene-167.9-mRNA-1  | Japonica | NA       |           | Os11g0528400 | OsR498G1120262800.01.T02 | Aminopeptidase                                                  |
| maker-11-augustus-gene-168.23-mRNA-1 | Japonica | NA       |           |              | OsR498G1018146800.01.T01 |                                                                 |
| maker-11-augustus-gene-168.27-mRNA-1 | Japonica | NA       |           | Os11g0531300 | OsR498G1120272700.01.T01 | CCHC-type domain-containing protein                             |
| maker-11-augustus-gene-168.29-mRNA-1 | Japonica | NA       |           | Os11g0531700 | OsR498G1120274700.01.T02 | Nudix hydrolase                                                 |
| maker-11-augustus-gene-168.32-mRNA-1 | Japonica | NA       |           | Os11g0530600 | OsR498G1120269200.01.T01 | Chalcone synthase                                               |
| maker-11-augustus-gene-169.30-mRNA-1 | Japonica | Japonica |           | Os11g0532600 | OsR498G1120276200.01.T01 | FBD domain-containing protein                                   |
| maker-11-augustus-gene-169.35-mRNA-1 | Japonica | NA       |           |              | OsR498G1120277500.01.T03 |                                                                 |
| maker-11-augustus-gene-169.45-mRNA-1 | Japonica | NA       |           | Os11g0533100 | OsR498G1120278000.01.T01 | CarD-like transcriptional regulator family protein, expressed   |
| maker-11-augustus-gene-169.54-mRNA-1 | Japonica | NA       |           | Os11g0533800 | OsR498G1120279400.01.T07 | FBD domain-containing protein                                   |
| maker-11-augustus-gene-17.42-mRNA-1  | Japonica | Indica   |           | Os11g0151100 | OsR498G1119422500.01.T01 | Root cap periphery protein 2                                    |
| maker-11-augustus-gene-17.45-mRNA-1  | Japonica | Indica   |           | Os11g0151800 | OsR498G1119427900.01.T01 | Purple acid phosphatase                                         |
| maker-11-augustus-gene-17.48-mRNA-1  | Japonica | NA       |           |              | OsR498G1119428100.01.T01 |                                                                 |
| maker-11-augustus-gene-17.50-mRNA-1  | Japonica | Indica   |           | Os12g0149900 | OsR498G1119421800.01.T01 | IQ domain-containing protein IQM3                               |
| maker-11-augustus-gene-17.54-mRNA-1  | Japonica | NA       |           | Os11g0151500 | OsR498G1119426800.01.T02 | Hippocampus abundant transcript-like protein 1                  |
| maker-11-augustus-gene-17.60-mRNA-1  | Japonica | NA       |           | Os12g0256300 | OsR498G1221220300.01.T01 | MI domain-containing protein                                    |
| maker-11-augustus-gene-17.65-mRNA-1  | Japonica | Indica   |           | Os11g0151700 | OsR498G1119427200.01.T01 | Purple acid phosphatase                                         |
| maker-11-augustus-gene-17.67-mRNA-1  | Japonica | NA       |           | Os11g0152500 | OsR498G1119431200.01.T01 | Terminal flower 1                                               |
| maker-11-augustus-gene-17.70-mRNA-1  | Japonica | NA       |           | Os11g0152700 | OsR498G1119432000.01.T01 | Transcription factor TGAL11                                     |
| maker-11-augustus-gene-170.27-mRNA-1 | Japonica | NA       |           | Os11g0534300 | OsR498G1120281000.01.T01 | S-acyltransferase                                               |
| maker-11-augustus-gene-171.0-mRNA-1  | Japonica | NA       |           |              | OsR498G1120287900.01.T01 | SNARE associated Golgi protein family                           |
| maker-11-augustus-gene-171.12-mRNA-1 | Japonica | NA       |           | Os11g0536800 | OsR498G1120287000.01.T02 | Amidase domain-containing protein (Fragment)                    |
| maker-11-augustus-gene-171.2-mRNA-1  | Japonica | NA       |           | Os11g0120700 | OsR498G1119336000.01.T01 |                                                                 |
| maker-11-augustus-gene-171.4-mRNA-1  | Japonica | NA       |           | Os11g0538900 | OsR498G1120292700.01.T01 | Citrate synthase                                                |
| maker-11-augustus-gene-172.0-mRNA-1  | Japonica | NA       |           | Os11g0539200 | OsR498G1120293500.01.T01 | Xyloglucan endotransglucosylase/hydrolase                       |
| maker-11-augustus-gene-172.13-mRNA-1 | Japonica | NA       |           |              |                          | Xaa-Pro aminopeptidase P                                        |
| maker-11-augustus-gene-172.18-mRNA-1 | Japonica | Indica   |           | Os11g0540100 | OsR498G1120296000.01.T02 | Xaa-Pro aminopeptidase                                          |
| maker-11-augustus-gene-172.2-mRNA-1  | Japonica | Indica   |           | Os11g0539700 | OsR498G1120295700.01.T01 | F-box domain containing protein, expressed                      |
| maker-11-augustus-gene-172.5-mRNA-1  | Japonica | NA       |           | Os11g0540600 | OsR498G1120297100.01.T01 |                                                                 |
| maker-11-augustus-gene-172.7-mRNA-1  | Japonica | Japonica |           | Os11g0539500 | OsR498G1120294800.01.T01 | 5-pentadecatrienyl resorcinol O-methyltransferase               |
| maker-11-augustus-gene-172.9-mRNA-1  | Japonica | Indica   |           | Os11g0539600 | OsR498G1120295400.01.T01 | F-box domain containing protein, expressed                      |
| maker-11-augustus-gene-173.44-mRNA-1 | Japonica | NA       |           | Os11g0540900 |                          |                                                                 |

|                                      |          |          |               |              |                          |                                                                            |
|--------------------------------------|----------|----------|---------------|--------------|--------------------------|----------------------------------------------------------------------------|
| maker-11-augustus-gene-173.46-mRNA-1 | Japonica | NA       |               |              | OsR498G1119817100.01.T01 | Transposon protein, putative, CACTA, En/Spm sub-class                      |
| maker-11-augustus-gene-173.49-mRNA-1 | Japonica | Indica   |               | Os11g0540900 | OsR498G1120304700.01.T02 |                                                                            |
| maker-11-augustus-gene-173.50-mRNA-1 | Japonica | Japonica |               | Os11g0541600 | OsR498G1120304700.01.T01 |                                                                            |
| maker-11-augustus-gene-173.54-mRNA-1 | Japonica | NA       |               |              |                          |                                                                            |
| maker-11-augustus-gene-174.0-mRNA-1  | Japonica | NA       |               |              | OsR498G1120154400.01.T01 | Endonuclease                                                               |
| maker-11-augustus-gene-174.3-mRNA-1  | Japonica | Japonica |               | Os11g0543300 | OsR498G1120311100.01.T01 |                                                                            |
| maker-11-augustus-gene-174.5-mRNA-1  | Japonica | NA       |               | Os11g0543500 | OsR498G1120311400.01.T01 | Heparan-alpha-glucosaminide N-acetyltransferase-like isoform X1            |
| maker-11-augustus-gene-175.50-mRNA-1 | Japonica | NA       |               |              | OsR498G1120311600.01.T06 | Xpo1 domain-containing protein (Fragment)                                  |
| maker-11-augustus-gene-175.54-mRNA-1 | Japonica | Japonica |               | Os11g0544100 | OsR498G1120312000.01.T01 | Protein AUXIN RESPONSE 4                                                   |
| maker-11-augustus-gene-175.56-mRNA-1 | Japonica | NA       |               | Os11g0544200 | OsR498G1120312200.01.T02 | Arginine/serine-rich coiled coil                                           |
| maker-11-augustus-gene-175.61-mRNA-1 | Japonica | NA       |               |              |                          | GDT1-like protein 2, chloroplastic                                         |
| maker-11-augustus-gene-175.66-mRNA-1 | Japonica | NA       |               | Os11g0544800 | OsR498G1120315000.01.T02 | Glutamyl-tRNA(Gln) amidotransferase subunit B, chloroplastic/mitochondrial |
| maker-11-augustus-gene-175.71-mRNA-1 | Japonica | Japonica |               | Os11g0545000 | OsR498G1120315800.01.T02 | NOP5NT domain-containing protein                                           |
| maker-11-augustus-gene-176.0-mRNA-1  | Japonica | NA       |               |              |                          | Ubiquitin carboxyl-terminal hydrolase family protein, expressed            |
| maker-11-augustus-gene-176.11-mRNA-1 | Japonica | NA       |               | Os04g0101300 | OsR498G0407412900.01.T05 | MRG domain-containing protein                                              |
| maker-11-augustus-gene-176.18-mRNA-1 | Japonica | NA       |               |              | OsR498G1120320600.01.T02 | RZZ complex                                                                |
| maker-11-augustus-gene-176.2-mRNA-1  | Japonica | NA       |               | Os11g0546000 | OsR498G1120321500.01.T01 | 68 kDa protein HP68                                                        |
| maker-11-augustus-gene-176.25-mRNA-1 | Japonica | NA       |               | Os11g0545800 | OsR498G1120321000.01.T01 | Ultraviolet-B receptor like                                                |
| maker-11-augustus-gene-176.28-mRNA-1 | Japonica | NA       | NBS-TM        |              | OsR498G1120322000.01.T02 | Armado repeat-containing protein 7                                         |
| maker-11-augustus-gene-176.32-mRNA-1 | Japonica | NA       |               | Os11g0546300 | OsR498G1120322200.01.T03 | Patatin                                                                    |
| maker-11-augustus-gene-176.6-mRNA-1  | Japonica | NA       |               | Os11g0546100 | OsR498G1120321700.01.T01 | Transmembrane receptor, eukaryota                                          |
| maker-11-augustus-gene-177.0-mRNA-1  | Japonica | NA       |               | Os11g0546900 | OsR498G1120324100.01.T01 | G-box binding factor                                                       |
| maker-11-augustus-gene-177.4-mRNA-1  | Japonica | Indica   |               | Os03g0708000 | OsR498G1120323400.01.T01 | Secretory phospholipase A2                                                 |
| maker-11-augustus-gene-178.0-mRNA-1  | Japonica | NA       |               | Os07g0514400 |                          | DUF629 domain-containing protein                                           |
| maker-11-augustus-gene-178.24-mRNA-1 | Japonica | NA       |               |              | OsR498G1120327200.01.T01 | Binding partner of ACD11 1                                                 |
| maker-11-augustus-gene-178.27-mRNA-1 | Japonica | Japonica |               | Os11g0549615 | OsR498G0305541500.01.T01 | Purple acid phosphatase                                                    |
| maker-11-augustus-gene-178.29-mRNA-1 | Japonica | NA       |               | Os11g0549620 | OsR498G1120328800.01.T01 | Purple acid phosphatase                                                    |
| maker-11-augustus-gene-178.3-mRNA-1  | Japonica | NA       |               | Os11g0549610 |                          | DUF629 domain-containing protein                                           |
| maker-11-augustus-gene-178.31-mRNA-1 | Japonica | NA       |               |              | OsR498G1120329400.01.T01 |                                                                            |
| maker-11-augustus-gene-178.9-mRNA-1  | Japonica | NA       |               |              | OsR498G1120330300.01.T02 | ABC1 domain-containing protein (Fragment)                                  |
| maker-11-augustus-gene-179.38-mRNA-1 | Japonica | Indica   |               | Os11g0549700 | OsR498G1120331100.01.T01 | S-acyltransferase                                                          |
| maker-11-augustus-gene-179.42-mRNA-1 | Japonica | NA       |               |              | OsR498G1120330600.01.T01 | CDP-diacylglycerol synthase                                                |
| maker-11-augustus-gene-179.50-mRNA-1 | Japonica | NA       |               |              | OsR498G1120330600.01.T01 | CDP-diacylglycerol synthase                                                |
| maker-11-augustus-gene-179.54-mRNA-1 | Japonica | Indica   |               | Os11g0549600 | OsR498G1120331000.01.T01 | Maf-like protein isoform B                                                 |
| maker-11-augustus-gene-18.0-mRNA-1   | Japonica | NA       |               | Os11g0153400 | OsR498G1119433900.01.T02 | Rho GTPase-activating protein gacA                                         |
| maker-11-augustus-gene-18.15-mRNA-1  | Japonica | NA       |               | Os11g0153800 | OsR498G1119435300.01.T01 | 40S ribosomal protein S25                                                  |
| maker-11-augustus-gene-18.16-mRNA-1  | Japonica | NA       |               |              |                          | 40S ribosomal protein S25                                                  |
| maker-11-augustus-gene-18.23-mRNA-1  | Japonica | NA       |               | Os11g0153900 | OsR498G1119435900.01.T01 | Ribonuclease                                                               |
| maker-11-augustus-gene-18.28-mRNA-1  | Japonica | NA       | NAC17         | Os11g0154500 | OsR498G1119437300.01.T01 | NAC domain-containing protein 90                                           |
| maker-11-augustus-gene-18.3-mRNA-1   | Japonica | Indica   |               | Os11g0153700 | OsR498G1119434700.01.T02 | SRP54 domain-containing protein (Fragment)                                 |
| maker-11-augustus-gene-18.30-mRNA-1  | Japonica | NA       |               |              | OsR498G1119437500.01.T01 | DNA-binding factor of bZIP class                                           |
| maker-11-augustus-gene-18.34-mRNA-1  | Japonica | Indica   |               | Os12g0156400 | OsR498G1119438100.01.T01 | mRNA-decapping enzyme-like protein isoform X1                              |
| maker-11-augustus-gene-18.9-mRNA-1   | Japonica | NA       |               | Os11g0153700 | OsR498G1119435100.01.T02 | SRP54 domain-containing protein (Fragment)                                 |
| maker-11-augustus-gene-180.11-mRNA-1 | Japonica | Japonica |               | Os11g0550900 | OsR498G1120334400.01.T01 |                                                                            |
| maker-11-augustus-gene-180.15-mRNA-1 | Japonica | Indica   |               | Os11g0551350 | OsR498G1120335400.01.T03 |                                                                            |
| maker-11-augustus-gene-180.19-mRNA-1 | Japonica | NA       |               | Os11g0551800 | OsR498G1120336600.01.T05 | Yippee domain-containing protein                                           |
| maker-11-augustus-gene-180.2-mRNA-1  | Japonica | NA       | CC-NBS-TM     | Os11g0551700 |                          | Disease resistance protein RPM1                                            |
| maker-11-augustus-gene-180.22-mRNA-1 | Japonica | NA       |               | Os11g0552000 |                          | probable aminotransferase TAT2                                             |
| maker-11-augustus-gene-180.26-mRNA-1 | Japonica | NA       |               | Os11g0552100 | OsR498G1120337800.01.T01 | DUF724 domain-containing protein 2                                         |
| maker-11-augustus-gene-180.4-mRNA-1  | Japonica | NA       |               | Os11g0551900 | OsR498G1120336900.01.T01 | Growth-regulating factor like                                              |
| maker-11-augustus-gene-180.8-mRNA-1  | Japonica | NA       |               |              | OsR498G1120337900.01.T02 | DUF724 domain-containing protein 2                                         |
| maker-11-augustus-gene-181.30-mRNA-1 | Japonica | NA       | CC-NBS-TM     |              |                          | Rust resistance protein RP1-D homolog                                      |
| maker-11-augustus-gene-181.32-mRNA-1 | Japonica | Indica   |               | Os11g0552600 | OsR498G1120340200.01.T01 | Kinesin-like protein KIN-7L                                                |
| maker-11-augustus-gene-182.0-mRNA-1  | Japonica | NA       |               | Os11g0557000 | OsR498G1120348100.01.T01 | Phytosulfokine-alpha                                                       |
| maker-11-augustus-gene-182.14-mRNA-1 | Japonica | NA       |               |              | OsR498G1120351700.01.T01 | rRNA N-glycosidase                                                         |
| maker-11-augustus-gene-182.18-mRNA-1 | Japonica | NA       |               | Os12g0512200 |                          | Transposon protein, putative, Mariner sub-class                            |
| maker-11-augustus-gene-182.2-mRNA-1  | Japonica | NA       |               | Os11g0557700 | OsR498G1120349100.01.T01 | S-adenosylmethionine-dependent methyltransferase/ catalytic                |
| maker-11-augustus-gene-182.21-mRNA-1 | Japonica | NA       |               | Os11g0558200 | OsR498G1120350400.01.T01 | Transcription factor MYB3                                                  |
| maker-11-augustus-gene-182.24-mRNA-1 | Japonica | NA       |               |              | OsR498G1120357900.01.T01 |                                                                            |
| maker-11-augustus-gene-182.6-mRNA-1  | Japonica | NA       |               | Os11g0557900 | OsR498G1120349900.01.T01 | Actin-related protein 2/3 complex subunit 5                                |
| maker-11-augustus-gene-183.28-mRNA-1 | Japonica | NA       | Kinase-LRR-TM | Os11g0559200 | OsR498G1120353500.01.T01 | Receptor kinase, putative, expressed                                       |

|                                      |          |          |               |              |                          |                                                                            |
|--------------------------------------|----------|----------|---------------|--------------|--------------------------|----------------------------------------------------------------------------|
| maker-11-augustus-gene-184.0-mRNA-1  | Japonica | NA       | LRR-TM        |              |                          |                                                                            |
| maker-11-augustus-gene-184.2-mRNA-1  | Japonica | NA       |               |              |                          | Terpene cyclase/mutase family member                                       |
| maker-11-augustus-gene-185.0-mRNA-1  | Japonica | NA       | Kinase-TM     | Os11g0565300 | OsR498G1120370600.01.T01 | Wall-associated receptor kinase 2                                          |
| maker-11-augustus-gene-185.3-mRNA-1  | Japonica | NA       |               |              | OsR498G1120370800.01.T02 | E3 ubiquitin-protein like                                                  |
| maker-11-augustus-gene-186.38-mRNA-1 | Japonica | Japonica |               | Os11g0566800 | OsR498G1120376700.01.T01 | Chalcone and stilbene synthases, N-terminal domain containing protein, exp |
| maker-11-augustus-gene-187.0-mRNA-1  | Japonica | NA       |               | Os11g0568600 | OsR498G1120379700.01.T04 | THUMP domain-containing protein 1                                          |
| maker-11-augustus-gene-187.12-mRNA-1 | Japonica | Japonica | Kinase        | Os11g0568800 | OsR498G1120381200.01.T01 | Protein kinase domain-containing protein                                   |
| maker-11-augustus-gene-187.15-mRNA-1 | Japonica | Japonica | Kinase-LRR-TM | Os11g0569300 | OsR498G1120383600.01.T02 | Leucin-rich receptor-like kinase                                           |
| maker-11-augustus-gene-187.20-mRNA-1 | Japonica | Japonica | Kinase-LRR-TM | Os11g0569500 | OsR498G1120381200.01.T01 | Putative LRR receptor-like serine/threonine-protein kinase                 |
| maker-11-augustus-gene-187.5-mRNA-1  | Japonica | NA       |               | Os11g0568700 | OsR498G1120380300.01.T05 | Formin-E like                                                              |
| maker-11-augustus-gene-187.9-mRNA-1  | Japonica | NA       |               | Os11g0568300 | OsR498G1120379000.01.T01 | Cell division cycle-associated protein 7                                   |
| maker-11-augustus-gene-188.40-mRNA-1 | Japonica | Indica   | Kinase-LRR-TM | Os11g0569600 | OsR498G1120386200.01.T01 | Receptor kinase-like protein (Fragment)                                    |
| maker-11-augustus-gene-188.45-mRNA-1 | Japonica | NA       |               | Os11g0570400 | OsR498G1120387200.01.T01 |                                                                            |
| maker-11-augustus-gene-189.4-mRNA-1  | Japonica | NA       | NBS-TM        | Os11g0572100 | OsR498G1120391500.01.T01 | Replication factor C subunit 1                                             |
| maker-11-augustus-gene-19.0-mRNA-1   | Japonica | NA       |               | Os11g0155500 | OsR498G1119440500.01.T01 | Cationic amino acid transporter                                            |
| maker-11-augustus-gene-19.11-mRNA-1  | Japonica | NA       |               | Os11g0156000 | OsR498G1119443000.01.T01 | TF-B3 domain-containing protein (Fragment)                                 |
| maker-11-augustus-gene-19.14-mRNA-1  | Japonica | NA       |               | Os11g0156200 | OsR498G1119443600.01.T01 | Prolylcarboxypeptidase                                                     |
| maker-11-augustus-gene-19.3-mRNA-1   | Japonica | NA       |               |              | OsR498G1119440800.01.T01 | Multidrug resistance-associated protein3                                   |
| maker-11-augustus-gene-190.0-mRNA-1  | Japonica | NA       |               | Os11g0572400 | OsR498G1120393700.01.T01 | Sialyltransferase-like protein 1                                           |
| maker-11-augustus-gene-190.12-mRNA-1 | Japonica | NA       |               |              |                          | Zinc knuckle (CCHC-type) family protein                                    |
| maker-11-augustus-gene-190.15-mRNA-1 | Japonica | NA       |               |              | OsR498G1120393600.01.T01 | NB-ARC domain-containing protein                                           |
| maker-11-augustus-gene-190.17-mRNA-1 | Japonica | NA       |               |              | OsR498G1120394000.01.T01 | E3 ubiquitin-protein ligase RHF2A                                          |
| maker-11-augustus-gene-190.22-mRNA-1 | Japonica | NA       |               | Os11g0572800 | OsR498G1120394400.01.T01 | Bifunctional arginine demethylase andlysyl-hydroxylase JMJD6               |
| maker-11-augustus-gene-190.24-mRNA-1 | Japonica | NA       |               |              | OsR498G1120395000.01.T01 | GATA transcription factor                                                  |
| maker-11-augustus-gene-190.26-mRNA-1 | Japonica | NA       |               |              | OsR498G1120395200.01.T01 | Ubiquitinyl hydrolase 1                                                    |
| maker-11-augustus-gene-190.5-mRNA-1  | Japonica | Indica   |               | Os11g0572700 | OsR498G1120394100.01.T01 | Prolycopene isomerase, chloroplastic                                       |
| maker-11-augustus-gene-191.35-mRNA-1 | Japonica | NA       |               |              |                          | J domain-containing protein (Fragment)                                     |
| maker-11-augustus-gene-191.36-mRNA-1 | Japonica | Indica   |               | Os11g0574200 | OsR498G1120403500.01.T01 | J domain-containing protein                                                |
| maker-11-augustus-gene-192.2-mRNA-1  | Japonica | NA       |               |              | OsR498G1120396500.01.T01 | Myosin-binding protein 7                                                   |
| maker-11-augustus-gene-192.4-mRNA-1  | Japonica | NA       |               |              |                          | DUF295 domain-containing protein (Fragment)                                |
| maker-11-augustus-gene-192.5-mRNA-1  | Japonica | NA       |               |              | OsR498G1120399100.01.T01 |                                                                            |
| maker-11-augustus-gene-193.0-mRNA-1  | Japonica | NA       |               | Os04g0590366 | OsR498G0407482700.01.T01 | DDE Tnp4 domain-containing protein                                         |
| maker-11-augustus-gene-193.3-mRNA-1  | Japonica | NA       |               |              | OsR498G1120402100.01.T01 | C2H2-type domain-containing protein                                        |
| maker-11-augustus-gene-193.7-mRNA-1  | Japonica | NA       |               | Os11g0574200 |                          | J domain-containing protein                                                |
| maker-11-augustus-gene-194.34-mRNA-1 | Japonica | NA       |               | Os11g0579800 | OsR498G1120405900.01.T02 | H/ACA ribonucleoprotein complex subunit                                    |
| maker-11-augustus-gene-194.36-mRNA-1 | Japonica | NA       |               | Os11g0580000 | OsR498G1120406500.01.T01 | Survival motor neuron interacting protein 1                                |
| maker-11-augustus-gene-194.38-mRNA-1 | Japonica | Indica   |               | Os11g0581700 | OsR498G1120410300.01.T01 | CHALLAH-LIKE 2, EPIDERMAL PATTERNING FACTOR-LIKE protein 4                 |
| maker-11-augustus-gene-194.40-mRNA-1 | Japonica | NA       |               |              | OsR498G1120405800.01.T01 | XS domain containing protein expressed                                     |
| maker-11-augustus-gene-194.42-mRNA-1 | Japonica | NA       |               | Os11g0579900 | OsR498G1120406200.01.T01 | Pumilio domain-containing protein                                          |
| maker-11-augustus-gene-194.44-mRNA-1 | Japonica | NA       |               | Os11g0580100 |                          | SERPIN domain-containing protein                                           |
| maker-11-augustus-gene-194.46-mRNA-1 | Japonica | Indica   |               | Os11g0545000 | OsR498G1120407000.01.T01 | NOP5NT domain-containing protein                                           |
| maker-11-augustus-gene-194.48-mRNA-1 | Japonica | NA       |               | Os11g0580800 | OsR498G1120407400.01.T01 | High chlorophyll fluorescence106c                                          |
| maker-11-augustus-gene-195.0-mRNA-1  | Japonica | NA       |               | Os11g0581900 | OsR498G1120411100.01.T01 | Transmembrane BAX inhibitor motif-containing protein 4                     |
| maker-11-augustus-gene-195.10-mRNA-1 | Japonica | NA       |               |              | OsR498G1120412700.01.T03 | F-box domain-containing protein                                            |
| maker-11-augustus-gene-195.12-mRNA-1 | Japonica | NA       |               | Os11g0583200 | OsR498G1120413700.01.T03 | Pentatricopeptide repeat                                                   |
| maker-11-augustus-gene-195.16-mRNA-1 | Japonica | NA       |               |              | OsR498G1120411400.01.T01 | EGF-like domain-containing protein                                         |
| maker-11-augustus-gene-195.2-mRNA-1  | Japonica | NA       | NBS-TM        | Os11g0582300 | OsR498G1120411700.01.T01 | Protein ROOT HAIR DEFECTIVE 3 homolog                                      |
| maker-11-augustus-gene-195.20-mRNA-1 | Japonica | NA       |               | Os11g0582100 | OsR498G1120411600.01.T01 | E3 ubiquitin-protein ligase RING1                                          |
| maker-11-augustus-gene-195.22-mRNA-1 | Japonica | NA       |               |              | OsR498G1120413600.01.T01 | AAI domain-containing protein (Fragment)                                   |
| maker-11-augustus-gene-195.8-mRNA-1  | Japonica | NA       |               | Os11g0582500 | OsR498G1120412300.01.T01 | AAI domain-containing protein                                              |
| maker-11-augustus-gene-196.36-mRNA-1 | Japonica | NA       |               |              | OsR498G1120416500.01.T03 | PHD finger protein rhinoceros-like                                         |
| maker-11-augustus-gene-196.39-mRNA-1 | Japonica | NA       |               |              |                          | Ribosomal protein L4/L1 family isoform 1                                   |
| maker-11-augustus-gene-196.42-mRNA-1 | Japonica | NA       |               | Os11g0585900 | OsR498G1120418500.01.T02 | Tetratricopeptide TPR-1                                                    |
| maker-11-augustus-gene-197.35-mRNA-1 | Japonica | NA       |               |              |                          | Protein-serine/threonine phosphatase                                       |
| maker-11-augustus-gene-197.44-mRNA-1 | Japonica | NA       |               |              | OsR498G1120421500.01.T01 | Beta-carotene isomerase D27 chloroplastic                                  |
| maker-11-augustus-gene-197.46-mRNA-1 | Japonica | NA       |               |              | OsR498G1120419600.01.T01 | Calmodulin like 5                                                          |
| maker-11-augustus-gene-197.48-mRNA-1 | Japonica | Indica   |               | Os11g0586300 | OsR498G1120419800.01.T02 | Protein RNA-directed DNA methylation like                                  |
| maker-11-augustus-gene-197.50-mRNA-1 | Japonica | NA       |               |              |                          |                                                                            |
| maker-11-augustus-gene-198.0-mRNA-1  | Japonica | Indica   |               | Os07g0485500 | OsR498G1120426500.01.T01 |                                                                            |
| maker-11-augustus-gene-198.10-mRNA-1 | Japonica | Indica   |               | Os07g0525400 | OsR498G1120424800.01.T01 | Rab-GAP TBC domain-containing protein                                      |
| maker-11-augustus-gene-198.15-mRNA-1 | Japonica | NA       |               |              | OsR498G1120425000.01.T01 | Pleiotropic drug resistance protein 5                                      |



|                                      |          |          |               |              |                          |                                                                            |
|--------------------------------------|----------|----------|---------------|--------------|--------------------------|----------------------------------------------------------------------------|
| maker-11-augustus-gene-198.2-mRNA-1  | Japonica | NA       |               | Os11g0588300 | OsR498G1120426900.01.T01 | Theta class glutathione S-transferase                                      |
| maker-11-augustus-gene-198.7-mRNA-1  | Japonica | NA       |               | Os11g0588300 | OsR498G1120426900.01.T01 | Glutathione S-transferase, N-terminal domain containing protein, expressed |
| maker-11-augustus-gene-199.32-mRNA-1 | Japonica | Japonica | NBS-TM        | Os11g0590400 | OsR498G1120429100.01.T01 | Putative CC-NBS-LRR resistance protein MLA13                               |
| maker-11-augustus-gene-199.35-mRNA-1 | Japonica | Japonica | CC-NBS-TM     | Os11g0590700 | OsR498G1120430700.01.T02 | Putative CC-NBS-LRR resistance protein MLA13                               |
| maker-11-augustus-gene-199.37-mRNA-1 | Japonica | NA       | CC-NBS-TM     | Os11g0590900 | OsR498G1120430300.01.T01 | NB-ARC domain containing protein, expressed                                |
| maker-11-augustus-gene-199.40-mRNA-1 | Japonica | Indica   | CC-LRR-NBS-TM | Os11g0590900 | OsR498G1120430700.01.T02 | Putative CC-NBS-LRR resistance protein MLA13                               |
| maker-11-augustus-gene-2.0-mRNA-1    | Japonica | NA       |               | Os12g0119000 | OsR498G1220832200.01.T01 | Secologanin synthase                                                       |
| maker-11-augustus-gene-2.11-mRNA-1   | Japonica | NA       |               | Os11g0120700 | OsR498G1119336000.01.T01 | Putative tubby C-terminal-like domain-containing protein                   |
| maker-11-augustus-gene-2.14-mRNA-1   | Japonica | NA       |               | Os12g0120500 | OsR498G1119336800.01.T03 |                                                                            |
| maker-11-augustus-gene-2.17-mRNA-1   | Japonica | NA       |               | Os11g0121300 | OsR498G1119338600.01.T02 | Protein kinase APK1B chloroplast                                           |
| maker-11-augustus-gene-2.19-mRNA-1   | Japonica | NA       | Kinase        | Os11g0121400 | OsR498G1119338800.01.T01 | Serine/threonine-protein kinase NAK                                        |
| maker-11-augustus-gene-2.2-mRNA-1    | Japonica | Indica   |               | Os12g0119700 | OsR498G1119333300.01.T02 | Retrotransposon protein, putative, Ty1-copia subclass                      |
| maker-11-augustus-gene-2.20-mRNA-1   | Japonica | NA       | Kinase        |              |                          | Putative serine/threonine-protein kinase PBL8                              |
| maker-11-augustus-gene-2.4-mRNA-1    | Japonica | Indica   |               | Os11g0120600 | OsR498G1119335700.01.T01 | Bis(5'-adenosyl)-triphosphatase                                            |
| maker-11-augustus-gene-2.7-mRNA-1    | Japonica | NA       |               | Os12g0120400 | OsR498G1220828000.01.T02 | Bis(5'-adenosyl)-triphosphatase                                            |
| maker-11-augustus-gene-2.9-mRNA-1    | Japonica | NA       |               | Os11g0120200 | OsR498G1119333800.01.T01 | Serine/arginine repetitive matrix protein                                  |
| maker-11-augustus-gene-20.0-mRNA-1   | Japonica | NA       |               | Os11g0156600 | OsR498G1119445300.01.T01 |                                                                            |
| maker-11-augustus-gene-20.11-mRNA-1  | Japonica | Japonica |               | Os11g0157000 | OsR498G1119447400.01.T01 | 5'-3' exoribonuclease                                                      |
| maker-11-augustus-gene-20.13-mRNA-1  | Japonica | Indica   |               | Os11g0157000 | OsR498G1119448000.01.T01 | 5'-3' exoribonuclease                                                      |
| maker-11-augustus-gene-20.15-mRNA-1  | Japonica | NA       |               |              | OsR498G1119448400.01.T01 | 5'-3' exoribonuclease                                                      |
| maker-11-augustus-gene-20.17-mRNA-1  | Japonica | NA       |               | Os11g0157400 | OsR498G1119450600.01.T03 |                                                                            |
| maker-11-augustus-gene-20.3-mRNA-1   | Japonica | Indica   |               | Os11g0156800 | OsR498G1119446100.01.T01 | Butenolide signaling repressing protein-like                               |
| maker-11-augustus-gene-20.5-mRNA-1   | Japonica | NA       |               |              | OsR498G1119448900.01.T01 | Cyclin-T1-5 like                                                           |
| maker-11-augustus-gene-200.10-mRNA-1 | Japonica | NA       | NBS-TM        |              |                          | Protein-serine/threonine phosphatase                                       |
| maker-11-augustus-gene-200.12-mRNA-1 | Japonica | NA       |               | Os11g0592500 |                          | PPM-type phosphatase domain-containing protein                             |
| maker-11-augustus-gene-200.14-mRNA-1 | Japonica | NA       |               | Os11g0592600 | OsR498G1120436500.01.T01 | TPX2 domain-containing protein                                             |
| maker-11-augustus-gene-200.16-mRNA-1 | Japonica | NA       |               |              | OsR498G1120436900.01.T01 | Hflx-type G domain-containing protein                                      |
| maker-11-augustus-gene-200.19-mRNA-1 | Japonica | NA       |               | Os11g0591100 | OsR498G1120431000.01.T02 | GDP-mannose 3,5-epimerase 1                                                |
| maker-11-augustus-gene-200.2-mRNA-1  | Japonica | NA       |               | Os11g0591800 | OsR498G1120433700.01.T01 | Barwin domain-containing protein (Fragment)                                |
| maker-11-augustus-gene-200.24-mRNA-1 | Japonica | Indica   |               | Os11g0591200 | OsR498G1120432000.01.T01 | Very-long-chain 3-oxoacyl-CoA synthase                                     |
| maker-11-augustus-gene-200.26-mRNA-1 | Japonica | NA       |               |              |                          |                                                                            |
| maker-11-augustus-gene-200.28-mRNA-1 | Japonica | NA       |               | Os11g0592300 | OsR498G1120434800.01.T05 | Hexosyltransferase                                                         |
| maker-11-augustus-gene-200.31-mRNA-1 | Japonica | NA       |               |              | OsR498G1120435200.01.T01 | CRM-domain containing factor CFM3, chloroplastic/mitochondrial             |
| maker-11-augustus-gene-200.4-mRNA-1  | Japonica | NA       |               | Os11g0592000 | OsR498G1120433900.01.T01 | Barwin domain-containing protein                                           |
| maker-11-augustus-gene-200.6-mRNA-1  | Japonica | NA       |               | Os11g0592100 | OsR498G1120434100.01.T01 | Barwin domain-containing protein                                           |
| maker-11-augustus-gene-201.0-mRNA-1  | Japonica | Indica   |               | Os06g0141000 | OsR498G1120440500.01.T01 | MFS domain-containing protein (Fragment)                                   |
| maker-11-augustus-gene-201.10-mRNA-1 | Japonica | NA       |               | Os11g0595200 | OsR498G1120445500.01.T02 | Harpin binding protein 1                                                   |
| maker-11-augustus-gene-201.12-mRNA-1 | Japonica | NA       |               | Os11g0592800 | OsR498G1120437200.01.T01 | TRAM domain                                                                |
| maker-11-augustus-gene-201.14-mRNA-1 | Japonica | Indica   |               | Os11g0593000 | OsR498G1120437800.01.T01 | Non-hemolytic phospholipase C                                              |
| maker-11-augustus-gene-201.16-mRNA-1 | Japonica | NA       |               |              | OsR498G1120440400.01.T02 | DUF629 domain-containing protein                                           |
| maker-11-augustus-gene-201.17-mRNA-1 | Japonica | NA       |               |              | OsR498G1120442000.01.T01 | DUF295 domain-containing protein                                           |
| maker-11-augustus-gene-201.2-mRNA-1  | Japonica | NA       |               | Os11g0594200 | OsR498G1120441100.01.T01 | Notchless protein like                                                     |
| maker-11-augustus-gene-201.30-mRNA-1 | Japonica | NA       |               | Os11g0595100 | OsR498G1120445400.01.T01 | DUF295 domain-containing protein                                           |
| maker-11-augustus-gene-202.0-mRNA-1  | Japonica | NA       |               |              |                          | DUF629 domain-containing protein                                           |
| maker-11-augustus-gene-202.1-mRNA-1  | Japonica | NA       |               |              |                          | DUF629 domain-containing protein                                           |
| maker-11-augustus-gene-202.8-mRNA-1  | Japonica | Japonica |               | Os11g0596400 | OsR498G1120452900.01.T05 | rRNA N-glycosidase                                                         |
| maker-11-augustus-gene-203.30-mRNA-1 | Japonica | Japonica |               | Os11g0597700 | OsR498G1120452300.01.T01 | Disease resistance protein RPM1                                            |
| maker-11-augustus-gene-203.32-mRNA-1 | Japonica | NA       |               | Os11g0597500 |                          |                                                                            |
| maker-11-augustus-gene-203.34-mRNA-1 | Japonica | NA       |               | Os11g0579600 | OsR498G1120448000.01.T01 | F-box only protein 7                                                       |
| maker-11-augustus-gene-204.0-mRNA-1  | Japonica | NA       |               | Os11g0598800 | OsR498G1120452900.01.T01 | rRNA N-glycosidase                                                         |
| maker-11-augustus-gene-204.19-mRNA-1 | Japonica | NA       |               |              |                          | DUF629 domain-containing protein                                           |
| maker-11-augustus-gene-204.24-mRNA-1 | Japonica | Indica   |               | Os11g0599101 | OsR498G1120454300.01.T02 | DUF629 domain-containing protein                                           |
| maker-11-augustus-gene-204.28-mRNA-1 | Japonica | NA       |               | Os11g0599500 | OsR498G1120456100.01.T01 | Dead box ATP-dependent RNA helicase, putative isoform 1                    |
| maker-11-augustus-gene-204.30-mRNA-1 | Japonica | NA       |               |              | OsR498G0612819100.01.T01 | L10-interacting MYB domain-containing protein                              |
| maker-11-augustus-gene-204.6-mRNA-1  | Japonica | NA       |               | Os11g0598900 |                          | DUF629 domain-containing protein                                           |
| maker-11-augustus-gene-206.35-mRNA-1 | Japonica | NA       |               |              | OsR498G1120466700.01.T03 |                                                                            |
| maker-11-augustus-gene-206.38-mRNA-1 | Japonica | NA       |               |              |                          | RING-CH-type domain-containing protein                                     |
| maker-11-augustus-gene-206.49-mRNA-1 | Japonica | Indica   |               | Os01g0127900 | OsR498G1120467700.01.T01 | Mannose-6-phosphate isomerase                                              |
| maker-11-augustus-gene-206.57-mRNA-1 | Japonica | NA       |               | Os11g0601700 | OsR498G1120471000.01.T01 | Transcription factor bHLH47                                                |
| maker-11-augustus-gene-207.0-mRNA-1  | Japonica | NA       |               | Os11g0602300 | OsR498G1120474100.01.T02 | tRNA-intron lyase                                                          |
| maker-11-augustus-gene-207.11-mRNA-1 | Japonica | NA       |               | Os11g0603000 | OsR498G1120477300.01.T01 | BHLH domain-containing protein                                             |

|                                      |          |          |               |              |                          |                                                                          |
|--------------------------------------|----------|----------|---------------|--------------|--------------------------|--------------------------------------------------------------------------|
| maker-11-augustus-gene-207.13-mRNA-1 | Japonica | NA       |               | Os11g0603200 | OsR498G1120478100.01.T02 | ABC transporter family protein, expressed                                |
| maker-11-augustus-gene-207.18-mRNA-1 | Japonica | NA       |               | Os11g0603100 | OsR498G1120477800.01.T01 | Elongation factor 1-delta 1-like                                         |
| maker-11-augustus-gene-207.5-mRNA-1  | Japonica | NA       |               | Os11g0602600 | OsR498G1120475100.01.T01 | 30S ribosomal protein S4, chloroplastic                                  |
| maker-11-augustus-gene-208.0-mRNA-1  | Japonica | NA       |               | Os11g0604600 | OsR498G1120482500.01.T01 | RING-CH-type domain-containing protein (Fragment)                        |
| maker-11-augustus-gene-208.11-mRNA-1 | Japonica | NA       |               |              | OsR498G1120483200.01.T02 | Acyl-coenzyme A oxidase                                                  |
| maker-11-augustus-gene-208.5-mRNA-1  | Japonica | NA       |               |              |                          | Thioredoxin domain-containing protein 9 like                             |
| maker-11-augustus-gene-209.1-mRNA-1  | Japonica | NA       | NBS-TM        | Os11g0606900 | OsR498G1120485700.01.T01 | Disease resistance protein RPM1                                          |
| maker-11-augustus-gene-209.14-mRNA-1 | Japonica | NA       | Kinase-LRR-TM | Os11g0607200 | OsR498G1120487000.01.T01 | BRASSINOSTEROID INSENSITIVE 1-associated receptor kinase 1               |
| maker-11-augustus-gene-209.8-mRNA-1  | Japonica | Japonica | LRR-NBS-TM    | Os11g0606400 | OsR498G1120484800.01.T01 | NB-ARC domain containing protein, expressed                              |
| maker-11-augustus-gene-209.9-mRNA-1  | Japonica | Indica   | LRR-NBS-TM    | Os11g0606400 | OsR498G1120485600.01.T01 | NB-ARC domain containing protein, expressed                              |
| maker-11-augustus-gene-21.37-mRNA-1  | Japonica | NA       |               | Os11g0157600 | OsR498G1119451500.01.T01 | Two-component response regulator-like APRR9                              |
| maker-11-augustus-gene-21.43-mRNA-1  | Japonica | NA       |               | Os11g0158200 | OsR498G1119453100.01.T01 | Apoptosis-inducing factor B                                              |
| maker-11-augustus-gene-21.45-mRNA-1  | Japonica | NA       |               | Os11g0158400 | OsR498G1119453700.01.T02 | Digalactosyldiacylglycerol synthase                                      |
| maker-11-augustus-gene-21.54-mRNA-1  | Japonica | NA       |               |              | OsR498G1119452200.01.T01 |                                                                          |
| maker-11-augustus-gene-210.24-mRNA-1 | Japonica | NA       |               |              | OsR498G1120489000.01.T02 | 14-3-3 protein zeta (inferred by orthology to a D. melanogaster protein) |
| maker-11-augustus-gene-211.54-mRNA-1 | Japonica | NA       |               | Os11g0610900 | OsR498G1120491500.01.T01 | Seryl-tRNA synthetase                                                    |
| maker-11-augustus-gene-211.55-mRNA-1 | Japonica | NA       |               | Os11g0610900 | OsR498G1120491500.01.T03 | Seryl-tRNA synthetase                                                    |
| maker-11-augustus-gene-211.69-mRNA-1 | Japonica | NA       |               | Os11g0610700 | OsR498G1120491200.01.T01 | Putative Prolactin regulatory element-binding protein                    |
| maker-11-augustus-gene-213.27-mRNA-1 | Japonica | NA       |               | Os11g0613800 |                          | Transposon protein, putative, CACTA, En/Spm sub-class                    |
| maker-11-augustus-gene-214.40-mRNA-1 | Japonica | NA       |               | Os11g0614400 | OsR498G1120503300.01.T01 | Patatin                                                                  |
| maker-11-augustus-gene-214.42-mRNA-1 | Japonica | NA       |               | Os11g0614800 | OsR498G1120504700.01.T01 | Cyclin-dependent kinase inhibitor                                        |
| maker-11-augustus-gene-214.45-mRNA-1 | Japonica | Indica   |               | Os11g0614900 | OsR498G1120505100.01.T05 | Transmembrane protein like                                               |
| maker-11-augustus-gene-214.50-mRNA-1 | Japonica | NA       |               |              | OsR498G1120505900.01.T02 | Phosphatidate phosphatase                                                |
| maker-11-augustus-gene-214.55-mRNA-1 | Japonica | NA       |               | Os11g0615100 | OsR498G1120506100.01.T01 | Phosphatidate phosphatase                                                |
| maker-11-augustus-gene-214.58-mRNA-1 | Japonica | NA       |               | Os11g0615800 | OsR498G1120508900.01.T01 | DNA repair protein RAD51 homolog                                         |
| maker-11-augustus-gene-214.60-mRNA-1 | Japonica | NA       |               |              | OsR498G1120509500.01.T01 | NB-ARC domain-containing protein                                         |
| maker-11-augustus-gene-214.62-mRNA-1 | Japonica | NA       |               | Os11g0615200 | OsR498G1120506400.01.T01 | GRF1-interacting factor 3 isoform A                                      |
| maker-11-augustus-gene-214.64-mRNA-1 | Japonica | NA       |               | Os11g0615700 | OsR498G1120508800.01.T01 | Proteasome endopeptidase complex                                         |
| maker-11-augustus-gene-214.70-mRNA-1 | Japonica | NA       |               |              | OsR498G1120509800.01.T01 |                                                                          |
| maker-11-augustus-gene-215.0-mRNA-1  | Japonica | NA       | Kinase-TM     | Os11g0616100 | OsR498G1120510900.01.T01 | Leucine-rich repeat receptor protein kinase EXS                          |
| maker-11-augustus-gene-215.5-mRNA-1  | Japonica | NA       |               | Os11g0616300 | OsR498G1120512200.01.T01 | Remorin, C-terminal                                                      |
| maker-11-augustus-gene-215.8-mRNA-1  | Japonica | NA       |               |              | OsR498G1120513600.01.T01 |                                                                          |
| maker-11-augustus-gene-216.34-mRNA-1 | Japonica | NA       | Kinase-TM     |              | OsR498G1120517600.01.T01 | Protein kinase domain-containing protein                                 |
| maker-11-augustus-gene-216.36-mRNA-1 | Japonica | NA       | Kinase-TM     |              | OsR498G1120517800.01.T01 | Protein kinase domain containing protein, expressed                      |
| maker-11-augustus-gene-216.38-mRNA-1 | Japonica | Indica   |               | Os11g0618600 | OsR498G1120518800.01.T01 | Protein kinase domain-containing protein (Fragment)                      |
| maker-11-augustus-gene-216.43-mRNA-1 | Japonica | NA       |               |              |                          | USP domain-containing protein                                            |
| maker-11-augustus-gene-216.45-mRNA-1 | Japonica | NA       |               |              | OsR498G1120520600.01.T01 | USP domain-containing protein                                            |
| maker-11-augustus-gene-217.42-mRNA-1 | Japonica | NA       | Kinase-LRR-TM | Os11g0620500 | OsR498G1120524900.01.T01 | Leucine-rich repeat receptor protein kinase EXS, putative                |
| maker-11-augustus-gene-217.44-mRNA-1 | Japonica | Indica   |               | Os11g0620000 | OsR498G1120523200.01.T03 | Mitochondrial inner membrane protease                                    |
| maker-11-augustus-gene-217.48-mRNA-1 | Japonica | NA       |               | Os11g0620100 | OsR498G1120523800.01.T02 | oligouridylylate-binding protein 1-like isoform X1                       |
| maker-11-augustus-gene-217.55-mRNA-1 | Japonica | NA       |               |              | OsR498G1120526000.01.T01 | Polyubiquitin                                                            |
| maker-11-augustus-gene-217.57-mRNA-1 | Japonica | Japonica |               | Os11g0621400 | OsR498G1120526200.01.T02 |                                                                          |
| maker-11-augustus-gene-218.23-mRNA-1 | Japonica | Japonica |               | Os11g0622150 | OsR498G1120530800.01.T01 | BTB/POZ domain containing protein, expressed                             |
| maker-11-augustus-gene-219.36-mRNA-1 | Japonica | NA       |               |              | OsR498G1120544700.01.T01 |                                                                          |
| maker-11-augustus-gene-22.27-mRNA-1  | Japonica | NA       |               | Os11g0159500 |                          | Large tegument protein                                                   |
| maker-11-augustus-gene-22.29-mRNA-1  | Japonica | NA       |               | Os11g0160000 | OsR498G1119460300.01.T01 |                                                                          |
| maker-11-augustus-gene-22.35-mRNA-1  | Japonica | Indica   |               | Os11g0160100 | OsR498G1119461400.01.T01 | PHD-finger family protein, expressed                                     |
| maker-11-augustus-gene-22.37-mRNA-1  | Japonica | NA       | CC-Kinase-TM  | Os11g0160300 | OsR498G1119462200.01.T01 | Probable serine/threonine-protein kinase WNK6                            |
| maker-11-augustus-gene-22.40-mRNA-1  | Japonica | NA       |               | Os11g0160700 | OsR498G1119464000.01.T02 | PHD domain-containing protein                                            |
| maker-11-augustus-gene-220.21-mRNA-1 | Japonica | NA       |               | Os07g0651500 |                          | ATP-dependent DNA helicase                                               |
| maker-11-augustus-gene-220.23-mRNA-1 | Japonica | Japonica | Kinase-LRR-TM | Os11g0625900 | OsR498G1120550600.01.T01 | Putative LRR receptor-like serine/threonine-protein kinase               |
| maker-11-augustus-gene-221.0-mRNA-1  | Japonica | Japonica | Kinase-LRR-TM | Os11g0628000 | OsR498G1120550600.01.T01 | Putative LRR receptor-like serine/threonine-protein kinase               |
| maker-11-augustus-gene-221.12-mRNA-1 | Japonica | NA       |               | Os11g0629300 | OsR498G1120561500.01.T01 | RING-type domain-containing protein                                      |
| maker-11-augustus-gene-221.4-mRNA-1  | Japonica | NA       |               | Os11g0629100 | OsR498G1120561100.01.T02 | Protein PYRICULARIA ORYZAE RESISTANCE 21                                 |
| maker-11-augustus-gene-221.6-mRNA-1  | Japonica | NA       |               | Os11g0629200 | OsR498G1120561300.01.T01 | Vacuolar protein sorting-associated protein 26                           |
| maker-11-augustus-gene-222.39-mRNA-1 | Japonica | NA       | CC-NBS-TM     |              | OsR498G1120562500.01.T05 | Disease resistance protein RPM1                                          |
| maker-11-augustus-gene-222.42-mRNA-1 | Japonica | NA       | NBS-TM        |              | OsR498G1120563300.01.T01 | NB-ARC domain containing protein, expressed                              |
| maker-11-augustus-gene-222.45-mRNA-1 | Japonica | NA       |               | Os11g0629600 |                          | BTB/POZ and MATH domain-containing protein 2                             |
| maker-11-augustus-gene-222.46-mRNA-1 | Japonica | NA       |               | Os11g0629400 | OsR498G1120562000.01.T01 | Methylesterase 11                                                        |
| maker-11-augustus-gene-222.48-mRNA-1 | Japonica | NA       |               | Os11g0629500 | OsR498G1120562200.01.T03 | O-phosphoserine phosphohydrolase                                         |
| maker-11-augustus-gene-223.0-mRNA-1  | Japonica | NA       |               |              | OsR498G1120575900.01.T01 |                                                                          |

|                                      |          |          |            |              |                          |                                                                          |
|--------------------------------------|----------|----------|------------|--------------|--------------------------|--------------------------------------------------------------------------|
| maker-11-augustus-gene-223.2-mRNA-1  | Japonica | Indica   |            | Os02g0701833 | OsR498G1120576600.01.T02 | ATP-dependent DNA helicase                                               |
| maker-11-augustus-gene-224.0-mRNA-1  | Japonica | NA       | LRR-NBS-TM | Os11g0633500 | OsR498G1120581500.01.T03 | Disease resistance protein RPP8                                          |
| maker-11-augustus-gene-224.3-mRNA-1  | Japonica | NA       |            | Os11g0633800 | OsR498G1120584100.01.T01 | F-box domain containing protein, expressed                               |
| maker-11-augustus-gene-224.5-mRNA-1  | Japonica | NA       |            | Os11g0634200 | OsR498G1120584800.01.T01 |                                                                          |
| maker-11-augustus-gene-225.0-mRNA-1  | Japonica | Indica   |            | Os11g0634500 | OsR498G1120587100.01.T02 | Ribosomal protein S14p/S29e containing protein, expressed                |
| maker-11-augustus-gene-225.2-mRNA-1  | Japonica | NA       |            |              | OsR498G1120587900.01.T01 | BHLH domain-containing protein (Fragment)                                |
| maker-11-augustus-gene-225.3-mRNA-1  | Japonica | Indica   | NBS-TM     | Os07g0573100 | OsR498G1120588100.01.T01 | Adenylyl-sulfate kinase                                                  |
| maker-11-augustus-gene-225.6-mRNA-1  | Japonica | Indica   |            | Os11g0635500 | OsR498G1120590900.01.T01 | Ent-cassadiene C2-hydroxylase                                            |
| maker-11-augustus-gene-225.8-mRNA-1  | Japonica | NA       |            | Os11g0635500 | OsR498G1120591500.01.T01 | Ent-cassadiene C2-hydroxylase-like                                       |
| maker-11-augustus-gene-226.0-mRNA-1  | Japonica | NA       |            | Os09g0244000 |                          |                                                                          |
| maker-11-augustus-gene-226.2-mRNA-1  | Japonica | Japonica |            | Os11g0636200 | OsR498G1120596000.01.T03 | CPSF (Cleavage and polyadenylation specific factor), subunit A, putative |
| maker-11-augustus-gene-226.7-mRNA-1  | Japonica | NA       |            | Os11g0636900 | OsR498G1120601800.01.T01 | U2 snRNP auxiliary factor large subunit                                  |
| maker-11-augustus-gene-227.36-mRNA-1 | Japonica | Japonica |            | Os11g0637300 | OsR498G1120603300.01.T01 | F-box domain containing protein, expressed                               |
| maker-11-augustus-gene-227.38-mRNA-1 | Japonica | NA       |            | Os11g0637700 | OsR498G1120604700.01.T02 | Heterogeneous nuclear ribonucleoprotein 1                                |
| maker-11-augustus-gene-227.40-mRNA-1 | Japonica | NA       |            |              | OsR498G1120605300.01.T06 | GTP-binding protein EngA                                                 |
| maker-11-augustus-gene-227.45-mRNA-1 | Japonica | NA       |            | Os11g0638200 |                          |                                                                          |
| maker-11-augustus-gene-227.48-mRNA-1 | Japonica | Indica   |            | Os11g0637200 | OsR498G1120602400.01.T01 | Polyol transporter 5                                                     |
| maker-11-augustus-gene-227.53-mRNA-1 | Japonica | Indica   |            | Os11g0637200 | OsR498G1120604000.01.T02 | Polyol transporter 5                                                     |
| maker-11-augustus-gene-227.55-mRNA-1 | Japonica | Indica   |            | Os11g0637400 | OsR498G1120604200.01.T01 | Stress-associated endoplasmic reticulum protein 2                        |
| maker-11-augustus-gene-227.57-mRNA-1 | Japonica | NA       |            |              | OsR498G1120604600.01.T01 | Potyviral VPg interacting protein 1 (Fragment)                           |
| maker-11-augustus-gene-227.59-mRNA-1 | Japonica | NA       |            |              | OsR498G1120605000.01.T01 | 1-acylglycerol-3-phosphate O-acyltransferase                             |
| maker-11-augustus-gene-227.63-mRNA-1 | Japonica | NA       |            |              | OsR498G1120608000.01.T03 | Armado repeat-containing protein 8                                       |
| maker-11-augustus-gene-228.0-mRNA-1  | Japonica | NA       |            |              | OsR498G1120608700.01.T01 | Folate-sensitive fragile site protein Fra10Ac1                           |
| maker-11-augustus-gene-228.6-mRNA-1  | Japonica | NA       | CC-LRR-NBS | Os11g0640600 | OsR498G1120613000.01.T01 | Blast resistance protein Pi54 variant (Fragment)                         |
| maker-11-augustus-gene-23.40-mRNA-1  | Japonica | NA       |            | Os11g0161000 | OsR498G1119465100.01.T02 | NB-ARC domain, putative                                                  |
| maker-11-augustus-gene-23.42-mRNA-1  | Japonica | Japonica |            | Os11g0161650 | OsR498G1119465700.01.T05 | NB-ARC domain, putative                                                  |
| maker-11-augustus-gene-23.45-mRNA-1  | Japonica | NA       |            |              | OsR498G1119465700.01.T04 | NB-ARC domain, putative                                                  |
| maker-11-augustus-gene-23.48-mRNA-1  | Japonica | NA       |            | Os11g0162200 | OsR498G1119466700.01.T01 | Cytochrome b-c1 complex subunit 6-1, mitochondrial                       |
| maker-11-augustus-gene-23.54-mRNA-1  | Japonica | NA       |            |              | OsR498G0100693500.01.T01 | Transposon protein, putative, Mutator sub-class                          |
| maker-11-augustus-gene-23.57-mRNA-1  | Japonica | NA       |            |              | OsR498G1119466400.01.T01 | ATG13 domain-containing protein                                          |
| maker-11-augustus-gene-23.60-mRNA-1  | Japonica | NA       |            | Os11g0162300 |                          |                                                                          |
| maker-11-augustus-gene-231.0-mRNA-1  | Japonica | NA       |            |              | OsR498G1120633100.01.T01 | Oxidoreductase, aldo/keto reductase family protein, expressed            |
| maker-11-augustus-gene-231.11-mRNA-1 | Japonica | NA       |            |              | OsR498G1120632000.01.T02 | Nicotianamine aminotransferase A                                         |
| maker-11-augustus-gene-231.7-mRNA-1  | Japonica | Japonica |            | Os11g0645700 | OsR498G1120634500.01.T01 |                                                                          |
| maker-11-augustus-gene-233.24-mRNA-1 | Japonica | NA       |            |              | OsR498G1120642100.01.T01 |                                                                          |
| maker-11-augustus-gene-233.29-mRNA-1 | Japonica | NA       |            | Os11g0648000 | OsR498G1120635000.01.T01 | Sodium-hydrogen exchanger 2                                              |
| maker-11-augustus-gene-233.32-mRNA-1 | Japonica | NA       |            |              | OsR498G1120635400.01.T03 | kinesin-like protein klp-3 isoform X2                                    |
| maker-11-augustus-gene-233.38-mRNA-1 | Japonica | Indica   |            | Os11g0648400 | OsR498G1120641000.01.T02 |                                                                          |
| maker-11-augustus-gene-233.45-mRNA-1 | Japonica | NA       |            |              | OsR498G1120641400.01.T01 |                                                                          |
| maker-11-augustus-gene-233.47-mRNA-1 | Japonica | NA       |            |              | OsR498G1120642600.01.T01 |                                                                          |
| maker-11-augustus-gene-233.51-mRNA-1 | Japonica | NA       |            |              |                          |                                                                          |
| maker-11-augustus-gene-234.0-mRNA-1  | Japonica | NA       |            |              | OsR498G1120643700.01.T01 |                                                                          |
| maker-11-augustus-gene-234.11-mRNA-1 | Japonica | NA       |            | Os11g0649600 | OsR498G1120646000.01.T01 |                                                                          |
| maker-11-augustus-gene-234.13-mRNA-1 | Japonica | NA       |            | Os11g0649700 | OsR498G1120646200.01.T01 |                                                                          |
| maker-11-augustus-gene-234.2-mRNA-1  | Japonica | NA       |            |              | OsR498G1120650900.01.T01 | von Willebrand factor type A domain containing protein, expressed        |
| maker-11-augustus-gene-234.4-mRNA-1  | Japonica | NA       |            |              | OsR498G1120644200.01.T01 |                                                                          |
| maker-11-augustus-gene-234.9-mRNA-1  | Japonica | NA       |            |              | OsR498G1120645000.01.T01 |                                                                          |
| maker-11-augustus-gene-236.36-mRNA-1 | Japonica | Indica   |            | Os11g0652600 | OsR498G1120655200.01.T01 | DUF4220 domain-containing protein (Fragment)                             |
| maker-11-augustus-gene-236.39-mRNA-1 | Japonica | NA       |            | Os11g0652900 | OsR498G1120655800.01.T02 | Tropinone reductase                                                      |
| maker-11-augustus-gene-237.33-mRNA-1 | Japonica | Japonica |            | Os11g0655000 | OsR498G1120661900.01.T01 |                                                                          |
| maker-11-augustus-gene-237.37-mRNA-1 | Japonica | NA       |            | Os11g0654400 | OsR498G1120665000.01.T01 | Tropinone reductase                                                      |
| maker-11-augustus-gene-238.30-mRNA-1 | Japonica | NA       |            | Os11g0655800 | OsR498G1120669300.01.T05 | probable feruloyl esterase A                                             |
| maker-11-augustus-gene-238.37-mRNA-1 | Japonica | Indica   |            | Os11g0657000 | OsR498G1120670900.01.T02 | Kelch motif family protein, expressed                                    |
| maker-11-augustus-gene-238.40-mRNA-1 | Japonica | NA       |            | Os11g0657100 | OsR498G1120671100.01.T01 | RF-1 domain-containing protein/PCRF domain-containing protein            |
| maker-11-augustus-gene-238.46-mRNA-1 | Japonica | NA       |            | Os11g0657300 | OsR498G1120671500.01.T02 | Sm protein F                                                             |
| maker-11-augustus-gene-238.50-mRNA-1 | Japonica | NA       |            | Os11g0657200 | OsR498G1120671400.01.T01 | alkylated DNA repair protein alkB homolog 8                              |
| maker-11-augustus-gene-239.0-mRNA-1  | Japonica | NA       |            | Os11g0658700 | OsR498G1120679700.01.T02 | Agamous-like MADS-box protein AGL65                                      |
| maker-11-augustus-gene-239.13-mRNA-1 | Japonica | NA       |            | Os11g0658800 | OsR498G1120680000.01.T02 | Glycoside hydrolase family 28 protein, putative, expressed               |
| maker-11-augustus-gene-239.3-mRNA-1  | Japonica | NA       |            |              | OsR498G1120681300.01.T01 | Mono-/di-acylglycerol lipase N-terminal                                  |
| maker-11-augustus-gene-24.35-mRNA-1  | Japonica | NA       |            | Os11g0163100 | OsR498G1119468300.01.T04 | Beta-actin                                                               |
| maker-11-augustus-gene-24.40-mRNA-1  | Japonica | Indica   |            | Os11g0163600 | OsR498G1119469900.01.T05 | Tubby-like F-box protein 13                                              |

|                                      |          |          |                  |              |                          |                                                                             |
|--------------------------------------|----------|----------|------------------|--------------|--------------------------|-----------------------------------------------------------------------------|
| maker-11-augustus-gene-24.44-mRNA-1  | Japonica | NA       |                  | Os11g0165700 | OsR498G1119471500.01.T01 | Transposon protein, putative, CACTA, En/Spm sub-class, expressed            |
| maker-11-augustus-gene-240.0-mRNA-1  | Japonica | NA       |                  | Os11g0659200 | OsR498G1120681700.01.T01 | FLZ-type domain-containing protein                                          |
| maker-11-augustus-gene-240.11-mRNA-1 | Japonica | NA       |                  | Os11g0660000 | OsR498G1120683400.01.T02 | Magnesiumproton exchanger                                                   |
| maker-11-augustus-gene-240.18-mRNA-1 | Japonica | NA       |                  | Os11g0660500 | OsR498G1120685800.01.T01 | TCTP domain-containing protein (Fragment)                                   |
| maker-11-augustus-gene-240.2-mRNA-1  | Japonica | NA       |                  | Os11g0660300 | OsR498G1120683700.01.T01 | WD repeat-containing protein 61                                             |
| maker-11-augustus-gene-240.4-mRNA-1  | Japonica | NA       |                  | Os11g0659500 | OsR498G1120682400.01.T03 | Acyl-[acyl-carrier-protein] hydrolase                                       |
| maker-11-augustus-gene-240.8-mRNA-1  | Japonica | NA       |                  |              |                          | Pectinesterase                                                              |
| maker-11-augustus-gene-241.10-mRNA-1 | Japonica | Indica   |                  | Os07g0672500 | OsR498G1120687800.01.T02 | AAA-type ATPase family protein                                              |
| maker-11-augustus-gene-241.18-mRNA-1 | Japonica | NA       |                  | Os11g0661800 |                          |                                                                             |
| maker-11-augustus-gene-241.20-mRNA-1 | Japonica | NA       |                  | Os08g0522100 |                          | ATP-dependent DNA helicase                                                  |
| maker-11-augustus-gene-241.8-mRNA-1  | Japonica | NA       |                  | Os11g0661600 | OsR498G1120688300.01.T01 | Peroxidase                                                                  |
| maker-11-augustus-gene-243.4-mRNA-1  | Japonica | Japonica |                  | Os11g0664800 | OsR498G1120688900.01.T01 | Calmodulin-binding protein 60 F                                             |
| maker-11-augustus-gene-243.6-mRNA-1  | Japonica | Indica   |                  | Os11g0665600 | OsR498G1120688800.01.T01 |                                                                             |
| maker-11-augustus-gene-244.49-mRNA-1 | Japonica | NA       | Kinase-TM        |              | OsR498G1120691300.01.T01 | Cytokinin-regulated kinase-like                                             |
| maker-11-augustus-gene-244.53-mRNA-1 | Japonica | Japonica | CC-Kinase-TM     | Os11g0666200 | OsR498G1120691200.01.T01 | Protein kinase domain-containing protein                                    |
| maker-11-augustus-gene-245.38-mRNA-1 | Japonica | NA       |                  |              | OsR498G1120694900.01.T03 |                                                                             |
| maker-11-augustus-gene-245.39-mRNA-1 | Japonica | NA       |                  |              |                          | Calmodulin-binding protein-like                                             |
| maker-11-augustus-gene-245.48-mRNA-1 | Japonica | NA       | Kinase-TM        |              | OsR498G1120696900.01.T05 | Protein kinase domain containing protein, expressed                         |
| maker-11-augustus-gene-245.50-mRNA-1 | Japonica | NA       |                  | Os11g0669100 | OsR498G1120697100.01.T01 | Calmodulin-binding protein-like                                             |
| maker-11-augustus-gene-245.56-mRNA-1 | Japonica | NA       | Kinase-TM        |              | OsR498G1120696900.01.T05 | G-type lectin 5-receptor-like serine/threonine-protein kinase               |
| maker-11-augustus-gene-245.58-mRNA-1 | Japonica | NA       |                  |              |                          |                                                                             |
| maker-11-augustus-gene-246.7-mRNA-1  | Japonica | Indica   |                  | Os09g0529700 | OsR498G1120699900.01.T01 | Vacuolar protein sorting-associated protein                                 |
| maker-11-augustus-gene-246.8-mRNA-1  | Japonica | NA       |                  | Os09g0529400 | OsR498G0917840000.01.T04 | Vacuolar protein sorting-associated protein                                 |
| maker-11-augustus-gene-247.3-mRNA-1  | Japonica | NA       |                  | Os11g0672300 | OsR498G1120704100.01.T05 | Protein MID1-COMPLEMENTING ACTIVITY 1                                       |
| maker-11-augustus-gene-247.5-mRNA-1  | Japonica | NA       |                  |              | OsR498G1120704400.01.T01 | p-loop nucleoside triphosphate hydrolase superfamily protein with CH (Calp) |
| maker-11-augustus-gene-248.27-mRNA-1 | Japonica | NA       | CC-LRR-NBS-TM    | Os11g0677101 | OsR498G1120709900.01.T01 | Putative nucleotide-binding leucine-rich-repeat protein 1                   |
| maker-11-augustus-gene-248.32-mRNA-1 | Japonica | Japonica | LRR-NBS          | Os11g0673900 | OsR498G1120709100.01.T03 | Putative nucleotide-binding leucine-rich-repeat protein 1                   |
| maker-11-augustus-gene-248.45-mRNA-1 | Japonica | Indica   |                  | Os11g0673200 | OsR498G1120707800.01.T01 | Beta-xylosidase 2                                                           |
| maker-11-augustus-gene-25.37-mRNA-1  | Japonica | NA       |                  | Os11g0166300 |                          | 60 kDa jasmonate-induced protein, putative                                  |
| maker-11-augustus-gene-250.32-mRNA-1 | Japonica | Indica   | CC-Kinase-TM     | Os12g0562500 | OsR498G1120719100.01.T01 | Serine/threonine-protein kinase CTR1                                        |
| maker-11-augustus-gene-250.37-mRNA-1 | Japonica | NA       |                  | Os11g0679700 | OsR498G1120723300.01.T01 | PlsC domain-containing protein (Fragment)                                   |
| maker-11-augustus-gene-250.39-mRNA-1 | Japonica | NA       |                  |              | OsR498G1120721800.01.T01 | VWFA domain-containing protein (Fragment)                                   |
| maker-11-augustus-gene-251.40-mRNA-1 | Japonica | NA       | Kinase-TM        |              | OsR498G1120726800.01.T02 | Receptor protein kinase-like                                                |
| maker-11-augustus-gene-252.38-mRNA-1 | Japonica | NA       |                  | Os11g0682300 | OsR498G1120728700.01.T06 | U2 snRNP auxiliary factor large subunit                                     |
| maker-11-augustus-gene-252.48-mRNA-1 | Japonica | NA       |                  | Os11g0683500 | OsR498G1120729800.01.T02 | Beta-glucosidase 5                                                          |
| maker-11-augustus-gene-252.53-mRNA-1 | Japonica | NA       |                  | Os11g0684000 | OsR498G1120730600.01.T01 | Transcription factor MYB108                                                 |
| maker-11-augustus-gene-252.57-mRNA-1 | Japonica | Japonica | NBS              | Os11g0684600 | OsR498G1120731800.01.T01 | NBS-LRR disease resistance protein homologue-like                           |
| maker-11-augustus-gene-253.1-mRNA-1  | Japonica | Indica   | NBS-TM           | Os11g0684100 | OsR498G1120735400.01.T01 | NBS-LRR disease resistance protein homologue-like                           |
| maker-11-augustus-gene-254.0-mRNA-1  | Japonica | NA       |                  | Os11g0687100 | OsR498G1120737300.01.T01 | von Willebrand factor type A domain-like                                    |
| maker-11-augustus-gene-254.11-mRNA-1 | Japonica | NA       | LRR-NBS-TM       |              | OsR498G1120737800.01.T01 | Disease resistance protein Piks-1                                           |
| maker-11-augustus-gene-254.4-mRNA-1  | Japonica | NA       |                  | Os11g0687100 | OsR498G1120737300.01.T01 | von Willebrand factor type A domain-like                                    |
| maker-11-augustus-gene-254.7-mRNA-1  | Japonica | Indica   |                  | Os11g0687200 | OsR498G1120737500.01.T01 | von Willebrand factor type A domain-like                                    |
| maker-11-augustus-gene-255.0-mRNA-1  | Japonica | Indica   | NBS-TM PIK, PIKM | Os11g0689100 | OsR498G1120737900.01.T02 | Disease resistance protein Piks-2                                           |
| maker-11-augustus-gene-256.34-mRNA-1 | Japonica | NA       | Kinase-TM        | Os11g0695850 | OsR498G1120743300.01.T02 | Wall-associated receptor kinase                                             |
| maker-11-augustus-gene-256.35-mRNA-1 | Japonica | NA       | Kinase-TM        |              |                          | Putative inactive receptor kinase RLK902                                    |
| maker-11-augustus-gene-256.36-mRNA-1 | Japonica | NA       | Kinase           |              |                          | Major disease resistance protein Xa4                                        |
| maker-11-augustus-gene-257.26-mRNA-1 | Japonica | Indica   | Kinase-LRR-TM    | Os11g0695700 | OsR498G1120747200.01.T01 | Putative receptor kinase TRKc                                               |
| maker-11-augustus-gene-257.28-mRNA-1 | Japonica | NA       | Kinase-LRR-TM    |              | OsR498G1120751000.01.T01 | Protein kinase domain containing protein, expressed                         |
| maker-11-augustus-gene-258.22-mRNA-1 | Japonica | NA       | Kinase-LRR-TM    | Os11g0695600 | OsR498G1120747600.01.T01 | Serine-threonine protein kinase plant-type                                  |
| maker-11-augustus-gene-260.0-mRNA-1  | Japonica | Japonica | CC-NBS-TM        | Os11g0699100 | OsR498G1120757300.01.T01 | Disease resistance protein RPP13                                            |
| maker-11-augustus-gene-260.5-mRNA-1  | Japonica | NA       |                  | Os11g0700500 | OsR498G1120760800.01.T01 | MYB transcription factor MYBAS1                                             |
| maker-11-augustus-gene-262.53-mRNA-1 | Japonica | NA       |                  | Os11g0704700 | OsR498G1120770400.01.T02 | RRM domain-containing protein (Fragment)                                    |
| maker-11-augustus-gene-262.58-mRNA-1 | Japonica | NA       |                  | Os11g0704800 | OsR498G1120770600.01.T01 | RHOMBOID-like protein (Fragment)                                            |
| maker-11-augustus-gene-263.0-mRNA-1  | Japonica | NA       |                  |              | OsR498G1120777300.01.T02 | Mitochondrial uncoupling protein 2                                          |
| maker-11-augustus-gene-263.16-mRNA-1 | Japonica | Japonica |                  | Os11g0706100 | OsR498G0203365400.01.T04 |                                                                             |
| maker-11-augustus-gene-263.21-mRNA-1 | Japonica | Indica   |                  | Os11g0706600 | OsR498G1120773800.01.T02 | thaumatin-like protein isoform X2                                           |
| maker-11-augustus-gene-263.23-mRNA-1 | Japonica | NA       |                  |              | OsR498G1120774000.01.T01 | Cyclin N-terminal domain-containing protein                                 |
| maker-11-augustus-gene-263.25-mRNA-1 | Japonica | Indica   |                  | Os11g0707000 | OsR498G1120774600.01.T03 | Ribulose biphosphate carboxylase/oxygenase activase                         |
| maker-11-augustus-gene-263.30-mRNA-1 | Japonica | Japonica |                  | Os11g0707100 | OsR498G1120774600.01.T02 | Rubisco activase small subunit                                              |
| maker-11-augustus-gene-263.32-mRNA-1 | Japonica | NA       |                  | Os11g0707600 | OsR498G1120776600.01.T01 | Aldehyde oxygenase (deformylating)                                          |
| maker-11-augustus-gene-263.37-mRNA-1 | Japonica | NA       |                  | Os11g0707700 | OsR498G1120776800.01.T01 | Elongin-C                                                                   |

|                                      |          |          |               |              |                          |                                                                                  |
|--------------------------------------|----------|----------|---------------|--------------|--------------------------|----------------------------------------------------------------------------------|
| maker-11-augustus-gene-263.39-mRNA-1 | Japonica | Indica   |               | Os11g0708600 | OsR498G1120779000.01.T02 | mediator of RNA polymerase II transcription subunit 34 isoform X1                |
| maker-11-augustus-gene-263.4-mRNA-1  | Japonica | NA       |               |              | OsR498G1120778300.01.T01 | Laccase                                                                          |
| maker-11-augustus-gene-263.6-mRNA-1  | Japonica | NA       |               | Os11g0708400 | OsR498G1120778500.01.T01 | GDSL esterase/lipase                                                             |
| maker-11-augustus-gene-263.9-mRNA-1  | Japonica | Japonica |               | Os11g0708900 | OsR498G0407560600.01.T01 | Phenylalanine ammonia-lyase                                                      |
| maker-11-augustus-gene-27.0-mRNA-1   | Japonica | NA       |               |              | OsR498G1119475100.01.T01 | SEC14 cytosolic factor family protein / phosphoglyceride transfer family protein |
| maker-11-augustus-gene-27.12-mRNA-1  | Japonica | NA       |               | Os11g0168200 | OsR498G1119478900.01.T01 | Ribosomal protein L3                                                             |
| maker-11-augustus-gene-27.16-mRNA-1  | Japonica | Indica   |               | Os11g0166800 | OsR498G1119474600.01.T02 | probable mediator of RNA polymerase II transcription subunit 26c                 |
| maker-11-augustus-gene-27.20-mRNA-1  | Japonica | NA       |               | Os11g0167300 | OsR498G1119475600.01.T01 | HTH OST-type domain-containing protein (Fragment)                                |
| maker-11-augustus-gene-27.22-mRNA-1  | Japonica | NA       |               | Os11g0167800 | OsR498G1119476600.01.T01 | Abcissic acid stress ripening                                                    |
| maker-11-augustus-gene-27.8-mRNA-1   | Japonica | Indica   |               | Os01g0963300 | OsR498G1119478500.01.T02 | t-SNARE coiled-coil homology domain-containing protein                           |
| maker-11-augustus-gene-28.36-mRNA-1  | Japonica | Japonica |               | Os11g0168300 | OsR498G0408582600.01.T02 | Alba domain-containing protein (Fragment)                                        |
| maker-11-augustus-gene-28.37-mRNA-1  | Japonica | NA       |               | Os11g0168300 |                          |                                                                                  |
| maker-11-augustus-gene-28.42-mRNA-1  | Japonica | Indica   | Kinase-TM     | Os02g0194400 | OsR498G1119480300.01.T01 | Leucine-rich repeat receptor protein kinase MSL1                                 |
| maker-11-augustus-gene-28.44-mRNA-1  | Japonica | NA       |               |              |                          | Transposon protein, putative, CACTA, En/Spm sub-class                            |
| maker-11-augustus-gene-28.48-mRNA-1  | Japonica | NA       |               | Os11g0169100 | OsR498G1119481900.01.T01 | Sec1 family domain-containing protein 2                                          |
| maker-11-augustus-gene-28.50-mRNA-1  | Japonica | NA       |               | Os11g0169400 | OsR498G1119483300.01.T01 | Zinc finger, C2H2 type family protein, expressed                                 |
| maker-11-augustus-gene-28.52-mRNA-1  | Japonica | Indica   |               | Os11g0169800 | OsR498G1119484100.01.T01 | Long-chain-fatty-acid--CoA ligase 3                                              |
| maker-11-augustus-gene-28.57-mRNA-1  | Japonica | NA       |               | Os11g0168500 | OsR498G1119479600.01.T01 | Ethylene response factor 9                                                       |
| maker-11-augustus-gene-28.59-mRNA-1  | Japonica | NA       |               | Os11g0169200 | OsR498G1119482600.01.T01 | AUX/LAX auxin transporter                                                        |
| maker-11-augustus-gene-28.61-mRNA-1  | Japonica | NA       |               | Os09g0545700 | OsR498G0815439200.01.T01 | Auxin-responsive protein SAUR36-like                                             |
| maker-11-augustus-gene-28.63-mRNA-1  | Japonica | NA       |               | Os11g0169900 | OsR498G1119484400.01.T01 | V-type proton ATPase proteolipid subunit                                         |
| maker-11-augustus-gene-28.66-mRNA-1  | Japonica | Japonica |               | Os11g0170000 | OsR498G1221019600.01.T03 | Amidase family protein, expressed                                                |
| maker-11-augustus-gene-28.68-mRNA-1  | Japonica | NA       |               | Os11g0170200 | OsR498G1119484800.01.T07 | Filament-like plant protein 3                                                    |
| maker-11-augustus-gene-29.32-mRNA-1  | Japonica | Indica   |               | Os12g0169400 | OsR498G1119485200.01.T02 | CBS domain containing protein CBSCBSPB4                                          |
| maker-11-augustus-gene-29.41-mRNA-1  | Japonica | NA       |               | Os11g0171500 | OsR498G1119487000.01.T02 | Calcium-dependent protein kinase SK5                                             |
| maker-11-augustus-gene-3.0-mRNA-1    | Japonica | NA       |               |              |                          | Auxin efflux carrier component                                                   |
| maker-11-augustus-gene-3.2-mRNA-1    | Japonica | NA       |               |              | OsR498G1119344700.01.T01 |                                                                                  |
| maker-11-augustus-gene-30.26-mRNA-1  | Japonica | NA       | Kinase-LRR-TM | Os11g0171800 | OsR498G1119488300.01.T02 | Putative LRR receptor-like serine/threonine-protein kinase                       |
| maker-11-augustus-gene-30.27-mRNA-1  | Japonica | Indica   |               | Os01g0788400 | OsR498G1119488700.01.T01 | Pectinesterase                                                                   |
| maker-11-augustus-gene-30.29-mRNA-1  | Japonica | NA       | LRR           | Os11g0172300 |                          | Protein kinase domain-containing protein                                         |
| maker-11-augustus-gene-30.62-mRNA-1  | Japonica | Japonica | Kinase-LRR-TM | Os11g0172700 | OsR498G1119488300.01.T02 | Putative LRR receptor-like serine/threonine-protein kinase                       |
| maker-11-augustus-gene-30.66-mRNA-1  | Japonica | NA       |               | Os11g0171700 | OsR498G1119488200.01.T01 | FHA domain containing protein, expressed                                         |
| maker-11-augustus-gene-31.34-mRNA-1  | Japonica | Indica   | Kinase-LRR-TM | Os11g0173700 | OsR498G1119493500.01.T01 | Putative LRR receptor-like serine/threonine-protein kinase                       |
| maker-11-augustus-gene-31.36-mRNA-1  | Japonica | Indica   | Kinase-LRR-TM | Os11g0173500 | OsR498G1119494900.01.T07 | Putative LRR receptor-like serine/threonine-protein kinase                       |
| maker-11-augustus-gene-31.38-mRNA-1  | Japonica | Japonica | Kinase-LRR-TM | Os11g0173700 | OsR498G1119493500.01.T01 | Putative LRR receptor-like serine/threonine-protein kinase                       |
| maker-11-augustus-gene-31.40-mRNA-1  | Japonica | NA       | Kinase-LRR-TM | Os11g0173800 | OsR498G1119496700.01.T02 | Leucine Rich Repeat family protein, expressed                                    |
| maker-11-augustus-gene-31.44-mRNA-1  | Japonica | NA       | Kinase-LRR-TM | Os11g0173900 | OsR498G1119496900.01.T01 | Leucine-rich repeat receptor kinase (LRR-RK)                                     |
| maker-11-augustus-gene-31.54-mRNA-1  | Japonica | NA       |               | Os11g0174000 | OsR498G1119497200.01.T02 | Coatomer subunit beta                                                            |
| maker-11-augustus-gene-33.12-mRNA-1  | Japonica | NA       |               |              | OsR498G0102010300.01.T01 | Protein kinase domain-containing protein                                         |
| maker-11-augustus-gene-33.20-mRNA-1  | Japonica | Indica   |               | Os11g0177400 | OsR498G1119510400.01.T02 | ABC transporter domain-containing protein (Fragment)                             |
| maker-11-augustus-gene-34.38-mRNA-1  | Japonica | Indica   |               | Os11g0180100 | OsR498G1119519000.01.T01 |                                                                                  |
| maker-11-augustus-gene-35.26-mRNA-1  | Japonica | NA       |               |              | OsR498G1119520500.01.T03 | DEAD-box ATP-dependent RNA helicase FANCM                                        |
| maker-11-augustus-gene-35.30-mRNA-1  | Japonica | NA       |               | Os11g0180900 |                          | R2R3-Myb transcription factor                                                    |
| maker-11-augustus-gene-35.33-mRNA-1  | Japonica | NA       |               | Os11g0181100 | OsR498G1119521900.01.T01 | Transmembrane 9 superfamily member                                               |
| maker-11-augustus-gene-35.37-mRNA-1  | Japonica | NA       |               |              | OsR498G1119522500.01.T01 | Mlo like protein 4 (Fragment)                                                    |
| maker-11-augustus-gene-35.42-mRNA-1  | Japonica | NA       |               | Os11g0181500 | OsR498G1119522700.01.T01 | NifU-like protein 2 chloroplastic                                                |
| maker-11-augustus-gene-35.44-mRNA-1  | Japonica | Indica   |               | Os12g0174800 | OsR498G1119519800.01.T04 | Protein-tyrosine-phosphatase PTP1                                                |
| maker-11-augustus-gene-36.43-mRNA-1  | Japonica | NA       |               | Os11g0181900 | OsR498G1119523700.01.T02 |                                                                                  |
| maker-11-augustus-gene-36.46-mRNA-1  | Japonica | Japonica |               | Os11g0182200 | OsR498G0816559700.01.T01 | Putrescine hydroxycinnamoyltransferase 1                                         |
| maker-11-augustus-gene-36.48-mRNA-1  | Japonica | NA       |               | Os11g0182400 | OsR498G1119525400.01.T01 | F-box/WD-40 repeat-containing protein (Fragment)                                 |
| maker-11-augustus-gene-36.54-mRNA-1  | Japonica | Japonica |               | Os11g0182500 | OsR498G1119526200.01.T01 | SWI/SNF complex subunit SWI3C-like                                               |
| maker-11-augustus-gene-36.56-mRNA-1  | Japonica | NA       |               | Os11g0182900 | OsR498G1119527200.01.T02 | Ankyrin repeat family protein, putative, expressed                               |
| maker-11-augustus-gene-36.60-mRNA-1  | Japonica | NA       |               |              | OsR498G1119527800.01.T01 | SWI/SNF complex subunit SWI3C-like                                               |
| maker-11-augustus-gene-37.0-mRNA-1   | Japonica | NA       |               | Os11g0183700 | OsR498G1119529300.01.T01 | SWI/SNF complex subunit SWI3C                                                    |
| maker-11-augustus-gene-37.10-mRNA-1  | Japonica | NA       |               | Os11g0183900 |                          | Eukaryotic aspartyl protease family protein, expressed                           |
| maker-11-augustus-gene-37.12-mRNA-1  | Japonica | Japonica |               | Os11g0184200 | OsR498G0917727000.01.T01 | Beta-glucosidase 11 isoform F                                                    |
| maker-11-augustus-gene-37.15-mRNA-1  | Japonica | NA       |               | Os11g0184800 |                          | Aspartic proteinase                                                              |
| maker-11-augustus-gene-37.17-mRNA-1  | Japonica | NA       | NBS-TM        | Os11g0184900 | OsR498G1119531400.01.T01 | NAC domain transcription factor                                                  |
| maker-11-augustus-gene-37.5-mRNA-1   | Japonica | NA       |               |              | OsR498G1119529700.01.T03 | Protein CELLULOSE SYNTHASE INTERACTIVE 3 isoform C                               |
| maker-11-augustus-gene-38.36-mRNA-1  | Japonica | Indica   |               | Os01g0221100 | OsR498G1119535300.01.T01 | Jasmonoyl--L-amino acid synthetase GH3.3                                         |
| maker-11-augustus-gene-39.45-mRNA-1  | Japonica | NA       |               | Os11g0186900 | OsR498G1119536600.01.T01 | 1-aminocyclopropane-1-carboxylate oxidase                                        |

|                                     |          |          |               |              |                          |                                                                        |
|-------------------------------------|----------|----------|---------------|--------------|--------------------------|------------------------------------------------------------------------|
| maker-11-augustus-gene-39.53-mRNA-1 | Japonica | NA       |               | Os11g0187500 | OsR498G1119541000.01.T01 | Heat shock 70 kDa protein 3                                            |
| maker-11-augustus-gene-4.52-mRNA-1  | Japonica | NA       |               | Os12g0121600 | OsR498G1119346300.01.T01 | Cation/H(+) antiporter 15                                              |
| maker-11-augustus-gene-4.54-mRNA-1  | Japonica | NA       |               | Os11g0124300 | OsR498G1119347500.01.T01 | Transcription factor GRAS                                              |
| maker-11-augustus-gene-4.56-mRNA-1  | Japonica | Indica   |               | Os11g0124500 | OsR498G1119348100.01.T01 | Calcium uniporter protein (Fragment)                                   |
| maker-11-augustus-gene-4.58-mRNA-1  | Japonica | Japonica |               | Os11g0125600 | OsR498G1220855500.01.T04 | Glutathione transferase GST 23                                         |
| maker-11-augustus-gene-4.60-mRNA-1  | Japonica | NA       |               |              |                          | Ethanolamine-phosphate cytidylyltransferase                            |
| maker-11-augustus-gene-4.65-mRNA-1  | Japonica | NA       |               | Os11g0123500 | OsR498G1119346000.01.T02 | Vacuolar protein sorting-associated protein 32                         |
| maker-11-augustus-gene-4.70-mRNA-1  | Japonica | NA       |               | Os11g0124900 | OsR498G1119348600.01.T01 | Hexosyltransferase                                                     |
| maker-11-augustus-gene-4.74-mRNA-1  | Japonica | NA       |               |              |                          | Pentatricopeptide repeat-containing protein (Fragment)                 |
| maker-11-augustus-gene-41.0-mRNA-1  | Japonica | NA       |               |              | OsR498G1119543500.01.T01 |                                                                        |
| maker-11-augustus-gene-41.6-mRNA-1  | Japonica | NA       |               |              |                          | DNA topoisomerase 2-binding protein 1                                  |
| maker-11-augustus-gene-41.9-mRNA-1  | Japonica | NA       |               | Os11g0191400 | OsR498G1119545300.01.T02 | NAD kinase 2 chloroplastic                                             |
| maker-11-augustus-gene-42.0-mRNA-1  | Japonica | NA       | CC-NBS-TM     |              |                          | NB-ARC domain, putative                                                |
| maker-11-augustus-gene-43.0-mRNA-1  | Japonica | NA       |               |              |                          | F-box domain-containing protein (Fragment)                             |
| maker-11-augustus-gene-43.2-mRNA-1  | Japonica | NA       |               |              | OsR498G1119741400.01.T01 | Subtilisin-like serine endopeptidase family protein                    |
| maker-11-augustus-gene-43.3-mRNA-1  | Japonica | NA       |               |              | OsR498G1119741400.01.T03 | Subtilisin-like serine endopeptidase family protein                    |
| maker-11-augustus-gene-44.31-mRNA-1 | Japonica | NA       |               | Os10g0199200 |                          | Transposon protein, putative, CACTA, En/Spm sub-class, expressed       |
| maker-11-augustus-gene-44.36-mRNA-1 | Japonica | Indica   |               | Os11g0264200 | OsR498G1119754700.01.T02 | F-box/LRR-repeat protein 12                                            |
| maker-11-augustus-gene-44.38-mRNA-1 | Japonica | Indica   |               | Os11g0641500 | OsR498G1119753600.01.T01 | Laccase                                                                |
| maker-11-augustus-gene-44.40-mRNA-1 | Japonica | NA       |               |              | OsR498G1119755000.01.T01 | NLP transcription factor (Fragment)                                    |
| maker-11-augustus-gene-45.0-mRNA-1  | Japonica | NA       |               | Os11g0264500 | OsR498G1119761300.01.T01 |                                                                        |
| maker-11-augustus-gene-45.10-mRNA-1 | Japonica | NA       |               | Os11g0265000 | OsR498G1119763500.01.T01 | Uridine kinase                                                         |
| maker-11-augustus-gene-45.17-mRNA-1 | Japonica | NA       |               | Os11g0265400 | OsR498G1119764700.01.T01 | Dehydrogenase/reductase SDR family member 7 like                       |
| maker-11-augustus-gene-45.24-mRNA-1 | Japonica | Indica   |               | Os11g0264700 | OsR498G1119762000.01.T01 | ApaG domain-containing protein                                         |
| maker-11-augustus-gene-45.28-mRNA-1 | Japonica | NA       |               | Os11g0265200 | OsR498G1119764400.01.T02 | F-box protein SKIP16                                                   |
| maker-11-augustus-gene-45.32-mRNA-1 | Japonica | NA       |               |              | OsR498G1119764600.01.T01 |                                                                        |
| maker-11-augustus-gene-45.4-mRNA-1  | Japonica | NA       |               |              | OsR498G1119761700.01.T01 | ER membrane protein complex subunit 10 like                            |
| maker-11-augustus-gene-46.0-mRNA-1  | Japonica | NA       |               | Os11g0265600 |                          | Diphthamide synthesis DHP2, eukaryotic                                 |
| maker-11-augustus-gene-46.11-mRNA-1 | Japonica | NA       |               |              | OsR498G1119765000.01.T02 | RNA-binding ASCH domain protein                                        |
| maker-11-augustus-gene-46.18-mRNA-1 | Japonica | NA       |               | Os11g0266000 | OsR498G1119767600.01.T01 |                                                                        |
| maker-11-augustus-gene-46.22-mRNA-1 | Japonica | Indica   | NBS-TM        | Os11g0265900 | OsR498G1119768400.01.T01 | NB-ARC domain, putative                                                |
| maker-11-augustus-gene-46.24-mRNA-1 | Japonica | NA       |               |              |                          | Tetratricopeptide repeat-containing domain                             |
| maker-11-augustus-gene-46.6-mRNA-1  | Japonica | Japonica |               | Os11g0265800 | OsR498G1119766900.01.T01 | 2-oxoglutarate-dependent dioxygenase, putative                         |
| maker-11-augustus-gene-46.8-mRNA-1  | Japonica | Japonica | NBS-TM        | Os11g0266500 | OsR498G1119768700.01.T02 | Disease resistance protein RPM1                                        |
| maker-11-augustus-gene-47.27-mRNA-1 | Japonica | NA       |               |              | OsR498G1119770900.01.T01 | Endonuclease III 1, chloroplastic                                      |
| maker-11-augustus-gene-47.33-mRNA-1 | Japonica | NA       |               | Os11g0267100 | OsR498G1119770200.01.T04 | Alpha-1,6-mannosyl-glycoprotein 6-beta-N-acetylglucosaminyltransferase |
| maker-11-augustus-gene-47.42-mRNA-1 | Japonica | NA       |               | Os11g0267400 | OsR498G1119771200.01.T01 | Chaperone protein ClpC, chloroplastic                                  |
| maker-11-augustus-gene-48.25-mRNA-1 | Japonica | Indica   |               | Os11g0267400 | OsR498G1119779800.01.T01 | chaperone protein ClpC, chloroplastic                                  |
| maker-11-augustus-gene-49.33-mRNA-1 | Japonica | NA       | Kinase-TM     | Os11g0271100 | OsR498G1119793700.01.T06 | Mitogen-activated protein kinase                                       |
| maker-11-augustus-gene-49.37-mRNA-1 | Japonica | NA       |               | Os11g0269900 | OsR498G1119786800.01.T01 | Enoyl-CoA hydratase/isomerase family protein, expressed                |
| maker-11-augustus-gene-5.32-mRNA-1  | Japonica | NA       |               | Os12g0123500 | OsR498G1220856100.01.T03 | GDA1/CD39 family protein, expressed                                    |
| maker-11-augustus-gene-5.47-mRNA-1  | Japonica | Japonica |               | Os11g0126400 | OsR498G1119350900.01.T01 | GDA1/CD39 family protein, expressed                                    |
| maker-11-augustus-gene-5.50-mRNA-1  | Japonica | Indica   |               | Os11g0126400 | OsR498G1119351300.01.T01 | GDA1/CD39 family protein, expressed                                    |
| maker-11-augustus-gene-5.54-mRNA-1  | Japonica | NA       |               |              | OsR498G1119352100.01.T01 | NAC domain transcription factor                                        |
| maker-11-augustus-gene-5.57-mRNA-1  | Japonica | NA       |               | Os11g0127000 | OsR498G1119352900.01.T02 | NAC domain-containing protein 7                                        |
| maker-11-augustus-gene-5.62-mRNA-1  | Japonica | NA       |               | Os11g0127600 | OsR498G1119353500.01.T01 | NAC transcription factor 8                                             |
| maker-11-augustus-gene-52.38-mRNA-1 | Japonica | Japonica |               | Os11g0252900 | OsR498G1119717500.01.T01 | DDE Tnp4 domain-containing protein                                     |
| maker-11-augustus-gene-52.53-mRNA-1 | Japonica | NA       | CC-Kinase-TM  | Os11g0274300 | OsR498G1119797800.01.T03 | Protein kinase domain containing protein, expressed                    |
| maker-11-augustus-gene-52.59-mRNA-1 | Japonica | Indica   |               | Os11g0251200 | OsR498G1119719010.01.T01 | Protein ACCELERATED CELL DEATH 6-like isoform X1                       |
| maker-11-augustus-gene-54.41-mRNA-1 | Japonica | Indica   |               | Os11g0257200 | OsR498G1119727500.01.T01 | Anthranilate O-methyltransferase 2-like                                |
| maker-11-augustus-gene-54.43-mRNA-1 | Japonica | Indica   |               | Os11g0257200 | OsR498G1119728500.01.T01 | SAM dependent carboxyl methyltransferase                               |
| maker-11-augustus-gene-54.47-mRNA-1 | Japonica | NA       |               | Os11g0257200 | OsR498G1119729900.01.T01 | Anthranilate O-methyltransferase 2                                     |
| maker-11-augustus-gene-54.49-mRNA-1 | Japonica | NA       |               | Os11g0255300 | OsR498G1119723500.01.T01 | Thiol protease                                                         |
| maker-11-augustus-gene-54.52-mRNA-1 | Japonica | NA       |               | Os11g0255500 | OsR498G1119723100.01.T01 | NADP-dependent oxidoreductase P1, putative, expressed                  |
| maker-11-augustus-gene-54.54-mRNA-1 | Japonica | Indica   |               | Os02g0608600 | OsR498G1119725800.01.T01 | Acetohydroxy-acid synthase small subunit                               |
| maker-11-augustus-gene-54.58-mRNA-1 | Japonica | NA       |               | Os11g0256200 | OsR498G1119726600.01.T01 | Calcineurin-like metallo-phosphoesterase superfamily protein           |
| maker-11-augustus-gene-55.0-mRNA-1  | Japonica | Indica   |               | Os11g0257200 | OsR498G1119733300.01.T01 | Anthranilate O-methyltransferase 2                                     |
| maker-11-augustus-gene-55.2-mRNA-1  | Japonica | NA       |               |              |                          | Transposable element protein, putative, MuDR                           |
| maker-11-augustus-gene-55.6-mRNA-1  | Japonica | Indica   |               | Os11g0257200 | OsR498G1119733300.01.T01 | Anthranilate O-methyltransferase 2                                     |
| maker-11-augustus-gene-55.8-mRNA-1  | Japonica | Japonica | CC-LRR-NBS-TM | Os11g0258500 | OsR498G1119734000.01.T01 | NB-ARC domain, putative                                                |
| maker-11-augustus-gene-56.36-mRNA-1 | Japonica | Indica   |               | Os04g0557800 | OsR498G1119735000.01.T01 | Anthocyanin regulatory R-S protein-like                                |

|                                     |          |          |               |              |                          |                                                                     |
|-------------------------------------|----------|----------|---------------|--------------|--------------------------|---------------------------------------------------------------------|
| maker-11-augustus-gene-56.37-mRNA-1 | Japonica | NA       |               | Os11g0258700 | OsR498G1119735000.01.T01 | Anthocyanin regulatory R-S protein-like                             |
| maker-11-augustus-gene-58.25-mRNA-1 | Japonica | NA       |               |              | OsR498G1119698500.01.T02 | Glutathione S-transferase zeta class                                |
| maker-11-augustus-gene-58.29-mRNA-1 | Japonica | Indica   | Kinase-LRR-TM | Os12g0210400 | OsR498G1119698900.01.T01 | probable leucine-rich repeat receptor-like protein kinase At5g49770 |
| maker-11-augustus-gene-58.33-mRNA-1 | Japonica | Indica   |               | Os12g0209300 | OsR498G1119695800.01.T01 | ATPase, AAA family protein, expressed                               |
| maker-11-augustus-gene-58.36-mRNA-1 | Japonica | Japonica |               | Os11g0244800 | OsR498G1119697600.01.T01 | PHD finger protein Alfin1                                           |
| maker-11-augustus-gene-58.40-mRNA-1 | Japonica | NA       |               |              | OsR498G1119698400.01.T01 | CWV-type domain-containing protein                                  |
| maker-11-augustus-gene-58.42-mRNA-1 | Japonica | NA       |               | Os11g0245500 | OsR498G1119700200.01.T01 | START domain-containing protein 10                                  |
| maker-11-augustus-gene-58.44-mRNA-1 | Japonica | NA       |               |              | OsR498G1119700800.01.T01 | Heparan-alpha-glucosaminide N-acetyltransferase                     |
| maker-11-augustus-gene-59.22-mRNA-1 | Japonica | NA       | NBS-TM        |              | OsR498G1119700900.01.T04 | Leucine Rich Repeat family protein, expressed                       |
| maker-11-augustus-gene-59.25-mRNA-1 | Japonica | NA       |               | Os11g0246100 | OsR498G1119701700.01.T01 | Mitochondrial transcription termination factor-like family-1        |
| maker-11-augustus-gene-59.28-mRNA-1 | Japonica | NA       |               | Os11g0246600 |                          | Trypsin family protein with PDZ domain                              |
| maker-11-augustus-gene-59.32-mRNA-1 | Japonica | NA       |               | Os11g0246900 | OsR498G1119707300.01.T01 | F-box/ankyrin repeat protein SKIP35                                 |
| maker-11-augustus-gene-59.35-mRNA-1 | Japonica | NA       |               |              | OsR498G0203537600.01.T01 | Transposon protein, putative, ping/pong/SNOOPY sub-class            |
| maker-11-augustus-gene-6.0-mRNA-1   | Japonica | NA       |               | Os11g0127800 | OsR498G1119354300.01.T01 | FHA domain containing protein, expressed                            |
| maker-11-augustus-gene-6.11-mRNA-1  | Japonica | NA       |               | Os11g0127700 | OsR498G1119354000.01.T01 | TNF receptor-associated factor 5                                    |
| maker-11-augustus-gene-6.19-mRNA-1  | Japonica | NA       |               | Os11g0128500 | OsR498G1119358600.01.T01 | Myb-like DNA-binding domain containing protein, expressed           |
| maker-11-augustus-gene-6.21-mRNA-1  | Japonica | NA       |               | Os12g0125300 | OsR498G1220865000.01.T01 | BUB1 N-terminal domain-containing protein (Fragment)                |
| maker-11-augustus-gene-6.24-mRNA-1  | Japonica | NA       |               | Os11g0128800 | OsR498G1119359200.01.T02 | Homoserine dehydrogenase                                            |
| maker-11-augustus-gene-6.31-mRNA-1  | Japonica | NA       |               | Os11g0126100 | OsR498G1119360200.01.T01 | MatE family protein, expressed                                      |
| maker-11-augustus-gene-6.35-mRNA-1  | Japonica | NA       |               | Os11g0128900 | OsR498G1119360400.01.T03 | MatE family protein, expressed                                      |
| maker-11-augustus-gene-6.4-mRNA-1   | Japonica | NA       |               | Os12g0126200 | OsR498G1119361700.01.T02 | ELMO domain-containing protein A                                    |
| maker-11-augustus-gene-6.80-mRNA-1  | Japonica | NA       |               |              | OsR498G1119361400.01.T01 | GDLS-like Lipase/Acylhydrolase family protein, expressed            |
| maker-11-augustus-gene-6.84-mRNA-1  | Japonica | Japonica |               | Os12g0126300 | OsR498G1119362000.01.T01 | Ethylene-responsive transcription factor WRI1                       |
| maker-11-augustus-gene-60.0-mRNA-1  | Japonica | NA       |               | Os11g0247300 | OsR498G1119708900.01.T01 | Tubulin alpha chain                                                 |
| maker-11-augustus-gene-60.11-mRNA-1 | Japonica | NA       |               | Os11g0247800 |                          | HAT family dimerisation domain containing protein                   |
| maker-11-augustus-gene-60.13-mRNA-1 | Japonica | Indica   |               | Os11g0248200 | OsR498G1119712400.01.T01 | Transposon protein, putative, Mutator sub-class, expressed          |
| maker-11-augustus-gene-60.4-mRNA-1  | Japonica | NA       |               | Os11g0252400 | OsR498G1119717400.01.T04 | Protein ACCELERATED CELL DEATH 6-like isoform X1                    |
| maker-11-augustus-gene-60.6-mRNA-1  | Japonica | NA       |               |              |                          | TTF-type domain-containing protein (Fragment)                       |
| maker-11-augustus-gene-60.8-mRNA-1  | Japonica | NA       |               | Os11g0247400 | OsR498G1119709200.01.T02 | S4 RNA-binding domain-containing protein (Fragment)                 |
| maker-11-augustus-gene-61.35-mRNA-1 | Japonica | Japonica | CC-NBS-TM     | Os11g0249000 | OsR498G1119714500.01.T01 | Disease resistance protein RPM1                                     |
| maker-11-augustus-gene-61.47-mRNA-1 | Japonica | NA       |               |              | OsR498G1119715800.01.T01 | Polygalacturonase, putative, expressed                              |
| maker-11-augustus-gene-61.49-mRNA-1 | Japonica | Indica   |               | Os10g0151800 | OsR498G1119717000.01.T01 | RNA recognition motif family protein, expressed                     |
| maker-11-augustus-gene-62.0-mRNA-1  | Japonica | NA       |               | Os11g0194800 | OsR498G1119550500.01.T01 | DNA-directed RNA polymerase II subunit 10                           |
| maker-11-augustus-gene-62.2-mRNA-1  | Japonica | NA       |               | Os11g0251400 | OsR498G1119717200.01.T01 | Protein ACCELERATED CELL DEATH 6-like isoform X1                    |
| maker-11-augustus-gene-62.4-mRNA-1  | Japonica | NA       |               | Os11g0252400 | OsR498G1119717400.01.T03 | Protein ACCELERATED CELL DEATH 6-like isoform X2                    |
| maker-11-augustus-gene-62.7-mRNA-1  | Japonica | NA       | Kinase-TM     | Os11g0194900 | OsR498G1119551000.01.T02 | Protein kinase domain-containing protein                            |
| maker-11-augustus-gene-63.0-mRNA-1  | Japonica | Japonica |               | Os11g0195100 | OsR498G1119553300.01.T05 | Protein translocase subunit SecA                                    |
| maker-11-augustus-gene-63.4-mRNA-1  | Japonica | Indica   |               | Os11g0195500 | OsR498G1119553700.01.T03 | Lipase family protein, expressed                                    |
| maker-11-augustus-gene-63.8-mRNA-1  | Japonica | NA       |               | Os11g0195600 | OsR498G1119554100.01.T01 | Amino acid permease                                                 |
| maker-11-augustus-gene-64.3-mRNA-1  | Japonica | Indica   |               | Os01g0882300 | OsR498G1119559800.01.T02 | Probable magnesium transporter                                      |
| maker-11-augustus-gene-65.38-mRNA-1 | Japonica | NA       |               | Os11g0199700 |                          | Target of Myb protein 1                                             |
| maker-11-augustus-gene-66.50-mRNA-1 | Japonica | NA       |               | Os11g0201332 | OsR498G1119571800.01.T02 | F-box family-2                                                      |
| maker-11-augustus-gene-67.43-mRNA-1 | Japonica | NA       |               | Os06g0272601 | OsR498G0204300200.01.T01 | dNK domain-containing protein                                       |
| maker-11-augustus-gene-67.48-mRNA-1 | Japonica | NA       |               |              |                          | F-box domain, putative                                              |
| maker-11-augustus-gene-67.51-mRNA-1 | Japonica | Japonica |               | Os11g0201800 | OsR498G1119574200.01.T01 | F-box domain, putative                                              |
| maker-11-augustus-gene-67.55-mRNA-1 | Japonica | Indica   |               | Os11g0201800 | OsR498G1119574400.01.T01 | F-box family-4                                                      |
| maker-11-augustus-gene-67.57-mRNA-1 | Japonica | NA       |               | Os11g0202000 | OsR498G1119574800.01.T01 | F-box family-2                                                      |
| maker-11-augustus-gene-69.50-mRNA-1 | Japonica | NA       |               | Os11g0206700 | OsR498G1119585800.01.T01 | Extra-large guanine nucleotide-binding protein like                 |
| maker-11-augustus-gene-7.42-mRNA-1  | Japonica | NA       |               | Os11g0130300 | OsR498G1119363500.01.T01 | RING-type E3 ubiquitin transferase                                  |
| maker-11-augustus-gene-7.46-mRNA-1  | Japonica | NA       |               | Os11g0130600 | OsR498G1119364700.01.T01 |                                                                     |
| maker-11-augustus-gene-7.53-mRNA-1  | Japonica | NA       |               | Os11g0131900 | OsR498G1119368100.01.T04 | Non-reducing end alpha-L-arabinofuranosidase                        |
| maker-11-augustus-gene-7.54-mRNA-1  | Japonica | Indica   |               | Os11g0129800 | OsR498G1119362400.01.T01 |                                                                     |
| maker-11-augustus-gene-7.59-mRNA-1  | Japonica | NA       |               |              |                          | CID domain-containing protein                                       |
| maker-11-augustus-gene-7.65-mRNA-1  | Japonica | NA       |               | Os11g0130200 | OsR498G1119363200.01.T01 | CID domain-containing protein                                       |
| maker-11-augustus-gene-7.68-mRNA-1  | Japonica | NA       |               |              | OsR498G1220870800.01.T01 | FBD domain-containing protein                                       |
| maker-11-augustus-gene-7.73-mRNA-1  | Japonica | Indica   | NBS-TM        | Os08g0170200 | OsR498G1119365800.01.T01 | Disease resistance protein RPM1                                     |
| maker-11-augustus-gene-7.75-mRNA-1  | Japonica | Indica   |               | Os11g0131200 | OsR498G1119366400.01.T02 | Peroxisomal membrane 22 kDa family protein isoform 1                |
| maker-11-augustus-gene-7.80-mRNA-1  | Japonica | NA       |               | Os11g0130900 | OsR498G1220874000.01.T02 | Mitochondrial import inner membrane translocase subunit             |
| maker-11-augustus-gene-70.29-mRNA-1 | Japonica | NA       |               |              |                          | Transcriptional corepressor SEUSS                                   |
| maker-11-augustus-gene-70.39-mRNA-1 | Japonica | Indica   | Kinase-TM     | Os11g0207200 | OsR498G1119591700.01.T01 | Mitogen-activated protein kinase kinase kinase 3                    |
| maker-11-augustus-gene-70.45-mRNA-1 | Japonica | NA       |               | Os11g0207600 | OsR498G1119593300.01.T01 | transcription factor MYB52                                          |

|                                     |          |          |               |              |                          |                                                                            |
|-------------------------------------|----------|----------|---------------|--------------|--------------------------|----------------------------------------------------------------------------|
| maker-11-augustus-gene-70.47-mRNA-1 | Japonica | NA       |               |              | OsR498G0203391700.01.T01 | Flavin-containing monooxygenase                                            |
| maker-11-augustus-gene-71.0-mRNA-1  | Japonica | NA       |               | Os11g0208000 | OsR498G1119594500.01.T03 | F-box domain containing protein, expressed                                 |
| maker-11-augustus-gene-71.10-mRNA-1 | Japonica | Japonica | Kinase-LRR-TM | Os11g0208900 | OsR498G1119599000.01.T01 | Serine-threonine protein kinase plant-type                                 |
| maker-11-augustus-gene-71.3-mRNA-1  | Japonica | NA       |               | Os11g0208100 | OsR498G1119595800.01.T02 | F-box family-2                                                             |
| maker-11-augustus-gene-71.5-mRNA-1  | Japonica | NA       |               |              | OsR498G1119596600.01.T02 | F-box family-2                                                             |
| maker-11-augustus-gene-71.7-mRNA-1  | Japonica | NA       |               |              | OsR498G1119597400.01.T01 | F-box domain containing protein, expressed                                 |
| maker-11-augustus-gene-71.9-mRNA-1  | Japonica | Indica   | Kinase-TM     | Os07g0186200 | OsR498G1119598200.01.T01 | Serine/threonine-protein kinase                                            |
| maker-11-augustus-gene-72.24-mRNA-1 | Japonica | NA       |               | Os11g0209100 | OsR498G1119599800.01.T01 | F-box domain containing protein                                            |
| maker-11-augustus-gene-72.26-mRNA-1 | Japonica | NA       |               | Os11g0209200 | OsR498G1119600000.01.T01 | F-box family-6                                                             |
| maker-11-augustus-gene-72.29-mRNA-1 | Japonica | NA       |               |              | OsR498G1119601000.01.T02 | F-box domain containing protein, expressed                                 |
| maker-11-augustus-gene-72.31-mRNA-1 | Japonica | Indica   |               | Os11g0209500 | OsR498G1119601400.01.T02 | F-box domain containing protein, expressed                                 |
| maker-11-augustus-gene-72.34-mRNA-1 | Japonica | NA       |               |              | OsR498G1119603400.01.T01 | Phosphatidylinositol kinase                                                |
| maker-11-augustus-gene-72.41-mRNA-1 | Japonica | Japonica |               | Os11g0209900 | OsR498G1119604000.01.T01 | Cysteine desulfurylase                                                     |
| maker-11-augustus-gene-72.43-mRNA-1 | Japonica | Indica   |               | Os12g0191500 | OsR498G1119605000.01.T01 | Peroxidase                                                                 |
| maker-11-augustus-gene-73.13-mRNA-1 | Japonica | Indica   |               | Os11g0210600 | OsR498G1119607600.01.T03 | Cinnamyl-alcohol dehydrogenase                                             |
| maker-11-augustus-gene-73.3-mRNA-1  | Japonica | NA       |               | Os11g0210300 | OsR498G1119605800.01.T01 | Alcohol dehydrogenase ADH1                                                 |
| maker-11-augustus-gene-73.9-mRNA-1  | Japonica | NA       |               | Os11g0210500 | OsR498G1119606600.01.T01 | Alcohol dehydrogenase ADH2                                                 |
| maker-11-augustus-gene-74.0-mRNA-1  | Japonica | NA       |               |              |                          | DUF4220 domain-containing protein (Fragment)                               |
| maker-11-augustus-gene-74.2-mRNA-1  | Japonica | NA       | LRR-TM        |              | OsR498G1119610600.01.T03 | NBS-LRR disease resistance protein family-4                                |
| maker-11-augustus-gene-74.5-mRNA-1  | Japonica | NA       | CC-LRR-NBS-TM |              | OsR498G1119611800.01.T01 | NBS-LRR disease resistance protein family-4                                |
| maker-11-augustus-gene-75.13-mRNA-1 | Japonica | NA       |               | Os11g0213600 | OsR498G1119615200.01.T01 | Carboxypeptidase                                                           |
| maker-11-augustus-gene-75.17-mRNA-1 | Japonica | Indica   | LRR-TM        | Os11g0213700 | OsR498G1119615600.01.T02 | Disease resistance protein RGA2                                            |
| maker-11-augustus-gene-75.2-mRNA-1  | Japonica | NA       | Kinase-TM     |              | OsR498G1119613600.01.T01 | Coatomer beta subunit, putative                                            |
| maker-11-augustus-gene-75.20-mRNA-1 | Japonica | NA       | CC-NBS-TM     | Os11g0213800 | OsR498G1119615600.01.T05 | NBS-LRR type protein (Fragment)                                            |
| maker-11-augustus-gene-75.29-mRNA-1 | Japonica | NA       |               |              | OsR498G1119616200.01.T02 | Ubiquitin-like-specific protease 2                                         |
| maker-11-augustus-gene-75.8-mRNA-1  | Japonica | NA       | Kinase-TM     |              | OsR498G1119614000.01.T02 | Putative mitogen-activated protein (MAP) kinase kinase kinase Ste11, Crypt |
| maker-11-augustus-gene-76.0-mRNA-1  | Japonica | Japonica |               | Os11g0215300 | OsR498G1119618200.01.T01 |                                                                            |
| maker-11-augustus-gene-77.35-mRNA-1 | Japonica | NA       |               | Os11g0216000 | OsR498G1119619100.01.T03 | Pyruvate kinase                                                            |
| maker-11-augustus-gene-77.39-mRNA-1 | Japonica | NA       |               | Os11g0216900 | OsR498G1119622100.01.T02 | Methylthioribose-1-phosphate isomerase                                     |
| maker-11-augustus-gene-77.44-mRNA-1 | Japonica | NA       |               | Os11g0217300 | OsR498G1119622300.01.T03 | Glucuronokinase G                                                          |
| maker-11-augustus-gene-77.48-mRNA-1 | Japonica | NA       |               | Os11g0218000 | OsR498G1119624300.01.T01 | BZIP type transcription factor                                             |
| maker-11-augustus-gene-77.51-mRNA-1 | Japonica | NA       |               | Os11g0216300 | OsR498G1119619600.01.T01 | Protein ACTIVITY OF BC1 COMPLEX KINASE 1, chloroplastic isoform A          |
| maker-11-augustus-gene-77.60-mRNA-1 | Japonica | Indica   |               | Os12g0193200 | OsR498G1119622600.01.T01 | GTP--RNA guanylyltransferase                                               |
| maker-11-augustus-gene-78.0-mRNA-1  | Japonica | NA       |               |              | OsR498G1119629900.01.T02 | RNase H domain-containing protein                                          |
| maker-11-augustus-gene-78.2-mRNA-1  | Japonica | NA       |               |              | OsR498G1119628600.01.T02 | Lon protease                                                               |
| maker-11-augustus-gene-79.33-mRNA-1 | Japonica | NA       |               |              | OsR498G1119632900.01.T01 | Calmodulin-interacting protein 111                                         |
| maker-11-augustus-gene-79.35-mRNA-1 | Japonica | NA       |               |              |                          | Reverse transcriptase domain-containing protein                            |
| maker-11-augustus-gene-79.40-mRNA-1 | Japonica | Indica   |               | Os11g0221000 | OsR498G1119634900.01.T01 | Auxin-responsive protein IAA27                                             |
| maker-11-augustus-gene-8.2-mRNA-1   | Japonica | NA       |               | Os11g0132600 | OsR498G1119370100.01.T06 | Non-reducing end alpha-L-arabinofuranosidase                               |
| maker-11-augustus-gene-8.45-mRNA-1  | Japonica | NA       |               | Os11g0133800 | OsR498G1119375500.01.T01 | S-acyltransferase                                                          |
| maker-11-augustus-gene-8.49-mRNA-1  | Japonica | Indica   |               | Os12g0129000 | OsR498G1119369600.01.T02 | Transmembrane protein 230                                                  |
| maker-11-augustus-gene-8.55-mRNA-1  | Japonica | NA       |               | Os11g0132700 | OsR498G1119370400.01.T05 | Aladin                                                                     |
| maker-11-augustus-gene-8.67-mRNA-1  | Japonica | NA       |               |              | OsR498G1119374800.01.T02 | Glutamine--fructose-6-phosphate transaminase (isomerizing)                 |
| maker-11-augustus-gene-8.76-mRNA-1  | Japonica | Japonica |               | Os11g0133900 | OsR498G1119375800.01.T02 | Glucosamine fructose-6-phosphate aminotransferase1                         |
| maker-11-augustus-gene-80.32-mRNA-1 | Japonica | Indica   |               | Os07g0179600 | OsR498G1119638500.01.T01 | Neprosin domain-containing protein (Fragment)                              |
| maker-11-augustus-gene-80.34-mRNA-1 | Japonica | NA       |               | Os11g0222225 | OsR498G1119638200.01.T01 | SERPIN domain-containing protein (Fragment)                                |
| maker-11-augustus-gene-81.0-mRNA-1  | Japonica | Indica   |               | Os07g0179600 | OsR498G1119638500.01.T01 | Neprosin domain-containing protein (Fragment)                              |
| maker-11-augustus-gene-82.2-mRNA-1  | Japonica | NA       | Kinase        |              |                          | Retrotransposon protein, putative, LINE subclass                           |
| maker-11-augustus-gene-82.6-mRNA-1  | Japonica | Indica   | CC-NBS-TM     | Os11g0226700 | OsR498G1119646100.01.T02 | NBS-LRR type protein (Fragment)                                            |
| maker-11-augustus-gene-82.8-mRNA-1  | Japonica | NA       | CC-NBS-TM     |              |                          | Protein kinase domain-containing protein                                   |
| maker-11-augustus-gene-83.0-mRNA-1  | Japonica | NA       |               |              |                          |                                                                            |
| maker-11-augustus-gene-83.3-mRNA-1  | Japonica | Japonica | CC-LRR-NBS-TM | Os11g0227100 | OsR498G1119648000.01.T02 | NBS-LRR type resistance protein (Fragment)                                 |
| maker-11-augustus-gene-84.0-mRNA-1  | Japonica | Indica   |               | Os11g0230400 | OsR498G1119652500.01.T01 | SERPIN domain-containing protein (Fragment)                                |
| maker-11-augustus-gene-84.4-mRNA-1  | Japonica | Indica   |               | Os11g0230700 | OsR498G1119653900.01.T01 | SERPIN domain-containing protein (Fragment)                                |
| maker-11-augustus-gene-85.28-mRNA-1 | Japonica | NA       | Kinase-LRR-TM |              | OsR498G1119660500.01.T01 | Leucine-rich repeat receptor-like serine/threonine-protein kinase BAM3     |
| maker-11-augustus-gene-86.16-mRNA-1 | Japonica | NA       |               |              | OsR498G1119665600.01.T03 | UDP-glucose-fructose-phosphate glucosyltransferase                         |
| maker-11-augustus-gene-86.17-mRNA-1 | Japonica | NA       |               |              |                          | UDP-glucose-fructose-phosphate glucosyltransferase                         |
| maker-11-augustus-gene-86.6-mRNA-1  | Japonica | NA       |               | Os11g0235200 | OsR498G1119662400.01.T01 | Proton-dependent oligopeptide transporter family                           |
| maker-11-augustus-gene-87.36-mRNA-1 | Japonica | NA       | CC-LRR-NBS-TM | Os11g0237900 | OsR498G1119671300.01.T01 | Putative disease resistance RPP13-like protein 3                           |
| maker-11-augustus-gene-87.38-mRNA-1 | Japonica | Indica   |               | Os05g0318300 | OsR498G1119671000.01.T02 | RNase III domain-containing protein (Fragment)                             |
| maker-11-augustus-gene-88.0-mRNA-1  | Japonica | NA       |               |              | OsR498G1119676200.01.T01 | Serpin (Serine protease inhibitor)                                         |



|                                      |          |          |               |              |                          |                                                               |
|--------------------------------------|----------|----------|---------------|--------------|--------------------------|---------------------------------------------------------------|
| maker-11-augustus-gene-88.2-mRNA-1   | Japonica | NA       |               |              | OsR498G1119677200.01.T01 | Serpin (Serine protease inhibitor)                            |
| maker-11-augustus-gene-88.3-mRNA-1   | Japonica | NA       |               | Os03g0193900 | OsR498G0101213400.01.T05 | SERPIN domain-containing protein                              |
| maker-11-augustus-gene-89.0-mRNA-1   | Japonica | NA       |               | Os11g0240900 | OsR498G1119683100.01.T04 | CCR4-NOT transcription complex subunit 11                     |
| maker-11-augustus-gene-89.5-mRNA-1   | Japonica | NA       |               |              |                          | PH domain-containing protein                                  |
| maker-11-augustus-gene-89.7-mRNA-1   | Japonica | NA       |               | Os11g0241900 | OsR498G1119686000.01.T01 | Protein trichome birefringence-like protein 14                |
| maker-11-augustus-gene-9.0-mRNA-1    | Japonica | NA       | Kinase-TM     | Os12g0132200 | OsR498G1119377100.01.T07 | Non-specific serine/threonine protein kinase                  |
| maker-11-augustus-gene-9.17-mRNA-1   | Japonica | NA       |               | Os12g0132300 | OsR498G1119377400.01.T01 | Calmodulin-4                                                  |
| maker-11-augustus-gene-9.18-mRNA-1   | Japonica | NA       |               | Os11g0134500 | OsR498G1119377600.01.T01 | Glutamate-rich WD repeat-containing protein 1                 |
| maker-11-augustus-gene-9.25-mRNA-1   | Japonica | NA       |               |              |                          | Major facilitator superfamily antiporter, putative, expressed |
| maker-11-augustus-gene-9.40-mRNA-1   | Japonica | NA       |               | Os11g0135000 | OsR498G1119378200.01.T02 | Major facilitator superfamily antiporter                      |
| maker-11-augustus-gene-9.46-mRNA-1   | Japonica | NA       |               | Os12g0133000 | OsR498G1220891200.01.T01 | Major facilitator superfamily antiporter                      |
| maker-11-augustus-gene-9.50-mRNA-1   | Japonica | Indica   |               | Os08g0130500 | OsR498G1119380000.01.T01 | 60S acidic ribosomal protein P0                               |
| maker-11-augustus-gene-9.6-mRNA-1    | Japonica | Indica   |               | Os12g0131900 | OsR498G1119376200.01.T01 | Rhamnogalacturonan endolyase                                  |
| maker-11-augustus-gene-90.0-mRNA-1   | Japonica | NA       |               | Os11g0242100 | OsR498G1119686500.01.T06 | Non-lysosomal glucosylceramidase                              |
| maker-11-augustus-gene-90.12-mRNA-1  | Japonica | Japonica |               | Os11g0242700 | OsR498G1119689500.01.T01 | fibroin heavy chain isoform X1                                |
| maker-11-augustus-gene-90.15-mRNA-1  | Japonica | NA       |               | Os11g0242800 | OsR498G1119689900.01.T02 | Chlorophyll a-b binding protein, chloroplastic                |
| maker-11-augustus-gene-90.20-mRNA-1  | Japonica | NA       |               | Os11g0242400 | OsR498G1119688800.01.T03 | Rieske domain-containing protein (Fragment)                   |
| maker-11-augustus-gene-90.7-mRNA-1   | Japonica | NA       |               | Os11g0242200 | OsR498G1119687300.01.T01 | PPM-type phosphatase domain-containing protein                |
| maker-11-augustus-gene-90.9-mRNA-1   | Japonica | NA       | Kinase-TM     | Os11g0242500 | OsR498G1119688900.01.T03 | Cyclin-dependent kinase C                                     |
| maker-11-augustus-gene-99.0-mRNA-1   | Japonica | NA       |               |              | OsR498G0917954800.01.T01 | Transposon protein, putative, CACTA, En/Spm sub-class         |
| maker-11-augustus-gene-99.3-mRNA-1   | Japonica | NA       |               | Os07g0165500 | OsR498G0203722500.01.T01 | Cytokinin inducible protein-like                              |
| maker-11-augustus-gene-99.5-mRNA-1   | Japonica | NA       |               | Os11g0414000 | OsR498G1119939800.01.T02 | Basic leucine zipper and W2 domain-containing protein 2       |
| maker-12-augustus-gene-0.34-mRNA-1   | Japonica | NA       |               |              |                          | Pleiotropic drug resistance protein 3                         |
| maker-12-augustus-gene-0.41-mRNA-1   | Japonica | NA       |               |              | OsR498G1220782800.01.T02 | Autophagy-related protein 8D                                  |
| maker-12-augustus-gene-0.43-mRNA-1   | Japonica | Japonica |               | Os11g0100300 | OsR498G1220783200.01.T01 |                                                               |
| maker-12-augustus-gene-0.45-mRNA-1   | Japonica | NA       |               | Os12g0100500 | OsR498G1220783400.01.T01 | Caffeoylshikimate esterase                                    |
| maker-12-augustus-gene-1.0-mRNA-1    | Japonica | Japonica |               | Os12g0101000 | OsR498G1220784700.01.T03 | CCT domain-containing protein                                 |
| maker-12-augustus-gene-1.22-mRNA-1   | Japonica | NA       |               | Os12g0102400 | OsR498G1220788900.01.T02 | RNA binding (RRM/RBD/RNP motifs) family protein               |
| maker-12-augustus-gene-1.23-mRNA-1   | Japonica | NA       |               | Os12g0102400 | OsR498G1220788900.01.T03 | RNA binding (RRM/RBD/RNP motifs) family protein               |
| maker-12-augustus-gene-1.34-mRNA-1   | Japonica | NA       | Kinase-LRR-TM |              | OsR498G1220789200.01.T06 | Leucine-rich repeat protein kinase family protein             |
| maker-12-augustus-gene-1.5-mRNA-1    | Japonica | NA       | Kinase-TM     |              |                          | Nonphototropic hypocotyl 1                                    |
| maker-12-augustus-gene-10.42-mRNA-1  | Japonica | Japonica |               | Os12g0119700 | OsR498G1119333300.01.T02 | Retrotransposon protein, putative, Ty1-copia subclass         |
| maker-12-augustus-gene-10.47-mRNA-1  | Japonica | NA       |               | Os11g0120600 | OsR498G1119336300.01.T01 | Bis(5'-adenosyl)-triphosphatase                               |
| maker-12-augustus-gene-10.52-mRNA-1  | Japonica | NA       |               | Os12g0120000 | OsR498G1220829700.01.T01 | Serine/arginine repetitive matrix protein                     |
| maker-12-augustus-gene-10.54-mRNA-1  | Japonica | NA       |               | Os11g0120700 | OsR498G1220827300.01.T01 |                                                               |
| maker-12-augustus-gene-10.57-mRNA-1  | Japonica | NA       |               | Os12g0120500 | OsR498G1119336800.01.T03 |                                                               |
| maker-12-augustus-gene-10.60-mRNA-1  | Japonica | NA       |               | Os12g0121000 | OsR498G1220824900.01.T02 | Protein kinase APK1B chloroplast                              |
| maker-12-augustus-gene-10.62-mRNA-1  | Japonica | NA       | Kinase        | Os11g0121400 | OsR498G1220824700.01.T01 | Serine-threonine kinase STK11                                 |
| maker-12-augustus-gene-10.68-mRNA-1  | Japonica | NA       |               |              |                          | Ethanolamine-phosphate cytidylyltransferase                   |
| maker-12-augustus-gene-10.73-mRNA-1  | Japonica | NA       |               | Os12g0121400 | OsR498G1220823700.01.T03 | Vacuolar protein sorting-associated protein 32                |
| maker-12-augustus-gene-100.37-mRNA-1 | Japonica | NA       |               | Os12g0270100 | OsR498G1221264000.01.T03 | Putative heme chaperone                                       |
| maker-12-augustus-gene-100.40-mRNA-1 | Japonica | Indica   |               | Os12g0270900 | OsR498G1221267000.01.T01 | Sulfotransferase                                              |
| maker-12-augustus-gene-101.37-mRNA-1 | Japonica | NA       |               | Os12g0271600 | OsR498G1221270500.01.T02 |                                                               |
| maker-12-augustus-gene-101.39-mRNA-1 | Japonica | NA       |               | Os12g0271700 | OsR498G1221270800.01.T01 | Solanesyl-diphosphate synthase 2, chloroplastic               |
| maker-12-augustus-gene-102.0-mRNA-1  | Japonica | Japonica | CC-NBS-TM     | Os12g0273266 | OsR498G1221272600.01.T01 | Disease resistance protein RPM1, putative, expressed          |
| maker-12-augustus-gene-102.3-mRNA-1  | Japonica | NA       | CC-NBS-TM     |              |                          | NB-ARC domain containing protein, expressed                   |
| maker-12-augustus-gene-103.40-mRNA-1 | Japonica | Indica   |               | Os12g0273700 | OsR498G1221278700.01.T03 | TPX2 (Targeting protein for Xklp2) protein family             |
| maker-12-augustus-gene-103.44-mRNA-1 | Japonica | Indica   |               | Os12g0273900 | OsR498G1221278900.01.T01 | Senescence-specific cysteine protease SAG39                   |
| maker-12-augustus-gene-103.49-mRNA-1 | Japonica | Indica   |               | Os12g0274200 | OsR498G1221280200.01.T01 | GDSL-motif lipase/hydrolase, putative                         |
| maker-12-augustus-gene-103.51-mRNA-1 | Japonica | NA       |               | Os12g0274700 | OsR498G1221281600.01.T01 | Ribulose biphosphate carboxylase small chain                  |
| maker-12-augustus-gene-104.35-mRNA-1 | Japonica | Japonica |               | Os12g0275500 | OsR498G1221283500.01.T01 |                                                               |
| maker-12-augustus-gene-104.37-mRNA-1 | Japonica | NA       |               |              | OsR498G0714211300.01.T01 |                                                               |
| maker-12-augustus-gene-104.40-mRNA-1 | Japonica | NA       |               |              | OsR498G1221284200.01.T02 | Cation/H(+) antiporter 15                                     |
| maker-12-augustus-gene-104.42-mRNA-1 | Japonica | NA       |               | Os12g0276100 | OsR498G1221290200.01.T02 | Rho GTPase-activating protein like                            |
| maker-12-augustus-gene-105.23-mRNA-1 | Japonica | NA       |               | Os12g0277500 | OsR498G1221297100.01.T01 | ruBisCO large subunit-binding protein subunit alpha           |
| maker-12-augustus-gene-105.27-mRNA-1 | Japonica | NA       |               |              | OsR498G1221293000.01.T01 |                                                               |
| maker-12-augustus-gene-105.29-mRNA-1 | Japonica | NA       |               | Os12g0277000 | OsR498G1221295000.01.T01 | RING-type E3 ubiquitin transferase                            |
| maker-12-augustus-gene-105.31-mRNA-1 | Japonica | NA       |               | Os12g0277400 | OsR498G1221297000.01.T01 | RING-type E3 ubiquitin transferase                            |
| maker-12-augustus-gene-105.34-mRNA-1 | Japonica | NA       |               |              | OsR498G1221297800.01.T01 |                                                               |
| maker-12-augustus-gene-105.36-mRNA-1 | Japonica | NA       |               |              | OsR498G1221298800.01.T01 |                                                               |
| maker-12-augustus-gene-106.29-mRNA-1 | Japonica | NA       |               |              | OsR498G1120154400.01.T01 |                                                               |

|                                      |          |          |                |              |                          |                                                                             |
|--------------------------------------|----------|----------|----------------|--------------|--------------------------|-----------------------------------------------------------------------------|
| maker-12-augustus-gene-106.34-mRNA-1 | Japonica | NA       |                | Os01g0650700 |                          | Transposon protein, putative, CACTA, En/Spm sub-class                       |
| maker-12-augustus-gene-106.36-mRNA-1 | Japonica | NA       |                | Os12g0278700 | OsR498G1221303800.01.T03 | Cystinosin like                                                             |
| maker-12-augustus-gene-107.15-mRNA-1 | Japonica | NA       |                |              | OsR498G1221305700.01.T02 | RNA helicase, ATP-dependent, SK12/DOB1 protein                              |
| maker-12-augustus-gene-107.19-mRNA-1 | Japonica | NA       |                | Os12g0278800 | OsR498G1221304600.01.T03 | Zinc finger CCCH domain-containing protein 65                               |
| maker-12-augustus-gene-107.23-mRNA-1 | Japonica | NA       |                | Os12g0278900 | OsR498G1221305600.01.T01 |                                                                             |
| maker-12-augustus-gene-107.25-mRNA-1 | Japonica | NA       |                | Os12g0279100 |                          | Lysine-specific demethylase REF6                                            |
| maker-12-augustus-gene-107.27-mRNA-1 | Japonica | NA       |                | Os12g0279600 | OsR498G1221307200.01.T02 | DNA-(apurinic or apyrimidinic site) endonuclease                            |
| maker-12-augustus-gene-108.36-mRNA-1 | Japonica | NA       |                |              | OsR498G1221308400.01.T01 | Cysteine proteinase EP-B 1                                                  |
| maker-12-augustus-gene-109.40-mRNA-1 | Japonica | NA       | CC-NBS-TM Pi42 | Os12g0281600 | OsR498G1221312700.01.T02 | NB-ARC domain containing protein, expressed                                 |
| maker-12-augustus-gene-109.42-mRNA-1 | Japonica | NA       |                | Os12g0282400 |                          | ATP synthase subunit-like protein                                           |
| maker-12-augustus-gene-109.46-mRNA-1 | Japonica | NA       |                |              |                          |                                                                             |
| maker-12-augustus-gene-109.48-mRNA-1 | Japonica | NA       |                | Os12g0283100 | OsR498G1221319200.01.T01 | PAP/OAS1 substrate-binding domain superfamily                               |
| maker-12-augustus-gene-11.0-mRNA-1   | Japonica | NA       |                | Os12g0122000 | OsR498G1220851500.01.T01 | Transcription factor GRAS                                                   |
| maker-12-augustus-gene-11.2-mRNA-1   | Japonica | Indica   |                | Os12g0122100 | OsR498G1220852100.01.T01 | Calcium uniporter protein (Fragment)                                        |
| maker-12-augustus-gene-11.32-mRNA-1  | Japonica | NA       |                | Os11g0124900 | OsR498G1220854200.01.T01 | Hexosyltransferase                                                          |
| maker-12-augustus-gene-110.39-mRNA-1 | Japonica | NA       |                | Os12g0283900 | OsR498G1221321500.01.T01 | Pentatricopeptide repeat                                                    |
| maker-12-augustus-gene-110.41-mRNA-1 | Japonica | Japonica |                | Os12g0284000 | OsR498G1221322100.01.T01 | Ultraviolet-B receptor UVR8                                                 |
| maker-12-augustus-gene-110.45-mRNA-1 | Japonica | Indica   | PTR            | Os12g0285100 | OsR498G1221322300.01.T01 | Disease resistance protein                                                  |
| maker-12-augustus-gene-110.47-mRNA-1 | Japonica | NA       |                |              | OsR498G1221322700.01.T01 | Disease resistance protein (Fragment)                                       |
| maker-12-augustus-gene-110.52-mRNA-1 | Japonica | NA       |                |              | OsR498G1221321400.01.T01 | Protein RETICULATA-RELATED 3 chloroplastic                                  |
| maker-12-augustus-gene-111.26-mRNA-1 | Japonica | Japonica | PTR            | Os12g0285100 | OsR498G1221325200.01.T02 | Disease resistance protein (Fragment)                                       |
| maker-12-augustus-gene-111.31-mRNA-1 | Japonica | NA       |                |              | OsR498G1221325900.01.T02 | Ufm1-specific protease                                                      |
| maker-12-augustus-gene-111.37-mRNA-1 | Japonica | NA       |                | Os12g0285600 | OsR498G1221326600.01.T03 | Oxysterol-binding protein-related protein 1D                                |
| maker-12-augustus-gene-112.28-mRNA-1 | Japonica | Indica   |                | Os12g0287200 | OsR498G1221331700.01.T03 | Mago nashi                                                                  |
| maker-12-augustus-gene-112.30-mRNA-1 | Japonica | NA       |                | Os12g0286600 | OsR498G1221330000.01.T01 | Abhydrolase domain-containing protein FAM108C1 family                       |
| maker-12-augustus-gene-112.36-mRNA-1 | Japonica | Indica   |                | Os12g0287300 | OsR498G1221332000.01.T03 | Cysteine desulfurase                                                        |
| maker-12-augustus-gene-113.42-mRNA-1 | Japonica | NA       |                |              | OsR498G1221342900.01.T03 | AAA+ ATPase domain                                                          |
| maker-12-augustus-gene-113.58-mRNA-1 | Japonica | NA       |                | Os12g0288900 | OsR498G1221340400.01.T01 | Mitochondrial inner membrane protease ATP23                                 |
| maker-12-augustus-gene-114.0-mRNA-1  | Japonica | Indica   | Kinase         | Os05g0511400 | OsR498G1221346100.01.T01 | Serine/threonine-protein kinase CBK1                                        |
| maker-12-augustus-gene-114.12-mRNA-1 | Japonica | NA       |                |              | OsR498G1221346400.01.T07 | Quinolinate synthase, chloroplastic                                         |
| maker-12-augustus-gene-115.19-mRNA-1 | Japonica | Japonica |                | Os12g0291200 | OsR498G1221348500.01.T01 | Ribulose biphosphate carboxylase small chain                                |
| maker-12-augustus-gene-115.21-mRNA-1 | Japonica | NA       |                | Os12g0291400 | OsR498G1221349500.01.T01 | Ribulose biphosphate carboxylase small chain                                |
| maker-12-augustus-gene-115.23-mRNA-1 | Japonica | NA       |                | Os12g0292400 | OsR498G1221350300.01.T01 | Ribulose biphosphate carboxylase small chain                                |
| maker-12-augustus-gene-116.14-mRNA-1 | Japonica | NA       |                |              | OsR498G1221351500.01.T04 | Chloroplast sensor kinase chloroplastic                                     |
| maker-12-augustus-gene-116.19-mRNA-1 | Japonica | NA       |                |              | OsR498G1221356100.01.T05 | WD repeat-containing protein 89 homolog                                     |
| maker-12-augustus-gene-116.24-mRNA-1 | Japonica | NA       |                | Os12g0293100 | OsR498G1221351800.01.T01 | Telomerase reverse transcriptase                                            |
| maker-12-augustus-gene-118.0-mRNA-1  | Japonica | NA       |                |              | OsR498G0714235700.01.T01 | HGWP repeat containing protein-like                                         |
| maker-12-augustus-gene-118.2-mRNA-1  | Japonica | Japonica |                | Os12g0297500 | OsR498G1221360600.01.T01 | Phosphoglucan water dikinase chloroplastic                                  |
| maker-12-augustus-gene-122.10-mRNA-1 | Japonica | NA       |                | Os12g0403800 | OsR498G1221362900.01.T03 | 3'-5'-exoribonuclease family protein isoform 2                              |
| maker-12-augustus-gene-125.29-mRNA-1 | Japonica | NA       |                | Os12g0405200 | OsR498G1221366900.01.T02 | 15-cis-zeta-carotene isomerase                                              |
| maker-12-augustus-gene-125.32-mRNA-1 | Japonica | NA       |                | Os12g0405700 |                          | Wound-inducible basic                                                       |
| maker-12-augustus-gene-125.34-mRNA-1 | Japonica | NA       |                | Os12g0406100 | OsR498G1221368800.01.T03 | Beta-glucanase, putative                                                    |
| maker-12-augustus-gene-125.38-mRNA-1 | Japonica | NA       |                | Os12g0406200 | OsR498G1221369000.01.T01 |                                                                             |
| maker-12-augustus-gene-126.0-mRNA-1  | Japonica | NA       |                |              |                          |                                                                             |
| maker-12-augustus-gene-126.4-mRNA-1  | Japonica | NA       |                | Os12g0407500 | OsR498G1221372600.01.T03 | Phosphatidylinositol 3 4 5-trisphosphate 3-phosphatase and dual-specificity |
| maker-12-augustus-gene-127.37-mRNA-1 | Japonica | NA       |                |              | OsR498G1221377100.01.T01 |                                                                             |
| maker-12-augustus-gene-127.39-mRNA-1 | Japonica | Indica   |                | Os12g0409000 | OsR498G1221374800.01.T01 | Serine hydroxymethyltransferase                                             |
| maker-12-augustus-gene-127.42-mRNA-1 | Japonica | NA       |                | Os12g0409700 | OsR498G1221377600.01.T01 | ABC transporter domain-containing protein (Fragment)                        |
| maker-12-augustus-gene-132.38-mRNA-1 | Japonica | NA       |                | Os12g0414900 |                          | Tyrosyl-DNA phosphodiesterase                                               |
| maker-12-augustus-gene-132.40-mRNA-1 | Japonica | Indica   |                | Os12g0416500 | OsR498G1221400300.01.T05 | Biogenesis of lysosome-related organelles complex 1 subunit 1               |
| maker-12-augustus-gene-135.0-mRNA-1  | Japonica | NA       |                | Os12g0420100 | OsR498G1221412500.01.T01 | B-S glucosidase 44                                                          |
| maker-12-augustus-gene-135.2-mRNA-1  | Japonica | NA       |                | Os12g0420200 | OsR498G1221412700.01.T01 | Chloroplast stem-loop binding protein like                                  |
| maker-12-augustus-gene-138.36-mRNA-1 | Japonica | NA       |                | Os01g0284200 | OsR498G0100683700.01.T01 |                                                                             |
| maker-12-augustus-gene-14.0-mRNA-1   | Japonica | NA       |                | Os12g0128700 | OsR498G1220874100.01.T06 | Non-reducing end alpha-L-arabinofuranosidase                                |
| maker-12-augustus-gene-14.14-mRNA-1  | Japonica | NA       |                | Os11g0132600 | OsR498G1119370100.01.T06 | Non-reducing end alpha-L-arabinofuranosidase                                |
| maker-12-augustus-gene-14.18-mRNA-1  | Japonica | NA       |                |              | OsR498G1220876500.01.T01 | Zinc finger, CCCH-type                                                      |
| maker-12-augustus-gene-14.21-mRNA-1  | Japonica | NA       |                |              | OsR498G1220873000.01.T04 | Peroxisomal membrane 22 kDa family protein isoform 2                        |
| maker-12-augustus-gene-14.26-mRNA-1  | Japonica | NA       |                | Os12g0128600 | OsR498G1220874000.01.T02 | Mitochondrial import inner membrane translocase subunit                     |
| maker-12-augustus-gene-14.28-mRNA-1  | Japonica | Japonica |                | Os12g0129000 | OsR498G1220874600.01.T01 | Transmembrane protein 230                                                   |
| maker-12-augustus-gene-14.6-mRNA-1   | Japonica | NA       |                | Os12g0128800 | OsR498G1220874300.01.T01 | Non-reducing end alpha-L-arabinofuranosidase                                |
| maker-12-augustus-gene-15.46-mRNA-1  | Japonica | NA       | Kinase-TM      | Os12g0130200 | OsR498G1220880500.01.T01 | Receptor-like serine/threonine-protein kinase                               |

|                                      |          |          |           |              |                          |                                                                           |
|--------------------------------------|----------|----------|-----------|--------------|--------------------------|---------------------------------------------------------------------------|
| maker-12-augustus-gene-15.49-mRNA-1  | Japonica | NA       |           | Os12g0131200 | OsR498G1220885500.01.T01 | S-acyltransferase                                                         |
| maker-12-augustus-gene-15.54-mRNA-1  | Japonica | Japonica |           | Os12g0131300 | OsR498G1119370400.01.T05 | Aladin                                                                    |
| maker-12-augustus-gene-15.56-mRNA-1  | Japonica | NA       |           | Os12g0131500 |                          | Putative resistance protein (Fragment)                                    |
| maker-12-augustus-gene-15.58-mRNA-1  | Japonica | NA       |           |              |                          |                                                                           |
| maker-12-augustus-gene-15.61-mRNA-1  | Japonica | NA       |           | Os12g0130900 | OsR498G1220884800.01.T01 | X8 domain-containing protein (Fragment)                                   |
| maker-12-augustus-gene-15.62-mRNA-1  | Japonica | NA       |           |              | OsR498G1220885200.01.T01 | Glutamine--fructose-6-phosphate transaminase (isomerizing)                |
| maker-12-augustus-gene-15.71-mRNA-1  | Japonica | Japonica |           | Os12g0131400 | OsR498G1220885800.01.T01 | Glucosamine fructose-6-phosphate aminotransferase1                        |
| maker-12-augustus-gene-15.73-mRNA-1  | Japonica | Indica   |           | Os12g0131600 | OsR498G1220879500.01.T01 | Phloem protein 2-6                                                        |
| maker-12-augustus-gene-151.23-mRNA-1 | Japonica | NA       |           |              | OsR498G1221469100.01.T04 | Acyl-[acyl-carrier-protein]--UDP-N-acetylglucosamine O-acyltransferase    |
| maker-12-augustus-gene-151.27-mRNA-1 | Japonica | NA       |           |              |                          | Serine proteinase inhibitor                                               |
| maker-12-augustus-gene-151.29-mRNA-1 | Japonica | NA       |           | Os12g0438000 | OsR498G1221468200.01.T01 |                                                                           |
| maker-12-augustus-gene-151.31-mRNA-1 | Japonica | NA       |           | Os12g0438100 |                          |                                                                           |
| maker-12-augustus-gene-152.31-mRNA-1 | Japonica | NA       |           | Os12g0438600 | OsR498G1221471600.01.T01 | Chloride channel protein CLC-a                                            |
| maker-12-augustus-gene-152.32-mRNA-1 | Japonica | Indica   |           | Os12g0438600 | OsR498G1221471600.01.T02 | Chloride channel protein CLC-a                                            |
| maker-12-augustus-gene-152.37-mRNA-1 | Japonica | NA       |           |              | OsR498G1221475600.01.T01 |                                                                           |
| maker-12-augustus-gene-154.0-mRNA-1  | Japonica | Indica   |           | Os12g0445200 | OsR498G1221486600.01.T01 | O-methyltransferase ZRP4                                                  |
| maker-12-augustus-gene-154.2-mRNA-1  | Japonica | Indica   |           | Os12g0444800 | OsR498G1221488200.01.T01 | O-methyltransferase ZRP4-like                                             |
| maker-12-augustus-gene-155.18-mRNA-1 | Japonica | NA       |           | Os12g0442800 | OsR498G1221505500.01.T01 | Sulfite oxidase                                                           |
| maker-12-augustus-gene-155.22-mRNA-1 | Japonica | NA       |           | Os12g0442900 | OsR498G1221505100.01.T03 | DET1- and DDB1-associated protein 1                                       |
| maker-12-augustus-gene-156.0-mRNA-1  | Japonica | NA       |           |              |                          | KDEL-tailed cysteine endopeptidase CEP3                                   |
| maker-12-augustus-gene-156.10-mRNA-1 | Japonica | NA       |           |              | OsR498G1221499700.01.T01 | ATPase family AAA domain-containing protein FIGL1                         |
| maker-12-augustus-gene-156.2-mRNA-1  | Japonica | NA       |           | Os12g0443700 | OsR498G1221500100.01.T01 | Prolyl-tRNA synthetase                                                    |
| maker-12-augustus-gene-157.0-mRNA-1  | Japonica | Japonica |           | Os12g0444800 | OsR498G1221494600.01.T01 | O-methyltransferase ZRP4-like                                             |
| maker-12-augustus-gene-157.2-mRNA-1  | Japonica | Japonica |           | Os12g0445200 | OsR498G1221486600.01.T01 | O-methyltransferase ZRP4                                                  |
| maker-12-augustus-gene-158.28-mRNA-1 | Japonica | NA       |           |              | OsR498G1221506900.01.T03 | Bifunctional dihydrofolate reductase-thymidylate synthase                 |
| maker-12-augustus-gene-158.33-mRNA-1 | Japonica | NA       |           | Os12g0446700 | OsR498G1221506800.01.T02 | Autophagy-related protein 101                                             |
| maker-12-augustus-gene-16.0-mRNA-1   | Japonica | NA       | Kinase-TM | Os12g0132200 | OsR498G1119377100.01.T07 | Non-specific serine/threonine protein kinase                              |
| maker-12-augustus-gene-16.11-mRNA-1  | Japonica | NA       |           | Os12g0132300 | OsR498G1220890000.01.T01 | Putative calmodulin-like protein 2                                        |
| maker-12-augustus-gene-16.12-mRNA-1  | Japonica | NA       |           | Os11g0134500 | OsR498G1220890200.01.T02 | Glutamate-rich WD repeat-containing protein 1                             |
| maker-12-augustus-gene-16.19-mRNA-1  | Japonica | NA       |           |              |                          | MFS domain-containing protein                                             |
| maker-12-augustus-gene-16.28-mRNA-1  | Japonica | NA       |           | Os12g0132800 | OsR498G1220890400.01.T05 | Major facilitator superfamily antiporter                                  |
| maker-12-augustus-gene-16.42-mRNA-1  | Japonica | NA       |           | Os12g0133000 | OsR498G1220891200.01.T01 | Major facilitator superfamily antiporter                                  |
| maker-12-augustus-gene-16.47-mRNA-1  | Japonica | Indica   |           | Os08g0130500 | OsR498G1220891400.01.T01 | 60S acidic ribosomal protein P0                                           |
| maker-12-augustus-gene-16.53-mRNA-1  | Japonica | NA       |           | Os11g0135900 | OsR498G1220891600.01.T02 | Transporter, putative, expressed                                          |
| maker-12-augustus-gene-16.6-mRNA-1   | Japonica | NA       |           | Os12g0131900 | OsR498G1220889000.01.T01 | Rhamnogalacturonan endolyase                                              |
| maker-12-augustus-gene-160.0-mRNA-1  | Japonica | NA       |           | Os12g0448900 | OsR498G1221518200.01.T03 | Alpha-dioxygenase, putative, expressed                                    |
| maker-12-augustus-gene-161.29-mRNA-1 | Japonica | NA       |           |              | OsR498G1221520300.01.T01 | Dirigent protein (Fragment)                                               |
| maker-12-augustus-gene-161.32-mRNA-1 | Japonica | NA       |           |              |                          | Retrotransposon protein, putative, unclassified                           |
| maker-12-augustus-gene-166.0-mRNA-1  | Japonica | NA       |           | Os12g0454600 | OsR498G1221535900.01.T01 | Phytoecyanin domain-containing protein (Fragment)                         |
| maker-12-augustus-gene-167.0-mRNA-1  | Japonica | NA       |           |              | OsR498G1221542300.01.T06 | Nuclear pore complex protein NUP1                                         |
| maker-12-augustus-gene-167.3-mRNA-1  | Japonica | NA       |           | Os12g0456200 | OsR498G1221541200.01.T01 | Iron-sulfur cluster co-chaperone protein HscB, mitochondrial              |
| maker-12-augustus-gene-169.0-mRNA-1  | Japonica | Indica   |           | Os12g0458100 | OsR498G1221544200.01.T01 | Acyl transferase 1                                                        |
| maker-12-augustus-gene-169.2-mRNA-1  | Japonica | NA       |           | Os12g0458100 | OsR498G1221546000.01.T01 | Acyl transferase 1                                                        |
| maker-12-augustus-gene-169.4-mRNA-1  | Japonica | NA       |           | Os12g0458100 | OsR498G1221546000.01.T01 | Benzyl alcohol O-benzoyltransferase                                       |
| maker-12-augustus-gene-169.5-mRNA-1  | Japonica | NA       |           |              |                          | Acyl transferase 1                                                        |
| maker-12-augustus-gene-17.27-mRNA-1  | Japonica | Japonica |           | Os12g0518200 | OsR498G1220892100.01.T01 |                                                                           |
| maker-12-augustus-gene-17.30-mRNA-1  | Japonica | NA       |           | Os12g0133400 | OsR498G1220892700.01.T02 | L-aminoadipate-semialdehyde dehydrogenase-phosphopantetheinyl transferase |
| maker-12-augustus-gene-17.34-mRNA-1  | Japonica | Japonica | Kinase-TM | Os12g0133500 | OsR498G1119382300.01.T01 | Calcium-dependent protein kinase                                          |
| maker-12-augustus-gene-17.55-mRNA-1  | Japonica | NA       |           |              |                          | Carbohydrate transporter/ sugar porter/ transporter                       |
| maker-12-augustus-gene-17.58-mRNA-1  | Japonica | NA       |           | Os11g0136701 |                          | Guanine nucleotide-binding protein G(T) subunit alpha-3 like              |
| maker-12-augustus-gene-17.62-mRNA-1  | Japonica | NA       |           | Os12g0133700 | OsR498G1220893400.01.T01 | Protein-tyrosine-phosphatase                                              |
| maker-12-augustus-gene-17.67-mRNA-1  | Japonica | NA       |           | Os11g0137000 | OsR498G1220894000.01.T01 | Auxin efflux carrier component                                            |
| maker-12-augustus-gene-17.69-mRNA-1  | Japonica | NA       |           | Os12g0133900 | OsR498G1220894600.01.T01 | U3 small nucleolar ribonucleoprotein protein MPP10                        |
| maker-12-augustus-gene-170.4-mRNA-1  | Japonica | NA       |           | Os07g0485900 | OsR498G0100084400.01.T01 | Transposon protein, putative, Mutator sub-class                           |
| maker-12-augustus-gene-171.0-mRNA-1  | Japonica | Indica   |           | Os01g0837900 | OsR498G1221553400.01.T03 | Serinethreonine-protein kinase afc2                                       |
| maker-12-augustus-gene-173.36-mRNA-1 | Japonica | NA       |           | Os09g0348800 |                          | Transposon protein, putative, CACTA, En/Spm sub-class, expressed          |
| maker-12-augustus-gene-173.40-mRNA-1 | Japonica | Japonica |           | Os12g0464400 | OsR498G1221563700.01.T01 | 11-beta-hydroxysteroid dehydrogenase-like 5 isoform X1                    |
| maker-12-augustus-gene-173.42-mRNA-1 | Japonica | NA       |           | Os05g0269800 | OsR498G0409509300.01.T01 | DDE Tnp4 domain-containing protein                                        |
| maker-12-augustus-gene-174.0-mRNA-1  | Japonica | Indica   |           | Os12g0465100 | OsR498G1221566500.01.T01 |                                                                           |
| maker-12-augustus-gene-174.2-mRNA-1  | Japonica | NA       |           | Os12g0465100 | OsR498G1221566900.01.T01 | Acetylglucosaminyltransferase family protein                              |
| maker-12-augustus-gene-174.4-mRNA-1  | Japonica | NA       |           |              | OsR498G1221568200.01.T01 | GLTSCR1 domain-containing protein (Fragment)                              |

|                                      |          |          |           |              |                          |                                                                        |
|--------------------------------------|----------|----------|-----------|--------------|--------------------------|------------------------------------------------------------------------|
| maker-12-augustus-gene-176.28-mRNA-1 | Japonica | Indica   |           | Os03g0646300 | OsR498G1221573200.01.T01 | Cyclic nucleotide-gated ion channel 9                                  |
| maker-12-augustus-gene-176.31-mRNA-1 | Japonica | NA       |           | Os12g0468600 | OsR498G1221572900.01.T01 | 5-methylthioadenosine/S-adenosylhomocysteine deaminase-like isoform X1 |
| maker-12-augustus-gene-179.0-mRNA-1  | Japonica | NA       |           | Os12g0471100 | OsR498G1221576100.01.T01 | Adenosinetriphosphatase                                                |
| maker-12-augustus-gene-179.3-mRNA-1  | Japonica | NA       |           | Os12g0472800 | OsR498G1221580600.01.T01 | Pollen-specific protein-like                                           |
| maker-12-augustus-gene-182.24-mRNA-1 | Japonica | Indica   |           | Os11g0508600 | OsR498G1221587200.01.T01 | Bidirectional sugar transporter SWEET                                  |
| maker-12-augustus-gene-183.27-mRNA-1 | Japonica | NA       |           | Os12g0477400 | OsR498G1221589500.01.T01 | NAC domain-containing protein 83                                       |
| maker-12-augustus-gene-183.29-mRNA-1 | Japonica | NA       |           |              | OsR498G1221591100.01.T01 | Neprosin domain-containing protein                                     |
| maker-12-augustus-gene-183.31-mRNA-1 | Japonica | NA       |           | Os12g0477600 |                          | Putative ribosomal protein L31                                         |
| maker-12-augustus-gene-183.33-mRNA-1 | Japonica | NA       |           |              | OsR498G1221590800.01.T02 | DNA binding,ATP binding protein                                        |
| maker-12-augustus-gene-184.25-mRNA-1 | Japonica | Indica   |           | Os09g0466300 | OsR498G1221591800.01.T01 | GRAM domain-containing protein / ABA-responsive                        |
| maker-12-augustus-gene-184.27-mRNA-1 | Japonica | NA       |           | Os12g0479100 | OsR498G1221596400.01.T01 | Extensin isoform X1                                                    |
| maker-12-augustus-gene-185.18-mRNA-1 | Japonica | NA       |           | Os12g0479900 | OsR498G1221601700.01.T01 | Aminopeptidase                                                         |
| maker-12-augustus-gene-185.24-mRNA-1 | Japonica | NA       |           |              |                          | S-acyltransferase                                                      |
| maker-12-augustus-gene-185.29-mRNA-1 | Japonica | NA       |           | Os12g0480100 | OsR498G1221602100.01.T02 | High-light-induced protein chloroplastic                               |
| maker-12-augustus-gene-185.32-mRNA-1 | Japonica | NA       |           | Os11g0523800 | OsR498G1120245800.01.T03 | Auxin response factor                                                  |
| maker-12-augustus-gene-185.37-mRNA-1 | Japonica | Indica   | Kinase    | Os12g0480200 | OsR498G1221602400.01.T01 | Serine/threonine-protein kinase KIPK                                   |
| maker-12-augustus-gene-186.37-mRNA-1 | Japonica | Indica   |           | Os12g0481200 | OsR498G1221605700.01.T01 | Putative Histone-lysine N-methyltransferase SUV420H14-20               |
| maker-12-augustus-gene-186.42-mRNA-1 | Japonica | Indica   |           | Os11g0543300 | OsR498G1221605200.01.T01 |                                                                        |
| maker-12-augustus-gene-186.44-mRNA-1 | Japonica | NA       |           | Os12g0481100 | OsR498G1221605600.01.T01 | DEAD-box ATP-dependent RNA helicase                                    |
| maker-12-augustus-gene-186.49-mRNA-1 | Japonica | Japonica |           | Os12g0482500 | OsR498G1221614600.01.T01 | GTD-binding domain-containing protein (Fragment)                       |
| maker-12-augustus-gene-187.37-mRNA-1 | Japonica | NA       |           | Os12g0482700 | OsR498G1221615000.01.T01 | L-galactose dehydrogenase                                              |
| maker-12-augustus-gene-188.13-mRNA-1 | Japonica | NA       |           | Os12g0485000 | OsR498G1221621600.01.T02 | Probable tRNA N6-adenosine threonylcarbamoyltransferase, mitochondrial |
| maker-12-augustus-gene-188.18-mRNA-1 | Japonica | NA       |           | Os12g0485500 | OsR498G1221623000.01.T01 | Iron-sulfur assembly protein IscA-like 1 mitochondrial                 |
| maker-12-augustus-gene-188.2-mRNA-1  | Japonica | NA       |           | Os12g0485400 | OsR498G1221622500.01.T02 | Cyclin-T1-5 like                                                       |
| maker-12-augustus-gene-188.20-mRNA-1 | Japonica | NA       |           | Os12g0485600 | OsR498G1221624200.01.T01 | Lysine histidine transporter-like protein 8                            |
| maker-12-augustus-gene-188.7-mRNA-1  | Japonica | NA       |           | Os12g0484700 | OsR498G1221620800.01.T01 | Yippee domain-containing protein                                       |
| maker-12-augustus-gene-189.12-mRNA-1 | Japonica | Japonica | CC-NBS-TM | Os12g0485900 | OsR498G1221625000.01.T01 | NB-ARC domain, putative                                                |
| maker-12-augustus-gene-19.52-mRNA-1  | Japonica | NA       |           | Os08g0343300 | OsR498G1119384700.01.T01 | Transcription initiation factor IIE subunit alpha                      |
| maker-12-augustus-gene-19.53-mRNA-1  | Japonica | NA       |           |              | OsR498G1119384700.01.T01 | Transcription initiation factor IIE subunit alpha                      |
| maker-12-augustus-gene-19.56-mRNA-1  | Japonica | NA       |           | Os12g0136200 | OsR498G1220899700.01.T01 | Heterogeneous nuclear ribonucleoprotein Q                              |
| maker-12-augustus-gene-19.62-mRNA-1  | Japonica | Indica   |           | Os11g0137300 | OsR498G1220895400.01.T01 | proteasome-associated protein ECM29 homolog                            |
| maker-12-augustus-gene-19.73-mRNA-1  | Japonica | NA       |           |              |                          | Phosphoglycerate mutase family protein, expressed                      |
| maker-12-augustus-gene-19.78-mRNA-1  | Japonica | NA       |           | Os11g0138600 | OsR498G1220897400.01.T02 | Phosphoglycerate mutase gpmB                                           |
| maker-12-augustus-gene-19.83-mRNA-1  | Japonica | NA       |           | Os11g0139100 | OsR498G1220899400.01.T01 | KOW domain-containing protein                                          |
| maker-12-augustus-gene-190.28-mRNA-1 | Japonica | NA       |           | Os12g0486600 | OsR498G1221633300.01.T01 | Nuclear pore complex protein NUP1-like                                 |
| maker-12-augustus-gene-190.29-mRNA-1 | Japonica | NA       |           | Os12g0486600 | OsR498G1221633300.01.T01 | Calcium-dependent calmodulin-independent protein kinase                |
| maker-12-augustus-gene-190.35-mRNA-1 | Japonica | Japonica | Kinase-TM | Os12g0486900 | OsR498G1221633900.01.T01 | receptor-like serine/threonine-protein kinase ALE2 isoform X2          |
| maker-12-augustus-gene-192.30-mRNA-1 | Japonica | Japonica |           | Os12g0488600 | OsR498G1120417100.01.T01 | 50S ribosomal protein L4                                               |
| maker-12-augustus-gene-192.32-mRNA-1 | Japonica | NA       |           | Os12g0488700 | OsR498G1221645100.01.T01 | Myosin-binding protein 7                                               |
| maker-12-augustus-gene-192.34-mRNA-1 | Japonica | NA       |           |              | OsR498G1221646900.01.T05 | Ubiquitinyl hydrolase 1                                                |
| maker-12-augustus-gene-192.41-mRNA-1 | Japonica | NA       |           |              | OsR498G1119369600.01.T06 | PMEL domain-containing protein                                         |
| maker-12-augustus-gene-192.43-mRNA-1 | Japonica | NA       |           |              |                          | DNA-directed RNA polymerase III subunit RPC9                           |
| maker-12-augustus-gene-192.50-mRNA-1 | Japonica | NA       |           | Os12g0489300 | OsR498G1221647600.01.T01 | Putative DNA/RNA-binding protein Alba                                  |
| maker-12-augustus-gene-194.20-mRNA-1 | Japonica | NA       |           | Os12g0492900 |                          | F-box domain containing protein, expressed                             |
| maker-12-augustus-gene-194.22-mRNA-1 | Japonica | Indica   |           | Os12g0491800 | OsR498G1221651000.01.T01 | Kaurene synthase3                                                      |
| maker-12-augustus-gene-194.24-mRNA-1 | Japonica | NA       |           | Os12g0491800 | OsR498G1221651400.01.T02 | Ent-kaurene synthase like 4                                            |
| maker-12-augustus-gene-195.41-mRNA-1 | Japonica | NA       |           | Os12g0493900 | OsR498G1221652500.01.T01 | Maternal protein pumilio                                               |
| maker-12-augustus-gene-195.44-mRNA-1 | Japonica | NA       |           | Os10g0199200 | OsR498G1018346900.01.T03 |                                                                        |
| maker-12-augustus-gene-196.0-mRNA-1  | Japonica | NA       | CC-NBS-TM | Os12g0495600 | OsR498G1221658200.01.T01 | Putative CC-NBS-LRR resistance protein MLA13                           |
| maker-12-augustus-gene-197.0-mRNA-1  | Japonica | NA       | NBS-TM    |              | OsR498G1221658300.01.T01 | NB-ARC domain containing protein, expressed                            |
| maker-12-augustus-gene-197.2-mRNA-1  | Japonica | NA       |           |              |                          | Phototropic-responsive NPH3 family protein                             |
| maker-12-augustus-gene-197.3-mRNA-1  | Japonica | NA       |           |              | OsR498G1221660800.01.T01 | FBD domain-containing protein (Fragment)                               |
| maker-12-augustus-gene-197.5-mRNA-1  | Japonica | NA       |           | Os12g0496900 | OsR498G1221661000.01.T01 | GRF1-interacting factor 3 isoform B                                    |
| maker-12-augustus-gene-197.8-mRNA-1  | Japonica | Indica   |           | Os12g0497400 | OsR498G1221661600.01.T01 | elf-2B GDP-GTP exchange factor subunit alpha                           |
| maker-12-augustus-gene-198.0-mRNA-1  | Japonica | NA       |           |              |                          | BHLH domain-containing protein (Fragment)                              |
| maker-12-augustus-gene-198.11-mRNA-1 | Japonica | NA       |           | Os12g0498700 | OsR498G1221664300.01.T01 | GPI mannosyltransferase 2                                              |
| maker-12-augustus-gene-198.18-mRNA-1 | Japonica | NA       |           | Os12g0498400 | OsR498G1221663000.01.T02 | Plastid division regulator MinE                                        |
| maker-12-augustus-gene-198.2-mRNA-1  | Japonica | Indica   |           | Os05g0482600 | OsR498G1221662700.01.T01 |                                                                        |
| maker-12-augustus-gene-198.20-mRNA-1 | Japonica | NA       |           |              | OsR498G1221663400.01.T01 | NADPH-quinone oxidoreductase subunit U, chloroplastic                  |
| maker-12-augustus-gene-198.24-mRNA-1 | Japonica | NA       |           | Os12g0498800 | OsR498G1221665000.01.T01 |                                                                        |
| maker-12-augustus-gene-199.0-mRNA-1  | Japonica | NA       |           | Os12g0500700 | OsR498G1221667300.01.T05 | Vacuolar protein sorting-associated protein 26                         |

|                                      |          |          |           |              |                          |                                                                           |
|--------------------------------------|----------|----------|-----------|--------------|--------------------------|---------------------------------------------------------------------------|
| maker-12-augustus-gene-2.66-mRNA-1   | Japonica | NA       |           | Os12g0104300 | OsR498G1220794300.01.T01 | Double CLP-N motif-containing P-loop nucleoside triphosphate hydrolases s |
| maker-12-augustus-gene-20.40-mRNA-1  | Japonica | NA       |           | Os12g0136900 | OsR498G1220901700.01.T01 | Calcium-transporting ATPase                                               |
| maker-12-augustus-gene-20.46-mRNA-1  | Japonica | NA       |           |              | OsR498G1220903100.01.T07 | Kallikrein-2 like                                                         |
| maker-12-augustus-gene-20.55-mRNA-1  | Japonica | Indica   |           | Os11g0140900 | OsR498G1220903700.01.T01 | Bromodomain-containing protein                                            |
| maker-12-augustus-gene-20.57-mRNA-1  | Japonica | NA       |           | Os12g0137500 | OsR498G1220904300.01.T01 | PP2A regulatory subunit like                                              |
| maker-12-augustus-gene-20.65-mRNA-1  | Japonica | NA       |           | Os11g0141900 | OsR498G1220907100.01.T01 | BTB/POZ domain and ankyrin repeat-containing protein NH5.2                |
| maker-12-augustus-gene-20.68-mRNA-1  | Japonica | Indica   |           | Os11g0140100 | OsR498G1220901400.01.T01 | Mitochondrial acidic protein mam33                                        |
| maker-12-augustus-gene-20.71-mRNA-1  | Japonica | Indica   |           | Os12g0137100 | OsR498G1220902400.01.T01 | probable calcium-binding protein CML49                                    |
| maker-12-augustus-gene-20.76-mRNA-1  | Japonica | NA       |           |              | OsR498G1220903400.01.T01 | Cytochrome c-type biogenesis ccda chloroplastic protein isoform 1         |
| maker-12-augustus-gene-200.27-mRNA-1 | Japonica | NA       |           | Os08g0402700 |                          | ZF-HD dimerization-type domain-containing protein                         |
| maker-12-augustus-gene-200.32-mRNA-1 | Japonica | NA       |           | Os12g0502500 | OsR498G1221671900.01.T01 | Nitrilase-like protein 2 isoform A                                        |
| maker-12-augustus-gene-200.35-mRNA-1 | Japonica | NA       |           | Os12g0502700 | OsR498G1221672300.01.T02 | DnaJ domain containing protein, expressed                                 |
| maker-12-augustus-gene-200.38-mRNA-1 | Japonica | Japonica |           | Os12g0501400 | OsR498G1221669000.01.T02 | Usp domain-containing protein (Fragment)                                  |
| maker-12-augustus-gene-200.41-mRNA-1 | Japonica | Japonica |           | Os12g0501700 | OsR498G1221669400.01.T01 | Agamous-like MADS-box protein AGL8                                        |
| maker-12-augustus-gene-200.45-mRNA-1 | Japonica | NA       |           | Os12g0502000 | OsR498G1221670000.01.T02 | Non-structural polyprotein 1AB                                            |
| maker-12-augustus-gene-200.47-mRNA-1 | Japonica | NA       |           | Os12g0502100 |                          | SKIP interacting protein 15                                               |
| maker-12-augustus-gene-200.50-mRNA-1 | Japonica | NA       |           | Os12g0502300 | OsR498G1221671000.01.T01 | Cyclin N-terminal domain-containing protein                               |
| maker-12-augustus-gene-200.54-mRNA-1 | Japonica | NA       |           | Os12g0502400 | OsR498G1221671600.01.T01 | O-phosphoserine phosphohydrolase                                          |
| maker-12-augustus-gene-200.62-mRNA-1 | Japonica | NA       |           | Os12g0502800 | OsR498G1221672600.01.T01 | Ureide permease                                                           |
| maker-12-augustus-gene-201.28-mRNA-1 | Japonica | NA       |           |              | OsR498G1221673100.01.T04 | Translation initiation factor                                             |
| maker-12-augustus-gene-201.31-mRNA-1 | Japonica | NA       |           | Os12g0503000 | OsR498G1221672800.01.T02 | Ureide permease                                                           |
| maker-12-augustus-gene-201.38-mRNA-1 | Japonica | NA       |           | Os12g0503300 |                          | Ureide permease                                                           |
| maker-12-augustus-gene-203.0-mRNA-1  | Japonica | NA       |           | Os12g0506700 | OsR498G1221685500.01.T01 |                                                                           |
| maker-12-augustus-gene-203.12-mRNA-1 | Japonica | NA       |           | Os12g0507200 | OsR498G1221687500.01.T01 | Eukaryotic translation initiation factor 5A                               |
| maker-12-augustus-gene-203.16-mRNA-1 | Japonica | NA       |           | Os12g0507300 | OsR498G1221688500.01.T01 | WRKY domain class transcription factor                                    |
| maker-12-augustus-gene-203.20-mRNA-1 | Japonica | NA       |           | Os03g0666200 | OsR498G1119668000.01.T01 | differentially expressed in FDCP 6 homolog isoform X1                     |
| maker-12-augustus-gene-203.9-mRNA-1  | Japonica | NA       |           | Os12g0507000 | OsR498G1221686500.01.T07 | GTP 3',8-cyclase                                                          |
| maker-12-augustus-gene-204.34-mRNA-1 | Japonica | NA       |           |              | OsR498G1221689700.01.T08 | Protein TRIGALACTOSYLDIACYLGLYCEROL 5 chloroplastic                       |
| maker-12-augustus-gene-204.36-mRNA-1 | Japonica | NA       |           | Os12g0507900 |                          | DUF223 domain-containing protein                                          |
| maker-12-augustus-gene-204.39-mRNA-1 | Japonica | Japonica |           | Os12g0508100 | OsR498G1221690700.01.T01 | Peroxisomal membrane protein MPV17                                        |
| maker-12-augustus-gene-204.41-mRNA-1 | Japonica | NA       |           |              | OsR498G1221691900.01.T01 | Ribosomal protein S14p/S29e containing protein, expressed                 |
| maker-12-augustus-gene-204.43-mRNA-1 | Japonica | NA       |           |              | OsR498G1221692700.01.T01 | Transcription factor bHLH85 like                                          |
| maker-12-augustus-gene-204.46-mRNA-1 | Japonica | NA       |           |              | OsR498G1221689600.01.T02 | SWIB domain-containing protein                                            |
| maker-12-augustus-gene-204.49-mRNA-1 | Japonica | NA       |           | Os12g0507700 |                          |                                                                           |
| maker-12-augustus-gene-204.51-mRNA-1 | Japonica | NA       |           | Os12g0508200 | OsR498G1221691000.01.T01 |                                                                           |
| maker-12-augustus-gene-204.53-mRNA-1 | Japonica | NA       |           | Os12g0508266 | OsR498G1221691800.01.T01 | UBP-type domain-containing protein (Fragment)                             |
| maker-12-augustus-gene-204.55-mRNA-1 | Japonica | NA       |           | Os12g0508900 |                          |                                                                           |
| maker-12-augustus-gene-205.0-mRNA-1  | Japonica | NA       |           |              |                          |                                                                           |
| maker-12-augustus-gene-205.13-mRNA-1 | Japonica | Japonica |           | Os12g0509300 | OsR498G1221697300.01.T01 |                                                                           |
| maker-12-augustus-gene-205.16-mRNA-1 | Japonica | NA       |           |              | OsR498G1221699600.01.T05 |                                                                           |
| maker-12-augustus-gene-205.18-mRNA-1 | Japonica | NA       |           | Os12g0510200 |                          | No pollen germination related 1                                           |
| maker-12-augustus-gene-205.3-mRNA-1  | Japonica | NA       |           | Os12g0509600 |                          |                                                                           |
| maker-12-augustus-gene-205.5-mRNA-1  | Japonica | NA       |           | Os12g0510000 |                          |                                                                           |
| maker-12-augustus-gene-205.9-mRNA-1  | Japonica | NA       |           |              | OsR498G1221702100.01.T01 | Transcription factor LIM                                                  |
| maker-12-augustus-gene-206.21-mRNA-1 | Japonica | Japonica |           | Os12g0511200 | OsR498G1221702900.01.T01 | Heptahelical transmembrane protein 5                                      |
| maker-12-augustus-gene-206.23-mRNA-1 | Japonica | NA       |           | Os12g0511300 | OsR498G1221703100.01.T02 | CRT-like domain-containing protein (Fragment)                             |
| maker-12-augustus-gene-206.26-mRNA-1 | Japonica | NA       |           |              | OsR498G1221702600.01.T01 | F-box domain containing protein, expressed                                |
| maker-12-augustus-gene-206.28-mRNA-1 | Japonica | NA       | NBS-TM    | Os12g0511400 | OsR498G1221703400.01.T01 | NB-ARC domain containing protein, expressed                               |
| maker-12-augustus-gene-206.31-mRNA-1 | Japonica | NA       | CC-NBS-TM |              | OsR498G1221703800.01.T01 | NB-ARC domain containing protein, expressed                               |
| maker-12-augustus-gene-206.34-mRNA-1 | Japonica | Indica   | CC-NBS-TM | Os12g0511400 | OsR498G1221704000.01.T02 | NB-ARC domain containing protein, expressed                               |
| maker-12-augustus-gene-206.36-mRNA-1 | Japonica | NA       | NBS-TM    |              |                          | NB-ARC domain containing protein, expressed                               |
| maker-12-augustus-gene-207.32-mRNA-1 | Japonica | Japonica |           | Os12g0512000 | OsR498G1221704700.01.T01 | Flavin-containing monooxygenase                                           |
| maker-12-augustus-gene-207.34-mRNA-1 | Japonica | NA       |           | Os12g0512200 |                          | Transposon protein, putative, Mariner sub-class                           |
| maker-12-augustus-gene-207.37-mRNA-1 | Japonica | NA       | NBS-TM    |              | OsR498G1221704200.01.T01 | NB-ARC domain containing protein, expressed                               |
| maker-12-augustus-gene-207.55-mRNA-1 | Japonica | Indica   |           | Os03g0850200 | OsR498G1221706400.01.T01 | 4-hydroxyphenylacetaldehyde oxime monooxygenase                           |
| maker-12-augustus-gene-208.39-mRNA-1 | Japonica | NA       |           |              |                          | Mitochondrial inner membrane translocase subunit                          |
| maker-12-augustus-gene-208.41-mRNA-1 | Japonica | NA       |           | Os12g0514000 | OsR498G1221708200.01.T01 | Polyol transporter 5                                                      |
| maker-12-augustus-gene-208.43-mRNA-1 | Japonica | NA       |           |              | OsR498G1221709000.01.T01 | Stress-associated endoplasmic reticulum protein 2                         |
| maker-12-augustus-gene-208.46-mRNA-1 | Japonica | NA       |           |              | OsR498G1221710000.01.T02 | PHD domain-containing protein (Fragment)                                  |
| maker-12-augustus-gene-208.48-mRNA-1 | Japonica | NA       |           | Os12g0514500 | OsR498G1221710800.01.T01 | Heat shock protein 90-6 mitochondrial                                     |
| maker-12-augustus-gene-208.54-mRNA-1 | Japonica | NA       |           | Os12g0514600 | OsR498G1221711000.01.T01 | SAM domain-containing protein (Fragment)                                  |

|                                      |          |          |               |              |                          |                                                                      |
|--------------------------------------|----------|----------|---------------|--------------|--------------------------|----------------------------------------------------------------------|
| maker-12-augustus-gene-209.28-mRNA-1 | Japonica | NA       |               | Os12g0515300 | OsR498G1221715000.01.T01 | Transcription factor like                                            |
| maker-12-augustus-gene-21.50-mRNA-1  | Japonica | NA       |               | Os12g0138800 | OsR498G1220908500.01.T01 | Dimethylnonatriene synthase                                          |
| maker-12-augustus-gene-21.52-mRNA-1  | Japonica | Indica   |               | Os11g0142400 | OsR498G1220908900.01.T01 | Strictosidine synthase                                               |
| maker-12-augustus-gene-21.55-mRNA-1  | Japonica | NA       |               | Os12g0138900 | OsR498G1220909100.01.T02 | 2-isopropylmalate synthase 1 chloroplastic                           |
| maker-12-augustus-gene-21.65-mRNA-1  | Japonica | NA       |               |              |                          | MFS domain-containing protein (Fragment)                             |
| maker-12-augustus-gene-21.67-mRNA-1  | Japonica | NA       |               | Os12g0139300 | OsR498G1220910200.01.T01 | CPD brassinosteroid C-23 hydroxylase                                 |
| maker-12-augustus-gene-21.70-mRNA-1  | Japonica | NA       |               | Os12g0139500 | OsR498G1220911200.01.T01 | RNA polymerase Rpb5, N-terminal domain containing protein, expressed |
| maker-12-augustus-gene-21.73-mRNA-1  | Japonica | NA       |               | Os11g0143500 | OsR498G1220911800.01.T01 | Mitochondrial L-galactono-1,4-lactone dehydrogenase                  |
| maker-12-augustus-gene-21.78-mRNA-1  | Japonica | NA       |               |              |                          | Transcription initiation factor IIE subunit alpha                    |
| maker-12-augustus-gene-21.84-mRNA-1  | Japonica | Japonica |               | Os12g0140300 | OsR498G1220913400.01.T01 |                                                                      |
| maker-12-augustus-gene-216.57-mRNA-1 | Japonica | Indica   |               | Os01g0375200 | OsR498G1221758000.01.T05 | Shikimate biosynthesis protein aroDE                                 |
| maker-12-augustus-gene-22.34-mRNA-1  | Japonica | NA       |               |              | OsR498G1119556100.01.T01 | Transposon mutator sub-class                                         |
| maker-12-augustus-gene-22.37-mRNA-1  | Japonica | NA       |               | Os12g0141100 | OsR498G1220916400.01.T02 | Phosphatidylinositol 4-phosphate 5-kinase                            |
| maker-12-augustus-gene-22.39-mRNA-1  | Japonica | Indica   |               | Os01g0776500 | OsR498G1220917600.01.T01 |                                                                      |
| maker-12-augustus-gene-220.24-mRNA-1 | Japonica | Indica   |               | Os12g0540700 | OsR498G1221784900.01.T02 | Dynein beta chain, ciliary protein                                   |
| maker-12-augustus-gene-220.27-mRNA-1 | Japonica | NA       |               | Os12g0540800 | OsR498G1221784900.01.T04 | Acyl-CoA-binding domain-containing protein 4-like isoform X2         |
| maker-12-augustus-gene-220.41-mRNA-1 | Japonica | NA       |               | Os12g0541500 | OsR498G1221787900.01.T03 | Elongation factor Ts, mitochondrial                                  |
| maker-12-augustus-gene-220.43-mRNA-1 | Japonica | NA       |               | Os12g0540900 | OsR498G1221785200.01.T01 | Tryptophanyl-tRNA synthetase                                         |
| maker-12-augustus-gene-226.8-mRNA-1  | Japonica | NA       |               |              |                          |                                                                      |
| maker-12-augustus-gene-228.36-mRNA-1 | Japonica | NA       |               | Os12g0553900 | OsR498G1221857500.01.T01 | splicing regulatory glutamine/lysine-rich protein 1                  |
| maker-12-augustus-gene-228.50-mRNA-1 | Japonica | NA       |               | Os12g0516800 | OsR498G1221857800.01.T03 | Trichome birefringence-like 16                                       |
| maker-12-augustus-gene-229.17-mRNA-1 | Japonica | NA       |               | Os12g0556300 | OsR498G1221865700.01.T02 | Calmodulin-binding protein, putative, expressed                      |
| maker-12-augustus-gene-229.19-mRNA-1 | Japonica | Japonica |               | Os12g0556400 | OsR498G1221865900.01.T02 | Putative Magnesium transporter                                       |
| maker-12-augustus-gene-229.21-mRNA-1 | Japonica | NA       |               | Os12g0556500 | OsR498G1221866100.01.T02 | Calmodulin-binding protein, putative, expressed                      |
| maker-12-augustus-gene-229.25-mRNA-1 | Japonica | Indica   |               | Os06g0336500 | OsR498G1221863800.01.T01 | Cellulose synthase-like protein D4                                   |
| maker-12-augustus-gene-229.27-mRNA-1 | Japonica | NA       |               | Os12g0556600 | OsR498G1221866400.01.T01 | CTP synthase                                                         |
| maker-12-augustus-gene-229.4-mRNA-1  | Japonica | Japonica |               | Os12g0555400 | OsR498G1221863300.01.T01 | Galactinol-raffinose galactosyltransferase                           |
| maker-12-augustus-gene-229.6-mRNA-1  | Japonica | NA       |               | Os12g0555500 | OsR498G1221863500.01.T01 | Major allergen Api g 1, isoallergen 1-like                           |
| maker-12-augustus-gene-23.0-mRNA-1   | Japonica | NA       |               | Os12g0143200 | OsR498G1220920500.01.T01 | Set1/Ash2 histone methyltransferase complex subunit ASH2             |
| maker-12-augustus-gene-23.14-mRNA-1  | Japonica | NA       |               | Os12g0143800 | OsR498G1220924800.01.T03 | DNA meiotic recombinase 1                                            |
| maker-12-augustus-gene-23.19-mRNA-1  | Japonica | NA       |               | Os12g0143900 | OsR498G1220925600.01.T03 | Long chain acyl-CoA synthetase 6 peroxisomal                         |
| maker-12-augustus-gene-23.2-mRNA-1   | Japonica | Indica   |               | Os11g0147100 | OsR498G1220925900.01.T01 | R3H-associated N-terminal domain-containing protein                  |
| maker-12-augustus-gene-23.7-mRNA-1   | Japonica | Japonica |               | Os12g0143400 | OsR498G1119407400.01.T02 | Suppressor of mec-8 and unc-52 protein 2                             |
| maker-12-augustus-gene-230.0-mRNA-1  | Japonica | NA       |               | Os12g0557900 | OsR498G1221868900.01.T02 | FBD domain-containing protein (Fragment)                             |
| maker-12-augustus-gene-230.3-mRNA-1  | Japonica | NA       |               | Os12g0557400 | OsR498G1221867600.01.T01 | Transmembrane protein 205                                            |
| maker-12-augustus-gene-231.30-mRNA-1 | Japonica | NA       |               | Os12g0559200 | OsR498G1221874400.01.T02 | Lipoxygenase                                                         |
| maker-12-augustus-gene-231.39-mRNA-1 | Japonica | NA       | CC-NBS-TM     | Os12g0559500 | OsR498G1221875800.01.T01 | Disease resistance protein RPP13                                     |
| maker-12-augustus-gene-232.31-mRNA-1 | Japonica | Indica   |               | Os12g0559200 | OsR498G1221876500.01.T01 | Lipoxygenase                                                         |
| maker-12-augustus-gene-232.38-mRNA-1 | Japonica | NA       |               | Os12g0560400 | OsR498G1221877300.01.T01 | DNA-directed RNA polymerase subunit                                  |
| maker-12-augustus-gene-232.41-mRNA-1 | Japonica | NA       |               | Os12g0560600 | OsR498G1221877900.01.T01 | Ubiquitin-conjugating enzyme E2 37                                   |
| maker-12-augustus-gene-232.44-mRNA-1 | Japonica | NA       |               | Os12g0560300 | OsR498G1221877200.01.T01 | GTP-binding protein SAR1A                                            |
| maker-12-augustus-gene-232.47-mRNA-1 | Japonica | NA       |               | Os12g0560500 | OsR498G1221877800.01.T01 | RNA pseudourine synthase 1                                           |
| maker-12-augustus-gene-232.49-mRNA-1 | Japonica | NA       |               | Os12g0560700 | OsR498G1221878200.01.T02 | DNA replication licensing factor MCM7                                |
| maker-12-augustus-gene-232.53-mRNA-1 | Japonica | Indica   |               | Os12g0561000 | OsR498G1221879000.01.T01 | Cytochrome c oxidase polypeptide Vc                                  |
| maker-12-augustus-gene-232.55-mRNA-1 | Japonica | Indica   |               | Os12g0561200 | OsR498G1221879200.01.T02 | PAPA-1 domain-containing protein (Fragment)                          |
| maker-12-augustus-gene-233.0-mRNA-1  | Japonica | Indica   |               | Os12g0562000 | OsR498G1221881500.01.T02 |                                                                      |
| maker-12-augustus-gene-233.2-mRNA-1  | Japonica | NA       |               |              | OsR498G1221882700.01.T03 | Smr domain-containing protein (Fragment)                             |
| maker-12-augustus-gene-233.24-mRNA-1 | Japonica | NA       |               | Os12g0562100 | OsR498G1221882000.01.T04 | Solute carrier family 40 member 2, chloroplastic                     |
| maker-12-augustus-gene-234.53-mRNA-1 | Japonica | NA       |               | Os12g0563000 | OsR498G1221886900.01.T01 | PlsC domain-containing protein (Fragment)                            |
| maker-12-augustus-gene-234.75-mRNA-1 | Japonica | Japonica | CC-NBS-TM     | Os12g0565100 | OsR498G1221893300.01.T01 | NB-ARC domain containing protein, expressed                          |
| maker-12-augustus-gene-234.79-mRNA-1 | Japonica | NA       |               | Os12g0563700 | OsR498G1221889200.01.T01 | Pectinesterase                                                       |
| maker-12-augustus-gene-234.83-mRNA-1 | Japonica | NA       |               |              | OsR498G1221890200.01.T01 | Transcription factor MYB21                                           |
| maker-12-augustus-gene-234.92-mRNA-1 | Japonica | NA       | NBS-TM        | Os12g0564800 | OsR498G1221892000.01.T02 | NB-ARC domain containing protein expressed                           |
| maker-12-augustus-gene-235.0-mRNA-1  | Japonica | NA       | CC-LRR-NBS-TM | Os12g0565200 | OsR498G1221893900.01.T01 | NB-ARC domain containing protein, expressed                          |
| maker-12-augustus-gene-235.10-mRNA-1 | Japonica | NA       |               |              | OsR498G1221895700.01.T01 | Modifier of snc1                                                     |
| maker-12-augustus-gene-235.13-mRNA-1 | Japonica | NA       |               | Os12g0566300 | OsR498G1221895900.01.T03 | ATP citrate synthase                                                 |
| maker-12-augustus-gene-235.17-mRNA-1 | Japonica | Indica   |               | Os12g0566400 | OsR498G1221896100.01.T02 | Membrane magnesium transporter                                       |
| maker-12-augustus-gene-235.20-mRNA-1 | Japonica | NA       |               | Os12g0565300 | OsR498G1221894200.01.T01 | Calmodulin-binding protein MPCBP                                     |
| maker-12-augustus-gene-235.25-mRNA-1 | Japonica | Indica   |               | Os12g0566100 | OsR498G1221895200.01.T01 | LYR motif-containing 5A                                              |
| maker-12-augustus-gene-235.3-mRNA-1  | Japonica | NA       |               | Os12g0566000 | OsR498G1221894900.01.T01 | Boron transporter like                                               |
| maker-12-augustus-gene-236.44-mRNA-1 | Japonica | NA       |               |              |                          |                                                                      |

|                                      |          |          |               |              |                          |                                                                   |
|--------------------------------------|----------|----------|---------------|--------------|--------------------------|-------------------------------------------------------------------|
| maker-12-augustus-gene-236.51-mRNA-1 | Japonica | NA       |               |              | OsR498G1221897500.01.T04 | Diaminopimelate epimerase                                         |
| maker-12-augustus-gene-236.56-mRNA-1 | Japonica | NA       |               | Os12g0567700 | OsR498G1221900900.01.T01 | Large subunit ribosomal protein L8e                               |
| maker-12-augustus-gene-236.58-mRNA-1 | Japonica | Indica   |               | Os12g0566700 | OsR498G1221896800.01.T01 | GDSL-like Lipase/Acylhydrolase family protein, expressed          |
| maker-12-augustus-gene-236.61-mRNA-1 | Japonica | NA       |               | Os12g0566900 | OsR498G1221897000.01.T03 |                                                                   |
| maker-12-augustus-gene-236.63-mRNA-1 | Japonica | Indica   |               | Os12g0566800 | OsR498G1221897000.01.T02 | Putative Ion channel regulatory protein, UNC-93                   |
| maker-12-augustus-gene-236.67-mRNA-1 | Japonica | Indica   |               | Os12g0566900 | OsR498G1221897200.01.T01 | Putative Ion channel regulatory protein, UNC-93                   |
| maker-12-augustus-gene-236.68-mRNA-1 | Japonica | NA       |               | Os12g0566900 | OsR498G1221897200.01.T06 | Ion channel regulatory protein                                    |
| maker-12-augustus-gene-236.77-mRNA-1 | Japonica | NA       |               | Os12g0567300 | OsR498G1221897800.01.T01 | Myb-related protein MYBAS2                                        |
| maker-12-augustus-gene-236.80-mRNA-1 | Japonica | Japonica | Kinase-LRR-TM | Os12g0567500 | OsR498G1221899800.01.T01 | Expressed protein kinase                                          |
| maker-12-augustus-gene-236.82-mRNA-1 | Japonica | NA       |               | Os12g0567800 | OsR498G1221901200.01.T01 | Metallothionein-like protein 1, putative, expressed               |
| maker-12-augustus-gene-237.33-mRNA-1 | Japonica | NA       |               | Os12g0568700 | OsR498G1221903300.01.T01 |                                                                   |
| maker-12-augustus-gene-237.35-mRNA-1 | Japonica | NA       |               | Os12g0568800 | OsR498G1221903700.01.T01 | Importin subunit beta-1 like                                      |
| maker-12-augustus-gene-237.37-mRNA-1 | Japonica | Japonica |               | Os12g0569700 | OsR498G0306484600.01.T01 | Non-cell-autonomous heat shock cognate protein 70                 |
| maker-12-augustus-gene-237.41-mRNA-1 | Japonica | NA       |               | Os12g0570000 | OsR498G1221907400.01.T01 | RING-type E3 ubiquitin transferase                                |
| maker-12-augustus-gene-238.0-mRNA-1  | Japonica | NA       |               | Os12g0570400 | OsR498G1221909300.01.T02 |                                                                   |
| maker-12-augustus-gene-238.10-mRNA-1 | Japonica | NA       |               | Os12g0571100 | OsR498G1221910900.01.T01 | Metallothionein-like protein 1, putative, expressed               |
| maker-12-augustus-gene-238.13-mRNA-1 | Japonica | NA       |               | Os12g0571200 | OsR498G1221911300.01.T01 | Mitochondrial import inner membrane translocase subunit Tim9 like |
| maker-12-augustus-gene-238.15-mRNA-1 | Japonica | NA       |               | Os12g0571900 | OsR498G1221912900.01.T06 | Plant RNA cleavage stimulation factor                             |
| maker-12-augustus-gene-238.2-mRNA-1  | Japonica | NA       |               | Os12g0570500 | OsR498G1221909500.01.T03 | SAM domain-containing protein                                     |
| maker-12-augustus-gene-238.22-mRNA-1 | Japonica | NA       |               | Os12g0572000 | OsR498G1221913200.01.T01 | Protein rough sheath 2 homolog                                    |
| maker-12-augustus-gene-238.7-mRNA-1  | Japonica | Indica   |               | Os12g0571000 | OsR498G1221910700.01.T01 | Metallothionein-like protein 1, putative, expressed               |
| maker-12-augustus-gene-239.25-mRNA-1 | Japonica | NA       |               | Os12g0572500 | OsR498G1221916500.01.T04 | XH domain containing protein, expressed                           |
| maker-12-augustus-gene-239.30-mRNA-1 | Japonica | Indica   |               | Os12g0573000 | OsR498G1221918300.01.T02 |                                                                   |
| maker-12-augustus-gene-239.37-mRNA-1 | Japonica | NA       |               | Os12g0573900 |                          |                                                                   |
| maker-12-augustus-gene-239.40-mRNA-1 | Japonica | NA       |               | Os12g0572400 | OsR498G1221916200.01.T01 | 35 kDa SR repressor protein                                       |
| maker-12-augustus-gene-239.45-mRNA-1 | Japonica | Indica   |               | Os12g0572800 | OsR498G1221917200.01.T01 | HTH OST-type domain-containing protein                            |
| maker-12-augustus-gene-24.0-mRNA-1   | Japonica | NA       |               |              | OsR498G1220926300.01.T01 |                                                                   |
| maker-12-augustus-gene-24.12-mRNA-1  | Japonica | Indica   |               | Os11g0148400 | OsR498G1220932300.01.T01 | Peptidylprolyl isomerase                                          |
| maker-12-augustus-gene-24.15-mRNA-1  | Japonica | NA       |               | Os12g0145100 | OsR498G1220930000.01.T01 | Stem-specific protein TSJT1                                       |
| maker-12-augustus-gene-24.19-mRNA-1  | Japonica | NA       |               | Os12g0145700 | OsR498G1220932600.01.T01 | Pyruvate kinase                                                   |
| maker-12-augustus-gene-24.29-mRNA-1  | Japonica | NA       | Kinase-LRR-TM |              | OsR498G1220933000.01.T02 | Leucine-rich repeat receptor-like protein kinase PXC1             |
| maker-12-augustus-gene-24.3-mRNA-1   | Japonica | NA       |               | Os12g0144600 | OsR498G1220928100.01.T02 | HMA domain-containing protein (Fragment)                          |
| maker-12-augustus-gene-24.5-mRNA-1   | Japonica | NA       |               | Os12g0145400 | OsR498G1220931300.01.T01 | Protein trichome birefringence-like protein 11                    |
| maker-12-augustus-gene-24.8-mRNA-1   | Japonica | NA       |               | Os12g0145500 | OsR498G1220931500.01.T01 | Peptidylprolyl isomerase                                          |
| maker-12-augustus-gene-240.36-mRNA-1 | Japonica | NA       |               | Os12g0574400 | OsR498G1221921500.01.T05 | PUM-HD domain-containing protein                                  |
| maker-12-augustus-gene-240.39-mRNA-1 | Japonica | NA       |               | Os12g0574000 | OsR498G1221920800.01.T01 | Lysine histidine transporter 1                                    |
| maker-12-augustus-gene-240.41-mRNA-1 | Japonica | NA       |               | Os12g0574900 | OsR498G1221924400.01.T04 | Asparagine synthetase domain-containing protein 1                 |
| maker-12-augustus-gene-240.46-mRNA-1 | Japonica | NA       |               | Os12g0575000 | OsR498G1221924600.01.T01 | Endopolygalacturonase AN8327 (Fragment)                           |
| maker-12-augustus-gene-241.33-mRNA-1 | Japonica | NA       |               |              | OsR498G1221928900.01.T01 | TPX2 (Targeting protein for Xklp2) protein family                 |
| maker-12-augustus-gene-241.38-mRNA-1 | Japonica | NA       |               | Os12g0577100 | OsR498G1221929100.01.T03 | Putative RNA-binding protein 46 isoform X2                        |
| maker-12-augustus-gene-241.56-mRNA-1 | Japonica | Indica   |               | Os12g0576300 | OsR498G1221927000.01.T02 |                                                                   |
| maker-12-augustus-gene-241.59-mRNA-1 | Japonica | NA       |               | Os12g0576600 | OsR498G1221927800.01.T02 | Purple acid phosphatase                                           |
| maker-12-augustus-gene-241.64-mRNA-1 | Japonica | NA       |               | Os12g0576700 | OsR498G1221928000.01.T03 | Purple acid phosphatase                                           |
| maker-12-augustus-gene-241.69-mRNA-1 | Japonica | Indica   |               | Os12g0576600 | OsR498G1221928600.01.T01 | Purple acid phosphatase                                           |
| maker-12-augustus-gene-241.71-mRNA-1 | Japonica | NA       |               | Os12g0576900 | OsR498G1221928800.01.T01 | Diacylglycerol kinase                                             |
| maker-12-augustus-gene-243.4-mRNA-1  | Japonica | NA       |               | Os12g0580500 | OsR498G1221944900.01.T02 | Transcriptional regulator of RNA polII SAGA subunit               |
| maker-12-augustus-gene-243.5-mRNA-1  | Japonica | NA       |               | Os12g0580600 | OsR498G1221945300.01.T04 | Keratin, type II cytoskeletal 2 epidermal-like                    |
| maker-12-augustus-gene-243.7-mRNA-1  | Japonica | NA       |               | Os06g0282000 | OsR498G0816353100.01.T01 | Putative E3 ubiquitin-protein ligase RHY1A                        |
| maker-12-augustus-gene-243.8-mRNA-1  | Japonica | NA       |               | Os12g0580700 | OsR498G1221945700.01.T01 | UDP-glycosyltransferase 89B1                                      |
| maker-12-augustus-gene-244.34-mRNA-1 | Japonica | Indica   |               | Os03g0606100 | OsR498G1221947400.01.T02 | Lipase, putative, expressed                                       |
| maker-12-augustus-gene-245.50-mRNA-1 | Japonica | Indica   |               | Os12g0584100 | OsR498G1221963400.01.T05 |                                                                   |
| maker-12-augustus-gene-247.3-mRNA-1  | Japonica | NA       |               | Os12g0586300 | OsR498G1221989900.01.T01 | Myb family transcription factor EFM                               |
| maker-12-augustus-gene-247.6-mRNA-1  | Japonica | NA       |               | Os03g0240900 | OsR498G1221990100.01.T01 |                                                                   |
| maker-12-augustus-gene-248.31-mRNA-1 | Japonica | NA       |               | Os12g0586600 | OsR498G1221990700.01.T02 | Calcium-transporting ATPase                                       |
| maker-12-augustus-gene-248.42-mRNA-1 | Japonica | NA       |               | Os12g0588000 |                          |                                                                   |
| maker-12-augustus-gene-248.44-mRNA-1 | Japonica | NA       |               |              |                          | HTH OST-type domain-containing protein                            |
| maker-12-augustus-gene-248.45-mRNA-1 | Japonica | NA       |               | Os12g0572800 | OsR498G1222005100.01.T04 | RNA recognition motif family protein                              |
| maker-12-augustus-gene-248.48-mRNA-1 | Japonica | NA       |               | Os12g0588100 |                          | Retrotransposon protein, putative, Ty1-copia subclass             |
| maker-12-augustus-gene-249.33-mRNA-1 | Japonica | Japonica |               | Os12g0588400 | OsR498G1221996700.01.T01 |                                                                   |
| maker-12-augustus-gene-249.35-mRNA-1 | Japonica | Japonica |               | Os12g0589400 | OsR498G1222005000.01.T01 |                                                                   |
| maker-12-augustus-gene-249.36-mRNA-1 | Japonica | NA       |               | Os12g0588800 | OsR498G1221999600.01.T01 | Cyclin N-terminal domain-containing protein                       |

|                                      |          |          |           |              |                          |                                                                            |
|--------------------------------------|----------|----------|-----------|--------------|--------------------------|----------------------------------------------------------------------------|
| maker-12-augustus-gene-249.40-mRNA-1 | Japonica | NA       |           | Os12g0588900 | OsR498G1222000200.01.T02 | Cytoplasmic tRNA 2-thiolation protein 2                                    |
| maker-12-augustus-gene-249.42-mRNA-1 | Japonica | Indica   |           | Os03g0617800 | OsR498G1222000400.01.T01 | BHLH domain-containing protein (Fragment)                                  |
| maker-12-augustus-gene-249.44-mRNA-1 | Japonica | NA       |           | Os12g0589100 | OsR498G1222001000.01.T01 | Adenine phosphoribosyltransferase                                          |
| maker-12-augustus-gene-25.0-mRNA-1   | Japonica | Japonica |           | Os12g0147000 | OsR498G1220936100.01.T01 | AT-hook motif nuclear-localized protein                                    |
| maker-12-augustus-gene-25.11-mRNA-1  | Japonica | NA       |           |              | OsR498G1221640400.01.T03 | Formin-like protein 14                                                     |
| maker-12-augustus-gene-25.13-mRNA-1  | Japonica | NA       |           |              | OsR498G1220940200.01.T01 | Retrotransposon protein, putative, unclassified, expressed                 |
| maker-12-augustus-gene-25.3-mRNA-1   | Japonica | NA       |           | Os12g0147500 | OsR498G1220937300.01.T01 | DEAD domain-containing protein (Fragment)                                  |
| maker-12-augustus-gene-25.6-mRNA-1   | Japonica | NA       |           | Os12g0147800 | OsR498G1220938900.01.T01 | Phytosulfokine-alpha                                                       |
| maker-12-augustus-gene-25.9-mRNA-1   | Japonica | Indica   |           | Os11g0148600 | OsR498G1220935000.01.T02 |                                                                            |
| maker-12-augustus-gene-250.0-mRNA-1  | Japonica | NA       |           |              | OsR498G0511259700.01.T01 | Transposon protein, putative, Mutator sub-class, expressed                 |
| maker-12-augustus-gene-250.12-mRNA-1 | Japonica | Indica   |           | Os12g0589400 | OsR498G1222005000.01.T01 |                                                                            |
| maker-12-augustus-gene-250.15-mRNA-1 | Japonica | NA       |           |              | OsR498G1222005600.01.T02 | Kinesin-like protein KIN-12F                                               |
| maker-12-augustus-gene-250.3-mRNA-1  | Japonica | NA       |           |              | OsR498G1222009900.01.T01 |                                                                            |
| maker-12-augustus-gene-250.8-mRNA-1  | Japonica | NA       |           |              | OsR498G1222010100.01.T01 | B3 domain-containing protein                                               |
| maker-12-augustus-gene-251.28-mRNA-1 | Japonica | NA       |           | Os12g0592200 | OsR498G1222012100.01.T01 |                                                                            |
| maker-12-augustus-gene-251.30-mRNA-1 | Japonica | Indica   |           | Os12g0589100 | OsR498G1222012900.01.T01 | Adenine phosphoribosyltransferase                                          |
| maker-12-augustus-gene-251.35-mRNA-1 | Japonica | NA       |           | Os12g0592300 | OsR498G1222012400.01.T02 | B3 domain-containing protein                                               |
| maker-12-augustus-gene-251.37-mRNA-1 | Japonica | Indica   |           | Os12g0593000 | OsR498G1222022200.01.T02 | Guanine nucleotide-binding protein alpha-2 subunit                         |
| maker-12-augustus-gene-252.0-mRNA-1  | Japonica | NA       |           |              |                          | SHR-BD domain-containing protein                                           |
| maker-12-augustus-gene-252.13-mRNA-1 | Japonica | NA       |           | Os12g0594600 | OsR498G1222027900.01.T01 | Skp1 domain-containing protein                                             |
| maker-12-augustus-gene-252.15-mRNA-1 | Japonica | NA       |           | Os12g0594700 |                          | F-box domain containing protein, expressed                                 |
| maker-12-augustus-gene-252.19-mRNA-1 | Japonica | NA       |           | Os12g0595000 | OsR498G1222029400.01.T01 | SPX and EXS domain-containing protein 1                                    |
| maker-12-augustus-gene-252.9-mRNA-1  | Japonica | NA       | Kinase-TM | Os12g0594300 | OsR498G1222027100.01.T01 | Serine/threonine-protein kinase CTR1                                       |
| maker-12-augustus-gene-253.0-mRNA-1  | Japonica | NA       | Kinase-TM | Os12g0595800 | OsR498G1222032500.01.T02 | Wall-associated receptor kinase-like 14                                    |
| maker-12-augustus-gene-253.10-mRNA-1 | Japonica | NA       |           | Os12g0596900 | OsR498G1222034300.01.T02 | Putative glycosylphosphatidylinositol-mannosyltransferase I, PIG-X/PBN1    |
| maker-12-augustus-gene-253.13-mRNA-1 | Japonica | NA       |           | Os12g0597000 | OsR498G1222034900.01.T05 | Calcineurin b-like protein 3-like                                          |
| maker-12-augustus-gene-253.18-mRNA-1 | Japonica | NA       |           |              | OsR498G1222035300.01.T02 | MATH domain-containing protein (Fragment)                                  |
| maker-12-augustus-gene-253.23-mRNA-1 | Japonica | Japonica |           | Os12g0595200 | OsR498G1222028700.01.T01 | F-box domain containing protein, expressed                                 |
| maker-12-augustus-gene-253.25-mRNA-1 | Japonica | NA       |           | Os12g0595300 | OsR498G1222030800.01.T03 | F-box domain containing protein, expressed                                 |
| maker-12-augustus-gene-253.27-mRNA-1 | Japonica | NA       |           | Os12g0594700 | OsR498G1222028700.01.T01 | F-box domain containing protein, expressed                                 |
| maker-12-augustus-gene-253.3-mRNA-1  | Japonica | NA       |           |              | OsR498G1222033700.01.T03 | BTB domain-containing protein                                              |
| maker-12-augustus-gene-253.31-mRNA-1 | Japonica | Indica   |           | Os12g0595600 | OsR498G1222031800.01.T01 | Skp1 domain-containing protein                                             |
| maker-12-augustus-gene-253.34-mRNA-1 | Japonica | NA       |           | Os12g0596000 | OsR498G1222032800.01.T02 | Lipoyl(octanoyl) transferase                                               |
| maker-12-augustus-gene-253.36-mRNA-1 | Japonica | NA       |           | Os12g0597400 | OsR498G1222036000.01.T01 | Putative bifunctional amine oxidase                                        |
| maker-12-augustus-gene-253.6-mRNA-1  | Japonica | NA       |           | Os12g0596800 | OsR498G1222034100.01.T01 | LIM and UIM domain-containing                                              |
| maker-12-augustus-gene-254.35-mRNA-1 | Japonica | NA       |           |              | OsR498G1222038100.01.T01 | Transcription factor PIF4                                                  |
| maker-12-augustus-gene-254.37-mRNA-1 | Japonica | NA       |           |              |                          | BHLH domain-containing protein                                             |
| maker-12-augustus-gene-254.44-mRNA-1 | Japonica | Indica   |           | Os12g0597500 | OsR498G1222036200.01.T01 | Ureidoglycolate amidohydrolase                                             |
| maker-12-augustus-gene-254.48-mRNA-1 | Japonica | NA       |           | Os12g0597700 | OsR498G1222037200.01.T02 | WRKY DNA binding domain containing protein, expressed                      |
| maker-12-augustus-gene-255.48-mRNA-1 | Japonica | NA       |           | Os12g0599900 | OsR498G1222046700.01.T05 | Serine/threonine-protein phosphatase 6 regulatory ankyrin repeat subunit B |
| maker-12-augustus-gene-256.11-mRNA-1 | Japonica | NA       |           |              | OsR498G1222052100.01.T01 | Basic leucine zipper 25                                                    |
| maker-12-augustus-gene-256.21-mRNA-1 | Japonica | NA       |           |              |                          |                                                                            |
| maker-12-augustus-gene-256.9-mRNA-1  | Japonica | NA       |           | Os12g0601400 | OsR498G1222051500.01.T01 | Auxin-responsive protein IAA31                                             |
| maker-12-augustus-gene-259.0-mRNA-1  | Japonica | NA       | Kinase    | Os12g0605900 | OsR498G1222069500.01.T01 | CXC domain-containing TSO1-like protein 1                                  |
| maker-12-augustus-gene-26.32-mRNA-1  | Japonica | Japonica |           | Os12g0148600 | OsR498G0509623900.01.T03 |                                                                            |
| maker-12-augustus-gene-26.35-mRNA-1  | Japonica | Japonica | Kinase-TM | Os12g0149700 | OsR498G1119421300.01.T01 | Serine/threonine-protein kinase D6PKL2                                     |
| maker-12-augustus-gene-26.37-mRNA-1  | Japonica | NA       |           | Os12g0149800 | OsR498G1220944900.01.T03 | G10 protein/predicted nuclear transcription regulator                      |
| maker-12-augustus-gene-26.39-mRNA-1  | Japonica | Indica   |           | Os11g0137300 | OsR498G1220940400.01.T02 | Proteasome-associated protein ECM                                          |
| maker-12-augustus-gene-26.44-mRNA-1  | Japonica | NA       |           | Os12g0148700 | OsR498G1220941200.01.T01 | Putative 2-carboxy-D-arabinitol-1-phosphatase                              |
| maker-12-augustus-gene-26.47-mRNA-1  | Japonica | NA       |           |              |                          | RING-H2 finger protein ATL34                                               |
| maker-12-augustus-gene-26.49-mRNA-1  | Japonica | NA       |           | Os12g0149900 | OsR498G1220945200.01.T01 | IQ domain-containing protein IQM3                                          |
| maker-12-augustus-gene-260.58-mRNA-1 | Japonica | NA       |           | Os12g0608600 | OsR498G1222079400.01.T01 | Sulfurtransferase                                                          |
| maker-12-augustus-gene-260.61-mRNA-1 | Japonica | Japonica | Kinase-TM | Os12g0608700 | OsR498G1222080200.01.T01 | L-type lectin-domain containing receptor kinase IX.1                       |
| maker-12-augustus-gene-260.63-mRNA-1 | Japonica | Japonica | Kinase-TM | Os12g0609000 | OsR498G1222081400.01.T02 | Wall-associated receptor kinase-like 21                                    |
| maker-12-augustus-gene-260.64-mRNA-1 | Japonica | NA       |           | Os12g0609500 | OsR498G1222082600.01.T01 | (-)-isopiperitenone reductase                                              |
| maker-12-augustus-gene-261.0-mRNA-1  | Japonica | NA       |           | Os12g0609800 | OsR498G1222082900.01.T01 | WD repeat-containing protein 75                                            |
| maker-12-augustus-gene-261.11-mRNA-1 | Japonica | NA       |           | Os12g0610800 | OsR498G1222086200.01.T01 | Casparian strip membrane protein 2                                         |
| maker-12-augustus-gene-261.13-mRNA-1 | Japonica | NA       |           | Os12g0611000 | OsR498G1222086600.01.T01 | 18S subunit ribosomal protein (Fragment)                                   |
| maker-12-augustus-gene-261.18-mRNA-1 | Japonica | Indica   | Kinase-TM | Os12g0611100 | OsR498G1222086800.01.T03 | Serine/threonine-protein kinase receptor                                   |
| maker-12-augustus-gene-261.22-mRNA-1 | Japonica | NA       |           |              | OsR498G1222087200.01.T02 | ATP-dependent RNA helicase DeaD                                            |
| maker-12-augustus-gene-261.27-mRNA-1 | Japonica | Indica   |           | Os12g0611300 | OsR498G1222088000.01.T01 | Patatin                                                                    |



|                                      |          |          |           |              |                          |                                                                         |
|--------------------------------------|----------|----------|-----------|--------------|--------------------------|-------------------------------------------------------------------------|
| maker-12-augustus-gene-261.9-mRNA-1  | Japonica | NA       |           | Os12g0610500 | OsR498G1222084900.01.T05 | methyltransferase-like protein 25 isoform X2                            |
| maker-12-augustus-gene-262.27-mRNA-1 | Japonica | NA       |           |              | OsR498G1222092700.01.T01 | Gamma-thionins family protein                                           |
| maker-12-augustus-gene-262.29-mRNA-1 | Japonica | NA       |           | Os12g0612100 | OsR498G1222093000.01.T01 | GDP-L-galactose phosphorylase 1                                         |
| maker-12-augustus-gene-262.32-mRNA-1 | Japonica | NA       |           | Os12g0612300 | OsR498G1222093200.01.T02 | WPP domain-associated protein-like                                      |
| maker-12-augustus-gene-262.35-mRNA-1 | Japonica | NA       |           | Os12g0612400 | OsR498G1222093800.01.T02 | Chaperone DnaJ-domain superfamily protein isoform 1                     |
| maker-12-augustus-gene-262.39-mRNA-1 | Japonica | NA       |           | Os12g0612500 | OsR498G1222094400.01.T06 | MTS domain-containing protein                                           |
| maker-12-augustus-gene-262.42-mRNA-1 | Japonica | NA       |           | Os12g0612700 | OsR498G1222095000.01.T01 | Homeobox-leucine zipper protein ATHB-14                                 |
| maker-12-augustus-gene-263.0-mRNA-1  | Japonica | NA       |           | Os12g0613500 | OsR498G1222097900.01.T03 | LisH dimerization motif                                                 |
| maker-12-augustus-gene-263.10-mRNA-1 | Japonica | NA       |           | Os12g0614000 | OsR498G1222099300.01.T05 | Mediator of RNA polymerase II transcription subunit 19                  |
| maker-12-augustus-gene-263.13-mRNA-1 | Japonica | NA       |           | Os12g0613000 | OsR498G1222095800.01.T01 | CCAAT-binding transcription factor B                                    |
| maker-12-augustus-gene-263.17-mRNA-1 | Japonica | Indica   |           | Os03g0641200 | OsR498G1222096200.01.T01 | High affinity cationic amino acid transporter 1                         |
| maker-12-augustus-gene-263.19-mRNA-1 | Japonica | NA       |           |              |                          | Putative SET-domain containing protein family                           |
| maker-12-augustus-gene-263.22-mRNA-1 | Japonica | Indica   |           | Os12g0613250 | OsR498G1222097400.01.T01 | BTB/POZ domain-containing protein At1g30440 isoform X1                  |
| maker-12-augustus-gene-263.25-mRNA-1 | Japonica | NA       |           | Os12g0613300 | OsR498G1222097800.01.T03 | MYB-type transcription factor                                           |
| maker-12-augustus-gene-263.28-mRNA-1 | Japonica | NA       |           | Os12g0613700 | OsR498G1222099000.01.T02 | Auxin response factor                                                   |
| maker-12-augustus-gene-263.5-mRNA-1  | Japonica | NA       |           | Os12g0613600 | OsR498G1222098700.01.T01 | Remorin, C-terminal region family protein, expressed                    |
| maker-12-augustus-gene-263.7-mRNA-1  | Japonica | NA       |           |              | OsR498G1222099100.01.T01 | Galectin domain-containing protein (Fragment)                           |
| maker-12-augustus-gene-264.0-mRNA-1  | Japonica | Japonica | Kinase-TM | Os12g0615000 | OsR498G1222103900.01.T01 | Wall-associated receptor kinase 3                                       |
| maker-12-augustus-gene-264.11-mRNA-1 | Japonica | NA       |           | Os12g0615400 | OsR498G1222105000.01.T02 | 2-methyl-6-phytyl-1,4-hydroquinone methyltransferase, chloroplastic     |
| maker-12-augustus-gene-264.14-mRNA-1 | Japonica | NA       |           |              | OsR498G1222105200.01.T02 | Metallo-hydrolase/oxidoreductase superfamily protein                    |
| maker-12-augustus-gene-264.17-mRNA-1 | Japonica | NA       |           | Os12g0615500 | OsR498G1222105600.01.T01 | Metallo-hydrolase/oxidoreductase superfamily protein                    |
| maker-12-augustus-gene-264.24-mRNA-1 | Japonica | NA       |           |              |                          | Kinesin-4                                                               |
| maker-12-augustus-gene-264.29-mRNA-1 | Japonica | NA       |           | Os12g0616200 | OsR498G1222107000.01.T01 | 50S ribosomal protein HLP, mitochondrial                                |
| maker-12-augustus-gene-264.3-mRNA-1  | Japonica | NA       | Kinase-TM |              |                          | Wall-associated receptor kinase 5                                       |
| maker-12-augustus-gene-264.5-mRNA-1  | Japonica | NA       |           | Os12g0615700 |                          | Protein DETOXIFICATION                                                  |
| maker-12-augustus-gene-264.9-mRNA-1  | Japonica | NA       |           |              | OsR498G1222103800.01.T07 |                                                                         |
| maker-12-augustus-gene-265.21-mRNA-1 | Japonica | NA       |           | Os12g0616500 | OsR498G1222108900.01.T01 | Cation/H(+) antiporter like                                             |
| maker-12-augustus-gene-265.24-mRNA-1 | Japonica | NA       |           |              | OsR498G1222109300.01.T01 | Serine protease                                                         |
| maker-12-augustus-gene-265.30-mRNA-1 | Japonica | NA       |           | Os12g0616900 | OsR498G1222111900.01.T01 | Pyruvate dehydrogenase (acetyl-transferring)                            |
| maker-12-augustus-gene-265.35-mRNA-1 | Japonica | NA       |           | Os12g0617100 | OsR498G1222112800.01.T05 | Translation initiation factor eIF-2B subunit delta                      |
| maker-12-augustus-gene-268.0-mRNA-1  | Japonica | NA       |           | Os12g0620900 |                          |                                                                         |
| maker-12-augustus-gene-268.14-mRNA-1 | Japonica | NA       | Kinase-TM | Os12g0621500 | OsR498G1222131900.01.T03 | Probable serine/threonine protein kinase IREH1 isoform X1               |
| maker-12-augustus-gene-268.17-mRNA-1 | Japonica | NA       |           | Os12g0621700 | OsR498G1222132700.01.T01 | Protein downstream neighbor of Son                                      |
| maker-12-augustus-gene-268.19-mRNA-1 | Japonica | NA       |           |              | OsR498G1222128200.01.T01 | Cyclin-dependent kinase C-2                                             |
| maker-12-augustus-gene-268.21-mRNA-1 | Japonica | NA       |           | Os12g0621600 | OsR498G1222132200.01.T01 |                                                                         |
| maker-12-augustus-gene-268.6-mRNA-1  | Japonica | NA       |           |              |                          |                                                                         |
| maker-12-augustus-gene-268.7-mRNA-1  | Japonica | NA       |           | Os12g0621100 | OsR498G1222129900.01.T01 | Putative axial regulator YABBY 2                                        |
| maker-12-augustus-gene-269.0-mRNA-1  | Japonica | NA       |           |              |                          | COP9 signalosome complex subunit 6                                      |
| maker-12-augustus-gene-269.10-mRNA-1 | Japonica | NA       |           |              | OsR498G1222136500.01.T01 |                                                                         |
| maker-12-augustus-gene-269.15-mRNA-1 | Japonica | NA       |           |              | OsR498G1222136900.01.T01 |                                                                         |
| maker-12-augustus-gene-269.18-mRNA-1 | Japonica | NA       |           | Os12g0623500 | OsR498G1222137200.01.T02 | Amino acid permease family protein, expressed                           |
| maker-12-augustus-gene-269.25-mRNA-1 | Japonica | NA       |           | Os12g0623600 | OsR498G1222137600.01.T01 | Cysteine dioxygenase                                                    |
| maker-12-augustus-gene-269.30-mRNA-1 | Japonica | NA       |           |              |                          | Dihydrofolate synthetase                                                |
| maker-12-augustus-gene-269.5-mRNA-1  | Japonica | NA       |           | Os12g0622900 | OsR498G1222136100.01.T01 | AP2/ERF domain-containing protein                                       |
| maker-12-augustus-gene-269.9-mRNA-1  | Japonica | NA       |           |              | OsR498G1222136500.01.T01 | PHD domain-containing protein                                           |
| maker-12-augustus-gene-27.37-mRNA-1  | Japonica | NA       |           | Os12g0151000 | OsR498G1220949100.01.T01 | Purple acid phosphatase                                                 |
| maker-12-augustus-gene-27.39-mRNA-1  | Japonica | NA       |           | Os12g0151900 | OsR498G1220950900.01.T03 |                                                                         |
| maker-12-augustus-gene-27.41-mRNA-1  | Japonica | NA       |           | Os12g0152100 | OsR498G1220951300.01.T01 | Putative dihydrolipoyllysine-residue acetyltransferase                  |
| maker-12-augustus-gene-27.43-mRNA-1  | Japonica | Indica   |           | Os11g0151700 | OsR498G1220948000.01.T01 | Purple acid phosphatase                                                 |
| maker-12-augustus-gene-27.45-mRNA-1  | Japonica | NA       |           | Os12g0152000 | OsR498G1220951200.01.T01 | Centroradialis                                                          |
| maker-12-augustus-gene-270.31-mRNA-1 | Japonica | NA       |           | Os12g0623900 | OsR498G1222138500.01.T02 | 5-methyltetrahydropteroyltriglutamate--homocysteine S-methyltransferase |
| maker-12-augustus-gene-270.36-mRNA-1 | Japonica | NA       |           | Os12g0624000 | OsR498G1222139100.01.T03 | 5-methyltetrahydropteroyltriglutamate--homocysteine S-methyltransferase |
| maker-12-augustus-gene-270.42-mRNA-1 | Japonica | NA       |           | Os12g0624900 | OsR498G1222141300.01.T01 | GATA transcription factor                                               |
| maker-12-augustus-gene-270.45-mRNA-1 | Japonica | NA       |           |              | OsR498G1222140600.01.T01 | BRCT domain-containing protein                                          |
| maker-12-augustus-gene-270.47-mRNA-1 | Japonica | Japonica |           | Os12g0624800 | OsR498G1222141000.01.T02 | Copper transport protein ATX1                                           |
| maker-12-augustus-gene-270.49-mRNA-1 | Japonica | Indica   |           | Os12g0625000 | OsR498G1222141600.01.T01 | Cytosolic cysteine synthase                                             |
| maker-12-augustus-gene-271.32-mRNA-1 | Japonica | NA       |           |              | OsR498G1222147000.01.T01 |                                                                         |
| maker-12-augustus-gene-271.34-mRNA-1 | Japonica | Japonica |           | Os12g0626000 | OsR498G1222146600.01.T01 |                                                                         |
| maker-12-augustus-gene-271.36-mRNA-1 | Japonica | NA       |           | Os12g0626100 | OsR498G1222146100.01.T01 | Deoxyhypusine hydroxylase                                               |
| maker-12-augustus-gene-271.40-mRNA-1 | Japonica | NA       |           |              | OsR498G1222145300.01.T02 | Anaphase-promoting complex subunit 5                                    |
| maker-12-augustus-gene-271.46-mRNA-1 | Japonica | Indica   |           | Os12g0626400 | OsR498G1222144900.01.T01 | Phytoene synthase, chloroplastic                                        |

|                                      |          |          |           |              |                          |                                                                            |
|--------------------------------------|----------|----------|-----------|--------------|--------------------------|----------------------------------------------------------------------------|
| maker-12-augustus-gene-272.0-mRNA-1  | Japonica | NA       |           |              | OsR498G1222148300.01.T01 | Putative endoplasmic reticulum insertion protein SEC61                     |
| maker-12-augustus-gene-272.10-mRNA-1 | Japonica | NA       |           | Os12g0628100 | OsR498G1222149200.01.T02 | Actin-depolymerizing factor 11                                             |
| maker-12-augustus-gene-272.2-mRNA-1  | Japonica | NA       |           | Os12g0628400 | OsR498G1222149900.01.T04 | Aldehyde oxygenase (deformylating)                                         |
| maker-12-augustus-gene-272.5-mRNA-1  | Japonica | NA       |           | Os12g0628500 | OsR498G1222150100.01.T01 | Methionine aminopeptidase 2                                                |
| maker-12-augustus-gene-273.42-mRNA-1 | Japonica | NA       |           |              | OsR498G1222159100.01.T02 | PMD domain-containing protein                                              |
| maker-12-augustus-gene-29.0-mRNA-1   | Japonica | NA       |           | Os04g0530400 | OsR498G1220960500.01.T01 | SNARE-complex protein Syntaxin-18 N-terminal                               |
| maker-12-augustus-gene-3.103-mRNA-1  | Japonica | NA       |           | Os11g0106400 | OsR498G1119292600.01.T02 | E1 ubiquitin-activating enzyme                                             |
| maker-12-augustus-gene-3.107-mRNA-1  | Japonica | NA       |           | Os12g0106000 | OsR498G1220799800.01.T01 | Ferritin                                                                   |
| maker-12-augustus-gene-3.35-mRNA-1   | Japonica | NA       |           | Os12g0104700 | OsR498G1220795300.01.T01 | Protein trichome birefringence-like 28                                     |
| maker-12-augustus-gene-3.40-mRNA-1   | Japonica | NA       |           |              | OsR498G1119287500.01.T03 | Clathrin heavy chain                                                       |
| maker-12-augustus-gene-3.43-mRNA-1   | Japonica | NA       |           |              | OsR498G1220795500.01.T05 | Clathrin heavy chain                                                       |
| maker-12-augustus-gene-3.60-mRNA-1   | Japonica | Indica   |           | Os11g0205500 | OsR498G1220796300.01.T01 |                                                                            |
| maker-12-augustus-gene-3.62-mRNA-1   | Japonica | Japonica |           | Os12g0106100 | OsR498G1220799900.01.T01 | Pentatricopeptide repeat-containing protein At5g12100, mitochondrial (Frag |
| maker-12-augustus-gene-3.69-mRNA-1   | Japonica | NA       |           | Os12g0106300 | OsR498G1220800900.01.T01 | Protein trichome birefringence-like 34                                     |
| maker-12-augustus-gene-3.74-mRNA-1   | Japonica | NA       |           | Os11g0105400 | OsR498G1220797200.01.T01 | Ribosome assembly factor mrt4                                              |
| maker-12-augustus-gene-3.78-mRNA-1   | Japonica | NA       |           | Os11g0105750 | OsR498G1220797600.01.T03 | Protein CHUP1 chloroplastic                                                |
| maker-12-augustus-gene-3.85-mRNA-1   | Japonica | NA       |           | Os12g0105500 | OsR498G1220798000.01.T01 | Phytol kinase 2                                                            |
| maker-12-augustus-gene-3.90-mRNA-1   | Japonica | NA       |           | Os12g0105600 | OsR498G1220798200.01.T01 | HTH myb-type domain-containing protein (Fragment)                          |
| maker-12-augustus-gene-3.93-mRNA-1   | Japonica | NA       |           | Os12g0105700 | OsR498G1119292200.01.T01 | Sorting and assembly machinery component 50 A                              |
| maker-12-augustus-gene-3.97-mRNA-1   | Japonica | NA       | Kinase-TM |              | OsR498G1220798800.01.T02 | Putative LRR receptor-like serine/threonine-protein kinase MRH1-like       |
| maker-12-augustus-gene-31.0-mRNA-1   | Japonica | Indica   |           | Os12g0158600 | OsR498G1220981300.01.T01 |                                                                            |
| maker-12-augustus-gene-32.40-mRNA-1  | Japonica | NA       |           | Os12g0160400 | OsR498G1220988300.01.T02 | Transcription factor LHW                                                   |
| maker-12-augustus-gene-32.45-mRNA-1  | Japonica | NA       |           | Os12g0160900 |                          |                                                                            |
| maker-12-augustus-gene-32.53-mRNA-1  | Japonica | Indica   |           | Os12g0160500 | OsR498G1220988600.01.T02 | BEL1-like homeodomain protein 1 isoform A                                  |
| maker-12-augustus-gene-33.0-mRNA-1   | Japonica | NA       |           | Os12g0162500 | OsR498G1221000100.01.T01 | Transcription factor VIP1                                                  |
| maker-12-augustus-gene-33.16-mRNA-1  | Japonica | NA       |           | Os12g0162400 | OsR498G1220999600.01.T01 | Calcineurin B                                                              |
| maker-12-augustus-gene-33.3-mRNA-1   | Japonica | Indica   |           | Os12g0161500 | OsR498G1220994200.01.T01 |                                                                            |
| maker-12-augustus-gene-34.12-mRNA-1  | Japonica | NA       |           | Os12g0163400 | OsR498G1221003000.01.T01 | Tubby-like F-box protein 13                                                |
| maker-12-augustus-gene-34.15-mRNA-1  | Japonica | NA       |           | Os12g0163700 | OsR498G1221004400.01.T01 | Actin beta/gamma 1                                                         |
| maker-12-augustus-gene-34.19-mRNA-1  | Japonica | NA       | Kinase-TM |              | OsR498G1221004600.01.T03 | Serine/threonine-protein kinase STY46                                      |
| maker-12-augustus-gene-34.2-mRNA-1   | Japonica | NA       |           | Os12g0163200 | OsR498G1221002500.01.T01 | Nucleolar complex protein 2                                                |
| maker-12-augustus-gene-34.5-mRNA-1   | Japonica | NA       |           |              | OsR498G1221001800.01.T01 | HTH OST-type domain-containing protein (Fragment)                          |
| maker-12-augustus-gene-34.7-mRNA-1   | Japonica | NA       |           | Os12g0163000 | OsR498G1221002000.01.T01 | Cyclic nucleotide-gated ion channel like                                   |
| maker-12-augustus-gene-34.9-mRNA-1   | Japonica | NA       |           | Os12g0163300 | OsR498G1221002800.01.T02 | Deoxyhypusine hydroxylase-A                                                |
| maker-12-augustus-gene-35.0-mRNA-1   | Japonica | Indica   |           | Os12g0164300 | OsR498G1221005700.01.T02 | F-box protein interaction domain containing protein, expressed             |
| maker-12-augustus-gene-35.11-mRNA-1  | Japonica | NA       |           |              | OsR498G1221010700.01.T04 | nucleolar protein 6                                                        |
| maker-12-augustus-gene-35.16-mRNA-1  | Japonica | NA       |           |              | OsR498G1221007200.01.T05 | DUF676 domain-containing protein                                           |
| maker-12-augustus-gene-35.2-mRNA-1   | Japonica | NA       |           | Os12g0165400 |                          | Citrate-binding protein-like                                               |
| maker-12-augustus-gene-35.23-mRNA-1  | Japonica | NA       |           | Os12g0165000 | OsR498G1221007600.01.T01 | WD repeat-containing protein 48                                            |
| maker-12-augustus-gene-35.30-mRNA-1  | Japonica | NA       |           | Os12g0165200 | OsR498G1221007800.01.T01 | SHSP domain-containing protein (Fragment)                                  |
| maker-12-augustus-gene-35.32-mRNA-1  | Japonica | NA       |           | Os12g0165700 | OsR498G1221008600.01.T01 | Mediator of RNA polymerase II transcription subunit 26c like               |
| maker-12-augustus-gene-35.4-mRNA-1   | Japonica | NA       |           |              | OsR498G1221009500.01.T01 | Peptidase S59 domain-containing protein (Fragment)                         |
| maker-12-augustus-gene-35.8-mRNA-1   | Japonica | NA       |           |              | OsR498G1221009900.01.T01 | Peptidase S59 domain-containing protein                                    |
| maker-12-augustus-gene-36.0-mRNA-1   | Japonica | NA       | NBS-TM    |              | OsR498G1221011500.01.T01 | Disease resistance protein RPM1                                            |
| maker-12-augustus-gene-36.13-mRNA-1  | Japonica | NA       |           |              | OsR498G1221013000.01.T01 | SAP domain containing protein, expressed                                   |
| maker-12-augustus-gene-36.19-mRNA-1  | Japonica | Japonica |           | Os12g0168100 | OsR498G1221014600.01.T01 | Cold-responsive element-binding factor 3                                   |
| maker-12-augustus-gene-36.2-mRNA-1   | Japonica | NA       |           | Os12g0167900 | OsR498G1221014100.01.T01 | Ribosomal protein L3                                                       |
| maker-12-augustus-gene-36.21-mRNA-1  | Japonica | NA       |           |              |                          | Protein-serine/threonine phosphatase                                       |
| maker-12-augustus-gene-36.6-mRNA-1   | Japonica | NA       |           | Os12g0168000 | OsR498G1221014300.01.T03 | Methenyltetrahydrofolate synthase domain-containing protein (Fragment)     |
| maker-12-augustus-gene-36.9-mRNA-1   | Japonica | NA       |           | Os12g0168400 | OsR498G1221016100.01.T01 | Gametophytic factor 2                                                      |
| maker-12-augustus-gene-37.0-mRNA-1   | Japonica | NA       |           | Os12g0168700 | OsR498G1221017900.01.T04 | Long chain acyl-CoA synthetase 9 chloroplastic                             |
| maker-12-augustus-gene-37.11-mRNA-1  | Japonica | Indica   |           | Os11g0170000 | OsR498G1221019600.01.T03 | Amidase domain-containing protein                                          |
| maker-12-augustus-gene-37.18-mRNA-1  | Japonica | NA       |           | Os12g0169100 | OsR498G1221020200.01.T02 | Filament-like plant protein 3                                              |
| maker-12-augustus-gene-37.23-mRNA-1  | Japonica | NA       |           | Os12g0169400 | OsR498G1221020400.01.T01 | CBS-PB1 domain contining protein                                           |
| maker-12-augustus-gene-37.27-mRNA-1  | Japonica | NA       |           | Os12g0169800 | OsR498G1221021400.01.T02 | Calcium-dependent protein kinase SK5                                       |
| maker-12-augustus-gene-37.3-mRNA-1   | Japonica | NA       |           | Os12g0169700 | OsR498G1221021100.01.T01 | Gamma carbonic anhydrase 2 mitochondrial                                   |
| maker-12-augustus-gene-37.34-mRNA-1  | Japonica | NA       |           | Os12g0170100 | OsR498G1221022200.01.T02 | Pentatricopeptide repeat-containing protein mitochondrial                  |
| maker-12-augustus-gene-37.36-mRNA-1  | Japonica | NA       |           | Os12g0170200 | OsR498G1221022400.01.T01 | Bile acid sodium symporter/ transporter                                    |
| maker-12-augustus-gene-37.8-mRNA-1   | Japonica | NA       |           | Os12g0168900 | OsR498G1221019400.01.T01 | V-type proton ATPase proteolipid subunit                                   |
| maker-12-augustus-gene-38.30-mRNA-1  | Japonica | NA       |           | Os12g0170600 | OsR498G1221022900.01.T02 | 4-alpha-L-fucosyltransferase                                               |
| maker-12-augustus-gene-38.33-mRNA-1  | Japonica | NA       |           |              | OsR498G1221023300.01.T03 | RNA cytidine acetyltransferase                                             |

|                                     |          |          |               |              |                          |                                                                            |
|-------------------------------------|----------|----------|---------------|--------------|--------------------------|----------------------------------------------------------------------------|
| maker-12-augustus-gene-38.40-mRNA-1 | Japonica | NA       |               | Os12g0170800 | OsR498G1221023500.01.T01 | Citrate binding protein, putative, expressed                               |
| maker-12-augustus-gene-38.42-mRNA-1 | Japonica | NA       |               | Os12g0171200 | OsR498G1221024300.01.T02 | Polynucleotide adenyllyltransferase family protein                         |
| maker-12-augustus-gene-38.48-mRNA-1 | Japonica | Japonica |               | Os12g0171600 | OsR498G1221024900.01.T02 |                                                                            |
| maker-12-augustus-gene-38.50-mRNA-1 | Japonica | NA       |               | Os12g0172400 |                          | DUF1618 domain-containing protein (Fragment)                               |
| maker-12-augustus-gene-38.52-mRNA-1 | Japonica | NA       |               |              | OsR498G1221024800.01.T03 |                                                                            |
| maker-12-augustus-gene-39.0-mRNA-1  | Japonica | NA       |               | Os01g0177400 | OsR498G0917551500.01.T01 | Gibberellin 3-beta-dioxygenase 2-2                                         |
| maker-12-augustus-gene-39.1-mRNA-1  | Japonica | NA       |               | Os12g0174000 | OsR498G1221030100.01.T02 | XS domain-containing protein (Fragment)                                    |
| maker-12-augustus-gene-39.3-mRNA-1  | Japonica | NA       |               | Os12g0174100 | OsR498G1221030300.01.T01 | O-fucosyltransferase family protein (Fragment)                             |
| maker-12-augustus-gene-39.8-mRNA-1  | Japonica | NA       |               | Os12g0172500 | OsR498G1221026000.01.T02 | Dystrophia myotonica WD repeat-containing protein-like                     |
| maker-12-augustus-gene-39.9-mRNA-1  | Japonica | NA       |               | Os12g0172500 | OsR498G1221026000.01.T05 | Dystrophia myotonica WD repeat-containing protein-like                     |
| maker-12-augustus-gene-4.46-mRNA-1  | Japonica | NA       |               | Os12g0106500 | OsR498G1220801500.01.T01 | Nodulin-like domain-containing protein (Fragment)                          |
| maker-12-augustus-gene-4.50-mRNA-1  | Japonica | NA       |               |              |                          | Protein DETOXIFICATION                                                     |
| maker-12-augustus-gene-4.55-mRNA-1  | Japonica | NA       |               | Os11g0107500 | OsR498G1119296500.01.T02 | Macrophage migration inhibitory factor                                     |
| maker-12-augustus-gene-4.60-mRNA-1  | Japonica | Indica   | Kinase-LRR-TM | Os11g0107700 | OsR498G1220804500.01.T01 | probable leucine-rich repeat receptor-like protein kinase IMK3             |
| maker-12-augustus-gene-4.63-mRNA-1  | Japonica | NA       |               | Os12g0108000 | OsR498G1220805900.01.T01 | Laccase                                                                    |
| maker-12-augustus-gene-4.68-mRNA-1  | Japonica | Japonica |               | Os12g0106700 | OsR498G1220802400.01.T03 |                                                                            |
| maker-12-augustus-gene-4.71-mRNA-1  | Japonica | Indica   |               | Os12g0106900 | OsR498G1220802600.01.T03 | Kinesin-like protein KIN-UA                                                |
| maker-12-augustus-gene-4.76-mRNA-1  | Japonica | NA       |               |              |                          | E1 ubiquitin-activating enzyme                                             |
| maker-12-augustus-gene-40.0-mRNA-1  | Japonica | NA       |               | Os12g0175400 | OsR498G1221036900.01.T01 | MYB transcription factor                                                   |
| maker-12-augustus-gene-40.16-mRNA-1 | Japonica | NA       |               |              | OsR498G1221034400.01.T01 | Myb domain protein 98                                                      |
| maker-12-augustus-gene-40.18-mRNA-1 | Japonica | NA       |               | Os12g0175500 | OsR498G1221038000.01.T01 | Bifunctional monothiol glutaredoxin-S16 chloroplastic                      |
| maker-12-augustus-gene-40.20-mRNA-1 | Japonica | NA       |               | Os12g0175900 | OsR498G1221038600.01.T03 | Ribonuclease P                                                             |
| maker-12-augustus-gene-40.3-mRNA-1  | Japonica | NA       |               | Os12g0175700 | OsR498G1221038300.01.T03 | Transmembrane 9 superfamily member                                         |
| maker-12-augustus-gene-40.7-mRNA-1  | Japonica | NA       |               | Os12g0176200 | OsR498G1221038900.01.T01 | NifU-like protein 2 chloroplastic                                          |
| maker-12-augustus-gene-40.9-mRNA-1  | Japonica | NA       |               | Os12g0174800 | OsR498G1221033800.01.T02 | Protein-tyrosine-phosphatase PTP1                                          |
| maker-12-augustus-gene-41.34-mRNA-1 | Japonica | NA       |               | Os12g0176500 | OsR498G1221039500.01.T01 | Replication factor C / DNA polymerase III gamma-tau subunit                |
| maker-12-augustus-gene-41.43-mRNA-1 | Japonica | NA       |               | Os12g0176600 | OsR498G1221039900.01.T04 | SWI/SNF complex subunit SWI3C                                              |
| maker-12-augustus-gene-41.44-mRNA-1 | Japonica | NA       |               | Os12g0177500 |                          | Aspartic proteinase Asp1                                                   |
| maker-12-augustus-gene-41.52-mRNA-1 | Japonica | NA       |               | Os12g0176800 | OsR498G1221040200.01.T01 | Protein-synthesizing GTPase                                                |
| maker-12-augustus-gene-41.56-mRNA-1 | Japonica | NA       |               | Os12g0178100 | OsR498G1221041600.01.T01 | L-ascorbate peroxidase                                                     |
| maker-12-augustus-gene-41.61-mRNA-1 | Japonica | NA       |               | Os12g0178200 | OsR498G1221042000.01.T01 | L-ascorbate peroxidase                                                     |
| maker-12-augustus-gene-42.0-mRNA-1  | Japonica | Indica   |               | Os09g0254600 | OsR498G1221042700.01.T01 | Bidirectional sugar transporter SWEET                                      |
| maker-12-augustus-gene-42.14-mRNA-1 | Japonica | NA       |               | Os12g0179800 | OsR498G1221045200.01.T03 | NAD-dependent protein deacylase                                            |
| maker-12-augustus-gene-42.18-mRNA-1 | Japonica | NA       | Kinase-TM     |              | OsR498G1221046200.01.T01 | Protein kinase protein with adenine nucleotide alpha hydrolase-like domain |
| maker-12-augustus-gene-42.2-mRNA-1  | Japonica | Indica   |               | Os12g0180400 | OsR498G1221045900.01.T01 | DNA-directed RNA polymerase, subunit N/Rpb                                 |
| maker-12-augustus-gene-42.4-mRNA-1  | Japonica | NA       |               | Os12g0180600 |                          |                                                                            |
| maker-12-augustus-gene-42.6-mRNA-1  | Japonica | Indica   |               | Os12g0178633 | OsR498G1221044000.01.T01 | WD repeat-containing protein 44                                            |
| maker-12-augustus-gene-42.9-mRNA-1  | Japonica | NA       |               | Os12g0178700 | OsR498G1221044200.01.T02 | Dynamin-like protein ARC5                                                  |
| maker-12-augustus-gene-43.10-mRNA-1 | Japonica | NA       |               |              |                          | Protein kinase domain-containing protein                                   |
| maker-12-augustus-gene-43.14-mRNA-1 | Japonica | NA       |               | Os12g0181300 | OsR498G1221046400.01.T01 | TRAF-type domain-containing protein                                        |
| maker-12-augustus-gene-43.17-mRNA-1 | Japonica | NA       |               | Os12g0181600 | OsR498G1221047500.01.T01 | Amino acid permease                                                        |
| maker-12-augustus-gene-43.2-mRNA-1  | Japonica | NA       |               | Os12g0181500 | OsR498G1221047500.01.T01 | Amino acid permease                                                        |
| maker-12-augustus-gene-43.4-mRNA-1  | Japonica | Japonica |               | Os12g0180800 | OsR498G0408793100.01.T02 | BHLH domain-containing protein                                             |
| maker-12-augustus-gene-43.8-mRNA-1  | Japonica | NA       | Kinase-TM     |              | OsR498G1221046200.01.T01 | Protein kinase protein with adenine nucleotide alpha hydrolase-like domain |
| maker-12-augustus-gene-44.0-mRNA-1  | Japonica | NA       |               | Os12g0182700 | OsR498G1221051500.01.T01 | Histone deacetylase                                                        |
| maker-12-augustus-gene-44.10-mRNA-1 | Japonica | NA       |               | Os12g0183100 | OsR498G1221052100.01.T03 | 2-oxoisovalerate dehydrogenase subunit alpha 2 mitochondrial               |
| maker-12-augustus-gene-44.16-mRNA-1 | Japonica | NA       |               | Os12g0182200 | OsR498G1221050000.01.T01 | Dihydrolipoamide acetyltransferase component of pyruvate dehydrogenase     |
| maker-12-augustus-gene-44.21-mRNA-1 | Japonica | NA       | Kinase-LRR-TM | Os12g0182300 | OsR498G1221050600.01.T01 | Tyrosine-protein kinase                                                    |
| maker-12-augustus-gene-44.24-mRNA-1 | Japonica | NA       |               |              |                          | cx9C motif-containing protein 4                                            |
| maker-12-augustus-gene-44.26-mRNA-1 | Japonica | NA       |               | Os12g0183200 | OsR498G1221052400.01.T03 | 3'(2'),5'-bisphosphate nucleotidase                                        |
| maker-12-augustus-gene-44.30-mRNA-1 | Japonica | NA       |               | Os12g0183300 | OsR498G1221052800.01.T01 | 3'(2'),5'-bisphosphate nucleotidase                                        |
| maker-12-augustus-gene-44.34-mRNA-1 | Japonica | NA       |               |              | OsR498G1221055000.01.T01 |                                                                            |
| maker-12-augustus-gene-44.5-mRNA-1  | Japonica | NA       |               |              | OsR498G1221051700.01.T03 | Proteasome assembly chaperone                                              |
| maker-12-augustus-gene-46.35-mRNA-1 | Japonica | NA       |               | Os12g0188500 | OsR498G1221057100.01.T01 | BTB/POZ domain-containing protein At2g13690                                |
| maker-12-augustus-gene-46.38-mRNA-1 | Japonica | NA       |               | Os12g0187800 | OsR498G1221056000.01.T01 |                                                                            |
| maker-12-augustus-gene-46.40-mRNA-1 | Japonica | NA       |               | Os12g0188700 | OsR498G1221058200.01.T02 | Chloroplast thioredoxin M-type                                             |
| maker-12-augustus-gene-47.0-mRNA-1  | Japonica | NA       |               |              | OsR498G1221058300.01.T01 | Small RNA degrading nuclease 5                                             |
| maker-12-augustus-gene-47.12-mRNA-1 | Japonica | NA       |               | Os12g0189900 | OsR498G1221061300.01.T01 | Ribosomal biogenesis protein LAS1L                                         |
| maker-12-augustus-gene-47.17-mRNA-1 | Japonica | NA       |               | Os12g0190100 | OsR498G1221061900.01.T03 | O-fucosyltransferase family protein (Fragment)                             |
| maker-12-augustus-gene-47.20-mRNA-1 | Japonica | NA       |               | Os12g0189500 | OsR498G1221059800.01.T01 | Flavin-containing monooxygenase                                            |
| maker-12-augustus-gene-47.23-mRNA-1 | Japonica | NA       |               | Os12g0190000 | OsR498G1221061600.01.T01 | GDP-L-galactose phosphorylase                                              |

|                                     |          |          |               |              |                          |                                                                  |
|-------------------------------------|----------|----------|---------------|--------------|--------------------------|------------------------------------------------------------------|
| maker-12-augustus-gene-47.26-mRNA-1 | Japonica | NA       |               | Os12g0190200 | OsR498G1221062200.01.T01 | PsbP domain-containing protein 4, chloroplastic                  |
| maker-12-augustus-gene-47.9-mRNA-1  | Japonica | Japonica |               | Os12g0189400 | OsR498G1221059300.01.T01 | Photosystem I reaction center subunit N like                     |
| maker-12-augustus-gene-48.0-mRNA-1  | Japonica | Indica   |               | Os01g0729600 | OsR498G1221064700.01.T01 | Putative cysteine desulfurase                                    |
| maker-12-augustus-gene-48.2-mRNA-1  | Japonica | Indica   |               | Os01g0729600 | OsR498G1221062400.01.T01 | Putative cysteine desulfurase                                    |
| maker-12-augustus-gene-48.4-mRNA-1  | Japonica | Indica   |               | Os05g0281400 | OsR498G1221064200.01.T06 |                                                                  |
| maker-12-augustus-gene-48.6-mRNA-1  | Japonica | NA       |               | Os12g0191500 | OsR498G1221065400.01.T01 | Peroxidase                                                       |
| maker-12-augustus-gene-49.0-mRNA-1  | Japonica | NA       |               | Os12g0192500 | OsR498G1221069500.01.T01 | Thiamine-phosphate pyrophosphorylase                             |
| maker-12-augustus-gene-49.6-mRNA-1  | Japonica | NA       |               |              | OsR498G1221071100.01.T01 | BRX domain-containing protein                                    |
| maker-12-augustus-gene-49.8-mRNA-1  | Japonica | NA       |               |              | OsR498G1221071400.01.T02 |                                                                  |
| maker-12-augustus-gene-5.0-mRNA-1   | Japonica | NA       |               | Os12g0108500 | OsR498G1220808300.01.T01 | F-box/LRR-repeat protein 3                                       |
| maker-12-augustus-gene-5.11-mRNA-1  | Japonica | NA       |               | Os12g0108900 |                          | DNA (Cytosine-5)-methyltransferase DRM2                          |
| maker-12-augustus-gene-5.16-mRNA-1  | Japonica | Japonica | Kinase        | Os12g0109800 | OsR498G1119298800.01.T04 | Putative serine/threonine-protein kinase                         |
| maker-12-augustus-gene-5.18-mRNA-1  | Japonica | NA       | Kinase-TM     | Os12g0108100 | OsR498G1220806200.01.T01 | Putative serine/threonine-protein kinase                         |
| maker-12-augustus-gene-5.22-mRNA-1  | Japonica | NA       |               |              | OsR498G1220810000.01.T01 | ADP-glucose pyrophosphorylase                                    |
| maker-12-augustus-gene-5.7-mRNA-1   | Japonica | Japonica |               | Os12g0108600 | OsR498G1220808500.01.T01 | Catalytic protein serine threonine phosphatase                   |
| maker-12-augustus-gene-50.40-mRNA-1 | Japonica | Japonica |               | Os12g0193800 | OsR498G1221072900.01.T02 | NAC domain-containing protein                                    |
| maker-12-augustus-gene-50.46-mRNA-1 | Japonica | Japonica |               | Os12g0194600 | OsR498G1221077900.01.T03 | BZIP type transcription factor                                   |
| maker-12-augustus-gene-50.48-mRNA-1 | Japonica | NA       |               |              |                          | GTP--RNA guanylyltransferase                                     |
| maker-12-augustus-gene-50.54-mRNA-1 | Japonica | NA       |               |              |                          |                                                                  |
| maker-12-augustus-gene-50.58-mRNA-1 | Japonica | NA       |               | Os12g0194700 | OsR498G1221078200.01.T01 | DNA-directed RNA polymerases I and III subunit like              |
| maker-12-augustus-gene-51.37-mRNA-1 | Japonica | NA       |               | Os12g0194900 | OsR498G1221079100.01.T01 | Amino acid transporter                                           |
| maker-12-augustus-gene-52.0-mRNA-1  | Japonica | NA       |               | Os12g0197400 | OsR498G1221087100.01.T02 | Chloroplast protein import component                             |
| maker-12-augustus-gene-52.2-mRNA-1  | Japonica | Japonica |               | Os12g0196700 | OsR498G1221085600.01.T01 | Cytochrome P450 family protein, expressed                        |
| maker-12-augustus-gene-52.4-mRNA-1  | Japonica | NA       |               | Os12g0197100 | OsR498G1221086600.01.T01 | Glycinamide ribonucleotide synthetase                            |
| maker-12-augustus-gene-52.6-mRNA-1  | Japonica | NA       |               | Os12g0197500 | OsR498G1221087400.01.T01 | Suppressor of gene silencing 3                                   |
| maker-12-augustus-gene-52.8-mRNA-1  | Japonica | Japonica |               | Os12g0197700 | OsR498G1221087800.01.T01 | Suppressor of gene silencing 3                                   |
| maker-12-augustus-gene-53.34-mRNA-1 | Japonica | Indica   |               | Os11g0240900 | OsR498G1221087900.01.T02 | CCR4-NOT transcription complex subunit 11                        |
| maker-12-augustus-gene-53.41-mRNA-1 | Japonica | Indica   | CC-NBS-TM     | Os09g0517200 | OsR498G1221092300.01.T02 | Disease resistance protein RPM1                                  |
| maker-12-augustus-gene-53.42-mRNA-1 | Japonica | NA       |               | Os12g0198200 | OsR498G1221088800.01.T01 | PPM-type phosphatase domain-containing protein                   |
| maker-12-augustus-gene-53.44-mRNA-1 | Japonica | NA       |               | Os12g0198400 |                          |                                                                  |
| maker-12-augustus-gene-53.45-mRNA-1 | Japonica | NA       |               |              | OsR498G1221090600.01.T01 |                                                                  |
| maker-12-augustus-gene-54.35-mRNA-1 | Japonica | NA       |               |              |                          | Caffeate O-methyltransferase-1 (Fragment)                        |
| maker-12-augustus-gene-56.10-mRNA-1 | Japonica | NA       |               |              | OsR498G1221096000.01.T05 | Methyltransferase                                                |
| maker-12-augustus-gene-56.2-mRNA-1  | Japonica | Japonica |               | Os12g0202800 | OsR498G1221094300.01.T02 | Putative inactive methyltransferase                              |
| maker-12-augustus-gene-56.4-mRNA-1  | Japonica | NA       | Kinase-TM     | Os11g0242500 | OsR498G1119688900.01.T03 | Serine/threonine-protein kinase                                  |
| maker-12-augustus-gene-56.8-mRNA-1  | Japonica | NA       |               |              | OsR498G1221096900.01.T01 | Aquaporin                                                        |
| maker-12-augustus-gene-58.16-mRNA-1 | Japonica | NA       |               | Os12g0207000 | OsR498G1221103500.01.T01 | MADS domain transporter AGL11                                    |
| maker-12-augustus-gene-58.18-mRNA-1 | Japonica | NA       |               | Os12g0207200 | OsR498G1221103700.01.T01 | Transposon protein, putative, CACTA, En/Spm sub-class, expressed |
| maker-12-augustus-gene-58.20-mRNA-1 | Japonica | NA       |               | Os12g0207300 | OsR498G1221104100.01.T02 | AP complex subunit sigma                                         |
| maker-12-augustus-gene-59.23-mRNA-1 | Japonica | NA       |               |              | OsR498G1221106700.01.T04 | 28S ribosomal protein S23                                        |
| maker-12-augustus-gene-59.26-mRNA-1 | Japonica | NA       |               | Os12g0209200 | OsR498G1221107500.01.T01 | B-box zinc finger protein 20                                     |
| maker-12-augustus-gene-59.28-mRNA-1 | Japonica | NA       |               | Os12g0209700 | OsR498G1221108500.01.T01 | PHD domain-containing protein                                    |
| maker-12-augustus-gene-59.35-mRNA-1 | Japonica | NA       |               | Os12g0209000 | OsR498G1221106400.01.T02 | AAA domain-containing protein (Fragment)                         |
| maker-12-augustus-gene-59.41-mRNA-1 | Japonica | NA       |               | Os12g0209300 | OsR498G1221107800.01.T02 | ATPase, AAA family protein, expressed                            |
| maker-12-augustus-gene-6.0-mRNA-1   | Japonica | Indica   |               | Os12g0110400 | OsR498G1220815500.01.T04 | Plastid transcriptionally active 6                               |
| maker-12-augustus-gene-6.10-mRNA-1  | Japonica | Japonica |               | Os11g0112150 | OsR498G1220816700.01.T02 | Proteoglycan 4-like                                              |
| maker-12-augustus-gene-6.16-mRNA-1  | Japonica | NA       |               | Os12g0112000 | OsR498G1220818100.01.T01 | Peroxidase                                                       |
| maker-12-augustus-gene-6.25-mRNA-1  | Japonica | NA       |               | Os12g0112300 | OsR498G1220818700.01.T05 | ADP,ATP carrier protein (Fragment)                               |
| maker-12-augustus-gene-6.33-mRNA-1  | Japonica | NA       |               |              | OsR498G1220819100.01.T01 | AAI domain-containing protein (Fragment)                         |
| maker-12-augustus-gene-6.35-mRNA-1  | Japonica | NA       |               |              | OsR498G1220814400.01.T03 | DRBM domain-containing protein                                   |
| maker-12-augustus-gene-6.39-mRNA-1  | Japonica | NA       |               | Os12g0110000 | OsR498G1220814600.01.T02 | Regulatory-associated protein of TOR 1                           |
| maker-12-augustus-gene-6.5-mRNA-1   | Japonica | Indica   |               | Os11g0111800 | OsR498G1220815900.01.T01 | Transcription factor bHLH61 like                                 |
| maker-12-augustus-gene-6.53-mRNA-1  | Japonica | NA       |               | Os12g0110100 | OsR498G1220815000.01.T04 | Alpha/beta-Hydrolases superfamily protein                        |
| maker-12-augustus-gene-6.57-mRNA-1  | Japonica | NA       |               | Os12g0110300 | OsR498G1220815400.01.T01 | lwr1 domain-containing protein                                   |
| maker-12-augustus-gene-6.63-mRNA-1  | Japonica | NA       |               | Os12g0111500 | OsR498G1119309400.01.T01 | BTB domain-containing protein (Fragment)                         |
| maker-12-augustus-gene-6.65-mRNA-1  | Japonica | NA       |               | Os11g0112000 | OsR498G1119309800.01.T03 | HIG1 domain-containing protein (Fragment)                        |
| maker-12-augustus-gene-6.67-mRNA-1  | Japonica | Japonica |               | Os12g0111900 | OsR498G1119310800.01.T01 | Biogenesis of lysosome-related organelles complex 1 subunit 1    |
| maker-12-augustus-gene-60.24-mRNA-1 | Japonica | NA       |               | Os12g0210200 | OsR498G1221109700.01.T07 | Glutathione transferase18                                        |
| maker-12-augustus-gene-60.27-mRNA-1 | Japonica | Japonica |               | Os12g0210300 | OsR498G1221109700.01.T07 | Glutathione transferase18                                        |
| maker-12-augustus-gene-60.29-mRNA-1 | Japonica | NA       | Kinase-LRR-TM | Os12g0210400 | OsR498G1221109900.01.T01 | Leucine-rich repeat receptor-like protein kinase                 |
| maker-12-augustus-gene-60.38-mRNA-1 | Japonica | NA       |               | Os07g0652800 |                          | 3-deoxy-8-phosphooctulonate synthase                             |

|                                     |          |          |               |              |                          |                                                                              |
|-------------------------------------|----------|----------|---------------|--------------|--------------------------|------------------------------------------------------------------------------|
| maker-12-augustus-gene-60.44-mRNA-1 | Japonica | Japonica |               | Os12g0211000 | OsR498G1221112500.01.T01 | RING-type domain-containing protein                                          |
| maker-12-augustus-gene-60.46-mRNA-1 | Japonica | NA       |               | Os12g0211100 | OsR498G1221113500.01.T01 | Peptidase A1 domain-containing protein                                       |
| maker-12-augustus-gene-60.49-mRNA-1 | Japonica | NA       |               |              | OsR498G1221114100.01.T01 | Retrotransposon protein, putative, unclassified                              |
| maker-12-augustus-gene-60.52-mRNA-1 | Japonica | NA       |               |              |                          |                                                                              |
| maker-12-augustus-gene-60.55-mRNA-1 | Japonica | NA       |               |              |                          | Retrotransposon protein, putative, unclassified                              |
| maker-12-augustus-gene-60.57-mRNA-1 | Japonica | NA       |               | Os12g0211400 | OsR498G1221115300.01.T01 | Adenine DNA glycosylase                                                      |
| maker-12-augustus-gene-64.30-mRNA-1 | Japonica | NA       |               | Os12g0217300 | OsR498G1221121400.01.T01 |                                                                              |
| maker-12-augustus-gene-65.27-mRNA-1 | Japonica | NA       |               |              | OsR498G1221129600.01.T03 | Reverse transcriptase domain-containing protein                              |
| maker-12-augustus-gene-66.35-mRNA-1 | Japonica | NA       |               | Os04g0184800 | OsR498G0204883800.01.T01 | Transposon protein, putative, Mutator sub-class                              |
| maker-12-augustus-gene-67.20-mRNA-1 | Japonica | NA       |               | Os03g0154300 | OsR498G1119934800.01.T01 |                                                                              |
| maker-12-augustus-gene-69.0-mRNA-1  | Japonica | NA       |               | Os12g0223300 | OsR498G1221135300.01.T01 | Cytochrome b5-like Heme/Steroid binding domain containing protein, expressed |
| maker-12-augustus-gene-69.3-mRNA-1  | Japonica | NA       |               |              | OsR498G1221137200.01.T04 | Diacylglycerol kinase                                                        |
| maker-12-augustus-gene-69.8-mRNA-1  | Japonica | Indica   |               | Os12g0224400 | OsR498G1221138400.01.T01 | probable xyloglucan galactosyltransferase GT19                               |
| maker-12-augustus-gene-7.0-mRNA-1   | Japonica | NA       |               | Os12g0112600 | OsR498G1220819500.01.T01 | Stress response protein nst1-like isoform X1                                 |
| maker-12-augustus-gene-7.13-mRNA-1  | Japonica | NA       |               | Os11g0114700 | OsR498G1220847100.01.T02 | Nucleotidyltransferase family protein, putative, expressed                   |
| maker-12-augustus-gene-7.2-mRNA-1   | Japonica | NA       |               | Os11g0113300 | OsR498G1220819900.01.T01 | Serine/arginine-rich splicing factor like                                    |
| maker-12-augustus-gene-7.4-mRNA-1   | Japonica | Indica   |               | Os12g0114500 | OsR498G1220846600.01.T01 | Non-specific lipid-transfer protein (Fragment)                               |
| maker-12-augustus-gene-7.6-mRNA-1   | Japonica | NA       |               | Os11g0113100 | OsR498G1119313200.01.T01 | Phosphoglucan phosphatase                                                    |
| maker-12-augustus-gene-7.9-mRNA-1   | Japonica | NA       | Kinase        | Os12g0114100 | OsR498G1220847300.01.T01 | probable serine/threonine-protein kinase WNK5                                |
| maker-12-augustus-gene-70.0-mRNA-1  | Japonica | Indica   |               | Os12g0225200 | OsR498G1221142300.01.T01 | Outer envelope pore protein 37 chloroplastic                                 |
| maker-12-augustus-gene-70.11-mRNA-1 | Japonica | Indica   |               | Os11g0248200 | OsR498G1221142200.01.T01 | Transposon protein, putative, Mutator sub-class, expressed                   |
| maker-12-augustus-gene-70.6-mRNA-1  | Japonica | NA       |               | Os12g0224500 | OsR498G1221138800.01.T02 | Putative histone-lysine N-methyltransferase chromatin regulator PHD family   |
| maker-12-augustus-gene-71.0-mRNA-1  | Japonica | Indica   |               | Os12g0226900 | OsR498G1221145100.01.T04 | NADP-dependent oxidoreductase P1, putative, expressed                        |
| maker-12-augustus-gene-71.10-mRNA-1 | Japonica | Indica   |               | Os12g0226300 | OsR498G1221146500.01.T01 |                                                                              |
| maker-12-augustus-gene-71.12-mRNA-1 | Japonica | NA       |               | Os12g0226700 | OsR498G1221146700.01.T01 | NADP-dependent oxidoreductase P2, putative, expressed                        |
| maker-12-augustus-gene-71.16-mRNA-1 | Japonica | NA       |               | Os12g0226900 | OsR498G1221146900.01.T01 | NADP-dependent alkenal double bond reductase P1                              |
| maker-12-augustus-gene-71.22-mRNA-1 | Japonica | NA       |               | Os12g0227500 | OsR498G1221147900.01.T01 | Dirigent protein (Fragment)                                                  |
| maker-12-augustus-gene-71.4-mRNA-1  | Japonica | NA       |               |              |                          | Putative NADP-dependent oxidoreductase P1                                    |
| maker-12-augustus-gene-72.0-mRNA-1  | Japonica | NA       |               |              |                          | Jacalin-like lectin domain containing protein, expressed                     |
| maker-12-augustus-gene-72.11-mRNA-1 | Japonica | NA       |               |              | OsR498G1221152200.01.T02 | Leucine Rich Repeat family protein, expressed                                |
| maker-12-augustus-gene-72.17-mRNA-1 | Japonica | NA       |               |              |                          | Transposon protein, putative, CACTA, En/Spm sub-class                        |
| maker-12-augustus-gene-72.2-mRNA-1  | Japonica | NA       |               |              | OsR498G1221150600.01.T01 | Carboxymethylenebutenolidase homolog                                         |
| maker-12-augustus-gene-72.4-mRNA-1  | Japonica | NA       |               |              | OsR498G1221151000.01.T03 | Putative chaperonin Cpn60/TCF-1 family, groEL-like apical domain, groEL-like |
| maker-12-augustus-gene-72.8-mRNA-1  | Japonica | NA       |               |              |                          | NAM-associated domain-containing protein                                     |
| maker-12-augustus-gene-73.27-mRNA-1 | Japonica | NA       |               |              | OsR498G1221155300.01.T01 | PGG domain-containing protein                                                |
| maker-12-augustus-gene-73.29-mRNA-1 | Japonica | NA       |               | Os12g0230200 | OsR498G1221156900.01.T01 | Calcium-dependent protein kinase                                             |
| maker-12-augustus-gene-73.31-mRNA-1 | Japonica | NA       |               | Os12g0230600 | OsR498G1221157700.01.T01 |                                                                              |
| maker-12-augustus-gene-73.34-mRNA-1 | Japonica | NA       |               | Os12g0230100 | OsR498G1221155800.01.T02 | ATP-dependent Clp protease ATP-binding subunit clpA like CD4B, chloroplastic |
| maker-12-augustus-gene-74.1-mRNA-1  | Japonica | NA       |               | Os12g0231000 | OsR498G1221158500.01.T01 | Peptide transporter PTR5                                                     |
| maker-12-augustus-gene-74.11-mRNA-1 | Japonica | NA       |               |              | OsR498G1221158800.01.T01 | KAT8 regulatory NSL complex subunit 2                                        |
| maker-12-augustus-gene-74.13-mRNA-1 | Japonica | NA       |               |              |                          | RWP-RK domain containing protein                                             |
| maker-12-augustus-gene-74.4-mRNA-1  | Japonica | NA       |               | Os01g0650700 |                          |                                                                              |
| maker-12-augustus-gene-74.6-mRNA-1  | Japonica | NA       |               |              | OsR498G0714279400.01.T01 | Hydroxyproline-rich glycoprotein-like                                        |
| maker-12-augustus-gene-74.9-mRNA-1  | Japonica | Indica   |               | Os01g0218500 | OsR498G1221161500.01.T01 | TWIN SISTER of FT protein, putative, expressed                               |
| maker-12-augustus-gene-75.0-mRNA-1  | Japonica | Indica   |               | Os12g0233100 | OsR498G1221165700.01.T01 | WW domain containing protein, expressed                                      |
| maker-12-augustus-gene-75.10-mRNA-1 | Japonica | NA       |               |              | OsR498G1221166500.01.T01 | Secretory pathway Sec39                                                      |
| maker-12-augustus-gene-75.14-mRNA-1 | Japonica | NA       |               |              | OsR498G0407513400.01.T01 | Hydroxyproline-rich glycoprotein-like                                        |
| maker-12-augustus-gene-75.16-mRNA-1 | Japonica | NA       |               | Os12g0233800 | OsR498G1221167000.01.T02 | Transcription factor HBP-1a                                                  |
| maker-12-augustus-gene-75.2-mRNA-1  | Japonica | NA       |               | Os12g0233300 | OsR498G1221165900.01.T03 | HIT domain-containing protein (Fragment)                                     |
| maker-12-augustus-gene-75.7-mRNA-1  | Japonica | NA       |               | Os12g0233400 | OsR498G1221166100.01.T06 | C2H2-type domain-containing protein (Fragment)                               |
| maker-12-augustus-gene-76.35-mRNA-1 | Japonica | Indica   | Kinase-LRR-TM | Os11g0300600 | OsR498G1221171100.01.T01 | Putative inactive leucine-rich repeat receptor-like protein kinase           |
| maker-12-augustus-gene-76.37-mRNA-1 | Japonica | NA       |               | Os12g0235800 | OsR498G1221171700.01.T01 | Citrulline--aspartate ligase                                                 |
| maker-12-augustus-gene-76.42-mRNA-1 | Japonica | NA       |               |              | OsR498G1221169000.01.T02 |                                                                              |
| maker-12-augustus-gene-76.44-mRNA-1 | Japonica | NA       |               |              | OsR498G1221172000.01.T02 | C2 NT-type domain-containing protein                                         |
| maker-12-augustus-gene-77.0-mRNA-1  | Japonica | NA       |               | Os12g0236400 | OsR498G1221174100.01.T01 | Adenylate kinase                                                             |
| maker-12-augustus-gene-77.11-mRNA-1 | Japonica | NA       |               |              | OsR498G1221172800.01.T01 | Cullin, N-terminal                                                           |
| maker-12-augustus-gene-77.13-mRNA-1 | Japonica | NA       |               | Os12g0236500 | OsR498G1221175000.01.T02 | Zn-dependent exopeptidases superfamily protein (Fragment)                    |
| maker-12-augustus-gene-77.3-mRNA-1  | Japonica | NA       |               | Os09g0278300 |                          | 1-phosphatidylinositol-3-phosphate 5-kinase                                  |
| maker-12-augustus-gene-77.8-mRNA-1  | Japonica | NA       |               | Os12g0236900 | OsR498G1221179700.01.T01 | Histone-lysine N-methyltransferase                                           |
| maker-12-augustus-gene-78.0-mRNA-1  | Japonica | NA       |               |              | OsR498G1221180400.01.T01 |                                                                              |
| maker-12-augustus-gene-78.2-mRNA-1  | Japonica | NA       |               | Os12g0238000 | OsR498G1221183200.01.T01 | Myb-like DNA-binding domain containing protein, expressed                    |

|                                     |          |          |           |              |                          |                                                                          |
|-------------------------------------|----------|----------|-----------|--------------|--------------------------|--------------------------------------------------------------------------|
| maker-12-augustus-gene-78.9-mRNA-1  | Japonica | NA       |           | Os12g0238100 | OsR498G1221184600.01.T01 | Exocyst complex component 5                                              |
| maker-12-augustus-gene-79.16-mRNA-1 | Japonica | Japonica |           | Os12g0238900 | OsR498G1221185500.01.T02 | Glycosyltransferase, HGA-like, putative, expressed                       |
| maker-12-augustus-gene-79.18-mRNA-1 | Japonica | NA       |           | Os12g0239000 | OsR498G1221186200.01.T01 | Proline-rich family protein                                              |
| maker-12-augustus-gene-79.23-mRNA-1 | Japonica | Indica   |           | Os12g0239200 | OsR498G1221186800.01.T03 | Proline-rich family protein                                              |
| maker-12-augustus-gene-79.26-mRNA-1 | Japonica | NA       |           |              |                          | ABC transporter domain-containing protein                                |
| maker-12-augustus-gene-8.47-mRNA-1  | Japonica | NA       |           | Os12g0115900 | OsR498G1220842800.01.T03 | EFP domain-containing protein                                            |
| maker-12-augustus-gene-8.54-mRNA-1  | Japonica | NA       |           | Os01g0874300 | OsR498G0409243500.01.T01 | MYB transcription factor MYB5                                            |
| maker-12-augustus-gene-8.56-mRNA-1  | Japonica | NA       |           | Os12g0115700 | OsR498G1220843100.01.T03 | Chalcone-flavonone isomerase family protein (Fragment)                   |
| maker-12-augustus-gene-8.63-mRNA-1  | Japonica | NA       |           | Os12g0116000 | OsR498G1220842300.01.T01 | Vacuolar-sorting receptor 1                                              |
| maker-12-augustus-gene-8.67-mRNA-1  | Japonica | NA       |           | Os11g0116900 | OsR498G1220841100.01.T01 | WRKY DNA binding domain containing protein, expressed                    |
| maker-12-augustus-gene-8.70-mRNA-1  | Japonica | NA       |           | Os11g0117400 | OsR498G1119327000.01.T01 | WRKY DNA binding domain containing protein, expressed                    |
| maker-12-augustus-gene-8.72-mRNA-1  | Japonica | Indica   |           | Os11g0117500 | OsR498G1220839300.01.T01 | WRKY transcription factor 64                                             |
| maker-12-augustus-gene-8.75-mRNA-1  | Japonica | Indica   |           | Os11g0117600 | OsR498G1220838500.01.T02 | WRKY DNA binding domain containing protein, expressed                    |
| maker-12-augustus-gene-80.24-mRNA-1 | Japonica | NA       |           | Os04g0597400 | OsR498G0409209500.01.T01 | Peptide transporter PTR2                                                 |
| maker-12-augustus-gene-80.25-mRNA-1 | Japonica | NA       |           | Os12g0240900 | OsR498G1221191800.01.T01 | Tricetin 3',4',5'-O-trimethyltransferase                                 |
| maker-12-augustus-gene-81.28-mRNA-1 | Japonica | Indica   |           | Os12g0242700 | OsR498G1221198900.01.T04 | Beta-ketoacyl-acyl carrier protein reductase                             |
| maker-12-augustus-gene-81.31-mRNA-1 | Japonica | NA       |           | Os12g0242900 | OsR498G1221199400.01.T01 | DNA polymerase alpha subunit B                                           |
| maker-12-augustus-gene-82.0-mRNA-1  | Japonica | NA       |           |              |                          |                                                                          |
| maker-12-augustus-gene-82.10-mRNA-1 | Japonica | NA       |           | Os12g0244500 | OsR498G1221201400.01.T01 | Ribosome biogenesis protein slx9-like                                    |
| maker-12-augustus-gene-82.2-mRNA-1  | Japonica | NA       |           | Os12g0244100 | OsR498G1221200700.01.T01 | Molecular chaperones mortalin/PBP74/GRP75, HSP70 superfamily             |
| maker-12-augustus-gene-82.6-mRNA-1  | Japonica | NA       |           | Os12g0244400 | OsR498G1221201100.01.T01 | Lysine histidine transporter like                                        |
| maker-12-augustus-gene-82.8-mRNA-1  | Japonica | Japonica |           | Os12g0245100 | OsR498G1221203300.01.T01 |                                                                          |
| maker-12-augustus-gene-85.0-mRNA-1  | Japonica | NA       |           |              | OsR498G0612461700.01.T02 |                                                                          |
| maker-12-augustus-gene-85.2-mRNA-1  | Japonica | Indica   |           | Os03g0853200 | OsR498G1221215500.01.T01 | FeS cluster assembly protein sufB                                        |
| maker-12-augustus-gene-85.4-mRNA-1  | Japonica | Japonica | Kinase-TM | Os12g0248000 | OsR498G1221217600.01.T01 | Interleukin-1 receptor-associated kinase 4                               |
| maker-12-augustus-gene-86.0-mRNA-1  | Japonica | Indica   | Kinase-TM | Os12g0249900 | OsR498G1221216600.01.T01 | Protein kinase domain-containing protein                                 |
| maker-12-augustus-gene-86.2-mRNA-1  | Japonica | NA       | Kinase-TM | Os12g0249900 |                          | Proline-rich receptor-like protein kinase PERK2 isoform X2               |
| maker-12-augustus-gene-9.0-mRNA-1   | Japonica | NA       |           | Os12g0117100 | OsR498G1220836800.01.T01 | Methylesterase 17                                                        |
| maker-12-augustus-gene-9.18-mRNA-1  | Japonica | Indica   |           | Os12g0118900 | OsR498G1220832200.01.T02 | Secologanin synthase                                                     |
| maker-12-augustus-gene-9.21-mRNA-1  | Japonica | NA       |           | Os12g0119000 | OsR498G1220832200.01.T01 | Secologanin synthase                                                     |
| maker-12-augustus-gene-9.23-mRNA-1  | Japonica | Indica   |           | Os12g0119700 | OsR498G1119333300.01.T02 | Retrotransposon protein, putative, Ty1-copia subclass                    |
| maker-12-augustus-gene-9.25-mRNA-1  | Japonica | NA       |           | Os12g0119500 | OsR498G1220831200.01.T01 | Eukaryotic translation initiation factor 3 subunit B                     |
| maker-12-augustus-gene-9.27-mRNA-1  | Japonica | NA       |           | Os11g0117700 | OsR498G1220837700.01.T01 |                                                                          |
| maker-12-augustus-gene-9.29-mRNA-1  | Japonica | NA       |           | Os12g0117250 | OsR498G1220836100.01.T01 | Mannan endo-1,4-beta-mannosidase                                         |
| maker-12-augustus-gene-9.32-mRNA-1  | Japonica | NA       |           | Os12g0117600 | OsR498G1220834900.01.T01 | BTB/POZ domain-containing protein At3g08570                              |
| maker-12-augustus-gene-9.34-mRNA-1  | Japonica | NA       |           | Os12g0117800 | OsR498G1119331000.01.T02 | NAM-associated domain-containing protein                                 |
| maker-12-augustus-gene-9.35-mRNA-1  | Japonica | NA       |           | Os11g0118800 | OsR498G1220834100.01.T01 | Zinc finger CCH domain protein                                           |
| maker-12-augustus-gene-9.4-mRNA-1   | Japonica | NA       |           | Os12g0117200 | OsR498G1220836400.01.T03 | AB hydrolase-1 domain-containing protein                                 |
| maker-12-augustus-gene-9.9-mRNA-1   | Japonica | Japonica |           | Os12g0118400 | OsR498G1119332100.01.T03 | 2-hydroxy-6-oxononadienedioate/2-hydroxy-6-oxononatrienedioate hydrolase |
| maker-12-augustus-gene-90.37-mRNA-1 | Japonica | NA       |           | Os12g0256000 | OsR498G1221220100.01.T01 | CXE carboxylesterase                                                     |
| maker-12-augustus-gene-90.39-mRNA-1 | Japonica | Japonica |           | Os12g0256300 | OsR498G1221220300.01.T01 | Putative pre-mRNA-splicing factor cwc-22                                 |
| maker-12-augustus-gene-90.46-mRNA-1 | Japonica | NA       |           |              | OsR498G1221221500.01.T01 | PMD domain-containing protein                                            |
| maker-12-augustus-gene-90.50-mRNA-1 | Japonica | NA       |           | Os12g0257000 | OsR498G1221222200.01.T03 | Carboxypeptidase                                                         |
| maker-12-augustus-gene-91.0-mRNA-1  | Japonica | Indica   |           | Os12g0259800 | OsR498G1221223500.01.T01 | Laccase                                                                  |
| maker-12-augustus-gene-91.3-mRNA-1  | Japonica | NA       | Kinase-TM | Os12g0257900 | OsR498G1221224100.01.T01 | Non-specific serine/threonine protein kinase                             |
| maker-12-augustus-gene-91.5-mRNA-1  | Japonica | NA       |           | Os12g0258200 | OsR498G1221224400.01.T03 | DnaJ protein ERD17                                                       |
| maker-12-augustus-gene-92.32-mRNA-1 | Japonica | NA       |           | Os12g0258700 | OsR498G1221227900.01.T01 | Laccase                                                                  |
| maker-12-augustus-gene-93.0-mRNA-1  | Japonica | NA       |           | Os12g0259800 | OsR498G1221230900.01.T01 | Laccase                                                                  |
| maker-12-augustus-gene-93.3-mRNA-1  | Japonica | NA       |           | Os08g0514800 |                          | PtTA/En/Spm family plant transposase                                     |
| maker-12-augustus-gene-93.6-mRNA-1  | Japonica | NA       |           | Os12g0260500 | OsR498G1221233200.01.T01 | Putative sex determination protein tasselseed 2                          |
| maker-12-augustus-gene-94.20-mRNA-1 | Japonica | Indica   |           | Os12g0551200 | OsR498G1221234700.01.T01 | Disease resistance protein                                               |
| maker-12-augustus-gene-94.23-mRNA-1 | Japonica | NA       |           | Os12g0261300 | OsR498G1221234900.01.T01 | Retrotransposon protein, putative, unclassified, expressed               |
| maker-12-augustus-gene-94.25-mRNA-1 | Japonica | NA       |           |              | OsR498G1221237400.01.T01 | CCT domain-containing protein (Fragment)                                 |
| maker-12-augustus-gene-95.32-mRNA-1 | Japonica | NA       |           | Os12g0262700 | OsR498G1221238700.01.T01 | Caffeoylshikimate esterase                                               |
| maker-12-augustus-gene-95.36-mRNA-1 | Japonica | Indica   |           | Os12g0263000 | OsR498G1221239800.01.T02 | Glutathione synthetase                                                   |
| maker-12-augustus-gene-95.46-mRNA-1 | Japonica | NA       |           | Os12g0263100 | OsR498G1221240800.01.T01 | S-acyltransferase                                                        |
| maker-12-augustus-gene-95.48-mRNA-1 | Japonica | Indica   |           | Os12g0265100 | OsR498G1221241000.01.T01 | S-acyltransferase                                                        |
| maker-12-augustus-gene-95.50-mRNA-1 | Japonica | NA       |           | Os12g0263200 | OsR498G1221241000.01.T03 | NmrA domain-containing protein                                           |
| maker-12-augustus-gene-95.52-mRNA-1 | Japonica | Indica   |           | Os12g0263200 | OsR498G1221242000.01.T03 | S-acyltransferase                                                        |
| maker-12-augustus-gene-95.60-mRNA-1 | Japonica | NA       |           |              | OsR498G1221244600.01.T01 | Cytokinin inducible protein-like                                         |
| maker-12-augustus-gene-96.0-mRNA-1  | Japonica | NA       |           |              |                          | 3-hydroxyisobutyryl-coenzyme A hydrolase, putative, expressed            |

|                                     |          |          |               |              |                          |                                                           |
|-------------------------------------|----------|----------|---------------|--------------|--------------------------|-----------------------------------------------------------|
| maker-12-augustus-gene-96.18-mRNA-1 | Japonica | NA       |               | Os12g0265100 | OsR498G1221249000.01.T01 | NmrA domain-containing protein (Fragment)                 |
| maker-12-augustus-gene-97.0-mRNA-1  | Japonica | NA       |               |              |                          | Hydroxyproline O-galactosyltransferase                    |
| maker-12-augustus-gene-97.1-mRNA-1  | Japonica | Indica   |               | Os12g0265600 | OsR498G1221250200.01.T04 | Galectin domain-containing protein (Fragment)             |
| maker-12-augustus-gene-97.10-mRNA-1 | Japonica | NA       |               | Os12g0266200 | OsR498G1221252200.01.T03 | Wall-associated receptor kinase 3                         |
| maker-12-augustus-gene-97.8-mRNA-1  | Japonica | Japonica | CC-Kinase-TM  | Os12g0265900 | OsR498G1221251800.01.T01 | Wall-associated receptor kinase 2                         |
| maker-12-augustus-gene-98.0-mRNA-1  | Japonica | Japonica |               | Os12g0267100 | OsR498G0714282700.01.T02 | Cyclopropane fatty acid synthase                          |
| maker-12-augustus-gene-98.2-mRNA-1  | Japonica | Japonica |               | Os12g0267200 | OsR498G1221257500.01.T01 | Mycolic acid cyclopropane synthase                        |
| maker-12-augustus-gene-98.6-mRNA-1  | Japonica | NA       |               | Os12g0267900 | OsR498G1221260700.01.T01 | Zinc finger, RING-type                                    |
| maker-12-augustus-gene-98.9-mRNA-1  | Japonica | NA       |               |              | OsR498G1221261800.01.T01 | Tryptamine 5-hydroxylase                                  |
| maker-2-augustus-gene-1.42-mRNA-1   | Japonica | Indica   |               | Os02g0101900 | OsR498G0202802900.01.T01 | Homeobox protein engrailed-1                              |
| maker-2-augustus-gene-1.45-mRNA-1   | Japonica | NA       |               | Os02g0102200 | OsR498G0202803900.01.T01 | Amino acid transporter, transmembrane                     |
| maker-2-augustus-gene-1.48-mRNA-1   | Japonica | NA       |               | Os02g0102300 | OsR498G0202804500.01.T01 | Rhodanese domain-containing protein                       |
| maker-2-augustus-gene-1.50-mRNA-1   | Japonica | NA       |               | Os02g0102600 | OsR498G0202805100.01.T01 | ATP-dependent Clp protease proteolytic subunit 4          |
| maker-2-augustus-gene-1.52-mRNA-1   | Japonica | NA       |               | Os02g0102800 | OsR498G0202805500.01.T01 | Protein ENHANCED DISEASE RESISTANCE 2                     |
| maker-2-augustus-gene-1.54-mRNA-1   | Japonica | NA       |               | Os02g0102900 | OsR498G0202806100.01.T05 | RuBisCO large subunit-binding protein subunit beta        |
| maker-2-augustus-gene-1.82-mRNA-1   | Japonica | NA       |               |              | OsR498G0202804800.01.T01 | Ribosomal protein S5                                      |
| maker-2-augustus-gene-1.87-mRNA-1   | Japonica | NA       |               | Os02g0102700 | OsR498G0202805400.01.T01 | Small nuclear ribonucleoprotein Sm D3                     |
| maker-2-augustus-gene-100.28-mRNA-1 | Japonica | NA       |               | Os02g0273000 | OsR498G0203396500.01.T01 | Uridine kinase                                            |
| maker-2-augustus-gene-100.35-mRNA-1 | Japonica | Indica   | CC-LRR-NBS-TM | Os02g0272900 | OsR498G0203396700.01.T01 | AAA domain-containing protein                             |
| maker-2-augustus-gene-100.39-mRNA-1 | Japonica | NA       |               | Os02g0273700 | OsR498G0203398500.01.T02 | VHS and GAT domain protein                                |
| maker-2-augustus-gene-100.44-mRNA-1 | Japonica | Indica   |               | Os02g0274000 | OsR498G0203399500.01.T01 |                                                           |
| maker-2-augustus-gene-100.48-mRNA-1 | Japonica | NA       |               | Os02g0274100 | OsR498G0203400100.01.T02 | 3-hydroxyacyl-CoA dehydrogenase                           |
| maker-2-augustus-gene-100.53-mRNA-1 | Japonica | NA       |               | Os02g0273800 | OsR498G0203399200.01.T03 | Ribonuclease P                                            |
| maker-2-augustus-gene-100.55-mRNA-1 | Japonica | Japonica |               | Os02g0273900 | OsR498G0612559700.01.T02 | Ubiquitin carrier protein E2 21 isoform 1                 |
| maker-2-augustus-gene-100.57-mRNA-1 | Japonica | NA       | LRR-TM        | Os02g0274200 |                          | Receptor-like protein 12                                  |
| maker-2-augustus-gene-101.41-mRNA-1 | Japonica | NA       |               |              |                          | Putative plastidic glucose transporter 2                  |
| maker-2-augustus-gene-101.47-mRNA-1 | Japonica | NA       |               | Os02g0275100 | OsR498G0203402100.01.T02 | Cytochrome c-type biogenesis protein (Fragment)           |
| maker-2-augustus-gene-101.49-mRNA-1 | Japonica | NA       |               |              | OsR498G0203400800.01.T03 | CRC domain-containing protein                             |
| maker-2-augustus-gene-101.53-mRNA-1 | Japonica | NA       |               | Os02g0275200 | OsR498G0203402400.01.T01 | Fucosyltransferase                                        |
| maker-2-augustus-gene-102.10-mRNA-1 | Japonica | NA       |               | Os02g0276400 | OsR498G0203404200.01.T01 | Putative inactive nicotinamidase                          |
| maker-2-augustus-gene-102.14-mRNA-1 | Japonica | NA       |               | Os02g0276500 | OsR498G0203404400.01.T03 | Tocopherol cyclase, chloroplastic                         |
| maker-2-augustus-gene-102.18-mRNA-1 | Japonica | NA       |               | Os02g0276900 | OsR498G0203406200.01.T05 | Transcription factor bHLH68                               |
| maker-2-augustus-gene-102.24-mRNA-1 | Japonica | NA       | Kinase-LRR-TM |              | OsR498G0203410200.01.T02 | Putative leucine-rich repeat receptor-like protein kinase |
| maker-2-augustus-gene-102.7-mRNA-1  | Japonica | NA       |               |              | OsR498G0203403000.01.T01 | Putative inactive nicotinamidase isoform B                |
| maker-2-augustus-gene-103.0-mRNA-1  | Japonica | Japonica |               | Os02g0278400 | OsR498G0203410500.01.T01 | Ent-isokaurene C2-hydroxylase                             |
| maker-2-augustus-gene-103.2-mRNA-1  | Japonica | NA       |               | Os02g0279600 | OsR498G0203413500.01.T01 | Tobamovirus multiplication protein 2B                     |
| maker-2-augustus-gene-103.4-mRNA-1  | Japonica | NA       |               | Os02g0278700 | OsR498G0203410800.01.T01 | Ent-copalyl diphosphate synthase                          |
| maker-2-augustus-gene-104.0-mRNA-1  | Japonica | NA       |               |              |                          |                                                           |
| maker-2-augustus-gene-104.12-mRNA-1 | Japonica | Japonica |               | Os02g0280700 | OsR498G0611713700.01.T03 | Fe2OG dioxygenase domain-containing protein (Fragment)    |
| maker-2-augustus-gene-104.16-mRNA-1 | Japonica | NA       |               | Os02g0281000 | OsR498G0203419100.01.T05 | Protein-serine/threonine phosphatase                      |
| maker-2-augustus-gene-104.2-mRNA-1  | Japonica | NA       |               | Os02g0280200 | OsR498G0203415300.01.T01 | Xyloglucan endotransglucosylase/hydrolase                 |
| maker-2-augustus-gene-104.20-mRNA-1 | Japonica | NA       |               | Os02g0280100 | OsR498G0203415200.01.T02 | MFAP1 domain-containing protein                           |
| maker-2-augustus-gene-104.22-mRNA-1 | Japonica | Indica   |               | Os05g0230900 | OsR498G0203417000.01.T02 | Glyoxalase I                                              |
| maker-2-augustus-gene-104.23-mRNA-1 | Japonica | Indica   |               | Os05g0230900 | OsR498G0203417000.01.T02 | Glyoxalase I                                              |
| maker-2-augustus-gene-104.6-mRNA-1  | Japonica | NA       |               | Os02g0280400 | OsR498G0203416700.01.T05 | Casein kinase I                                           |
| maker-2-augustus-gene-105.26-mRNA-1 | Japonica | NA       |               |              | OsR498G0203419700.01.T02 | RNI-like superfamily protein isoform 1                    |
| maker-2-augustus-gene-105.32-mRNA-1 | Japonica | Japonica | CC-NBS-TM     | Os02g0281900 | OsR498G0203420100.01.T02 | Disease resistance protein RGA2                           |
| maker-2-augustus-gene-105.34-mRNA-1 | Japonica | NA       |               | Os02g0282100 | OsR498G0203421200.01.T01 | 39S ribosomal protein L53                                 |
| maker-2-augustus-gene-106.0-mRNA-1  | Japonica | NA       |               | Os02g0282900 | OsR498G0203421800.01.T01 | ATP-binding cassette sub-family E member 1                |
| maker-2-augustus-gene-111.39-mRNA-1 | Japonica | NA       |               | Os02g0292100 |                          | GDSL-motif lipase/hydrolase-like                          |
| maker-2-augustus-gene-111.42-mRNA-1 | Japonica | NA       |               | Os02g0292600 | OsR498G0203459900.01.T02 | GDSL esterase/lipase                                      |
| maker-2-augustus-gene-111.54-mRNA-1 | Japonica | NA       |               | Os02g0292800 | OsR498G0203461200.01.T01 | DUF599 domain-containing protein                          |
| maker-2-augustus-gene-112.0-mRNA-1  | Japonica | NA       |               |              | OsR498G0203461500.01.T01 | Factor of DNA methylation 2                               |
| maker-2-augustus-gene-112.10-mRNA-1 | Japonica | Indica   |               | Os01g0886600 | OsR498G0203462400.01.T01 | ATP-dependent Clp protease ATP-binding subunit clpX       |
| maker-2-augustus-gene-112.19-mRNA-1 | Japonica | NA       |               | Os02g0295700 | OsR498G0203464600.01.T03 | Topoisomerase II-associated protein PAT1                  |
| maker-2-augustus-gene-112.2-mRNA-1  | Japonica | Indica   |               | Os02g0293800 | OsR498G0203463300.01.T01 | zf-RVT domain-containing protein                          |
| maker-2-augustus-gene-112.4-mRNA-1  | Japonica | NA       |               |              | OsR498G0203464300.01.T01 | WD repeat-containing protein 26                           |
| maker-2-augustus-gene-112.8-mRNA-1  | Japonica | NA       |               | Os02g0293400 | OsR498G0203461800.01.T01 | RING-type E3 ubiquitin transferase                        |
| maker-2-augustus-gene-113.0-mRNA-1  | Japonica | NA       |               | Os02g0295700 | OsR498G0203474200.01.T03 | Topoisomerase II-associated protein PAT1                  |
| maker-2-augustus-gene-113.3-mRNA-1  | Japonica | NA       |               | Os02g0296300 | OsR498G0203475200.01.T01 |                                                           |
| maker-2-augustus-gene-113.6-mRNA-1  | Japonica | Indica   |               | Os04g0613400 | OsR498G0203475400.01.T01 | CCR4-NOT transcription complex subunit 9-like             |

|                                     |          |          |               |              |                          |                                                              |
|-------------------------------------|----------|----------|---------------|--------------|--------------------------|--------------------------------------------------------------|
| maker-2-augustus-gene-114.30-mRNA-1 | Japonica | NA       |               |              | OsR498G0203722500.01.T01 | Cytokinin inducible protein-like                             |
| maker-2-augustus-gene-114.31-mRNA-1 | Japonica | NA       |               | Os02g0297600 | OsR498G0203478900.01.T06 | Lysine ketoglutarate reductase trans-splicing related 1      |
| maker-2-augustus-gene-114.38-mRNA-1 | Japonica | NA       |               |              | OsR498G0203476400.01.T02 | Cobalamin (Vitamin B12) biosynthesis CbiX                    |
| maker-2-augustus-gene-115.0-mRNA-1  | Japonica | NA       |               | Os02g0299200 | OsR498G0203486100.01.T02 | Calmodulin-binding protein-like                              |
| maker-2-augustus-gene-115.1-mRNA-1  | Japonica | NA       |               | Os02g0299200 | OsR498G0203486100.01.T03 | Calmodulin-binding protein-like                              |
| maker-2-augustus-gene-115.12-mRNA-1 | Japonica | NA       |               | Os02g0299600 | OsR498G0203488400.01.T01 |                                                              |
| maker-2-augustus-gene-115.14-mRNA-1 | Japonica | NA       |               |              |                          | Phosphate synthase-like                                      |
| maker-2-augustus-gene-115.6-mRNA-1  | Japonica | NA       | CC-LRR-NBS-TM |              | OsR498G0203491300.01.T01 | Putative stripe rust resistance protein Yr10                 |
| maker-2-augustus-gene-115.8-mRNA-1  | Japonica | Indica   |               | Os02g0299300 | OsR498G0203486400.01.T02 | AB hydrolase-1 domain-containing protein (Fragment)          |
| maker-2-augustus-gene-116.30-mRNA-1 | Japonica | NA       |               | Os02g0301000 | OsR498G0203494100.01.T01 | Zinc finger CCCH domain-containing protein 1                 |
| maker-2-augustus-gene-116.32-mRNA-1 | Japonica | NA       |               | Os02g0301100 | OsR498G0203495200.01.T02 | Bidirectional sugar transporter SWEET                        |
| maker-2-augustus-gene-117.41-mRNA-1 | Japonica | Indica   |               | Os06g0343100 | OsR498G0203498500.01.T01 | RNA helicase                                                 |
| maker-2-augustus-gene-117.44-mRNA-1 | Japonica | Indica   |               | Os04g0613400 | OsR498G0203500500.01.T01 | CCR4-NOT transcription complex subunit 9                     |
| maker-2-augustus-gene-117.46-mRNA-1 | Japonica | NA       |               | Os02g0302400 |                          | probable aminotransferase TAT2 isoform X3                    |
| maker-2-augustus-gene-117.48-mRNA-1 | Japonica | NA       |               | Os02g0301400 |                          | Zinc finger MYM-type protein 1                               |
| maker-2-augustus-gene-117.50-mRNA-1 | Japonica | NA       | CC-NBS-TM     |              | OsR498G0203501200.01.T03 | LZ-NBS-LRR class RGA                                         |
| maker-2-augustus-gene-117.53-mRNA-1 | Japonica | NA       |               | Os01g0704400 |                          | zf-RVT domain-containing protein                             |
| maker-2-augustus-gene-118.37-mRNA-1 | Japonica | NA       |               | Os02g0302700 | OsR498G0203502900.01.T01 | Tyrosine transaminase family protein isoform 1               |
| maker-2-augustus-gene-118.40-mRNA-1 | Japonica | NA       |               | Os02g0302900 | OsR498G0203503300.01.T02 | Reticulon domain-containing protein (Fragment)               |
| maker-2-augustus-gene-119.11-mRNA-1 | Japonica | NA       |               | Os02g0305600 | OsR498G0203510000.01.T04 |                                                              |
| maker-2-augustus-gene-119.6-mRNA-1  | Japonica | NA       | Kinase-TM     |              |                          | probable serine/threonine-protein kinase At1g54610           |
| maker-2-augustus-gene-119.8-mRNA-1  | Japonica | NA       |               | Os02g0304900 | OsR498G0203508800.01.T01 | Drought-induced 19                                           |
| maker-2-augustus-gene-120.0-mRNA-1  | Japonica | NA       |               | Os02g0306900 | OsR498G0203521900.01.T01 | Heat-shock protein DnaJ                                      |
| maker-2-augustus-gene-120.11-mRNA-1 | Japonica | NA       |               |              | OsR498G0203521800.01.T03 |                                                              |
| maker-2-augustus-gene-120.14-mRNA-1 | Japonica | NA       |               | Os02g0307000 | OsR498G0203522400.01.T02 | GB1/RHD3-type G domain-containing protein (Fragment)         |
| maker-2-augustus-gene-120.2-mRNA-1  | Japonica | NA       |               |              | OsR498G0203524100.01.T01 | DNA excision repair protein like                             |
| maker-2-augustus-gene-120.21-mRNA-1 | Japonica | Japonica |               | Os02g0307300 | OsR498G0102370200.01.T01 | General transcription factor 3C polypeptide 2                |
| maker-2-augustus-gene-120.7-mRNA-1  | Japonica | NA       |               |              | OsR498G0203521400.01.T03 | Nicotianamine aminotransferase A                             |
| maker-2-augustus-gene-121.33-mRNA-1 | Japonica | NA       |               | Os02g0307800 | OsR498G0203525300.01.T01 | Bidirectional sugar transporter SWEET4 (Fragment)            |
| maker-2-augustus-gene-122.0-mRNA-1  | Japonica | NA       |               |              | OsR498G0203533000.01.T01 |                                                              |
| maker-2-augustus-gene-123.0-mRNA-1  | Japonica | NA       |               | Os02g0312500 | OsR498G0203538300.01.T01 | optic atrophy 3 protein homolog                              |
| maker-2-augustus-gene-123.10-mRNA-1 | Japonica | NA       |               | Os02g0312600 | OsR498G0203538600.01.T01 | Rac-like GTP-binding protein 7                               |
| maker-2-augustus-gene-123.15-mRNA-1 | Japonica | Indica   |               | Os02g0312700 | OsR498G0203539200.01.T01 | ATP synthase mitochondrial F1 complex assembly factor        |
| maker-2-augustus-gene-123.18-mRNA-1 | Japonica | NA       |               | Os02g0312800 | OsR498G0203539800.01.T01 | Negative regulator of systemic acquired resistance           |
| maker-2-augustus-gene-123.3-mRNA-1  | Japonica | Indica   |               | Os02g0313400 | OsR498G0203541100.01.T01 | Apoptosis inhibitory                                         |
| maker-2-augustus-gene-124.24-mRNA-1 | Japonica | NA       |               | Os02g0313500 |                          | CHCH domain-containing protein (Fragment)                    |
| maker-2-augustus-gene-124.26-mRNA-1 | Japonica | NA       |               |              | OsR498G0203542100.01.T06 | DDT domain-containing protein                                |
| maker-2-augustus-gene-124.35-mRNA-1 | Japonica | NA       |               | Os02g0313700 | OsR498G0203542600.01.T02 | Calcium-dependent lipid-binding (CaLB domain) family protein |
| maker-2-augustus-gene-124.41-mRNA-1 | Japonica | NA       |               |              |                          | High affinity cationic amino acid transporter 1              |
| maker-2-augustus-gene-124.43-mRNA-1 | Japonica | NA       |               |              |                          | P-type H(+)-exporting transporter                            |
| maker-2-augustus-gene-125.33-mRNA-1 | Japonica | Indica   |               | Os02g0633100 | OsR498G0203550700.01.T03 | B-block binding subunit of TFIIC                             |
| maker-2-augustus-gene-125.35-mRNA-1 | Japonica | NA       |               | Os02g0316200 | OsR498G0203549800.01.T01 | F-boxkelch-repeat protein or23                               |
| maker-2-augustus-gene-126.33-mRNA-1 | Japonica | Indica   |               | Os02g0633100 | OsR498G0203550700.01.T05 |                                                              |
| maker-2-augustus-gene-126.36-mRNA-1 | Japonica | NA       |               | Os02g0317100 | OsR498G0203551300.01.T01 | DUF295 domain-containing protein                             |
| maker-2-augustus-gene-126.38-mRNA-1 | Japonica | NA       |               | Os02g0317400 | OsR498G0203553300.01.T04 | Coatomer subunit zeta                                        |
| maker-2-augustus-gene-126.41-mRNA-1 | Japonica | NA       |               | Os02g0317700 | OsR498G0203553900.01.T02 |                                                              |
| maker-2-augustus-gene-126.45-mRNA-1 | Japonica | Indica   |               | Os02g0318100 | OsR498G0203556100.01.T02 | Ubiquinol oxidase                                            |
| maker-2-augustus-gene-126.49-mRNA-1 | Japonica | NA       |               | Os02g0317500 | OsR498G0203553600.01.T01 | F-box protein SKIP19                                         |
| maker-2-augustus-gene-126.51-mRNA-1 | Japonica | Indica   |               | Os02g0317800 | OsR498G0203555200.01.T01 | Major pollen allergen                                        |
| maker-2-augustus-gene-127.36-mRNA-1 | Japonica | NA       |               | Os02g0319100 | OsR498G0203560900.01.T01 | RNA recognition motif domain-containing protein              |
| maker-2-augustus-gene-127.42-mRNA-1 | Japonica | NA       |               |              |                          | Cysteine dioxygenase                                         |
| maker-2-augustus-gene-127.44-mRNA-1 | Japonica | Japonica |               | Os02g0320300 | OsR498G0203563400.01.T02 | Chalcone--flavonone isomerase                                |
| maker-2-augustus-gene-127.48-mRNA-1 | Japonica | Indica   | NBS-TM        | Os02g0318500 | OsR498G0203559000.01.T05 | PDR-type ABC transporter                                     |
| maker-2-augustus-gene-127.54-mRNA-1 | Japonica | NA       |               |              | OsR498G0203561600.01.T01 | GST C-terminal domain-containing protein (Fragment)          |
| maker-2-augustus-gene-127.58-mRNA-1 | Japonica | NA       |               | Os02g0319800 | OsR498G0203562000.01.T03 | WD repeat-containing protein 25                              |
| maker-2-augustus-gene-127.62-mRNA-1 | Japonica | Indica   |               | Os02g0320100 | OsR498G0203562400.01.T02 | 28S rRNA (Cytosine-C(5))-methyltransferase                   |
| maker-2-augustus-gene-128.35-mRNA-1 | Japonica | Japonica |               | Os02g0320800 | OsR498G0203566300.01.T01 | Fe2OG dioxygenase domain-containing protein (Fragment)       |
| maker-2-augustus-gene-128.39-mRNA-1 | Japonica | NA       |               | Os02g0321500 | OsR498G0203567300.01.T02 | CRAL-TRIO domain-containing protein C3H8.02-like isoform X1  |
| maker-2-augustus-gene-128.44-mRNA-1 | Japonica | NA       |               | Os02g0321800 | OsR498G0203567900.01.T01 | Endoplasmic reticulum transmembrane protein (Fragment)       |
| maker-2-augustus-gene-128.46-mRNA-1 | Japonica | NA       |               | Os02g0321900 | OsR498G0203568300.01.T02 | OVATE domain-containing protein                              |
| maker-2-augustus-gene-129.0-mRNA-1  | Japonica | NA       | Kinase-TM     | Os02g0322400 | OsR498G0203569900.01.T01 | Putative MAPKKK family protein kinase                        |



|                                     |          |          |           |              |                          |                                                                          |
|-------------------------------------|----------|----------|-----------|--------------|--------------------------|--------------------------------------------------------------------------|
| maker-2-augustus-gene-129.1-mRNA-1  | Japonica | NA       |           |              | OsR498G0203571800.01.T01 | Multidrug resistance protein 1, 2, putative                              |
| maker-2-augustus-gene-130.0-mRNA-1  | Japonica | NA       |           | Os02g0324300 | OsR498G0203578100.01.T02 | Nuclear protein-like                                                     |
| maker-2-augustus-gene-130.4-mRNA-1  | Japonica | NA       |           | Os02g0324700 | OsR498G0203580700.01.T01 | Senescence-associated protein                                            |
| maker-2-augustus-gene-130.6-mRNA-1  | Japonica | NA       | CC-NBS-TM | Os02g0325100 | OsR498G0203583700.01.T01 | 26S proteasome regulatory subunit 6B homolog                             |
| maker-2-augustus-gene-131.32-mRNA-1 | Japonica | Japonica |           | Os02g0325401 | OsR498G1119390000.01.T01 | Phosphoglycerate mutase family protein, expressed                        |
| maker-2-augustus-gene-131.34-mRNA-1 | Japonica | NA       |           | Os02g0325600 | OsR498G0203585900.01.T01 | Myb family transcription factor EFM                                      |
| maker-2-augustus-gene-131.38-mRNA-1 | Japonica | NA       |           | Os02g0326200 | OsR498G0203590900.01.T01 | RNA recognition motif (RRM)-containing protein-like                      |
| maker-2-augustus-gene-131.40-mRNA-1 | Japonica | Indica   |           | Os02g0326600 | OsR498G0203591500.01.T01 | ARF guanine-nucleotide exchange factor GNOM                              |
| maker-2-augustus-gene-131.44-mRNA-1 | Japonica | NA       |           | Os02g0326700 | OsR498G0203592300.01.T04 | RHOMBOLD-like protein 9 chloroplastic                                    |
| maker-2-augustus-gene-131.47-mRNA-1 | Japonica | NA       |           | Os02g0327000 | OsR498G0203594100.01.T01 | C2 calcium-dependent membrane targeting                                  |
| maker-2-augustus-gene-131.50-mRNA-1 | Japonica | NA       |           |              | OsR498G0203584200.01.T03 | Plasma membrane ATPase                                                   |
| maker-2-augustus-gene-131.52-mRNA-1 | Japonica | Indica   |           | Os10g0561900 | OsR498G0203584200.01.T04 | Dual-specificity protein-like phosphatase 1                              |
| maker-2-augustus-gene-131.54-mRNA-1 | Japonica | NA       |           | Os02g0326000 | OsR498G0203590400.01.T02 | Putative acyl-activating enzyme 19                                       |
| maker-2-augustus-gene-132.0-mRNA-1  | Japonica | NA       |           |              | OsR498G1120154400.01.T01 | Endonuclease                                                             |
| maker-2-augustus-gene-132.12-mRNA-1 | Japonica | NA       |           | Os02g0327700 | OsR498G0203596400.01.T01 | Protein O-linked-mannose beta-1,4-N-acetylglucosaminyltransferase 2-like |
| maker-2-augustus-gene-132.6-mRNA-1  | Japonica | NA       |           |              | OsR498G1120154400.01.T01 | Retrotransposon protein, putative, Ty3-gypsy sub-class                   |
| maker-2-augustus-gene-132.8-mRNA-1  | Japonica | NA       |           | Os02g0327100 | OsR498G0203594600.01.T01 | ADP-ribosylation factor-like protein 2                                   |
| maker-2-augustus-gene-133.0-mRNA-1  | Japonica | NA       |           | Os02g0328300 | OsR498G0203601100.01.T03 | Fruit protein like                                                       |
| maker-2-augustus-gene-133.11-mRNA-1 | Japonica | NA       |           | Os04g0590366 | OsR498G0203601400.01.T01 | Actin-7                                                                  |
| maker-2-augustus-gene-133.13-mRNA-1 | Japonica | NA       |           |              | OsR498G0407699700.01.T05 |                                                                          |
| maker-2-augustus-gene-133.4-mRNA-1  | Japonica | Indica   |           | Os02g0224900 | OsR498G0203602700.01.T04 | AP-5 complex subunit zeta-1                                              |
| maker-2-augustus-gene-133.6-mRNA-1  | Japonica | NA       |           |              |                          | AUGMIN subunit 6                                                         |
| maker-2-augustus-gene-133.9-mRNA-1  | Japonica | NA       |           | Os02g0329800 | OsR498G0203609300.01.T01 | Glycosyltransferase family 61 protein                                    |
| maker-2-augustus-gene-134.38-mRNA-1 | Japonica | NA       |           | Os02g0330200 | OsR498G0203612300.01.T01 | Glycosyltransferase                                                      |
| maker-2-augustus-gene-134.41-mRNA-1 | Japonica | NA       |           |              |                          |                                                                          |
| maker-2-augustus-gene-135.0-mRNA-1  | Japonica | NA       |           | Os02g0331200 | OsR498G0203614100.01.T05 | Glycosyltransferase, putative, expressed                                 |
| maker-2-augustus-gene-135.3-mRNA-1  | Japonica | Indica   |           | Os08g0387050 | OsR498G0203621100.01.T01 |                                                                          |
| maker-2-augustus-gene-135.6-mRNA-1  | Japonica | NA       |           |              | OsR498G0203614400.01.T01 |                                                                          |
| maker-2-augustus-gene-135.8-mRNA-1  | Japonica | NA       |           | Os02g0332200 | OsR498G0203620800.01.T01 | T-complex protein 1 subunit delta                                        |
| maker-2-augustus-gene-137.8-mRNA-1  | Japonica | NA       |           |              | OsR498G1220780000.01.T03 | Tetratricopeptide repeat (TPR)-like superfamily protein                  |
| maker-2-augustus-gene-140.19-mRNA-1 | Japonica | NA       |           | Os02g0433600 | OsR498G0203625700.01.T04 | BHLH transcription factor                                                |
| maker-2-augustus-gene-141.32-mRNA-1 | Japonica | NA       |           | Os02g0435000 | OsR498G0203632400.01.T01 | Translocation protein SEC62                                              |
| maker-2-augustus-gene-141.38-mRNA-1 | Japonica | NA       |           |              | OsR498G0203633600.01.T04 |                                                                          |
| maker-2-augustus-gene-141.42-mRNA-1 | Japonica | NA       |           | Os02g0436400 | OsR498G0203639000.01.T01 | 4-hydroxy-tetrahydridipicolinate reductase 2 chloroplastic               |
| maker-2-augustus-gene-142.0-mRNA-1  | Japonica | NA       |           | Os02g0438200 | OsR498G0203646900.01.T02 | CDK9 kinase-activating protein cyclin T                                  |
| maker-2-augustus-gene-142.13-mRNA-1 | Japonica | NA       |           |              | OsR498G0203643800.01.T03 | t-SNARE coiled-coil homology domain-containing protein                   |
| maker-2-augustus-gene-142.15-mRNA-1 | Japonica | NA       |           | Os02g0437800 | OsR498G0203645800.01.T07 | Vacuolar protein sorting-associated protein 45 isogeny                   |
| maker-2-augustus-gene-142.5-mRNA-1  | Japonica | Indica   | OsSNAP32  | Os02g0437200 | OsR498G0203643200.01.T06 | SNAPous protein SNAP33                                                   |
| maker-2-augustus-gene-143.0-mRNA-1  | Japonica | NA       |           |              | OsR498G0203648500.01.T01 | Reverse transcriptase Ty1/copia-type domain-containing protein           |
| maker-2-augustus-gene-143.2-mRNA-1  | Japonica | NA       |           | Os02g0439200 | OsR498G0203648900.01.T01 | Putative WEB family protein chloroplastic                                |
| maker-2-augustus-gene-143.4-mRNA-1  | Japonica | NA       |           | Os02g0440000 | OsR498G0203653400.01.T02 | Diaminopimelate decarboxylase                                            |
| maker-2-augustus-gene-144.0-mRNA-1  | Japonica | Indica   |           | Os10g0122600 | OsR498G0203657700.01.T01 | Phosphatidylinositol/phosphatidylcholine transfer protein SFH12-like     |
| maker-2-augustus-gene-146.2-mRNA-1  | Japonica | NA       |           |              |                          | KARI N-terminal Rossmann domain-containing protein                       |
| maker-2-augustus-gene-146.6-mRNA-1  | Japonica | Indica   |           | Os02g0701833 | OsR498G0203665800.01.T01 | ATP-dependent DNA helicase                                               |
| maker-2-augustus-gene-147.0-mRNA-1  | Japonica | NA       |           |              |                          | Transposon protein, putative, CACTA, En/Spm sub-class                    |
| maker-2-augustus-gene-148.0-mRNA-1  | Japonica | NA       |           |              | OsR498G0203677700.01.T01 | SWIM-type domain-containing protein                                      |
| maker-2-augustus-gene-148.3-mRNA-1  | Japonica | NA       |           | Os02g0448400 | OsR498G0203676600.01.T01 | Synaptotagmin-2                                                          |
| maker-2-augustus-gene-151.31-mRNA-1 | Japonica | NA       |           | Os01g0372100 | OsR498G1018392400.01.T01 |                                                                          |
| maker-2-augustus-gene-152.0-mRNA-1  | Japonica | NA       |           | Os02g0452800 |                          | Epimerase domain-containing protein                                      |
| maker-2-augustus-gene-152.1-mRNA-1  | Japonica | NA       |           |              | OsR498G0203707200.01.T05 | SNARE-interacting protein KEULE                                          |
| maker-2-augustus-gene-152.7-mRNA-1  | Japonica | NA       |           | Os02g0453600 | OsR498G0203710800.01.T01 | Glutelin type-B 5                                                        |
| maker-2-augustus-gene-152.9-mRNA-1  | Japonica | Indica   |           | Os08g0114100 | OsR498G0203711000.01.T04 |                                                                          |
| maker-2-augustus-gene-153.32-mRNA-1 | Japonica | NA       |           |              |                          |                                                                          |
| maker-2-augustus-gene-154.38-mRNA-1 | Japonica | Indica   |           | Os07g0165500 | OsR498G0203722500.01.T01 | Cytokinin inducible protein-like                                         |
| maker-2-augustus-gene-154.40-mRNA-1 | Japonica | NA       |           |              | OsR498G0203722700.01.T02 | Glutelin type-A 1                                                        |
| maker-2-augustus-gene-154.43-mRNA-1 | Japonica | Indica   |           | Os02g0456000 | OsR498G0203722400.01.T02 | Component of oligomeric Golgi complex 4                                  |
| maker-2-augustus-gene-154.46-mRNA-1 | Japonica | NA       |           | Os02g0456200 | OsR498G0203723000.01.T05 | Eukaryotic peptide chain release factor GTP-binding subunit ERF3A        |
| maker-2-augustus-gene-154.54-mRNA-1 | Japonica | NA       |           |              |                          | Histone domain-containing protein                                        |
| maker-2-augustus-gene-155.0-mRNA-1  | Japonica | NA       |           | Os02g0458800 |                          | GDSL-motif lipase/hydrolase family protein                               |
| maker-2-augustus-gene-155.2-mRNA-1  | Japonica | NA       |           | Os02g0457500 | OsR498G0203727200.01.T01 | ankyrin repeat domain-containing protein 17-like                         |
| maker-2-augustus-gene-155.4-mRNA-1  | Japonica | NA       |           |              |                          | Sesquiterpene cyclase                                                    |

|                                     |          |          |           |              |                          |                                                                              |
|-------------------------------------|----------|----------|-----------|--------------|--------------------------|------------------------------------------------------------------------------|
| maker-2-augustus-gene-155.6-mRNA-1  | Japonica | NA       |           |              | OsR498G0203733000.01.T02 | Terpene synthase TPS3                                                        |
| maker-2-augustus-gene-156.40-mRNA-1 | Japonica | Indica   |           | Os02g0459800 | OsR498G0203738100.01.T01 |                                                                              |
| maker-2-augustus-gene-156.42-mRNA-1 | Japonica | Japonica |           | Os02g0459300 | OsR498G0203736400.01.T01 | Microtubule-binding protein TANGLED                                          |
| maker-2-augustus-gene-157.2-mRNA-1  | Japonica | Japonica |           | Os02g0462000 | OsR498G0102635500.01.T01 |                                                                              |
| maker-2-augustus-gene-157.4-mRNA-1  | Japonica | NA       |           | Os02g0462800 | OsR498G0203747100.01.T01 | HKT12 transporter                                                            |
| maker-2-augustus-gene-157.6-mRNA-1  | Japonica | NA       |           | Os02g0461900 | OsR498G0203745800.01.T02 | Actin associated protein                                                     |
| maker-2-augustus-gene-157.9-mRNA-1  | Japonica | NA       |           |              |                          | Putative extracellular ribonuclease                                          |
| maker-2-augustus-gene-158.2-mRNA-1  | Japonica | NA       |           |              | OsR498G0203749800.01.T03 | Carboxypeptidase                                                             |
| maker-2-augustus-gene-162.21-mRNA-1 | Japonica | NA       |           | Os02g0471300 | OsR498G0203781300.01.T02 | 3-hydroxybenzoate 6-hydroxylase 1                                            |
| maker-2-augustus-gene-162.25-mRNA-1 | Japonica | NA       |           |              |                          | C2 domain-containing protein                                                 |
| maker-2-augustus-gene-162.31-mRNA-1 | Japonica | NA       |           | Os02g0471500 | OsR498G0203782000.01.T01 | Catalytic/protein phosphatase type 2C                                        |
| maker-2-augustus-gene-163.26-mRNA-1 | Japonica | NA       | Kinase-TM | Os02g0472700 | OsR498G0203785700.01.T05 | Putative pathogenesis-related protein 1                                      |
| maker-2-augustus-gene-163.30-mRNA-1 | Japonica | NA       |           |              |                          |                                                                              |
| maker-2-augustus-gene-163.32-mRNA-1 | Japonica | NA       |           |              | OsR498G0917607000.01.T01 |                                                                              |
| maker-2-augustus-gene-163.34-mRNA-1 | Japonica | NA       |           | Os02g0473000 | OsR498G0203786400.01.T03 | 5-amino-6-(5-phosphoribosylamino)uracil reductase                            |
| maker-2-augustus-gene-163.39-mRNA-1 | Japonica | Japonica |           | Os02g0473200 | OsR498G0203787200.01.T04 | Peptidase A1 domain-containing protein                                       |
| maker-2-augustus-gene-164.0-mRNA-1  | Japonica | NA       |           |              | OsR498G0203789900.01.T01 | DNA topoisomerase                                                            |
| maker-2-augustus-gene-164.9-mRNA-1  | Japonica | NA       |           |              |                          | Importin N-terminal domain-containing protein (Fragment)                     |
| maker-2-augustus-gene-165.23-mRNA-1 | Japonica | NA       |           | Os02g0475300 | OsR498G0203794900.01.T02 | MACPF domain-containing protein isoform X1                                   |
| maker-2-augustus-gene-165.28-mRNA-1 | Japonica | NA       |           | Os02g0475400 | OsR498G0203795300.01.T02 | Sodium/metabolite cotransporter like                                         |
| maker-2-augustus-gene-166.0-mRNA-1  | Japonica | NA       |           |              | OsR498G0203801600.01.T02 | Brevis plant1                                                                |
| maker-2-augustus-gene-173.3-mRNA-1  | Japonica | NA       |           |              | OsR498G0203840000.01.T02 | Probable UDP-N-acetylglucosamine--peptide N-acetylglucosaminyltransferase    |
| maker-2-augustus-gene-174.35-mRNA-1 | Japonica | NA       |           | Os02g0489800 |                          | Kinesin-like protein KIN-12A                                                 |
| maker-2-augustus-gene-174.38-mRNA-1 | Japonica | NA       |           | Os02g0490000 | OsR498G0203841100.01.T01 | RING-type E3 ubiquitin transferase                                           |
| maker-2-augustus-gene-174.40-mRNA-1 | Japonica | NA       |           | Os02g0490500 | OsR498G0203842300.01.T01 | UDP-glucuronosyl/UDP-glucosyltransferase                                     |
| maker-2-augustus-gene-174.42-mRNA-1 | Japonica | Indica   |           | Os02g0491700 | OsR498G0203848100.01.T01 |                                                                              |
| maker-2-augustus-gene-174.45-mRNA-1 | Japonica | NA       |           | Os02g0491400 | OsR498G0203847400.01.T01 | Peptidylprolyl isomerase                                                     |
| maker-2-augustus-gene-174.50-mRNA-1 | Japonica | NA       |           | Os02g0491600 | OsR498G0203847800.01.T01 |                                                                              |
| maker-2-augustus-gene-175.31-mRNA-1 | Japonica | NA       |           |              |                          | Kinase D-interacting substrate of 220 kDa                                    |
| maker-2-augustus-gene-175.33-mRNA-1 | Japonica | Indica   |           | Os02g0494400 | OsR498G0203851400.01.T01 | Putative ribosomal RNA apurinic site specific lyase                          |
| maker-2-augustus-gene-175.35-mRNA-1 | Japonica | Indica   |           | Os02g0493300 | OsR498G0203851600.01.T03 | Ankyrin-2                                                                    |
| maker-2-augustus-gene-175.37-mRNA-1 | Japonica | NA       |           | Os02g0492900 | OsR498G0203852200.01.T01 | Ankyrin-like protein-like protein                                            |
| maker-2-augustus-gene-175.41-mRNA-1 | Japonica | Indica   |           | Os02g0493050 | OsR498G0203852400.01.T02 | Serine/threonine-protein phosphatase 6 regulatory ankyrin repeat subunit B   |
| maker-2-augustus-gene-176.0-mRNA-1  | Japonica | NA       |           |              |                          | Cortactin-binding protein 2                                                  |
| maker-2-augustus-gene-176.11-mRNA-1 | Japonica | Japonica |           | Os02g0493300 | OsR498G0203853000.01.T02 | Serine/threonine-protein phosphatase 6 regulatory ankyrin repeat subunit B   |
| maker-2-augustus-gene-176.12-mRNA-1 | Japonica | NA       |           | Os02g0493300 | OsR498G0203853000.01.T05 | Ankyrin-like protein-like protein                                            |
| maker-2-augustus-gene-176.21-mRNA-1 | Japonica | Indica   |           | Os02g0494400 | OsR498G0203854200.01.T03 | Putative ribosomal RNA apurinic site specific lyase                          |
| maker-2-augustus-gene-176.22-mRNA-1 | Japonica | Japonica |           | Os02g0494400 | OsR498G0203857500.01.T02 | Putative ribosomal RNA apurinic site specific lyase                          |
| maker-2-augustus-gene-176.6-mRNA-1  | Japonica | NA       |           | Os02g0494700 |                          | Repressor of silencing 3                                                     |
| maker-2-augustus-gene-176.8-mRNA-1  | Japonica | Indica   |           | Os06g0492900 | OsR498G0203852800.01.T02 | Putative ribosomal RNA apurinic site specific lyase                          |
| maker-2-augustus-gene-177.0-mRNA-1  | Japonica | NA       |           |              |                          | Transcription factor bHLH14                                                  |
| maker-2-augustus-gene-177.12-mRNA-1 | Japonica | NA       |           |              |                          | BED-type domain-containing protein                                           |
| maker-2-augustus-gene-177.2-mRNA-1  | Japonica | NA       |           | Os02g0496100 | OsR498G0203858900.01.T01 | Heat shock transcription factor                                              |
| maker-2-augustus-gene-177.4-mRNA-1  | Japonica | Japonica |           | Os02g0496500 | OsR498G0203859700.01.T06 | Transcriptional activator DEMETER                                            |
| maker-2-augustus-gene-178.0-mRNA-1  | Japonica | Indica   |           | Os02g0498300 | OsR498G0203864300.01.T02 | Probable magnesium transporter                                               |
| maker-2-augustus-gene-178.13-mRNA-1 | Japonica | Indica   |           | Os04g0372800 | OsR498G0203864000.01.T01 | Nuclear transport factor 2 (NTF2) family protein with RNA binding (RRM-RBD)  |
| maker-2-augustus-gene-178.17-mRNA-1 | Japonica | NA       |           | Os02g0498700 | OsR498G0203866200.01.T01 | Hexosyltransferase                                                           |
| maker-2-augustus-gene-178.7-mRNA-1  | Japonica | NA       |           | Os02g0497500 | OsR498G0203863600.01.T02 | DNA repair protein RAD50                                                     |
| maker-2-augustus-gene-179.30-mRNA-1 | Japonica | NA       |           |              | OsR498G0203867900.01.T01 | Ethylene-responsive transcription factor-like protein At4g13040              |
| maker-2-augustus-gene-181.0-mRNA-1  | Japonica | Indica   |           | Os09g0441400 | OsR498G0203881300.01.T01 | Flavonoid 3'-monooxygenase                                                   |
| maker-2-augustus-gene-182.28-mRNA-1 | Japonica | NA       | CC-NBS-TM |              | OsR498G0203882300.01.T01 | CC-NBS-LRR type disease resistance protein NLR2-V                            |
| maker-2-augustus-gene-182.32-mRNA-1 | Japonica | Japonica |           | Os02g0503700 | OsR498G0203882700.01.T01 | Isoflavone 2'-hydroxylase                                                    |
| maker-2-augustus-gene-183.11-mRNA-1 | Japonica | Indica   |           | Os02g0504800 | OsR498G0203887400.01.T01 | Acyl-[acyl-carrier-protein] desaturase                                       |
| maker-2-augustus-gene-183.6-mRNA-1  | Japonica | Japonica |           | Os02g0504700 | OsR498G0203887100.01.T01 | AvrRpt-cleavage domain-containing protein (Fragment)                         |
| maker-2-augustus-gene-183.9-mRNA-1  | Japonica | NA       |           |              | OsR498G0203891300.01.T01 |                                                                              |
| maker-2-augustus-gene-184.0-mRNA-1  | Japonica | NA       |           | Os02g0506500 |                          | Ubiquitin-like modifier-activating enzyme 5                                  |
| maker-2-augustus-gene-184.2-mRNA-1  | Japonica | NA       |           | Os02g0506400 | OsR498G0203893200.01.T01 | Putative F-box domain, Zinc finger, MYND-type, tetratricopeptide-like helica |
| maker-2-augustus-gene-184.4-mRNA-1  | Japonica | NA       |           |              | OsR498G0815948900.01.T01 | Transposon protein, putative, CACTA, En/Spm sub-class                        |
| maker-2-augustus-gene-185.0-mRNA-1  | Japonica | NA       |           | Os02g0507400 | OsR498G0203899300.01.T01 | Fibrous sheath-interacting protein                                           |
| maker-2-augustus-gene-185.15-mRNA-1 | Japonica | NA       |           | Os02g0510300 | OsR498G0203903800.01.T02 | Proline-rich protein HaellI subfamily 1                                      |
| maker-2-augustus-gene-190.3-mRNA-1  | Japonica | NA       | LRR-TM    |              |                          |                                                                              |

|                                     |          |          |           |              |                          |                                                                         |
|-------------------------------------|----------|----------|-----------|--------------|--------------------------|-------------------------------------------------------------------------|
| maker-2-augustus-gene-192.41-mRNA-1 | Japonica | NA       |           | Os05g0471800 |                          | Far-red impaired response protein-like                                  |
| maker-2-augustus-gene-192.48-mRNA-1 | Japonica | NA       |           |              |                          | ZF-HD dimerization-type domain-containing protein                       |
| maker-2-augustus-gene-194.1-mRNA-1  | Japonica | NA       |           |              |                          | Putative AC transposase                                                 |
| maker-2-augustus-gene-194.11-mRNA-1 | Japonica | NA       |           | Os02g0521700 | OsR498G0203955900.01.T01 | Acyl-CoA thioesterase, putative                                         |
| maker-2-augustus-gene-194.15-mRNA-1 | Japonica | NA       |           | Os02g0520800 | OsR498G0203954000.01.T01 | Cytochrome b-c1 complex subunit Rieske, mitochondrial                   |
| maker-2-augustus-gene-194.17-mRNA-1 | Japonica | NA       |           |              | OsR498G0203954400.01.T01 | Ethylene-responsive transcription factor ERF115                         |
| maker-2-augustus-gene-194.19-mRNA-1 | Japonica | NA       |           | Os02g0521300 | OsR498G0203954800.01.T04 | Calcium-dependent phospholipid-binding Copine family protein (Fragment) |
| maker-2-augustus-gene-194.3-mRNA-1  | Japonica | NA       |           |              | OsR498G0203955500.01.T03 | Ubiquitinyl hydrolase 1                                                 |
| maker-2-augustus-gene-194.7-mRNA-1  | Japonica | NA       |           |              | OsR498G0203955700.01.T02 | Ubiquitinyl hydrolase 1                                                 |
| maker-2-augustus-gene-195.35-mRNA-1 | Japonica | NA       |           |              |                          | Ubiquitinyl hydrolase 1                                                 |
| maker-2-augustus-gene-195.41-mRNA-1 | Japonica | NA       |           | Os02g0523300 | OsR498G0203961600.01.T02 | Gamma-tubulin complex component                                         |
| maker-2-augustus-gene-195.49-mRNA-1 | Japonica | NA       |           | Os02g0523500 | OsR498G0203961800.01.T03 | Ribonuclease                                                            |
| maker-2-augustus-gene-196.0-mRNA-1  | Japonica | NA       |           |              | OsR498G0203969700.01.T05 | Adenylyltransferase and sulfurtransferase MOC53                         |
| maker-2-augustus-gene-199.12-mRNA-1 | Japonica | NA       |           |              |                          | Voltage-dependent anion channel                                         |
| maker-2-augustus-gene-2.37-mRNA-1   | Japonica | NA       |           | Os02g0103600 | OsR498G0202807200.01.T01 | Ferredoxin--NADP(+) reductase                                           |
| maker-2-augustus-gene-2.39-mRNA-1   | Japonica | NA       |           | Os02g0103700 | OsR498G0202807400.01.T01 | 60S ribosomal protein L9                                                |
| maker-2-augustus-gene-2.41-mRNA-1   | Japonica | NA       |           | Os02g0103800 | OsR498G0202807600.01.T01 | Ferredoxin--NADP reductase, chloroplastic                               |
| maker-2-augustus-gene-2.44-mRNA-1   | Japonica | NA       |           | Os02g0103900 | OsR498G0202807800.01.T01 | U3 small nuclear RNA-associated protein 6 isogeny                       |
| maker-2-augustus-gene-2.47-mRNA-1   | Japonica | Indica   |           | Os02g0104500 | OsR498G0202810200.01.T01 | Trihelix transcription factor GT-2                                      |
| maker-2-augustus-gene-20.59-mRNA-1  | Japonica | NA       |           | Os02g0137800 | OsR498G0202927100.01.T01 | Guanine nucleotide-binding protein subunit gamma 2                      |
| maker-2-augustus-gene-21.34-mRNA-1  | Japonica | NA       |           |              | OsR498G0202932700.01.T04 | Vacuolar cation/proton exchanger                                        |
| maker-2-augustus-gene-21.38-mRNA-1  | Japonica | NA       |           | Os02g0139300 | OsR498G0202934300.01.T01 | Glucan endo-1,3-beta-D-glucosidase                                      |
| maker-2-augustus-gene-21.40-mRNA-1  | Japonica | Indica   |           | Os06g0703500 | OsR498G0202935500.01.T01 | Squamosa promoter-binding-like protein 3                                |
| maker-2-augustus-gene-21.43-mRNA-1  | Japonica | NA       |           |              | OsR498G0202936700.01.T04 | Aspartyl-tRNA synthetase                                                |
| maker-2-augustus-gene-21.48-mRNA-1  | Japonica | NA       |           | Os02g0139000 | OsR498G0202933000.01.T03 | Protein PHOSPHATE STARVATION RESPONSE 3                                 |
| maker-2-augustus-gene-21.61-mRNA-1  | Japonica | NA       |           |              |                          | Cycloartenol synthase                                                   |
| maker-2-augustus-gene-21.70-mRNA-1  | Japonica | NA       |           | Os02g0139700 | OsR498G0202937000.01.T01 | Cycloartenol synthase                                                   |
| maker-2-augustus-gene-21.76-mRNA-1  | Japonica | NA       |           |              |                          | Terpene cyclase/mutase family member                                    |
| maker-2-augustus-gene-210.34-mRNA-1 | Japonica | NA       | Kinase-TM | Os02g0549200 | OsR498G0204084500.01.T02 | probable serine/threonine-protein kinase At1g01540                      |
| maker-2-augustus-gene-211.0-mRNA-1  | Japonica | NA       |           | Os02g0549600 | OsR498G0204085100.01.T01 | Ribosomal protein S10                                                   |
| maker-2-augustus-gene-211.11-mRNA-1 | Japonica | NA       |           | Os02g0550300 | OsR498G0204089100.01.T01 | Thioredoxin                                                             |
| maker-2-augustus-gene-211.14-mRNA-1 | Japonica | NA       |           | Os02g0550100 | OsR498G0204088600.01.T01 | V-type proton ATPase proteolipid subunit                                |
| maker-2-augustus-gene-211.16-mRNA-1 | Japonica | NA       |           | Os02g0550600 | OsR498G0204090800.01.T02 | Alkaline/neutral invertase                                              |
| maker-2-augustus-gene-211.18-mRNA-1 | Japonica | Indica   |           | Os02g0550700 | OsR498G0204091600.01.T02 | Exosome complex component RRP45B like                                   |
| maker-2-augustus-gene-211.4-mRNA-1  | Japonica | NA       | CC-NBS    |              | OsR498G0204086500.01.T01 |                                                                         |
| maker-2-augustus-gene-211.8-mRNA-1  | Japonica | NA       |           | Os02g0550000 | OsR498G0204088100.01.T01 |                                                                         |
| maker-2-augustus-gene-212.0-mRNA-1  | Japonica | NA       |           | Os02g0550800 | OsR498G0204091900.01.T02 | Ammonium transporter                                                    |
| maker-2-augustus-gene-212.12-mRNA-1 | Japonica | NA       | Kinase-TM | Os02g0551100 | OsR498G0204092600.01.T02 | Serine/threonine-protein kinase SAPK7                                   |
| maker-2-augustus-gene-212.18-mRNA-1 | Japonica | NA       |           | Os02g0551400 | OsR498G0204093800.01.T02 | HTH myb-type domain-containing protein                                  |
| maker-2-augustus-gene-212.22-mRNA-1 | Japonica | NA       |           |              | OsR498G0204095000.01.T01 | Zinc finger protein Pegasus                                             |
| maker-2-augustus-gene-212.3-mRNA-1  | Japonica | NA       |           | Os02g0551900 |                          | zinc finger transcription factor YY1                                    |
| maker-2-augustus-gene-212.5-mRNA-1  | Japonica | NA       |           | Os02g0552000 | OsR498G0204096700.01.T01 | Transmembrane 9 superfamily member                                      |
| maker-2-augustus-gene-213.32-mRNA-1 | Japonica | NA       |           |              | OsR498G0204101300.01.T01 | Tetratricopeptide repeat protein like                                   |
| maker-2-augustus-gene-213.35-mRNA-1 | Japonica | NA       |           | Os02g0553600 | OsR498G0204101700.01.T02 | RNA polymerase II transcriptional coactivator KIWI like                 |
| maker-2-augustus-gene-213.44-mRNA-1 | Japonica | NA       |           | Os02g0554100 | OsR498G0204103500.01.T01 | Ultraviolet-B receptor like                                             |
| maker-2-augustus-gene-213.50-mRNA-1 | Japonica | NA       |           | Os02g0553200 | OsR498G0204100600.01.T01 | Thylakoid-bound ascorbate peroxidase                                    |
| maker-2-augustus-gene-214.29-mRNA-1 | Japonica | NA       |           | Os02g0554400 |                          |                                                                         |
| maker-2-augustus-gene-214.33-mRNA-1 | Japonica | NA       |           | Os02g0555300 | OsR498G0204107300.01.T02 | NAC transcription factor                                                |
| maker-2-augustus-gene-214.36-mRNA-1 | Japonica | NA       |           | Os02g0555600 | OsR498G0204107700.01.T05 | ACT domain repeat 3                                                     |
| maker-2-augustus-gene-214.41-mRNA-1 | Japonica | Japonica |           | Os02g0554900 | OsR498G0204106600.01.T01 | Protein disulfide-isomerase                                             |
| maker-2-augustus-gene-214.43-mRNA-1 | Japonica | NA       |           | Os02g0555000 | OsR498G0204106800.01.T03 | GPN-loop GTPase 2                                                       |
| maker-2-augustus-gene-214.47-mRNA-1 | Japonica | NA       |           |              |                          |                                                                         |
| maker-2-augustus-gene-214.50-mRNA-1 | Japonica | NA       |           | Os02g0555700 | OsR498G0204108000.01.T02 | DnaJ domain                                                             |
| maker-2-augustus-gene-214.54-mRNA-1 | Japonica | NA       | Kinase-TM | Os02g0555900 | OsR498G0204108200.01.T03 | Mitogen-activated protein kinase kinase kinase YODA                     |
| maker-2-augustus-gene-214.60-mRNA-1 | Japonica | NA       |           | Os02g0556000 | OsR498G0204108600.01.T01 | Hexosyltransferase                                                      |
| maker-2-augustus-gene-215.32-mRNA-1 | Japonica | Japonica |           | Os02g0556100 | OsR498G0204109300.01.T01 | Catalytic/ coenzyme binding protein                                     |
| maker-2-augustus-gene-215.38-mRNA-1 | Japonica | NA       |           | Os02g0556700 | OsR498G0204110300.01.T01 | T-complex protein 11                                                    |
| maker-2-augustus-gene-215.41-mRNA-1 | Japonica | NA       |           | Os02g0557100 | OsR498G0204111700.01.T02 | AIG1-type G domain-containing protein (Fragment)                        |
| maker-2-augustus-gene-215.43-mRNA-1 | Japonica | NA       |           | Os02g0557200 | OsR498G0204112700.01.T01 | Auxin response factor                                                   |
| maker-2-augustus-gene-215.49-mRNA-1 | Japonica | Indica   |           | Os02g0557500 | OsR498G0204113100.01.T01 | zinc finger CCH domain-containing protein 5                             |
| maker-2-augustus-gene-215.54-mRNA-1 | Japonica | NA       |           | Os02g0557700 | OsR498G0204113500.01.T01 | NADPH-dependent pterin aldehyde reductase                               |

|                                     |          |          |              |               |                          |                                                                             |
|-------------------------------------|----------|----------|--------------|---------------|--------------------------|-----------------------------------------------------------------------------|
| maker-2-augustus-gene-215.58-mRNA-1 | Japonica | NA       |              |               | OsR498G0204109800.01.T03 | tRNA guanine10-N2-methyltransferase                                         |
| maker-2-augustus-gene-215.65-mRNA-1 | Japonica | NA       |              |               | OsR498G0204110200.01.T02 | SPLa/Ryanodine receptor (SPRY) domain-containing protein                    |
| maker-2-augustus-gene-215.70-mRNA-1 | Japonica | NA       |              | Os02g05556800 | OsR498G0204110800.01.T01 | protein MAINTENANCE OF PSII UNDER HIGH LIGHT 1                              |
| maker-2-augustus-gene-215.72-mRNA-1 | Japonica | NA       |              | Os02g05556900 | OsR498G0204111200.01.T01 | DDT transcription factor                                                    |
| maker-2-augustus-gene-215.75-mRNA-1 | Japonica | NA       |              | Os02g05557300 | OsR498G0204113000.01.T01 | Ring-h2 finger protein at158                                                |
| maker-2-augustus-gene-215.77-mRNA-1 | Japonica | NA       |              | Os02g05557600 | OsR498G0204113400.01.T02 | Ligatin                                                                     |
| maker-2-augustus-gene-215.80-mRNA-1 | Japonica | Japonica |              | Os02g05557800 | OsR498G0204113800.01.T02 | Two-component response regulator ARR16                                      |
| maker-2-augustus-gene-216.0-mRNA-1  | Japonica | NA       | CC-NBS-TM    |               | OsR498G0204117300.01.T01 | Disease resistance protein RPM1                                             |
| maker-2-augustus-gene-216.10-mRNA-1 | Japonica | Indica   |              | Os02g05558500 | OsR498G0204117800.01.T01 |                                                                             |
| maker-2-augustus-gene-216.12-mRNA-1 | Japonica | NA       |              | Os02g05558600 | OsR498G0204118000.01.T02 | TPX2 (Targeting protein for Xklp2) protein family                           |
| maker-2-augustus-gene-216.17-mRNA-1 | Japonica | NA       |              | Os02g05559400 | OsR498G0204120400.01.T05 | 12-oxophytodienoate reductase                                               |
| maker-2-augustus-gene-216.2-mRNA-1  | Japonica | NA       | CC-Kinase-TM | Os02g05559300 | OsR498G0204120100.01.T02 | Putative serine/threonine-protein kinase                                    |
| maker-2-augustus-gene-216.5-mRNA-1  | Japonica | Indica   |              | Os02g05558100 | OsR498G0204116600.01.T04 | Chloride channel protein CLC-c                                              |
| maker-2-augustus-gene-217.0-mRNA-1  | Japonica | Indica   |              | Os02g04711300 | OsR498G0204121100.01.T04 | Monooxygenase 1                                                             |
| maker-2-augustus-gene-217.11-mRNA-1 | Japonica | Indica   |              | Os02g0562400  | OsR498G0204123800.01.T01 | Ankyrin repeat-containing domain-containing protein                         |
| maker-2-augustus-gene-217.13-mRNA-1 | Japonica | NA       |              |               | OsR498G0204124000.01.T05 |                                                                             |
| maker-2-augustus-gene-217.2-mRNA-1  | Japonica | NA       |              | Os02g0562300  | OsR498G0204123500.01.T03 | Calmodulin binding protein1                                                 |
| maker-2-augustus-gene-217.7-mRNA-1  | Japonica | NA       |              | Os02g0562700  | OsR498G0204125300.01.T04 | Glyoxylate reductase 1                                                      |
| maker-2-augustus-gene-218.0-mRNA-1  | Japonica | Indica   |              | Os04g0444900  | OsR498G0204130100.01.T01 | PHD finger protein Alfin1                                                   |
| maker-2-augustus-gene-218.11-mRNA-1 | Japonica | NA       |              | Os02g0565100  | OsR498G0204131700.01.T04 | Nucleoside diphosphate kinase                                               |
| maker-2-augustus-gene-218.15-mRNA-1 | Japonica | NA       |              | Os02g0564000  | OsR498G0204130000.01.T03 | Glutathione S-transferase                                                   |
| maker-2-augustus-gene-218.21-mRNA-1 | Japonica | NA       |              | Os02g0564500  | OsR498G0204130800.01.T01 | Vesicle transport protein (Fragment)                                        |
| maker-2-augustus-gene-218.26-mRNA-1 | Japonica | NA       |              | Os02g0565200  | OsR498G0204132400.01.T02 | Signal peptidase complex subunit 2                                          |
| maker-2-augustus-gene-218.4-mRNA-1  | Japonica | Indica   |              | Os01g0886600  | OsR498G0204130500.01.T01 | AAA+ ATPase domain                                                          |
| maker-2-augustus-gene-218.9-mRNA-1  | Japonica | NA       |              |               | OsR498G0204130900.01.T01 | protein SENESCENCE-ASSOCIATED GENE 21, mitochondrial-like                   |
| maker-2-augustus-gene-219.0-mRNA-1  | Japonica | NA       |              | Os02g0566400  | OsR498G0204135900.01.T01 | Extracellular ligand-gated ion channel                                      |
| maker-2-augustus-gene-219.12-mRNA-1 | Japonica | NA       |              | Os02g0566900  | OsR498G0204137200.01.T01 | Transmembrane protein 50                                                    |
| maker-2-augustus-gene-219.14-mRNA-1 | Japonica | NA       |              | Os02g0567000  | OsR498G0204137400.01.T01 | Salt tolerant protein                                                       |
| maker-2-augustus-gene-219.16-mRNA-1 | Japonica | NA       |              | Os02g0567100  | OsR498G0204137600.01.T02 | Thioredoxin-like 4, chloroplastic                                           |
| maker-2-augustus-gene-219.18-mRNA-1 | Japonica | NA       |              | Os02g0567200  | OsR498G0204138000.01.T04 | PPM-type phosphatase domain-containing protein                              |
| maker-2-augustus-gene-219.2-mRNA-1  | Japonica | NA       |              | Os02g0566700  | OsR498G0204136700.01.T01 |                                                                             |
| maker-2-augustus-gene-219.5-mRNA-1  | Japonica | NA       |              | Os02g0565600  | OsR498G0204133800.01.T01 | Homeodomain leucine-zipper protein Hox7                                     |
| maker-2-augustus-gene-219.7-mRNA-1  | Japonica | NA       |              | Os02g0566500  | OsR498G0204136200.01.T02 | WRKY domain-containing protein                                              |
| maker-2-augustus-gene-219.8-mRNA-1  | Japonica | Indica   |              | Os09g0452900  | OsR498G0204137000.01.T01 | Hexosyltransferase                                                          |
| maker-2-augustus-gene-22.32-mRNA-1  | Japonica | NA       |              | Os02g0140400  | OsR498G0202938800.01.T03 | Camelliol C synthase                                                        |
| maker-2-augustus-gene-22.44-mRNA-1  | Japonica | NA       |              | Os02g0141300  | OsR498G0202943400.01.T02 | GHMP kinase N-terminal domain                                               |
| maker-2-augustus-gene-22.51-mRNA-1  | Japonica | NA       |              | Os02g0141500  | OsR498G0202944200.01.T01 |                                                                             |
| maker-2-augustus-gene-220.40-mRNA-1 | Japonica | Indica   |              | Os04g0449900  | OsR498G0204139900.01.T02 | Polyadenylate-binding protein RBP47                                         |
| maker-2-augustus-gene-220.44-mRNA-1 | Japonica | NA       |              | Os02g0568200  | OsR498G0204140800.01.T01 | Coleoptile phototropism protein 1                                           |
| maker-2-augustus-gene-220.46-mRNA-1 | Japonica | NA       |              |               | OsR498G0204142600.01.T01 | Terpene synthase family, metal binding domain containing protein, expressed |
| maker-2-augustus-gene-220.48-mRNA-1 | Japonica | NA       |              |               | OsR498G0204142800.01.T01 | Ent-kaurene synthase                                                        |
| maker-2-augustus-gene-220.49-mRNA-1 | Japonica | NA       |              |               | OsR498G1119549200.01.T02 |                                                                             |
| maker-2-augustus-gene-221.0-mRNA-1  | Japonica | NA       |              |               |                          | Ent-cassa-12,15-diene synthase                                              |
| maker-2-augustus-gene-221.6-mRNA-1  | Japonica | NA       |              | Os02g0570500  | OsR498G0204148100.01.T01 | Ent-isokaurene C2-hydroxylase                                               |
| maker-2-augustus-gene-222.33-mRNA-1 | Japonica | Indica   |              | Os02g0571300  | OsR498G0204152600.01.T01 | Ent-isokaurene synthase                                                     |
| maker-2-augustus-gene-222.34-mRNA-1 | Japonica | NA       |              | Os02g0571800  | OsR498G0204152600.01.T02 | Ent-isokaurene synthase                                                     |
| maker-2-augustus-gene-223.0-mRNA-1  | Japonica | NA       |              | Os02g0573200  | OsR498G0204159700.01.T01 | Photolyase/cryptochrome alpha/beta domain-containing protein                |
| maker-2-augustus-gene-223.14-mRNA-1 | Japonica | NA       |              | Os02g0573400  | OsR498G0204160200.01.T01 | Ubiquitin carboxyl-terminal hydrolase                                       |
| maker-2-augustus-gene-223.3-mRNA-1  | Japonica | NA       |              | Os02g0572400  | OsR498G0204155800.01.T02 | GTP cyclohydrolase II                                                       |
| maker-2-augustus-gene-223.6-mRNA-1  | Japonica | NA       |              | Os02g0572600  | OsR498G0204156800.01.T01 | Myosin heavy chain-related protein                                          |
| maker-2-augustus-gene-223.9-mRNA-1  | Japonica | NA       |              |               | OsR498G0204160000.01.T04 | Nucleotide-sugar transporter/ sugar porter                                  |
| maker-2-augustus-gene-224.36-mRNA-1 | Japonica | NA       |              | Os02g0573500  | OsR498G0204160900.01.T01 | Sugar transport protein 5                                                   |
| maker-2-augustus-gene-224.38-mRNA-1 | Japonica | NA       |              | Os02g0574100  | OsR498G0204161900.01.T01 | Sugar transport protein 5                                                   |
| maker-2-augustus-gene-224.41-mRNA-1 | Japonica | NA       |              | Os02g0574100  | OsR498G0204162100.01.T01 | Sugar transport protein 5                                                   |
| maker-2-augustus-gene-224.43-mRNA-1 | Japonica | NA       |              | Os02g0575500  | OsR498G0204166100.01.T02 | Protein ACTIVITY OF BC1 COMPLEX KINASE 8, chloroplastic isoform A           |
| maker-2-augustus-gene-224.47-mRNA-1 | Japonica | NA       |              | Os02g0574500  | OsR498G0204163400.01.T02 | Sugar transport protein 5                                                   |
| maker-2-augustus-gene-224.49-mRNA-1 | Japonica | NA       |              | Os02g0574600  | OsR498G0204164000.01.T04 | Putative hematological and neurological expressed 1-like                    |
| maker-2-augustus-gene-224.52-mRNA-1 | Japonica | NA       |              | Os02g0575200  | OsR498G0204165800.01.T01 | Phosphopantothenate--cysteine ligase                                        |
| maker-2-augustus-gene-225.0-mRNA-1  | Japonica | NA       |              | Os02g0575800  | OsR498G0204167100.01.T01 | Aldose 1-epimerase                                                          |
| maker-2-augustus-gene-225.14-mRNA-1 | Japonica | NA       |              | Os02g0577100  | OsR498G0204171000.01.T04 | Zinc finger, RING-CH-type                                                   |
| maker-2-augustus-gene-225.5-mRNA-1  | Japonica | NA       |              |               |                          |                                                                             |

|                                     |          |          |        |              |                          |                                                                     |
|-------------------------------------|----------|----------|--------|--------------|--------------------------|---------------------------------------------------------------------|
| maker-2-augustus-gene-225.7-mRNA-1  | Japonica | NA       |        | Os02g0576600 | OsR498G0204170400.01.T01 | Sucrose Transporter                                                 |
| maker-2-augustus-gene-225.9-mRNA-1  | Japonica | NA       |        | Os02g0576700 | OsR498G0204170600.01.T01 | Nucleosome/chromatin assembly factor A                              |
| maker-2-augustus-gene-226.40-mRNA-1 | Japonica | NA       |        | Os02g0577300 | OsR498G0204171700.01.T03 | Galectin domain-containing protein                                  |
| maker-2-augustus-gene-226.44-mRNA-1 | Japonica | NA       |        | Os02g0577700 | OsR498G0204172300.01.T01 | Glycosyltransferase                                                 |
| maker-2-augustus-gene-226.46-mRNA-1 | Japonica | Indica   |        | Os02g0578100 | OsR498G0204172500.01.T01 | Glycosyltransferase                                                 |
| maker-2-augustus-gene-226.48-mRNA-1 | Japonica | NA       |        | Os02g0578300 | OsR498G0204173100.01.T01 | Glycosyltransferase                                                 |
| maker-2-augustus-gene-226.50-mRNA-1 | Japonica | Indica   |        | Os04g0460400 | OsR498G0204173500.01.T01 | Casparian strip membrane protein 7                                  |
| maker-2-augustus-gene-226.52-mRNA-1 | Japonica | Indica   |        | Os02g0579000 | OsR498G0204175500.01.T05 | NAC transcription factor                                            |
| maker-2-augustus-gene-226.55-mRNA-1 | Japonica | NA       |        | Os02g0579300 | OsR498G0204176500.01.T01 | Transcription factor MYB74                                          |
| maker-2-augustus-gene-226.57-mRNA-1 | Japonica | NA       |        | Os02g0578400 | OsR498G0204173800.01.T01 | Photosynthetic NDH subunit of luminal location 2 chloroplastic      |
| maker-2-augustus-gene-227.0-mRNA-1  | Japonica | NA       |        | Os02g0579600 | OsR498G0204179700.01.T03 | MADS-box transcription factor                                       |
| maker-2-augustus-gene-227.11-mRNA-1 | Japonica | NA       |        | Os02g0580700 | OsR498G0204183100.01.T01 | Flavin-containing monooxygenase                                     |
| maker-2-augustus-gene-227.13-mRNA-1 | Japonica | NA       |        | Os02g0579800 | OsR498G0204180600.01.T01 | Cell number regulator 2                                             |
| maker-2-augustus-gene-227.16-mRNA-1 | Japonica | Indica   |        | Os02g0580000 | OsR498G0204181200.01.T01 | Plant cadmium resistance 2                                          |
| maker-2-augustus-gene-227.19-mRNA-1 | Japonica | NA       |        | Os02g0580100 | OsR498G0204181600.01.T04 | Plasma-membrane choline transporter family protein                  |
| maker-2-augustus-gene-227.24-mRNA-1 | Japonica | NA       |        | Os02g0580400 | OsR498G0204182200.01.T01 | Dynein light chain, cytoplasmic                                     |
| maker-2-augustus-gene-227.4-mRNA-1  | Japonica | NA       |        | Os02g0580300 | OsR498G0204181700.01.T06 | General regulatory factor2                                          |
| maker-2-augustus-gene-227.8-mRNA-1  | Japonica | Indica   |        | Os02g0580600 | OsR498G0204182700.01.T01 | Flavin-containing monooxygenase                                     |
| maker-2-augustus-gene-228.0-mRNA-1  | Japonica | Indica   |        | Os02g0581000 | OsR498G0204183900.01.T01 | GPI ethanolamine phosphate transferase 1                            |
| maker-2-augustus-gene-228.20-mRNA-1 | Japonica | NA       |        | Os02g0581800 | OsR498G0204186500.01.T01 |                                                                     |
| maker-2-augustus-gene-228.22-mRNA-1 | Japonica | NA       |        | Os02g0580900 | OsR498G0204183600.01.T01 | Nitrate transporter 1.3                                             |
| maker-2-augustus-gene-228.26-mRNA-1 | Japonica | NA       |        | Os02g0581300 | OsR498G0204185600.01.T01 | LAG1 longevity assurance homolog 3                                  |
| maker-2-augustus-gene-228.32-mRNA-1 | Japonica | Indica   |        | Os02g0582150 | OsR498G0204187200.01.T02 | 18S pre-ribosomal assembly protein gar2-related                     |
| maker-2-augustus-gene-228.35-mRNA-1 | Japonica | Indica   |        | Os05g0587400 | OsR498G0204187400.01.T01 |                                                                     |
| maker-2-augustus-gene-228.38-mRNA-1 | Japonica | NA       |        | Os02g0582400 | OsR498G0204187800.01.T01 |                                                                     |
| maker-2-augustus-gene-228.40-mRNA-1 | Japonica | NA       |        | Os02g0582600 | OsR498G0204188600.01.T01 |                                                                     |
| maker-2-augustus-gene-228.8-mRNA-1  | Japonica | NA       |        |              |                          | AB hydrolase-1 domain-containing protein                            |
| maker-2-augustus-gene-229.10-mRNA-1 | Japonica | NA       |        | Os02g0584200 |                          |                                                                     |
| maker-2-augustus-gene-229.12-mRNA-1 | Japonica | NA       |        | Os02g0584700 | OsR498G0204192200.01.T01 | HMA domain-containing protein (Fragment)                            |
| maker-2-augustus-gene-229.13-mRNA-1 | Japonica | NA       |        | Os02g0584800 | OsR498G0204192400.01.T02 | HMA domain-containing protein (Fragment)                            |
| maker-2-augustus-gene-229.14-mRNA-1 | Japonica | Japonica |        | Os02g0585100 | OsR498G0204193000.01.T01 | HMA domain-containing protein                                       |
| maker-2-augustus-gene-229.16-mRNA-1 | Japonica | NA       |        | Os02g0585700 |                          | glycine-rich RNA-binding protein 2-like                             |
| maker-2-augustus-gene-229.6-mRNA-1  | Japonica | Indica   |        | Os02g0582900 | OsR498G0204189400.01.T01 |                                                                     |
| maker-2-augustus-gene-229.8-mRNA-1  | Japonica | NA       |        | Os02g0583000 | OsR498G0204190000.01.T01 | Fanconi anemia group E protein                                      |
| maker-2-augustus-gene-230.0-mRNA-1  | Japonica | NA       |        |              |                          |                                                                     |
| maker-2-augustus-gene-232.2-mRNA-1  | Japonica | NA       |        | Os05g0269800 |                          | DDE Tnp4 domain-containing protein                                  |
| maker-2-augustus-gene-232.3-mRNA-1  | Japonica | Indica   |        | Os05g0269800 | OsR498G0202947900.01.T02 | Transposon protein, putative, CACTA, En/Spm sub-class               |
| maker-2-augustus-gene-230.54-mRNA-1 | Japonica | NA       |        | Os02g0586800 | OsR498G0204197700.01.T01 | Protein FLUORESCENT IN BLUE LIGHT chloroplastic                     |
| maker-2-augustus-gene-230.58-mRNA-1 | Japonica | NA       |        | Os02g0586900 | OsR498G0204198300.01.T01 | glycine-rich protein 3-like                                         |
| maker-2-augustus-gene-230.60-mRNA-1 | Japonica | NA       |        | Os02g0587000 | OsR498G0204198700.01.T01 | Glycine-rich cell wall structural protein-like                      |
| maker-2-augustus-gene-230.64-mRNA-1 | Japonica | NA       |        | Os02g0587600 | OsR498G0204199700.01.T01 | Xylan 14-beta-xylosidase                                            |
| maker-2-augustus-gene-230.66-mRNA-1 | Japonica | NA       |        | Os02g0587800 | OsR498G0204200500.01.T01 | TATA-binding protein-associated factor 2N                           |
| maker-2-augustus-gene-230.68-mRNA-1 | Japonica | NA       |        |              | OsR498G0204200900.01.T01 | Interleukin enhancer binding factor 3                               |
| maker-2-augustus-gene-230.70-mRNA-1 | Japonica | NA       |        |              | OsR498G0204201100.01.T01 | Low complexity                                                      |
| maker-2-augustus-gene-230.72-mRNA-1 | Japonica | NA       |        |              |                          | Glycine-rich cell wall structural protein                           |
| maker-2-augustus-gene-230.74-mRNA-1 | Japonica | NA       |        | Os02g0586500 | OsR498G0204196600.01.T01 | Small nuclear ribonucleoprotein Sm D1                               |
| maker-2-augustus-gene-230.76-mRNA-1 | Japonica | NA       |        | Os02g0588300 | OsR498G0204202000.01.T03 | Fimbrin 1                                                           |
| maker-2-augustus-gene-231.33-mRNA-1 | Japonica | NA       |        | Os02g0588500 | OsR498G0204203300.01.T01 | Glycerophosphodiester phosphodiesterase                             |
| maker-2-augustus-gene-231.39-mRNA-1 | Japonica | NA       |        | Os02g0588600 | OsR498G0204203500.01.T01 | PTB domain-containing engulfment adapter protein 1 isoform 1        |
| maker-2-augustus-gene-231.42-mRNA-1 | Japonica | NA       |        | Os02g0589700 | OsR498G0204209400.01.T01 | Lecithin-cholesterol acyltransferase-like 1                         |
| maker-2-augustus-gene-232.0-mRNA-1  | Japonica | NA       |        |              | OsR498G0204210500.01.T06 |                                                                     |
| maker-2-augustus-gene-232.1-mRNA-1  | Japonica | Indica   |        | Os02g0591500 | OsR498G0204215900.01.T02 | 60S ribosomal protein L7-3                                          |
| maker-2-augustus-gene-232.7-mRNA-1  | Japonica | NA       | Kinase |              | OsR498G0204210800.01.T01 | Serine/threonine-protein kinase Nek6                                |
| maker-2-augustus-gene-233.15-mRNA-1 | Japonica | NA       |        |              |                          | Putative WD40/YVTN repeat-like-containing domain-containing protein |
| maker-2-augustus-gene-233.22-mRNA-1 | Japonica | NA       |        | Os02g0591700 | OsR498G0204216600.01.T01 | 60S ribosomal protein L6                                            |
| maker-2-augustus-gene-233.24-mRNA-1 | Japonica | NA       |        | Os02g0591800 | OsR498G0204216800.01.T01 | Brix domain-containing protein 2                                    |
| maker-2-augustus-gene-234.12-mRNA-1 | Japonica | Indica   |        | Os04g0477000 | OsR498G0204228500.01.T02 | NPH3 domain-containing protein (Fragment)                           |
| maker-2-augustus-gene-234.20-mRNA-1 | Japonica | NA       |        | Os02g0594800 | OsR498G0204230000.01.T01 | NAC domain-containing protein 8                                     |
| maker-2-augustus-gene-234.22-mRNA-1 | Japonica | NA       |        | Os02g0594900 | OsR498G0204230400.01.T01 | N-acetylglucosaminyltransferase III                                 |
| maker-2-augustus-gene-235.39-mRNA-1 | Japonica | NA       |        | Os02g0595800 | OsR498G0204235100.01.T02 | Eukaryotic translation initiation factor 4B                         |
| maker-2-augustus-gene-235.41-mRNA-1 | Japonica | NA       |        |              | OsR498G0204238100.01.T01 | BTB/POZ and TAZ domain-containing protein 2                         |

|                                      |          |          |           |              |                          |                                                                           |
|--------------------------------------|----------|----------|-----------|--------------|--------------------------|---------------------------------------------------------------------------|
| maker-2-augustus-gene-235.43-mRNA-1  | Japonica | NA       |           | Os02g0596900 | OsR498G0204238700.01.T01 | Actin-related protein 3 isoform A                                         |
| maker-2-augustus-gene-235.48-mRNA-1  | Japonica | NA       |           | Os02g0595100 | OsR498G0204231800.01.T01 | N-acetylglucosaminyltransferase III                                       |
| maker-2-augustus-gene-235.50-mRNA-1  | Japonica | Japonica |           | Os02g0595300 | OsR498G0204233200.01.T05 |                                                                           |
| maker-2-augustus-gene-235.55-mRNA-1  | Japonica | NA       |           | Os02g0595500 | OsR498G0204234400.01.T01 | Isocitrate dehydrogenase                                                  |
| maker-2-augustus-gene-235.57-mRNA-1  | Japonica | NA       |           | Os02g0595900 | OsR498G0204235400.01.T01 | High-affinity nitrate transporter                                         |
| maker-2-augustus-gene-235.59-mRNA-1  | Japonica | NA       |           | Os02g0596000 | OsR498G0204236200.01.T02 | Rhodanese-like domain-containing protein 11 chloroplastic                 |
| maker-2-augustus-gene-235.64-mRNA-1  | Japonica | NA       |           | Os02g0596100 | OsR498G0204236600.01.T01 | Nucleoporin GLE1                                                          |
| maker-2-augustus-gene-235.69-mRNA-1  | Japonica | NA       |           | Os02g0596500 | OsR498G0204237600.01.T01 | Vacuolar protein sorting-associated protein 20 isogeny 2                  |
| maker-2-augustus-gene-236.11-mRNA-1  | Japonica | Indica   |           | Os02g0599100 | OsR498G0204243700.01.T01 | Embryo defective 2423                                                     |
| maker-2-augustus-gene-236.15-mRNA-1  | Japonica | NA       |           | Os02g0597000 | OsR498G0204239200.01.T01 | Ultraviolet-B receptor UVR8                                               |
| maker-2-augustus-gene-236.8-mRNA-1   | Japonica | NA       |           |              | OsR498G0204243500.01.T01 | Intracellular protein transport protein USO1                              |
| maker-2-augustus-gene-237.135-mRNA-1 | Japonica | NA       |           | Os02g0601700 | OsR498G0204252100.01.T04 | E3 ubiquitin-protein ligase mind-bomb-like                                |
| maker-2-augustus-gene-237.145-mRNA-1 | Japonica | NA       |           | Os02g0601400 | OsR498G0204251600.01.T01 | Premnaspirodiene oxygenase                                                |
| maker-2-augustus-gene-237.147-mRNA-1 | Japonica | Indica   |           | Os02g0601500 | OsR498G0204251600.01.T01 | Premnaspirodiene oxygenase                                                |
| maker-2-augustus-gene-237.46-mRNA-1  | Japonica | Indica   |           | Os02g0598400 | OsR498G0204244900.01.T01 | Telomere length regulation protein TEL                                    |
| maker-2-augustus-gene-237.49-mRNA-1  | Japonica | NA       |           |              |                          | Protein-serine/threonine phosphatase                                      |
| maker-2-augustus-gene-237.51-mRNA-1  | Japonica | Indica   |           | Os02g0598500 | OsR498G0204246300.01.T03 | PPM-type phosphatase domain-containing protein                            |
| maker-2-augustus-gene-238.40-mRNA-1  | Japonica | NA       | Kinase    | Os02g0602100 | OsR498G0204253300.01.T07 | Cyclin-dependent kinase G-1                                               |
| maker-2-augustus-gene-238.47-mRNA-1  | Japonica | Japonica |           | Os02g0602600 | OsR498G0204253900.01.T01 | RRM domain-containing protein                                             |
| maker-2-augustus-gene-238.52-mRNA-1  | Japonica | NA       |           |              | OsR498G0204258300.01.T05 | Transcription factor bHLH128                                              |
| maker-2-augustus-gene-238.56-mRNA-1  | Japonica | Indica   |           | Os02g0601800 | OsR498G0204252400.01.T05 | Transcription factor GTE9                                                 |
| maker-2-augustus-gene-238.61-mRNA-1  | Japonica | Indica   |           | Os04g0488400 | OsR498G0204254200.01.T01 | Protein TWIN SISTER of FT (Fragment)                                      |
| maker-2-augustus-gene-238.65-mRNA-1  | Japonica | NA       |           | Os02g0603800 | OsR498G0204258800.01.T02 | Hydroxymethylbutenyl 4-diphosphate synthase                               |
| maker-2-augustus-gene-239.0-mRNA-1   | Japonica | NA       |           | Os02g0604300 | OsR498G0204261100.01.T01 | UDP-galactose transporter                                                 |
| maker-2-augustus-gene-239.13-mRNA-1  | Japonica | NA       |           | Os02g0605600 | OsR498G0204265700.01.T01 | RNA-binding protein Luc7-like 2                                           |
| maker-2-augustus-gene-239.19-mRNA-1  | Japonica | NA       |           | Os02g0606000 | OsR498G0204267500.01.T03 | Chitinase                                                                 |
| maker-2-augustus-gene-239.22-mRNA-1  | Japonica | NA       |           | Os02g0605500 | OsR498G0204265600.01.T03 | TRAF-type domain-containing protein (Fragment)                            |
| maker-2-augustus-gene-239.24-mRNA-1  | Japonica | NA       |           | Os02g0605900 | OsR498G0204267400.01.T01 | Class IV chitinase                                                        |
| maker-2-augustus-gene-239.26-mRNA-1  | Japonica | NA       |           |              | OsR498G0204267800.01.T01 | Eukaryotic translation initiation factor 2A                               |
| maker-2-augustus-gene-239.32-mRNA-1  | Japonica | NA       |           |              | OsR498G0204269600.01.T03 | tRNA (guanine(37)-N1)-methyltransferase                                   |
| maker-2-augustus-gene-240.0-mRNA-1   | Japonica | NA       |           | Os02g0606700 | OsR498G0204270100.01.T03 | Isochorismatase domain-containing protein                                 |
| maker-2-augustus-gene-240.10-mRNA-1  | Japonica | NA       |           | Os02g0608300 |                          | SWIM-type domain-containing protein                                       |
| maker-2-augustus-gene-240.17-mRNA-1  | Japonica | Indica   |           | Os02g0606900 | OsR498G0204272000.01.T01 | PPM-type phosphatase domain-containing protein                            |
| maker-2-augustus-gene-240.20-mRNA-1  | Japonica | NA       |           |              |                          | Protein-serine/threonine phosphatase                                      |
| maker-2-augustus-gene-240.23-mRNA-1  | Japonica | NA       |           | Os02g0607700 | OsR498G0204272400.01.T01 | (+)-neomenthol dehydrogenase                                              |
| maker-2-augustus-gene-240.3-mRNA-1   | Japonica | NA       |           | Os02g0606800 | OsR498G0204270300.01.T01 | Isochorismatase hydrolase                                                 |
| maker-2-augustus-gene-240.8-mRNA-1   | Japonica | NA       |           | Os02g0608100 |                          |                                                                           |
| maker-2-augustus-gene-241.12-mRNA-1  | Japonica | NA       |           | Os02g0608400 | OsR498G0204275400.01.T02 | Leucine zipper-EF-hand-containing transmembrane protein 1                 |
| maker-2-augustus-gene-241.17-mRNA-1  | Japonica | NA       | Kinase-TM | Os02g0608500 | OsR498G0204275600.01.T03 | Dual specificity protein kinase shkC                                      |
| maker-2-augustus-gene-241.22-mRNA-1  | Japonica | NA       |           | Os02g0608900 | OsR498G0204276800.01.T01 | Outer envelope pore protein like                                          |
| maker-2-augustus-gene-241.28-mRNA-1  | Japonica | Indica   |           | Os02g0212600 | OsR498G0204279800.01.T04 |                                                                           |
| maker-2-augustus-gene-241.5-mRNA-1   | Japonica | NA       |           | Os02g0609200 | OsR498G0204277100.01.T01 | Monopolar spindle                                                         |
| maker-2-augustus-gene-241.7-mRNA-1   | Japonica | NA       |           | Os02g0609400 | OsR498G0204277700.01.T01 |                                                                           |
| maker-2-augustus-gene-242.27-mRNA-1  | Japonica | NA       |           | Os02g0610500 | OsR498G0204282700.01.T01 | COLD                                                                      |
| maker-2-augustus-gene-242.29-mRNA-1  | Japonica | NA       |           | Os02g0610800 | OsR498G0204283700.01.T01 | Protein TAB2 homolog, chloroplastic                                       |
| maker-2-augustus-gene-242.31-mRNA-1  | Japonica | NA       |           | Os02g0611200 | OsR498G0204285300.01.T01 | S-adenosylmethionine decarboxylase proenzyme                              |
| maker-2-augustus-gene-242.32-mRNA-1  | Japonica | NA       |           | Os02g0611400 | OsR498G0204285700.01.T01 | Protein NUCLEAR FUSION DEFECTIVE 5 mitochondrial                          |
| maker-2-augustus-gene-242.34-mRNA-1  | Japonica | NA       |           | Os02g0610400 | OsR498G0204282000.01.T02 | La protein 1                                                              |
| maker-2-augustus-gene-242.38-mRNA-1  | Japonica | NA       |           | Os02g0610600 | OsR498G0204283200.01.T03 | Splicing factor, arginine/serine-rich 7                                   |
| maker-2-augustus-gene-242.42-mRNA-1  | Japonica | NA       |           | Os02g0610700 | OsR498G0204283600.01.T01 | Early light-induced, chloroplastic                                        |
| maker-2-augustus-gene-242.45-mRNA-1  | Japonica | Indica   |           | Os02g0611000 | OsR498G0204285000.01.T01 | Secologanin synthase                                                      |
| maker-2-augustus-gene-242.47-mRNA-1  | Japonica | NA       |           |              | OsR498G0204285600.01.T01 | Histone-lysine N-methyltransferase ASHR3                                  |
| maker-2-augustus-gene-243.0-mRNA-1   | Japonica | NA       |           | Os02g0611800 | OsR498G0204287700.01.T01 | Hydroxycinnamoyl-Coenzyme A shikimate/quinate hydroxycinnamoyltransferase |
| maker-2-augustus-gene-243.13-mRNA-1  | Japonica | NA       |           | Os02g0611500 | OsR498G0204286200.01.T01 | MI domain-containing protein                                              |
| maker-2-augustus-gene-243.17-mRNA-1  | Japonica | NA       |           | Os02g0612300 | OsR498G0204289000.01.T01 | Nuclear cap-binding protein subunit 2                                     |
| maker-2-augustus-gene-243.25-mRNA-1  | Japonica | NA       |           | Os02g0612800 | OsR498G0204292000.01.T03 | sister chromatid cohesion protein PDS5 homolog B-B-like                   |
| maker-2-augustus-gene-243.30-mRNA-1  | Japonica | Indica   |           | Os04g0109900 | OsR498G0204293200.01.T01 | Exostosin domain-containing protein (Fragment)                            |
| maker-2-augustus-gene-243.5-mRNA-1   | Japonica | NA       |           | Os02g0612100 | OsR498G0204288500.01.T01 | Phosphatidyl-N-methylethanolamine N-methyltransferase                     |
| maker-2-augustus-gene-243.7-mRNA-1   | Japonica | Indica   |           | Os02g0613000 | OsR498G0204292900.01.T01 | Calcium uptake protein, mitochondrial                                     |
| maker-2-augustus-gene-244.26-mRNA-1  | Japonica | NA       |           | Os02g0613600 | OsR498G0204293900.01.T04 | Trafficking protein particle complex subunit 2                            |
| maker-2-augustus-gene-244.45-mRNA-1  | Japonica | NA       | LRR-TM    | Os02g0613200 | OsR498G0204293400.01.T01 | Regulatory subunit                                                        |

|                                     |          |          |               |              |                          |                                                                         |
|-------------------------------------|----------|----------|---------------|--------------|--------------------------|-------------------------------------------------------------------------|
| maker-2-augustus-gene-244.50-mRNA-1 | Japonica | NA       |               |              | OsR498G0204293600.01.T01 | Fanconi anaemia protein FANCD                                           |
| maker-2-augustus-gene-252.34-mRNA-1 | Japonica | NA       |               |              | OsR498G0204322800.01.T01 | Phosphatidylinositol N-acetylglucosaminyltransferase subunit P-related  |
| maker-2-augustus-gene-253.14-mRNA-1 | Japonica | NA       |               | Os02g0618200 | OsR498G0204327700.01.T01 | Two-component response regulator-like PRR1                              |
| maker-2-augustus-gene-254.0-mRNA-1  | Japonica | NA       |               | Os02g0620100 | OsR498G0204332500.01.T01 | Kinetochore protein-like                                                |
| maker-2-augustus-gene-254.12-mRNA-1 | Japonica | NA       |               | Os02g0621300 | OsR498G0204336600.01.T01 | Aldehyde oxygenase (deformylating)                                      |
| maker-2-augustus-gene-254.3-mRNA-1  | Japonica | NA       |               | Os02g0620400 | OsR498G0204333300.01.T01 | Enzyme of the cupin superfamily                                         |
| maker-2-augustus-gene-254.5-mRNA-1  | Japonica | NA       |               |              |                          | Putative SET-domain containing protein family                           |
| maker-2-augustus-gene-254.9-mRNA-1  | Japonica | NA       |               | Os02g0619600 | OsR498G0204331600.01.T01 | Putative RING zinc finger and VWF domain family protein                 |
| maker-2-augustus-gene-255.33-mRNA-1 | Japonica | NA       |               | Os02g0621700 | OsR498G0204337500.01.T01 | Succinate--CoA ligase [ADP-forming] subunit beta, mitochondrial         |
| maker-2-augustus-gene-255.40-mRNA-1 | Japonica | NA       |               | Os02g0622100 | OsR498G0204338900.01.T01 | Serine/threonine protein kinase                                         |
| maker-2-augustus-gene-255.46-mRNA-1 | Japonica | NA       |               |              | OsR498G0204339500.01.T05 | GLTP domain-containing protein (Fragment)                               |
| maker-2-augustus-gene-255.62-mRNA-1 | Japonica | NA       |               | Os02g0621500 | OsR498G0204337000.01.T01 | E3 ubiquitin-protein ligase PRT1                                        |
| maker-2-augustus-gene-255.64-mRNA-1 | Japonica | NA       |               | Os02g0621800 | OsR498G0204338000.01.T01 | Long-chain-alcohol oxidase                                              |
| maker-2-augustus-gene-255.69-mRNA-1 | Japonica | Indica   |               | Os08g0567200 | OsR498G0204340000.01.T02 | RNA-binding protein 42                                                  |
| maker-2-augustus-gene-256.0-mRNA-1  | Japonica | NA       |               | Os02g0624400 | OsR498G0204347900.01.T02 | Hexosyltransferase                                                      |
| maker-2-augustus-gene-256.11-mRNA-1 | Japonica | NA       |               | Os02g0623500 | OsR498G0204343600.01.T04 | Lysine--tRNA ligase chloroplastic/mitochondrial                         |
| maker-2-augustus-gene-256.18-mRNA-1 | Japonica | Indica   | Kinase-TM     | Os02g0623600 | OsR498G0204344200.01.T02 | Wall-associated receptor kinase-like 8                                  |
| maker-2-augustus-gene-256.20-mRNA-1 | Japonica | NA       | Kinase-TM     |              | OsR498G0204345600.01.T01 | Putative wall-associated receptor kinase-like 16                        |
| maker-2-augustus-gene-256.22-mRNA-1 | Japonica | NA       |               | Os02g0624300 | OsR498G0204346000.01.T01 | Transcription factor MYB4                                               |
| maker-2-augustus-gene-256.6-mRNA-1  | Japonica | NA       |               |              | OsR498G0204349900.01.T04 | Photolyase/cryptochrome alpha/beta domain-containing protein (Fragment) |
| maker-2-augustus-gene-257.43-mRNA-1 | Japonica | NA       |               |              | OsR498G0204352100.01.T02 |                                                                         |
| maker-2-augustus-gene-257.46-mRNA-1 | Japonica | NA       |               | Os02g0625500 | OsR498G0204351800.01.T03 | Adenosine kinase                                                        |
| maker-2-augustus-gene-257.50-mRNA-1 | Japonica | NA       |               | Os02g0626100 | OsR498G0204353600.01.T01 | Phenylalanine ammonia-lyase                                             |
| maker-2-augustus-gene-257.51-mRNA-1 | Japonica | NA       |               | Os02g0626400 | OsR498G0204354400.01.T02 | Phenylalanine ammonia-lyase                                             |
| maker-2-augustus-gene-257.60-mRNA-1 | Japonica | NA       |               | Os02g0627100 | OsR498G0204355400.01.T01 | Phenylalanine ammonia-lyase                                             |
| maker-2-augustus-gene-258.0-mRNA-1  | Japonica | NA       |               | Os02g0627700 | OsR498G0204357100.01.T01 | Cyclic nucleotide-binding domain                                        |
| maker-2-augustus-gene-258.2-mRNA-1  | Japonica | Indica   |               | Os04g0518800 | OsR498G0204358700.01.T03 | Cytokinin riboside 5'-monophosphate phosphoribohydrolase                |
| maker-2-augustus-gene-258.5-mRNA-1  | Japonica | NA       |               | Os01g0281200 | OsR498G0100675400.01.T01 | CYCLIN domain-containing protein (Fragment)                             |
| maker-2-augustus-gene-258.9-mRNA-1  | Japonica | NA       |               |              |                          |                                                                         |
| maker-2-augustus-gene-259.45-mRNA-1 | Japonica | Indica   |               | Os02g0628600 | OsR498G0204360900.01.T01 | Auxin response factor                                                   |
| maker-2-augustus-gene-259.47-mRNA-1 | Japonica | NA       |               |              | OsR498G0204362700.01.T01 |                                                                         |
| maker-2-augustus-gene-259.50-mRNA-1 | Japonica | NA       |               | Os02g0629200 | OsR498G0204364100.01.T01 | PIP aquaporin                                                           |
| maker-2-augustus-gene-260.12-mRNA-1 | Japonica | NA       |               |              | OsR498G0204370600.01.T01 | Regulator of nonsense transcripts 2                                     |
| maker-2-augustus-gene-260.6-mRNA-1  | Japonica | Japonica | Kinase-TM     | Os02g0632100 | OsR498G0509684800.01.T02 | Wall-associated receptor kinase 3                                       |
| maker-2-augustus-gene-260.9-mRNA-1  | Japonica | NA       |               | Os02g0631200 | OsR498G0204370400.01.T05 | Putative homeodomain-like transcription factor superfamily protein      |
| maker-2-augustus-gene-261.32-mRNA-1 | Japonica | NA       |               | Os02g0632500 | OsR498G0204376100.01.T06 | ADP-ribosylation factor GTPase-activating protein AGD4-like             |
| maker-2-augustus-gene-262.11-mRNA-1 | Japonica | NA       |               | Os02g0634900 | OsR498G0204383100.01.T02 | Proteasome endopeptidase complex                                        |
| maker-2-augustus-gene-262.15-mRNA-1 | Japonica | NA       |               | Os02g0635000 | OsR498G0204383500.01.T02 | Bifunctional nitrilase/nitrile hydratase NIT4                           |
| maker-2-augustus-gene-262.18-mRNA-1 | Japonica | NA       |               | Os02g0635200 | OsR498G0204383700.01.T01 | Beta-cyano-L-alanine hydratase/nitrilase                                |
| maker-2-augustus-gene-262.24-mRNA-1 | Japonica | Indica   |               | Os02g0635333 | OsR498G0204383900.01.T01 |                                                                         |
| maker-2-augustus-gene-262.27-mRNA-1 | Japonica | Indica   | Kinase-TM     | Os02g0633066 | OsR498G0204379000.01.T01 | Wall-associated receptor kinase 2-like                                  |
| maker-2-augustus-gene-262.38-mRNA-1 | Japonica | NA       |               |              |                          | B-block binding subunit of TFIIC                                        |
| maker-2-augustus-gene-262.4-mRNA-1  | Japonica | NA       |               | Os02g0634600 | OsR498G0204382300.01.T03 | SET domain-containing protein 9                                         |
| maker-2-augustus-gene-262.48-mRNA-1 | Japonica | NA       |               |              | OsR498G0204381800.01.T01 | Glycosyltransferase                                                     |
| maker-2-augustus-gene-262.7-mRNA-1  | Japonica | NA       |               | Os02g0634700 | OsR498G0204382700.01.T05 | Carboxypeptidase                                                        |
| maker-2-augustus-gene-263.37-mRNA-1 | Japonica | Indica   | Kinase-LRR-TM | Os11g0569800 | OsR498G0204384300.01.T02 | Putative LRR receptor-like serine/threonine-protein kinase              |
| maker-2-augustus-gene-263.38-mRNA-1 | Japonica | NA       |               | Os02g0635700 | OsR498G0204384500.01.T01 | C-terminal                                                              |
| maker-2-augustus-gene-263.40-mRNA-1 | Japonica | NA       |               |              | OsR498G0204386200.01.T01 | F-box/LRR-repeat protein 2-like                                         |
| maker-2-augustus-gene-263.42-mRNA-1 | Japonica | NA       |               | Os02g0636600 | OsR498G0204387000.01.T01 | ABA-responsive protein-like                                             |
| maker-2-augustus-gene-263.44-mRNA-1 | Japonica | NA       |               | Os02g0636700 | OsR498G0204387200.01.T01 | ABA-responsive protein-like                                             |
| maker-2-augustus-gene-263.47-mRNA-1 | Japonica | NA       |               | Os02g0637700 | OsR498G0204391000.01.T01 | S-nitrosogluthione reductase                                            |
| maker-2-augustus-gene-263.52-mRNA-1 | Japonica | NA       |               | Os02g0637800 | OsR498G0204391200.01.T01 | DUF639 domain-containing protein                                        |
| maker-2-augustus-gene-264.35-mRNA-1 | Japonica | NA       |               | Os02g0637900 | OsR498G0204391300.01.T05 | Ankyrin repeat domain-containing protein 50 isoform 1                   |
| maker-2-augustus-gene-264.40-mRNA-1 | Japonica | Indica   |               | Os02g0638900 | OsR498G0204394700.01.T03 | WD repeat-containing protein 44                                         |
| maker-2-augustus-gene-264.46-mRNA-1 | Japonica | NA       |               | Os02g0639000 | OsR498G0204395100.01.T01 | Protein-serine/threonine phosphatase                                    |
| maker-2-augustus-gene-264.52-mRNA-1 | Japonica | Indica   |               | Os02g0639300 | OsR498G0204395900.01.T02 | CBS domain-containing protein CBSX5                                     |
| maker-2-augustus-gene-264.54-mRNA-1 | Japonica | Indica   |               | Os04g0530100 | OsR498G0204396500.01.T01 | Beta-expansin 3                                                         |
| maker-2-augustus-gene-264.57-mRNA-1 | Japonica | NA       |               | Os02g0639600 | OsR498G0204396700.01.T01 | Sphingolipid 4-desaturase                                               |
| maker-2-augustus-gene-264.60-mRNA-1 | Japonica | Indica   |               | Os02g0639700 | OsR498G0204396900.01.T02 | Putative nuclear RNA export factor SDE5                                 |
| maker-2-augustus-gene-264.65-mRNA-1 | Japonica | NA       |               | Os02g0638000 | OsR498G0204391600.01.T01 | Hydroxyproline-rich glycoprotein family protein                         |
| maker-2-augustus-gene-264.69-mRNA-1 | Japonica | NA       |               |              | OsR498G0204392000.01.T01 | Serine/arginine repetitive matrix protein 1-like protein                |

|                                     |          |          |           |              |                          |                                                                            |
|-------------------------------------|----------|----------|-----------|--------------|--------------------------|----------------------------------------------------------------------------|
| maker-2-augustus-gene-264.71-mRNA-1 | Japonica | NA       |           | Os02g0638400 | OsR498G0204392600.01.T01 | Vacuolar protein-sorting protein bro1                                      |
| maker-2-augustus-gene-264.73-mRNA-1 | Japonica | Japonica | Kinase-TM | Os02g0639100 | OsR498G0204395600.01.T01 | cold-responsive protein kinase 1                                           |
| maker-2-augustus-gene-265.0-mRNA-1  | Japonica | NA       |           |              |                          | Elicitor-responsive protein 3                                              |
| maker-2-augustus-gene-265.10-mRNA-1 | Japonica | Indica   |           | Os02g0641300 | OsR498G0204402500.01.T01 | MYB transcription factor                                                   |
| maker-2-augustus-gene-265.14-mRNA-1 | Japonica | Indica   |           | Os02g0641800 | OsR498G0204402700.01.T02 | DEAD-box ATP-dependent RNA helicase 8                                      |
| maker-2-augustus-gene-265.22-mRNA-1 | Japonica | Indica   |           | Os02g0640300 | OsR498G0204398800.01.T02 | Membrane steroid-binding protein 1                                         |
| maker-2-augustus-gene-265.26-mRNA-1 | Japonica | NA       |           | Os02g0641000 | OsR498G0204401000.01.T01 | LIM transcription factor                                                   |
| maker-2-augustus-gene-265.3-mRNA-1  | Japonica | NA       |           | Os02g0640200 | OsR498G0204398300.01.T01 | tRNA (Guanine(26)-N(2))-dimethyltransferase                                |
| maker-2-augustus-gene-265.6-mRNA-1  | Japonica | NA       |           |              | OsR498G0204400500.01.T01 | (+)-neomenthol dehydrogenase-like isoform X1                               |
| maker-2-augustus-gene-266.30-mRNA-1 | Japonica | Japonica |           | Os02g0641900 | OsR498G0204403500.01.T01 | Transcription factor MYB74                                                 |
| maker-2-augustus-gene-266.32-mRNA-1 | Japonica | Indica   |           | Os02g0642700 | OsR498G0204405900.01.T02 | CAP10 domain-containing protein                                            |
| maker-2-augustus-gene-266.37-mRNA-1 | Japonica | NA       |           | Os02g0643500 | OsR498G0204409300.01.T01 | Thylakoid lumenal protein like                                             |
| maker-2-augustus-gene-266.43-mRNA-1 | Japonica | NA       |           | Os02g0642200 | OsR498G0204404000.01.T01 | Remorin                                                                    |
| maker-2-augustus-gene-266.46-mRNA-1 | Japonica | Indica   |           | Os04g0533500 | OsR498G0204404400.01.T01 | Ascorbate-specific transmembrane electron transporter 2                    |
| maker-2-augustus-gene-266.49-mRNA-1 | Japonica | NA       |           | Os02g0642600 | OsR498G0204405600.01.T01 | Shortage in chiasmata 1                                                    |
| maker-2-augustus-gene-266.56-mRNA-1 | Japonica | NA       |           | Os02g0643200 | OsR498G0204408000.01.T01 | Axial regulator YABBY 1                                                    |
| maker-2-augustus-gene-266.59-mRNA-1 | Japonica | NA       |           |              | OsR498G0204409600.01.T01 | Secondary wall NAC master switch                                           |
| maker-2-augustus-gene-267.0-mRNA-1  | Japonica | Indica   |           | Os04g0537800 | OsR498G0204410700.01.T01 | Cysteine-rich repeat secretory protein 15                                  |
| maker-2-augustus-gene-267.14-mRNA-1 | Japonica | NA       |           | Os02g0644500 | OsR498G0204412600.01.T01 | ATG13 domain-containing protein (Fragment)                                 |
| maker-2-augustus-gene-267.17-mRNA-1 | Japonica | NA       |           | Os02g0645100 | OsR498G0204416000.01.T02 | Kinesin-related protein1                                                   |
| maker-2-augustus-gene-267.19-mRNA-1 | Japonica | NA       |           | Os11g0660000 | OsR498G0204415200.01.T01 | Magnesiumproton exchanger                                                  |
| maker-2-augustus-gene-267.2-mRNA-1  | Japonica | NA       |           | Os02g0644100 | OsR498G0204411300.01.T02 | Hsp organizing protein/stress-inducible protein                            |
| maker-2-augustus-gene-267.27-mRNA-1 | Japonica | NA       |           | Os02g0645100 | OsR498G0204416000.01.T02 | Kinesin-like protein KIN-7C                                                |
| maker-2-augustus-gene-267.7-mRNA-1  | Japonica | Indica   |           | Os04g0537900 | OsR498G0204411200.01.T01 | Vacuolar-processing enzyme                                                 |
| maker-2-augustus-gene-268.0-mRNA-1  | Japonica | NA       |           | Os02g0645600 | OsR498G0204416700.01.T01 | GATA transcription factor                                                  |
| maker-2-augustus-gene-268.13-mRNA-1 | Japonica | NA       |           | Os02g0646500 | OsR498G0204418800.01.T01 | Aldehyde dehydrogenase                                                     |
| maker-2-augustus-gene-268.14-mRNA-1 | Japonica | Indica   |           | Os02g0646500 | OsR498G0204418800.01.T03 | Aldehyde dehydrogenase                                                     |
| maker-2-augustus-gene-268.2-mRNA-1  | Japonica | NA       |           | Os02g0646200 | OsR498G0204418300.01.T01 | B-box zinc finger protein 21                                               |
| maker-2-augustus-gene-268.4-mRNA-1  | Japonica | NA       |           | Os02g0646400 | OsR498G0204418500.01.T01 | Monothiol glutaredoxin-S6                                                  |
| maker-2-augustus-gene-268.8-mRNA-1  | Japonica | NA       |           | Os02g0647900 | OsR498G0204420900.01.T02 | Aldehyde dehydrogenase                                                     |
| maker-2-augustus-gene-269.31-mRNA-1 | Japonica | NA       |           | Os02g0649700 | OsR498G0204423500.01.T01 | ATP-dependent zinc metalloprotease FTSH 7 chloroplastic                    |
| maker-2-augustus-gene-269.36-mRNA-1 | Japonica | NA       | Kinase-TM | Os02g0648100 | OsR498G0204421800.01.T01 | Putative LRR receptor-like serine/threonine-protein kinase                 |
| maker-2-augustus-gene-269.38-mRNA-1 | Japonica | NA       |           |              | OsR498G0204422600.01.T01 | Putative homeodomain-like transcription factor superfamily protein isoform |
| maker-2-augustus-gene-269.41-mRNA-1 | Japonica | NA       |           |              |                          | RING-type domain-containing protein                                        |
| maker-2-augustus-gene-269.43-mRNA-1 | Japonica | NA       |           | Os02g0649400 | OsR498G0204425200.01.T02 | Embryogenesis-associated protein EMB8                                      |
| maker-2-augustus-gene-269.48-mRNA-1 | Japonica | NA       |           | Os02g0649800 | OsR498G0204425600.01.T01 | Cytochrome b5 heme-binding domain-containing protein                       |
| maker-2-augustus-gene-269.50-mRNA-1 | Japonica | NA       |           | Os02g0649900 | OsR498G0204426800.01.T01 | Iron-phytosiderophore transporter yellow stripe 1                          |
| maker-2-augustus-gene-27.20-mRNA-1  | Japonica | NA       |           | Os02g0148000 | OsR498G0202971900.01.T01 | CCT domain-containing protein (Fragment)                                   |
| maker-2-augustus-gene-27.22-mRNA-1  | Japonica | NA       |           |              | OsR498G0202973100.01.T01 | COP1-interactive protein 1-like isoform X2                                 |
| maker-2-augustus-gene-27.27-mRNA-1  | Japonica | NA       |           | Os02g0148400 | OsR498G0202973500.01.T01 | FMN-binding split barrel                                                   |
| maker-2-augustus-gene-27.30-mRNA-1  | Japonica | Indica   |           | Os02g0148500 | OsR498G0202973700.01.T03 | GATA transcription factor 17                                               |
| maker-2-augustus-gene-27.41-mRNA-1  | Japonica | NA       |           |              |                          |                                                                            |
| maker-2-augustus-gene-27.43-mRNA-1  | Japonica | NA       | Kinase-TM | Os02g0148100 | OsR498G0202972400.01.T02 | Mitogen-activated protein kinase                                           |
| maker-2-augustus-gene-270.0-mRNA-1  | Japonica | NA       |           |              | OsR498G0204429900.01.T01 | Mutant required to maintain repression 1                                   |
| maker-2-augustus-gene-270.11-mRNA-1 | Japonica | NA       | Kinase-TM | Os02g0650500 | OsR498G0204428800.01.T03 | probable serine/threonine-protein kinase PBL19                             |
| maker-2-augustus-gene-270.14-mRNA-1 | Japonica | NA       |           |              | OsR498G0204430800.01.T02 | U6 snRNA phosphodiesterase                                                 |
| maker-2-augustus-gene-270.18-mRNA-1 | Japonica | NA       |           | Os02g0651300 | OsR498G0204431000.01.T03 | Protein ORANGE-GREEN, chloroplastic                                        |
| maker-2-augustus-gene-270.2-mRNA-1  | Japonica | NA       |           | Os02g0650900 | OsR498G0204430300.01.T01 | Glutamate dehydrogenase                                                    |
| maker-2-augustus-gene-270.22-mRNA-1 | Japonica | NA       |           | Os02g0652000 | OsR498G0204432800.01.T01 | Cyclin                                                                     |
| maker-2-augustus-gene-270.25-mRNA-1 | Japonica | NA       |           |              | OsR498G0204433400.01.T01 | WRKY transcription factor                                                  |
| maker-2-augustus-gene-270.4-mRNA-1  | Japonica | Indica   |           | Os04g0542800 | OsR498G0204428200.01.T01 | Iron-phytosiderophore transporter yellow stripe 1                          |
| maker-2-augustus-gene-271.0-mRNA-1  | Japonica | NA       |           | Os02g0652800 | OsR498G0204435700.01.T01 | Glycerol-3-phosphate transporter                                           |
| maker-2-augustus-gene-271.12-mRNA-1 | Japonica | NA       |           | Os02g0652300 | OsR498G0204434600.01.T01 | ELMO domain-containing protein A                                           |
| maker-2-augustus-gene-271.15-mRNA-1 | Japonica | Indica   |           | Os10g0549100 | OsR498G0204435000.01.T01 | Vesicle-associated protein 2-1                                             |
| maker-2-augustus-gene-271.21-mRNA-1 | Japonica | NA       |           | Os02g0652600 | OsR498G0204435600.01.T01 | Mitochondrial/chloroplast ribosomal protein L19                            |
| maker-2-augustus-gene-271.26-mRNA-1 | Japonica | NA       |           | Os02g0653200 | OsR498G0204438000.01.T01 | Phytoecyanin domain-containing protein                                     |
| maker-2-augustus-gene-271.28-mRNA-1 | Japonica | NA       |           | Os02g0653400 | OsR498G0204438200.01.T01 | Agmatine coumaroyltransferase-2                                            |
| maker-2-augustus-gene-271.3-mRNA-1  | Japonica | NA       |           | Os02g0653800 | OsR498G0204439300.01.T03 | GTP-binding protein YPTM2                                                  |
| maker-2-augustus-gene-271.6-mRNA-1  | Japonica | NA       |           |              | OsR498G0204441100.01.T02 | ATP-dependent caseinolytic protease/crotonase family protein               |
| maker-2-augustus-gene-272.32-mRNA-1 | Japonica | Indica   |           | Os02g0654100 | OsR498G0204441300.01.T02 | Methylglutaconyl-CoA hydratase, mitochondrial-like isoform X2              |
| maker-2-augustus-gene-272.35-mRNA-1 | Japonica | NA       | Kinase    | Os02g0654300 | OsR498G0204441700.01.T01 | Serine/threonine-protein kinase                                            |



|                                     |          |          |              |              |                          |                                                                   |
|-------------------------------------|----------|----------|--------------|--------------|--------------------------|-------------------------------------------------------------------|
| maker-2-augustus-gene-272.37-mRNA-1 | Japonica | NA       |              | Os02g0654500 | OsR498G0204442100.01.T01 | Ubiquitin carboxyl-terminal hydrolase                             |
| maker-2-augustus-gene-272.41-mRNA-1 | Japonica | NA       |              | Os02g0655100 | OsR498G0204443300.01.T01 | Brix domain-containing protein                                    |
| maker-2-augustus-gene-272.43-mRNA-1 | Japonica | NA       |              | Os02g0655500 | OsR498G0204445300.01.T01 | DUF862 domain-containing protein                                  |
| maker-2-augustus-gene-272.45-mRNA-1 | Japonica | NA       |              | Os02g0655700 | OsR498G0204446300.01.T01 | YfnA                                                              |
| maker-2-augustus-gene-272.49-mRNA-1 | Japonica | NA       |              |              |                          | Transcription initiation factor TFIID subunit 4b                  |
| maker-2-augustus-gene-272.54-mRNA-1 | Japonica | Japonica |              | Os02g0654600 | OsR498G0204442400.01.T01 | DUF632 domain-containing protein                                  |
| maker-2-augustus-gene-272.56-mRNA-1 | Japonica | NA       |              |              | OsR498G0204445600.01.T04 | DUF676 domain-containing protein                                  |
| maker-2-augustus-gene-273.0-mRNA-1  | Japonica | NA       |              | Os02g0656300 | OsR498G0204447900.01.T01 | Anaphase-promoting complex subunit 8 like                         |
| maker-2-augustus-gene-273.10-mRNA-1 | Japonica | NA       |              |              | OsR498G0204447800.01.T03 | Ceramide kinase                                                   |
| maker-2-augustus-gene-273.16-mRNA-1 | Japonica | NA       |              | Os02g0657700 | OsR498G0204452600.01.T03 |                                                                   |
| maker-2-augustus-gene-273.20-mRNA-1 | Japonica | NA       |              |              | OsR498G0204453600.01.T01 | PH domain-containing protein (Fragment)                           |
| maker-2-augustus-gene-273.4-mRNA-1  | Japonica | NA       |              | Os02g0656500 | OsR498G0204448500.01.T04 | DnaJ protein like                                                 |
| maker-2-augustus-gene-273.8-mRNA-1  | Japonica | NA       | Kinase-TM    | Os02g0655800 | OsR498G0204447000.01.T01 | Nodulation receptor kinase                                        |
| maker-2-augustus-gene-274.27-mRNA-1 | Japonica | NA       |              | Os02g0658300 |                          | protein NUCLEAR FUSION DEFECTIVE 6, chloroplastic/mitochondrial   |
| maker-2-augustus-gene-274.29-mRNA-1 | Japonica | NA       |              | Os02g0658600 | OsR498G0204456300.01.T01 | Expansin-like EG45 domain-containing protein                      |
| maker-2-augustus-gene-274.31-mRNA-1 | Japonica | NA       |              | Os02g0658800 | OsR498G0204457300.01.T01 | Beta-expansin 4                                                   |
| maker-2-augustus-gene-274.33-mRNA-1 | Japonica | NA       |              | Os02g0658100 | OsR498G0204454200.01.T01 | Aquaporin TIP2-1                                                  |
| maker-2-augustus-gene-274.36-mRNA-1 | Japonica | Indica   |              | Os02g0658200 | OsR498G0204454800.01.T02 | Zinc finger, FYVE/PHD-type                                        |
| maker-2-augustus-gene-274.39-mRNA-1 | Japonica | Indica   |              | Os02g0658500 | OsR498G0204455800.01.T01 | F-box domain-containing protein                                   |
| maker-2-augustus-gene-274.46-mRNA-1 | Japonica | NA       |              | Os02g0658900 | OsR498G0204458200.01.T02 | Vesicle transport protein SEC20                                   |
| maker-2-augustus-gene-275.11-mRNA-1 | Japonica | NA       |              | Os02g0661100 | OsR498G0204464600.01.T05 | Trehalose 6-phosphate phosphatase                                 |
| maker-2-augustus-gene-275.15-mRNA-1 | Japonica | NA       |              |              | OsR498G0204465800.01.T01 | PLATZ transcription factor family protein                         |
| maker-2-augustus-gene-275.2-mRNA-1  | Japonica | NA       |              |              | OsR498G0204462000.01.T01 | 4HBT domain-containing protein                                    |
| maker-2-augustus-gene-275.4-mRNA-1  | Japonica | NA       |              |              | OsR498G0204462000.01.T01 | 4HBT domain-containing protein                                    |
| maker-2-augustus-gene-275.6-mRNA-1  | Japonica | NA       |              |              | OsR498G0204463400.01.T01 | 4HBT domain-containing protein                                    |
| maker-2-augustus-gene-275.8-mRNA-1  | Japonica | NA       |              | Os02g0661000 | OsR498G0204464200.01.T01 | 40 kDa farnesylated protein associated with peroxisome            |
| maker-2-augustus-gene-276.0-mRNA-1  | Japonica | NA       |              |              | OsR498G0204467100.01.T02 | Vesicle-associated membraneprotein-like                           |
| maker-2-augustus-gene-276.11-mRNA-1 | Japonica | Indica   |              | Os02g0662300 | OsR498G0204469400.01.T01 |                                                                   |
| maker-2-augustus-gene-276.14-mRNA-1 | Japonica | NA       |              |              |                          | BEACH-type PH domain-containing protein                           |
| maker-2-augustus-gene-276.7-mRNA-1  | Japonica | NA       |              | Os02g0662200 | OsR498G0204468900.01.T01 | Nitrate transporter 1.1-like                                      |
| maker-2-augustus-gene-277.14-mRNA-1 | Japonica | NA       |              | Os02g0664300 | OsR498G0204475100.01.T01 | Tripeptidyl-peptidase II                                          |
| maker-2-augustus-gene-277.20-mRNA-1 | Japonica | Japonica |              | Os02g0663800 | OsR498G0409054800.01.T01 | Actin-dipolymerizing factor                                       |
| maker-2-augustus-gene-277.22-mRNA-1 | Japonica | NA       |              | Os02g0663900 | OsR498G0204474000.01.T02 | Phosphoribosylanthranilate transferase                            |
| maker-2-augustus-gene-277.24-mRNA-1 | Japonica | NA       |              |              | OsR498G0204476600.01.T02 |                                                                   |
| maker-2-augustus-gene-277.28-mRNA-1 | Japonica | NA       |              |              | OsR498G0204477000.01.T06 | Skin secretory protein xP2-like                                   |
| maker-2-augustus-gene-277.32-mRNA-1 | Japonica | NA       |              | Os02g0665000 | OsR498G0204477200.01.T04 | NADP-dependent malic enzyme, chloroplastic                        |
| maker-2-augustus-gene-277.4-mRNA-1  | Japonica | NA       |              |              |                          | Glycoprotein glucosyltransferase-like protein                     |
| maker-2-augustus-gene-278.0-mRNA-1  | Japonica | NA       |              | Os02g0665200 | OsR498G0204477500.01.T01 | Putative S-adenosylmethionine carrier 2, chloroplastic isoform X1 |
| maker-2-augustus-gene-278.11-mRNA-1 | Japonica | NA       |              | Os02g0666200 | OsR498G0204480100.01.T02 | Plasma membrane intrinsic protein 1                               |
| maker-2-augustus-gene-278.15-mRNA-1 | Japonica | NA       | Kinase-TM    | Os02g0666300 | OsR498G0204480400.01.T02 | Putative MAPKKK family protein kinase isoform 1                   |
| maker-2-augustus-gene-278.16-mRNA-1 | Japonica | NA       |              | Os02g0666300 | OsR498G0204480400.01.T05 | Putative MAPKKK family protein kinase isoform 1                   |
| maker-2-augustus-gene-278.25-mRNA-1 | Japonica | NA       |              |              | OsR498G0204481800.01.T01 |                                                                   |
| maker-2-augustus-gene-278.3-mRNA-1  | Japonica | NA       | CC-Kinase-TM |              | OsR498G0204478300.01.T02 | E3 ubiquitin ligase                                               |
| maker-2-augustus-gene-278.7-mRNA-1  | Japonica | NA       | CC-Kinase-TM |              | OsR498G0204478700.01.T01 | E3 ubiquitin ligase                                               |
| maker-2-augustus-gene-279.0-mRNA-1  | Japonica | NA       |              |              | OsR498G0204483700.01.T02 | tetracycline resistance protein, class D-like isoform X2          |
| maker-2-augustus-gene-279.11-mRNA-1 | Japonica | NA       |              | Os02g0667600 | OsR498G0204484000.01.T01 | Late embryogenesis abundant protein 5                             |
| maker-2-augustus-gene-279.13-mRNA-1 | Japonica | Indica   |              | Os02g0668500 | OsR498G0204485800.01.T02 | Cellular retinaldehyde-binding/triple function                    |
| maker-2-augustus-gene-279.16-mRNA-1 | Japonica | NA       |              |              | OsR498G0204488000.01.T01 | Putative anter-specific proline-rich protein APG                  |
| maker-2-augustus-gene-279.18-mRNA-1 | Japonica | NA       |              | Os02g0669000 | OsR498G0204488200.01.T01 | GSDL-motif protein lipase                                         |
| maker-2-augustus-gene-279.20-mRNA-1 | Japonica | NA       |              | Os02g0669700 | OsR498G0204491200.01.T03 | RRM domain-containing protein (Fragment)                          |
| maker-2-augustus-gene-279.5-mRNA-1  | Japonica | NA       |              | Os02g0668000 | OsR498G0204484700.01.T01 | Mechanosensitive ion channel protein                              |
| maker-2-augustus-gene-279.9-mRNA-1  | Japonica | NA       |              | Os02g0668400 | OsR498G0204485500.01.T02 | tRNA pseudouridine synthase A                                     |
| maker-2-augustus-gene-28.0-mRNA-1   | Japonica | NA       |              | Os02g0149600 | OsR498G0202977300.01.T01 | Serrate RNA effector molecule                                     |
| maker-2-augustus-gene-28.10-mRNA-1  | Japonica | NA       |              | Os02g0150300 | OsR498G0202980900.01.T01 | Apoptosis-inducing factor B like                                  |
| maker-2-augustus-gene-28.22-mRNA-1  | Japonica | Indica   |              | Os02g0150100 | OsR498G0202980400.01.T02 | DEAD-box ATP-dependent RNA helicase 35A                           |
| maker-2-augustus-gene-28.3-mRNA-1   | Japonica | NA       |              | Os02g0149800 | OsR498G0202977900.01.T01 | Protein-serine/threonine phosphatase                              |
| maker-2-augustus-gene-28.8-mRNA-1   | Japonica | NA       |              |              | OsR498G0202979100.01.T01 | Putative homeobox-leucine zipper protein HOX26                    |
| maker-2-augustus-gene-280.0-mRNA-1  | Japonica | NA       |              |              | OsR498G0409073100.01.T01 | DUF632 domain-containing protein                                  |
| maker-2-augustus-gene-280.10-mRNA-1 | Japonica | NA       | Kinase       | Os02g0670100 | OsR498G0204492800.01.T01 | probable serine/threonine-protein kinase PIX13                    |
| maker-2-augustus-gene-280.13-mRNA-1 | Japonica | NA       |              | Os02g0671300 | OsR498G0204495600.01.T02 | BHLH domain-containing protein (Fragment)                         |
| maker-2-augustus-gene-280.2-mRNA-1  | Japonica | NA       |              | Os02g0670400 | OsR498G0204493100.01.T01 | High mobility group box protein 2                                 |

|                                     |          |          |           |              |                          |                                                                            |
|-------------------------------------|----------|----------|-----------|--------------|--------------------------|----------------------------------------------------------------------------|
| maker-2-augustus-gene-280.6-mRNA-1  | Japonica | NA       |           |              |                          | Lazarus                                                                    |
| maker-2-augustus-gene-281.0-mRNA-1  | Japonica | Japonica |           | Os02g0672100 | OsR498G0409085900.01.T05 | Naked endosperm2                                                           |
| maker-2-augustus-gene-281.15-mRNA-1 | Japonica | NA       |           |              | OsR498G0204500600.01.T01 | THUMP domain-containing protein                                            |
| maker-2-augustus-gene-281.17-mRNA-1 | Japonica | NA       |           | Os02g0672400 | OsR498G0204500800.01.T06 | THUMP domain-containing protein                                            |
| maker-2-augustus-gene-281.2-mRNA-1  | Japonica | NA       |           |              | OsR498G0204500300.01.T01 | HTH myb-type domain-containing protein                                     |
| maker-2-augustus-gene-281.24-mRNA-1 | Japonica | NA       | Kinase-TM | Os02g0672800 | OsR498G0204501800.01.T01 | Serine/threonine-protein kinase WNK8                                       |
| maker-2-augustus-gene-281.29-mRNA-1 | Japonica | NA       |           | Os02g0673100 | OsR498G0204503000.01.T02 | Aluminum-activated malate transporter 10                                   |
| maker-2-augustus-gene-281.4-mRNA-1  | Japonica | NA       |           | Os02g0672600 | OsR498G0204501100.01.T01 | N6-adenosine-methyltransferase MT-A70-like                                 |
| maker-2-augustus-gene-281.8-mRNA-1  | Japonica | NA       |           | Os02g0672200 | OsR498G0204500000.01.T01 | Cytochrome f                                                               |
| maker-2-augustus-gene-282.24-mRNA-1 | Japonica | NA       |           | Os02g0673500 | OsR498G0204505500.01.T02 | Transcription factor bHLH157                                               |
| maker-2-augustus-gene-282.29-mRNA-1 | Japonica | NA       |           | Os02g0673600 | OsR498G0204505700.01.T01 | ORMDL                                                                      |
| maker-2-augustus-gene-282.32-mRNA-1 | Japonica | NA       |           | Os02g0674700 | OsR498G0204510200.01.T01 | E3 ubiquitin-protein ligase                                                |
| maker-2-augustus-gene-282.36-mRNA-1 | Japonica | NA       |           | Os02g0674800 | OsR498G0204510600.01.T01 | Homeobox-leucine zipper protein ROC5                                       |
| maker-2-augustus-gene-283.29-mRNA-1 | Japonica | NA       | LRR       | Os02g0675800 | OsR498G0204514700.01.T03 | RING/U-box superfamily protein                                             |
| maker-2-augustus-gene-283.32-mRNA-1 | Japonica | NA       |           | Os02g0676000 | OsR498G0204515700.01.T02 | Lysophospholipid acyltransferase                                           |
| maker-2-augustus-gene-283.37-mRNA-1 | Japonica | Indica   |           | Os04g0570000 | OsR498G0204512600.01.T01 | Cytochrome P450 family 87 subfamily A polypeptide 2                        |
| maker-2-augustus-gene-283.40-mRNA-1 | Japonica | NA       |           | Os02g0675700 | OsR498G0204514000.01.T01 | Methyltransferase                                                          |
| maker-2-augustus-gene-284.29-mRNA-1 | Japonica | Japonica |           | Os02g0676500 | OsR498G0204517300.01.T01 | Putative RING-H2 finger protein ATL62                                      |
| maker-2-augustus-gene-284.32-mRNA-1 | Japonica | NA       |           |              | OsR498G0204522900.01.T01 | Zinc finger CCH domain-containing protein 17                               |
| maker-2-augustus-gene-284.37-mRNA-1 | Japonica | NA       |           | Os02g0676600 |                          | Harbinger transposon protein                                               |
| maker-2-augustus-gene-284.39-mRNA-1 | Japonica | NA       |           | Os02g0677600 | OsR498G0204522800.01.T01 | Auxin transport protein like                                               |
| maker-2-augustus-gene-284.42-mRNA-1 | Japonica | NA       |           |              | OsR498G0204523200.01.T01 | Cytoplasmatic ribosomal protein S13                                        |
| maker-2-augustus-gene-285.46-mRNA-1 | Japonica | Indica   |           | Os04g0573000 | OsR498G0204524700.01.T05 | SPX domain-containing membrane protein                                     |
| maker-2-augustus-gene-285.51-mRNA-1 | Japonica | Indica   |           | Os04g0573100 | OsR498G0204524900.01.T01 | Mandelonitrile lyase                                                       |
| maker-2-augustus-gene-285.55-mRNA-1 | Japonica | NA       |           | Os02g0678400 | OsR498G0204525700.01.T03 | UDP-L-rhamnose synthase                                                    |
| maker-2-augustus-gene-285.58-mRNA-1 | Japonica | NA       |           | Os02g0678800 | OsR498G0204526100.01.T01 | Growth-regulating factor                                                   |
| maker-2-augustus-gene-285.60-mRNA-1 | Japonica | Indica   |           | Os02g0679500 | OsR498G0204527700.01.T01 | Rho GTPase-activating protein gacA                                         |
| maker-2-augustus-gene-285.64-mRNA-1 | Japonica | NA       |           | Os02g0680400 | OsR498G0204529300.01.T01 | CAAX prenyl protease                                                       |
| maker-2-augustus-gene-285.69-mRNA-1 | Japonica | NA       |           | Os02g0679200 | OsR498G0204527200.01.T03 | Pentatricopeptide repeat                                                   |
| maker-2-augustus-gene-285.70-mRNA-1 | Japonica | NA       |           | Os02g0680600 | OsR498G0204529800.01.T01 | 2-C-methyl-D-erythritol 2,4-cyclodiphosphate synthase                      |
| maker-2-augustus-gene-285.72-mRNA-1 | Japonica | NA       |           |              |                          | HTH myb-type domain-containing protein                                     |
| maker-2-augustus-gene-286.0-mRNA-1  | Japonica | NA       |           | Os02g0681000 | OsR498G0204531300.01.T04 | Mechanosensitive ion channel protein MscS                                  |
| maker-2-augustus-gene-286.14-mRNA-1 | Japonica | NA       |           | Os02g0681100 | OsR498G0204531600.01.T01 | Putative DUF604-domain containing/glycosyltransferase-related family prot  |
| maker-2-augustus-gene-286.7-mRNA-1  | Japonica | Indica   | Kinase-TM | Os02g0681700 | OsR498G0204533500.01.T01 | Serine/threonine receptor-like protein kinase NFP                          |
| maker-2-augustus-gene-286.9-mRNA-1  | Japonica | NA       |           | Os02g0682200 | OsR498G0204536100.01.T01 | MADS box transcription factor                                              |
| maker-2-augustus-gene-287.33-mRNA-1 | Japonica | Japonica |           | Os02g0682700 | OsR498G0204538300.01.T02 | RING-H2 zinc finger protein-like                                           |
| maker-2-augustus-gene-287.37-mRNA-1 | Japonica | NA       |           | Os02g0683800 | OsR498G0204543900.01.T02 | HMA domain-containing protein (Fragment)                                   |
| maker-2-augustus-gene-287.39-mRNA-1 | Japonica | NA       |           | Os02g0683900 | OsR498G0204544100.01.T04 | Tobamovirus multiplication protein 3                                       |
| maker-2-augustus-gene-287.44-mRNA-1 | Japonica | Indica   |           | Os02g0684300 | OsR498G0204545100.01.T01 | Nucleoporin protein Ndc1-Nup                                               |
| maker-2-augustus-gene-287.47-mRNA-1 | Japonica | NA       |           | Os02g0682600 | OsR498G0204538000.01.T01 | Mitochondrial import inner membrane translocase subunit                    |
| maker-2-augustus-gene-287.51-mRNA-1 | Japonica | NA       |           | Os02g0684200 |                          | p-loop containing nucleoside triphosphate hydrolase superfamily protein    |
| maker-2-augustus-gene-287.53-mRNA-1 | Japonica | NA       |           | Os02g0684400 | OsR498G0204545400.01.T01 | Oxidative stress 3                                                         |
| maker-2-augustus-gene-288.0-mRNA-1  | Japonica | NA       |           |              | OsR498G0204546300.01.T04 | Transaldolase                                                              |
| maker-2-augustus-gene-288.10-mRNA-1 | Japonica | NA       |           | Os02g0685200 | OsR498G0204548800.01.T01 | HTH myb-type domain-containing protein (Fragment)                          |
| maker-2-augustus-gene-288.14-mRNA-1 | Japonica | NA       |           |              | OsR498G1120528300.01.T01 | PMD domain-containing protein                                              |
| maker-2-augustus-gene-288.17-mRNA-1 | Japonica | NA       |           | Os02g0685600 | OsR498G0204550600.01.T05 | Protein-serine/threonine phosphatase                                       |
| maker-2-augustus-gene-288.2-mRNA-1  | Japonica | Indica   |           | Os04g0583700 | OsR498G0204547300.01.T02 | Regulator of chromosome condensation (RCC1) family with FYVE zinc finger   |
| maker-2-augustus-gene-288.6-mRNA-1  | Japonica | NA       | Kinase-TM | Os02g0685900 | OsR498G0204551100.01.T01 | Calcium-dependent protein kinase                                           |
| maker-2-augustus-gene-289.0-mRNA-1  | Japonica | NA       |           | Os02g0686400 | OsR498G0204553900.01.T01 | Aspartyl-tRNA synthetase                                                   |
| maker-2-augustus-gene-289.10-mRNA-1 | Japonica | NA       |           | Os02g0686600 | OsR498G0204554400.01.T01 | Metal-dependent protein hydrolase                                          |
| maker-2-augustus-gene-289.14-mRNA-1 | Japonica | NA       |           |              |                          | FLZ-type domain-containing protein (Fragment)                              |
| maker-2-augustus-gene-289.16-mRNA-1 | Japonica | NA       |           | Os02g0686800 | OsR498G0204555800.01.T01 | FLZ-type domain-containing protein (Fragment)                              |
| maker-2-augustus-gene-289.18-mRNA-1 | Japonica | Indica   |           | Os04g0586000 | OsR498G0204556400.01.T01 | FLZ-type domain-containing protein (Fragment)                              |
| maker-2-augustus-gene-289.20-mRNA-1 | Japonica | NA       |           |              | OsR498G0204557000.01.T01 | RRM domain-containing protein                                              |
| maker-2-augustus-gene-289.22-mRNA-1 | Japonica | NA       |           | Os02g0687200 | OsR498G0204557600.01.T01 | FLZ-type domain-containing protein (Fragment)                              |
| maker-2-augustus-gene-289.24-mRNA-1 | Japonica | NA       |           |              | OsR498G0204558400.01.T02 | S-ribonuclease binding protein SBP1                                        |
| maker-2-augustus-gene-289.4-mRNA-1  | Japonica | NA       |           |              | OsR498G0204554100.01.T01 | F-box/WD repeat-containing protein pof10                                   |
| maker-2-augustus-gene-289.6-mRNA-1  | Japonica | NA       |           | Os02g0686300 |                          | Glycosyltransferase                                                        |
| maker-2-augustus-gene-290.0-mRNA-1  | Japonica | NA       |           | Os02g0687900 | OsR498G0204560700.01.T05 |                                                                            |
| maker-2-augustus-gene-290.11-mRNA-1 | Japonica | NA       |           |              | OsR498G0204568700.01.T02 | VAN3-binding protein-like                                                  |
| maker-2-augustus-gene-290.13-mRNA-1 | Japonica | NA       |           | Os02g0688900 | OsR498G0204565000.01.T02 | phosphatidylinositol glycan anchor biosynthesis class U protein isoform X1 |

|                                     |          |          |  |              |                          |                                                                   |
|-------------------------------------|----------|----------|--|--------------|--------------------------|-------------------------------------------------------------------|
| maker-2-augustus-gene-290.6-mRNA-1  | Japonica | NA       |  | Os02g0688500 | OsR498G0204562900.01.T01 | Alpha-1,3-glucosyltransferase                                     |
| maker-2-augustus-gene-290.9-mRNA-1  | Japonica | NA       |  | Os02g0689200 | OsR498G0204565900.01.T02 |                                                                   |
| maker-2-augustus-gene-291.13-mRNA-1 | Japonica | Indica   |  | Os02g0691500 | OsR498G0204574100.01.T01 | Transcription factor bHLH71                                       |
| maker-2-augustus-gene-291.16-mRNA-1 | Japonica | Indica   |  | Os02g0689800 | OsR498G0204569400.01.T02 | Protein PHOTOPERIOD-INDEPENDENT EARLY FLOWERING                   |
| maker-2-augustus-gene-291.21-mRNA-1 | Japonica | NA       |  | Os02g0689900 | OsR498G0204569800.01.T04 | Nitrate transporter 1.5                                           |
| maker-2-augustus-gene-291.3-mRNA-1  | Japonica | NA       |  | Os02g0690700 | OsR498G0204572300.01.T01 | MHD domain-containing protein                                     |
| maker-2-augustus-gene-291.8-mRNA-1  | Japonica | NA       |  | Os02g0690800 | OsR498G0204572900.01.T01 | Metalloexopeptidase                                               |
| maker-2-augustus-gene-292.41-mRNA-1 | Japonica | NA       |  |              | OsR498G0204580300.01.T04 | USP domain-containing protein (Fragment)                          |
| maker-2-augustus-gene-292.47-mRNA-1 | Japonica | Japonica |  | Os02g0692700 | OsR498G0204577600.01.T01 | PLATZ transcription factor                                        |
| maker-2-augustus-gene-292.50-mRNA-1 | Japonica | NA       |  | Os02g0693200 | OsR498G0204580000.01.T02 | J domain-containing protein                                       |
| maker-2-augustus-gene-292.53-mRNA-1 | Japonica | Japonica |  | Os02g0693500 | OsR498G0204580600.01.T01 | SNARE associated Golgi protein family                             |
| maker-2-augustus-gene-293.0-mRNA-1  | Japonica | NA       |  |              | OsR498G0204582900.01.T08 | Auxin response factor                                             |
| maker-2-augustus-gene-293.11-mRNA-1 | Japonica | NA       |  | Os02g0694700 | OsR498G0204583700.01.T01 | E3 ubiquitin-protein ligase RNF14                                 |
| maker-2-augustus-gene-293.13-mRNA-1 | Japonica | NA       |  | Os02g0695600 | OsR498G0204586500.01.T01 |                                                                   |
| maker-2-augustus-gene-293.15-mRNA-1 | Japonica | NA       |  | Os02g0693700 | OsR498G0204581000.01.T01 | ABC transporter                                                   |
| maker-2-augustus-gene-293.23-mRNA-1 | Japonica | NA       |  | Os02g0694100 | OsR498G0204582200.01.T01 | FBD domain-containing protein (Fragment)                          |
| maker-2-augustus-gene-293.25-mRNA-1 | Japonica | NA       |  |              | OsR498G0204582800.01.T06 | Histone acetyltransferase MCC1                                    |
| maker-2-augustus-gene-293.29-mRNA-1 | Japonica | Indica   |  | Os02g0694800 | OsR498G0204584000.01.T02 | Protein kinase domain-containing protein                          |
| maker-2-augustus-gene-293.3-mRNA-1  | Japonica | NA       |  | Os02g0694400 | OsR498G0204583300.01.T05 | RBR-type E3 ubiquitin transferase                                 |
| maker-2-augustus-gene-293.33-mRNA-1 | Japonica | NA       |  | Os02g0695200 | OsR498G0204585000.01.T01 | Myb domain protein 58                                             |
| maker-2-augustus-gene-293.35-mRNA-1 | Japonica | Indica   |  | Os04g0594800 | OsR498G0204586800.01.T01 | Oligopeptide transporter                                          |
| maker-2-augustus-gene-293.5-mRNA-1  | Japonica | NA       |  |              | OsR498G0204583300.01.T01 | RBR-type E3 ubiquitin transferase                                 |
| maker-2-augustus-gene-293.8-mRNA-1  | Japonica | NA       |  |              | OsR498G0204583500.01.T01 | RWD domain-containing protein                                     |
| maker-2-augustus-gene-294.34-mRNA-1 | Japonica | NA       |  | Os02g0696500 | OsR498G0204588700.01.T01 | Xyloglucan endotransglucosylase/hydrolase                         |
| maker-2-augustus-gene-294.36-mRNA-1 | Japonica | NA       |  | Os02g0696700 | OsR498G0204589700.01.T04 | Lysine-specific demethylase lid                                   |
| maker-2-augustus-gene-294.42-mRNA-1 | Japonica | NA       |  |              |                          | SANT domain-containing protein                                    |
| maker-2-augustus-gene-294.46-mRNA-1 | Japonica | NA       |  | Os02g0697200 | OsR498G0204592100.01.T02 | Survival motor neuron protein                                     |
| maker-2-augustus-gene-294.50-mRNA-1 | Japonica | NA       |  | Os02g0697300 | OsR498G0204592300.01.T07 | MYB transcription factor 9                                        |
| maker-2-augustus-gene-294.53-mRNA-1 | Japonica | NA       |  | Os02g0697600 | OsR498G0204592900.01.T01 | 26S protease regulatory subunit 6A like                           |
| maker-2-augustus-gene-294.56-mRNA-1 | Japonica | NA       |  | Os02g0696600 |                          |                                                                   |
| maker-2-augustus-gene-294.58-mRNA-1 | Japonica | NA       |  | Os02g0697400 | OsR498G0204592600.01.T01 | Coumaroyl-CoA ligase                                              |
| maker-2-augustus-gene-294.61-mRNA-1 | Japonica | NA       |  |              | OsR498G0204592800.01.T01 | Pentatricopeptide repeat                                          |
| maker-2-augustus-gene-295.0-mRNA-1  | Japonica | Indica   |  | Os04g0595800 | OsR498G0204593300.01.T01 | Secretory carrier-associated membrane protein 5                   |
| maker-2-augustus-gene-295.12-mRNA-1 | Japonica | NA       |  | Os02g0699000 | OsR498G0204597100.01.T02 |                                                                   |
| maker-2-augustus-gene-295.15-mRNA-1 | Japonica | Indica   |  | Os10g0580200 | OsR498G0204597500.01.T03 | ADP-ribosylation factor                                           |
| maker-2-augustus-gene-295.20-mRNA-1 | Japonica | NA       |  |              |                          | GTP diphosphokinase                                               |
| maker-2-augustus-gene-295.23-mRNA-1 | Japonica | NA       |  |              | OsR498G0204598100.01.T01 | Helicase swr-1                                                    |
| maker-2-augustus-gene-295.27-mRNA-1 | Japonica | NA       |  | Os02g0697700 | OsR498G0204593200.01.T01 | Histone acetyltransferase mst1                                    |
| maker-2-augustus-gene-295.31-mRNA-1 | Japonica | Indica   |  | Os02g0699700 | OsR498G0204598600.01.T01 | DNA topoisomerase 2                                               |
| maker-2-augustus-gene-295.38-mRNA-1 | Japonica | NA       |  | Os02g0700000 | OsR498G0204599600.01.T03 | PWWP domain                                                       |
| maker-2-augustus-gene-295.5-mRNA-1  | Japonica | NA       |  | Os02g0698000 | OsR498G0204593700.01.T02 | Phosphoribulokinase                                               |
| maker-2-augustus-gene-295.9-mRNA-1  | Japonica | NA       |  | Os02g0698800 | OsR498G0204594500.01.T01 | DNA-binding WRKY                                                  |
| maker-2-augustus-gene-296.0-mRNA-1  | Japonica | NA       |  | Os02g0700100 | OsR498G0204599700.01.T03 | Cell division cycle protein 20                                    |
| maker-2-augustus-gene-296.10-mRNA-1 | Japonica | NA       |  | Os02g0701600 | OsR498G0204604100.01.T01 | Gamma tocopherol methyltransferase                                |
| maker-2-augustus-gene-296.14-mRNA-1 | Japonica | NA       |  | Os02g0700400 | OsR498G0204600600.01.T01 | Ubiquinol oxidase                                                 |
| maker-2-augustus-gene-296.16-mRNA-1 | Japonica | NA       |  | Os02g0700700 | OsR498G0204601200.01.T03 | Protein BREVIS RADIX                                              |
| maker-2-augustus-gene-296.18-mRNA-1 | Japonica | NA       |  | Os02g0701300 | OsR498G0204603200.01.T01 | Growth-regulating factor                                          |
| maker-2-augustus-gene-296.4-mRNA-1  | Japonica | NA       |  | Os02g0700300 | OsR498G0204600300.01.T01 | HTH myb-type domain-containing protein (Fragment)                 |
| maker-2-augustus-gene-297.47-mRNA-1 | Japonica | NA       |  | Os02g0701900 | OsR498G0204605500.01.T01 | 3-dehydrosphinganine reductase TSC10B                             |
| maker-2-augustus-gene-297.49-mRNA-1 | Japonica | NA       |  | Os02g0702000 | OsR498G0204605700.01.T01 | Homing endonuclease, LAGLIDADG                                    |
| maker-2-augustus-gene-297.51-mRNA-1 | Japonica | NA       |  | Os02g0702400 | OsR498G0204607500.01.T01 | Pectin acetyltransferase                                          |
| maker-2-augustus-gene-297.58-mRNA-1 | Japonica | Indica   |  | Os04g0601700 | OsR498G0204604400.01.T05 | V-type proton ATPase subunit G                                    |
| maker-2-augustus-gene-297.66-mRNA-1 | Japonica | NA       |  | Os02g0702500 | OsR498G0204608000.01.T04 | Protein kinase domain-containing protein                          |
| maker-2-augustus-gene-297.73-mRNA-1 | Japonica | NA       |  |              |                          | Plant specific Rop nucleotide exchanger, PRONE                    |
| maker-2-augustus-gene-297.76-mRNA-1 | Japonica | NA       |  |              | OsR498G0204609400.01.T01 | Allantoate deiminase isoform X1                                   |
| maker-2-augustus-gene-297.78-mRNA-1 | Japonica | NA       |  | Os02g0702800 | OsR498G0204609600.01.T01 | t-SNARE coiled-coil homology domain-containing protein (Fragment) |
| maker-2-augustus-gene-298.0-mRNA-1  | Japonica | Indica   |  | Os02g0703600 | OsR498G0204611500.01.T01 | Abscisic acid 8'-hydroxylase                                      |
| maker-2-augustus-gene-298.10-mRNA-1 | Japonica | NA       |  | Os02g0704500 | OsR498G0204613900.01.T01 | Lipid phosphate phosphatase epsilon 2 chloroplastic               |
| maker-2-augustus-gene-298.14-mRNA-1 | Japonica | NA       |  |              | OsR498G0204614500.01.T01 | Ornithine transcarbamylase                                        |
| maker-2-augustus-gene-298.16-mRNA-1 | Japonica | Japonica |  | Os02g0704300 | OsR498G0916748200.01.T04 | DNA-binding protein SMUBP-2                                       |
| maker-2-augustus-gene-298.18-mRNA-1 | Japonica | NA       |  | Os02g0704600 | OsR498G0204614200.01.T01 |                                                                   |

|                                     |          |          |           |              |                          |                                                                             |
|-------------------------------------|----------|----------|-----------|--------------|--------------------------|-----------------------------------------------------------------------------|
| maker-2-augustus-gene-298.20-mRNA-1 | Japonica | NA       |           | Os02g0704900 | OsR498G0204614800.01.T04 | Soluble inorganic pyrophosphatase                                           |
| maker-2-augustus-gene-298.4-mRNA-1  | Japonica | NA       |           | Os05g0394100 |                          | NAM-associated domain-containing protein                                    |
| maker-2-augustus-gene-298.6-mRNA-1  | Japonica | Japonica |           | Os02g0703900 | OsR498G0204612100.01.T04 | Auxin-induced protein 5NG4                                                  |
| maker-2-augustus-gene-299.0-mRNA-1  | Japonica | NA       |           | Os02g0705300 | OsR498G0204615900.01.T02 | Tubby-like F-box protein 5                                                  |
| maker-2-augustus-gene-299.11-mRNA-1 | Japonica | NA       |           | Os02g0705100 | OsR498G0204615400.01.T01 | Pheophytinase, chloroplastic                                                |
| maker-2-augustus-gene-299.14-mRNA-1 | Japonica | NA       |           | Os02g0705500 | OsR498G0204616600.01.T02 | BHLH transcription factor                                                   |
| maker-2-augustus-gene-299.18-mRNA-1 | Japonica | NA       |           | Os02g0705600 | OsR498G0204618400.01.T03 | RING-type E3 ubiquitin transferase                                          |
| maker-2-augustus-gene-299.3-mRNA-1  | Japonica | NA       |           | Os02g0705400 | OsR498G0204616300.01.T01 | Usp domain-containing protein (Fragment)                                    |
| maker-2-augustus-gene-299.6-mRNA-1  | Japonica | NA       |           |              | OsR498G0204615200.01.T02 | Replication factor C subunit 3                                              |
| maker-2-augustus-gene-299.8-mRNA-1  | Japonica | NA       |           | Os02g0705000 | OsR498G0204615200.01.T06 | NmrA domain-containing protein (Fragment)                                   |
| maker-2-augustus-gene-3.0-mRNA-1    | Japonica | NA       |           | Os02g0104700 | OsR498G0202812300.01.T03 | Nitric oxide synthase-associated protein I                                  |
| maker-2-augustus-gene-3.14-mRNA-1   | Japonica | NA       |           |              | OsR498G0202813300.01.T07 | Protein transport protein sec16                                             |
| maker-2-augustus-gene-3.26-mRNA-1   | Japonica | NA       |           | Os02g0105400 | OsR498G0202813900.01.T01 | L-lactate dehydrogenase A                                                   |
| maker-2-augustus-gene-3.28-mRNA-1   | Japonica | NA       |           | Os02g0105500 | OsR498G0202814300.01.T01 | BAG family molecular chaperone regulator 7                                  |
| maker-2-augustus-gene-3.30-mRNA-1   | Japonica | NA       |           |              | OsR498G0202814900.01.T02 | 40S ribosomal subunit protein S14                                           |
| maker-2-augustus-gene-3.31-mRNA-1   | Japonica | NA       |           | Os02g0106100 | OsR498G0202817500.01.T01 | Acid beta-fructofuranosidase                                                |
| maker-2-augustus-gene-3.4-mRNA-1    | Japonica | Indica   |           | Os02g0104800 | OsR498G0202812500.01.T01 | RNA-binding protein 48                                                      |
| maker-2-augustus-gene-3.41-mRNA-1   | Japonica | NA       |           | Os02g0105900 | OsR498G0202815400.01.T01 | S4 RNA-binding domain-containing protein (Fragment)                         |
| maker-2-augustus-gene-3.9-mRNA-1    | Japonica | NA       |           | Os02g0105000 | OsR498G0202812900.01.T02 | RNA-binding protein 48                                                      |
| maker-2-augustus-gene-300.36-mRNA-1 | Japonica | NA       |           | Os02g0706500 | OsR498G0204620100.01.T01 | Putative AAA-type ATPase                                                    |
| maker-2-augustus-gene-300.40-mRNA-1 | Japonica | Indica   |           | Os02g0708100 | OsR498G0204625500.01.T02 | Glutamine amidotransferase type-1 domain-containing protein (Fragment)      |
| maker-2-augustus-gene-300.46-mRNA-1 | Japonica | NA       |           | Os02g0708200 | OsR498G0204625700.01.T01 | Uridine-cytidine kinase C                                                   |
| maker-2-augustus-gene-300.51-mRNA-1 | Japonica | Indica   |           | Os02g0708300 | OsR498G0204625900.01.T03 | RING-box protein 1a isoform B                                               |
| maker-2-augustus-gene-300.55-mRNA-1 | Japonica | Indica   |           | Os02g0706900 | OsR498G0204621800.01.T01 | AB hydrolase-1 domain-containing protein (Fragment)                         |
| maker-2-augustus-gene-300.57-mRNA-1 | Japonica | Indica   |           | Os02g0707000 | OsR498G0204622200.01.T01 | Monodehydroascorbate reductase                                              |
| maker-2-augustus-gene-300.59-mRNA-1 | Japonica | NA       |           | Os02g0707100 | OsR498G0204622400.01.T01 | Monodehydroascorbate reductase                                              |
| maker-2-augustus-gene-300.63-mRNA-1 | Japonica | NA       |           | Os02g0707200 | OsR498G0204622600.01.T02 | Dof zinc finger protein 12                                                  |
| maker-2-augustus-gene-300.65-mRNA-1 | Japonica | NA       |           | Os02g0707900 | OsR498G0204624800.01.T03 | Ethylene response protein                                                   |
| maker-2-augustus-gene-301.26-mRNA-1 | Japonica | NA       |           |              | OsR498G0204626700.01.T01 | Putative SET-domain transcriptional regulator                               |
| maker-2-augustus-gene-301.34-mRNA-1 | Japonica | NA       |           | Os02g0709000 | OsR498G0204628700.01.T01 | C2H2L domain class transcription factor                                     |
| maker-2-augustus-gene-301.36-mRNA-1 | Japonica | NA       |           | Os02g0709400 | OsR498G0204630500.01.T02 | Calpain-type cysteine protease DEK1                                         |
| maker-2-augustus-gene-301.42-mRNA-1 | Japonica | Indica   |           | Os05g0577100 | OsR498G0204631100.01.T02 | Plant-specific domain TIGR01570 family protein                              |
| maker-2-augustus-gene-301.44-mRNA-1 | Japonica | NA       |           | Os02g0708400 | OsR498G0204626200.01.T02 | Kinesin light chain                                                         |
| maker-2-augustus-gene-301.47-mRNA-1 | Japonica | NA       |           |              | OsR498G0204629000.01.T01 |                                                                             |
| maker-2-augustus-gene-301.49-mRNA-1 | Japonica | NA       |           | Os02g0709200 | OsR498G0204629400.01.T01 | Histidinol-phosphate aminotransferase 2 chloroplastic                       |
| maker-2-augustus-gene-301.52-mRNA-1 | Japonica | NA       |           | Os02g0709800 | OsR498G0204632400.01.T06 | RabGAP/TBC domain-containing protein (Fragment)                             |
| maker-2-augustus-gene-301.58-mRNA-1 | Japonica | NA       |           | Os02g0709900 | OsR498G0204632600.01.T03 | Protein CROWDED NUCLEI 1                                                    |
| maker-2-augustus-gene-302.30-mRNA-1 | Japonica | NA       |           | Os02g0710300 | OsR498G0204634900.01.T01 | Transcription factor bHLH83                                                 |
| maker-2-augustus-gene-302.32-mRNA-1 | Japonica | NA       | Kinase-TM | Os02g0710500 | OsR498G0204635700.01.T01 | Liguleless narrow                                                           |
| maker-2-augustus-gene-302.37-mRNA-1 | Japonica | NA       |           | Os02g0710700 | OsR498G0204636700.01.T01 | Laccase                                                                     |
| maker-2-augustus-gene-302.39-mRNA-1 | Japonica | NA       |           |              | OsR498G0204636900.01.T02 | ATP-dependent DNA helicase RecG                                             |
| maker-2-augustus-gene-302.45-mRNA-1 | Japonica | NA       |           | Os02g0710900 | OsR498G0204637100.01.T01 | Heat shock protein 17                                                       |
| maker-2-augustus-gene-302.50-mRNA-1 | Japonica | NA       |           |              | OsR498G0204637500.01.T03 | p-loop containing nucleoside triphosphate hydrolases superfamily protein is |
| maker-2-augustus-gene-302.53-mRNA-1 | Japonica | NA       |           |              | OsR498G0204633400.01.T01 |                                                                             |
| maker-2-augustus-gene-302.55-mRNA-1 | Japonica | Indica   |           | Os02g0711000 | OsR498G0204637400.01.T04 | Pentatricopeptide repeat-containing protein (Fragment)                      |
| maker-2-augustus-gene-303.0-mRNA-1  | Japonica | NA       |           | Os02g0713400 | OsR498G0204643100.01.T01 | Thioredoxin reductase NTRB                                                  |
| maker-2-augustus-gene-303.13-mRNA-1 | Japonica | NA       |           | Os02g0712400 |                          | AP2 domain class transcription factor                                       |
| maker-2-augustus-gene-303.14-mRNA-1 | Japonica | NA       |           | Os02g0712500 | OsR498G0204640800.01.T01 | Glycosyltransferase family 92 protein (Fragment)                            |
| maker-2-augustus-gene-303.16-mRNA-1 | Japonica | NA       | Kinase-TM | Os02g0712600 | OsR498G0204641600.01.T01 | Lectin receptor kinase                                                      |
| maker-2-augustus-gene-303.18-mRNA-1 | Japonica | NA       | Kinase-TM | Os02g0712700 | OsR498G0204641800.01.T01 | Lectin receptor kinase 1                                                    |
| maker-2-augustus-gene-303.2-mRNA-1  | Japonica | NA       |           | Os02g0713600 |                          | Zinc finger BED domain-containing protein RICESLEEPER 2                     |
| maker-2-augustus-gene-303.21-mRNA-1 | Japonica | NA       |           | Os02g0713500 |                          | F-box domain-containing protein                                             |
| maker-2-augustus-gene-303.23-mRNA-1 | Japonica | NA       |           | Os02g0713700 | OsR498G0204645000.01.T02 | PPC domain-containing protein (Fragment)                                    |
| maker-2-augustus-gene-303.4-mRNA-1  | Japonica | NA       |           | Os02g0711900 | OsR498G0204639600.01.T01 | Trithorax group protein osa-like                                            |
| maker-2-augustus-gene-303.6-mRNA-1  | Japonica | Indica   |           | Os02g0712000 | OsR498G0204639800.01.T04 | Pro-apoptotic serine protease NMA111                                        |
| maker-2-augustus-gene-304.31-mRNA-1 | Japonica | NA       |           | Os02g0714000 | OsR498G0204646900.01.T01 | RRM domain-containing protein                                               |
| maker-2-augustus-gene-304.37-mRNA-1 | Japonica | NA       |           | Os02g0714600 | OsR498G0204648300.01.T01 | Ribose-phosphate pyrophosphokinase 4                                        |
| maker-2-augustus-gene-304.41-mRNA-1 | Japonica | NA       |           |              |                          | Peptidase S1 and S6 chymotrypsin/Hap                                        |
| maker-2-augustus-gene-304.44-mRNA-1 | Japonica | NA       |           | Os02g0715000 | OsR498G0204650300.01.T01 | Cysteine protease XCP1                                                      |
| maker-2-augustus-gene-304.46-mRNA-1 | Japonica | NA       |           | Os02g0715200 | OsR498G0204650700.01.T02 | Short-chain dehydrogenase/reductase family 42E member 1                     |
| maker-2-augustus-gene-304.50-mRNA-1 | Japonica | Indica   |           | Os08g0512700 | OsR498G0204646800.01.T02 | 3-hydroxy-3-methylglutaryl coenzyme A reductase                             |

|                                     |          |          |           |              |                          |                                                                        |
|-------------------------------------|----------|----------|-----------|--------------|--------------------------|------------------------------------------------------------------------|
| maker-2-augustus-gene-304.54-mRNA-1 | Japonica | NA       |           | Os02g0714100 | OsR498G0204647200.01.T04 | Acyltransferase                                                        |
| maker-2-augustus-gene-304.59-mRNA-1 | Japonica | NA       |           | Os02g0714200 | OsR498G0204647600.01.T02 | Pyrophosphate--fructose 6-phosphate 1-phosphotransferase subunit alpha |
| maker-2-augustus-gene-304.65-mRNA-1 | Japonica | NA       |           | Os02g0714300 | OsR498G0204647800.01.T04 | AT-rich interactive domain-containing protein 3                        |
| maker-2-augustus-gene-305.0-mRNA-1  | Japonica | NA       |           | Os02g0717100 | OsR498G0204654300.01.T02 | Transcriptional regulator ATRX-like                                    |
| maker-2-augustus-gene-305.11-mRNA-1 | Japonica | NA       |           | Os02g0717400 | OsR498G0204656200.01.T02 | Clustered mitochondria protein homolog                                 |
| maker-2-augustus-gene-305.2-mRNA-1  | Japonica | NA       |           | Os02g0717300 | OsR498G0204655300.01.T02 | Outer envelope pore protein like                                       |
| maker-2-augustus-gene-305.4-mRNA-1  | Japonica | NA       |           | Os02g0717500 | OsR498G0204656700.01.T01 | Flavonol synthase/flavanone 3-hydroxylase                              |
| maker-2-augustus-gene-305.8-mRNA-1  | Japonica | NA       |           | Os02g0716800 | OsR498G0204653800.01.T02 | Nitrate transporter 1.5                                                |
| maker-2-augustus-gene-306.0-mRNA-1  | Japonica | NA       |           | Os02g0718900 | OsR498G0204659500.01.T02 | ADP,ATP carrier protein, mitochondrial                                 |
| maker-2-augustus-gene-306.12-mRNA-1 | Japonica | NA       |           | Os02g0719600 | OsR498G0204661700.01.T01 | Anthranilate O-methyltransferase 2                                     |
| maker-2-augustus-gene-306.2-mRNA-1  | Japonica | NA       |           | Os02g0719000 | OsR498G0204659900.01.T01 | Rho protein GDP-dissociation inhibitor                                 |
| maker-2-augustus-gene-306.20-mRNA-1 | Japonica | NA       |           |              | OsR498G0204662700.01.T02 | PHD-type domain-containing protein                                     |
| maker-2-augustus-gene-306.22-mRNA-1 | Japonica | NA       |           | Os02g0720200 | OsR498G0204663300.01.T01 | 65-kDa microtubule-associated protein 1                                |
| maker-2-augustus-gene-306.25-mRNA-1 | Japonica | NA       |           | Os02g0720300 | OsR498G0204663500.01.T01 | Protein-tyrosine-phosphatase IBR5                                      |
| maker-2-augustus-gene-306.28-mRNA-1 | Japonica | NA       |           |              | OsR498G0204657000.01.T01 | Cobryic acid synthase                                                  |
| maker-2-augustus-gene-306.34-mRNA-1 | Japonica | Indica   |           | Os02g0717800 | OsR498G0204665700.01.T01 | 60S ribosomal protein L31                                              |
| maker-2-augustus-gene-306.36-mRNA-1 | Japonica | NA       |           | Os02g0720100 | OsR498G0204663200.01.T01 | Phytoecyanin domain-containing protein (Fragment)                      |
| maker-2-augustus-gene-306.7-mRNA-1  | Japonica | NA       |           | Os02g0719100 | OsR498G0204660100.01.T04 | Fimbrin 1                                                              |
| maker-2-augustus-gene-307.0-mRNA-1  | Japonica | Indica   |           | Os06g0610800 | OsR498G0204664300.01.T02 | Putative chloroplast nucleoid DNA-binding protein cnd41                |
| maker-2-augustus-gene-307.14-mRNA-1 | Japonica | NA       |           | Os02g0721100 | OsR498G0204666800.01.T01 | Putative ubiquitin-conjugating enzyme 11                               |
| maker-2-augustus-gene-307.16-mRNA-1 | Japonica | Indica   |           | Os02g0721100 | OsR498G0204669000.01.T01 | UBC core domain-containing protein (Fragment)                          |
| maker-2-augustus-gene-307.18-mRNA-1 | Japonica | NA       |           | Os02g0721600 | OsR498G0204669200.01.T02 | WD-repeat protein-like                                                 |
| maker-2-augustus-gene-307.19-mRNA-1 | Japonica | NA       |           | Os02g0721600 | OsR498G0204669200.01.T03 | WD-repeat protein-like                                                 |
| maker-2-augustus-gene-307.2-mRNA-1  | Japonica | NA       |           | Os02g0720900 |                          | Peptidase A1 domain-containing protein (Fragment)                      |
| maker-2-augustus-gene-307.26-mRNA-1 | Japonica | NA       |           | Os02g0721700 | OsR498G0204670000.01.T01 | GPI-anchored protein LLG1                                              |
| maker-2-augustus-gene-307.28-mRNA-1 | Japonica | NA       |           | Os02g0721800 | OsR498G0204670200.01.T03 | Phosphatidylinositol/phosphatidylcholine transfer protein SFH13        |
| maker-2-augustus-gene-307.33-mRNA-1 | Japonica | Indica   |           | Os07g0675400 | OsR498G0204671400.01.T03 | Tyrosyl-tRNA synthetase                                                |
| maker-2-augustus-gene-307.36-mRNA-1 | Japonica | Indica   |           | Os02g0722200 | OsR498G0204671400.01.T04 | Tyrosyl-tRNA synthetase                                                |
| maker-2-augustus-gene-307.4-mRNA-1  | Japonica | Japonica |           | Os02g0789700 | OsR498G1120753400.01.T01 |                                                                        |
| maker-2-augustus-gene-307.7-mRNA-1  | Japonica | Japonica |           | Os02g0720600 | OsR498G0611518800.01.T01 | Peptidase A1 domain-containing protein (Fragment)                      |
| maker-2-augustus-gene-307.9-mRNA-1  | Japonica | NA       |           | Os02g0720700 | OsR498G0204665200.01.T01 | Chloride channel protein CLC-f                                         |
| maker-2-augustus-gene-308.34-mRNA-1 | Japonica | NA       | CC-Kinase |              | OsR498G0204671700.01.T01 | Non-specific serine/threonine protein kinase                           |
| maker-2-augustus-gene-308.37-mRNA-1 | Japonica | NA       |           | Os02g0722400 | OsR498G0204672700.01.T01 | Amino acid permease 7                                                  |
| maker-2-augustus-gene-308.39-mRNA-1 | Japonica | NA       |           |              | OsR498G0204674100.01.T04 | KH domain-containing protein                                           |
| maker-2-augustus-gene-308.42-mRNA-1 | Japonica | NA       |           | Os02g0723700 | OsR498G0204678100.01.T01 | Bushy growth protein (Fragment)                                        |
| maker-2-augustus-gene-308.47-mRNA-1 | Japonica | NA       |           | Os02g0722500 | OsR498G0204673000.01.T02 | ADP-ribosylation factor GTPase-activating protein AGD12                |
| maker-2-augustus-gene-308.52-mRNA-1 | Japonica | NA       |           | Os02g0722800 | OsR498G0204674600.01.T01 | WD40, G-beta domain containing family protein, family                  |
| maker-2-augustus-gene-308.56-mRNA-1 | Japonica | NA       |           |              | OsR498G0204677000.01.T05 | RPOL4c domain-containing protein                                       |
| maker-2-augustus-gene-308.62-mRNA-1 | Japonica | NA       |           |              |                          | DNA-directed RNA polymerases I and III subunit RPAC1                   |
| maker-2-augustus-gene-309.0-mRNA-1  | Japonica | Indica   |           | Os02g0724000 | OsR498G0204681300.01.T06 | Zinc finger protein CONSTANS-LIKE 9                                    |
| maker-2-augustus-gene-309.15-mRNA-1 | Japonica | NA       | Kinase-TM | Os02g0725000 | OsR498G0204682900.01.T03 | serine/threonine-protein kinase D6PK                                   |
| maker-2-augustus-gene-309.23-mRNA-1 | Japonica | NA       |           | Os02g0725300 | OsR498G0204683900.01.T01 | Putative cellulose synthase (UDP-forming)                              |
| maker-2-augustus-gene-309.3-mRNA-1  | Japonica | Indica   |           | Os02g0724500 | OsR498G0204681900.01.T03 | TPT domain-containing protein (Fragment)                               |
| maker-2-augustus-gene-309.33-mRNA-1 | Japonica | Indica   |           | Os02g0725600 | OsR498G0204684900.01.T01 | tRNA (guanine(9)-N(1))-methyltransferase                               |
| maker-2-augustus-gene-309.36-mRNA-1 | Japonica | NA       |           | Os06g0682750 |                          | AAI domain-containing protein (Fragment)                               |
| maker-2-augustus-gene-309.38-mRNA-1 | Japonica | NA       |           | Os02g0725100 | OsR498G0204683400.01.T01 | Retrotransposon protein Ty1-copia subclass                             |
| maker-2-augustus-gene-309.42-mRNA-1 | Japonica | NA       |           | Os02g0725500 | OsR498G0204684600.01.T01 | Phytoecyanin domain-containing protein                                 |
| maker-2-augustus-gene-309.8-mRNA-1  | Japonica | Indica   |           | Os09g0551300 | OsR498G0204682100.01.T01 | tRNA and rRNA cytosine-C5-methylase (Nucleolar protein NOL1/NOP2)      |
| maker-2-augustus-gene-31.56-mRNA-1  | Japonica | NA       |           | Os02g0156100 | OsR498G0202996300.01.T01 | Protein kinase domain-containing protein                               |
| maker-2-augustus-gene-31.64-mRNA-1  | Japonica | NA       | LRR-TM    | Os02g0156800 | OsR498G0203001200.01.T02 | Tyrosine-sulfated glycopeptide receptor 1                              |
| maker-2-augustus-gene-310.35-mRNA-1 | Japonica | NA       |           | Os02g0726400 | OsR498G0204688500.01.T01 | BSD domain-containing protein (Fragment)                               |
| maker-2-augustus-gene-310.40-mRNA-1 | Japonica | Indica   |           | Os06g0284200 | OsR498G0204688900.01.T01 | O-fucosyltransferase family protein                                    |
| maker-2-augustus-gene-310.43-mRNA-1 | Japonica | NA       |           | Os02g0727300 | OsR498G0204690300.01.T02 | RING-type E3 ubiquitin transferase                                     |
| maker-2-augustus-gene-310.45-mRNA-1 | Japonica | NA       |           | Os02g0725900 | OsR498G0204686400.01.T01 | CCAAT-binding transcription factor                                     |
| maker-2-augustus-gene-310.47-mRNA-1 | Japonica | NA       |           |              |                          | Transcription factor BIM3                                              |
| maker-2-augustus-gene-310.53-mRNA-1 | Japonica | NA       |           | Os02g0727100 | OsR498G0204690000.01.T01 | System N amino acid transporter                                        |
| maker-2-augustus-gene-310.57-mRNA-1 | Japonica | NA       |           | Os02g0728100 | OsR498G0204693400.01.T05 | Signal peptide peptidase isoform 1                                     |
| maker-2-augustus-gene-311.51-mRNA-1 | Japonica | Indica   |           | Os02g0581300 | OsR498G0204693700.01.T02 | LAG1 longevity assurance homolog 3                                     |
| maker-2-augustus-gene-311.54-mRNA-1 | Japonica | NA       |           | Os02g0728700 | OsR498G0204695100.01.T02 | RRP7 domain-containing protein (Fragment)                              |
| maker-2-augustus-gene-311.57-mRNA-1 | Japonica | NA       |           |              | OsR498G0204695300.01.T01 | Putative senescence-associated protein 5                               |
| maker-2-augustus-gene-311.59-mRNA-1 | Japonica | NA       |           | Os02g0728900 |                          | Mediator of RNA polymerase II transcription subunit 11                 |

|                                     |          |          |               |              |                          |                                                                  |
|-------------------------------------|----------|----------|---------------|--------------|--------------------------|------------------------------------------------------------------|
| maker-2-augustus-gene-311.63-mRNA-1 | Japonica | NA       |               | Os02g0189000 | OsR498G0203126400.01.T01 |                                                                  |
| maker-2-augustus-gene-311.65-mRNA-1 | Japonica | NA       |               | Os02g0729100 | OsR498G0204696500.01.T01 | Leaf senescence protein-like                                     |
| maker-2-augustus-gene-311.68-mRNA-1 | Japonica | NA       |               | Os02g0729700 | OsR498G0204701500.01.T01 | Homeobox-leucine zipper protein HOX16                            |
| maker-2-augustus-gene-311.70-mRNA-1 | Japonica | Indica   | Kinase-LRR-TM | Os06g0274500 | OsR498G0204694200.01.T01 | Putative somatic embryogenesis protein kinase 1                  |
| maker-2-augustus-gene-311.77-mRNA-1 | Japonica | NA       |               | Os02g0728600 | OsR498G0204695000.01.T01 | Ribonucloprotein (Fragment)                                      |
| maker-2-augustus-gene-311.78-mRNA-1 | Japonica | Indica   |               | Os06g0272900 | OsR498G0204697000.01.T01 | Leaf senescence protein-like                                     |
| maker-2-augustus-gene-311.80-mRNA-1 | Japonica | NA       |               |              | OsR498G0204698800.01.T01 | Rhodanese domain-containing protein                              |
| maker-2-augustus-gene-311.83-mRNA-1 | Japonica | NA       |               | Os02g0729400 | OsR498G0204698800.01.T04 | Extracellular calcium sensing receptor                           |
| maker-2-augustus-gene-311.85-mRNA-1 | Japonica | NA       |               | Os02g0730000 | OsR498G0204703200.01.T02 | Aldehyde dehydrogenase2                                          |
| maker-2-augustus-gene-311.89-mRNA-1 | Japonica | Japonica |               | Os02g0730100 | OsR498G0204703400.01.T02 | Nop domain-containing protein (Fragment)                         |
| maker-2-augustus-gene-312.41-mRNA-1 | Japonica | NA       |               | Os02g0730400 | OsR498G0204705500.01.T01 | NHL repeat-containing protein 2                                  |
| maker-2-augustus-gene-312.46-mRNA-1 | Japonica | Indica   |               | Os06g0268800 | OsR498G0204706100.01.T01 | Aluminum-activated malate transporter like                       |
| maker-2-augustus-gene-312.48-mRNA-1 | Japonica | NA       |               | Os02g0730800 | OsR498G0204706700.01.T04 | Organelle RRM domain-containing protein 1, chloroplastic         |
| maker-2-augustus-gene-312.53-mRNA-1 | Japonica | NA       |               | Os02g0731200 | OsR498G0204707300.01.T06 | MADS-box transcription factor                                    |
| maker-2-augustus-gene-312.58-mRNA-1 | Japonica | NA       |               |              |                          | CAAD domain-containing protein (Fragment)                        |
| maker-2-augustus-gene-312.60-mRNA-1 | Japonica | NA       |               | Os02g0730500 | OsR498G0204705800.01.T01 | rRNA-processing protein fcf2                                     |
| maker-2-augustus-gene-312.63-mRNA-1 | Japonica | NA       |               | Os02g0730700 |                          | Aspartyl protease APCB1                                          |
| maker-2-augustus-gene-312.65-mRNA-1 | Japonica | Indica   |               | Os02g0731500 | OsR498G0204708400.01.T02 | ABA induced plasma membrane protein PM 19                        |
| maker-2-augustus-gene-312.68-mRNA-1 | Japonica | Indica   |               | Os02g0731700 | OsR498G0204708800.01.T01 | B-box zinc finger protein 10                                     |
| maker-2-augustus-gene-313.43-mRNA-1 | Japonica | NA       |               | Os02g0732200 | OsR498G0204711700.01.T03 | RING-type E3 ubiquitin transferase                               |
| maker-2-augustus-gene-313.47-mRNA-1 | Japonica | Indica   |               | Os06g0260000 | OsR498G0204712100.01.T01 | Tify domain-containing protein                                   |
| maker-2-augustus-gene-313.49-mRNA-1 | Japonica | NA       |               |              | OsR498G0204712500.01.T02 | Tify domain-containing protein                                   |
| maker-2-augustus-gene-313.53-mRNA-1 | Japonica | NA       |               | Os02g0732900 | OsR498G0204714500.01.T01 | APO protein 2 chloroplastic                                      |
| maker-2-augustus-gene-313.55-mRNA-1 | Japonica | NA       |               | Os02g0733300 | OsR498G0204716300.01.T01 | Endoglucanase                                                    |
| maker-2-augustus-gene-313.59-mRNA-1 | Japonica | NA       |               | Os02g0733800 | OsR498G0204717700.01.T03 | Rubis-sub5-bind domain-containing protein (Fragment)             |
| maker-2-augustus-gene-313.65-mRNA-1 | Japonica | NA       |               | Os02g0732600 | OsR498G0204713400.01.T01 | Myb-related transcription factor                                 |
| maker-2-augustus-gene-313.67-mRNA-1 | Japonica | NA       |               |              |                          | Mediator of RNA polymerase II transcription subunit 23           |
| maker-2-augustus-gene-313.75-mRNA-1 | Japonica | Indica   |               | Os06g0257600 | OsR498G0204714400.01.T01 | GDLS esterase/lipase                                             |
| maker-2-augustus-gene-313.79-mRNA-1 | Japonica | NA       |               |              | OsR498G0204714800.01.T01 | Dynein light chain                                               |
| maker-2-augustus-gene-313.81-mRNA-1 | Japonica | NA       |               | Os02g0733400 | OsR498G0204716800.01.T01 |                                                                  |
| maker-2-augustus-gene-314.37-mRNA-1 | Japonica | NA       |               | Os02g0734300 | OsR498G0204719900.01.T01 | Nudix hydrolase 17 mitochondrial                                 |
| maker-2-augustus-gene-314.39-mRNA-1 | Japonica | Indica   |               | Os02g0734400 | OsR498G0204720300.01.T01 | probable peroxygenase 5                                          |
| maker-2-augustus-gene-314.42-mRNA-1 | Japonica | Indica   |               | Os02g0734400 | OsR498G0204720700.01.T01 | Caleosin                                                         |
| maker-2-augustus-gene-314.45-mRNA-1 | Japonica | NA       |               | Os02g0734600 | OsR498G0204720900.01.T01 | Peroxygenase                                                     |
| maker-2-augustus-gene-314.50-mRNA-1 | Japonica | NA       |               |              |                          | TPR repeat-containing protein YfgC                               |
| maker-2-augustus-gene-314.52-mRNA-1 | Japonica | NA       |               | Os02g0735100 | OsR498G0204723300.01.T01 | Mitochondrial metalloendopeptidase OMA1                          |
| maker-2-augustus-gene-314.54-mRNA-1 | Japonica | NA       |               | Os02g0735700 | OsR498G0204725300.01.T01 | Ankyrin repeat                                                   |
| maker-2-augustus-gene-314.57-mRNA-1 | Japonica | NA       |               | Os02g0735200 | OsR498G0204723800.01.T02 | Glutamine synthetase cytosolic isozyme 2                         |
| maker-2-augustus-gene-314.63-mRNA-1 | Japonica | NA       |               |              | OsR498G0204725800.01.T03 | E3 ubiquitin-protein ligase At4g11680 family                     |
| maker-2-augustus-gene-315.0-mRNA-1  | Japonica | NA       |               | Os02g0736100 | OsR498G0204726900.01.T01 | Microtubule-associated protein like                              |
| maker-2-augustus-gene-315.10-mRNA-1 | Japonica | NA       |               | Os02g0736300 | OsR498G0204727600.01.T01 | MACPF domain-containing protein (Fragment)                       |
| maker-2-augustus-gene-315.14-mRNA-1 | Japonica | NA       |               | Os02g0736400 | OsR498G0204727800.01.T02 | Pyrimidine 1 isoform 1                                           |
| maker-2-augustus-gene-315.18-mRNA-1 | Japonica | NA       |               | Os02g0736500 | OsR498G0204728000.01.T03 | Nicastrin                                                        |
| maker-2-augustus-gene-315.24-mRNA-1 | Japonica | NA       |               | Os02g0736700 |                          |                                                                  |
| maker-2-augustus-gene-315.6-mRNA-1  | Japonica | NA       |               | Os02g0736600 | OsR498G0204728100.01.T03 | RNA helicase                                                     |
| maker-2-augustus-gene-316.0-mRNA-1  | Japonica | NA       |               |              |                          |                                                                  |
| maker-2-augustus-gene-316.14-mRNA-1 | Japonica | NA       |               | Os02g0738900 | OsR498G0204736200.01.T01 | Dynamin GTPase                                                   |
| maker-2-augustus-gene-316.2-mRNA-1  | Japonica | NA       |               |              | OsR498G0204733700.01.T01 | Histidine kinase                                                 |
| maker-2-augustus-gene-316.21-mRNA-1 | Japonica | Indica   |               | Os02g0739100 | OsR498G0204737000.01.T01 | Formin-like protein 16                                           |
| maker-2-augustus-gene-316.5-mRNA-1  | Japonica | NA       |               | Os02g0738600 | OsR498G0204735300.01.T01 | Endoglucanase                                                    |
| maker-2-augustus-gene-316.9-mRNA-1  | Japonica | NA       |               | Os02g0739000 | OsR498G0204736700.01.T01 | Increased size exclusion limit 2                                 |
| maker-2-augustus-gene-317.0-mRNA-1  | Japonica | NA       |               | Os02g0740500 | OsR498G0204743700.01.T01 |                                                                  |
| maker-2-augustus-gene-317.12-mRNA-1 | Japonica | NA       |               | Os02g0739700 | OsR498G0204741400.01.T01 | Transcription factor E2F7                                        |
| maker-2-augustus-gene-317.16-mRNA-1 | Japonica | Indica   |               | Os06g0244700 | OsR498G0204741800.01.T01 | Microtubule-associated protein TORTIFOLIA1                       |
| maker-2-augustus-gene-317.18-mRNA-1 | Japonica | NA       |               | Os02g0740300 | OsR498G0204743000.01.T01 | meiotic spindle formation protein mei-1 isoform X1               |
| maker-2-augustus-gene-317.2-mRNA-1  | Japonica | NA       |               | Os02g0741100 | OsR498G0204745100.01.T01 | Chaperone protein dnaJ 16                                        |
| maker-2-augustus-gene-317.22-mRNA-1 | Japonica | NA       |               | Os02g0740400 | OsR498G0204743200.01.T01 | GDLS esterase/lipase APG                                         |
| maker-2-augustus-gene-317.8-mRNA-1  | Japonica | NA       |               | Os02g0739600 | OsR498G0204741000.01.T01 | Pyruvate dehydrogenase E1 component subunit alpha, mitochondrial |
| maker-2-augustus-gene-318.24-mRNA-1 | Japonica | NA       |               | Os02g0741300 | OsR498G0204745700.01.T02 | alpha-1,2-Mannosidase                                            |
| maker-2-augustus-gene-318.28-mRNA-1 | Japonica | NA       |               | Os02g0742000 | OsR498G0204748300.01.T01 | BAH domain                                                       |
| maker-2-augustus-gene-318.30-mRNA-1 | Japonica | NA       |               |              | OsR498G0204746200.01.T01 | Nuclear-pore anchor                                              |

|                                     |          |          |              |              |                          |                                                                              |
|-------------------------------------|----------|----------|--------------|--------------|--------------------------|------------------------------------------------------------------------------|
| maker-2-augustus-gene-318.39-mRNA-1 | Japonica | NA       |              | Os02g0741700 | OsR498G0204746400.01.T01 |                                                                              |
| maker-2-augustus-gene-318.42-mRNA-1 | Japonica | NA       |              | Os02g0741800 | OsR498G0204747400.01.T02 | Nucleobase-ascorbate transporter 6                                           |
| maker-2-augustus-gene-318.47-mRNA-1 | Japonica | Japonica |              | Os02g0741900 | OsR498G0204747800.01.T01 | AD domain-containing protein (Fragment)                                      |
| maker-2-augustus-gene-318.49-mRNA-1 | Japonica | NA       |              | Os02g0742200 | OsR498G0204749000.01.T01 | Rac-like GTP-binding protein 3                                               |
| maker-2-augustus-gene-318.53-mRNA-1 | Japonica | Indica   |              | Os06g0234100 | OsR498G0204750000.01.T02 | Protease Do-like protein 9                                                   |
| maker-2-augustus-gene-319.34-mRNA-1 | Japonica | Indica   | CC-Kinase-TM | Os02g0743500 | OsR498G0204756500.01.T01 | Serine/threonine-protein kinase CTR1                                         |
| maker-2-augustus-gene-319.39-mRNA-1 | Japonica | NA       |              |              | OsR498G0204757300.01.T01 | Latex abundant protein 1                                                     |
| maker-2-augustus-gene-319.41-mRNA-1 | Japonica | NA       |              | Os02g0743700 | OsR498G0204757700.01.T01 | NEP1-interacting protein-like 2                                              |
| maker-2-augustus-gene-319.45-mRNA-1 | Japonica | NA       |              | Os02g0744000 | OsR498G0204758500.01.T02 | Photosynthetic NDH subunit of subcomplex B 4 chloroplastic                   |
| maker-2-augustus-gene-319.47-mRNA-1 | Japonica | NA       |              |              | OsR498G0204751200.01.T03 | p-loop containing nucleoside triphosphate hydrolase superfamily protein      |
| maker-2-augustus-gene-319.54-mRNA-1 | Japonica | NA       |              | Os02g0743400 | OsR498G0204755400.01.T01 | Auxin efflux carrier component                                               |
| maker-2-augustus-gene-319.56-mRNA-1 | Japonica | NA       |              |              |                          | Casparian strip membrane protein 4                                           |
| maker-2-augustus-gene-320.0-mRNA-1  | Japonica | NA       |              | Os02g0744100 | OsR498G0204759300.01.T01 | Methyltransferase-like protein 7A                                            |
| maker-2-augustus-gene-320.11-mRNA-1 | Japonica | NA       |              | Os02g0745100 | OsR498G0204764100.01.T01 | Aquaporin NIP2-1                                                             |
| maker-2-augustus-gene-320.14-mRNA-1 | Japonica | NA       |              |              | OsR498G0204765100.01.T01 | NAC domain class transcription factor                                        |
| maker-2-augustus-gene-320.16-mRNA-1 | Japonica | NA       |              | Os02g0745400 | OsR498G0204765300.01.T02 | Hexosyltransferase                                                           |
| maker-2-augustus-gene-320.18-mRNA-1 | Japonica | NA       |              | Os02g0745600 | OsR498G0204765700.01.T01 | DCD domain-containing protein (Fragment)                                     |
| maker-2-augustus-gene-320.21-mRNA-1 | Japonica | NA       |              | Os02g0745700 | OsR498G0204765900.01.T01 | Aldehyde oxygenase (deformylating)                                           |
| maker-2-augustus-gene-320.25-mRNA-1 | Japonica | NA       |              |              | OsR498G0204761200.01.T01 | Putative mannan synthase                                                     |
| maker-2-augustus-gene-320.3-mRNA-1  | Japonica | NA       |              | Os02g0744200 | OsR498G0204760300.01.T01 | Expansin                                                                     |
| maker-2-augustus-gene-320.32-mRNA-1 | Japonica | NA       |              | Os02g0744700 | OsR498G0204761600.01.T01 | Starch synthase, chloroplastic/amyloplastic                                  |
| maker-2-augustus-gene-320.37-mRNA-1 | Japonica | NA       |              |              | OsR498G0204762600.01.T01 | RWP-RK domain-containing protein                                             |
| maker-2-augustus-gene-320.39-mRNA-1 | Japonica | Indica   |              | Os02g0745000 | OsR498G0204763000.01.T01 | ATPase ARSA1 isoform A                                                       |
| maker-2-augustus-gene-320.5-mRNA-1  | Japonica | NA       |              |              | OsR498G0509807100.01.T01 | Putative LRR receptor-like serine/threonine-protein kinase IRK               |
| maker-2-augustus-gene-320.7-mRNA-1  | Japonica | NA       |              | Os02g0744501 |                          |                                                                              |
| maker-2-augustus-gene-320.9-mRNA-1  | Japonica | NA       |              | Os02g0744900 | OsR498G0204762300.01.T01 | Geranylgeranyl diphosphate reductase, chloroplastic                          |
| maker-2-augustus-gene-321.31-mRNA-1 | Japonica | NA       |              |              | OsR498G0204766300.01.T02 | Aldehyde oxygenase (deformylating)                                           |
| maker-2-augustus-gene-321.36-mRNA-1 | Japonica | NA       |              | Os02g0746000 | OsR498G0204766600.01.T03 | Cullin-3                                                                     |
| maker-2-augustus-gene-326.37-mRNA-1 | Japonica | NA       |              | Os06g0677700 | OsR498G0613174100.01.T01 | Cleavage and polyadenylation specificity factor like                         |
| maker-2-augustus-gene-331.52-mRNA-1 | Japonica | NA       |              | Os11g0205500 | OsR498G1119581200.01.T01 |                                                                              |
| maker-2-augustus-gene-332.28-mRNA-1 | Japonica | NA       |              |              |                          | Copper-transporting ATPase RAN1                                              |
| maker-2-augustus-gene-337.42-mRNA-1 | Japonica | NA       |              | Os02g0747500 | OsR498G0204772500.01.T03 |                                                                              |
| maker-2-augustus-gene-337.46-mRNA-1 | Japonica | NA       |              | Os02g0749000 | OsR498G0815725100.01.T05 | AAA domain-containing protein                                                |
| maker-2-augustus-gene-337.52-mRNA-1 | Japonica | NA       |              |              |                          | AP2-like ethylene-responsive transcription factor AIL6 isoform A             |
| maker-2-augustus-gene-337.57-mRNA-1 | Japonica | Indica   |              | Os06g0226500 | OsR498G0204774000.01.T01 | Transcription factor ILI5                                                    |
| maker-2-augustus-gene-337.59-mRNA-1 | Japonica | NA       |              | Os02g0748100 | OsR498G0204775600.01.T03 | RAD50-interacting protein 1 (Fragment)                                       |
| maker-2-augustus-gene-338.37-mRNA-1 | Japonica | NA       |              |              | OsR498G0204779500.01.T01 | AAA domain-containing protein (Fragment)                                     |
| maker-2-augustus-gene-338.42-mRNA-1 | Japonica | Indica   |              | Os02g0749300 | OsR498G0204780700.01.T01 | Shikimate kinase                                                             |
| maker-2-augustus-gene-338.47-mRNA-1 | Japonica | NA       |              |              | OsR498G0204783300.01.T01 | Tetrapeptide repeat (TPR)-like superfamily protein isoform 1                 |
| maker-2-augustus-gene-338.49-mRNA-1 | Japonica | NA       |              | Os02g0751100 |                          | Aspartic proteinase nepenthesin-1                                            |
| maker-2-augustus-gene-338.51-mRNA-1 | Japonica | NA       |              |              | OsR498G0204781600.01.T02 | Exocyst complex component Sec6                                               |
| maker-2-augustus-gene-338.59-mRNA-1 | Japonica | Indica   |              | Os01g0374600 | OsR498G0204782000.01.T01 | Laccase                                                                      |
| maker-2-augustus-gene-338.62-mRNA-1 | Japonica | NA       |              | Os02g0750500 | OsR498G0204783600.01.T01 | tRNA (Carboxymethyluridine(34)-5-O)-methyltransferase isoform X1             |
| maker-2-augustus-gene-338.64-mRNA-1 | Japonica | NA       |              |              |                          | Membrane-anchored ubiquitin-fold protein                                     |
| maker-2-augustus-gene-339.27-mRNA-1 | Japonica | NA       |              | Os02g0751300 | OsR498G0204786700.01.T01 | FLZ-type domain-containing protein (Fragment)                                |
| maker-2-augustus-gene-339.29-mRNA-1 | Japonica | NA       |              | Os02g0751600 | OsR498G0204787500.01.T01 | Peptidylprolyl isomerase                                                     |
| maker-2-augustus-gene-34.48-mRNA-1  | Japonica | Indica   |              | Os06g0681300 | OsR498G0203020500.01.T01 | CRIB domain-containing protein RIC1                                          |
| maker-2-augustus-gene-34.50-mRNA-1  | Japonica | NA       |              | Os02g0162200 | OsR498G0203020900.01.T01 | Phytoecyanin domain-containing protein                                       |
| maker-2-augustus-gene-34.52-mRNA-1  | Japonica | Japonica |              | Os02g0162400 | OsR498G0203021300.01.T01 | Phytoecyanin domain-containing protein                                       |
| maker-2-augustus-gene-34.56-mRNA-1  | Japonica | Indica   |              | Os02g0161800 | OsR498G0203019200.01.T02 | Peroxidase                                                                   |
| maker-2-augustus-gene-34.59-mRNA-1  | Japonica | NA       |              |              | OsR498G0203019800.01.T01 | N utilization substance B                                                    |
| maker-2-augustus-gene-34.63-mRNA-1  | Japonica | NA       |              |              |                          | Ribosomal protein S14                                                        |
| maker-2-augustus-gene-34.66-mRNA-1  | Japonica | NA       |              |              |                          | BEACH domain-containing protein lvsC                                         |
| maker-2-augustus-gene-344.16-mRNA-1 | Japonica | NA       | Kinase-TM    | Os06g0654500 | OsR498G0613085100.01.T01 | Concanavalin A-like lectin/glucanase domain, Serine/threonine-protein kinase |
| maker-2-augustus-gene-344.5-mRNA-1  | Japonica | Indica   |              | Os02g0178100 | OsR498G0613085400.01.T01 | COLE                                                                         |
| maker-2-augustus-gene-346.8-mRNA-1  | Japonica | NA       |              | Os06g0650800 | OsR498G0613073200.01.T01 | Magnesium transporter                                                        |
| maker-2-augustus-gene-35.30-mRNA-1  | Japonica | NA       |              | Os02g0164000 |                          |                                                                              |
| maker-2-augustus-gene-35.8-mRNA-1   | Japonica | NA       |              |              | OsR498G0203027300.01.T01 | Ubiquitinyl hydrolase 1                                                      |
| maker-2-augustus-gene-351.42-mRNA-1 | Japonica | NA       |              | Os11g0635500 | OsR498G0613042200.01.T01 | Premnaspirodien oxygenase                                                    |
| maker-2-augustus-gene-351.44-mRNA-1 | Japonica | NA       |              | Os11g0635500 | OsR498G0613042000.01.T01 | Cytochrome P450 family protein, expressed                                    |
| maker-2-augustus-gene-355.12-mRNA-1 | Japonica | NA       |              | Os02g0757900 | OsR498G0204807600.01.T02 | Polyadenylate-binding protein 3                                              |

|                                     |          |          |           |              |                          |                                                      |
|-------------------------------------|----------|----------|-----------|--------------|--------------------------|------------------------------------------------------|
| maker-2-augustus-gene-355.3-mRNA-1  | Japonica | NA       |           | Os02g0758000 | OsR498G0204807700.01.T01 | Small heat shock protein HSP                         |
| maker-2-augustus-gene-355.5-mRNA-1  | Japonica | NA       |           | Os02g0758100 | OsR498G0204807900.01.T04 | LMBR1 domain-containing protein A                    |
| maker-2-augustus-gene-356.41-mRNA-1 | Japonica | NA       |           | Os02g0759700 | OsR498G0204813300.01.T02 | F-box protein FBX14                                  |
| maker-2-augustus-gene-356.44-mRNA-1 | Japonica | NA       |           | Os02g0759900 | OsR498G0204814300.01.T01 | CAAD domain-containing protein                       |
| maker-2-augustus-gene-356.47-mRNA-1 | Japonica | NA       |           | Os02g0760200 | OsR498G0204815300.01.T05 | Rhomboid-like protease 5                             |
| maker-2-augustus-gene-356.52-mRNA-1 | Japonica | NA       |           | Os02g0761000 | OsR498G0204817100.01.T01 | MADS-box transcription factor 30                     |
| maker-2-augustus-gene-356.56-mRNA-1 | Japonica | NA       |           | Os02g0758800 | OsR498G0204809800.01.T01 | Phytocyanin domain-containing protein                |
| maker-2-augustus-gene-356.58-mRNA-1 | Japonica | Indica   |           | Os09g0468700 | OsR498G0204811000.01.T02 | Transcription factor bHLH96 isoform A                |
| maker-2-augustus-gene-356.62-mRNA-1 | Japonica | NA       |           |              | OsR498G0204814600.01.T03 | Glucose-6-phosphate isomerase isoform 1              |
| maker-2-augustus-gene-356.67-mRNA-1 | Japonica | NA       |           | Os02g0760300 | OsR498G0204815600.01.T01 | Peptidyl-prolyl cis-trans isomerase                  |
| maker-2-augustus-gene-356.70-mRNA-1 | Japonica | NA       |           |              | OsR498G0204815800.01.T03 | Stress response protein nhaX (Fragment)              |
| maker-2-augustus-gene-357.37-mRNA-1 | Japonica | NA       |           | Os02g0761100 | OsR498G0204817700.01.T01 | Peptidylprolyl isomerase                             |
| maker-2-augustus-gene-357.41-mRNA-1 | Japonica | NA       |           |              | OsR498G0204818700.01.T01 | S-ribosylhomocysteinase (LuxS)                       |
| maker-2-augustus-gene-357.48-mRNA-1 | Japonica | NA       |           | Os02g0762400 | OsR498G0204821100.01.T01 | Cyclin-dependent kinase inhibitor                    |
| maker-2-augustus-gene-357.50-mRNA-1 | Japonica | NA       |           | Os02g0761200 | OsR498G0204818000.01.T02 | Armadillo repeat-containing protein 6                |
| maker-2-augustus-gene-357.53-mRNA-1 | Japonica | NA       |           | Os02g0761600 | OsR498G0204819000.01.T01 | Dimethylallyl, adenosine tRNA methylthiotransferase  |
| maker-2-augustus-gene-357.58-mRNA-1 | Japonica | NA       |           |              | OsR498G0204819200.01.T06 | Methionine aminopeptidase                            |
| maker-2-augustus-gene-357.65-mRNA-1 | Japonica | NA       |           | Os02g0762200 | OsR498G0204820000.01.T01 | TIMELESS-interacting protein isoform X1              |
| maker-2-augustus-gene-357.67-mRNA-1 | Japonica | NA       |           | Os02g0762300 | OsR498G0204820200.01.T04 | Cytoplasmic tRNA 2-thiolation protein 1              |
| maker-2-augustus-gene-357.72-mRNA-1 | Japonica | NA       |           | Os02g0762600 | OsR498G0204822200.01.T01 |                                                      |
| maker-2-augustus-gene-357.73-mRNA-1 | Japonica | NA       |           | Os02g0762800 | OsR498G0204822400.01.T03 | Protein CHROMATIN REMODELING like                    |
| maker-2-augustus-gene-358.0-mRNA-1  | Japonica | NA       |           | Os02g0763000 | OsR498G0204823100.01.T02 | Cell number regulator 1                              |
| maker-2-augustus-gene-358.11-mRNA-1 | Japonica | NA       |           | Os02g0765600 | OsR498G0204827200.01.T01 | 1,4-alpha-D-glucan glucanohydrolase                  |
| maker-2-augustus-gene-358.13-mRNA-1 | Japonica | NA       |           | Os02g0764500 | OsR498G0204826000.01.T02 | Chlorophyll a-b binding protein, chloroplastic       |
| maker-2-augustus-gene-358.18-mRNA-1 | Japonica | NA       |           | Os02g0765600 | OsR498G0204827200.01.T01 | Alpha-amylase type B isozyme                         |
| maker-2-augustus-gene-358.2-mRNA-1  | Japonica | NA       |           | Os02g0763200 | OsR498G0204823700.01.T01 | Fucosyltransferase                                   |
| maker-2-augustus-gene-358.4-mRNA-1  | Japonica | NA       |           | Os02g0763900 | OsR498G0204824700.01.T02 | Fucosyltransferase                                   |
| maker-2-augustus-gene-358.7-mRNA-1  | Japonica | NA       |           | Os02g0764200 | OsR498G0204825300.01.T01 | Fucosyltransferase                                   |
| maker-2-augustus-gene-358.9-mRNA-1  | Japonica | Japonica |           | Os02g0764400 | OsR498G0204825700.01.T01 | Fucosyltransferase                                   |
| maker-2-augustus-gene-359.18-mRNA-1 | Japonica | NA       |           | Os02g0766700 | OsR498G0204829400.01.T01 | ABA responsive element binding factor 1              |
| maker-2-augustus-gene-359.2-mRNA-1  | Japonica | Indica   |           | Os02g0767100 | OsR498G0204831100.01.T02 | THO complex subunit 5 B                              |
| maker-2-augustus-gene-359.22-mRNA-1 | Japonica | NA       |           | Os02g0766900 | OsR498G0204830000.01.T01 | Mannan endo-1,4-beta-mannosidase                     |
| maker-2-augustus-gene-359.24-mRNA-1 | Japonica | Indica   |           | Os02g0767000 | OsR498G0204830200.01.T03 |                                                      |
| maker-2-augustus-gene-359.27-mRNA-1 | Japonica | NA       |           | Os02g0767200 | OsR498G0204831400.01.T01 | Triacylglycerol lipase-like 1                        |
| maker-2-augustus-gene-359.29-mRNA-1 | Japonica | NA       |           | Os02g0767300 | OsR498G0204832000.01.T01 | Flavonol synthase/flavanone 3-hydroxylase            |
| maker-2-augustus-gene-359.32-mRNA-1 | Japonica | NA       |           | Os02g0767500 | OsR498G0204832600.01.T01 | Mitochondrial phosphate transporter                  |
| maker-2-augustus-gene-359.6-mRNA-1  | Japonica | Indica   |           | Os02g0765800 | OsR498G0204827400.01.T01 | non-specific lipid-transfer protein-like 1           |
| maker-2-augustus-gene-359.7-mRNA-1  | Japonica | NA       |           | Os01g0357100 | OsR498G0204827600.01.T01 | Ferredoxin--nitrite reductase chloroplastic          |
| maker-2-augustus-gene-360.0-mRNA-1  | Japonica | Indica   |           | Os02g0768600 | OsR498G0204835900.01.T01 | Inorganic diphosphatase                              |
| maker-2-augustus-gene-360.12-mRNA-1 | Japonica | NA       |           | Os02g0768200 | OsR498G0204835200.01.T01 | Transmembrane emp24 domain-containing protein 10     |
| maker-2-augustus-gene-360.14-mRNA-1 | Japonica | NA       |           | Os02g0768300 | OsR498G0204835400.01.T01 |                                                      |
| maker-2-augustus-gene-360.16-mRNA-1 | Japonica | Indica   |           | Os02g0769200 | OsR498G0204839600.01.T03 | Erwinia induced protein 1                            |
| maker-2-augustus-gene-360.3-mRNA-1  | Japonica | NA       |           |              | OsR498G0204836900.01.T01 | Putative PHD-finger domain containing protein family |
| maker-2-augustus-gene-360.9-mRNA-1  | Japonica | Japonica |           | Os02g0768000 | OsR498G0204835000.01.T01 |                                                      |
| maker-2-augustus-gene-361.35-mRNA-1 | Japonica | NA       | Kinase-TM | Os02g0769700 | OsR498G0204841300.01.T04 | Mitogen-activated protein kinase kinase kinase 1     |
| maker-2-augustus-gene-361.36-mRNA-1 | Japonica | NA       |           |              | OsR498G0204841300.01.T01 | Mitogen-activated protein kinase kinase kinase       |
| maker-2-augustus-gene-361.43-mRNA-1 | Japonica | NA       | Kinase    |              | OsR498G0204841500.01.T02 | Mitogen-activated protein kinase kinase kinase       |
| maker-2-augustus-gene-361.49-mRNA-1 | Japonica | NA       |           | Os02g0770000 | OsR498G0204842000.01.T01 | Proteasome endopeptidase complex                     |
| maker-2-augustus-gene-361.55-mRNA-1 | Japonica | NA       |           | Os02g0770100 | OsR498G0204842400.01.T03 |                                                      |
| maker-2-augustus-gene-361.58-mRNA-1 | Japonica | NA       |           |              |                          | Separase                                             |
| maker-2-augustus-gene-361.63-mRNA-1 | Japonica | NA       |           | Os02g0770800 | OsR498G0204845000.01.T01 | Nitrate reductase                                    |
| maker-2-augustus-gene-361.65-mRNA-1 | Japonica | NA       |           | Os02g0771100 | OsR498G0204846000.01.T01 | Copl                                                 |
| maker-2-augustus-gene-361.71-mRNA-1 | Japonica | NA       |           | Os02g0771400 | OsR498G0204846400.01.T02 | probable tyrosine-protein phosphatase DSP4           |
| maker-2-augustus-gene-362.0-mRNA-1  | Japonica | NA       |           | Os02g0771600 | OsR498G0204848700.01.T01 | 1-aminocyclopropane-1-carboxylate oxidase            |
| maker-2-augustus-gene-362.13-mRNA-1 | Japonica | NA       |           | Os02g0772500 | OsR498G0204850900.01.T01 | siRNA-mediated silencing protein NRDE-2              |
| maker-2-augustus-gene-362.18-mRNA-1 | Japonica | NA       |           | Os02g0771700 | OsR498G0204849000.01.T01 | Glucan endo-1,3-beta-D-glucosidase                   |
| maker-2-augustus-gene-362.22-mRNA-1 | Japonica | NA       |           |              | OsR498G0204849400.01.T01 | (Rice Genome Annotation Project) expressed protein   |
| maker-2-augustus-gene-362.27-mRNA-1 | Japonica | NA       |           | Os02g0772600 | OsR498G0204851200.01.T01 |                                                      |
| maker-2-augustus-gene-362.4-mRNA-1  | Japonica | NA       |           |              | OsR498G0611830400.01.T01 | Transcription elongation factor SPT5                 |
| maker-2-augustus-gene-362.9-mRNA-1  | Japonica | Indica   |           | Os02g0772300 | OsR498G0204850500.01.T05 | N-alpha-acetyltransferase 40                         |
| maker-2-augustus-gene-363.0-mRNA-1  | Japonica | NA       |           | Os02g0773200 | OsR498G0204853500.01.T02 | Usp domain-containing protein                        |



|                                     |          |          |               |              |                          |                                                                                |
|-------------------------------------|----------|----------|---------------|--------------|--------------------------|--------------------------------------------------------------------------------|
| maker-2-augustus-gene-363.11-mRNA-1 | Japonica | NA       |               | Os02g0774700 | OsR498G0204856700.01.T02 | CobW C-terminal domain-containing protein                                      |
| maker-2-augustus-gene-363.14-mRNA-1 | Japonica | Indica   |               | Os02g0775100 | OsR498G0204857500.01.T01 | Metal tolerance protein 3                                                      |
| maker-2-augustus-gene-363.19-mRNA-1 | Japonica | NA       |               | Os02g0773300 | OsR498G0204853800.01.T02 | Bifunctional D-cysteine desulfhydrase/1-aminocyclopropane-1-carboxylate        |
| maker-2-augustus-gene-363.28-mRNA-1 | Japonica | Indica   |               | Os06g0207500 | OsR498G0204854800.01.T01 | Protein trichome birefringence like                                            |
| maker-2-augustus-gene-363.3-mRNA-1  | Japonica | NA       |               | Os02g0773400 | OsR498G0204853900.01.T01 | Cyclic nucleotide-gated ion channel                                            |
| maker-2-augustus-gene-363.30-mRNA-1 | Japonica | NA       |               | Os02g0774300 | OsR498G0204856200.01.T01 | Mitochondrial HSO70 2                                                          |
| maker-2-augustus-gene-363.35-mRNA-1 | Japonica | NA       |               | Os02g0774500 | OsR498G0204856400.01.T01 | 3-methyladenine DNA glycosidase                                                |
| maker-2-augustus-gene-363.38-mRNA-1 | Japonica | NA       |               |              | OsR498G0204856600.01.T01 | 3-methyladenine DNA glycosidase                                                |
| maker-2-augustus-gene-363.40-mRNA-1 | Japonica | Indica   |               | Os02g0774800 | OsR498G0204857000.01.T01 |                                                                                |
| maker-2-augustus-gene-363.43-mRNA-1 | Japonica | NA       |               | Os02g0775200 | OsR498G0204857800.01.T04 | Replication factor C subunit                                                   |
| maker-2-augustus-gene-363.47-mRNA-1 | Japonica | NA       |               |              | OsR498G0204858400.01.T02 | Kinesin-like protein KIN-7D, chloroplastic                                     |
| maker-2-augustus-gene-363.8-mRNA-1  | Japonica | NA       |               | Os02g0774100 | OsR498G0204855900.01.T01 | Thioredoxin-like 3-1 chloroplastic                                             |
| maker-2-augustus-gene-364.0-mRNA-1  | Japonica | NA       |               |              |                          | Telomere repeat-binding protein 6                                              |
| maker-2-augustus-gene-364.11-mRNA-1 | Japonica | NA       |               | Os02g0776600 |                          |                                                                                |
| maker-2-augustus-gene-364.12-mRNA-1 | Japonica | NA       |               | Os02g0776800 | OsR498G0204866800.01.T01 | Replication protein A subunit                                                  |
| maker-2-augustus-gene-364.14-mRNA-1 | Japonica | NA       |               | Os02g0776900 | OsR498G0204867400.01.T01 | Growth-regulating factor                                                       |
| maker-2-augustus-gene-364.3-mRNA-1  | Japonica | NA       |               | Os02g0775900 | OsR498G0204862800.01.T01 |                                                                                |
| maker-2-augustus-gene-364.5-mRNA-1  | Japonica | NA       |               |              | OsR498G0204863400.01.T01 |                                                                                |
| maker-2-augustus-gene-365.0-mRNA-1  | Japonica | Indica   | Kinase-LRR-TM | Os06g0203800 | OsR498G0204869500.01.T02 | LRR receptor-like serine/threonine-protein kinase ERECTA                       |
| maker-2-augustus-gene-365.13-mRNA-1 | Japonica | NA       |               | Os02g0777100 | OsR498G0204868200.01.T08 | UDENN domain-containing protein                                                |
| maker-2-augustus-gene-365.16-mRNA-1 | Japonica | Indica   | Kinase-TM     | Os06g0202900 | OsR498G0204870400.01.T01 | Mitogen-activated protein kinase kinase kinase                                 |
| maker-2-augustus-gene-365.18-mRNA-1 | Japonica | NA       |               |              |                          |                                                                                |
| maker-2-augustus-gene-365.6-mRNA-1  | Japonica | NA       |               |              | OsR498G0204870100.01.T02 | Opaque endosperm1                                                              |
| maker-2-augustus-gene-366.33-mRNA-1 | Japonica | NA       |               | Os02g0778200 | OsR498G0204872300.01.T05 | Isoleucyl-tRNA synthetase                                                      |
| maker-2-augustus-gene-366.37-mRNA-1 | Japonica | NA       |               | Os02g0778300 | OsR498G0204872500.01.T02 | Putative FRIGIDA interacting protein 1                                         |
| maker-2-augustus-gene-366.41-mRNA-1 | Japonica | NA       |               | Os02g0778400 | OsR498G0204872500.01.T06 | Adenylate kinase                                                               |
| maker-2-augustus-gene-366.45-mRNA-1 | Japonica | NA       |               | Os02g0778500 | OsR498G0204873100.01.T01 | Chalcone--flavonone isomerase                                                  |
| maker-2-augustus-gene-366.48-mRNA-1 | Japonica | NA       |               | Os02g0778600 | OsR498G0204873300.01.T01 | Endoglucanase                                                                  |
| maker-2-augustus-gene-366.50-mRNA-1 | Japonica | NA       |               |              | OsR498G0204873700.01.T01 | Myotubularin-related 2                                                         |
| maker-2-augustus-gene-366.52-mRNA-1 | Japonica | NA       |               | Os02g0779000 | OsR498G0204874500.01.T01 | Cucumisin isoform B                                                            |
| maker-2-augustus-gene-367.0-mRNA-1  | Japonica | NA       |               |              |                          | ARM repeat superfamily protein                                                 |
| maker-2-augustus-gene-367.1-mRNA-1  | Japonica | NA       |               | Os02g0780500 | OsR498G0204878300.01.T01 | ARM repeat superfamily protein                                                 |
| maker-2-augustus-gene-367.13-mRNA-1 | Japonica | Indica   |               | Os06g0199200 | OsR498G0204879100.01.T06 | Smr domain-containing protein (Fragment)                                       |
| maker-2-augustus-gene-367.17-mRNA-1 | Japonica | NA       |               |              |                          | mRNA (guanine-N(7)-)-methyltransferase                                         |
| maker-2-augustus-gene-367.21-mRNA-1 | Japonica | NA       |               | Os02g0780700 | OsR498G0204880100.01.T05 | Putative lipase/calmodulin-binding heat-shock protein                          |
| maker-2-augustus-gene-367.26-mRNA-1 | Japonica | Indica   |               | Os02g0781000 | OsR498G0204882100.01.T02 | Polygalacturonase                                                              |
| maker-2-augustus-gene-367.53-mRNA-1 | Japonica | NA       |               | Os02g0781400 | OsR498G0204884600.01.T02 | Chaperonin, chloroplastic                                                      |
| maker-2-augustus-gene-367.55-mRNA-1 | Japonica | NA       |               | Os02g0781700 | OsR498G0204885000.01.T02 | MADS box interactor-like                                                       |
| maker-2-augustus-gene-367.60-mRNA-1 | Japonica | Indica   |               | Os05g0482600 | OsR498G0204885400.01.T01 |                                                                                |
| maker-2-augustus-gene-368.22-mRNA-1 | Japonica | Japonica |               | Os02g0781900 | OsR498G0204886300.01.T01 |                                                                                |
| maker-2-augustus-gene-368.26-mRNA-1 | Japonica | Indica   |               | Os02g0782100 | OsR498G0204887100.01.T01 | NUC173 domain-containing protein                                               |
| maker-2-augustus-gene-368.33-mRNA-1 | Japonica | NA       |               | Os02g0782500 | OsR498G0204889900.01.T01 | 18. class III heat shock protein (Fragment)                                    |
| maker-2-augustus-gene-368.35-mRNA-1 | Japonica | Indica   |               | Os06g0195600 | OsR498G0204890700.01.T06 | SAC domain-containing protein                                                  |
| maker-2-augustus-gene-368.42-mRNA-1 | Japonica | NA       |               |              | OsR498G0204891500.01.T01 | Putative acetyltransferase A, auxiliary subunit, leucine-rich repeat domain, L |
| maker-2-augustus-gene-368.50-mRNA-1 | Japonica | Indica   |               | Os02g0782900 | OsR498G0204892100.01.T01 |                                                                                |
| maker-2-augustus-gene-368.52-mRNA-1 | Japonica | NA       |               | Os02g0782200 | OsR498G0204889400.01.T04 | NOT2/NOT3/NOT5 family protein, expressed                                       |
| maker-2-augustus-gene-368.59-mRNA-1 | Japonica | NA       |               |              | OsR498G0204889600.01.T01 | J domain-containing protein (Fragment)                                         |
| maker-2-augustus-gene-368.64-mRNA-1 | Japonica | NA       |               | Os02g0782700 | OsR498G0204891000.01.T02 | Ethylene-responsive transcription factor                                       |
| maker-2-augustus-gene-368.66-mRNA-1 | Japonica | NA       |               | Os02g0783000 | OsR498G0204892400.01.T01 | Pectinesterase                                                                 |
| maker-2-augustus-gene-369.38-mRNA-1 | Japonica | NA       |               |              | OsR498G0204896300.01.T01 |                                                                                |
| maker-2-augustus-gene-369.42-mRNA-1 | Japonica | NA       |               |              |                          | Lysine-ketoglutarate reductase/saccharopine dehydrogenase1                     |
| maker-2-augustus-gene-369.50-mRNA-1 | Japonica | NA       |               |              | OsR498G0204891500.01.T01 | Protein TONSOKU like                                                           |
| maker-2-augustus-gene-369.58-mRNA-1 | Japonica | Indica   |               | Os06g0192600 | OsR498G0204898000.01.T01 | 26S protease regulatory subunit 7 homolog A                                    |
| maker-2-augustus-gene-369.64-mRNA-1 | Japonica | NA       |               |              | OsR498G0204898200.01.T01 |                                                                                |
| maker-2-augustus-gene-370.21-mRNA-1 | Japonica | Indica   | Kinase-TM     | Os02g0786200 | OsR498G0204902300.01.T02 | Serine/threonine-protein kinase STY8 (Fragment)                                |
| maker-2-augustus-gene-370.25-mRNA-1 | Japonica | Japonica |               | Os02g0786300 | OsR498G0204903100.01.T01 | Transcription factor like                                                      |
| maker-2-augustus-gene-370.27-mRNA-1 | Japonica | NA       |               |              |                          | F-box domain-containing protein                                                |
| maker-2-augustus-gene-370.29-mRNA-1 | Japonica | Japonica |               | Os02g0787100 | OsR498G0204905700.01.T03 | DUF676 domain-containing protein                                               |
| maker-2-augustus-gene-370.35-mRNA-1 | Japonica | NA       |               |              |                          | Transposon protein, putative, Pong sub-class, expressed                        |
| maker-2-augustus-gene-370.4-mRNA-1  | Japonica | Japonica |               | Os02g0785900 | OsR498G0204901100.01.T03 | Anaphase-promoting complex subunit 4                                           |
| maker-2-augustus-gene-370.9-mRNA-1  | Japonica | NA       |               |              | OsR498G0204901500.01.T07 | Quinoprotein amine dehydrogenase isoform 1                                     |

|                                     |          |          |              |              |                          |                                                                   |
|-------------------------------------|----------|----------|--------------|--------------|--------------------------|-------------------------------------------------------------------|
| maker-2-augustus-gene-371.0-mRNA-1  | Japonica | NA       | CC-Kinase-TM | Os02g0787200 | OsR498G0204905900.01.T01 | Serine threonine kinase                                           |
| maker-2-augustus-gene-371.10-mRNA-1 | Japonica | NA       |              | Os02g0788400 | OsR498G0204910500.01.T01 | Eukaryotic translation initiation factor 3 subunit G              |
| maker-2-augustus-gene-371.12-mRNA-1 | Japonica | NA       |              | Os02g0787800 | OsR498G0204909000.01.T06 | Diacylglycerol kinase                                             |
| maker-2-augustus-gene-371.16-mRNA-1 | Japonica | NA       |              |              | OsR498G0204910200.01.T01 | Desumoylating isopeptidase 1                                      |
| maker-2-augustus-gene-371.18-mRNA-1 | Japonica | NA       |              | Os02g0788500 | OsR498G0204911000.01.T01 | F-box protein SKIP8                                               |
| maker-2-augustus-gene-371.2-mRNA-1  | Japonica | Indica   |              | Os02g0787500 | OsR498G0204907700.01.T03 | E3 ubiquitin-protein ligase                                       |
| maker-2-augustus-gene-371.20-mRNA-1 | Japonica | NA       |              | Os02g0788600 | OsR498G0204911800.01.T02 | Chaperone protein ClpB-like                                       |
| maker-2-augustus-gene-371.23-mRNA-1 | Japonica | NA       |              | Os02g0788800 | OsR498G0204912400.01.T06 | Amino acid transporter, transmembrane                             |
| maker-2-augustus-gene-371.5-mRNA-1  | Japonica | NA       |              | Os02g0787600 | OsR498G0204908700.01.T01 | Ionotropic glutamate receptor                                     |
| maker-2-augustus-gene-371.8-mRNA-1  | Japonica | Japonica |              | Os02g0788300 | OsR498G0204910500.01.T01 | Eukaryotic translation initiation factor 3 subunit G              |
| maker-2-augustus-gene-372.46-mRNA-1 | Japonica | NA       |              | Os02g0789600 | OsR498G0204913700.01.T01 | Vacuolar import and degradation protein VID27                     |
| maker-2-augustus-gene-372.50-mRNA-1 | Japonica | Japonica |              | Os02g0789700 | OsR498G0917982000.01.T01 | WW domain-containing protein                                      |
| maker-2-augustus-gene-372.51-mRNA-1 | Japonica | Indica   |              | Os02g0790500 | OsR498G0204915700.01.T01 | Alpha,alpha-trehalose-phosphate synthase 9                        |
| maker-2-augustus-gene-372.58-mRNA-1 | Japonica | NA       |              | Os02g0791300 | OsR498G0204917900.01.T02 | Transcription factor IBH1-like                                    |
| maker-2-augustus-gene-372.59-mRNA-1 | Japonica | NA       |              | Os02g0789100 | OsR498G0204913200.01.T03 | Cyclic nucleotide-binding domain-containing protein (Fragment)    |
| maker-2-augustus-gene-372.63-mRNA-1 | Japonica | NA       |              | Os02g0789400 | OsR498G0204913400.01.T03 | Serine/arginine-rich splicing factor 7                            |
| maker-2-augustus-gene-372.66-mRNA-1 | Japonica | Indica   |              | Os02g0791400 | OsR498G0204918400.01.T02 | Cytochrome c oxidase subunit                                      |
| maker-2-augustus-gene-373.1-mRNA-1  | Japonica | Indica   | CC-Kinase-TM | Os02g0791700 | OsR498G0204919500.01.T02 | Serine/threonine-protein kinase BLUS1                             |
| maker-2-augustus-gene-373.11-mRNA-1 | Japonica | NA       |              | Os02g0793300 | OsR498G0204924300.01.T05 | Nudix hydrolase 3                                                 |
| maker-2-augustus-gene-373.17-mRNA-1 | Japonica | NA       |              | Os02g0791800 | OsR498G0204919800.01.T01 | Autophagy-related protein 18b                                     |
| maker-2-augustus-gene-373.22-mRNA-1 | Japonica | NA       |              | Os02g0792900 | OsR498G0204923600.01.T01 | Serine incorporator 3                                             |
| maker-2-augustus-gene-373.25-mRNA-1 | Japonica | NA       |              | Os02g0793000 | OsR498G0204923800.01.T01 | Zinc finger CCH domain-containing protein 18                      |
| maker-2-augustus-gene-373.28-mRNA-1 | Japonica | Japonica |              | Os02g0793500 | OsR498G0204925200.01.T02 | Methyltransferase-like protein 16                                 |
| maker-2-augustus-gene-373.7-mRNA-1  | Japonica | NA       |              | Os02g0793100 | OsR498G0204924100.01.T01 | Protein TPLATE like                                               |
| maker-2-augustus-gene-374.36-mRNA-1 | Japonica | NA       |              | Os02g0793800 |                          | Homeobox protein cut-like                                         |
| maker-2-augustus-gene-374.39-mRNA-1 | Japonica | NA       |              |              | OsR498G0204926700.01.T02 | AUGMIN subunit 8                                                  |
| maker-2-augustus-gene-374.44-mRNA-1 | Japonica | NA       |              | Os02g0794500 | OsR498G0204928300.01.T01 | Carboxypeptidase                                                  |
| maker-2-augustus-gene-374.49-mRNA-1 | Japonica | Japonica |              | Os02g0795000 | OsR498G0204929900.01.T02 | Ubiquitin carboxyl-terminal hydrolase                             |
| maker-2-augustus-gene-374.57-mRNA-1 | Japonica | NA       |              | Os02g0795200 | OsR498G0204930100.01.T01 | Protein POLAR LOCALIZATION DURING ASYMMETRIC DIVISION AND REDISTR |
| maker-2-augustus-gene-374.59-mRNA-1 | Japonica | NA       |              | Os02g0793900 | OsR498G0204926200.01.T01 | Protein HEADING DATE REPRESSOR like                               |
| maker-2-augustus-gene-374.61-mRNA-1 | Japonica | NA       |              | Os02g0794000 | OsR498G0204926400.01.T01 | Putative RING zinc finger domain superfamily protein isoform 1    |
| maker-2-augustus-gene-374.63-mRNA-1 | Japonica | Indica   |              | Os02g0794400 | OsR498G0204927000.01.T02 | Translation initiation factor IF-3, chloroplastic                 |
| maker-2-augustus-gene-374.67-mRNA-1 | Japonica | Indica   |              | Os02g0794700 | OsR498G0204929000.01.T01 | Leucine aminopeptidase 2 chloroplastic                            |
| maker-2-augustus-gene-374.75-mRNA-1 | Japonica | Indica   |              | Os02g0794900 | OsR498G0204929400.01.T01 | Formin-like protein 7                                             |
| maker-2-augustus-gene-374.89-mRNA-1 | Japonica | NA       |              | Os02g0795300 | OsR498G0204930600.01.T01 | E3 ubiquitin-protein ligase CHFR                                  |
| maker-2-augustus-gene-374.94-mRNA-1 | Japonica | NA       |              | Os02g0795600 |                          | Neprosin domain-containing protein                                |
| maker-2-augustus-gene-375.33-mRNA-1 | Japonica | NA       |              |              | OsR498G0204932100.01.T02 | Transcription factor bHLH69                                       |
| maker-2-augustus-gene-375.35-mRNA-1 | Japonica | NA       |              | Os02g0795900 | OsR498G0204932400.01.T04 | DEAD-box ATP-dependent RNA helicase                               |
| maker-2-augustus-gene-375.39-mRNA-1 | Japonica | Japonica |              | Os02g0796400 | OsR498G0204934400.01.T01 | Pentatricopeptide repeat-containing protein                       |
| maker-2-augustus-gene-375.41-mRNA-1 | Japonica | NA       |              | Os02g0796500 | OsR498G0204934600.01.T03 | Two-component response regulator                                  |
| maker-2-augustus-gene-375.45-mRNA-1 | Japonica | NA       |              | Os02g0796600 | OsR498G0204936000.01.T01 | Protein kinase family protein / WD-40 repeat family protein       |
| maker-2-augustus-gene-375.49-mRNA-1 | Japonica | NA       |              |              | OsR498G0204936400.01.T02 | Putative serine/threonine-protein kinase CCRP1                    |
| maker-2-augustus-gene-375.54-mRNA-1 | Japonica | NA       |              |              | OsR498G0204936800.01.T01 |                                                                   |
| maker-2-augustus-gene-375.56-mRNA-1 | Japonica | NA       |              | Os02g0797100 | OsR498G0204937800.01.T01 | Ethylene-responsive transcription factor ERF003                   |
| maker-2-augustus-gene-376.34-mRNA-1 | Japonica | NA       |              | Os02g0797500 | OsR498G0204939300.01.T01 | Aspartate aminotransferase                                        |
| maker-2-augustus-gene-376.38-mRNA-1 | Japonica | NA       |              |              |                          |                                                                   |
| maker-2-augustus-gene-376.42-mRNA-1 | Japonica | NA       |              | Os02g0798200 | OsR498G0204940900.01.T06 | RING-H2 finger protein ATL80                                      |
| maker-2-augustus-gene-376.44-mRNA-1 | Japonica | NA       |              | Os02g0798700 | OsR498G0204943700.01.T03 | Neurochondrin                                                     |
| maker-2-augustus-gene-376.48-mRNA-1 | Japonica | NA       |              | Os02g0797400 | OsR498G0204939200.01.T04 | DNA helicase                                                      |
| maker-2-augustus-gene-376.53-mRNA-1 | Japonica | Indica   |              | Os02g0798600 | OsR498G0204943000.01.T01 | RING/U-box superfamily protein isoform 1                          |
| maker-2-augustus-gene-377.11-mRNA-1 | Japonica | NA       |              |              | OsR498G0204945000.01.T06 | Shugoshin-1                                                       |
| maker-2-augustus-gene-377.15-mRNA-1 | Japonica | NA       |              | Os02g0800100 | OsR498G0204949200.01.T01 | Proteasome maturation factor UMP                                  |
| maker-2-augustus-gene-377.4-mRNA-1  | Japonica | NA       |              | Os02g0799300 |                          | Plasma membrane fusion protein                                    |
| maker-2-augustus-gene-377.6-mRNA-1  | Japonica | NA       |              |              | OsR498G0204948900.01.T01 | Plastid transcriptionally active 17                               |
| maker-2-augustus-gene-378.41-mRNA-1 | Japonica | NA       |              | Os02g0802200 | OsR498G0204958300.01.T03 | Heparanase-like protein 3                                         |
| maker-2-augustus-gene-378.44-mRNA-1 | Japonica | Indica   |              | Os02g0802700 | OsR498G0204960500.01.T01 | Monogalactosyldiacylglycerol synthase                             |
| maker-2-augustus-gene-378.50-mRNA-1 | Japonica | NA       |              | Os02g0803200 | OsR498G0204961500.01.T01 | Cell wall protein RBR3 isoform X1                                 |
| maker-2-augustus-gene-378.53-mRNA-1 | Japonica | NA       |              |              | OsR498G0204961700.01.T01 | N-alpha-acetyltransferase 35, NatC auxiliary subunit like         |
| maker-2-augustus-gene-378.60-mRNA-1 | Japonica | NA       |              | Os02g0803300 | OsR498G0204962300.01.T01 | ENTH domain-containing protein (Fragment)                         |
| maker-2-augustus-gene-378.66-mRNA-1 | Japonica | Indica   |              | Os02g0803600 | OsR498G0204962700.01.T02 | Vesicle-associated membrane protein 713                           |
| maker-2-augustus-gene-378.68-mRNA-1 | Japonica | Indica   |              | Os08g0442300 | OsR498G0204959200.01.T02 | Calcineurin subunit B like                                        |

|                                     |          |          |           |              |                           |                                                                          |
|-------------------------------------|----------|----------|-----------|--------------|---------------------------|--------------------------------------------------------------------------|
| maker-2-augustus-gene-378.73-mRNA-1 | Japonica | NA       |           | Os02g0802500 | OsR498G0204959400.01.T01  | H(+)-exporting diphosphatase                                             |
| maker-2-augustus-gene-378.75-mRNA-1 | Japonica | Indica   |           | Os02g0803400 | OsR498G0204962600.01.T02  | Vacuolar protein sorting                                                 |
| maker-2-augustus-gene-378.77-mRNA-1 | Japonica | NA       |           | Os02g0803700 | OsR498G0204963000.01.T01  | 26S proteasome regulatory particle triple-A ATPase protein               |
| maker-2-augustus-gene-379.40-mRNA-1 | Japonica | NA       |           | Os02g0804300 | OsR498G0204964700.01.T03  | 18S rRNA (Guanine-N(7))-methyltransferase                                |
| maker-2-augustus-gene-379.44-mRNA-1 | Japonica | NA       |           | Os02g0804400 | OsR498G0204964900.01.T01  | Homoserine O-acetyltransferase                                           |
| maker-2-augustus-gene-379.46-mRNA-1 | Japonica | Indica   |           | Os06g0168600 | OsR498G0204965900.01.T02  | Ribonucleoside-diphosphate reductase                                     |
| maker-2-augustus-gene-379.48-mRNA-1 | Japonica | NA       |           | Os02g0805100 | OsR498G0204967300.01.T03  | Auxin-responsive protein                                                 |
| maker-2-augustus-gene-379.51-mRNA-1 | Japonica | NA       |           | Os02g0805200 | OsR498G0204967700.01.T01  | Proliferating cell nuclear antigen                                       |
| maker-2-augustus-gene-379.57-mRNA-1 | Japonica | NA       |           | Os02g0804500 | OsR498G0204965200.01.T01  | DnaJ-like 1, mitochondrial                                               |
| maker-2-augustus-gene-379.63-mRNA-1 | Japonica | NA       |           |              | OsR498G0204965600.01.T02  | Adenylyltransferase and sulfurtransferase MOCS3 1 Molybdopterin-synthase |
| maker-2-augustus-gene-379.68-mRNA-1 | Japonica | Indica   |           | Os02g0805000 | OsR498G0204966400.01.T04  | AP-1 complex subunit gamma                                               |
| maker-2-augustus-gene-379.76-mRNA-1 | Japonica | NA       |           |              | OsR498G0204968000.01.T04  | Transcription factor SPATULA                                             |
| maker-2-augustus-gene-379.81-mRNA-1 | Japonica | NA       |           | Os02g0805700 | OsR498G0204969200.01.T01  | Intermediate filament protein ifc-1                                      |
| maker-2-augustus-gene-379.84-mRNA-1 | Japonica | Japonica |           | Os02g0805800 | OsR498G0204969400.01.T03  | Protein kinase domain-containing protein (Fragment)                      |
| maker-2-augustus-gene-380.14-mRNA-1 | Japonica | NA       |           |              | OsR498G0204972300.01.T03  | GATA transcription factor                                                |
| maker-2-augustus-gene-380.16-mRNA-1 | Japonica | NA       |           | Os02g0806900 | OsR498G0204976100.01.T01  | Long chain base biosynthesis protein 1                                   |
| maker-2-augustus-gene-380.23-mRNA-1 | Japonica | NA       |           | Os02g0805900 | OsR498G0204969600.01.T01  | mRNA-decapping enzyme subunit like                                       |
| maker-2-augustus-gene-380.29-mRNA-1 | Japonica | NA       |           | Os02g0806500 | OsR498G0204973200.01.T01  | Glycosyltransferase family protein 2                                     |
| maker-2-augustus-gene-380.35-mRNA-1 | Japonica | NA       |           | Os02g0806600 | OsR498G0204973800.01.T01  | Clathrin interactor EPSIN like                                           |
| maker-2-augustus-gene-380.38-mRNA-1 | Japonica | NA       |           | Os02g0806700 | OsR498G0204974200.01.T01  | E3 ubiquitin-protein ligase WAV3                                         |
| maker-2-augustus-gene-380.40-mRNA-1 | Japonica | NA       | Kinase-TM | Os02g0807000 | OsR498G0204976400.01.T01  | Calcium-dependent protein kinase, isoform AK1                            |
| maker-2-augustus-gene-381.34-mRNA-1 | Japonica | Indica   |           | Os02g0807100 | OsR498G0204976700.01.T01  | glycogen synthase isoform X1                                             |
| maker-2-augustus-gene-381.38-mRNA-1 | Japonica | NA       |           |              |                           | zf-LSD1 domain-containing protein                                        |
| maker-2-augustus-gene-381.46-mRNA-1 | Japonica | NA       | Kinase-TM | Os02g0811200 | OsR498G0204979300.01.T01  | Wall-associated receptor kinase 3                                        |
| maker-2-augustus-gene-381.48-mRNA-1 | Japonica | NA       | Kinase-TM | Os02g0807200 |                           | Wall-associated receptor kinase 3                                        |
| maker-2-augustus-gene-381.49-mRNA-1 | Japonica | Indica   | Kinase-TM | Os02g0807800 | OsR498G0204977600.01.T01  | Wall-associated receptor kinase 3                                        |
| maker-2-augustus-gene-381.50-mRNA-1 | Japonica | Indica   | Kinase-TM | Os02g0811200 | OsR498G0204978800.01.T01  | Wall-associated receptor kinase 3                                        |
| maker-2-augustus-gene-382.26-mRNA-1 | Japonica | NA       |           | Os02g0809500 | OsR498G0204981900.01.T05  | Isocitrate dehydrogenase [NADP], mitochondrial                           |
| maker-2-augustus-gene-382.29-mRNA-1 | Japonica | NA       |           | Os02g0809800 | OsR498G0204983100.01.T01  | Phosphate transporter PHO1                                               |
| maker-2-augustus-gene-382.36-mRNA-1 | Japonica | NA       |           |              | OsR498G0204984700.01.T01  | Kinesin-like protein KIN-10A                                             |
| maker-2-augustus-gene-382.40-mRNA-1 | Japonica | NA       |           | Os02g0810300 | OsR498G0204985100.01.T02  | ABC transporter domain-containing protein (Fragment)                     |
| maker-2-augustus-gene-382.45-mRNA-1 | Japonica | NA       | Kinase    | Os02g0810400 | OsR498G0204985500.01.T01  | Diphthamide synthase                                                     |
| maker-2-augustus-gene-382.50-mRNA-1 | Japonica | Indica   |           | Os02g0810450 | OsR498G0204985700.01.T05  | Diphthamide synthase                                                     |
| maker-2-augustus-gene-382.55-mRNA-1 | Japonica | NA       |           | Os02g0810500 | OsR498G0204985900.01.T03  | Diphthamide synthase                                                     |
| maker-2-augustus-gene-382.60-mRNA-1 | Japonica | NA       |           | Os02g0810900 | OsR498G0204987500.01.T01  | NAC transcription factor                                                 |
| maker-2-augustus-gene-382.62-mRNA-1 | Japonica | NA       |           |              | OsR498G0204983600.01.T01  | Transducin/WD40 repeat-like superfamily protein, putative isoform 1      |
| maker-2-augustus-gene-382.65-mRNA-1 | Japonica | Indica   |           | Os07g0436000 | OsR498G0204983800.01.T01  | Ankyrin repeat domain-containing protein 13C-B                           |
| maker-2-augustus-gene-383.13-mRNA-1 | Japonica | NA       |           |              | OsR498G0204993700.01.T01  | F-box domain, Leucine-rich repeat domain, L domain-like protein          |
| maker-2-augustus-gene-383.15-mRNA-1 | Japonica | NA       |           |              |                           | Trimeric LpxA-like enzyme                                                |
| maker-2-augustus-gene-383.18-mRNA-1 | Japonica | NA       |           | Os02g0812500 | OsR498G0204994300.01.T01  | F-box domain-containing protein                                          |
| maker-2-augustus-gene-383.2-mRNA-1  | Japonica | Japonica |           | Os02g0811600 | OsR498G0204992300.01.T01  | Epimerase domain-containing protein (Fragment)                           |
| maker-2-augustus-gene-383.21-mRNA-1 | Japonica | NA       |           | Os02g0812600 | OsR498G0204994500.01.T01  | Phloem-specific lectin                                                   |
| maker-2-augustus-gene-383.22-mRNA-1 | Japonica | Japonica |           | Os02g0812600 | OsR498G0204994500.01.T01  | Phloem-specific lectin                                                   |
| maker-2-augustus-gene-383.29-mRNA-1 | Japonica | Indica   |           | Os02g0811101 | OsR498G0204990200.01.T03  | SAP-like protein BP-73                                                   |
| maker-2-augustus-gene-383.5-mRNA-1  | Japonica | NA       |           | Os02g0811800 | OsR498G0204992300.01.T01  | Epimerase domain-containing protein (Fragment)                           |
| maker-2-augustus-gene-383.6-mRNA-1  | Japonica | NA       |           | Os02g0812000 | OsR498G0204992500.01.T01  | Epimerase domain-containing protein (Fragment)                           |
| maker-2-augustus-gene-384.0-mRNA-1  | Japonica | NA       |           | Os02g0813133 |                           | F-box domain-containing protein                                          |
| maker-2-augustus-gene-384.1-mRNA-1  | Japonica | NA       |           | Os02g0813166 |                           | Phloem-specific lectin                                                   |
| maker-2-augustus-gene-384.10-mRNA-1 | Japonica | NA       |           | Os06g0595700 |                           | DDE Tnp4 domain-containing protein (Fragment)                            |
| maker-2-augustus-gene-384.18-mRNA-1 | Japonica | NA       |           | Os02g0813300 | OsR498G0204995500.01.T01  | Phloem-specific lectin                                                   |
| maker-2-augustus-gene-384.21-mRNA-1 | Japonica | NA       |           | Os02g0813500 | OsR498G0204995900.01.T07  | Cytosolic glutathione reductase                                          |
| maker-2-augustus-gene-384.27-mRNA-1 | Japonica | Japonica |           | Os02g0814300 | OsR498G0205000100.01.T03  | Cytochrome c domain-containing protein                                   |
| maker-2-augustus-gene-384.28-mRNA-1 | Japonica | Indica   |           | Os02g0814400 | OsR498G0205000100.01.T03  | Cytochrome c domain-containing protein                                   |
| maker-2-augustus-gene-384.35-mRNA-1 | Japonica | NA       |           | Os02g0814800 | OsR498G0205000900.01.T01  | GST C-terminal domain-containing protein (Fragment)                      |
| maker-2-augustus-gene-384.37-mRNA-1 | Japonica | Indica   |           | Os02g0815001 | OsR498G02050001300.01.T01 | Ribosomal protein L37                                                    |
| maker-2-augustus-gene-384.41-mRNA-1 | Japonica | NA       |           | Os02g0813800 | OsR498G0204997000.01.T03  | Transcriptional coregulator                                              |
| maker-2-augustus-gene-384.45-mRNA-1 | Japonica | NA       |           | Os02g0814000 | OsR498G0204998600.01.T03  | DUF862 domain-containing protein (Fragment)                              |
| maker-2-augustus-gene-384.47-mRNA-1 | Japonica | Indica   |           | Os02g0814100 | OsR498G0204998800.01.T03  | Phospholipid--sterol O-acyltransferase                                   |
| maker-2-augustus-gene-384.54-mRNA-1 | Japonica | NA       |           | Os02g0814200 | OsR498G0204999000.01.T01  | Aldehyde oxygenase (deformylating)                                       |
| maker-2-augustus-gene-384.57-mRNA-1 | Japonica | NA       |           |              |                           | HTH myb-type domain-containing protein                                   |
| maker-2-augustus-gene-384.61-mRNA-1 | Japonica | NA       |           | Os02g0814900 | OsR498G02050001200.01.T04 | Nicotinamide-nucleotide adenylyltransferase                              |

|                                     |          |          |           |              |                          |                                                                        |
|-------------------------------------|----------|----------|-----------|--------------|--------------------------|------------------------------------------------------------------------|
| maker-2-augustus-gene-385.0-mRNA-1  | Japonica | NA       |           | Os02g0815200 | OsR498G0205001700.01.T01 | 28 kDa ribonucleoprotein chloroplastic                                 |
| maker-2-augustus-gene-385.15-mRNA-1 | Japonica | NA       |           | Os02g0816300 | OsR498G0205005900.01.T07 | CLIP-associated protein isoform X1                                     |
| maker-2-augustus-gene-385.2-mRNA-1  | Japonica | NA       |           | Os02g0815400 | OsR498G0205002100.01.T03 | S-(hydroxymethyl)glutathione dehydrogenase                             |
| maker-2-augustus-gene-385.23-mRNA-1 | Japonica | NA       |           | Os02g0816400 | OsR498G0205006100.01.T04 | Phosphatidylinositol N-acetylglucosaminyltransferase subunit P-related |
| maker-2-augustus-gene-385.25-mRNA-1 | Japonica | NA       |           |              |                          | Tubulin-specific chaperone A                                           |
| maker-2-augustus-gene-385.38-mRNA-1 | Japonica | NA       | Kinase-TM | Os02g0815900 | OsR498G0205003400.01.T01 | Receptor-like serine/threonine-protein kinase ALE2 isoform A           |
| maker-2-augustus-gene-385.42-mRNA-1 | Japonica | NA       |           | Os02g0816100 | OsR498G0205004200.01.T01 | Catalytic/ hydrolase/ phosphoglycolate phosphatase                     |
| maker-2-augustus-gene-385.45-mRNA-1 | Japonica | NA       |           | Os02g0816200 | OsR498G0205004600.01.T01 | Gdsl esterase lipase                                                   |
| maker-2-augustus-gene-385.47-mRNA-1 | Japonica | NA       | Kinase-TM |              | OsR498G0205006800.01.T01 | AarF domain-containing kinase                                          |
| maker-2-augustus-gene-385.54-mRNA-1 | Japonica | NA       |           | Os02g0816700 | OsR498G0205007000.01.T01 | Transmembrane protein, putative                                        |
| maker-2-augustus-gene-385.6-mRNA-1  | Japonica | NA       |           | Os02g0815500 | OsR498G0205002300.01.T01 | S-(hydroxymethyl)glutathione dehydrogenase                             |
| maker-2-augustus-gene-386.0-mRNA-1  | Japonica | NA       |           | Os02g0816900 | OsR498G0205007700.01.T03 | Dilute domain-containing protein                                       |
| maker-2-augustus-gene-386.10-mRNA-1 | Japonica | NA       |           | Os02g0817500 | OsR498G0205009300.01.T01 | Voltage-gated potassium channel beta subunit                           |
| maker-2-augustus-gene-386.13-mRNA-1 | Japonica | Indica   |           | Os02g0818000 | OsR498G0205010700.01.T05 | CBS domain-containing protein CBSX1, chloroplastic                     |
| maker-2-augustus-gene-386.18-mRNA-1 | Japonica | NA       |           | Os02g0817200 | OsR498G0205009000.01.T02 | Actin-related protein 2/3 complex subunit                              |
| maker-2-augustus-gene-386.23-mRNA-1 | Japonica | NA       |           | Os02g0817600 | OsR498G0205010000.01.T02 | Auxin-responsive protein IAA10                                         |
| maker-2-augustus-gene-386.32-mRNA-1 | Japonica | Indica   |           | Os02g0817800 | OsR498G0205010400.01.T03 | Initiator binding protein1                                             |
| maker-2-augustus-gene-386.37-mRNA-1 | Japonica | NA       |           | Os02g0817900 | OsR498G0205010600.01.T01 | protein LUTEIN DEFICIENT 5, chloroplastic                              |
| maker-2-augustus-gene-386.9-mRNA-1  | Japonica | NA       |           |              |                          |                                                                        |
| maker-2-augustus-gene-387.0-mRNA-1  | Japonica | Japonica |           | Os02g0818900 | OsR498G0205012900.01.T01 | Flagellar motor switch phosphatase FliY                                |
| maker-2-augustus-gene-387.11-mRNA-1 | Japonica | NA       |           |              | OsR498G0205016300.01.T01 | Pumilio-like protein 4                                                 |
| maker-2-augustus-gene-387.17-mRNA-1 | Japonica | NA       |           |              | OsR498G0205012400.01.T02 | Protein N-lysine methyltransferase                                     |
| maker-2-augustus-gene-387.2-mRNA-1  | Japonica | Japonica |           | Os02g0819000 | OsR498G0205013100.01.T01 | HMA domain-containing protein                                          |
| maker-2-augustus-gene-387.22-mRNA-1 | Japonica | Indica   |           | Os02g0819400 | OsR498G0205016600.01.T01 | P-loop NTPase domain-containing protein LPA1                           |
| maker-2-augustus-gene-387.26-mRNA-1 | Japonica | Indica   |           | Os02g0819500 | OsR498G0205017400.01.T06 | OTU domain-containing protein (Fragment)                               |
| maker-2-augustus-gene-387.32-mRNA-1 | Japonica | NA       |           | Os02g0819700 | OsR498G0205019200.01.T01 | DNL-type domain-containing protein (Fragment)                          |
| maker-2-augustus-gene-387.34-mRNA-1 | Japonica | NA       |           | Os02g0820000 | OsR498G0205020200.01.T03 | Serine/threonine-protein phosphatase                                   |
| maker-2-augustus-gene-387.4-mRNA-1  | Japonica | NA       |           | Os02g0819100 | OsR498G0205015900.01.T06 | S-acyltransferase                                                      |
| maker-2-augustus-gene-387.9-mRNA-1  | Japonica | NA       |           | Os02g0819200 | OsR498G0205016100.01.T01 | Thioredoxin-like 3-2 chloroplastic                                     |
| maker-2-augustus-gene-388.0-mRNA-1  | Japonica | NA       |           | Os02g0820900 | OsR498G0205023300.01.T02 | Ethylene receptor                                                      |
| maker-2-augustus-gene-388.11-mRNA-1 | Japonica | NA       |           | Os02g0821900 | OsR498G0205025300.01.T02 | ATG8-interacting protein 1-like isoform X1                             |
| maker-2-augustus-gene-388.13-mRNA-1 | Japonica | NA       |           | Os02g0822000 | OsR498G0205025500.01.T03 | Hydroxyproline-rich glycoprotein family protein                        |
| maker-2-augustus-gene-388.16-mRNA-1 | Japonica | NA       |           | Os02g0822100 | OsR498G0205025700.01.T01 | Transporter arsB like                                                  |
| maker-2-augustus-gene-388.19-mRNA-1 | Japonica | NA       |           | Os02g0822200 | OsR498G0205026100.01.T05 | Ubiquitin carboxyl-terminal hydrolase                                  |
| maker-2-augustus-gene-388.2-mRNA-1  | Japonica | Indica   |           | Os02g0821500 | OsR498G0205024900.01.T01 | Protein DETOXIFICATION                                                 |
| maker-2-augustus-gene-388.24-mRNA-1 | Japonica | NA       |           |              | OsR498G0205026300.01.T02 | K Homology domain                                                      |
| maker-2-augustus-gene-388.29-mRNA-1 | Japonica | NA       |           | Os02g0822400 | OsR498G0205026500.01.T01 | NAC transcription factor                                               |
| maker-2-augustus-gene-388.32-mRNA-1 | Japonica | NA       |           | Os02g0820300 | OsR498G0205020800.01.T02 | Kinesin light chain 3                                                  |
| maker-2-augustus-gene-388.35-mRNA-1 | Japonica | NA       |           | Os02g0820500 | OsR498G0205021200.01.T01 | LOB domain-containing protein 16                                       |
| maker-2-augustus-gene-388.37-mRNA-1 | Japonica | NA       |           | Os02g0820600 | OsR498G0205021600.01.T01 | Nucleolar/coiled-body phosphoprotein                                   |
| maker-2-augustus-gene-388.4-mRNA-1  | Japonica | NA       |           |              | OsR498G0205025100.01.T01 | Mediator of RNA polymerase II transcription subunit 36a                |
| maker-2-augustus-gene-388.41-mRNA-1 | Japonica | Indica   |           | Os02g0821200 | OsR498G0205023600.01.T01 | 60S ribosomal protein l28                                              |
| maker-2-augustus-gene-388.45-mRNA-1 | Japonica | NA       | Kinase    | Os02g0821400 | OsR498G0205024600.01.T01 | Serine/threonine protein kinase                                        |
| maker-2-augustus-gene-388.47-mRNA-1 | Japonica | NA       |           | Os02g0822500 | OsR498G0205026800.01.T03 | Phosphatidylinositol 4-phosphate 5-kinase                              |
| maker-2-augustus-gene-389.0-mRNA-1  | Japonica | NA       | CC-Kinase |              | OsR498G0205028700.01.T03 | U-box domain-containing protein 33                                     |
| maker-2-augustus-gene-389.10-mRNA-1 | Japonica | NA       |           | Os02g0823100 | OsR498G0205029100.01.T01 | Plasma membrane intrinsic protein 1                                    |
| maker-2-augustus-gene-389.12-mRNA-1 | Japonica | Indica   |           | Os04g0166600 | OsR498G0205029500.01.T02 | Histone deacetylase complex subunit SAP30/SAP30-like                   |
| maker-2-augustus-gene-389.17-mRNA-1 | Japonica | NA       |           | Os02g0823300 | OsR498G0205030100.01.T02 | RING/U-box superfamily protein                                         |
| maker-2-augustus-gene-389.20-mRNA-1 | Japonica | NA       |           | Os02g0823400 | OsR498G0205030500.01.T01 | Caffeic acid O-methyltransferase                                       |
| maker-2-augustus-gene-389.23-mRNA-1 | Japonica | Japonica |           | Os02g0823800 | OsR498G0205031500.01.T03 |                                                                        |
| maker-2-augustus-gene-389.25-mRNA-1 | Japonica | NA       |           | Os02g0822600 | OsR498G0205027800.01.T01 | 50S ribosomal protein L9, chloroplastic                                |
| maker-2-augustus-gene-389.28-mRNA-1 | Japonica | NA       |           | Os02g0822800 | OsR498G0205028600.01.T02 | Acyl-CoA-binding domain-containing protein 4                           |
| maker-2-augustus-gene-389.33-mRNA-1 | Japonica | NA       |           | Os02g0823600 |                          | Translation initiation factor IF-2 like (Fragment)                     |
| maker-2-augustus-gene-389.35-mRNA-1 | Japonica | Indica   |           | Os10g0545500 | OsR498G0205031400.01.T01 | Xyloglucan endotransglucosylase/hydrolase                              |
| maker-2-augustus-gene-389.37-mRNA-1 | Japonica | Japonica |           | Os02g0824000 | OsR498G0205032200.01.T06 | Pentatricopeptide repeat-containing protein mitochondrial-like         |
| maker-2-augustus-gene-389.4-mRNA-1  | Japonica | NA       |           | Os02g0823000 | OsR498G0205028900.01.T06 | PA domain-containing protein                                           |
| maker-2-augustus-gene-389.40-mRNA-1 | Japonica | NA       |           | Os02g0824300 | OsR498G0205033400.01.T01 | AT-hook motif nuclear-localized protein (Fragment)                     |
| maker-2-augustus-gene-39.34-mRNA-1  | Japonica | NA       |           | Os02g0170100 | OsR498G0203054900.01.T01 | Glycine cleavage system H protein (Fragment)                           |
| maker-2-augustus-gene-39.37-mRNA-1  | Japonica | NA       |           | Os02g0171100 | OsR498G0203057100.01.T01 | Glyceraldehyde-3-phosphate dehydrogenase                               |
| maker-2-augustus-gene-39.43-mRNA-1  | Japonica | NA       |           | Os02g0170200 | OsR498G0203055200.01.T01 | Style cell-cycle inhibitor 1-A                                         |
| maker-2-augustus-gene-39.46-mRNA-1  | Japonica | NA       |           | Os02g0170300 | OsR498G0203055400.01.T01 | MADS-box protein ZMM17                                                 |

|                                      |          |          |               |              |                          |                                                                            |
|--------------------------------------|----------|----------|---------------|--------------|--------------------------|----------------------------------------------------------------------------|
| maker-2-augustus-gene-39.48-mRNA-1   | Japonica | NA       |               |              |                          | Transglycosylase SLT domain containing protein expressed                   |
| maker-2-augustus-gene-390.104-mRNA-1 | Japonica | Japonica |               | Os02g0826000 | OsR498G0205036400.01.T01 | F-box domain-containing protein                                            |
| maker-2-augustus-gene-390.106-mRNA-1 | Japonica | Indica   |               | Os02g0825100 | OsR498G0205036600.01.T01 | F-box domain-containing protein                                            |
| maker-2-augustus-gene-390.119-mRNA-1 | Japonica | NA       |               | Os02g0826100 | OsR498G0205036800.01.T02 | ATP-dependent RNA helicase pitchoune                                       |
| maker-2-augustus-gene-390.54-mRNA-1  | Japonica | Japonica |               | Os02g0824500 | OsR498G0408962200.01.T01 | Remorin                                                                    |
| maker-2-augustus-gene-390.56-mRNA-1  | Japonica | NA       |               | Os02g0824700 | OsR498G0205034100.01.T01 | V-type proton ATPase subunit F                                             |
| maker-2-augustus-gene-390.63-mRNA-1  | Japonica | NA       |               | Os02g0826200 | OsR498G0205037100.01.T01 | Methionine adenosyltransferase 2 subunit beta like                         |
| maker-2-augustus-gene-390.72-mRNA-1  | Japonica | Japonica |               | Os02g0824400 | OsR498G0205033600.01.T01 | mediator of RNA polymerase II transcription subunit 2-like                 |
| maker-2-augustus-gene-390.75-mRNA-1  | Japonica | NA       |               |              | OsR498G0205034000.01.T01 |                                                                            |
| maker-2-augustus-gene-390.79-mRNA-1  | Japonica | Indica   |               | Os02g0825100 | OsR498G0205034700.01.T02 | F-box domain-containing protein                                            |
| maker-2-augustus-gene-390.95-mRNA-1  | Japonica | NA       |               |              |                          | Transposon protein, putative, unclassified                                 |
| maker-2-augustus-gene-390.97-mRNA-1  | Japonica | NA       |               |              |                          | Signal peptide peptidase                                                   |
| maker-2-augustus-gene-391.0-mRNA-1   | Japonica | Indica   |               | Os10g0497800 | OsR498G0205041700.01.T05 | Prolyl 4-hydroxylase alpha subunit                                         |
| maker-2-augustus-gene-391.13-mRNA-1  | Japonica | NA       |               | Os02g0827300 | OsR498G0205042100.01.T01 | PSP domain-containing protein                                              |
| maker-2-augustus-gene-391.19-mRNA-1  | Japonica | NA       |               | Os02g0827400 | OsR498G0205042300.01.T01 | DUF789 domain-containing protein                                           |
| maker-2-augustus-gene-391.21-mRNA-1  | Japonica | NA       |               |              | OsR498G0205042500.01.T01 | SMP-LTD domain-containing protein                                          |
| maker-2-augustus-gene-391.24-mRNA-1  | Japonica | NA       |               |              |                          | HAT family dimerisation domain containing protein                          |
| maker-2-augustus-gene-391.26-mRNA-1  | Japonica | NA       |               |              | OsR498G0205038400.01.T03 | ABC transporter F family member 3                                          |
| maker-2-augustus-gene-391.32-mRNA-1  | Japonica | NA       | CC-LRR-TM     | Os02g0826600 | OsR498G0205039000.01.T01 | Plant intracellular Ras-group-related LRR protein 9                        |
| maker-2-augustus-gene-391.39-mRNA-1  | Japonica | NA       |               | Os02g0827600 | OsR498G0205042800.01.T02 | Alpha-galactosidase-like                                                   |
| maker-2-augustus-gene-391.42-mRNA-1  | Japonica | NA       |               |              | OsR498G0205043000.01.T04 | Pentatricopeptide repeat                                                   |
| maker-2-augustus-gene-391.43-mRNA-1  | Japonica | NA       |               | Os02g0827900 | OsR498G0205043000.01.T06 | Signal peptidase I                                                         |
| maker-2-augustus-gene-391.5-mRNA-1   | Japonica | NA       |               | Os02g0827200 | OsR498G0205041900.01.T02 | Sucrose transporter                                                        |
| maker-2-augustus-gene-391.54-mRNA-1  | Japonica | Indica   |               | Os02g0828100 | OsR498G0205043200.01.T01 | Vacuolar protein-sorting protein BRO1                                      |
| maker-2-augustus-gene-392.39-mRNA-1  | Japonica | NA       |               | Os02g0828900 | OsR498G0205045700.01.T01 | Transcription factor jumonji (JmjC) domain-containing protein              |
| maker-2-augustus-gene-392.45-mRNA-1  | Japonica | NA       |               | Os02g0829400 | OsR498G0205047300.01.T01 | AP-5 complex subunit beta-1                                                |
| maker-2-augustus-gene-392.47-mRNA-1  | Japonica | NA       |               | Os02g0829100 | OsR498G0205046800.01.T01 | Replication protein A subunit A                                            |
| maker-2-augustus-gene-392.52-mRNA-1  | Japonica | Indica   |               | Os02g0829200 | OsR498G0205047200.01.T02 | Calcium-dependent lipid-binding (CaLB domain) family protein isoform 2     |
| maker-2-augustus-gene-392.54-mRNA-1  | Japonica | NA       |               | Os02g0829500 | OsR498G0205047600.01.T04 | Zn-dependent hydrolase, including glyoxylase                               |
| maker-2-augustus-gene-392.59-mRNA-1  | Japonica | Japonica |               | Os02g0829600 | OsR498G0205047600.01.T01 | Zn-dependent hydrolases, including glyoxylases                             |
| maker-2-augustus-gene-392.62-mRNA-1  | Japonica | NA       |               |              | OsR498G0205047800.01.T05 | U-box domain-containing protein 62                                         |
| maker-2-augustus-gene-392.65-mRNA-1  | Japonica | NA       |               | Os02g0829900 | OsR498G0205049000.01.T01 | Matrilin, coiled-coil trimerization domain-containing protein              |
| maker-2-augustus-gene-392.67-mRNA-1  | Japonica | NA       |               | Os02g0830100 | OsR498G0205049200.01.T01 | Metallopeptidase, catalytic domain-containing protein                      |
| maker-2-augustus-gene-392.72-mRNA-1  | Japonica | Japonica |               | Os02g0830200 | OsR498G0204371000.01.T01 | Two-component response regulator ORR5                                      |
| maker-2-augustus-gene-392.74-mRNA-1  | Japonica | NA       |               |              | OsR498G0205049600.01.T01 | Response regulatory domain-containing protein                              |
| maker-2-augustus-gene-392.78-mRNA-1  | Japonica | NA       |               |              | OsR498G0205050000.01.T01 |                                                                            |
| maker-2-augustus-gene-392.80-mRNA-1  | Japonica | NA       | Kinase-LRR-TM |              | OsR498G0205050200.01.T01 | Inactive leucine-rich repeat receptor-like serine/threonine-protein kinase |
| maker-2-augustus-gene-393.0-mRNA-1   | Japonica | NA       |               |              | OsR498G0205050500.01.T02 | ARM repeat superfamily protein                                             |
| maker-2-augustus-gene-393.10-mRNA-1  | Japonica | NA       |               | Os02g0831500 | OsR498G0205052100.01.T02 | Sucrose synthase                                                           |
| maker-2-augustus-gene-393.15-mRNA-1  | Japonica | NA       |               | Os02g0832000 | OsR498G0205053100.01.T01 | Calcium-dependent/calmodulin-independent protein kinase                    |
| maker-2-augustus-gene-393.17-mRNA-1  | Japonica | NA       |               |              | OsR498G0205054100.01.T01 | 1,3-beta-glucan synthase                                                   |
| maker-2-augustus-gene-393.34-mRNA-1  | Japonica | NA       |               |              | OsR498G0205056100.01.T01 | Protein DETOXIFICATION                                                     |
| maker-2-augustus-gene-393.38-mRNA-1  | Japonica | Indica   |               | Os02g0833900 | OsR498G0205058300.01.T01 | Peroxidase                                                                 |
| maker-2-augustus-gene-393.41-mRNA-1  | Japonica | NA       |               | Os02g0834000 | OsR498G0205059100.01.T01 | Rac-like GTP-binding protein 6                                             |
| maker-2-augustus-gene-393.54-mRNA-1  | Japonica | NA       |               | Os02g0831200 | OsR498G0205051000.01.T01 | Large ribosomal RNA subunit accumulation protein YCED 1, chloroplastic     |
| maker-2-augustus-gene-393.56-mRNA-1  | Japonica | NA       |               | Os02g0831300 | OsR498G0205051200.01.T02 | Beta-catenin-like protein 1 isoform A                                      |
| maker-2-augustus-gene-393.60-mRNA-1  | Japonica | Indica   |               | Os02g0831400 | OsR498G0205051800.01.T01 | SKIP interacting protein 16                                                |
| maker-2-augustus-gene-393.63-mRNA-1  | Japonica | NA       |               |              |                          | Piwi domain-containing protein (Fragment)                                  |
| maker-2-augustus-gene-393.68-mRNA-1  | Japonica | NA       |               | Os02g0831700 |                          | Phospholipase A                                                            |
| maker-2-augustus-gene-393.7-mRNA-1   | Japonica | Indica   |               | Os02g0831100 | OsR498G0205050700.01.T01 | Zinc finger CCCH domain-containing protein 19                              |
| maker-2-augustus-gene-393.74-mRNA-1  | Japonica | NA       |               |              |                          | Alpha-13-mannosyl-glycoprotein 2-beta-N-acetylglucosaminyltransferase      |
| maker-2-augustus-gene-393.81-mRNA-1  | Japonica | NA       |               | Os02g0833400 | OsR498G0205056800.01.T01 | probable serine/threonine-protein kinase roco9                             |
| maker-2-augustus-gene-393.85-mRNA-1  | Japonica | NA       |               | Os02g0833600 | OsR498G0205057600.01.T01 | BZIP transcription factor                                                  |
| maker-2-augustus-gene-393.88-mRNA-1  | Japonica | NA       |               | Os02g0834300 | OsR498G0205060600.01.T01 | Ferredoxin-related                                                         |
| maker-2-augustus-gene-4.0-mRNA-1     | Japonica | NA       |               | Os02g0106700 | OsR498G0202818900.01.T04 | Zinc finger with UFM1-specific peptidase domain protein isoform X1         |
| maker-2-augustus-gene-4.13-mRNA-1    | Japonica | NA       |               |              | OsR498G0202820900.01.T02 | Diphosphomevalonate decarboxylase                                          |
| maker-2-augustus-gene-40.29-mRNA-1   | Japonica | NA       |               | Os02g0172800 | OsR498G0203062100.01.T01 | B box-type domain-containing protein                                       |
| maker-2-augustus-gene-40.31-mRNA-1   | Japonica | NA       |               |              | OsR498G0203064100.01.T02 | Carotene beta-ring hydroxylase                                             |
| maker-2-augustus-gene-40.39-mRNA-1   | Japonica | Indica   |               | Os06g0665100 | OsR498G0203065100.01.T04 | Haloacid dehalogenase-like hydrolase domain-containing protein 3           |
| maker-2-augustus-gene-40.41-mRNA-1   | Japonica | Indica   |               | Os02g0173700 | OsR498G0203065300.01.T01 | PUA domain-containing protein (Fragment)                                   |
| maker-2-augustus-gene-40.53-mRNA-1   | Japonica | NA       |               |              | OsR498G0203064000.01.T03 | Urease accessory protein UreD                                              |

|                                    |          |        |               |              |                          |                                                                             |
|------------------------------------|----------|--------|---------------|--------------|--------------------------|-----------------------------------------------------------------------------|
| maker-2-augustus-gene-40.59-mRNA-1 | Japonica | NA     |               | Os02g0173800 | OsR498G0203065800.01.T01 | ALA-interacting subunit                                                     |
| maker-2-augustus-gene-42.33-mRNA-1 | Japonica | NA     |               |              | OsR498G0203076200.01.T01 | Transmembrane protein 230                                                   |
| maker-2-augustus-gene-42.36-mRNA-1 | Japonica | NA     |               |              |                          | Calcium-transporting ATPase                                                 |
| maker-2-augustus-gene-42.44-mRNA-1 | Japonica | Indica |               | Os02g0176900 | OsR498G0203078800.01.T03 | Glucose-6-phosphate 1-epimerase                                             |
| maker-2-augustus-gene-43.30-mRNA-1 | Japonica | NA     |               | Os02g0177300 | OsR498G0203079900.01.T01 | Squamosa promoter-binding-like protein 5                                    |
| maker-2-augustus-gene-43.32-mRNA-1 | Japonica | NA     |               | Os02g0177600 | OsR498G0203081900.01.T03 | 4-coumarate coenzyme A ligase                                               |
| maker-2-augustus-gene-43.37-mRNA-1 | Japonica | NA     |               |              |                          | FGGY carbohydrate kinase domain-containing protein isoform X3               |
| maker-2-augustus-gene-43.43-mRNA-1 | Japonica | Indica |               | Os02g0178100 | OsR498G0203084300.01.T02 | COLE                                                                        |
| maker-2-augustus-gene-43.45-mRNA-1 | Japonica | NA     |               |              | OsR498G0203084500.01.T01 | FBD domain-containing protein (Fragment)                                    |
| maker-2-augustus-gene-43.47-mRNA-1 | Japonica | Indica |               | Os02g0178400 | OsR498G0203085500.01.T02 | Protein transport protein Sec61 subunit gamma                               |
| maker-2-augustus-gene-43.49-mRNA-1 | Japonica | NA     |               | Os02g0177400 | OsR498G0203080800.01.T02 |                                                                             |
| maker-2-augustus-gene-43.53-mRNA-1 | Japonica | NA     |               | Os02g0177500 | OsR498G0203081200.01.T01 | Sm protein F                                                                |
| maker-2-augustus-gene-43.58-mRNA-1 | Japonica | NA     |               | Os02g0177700 | OsR498G0203082200.01.T01 |                                                                             |
| maker-2-augustus-gene-43.60-mRNA-1 | Japonica | NA     |               | Os02g0177800 | OsR498G0203082600.01.T02 | Calmodulin-binding protein 60 B like                                        |
| maker-2-augustus-gene-43.67-mRNA-1 | Japonica | NA     | Kinase-TM     | Os02g0178000 | OsR498G0203083200.01.T03 | Non-specific serine/threonine protein kinase                                |
| maker-2-augustus-gene-43.74-mRNA-1 | Japonica | NA     |               | Os02g0178500 | OsR498G0203085800.01.T01 | Vacuolar import and degradation protein VID27                               |
| maker-2-augustus-gene-44.0-mRNA-1  | Japonica | NA     |               | Os02g0178700 | OsR498G0203086300.01.T01 | BHLH domain-containing protein                                              |
| maker-2-augustus-gene-44.15-mRNA-1 | Japonica | NA     |               | Os02g0178800 | OsR498G0203086600.01.T01 | Aldehyde oxygenase (deformylating)                                          |
| maker-2-augustus-gene-47.38-mRNA-1 | Japonica | NA     |               | Os02g0184400 | OsR498G0203107300.01.T02 | UDP-glucose-fructose-phosphate glucosyltransferase                          |
| maker-2-augustus-gene-49.64-mRNA-1 | Japonica | NA     |               |              |                          | Cinnamyl alcohol dehydrogenase                                              |
| maker-2-augustus-gene-49.65-mRNA-1 | Japonica | NA     |               |              | OsR498G0203120200.01.T04 | Cinnamoyl alcohol dehydrogenase                                             |
| maker-2-augustus-gene-5.10-mRNA-1  | Japonica | Indica |               | Os02g0109400 | OsR498G0202829400.01.T01 | Transcription factor jumonji (JmjC) domain-containing protein               |
| maker-2-augustus-gene-5.14-mRNA-1  | Japonica | NA     |               | Os02g0109800 | OsR498G0202831000.01.T01 | Putative nephrocystin-3                                                     |
| maker-2-augustus-gene-50.55-mRNA-1 | Japonica | Indica |               | Os02g0190000 | OsR498G0203130400.01.T02 | ABC transporter family protein isoform 1                                    |
| maker-2-augustus-gene-51.0-mRNA-1  | Japonica | NA     | Kinase-LRR-TM | Os02g0190500 | OsR498G0203132100.01.T01 | Protein STRUBBELIG-RECEPTOR FAMILY 8 isoform X1                             |
| maker-2-augustus-gene-51.10-mRNA-1 | Japonica | NA     |               | Os02g0190800 | OsR498G0203133000.01.T02 | Alpha/beta hydrolase domain-containing protein 17B (Fragment)               |
| maker-2-augustus-gene-51.14-mRNA-1 | Japonica | Indica |               | Os02g0190900 | OsR498G0203133400.01.T01 | Bioproteinsis of lysosome-related organelles complex 1 subunit 2            |
| maker-2-augustus-gene-51.16-mRNA-1 | Japonica | NA     |               | Os02g0191300 | OsR498G0203134400.01.T04 | Sodium-coupled neutral amino acid transporter 1                             |
| maker-2-augustus-gene-51.19-mRNA-1 | Japonica | Indica |               | Os10g0476600 | OsR498G0203135000.01.T02 | Serine/threonine-protein phosphatase 2A regulatory subunit B" subunit alpha |
| maker-2-augustus-gene-51.6-mRNA-1  | Japonica | NA     |               | Os02g0191500 | OsR498G0203134500.01.T01 | E3 ubiquitin-protein ligase CIP8                                            |
| maker-2-augustus-gene-51.8-mRNA-1  | Japonica | NA     |               | Os02g0190700 | OsR498G0203132800.01.T01 |                                                                             |
| maker-2-augustus-gene-52.31-mRNA-1 | Japonica | NA     |               |              | OsR498G0203138300.01.T01 | Methyl-CpG-binding domain-containing protein 9                              |
| maker-2-augustus-gene-52.34-mRNA-1 | Japonica | Indica |               | Os02g0192100 | OsR498G0203137600.01.T01 |                                                                             |
| maker-2-augustus-gene-52.36-mRNA-1 | Japonica | NA     |               | Os02g0192500 | OsR498G0203138600.01.T01 | Glucomannan 4-beta-mannosyltransferase                                      |
| maker-2-augustus-gene-53.28-mRNA-1 | Japonica | NA     |               | Os02g0193600 | OsR498G0203142300.01.T01 | Mitotic checkpoint serine/threonine-protein kinase BUB1                     |
| maker-2-augustus-gene-53.33-mRNA-1 | Japonica | NA     |               |              | OsR498G0203143700.01.T02 | SWI/SNF complex subunit SMARCC2                                             |
| maker-2-augustus-gene-53.38-mRNA-1 | Japonica | NA     |               | Os02g0194200 | OsR498G0203144300.01.T01 | Zinc finger CCH domain-containing protein 14                                |
| maker-2-augustus-gene-53.43-mRNA-1 | Japonica | NA     | Kinase-TM     | Os02g0194600 | OsR498G0203145700.01.T02 | Putative STRUBBELIG family receptor protein kinase                          |
| maker-2-augustus-gene-53.44-mRNA-1 | Japonica | NA     |               |              | OsR498G0203143200.01.T01 | SEC7 domain-containing protein                                              |
| maker-2-augustus-gene-53.49-mRNA-1 | Japonica | NA     |               | Os02g0194100 | OsR498G0203144000.01.T04 | Citrate synthase                                                            |
| maker-2-augustus-gene-53.57-mRNA-1 | Japonica | Indica |               | Os02g0194300 | OsR498G0203144600.01.T01 | Elongation factor Ts, mitochondrial                                         |
| maker-2-augustus-gene-53.60-mRNA-1 | Japonica | Indica | Kinase-LRR-TM | Os01g0917500 | OsR498G0203145000.01.T01 | Leucine-rich repeat receptor protein kinase EXS                             |
| maker-2-augustus-gene-53.61-mRNA-1 | Japonica | NA     |               | Os02g0194700 | OsR498G0203146000.01.T01 | Lipoxygenase                                                                |
| maker-2-augustus-gene-53.64-mRNA-1 | Japonica | NA     |               | Os02g0194800 | OsR498G0203146600.01.T03 | TBCC domain-containing protein 1                                            |
| maker-2-augustus-gene-54.42-mRNA-1 | Japonica | NA     |               | Os02g0195500 | OsR498G0203148300.01.T03 | AbfB domain-containing protein                                              |
| maker-2-augustus-gene-54.47-mRNA-1 | Japonica | NA     |               | Os02g0195800 | OsR498G0203148900.01.T01 | J domain-containing protein (Fragment)                                      |
| maker-2-augustus-gene-54.50-mRNA-1 | Japonica | NA     |               | Os02g0196000 | OsR498G0203149300.01.T02 | Zinc transporter like                                                       |
| maker-2-augustus-gene-54.56-mRNA-1 | Japonica | NA     |               | Os02g0195000 | OsR498G0203147400.01.T01 | Polygalacturonase inhibitor                                                 |
| maker-2-augustus-gene-54.58-mRNA-1 | Japonica | NA     |               |              | OsR498G0203147600.01.T06 | DnaJ protein P58IPK homolog A                                               |
| maker-2-augustus-gene-54.63-mRNA-1 | Japonica | NA     |               | Os02g0196100 |                          | Zinc finger protein WIP2                                                    |
| maker-2-augustus-gene-54.65-mRNA-1 | Japonica | Indica |               | Os02g0196300 | OsR498G0203150600.01.T02 | Outer envelope protein 80 chloroplastic                                     |
| maker-2-augustus-gene-55.58-mRNA-1 | Japonica | NA     |               | Os02g0196800 | OsR498G0203153000.01.T01 | Fumarylacetoacetase                                                         |
| maker-2-augustus-gene-55.62-mRNA-1 | Japonica | NA     |               | Os02g0196900 | OsR498G0203153400.01.T01 | 3-oxoacyl-acyl-carrier-protein synthase                                     |
| maker-2-augustus-gene-57.38-mRNA-1 | Japonica | NA     |               | Os02g0202200 | OsR498G0203173700.01.T01 | SPX domain-containing protein 2                                             |
| maker-2-augustus-gene-57.46-mRNA-1 | Japonica | NA     |               |              | OsR498G0203169000.01.T01 | SHSP domain-containing protein (Fragment)                                   |
| maker-2-augustus-gene-57.48-mRNA-1 | Japonica | Indica |               | Os06g0604500 | OsR498G0203171000.01.T03 | Calcium-binding mitochondrial carrier protein like                          |
| maker-2-augustus-gene-57.51-mRNA-1 | Japonica | NA     |               |              | OsR498G0203172400.01.T07 | DEAD-box ATP-dependent RNA helicase                                         |
| maker-2-augustus-gene-58.23-mRNA-1 | Japonica | NA     |               |              | OsR498G0203174000.01.T04 | Nuclear pore complex protein NUP205                                         |
| maker-2-augustus-gene-58.28-mRNA-1 | Japonica | Indica |               | Os06g0602600 | OsR498G0203174600.01.T01 | Alba domain-containing protein (Fragment)                                   |
| maker-2-augustus-gene-58.32-mRNA-1 | Japonica | NA     |               | Os02g0202600 | OsR498G0203175200.01.T01 | Binding                                                                     |
| maker-2-augustus-gene-58.37-mRNA-1 | Japonica | NA     |               | Os02g0202800 |                          | SWIM-type domain-containing protein                                         |

|                                    |          |          |               |              |                          |                                                                         |
|------------------------------------|----------|----------|---------------|--------------|--------------------------|-------------------------------------------------------------------------|
| maker-2-augustus-gene-58.39-mRNA-1 | Japonica | NA       |               | Os02g0202900 | OsR498G0203176000.01.T01 | Galactose oxidase/kelch repeat superfamily protein isoform 1            |
| maker-2-augustus-gene-58.40-mRNA-1 | Japonica | NA       |               | Os02g0203000 |                          | cAMP response element binding (CREB) protein                            |
| maker-2-augustus-gene-58.42-mRNA-1 | Japonica | NA       | CC-NBS-TM     | Os02g0203500 | OsR498G0203179000.01.T01 | NB-ARC domain-containing protein (Fragment)                             |
| maker-2-augustus-gene-58.45-mRNA-1 | Japonica | NA       |               | Os02g0203700 | OsR498G0203179800.01.T03 | TATA-binding protein-associated factor 2N                               |
| maker-2-augustus-gene-59.16-mRNA-1 | Japonica | NA       |               |              | OsR498G0203181300.01.T07 | Peptidylprolyl isomerase                                                |
| maker-2-augustus-gene-59.21-mRNA-1 | Japonica | NA       |               | Os02g0204400 | OsR498G0203181500.01.T01 | Photolyase/cryptochrome alpha/beta domain-containing protein            |
| maker-2-augustus-gene-59.25-mRNA-1 | Japonica | NA       |               |              | OsR498G0203181700.01.T08 | ENT domain-containing protein (Fragment)                                |
| maker-2-augustus-gene-59.29-mRNA-1 | Japonica | NA       |               | Os02g0204700 | OsR498G0203183800.01.T01 |                                                                         |
| maker-2-augustus-gene-6.35-mRNA-1  | Japonica | Indica   |               | Os01g0580100 | OsR498G0202834900.01.T01 | Mannosyltransferase                                                     |
| maker-2-augustus-gene-6.41-mRNA-1  | Japonica | NA       |               | Os02g0111700 | OsR498G0202835300.01.T01 | Ribosomal protein L37                                                   |
| maker-2-augustus-gene-6.44-mRNA-1  | Japonica | NA       | Kinase-TM     |              | OsR498G0202833400.01.T05 | Receptor-like serine/threonine-protein kinase NCRK                      |
| maker-2-augustus-gene-6.47-mRNA-1  | Japonica | NA       |               |              | OsR498G0202833800.01.T04 | Helicase protein MOM1                                                   |
| maker-2-augustus-gene-6.52-mRNA-1  | Japonica | Japonica | Kinase-TM     | Os02g0111600 | OsR498G0202835200.01.T02 | Wall-associated receptor kinase 5                                       |
| maker-2-augustus-gene-6.55-mRNA-1  | Japonica | Indica   |               | Os02g0112000 | OsR498G0202836400.01.T01 |                                                                         |
| maker-2-augustus-gene-60.0-mRNA-1  | Japonica | NA       |               | Os02g0205400 | OsR498G0203187500.01.T01 | serine-threonine kinase receptor-associated protein isoform X1          |
| maker-2-augustus-gene-60.15-mRNA-1 | Japonica | NA       |               | Os02g0205500 | OsR498G0203188000.01.T01 | Very-long-chain 3-oxoacyl-CoA synthase                                  |
| maker-2-augustus-gene-60.2-mRNA-1  | Japonica | NA       |               | Os02g0205000 | OsR498G0203186200.01.T01 | 50S ribosomal protein like                                              |
| maker-2-augustus-gene-60.6-mRNA-1  | Japonica | NA       |               | Os02g0205200 | OsR498G0203186600.01.T02 | Allergen Act d 3                                                        |
| maker-2-augustus-gene-60.9-mRNA-1  | Japonica | NA       |               | Os02g0205300 | OsR498G0203187400.01.T01 | 26S proteasome regulatory particle triple-A ATPase subunit6             |
| maker-2-augustus-gene-61.25-mRNA-1 | Japonica | Indica   |               | Os01g0647100 | OsR498G0203194900.01.T01 | ADP,ATP carrier protein (Fragment)                                      |
| maker-2-augustus-gene-61.34-mRNA-1 | Japonica | Indica   |               | Os01g0609300 | OsR498G0203195500.01.T02 | Pleiotropic drug resistance protein 7                                   |
| maker-2-augustus-gene-61.39-mRNA-1 | Japonica | Indica   |               | Os02g0208600 | OsR498G0203196500.01.T01 | SPOC domain / Transcription elongation factor S-II protein              |
| maker-2-augustus-gene-62.0-mRNA-1  | Japonica | NA       |               | Os02g0208900 | OsR498G0203199300.01.T05 | NSP (Nuclear shuttle protein)-interacting GTPase                        |
| maker-2-augustus-gene-62.14-mRNA-1 | Japonica | Indica   |               | Os06g0143900 | OsR498G0203199800.01.T03 | Coatomer subunit beta'                                                  |
| maker-2-augustus-gene-62.15-mRNA-1 | Japonica | Indica   |               | Os06g0143900 | OsR498G0203200200.01.T03 | Coatomer subunit beta'                                                  |
| maker-2-augustus-gene-62.42-mRNA-1 | Japonica | NA       |               |              |                          | SUN domain-containing protein                                           |
| maker-2-augustus-gene-62.44-mRNA-1 | Japonica | NA       |               | Os02g0209900 | OsR498G0203201200.01.T01 | Syntaxin-123                                                            |
| maker-2-augustus-gene-62.46-mRNA-1 | Japonica | NA       |               |              | OsR498G0203201800.01.T01 |                                                                         |
| maker-2-augustus-gene-62.5-mRNA-1  | Japonica | NA       | Kinase-LRR-TM | Os02g0210700 | OsR498G0203202700.01.T01 | Putative LRR receptor-like serine/threonine-protein kinase              |
| maker-2-augustus-gene-62.7-mRNA-1  | Japonica | NA       |               |              | OsR498G0203203100.01.T06 | UDP-Glycosyltransferase superfamily protein                             |
| maker-2-augustus-gene-63.11-mRNA-1 | Japonica | Japonica |               | Os02g0212600 | OsR498G0203211700.01.T06 | Kinesin-II 85 kDa subunit isoform X2                                    |
| maker-2-augustus-gene-63.14-mRNA-1 | Japonica | NA       | Kinase-LRR-TM | Os02g0211200 |                          | Putative LRR receptor-like serine/threonine-protein kinase              |
| maker-2-augustus-gene-63.16-mRNA-1 | Japonica | NA       | Kinase-LRR-TM | Os02g0211200 |                          | Putative LRR receptor-like serine/threonine-protein kinase              |
| maker-2-augustus-gene-63.3-mRNA-1  | Japonica | Japonica |               | Os02g0211100 | OsR498G0202823400.01.T01 |                                                                         |
| maker-2-augustus-gene-63.5-mRNA-1  | Japonica | NA       |               | Os02g0212400 |                          |                                                                         |
| maker-2-augustus-gene-63.7-mRNA-1  | Japonica | NA       |               | Os02g0212500 |                          |                                                                         |
| maker-2-augustus-gene-64.39-mRNA-1 | Japonica | NA       | Kinase        |              | OsR498G1120698300.01.T01 | Receptor-like serine/threonine-protein kinase                           |
| maker-2-augustus-gene-64.47-mRNA-1 | Japonica | NA       |               |              | OsR498G0203214000.01.T01 |                                                                         |
| maker-2-augustus-gene-65.36-mRNA-1 | Japonica | NA       |               | Os02g0214300 | OsR498G0203216700.01.T02 | Nuclear ribonuclease Z                                                  |
| maker-2-augustus-gene-65.39-mRNA-1 | Japonica | NA       |               | Os02g0214500 | OsR498G0203217100.01.T01 | NAC domain class transcription factor                                   |
| maker-2-augustus-gene-65.41-mRNA-1 | Japonica | NA       |               | Os02g0214900 | OsR498G0203218700.01.T02 | Histone deacetylase                                                     |
| maker-2-augustus-gene-65.48-mRNA-1 | Japonica | Japonica | Kinase-LRR-TM | Os02g0215500 | OsR498G0203219100.01.T01 | Putative LRR receptor-like serine/threonine-protein kinase              |
| maker-2-augustus-gene-65.50-mRNA-1 | Japonica | NA       | Kinase-LRR-TM |              | OsR498G0203220300.01.T01 | Putative LRR receptor-like serine/threonine-protein kinase              |
| maker-2-augustus-gene-65.52-mRNA-1 | Japonica | NA       | Kinase-LRR-TM | Os02g0215700 |                          | Putative LRR receptor-like serine/threonine-protein kinase              |
| maker-2-augustus-gene-65.54-mRNA-1 | Japonica | NA       |               | Os02g0214900 | OsR498G0203217600.01.T02 | Histone deacetylase                                                     |
| maker-2-augustus-gene-65.57-mRNA-1 | Japonica | NA       |               | Os02g0215000 |                          | p-loop containing nucleoside triphosphate hydrolase superfamily protein |
| maker-2-augustus-gene-66.45-mRNA-1 | Japonica | NA       |               | Os07g0658550 |                          |                                                                         |
| maker-2-augustus-gene-66.46-mRNA-1 | Japonica | Indica   |               | Os02g0217400 | OsR498G0203223700.01.T01 | Premnaspirodiene oxygenase                                              |
| maker-2-augustus-gene-66.48-mRNA-1 | Japonica | NA       |               | Os02g0217400 | OsR498G0203224500.01.T01 | Premnaspirodiene oxygenase                                              |
| maker-2-augustus-gene-66.50-mRNA-1 | Japonica | NA       |               | Os02g0217500 | OsR498G0203225100.01.T01 |                                                                         |
| maker-2-augustus-gene-66.54-mRNA-1 | Japonica | NA       |               |              |                          | 28S rRNA (Cytosine-C(5))-methyltransferase                              |
| maker-2-augustus-gene-66.58-mRNA-1 | Japonica | Japonica | Kinase-LRR-TM | Os02g0215700 | OsR498G0203219100.01.T01 | Putative LRR receptor-like serine/threonine-protein kinase              |
| maker-2-augustus-gene-66.69-mRNA-1 | Japonica | NA       |               | Os02g0217600 | OsR498G0203225400.01.T01 | Serine/threonine-protein phosphatase                                    |
| maker-2-augustus-gene-67.40-mRNA-1 | Japonica | NA       |               | Os02g0218200 | OsR498G0203226300.01.T06 | Aminopeptidase                                                          |
| maker-2-augustus-gene-67.47-mRNA-1 | Japonica | Indica   | CC-Kinase-TM  | Os02g0218600 | OsR498G0203227300.01.T01 | E3 ubiquitin ligase                                                     |
| maker-2-augustus-gene-67.52-mRNA-1 | Japonica | NA       |               | Os02g0219700 | OsR498G0203230900.01.T01 | Senescence-associated protein 5                                         |
| maker-2-augustus-gene-67.54-mRNA-1 | Japonica | NA       |               |              | OsR498G0203231500.01.T01 | Cytokinin dehydrogenase                                                 |
| maker-2-augustus-gene-67.56-mRNA-1 | Japonica | NA       |               |              | OsR498G0203232100.01.T01 | Cytokinin dehydrogenase                                                 |
| maker-2-augustus-gene-67.58-mRNA-1 | Japonica | NA       | CC-Kinase-TM  | Os02g0218400 | OsR498G0203227000.01.T01 | U-box domain-containing protein 52                                      |
| maker-2-augustus-gene-67.61-mRNA-1 | Japonica | Indica   |               | Os02g0219200 | OsR498G0203229800.01.T01 | Beta-galactosidase 9                                                    |
| maker-2-augustus-gene-67.69-mRNA-1 | Japonica | NA       |               | Os02g0219400 | OsR498G0203230600.01.T02 | GPI-anchor transamidase                                                 |

|                                    |          |          |               |              |                          |                                                                     |
|------------------------------------|----------|----------|---------------|--------------|--------------------------|---------------------------------------------------------------------|
| maker-2-augustus-gene-67.73-mRNA-1 | Japonica | NA       |               |              | OsR498G0203231200.01.T01 |                                                                     |
| maker-2-augustus-gene-68.0-mRNA-1  | Japonica | NA       |               | Os02g0220500 | OsR498G0203233300.01.T01 | Elongation factor 1-gamma                                           |
| maker-2-augustus-gene-68.1-mRNA-1  | Japonica | NA       |               | Os02g0220600 | OsR498G0203233300.01.T08 | Elongation factor 1-gamma                                           |
| maker-2-augustus-gene-68.14-mRNA-1 | Japonica | NA       |               | Os02g0220400 | OsR498G0203233000.01.T01 | GATA transcription factor 20                                        |
| maker-2-augustus-gene-68.16-mRNA-1 | Japonica | NA       | Kinase-TM     |              | OsR498G0203233800.01.T02 | (Rice Genome Annotation Project) MAP3K delta-1 protein kinase       |
| maker-2-augustus-gene-68.23-mRNA-1 | Japonica | Japonica |               | Os02g0221100 | OsR498G0203235600.01.T01 | BHLH domain-containing protein (Fragment)                           |
| maker-2-augustus-gene-69.29-mRNA-1 | Japonica | NA       |               |              | OsR498G0203237300.01.T03 | Glycolipid permease LtaA                                            |
| maker-2-augustus-gene-69.35-mRNA-1 | Japonica | NA       |               | Os02g0221800 | OsR498G0203237700.01.T02 | calumenin                                                           |
| maker-2-augustus-gene-69.46-mRNA-1 | Japonica | NA       |               | Os02g0221900 | OsR498G0203238000.01.T02 | Thromboxane-A synthase                                              |
| maker-2-augustus-gene-7.0-mRNA-1   | Japonica | NA       |               |              | OsR498G0202837900.01.T01 | Pathogenesis-related protein 5                                      |
| maker-2-augustus-gene-7.12-mRNA-1  | Japonica | NA       |               | Os02g0113800 | OsR498G0202840900.01.T02 | DUF1618 domain-containing protein (Fragment)                        |
| maker-2-augustus-gene-7.16-mRNA-1  | Japonica | NA       |               | Os02g0112900 | OsR498G0202838200.01.T01 | Gamma-aminobutyric acid transaminase                                |
| maker-2-augustus-gene-7.19-mRNA-1  | Japonica | Indica   |               | Os09g0120033 | OsR498G0202840400.01.T01 |                                                                     |
| maker-2-augustus-gene-7.21-mRNA-1  | Japonica | NA       |               |              | OsR498G0202841400.01.T01 | ATP-dependent helicase BRM                                          |
| maker-2-augustus-gene-7.3-mRNA-1   | Japonica | Japonica |               | Os02g0113200 | OsR498G0202839100.01.T01 | Obtusifoliol 14-alpha demethylase                                   |
| maker-2-augustus-gene-7.6-mRNA-1   | Japonica | NA       |               | Os02g0113300 | OsR498G0202839700.01.T01 | DUF1618 domain-containing protein (Fragment)                        |
| maker-2-augustus-gene-7.8-mRNA-1   | Japonica | Japonica |               | Os02g0113400 | OsR498G0202839900.01.T01 |                                                                     |
| maker-2-augustus-gene-70.0-mRNA-1  | Japonica | NA       | Kinase-LRR-TM |              | OsR498G0203239100.01.T01 | receptor-like protein kinase 5 isoform X1                           |
| maker-2-augustus-gene-70.2-mRNA-1  | Japonica | NA       | Kinase-LRR-TM |              | OsR498G0203240500.01.T01 | Serine/threonine protein kinase                                     |
| maker-2-augustus-gene-71.0-mRNA-1  | Japonica | Indica   |               | Os02g0224300 | OsR498G0203249500.01.T02 | Far upstream element-binding protein 1                              |
| maker-2-augustus-gene-71.12-mRNA-1 | Japonica | NA       |               | Os02g0224200 | OsR498G0203248800.01.T04 | Serine/threonine-protein phosphatase 2A 55 kDa regulatory subunit B |
| maker-2-augustus-gene-71.5-mRNA-1  | Japonica | NA       |               | Os02g0224400 |                          | Metallopeptidase M24 family protein isoform 1                       |
| maker-2-augustus-gene-71.7-mRNA-1  | Japonica | NA       |               | Os02g0224800 | OsR498G0203254500.01.T01 | Pollen-specific protein (Fragment)                                  |
| maker-2-augustus-gene-72.0-mRNA-1  | Japonica | NA       |               | Os09g0508900 | OsR498G0203254900.01.T01 | Peroxisomal nicotinamide adenine dinucleotide carrier               |
| maker-2-augustus-gene-72.10-mRNA-1 | Japonica | NA       |               | Os02g0226200 | OsR498G0203259700.01.T01 | Inorganic pyrophosphatase 2                                         |
| maker-2-augustus-gene-72.18-mRNA-1 | Japonica | NA       |               |              |                          | F-box family protein, putative, expressed                           |
| maker-2-augustus-gene-72.22-mRNA-1 | Japonica | Indica   |               | Os02g0225300 | OsR498G0203256200.01.T01 | ATPase, vacuolar ER assembly factor, Vma                            |
| maker-2-augustus-gene-72.25-mRNA-1 | Japonica | NA       |               | Os02g0226000 | OsR498G0203258800.01.T01 | Peroxisomal membrane protein PMP22                                  |
| maker-2-augustus-gene-74.39-mRNA-1 | Japonica | NA       | LRR-TM        | Os02g0230100 | OsR498G0203274700.01.T03 | Protein phosphatase 1 regulatory subunit pprA                       |
| maker-2-augustus-gene-74.45-mRNA-1 | Japonica | NA       |               | Os02g0228900 | OsR498G0203270600.01.T01 | Auxin-responsive protein IAA7                                       |
| maker-2-augustus-gene-74.47-mRNA-1 | Japonica | NA       |               | Os02g0229000 | OsR498G0203271400.01.T01 | 40S ribosomal protein S24                                           |
| maker-2-augustus-gene-74.50-mRNA-1 | Japonica | Japonica |               | Os02g0229600 | OsR498G0203272800.01.T05 | Kinesin motor domain-containing protein                             |
| maker-2-augustus-gene-74.59-mRNA-1 | Japonica | Indica   |               | Os02g0230000 | OsR498G0203274600.01.T03 |                                                                     |
| maker-2-augustus-gene-75.16-mRNA-1 | Japonica | NA       |               | Os02g0230300 | OsR498G0203275400.01.T01 | Meiosis 5                                                           |
| maker-2-augustus-gene-75.18-mRNA-1 | Japonica | NA       |               |              | OsR498G0203275800.01.T01 | BHLH domain-containing protein                                      |
| maker-2-augustus-gene-76.0-mRNA-1  | Japonica | NA       |               | Os02g0232000 | OsR498G0203284300.01.T01 | Heat stress transcription factor                                    |
| maker-2-augustus-gene-76.10-mRNA-1 | Japonica | NA       | Kinase-LRR-TM |              |                          | Mitogen-activated protein kinase kinase                             |
| maker-2-augustus-gene-76.17-mRNA-1 | Japonica | NA       |               |              | OsR498G0203282200.01.T01 | Phytoecyanin domain-containing protein                              |
| maker-2-augustus-gene-76.2-mRNA-1  | Japonica | Indica   |               | Os06g0157500 | OsR498G0203285700.01.T01 |                                                                     |
| maker-2-augustus-gene-76.20-mRNA-1 | Japonica | NA       | Kinase-LRR-TM | Os02g0231700 | OsR498G0203282600.01.T01 | Leucine-rich repeat protein kinase family protein                   |
| maker-2-augustus-gene-76.22-mRNA-1 | Japonica | NA       |               | Os02g0232100 | OsR498G0203284600.01.T02 | E3 ubiquitin-protein like                                           |
| maker-2-augustus-gene-76.25-mRNA-1 | Japonica | NA       |               | Os02g0232900 | OsR498G0203286800.01.T02 | Aquaporin NIP                                                       |
| maker-2-augustus-gene-76.4-mRNA-1  | Japonica | NA       |               | Os02g0232400 | OsR498G0203286100.01.T01 | Citrate synthase                                                    |
| maker-2-augustus-gene-77.25-mRNA-1 | Japonica | NA       |               | Os02g0233100 | OsR498G0203288500.01.T01 | FYVE-type domain-containing protein (Fragment)                      |
| maker-2-augustus-gene-77.29-mRNA-1 | Japonica | NA       |               | Os02g0234200 | OsR498G0203290500.01.T01 | Putative six-bladed beta-propeller, TolB                            |
| maker-2-augustus-gene-77.32-mRNA-1 | Japonica | Indica   |               | Os02g0233200 | OsR498G0203288800.01.T01 | BES1/BZR1 like protein 4                                            |
| maker-2-augustus-gene-77.36-mRNA-1 | Japonica | NA       |               |              |                          |                                                                     |
| maker-2-augustus-gene-77.38-mRNA-1 | Japonica | NA       |               |              |                          | TTF-type domain-containing protein                                  |
| maker-2-augustus-gene-78.18-mRNA-1 | Japonica | Indica   |               | Os02g0235900 | OsR498G0203297900.01.T01 | Berberine bridge enzyme-like protein 50                             |
| maker-2-augustus-gene-78.19-mRNA-1 | Japonica | NA       |               | Os02g0236000 | OsR498G0203299500.01.T02 | Aspartate aminotransferase                                          |
| maker-2-augustus-gene-78.24-mRNA-1 | Japonica | Japonica |               | Os02g0234700 | OsR498G0612730300.01.T02 |                                                                     |
| maker-2-augustus-gene-78.26-mRNA-1 | Japonica | NA       |               | Os02g0234800 | OsR498G0203293800.01.T01 | U2 small nuclear ribonucleoprotein A'                               |
| maker-2-augustus-gene-78.31-mRNA-1 | Japonica | NA       | Kinase-LRR-TM | Os02g0236100 | OsR498G0203300000.01.T02 | LRR receptor-like serine/threonine-protein kinase                   |
| maker-2-augustus-gene-78.5-mRNA-1  | Japonica | Indica   |               | Os02g0235000 | OsR498G0203294900.01.T05 | Actin-related protein 2/3 complex subunit                           |
| maker-2-augustus-gene-78.9-mRNA-1  | Japonica | NA       |               | Os02g0235600 | OsR498G0203297700.01.T04 | 60S ribosomal protein L11                                           |
| maker-2-augustus-gene-79.0-mRNA-1  | Japonica | Indica   |               | Os06g0547400 | OsR498G0203302100.01.T01 | Peroxidase                                                          |
| maker-2-augustus-gene-79.10-mRNA-1 | Japonica | NA       | Kinase-TM     | Os02g0236200 | OsR498G0203300400.01.T01 | Non-specific serine/threonine protein kinase                        |
| maker-2-augustus-gene-79.16-mRNA-1 | Japonica | NA       |               | Os02g0237100 | OsR498G0203303600.01.T03 | PABS domain-containing protein                                      |
| maker-2-augustus-gene-79.4-mRNA-1  | Japonica | NA       |               | Os02g0236800 | OsR498G0203302700.01.T02 | Peroxidase                                                          |
| maker-2-augustus-gene-79.8-mRNA-1  | Japonica | NA       |               | Os02g0237700 |                          | BED-type domain-containing protein (Fragment)                       |
| maker-2-augustus-gene-8.28-mRNA-1  | Japonica | NA       |               | Os02g0114700 | OsR498G0202843500.01.T01 | D-site 20S pre-rRNA nuclease Nob                                    |



|                                    |          |          |               |              |                          |                                                                             |
|------------------------------------|----------|----------|---------------|--------------|--------------------------|-----------------------------------------------------------------------------|
| maker-2-augustus-gene-8.31-mRNA-1  | Japonica | NA       |               | Os02g0115600 | OsR498G0202846700.01.T02 | S1 motif domain-containing protein (Fragment)                               |
| maker-2-augustus-gene-8.34-mRNA-1  | Japonica | NA       |               | Os02g0114050 | OsR498G0202842000.01.T01 |                                                                             |
| maker-2-augustus-gene-8.37-mRNA-1  | Japonica | NA       |               | Os02g0114200 | OsR498G0202842400.01.T01 | Carboxypeptidase                                                            |
| maker-2-augustus-gene-8.41-mRNA-1  | Japonica | NA       |               | Os02g0114400 | OsR498G0202842600.01.T01 | Glycerol-3-phosphate 2-O-acyltransferase 4                                  |
| maker-2-augustus-gene-8.43-mRNA-1  | Japonica | NA       |               | Os02g0114600 | OsR498G0202843000.01.T02 | F-box/kelch-repeat protein SKIP4                                            |
| maker-2-augustus-gene-8.45-mRNA-1  | Japonica | NA       |               | Os02g0114800 | OsR498G0202843800.01.T01 | transcription repressor MYB6                                                |
| maker-2-augustus-gene-8.47-mRNA-1  | Japonica | Japonica |               | Os02g0115700 | OsR498G0305175000.01.T01 | Catalase isozyme A                                                          |
| maker-2-augustus-gene-80.23-mRNA-1 | Japonica | NA       |               | Os08g0487300 | OsR498G0816350400.01.T01 | Transposon protein, putative, Mutator sub-class                             |
| maker-2-augustus-gene-80.26-mRNA-1 | Japonica | NA       |               | Os04g0599400 | OsR498G0203306400.01.T02 | Phospholipid scramblase                                                     |
| maker-2-augustus-gene-81.0-mRNA-1  | Japonica | NA       |               | Os02g0240100 | OsR498G0203308300.01.T01 | Peroxidase                                                                  |
| maker-2-augustus-gene-81.15-mRNA-1 | Japonica | NA       | Kinase-LRR-TM | Os02g0241100 | OsR498G0203310000.01.T01 | Serine/threonine protein kinase                                             |
| maker-2-augustus-gene-81.2-mRNA-1  | Japonica | NA       |               | Os02g0240300 | OsR498G0203308700.01.T01 | Peroxidase                                                                  |
| maker-2-augustus-gene-81.4-mRNA-1  | Japonica | Japonica |               | Os02g0240500 | OsR498G0203309700.01.T01 | Peroxidase                                                                  |
| maker-2-augustus-gene-81.6-mRNA-1  | Japonica | NA       |               |              | OsR498G0203310700.01.T01 | HTH myb-type domain-containing protein                                      |
| maker-2-augustus-gene-81.8-mRNA-1  | Japonica | NA       | Kinase-TM     | Os02g0241600 | OsR498G0203312300.01.T01 | Serine/threonine-protein kinase EDR1                                        |
| maker-2-augustus-gene-82.0-mRNA-1  | Japonica | NA       |               | Os02g0242600 | OsR498G0203314300.01.T01 | Glutelin type-B                                                             |
| maker-2-augustus-gene-82.2-mRNA-1  | Japonica | Japonica |               | Os02g0243900 | OsR498G0203315300.01.T01 | Potassium channel KAT1                                                      |
| maker-2-augustus-gene-83.14-mRNA-1 | Japonica | NA       |               | Os02g0244100 | OsR498G0203315700.01.T02 | RING-type E3 ubiquitin ligase                                               |
| maker-2-augustus-gene-83.18-mRNA-1 | Japonica | NA       |               | Os02g0244300 | OsR498G0203317100.01.T01 | Ubiquitin carboxyl-terminal hydrolase 15                                    |
| maker-2-augustus-gene-83.24-mRNA-1 | Japonica | NA       |               | Os02g0245000 | OsR498G0203319700.01.T05 | Splicing factor 3A subunit 1                                                |
| maker-2-augustus-gene-83.26-mRNA-1 | Japonica | NA       |               | Os02g0244700 | OsR498G0203318800.01.T02 | Phosphoenolpyruvate carboxylase                                             |
| maker-2-augustus-gene-84.0-mRNA-1  | Japonica | NA       |               |              | OsR498G0203324700.01.T02 | 1,3-beta-glucan synthase                                                    |
| maker-2-augustus-gene-84.2-mRNA-1  | Japonica | NA       |               |              |                          | 1,3-beta-glucan synthase                                                    |
| maker-2-augustus-gene-84.6-mRNA-1  | Japonica | Indica   |               | Os02g0245800 | OsR498G0203322200.01.T03 | Potassium channel KAT1                                                      |
| maker-2-augustus-gene-85.43-mRNA-1 | Japonica | NA       |               | Os02g0247100 | OsR498G0203325700.01.T01 | Basic-leucine zipper domain                                                 |
| maker-2-augustus-gene-85.45-mRNA-1 | Japonica | Indica   |               | Os01g0212400 | OsR498G0203327500.01.T01 | Sodium/calcium exchanger                                                    |
| maker-2-augustus-gene-86.34-mRNA-1 | Japonica | Japonica |               | Os02g0249600 | OsR498G0203334100.01.T01 | Glutelin type-B                                                             |
| maker-2-augustus-gene-86.37-mRNA-1 | Japonica | NA       |               | Os02g0249900 | OsR498G0203334100.01.T01 | Glutelin type-B                                                             |
| maker-2-augustus-gene-86.40-mRNA-1 | Japonica | Indica   |               | Os02g0250300 | OsR498G0203336300.01.T03 | Transcription factor GTE4                                                   |
| maker-2-augustus-gene-86.43-mRNA-1 | Japonica | NA       |               | Os02g0250400 | OsR498G0203336700.01.T01 | GD5L esterase/lipase                                                        |
| maker-2-augustus-gene-86.47-mRNA-1 | Japonica | NA       |               | Os02g0249700 |                          | F-box domain-containing protein                                             |
| maker-2-augustus-gene-86.49-mRNA-1 | Japonica | NA       |               | Os02g0249900 | OsR498G0203334100.01.T01 | Glutelin type-B                                                             |
| maker-2-augustus-gene-87.34-mRNA-1 | Japonica | NA       |               | Os02g0252200 | OsR498G0203341300.01.T01 | NAC domain-containing protein 76                                            |
| maker-2-augustus-gene-87.36-mRNA-1 | Japonica | Indica   |               | Os02g0252100 | OsR498G0203340800.01.T01 | Pre-mRNA splicing factor                                                    |
| maker-2-augustus-gene-87.41-mRNA-1 | Japonica | Indica   |               | Os02g0252600 | OsR498G0203342400.01.T02 | D-aminoacid aminotransferase-like PLP-dependent enzymes superfamily protein |
| maker-2-augustus-gene-88.13-mRNA-1 | Japonica | NA       |               |              | OsR498G0203346200.01.T01 |                                                                             |
| maker-2-augustus-gene-88.16-mRNA-1 | Japonica | Indica   |               | Os06g0528600 | OsR498G0203346800.01.T01 | PABS domain-containing protein (Fragment)                                   |
| maker-2-augustus-gene-88.29-mRNA-1 | Japonica | NA       |               | Os02g0255200 | OsR498G0203348200.01.T01 | 30S ribosomal protein S8, chloroplastic                                     |
| maker-2-augustus-gene-88.6-mRNA-1  | Japonica | Indica   |               | Os02g0255500 | OsR498G0203349500.01.T01 | Abscisic acid receptor like                                                 |
| maker-2-augustus-gene-88.8-mRNA-1  | Japonica | NA       |               | Os02g0255500 | OsR498G0203350900.01.T01 | Abscisic acid receptor PYR/PYL family                                       |
| maker-2-augustus-gene-89.0-mRNA-1  | Japonica | NA       |               | Os02g0256100 | OsR498G0203351900.01.T01 | Pectin lyase-like superfamily protein (Fragment)                            |
| maker-2-augustus-gene-89.10-mRNA-1 | Japonica | NA       |               |              | OsR498G0203351800.01.T03 | clustered mitochondria protein isoform X4                                   |
| maker-2-augustus-gene-89.18-mRNA-1 | Japonica | Japonica |               | Os02g0256800 | OsR498G0203353400.01.T01 | Phytoecyanin domain-containing protein (Fragment)                           |
| maker-2-augustus-gene-89.20-mRNA-1 | Japonica | NA       |               | Os02g0257100 | OsR498G0203353400.01.T01 | Phytoecyanin domain-containing protein (Fragment)                           |
| maker-2-augustus-gene-89.22-mRNA-1 | Japonica | Japonica |               | Os02g0257200 | OsR498G0203353600.01.T01 | Polypyrimidine tract-binding protein-like protein 2                         |
| maker-2-augustus-gene-89.24-mRNA-1 | Japonica | NA       |               |              | OsR498G0203354000.01.T01 | BHLH transcription factor                                                   |
| maker-2-augustus-gene-89.3-mRNA-1  | Japonica | NA       |               | Os02g0257001 |                          |                                                                             |
| maker-2-augustus-gene-89.5-mRNA-1  | Japonica | NA       |               | Os02g0257300 | OsR498G0203353700.01.T01 | Rhodanese-like domain-containing protein 4 chloroplastic                    |
| maker-2-augustus-gene-90.0-mRNA-1  | Japonica | Indica   |               | Os02g0258200 | OsR498G0203358000.01.T01 | High mobility group B protein 6                                             |
| maker-2-augustus-gene-90.10-mRNA-1 | Japonica | NA       |               | Os02g0259600 | OsR498G0203362800.01.T01 | 50S ribosomal protein L21 chloroplastic                                     |
| maker-2-augustus-gene-90.2-mRNA-1  | Japonica | NA       |               | Os02g0258300 | OsR498G0203358200.01.T01 | Extra-large G-protein-like                                                  |
| maker-2-augustus-gene-90.5-mRNA-1  | Japonica | NA       |               | Os02g0258900 | OsR498G0203361000.01.T06 | GTP 3'-8-cyclase, mitochondrial isoform C                                   |
| maker-2-augustus-gene-91.14-mRNA-1 | Japonica | NA       |               |              | OsR498G0203363300.01.T02 | BAG family molecular chaperone regulator 6                                  |
| maker-2-augustus-gene-91.18-mRNA-1 | Japonica | Indica   |               | Os02g0260200 | OsR498G0203364900.01.T02 | F-box/kelch-repeat protein At3g61590                                        |
| maker-2-augustus-gene-91.20-mRNA-1 | Japonica | NA       |               | Os02g0260500 | OsR498G0203365500.01.T01 | Intracellular protein transport protein USO1-related                        |
| maker-2-augustus-gene-91.23-mRNA-1 | Japonica | NA       |               | Os02g0260700 | OsR498G0203366500.01.T01 | BTB/POZ domain-containing protein POB1                                      |
| maker-2-augustus-gene-91.27-mRNA-1 | Japonica | NA       |               | Os02g0261000 | OsR498G0203367900.01.T02 | Late embryogenesis abundant (LEA) hydroxyproline-rich glycoprotein family   |
| maker-2-augustus-gene-91.28-mRNA-1 | Japonica | Indica   |               | Os11g0706100 | OsR498G0203365400.01.T05 |                                                                             |
| maker-2-augustus-gene-92.25-mRNA-1 | Japonica | NA       |               | Os02g0261100 | OsR498G0203368500.01.T03 | UBC core domain-containing protein (Fragment)                               |
| maker-2-augustus-gene-93.0-mRNA-1  | Japonica | NA       |               | Os02g0262700 |                          | Putative bacterial blight-resistance protein Xa1                            |
| maker-2-augustus-gene-94.40-mRNA-1 | Japonica | NA       |               | Os02g0264300 | OsR498G0203370000.01.T01 | Plastid division protein PDV                                                |

|                                     |          |          |           |              |                          |                                                                                      |
|-------------------------------------|----------|----------|-----------|--------------|--------------------------|--------------------------------------------------------------------------------------|
| maker-2-augustus-gene-94.42-mRNA-1  | Japonica | NA       |           | Os02g0264800 | OsR498G0203372600.01.T01 | Arabinogalactan peptide                                                              |
| maker-2-augustus-gene-95.29-mRNA-1  | Japonica | NA       |           | Os02g0265200 | OsR498G0203373900.01.T01 | WRKY transcription factor                                                            |
| maker-2-augustus-gene-95.31-mRNA-1  | Japonica | Indica   |           | Os02g0265700 | OsR498G0203376100.01.T02 |                                                                                      |
| maker-2-augustus-gene-95.35-mRNA-1  | Japonica | NA       |           | Os02g0265900 | OsR498G0203376500.01.T02 | Reticulon-like protein (Fragment)                                                    |
| maker-2-augustus-gene-95.39-mRNA-1  | Japonica | NA       |           |              | OsR498G0203376700.01.T01 | Phosphoribosylanthranilate isomerase                                                 |
| maker-2-augustus-gene-95.42-mRNA-1  | Japonica | NA       |           | Os02g0266200 | OsR498G0203377100.01.T01 | Pentatricopeptide repeat-containing protein, putative                                |
| maker-2-augustus-gene-95.44-mRNA-1  | Japonica | NA       |           | Os02g0265400 | OsR498G0203375600.01.T01 | Vacuolar protein sorting-associated protein 29                                       |
| maker-2-augustus-gene-95.53-mRNA-1  | Japonica | Japonica |           | Os02g0266100 | OsR498G0203377000.01.T01 | U1 small nuclear ribonucleoprotein C                                                 |
| maker-2-augustus-gene-95.56-mRNA-1  | Japonica | NA       |           | Os02g0266300 | OsR498G0203377400.01.T02 | Putative ankyrin repeat-containing domain, P-loop containing nucleoside triphosphate |
| maker-2-augustus-gene-96.0-mRNA-1   | Japonica | NA       |           |              | OsR498G0203378100.01.T01 | tRNA(Ile)-2-lysyl-cytidine synthase                                                  |
| maker-2-augustus-gene-96.11-mRNA-1  | Japonica | NA       |           | Os02g0267200 | OsR498G0203379500.01.T01 | Expansin                                                                             |
| maker-2-augustus-gene-96.13-mRNA-1  | Japonica | NA       |           | Os02g0267700 | OsR498G0203380900.01.T01 | Expansin                                                                             |
| maker-2-augustus-gene-96.15-mRNA-1  | Japonica | Indica   |           | Os02g0268600 | OsR498G0203381700.01.T01 | Expansin                                                                             |
| maker-2-augustus-gene-96.17-mRNA-1  | Japonica | Indica   |           | Os02g0267700 | OsR498G0203383000.01.T01 | Expansin                                                                             |
| maker-2-augustus-gene-96.19-mRNA-1  | Japonica | NA       |           | Os02g0268300 | OsR498G0203382800.01.T01 | Glutelin type-B                                                                      |
| maker-2-augustus-gene-96.21-mRNA-1  | Japonica | NA       |           | Os02g0266800 | OsR498G0203378400.01.T01 | Basic leucine zipper 9                                                               |
| maker-2-augustus-gene-96.25-mRNA-1  | Japonica | NA       | Kinase-TM | Os01g0711200 | OsR498G0101870300.01.T01 | Putative leucine-rich repeat receptor-like protein kinase                            |
| maker-2-augustus-gene-96.29-mRNA-1  | Japonica | Indica   |           | Os02g0267700 | OsR498G0203383000.01.T01 | Expansin                                                                             |
| maker-2-augustus-gene-96.31-mRNA-1  | Japonica | NA       |           | Os02g0268600 | OsR498G0203383600.01.T01 | Expansin                                                                             |
| maker-2-augustus-gene-96.33-mRNA-1  | Japonica | NA       |           | Os02g0269000 | OsR498G0203384400.01.T01 | Protein CONTINUOUS VASCULAR RING 1                                                   |
| maker-2-augustus-gene-96.6-mRNA-1   | Japonica | NA       |           | Os02g0267000 | OsR498G0203379300.01.T01 | Chloroplast processing peptidase                                                     |
| maker-2-augustus-gene-97.27-mRNA-1  | Japonica | NA       |           | Os02g0269600 | OsR498G0203385800.01.T01 | Subtilisin-like protease                                                             |
| maker-2-augustus-gene-97.29-mRNA-1  | Japonica | Indica   |           | Os02g0270933 | OsR498G0203388600.01.T02 | Subtilisin-like protease                                                             |
| maker-2-augustus-gene-98.1-mRNA-1   | Japonica | Indica   |           | Os02g0270933 | OsR498G0203389000.01.T01 | Subtilisin-like protease                                                             |
| maker-2-augustus-gene-98.10-mRNA-1  | Japonica | NA       |           | Os02g0271000 | OsR498G0203389600.01.T01 | Subtilisin-like protease                                                             |
| maker-2-augustus-gene-98.14-mRNA-1  | Japonica | NA       |           | Os02g0271600 | OsR498G0203389800.01.T01 | Subtilisin-like protease                                                             |
| maker-2-augustus-gene-99.0-mRNA-1   | Japonica | NA       |           | Os02g0271900 | OsR498G0203390500.01.T02 | HTH myb-type domain-containing protein                                               |
| maker-2-augustus-gene-99.11-mRNA-1  | Japonica | NA       |           | Os02g0273100 | OsR498G0203395500.01.T01 | D-amino-acid transaminase, chloroplastic                                             |
| maker-2-augustus-gene-99.13-mRNA-1  | Japonica | NA       |           | Os02g0272400 | OsR498G0203393000.01.T01 | Eukaryotic translation initiation factor 3 subunit L-like                            |
| maker-2-augustus-gene-99.3-mRNA-1   | Japonica | NA       |           |              | OsR498G0203391700.01.T01 | Flavin-containing monooxygenase                                                      |
| maker-2-augustus-gene-99.5-mRNA-1   | Japonica | NA       |           | Os02g0272300 | OsR498G0203392500.01.T01 | Rho guanine nucleotide exchange factor like                                          |
| maker-2-augustus-gene-99.7-mRNA-1   | Japonica | NA       |           | Os02g0272600 | OsR498G0203393900.01.T01 | Gamma-secretase subunit Aph-1                                                        |
| maker-3-augustus-gene-1.35-mRNA-1   | Japonica | Indica   |           | Os05g0413200 | OsR498G0305083300.01.T01 | Tubulin beta chain                                                                   |
| maker-3-augustus-gene-1.37-mRNA-1   | Japonica | NA       |           | Os03g0105500 |                          |                                                                                      |
| maker-3-augustus-gene-1.38-mRNA-1   | Japonica | NA       |           | Os03g0105700 | OsR498G0305083600.01.T01 | AT-hook motif nuclear-localized protein (Fragment)                                   |
| maker-3-augustus-gene-1.41-mRNA-1   | Japonica | NA       |           | Os03g0105800 | OsR498G0305083800.01.T02 | PPC domain-containing protein                                                        |
| maker-3-augustus-gene-1.43-mRNA-1   | Japonica | NA       |           | Os03g0106000 | OsR498G0305084600.01.T02 | UPF0187 protein chloroplastic                                                        |
| maker-3-augustus-gene-1.46-mRNA-1   | Japonica | NA       |           | Os03g0106200 | OsR498G0305085200.01.T03 | Phosphatidylinositol N-acetylglucosaminyltransferase subunit P-related               |
| maker-3-augustus-gene-1.49-mRNA-1   | Japonica | NA       |           | Os03g0106300 | OsR498G0305085400.01.T01 |                                                                                      |
| maker-3-augustus-gene-1.51-mRNA-1   | Japonica | NA       |           | Os03g0106400 | OsR498G0305085600.01.T02 | Branched-chain-amino-acid aminotransferase                                           |
| maker-3-augustus-gene-1.56-mRNA-1   | Japonica | Japonica |           | Os03g0106700 | OsR498G0305087100.01.T01 | Group I pollen allergen                                                              |
| maker-3-augustus-gene-10.20-mRNA-1  | Japonica | NA       | Kinase-TM | Os03g0122000 | OsR498G0305141900.01.T02 | Serine/threonine-protein kinase ATG1a                                                |
| maker-3-augustus-gene-10.25-mRNA-1  | Japonica | NA       |           |              | OsR498G0305142500.01.T01 | Transcription factor bHLH70                                                          |
| maker-3-augustus-gene-10.28-mRNA-1  | Japonica | NA       |           |              | OsR498G0305141600.01.T02 | Endoribonuclease Dicer like 1                                                        |
| maker-3-augustus-gene-10.40-mRNA-1  | Japonica | NA       |           | Os03g0122200 | OsR498G0305143000.01.T01 | Plastid ribosomal protein I11                                                        |
| maker-3-augustus-gene-10.43-mRNA-1  | Japonica | NA       |           | Os03g0122300 | OsR498G0305143200.01.T02 | Flavanone 3-dioxygenase                                                              |
| maker-3-augustus-gene-10.46-mRNA-1  | Japonica | NA       |           |              |                          | Transposon protein, putative, Mutator sub-class, expressed                           |
| maker-3-augustus-gene-100.0-mRNA-1  | Japonica | NA       |           |              | OsR498G0305746100.01.T02 | Pherophorin like protein                                                             |
| maker-3-augustus-gene-100.13-mRNA-1 | Japonica | Indica   |           | Os03g0293850 | OsR498G0305744600.01.T08 |                                                                                      |
| maker-3-augustus-gene-100.17-mRNA-1 | Japonica | Indica   |           | Os05g0353400 | OsR498G0305747000.01.T01 | Importin subunit beta-1 like                                                         |
| maker-3-augustus-gene-100.19-mRNA-1 | Japonica | NA       | Kinase-TM | Os03g0294800 | OsR498G0305747600.01.T01 | Putative LRR receptor-like serine/threonine-protein kinase MRH1                      |
| maker-3-augustus-gene-100.2-mRNA-1  | Japonica | Indica   |           | Os03g0294200 | OsR498G0305746300.01.T01 | 6-phosphofructo-2-kinase/fructose-26-bisphosphatase                                  |
| maker-3-augustus-gene-100.9-mRNA-1  | Japonica | NA       |           | Os03g0293500 | OsR498G0305742800.01.T01 | Pyruvate decarboxylase                                                               |
| maker-3-augustus-gene-101.0-mRNA-1  | Japonica | NA       |           | Os03g0295500 | OsR498G0305749300.01.T02 | CHCH domain containing protein, expressed                                            |
| maker-3-augustus-gene-101.11-mRNA-1 | Japonica | NA       |           | Os03g0296400 | OsR498G0305752700.01.T01 | Eukaryotic translation initiation factor 2 subunit alpha                             |
| maker-3-augustus-gene-101.17-mRNA-1 | Japonica | NA       |           | Os03g0296800 | OsR498G0305753700.01.T02 | Mitoferrin                                                                           |
| maker-3-augustus-gene-101.2-mRNA-1  | Japonica | NA       |           | Os03g0295700 | OsR498G0305750700.01.T04 | Rab3 GTPase-activating protein catalytic subunit                                     |
| maker-3-augustus-gene-101.20-mRNA-1 | Japonica | NA       |           | Os03g0297100 | OsR498G0305754100.01.T01 | 40S ribosomal protein S7                                                             |
| maker-3-augustus-gene-101.23-mRNA-1 | Japonica | NA       |           | Os03g0297100 | OsR498G0305754500.01.T01 | 40S ribosomal protein S7                                                             |
| maker-3-augustus-gene-101.25-mRNA-1 | Japonica | NA       |           | Os03g0295400 | OsR498G0305749200.01.T02 | DNA-directed RNA polymerases I and III subunit RPAC1                                 |
| maker-3-augustus-gene-101.30-mRNA-1 | Japonica | NA       | Kinase-TM | Os03g0295600 | OsR498G0305749600.01.T01 | Serine/threonine-protein kinase STY46                                                |

|                                     |          |          |                  |              |                          |                                                                             |
|-------------------------------------|----------|----------|------------------|--------------|--------------------------|-----------------------------------------------------------------------------|
| maker-3-augustus-gene-101.32-mRNA-1 | Japonica | Indica   |                  | Os03g0295800 | OsR498G0305751000.01.T02 | Gamma interferon inducible lysosomal thiol reductase GILT                   |
| maker-3-augustus-gene-101.37-mRNA-1 | Japonica | NA       |                  | Os03g0296000 | OsR498G0305751800.01.T01 | Myb transcription factor                                                    |
| maker-3-augustus-gene-101.40-mRNA-1 | Japonica | NA       |                  |              |                          | Mitochondrial import inner membrane translocase                             |
| maker-3-augustus-gene-101.43-mRNA-1 | Japonica | NA       |                  |              |                          | [Acyl-carrier-protein] S-malonyltransferase                                 |
| maker-3-augustus-gene-101.9-mRNA-1  | Japonica | NA       |                  | Os03g0296200 | OsR498G0305752300.01.T01 |                                                                             |
| maker-3-augustus-gene-102.11-mRNA-1 | Japonica | NA       |                  | Os03g0298400 | OsR498G0305759700.01.T01 | 26S protease regulatory subunit 4 isogeny                                   |
| maker-3-augustus-gene-102.15-mRNA-1 | Japonica | NA       |                  | Os03g0299200 | OsR498G0305761900.01.T01 | Tasselseed2-like short-chain dehydrogenase/reductase (Fragment)             |
| maker-3-augustus-gene-102.17-mRNA-1 | Japonica | NA       |                  | Os03g0298600 | OsR498G0305760000.01.T02 | Iron regulated 1 protein                                                    |
| maker-3-augustus-gene-102.19-mRNA-1 | Japonica | NA       |                  | Os03g0298700 | OsR498G0305760200.01.T01 |                                                                             |
| maker-3-augustus-gene-102.25-mRNA-1 | Japonica | NA       |                  | Os03g0298800 | OsR498G0305760400.01.T01 | U1 small nuclear ribonucleoprotein A/U2 small nuclear ribonucleoprotein B   |
| maker-3-augustus-gene-102.3-mRNA-1  | Japonica | Indica   | CC-Kinase-LRR-TM | Os03g0297800 | OsR498G0305757700.01.T01 | Probably inactive leucine-rich repeat receptor-like protein kinase IMK2     |
| maker-3-augustus-gene-102.5-mRNA-1  | Japonica | NA       |                  | Os03g0297900 |                          | Laccase                                                                     |
| maker-3-augustus-gene-102.8-mRNA-1  | Japonica | NA       |                  | Os03g0298300 | OsR498G0305759300.01.T01 | AAA domain-containing protein                                               |
| maker-3-augustus-gene-103.34-mRNA-1 | Japonica | NA       |                  | Os03g0299900 | OsR498G0305765300.01.T01 | LL-diaminopimelate aminotransferase chloroplastic                           |
| maker-3-augustus-gene-103.39-mRNA-1 | Japonica | NA       |                  | Os03g0300300 | OsR498G0305766500.01.T01 | Utp12 domain-containing protein                                             |
| maker-3-augustus-gene-103.43-mRNA-1 | Japonica | NA       |                  | Os03g0300400 | OsR498G0305766700.01.T01 | Pathogenesis related protein 10                                             |
| maker-3-augustus-gene-103.45-mRNA-1 | Japonica | NA       |                  | Os03g0301400 | OsR498G0305771300.01.T02 | three prime repair exonuclease 2                                            |
| maker-3-augustus-gene-103.47-mRNA-1 | Japonica | NA       |                  |              | OsR498G0305771500.01.T02 | Zinc finger CCHC domain-containing protein 9                                |
| maker-3-augustus-gene-103.49-mRNA-1 | Japonica | NA       |                  | Os03g0300200 | OsR498G0305766400.01.T04 | Programmed cell death protein 2                                             |
| maker-3-augustus-gene-103.54-mRNA-1 | Japonica | NA       |                  | Os03g0300600 | OsR498G0305767800.01.T01 | J domain-containing protein                                                 |
| maker-3-augustus-gene-104.32-mRNA-1 | Japonica | NA       |                  |              | OsR498G0305771500.01.T04 | Calmodulin-binding protein 60 D                                             |
| maker-3-augustus-gene-104.37-mRNA-1 | Japonica | NA       |                  | Os03g0302200 | OsR498G0305773700.01.T06 | Remodeling and spacing factor 1-like                                        |
| maker-3-augustus-gene-104.39-mRNA-1 | Japonica | NA       |                  | Os03g0302500 | OsR498G0305774300.01.T01 | Cytoplasmic dynein 1 light intermediate chain 2                             |
| maker-3-augustus-gene-104.40-mRNA-1 | Japonica | NA       |                  | Os03g0302900 | OsR498G0305775700.01.T02 | DUF4378 domain-containing protein (Fragment)                                |
| maker-3-augustus-gene-104.43-mRNA-1 | Japonica | NA       |                  | Os03g0301700 | OsR498G0305771800.01.T03 | PPM-type phosphatase domain-containing protein                              |
| maker-3-augustus-gene-104.48-mRNA-1 | Japonica | NA       |                  |              |                          | p-loop nucleoside triphosphate hydrolase superfamily protein with CH (Calp) |
| maker-3-augustus-gene-104.54-mRNA-1 | Japonica | NA       |                  |              | OsR498G0305776800.01.T01 | Myb-related protein P                                                       |
| maker-3-augustus-gene-105.25-mRNA-1 | Japonica | NA       |                  | Os03g0304400 | OsR498G0305778900.01.T02 | BRCA1 C Terminus domain containing protein, expressed                       |
| maker-3-augustus-gene-105.29-mRNA-1 | Japonica | NA       |                  | Os03g0304100 | OsR498G0305778600.01.T01 | Glycine-rich protein family                                                 |
| maker-3-augustus-gene-105.31-mRNA-1 | Japonica | NA       |                  |              | OsR498G0305778800.01.T01 |                                                                             |
| maker-3-augustus-gene-105.33-mRNA-1 | Japonica | NA       |                  | Os03g0304500 | OsR498G0305780400.01.T01 | J domain-containing protein                                                 |
| maker-3-augustus-gene-105.36-mRNA-1 | Japonica | Indica   |                  | Os03g0304800 | OsR498G0305782200.01.T03 | Negatively light-regulated protein, putative, expressed                     |
| maker-3-augustus-gene-106.0-mRNA-1  | Japonica | NA       |                  | Os03g0305500 | OsR498G0305786100.01.T02 | Fumarate lyase                                                              |
| maker-3-augustus-gene-106.10-mRNA-1 | Japonica | NA       |                  |              | OsR498G0305787700.01.T01 |                                                                             |
| maker-3-augustus-gene-106.11-mRNA-1 | Japonica | NA       |                  | Os03g0306700 | OsR498G0305789700.01.T01 | BZIP transcription factor                                                   |
| maker-3-augustus-gene-106.12-mRNA-1 | Japonica | NA       |                  | Os03g0307000 | OsR498G0305790900.01.T02 | Nicotianamine synthase6                                                     |
| maker-3-augustus-gene-106.14-mRNA-1 | Japonica | Indica   |                  | Os03g0305100 | OsR498G0305783600.01.T01 | Acetate-CoA ligase                                                          |
| maker-3-augustus-gene-106.16-mRNA-1 | Japonica | NA       |                  | Os03g0305100 | OsR498G0305784600.01.T02 | Acetate-CoA ligase                                                          |
| maker-3-augustus-gene-106.18-mRNA-1 | Japonica | NA       |                  | Os03g0305400 | OsR498G0305786000.01.T04 | Usp domain-containing protein (Fragment)                                    |
| maker-3-augustus-gene-106.21-mRNA-1 | Japonica | NA       |                  |              | OsR498G0305788200.01.T01 | WD40/YVTN repeat-like-containing domain                                     |
| maker-3-augustus-gene-106.29-mRNA-1 | Japonica | NA       | CC-NBS-TM        | Os03g0306400 | OsR498G0305788600.01.T02 | Lon protease, mitochondrial                                                 |
| maker-3-augustus-gene-106.3-mRNA-1  | Japonica | NA       |                  | Os03g0305600 | OsR498G0305786300.01.T04 | Outer envelope pore protein 16-2 chloroplastic                              |
| maker-3-augustus-gene-106.35-mRNA-1 | Japonica | NA       |                  | Os03g0306900 | OsR498G0305790600.01.T01 | Seed maturation protein PM36                                                |
| maker-3-augustus-gene-106.6-mRNA-1  | Japonica | NA       |                  | Os03g0305700 | OsR498G0305786500.01.T01 | PCRF domain-containing protein (Fragment)                                   |
| maker-3-augustus-gene-107.40-mRNA-1 | Japonica | NA       |                  | Os03g0307100 | OsR498G0305791100.01.T01 | Probable glutamyl endopeptidase, chloroplastic                              |
| maker-3-augustus-gene-107.44-mRNA-1 | Japonica | NA       |                  | Os03g0307400 | OsR498G0305792900.01.T01 | Calcium-dependent phosphotriesterase superfamily protein                    |
| maker-3-augustus-gene-107.46-mRNA-1 | Japonica | NA       |                  |              | OsR498G0305792900.01.T02 | Putative ARM repeat-containing protein containing family protein            |
| maker-3-augustus-gene-107.48-mRNA-1 | Japonica | Japonica |                  | Os03g0307700 | OsR498G0305793500.01.T02 | Protein trichome birefringence                                              |
| maker-3-augustus-gene-107.56-mRNA-1 | Japonica | NA       |                  | Os03g0308500 | OsR498G0305794900.01.T01 | DEAD-box ATP-dependent RNA helicase                                         |
| maker-3-augustus-gene-107.59-mRNA-1 | Japonica | Indica   |                  | Os03g0308600 | OsR498G0305795100.01.T02 |                                                                             |
| maker-3-augustus-gene-107.62-mRNA-1 | Japonica | Indica   |                  | Os03g0308700 | OsR498G0305795300.01.T01 | Energy transducer TonB                                                      |
| maker-3-augustus-gene-107.64-mRNA-1 | Japonica | NA       |                  | Os03g0307800 | OsR498G0305793800.01.T01 | Histone-lysine N-methyltransferase EZ3                                      |
| maker-3-augustus-gene-107.68-mRNA-1 | Japonica | NA       |                  | Os03g0308100 | OsR498G0305794200.01.T01 | ATP-dependent Clp protease proteolytic subunit                              |
| maker-3-augustus-gene-107.73-mRNA-1 | Japonica | NA       |                  | Os03g0308200 | OsR498G0305794600.01.T06 | ARM repeat superfamily protein                                              |
| maker-3-augustus-gene-107.78-mRNA-1 | Japonica | NA       |                  | Os03g0308800 | OsR498G0305795600.01.T01 | High chlorophyll fluorescent 107                                            |
| maker-3-augustus-gene-107.82-mRNA-1 | Japonica | NA       |                  |              | OsR498G0305796000.01.T01 | Pre-mRNA 3'-end-processing factor FIP1                                      |
| maker-3-augustus-gene-107.85-mRNA-1 | Japonica | NA       |                  | Os03g0309000 | OsR498G0305796200.01.T02 | Heme binding                                                                |
| maker-3-augustus-gene-108.0-mRNA-1  | Japonica | NA       |                  | Os03g0309200 | OsR498G0305797300.01.T04 | Phytochrome B                                                               |
| maker-3-augustus-gene-108.11-mRNA-1 | Japonica | NA       |                  | Os03g0310400 |                          | Crotonase superfamily                                                       |
| maker-3-augustus-gene-108.13-mRNA-1 | Japonica | NA       |                  |              | OsR498G0305801100.01.T01 | Protein-serine/threonine phosphatase (Fragment)                             |
| maker-3-augustus-gene-108.20-mRNA-1 | Japonica | NA       |                  | Os03g0309400 | OsR498G0305798400.01.T01 | Pectinesterase                                                              |

|                                     |          |          |               |              |                          |                                                                      |
|-------------------------------------|----------|----------|---------------|--------------|--------------------------|----------------------------------------------------------------------|
| maker-3-augustus-gene-108.22-mRNA-1 | Japonica | NA       |               | Os03g0310900 |                          |                                                                      |
| maker-3-augustus-gene-108.9-mRNA-1  | Japonica | NA       |               | Os03g0310000 | OsR498G0305800500.01.T01 | GDLS-like Lipase/Acylhydrolase family protein, expressed             |
| maker-3-augustus-gene-109.34-mRNA-1 | Japonica | NA       |               |              |                          | NHL repeat-containing protein 2                                      |
| maker-3-augustus-gene-109.40-mRNA-1 | Japonica | NA       |               | Os03g0312600 | OsR498G0305809900.01.T06 | GPN-loop GTPase                                                      |
| maker-3-augustus-gene-109.43-mRNA-1 | Japonica | NA       |               | Os03g0313000 | OsR498G0305810300.01.T01 | NADH-ubiquinone oxidoreductase 13 kDa-B subunit                      |
| maker-3-augustus-gene-109.45-mRNA-1 | Japonica | NA       |               | Os03g0312300 | OsR498G0305808600.01.T01 | Cysteine-rich repeat secretory protein 55                            |
| maker-3-augustus-gene-109.47-mRNA-1 | Japonica | NA       |               | Os03g0313100 | OsR498G0305810800.01.T01 | AP2-EREBP transcription factor                                       |
| maker-3-augustus-gene-109.49-mRNA-1 | Japonica | NA       |               |              |                          | Polynucleotide adenylyltransferase                                   |
| maker-3-augustus-gene-11.0-mRNA-1   | Japonica | NA       |               | Os03g0123100 | OsR498G0305147500.01.T04 | UBC core domain-containing protein (Fragment)                        |
| maker-3-augustus-gene-11.12-mRNA-1  | Japonica | Indica   |               | Os03g0123500 | OsR498G0305149500.01.T01 | Transcription factor HD1                                             |
| maker-3-augustus-gene-11.17-mRNA-1  | Japonica | NA       |               | Os03g0123800 | OsR498G0305150500.01.T01 | MENTAL domain-containing protein                                     |
| maker-3-augustus-gene-11.19-mRNA-1  | Japonica | NA       |               | Os03g0124000 | OsR498G0305151300.01.T01 | Associated with HOX family protein, expressed                        |
| maker-3-augustus-gene-11.21-mRNA-1  | Japonica | Japonica |               | Os03g0122600 | OsR498G1019100900.01.T01 | K-box domain-containing protein (Fragment)                           |
| maker-3-augustus-gene-11.22-mRNA-1  | Japonica | Japonica |               | Os03g0122600 | OsR498G1019100900.01.T03 | MADS box transcription factor 5                                      |
| maker-3-augustus-gene-11.29-mRNA-1  | Japonica | NA       |               | Os03g0123600 | OsR498G0305149800.01.T01 | Putative diphthine synthase-like                                     |
| maker-3-augustus-gene-11.4-mRNA-1   | Japonica | NA       |               | Os03g0123200 | OsR498G0305147700.01.T01 | Phragmoplastin interacting protein 1                                 |
| maker-3-augustus-gene-11.8-mRNA-1   | Japonica | NA       |               | Os03g0123300 | OsR498G0305148100.01.T03 | Cell division cycle 20-like protein 1, cofactor of APC complex       |
| maker-3-augustus-gene-110.0-mRNA-1  | Japonica | NA       |               | Os03g0313600 | OsR498G0305813300.01.T03 | Adenylosuccinate lyase                                               |
| maker-3-augustus-gene-110.13-mRNA-1 | Japonica | NA       |               | Os03g0314700 | OsR498G0305816700.01.T01 | NifU-like protein 1 chloroplastic                                    |
| maker-3-augustus-gene-110.16-mRNA-1 | Japonica | NA       |               | Os03g0313800 |                          |                                                                      |
| maker-3-augustus-gene-110.18-mRNA-1 | Japonica | NA       |               | Os03g0314200 | OsR498G0305815000.01.T03 | Protein REDUCED WALL ACETYLTATION 3 isoform A                        |
| maker-3-augustus-gene-110.25-mRNA-1 | Japonica | NA       |               | Os03g0314800 | OsR498G0305817600.01.T02 | Alkaline/neutral invertase                                           |
| maker-3-augustus-gene-110.5-mRNA-1  | Japonica | Indica   |               | Os03g0314100 | OsR498G0305814700.01.T03 | RNA helicase                                                         |
| maker-3-augustus-gene-111.0-mRNA-1  | Japonica | NA       |               | Os03g0316200 | OsR498G0305823100.01.T01 | Hexosyltransferase                                                   |
| maker-3-augustus-gene-111.11-mRNA-1 | Japonica | NA       |               | Os03g0315800 | OsR498G0305822400.01.T01 | Tex protein-relatedtranscription accessory protein, putative         |
| maker-3-augustus-gene-111.3-mRNA-1  | Japonica | NA       |               | Os03g0316900 | OsR498G0305824900.01.T01 | Non-intrinsic abc protein 9                                          |
| maker-3-augustus-gene-111.6-mRNA-1  | Japonica | NA       |               | Os03g0317000 | OsR498G0305825100.01.T04 | YTH domain-containing family protein 2                               |
| maker-3-augustus-gene-111.9-mRNA-1  | Japonica | NA       |               | Os03g0315400 | OsR498G0305819800.01.T01 | Myb domain protein 78                                                |
| maker-3-augustus-gene-112.30-mRNA-1 | Japonica | NA       |               |              |                          | Transposon protein, putative, Mutator sub-class, expressed           |
| maker-3-augustus-gene-112.32-mRNA-1 | Japonica | NA       |               | Os03g0318500 | OsR498G0305829400.01.T05 | Glucose-6-phosphate 1-dehydrogenase                                  |
| maker-3-augustus-gene-112.35-mRNA-1 | Japonica | NA       |               | Os03g0318600 | OsR498G0305829600.01.T04 | BZIP transcription factor                                            |
| maker-3-augustus-gene-113.26-mRNA-1 | Japonica | Indica   |               | Os07g0687300 | OsR498G0305831100.01.T01 | 5'-AMP-activated protein kinase beta-2 subunit protein isoform 1     |
| maker-3-augustus-gene-113.30-mRNA-1 | Japonica | NA       |               |              | OsR498G0305831500.01.T01 | ESX-1 secretion-associated protein EspI-like                         |
| maker-3-augustus-gene-113.32-mRNA-1 | Japonica | NA       |               | Os03g0319300 | OsR498G0305832300.01.T01 | Calmodulin                                                           |
| maker-3-augustus-gene-113.34-mRNA-1 | Japonica | NA       |               | Os03g0320400 | OsR498G0305835500.01.T01 |                                                                      |
| maker-3-augustus-gene-113.36-mRNA-1 | Japonica | NA       | Kinase-LRR-TM |              | OsR498G0305838900.01.T01 | Putative inactive receptor kinase                                    |
| maker-3-augustus-gene-113.42-mRNA-1 | Japonica | NA       |               | Os03g0321000 | OsR498G0305839700.01.T01 | Membrane steroid-binding protein 2                                   |
| maker-3-augustus-gene-113.44-mRNA-1 | Japonica | NA       | Kinase-TM     | Os03g0319400 | OsR498G0305833000.01.T03 | CBL-interacting protein kinase                                       |
| maker-3-augustus-gene-113.54-mRNA-1 | Japonica | NA       |               | Os03g0320000 | OsR498G0305835000.01.T01 | Aquaporin SIP                                                        |
| maker-3-augustus-gene-113.56-mRNA-1 | Japonica | NA       |               |              | OsR498G0305835200.01.T01 | Non-reducing end alpha-L-arabinofuranosidase                         |
| maker-3-augustus-gene-114.0-mRNA-1  | Japonica | NA       |               | Os03g0321700 | OsR498G0305844700.01.T01 | WRKY DNA binding domain containing protein, expressed                |
| maker-3-augustus-gene-114.14-mRNA-1 | Japonica | NA       |               | Os03g0322600 | OsR498G0305846700.01.T03 | HIT domain-containing protein                                        |
| maker-3-augustus-gene-114.16-mRNA-1 | Japonica | NA       |               | Os03g0322800 | OsR498G0305847900.01.T01 | ELMO domain-containing protein A                                     |
| maker-3-augustus-gene-114.2-mRNA-1  | Japonica | Japonica |               | Os03g0321900 | OsR498G0305845100.01.T03 | tRNA-specific adenosine deaminase                                    |
| maker-3-augustus-gene-114.20-mRNA-1 | Japonica | Indica   |               | Os04g0455900 | OsR498G0305842400.01.T03 | Serologically defined breast cancer antigen NY-BR-84                 |
| maker-3-augustus-gene-114.26-mRNA-1 | Japonica | NA       |               | Os03g0321500 | OsR498G0305842800.01.T02 | DUF632 domain-containing protein                                     |
| maker-3-augustus-gene-114.30-mRNA-1 | Japonica | Indica   |               | Os07g0686400 | OsR498G0305845600.01.T01 | Centromere protein-like                                              |
| maker-3-augustus-gene-114.33-mRNA-1 | Japonica | Indica   |               | Os07g0686100 | OsR498G0305847200.01.T01 | ABSCISIC ACID-INSENSITIVE 5-like protein 2 isoform D                 |
| maker-3-augustus-gene-114.7-mRNA-1  | Japonica | NA       |               | Os03g0322500 | OsR498G0305846500.01.T01 | 14 kDa zinc-binding protein, putative, expressed                     |
| maker-3-augustus-gene-117.30-mRNA-1 | Japonica | NA       |               |              | OsR498G0305067900.01.T05 | tRNA/rRNA methyltransferase (SpoU) family protein                    |
| maker-3-augustus-gene-117.37-mRNA-1 | Japonica | NA       |               | Os03g0100800 | OsR498G0305068300.01.T03 | Plasma membrane ATPase                                               |
| maker-3-augustus-gene-118.36-mRNA-1 | Japonica | Indica   |               | Os08g0155400 | OsR498G0305075700.01.T01 | Solute carrier family 15 (Peptide/histidine transporter), member 3/4 |
| maker-3-augustus-gene-118.38-mRNA-1 | Japonica | NA       |               | Os03g0103800 | OsR498G0305081700.01.T01 |                                                                      |
| maker-3-augustus-gene-118.40-mRNA-1 | Japonica | NA       |               |              |                          | PPM-type phosphatase domain-containing protein                       |
| maker-3-augustus-gene-119.0-mRNA-1  | Japonica | NA       |               | Os10g0557600 | OsR498G1019180300.01.T04 | GATA transcription factor                                            |
| maker-3-augustus-gene-12.0-mRNA-1   | Japonica | NA       |               | Os03g0124100 | OsR498G0305151500.01.T01 | Beta-1,3-N-acetylglucosaminyltransferase lunatic fringe              |
| maker-3-augustus-gene-12.14-mRNA-1  | Japonica | NA       |               |              |                          | Sphingoid long-chain bases kinase                                    |
| maker-3-augustus-gene-12.18-mRNA-1  | Japonica | Indica   | Kinase-TM     | Os10g0533150 | OsR498G0305155100.01.T01 | probable serine/threonine-protein kinase At1g01540                   |
| maker-3-augustus-gene-12.23-mRNA-1  | Japonica | NA       |               | Os03g0125800 | OsR498G0305156500.01.T01 | Metal transporter CNNM                                               |
| maker-3-augustus-gene-12.3-mRNA-1   | Japonica | NA       |               | Os03g0124500 | OsR498G0305152300.01.T01 | PORR domain-containing protein                                       |
| maker-3-augustus-gene-12.31-mRNA-1  | Japonica | NA       |               | Os03g0125900 | OsR498G0305156900.01.T01 |                                                                      |

|                                     |          |          |               |              |                          |                                                                           |
|-------------------------------------|----------|----------|---------------|--------------|--------------------------|---------------------------------------------------------------------------|
| maker-3-augustus-gene-12.33-mRNA-1  | Japonica | NA       |               | Os03g0125000 | OsR498G0305153600.01.T01 | 50S ribosomal protein L5, chloroplastic                                   |
| maker-3-augustus-gene-12.35-mRNA-1  | Japonica | Japonica |               | Os03g0125100 | OsR498G0305153800.01.T01 | Beta-carotene 3-hydroxylase                                               |
| maker-3-augustus-gene-12.39-mRNA-1  | Japonica | NA       |               | Os03g0125700 | OsR498G0305155800.01.T02 | Cleavage and polyadenylation specificity factor subunit 1                 |
| maker-3-augustus-gene-12.44-mRNA-1  | Japonica | NA       |               | Os03g0126000 | OsR498G0305157200.01.T02 | Anthrnilate phosphoribosyltransferase                                     |
| maker-3-augustus-gene-12.49-mRNA-1  | Japonica | Indica   |               | Os03g0126100 | OsR498G0305157400.01.T03 | C-terminal binding protein AN                                             |
| maker-3-augustus-gene-12.5-mRNA-1   | Japonica | NA       |               | Os03g0124900 | OsR498G0305153300.01.T01 | Polygalacturonase                                                         |
| maker-3-augustus-gene-12.9-mRNA-1   | Japonica | NA       |               | Os03g0125300 | OsR498G0305154500.01.T01 | G patch domain-containing protein 4 isoform X2                            |
| maker-3-augustus-gene-120.4-mRNA-1  | Japonica | NA       |               | Os10g0558200 | OsR498G1019184400.01.T01 | S-norocclaurine synthase 1-like isoform X2                                |
| maker-3-augustus-gene-121.0-mRNA-1  | Japonica | NA       |               |              | OsR498G1019194100.01.T01 | Sphingomyelin phosphodiesterase like                                      |
| maker-3-augustus-gene-121.22-mRNA-1 | Japonica | NA       |               | Os01g0200000 | OsR498G0100350800.01.T02 | Autophagy-related protein 3                                               |
| maker-3-augustus-gene-125.11-mRNA-1 | Japonica | NA       |               | Os10g0569000 | OsR498G1019225700.01.T02 |                                                                           |
| maker-3-augustus-gene-125.25-mRNA-1 | Japonica | NA       |               |              | OsR498G1019222000.01.T01 | Transposon protein, putative, Pong sub-class                              |
| maker-3-augustus-gene-125.27-mRNA-1 | Japonica | NA       |               | Os10g0567800 | OsR498G1019222200.01.T02 | Dynamin-related protein 1E                                                |
| maker-3-augustus-gene-125.36-mRNA-1 | Japonica | NA       |               |              | OsR498G1019223000.01.T05 | DUF295 domain-containing protein                                          |
| maker-3-augustus-gene-125.37-mRNA-1 | Japonica | NA       |               | Os10g0568300 | OsR498G1019223400.01.T01 | VAN3-binding protein-like                                                 |
| maker-3-augustus-gene-125.41-mRNA-1 | Japonica | NA       | LRR-NBS-TM    | Os10g0568600 | OsR498G1019224400.01.T01 | NB-ARC domain-containing protein (Fragment)                               |
| maker-3-augustus-gene-125.43-mRNA-1 | Japonica | NA       |               | Os10g0569100 | OsR498G1019226000.01.T01 | PIG-P domain-containing protein                                           |
| maker-3-augustus-gene-125.46-mRNA-1 | Japonica | NA       |               | Os10g0569200 | OsR498G1019226200.01.T01 | Eukaryotic translation initiation factor 3 subunit B                      |
| maker-3-augustus-gene-126.39-mRNA-1 | Japonica | NA       |               | Os10g0569300 | OsR498G1019226300.01.T02 | Methyltransferase                                                         |
| maker-3-augustus-gene-126.42-mRNA-1 | Japonica | NA       |               | Os10g0569500 | OsR498G1019227700.01.T03 |                                                                           |
| maker-3-augustus-gene-126.46-mRNA-1 | Japonica | NA       |               | Os10g0571100 | OsR498G1019231700.01.T02 | NADH dehydrogenase [ubiquinone] 1 alpha subcomplex assembly factor 3      |
| maker-3-augustus-gene-126.53-mRNA-1 | Japonica | NA       |               | Os10g0571200 | OsR498G1019231900.01.T01 | Pyruvate kinase                                                           |
| maker-3-augustus-gene-126.57-mRNA-1 | Japonica | NA       | Kinase-TM     | Os10g0571300 | OsR498G1019232500.01.T01 | probable serine/threonine-protein kinase At4g35230                        |
| maker-3-augustus-gene-126.61-mRNA-1 | Japonica | NA       |               |              | OsR498G1019231600.01.T03 |                                                                           |
| maker-3-augustus-gene-127.33-mRNA-1 | Japonica | NA       |               | Os10g0572000 | OsR498G1019234700.01.T01 | G domain-containing protein (Fragment)                                    |
| maker-3-augustus-gene-127.37-mRNA-1 | Japonica | NA       | CC-LRR        | Os10g0572300 | OsR498G1019235500.01.T03 | Plant intracellular Ras-group-related LRR protein 5                       |
| maker-3-augustus-gene-127.39-mRNA-1 | Japonica | NA       |               | Os10g0573000 | OsR498G1019238100.01.T01 | PfkB-like carbohydrate kinase family protein isoform 1                    |
| maker-3-augustus-gene-127.43-mRNA-1 | Japonica | NA       |               | Os10g0573100 | OsR498G1019238300.01.T05 | AMMECR1 domain-containing protein                                         |
| maker-3-augustus-gene-127.48-mRNA-1 | Japonica | NA       |               | Os10g0572100 | OsR498G1019235000.01.T01 | Aluminum-activated malate transporter like                                |
| maker-3-augustus-gene-127.50-mRNA-1 | Japonica | NA       |               |              | OsR498G1019236000.01.T03 | RING/FYVE/PHD zinc finger superfamily protein                             |
| maker-3-augustus-gene-127.60-mRNA-1 | Japonica | NA       |               | Os12g0264500 | OsR498G1221246300.01.T05 | Enoyl-CoA hydratase/isomerase, HIBYL-CoA-H type                           |
| maker-3-augustus-gene-127.72-mRNA-1 | Japonica | NA       |               |              | OsR498G1019237200.01.T02 | AT-hook motif nuclear-localized protein (Fragment)                        |
| maker-3-augustus-gene-128.0-mRNA-1  | Japonica | NA       |               | Os10g0573700 | OsR498G1019239600.01.T04 | Mitochondrial substrate/solute carrier                                    |
| maker-3-augustus-gene-128.2-mRNA-1  | Japonica | NA       |               | Os10g0574500 | OsR498G1019241600.01.T02 | Replication factor C subunit                                              |
| maker-3-augustus-gene-128.6-mRNA-1  | Japonica | NA       |               | Os10g0574700 | OsR498G1019242000.01.T01 | PLATZ transcription factor                                                |
| maker-3-augustus-gene-128.9-mRNA-1  | Japonica | NA       |               | Os10g0574800 | OsR498G1019243200.01.T01 | ADP-ribosylation factor GTPase-activating protein AGD8                    |
| maker-3-augustus-gene-129.34-mRNA-1 | Japonica | NA       |               | Os10g0575700 | OsR498G1019246300.01.T03 | plastoglobulin-1, chloroplastic                                           |
| maker-3-augustus-gene-129.37-mRNA-1 | Japonica | NA       |               |              | OsR498G1019246900.01.T01 |                                                                           |
| maker-3-augustus-gene-129.39-mRNA-1 | Japonica | NA       |               |              | OsR498G1019247300.01.T02 | NADH dehydrogenase ubiquinone 1 beta subcomplex subunit 10-B              |
| maker-3-augustus-gene-129.41-mRNA-1 | Japonica | NA       |               | Os10g0575200 | OsR498G1019244400.01.T01 | DnaJ homolog subfamily C member 13                                        |
| maker-3-augustus-gene-129.45-mRNA-1 | Japonica | NA       |               | Os10g0575600 | OsR498G1019245800.01.T02 | Homeobox-leucine zipper protein ROC3                                      |
| maker-3-augustus-gene-129.47-mRNA-1 | Japonica | NA       |               | Os10g0575800 | OsR498G1019246600.01.T02 | ARM repeat superfamily protein isoform 2                                  |
| maker-3-augustus-gene-129.52-mRNA-1 | Japonica | NA       |               | Os10g0576600 | OsR498G1019249000.01.T01 | Tetratricopeptide repeat-containing domain                                |
| maker-3-augustus-gene-13.0-mRNA-1   | Japonica | Japonica |               | Os03g0126700 | OsR498G0305158100.01.T02 | Heavy metal-associated domain containing protein, expressed               |
| maker-3-augustus-gene-13.1-mRNA-1   | Japonica | Japonica |               | Os03g0126700 | OsR498G0305158100.01.T02 | Heavy metal-associated domain containing protein, expressed               |
| maker-3-augustus-gene-13.11-mRNA-1  | Japonica | NA       |               |              | OsR498G0305161700.01.T02 | Hydroxyproline-rich glycoprotein family protein                           |
| maker-3-augustus-gene-13.13-mRNA-1  | Japonica | Japonica |               | Os03g0126300 | OsR498G0305157800.01.T02 | C-terminal binding protein AN                                             |
| maker-3-augustus-gene-13.17-mRNA-1  | Japonica | Indica   | Kinase-TM     | Os11g0134300 | OsR498G0305158600.01.T04 | Non-specific serine/threonine protein kinase                              |
| maker-3-augustus-gene-13.23-mRNA-1  | Japonica | Indica   |               | Os03g0127000 | OsR498G0305159200.01.T05 | Cell growth defect factor 2                                               |
| maker-3-augustus-gene-13.26-mRNA-1  | Japonica | Japonica |               | Os03g0127200 | OsR498G1019087100.01.T01 | NAC domain class transcription factor                                     |
| maker-3-augustus-gene-13.28-mRNA-1  | Japonica | NA       |               | Os03g0127600 | OsR498G0305161400.01.T02 | FHA-transcription factor 1                                                |
| maker-3-augustus-gene-13.34-mRNA-1  | Japonica | NA       |               |              |                          | Potassium efflux antiporter                                               |
| maker-3-augustus-gene-13.40-mRNA-1  | Japonica | NA       |               |              | OsR498G0305163200.01.T04 | Callose synthase 3                                                        |
| maker-3-augustus-gene-13.6-mRNA-1   | Japonica | Japonica |               | Os03g0127500 | OsR498G0305161100.01.T01 | BZIP-type transcription factor (Fragment)                                 |
| maker-3-augustus-gene-13.9-mRNA-1   | Japonica | NA       | Kinase-LRR-TM | Os03g0127700 | OsR498G0305161700.01.T01 | Leucine-rich repeat transmembrane protein kinase, putative, expressed     |
| maker-3-augustus-gene-130.32-mRNA-1 | Japonica | NA       |               | Os10g0576900 | OsR498G1019249900.01.T01 | Cinnamoyl-CoA reductase-like protein SNL6                                 |
| maker-3-augustus-gene-130.34-mRNA-1 | Japonica | NA       |               |              |                          | Lysine-specific demethylase REF6                                          |
| maker-3-augustus-gene-130.37-mRNA-1 | Japonica | NA       |               | Os10g0577700 | OsR498G1019253500.01.T01 | CS domain-containing protein (Fragment)                                   |
| maker-3-augustus-gene-130.40-mRNA-1 | Japonica | NA       |               | Os10g0577900 | OsR498G1019253900.01.T07 | Glycerol-3-phosphate acyltransferase, chloroplastic                       |
| maker-3-augustus-gene-130.46-mRNA-1 | Japonica | NA       |               | Os10g0578000 | OsR498G1019254100.01.T01 | Hepatocyte growth factor-regulated tyrosine kinase substrate-like protein |
| maker-3-augustus-gene-130.48-mRNA-1 | Japonica | NA       |               | Os10g0577000 | OsR498G1019250200.01.T02 | RAP annotation release 2, NERD domain protein                             |

|                                      |          |          |           |              |                          |                                                                            |
|--------------------------------------|----------|----------|-----------|--------------|--------------------------|----------------------------------------------------------------------------|
| maker-3-augustus-gene-130.53-mRNA-1  | Japonica | NA       |           | Os10g0577400 | OsR498G1019251400.01.T01 | Chalcone-flavanone isomerase family protein, putative isoform 1            |
| maker-3-augustus-gene-130.55-mRNA-1  | Japonica | NA       |           | Os10g0577500 | OsR498G1019251600.01.T01 | Xyloglucan endotransglucosylase/hydrolase                                  |
| maker-3-augustus-gene-130.58-mRNA-1  | Japonica | NA       |           | Os10g0577800 | OsR498G1019253800.01.T01 | PARP catalytic domain-containing protein                                   |
| maker-3-augustus-gene-131.42-mRNA-1  | Japonica | NA       |           | Os10g0579400 | OsR498G1019256300.01.T02 | WRKY DNA binding domain containing protein, expressed                      |
| maker-3-augustus-gene-131.44-mRNA-1  | Japonica | NA       |           | Os10g0579600 | OsR498G1019256700.01.T01 | POT family protein, expressed                                              |
| maker-3-augustus-gene-131.49-mRNA-1  | Japonica | NA       |           | Os10g0579800 | OsR498G1019258300.01.T01 | POT family protein, expressed                                              |
| maker-3-augustus-gene-131.54-mRNA-1  | Japonica | NA       |           | Os10g0580200 | OsR498G1019259300.01.T05 | ADP-ribosylation factor B1B                                                |
| maker-3-augustus-gene-131.60-mRNA-1  | Japonica | NA       |           | Os10g0580400 | OsR498G1019260300.01.T01 | Urea-proton symporter like                                                 |
| maker-3-augustus-gene-131.62-mRNA-1  | Japonica | NA       |           | Os10g0578300 | OsR498G0102411000.01.T05 |                                                                            |
| maker-3-augustus-gene-131.64-mRNA-1  | Japonica | NA       |           |              |                          | LrgB-like family protein, expressed                                        |
| maker-3-augustus-gene-131.70-mRNA-1  | Japonica | NA       |           | Os10g0578900 | OsR498G1019255400.01.T01 | Phosphorylcholine transferase/cholinephosphate cytidyltransferase          |
| maker-3-augustus-gene-131.72-mRNA-1  | Japonica | NA       |           | Os10g0578950 | OsR498G1019255600.01.T01 | 4-coumarate--CoA ligase-like protein 6                                     |
| maker-3-augustus-gene-131.75-mRNA-1  | Japonica | NA       |           | Os10g0579100 | OsR498G1019255800.01.T01 | Calcium-dependent channel                                                  |
| maker-3-augustus-gene-131.80-mRNA-1  | Japonica | NA       |           | Os10g0579200 | OsR498G1019256000.01.T01 | D-xylose-proton symporter-like 2                                           |
| maker-3-augustus-gene-131.85-mRNA-1  | Japonica | NA       |           | Os10g0579300 | OsR498G1019256200.01.T02 | NADH dehydrogenase [ubiquinone] 1 alpha subcomplex subunit 12              |
| maker-3-augustus-gene-131.88-mRNA-1  | Japonica | NA       |           | Os10g0579500 | OsR498G1019256600.01.T01 | Ribosomal protein L35 containing protein, expressed                        |
| maker-3-augustus-gene-131.90-mRNA-1  | Japonica | NA       | Kinase-TM |              |                          | Cyclin-dependent kinase E                                                  |
| maker-3-augustus-gene-132.39-mRNA-1  | Japonica | NA       |           | Os10g0580700 | OsR498G1019262100.01.T01 | tankyrase                                                                  |
| maker-3-augustus-gene-132.41-mRNA-1  | Japonica | NA       |           | Os10g0580800 | OsR498G1019262500.01.T01 | ATP-dependent Clp protease proteolytic subunit                             |
| maker-3-augustus-gene-132.50-mRNA-1  | Japonica | NA       |           | Os10g0580500 | OsR498G1019260600.01.T03 | Essential protein Yae1 N-terminal                                          |
| maker-3-augustus-gene-132.52-mRNA-1  | Japonica | NA       |           | Os07g0633000 | OsR498G1019262000.01.T01 |                                                                            |
| maker-3-augustus-gene-132.54-mRNA-1  | Japonica | NA       |           | Os10g0580900 | OsR498G1019262800.01.T01 | Pseudouridine synthase, RsuA/RluB/C/D/E/F                                  |
| maker-3-augustus-gene-132.58-mRNA-1  | Japonica | NA       |           | Os10g0581000 | OsR498G1019263000.01.T04 |                                                                            |
| maker-3-augustus-gene-132.60-mRNA-1  | Japonica | NA       |           | Os04g0218600 | OsR498G1019263000.01.T06 | Expressed protein (Fragment)                                               |
| maker-3-augustus-gene-132.64-mRNA-1  | Japonica | NA       |           |              | OsR498G1019263400.01.T03 | Methyltransferase                                                          |
| maker-3-augustus-gene-132.67-mRNA-1  | Japonica | NA       |           |              | OsR498G1019264200.01.T05 | Glycosyltransferase-like KOBITO 1                                          |
| maker-3-augustus-gene-133.0-mRNA-1   | Japonica | NA       |           | Os10g0527400 | OsR498G1019075300.01.T01 | Glutathione S-transferase, N-terminal domain containing protein, expressed |
| maker-3-augustus-gene-133.2-mRNA-1   | Japonica | NA       |           | Os10g0527800 | OsR498G1019075900.01.T01 | Glutathione S-transferase, N-terminal domain containing protein, expressed |
| maker-3-augustus-gene-134.167-mRNA-1 | Japonica | NA       |           | Os10g0530400 | OsR498G1019083000.01.T01 | Glutathione-S-transferase Cla47                                            |
| maker-3-augustus-gene-134.68-mRNA-1  | Japonica | NA       |           | Os10g0528200 | OsR498G1019078900.01.T01 | Glutathione S-transferase, N-terminal domain containing protein, expressed |
| maker-3-augustus-gene-134.69-mRNA-1  | Japonica | NA       |           | Os10g0528300 | OsR498G1019079100.01.T01 | Glutathione S-transferase GSTU6                                            |
| maker-3-augustus-gene-134.70-mRNA-1  | Japonica | NA       |           | Os10g0529300 | OsR498G1019080300.01.T01 | Glutathione S-transferase, N-terminal domain containing protein, expressed |
| maker-3-augustus-gene-134.71-mRNA-1  | Japonica | NA       |           | Os10g0529700 | OsR498G1019080500.01.T01 | Glutathione S-transferase U16                                              |
| maker-3-augustus-gene-134.72-mRNA-1  | Japonica | NA       |           | Os10g0529500 | OsR498G1019080700.01.T01 | Glutathione S-transferase 1                                                |
| maker-3-augustus-gene-134.73-mRNA-1  | Japonica | NA       |           | Os10g0529700 | OsR498G1019080900.01.T01 | Glutathione S-transferase U16                                              |
| maker-3-augustus-gene-134.74-mRNA-1  | Japonica | NA       |           | Os10g0529800 | OsR498G1019081700.01.T01 | Glutathione S-transferase                                                  |
| maker-3-augustus-gene-134.75-mRNA-1  | Japonica | NA       |           | Os10g0529900 | OsR498G1019081700.01.T01 | Glutathione S-transferase (Fragment)                                       |
| maker-3-augustus-gene-134.76-mRNA-1  | Japonica | NA       |           | Os10g0530200 | OsR498G1019082500.01.T01 | Glutathione-S-transferase 2                                                |
| maker-3-augustus-gene-135.28-mRNA-1  | Japonica | NA       |           | Os10g0532100 | OsR498G1019087300.01.T01 | SWIRM domain-containing protein (Fragment)                                 |
| maker-3-augustus-gene-135.31-mRNA-1  | Japonica | NA       |           | Os10g0533000 | OsR498G1019091500.01.T04 | C-terminal binding protein AN                                              |
| maker-3-augustus-gene-135.36-mRNA-1  | Japonica | NA       |           | Os10g0533500 | OsR498G1019092700.01.T01 | Aldehyde oxygenase (deformylating)                                         |
| maker-3-augustus-gene-135.40-mRNA-1  | Japonica | NA       | Kinase    | Os10g0533600 | OsR498G1019094300.01.T01 | Mitogen-activated protein kinase                                           |
| maker-3-augustus-gene-135.42-mRNA-1  | Japonica | NA       |           | Os10g0532200 | OsR498G1019087800.01.T01 | Lysophospholipase BODYGUARD 3 like                                         |
| maker-3-augustus-gene-135.46-mRNA-1  | Japonica | Japonica | Kinase-TM | Os10g0533150 | OsR498G0305155100.01.T01 | Protein kinase domain containing protein, expressed                        |
| maker-3-augustus-gene-136.31-mRNA-1  | Japonica | NA       |           | Os10g0533900 | OsR498G1019094700.01.T02 | DUF862 domain-containing protein (Fragment)                                |
| maker-3-augustus-gene-136.34-mRNA-1  | Japonica | NA       |           |              | OsR498G1019097500.01.T01 |                                                                            |
| maker-3-augustus-gene-136.36-mRNA-1  | Japonica | NA       |           | Os10g0535800 | OsR498G1019100000.01.T01 |                                                                            |
| maker-3-augustus-gene-136.41-mRNA-1  | Japonica | NA       |           | Os01g0274500 | OsR498G1019099800.01.T01 | Expansin                                                                   |
| maker-3-augustus-gene-136.43-mRNA-1  | Japonica | NA       |           | Os10g0534100 | OsR498G1019095000.01.T02 |                                                                            |
| maker-3-augustus-gene-136.46-mRNA-1  | Japonica | NA       |           | Os10g0534400 | OsR498G1019095400.01.T01 | Putative membrane-associated kinase regulator 6                            |
| maker-3-augustus-gene-136.48-mRNA-1  | Japonica | NA       |           | Os10g0534700 | OsR498G1019096200.01.T01 | Beta-1,3-N-acetylglucosaminyltransferase lunatic fringe                    |
| maker-3-augustus-gene-136.50-mRNA-1  | Japonica | NA       |           | Os10g0534900 | OsR498G1019096600.01.T01 | Associated with HOX family protein, expressed                              |
| maker-3-augustus-gene-136.54-mRNA-1  | Japonica | NA       |           | Os10g0535600 | OsR498G1019100500.01.T01 | MENTAL domain-containing protein                                           |
| maker-3-augustus-gene-136.56-mRNA-1  | Japonica | NA       |           | Os10g0536000 | OsR498G1019099500.01.T01 | SUMO-conjugating protein SCE1                                              |
| maker-3-augustus-gene-137.32-mRNA-1  | Japonica | NA       |           | Os10g0536100 | OsR498G1019100900.01.T01 | MADS-box transcription factor                                              |
| maker-3-augustus-gene-137.35-mRNA-1  | Japonica | Indica   |           | Os03g0122300 | OsR498G1019102500.01.T01 | Flavanone 3-dioxygenase 2                                                  |
| maker-3-augustus-gene-137.40-mRNA-1  | Japonica | NA       |           | Os10g0536500 | OsR498G1019102900.01.T01 | Thylakoid membrane phosphoprotein 14 kDa                                   |
| maker-3-augustus-gene-137.44-mRNA-1  | Japonica | NA       |           | Os10g0536600 | OsR498G1019103100.01.T01 | Peroxidase                                                                 |
| maker-3-augustus-gene-137.46-mRNA-1  | Japonica | NA       |           | Os10g0536700 | OsR498G1019103900.01.T01 | Peroxidase                                                                 |
| maker-3-augustus-gene-137.48-mRNA-1  | Japonica | Indica   |           | Os03g0120400 | OsR498G1019105300.01.T01 | Heavy metal-associated isoprenylated plant protein 30                      |
| maker-3-augustus-gene-137.50-mRNA-1  | Japonica | NA       |           | Os10g0537500 | OsR498G1019105700.01.T01 | Tobamovirus multiplication protein like                                    |

|                                     |          |          |              |              |                          |                                                                               |
|-------------------------------------|----------|----------|--------------|--------------|--------------------------|-------------------------------------------------------------------------------|
| maker-3-augustus-gene-137.55-mRNA-1 | Japonica | NA       |              | Os10g0537300 | OsR498G1019105200.01.T01 |                                                                               |
| maker-3-augustus-gene-137.60-mRNA-1 | Japonica | NA       |              | Os10g0537600 | OsR498G1019106000.01.T03 | Putative P-loop containing nucleoside triphosphate hydrolase                  |
| maker-3-augustus-gene-138.0-mRNA-1  | Japonica | NA       | Kinase-TM    | Os10g0539600 | OsR498G1019112100.01.T04 | Calcium-dependent protein kinase isoform 1                                    |
| maker-3-augustus-gene-138.4-mRNA-1  | Japonica | NA       |              | Os10g0539900 | OsR498G1019114700.01.T01 | Monosaccharide-sensing protein 2                                              |
| maker-3-augustus-gene-139.34-mRNA-1 | Japonica | NA       |              |              | OsR498G1019117300.01.T03 |                                                                               |
| maker-3-augustus-gene-139.40-mRNA-1 | Japonica | NA       |              | Os10g0541200 | OsR498G1019118900.01.T01 | PPM-type phosphatase domain-containing protein                                |
| maker-3-augustus-gene-139.43-mRNA-1 | Japonica | NA       |              | Os10g0541000 | OsR498G1019118600.01.T03 |                                                                               |
| maker-3-augustus-gene-139.50-mRNA-1 | Japonica | NA       |              |              |                          | HTH myb-type domain-containing protein                                        |
| maker-3-augustus-gene-139.52-mRNA-1 | Japonica | NA       |              |              | OsR498G1019119800.01.T01 | Carboxypeptidase                                                              |
| maker-3-augustus-gene-14.0-mRNA-1   | Japonica | NA       | Kinase-TM    | Os03g0128700 | OsR498G0305164700.01.T02 | Calcium-dependent protein kinase                                              |
| maker-3-augustus-gene-14.15-mRNA-1  | Japonica | NA       |              | Os03g0128300 | OsR498G0305163600.01.T01 |                                                                               |
| maker-3-augustus-gene-14.17-mRNA-1  | Japonica | NA       |              | Os03g0128500 | OsR498G0305164000.01.T02 | DNA polymerase delta small subunit like                                       |
| maker-3-augustus-gene-14.22-mRNA-1  | Japonica | NA       |              | Os03g0128800 | OsR498G0305165000.01.T02 | Putative acetyl-ornithine/Acetyl-lysine deacetylase                           |
| maker-3-augustus-gene-14.24-mRNA-1  | Japonica | NA       |              | Os03g0129100 | OsR498G0305166000.01.T01 |                                                                               |
| maker-3-augustus-gene-14.29-mRNA-1  | Japonica | Indica   |              | Os03g0129200 | OsR498G0305166600.01.T03 | Exosome complex exonuclease RRP44 A                                           |
| maker-3-augustus-gene-14.34-mRNA-1  | Japonica | NA       |              | Os03g0129350 | OsR498G0305167400.01.T01 | Glycosyltransferase                                                           |
| maker-3-augustus-gene-14.37-mRNA-1  | Japonica | Japonica |              | Os03g0129800 | OsR498G0305167800.01.T01 | HTH myb-type domain-containing protein                                        |
| maker-3-augustus-gene-14.6-mRNA-1   | Japonica | NA       |              | Os03g0129000 | OsR498G0305165700.01.T04 | Phosphatidylinositol-glycan biosynthesis class F protein                      |
| maker-3-augustus-gene-140.0-mRNA-1  | Japonica | NA       |              | Os10g0542100 | OsR498G1019122100.01.T01 | EC protein III                                                                |
| maker-3-augustus-gene-140.10-mRNA-1 | Japonica | NA       |              | Os10g0542900 | OsR498G1019125300.01.T01 | Acidic endochitinase Q                                                        |
| maker-3-augustus-gene-140.15-mRNA-1 | Japonica | NA       |              | Os10g0543500 | OsR498G1019125700.01.T01 | Strictosidine synthase                                                        |
| maker-3-augustus-gene-140.18-mRNA-1 | Japonica | NA       |              | Os10g0544500 | OsR498G1019128500.01.T01 | DDB1-and CUL4-associated factor                                               |
| maker-3-augustus-gene-140.2-mRNA-1  | Japonica | NA       |              | Os10g0542400 | OsR498G1019123300.01.T01 |                                                                               |
| maker-3-augustus-gene-140.21-mRNA-1 | Japonica | NA       |              | Os10g0542200 | OsR498G1019122600.01.T02 | Ubiquitin family protein, expressed                                           |
| maker-3-augustus-gene-140.25-mRNA-1 | Japonica | NA       |              | Os10g0561800 | OsR498G1019126000.01.T01 | Homeobox-leucine zipper protein ATHB-4                                        |
| maker-3-augustus-gene-140.27-mRNA-1 | Japonica | NA       |              | Os10g0543800 | OsR498G1019126800.01.T01 | Glutathione transferase11                                                     |
| maker-3-augustus-gene-140.29-mRNA-1 | Japonica | NA       |              | Os10g0544200 | OsR498G1019128000.01.T01 | Transcription factor bHLH93 like                                              |
| maker-3-augustus-gene-140.5-mRNA-1  | Japonica | Indica   | Kinase-TM    | Os03g0132800 | OsR498G1019125100.01.T01 | Serine/threonine-protein kinase BSK1-2                                        |
| maker-3-augustus-gene-141.40-mRNA-1 | Japonica | NA       |              | Os10g0544600 | OsR498G1019131100.01.T02 | NEP1-interacting protein 1 isoform A                                          |
| maker-3-augustus-gene-141.43-mRNA-1 | Japonica | NA       |              | Os10g0544900 | OsR498G1019131700.01.T01 | Protein-serine/threonine phosphatase                                          |
| maker-3-augustus-gene-141.46-mRNA-1 | Japonica | NA       |              | Os10g0545100 | OsR498G1019132300.01.T01 | Vacuolar acid trehalase                                                       |
| maker-3-augustus-gene-141.51-mRNA-1 | Japonica | NA       |              | Os10g0545200 | OsR498G1019133100.01.T01 | Aldehyde oxygenase (deformylating)                                            |
| maker-3-augustus-gene-141.54-mRNA-1 | Japonica | NA       |              | Os10g0545500 | OsR498G1019133700.01.T01 | Xyloglucan endotransglucosylase/hydrolase                                     |
| maker-3-augustus-gene-141.57-mRNA-1 | Japonica | NA       |              | Os10g0545700 | OsR498G1019134100.01.T01 | Rhodanese domain-containing protein (Fragment)                                |
| maker-3-augustus-gene-141.60-mRNA-1 | Japonica | NA       |              | Os10g0546100 | OsR498G1019134900.01.T01 | Pistil-specific extensin-like protein                                         |
| maker-3-augustus-gene-141.62-mRNA-1 | Japonica | NA       |              |              |                          | UDP-Glycosyltransferase superfamily protein                                   |
| maker-3-augustus-gene-141.68-mRNA-1 | Japonica | NA       |              | Os10g0546300 | OsR498G1019135500.01.T03 | Syndetin like                                                                 |
| maker-3-augustus-gene-141.72-mRNA-1 | Japonica | NA       |              | Os10g0545000 | OsR498G1019132200.01.T01 | Magnesium transporter                                                         |
| maker-3-augustus-gene-141.76-mRNA-1 | Japonica | NA       |              | Os10g0545300 | OsR498G1019133400.01.T01 | Coiled-coil domain-containing protein 90B                                     |
| maker-3-augustus-gene-141.78-mRNA-1 | Japonica | NA       |              |              | OsR498G1019134000.01.T01 | E3 ubiquitin-protein ligase RFWD3                                             |
| maker-3-augustus-gene-142.0-mRNA-1  | Japonica | NA       |              | Os10g0546600 | OsR498G1019136700.01.T06 | Carotene epsilon-ring hydroxylase                                             |
| maker-3-augustus-gene-142.12-mRNA-1 | Japonica | NA       |              |              |                          | Oxidoreductase, short chain dehydrogenase/reductase family protein, expressed |
| maker-3-augustus-gene-142.15-mRNA-1 | Japonica | NA       |              | Os10g0548000 | OsR498G1019139800.01.T03 | Oxidoreductase, short chain dehydrogenase/reductase family protein, expressed |
| maker-3-augustus-gene-142.18-mRNA-1 | Japonica | NA       |              | Os10g0548000 | OsR498G1019140000.01.T05 | Short-chain dehydrogenase TIC 32 chloroplastic                                |
| maker-3-augustus-gene-142.23-mRNA-1 | Japonica | NA       |              |              |                          | Putative UDP-N-acetylglucosamine--peptide N-acetylglucosaminyltransferase     |
| maker-3-augustus-gene-142.4-mRNA-1  | Japonica | NA       |              | Os10g0547500 | OsR498G1019138700.01.T02 | Silicon efflux transporter                                                    |
| maker-3-augustus-gene-142.6-mRNA-1  | Japonica | NA       |              | Os10g0548600 | OsR498G1019140700.01.T01 | Beta-expansin                                                                 |
| maker-3-augustus-gene-142.8-mRNA-1  | Japonica | NA       |              | Os10g0547000 | OsR498G1019137800.01.T01 | C2 NT-type domain-containing protein                                          |
| maker-3-augustus-gene-143.39-mRNA-1 | Japonica | NA       |              | Os05g0558400 | OsR498G1019142700.01.T04 | Branched-chain-amino-acid aminotransferase                                    |
| maker-3-augustus-gene-143.40-mRNA-1 | Japonica | NA       |              | Os05g0558400 | OsR498G1019142700.01.T02 | Branched-chain-amino-acid aminotransferase                                    |
| maker-3-augustus-gene-143.56-mRNA-1 | Japonica | NA       |              | Os10g0549850 | OsR498G1019143900.01.T01 |                                                                               |
| maker-3-augustus-gene-143.57-mRNA-1 | Japonica | NA       |              | Os10g0549850 |                          |                                                                               |
| maker-3-augustus-gene-143.72-mRNA-1 | Japonica | NA       | CC-Kinase-TM | Os10g0548700 | OsR498G1019141000.01.T03 | E3 ubiquitin ligase                                                           |
| maker-3-augustus-gene-143.78-mRNA-1 | Japonica | NA       |              | Os10g0548850 | OsR498G1019141800.01.T01 | E3 ubiquitin ligase                                                           |
| maker-3-augustus-gene-143.82-mRNA-1 | Japonica | NA       |              | Os10g0548900 | OsR498G1019142000.01.T03 | UDP-N-acetylmuramoyl-L-alanyl-D-glutamate--2,6-diaminopimelate ligase M       |
| maker-3-augustus-gene-143.85-mRNA-1 | Japonica | NA       |              | Os10g0549100 | OsR498G1019142200.01.T01 | Vesicle-associated protein 2-1                                                |
| maker-3-augustus-gene-143.86-mRNA-1 | Japonica | NA       |              |              |                          | Vesicle-associated protein 2-1                                                |
| maker-3-augustus-gene-144.46-mRNA-1 | Japonica | Indica   |              | Os03g0105800 | OsR498G1019147700.01.T04 | PPC domain-containing protein                                                 |
| maker-3-augustus-gene-144.50-mRNA-1 | Japonica | NA       |              | Os10g0551600 | OsR498G1019151700.01.T03 | NADH dehydrogenase [ubiquinone] 1 beta subcomplex subunit 8 mitochond         |
| maker-3-augustus-gene-144.54-mRNA-1 | Japonica | NA       |              | Os10g0550300 | OsR498G1019146000.01.T01 | Plant specific Rop nucleotide exchanger , PRONE                               |
| maker-3-augustus-gene-144.56-mRNA-1 | Japonica | NA       |              |              | OsR498G1019147200.01.T02 | Pectin acetylsterase                                                          |

|                                     |          |          |               |              |                          |                                                                           |
|-------------------------------------|----------|----------|---------------|--------------|--------------------------|---------------------------------------------------------------------------|
| maker-3-augustus-gene-144.60-mRNA-1 | Japonica | NA       |               |              | OsR498G1222155600.01.T01 | UDP-glucose-fructose-phosphate glucosyltransferase                        |
| maker-3-augustus-gene-145.40-mRNA-1 | Japonica | NA       |               | Os10g0552400 | OsR498G1019155100.01.T01 | E3 ubiquitin ligase                                                       |
| maker-3-augustus-gene-145.43-mRNA-1 | Japonica | NA       |               | Os10g0553900 | OsR498G1019160100.01.T02 |                                                                           |
| maker-3-augustus-gene-145.45-mRNA-1 | Japonica | NA       |               |              | OsR498G1019161700.01.T03 | Oxysterol-binding protein-related protein 2A                              |
| maker-3-augustus-gene-145.52-mRNA-1 | Japonica | NA       |               | Os10g0552900 | OsR498G1019158000.01.T02 | 3-hydroxyisobutyryl-CoA hydrolase, mitochondrial                          |
| maker-3-augustus-gene-145.57-mRNA-1 | Japonica | NA       |               | Os10g0553300 | OsR498G1019158200.01.T01 | Trehalose 6-phosphate phosphatase                                         |
| maker-3-augustus-gene-145.60-mRNA-1 | Japonica | NA       |               | Os10g0553800 | OsR498G1019159800.01.T05 | Flavin-containing monooxygenase                                           |
| maker-3-augustus-gene-145.64-mRNA-1 | Japonica | NA       |               | Os10g0554200 | OsR498G1019162400.01.T01 | Nitrate/chlorate transporter, putative, expressed                         |
| maker-3-augustus-gene-146.0-mRNA-1  | Japonica | NA       |               | Os10g0555100 | OsR498G1019166100.01.T01 | Glucuronosyltransferase                                                   |
| maker-3-augustus-gene-146.10-mRNA-1 | Japonica | NA       |               | Os10g0554900 | OsR498G1019164800.01.T01 | QWRF motif-containing protein 7                                           |
| maker-3-augustus-gene-146.13-mRNA-1 | Japonica | NA       |               | Os10g0555200 | OsR498G1019166400.01.T01 | YqgFc domain-containing protein (Fragment)                                |
| maker-3-augustus-gene-146.7-mRNA-1  | Japonica | NA       |               | Os10g0554300 | OsR498G1019163600.01.T02 | Flavin-containing monooxygenase                                           |
| maker-3-augustus-gene-148.9-mRNA-1  | Japonica | NA       |               | Os03g0323800 | OsR498G0305852100.01.T02 | Mitochondrial import receptor subunit TOM40-1, N-terminally processed lik |
| maker-3-augustus-gene-149.33-mRNA-1 | Japonica | NA       |               | Os03g0325200 |                          |                                                                           |
| maker-3-augustus-gene-149.35-mRNA-1 | Japonica | NA       |               | Os03g0325500 | OsR498G0305857300.01.T01 | HTH myb-type domain-containing protein                                    |
| maker-3-augustus-gene-149.39-mRNA-1 | Japonica | NA       |               |              | OsR498G0305859300.01.T01 | QXW lectin repeat family protein                                          |
| maker-3-augustus-gene-149.44-mRNA-1 | Japonica | NA       |               | Os03g0324800 | OsR498G0305855200.01.T01 |                                                                           |
| maker-3-augustus-gene-149.48-mRNA-1 | Japonica | Japonica |               | Os03g0325000 | OsR498G0305856200.01.T01 | Pyruvate kinase                                                           |
| maker-3-augustus-gene-149.51-mRNA-1 | Japonica | NA       |               | Os03g0325300 |                          | Transposon protein, putative, Mutator sub-class                           |
| maker-3-augustus-gene-149.54-mRNA-1 | Japonica | NA       |               |              |                          |                                                                           |
| maker-3-augustus-gene-149.56-mRNA-1 | Japonica | Indica   |               | Os01g0277600 | OsR498G0305859800.01.T01 | Phospholipid-transporting ATPase                                          |
| maker-3-augustus-gene-149.60-mRNA-1 | Japonica | NA       |               | Os03g0326200 | OsR498G0305860200.01.T01 | Phospholipid-transporting ATPase                                          |
| maker-3-augustus-gene-149.62-mRNA-1 | Japonica | NA       |               | Os03g0326300 | OsR498G0305861000.01.T03 | RING/U-box superfamily protein, putative isoform 1                        |
| maker-3-augustus-gene-15.0-mRNA-1   | Japonica | NA       |               | Os03g0130100 | OsR498G0305169100.01.T01 | Benzoate--CoA ligase, peroxisomal                                         |
| maker-3-augustus-gene-15.13-mRNA-1  | Japonica | NA       | Kinase-TM     | Os03g0130900 | OsR498G0305172900.01.T01 | Putative serine/threonine-protein kinase PBL21                            |
| maker-3-augustus-gene-15.2-mRNA-1   | Japonica | NA       |               | Os03g0130300 | OsR498G0305170100.01.T01 | Gamma-thionin/defensin                                                    |
| maker-3-augustus-gene-15.20-mRNA-1  | Japonica | NA       |               |              | OsR498G0305169600.01.T01 |                                                                           |
| maker-3-augustus-gene-15.21-mRNA-1  | Japonica | NA       |               | Os03g0130500 | OsR498G0305170800.01.T01 | EF hand family protein, expressed                                         |
| maker-3-augustus-gene-15.27-mRNA-1  | Japonica | NA       |               | Os03g0130700 | OsR498G0305172000.01.T02 | AAA domain-containing protein                                             |
| maker-3-augustus-gene-15.31-mRNA-1  | Japonica | NA       |               | Os03g0131100 | OsR498G0305173400.01.T05 | Truncated nodule inception protein                                        |
| maker-3-augustus-gene-15.34-mRNA-1  | Japonica | NA       |               | Os03g0131200 | OsR498G0305175000.01.T01 | Chloroplast catalase                                                      |
| maker-3-augustus-gene-15.37-mRNA-1  | Japonica | NA       |               | Os03g0131300 | OsR498G0305175200.01.T03 | Ubiquitin family protein, expressed                                       |
| maker-3-augustus-gene-15.4-mRNA-1   | Japonica | NA       |               | Os03g0130400 | OsR498G0305170500.01.T01 | Adenylate kinase                                                          |
| maker-3-augustus-gene-15.7-mRNA-1   | Japonica | NA       |               | Os03g0130800 | OsR498G0305172300.01.T01 | Bromo domain-containing protein (Fragment)                                |
| maker-3-augustus-gene-150.32-mRNA-1 | Japonica | NA       |               |              | OsR498G0305870500.01.T02 | Guanine nucleotide exchange factor SPIKE 1                                |
| maker-3-augustus-gene-150.38-mRNA-1 | Japonica | Indica   |               | Os07g0684100 | OsR498G0305862400.01.T01 | Thioredoxin-like 1-1 chloroplastic                                        |
| maker-3-augustus-gene-150.43-mRNA-1 | Japonica | NA       |               | Os03g0326600 | OsR498G0305862600.01.T03 | U11/U12 small nuclear ribonucleoprotein 65 kDa protein isoform X1         |
| maker-3-augustus-gene-150.47-mRNA-1 | Japonica | NA       |               | Os03g0327100 | OsR498G0305863600.01.T01 | NAC transcription factor                                                  |
| maker-3-augustus-gene-150.49-mRNA-1 | Japonica | NA       |               | Os03g0327600 | OsR498G0305865600.01.T01 | Hydroxyproline-rich glycoprotein family protein                           |
| maker-3-augustus-gene-150.52-mRNA-1 | Japonica | NA       |               |              | OsR498G0305867600.01.T01 | NAC domain transcription factor                                           |
| maker-3-augustus-gene-151.0-mRNA-1  | Japonica | NA       |               |              | OsR498G0305871300.01.T01 | GOLD domain-containing protein                                            |
| maker-3-augustus-gene-151.10-mRNA-1 | Japonica | NA       |               | Os03g0328100 | OsR498G0305870800.01.T01 | O-fucosyltransferase family protein (Fragment)                            |
| maker-3-augustus-gene-151.16-mRNA-1 | Japonica | Indica   |               | Os07g0682800 | OsR498G0305871600.01.T01 | Apyrase                                                                   |
| maker-3-augustus-gene-151.2-mRNA-1  | Japonica | NA       |               | Os03g0328900 | OsR498G0305873500.01.T02 | Zinc finger CCCH domain-containing protein 22                             |
| maker-3-augustus-gene-151.5-mRNA-1  | Japonica | NA       |               | Os03g0329200 | OsR498G0305874500.01.T04 | Zinc finger CCCH domain-containing protein 53                             |
| maker-3-augustus-gene-152.0-mRNA-1  | Japonica | NA       | Kinase-LRR-TM |              | OsR498G0305877700.01.T01 | probable leucine-rich repeat receptor-like protein kinase At5g49770       |
| maker-3-augustus-gene-152.16-mRNA-1 | Japonica | NA       |               | Os03g0329500 | OsR498G0305876600.01.T01 | Endoglucanase                                                             |
| maker-3-augustus-gene-152.20-mRNA-1 | Japonica | NA       |               | Os03g0330000 | OsR498G0305878200.01.T01 | Hexosyltransferase                                                        |
| maker-3-augustus-gene-152.23-mRNA-1 | Japonica | NA       |               | Os03g0330300 | OsR498G0305879600.01.T02 | Serine/arginine repetitive matrix protein 1-like                          |
| maker-3-augustus-gene-152.30-mRNA-1 | Japonica | NA       |               | Os02g0791200 | OsR498G0408232100.01.T01 | Probable E3 ubiquitin-protein ligase XBOS32                               |
| maker-3-augustus-gene-152.5-mRNA-1  | Japonica | NA       |               | Os03g0329900 | OsR498G0305877900.01.T01 | HTH myb-type domain-containing protein                                    |
| maker-3-augustus-gene-152.9-mRNA-1  | Japonica | NA       |               | Os03g0330200 | OsR498G0305879300.01.T01 | 2,3-bisphosphoglycerate-independent phosphoglycerate mutase               |
| maker-3-augustus-gene-153.0-mRNA-1  | Japonica | Indica   |               | Os03g0331600 | OsR498G0305882100.01.T01 | Pheophorbide a oxygenase family protein                                   |
| maker-3-augustus-gene-153.13-mRNA-1 | Japonica | NA       |               | Os03g0332000 | OsR498G0305884200.01.T02 | Secologanin synthase                                                      |
| maker-3-augustus-gene-153.16-mRNA-1 | Japonica | NA       |               | Os03g0332100 | OsR498G0305884210.01.T01 | Secologanin synthase                                                      |
| maker-3-augustus-gene-153.18-mRNA-1 | Japonica | NA       |               | Os03g0332400 | OsR498G0305886000.01.T02 | Metallo-hydrolase/oxidoreductase superfamily protein (Fragment)           |
| maker-3-augustus-gene-153.23-mRNA-1 | Japonica | Indica   |               | Os11g0220800 | OsR498G0305886400.01.T01 | 60S ribosomal protein L10 isoform B                                       |
| maker-3-augustus-gene-153.25-mRNA-1 | Japonica | Indica   |               | Os07g0681200 | OsR498G0305886600.01.T01 | HAD superfamily subfamily IIIB acid phosphatase                           |
| maker-3-augustus-gene-153.28-mRNA-1 | Japonica | NA       |               | Os03g0332700 | OsR498G0305886800.01.T02 | ABC transporter ATPase component                                          |
| maker-3-augustus-gene-153.3-mRNA-1  | Japonica | NA       |               |              |                          | Bromo domain-containing protein (Fragment)                                |
| maker-3-augustus-gene-153.33-mRNA-1 | Japonica | NA       |               | Os03g0333000 | OsR498G0305887800.01.T02 |                                                                           |



|                                     |          |          |               |              |                          |                                                             |
|-------------------------------------|----------|----------|---------------|--------------|--------------------------|-------------------------------------------------------------|
| maker-3-augustus-gene-153.7-mRNA-1  | Japonica | NA       |               | Os03g0333100 | OsR498G0305887900.01.T02 | Bms1-type G domain-containing protein                       |
| maker-3-augustus-gene-154.10-mRNA-1 | Japonica | NA       |               | Os03g0334200 | OsR498G0305891500.01.T02 |                                                             |
| maker-3-augustus-gene-154.12-mRNA-1 | Japonica | NA       |               | Os08g0389800 | OsR498G0305892300.01.T01 | Protein DETOXIFICATION                                      |
| maker-3-augustus-gene-154.14-mRNA-1 | Japonica | Indica   |               | Os03g0334700 | OsR498G0305893500.01.T05 | Phospholipid-transporting ATPase                            |
| maker-3-augustus-gene-154.17-mRNA-1 | Japonica | Japonica |               | Os03g0335200 | OsR498G0305894900.01.T01 | WRKY transcription factor 47                                |
| maker-3-augustus-gene-154.19-mRNA-1 | Japonica | Japonica |               | Os03g0333800 | OsR498G0305890200.01.T01 | DUF1618 domain-containing protein (Fragment)                |
| maker-3-augustus-gene-154.23-mRNA-1 | Japonica | NA       | Kinase        | Os03g0334000 | OsR498G0305890800.01.T02 | Non-specific serine/threonine protein kinase                |
| maker-3-augustus-gene-154.26-mRNA-1 | Japonica | NA       |               | Os03g0334800 | OsR498G0305893800.01.T01 | Lung seven transmembrane receptor family protein, expressed |
| maker-3-augustus-gene-154.5-mRNA-1  | Japonica | Indica   |               | Os03g0334100 | OsR498G0305891300.01.T02 | PRC domain-containing protein (Fragment)                    |
| maker-3-augustus-gene-155.32-mRNA-1 | Japonica | NA       |               | Os03g0335300 | OsR498G0305895300.01.T01 | Vacuolar-sorting receptor 1                                 |
| maker-3-augustus-gene-155.37-mRNA-1 | Japonica | NA       | Kinase-LRR-TM | Os03g0335500 | OsR498G0305895900.01.T01 | Mitogen-activated protein kinase kinase kinase              |
| maker-3-augustus-gene-155.39-mRNA-1 | Japonica | NA       |               | Os03g0336200 | OsR498G0305898100.01.T02 | BZIP-type transcription factor (Fragment)                   |
| maker-3-augustus-gene-155.43-mRNA-1 | Japonica | NA       |               | Os03g0336300 | OsR498G0305898300.01.T01 | Nardilysin                                                  |
| maker-3-augustus-gene-155.49-mRNA-1 | Japonica | NA       |               | Os03g0336500 | OsR498G0305899100.01.T01 | Macro domain                                                |
| maker-3-augustus-gene-155.53-mRNA-1 | Japonica | NA       |               |              |                          | Nucleotidyltransferase domain containing protein, expressed |
| maker-3-augustus-gene-155.57-mRNA-1 | Japonica | Indica   |               | Os03g0694900 | OsR498G0305896800.01.T05 | Valyl-tRNA synthetase                                       |
| maker-3-augustus-gene-155.63-mRNA-1 | Japonica | NA       |               |              | OsR498G0305897800.01.T01 | Vicilin-like seed storage protein                           |
| maker-3-augustus-gene-155.65-mRNA-1 | Japonica | NA       |               | Os03g0336600 | OsR498G0305899400.01.T01 | Reticulon-like protein (Fragment)                           |
| maker-3-augustus-gene-156.0-mRNA-1  | Japonica | Indica   |               | Os07g0679000 | OsR498G0305903100.01.T06 | Potassium transporter                                       |
| maker-3-augustus-gene-156.10-mRNA-1 | Japonica | NA       |               | Os03g0338400 | OsR498G0305906500.01.T01 | BHLH transcription factor                                   |
| maker-3-augustus-gene-156.20-mRNA-1 | Japonica | NA       |               | Os03g0337700 | OsR498G0305903600.01.T01 | GNP-loop GTPase 3                                           |
| maker-3-augustus-gene-156.28-mRNA-1 | Japonica | NA       |               | Os03g0337800 | OsR498G0305903800.01.T01 | Ribosomal protein L19                                       |
| maker-3-augustus-gene-156.33-mRNA-1 | Japonica | NA       |               |              | OsR498G0305904000.01.T01 | Fumarate hydratase                                          |
| maker-3-augustus-gene-156.40-mRNA-1 | Japonica | NA       |               | Os03g0338000 | OsR498G0305904400.01.T01 | Aminotransferase class-III                                  |
| maker-3-augustus-gene-156.42-mRNA-1 | Japonica | NA       |               | Os03g0338600 | OsR498G0305907000.01.T02 | tRNA pseudouridine synthase                                 |
| maker-3-augustus-gene-156.6-mRNA-1  | Japonica | NA       |               | Os03g0337600 | OsR498G0305903300.01.T01 | Uroporphyrinogen decarboxylase                              |
| maker-3-augustus-gene-157.35-mRNA-1 | Japonica | NA       |               | Os03g0339300 | OsR498G0305908500.01.T01 | Peroxidase                                                  |
| maker-3-augustus-gene-157.37-mRNA-1 | Japonica | NA       |               | Os03g0339700 | OsR498G0305910100.01.T01 | DUF827 domain-containing protein (Fragment)                 |
| maker-3-augustus-gene-157.39-mRNA-1 | Japonica | NA       |               | Os03g0340600 |                          |                                                             |
| maker-3-augustus-gene-157.41-mRNA-1 | Japonica | NA       |               | Os03g0340700 | OsR498G0305916700.01.T01 | Sperm-associated antigen 1                                  |
| maker-3-augustus-gene-157.43-mRNA-1 | Japonica | NA       |               | Os03g0340900 | OsR498G0305916900.01.T03 | GTP diphosphokinase                                         |
| maker-3-augustus-gene-157.51-mRNA-1 | Japonica | Indica   |               | Os07g0677600 | OsR498G0305908800.01.T01 | Peroxidase                                                  |
| maker-3-augustus-gene-157.57-mRNA-1 | Japonica | NA       |               | Os03g0340500 | OsR498G0305915600.01.T02 | Sucrose synthase                                            |
| maker-3-augustus-gene-157.64-mRNA-1 | Japonica | NA       |               |              | OsR498G0101949000.01.T02 |                                                             |
| maker-3-augustus-gene-158.44-mRNA-1 | Japonica | NA       |               | Os03g0341000 | OsR498G0305918100.01.T01 | Ethylene-responsive transcription factor RAP2-3             |
| maker-3-augustus-gene-158.46-mRNA-1 | Japonica | NA       |               | Os03g0341300 | OsR498G0305919100.01.T04 | Bidirectional sugar transporter SWEET                       |
| maker-3-augustus-gene-158.62-mRNA-1 | Japonica | NA       |               | Os03g0341100 | OsR498G0305918400.01.T01 | 60S ribosomal protein L18                                   |
| maker-3-augustus-gene-158.67-mRNA-1 | Japonica | NA       |               | Os03g0341200 | OsR498G0305918600.01.T02 | Fanconi anemia group I protein homolog                      |
| maker-3-augustus-gene-158.72-mRNA-1 | Japonica | NA       |               | Os03g0341600 | OsR498G0305920400.01.T02 | Phylloplanin-like                                           |
| maker-3-augustus-gene-158.74-mRNA-1 | Japonica | NA       |               | Os03g0342100 | OsR498G0305920600.01.T01 |                                                             |
| maker-3-augustus-gene-158.76-mRNA-1 | Japonica | Indica   |               | Os03g0342900 | OsR498G0305921800.01.T05 | Dormancy/auxin associated protein, expressed                |
| maker-3-augustus-gene-16.48-mRNA-1  | Japonica | NA       |               | Os03g0131500 | OsR498G0305175500.01.T01 | Thiol-disulfide oxidoreductase LTO1                         |
| maker-3-augustus-gene-16.51-mRNA-1  | Japonica | Indica   |               | Os04g0561600 | OsR498G0305175900.01.T01 | Coiled-coil domain-containing protein 124                   |
| maker-3-augustus-gene-16.53-mRNA-1  | Japonica | NA       |               | Os03g0132000 | OsR498G0305176700.01.T01 | 4-coumarate--CoA ligase-like 4                              |
| maker-3-augustus-gene-16.75-mRNA-1  | Japonica | NA       |               | Os03g0131400 | OsR498G0305175400.01.T01 | Polynucleotide adenylyltransferase family protein           |
| maker-3-augustus-gene-160.40-mRNA-1 | Japonica | NA       |               |              | OsR498G0305931400.01.T02 | HMA domain-containing protein (Fragment)                    |
| maker-3-augustus-gene-162.5-mRNA-1  | Japonica | NA       | CSD1          | Os03g0351500 | OsR498G0305951300.01.T01 | Superoxide dismutase                                        |
| maker-3-augustus-gene-163.36-mRNA-1 | Japonica | NA       |               | Os03g0352200 | OsR498G0305954100.01.T05 | SAC3 family protein C                                       |
| maker-3-augustus-gene-163.40-mRNA-1 | Japonica | NA       |               | Os03g0352400 | OsR498G0305954500.01.T01 | Nuclear/nucleolar GTPase 2                                  |
| maker-3-augustus-gene-163.45-mRNA-1 | Japonica | NA       |               |              | OsR498G0305955100.01.T01 | Chromatin-remodeling ATPase INO80                           |
| maker-3-augustus-gene-163.52-mRNA-1 | Japonica | NA       |               | Os03g0353000 | OsR498G0305955900.01.T01 |                                                             |
| maker-3-augustus-gene-163.54-mRNA-1 | Japonica | Indica   |               | Os12g0594700 | OsR498G0305956300.01.T01 | F-box domain containing protein, expressed                  |
| maker-3-augustus-gene-163.56-mRNA-1 | Japonica | Japonica |               | Os03g0353400 | OsR498G0305957500.01.T02 | EARLY responsive TO dehydration protein, putative           |
| maker-3-augustus-gene-163.59-mRNA-1 | Japonica | NA       |               | Os03g0353500 | OsR498G0305957900.01.T01 | ribosomal RNA-processing protein 17                         |
| maker-3-augustus-gene-163.61-mRNA-1 | Japonica | NA       |               | Os03g0352300 | OsR498G0305954400.01.T01 | Nop domain-containing protein                               |
| maker-3-augustus-gene-163.67-mRNA-1 | Japonica | NA       |               | Os03g0352800 | OsR498G0305955800.01.T01 | Acyl carrier protein 2, mitochondrial                       |
| maker-3-augustus-gene-164.0-mRNA-1  | Japonica | NA       |               |              | OsR498G0305958300.01.T04 | Aberrant pollen transmission1                               |
| maker-3-augustus-gene-164.10-mRNA-1 | Japonica | NA       |               | Os03g0353900 | OsR498G0305959300.01.T04 | ArgoN domain-containing protein                             |
| maker-3-augustus-gene-165.28-mRNA-1 | Japonica | NA       |               | Os05g0267732 | OsR498G0203607000.01.T01 |                                                             |
| maker-3-augustus-gene-169.36-mRNA-1 | Japonica | NA       |               |              | OsR498G0305965900.01.T01 | U4/U6 small nuclear ribonucleoprotein Prp4                  |
| maker-3-augustus-gene-169.39-mRNA-1 | Japonica | Japonica |               | Os03g0355700 | OsR498G0305967300.01.T01 | IQ-domain 11                                                |

|                                     |          |          |           |              |                          |                                                                             |
|-------------------------------------|----------|----------|-----------|--------------|--------------------------|-----------------------------------------------------------------------------|
| maker-3-augustus-gene-169.41-mRNA-1 | Japonica | NA       |           | Os03g0355600 | OsR498G0305966400.01.T02 | Beta-adaptin-like protein C                                                 |
| maker-3-augustus-gene-169.46-mRNA-1 | Japonica | NA       |           | Os03g0355800 | OsR498G0305967800.01.T01 | Diphthine methyl ester synthase                                             |
| maker-3-augustus-gene-169.49-mRNA-1 | Japonica | NA       |           | Os03g0355900 | OsR498G0305968000.01.T01 | Sanguinarine reductase                                                      |
| maker-3-augustus-gene-169.54-mRNA-1 | Japonica | NA       |           | Os03g0356300 | OsR498G0305969000.01.T01 | 50S ribosomal protein L6 chloroplastic                                      |
| maker-3-augustus-gene-169.56-mRNA-1 | Japonica | NA       |           | Os03g0356414 | OsR498G0305969400.01.T01 | RING-type E3 ubiquitin transferase                                          |
| maker-3-augustus-gene-169.58-mRNA-1 | Japonica | NA       |           | Os03g0356470 |                          |                                                                             |
| maker-3-augustus-gene-169.63-mRNA-1 | Japonica | NA       |           | Os03g0356484 | OsR498G0305971000.01.T02 | Mitochondria fission 1 protein (Fragment)                                   |
| maker-3-augustus-gene-17.43-mRNA-1  | Japonica | NA       |           |              |                          | IQ-domain 20                                                                |
| maker-3-augustus-gene-17.45-mRNA-1  | Japonica | NA       |           | Os03g0134900 | OsR498G0305185200.01.T01 | Glutathione S-transferase, N-terminal domain containing protein, expressed  |
| maker-3-augustus-gene-17.47-mRNA-1  | Japonica | NA       |           | Os03g0135100 | OsR498G0305185800.01.T01 | Glutathione transferase                                                     |
| maker-3-augustus-gene-17.50-mRNA-1  | Japonica | Indica   |           | Os03g0135200 | OsR498G0305186000.01.T01 | Glutathione transferase                                                     |
| maker-3-augustus-gene-17.53-mRNA-1  | Japonica | NA       |           | Os03g0135300 | OsR498G0305186200.01.T01 | Glutathione transferase                                                     |
| maker-3-augustus-gene-17.55-mRNA-1  | Japonica | NA       |           | Os03g0135400 | OsR498G0305186800.01.T01 | F-box/LRR-repeat protein 10                                                 |
| maker-3-augustus-gene-17.57-mRNA-1  | Japonica | Indica   |           | Os03g0135600 | OsR498G0305187200.01.T09 | Ankyrin repeat domain-containing protein chloroplastic                      |
| maker-3-augustus-gene-17.61-mRNA-1  | Japonica | Japonica | RAI1      | Os03g0135700 | OsR498G0305187800.01.T01 | BHLH transcription factor                                                   |
| maker-3-augustus-gene-170.27-mRNA-1 | Japonica | NA       |           |              |                          | Hydrolase, putative, expressed                                              |
| maker-3-augustus-gene-170.30-mRNA-1 | Japonica | NA       |           | Os03g0356582 | OsR498G0305973900.01.T01 | Phosphatidylinositol 4-phosphate 5-kinase                                   |
| maker-3-augustus-gene-170.33-mRNA-1 | Japonica | Japonica |           | Os03g0356596 | OsR498G0714888800.01.T01 | Phosphatidylinositol 4-phosphate 5-kinase                                   |
| maker-3-augustus-gene-170.35-mRNA-1 | Japonica | NA       |           |              | OsR498G0305976300.01.T01 | F-box domain containing protein, expressed                                  |
| maker-3-augustus-gene-170.37-mRNA-1 | Japonica | NA       |           |              | OsR498G0409243500.01.T01 | HTH myb-type domain-containing protein                                      |
| maker-3-augustus-gene-170.39-mRNA-1 | Japonica | NA       |           | Os03g0356638 | OsR498G0305974800.01.T02 | Pleckstrin domain-containing protein, putative, expressed                   |
| maker-3-augustus-gene-170.47-mRNA-1 | Japonica | NA       |           |              | OsR498G0305975400.01.T06 | TRAF-type zinc finger domain-containing protein 1                           |
| maker-3-augustus-gene-171.0-mRNA-1  | Japonica | NA       |           | Os03g0356700 | OsR498G0305980300.01.T06 | HP domain-containing protein                                                |
| maker-3-augustus-gene-171.10-mRNA-1 | Japonica | NA       |           |              | OsR498G0305979000.01.T07 | Alpha-N-acetylglucosaminidase isoform X1                                    |
| maker-3-augustus-gene-171.11-mRNA-1 | Japonica | NA       |           |              | OsR498G0305979000.01.T04 | Alpha-N-acetylglucosaminidase isoform X1                                    |
| maker-3-augustus-gene-171.7-mRNA-1  | Japonica | NA       |           |              |                          |                                                                             |
| maker-3-augustus-gene-172.0-mRNA-1  | Japonica | NA       |           | Os03g0358100 | OsR498G0305983500.01.T01 | Glutathione peroxidase                                                      |
| maker-3-augustus-gene-172.13-mRNA-1 | Japonica | Indica   |           | Os07g0655400 | OsR498G0305983800.01.T01 | Rhomboid-like protein 19                                                    |
| maker-3-augustus-gene-172.5-mRNA-1  | Japonica | NA       |           |              |                          |                                                                             |
| maker-3-augustus-gene-172.8-mRNA-1  | Japonica | NA       |           |              | OsR498G0305983200.01.T03 | CID domain-containing protein                                               |
| maker-3-augustus-gene-173.48-mRNA-1 | Japonica | NA       |           |              | OsR498G0305988200.01.T02 | branched-chain-amino-acid aminotransferase-like protein 1                   |
| maker-3-augustus-gene-174.46-mRNA-1 | Japonica | NA       |           | Os05g0368300 | OsR498G0510685100.01.T01 | S4 RNA-binding domain-containing protein (Fragment)                         |
| maker-3-augustus-gene-175.0-mRNA-1  | Japonica | NA       |           |              |                          | HEAT repeat family protein, expressed                                       |
| maker-3-augustus-gene-175.10-mRNA-1 | Japonica | NA       |           |              |                          | Endo/exonuclease/phosphatase domain-containing protein (Fragment)           |
| maker-3-augustus-gene-175.11-mRNA-1 | Japonica | Indica   |           | Os07g0645500 | OsR498G0305991300.01.T01 | Endonuclease/exonuclease/phosphatase                                        |
| maker-3-augustus-gene-175.14-mRNA-1 | Japonica | Japonica |           | Os03g0361100 | OsR498G0305992500.01.T01 | Terpene synthase family, metal binding domain containing protein, expressed |
| maker-3-augustus-gene-175.22-mRNA-1 | Japonica | Japonica |           | Os03g0361500 | OsR498G0305993600.01.T01 | Terpene synthase family, metal binding domain containing protein, expressed |
| maker-3-augustus-gene-175.5-mRNA-1  | Japonica | NA       |           |              | OsR498G0305991100.01.T03 | Methionine sulfoxide reductase                                              |
| maker-3-augustus-gene-176.0-mRNA-1  | Japonica | NA       |           | Os03g0362200 | OsR498G0305997700.01.T01 | Armadillo                                                                   |
| maker-3-augustus-gene-176.14-mRNA-1 | Japonica | NA       |           | Os03g0361700 | OsR498G0305996000.01.T01 | Terpene synthase family, metal binding domain containing protein, expressed |
| maker-3-augustus-gene-176.17-mRNA-1 | Japonica | Indica   |           | Os03g0361100 | OsR498G0305996700.01.T01 | Terpene synthase family, metal binding domain containing protein, expressed |
| maker-3-augustus-gene-176.19-mRNA-1 | Japonica | Indica   |           | Os03g0361700 | OsR498G0305996500.01.T01 | Terpene synthase family, metal binding domain containing protein, expressed |
| maker-3-augustus-gene-176.2-mRNA-1  | Japonica | Japonica |           | Os03g0363100 | OsR498G0305997700.01.T01 | Armadillo/beta-catenin-like repeat protein                                  |
| maker-3-augustus-gene-176.21-mRNA-1 | Japonica | NA       |           | Os03g0363500 | OsR498G0305999000.01.T02 | MFS domain-containing protein (Fragment)                                    |
| maker-3-augustus-gene-176.4-mRNA-1  | Japonica | NA       |           | Os03g0363350 | OsR498G0305998300.01.T01 | Rieske domain-containing protein                                            |
| maker-3-augustus-gene-176.7-mRNA-1  | Japonica | NA       |           | Os03g0363400 | OsR498G0305998700.01.T03 | Atherin                                                                     |
| maker-3-augustus-gene-177.10-mRNA-1 | Japonica | NA       | Kinase-TM | Os03g0364400 | OsR498G0306001300.01.T01 | probable serine/threonine-protein kinase PBL15                              |
| maker-3-augustus-gene-177.14-mRNA-1 | Japonica | NA       |           |              | OsR498G0306002500.01.T02 | TFIIIS N-terminal domain-containing protein                                 |
| maker-3-augustus-gene-177.20-mRNA-1 | Japonica | Japonica |           | Os03g0363600 | OsR498G0305999200.01.T01 | MFS domain-containing protein                                               |
| maker-3-augustus-gene-177.26-mRNA-1 | Japonica | NA       |           | Os03g0363950 | OsR498G0306000200.01.T02 | Sulfotransferase                                                            |
| maker-3-augustus-gene-177.31-mRNA-1 | Japonica | NA       |           |              |                          | Polyubiquitin 9                                                             |
| maker-3-augustus-gene-177.35-mRNA-1 | Japonica | NA       |           |              |                          | Stomatal closure-related actin-binding protein 1                            |
| maker-3-augustus-gene-177.4-mRNA-1  | Japonica | NA       |           | Os03g0363900 | OsR498G0305999900.01.T01 | S-acyltransferase                                                           |
| maker-3-augustus-gene-178.0-mRNA-1  | Japonica | NA       |           | Os03g0365800 | OsR498G0306006500.01.T01 | GDSL esterase/lipase                                                        |
| maker-3-augustus-gene-178.1-mRNA-1  | Japonica | Japonica |           | Os03g0365800 | OsR498G0306006500.01.T01 | GDSL-lipase                                                                 |
| maker-3-augustus-gene-178.12-mRNA-1 | Japonica | NA       | Kinase-TM | Os03g0366200 | OsR498G0306008700.01.T02 | Calcium/calmodulin-dependent serine/threonine-protein kinase 1              |
| maker-3-augustus-gene-178.18-mRNA-1 | Japonica | Indica   |           | Os07g0641000 | OsR498G0306009300.01.T03 | O-fucosyltransferase family protein (Fragment)                              |
| maker-3-augustus-gene-178.22-mRNA-1 | Japonica | NA       |           | Os03g0366000 | OsR498G0306007000.01.T02 | Chaperonin, mitochondrial                                                   |
| maker-3-augustus-gene-178.8-mRNA-1  | Japonica | Indica   |           | Os03g0365900 | OsR498G0306006700.01.T01 | GDSL-like Lipase/Acylhydrolase family protein, expressed                    |
| maker-3-augustus-gene-179.0-mRNA-1  | Japonica | NA       |           | Os03g0367000 | OsR498G0306010100.01.T01 | Peptidylprolyl isomerase                                                    |
| maker-3-augustus-gene-179.11-mRNA-1 | Japonica | NA       |           | Os03g0367900 | OsR498G0306013100.01.T03 | Pyrrolidone-carboxylate peptidase-like                                      |

|                                     |          |          |  |              |                          |                                                            |
|-------------------------------------|----------|----------|--|--------------|--------------------------|------------------------------------------------------------|
| maker-3-augustus-gene-179.15-mRNA-1 | Japonica | NA       |  | Os03g0368300 | OsR498G0306013500.01.T01 | Peroxidase                                                 |
| maker-3-augustus-gene-179.17-mRNA-1 | Japonica | Japonica |  | Os03g0368600 | OsR498G0306015100.01.T01 | Peroxidase                                                 |
| maker-3-augustus-gene-179.20-mRNA-1 | Japonica | NA       |  | Os03g0368300 | OsR498G0306013500.01.T01 | Peroxidase                                                 |
| maker-3-augustus-gene-179.7-mRNA-1  | Japonica | NA       |  |              | OsR498G0306011500.01.T01 | Flavonoid hydroxylase                                      |
| maker-3-augustus-gene-179.9-mRNA-1  | Japonica | NA       |  | Os03g0367800 |                          | SWR1 complex subunit like                                  |
| maker-3-augustus-gene-18.26-mRNA-1  | Japonica | NA       |  | Os03g0137200 | OsR498G0305193500.01.T03 | Protein-serine/threonine phosphatase                       |
| maker-3-augustus-gene-18.33-mRNA-1  | Japonica | NA       |  | Os03g0137600 | OsR498G0305194700.01.T02 | GATA zinc finger domain-containing protein 10              |
| maker-3-augustus-gene-18.35-mRNA-1  | Japonica | NA       |  | Os03g0137800 | OsR498G0305197100.01.T01 | Cyclin-dependent kinase inhibitor                          |
| maker-3-augustus-gene-18.38-mRNA-1  | Japonica | NA       |  | Os03g0138000 | OsR498G0305197900.01.T01 | No pollen germination related 2                            |
| maker-3-augustus-gene-18.40-mRNA-1  | Japonica | NA       |  | Os03g0136800 | OsR498G0305190800.01.T01 | J domain-containing protein                                |
| maker-3-augustus-gene-18.42-mRNA-1  | Japonica | NA       |  | Os03g0136900 | OsR498G0305191400.01.T01 | Aconitate hydratase                                        |
| maker-3-augustus-gene-18.48-mRNA-1  | Japonica | Indica   |  | Os03g0137300 | OsR498G0305193800.01.T01 | protein CHAPERONE-LIKE PROTEIN OF POR1, chloroplastic-like |
| maker-3-augustus-gene-18.51-mRNA-1  | Japonica | NA       |  | Os03g0137700 | OsR498G0305195000.01.T01 | Magnesium transporter                                      |
| maker-3-augustus-gene-180.0-mRNA-1  | Japonica | NA       |  | Os03g0368900 | OsR498G0306016300.01.T01 | Peroxidase                                                 |
| maker-3-augustus-gene-180.13-mRNA-1 | Japonica | NA       |  |              | OsR498G0306020300.01.T01 | NYN domain-containing protein (Fragment)                   |
| maker-3-augustus-gene-180.16-mRNA-1 | Japonica | NA       |  | Os03g0370900 | OsR498G0306024100.01.T01 | Cytochrome P450 family protein, expressed                  |
| maker-3-augustus-gene-180.18-mRNA-1 | Japonica | NA       |  | Os03g0369800 | OsR498G0306019600.01.T02 | t-SNARE coiled-coil homology domain-containing protein     |
| maker-3-augustus-gene-180.2-mRNA-1  | Japonica | NA       |  | Os03g0369000 | OsR498G0306017500.01.T01 | Peroxidase                                                 |
| maker-3-augustus-gene-180.23-mRNA-1 | Japonica | NA       |  |              |                          | Stress-induced hydrophobic peptide                         |
| maker-3-augustus-gene-180.4-mRNA-1  | Japonica | NA       |  | Os03g0369100 | OsR498G0306018100.01.T01 | AAI domain-containing protein                              |
| maker-3-augustus-gene-180.6-mRNA-1  | Japonica | NA       |  | Os03g0369200 | OsR498G0306018300.01.T01 | Peroxidase                                                 |
| maker-3-augustus-gene-180.8-mRNA-1  | Japonica | NA       |  | Os03g0369400 | OsR498G0306018500.01.T01 | Peroxidase                                                 |
| maker-3-augustus-gene-181.19-mRNA-1 | Japonica | NA       |  |              |                          | Secologanin synthase                                       |
| maker-3-augustus-gene-181.21-mRNA-1 | Japonica | NA       |  |              | OsR498G0306027800.01.T01 | Transcription factor MYB32                                 |
| maker-3-augustus-gene-182.0-mRNA-1  | Japonica | NA       |  | Os03g0372500 | OsR498G0306030300.01.T02 | PPM-type phosphatase domain-containing protein (Fragment)  |
| maker-3-augustus-gene-182.10-mRNA-1 | Japonica | NA       |  |              | OsR498G0306030800.01.T01 | Inositol-pentakisphosphate 2-kinase                        |
| maker-3-augustus-gene-182.12-mRNA-1 | Japonica | NA       |  | Os03g0374100 | OsR498G0306031800.01.T01 | Hepatocellular carcinoma-associated antigen 59             |
| maker-3-augustus-gene-182.3-mRNA-1  | Japonica | NA       |  | Os03g0372700 | OsR498G0306030900.01.T01 | Low temperature viability protein, expressed               |
| maker-3-augustus-gene-182.5-mRNA-1  | Japonica | NA       |  | Os03g0374400 | OsR498G0306032700.01.T01 | TVP38/TMEM64 family membrane protein like                  |
| maker-3-augustus-gene-183.33-mRNA-1 | Japonica | Indica   |  | Os03g0374900 | OsR498G0306036800.01.T01 | Polyamine transporter                                      |
| maker-3-augustus-gene-184.0-mRNA-1  | Japonica | NA       |  | Os03g0376900 | OsR498G0306042300.01.T01 | Polypyrimidine tract-binding protein like 1                |
| maker-3-augustus-gene-184.16-mRNA-1 | Japonica | NA       |  |              | OsR498G0306044100.01.T02 | Nuclear control of ATPase protein 2                        |
| maker-3-augustus-gene-184.24-mRNA-1 | Japonica | Japonica |  | Os03g0378000 | OsR498G0306046100.01.T03 | probable apyrase 6                                         |
| maker-3-augustus-gene-184.28-mRNA-1 | Japonica | NA       |  | Os03g0378200 | OsR498G0306046700.01.T03 | Transferase transferring acyl groups                       |
| maker-3-augustus-gene-184.33-mRNA-1 | Japonica | NA       |  | Os03g0376600 | OsR498G0306042000.01.T01 | Ribonucleoprotein B, chloroplastic                         |
| maker-3-augustus-gene-184.35-mRNA-1 | Japonica | NA       |  | Os03g0376800 | OsR498G0306042200.01.T02 | RNA-binding KH domain-containing protein RCF3              |
| maker-3-augustus-gene-184.38-mRNA-1 | Japonica | NA       |  | Os03g0377700 | OsR498G0306044400.01.T02 | Putative mannan synthase 7                                 |
| maker-3-augustus-gene-184.7-mRNA-1  | Japonica | NA       |  | Os03g0377100 | OsR498G0306042500.01.T01 | Expansin                                                   |
| maker-3-augustus-gene-184.9-mRNA-1  | Japonica | NA       |  |              | OsR498G0306043500.01.T04 |                                                            |
| maker-3-augustus-gene-185.0-mRNA-1  | Japonica | NA       |  | Os03g0379100 | OsR498G0306048300.01.T02 | Methyltransferase                                          |
| maker-3-augustus-gene-185.2-mRNA-1  | Japonica | NA       |  | Os03g0379300 | OsR498G0306048500.01.T01 | Transcription factor bHLH47                                |
| maker-3-augustus-gene-186.11-mRNA-1 | Japonica | NA       |  |              | OsR498G0306053700.01.T01 |                                                            |
| maker-3-augustus-gene-186.13-mRNA-1 | Japonica | NA       |  | Os08g0487300 | OsR498G0816350400.01.T01 | Transposon protein, putative, Mutator sub-class            |
| maker-3-augustus-gene-186.16-mRNA-1 | Japonica | NA       |  | Os03g0381000 | OsR498G0306052600.01.T01 | Aldose 1-epimerase                                         |
| maker-3-augustus-gene-186.18-mRNA-1 | Japonica | Indica   |  | Os03g0381300 | OsR498G0306053600.01.T01 | CS domain-containing protein (Fragment)                    |
| maker-3-augustus-gene-186.23-mRNA-1 | Japonica | NA       |  | Os03g0381500 | OsR498G0306054000.01.T01 |                                                            |
| maker-3-augustus-gene-186.6-mRNA-1  | Japonica | NA       |  |              | OsR498G0306052900.01.T05 | tRNA pseudouridine synthase                                |
| maker-3-augustus-gene-186.8-mRNA-1  | Japonica | NA       |  | Os03g0381200 | OsR498G0306053300.01.T01 | F-actin-capping protein subunit beta                       |
| maker-3-augustus-gene-187.38-mRNA-1 | Japonica | NA       |  | Os03g0383900 | OsR498G0306057500.01.T03 | HMA domain-containing protein                              |
| maker-3-augustus-gene-187.40-mRNA-1 | Japonica | NA       |  |              | OsR498G0306056800.01.T03 | SAP domain-containing protein (Fragment)                   |
| maker-3-augustus-gene-188.33-mRNA-1 | Japonica | NA       |  | Os03g0385400 | OsR498G0306060700.01.T01 | AAI domain-containing protein                              |
| maker-3-augustus-gene-188.45-mRNA-1 | Japonica | NA       |  | Os03g0385301 |                          | Zinc finger CCCH domain-containing protein 15              |
| maker-3-augustus-gene-188.47-mRNA-1 | Japonica | Japonica |  | Os03g0385900 | OsR498G0306062000.01.T02 | Small subunit ribosomal protein (Fragment)                 |
| maker-3-augustus-gene-189.22-mRNA-1 | Japonica | NA       |  | Os03g0386500 | OsR498G0306065700.01.T03 | Trehalose 6-phosphate phosphatase                          |
| maker-3-augustus-gene-189.26-mRNA-1 | Japonica | NA       |  |              | OsR498G0306067500.01.T03 | Carboxypeptidase                                           |
| maker-3-augustus-gene-189.28-mRNA-1 | Japonica | NA       |  | Os03g0386800 | OsR498G0306067900.01.T02 | Carboxypeptidase                                           |
| maker-3-augustus-gene-189.32-mRNA-1 | Japonica | NA       |  |              | OsR498G0306069100.01.T01 | Intron-binding protein aquarius                            |
| maker-3-augustus-gene-189.39-mRNA-1 | Japonica | NA       |  | Os03g0387100 | OsR498G0306069500.01.T01 | Proteasome endopeptidase complex                           |
| maker-3-augustus-gene-189.45-mRNA-1 | Japonica | NA       |  | Os03g0387800 | OsR498G0306072700.01.T01 | Naringenin,2-oxoglutarate 3-dioxygenase                    |
| maker-3-augustus-gene-19.40-mRNA-1  | Japonica | NA       |  | Os03g0138500 | OsR498G0305199500.01.T01 |                                                            |
| maker-3-augustus-gene-19.42-mRNA-1  | Japonica | NA       |  | Os03g0139100 | OsR498G0305201500.01.T01 | Ribosomal protein L17                                      |

|                                     |          |          |           |              |                          |                                                             |
|-------------------------------------|----------|----------|-----------|--------------|--------------------------|-------------------------------------------------------------|
| maker-3-augustus-gene-19.46-mRNA-1  | Japonica | NA       |           |              | OsR498G0305198400.01.T03 | RNA recognition motif family protein, expressed             |
| maker-3-augustus-gene-19.50-mRNA-1  | Japonica | Japonica |           | Os03g0138600 | OsR498G0305200000.01.T02 | MHD1 domain-containing protein                              |
| maker-3-augustus-gene-19.54-mRNA-1  | Japonica | NA       |           | Os03g0138700 | OsR498G0305200400.01.T01 | Peptide transporter 3                                       |
| maker-3-augustus-gene-19.56-mRNA-1  | Japonica | NA       |           | Os03g0139200 | OsR498G0305201800.01.T03 | CCT domain-containing protein                               |
| maker-3-augustus-gene-19.59-mRNA-1  | Japonica | NA       |           | Os03g0139500 | OsR498G0305202800.01.T01 | CCT motif family protein, expressed                         |
| maker-3-augustus-gene-190.0-mRNA-1  | Japonica | NA       |           | Os03g0387900 | OsR498G0306073500.01.T04 |                                                             |
| maker-3-augustus-gene-190.15-mRNA-1 | Japonica | Indica   |           | Os03g0388000 | OsR498G0306073800.01.T03 | Serine/arginine-rich splicing factor like                   |
| maker-3-augustus-gene-190.17-mRNA-1 | Japonica | NA       |           | Os03g0388100 | OsR498G0306074200.01.T02 | ATP-dependent RNA helicase DBP2-A                           |
| maker-3-augustus-gene-190.20-mRNA-1 | Japonica | NA       |           |              | OsR498G0306077000.01.T01 | MYb transcription factor 18                                 |
| maker-3-augustus-gene-190.27-mRNA-1 | Japonica | NA       |           | Os03g0389100 | OsR498G0306081000.01.T01 | zf-LSD1 domain-containing protein                           |
| maker-3-augustus-gene-190.5-mRNA-1  | Japonica | NA       |           |              | OsR498G0306076100.01.T01 | Calmodulin-binding transcription activator 2                |
| maker-3-augustus-gene-191.0-mRNA-1  | Japonica | NA       |           | Os03g0389700 | OsR498G0306083900.01.T01 | Phospho-2-dehydro-3-deoxyheptonate aldolase                 |
| maker-3-augustus-gene-191.10-mRNA-1 | Japonica | NA       |           | Os03g0390400 | OsR498G0306085500.01.T01 | Cytochrome c oxidase subunit                                |
| maker-3-augustus-gene-191.13-mRNA-1 | Japonica | NA       |           | Os03g0390600 | OsR498G0306085700.01.T05 | Histone domain-containing protein (Fragment)                |
| maker-3-augustus-gene-191.16-mRNA-1 | Japonica | Indica   |           | Os03g0390700 | OsR498G0306085900.01.T02 | Hydroxylisourate hydrolase                                  |
| maker-3-augustus-gene-191.20-mRNA-1 | Japonica | Indica   |           | Os04g0682000 | OsR498G0306086100.01.T02 | Cysteine protease                                           |
| maker-3-augustus-gene-191.27-mRNA-1 | Japonica | NA       |           | Os03g0390000 | OsR498G0306085000.01.T01 | 40S ribosomal protein S6                                    |
| maker-3-augustus-gene-191.3-mRNA-1  | Japonica | NA       |           |              |                          | JmjC domain-containing protein                              |
| maker-3-augustus-gene-191.31-mRNA-1 | Japonica | NA       | Kinase-TM | Os03g0390200 | OsR498G0306085400.01.T01 | Serine/threonine-protein kinase SRK2C                       |
| maker-3-augustus-gene-191.35-mRNA-1 | Japonica | NA       |           | Os11g0432800 | OsR498G1120015800.01.T02 | Protein RETICULATA chloroplastic                            |
| maker-3-augustus-gene-192.0-mRNA-1  | Japonica | Indica   |           | Os05g0171000 | OsR498G0306086700.01.T01 | Phospholipase D                                             |
| maker-3-augustus-gene-195.10-mRNA-1 | Japonica | NA       |           | Os03g0395300 | OsR498G0306105600.01.T01 | Protein WEAK CHLOROPLAST MOVEMENT UNDER BLUE LIGHT 1        |
| maker-3-augustus-gene-195.7-mRNA-1  | Japonica | NA       |           | Os03g0395000 | OsR498G0306105000.01.T01 | Inactive heme oxygenase                                     |
| maker-3-augustus-gene-198.2-mRNA-1  | Japonica | Japonica |           | Os03g0399300 | OsR498G0713610100.01.T02 | Inwardly rectifying potassium channel subunit               |
| maker-3-augustus-gene-2.0-mRNA-1    | Japonica | Japonica |           | Os03g0107100 | OsR498G0305097000.01.T04 | Plasma membrane ATPase                                      |
| maker-3-augustus-gene-2.14-mRNA-1   | Japonica | NA       |           | Os04g0119300 | OsR498G0305093300.01.T01 | DUF1990 domain-containing protein (Fragment)                |
| maker-3-augustus-gene-2.17-mRNA-1   | Japonica | NA       |           | Os03g0107900 | OsR498G0305094500.01.T01 | Glucuronoxylan glucuronosyltransferase                      |
| maker-3-augustus-gene-2.20-mRNA-1   | Japonica | NA       |           | Os10g0545600 |                          | Zinc finger, C3HC4 type family protein, expressed           |
| maker-3-augustus-gene-2.28-mRNA-1   | Japonica | Indica   |           | Os03g0108400 | OsR498G0305095900.01.T01 | Vacuolar protein sorting-associated protein 1               |
| maker-3-augustus-gene-2.39-mRNA-1   | Japonica | NA       |           | Os03g0107300 | OsR498G0305091200.01.T02 | Putative transporter arsB                                   |
| maker-3-augustus-gene-2.4-mRNA-1    | Japonica | Indica   |           | Os03g0107400 | OsR498G0305091900.01.T04 | Myosin-2 heavy chain-like isoform X1                        |
| maker-3-augustus-gene-2.43-mRNA-1   | Japonica | NA       |           |              | OsR498G0305094000.01.T02 | Phosphoglucan phosphatase                                   |
| maker-3-augustus-gene-2.49-mRNA-1   | Japonica | NA       |           | Os03g0108000 | OsR498G0305094800.01.T02 | Rhodanese domain-containing protein (Fragment)              |
| maker-3-augustus-gene-2.51-mRNA-1   | Japonica | NA       |           | Os03g0108300 | OsR498G0305095600.01.T01 | Xyloglucan endotransglucosylase/hydrolase                   |
| maker-3-augustus-gene-2.53-mRNA-1   | Japonica | NA       |           | Os03g0108500 | OsR498G0305096200.01.T01 | Aldehyde oxygenase (deformylating)                          |
| maker-3-augustus-gene-2.9-mRNA-1    | Japonica | NA       |           | Os03g0107500 |                          | Ring/U-Box superfamily protein, putative isoform 3          |
| maker-3-augustus-gene-20.0-mRNA-1   | Japonica | NA       |           | Os03g0140700 | OsR498G0305209100.01.T01 | TPR transcription factor                                    |
| maker-3-augustus-gene-20.14-mRNA-1  | Japonica | NA       |           | Os01g0838725 | OsR498G1018411500.01.T01 |                                                             |
| maker-3-augustus-gene-20.17-mRNA-1  | Japonica | Japonica |           | Os03g0141100 | OsR498G0714417100.01.T01 | Transposase (Fragment)                                      |
| maker-3-augustus-gene-20.2-mRNA-1   | Japonica | NA       |           | Os03g0140900 | OsR498G0305210300.01.T01 |                                                             |
| maker-3-augustus-gene-20.4-mRNA-1   | Japonica | NA       |           | Os03g0141000 | OsR498G0305210500.01.T01 | 60S ribosomal protein L21 isoform 1                         |
| maker-3-augustus-gene-20.6-mRNA-1   | Japonica | NA       |           | Os03g0141200 | OsR498G0305210700.01.T01 | Beta-amylase 2, chloroplastic                               |
| maker-3-augustus-gene-20.9-mRNA-1   | Japonica | Japonica |           | Os03g0141700 | OsR498G0305211900.01.T02 |                                                             |
| maker-3-augustus-gene-200.34-mRNA-1 | Japonica | Indica   |           | Os07g0616600 | OsR498G0306136300.01.T01 | 40S ribosomal protein 5A                                    |
| maker-3-augustus-gene-200.39-mRNA-1 | Japonica | Indica   |           | Os07g0616200 | OsR498G0306136700.01.T04 | Beta-ketoacyl-[acyl-carrier-protein] synthase I             |
| maker-3-augustus-gene-200.44-mRNA-1 | Japonica | NA       |           | Os03g0402000 | OsR498G0306136000.01.T01 | Trafficking protein particle complex subunit                |
| maker-3-augustus-gene-200.49-mRNA-1 | Japonica | NA       |           |              | OsR498G0306137800.01.T01 | Transcription factor btd-like                               |
| maker-3-augustus-gene-200.51-mRNA-1 | Japonica | NA       |           |              | OsR498G0306139200.01.T01 |                                                             |
| maker-3-augustus-gene-201.0-mRNA-1  | Japonica | NA       |           | Os03g0402800 | OsR498G0306144200.01.T01 | Tify domain-containing protein                              |
| maker-3-augustus-gene-202.32-mRNA-1 | Japonica | NA       |           | Os03g0403100 | OsR498G0306144900.01.T05 | DNA-directed RNA polymerase subunit beta                    |
| maker-3-augustus-gene-203.34-mRNA-1 | Japonica | NA       |           | Os03g0404800 | OsR498G0306150300.01.T02 | 3beta-hydroxysteroid-dehydrogenase/decarboxylase isoform 1  |
| maker-3-augustus-gene-203.38-mRNA-1 | Japonica | NA       |           | Os03g0405000 | OsR498G0306152100.01.T04 | Sterol-4-alpha-carboxylate 3-dehydrogenase, decarboxylating |
| maker-3-augustus-gene-203.45-mRNA-1 | Japonica | NA       |           | Os03g0405100 | OsR498G0306152500.01.T02 | Ubiquinone biosynthesis protein (Fragment)                  |
| maker-3-augustus-gene-203.48-mRNA-1 | Japonica | NA       |           | Os03g0405500 | OsR498G0306153100.01.T01 | Nucleoredoxin like                                          |
| maker-3-augustus-gene-203.52-mRNA-1 | Japonica | NA       |           | Os03g0405550 |                          |                                                             |
| maker-3-augustus-gene-203.54-mRNA-1 | Japonica | NA       |           |              | OsR498G0306157700.01.T01 | Cotton nucleoredoxin 1                                      |
| maker-3-augustus-gene-204.0-mRNA-1  | Japonica | NA       |           | Os03g0406100 | OsR498G0306158900.01.T01 | SPX domain-containing protein 5                             |
| maker-3-augustus-gene-204.2-mRNA-1  | Japonica | Indica   |           | Os03g0406200 | OsR498G0306159500.01.T02 | Translation elongation factor 1-delta 1                     |
| maker-3-augustus-gene-204.8-mRNA-1  | Japonica | NA       |           |              | OsR498G0306160000.01.T01 | Nucleoside-diphosphate kinase                               |
| maker-3-augustus-gene-21.0-mRNA-1   | Japonica | Japonica |           | Os03g0141800 | OsR498G0305212900.01.T01 |                                                             |
| maker-3-augustus-gene-21.10-mRNA-1  | Japonica | NA       |           | Os03g0142900 | OsR498G0305215800.01.T01 | Vacuolar protein sorting-associated protein 62              |

|                                     |          |          |              |              |                          |                                                                              |
|-------------------------------------|----------|----------|--------------|--------------|--------------------------|------------------------------------------------------------------------------|
| maker-3-augustus-gene-21.12-mRNA-1  | Japonica | NA       |              |              | OsR498G0305216000.01.T01 | Methyltransferase-like protein 6 isoform B                                   |
| maker-3-augustus-gene-21.19-mRNA-1  | Japonica | NA       |              |              |                          | Nuclear transcription factor Y subunit A-8                                   |
| maker-3-augustus-gene-21.2-mRNA-1   | Japonica | NA       |              | Os03g0142500 | OsR498G0305214100.01.T01 | Zinc finger (C3HC4-type RING finger) family protein                          |
| maker-3-augustus-gene-21.4-mRNA-1   | Japonica | NA       |              | Os03g0142800 | OsR498G0305215500.01.T01 | ABC transporter C family MRP4                                                |
| maker-3-augustus-gene-21.8-mRNA-1   | Japonica | NA       |              | Os03g0142600 | OsR498G0305214400.01.T01 | Transcription factor MYB57                                                   |
| maker-3-augustus-gene-210.31-mRNA-1 | Japonica | NA       |              |              |                          | Mitochondrial import inner membrane translocase subunit Tim17 family protein |
| maker-3-augustus-gene-210.33-mRNA-1 | Japonica | NA       |              | Os03g0416200 | OsR498G0306209100.01.T02 | COBRA-like protein 5                                                         |
| maker-3-augustus-gene-210.35-mRNA-1 | Japonica | NA       |              | Os03g0416300 | OsR498G0306209400.01.T01 | COBRA-like protein 1                                                         |
| maker-3-augustus-gene-211.0-mRNA-1  | Japonica | Indica   |              | Os07g0178700 | OsR498G0306215800.01.T01 | Early light-inducible protein ELIP                                           |
| maker-3-augustus-gene-211.11-mRNA-1 | Japonica | NA       |              | Os03g0418600 | OsR498G0306222400.01.T04 |                                                                              |
| maker-3-augustus-gene-211.2-mRNA-1  | Japonica | Japonica |              | Os03g0417800 | OsR498G0306216800.01.T02 | Nitrilase-associated protein                                                 |
| maker-3-augustus-gene-211.5-mRNA-1  | Japonica | NA       |              | Os03g0417900 | OsR498G0306219200.01.T01 | Vacuolar protein sorting-associated protein 52 isogeny                       |
| maker-3-augustus-gene-212.48-mRNA-1 | Japonica | NA       |              | Os03g0418700 | OsR498G0306223300.01.T02 |                                                                              |
| maker-3-augustus-gene-212.52-mRNA-1 | Japonica | NA       |              | Os03g0418800 | OsR498G0306223900.01.T01 | Ras GTPase-activating protein-binding protein 1                              |
| maker-3-augustus-gene-212.56-mRNA-1 | Japonica | NA       |              | Os03g0419100 | OsR498G0306224500.01.T02 | Ninja-family protein 6                                                       |
| maker-3-augustus-gene-213.39-mRNA-1 | Japonica | NA       |              |              | OsR498G0307311800.01.T04 | Acylpyruvase FAHD1, mitochondrial                                            |
| maker-3-augustus-gene-213.40-mRNA-1 | Japonica | NA       |              | Os03g0421700 | OsR498G0306232900.01.T01 | Acylpyruvase FAHD1, mitochondrial                                            |
| maker-3-augustus-gene-213.49-mRNA-1 | Japonica | Japonica |              | Os03g0422600 | OsR498G0306234500.01.T01 | 3-oxo-Delta(45)-steroid 5-beta-reductase                                     |
| maker-3-augustus-gene-213.51-mRNA-1 | Japonica | Indica   |              | Os03g0421400 | OsR498G0306232800.01.T02 | Erlin-2-B isoform A                                                          |
| maker-3-augustus-gene-213.55-mRNA-1 | Japonica | NA       |              | Os03g0421800 | OsR498G0306233400.01.T01 | Predicted pectin lyase-like family protein with X8 domain                    |
| maker-3-augustus-gene-213.58-mRNA-1 | Japonica | NA       |              |              | OsR498G0306236600.01.T05 | UDP-N-acetylglucosamine transferase subunit ALG                              |
| maker-3-augustus-gene-214.34-mRNA-1 | Japonica | Indica   | Kinase-TM    | Os03g0424200 | OsR498G0306238100.01.T01 | U-box domain-containing protein 57                                           |
| maker-3-augustus-gene-214.36-mRNA-1 | Japonica | NA       |              | Os03g0423800 | OsR498G0306238300.01.T06 | Mediator of RNA polymerase II transcription subunit 8                        |
| maker-3-augustus-gene-214.39-mRNA-1 | Japonica | NA       |              | Os03g0424500 | OsR498G0306240900.01.T02 | 40S ribosomal protein S19                                                    |
| maker-3-augustus-gene-214.43-mRNA-1 | Japonica | Japonica | CC-Kinase-TM | Os03g0424000 | OsR498G0306240800.01.T02 | E3 ubiquitin ligase                                                          |
| maker-3-augustus-gene-214.46-mRNA-1 | Japonica | NA       |              |              | OsR498G0306238800.01.T06 | Ubiquitinyl hydrolase 1                                                      |
| maker-3-augustus-gene-214.48-mRNA-1 | Japonica | NA       | Kinase-TM    | Os03g0424200 | OsR498G0306240800.01.T02 | U-box domain-containing protein 32                                           |
| maker-3-augustus-gene-214.52-mRNA-1 | Japonica | NA       |              |              | OsR498G0306240800.01.T06 | U-box domain-containing protein 57                                           |
| maker-3-augustus-gene-214.58-mRNA-1 | Japonica | NA       |              | Os03g0424600 |                          | Zinc finger BED domain-containing protein RICESLEEPER 2-like                 |
| maker-3-augustus-gene-215.37-mRNA-1 | Japonica | NA       |              | Os03g0424500 | OsR498G0306241700.01.T02 | 40S ribosomal protein S19                                                    |
| maker-3-augustus-gene-215.41-mRNA-1 | Japonica | Indica   |              | Os03g0425000 | OsR498G0306241900.01.T02 | RAP domain-containing protein chloroplastic                                  |
| maker-3-augustus-gene-215.44-mRNA-1 | Japonica | NA       |              |              | OsR498G0306242900.01.T03 | Diacylglycerol kinase                                                        |
| maker-3-augustus-gene-215.51-mRNA-1 | Japonica | NA       |              | Os03g0425800 | OsR498G0306244500.01.T01 | SANT domain-containing protein                                               |
| maker-3-augustus-gene-215.53-mRNA-1 | Japonica | NA       |              | Os03g0425200 | OsR498G0306242600.01.T02 | probable uridine nucleosidase 2                                              |
| maker-3-augustus-gene-216.13-mRNA-1 | Japonica | NA       |              |              | OsR498G0306251000.01.T01 | Beta-caryophyllene synthase                                                  |
| maker-3-augustus-gene-216.2-mRNA-1  | Japonica | NA       |              | Os03g0426900 | OsR498G0306246900.01.T01 | Chaperone protein ClpB3 chloroplastic                                        |
| maker-3-augustus-gene-216.6-mRNA-1  | Japonica | NA       |              | Os03g0427300 | OsR498G0306248900.01.T01 | Glutelin type-A 3                                                            |
| maker-3-augustus-gene-216.8-mRNA-1  | Japonica | NA       |              |              | OsR498G0306250100.01.T02 | Ubiquitin conjugation factor like                                            |
| maker-3-augustus-gene-217.1-mRNA-1  | Japonica | NA       |              |              | OsR498G0306253300.01.T03 | ATP-dependent protease Clp ATPase subunit                                    |
| maker-3-augustus-gene-217.11-mRNA-1 | Japonica | NA       |              | Os03g0430000 | OsR498G0306256500.01.T06 | nuclear envelope integral membrane protein 1 isoform X3                      |
| maker-3-augustus-gene-217.16-mRNA-1 | Japonica | NA       |              |              | OsR498G0306251800.01.T01 | C2 tensin-type domain-containing protein                                     |
| maker-3-augustus-gene-217.4-mRNA-1  | Japonica | NA       |              | Os03g0429800 | OsR498G0306255700.01.T01 | Xanthine dehydrogenase                                                       |
| maker-3-augustus-gene-218.36-mRNA-1 | Japonica | NA       |              |              | OsR498G0306257500.01.T01 | JmjC domain containing protein, expressed                                    |
| maker-3-augustus-gene-218.39-mRNA-1 | Japonica | Indica   |              | Os02g0828900 | OsR498G0306257900.01.T01 | Transcription factor jumonji (JmjC) domain-containing protein                |
| maker-3-augustus-gene-218.50-mRNA-1 | Japonica | Japonica |              | Os03g0431200 | OsR498G0714654200.01.T04 | Amino-acid N-acetyltransferase                                               |
| maker-3-augustus-gene-218.56-mRNA-1 | Japonica | NA       |              | Os03g0431500 | OsR498G0306263800.01.T05 | Ubiquitin-like domain-containing protein                                     |
| maker-3-augustus-gene-218.57-mRNA-1 | Japonica | NA       |              | Os01g0444100 |                          |                                                                              |
| maker-3-augustus-gene-219.34-mRNA-1 | Japonica | NA       |              |              | OsR498G0306265310.01.T02 | TATA element modulatory factor isoform X1                                    |
| maker-3-augustus-gene-219.37-mRNA-1 | Japonica | NA       |              | Os03g0431932 | OsR498G0306265310.01.T05 | Myosin heavy chain-related                                                   |
| maker-3-augustus-gene-219.40-mRNA-1 | Japonica | NA       |              |              | OsR498G0306269500.01.T04 | Mechanosensitive ion channel protein 3 chloroplastic                         |
| maker-3-augustus-gene-219.48-mRNA-1 | Japonica | NA       |              | Os03g0432100 | OsR498G0306265800.01.T02 | Pyruvate, phosphate dikinase                                                 |
| maker-3-augustus-gene-22.48-mRNA-1  | Japonica | NA       |              | Os03g0143700 | OsR498G0305218700.01.T05 | Phosphatidylinositol N-acetylglucosaminyltransferase subunit P-related       |
| maker-3-augustus-gene-22.52-mRNA-1  | Japonica | NA       |              |              |                          | Transcription activators isoform 1                                           |
| maker-3-augustus-gene-22.59-mRNA-1  | Japonica | NA       |              | Os03g0143400 | OsR498G0305217600.01.T01 | Heat shock protein 60 isoform 1                                              |
| maker-3-augustus-gene-22.67-mRNA-1  | Japonica | NA       |              |              | OsR498G0305219200.01.T01 |                                                                              |
| maker-3-augustus-gene-221.27-mRNA-1 | Japonica | NA       |              | Os03g0434400 | OsR498G0306276700.01.T01 | Putative PhzC/PhzF-type epimerase                                            |
| maker-3-augustus-gene-221.32-mRNA-1 | Japonica | NA       |              | Os03g0435200 |                          | Pentatricopeptide, putative                                                  |
| maker-3-augustus-gene-221.34-mRNA-1 | Japonica | NA       |              | Os03g0435300 | OsR498G0306279500.01.T01 | U-box domain-containing protein 4                                            |
| maker-3-augustus-gene-221.36-mRNA-1 | Japonica | Japonica |              | Os03g0434500 | OsR498G0306278000.01.T01 | Peroxidase                                                                   |
| maker-3-augustus-gene-221.37-mRNA-1 | Japonica | NA       |              |              |                          | Peroxidase                                                                   |
| maker-3-augustus-gene-222.36-mRNA-1 | Japonica | NA       |              | Os03g0436300 | OsR498G0306282100.01.T01 | Calmodulin-binding protein, putative, expressed                              |

|                                     |          |          |        |              |                          |                                                                                 |
|-------------------------------------|----------|----------|--------|--------------|--------------------------|---------------------------------------------------------------------------------|
| maker-3-augustus-gene-222.41-mRNA-1 | Japonica | NA       |        | Os03g0437600 | OsR498G0306286600.01.T01 | Alpha/beta hydroxylase D14                                                      |
| maker-3-augustus-gene-223.38-mRNA-1 | Japonica | NA       |        | Os03g0439500 | OsR498G0306294500.01.T01 | Fe2OG dioxygenase domain-containing protein (Fragment)                          |
| maker-3-augustus-gene-223.40-mRNA-1 | Japonica | NA       |        | Os03g0438100 | OsR498G0306289400.01.T01 | Allene-oxide cyclase                                                            |
| maker-3-augustus-gene-224.0-mRNA-1  | Japonica | NA       | LRR-TM | Os03g0440900 | OsR498G0306297500.01.T01 | Somatic embryogenesis receptor kinase 1                                         |
| maker-3-augustus-gene-224.17-mRNA-1 | Japonica | NA       |        |              | OsR498G0306297800.01.T01 | RST domain-containing protein                                                   |
| maker-3-augustus-gene-224.5-mRNA-1  | Japonica | NA       |        | Os03g0439700 | OsR498G0306295000.01.T02 | protein CONSERVED IN THE GREEN LINEAGE AND DIATOMS 27, chloroplastic            |
| maker-3-augustus-gene-225.30-mRNA-1 | Japonica | NA       |        | Os03g0442900 | OsR498G0306305300.01.T02 |                                                                                 |
| maker-3-augustus-gene-225.32-mRNA-1 | Japonica | NA       |        | Os08g0487300 | OsR498G0816350400.01.T01 | Transposon protein, putative, Mutator sub-class                                 |
| maker-3-augustus-gene-226.27-mRNA-1 | Japonica | NA       |        |              |                          | HGWP repeat containing protein-like                                             |
| maker-3-augustus-gene-227.4-mRNA-1  | Japonica | NA       |        | Os03g0445700 | OsR498G0306326100.01.T01 | LOB domain-containing protein 37                                                |
| maker-3-augustus-gene-229.24-mRNA-1 | Japonica | Japonica |        | Os03g0448500 | OsR498G0203451400.01.T02 | Calcineurin B-like protein 7                                                    |
| maker-3-augustus-gene-23.30-mRNA-1  | Japonica | NA       |        | Os03g0145200 | OsR498G0305222100.01.T01 | GATA transcription factor                                                       |
| maker-3-augustus-gene-23.32-mRNA-1  | Japonica | NA       |        |              | OsR498G0305223500.01.T04 |                                                                                 |
| maker-3-augustus-gene-23.35-mRNA-1  | Japonica | NA       |        | Os03g0145700 | OsR498G0305223500.01.T02 |                                                                                 |
| maker-3-augustus-gene-23.37-mRNA-1  | Japonica | NA       |        |              |                          | E3 ubiquitin-protein ligase miel1                                               |
| maker-3-augustus-gene-23.45-mRNA-1  | Japonica | NA       |        | Os03g0146000 | OsR498G0305224700.01.T01 | GTP-binding protein yptV3                                                       |
| maker-3-augustus-gene-23.49-mRNA-1  | Japonica | NA       |        |              | OsR498G0305226300.01.T02 | Cyclin-dependent kinases regulatory subunit                                     |
| maker-3-augustus-gene-23.53-mRNA-1  | Japonica | Indica   |        | Os03g0146400 | OsR498G0305226500.01.T01 | Pheophorbide a oxygenase chloroplastic                                          |
| maker-3-augustus-gene-23.58-mRNA-1  | Japonica | NA       |        | Os03g0146500 | OsR498G0305226700.01.T02 | (RAP Annotation release2) Galactose-binding like domain containing protein      |
| maker-3-augustus-gene-23.63-mRNA-1  | Japonica | NA       |        | Os03g0145500 | OsR498G0305222800.01.T01 | UDENN domain-containing protein                                                 |
| maker-3-augustus-gene-23.70-mRNA-1  | Japonica | NA       |        |              |                          | Zinc finger CCCH domain-containing protein 48-like                              |
| maker-3-augustus-gene-23.72-mRNA-1  | Japonica | Indica   |        | Os03g0145800 | OsR498G0305224200.01.T01 | Tankyrase-1                                                                     |
| maker-3-augustus-gene-23.75-mRNA-1  | Japonica | Indica   |        | Os03g0146100 | OsR498G0305225000.01.T02 | Tonoplast intrinsic protein 1                                                   |
| maker-3-augustus-gene-230.21-mRNA-1 | Japonica | NA       |        |              | OsR498G0306318000.01.T01 | Exonuclease/helicase-like                                                       |
| maker-3-augustus-gene-230.23-mRNA-1 | Japonica | NA       |        |              |                          | Mitotic checkpoint protein BUB3                                                 |
| maker-3-augustus-gene-230.28-mRNA-1 | Japonica | NA       |        | Os03g0448700 | OsR498G0306320700.01.T03 | Interferon-related developmental regulator family protein / IFRD protein family |
| maker-3-augustus-gene-232.30-mRNA-1 | Japonica | NA       |        | Os03g0452300 | OsR498G0306330000.01.T02 | 30S ribosomal protein S5, chloroplastic                                         |
| maker-3-augustus-gene-233.0-mRNA-1  | Japonica | NA       |        | Os03g0453800 | OsR498G0306337300.01.T02 |                                                                                 |
| maker-3-augustus-gene-233.13-mRNA-1 | Japonica | NA       |        | Os12g0468900 | OsR498G0510193500.01.T01 | Cell wall protein-like                                                          |
| maker-3-augustus-gene-233.15-mRNA-1 | Japonica | NA       |        | Os03g0454100 | OsR498G0306337600.01.T01 | Serine incorporator 3                                                           |
| maker-3-augustus-gene-233.2-mRNA-1  | Japonica | NA       |        |              | OsR498G0306333700.01.T03 |                                                                                 |
| maker-3-augustus-gene-233.6-mRNA-1  | Japonica | NA       |        |              | OsR498G0306338700.01.T03 | LON peptidase N-terminal domain and RING finger protein 1                       |
| maker-3-augustus-gene-234.0-mRNA-1  | Japonica | NA       |        |              | OsR498G0306340300.01.T01 | DUF1336 domain containing protein expressed                                     |
| maker-3-augustus-gene-24.1-mRNA-1   | Japonica | NA       |        |              |                          | Protein SHOOT GRAVITROPISM 6 isoform D                                          |
| maker-3-augustus-gene-24.12-mRNA-1  | Japonica | NA       |        | Os03g0147400 | OsR498G0305229600.01.T02 | CitMHS domain-containing protein                                                |
| maker-3-augustus-gene-24.16-mRNA-1  | Japonica | Indica   |        | Os01g0267100 | OsR498G0305231800.01.T01 | Methyltransferase-like protein 1 isoform A                                      |
| maker-3-augustus-gene-24.21-mRNA-1  | Japonica | NA       |        | Os03g0148000 | OsR498G0305232200.01.T01 | Homogentisate phytyltransferase 1                                               |
| maker-3-augustus-gene-24.24-mRNA-1  | Japonica | NA       |        |              | OsR498G0305232600.01.T01 | Mesoderm development candidate                                                  |
| maker-3-augustus-gene-24.8-mRNA-1   | Japonica | NA       |        | Os03g0147900 | OsR498G0305231900.01.T03 | Mitochondrial inner membrane protease subunit 2                                 |
| maker-3-augustus-gene-240.34-mRNA-1 | Japonica | NA       |        |              | OsR498G0306444400.01.T01 | GDSL esterase/lipase                                                            |
| maker-3-augustus-gene-249.0-mRNA-1  | Japonica | NA       |        | Os03g0595200 | OsR498G0306493500.01.T01 | Cysteine synthase 2-like isoform X1                                             |
| maker-3-augustus-gene-25.38-mRNA-1  | Japonica | NA       | Kinase | Os03g0148700 | OsR498G0305233300.01.T01 | Serine/threonine protein kinase                                                 |
| maker-3-augustus-gene-25.43-mRNA-1  | Japonica | Indica   |        | Os03g0149400 | OsR498G0305237100.01.T05 | TPR Domain containing protein, expressed                                        |
| maker-3-augustus-gene-25.45-mRNA-1  | Japonica | NA       |        | Os03g0148800 |                          | Lysine-specific demethylase SE14                                                |
| maker-3-augustus-gene-25.47-mRNA-1  | Japonica | NA       |        | Os03g0149200 | OsR498G0305235800.01.T01 | HR-like lesion-inducing protein-related                                         |
| maker-3-augustus-gene-25.51-mRNA-1  | Japonica | NA       |        |              | OsR498G0305236200.01.T02 |                                                                                 |
| maker-3-augustus-gene-26.38-mRNA-1  | Japonica | Indica   |        | Os03g0150700 | OsR498G0305239700.01.T01 |                                                                                 |
| maker-3-augustus-gene-26.40-mRNA-1  | Japonica | NA       |        |              | OsR498G0305240700.01.T02 | Putative lysine-specific demethylase ELF6                                       |
| maker-3-augustus-gene-26.44-mRNA-1  | Japonica | NA       |        | Os03g0151700 | OsR498G0305241500.01.T01 | WD repeat-containing protein 3                                                  |
| maker-3-augustus-gene-26.48-mRNA-1  | Japonica | NA       |        | Os03g0152100 | OsR498G0305244100.01.T02 | Transcription factor-like protein DPB                                           |
| maker-3-augustus-gene-26.53-mRNA-1  | Japonica | NA       |        | Os03g0152300 | OsR498G0305244300.01.T01 | Peroxidase                                                                      |
| maker-3-augustus-gene-26.55-mRNA-1  | Japonica | NA       |        |              |                          | Appr-1-p processing enzyme family protein, expressed                            |
| maker-3-augustus-gene-26.62-mRNA-1  | Japonica | NA       |        | Os03g0151800 | OsR498G0305242000.01.T01 | Cell division cycle protein 48 like                                             |
| maker-3-augustus-gene-26.67-mRNA-1  | Japonica | NA       |        | Os03g0151900 | OsR498G0305242200.01.T01 | Ras-related protein RABF1                                                       |
| maker-3-augustus-gene-26.70-mRNA-1  | Japonica | NA       |        | Os03g0152000 | OsR498G0305243800.01.T01 | HMA domain-containing protein                                                   |
| maker-3-augustus-gene-26.75-mRNA-1  | Japonica | NA       |        |              | OsR498G0305245000.01.T01 | 4-coumarate--CoA ligase-like protein 7                                          |
| maker-3-augustus-gene-26.78-mRNA-1  | Japonica | NA       |        | Os03g0152600 | OsR498G0305245400.01.T03 | D-tagatose-1,6-bisphosphate aldolase subunit                                    |
| maker-3-augustus-gene-265.15-mRNA-1 | Japonica | NA       |        | Os10g0425500 | OsR498G1018754900.01.T01 | BTB/POZ and MATH domain-containing protein 1                                    |
| maker-3-augustus-gene-265.2-mRNA-1  | Japonica | NA       |        |              | OsR498G0409123600.01.T01 |                                                                                 |
| maker-3-augustus-gene-265.3-mRNA-1  | Japonica | NA       |        | Os10g0426800 | OsR498G1018758700.01.T01 | BTB domain-containing protein                                                   |
| maker-3-augustus-gene-265.6-mRNA-1  | Japonica | NA       |        | Os10g0425900 | OsR498G1018755900.01.T01 | BTB/POZ and MATH domain-containing protein 2                                    |

|                                     |          |          |              |                          |                                                           |
|-------------------------------------|----------|----------|--------------|--------------------------|-----------------------------------------------------------|
| maker-3-augustus-gene-266.0-mRNA-1  | Japonica | NA       | Os10g0423600 | OsR498G1018758400.01.T01 | Speckle-type POZ protein-like protein A                   |
| maker-3-augustus-gene-267.15-mRNA-1 | Japonica | NA       | Os10g0422200 | OsR498G1018745900.01.T01 | Hcy-binding domain-containing protein                     |
| maker-3-augustus-gene-267.3-mRNA-1  | Japonica | NA       | Os10g0422566 | OsR498G1018748000.01.T03 | Pentatricopeptide repeat-containing protein mitochondrial |
| maker-3-augustus-gene-267.4-mRNA-1  | Japonica | NA       |              | OsR498G1018745200.01.T01 | NAB domain-containing protein (Fragment)                  |
| maker-3-augustus-gene-267.7-mRNA-1  | Japonica | NA       | Os10g0422500 | OsR498G1018747300.01.T03 | Type IV inositol polyphosphate 5-phosphatase              |
| maker-3-augustus-gene-268.41-mRNA-1 | Japonica | NA       |              |                          |                                                           |
| maker-3-augustus-gene-268.43-mRNA-1 | Japonica | NA       |              | OsR498G1018741700.01.T01 | CAF1 family ribonuclease containing protein               |
| maker-3-augustus-gene-269.0-mRNA-1  | Japonica | NA       | Os10g0420000 | OsR498G1018738600.01.T01 | Alkylated DNA repair protein alkB like 6                  |
| maker-3-augustus-gene-269.11-mRNA-1 | Japonica | NA       | Os10g0419400 | OsR498G1018736600.01.T01 | 1,2-dihydroxy-3-keto-5-methylthiopentene dioxxygenase     |
| maker-3-augustus-gene-269.13-mRNA-1 | Japonica | NA       | Os10g0419300 | OsR498G1018736000.01.T03 | Heat shock transcription factor                           |
| maker-3-augustus-gene-269.15-mRNA-1 | Japonica | NA       | Os10g0419200 |                          | zinc finger protein JACKDAW                               |
| maker-3-augustus-gene-269.17-mRNA-1 | Japonica | NA       | Os10g0420400 | OsR498G1018739300.01.T01 | Sulfate anion transporter                                 |
| maker-3-augustus-gene-269.21-mRNA-1 | Japonica | NA       |              | OsR498G1018738700.01.T02 | IQ calmodulin-binding motif family protein, expressed     |
| maker-3-augustus-gene-269.24-mRNA-1 | Japonica | NA       | Os10g0419100 | OsR498G1018735300.01.T02 | Perakine reductase                                        |
| maker-3-augustus-gene-269.7-mRNA-1  | Japonica | NA       | Os10g0419600 | OsR498G1018737400.01.T01 | Chlorophyllase                                            |
| maker-3-augustus-gene-269.9-mRNA-1  | Japonica | NA       | Os10g0419500 | OsR498G1018737000.01.T01 | 1,2-dihydroxy-3-keto-5-methylthiopentene dioxxygenase     |
| maker-3-augustus-gene-27.46-mRNA-1  | Japonica | NA       | Os03g0152700 | OsR498G0305245500.01.T03 | S4 RNA-binding domain-containing protein (Fragment)       |
| maker-3-augustus-gene-27.52-mRNA-1  | Japonica | NA       | Os03g0152800 | OsR498G0305245700.01.T06 | S4 RNA-binding domain-containing protein                  |
| maker-3-augustus-gene-27.59-mRNA-1  | Japonica | Japonica | Os03g0152900 | OsR498G0305245900.01.T02 | Kinesin-like protein KIN-UA                               |
| maker-3-augustus-gene-27.65-mRNA-1  | Japonica | Indica   | Os03g0153500 | OsR498G0305246500.01.T01 | FAD binding domain containing protein, expressed          |
| maker-3-augustus-gene-27.67-mRNA-1  | Japonica | NA       | Os03g0153500 | OsR498G0305247100.01.T02 | FAD binding domain containing protein, expressed          |
| maker-3-augustus-gene-27.70-mRNA-1  | Japonica | NA       | Os03g0153900 | OsR498G0305247700.01.T03 | FAD binding domain containing protein, expressed          |
| maker-3-augustus-gene-27.74-mRNA-1  | Japonica | NA       | Os03g0154100 | OsR498G0305248100.01.T01 | FAD binding domain containing protein, expressed          |
| maker-3-augustus-gene-27.76-mRNA-1  | Japonica | NA       | Os03g0154700 | OsR498G0305248900.01.T01 | 30S ribosomal protein S4, chloroplastic                   |
| maker-3-augustus-gene-27.79-mRNA-1  | Japonica | NA       | Os03g0154100 | OsR498G0305249300.01.T01 | FAD binding domain containing protein, expressed          |
| maker-3-augustus-gene-27.80-mRNA-1  | Japonica | NA       | Os03g0155300 | OsR498G0305249700.01.T01 | Expansin                                                  |
| maker-3-augustus-gene-27.82-mRNA-1  | Japonica | NA       |              | OsR498G0305246200.01.T02 | Splicing factor isoform 1                                 |
| maker-3-augustus-gene-27.85-mRNA-1  | Japonica | Indica   | Os10g0439200 | OsR498G0305250200.01.T01 | Expansin                                                  |
| maker-3-augustus-gene-270.27-mRNA-1 | Japonica | NA       | Os10g0417800 | OsR498G1018729400.01.T02 | Plant-specific domain TIGR01615 family protein            |
| maker-3-augustus-gene-270.29-mRNA-1 | Japonica | NA       | Os10g0418000 | OsR498G1018731500.01.T01 | Probable histone H2A variant 2                            |
| maker-3-augustus-gene-270.31-mRNA-1 | Japonica | NA       | Os10g0417600 | OsR498G1018728100.01.T02 | GDP-mannose 3,5-epimerase 1                               |
| maker-3-augustus-gene-271.32-mRNA-1 | Japonica | NA       | Os10g0415900 | OsR498G1018721000.01.T03 | Histone acetyltransferase                                 |
| maker-3-augustus-gene-271.36-mRNA-1 | Japonica | NA       | Os10g0415400 | OsR498G1018719200.01.T03 |                                                           |
| maker-3-augustus-gene-271.38-mRNA-1 | Japonica | NA       | Os10g0415300 | OsR498G1018718600.01.T01 | Glutathione reductase, chloroplastic                      |
| maker-3-augustus-gene-271.43-mRNA-1 | Japonica | NA       | Os10g0415800 |                          | Acylamino-acid-releasing enzyme like                      |
| maker-3-augustus-gene-271.45-mRNA-1 | Japonica | NA       | Os10g0415600 | OsR498G1018720700.01.T05 | Acylaminoacyl-peptidase                                   |
| maker-3-augustus-gene-272.0-mRNA-1  | Japonica | NA       | Os10g0414500 | OsR498G1018716600.01.T02 | Putative 16S rRNA (Cytidine(1402)-2'-O)-methyltransferase |
| maker-3-augustus-gene-272.11-mRNA-1 | Japonica | NA       | Os10g0414800 | OsR498G1018717500.01.T01 | Myosin-binding protein 1                                  |
| maker-3-augustus-gene-272.13-mRNA-1 | Japonica | NA       | Os10g0414700 | OsR498G1018717300.01.T01 | KH domain containing protein, expressed                   |
| maker-3-augustus-gene-272.16-mRNA-1 | Japonica | NA       | Os10g0414000 | OsR498G1018712900.01.T01 | NAC domain-containing protein                             |
| maker-3-augustus-gene-272.18-mRNA-1 | Japonica | NA       | Os10g0413900 | OsR498G1018712500.01.T02 | NAC domain-containing protein                             |
| maker-3-augustus-gene-272.21-mRNA-1 | Japonica | NA       | Os10g0413700 | OsR498G1018711900.01.T01 | NAC domain-containing protein                             |
| maker-3-augustus-gene-272.23-mRNA-1 | Japonica | NA       | Os10g0413400 | OsR498G1018710900.01.T01 | Glycerol-3-phosphate 2-O-acyltransferase                  |
| maker-3-augustus-gene-272.4-mRNA-1  | Japonica | NA       | Os10g0413500 | OsR498G1018711200.01.T01 | Procollagen-proline 4-dioxygenase                         |
| maker-3-augustus-gene-272.9-mRNA-1  | Japonica | NA       | Os10g0415100 | OsR498G1018717900.01.T01 | GABA transporter 1                                        |
| maker-3-augustus-gene-273.24-mRNA-1 | Japonica | NA       | Os10g0412700 | OsR498G1018709400.01.T01 | Thaumatococcus                                            |
| maker-3-augustus-gene-273.26-mRNA-1 | Japonica | NA       | Os10g0412100 | OsR498G1018708600.01.T03 | Carbon catabolite repressor protein 2                     |
| maker-3-augustus-gene-273.31-mRNA-1 | Japonica | NA       |              | OsR498G1018708400.01.T02 | Phospholipid-transporting ATPase                          |
| maker-3-augustus-gene-273.42-mRNA-1 | Japonica | NA       |              |                          | 40S ribosomal protein S28                                 |
| maker-3-augustus-gene-274.31-mRNA-1 | Japonica | Indica   | Os03g0167400 | OsR498G1018705400.01.T01 | Lipase, putative, expressed                               |
| maker-3-augustus-gene-274.36-mRNA-1 | Japonica | NA       | Os10g0410700 | OsR498G1018704600.01.T02 | Histone-lysine N-methyltransferase ATXR4                  |
| maker-3-augustus-gene-274.37-mRNA-1 | Japonica | NA       | Os10g0410700 | OsR498G1018704600.01.T01 | Histone-lysine N-methyltransferase ATXR4                  |
| maker-3-augustus-gene-274.42-mRNA-1 | Japonica | NA       | Os10g0409900 | OsR498G1018704000.01.T01 | Kelch motif family protein, expressed                     |
| maker-3-augustus-gene-274.43-mRNA-1 | Japonica | NA       | Os10g0411500 | OsR498G1018706700.01.T01 | IQ domain-containing protein IQM6                         |
| maker-3-augustus-gene-274.47-mRNA-1 | Japonica | NA       |              | OsR498G1018704900.01.T01 | Transposable element protein, putative, MuDR              |
| maker-3-augustus-gene-274.48-mRNA-1 | Japonica | NA       | Os01g0204900 | OsR498G0203659800.01.T01 | rRNA N-glycosidase                                        |
| maker-3-augustus-gene-274.61-mRNA-1 | Japonica | NA       | Os10g0410600 | OsR498G1018704300.01.T02 | Serine/threonine-protein phosphatase                      |
| maker-3-augustus-gene-275.20-mRNA-1 | Japonica | NA       | Os10g0409400 | OsR498G1018700800.01.T01 | Polygalacturonase 2                                       |
| maker-3-augustus-gene-277.0-mRNA-1  | Japonica | NA       | Os10g0407200 | OsR498G1018685800.01.T01 | Putative endoplasmic reticulum membrane protein C16E8.02  |
| maker-3-augustus-gene-277.11-mRNA-1 | Japonica | NA       |              | OsR498G1018686900.01.T02 | Exonuclease                                               |
| maker-3-augustus-gene-277.15-mRNA-1 | Japonica | NA       | Os10g0406800 | OsR498G1018684300.01.T01 |                                                           |

|                                     |          |           |               |              |                          |                                                                |
|-------------------------------------|----------|-----------|---------------|--------------|--------------------------|----------------------------------------------------------------|
| maker-3-augustus-gene-277.2-mRNA-1  | Japonica | NA        |               | Os10g0407100 | OsR498G1018685600.01.T02 | 50S ribosomal protein L32, chloroplastic                       |
| maker-3-augustus-gene-277.4-mRNA-1  | Japonica | NA        |               |              | OsR498G1018685200.01.T03 | Pectinesterase                                                 |
| maker-3-augustus-gene-277.7-mRNA-1  | Japonica | NA        |               | Os10g0407500 | OsR498G1018687100.01.T01 | Ribulose-phosphate 3-epimerase                                 |
| maker-3-augustus-gene-278.0-mRNA-1  | Japonica | NA        |               |              | OsR498G1018681600.01.T01 | Putative mannan synthase 2                                     |
| maker-3-augustus-gene-278.14-mRNA-1 | Japonica | NA        |               | Os10g0405600 | OsR498G1018678000.01.T01 | ATP-dependent 6-phosphofructokinase 5, chloroplastic           |
| maker-3-augustus-gene-278.18-mRNA-1 | Japonica | NA        |               | Os10g0405500 | OsR498G1018677700.01.T01 | Meiosis-specific protein PAIR3                                 |
| maker-3-augustus-gene-278.22-mRNA-1 | Japonica | NA        |               | Os10g0405300 | OsR498G1018677300.01.T01 | AvrRpt-cleavage domain-containing protein (Fragment)           |
| maker-3-augustus-gene-278.24-mRNA-1 | Japonica | NA        | Kinase-TM     | Os10g0405100 | OsR498G1018676700.01.T05 | probable serine/threonine-protein kinase PBL3                  |
| maker-3-augustus-gene-278.8-mRNA-1  | Japonica | NA        |               | Os10g0406200 | OsR498G1018679400.01.T03 | Putative methyltransferase-like protein 7B-like                |
| maker-3-augustus-gene-28.0-mRNA-1   | Japonica | Indica    |               | Os03g0156000 | OsR498G0305250700.01.T01 | Expansin                                                       |
| maker-3-augustus-gene-28.10-mRNA-1  | Japonica | NA        |               | Os03g0157300 | OsR498G0305254100.01.T03 | Cell number regulator 13                                       |
| maker-3-augustus-gene-28.17-mRNA-1  | Japonica | NA        |               | Os03g0157500 | OsR498G0305254900.01.T02 | FH protein interacting protein FIP2                            |
| maker-3-augustus-gene-28.20-mRNA-1  | Japonica | Indica    |               | Os04g0228400 | OsR498G0305250400.01.T01 | Expansin                                                       |
| maker-3-augustus-gene-28.22-mRNA-1  | Japonica | NA        |               | Os03g0156600 | OsR498G0305252000.01.T01 | Heavy metal-associated isoprenylated protein 1                 |
| maker-3-augustus-gene-28.24-mRNA-1  | Japonica | NA        |               | Os03g0156700 | OsR498G0305252200.01.T02 | Nickel/cobalt transporter, high-affinity                       |
| maker-3-augustus-gene-28.27-mRNA-1  | Japonica | NA        |               | Os03g0157400 | OsR498G0305254600.01.T01 | ABC transporter domain-containing protein (Fragment)           |
| maker-3-augustus-gene-28.3-mRNA-1   | Japonica | NA        |               | Os03g0156000 | OsR498G0305251100.01.T01 | Expansin                                                       |
| maker-3-augustus-gene-28.5-mRNA-1   | Japonica | NA        |               | Os03g0156500 | OsR498G0305251700.01.T01 | HTH La-type RNA-binding domain-containing protein              |
| maker-3-augustus-gene-281.18-mRNA-1 | Japonica | NA        |               | Os10g0401100 | OsR498G1018661100.01.T01 | Endonuclease/Exonuclease/phosphatase family protein, expressed |
| maker-3-augustus-gene-283.0-mRNA-1  | Japonica | NA        |               |              | OsR498G1018649200.01.T01 | Delta(24)-sterol reductase                                     |
| maker-3-augustus-gene-283.2-mRNA-1  | Japonica | NA        |               | Os10g0397200 | OsR498G1018648800.01.T04 | Transcription initiation factor TFIIE beta subunit             |
| maker-3-augustus-gene-284.0-mRNA-1  | Japonica | NA        |               | Os10g0396400 | OsR498G1018647400.01.T02 | F-box/LRR-repeat protein 15                                    |
| maker-3-augustus-gene-284.12-mRNA-1 | Japonica | NA        |               | Os10g0402100 | OsR498G1018645200.01.T01 | No apical meristem protein, expressed                          |
| maker-3-augustus-gene-284.15-mRNA-1 | Japonica | NA        |               | Os10g0395400 | OsR498G1018644800.01.T01 | Bronze-2 protein (Fragment)                                    |
| maker-3-augustus-gene-284.17-mRNA-1 | Japonica | NA        |               |              |                          | Stress enhanced protein 1 chloroplastic                        |
| maker-3-augustus-gene-284.21-mRNA-1 | Japonica | NA        |               |              |                          | Myosin-15 isoform A                                            |
| maker-3-augustus-gene-284.28-mRNA-1 | Japonica | NA        |               | Os10g0395500 | OsR498G1018644900.01.T05 | Proteasome assembly chaperone 3                                |
| maker-3-augustus-gene-284.7-mRNA-1  | Japonica | NA        |               | Os10g0396300 | OsR498G1018646800.01.T02 | MOB kinase activator family                                    |
| maker-3-augustus-gene-285.37-mRNA-1 | Japonica | NA        | Kinase        | Os10g0395000 | OsR498G1018643000.01.T01 | Serine/threonine-protein kinase RIPK                           |
| maker-3-augustus-gene-285.44-mRNA-1 | Japonica | CC-NBS-TM |               |              | OsR498G1018641100.01.T02 | Putative disease resistance protein RGA3                       |
| maker-3-augustus-gene-285.47-mRNA-1 | Japonica | Indica    |               | Os03g0605300 | OsR498G1018640500.01.T01 | Subtilisin-like protease                                       |
| maker-3-augustus-gene-285.52-mRNA-1 | Japonica | NA        |               | Os10g0393800 | OsR498G1018638500.01.T01 | GDSL-like Lipase/Acylhydrolase family protein, expressed       |
| maker-3-augustus-gene-286.38-mRNA-1 | Japonica | NA        |               | Os10g0393100 | OsR498G1018638000.01.T01 | Presenilin/signal peptide peptidase                            |
| maker-3-augustus-gene-286.40-mRNA-1 | Japonica | NA        |               |              | OsR498G1018636800.01.T02 | Translation initiation factor eIF-2B beta subunit              |
| maker-3-augustus-gene-286.45-mRNA-1 | Japonica | NA        |               | Os10g0392500 |                          |                                                                |
| maker-3-augustus-gene-286.46-mRNA-1 | Japonica | NA        |               | Os10g0392400 | OsR498G1018635200.01.T01 | Tify domain-containing protein (Fragment)                      |
| maker-3-augustus-gene-286.48-mRNA-1 | Japonica | NA        |               | Os10g0393500 | OsR498G1018638100.01.T01 | GDSL esterase/lipase                                           |
| maker-3-augustus-gene-286.51-mRNA-1 | Japonica | NA        |               | Os10g0392900 | OsR498G1018637700.01.T01 | GDSL-like Lipase/Acylhydrolase family protein, expressed       |
| maker-3-augustus-gene-286.53-mRNA-1 | Japonica | NA        |               | Os10g0392600 | OsR498G1018636500.01.T01 | SPX domain-containing protein 3                                |
| maker-3-augustus-gene-287.17-mRNA-1 | Japonica | NA        |               | Os10g0390800 | OsR498G1018627100.01.T02 | Ethylene-responsive element binding protein 2                  |
| maker-3-augustus-gene-287.19-mRNA-1 | Japonica | NA        |               | Os10g0390650 |                          |                                                                |
| maker-3-augustus-gene-287.21-mRNA-1 | Japonica | NA        |               | Os10g0390600 | OsR498G1018626700.01.T03 | Alanine aminotransferase5                                      |
| maker-3-augustus-gene-287.26-mRNA-1 | Japonica | NA        |               | Os10g0390500 | OsR498G1018626300.01.T02 | Alanine aminotransferase                                       |
| maker-3-augustus-gene-287.4-mRNA-1  | Japonica | NA        |               |              | OsR498G1018628000.01.T03 |                                                                |
| maker-3-augustus-gene-287.7-mRNA-1  | Japonica | NA        |               | Os10g0390900 | OsR498G1018628000.01.T01 | SAC domain-containing protein                                  |
| maker-3-augustus-gene-287.9-mRNA-1  | Japonica | NA        |               | Os10g0390100 | OsR498G1018626200.01.T02 | Pumilio homolog 23                                             |
| maker-3-augustus-gene-288.11-mRNA-1 | Japonica | NA        |               | Os10g0389200 | OsR498G1018622600.01.T01 | Red chlorophyll catabolite reductase chloroplastic             |
| maker-3-augustus-gene-288.12-mRNA-1 | Japonica | NA        |               |              |                          | Red chlorophyll catabolite reductase                           |
| maker-3-augustus-gene-288.18-mRNA-1 | Japonica | NA        |               | Os10g0389000 | OsR498G1018621400.01.T02 | Probable calcium-binding protein CML8                          |
| maker-3-augustus-gene-288.2-mRNA-1  | Japonica | NA        | Kinase-LRR-TM | Os10g0389800 | OsR498G1018625400.01.T01 | Strubbelig-receptor family 6                                   |
| maker-3-augustus-gene-288.28-mRNA-1 | Japonica | NA        |               | Os10g0388900 | OsR498G1018621200.01.T02 | Eukaryotic initiation factor 4a (Fragment)                     |
| maker-3-augustus-gene-288.31-mRNA-1 | Japonica | NA        |               |              | OsR498G1221458900.01.T01 | Retrotransposon protein, putative, unclassified, expressed     |
| maker-3-augustus-gene-288.9-mRNA-1  | Japonica | NA        |               |              | OsR498G1018623600.01.T02 | Red chlorophyll catabolite reductase chloroplastic             |
| maker-3-augustus-gene-289.0-mRNA-1  | Japonica | NA        |               | Os10g0387000 | OsR498G1018615200.01.T01 | Ethanolamine-phosphate cytidylyltransferase-like               |
| maker-3-augustus-gene-289.6-mRNA-1  | Japonica | NA        |               |              |                          | ATP-dependent DNA helicase                                     |
| maker-3-augustus-gene-29.45-mRNA-1  | Japonica | NA        |               | Os03g0157700 | OsR498G0305255500.01.T01 |                                                                |
| maker-3-augustus-gene-29.47-mRNA-1  | Japonica | NA        |               |              |                          | HRDC domain-containing protein (Fragment)                      |
| maker-3-augustus-gene-29.53-mRNA-1  | Japonica | NA        |               |              | OsR498G0305256500.01.T01 | DEAD-box ATP-dependent RNA helicase 38                         |
| maker-3-augustus-gene-29.61-mRNA-1  | Japonica | NA        |               | Os03g0159200 | OsR498G0305258100.01.T02 | XS domain containing protein expressed                         |
| maker-3-augustus-gene-29.63-mRNA-1  | Japonica | NA        |               | Os03g0159700 | OsR498G0305259300.01.T06 | Pentatricopeptide repeat-containing protein, mitochondrial     |
| maker-3-augustus-gene-29.65-mRNA-1  | Japonica | NA        | Kinase-TM     | Os03g0160100 | OsR498G0305260500.01.T01 | Serine/threonine-protein kinase EDR1                           |



|                                     |          |        |           |              |                          |                                                                             |
|-------------------------------------|----------|--------|-----------|--------------|--------------------------|-----------------------------------------------------------------------------|
| maker-3-augustus-gene-29.70-mRNA-1  | Japonica | NA     |           | Os03g0158300 |                          | Photosynthetic NDH subunit of subcomplex B 2 chloroplastic                  |
| maker-3-augustus-gene-29.72-mRNA-1  | Japonica | NA     |           | Os03g0158500 | OsR498G0305257000.01.T02 | Evolutionarily conserved C-terminal region 2                                |
| maker-3-augustus-gene-29.78-mRNA-1  | Japonica | NA     |           |              | OsR498G0305257800.01.T03 | Subtilisin-like protease                                                    |
| maker-3-augustus-gene-29.79-mRNA-1  | Japonica | NA     |           | Os03g0159000 |                          | Inhibitor 19 domain-containing protein                                      |
| maker-3-augustus-gene-29.88-mRNA-1  | Japonica | NA     |           | Os03g0159600 | OsR498G0305259200.01.T01 | Late embryogenesis abundant                                                 |
| maker-3-augustus-gene-292.25-mRNA-1 | Japonica | NA     |           | Os10g0384600 | OsR498G1018602400.01.T01 | F-box domain containing protein, expressed                                  |
| maker-3-augustus-gene-292.27-mRNA-1 | Japonica | NA     |           |              | OsR498G0101949000.01.T01 |                                                                             |
| maker-3-augustus-gene-292.31-mRNA-1 | Japonica | NA     |           | Os03g0340600 |                          |                                                                             |
| maker-3-augustus-gene-293.0-mRNA-1  | Japonica | NA     |           |              |                          | F-box domain containing protein                                             |
| maker-3-augustus-gene-294.0-mRNA-1  | Japonica | NA     |           | Os10g0381501 |                          |                                                                             |
| maker-3-augustus-gene-294.2-mRNA-1  | Japonica | NA     |           | Os10g0382300 | OsR498G1018596500.01.T01 | CTLH domain-containing protein                                              |
| maker-3-augustus-gene-294.7-mRNA-1  | Japonica | NA     |           | Os07g0165500 | OsR498G0203722500.01.T01 | Cytokinin inducible protein-like                                            |
| maker-3-augustus-gene-295.37-mRNA-1 | Japonica | NA     |           | Os10g0379100 | OsR498G1018591600.01.T01 | Tryptamine hydroxycinnamoyl transferase                                     |
| maker-3-augustus-gene-295.38-mRNA-1 | Japonica | NA     |           | Os10g0379100 | OsR498G1018590600.01.T01 | Tryptamine hydroxycinnamoyl transferase                                     |
| maker-3-augustus-gene-295.45-mRNA-1 | Japonica | NA     |           | Os10g0379100 | OsR498G1018592300.01.T01 | Tryptamine hydroxycinnamoyl transferase                                     |
| maker-3-augustus-gene-296.23-mRNA-1 | Japonica | NA     |           | Os10g0378100 | OsR498G1018586200.01.T02 | Ent-kaurenoic acid oxidase like                                             |
| maker-3-augustus-gene-296.30-mRNA-1 | Japonica | NA     |           | Os10g0378300 | OsR498G1018586300.01.T01 | Protein CutA, chloroplastic isoform C                                       |
| maker-3-augustus-gene-296.35-mRNA-1 | Japonica | NA     |           | Os10g0378075 |                          |                                                                             |
| maker-3-augustus-gene-297.0-mRNA-1  | Japonica | NA     |           | Os10g0378050 | OsR498G1018586200.01.T02 | Ent-kaurenoic acid oxidase like                                             |
| maker-3-augustus-gene-297.13-mRNA-1 | Japonica | Indica |           | Os03g0188900 | OsR498G1018583100.01.T01 | Homeodomain-leucine zipper transcription factor TaHDZipl-1                  |
| maker-3-augustus-gene-297.3-mRNA-1  | Japonica | NA     |           | Os10g0377800 | OsR498G1018585200.01.T01 | NAD(P)H-hydrate epimerase                                                   |
| maker-3-augustus-gene-3.0-mRNA-1    | Japonica | NA     |           | Os03g0108600 | OsR498G0305096500.01.T01 | DEAD-box ATP-dependent RNA helicase                                         |
| maker-3-augustus-gene-3.12-mRNA-1   | Japonica | NA     |           | Os03g0108901 |                          |                                                                             |
| maker-3-augustus-gene-3.13-mRNA-1   | Japonica | NA     |           | Os03g0109000 | OsR498G0305097500.01.T01 | Vascular related NAC-domain protein 1                                       |
| maker-3-augustus-gene-3.18-mRNA-1   | Japonica | NA     |           | Os03g0109300 | OsR498G0305099300.01.T01 | Cytokinin riboside 5'-monophosphate phosphoribohydrolase                    |
| maker-3-augustus-gene-3.22-mRNA-1   | Japonica | NA     |           | Os03g0109400 | OsR498G0305101300.01.T03 | Rolled leaf2                                                                |
| maker-3-augustus-gene-3.38-mRNA-1   | Japonica | NA     |           | Os03g0108700 | OsR498G0305096800.01.T01 | Aldehyde oxygenase (deformylating)                                          |
| maker-3-augustus-gene-3.4-mRNA-1    | Japonica | Indica | Kinase-TM | Os03g0118400 | OsR498G0305096900.01.T04 | Cell division control protein A                                             |
| maker-3-augustus-gene-3.40-mRNA-1   | Japonica | NA     |           | Os03g0109600 | OsR498G0305101800.01.T01 | Nascent polypeptide-associated complex subunit beta                         |
| maker-3-augustus-gene-3.43-mRNA-1   | Japonica | NA     |           |              |                          | Nascent polypeptide-associated complex subunit beta                         |
| maker-3-augustus-gene-3.45-mRNA-1   | Japonica | NA     |           | Os03g0109700 | OsR498G0305102600.01.T04 | CemA-like proton extrusion protein-related                                  |
| maker-3-augustus-gene-3.50-mRNA-1   | Japonica | NA     |           |              |                          |                                                                             |
| maker-3-augustus-gene-30.0-mRNA-1   | Japonica | NA     |           | Os03g0161000 | OsR498G0305262700.01.T01 |                                                                             |
| maker-3-augustus-gene-30.13-mRNA-1  | Japonica | NA     |           |              |                          | F-box domain-containing protein                                             |
| maker-3-augustus-gene-30.15-mRNA-1  | Japonica | NA     |           | Os03g0161200 | OsR498G0305263600.01.T01 | STA5 domain                                                                 |
| maker-3-augustus-gene-30.4-mRNA-1   | Japonica | NA     |           | Os03g0161100 |                          | NAB domain-containing protein                                               |
| maker-3-augustus-gene-30.7-mRNA-1   | Japonica | NA     |           | Os03g0160400 | OsR498G0305261200.01.T02 | p-loop containing nucleoside triphosphate hydrolases superfamily protein is |
| maker-3-augustus-gene-30.9-mRNA-1   | Japonica | Indica |           | Os10g0422500 | OsR498G0305261600.01.T06 | Type IV inositol polyphosphate 5-phosphatase                                |
| maker-3-augustus-gene-300.0-mRNA-1  | Japonica | NA     |           | Os10g0370800 | OsR498G1018561600.01.T01 | Mannan endo-1,4-beta-mannosidase                                            |
| maker-3-augustus-gene-300.4-mRNA-1  | Japonica | NA     |           | Os10g0370700 | OsR498G1018561400.01.T07 | Putative LeOPT1-oligopeptide transporter                                    |
| maker-3-augustus-gene-300.7-mRNA-1  | Japonica | NA     |           | Os10g0371000 | OsR498G1018562700.01.T01 | Pollen-specific protein C13                                                 |
| maker-3-augustus-gene-301.22-mRNA-1 | Japonica | NA     |           | Os10g0370500 | OsR498G1018560400.01.T01 | Mannan endo-1,4-beta-mannosidase                                            |
| maker-3-augustus-gene-302.0-mRNA-1  | Japonica | NA     |           | Os10g0370000 | OsR498G1018558800.01.T04 | PPM-type phosphatase domain-containing protein                              |
| maker-3-augustus-gene-302.9-mRNA-1  | Japonica | NA     |           | Os10g0368800 | OsR498G1018556410.01.T06 | Pentatricopeptide, putative, expressed                                      |
| maker-3-augustus-gene-303.24-mRNA-1 | Japonica | NA     |           | Os09g0368200 | OsR498G1018555800.01.T01 | Polyamine oxidase                                                           |
| maker-3-augustus-gene-304.8-mRNA-1  | Japonica | NA     |           | Os10g0365800 | OsR498G1018554500.01.T01 |                                                                             |
| maker-3-augustus-gene-308.11-mRNA-1 | Japonica | NA     |           | Os10g0358600 | OsR498G1018527900.01.T01 | Histone deacetylase complex subunit SAP30                                   |
| maker-3-augustus-gene-308.7-mRNA-1  | Japonica | NA     |           | Os10g0358700 | OsR498G1018528200.01.T01 | Pentatricopeptide repeat-containing protein                                 |
| maker-3-augustus-gene-308.9-mRNA-1  | Japonica | NA     |           |              | OsR498G0204226400.01.T01 | Plant disease resistance polypeptide-like                                   |
| maker-3-augustus-gene-31.11-mRNA-1  | Japonica | NA     |           | Os03g0161900 | OsR498G0305270500.01.T08 | Heat shock transcription factor                                             |
| maker-3-augustus-gene-31.19-mRNA-1  | Japonica | NA     |           | Os03g0162200 | OsR498G0305273100.01.T01 | Probable histone H2A variant 1                                              |
| maker-3-augustus-gene-31.21-mRNA-1  | Japonica | Indica |           | Os03g0162800 | OsR498G0305275500.01.T01 | Very-long-chain 3-oxoacyl-CoA synthase                                      |
| maker-3-augustus-gene-310.20-mRNA-1 | Japonica | NA     |           | Os10g0352000 | OsR498G1018524000.01.T01 | TRIO and F-actin-binding protein                                            |
| maker-3-augustus-gene-310.22-mRNA-1 | Japonica | NA     |           | Os10g0351700 | OsR498G1018523500.01.T01 | GH10 domain-containing protein (Fragment)                                   |
| maker-3-augustus-gene-315.15-mRNA-1 | Japonica | NA     |           | Os10g0345900 |                          |                                                                             |
| maker-3-augustus-gene-316.21-mRNA-1 | Japonica | NA     |           | Os10g0345100 | OsR498G1018505600.01.T02 | Protein DETOXIFICATION                                                      |
| maker-3-augustus-gene-316.25-mRNA-1 | Japonica | NA     |           | Os02g0325401 | OsR498G1220897000.01.T02 |                                                                             |
| maker-3-augustus-gene-316.27-mRNA-1 | Japonica | NA     |           | Os10g0345600 | OsR498G1018508100.01.T02 | Qwrf motif-containing protein 2                                             |
| maker-3-augustus-gene-316.32-mRNA-1 | Japonica | NA     |           | Os10g0344900 | OsR498G1018504700.01.T01 | Protein DETOXIFICATION                                                      |
| maker-3-augustus-gene-317.37-mRNA-1 | Japonica | NA     |           | Os10g0344900 | OsR498G1018502800.01.T01 | Protein DETOXIFICATION                                                      |
| maker-3-augustus-gene-317.40-mRNA-1 | Japonica | NA     |           | Os10g0343900 | OsR498G1018501800.01.T05 | Glutaredoxin domain-containing cysteine-rich protein 1                      |

|                                     |          |          |           |              |                          |                                                                            |
|-------------------------------------|----------|----------|-----------|--------------|--------------------------|----------------------------------------------------------------------------|
| maker-3-augustus-gene-317.48-mRNA-1 | Japonica | NA       |           | Os10g0343400 | OsR498G1018500800.01.T01 | Mixed-linked glucan synthase 2                                             |
| maker-3-augustus-gene-317.50-mRNA-1 | Japonica | NA       |           | Os10g0343200 | OsR498G1018500200.01.T01 |                                                                            |
| maker-3-augustus-gene-317.52-mRNA-1 | Japonica | NA       |           | Os10g0343100 | OsR498G1018499900.01.T03 | Syntaxin/t-SNARE family protein                                            |
| maker-3-augustus-gene-318.33-mRNA-1 | Japonica | NA       |           | Os01g0533400 | OsR498G1018495200.01.T02 | Beta-galactosidase 13                                                      |
| maker-3-augustus-gene-318.39-mRNA-1 | Japonica | NA       |           | Os10g0341700 | OsR498G1018496500.01.T02 | Cellulose synthase family protein, expressed                               |
| maker-3-augustus-gene-319.0-mRNA-1  | Japonica | NA       |           |              | OsR498G1018487000.01.T01 | Large secreted protein, putative, expressed                                |
| maker-3-augustus-gene-32.40-mRNA-1  | Japonica | NA       |           | Os03g0163100 | OsR498G0305276100.01.T02 | CASTOR/POLLUX/SYM8 ion channel                                             |
| maker-3-augustus-gene-32.47-mRNA-1  | Japonica | NA       |           | Os03g0163200 | OsR498G0305276300.01.T01 |                                                                            |
| maker-3-augustus-gene-32.49-mRNA-1  | Japonica | NA       |           | Os03g0163300 | OsR498G0305276500.01.T03 | Glutathione reductase, chloroplastic                                       |
| maker-3-augustus-gene-32.54-mRNA-1  | Japonica | NA       |           | Os03g0164700 | OsR498G0305280300.01.T01 | Carbohydrate kinase PfkB                                                   |
| maker-3-augustus-gene-32.57-mRNA-1  | Japonica | Japonica |           | Os03g0163400 | OsR498G0305276800.01.T02 | Altered inheritance of mitochondria protein 24, mitochondrial              |
| maker-3-augustus-gene-32.59-mRNA-1  | Japonica | NA       |           |              |                          | GRF zinc finger family protein, expressed                                  |
| maker-3-augustus-gene-32.61-mRNA-1  | Japonica | Japonica |           | Os03g0164400 | OsR498G0204262300.01.T01 | Transposon protein, putative, unclassified, expressed                      |
| maker-3-augustus-gene-32.63-mRNA-1  | Japonica | NA       |           |              | OsR498G0305280600.01.T01 | Myosin-binding protein 1 isoform X1                                        |
| maker-3-augustus-gene-32.65-mRNA-1  | Japonica | NA       |           | Os03g0165000 | OsR498G0305280800.01.T05 | DNA topoisomerase                                                          |
| maker-3-augustus-gene-32.70-mRNA-1  | Japonica | Japonica |           | Os03g0165100 | OsR498G0305281400.01.T02 | Rf1 protein, mitochondrial, putative                                       |
| maker-3-augustus-gene-320.32-mRNA-1 | Japonica | NA       |           |              |                          | Large secreted protein, putative, expressed                                |
| maker-3-augustus-gene-320.35-mRNA-1 | Japonica | NA       |           | Os02g0777700 | OsR498G0204870100.01.T02 | Opaque endosperm1                                                          |
| maker-3-augustus-gene-321.32-mRNA-1 | Japonica | NA       |           |              | OsR498G1018483400.01.T01 | FAR1 domain-containing protein                                             |
| maker-3-augustus-gene-321.34-mRNA-1 | Japonica | Indica   |           | Os03g0209400 | OsR498G1018481400.01.T02 | Golgi transport 1 protein B                                                |
| maker-3-augustus-gene-321.37-mRNA-1 | Japonica | NA       |           | Os10g0338000 | OsR498G1018482100.01.T01 |                                                                            |
| maker-3-augustus-gene-321.39-mRNA-1 | Japonica | NA       |           | Os10g0337500 | OsR498G1018481100.01.T02 | S-acyltransferase                                                          |
| maker-3-augustus-gene-323.0-mRNA-1  | Japonica | NA       |           | Os10g0331700 | OsR498G1018472400.01.T01 | UDP-glucuronosyl and UDP-glucosyl transferase family protein, expressed    |
| maker-3-augustus-gene-323.2-mRNA-1  | Japonica | NA       |           | Os02g0156100 | OsR498G0202996300.01.T02 | Protein kinase domain-containing protein                                   |
| maker-3-augustus-gene-324.39-mRNA-1 | Japonica | NA       |           |              |                          | UDP-glucuronosyl and UDP-glucosyl transferase family protein, expressed    |
| maker-3-augustus-gene-324.41-mRNA-1 | Japonica | NA       |           |              | OsR498G0408446100.01.T01 | Far-red impaired response-like                                             |
| maker-3-augustus-gene-325.29-mRNA-1 | Japonica | NA       | Kinase-TM | Os10g0329700 | OsR498G1018459800.01.T01 | Receptor-like serine/threonine-protein kinase                              |
| maker-3-augustus-gene-325.34-mRNA-1 | Japonica | NA       |           |              | OsR498G0509715500.01.T01 | Ulp1 protease family, C-terminal catalytic domain containing protein       |
| maker-3-augustus-gene-325.36-mRNA-1 | Japonica | NA       |           |              |                          |                                                                            |
| maker-3-augustus-gene-327.30-mRNA-1 | Japonica | NA       | Kinase-TM | Os10g0327000 | OsR498G1018449400.01.T02 | Receptor-like serine/threonine-protein kinase                              |
| maker-3-augustus-gene-33.35-mRNA-1  | Japonica | Japonica |           | Os03g0165266 | OsR498G0305281500.01.T01 | SNF2 domain-containing protein / helicase domain-containing protein        |
| maker-3-augustus-gene-33.38-mRNA-1  | Japonica | NA       |           | Os03g0165800 | OsR498G0305284300.01.T01 | Vesicle-associated membrane protein 726                                    |
| maker-3-augustus-gene-33.41-mRNA-1  | Japonica | Indica   |           | Os10g0413500 | OsR498G0305285500.01.T01 | Procollagen-proline 4-dioxygenase                                          |
| maker-3-augustus-gene-33.44-mRNA-1  | Japonica | NA       |           | Os03g0165300 | OsR498G0305282000.01.T01 | Benzothiadiazole-induced homeodomain protein 1                             |
| maker-3-augustus-gene-33.46-mRNA-1  | Japonica | NA       |           | Os03g0165400 | OsR498G0305283000.01.T01 | Beta-galactosidase                                                         |
| maker-3-augustus-gene-33.52-mRNA-1  | Japonica | NA       |           |              | OsR498G0305284000.01.T02 | Inactive ubiquitin carboxyl-terminal hydrolase 54                          |
| maker-3-augustus-gene-33.58-mRNA-1  | Japonica | NA       |           | Os03g0165900 | OsR498G0305284600.01.T01 | Protein SULFUR DEFICIENCY-INDUCED like                                     |
| maker-3-augustus-gene-33.60-mRNA-1  | Japonica | Indica   |           | Os03g0166000 | OsR498G0305285000.01.T01 | Alba domain-containing protein                                             |
| maker-3-augustus-gene-33.65-mRNA-1  | Japonica | Indica   |           | Os03g0166600 | OsR498G0305287000.01.T01 | PlsC domain-containing protein (Fragment)                                  |
| maker-3-augustus-gene-330.0-mRNA-1  | Japonica | NA       |           |              |                          | Transposon protein, putative, Mutator sub-class, expressed                 |
| maker-3-augustus-gene-330.12-mRNA-1 | Japonica | NA       |           | Os10g0322250 |                          | Inorganic phosphate transporter 6                                          |
| maker-3-augustus-gene-335.21-mRNA-1 | Japonica | NA       |           |              |                          |                                                                            |
| maker-3-augustus-gene-337.0-mRNA-1  | Japonica | NA       |           |              |                          | Putative ATP synthase subunit                                              |
| maker-3-augustus-gene-338.0-mRNA-1  | Japonica | NA       |           |              |                          |                                                                            |
| maker-3-augustus-gene-339.0-mRNA-1  | Japonica | NA       |           | Os03g0563100 | OsR498G0306381300.01.T01 | L-gulonolactone oxidase                                                    |
| maker-3-augustus-gene-339.2-mRNA-1  | Japonica | NA       |           | Os03g0563600 | OsR498G0306383900.01.T01 | Peroxidase                                                                 |
| maker-3-augustus-gene-339.5-mRNA-1  | Japonica | Indica   |           | Os03g0564200 | OsR498G0306387300.01.T03 | Boron transporter 1-like                                                   |
| maker-3-augustus-gene-339.9-mRNA-1  | Japonica | NA       |           | Os03g0563300 | OsR498G0306382200.01.T01 | Mg-protoporphyrin IX chelatase                                             |
| maker-3-augustus-gene-34.52-mRNA-1  | Japonica | NA       |           | Os03g0166800 | OsR498G0305287500.01.T02 | Carbon catabolite repressor protein 2                                      |
| maker-3-augustus-gene-34.57-mRNA-1  | Japonica | Japonica |           | Os03g0167000 | OsR498G0305287700.01.T02 | AAI domain-containing protein (Fragment)                                   |
| maker-3-augustus-gene-34.59-mRNA-1  | Japonica | NA       |           | Os03g0167400 | OsR498G0305288700.01.T01 | Lipase, putative, expressed                                                |
| maker-3-augustus-gene-34.61-mRNA-1  | Japonica | NA       |           |              | OsR498G0305289500.01.T04 | Receptor y region, transmembrane domain-and RING domain-containing protein |
| maker-3-augustus-gene-34.65-mRNA-1  | Japonica | NA       |           | Os03g0167600 | OsR498G0305289900.01.T01 | Fatty acyl-CoA reductase                                                   |
| maker-3-augustus-gene-34.70-mRNA-1  | Japonica | NA       |           | Os03g0167800 | OsR498G0305290500.01.T01 | Kelch motif family protein, expressed                                      |
| maker-3-augustus-gene-34.72-mRNA-1  | Japonica | NA       |           | Os03g0168000 | OsR498G0305291100.01.T01 | Major facilitator superfamily domain-containing protein 12                 |
| maker-3-augustus-gene-34.75-mRNA-1  | Japonica | NA       |           | Os03g0168200 | OsR498G0305291500.01.T01 | tRNA pseudouridine synthase A, mitochondrial (Fragment)                    |
| maker-3-augustus-gene-34.81-mRNA-1  | Japonica | NA       |           | Os03g0167200 | OsR498G0305288200.01.T05 | IQ domain-containing protein IQM2                                          |
| maker-3-augustus-gene-34.84-mRNA-1  | Japonica | NA       |           | Os03g0805300 | OsR498G0307234100.01.T02 | Serine/threonine-protein phosphatase                                       |
| maker-3-augustus-gene-34.89-mRNA-1  | Japonica | NA       |           | Os03g0168100 | OsR498G0305291400.01.T01 | Embryonic protein DC-8                                                     |
| maker-3-augustus-gene-34.91-mRNA-1  | Japonica | NA       |           | Os03g0168300 | OsR498G0305291800.01.T02 | Pentatricopeptide repeat-containing protein                                |
| maker-3-augustus-gene-34.95-mRNA-1  | Japonica | NA       |           |              | OsR498G0305292600.01.T01 | Thioredoxin-like 1-1 chloroplastic                                         |

|                                     |          |          |           |              |                          |                                                                           |
|-------------------------------------|----------|----------|-----------|--------------|--------------------------|---------------------------------------------------------------------------|
| maker-3-augustus-gene-34.98-mRNA-1  | Japonica | NA       |           |              | OsR498G0305293200.01.T01 | Cytochrome P450 family protein, expressed                                 |
| maker-3-augustus-gene-340.0-mRNA-1  | Japonica | NA       |           | Os03g0565200 | OsR498G0306392300.01.T01 | Haloacid dehalogenase-like hydrolase domain-containing protein isoform X1 |
| maker-3-augustus-gene-340.4-mRNA-1  | Japonica | NA       |           | Os03g0565300 | OsR498G0306392700.01.T06 | PMD domain-containing protein                                             |
| maker-3-augustus-gene-340.6-mRNA-1  | Japonica | NA       |           | Os03g0565500 | OsR498G0306393900.01.T01 | Elongation factor G, mitochondrial                                        |
| maker-3-augustus-gene-341.39-mRNA-1 | Japonica | NA       |           | Os03g0566600 | OsR498G0306396500.01.T02 | Nodulation protein noel                                                   |
| maker-3-augustus-gene-341.41-mRNA-1 | Japonica | NA       |           |              |                          | Tobamovirus multiplication protein 1                                      |
| maker-3-augustus-gene-341.47-mRNA-1 | Japonica | NA       |           | Os03g0565900 | OsR498G0306396000.01.T01 | PMD domain-containing protein                                             |
| maker-3-augustus-gene-341.49-mRNA-1 | Japonica | NA       |           | Os03g0566500 | OsR498G0306396400.01.T01 | La-related protein 7                                                      |
| maker-3-augustus-gene-341.56-mRNA-1 | Japonica | NA       |           | Os03g0567600 | OsR498G0306399600.01.T01 | Glycosyltransferase                                                       |
| maker-3-augustus-gene-342.11-mRNA-1 | Japonica | NA       |           |              | OsR498G0306403600.01.T01 |                                                                           |
| maker-3-augustus-gene-342.3-mRNA-1  | Japonica | NA       | Kinase-TM | Os03g0568800 | OsR498G0306402700.01.T01 | Proline-rich receptor-like protein kinase PERK13                          |
| maker-3-augustus-gene-342.5-mRNA-1  | Japonica | Japonica |           | Os03g0568500 | OsR498G0306402000.01.T03 | Protein FATTY ACID EXPORT like                                            |
| maker-3-augustus-gene-342.8-mRNA-1  | Japonica | NA       |           | Os03g0568900 | OsR498G0306403000.01.T01 | Purple acid phosphatase                                                   |
| maker-3-augustus-gene-343.0-mRNA-1  | Japonica | NA       |           |              | OsR498G0509784600.01.T01 | SANT domain-containing protein                                            |
| maker-3-augustus-gene-343.5-mRNA-1  | Japonica | NA       |           | Os03g0570200 | OsR498G0203772900.01.T07 |                                                                           |
| maker-3-augustus-gene-35.42-mRNA-1  | Japonica | NA       |           | Os03g0168900 | OsR498G0305294100.01.T01 | Ribulose-phosphate 3-epimerase                                            |
| maker-3-augustus-gene-35.44-mRNA-1  | Japonica | NA       |           | Os03g0169100 | OsR498G0305294500.01.T01 | Ribulose-phosphate 3-epimerase, chloroplastic                             |
| maker-3-augustus-gene-35.48-mRNA-1  | Japonica | Indica   |           | Os03g0169500 | OsR498G0305295700.01.T01 | Glucomannan 4-beta-mannosyltransferase                                    |
| maker-3-augustus-gene-35.53-mRNA-1  | Japonica | NA       |           | Os03g0169600 | OsR498G0305296300.01.T01 | Cyclic dof factor 2                                                       |
| maker-3-augustus-gene-35.55-mRNA-1  | Japonica | NA       |           | Os03g0170300 | OsR498G0305297900.01.T02 | 3-dehydroquinate synthase                                                 |
| maker-3-augustus-gene-35.60-mRNA-1  | Japonica | NA       |           | Os03g0169000 | OsR498G0305294400.01.T02 | O-fucosyltransferase family protein (Fragment)                            |
| maker-3-augustus-gene-35.65-mRNA-1  | Japonica | NA       |           | Os03g0169400 | OsR498G0305295600.01.T01 | 50S ribosomal protein L18, chloroplastic                                  |
| maker-3-augustus-gene-35.67-mRNA-1  | Japonica | NA       |           | Os03g0169800 | OsR498G0305296600.01.T05 | HNHc domain-containing protein (Fragment)                                 |
| maker-3-augustus-gene-35.68-mRNA-1  | Japonica | NA       |           | Os03g0169900 | OsR498G0305297000.01.T01 | AvrRpt-cleavage domain-containing protein (Fragment)                      |
| maker-3-augustus-gene-35.71-mRNA-1  | Japonica | NA       |           | Os03g0170200 |                          |                                                                           |
| maker-3-augustus-gene-35.82-mRNA-1  | Japonica | NA       |           |              |                          | Homeobox-leucine zipper protein like                                      |
| maker-3-augustus-gene-35.84-mRNA-1  | Japonica | NA       |           | Os03g0170900 | OsR498G0305302600.01.T03 | Sucrose transporter 6                                                     |
| maker-3-augustus-gene-350.37-mRNA-1 | Japonica | Indica   |           | Os03g0581800 | OsR498G0306451900.01.T03 | 1D-myo-inositol 2-amino-2-deoxy-alpha-D-glucopyranoside ligase            |
| maker-3-augustus-gene-358.2-mRNA-1  | Japonica | NA       |           | Os03g0595200 | OsR498G0306493500.01.T01 | Cysteine synthase 2-like isoform X1                                       |
| maker-3-augustus-gene-359.55-mRNA-1 | Japonica | NA       |           | Os03g0598200 | OsR498G0306503000.01.T01 | Nucleolar protein 14                                                      |
| maker-3-augustus-gene-36.0-mRNA-1   | Japonica | NA       |           | Os03g0171700 | OsR498G0305305500.01.T01 | Transcription factor ILI5                                                 |
| maker-3-augustus-gene-36.10-mRNA-1  | Japonica | NA       |           | Os03g0171300 | OsR498G0305303400.01.T03 | Transcription factor like                                                 |
| maker-3-augustus-gene-36.14-mRNA-1  | Japonica | NA       |           | Os03g0172200 | OsR498G0305306400.01.T01 | Proteinase inhibitor I25, cystatin                                        |
| maker-3-augustus-gene-36.2-mRNA-1   | Japonica | NA       |           | Os03g0171900 | OsR498G0305305900.01.T03 | Alanine-glyoxylate aminotransferase                                       |
| maker-3-augustus-gene-36.7-mRNA-1   | Japonica | NA       |           | Os03g0172000 | OsR498G0305306100.01.T01 | Peptidase S59 domain-containing protein (Fragment)                        |
| maker-3-augustus-gene-361.2-mRNA-1  | Japonica | NA       |           |              |                          | RRM domain-containing protein                                             |
| maker-3-augustus-gene-361.4-mRNA-1  | Japonica | Japonica |           | Os03g0600500 | OsR498G1018781700.01.T01 | Glucan endo-1,3-beta-glucosidase GII                                      |
| maker-3-augustus-gene-364.0-mRNA-1  | Japonica | Japonica |           | Os03g0606100 | OsR498G0306528600.01.T04 | Lipase, putative, expressed                                               |
| maker-3-augustus-gene-366.9-mRNA-1  | Japonica | NA       |           | Os03g0609800 | OsR498G0306545400.01.T01 | BTB/POZ domain-containing protein NPY2                                    |
| maker-3-augustus-gene-37.0-mRNA-1   | Japonica | NA       |           | Os03g0173900 | OsR498G0305309500.01.T04 | E3 ubiquitin-protein ligase BIG BROTHER                                   |
| maker-3-augustus-gene-37.10-mRNA-1  | Japonica | NA       |           | Os03g0174200 | OsR498G0305309900.01.T01 | Polyadenylate-binding protein RBP47B                                      |
| maker-3-augustus-gene-37.13-mRNA-1  | Japonica | Indica   |           | Os03g0174300 | OsR498G0305310300.01.T04 | Putative glucuronoxylan glucuronosyltransferase F8H                       |
| maker-3-augustus-gene-37.18-mRNA-1  | Japonica | NA       |           | Os03g0174600 | OsR498G0305311100.01.T03 | tRNA-5-taurinomethyluridine 2-sulfurtransferase                           |
| maker-3-augustus-gene-37.24-mRNA-1  | Japonica | NA       |           | Os03g0173500 | OsR498G0713747300.01.T07 | Protein-serine/threonine phosphatase                                      |
| maker-3-augustus-gene-37.26-mRNA-1  | Japonica | NA       |           | Os03g0173700 | OsR498G0305308400.01.T02 | RNase H domain-containing protein                                         |
| maker-3-augustus-gene-37.29-mRNA-1  | Japonica | NA       |           | Os03g0174500 | OsR498G0305311000.01.T01 | Adenylosuccinate synthetase, chloroplastic                                |
| maker-3-augustus-gene-37.31-mRNA-1  | Japonica | NA       |           | Os03g0174900 | OsR498G0305311800.01.T01 | CCAAT-binding transcription factor B                                      |
| maker-3-augustus-gene-37.5-mRNA-1   | Japonica | NA       |           | Os03g0174100 | OsR498G0305309700.01.T01 | Polyadenylate-binding protein RBP47B                                      |
| maker-3-augustus-gene-373.5-mRNA-1  | Japonica | Japonica |           | Os03g0623100 | OsR498G0306583300.01.T01 |                                                                           |
| maker-3-augustus-gene-374.0-mRNA-1  | Japonica | Indica   |           | Os03g0624000 | OsR498G0306586700.01.T02 | probable transcription factor KAN4                                        |
| maker-3-augustus-gene-374.2-mRNA-1  | Japonica | NA       |           | Os03g0624600 | OsR498G0306589500.01.T01 | Protein CUP-SHAPED COTYLEDON 2                                            |
| maker-3-augustus-gene-374.8-mRNA-1  | Japonica | Japonica |           | Os03g0625500 | OsR498G0306592200.01.T02 | FBD domain-containing protein                                             |
| maker-3-augustus-gene-375.17-mRNA-1 | Japonica | NA       |           | Os03g0625800 | OsR498G0306593100.01.T03 | Putative E3 ubiquitin-protein ligase ARI2                                 |
| maker-3-augustus-gene-375.19-mRNA-1 | Japonica | Indica   |           | Os03g0626100 | OsR498G0306594300.01.T01 | Putative E3 ubiquitin-protein ligase ARI2                                 |
| maker-3-augustus-gene-375.21-mRNA-1 | Japonica | Japonica |           | Os03g0626100 | OsR498G0306594700.01.T01 | Putative E3 ubiquitin-protein ligase ARI1                                 |
| maker-3-augustus-gene-375.23-mRNA-1 | Japonica | NA       |           |              | OsR498G0306595700.01.T05 | Inositol polyphosphate 5-phosphatase                                      |
| maker-3-augustus-gene-375.29-mRNA-1 | Japonica | NA       |           | Os03g0626600 | OsR498G0306596100.01.T06 | LIM zinc-binding domain-containing protein                                |
| maker-3-augustus-gene-375.31-mRNA-1 | Japonica | NA       |           |              | OsR498G0306593000.01.T01 | Exocyst complex                                                           |
| maker-3-augustus-gene-375.39-mRNA-1 | Japonica | NA       |           | Os03g0625900 | OsR498G0306593400.01.T01 | U3 snoRNP-associated protein-like YAOH                                    |
| maker-3-augustus-gene-375.41-mRNA-1 | Japonica | NA       |           | Os03g0626700 | OsR498G0306597000.01.T01 | Protein DETOXIFICATION                                                    |
| maker-3-augustus-gene-376.34-mRNA-1 | Japonica | NA       |           | Os03g0626800 | OsR498G0306597900.01.T01 | Calcineurin B                                                             |

|                                     |          |          |           |              |                          |                                                                             |
|-------------------------------------|----------|----------|-----------|--------------|--------------------------|-----------------------------------------------------------------------------|
| maker-3-augustus-gene-376.41-mRNA-1 | Japonica | NA       |           |              | OsR498G0306598900.01.T04 | Iron-sulfur protein NUBPL                                                   |
| maker-3-augustus-gene-377.38-mRNA-1 | Japonica | NA       |           | Os03g0628800 | OsR498G0306604300.01.T01 | Toxin PezT                                                                  |
| maker-3-augustus-gene-377.41-mRNA-1 | Japonica | NA       |           |              | OsR498G0306608300.01.T01 |                                                                             |
| maker-3-augustus-gene-377.42-mRNA-1 | Japonica | NA       |           | Os03g0628900 | OsR498G0306604800.01.T01 | Prefoldin subunit 4                                                         |
| maker-3-augustus-gene-377.44-mRNA-1 | Japonica | NA       |           |              | OsR498G0306607400.01.T01 | F-box domain-containing protein (Fragment)                                  |
| maker-3-augustus-gene-378.36-mRNA-1 | Japonica | Indica   |           | Os12g0600200 | OsR498G0306609600.01.T01 | E3 ubiquitin protein ligase DRIP2                                           |
| maker-3-augustus-gene-379.26-mRNA-1 | Japonica | NA       |           | Os03g0633400 | OsR498G0306610500.01.T02 | F-box/LRR-repeat protein 17-like isoform X1                                 |
| maker-3-augustus-gene-379.31-mRNA-1 | Japonica | NA       |           | Os03g0633800 | OsR498G0306611700.01.T01 | Auxin-responsive protein IAA12                                              |
| maker-3-augustus-gene-379.33-mRNA-1 | Japonica | NA       |           | Os03g0633500 | OsR498G0306610800.01.T01 | Auxin-responsive protein IAA11                                              |
| maker-3-augustus-gene-379.35-mRNA-1 | Japonica | NA       |           | Os03g0633900 | OsR498G0306612000.01.T01 | Primosome PriB/single-strand DNA-binding protein                            |
| maker-3-augustus-gene-379.39-mRNA-1 | Japonica | NA       |           | Os03g0634000 | OsR498G0306612400.01.T01 | Sec-independent protein translocase protein Tata                            |
| maker-3-augustus-gene-379.41-mRNA-1 | Japonica | NA       |           | Os03g0635100 |                          | GTP binding protein gamma subunit                                           |
| maker-3-augustus-gene-379.43-mRNA-1 | Japonica | Indica   |           | Os03g0635800 | OsR498G0306615200.01.T01 | VAN3-binding protein isoform X4                                             |
| maker-3-augustus-gene-38.0-mRNA-1   | Japonica | Indica   |           | Os03g0175600 | OsR498G0305315100.01.T01 | Nitrilase/cyanide hydratase and apolipoprotein N-acyltransferase family pro |
| maker-3-augustus-gene-38.14-mRNA-1  | Japonica | NA       |           | Os03g0177300 | OsR498G0305320100.01.T04 | RING-type E3 ubiquitin transferase                                          |
| maker-3-augustus-gene-38.18-mRNA-1  | Japonica | NA       |           | Os03g0177400 | OsR498G0305320300.01.T01 | Elongation factor 1-alpha                                                   |
| maker-3-augustus-gene-38.19-mRNA-1  | Japonica | NA       |           | Os03g0177500 | OsR498G0305320300.01.T04 | Elongation factor 1-alpha                                                   |
| maker-3-augustus-gene-38.24-mRNA-1  | Japonica | NA       |           |              | OsR498G0305317800.01.T02 | AP2-EREBP-type transcription factor                                         |
| maker-3-augustus-gene-38.26-mRNA-1  | Japonica | NA       |           | Os03g0176600 | OsR498G0305318800.01.T01 | Protein kinase domain-containing protein                                    |
| maker-3-augustus-gene-38.29-mRNA-1  | Japonica | Japonica |           | Os03g0176800 | OsR498G0305319000.01.T02 | Cupin type-1 domain-containing protein                                      |
| maker-3-augustus-gene-38.34-mRNA-1  | Japonica | Indica   |           | Os09g0357250 | OsR498G0305320000.01.T01 | Zinc finger protein ZFPM2                                                   |
| maker-3-augustus-gene-38.5-mRNA-1   | Japonica | Japonica |           | Os03g0176100 | OsR498G1018648800.01.T04 | Transcription initiation factor IIE subunit beta                            |
| maker-3-augustus-gene-38.8-mRNA-1   | Japonica | NA       |           | Os03g0177000 | OsR498G0305319700.01.T01 | Acyl-CoA N-acyltransferase (NAT) superfamily protein                        |
| maker-3-augustus-gene-380.20-mRNA-1 | Japonica | NA       |           | Os09g0401600 | OsR498G0917411600.01.T01 | Plant UBX domain-containing protein 2                                       |
| maker-3-augustus-gene-380.24-mRNA-1 | Japonica | Japonica |           | Os03g0636700 | OsR498G1222064900.01.T01 | IQ motif, EF-hand binding site                                              |
| maker-3-augustus-gene-380.27-mRNA-1 | Japonica | Indica   | Kinase-TM | Os12g0604700 | OsR498G0306621200.01.T01 | Serine/threonine-protein kinase Nek2                                        |
| maker-3-augustus-gene-381.0-mRNA-1  | Japonica | NA       |           | Os03g0638200 | OsR498G0306626300.01.T08 | Organic cation/carnitine transporter 7                                      |
| maker-3-augustus-gene-381.11-mRNA-1 | Japonica | NA       |           |              |                          | CRC domain-containing protein TSO1 isoform X1                               |
| maker-3-augustus-gene-381.5-mRNA-1  | Japonica | Indica   | Kinase    | Os12g0605900 | OsR498G0306628100.01.T01 | Serinethreonine-protein kinase sty17                                        |
| maker-3-augustus-gene-381.8-mRNA-1  | Japonica | NA       |           |              | OsR498G0306624800.01.T01 | NAB domain-containing protein                                               |
| maker-3-augustus-gene-382.0-mRNA-1  | Japonica | NA       |           |              | OsR498G0306632300.01.T02 | DIRP family protein, expressed                                              |
| maker-3-augustus-gene-382.11-mRNA-1 | Japonica | NA       |           | Os03g0639600 | OsR498G0306636000.01.T01 | LSD1-type zinc finger protein                                               |
| maker-3-augustus-gene-382.5-mRNA-1  | Japonica | NA       |           | Os03g0639300 | OsR498G0306633100.01.T01 | Transcription factor PIF1 (Fragment)                                        |
| maker-3-augustus-gene-382.6-mRNA-1  | Japonica | Indica   |           | Os12g0610200 | OsR498G0306633100.01.T01 | transcription factor PHYTOCHROME INTERACTING FACTOR-LIKE 13-like isofo      |
| maker-3-augustus-gene-383.28-mRNA-1 | Japonica | NA       |           | Os03g0639700 | OsR498G0306637300.01.T02 | DNA repair protein recA, chloroplastic                                      |
| maker-3-augustus-gene-383.32-mRNA-1 | Japonica | NA       |           | Os03g0639800 | OsR498G0306637600.01.T01 | Vacuolar protein sorting-associated protein 2 like 2                        |
| maker-3-augustus-gene-383.38-mRNA-1 | Japonica | Indica   |           | Os03g0640100 | OsR498G0306639600.01.T02 | Histone-binding protein MS1                                                 |
| maker-3-augustus-gene-383.39-mRNA-1 | Japonica | NA       |           | Os03g0640100 | OsR498G0306639600.01.T03 | Histone-binding protein MS1                                                 |
| maker-3-augustus-gene-383.46-mRNA-1 | Japonica | Japonica |           | Os03g0640200 | OsR498G0306640800.01.T01 | KxDL motif-containing protein 1                                             |
| maker-3-augustus-gene-383.48-mRNA-1 | Japonica | NA       |           |              | OsR498G0306640000.01.T03 | PIG-P domain-containing protein                                             |
| maker-3-augustus-gene-383.50-mRNA-1 | Japonica | NA       |           | Os03g0640400 | OsR498G0306640800.01.T01 | KxDL motif-containing protein 1                                             |
| maker-3-augustus-gene-383.52-mRNA-1 | Japonica | NA       |           | Os03g0640800 | OsR498G0306641800.01.T01 | Homeobox-leucine zipper protein ATHB-14                                     |
| maker-3-augustus-gene-384.33-mRNA-1 | Japonica | NA       |           | Os03g0641500 | OsR498G0306646300.01.T01 |                                                                             |
| maker-3-augustus-gene-384.35-mRNA-1 | Japonica | NA       |           | Os03g0641700 | OsR498G0306647100.01.T03 | Mediator of RNA polymerase II transcription subunit 19a                     |
| maker-3-augustus-gene-384.39-mRNA-1 | Japonica | NA       |           | Os03g0641200 | OsR498G0306643800.01.T01 | High affinity cationic amino acid transporter 1                             |
| maker-3-augustus-gene-384.41-mRNA-1 | Japonica | Indica   |           | Os12g0613250 | OsR498G0306644400.01.T01 | BTB/POZ domain-containing protein At1g30440                                 |
| maker-3-augustus-gene-384.43-mRNA-1 | Japonica | NA       | Kinase-TM |              | OsR498G0306653000.01.T01 | Wall-associated receptor kinase 5                                           |
| maker-3-augustus-gene-385.33-mRNA-1 | Japonica | NA       |           | Os03g0644000 | OsR498G0306653900.01.T03 | Beclin 1 protein (Fragment)                                                 |
| maker-3-augustus-gene-385.37-mRNA-1 | Japonica | NA       |           | Os03g0642900 | OsR498G0306651200.01.T03 | Phosphonate metabolism protein, putative                                    |
| maker-3-augustus-gene-385.42-mRNA-1 | Japonica | NA       |           | Os03g0643100 | OsR498G0713408500.01.T01 | WAC domain-containing protein                                               |
| maker-3-augustus-gene-385.45-mRNA-1 | Japonica | NA       | Kinase-TM | Os03g0643250 |                          | Phosphonate metabolism protein, putative                                    |
| maker-3-augustus-gene-385.49-mRNA-1 | Japonica | NA       |           | Os03g0643300 | OsR498G0306653600.01.T01 | Ornithine--oxo-acid aminotransferase                                        |
| maker-3-augustus-gene-385.55-mRNA-1 | Japonica | NA       |           | Os03g0643900 |                          |                                                                             |
| maker-3-augustus-gene-385.56-mRNA-1 | Japonica | NA       |           | Os03g0644400 | OsR498G0306655000.01.T01 | Proline transporter                                                         |
| maker-3-augustus-gene-386.0-mRNA-1  | Japonica | NA       |           | Os03g0645000 | OsR498G0306657300.01.T02 | Beta-expansin 4                                                             |
| maker-3-augustus-gene-386.6-mRNA-1  | Japonica | Indica   |           | Os03g0645100 | OsR498G0306657700.01.T01 | Pyruvate dehydrogenase (acetyl-transferring)                                |
| maker-3-augustus-gene-386.8-mRNA-1  | Japonica | Indica   |           | Os12g0617100 | OsR498G0306658000.01.T01 | Translation initiation factor eIF-2B delta subunit                          |
| maker-3-augustus-gene-387.0-mRNA-1  | Japonica | NA       |           | Os03g0646100 | OsR498G0306664100.01.T01 | Tubulin GTPase                                                              |
| maker-3-augustus-gene-387.14-mRNA-1 | Japonica | NA       |           | Os03g0646400 | OsR498G0306664800.01.T03 | EXPERA domain-containing protein (Fragment)                                 |
| maker-3-augustus-gene-387.16-mRNA-1 | Japonica | Indica   |           | Os12g0617900 | OsR498G0306665600.01.T01 | Serine/threonine-protein phosphatase                                        |
| maker-3-augustus-gene-387.24-mRNA-1 | Japonica | NA       |           | Os03g0647600 | OsR498G0306667600.01.T01 | CCAAT-binding transcription factor B                                        |

|                                     |          |          |           |              |                          |                                                                            |
|-------------------------------------|----------|----------|-----------|--------------|--------------------------|----------------------------------------------------------------------------|
| maker-3-augustus-gene-387.7-mRNA-1  | Japonica | NA       |           |              | OsR498G0306665300.01.T05 | DNA-directed RNA polymerase subunit beta                                   |
| maker-3-augustus-gene-388.14-mRNA-1 | Japonica | NA       |           | Os03g0648500 | OsR498G0306670600.01.T01 | Phytoecyanin domain-containing protein                                     |
| maker-3-augustus-gene-388.16-mRNA-1 | Japonica | Indica   |           | Os12g0620600 | OsR498G0306672200.01.T01 | C2 NT-type domain-containing protein                                       |
| maker-3-augustus-gene-388.4-mRNA-1  | Japonica | NA       |           | Os03g0648900 | OsR498G0306671900.01.T01 | 5'-nucleotidase                                                            |
| maker-3-augustus-gene-388.6-mRNA-1  | Japonica | NA       |           | Os03g0647800 | OsR498G0306669200.01.T01 | CSL zinc finger domain-containing protein                                  |
| maker-3-augustus-gene-388.8-mRNA-1  | Japonica | Japonica |           | Os03g0648300 | OsR498G0306670200.01.T01 | IQ calmodulin-binding motif family protein, expressed                      |
| maker-3-augustus-gene-389.13-mRNA-1 | Japonica | NA       |           | Os03g0651000 | OsR498G0306681100.01.T01 | Glutamyl-tRNA(Gln) amidotransferase subunit C, chloroplastic/mitochondrial |
| maker-3-augustus-gene-39.0-mRNA-1   | Japonica | NA       |           | Os03g0177900 | OsR498G0305321100.01.T01 | Elongation factor 1-alpha                                                  |
| maker-3-augustus-gene-39.11-mRNA-1  | Japonica | NA       | Kinase-TM | Os03g0179400 | OsR498G0305326300.01.T01 | Serine/threonine-protein kinase RIPK                                       |
| maker-3-augustus-gene-39.15-mRNA-1  | Japonica | NA       |           | Os03g0179900 | OsR498G0305327300.01.T01 | Lipoxygenase                                                               |
| maker-3-augustus-gene-39.19-mRNA-1  | Japonica | NA       |           | Os03g0180300 | OsR498G0305328700.01.T05 | Smr domain-containing protein                                              |
| maker-3-augustus-gene-39.2-mRNA-1   | Japonica | NA       |           | Os03g0178000 | OsR498G0305321500.01.T02 | Elongation factor 1-alpha                                                  |
| maker-3-augustus-gene-39.23-mRNA-1  | Japonica | NA       |           |              | OsR498G0305321800.01.T02 | Putative copper-transporting ATPase PAA1                                   |
| maker-3-augustus-gene-39.30-mRNA-1  | Japonica | NA       |           | Os03g0178300 | OsR498G0305322600.01.T01 | AB hydrolase-1 domain-containing protein (Fragment)                        |
| maker-3-augustus-gene-39.32-mRNA-1  | Japonica | NA       |           | Os03g0178400 | OsR498G0305322800.01.T02 | AB hydrolase-1 domain-containing protein (Fragment)                        |
| maker-3-augustus-gene-39.36-mRNA-1  | Japonica | NA       |           | Os03g0178500 | OsR498G0305323000.01.T01 | 2-hydroxy-6-oxononadienedioate/2-hydroxy-6-oxononatrienedioate hydrolase   |
| maker-3-augustus-gene-39.4-mRNA-1   | Japonica | NA       |           | Os03g0178200 | OsR498G0305322300.01.T01 | ylmG homolog protein 2, chloroplastic                                      |
| maker-3-augustus-gene-39.40-mRNA-1  | Japonica | NA       |           | Os03g0179700 | OsR498G0305326600.01.T01 | LURP1-related protein domain containing protein                            |
| maker-3-augustus-gene-39.6-mRNA-1   | Japonica | NA       |           |              |                          | Tubulin--tyrosine ligase-like protein 12                                   |
| maker-3-augustus-gene-390.36-mRNA-1 | Japonica | Japonica |           | Os03g0651800 | OsR498G0102706900.01.T02 | Germin-like protein 1-3                                                    |
| maker-3-augustus-gene-390.38-mRNA-1 | Japonica | NA       |           | Os03g0652100 | OsR498G0306685700.01.T01 | General negative regulator of transcription subunit 3 isoform X2           |
| maker-3-augustus-gene-390.42-mRNA-1 | Japonica | Indica   |           | Os03g0651100 | OsR498G0306681400.01.T01 | UBA domain-containing protein                                              |
| maker-3-augustus-gene-390.49-mRNA-1 | Japonica | NA       |           | Os03g0651300 | OsR498G0306682200.01.T01 | Plasma-membrane choline transporter family protein                         |
| maker-3-augustus-gene-390.53-mRNA-1 | Japonica | NA       |           |              | OsR498G0306690300.01.T01 | F-box domain-containing protein (Fragment)                                 |
| maker-3-augustus-gene-390.54-mRNA-1 | Japonica | Indica   |           | Os03g0652100 | OsR498G0306688600.01.T01 | Transcription regulator NOT2/NOT3/NOT5 family protein                      |
| maker-3-augustus-gene-390.56-mRNA-1 | Japonica | NA       |           |              | OsR498G0306688800.01.T03 | AAI domain-containing protein                                              |
| maker-3-augustus-gene-391.28-mRNA-1 | Japonica | NA       |           | Os03g0653900 | OsR498G0306691400.01.T02 | rRNA N-glycosidase                                                         |
| maker-3-augustus-gene-392.39-mRNA-1 | Japonica | NA       |           | Os03g0654500 | OsR498G0306694000.01.T02 | High affinity cationic amino acid transporter 1                            |
| maker-3-augustus-gene-392.45-mRNA-1 | Japonica | NA       |           |              | OsR498G0306694200.01.T02 | Protein PHOSPHATE STARVATION RESPONSE 3                                    |
| maker-3-augustus-gene-392.50-mRNA-1 | Japonica | NA       |           |              | OsR498G0306694400.01.T02 | Chlorophyllide b reductase NOLic isoform X2                                |
| maker-3-augustus-gene-399.52-mRNA-1 | Japonica | NA       |           | Os05g0394100 |                          | Glutathione S-transferase T3-like                                          |
| maker-3-augustus-gene-4.0-mRNA-1    | Japonica | NA       |           |              | OsR498G0305105100.01.T01 | LysM domain containing protein, expressed                                  |
| maker-3-augustus-gene-4.16-mRNA-1   | Japonica | NA       |           | Os03g0111500 | OsR498G0305107700.01.T01 | Valyl-tRNA synthetase                                                      |
| maker-3-augustus-gene-4.19-mRNA-1   | Japonica | NA       |           | Os03g0694900 | OsR498G0306856700.01.T01 | Valyl-tRNA synthetase                                                      |
| maker-3-augustus-gene-4.28-mRNA-1   | Japonica | NA       |           | Os03g0111800 | OsR498G0305108300.01.T02 | Transducin family protein / WD-40 repeat family protein                    |
| maker-3-augustus-gene-4.3-mRNA-1    | Japonica | NA       |           | Os03g0110800 | OsR498G0305105900.01.T02 | DNA (cytosine-5)-methyltransferase DRM2                                    |
| maker-3-augustus-gene-4.34-mRNA-1   | Japonica | NA       |           |              |                          | AP-2 complex subunit alpha                                                 |
| maker-3-augustus-gene-4.40-mRNA-1   | Japonica | NA       |           | Os03g0111100 | OsR498G0305106600.01.T02 | Folylpoly-gamma-glutamate synthetase                                       |
| maker-3-augustus-gene-4.48-mRNA-1   | Japonica | NA       |           | Os03g0111200 | OsR498G0305107000.01.T01 | Remorin                                                                    |
| maker-3-augustus-gene-4.51-mRNA-1   | Japonica | Japonica |           | Os03g0111400 | OsR498G0305107600.01.T01 | Heavy-metal-associated domain-containing protein, putative, expressed      |
| maker-3-augustus-gene-4.54-mRNA-1   | Japonica | NA       |           | Os03g0111600 | OsR498G0305108000.01.T01 | DUF1618 domain-containing protein (Fragment)                               |
| maker-3-augustus-gene-4.9-mRNA-1    | Japonica | NA       |           |              | OsR498G0305106100.01.T08 | Stress responsive alpha-beta barrel                                        |
| maker-3-augustus-gene-40.35-mRNA-1  | Japonica | NA       |           | Os03g0180900 | OsR498G0305330900.01.T01 | Tify domain-containing protein (Fragment)                                  |
| maker-3-augustus-gene-40.37-mRNA-1  | Japonica | NA       |           | Os03g0181500 | OsR498G0305333900.01.T01 | Very-long-chain 3-oxoacyl-CoA synthase                                     |
| maker-3-augustus-gene-40.40-mRNA-1  | Japonica | NA       |           | Os03g0181600 |                          |                                                                            |
| maker-3-augustus-gene-40.42-mRNA-1  | Japonica | NA       |           |              | OsR498G0305334900.01.T01 | Multidrug/pheromone exporter, MDR family, ABC transporter family           |
| maker-3-augustus-gene-40.44-mRNA-1  | Japonica | NA       |           |              | OsR498G0305335100.01.T01 | Multidrug/pheromone exporter, MDR family, ABC transporter family           |
| maker-3-augustus-gene-40.46-mRNA-1  | Japonica | NA       |           | Os03g0181800 | OsR498G0305335900.01.T04 | DUF936 domain-containing protein                                           |
| maker-3-augustus-gene-40.48-mRNA-1  | Japonica | NA       |           | Os03g0180400 | OsR498G0305329000.01.T01 | Proteasome endopeptidase complex                                           |
| maker-3-augustus-gene-40.53-mRNA-1  | Japonica | NA       |           |              | OsR498G0612787000.01.T03 | UDP-glycosyltransferase TURAN                                              |
| maker-3-augustus-gene-401.6-mRNA-1  | Japonica | Indica   |           | Os03g0670700 | OsR498G0306764900.01.T01 | Glycine-rich RNA-binding protein GRP1A                                     |
| maker-3-augustus-gene-402.0-mRNA-1  | Japonica | NA       |           | Os03g0671800 | OsR498G0306767000.01.T01 | Transcription factor bHLH28                                                |
| maker-3-augustus-gene-402.11-mRNA-1 | Japonica | NA       |           |              | OsR498G0306769800.01.T02 | Myb-like protein O                                                         |
| maker-3-augustus-gene-402.2-mRNA-1  | Japonica | NA       |           | Os03g0672300 | OsR498G0306768400.01.T02 | Pyruvate kinase                                                            |
| maker-3-augustus-gene-402.5-mRNA-1  | Japonica | NA       |           | Os03g0672400 | OsR498G0306768800.01.T01 | Pyruvate kinase                                                            |
| maker-3-augustus-gene-402.9-mRNA-1  | Japonica | NA       |           |              | OsR498G0306769200.01.T01 | EPIDERMAL PATTERNING FACTOR-like protein 2                                 |
| maker-3-augustus-gene-403.0-mRNA-1  | Japonica | NA       |           | Os03g0672900 | OsR498G0306771100.01.T01 | GH10 domain-containing protein (Fragment)                                  |
| maker-3-augustus-gene-403.12-mRNA-1 | Japonica | NA       |           | Os03g0847401 |                          | HAT family dimerisation domain containing protein                          |
| maker-3-augustus-gene-403.14-mRNA-1 | Japonica | NA       |           |              | OsR498G0306773600.01.T01 | KNOTTED1 homeodomain protein (Fragment)                                    |
| maker-3-augustus-gene-403.16-mRNA-1 | Japonica | Indica   |           | Os03g0673800 | OsR498G0306774000.01.T03 | Expressed protein (With alternative splicing)                              |
| maker-3-augustus-gene-403.2-mRNA-1  | Japonica | Indica   |           | Os03g0125800 | OsR498G0306774900.01.T01 | DUF21 domain-containing protein isoform A                                  |

|                                     |          |          |               |              |                          |                                                                          |
|-------------------------------------|----------|----------|---------------|--------------|--------------------------|--------------------------------------------------------------------------|
| maker-3-augustus-gene-403.8-mRNA-1  | Japonica | NA       |               |              | OsR498G0306771400.01.T01 | Homeotic protein knotted-1                                               |
| maker-3-augustus-gene-404.43-mRNA-1 | Japonica | NA       |               | Os03g0674700 | OsR498G0306775700.01.T01 | Growth-regulating factor 9                                               |
| maker-3-augustus-gene-404.46-mRNA-1 | Japonica | NA       |               | Os03g0675600 | OsR498G0306779900.01.T01 | Phytosulfokine-alpha                                                     |
| maker-3-augustus-gene-404.48-mRNA-1 | Japonica | NA       |               |              |                          |                                                                          |
| maker-3-augustus-gene-404.50-mRNA-1 | Japonica | Japonica |               | Os03g0675300 | OsR498G0306777400.01.T01 | Proline synthase co-transcribed bacterial homolog protein                |
| maker-3-augustus-gene-405.0-mRNA-1  | Japonica | NA       |               |              | OsR498G0306786700.01.T02 | rRNA N-glycosidase                                                       |
| maker-3-augustus-gene-405.3-mRNA-1  | Japonica | NA       |               | Os03g0678400 | OsR498G0306792100.01.T02 | RING finger protein 5                                                    |
| maker-3-augustus-gene-406.0-mRNA-1  | Japonica | NA       |               | Os01g0144300 | OsR498G0100163200.01.T01 |                                                                          |
| maker-3-augustus-gene-406.14-mRNA-1 | Japonica | NA       |               | Os01g0233900 | OsR498G0100477300.01.T01 | UBC core domain-containing protein (Fragment)                            |
| maker-3-augustus-gene-406.3-mRNA-1  | Japonica | NA       |               | Os03g0679800 | OsR498G0306798700.01.T01 | Ankyrin repeat family protein                                            |
| maker-3-augustus-gene-406.8-mRNA-1  | Japonica | NA       |               | Os03g0679000 | OsR498G0306795400.01.T03 | Glucose-induced degradation protein 4                                    |
| maker-3-augustus-gene-407.26-mRNA-1 | Japonica | Japonica |               | Os03g0680100 | OsR498G0306798700.01.T01 | TPR Domain containing protein, expressed                                 |
| maker-3-augustus-gene-407.30-mRNA-1 | Japonica | NA       |               | Os03g0680200 | OsR498G0306799900.01.T02 | TPR Domain containing protein, expressed                                 |
| maker-3-augustus-gene-407.35-mRNA-1 | Japonica | Japonica |               | Os03g0680700 | OsR498G0306801400.01.T01 | Homeodomain transcription factor                                         |
| maker-3-augustus-gene-407.38-mRNA-1 | Japonica | NA       |               | Os03g0680800 | OsR498G0306802400.01.T06 | Benzo[thiadiazole]-induced homeodomain protein 1                         |
| maker-3-augustus-gene-408.28-mRNA-1 | Japonica | NA       |               |              | OsR498G0306805100.01.T01 | Golgi-body localization protein domain                                   |
| maker-3-augustus-gene-408.36-mRNA-1 | Japonica | NA       |               | Os03g0681700 | OsR498G0306805900.01.T03 | Target of rapamycin complex subunit LST8                                 |
| maker-3-augustus-gene-408.41-mRNA-1 | Japonica | Indica   |               | Os04g0485100 | OsR498G0306806200.01.T02 | Serine/threonine protein phosphatase 2A regulatory subunit               |
| maker-3-augustus-gene-408.43-mRNA-1 | Japonica | NA       |               | Os03g0681900 | OsR498G0306806600.01.T01 | Glycine-rich RNA-binding protein RZ1C                                    |
| maker-3-augustus-gene-409.36-mRNA-1 | Japonica | NA       |               |              |                          | MHD1 domain-containing protein                                           |
| maker-3-augustus-gene-409.42-mRNA-1 | Japonica | NA       |               | Os03g0683800 | OsR498G0306812100.01.T01 | Gdsl esterase lipase                                                     |
| maker-3-augustus-gene-409.44-mRNA-1 | Japonica | NA       |               | Os03g0682600 |                          | Argonaute 5                                                              |
| maker-3-augustus-gene-41.36-mRNA-1  | Japonica | NA       |               |              | OsR498G0305336100.01.T01 | Flavin-containing monooxygenase                                          |
| maker-3-augustus-gene-41.39-mRNA-1  | Japonica | NA       |               | Os03g0182400 | OsR498G0305336500.01.T02 | SAC domain-containing protein                                            |
| maker-3-augustus-gene-41.53-mRNA-1  | Japonica | Indica   |               | Os07g0616600 | OsR498G0305337000.01.T01 | 40S ribosomal protein SA                                                 |
| maker-3-augustus-gene-41.57-mRNA-1  | Japonica | NA       |               | Os03g0182700 | OsR498G0305337200.01.T01 | Eukaryotic translation initiation factor 3 subunit K                     |
| maker-3-augustus-gene-41.60-mRNA-1  | Japonica | NA       |               | Os03g0182800 | OsR498G0305337400.01.T01 | Ethylene-responsive transcription factor                                 |
| maker-3-augustus-gene-41.63-mRNA-1  | Japonica | NA       |               | Os03g0183000 | OsR498G0305337800.01.T02 | Jasmonic acid and ethylene responsive factor                             |
| maker-3-augustus-gene-41.65-mRNA-1  | Japonica | NA       |               | Os03g0183100 | OsR498G0305338600.01.T05 | SAP-like protein BP-73                                                   |
| maker-3-augustus-gene-41.66-mRNA-1  | Japonica | NA       |               | Os03g0183500 | OsR498G0305340600.01.T01 | FLZ-type domain-containing protein                                       |
| maker-3-augustus-gene-41.68-mRNA-1  | Japonica | Indica   |               | Os10g0390500 | OsR498G0305341400.01.T04 | Alanine aminotransferase                                                 |
| maker-3-augustus-gene-410.0-mRNA-1  | Japonica | NA       |               | Os03g0684300 | OsR498G0306813500.01.T01 | OB-fold nucleic acid binding domain containing protein, expressed        |
| maker-3-augustus-gene-410.13-mRNA-1 | Japonica | NA       |               | Os03g0685000 | OsR498G0306815500.01.T03 | Ferredoxin                                                               |
| maker-3-augustus-gene-410.17-mRNA-1 | Japonica | NA       |               | Os03g0685100 | OsR498G0306815700.01.T01 | Putative 23S rRNA (Guanosine(2251)-2'-O)-methyltransferase               |
| maker-3-augustus-gene-410.19-mRNA-1 | Japonica | NA       |               | Os03g0685300 | OsR498G0306817500.01.T01 | Gamma-glutamyl peptidase                                                 |
| maker-3-augustus-gene-410.29-mRNA-1 | Japonica | NA       |               |              | OsR498G0306812400.01.T02 | HECT domain-containing protein (Fragment)                                |
| maker-3-augustus-gene-410.3-mRNA-1  | Japonica | NA       |               | Os03g0684400 | OsR498G0306813700.01.T02 | Magnesium transporter                                                    |
| maker-3-augustus-gene-410.34-mRNA-1 | Japonica | NA       |               | Os03g0683900 | OsR498G0306812600.01.T02 | Ubiquitin-protein ligase E3 B                                            |
| maker-3-augustus-gene-410.37-mRNA-1 | Japonica | NA       |               | Os03g0684000 | OsR498G0306812800.01.T01 | GATA transcription factor                                                |
| maker-3-augustus-gene-410.41-mRNA-1 | Japonica | NA       |               | Os03g0684100 | OsR498G0306813400.01.T01 | ARM repeat superfamily protein                                           |
| maker-3-augustus-gene-410.47-mRNA-1 | Japonica | NA       |               | Os03g0684700 | OsR498G0306815000.01.T01 | HPP family protein, expressed                                            |
| maker-3-augustus-gene-410.49-mRNA-1 | Japonica | NA       |               | Os03g0685500 | OsR498G0306818600.01.T01 | CHCH domain containing protein, expressed                                |
| maker-3-augustus-gene-410.53-mRNA-1 | Japonica | NA       |               | Os03g0685600 | OsR498G0306818800.01.T02 | Angio-associated migratory cell protein isoform X2                       |
| maker-3-augustus-gene-410.9-mRNA-1  | Japonica | NA       |               | Os03g0684500 | OsR498G0306814500.01.T01 | Glycosyltransferase family protein 47                                    |
| maker-3-augustus-gene-411.38-mRNA-1 | Japonica | NA       |               |              |                          |                                                                          |
| maker-3-augustus-gene-411.41-mRNA-1 | Japonica | Indica   |               | Os03g0686900 | OsR498G0306821500.01.T01 | Protein FLOURY ENDOSPERM 6, chloroplastic                                |
| maker-3-augustus-gene-411.45-mRNA-1 | Japonica | NA       |               | Os03g0688200 | OsR498G0306828100.01.T01 |                                                                          |
| maker-3-augustus-gene-411.52-mRNA-1 | Japonica | NA       |               | Os03g0687000 | OsR498G0306821800.01.T01 | Solute carrier family 15 (Peptide/histidine transporter), member 3/4     |
| maker-3-augustus-gene-411.57-mRNA-1 | Japonica | Indica   |               | Os03g0687200 | OsR498G0306824200.01.T03 | Formin-like protein 14                                                   |
| maker-3-augustus-gene-411.62-mRNA-1 | Japonica | Japonica |               | Os03g0688000 | OsR498G0306827000.01.T01 | rRNA N-glycosidase                                                       |
| maker-3-augustus-gene-412.0-mRNA-1  | Japonica | NA       |               | Os03g0688300 | OsR498G0306829300.01.T01 | Calmodulin domain protein kinase, putative                               |
| maker-3-augustus-gene-412.14-mRNA-1 | Japonica | NA       | CC-LRR-NBS-TM | Os03g0689800 | OsR498G0306832100.01.T01 | NB-ARC domain containing protein                                         |
| maker-3-augustus-gene-412.16-mRNA-1 | Japonica | Indica   |               | Os03g0690000 | OsR498G0306833100.01.T01 | Costars domain-containing protein (Fragment)                             |
| maker-3-augustus-gene-412.19-mRNA-1 | Japonica | NA       | CC-LRR-NBS-TM | Os03g0689400 |                          | Disease resistance protein RGA2                                          |
| maker-3-augustus-gene-412.2-mRNA-1  | Japonica | NA       |               | Os03g0689100 | OsR498G0306829900.01.T01 | Inositol hexakisphosphate and diphosphoinositol-pentakisphosphate kinase |
| maker-3-augustus-gene-412.21-mRNA-1 | Japonica | Indica   |               | Os03g0689900 | OsR498G0306832800.01.T01 | Tetratricopeptide repeat protein 38                                      |
| maker-3-augustus-gene-413.22-mRNA-1 | Japonica | Japonica |               | Os03g0691500 | OsR498G0306844300.01.T01 | BHLH family protein, putative, expressed                                 |
| maker-3-augustus-gene-413.25-mRNA-1 | Japonica | NA       |               | Os03g0691400 | OsR498G0306843600.01.T01 | 4HBT domain-containing protein                                           |
| maker-3-augustus-gene-414.0-mRNA-1  | Japonica | NA       |               | Os03g0691800 | OsR498G0306845300.01.T01 | GSDH domain-containing protein (Fragment)                                |
| maker-3-augustus-gene-414.11-mRNA-1 | Japonica | Japonica |               | Os03g0692500 | OsR498G0306849000.01.T03 | Hydroxyproline O-galactosyltransferase GALT4                             |
| maker-3-augustus-gene-414.2-mRNA-1  | Japonica | NA       |               | Os03g0692000 | OsR498G0306845900.01.T01 | Beta-glucuronosyltransferase                                             |

|                                     |          |          |               |              |                          |                                                                   |
|-------------------------------------|----------|----------|---------------|--------------|--------------------------|-------------------------------------------------------------------|
| maker-3-augustus-gene-414.5-mRNA-1  | Japonica | NA       |               |              | OsR498G0306846100.01.T02 |                                                                   |
| maker-3-augustus-gene-414.8-mRNA-1  | Japonica | NA       |               | Os03g0692400 | OsR498G0306848200.01.T05 | Protein UPSTREAM OF FLC like                                      |
| maker-3-augustus-gene-415.42-mRNA-1 | Japonica | NA       |               | Os03g0693600 | OsR498G0306852900.01.T01 | Indole-3-acetate beta-glucosyltransferase                         |
| maker-3-augustus-gene-415.44-mRNA-1 | Japonica | NA       |               | Os03g0694500 | OsR498G0306855500.01.T02 | Nucleobase-ascorbate transporter LPE1                             |
| maker-3-augustus-gene-415.53-mRNA-1 | Japonica | NA       |               | Os03g0694900 | OsR498G0306856700.01.T01 | Valyl-tRNA synthetase                                             |
| maker-3-augustus-gene-415.59-mRNA-1 | Japonica | NA       |               |              | OsR498G0713858700.01.T01 | Kinase D-interacting substrate of                                 |
| maker-3-augustus-gene-415.62-mRNA-1 | Japonica | NA       |               | Os03g0695500 | OsR498G0306859100.01.T01 | Myelin-associated oligodendrocyte basic protein isoform 1         |
| maker-3-augustus-gene-416.30-mRNA-1 | Japonica | NA       |               | Os03g0696000 | OsR498G0306860100.01.T02 | WHY domain-containing protein                                     |
| maker-3-augustus-gene-416.32-mRNA-1 | Japonica | NA       |               | Os03g0696300 | OsR498G0306861700.01.T08 | CCAAT-binding transcription factor                                |
| maker-3-augustus-gene-416.37-mRNA-1 | Japonica | NA       |               | Os03g0695600 | OsR498G0306859400.01.T01 | Proteasome endopeptidase complex                                  |
| maker-3-augustus-gene-416.40-mRNA-1 | Japonica | NA       |               |              | OsR498G0306859600.01.T03 | Chloride channel protein CLC-d                                    |
| maker-3-augustus-gene-417.35-mRNA-1 | Japonica | NA       |               |              |                          | C2H2-type domain-containing protein                               |
| maker-3-augustus-gene-417.37-mRNA-1 | Japonica | NA       |               | Os03g0698500 | OsR498G0306867700.01.T06 | Yippee domain-containing protein                                  |
| maker-3-augustus-gene-417.41-mRNA-1 | Japonica | NA       |               | Os03g0699200 | OsR498G0306870300.01.T01 | Pescadillo homolog                                                |
| maker-3-augustus-gene-417.47-mRNA-1 | Japonica | NA       |               | Os03g0699300 | OsR498G0306870500.01.T02 | Adenylosuccinate synthetase, chloroplastic                        |
| maker-3-augustus-gene-417.50-mRNA-1 | Japonica | NA       |               | Os03g0699600 | OsR498G0306870900.01.T01 | LysM domain containing protein, expressed                         |
| maker-3-augustus-gene-417.52-mRNA-1 | Japonica | NA       |               | Os03g0699700 | OsR498G0306871300.01.T01 | Lipoxygenase                                                      |
| maker-3-augustus-gene-417.56-mRNA-1 | Japonica | Indica   |               | Os03g0698350 | OsR498G0306867200.01.T01 | ABC1 domain-containing protein                                    |
| maker-3-augustus-gene-417.62-mRNA-1 | Japonica | NA       |               |              | OsR498G0306870200.01.T01 | denticleless protein homolog A                                    |
| maker-3-augustus-gene-417.65-mRNA-1 | Japonica | NA       |               | Os03g0699400 | OsR498G0306870800.01.T01 | N-alpha-acetyltransferase 20                                      |
| maker-3-augustus-gene-418.39-mRNA-1 | Japonica | NA       |               | Os03g0700400 | OsR498G0306873300.01.T03 | Lipoxygenase                                                      |
| maker-3-augustus-gene-418.42-mRNA-1 | Japonica | NA       |               | Os03g0700700 | OsR498G0306875300.01.T02 | Lipoxygenase                                                      |
| maker-3-augustus-gene-418.47-mRNA-1 | Japonica | NA       |               | Os03g0700800 | OsR498G0306875700.01.T02 | Ethylene insensitive 2                                            |
| maker-3-augustus-gene-418.52-mRNA-1 | Japonica | Indica   |               | Os03g0701000 | OsR498G0306876300.01.T02 | TOG domain-containing protein (Fragment)                          |
| maker-3-augustus-gene-418.57-mRNA-1 | Japonica | NA       |               | Os03g0701200 | OsR498G0306876900.01.T01 | Suppressor of disruption of TFIIS                                 |
| maker-3-augustus-gene-418.62-mRNA-1 | Japonica | Indica   |               | Os03g0701300 | OsR498G0306877500.01.T02 |                                                                   |
| maker-3-augustus-gene-418.65-mRNA-1 | Japonica | NA       |               |              | OsR498G0306877900.01.T03 | Pentatricopeptide repeat-containing protein                       |
| maker-3-augustus-gene-418.66-mRNA-1 | Japonica | NA       |               |              | OsR498G0306876800.01.T03 | Pre-mRNA-splicing factor 18                                       |
| maker-3-augustus-gene-419.0-mRNA-1  | Japonica | NA       |               | Os03g0701800 | OsR498G0306880300.01.T07 | Phosphatidylinositol 4-phosphate 5-kinase                         |
| maker-3-augustus-gene-419.11-mRNA-1 | Japonica | NA       |               | Os03g0701600 | OsR498G0306879000.01.T01 | CHZ domain-containing protein                                     |
| maker-3-augustus-gene-419.15-mRNA-1 | Japonica | NA       |               | Os03g0701700 | OsR498G0306879800.01.T01 | Ethylene responsive factor                                        |
| maker-3-augustus-gene-419.19-mRNA-1 | Japonica | NA       |               |              | OsR498G0306880600.01.T01 | Pinin/SDK/memA/ protein conserved region containing protein       |
| maker-3-augustus-gene-419.25-mRNA-1 | Japonica | NA       |               | Os03g0702000 | OsR498G0306881400.01.T01 | Glycosyltransferase                                               |
| maker-3-augustus-gene-419.27-mRNA-1 | Japonica | NA       |               | Os03g0703000 | OsR498G0306884400.01.T02 | Beta-glucosidase 7                                                |
| maker-3-augustus-gene-419.34-mRNA-1 | Japonica | NA       |               | Os03g0703100 | OsR498G0306884800.01.T02 | Beta-glucosidase 8                                                |
| maker-3-augustus-gene-419.41-mRNA-1 | Japonica | Indica   | Kinase-LRR-TM | Os03g0703200 | OsR498G0306885000.01.T01 | LRR receptor-like serine/threonine-protein kinase                 |
| maker-3-augustus-gene-419.6-mRNA-1  | Japonica | NA       |               |              |                          | Organic anion transporter                                         |
| maker-3-augustus-gene-42.40-mRNA-1  | Japonica | NA       |               | Os03g0184100 | OsR498G0305343300.01.T06 | 15-cis-phytoene desaturase chloroplastic/chromoplastic            |
| maker-3-augustus-gene-42.44-mRNA-1  | Japonica | NA       |               | Os10g0352200 |                          |                                                                   |
| maker-3-augustus-gene-42.46-mRNA-1  | Japonica | Indica   |               | Os03g0184300 | OsR498G0305344900.01.T01 | Hexosyltransferase                                                |
| maker-3-augustus-gene-42.49-mRNA-1  | Japonica | NA       | LRR-TM        | Os03g0184400 | OsR498G0305345100.01.T01 | Leucine-rich repeat receptor-like serine/threonine-protein kinase |
| maker-3-augustus-gene-42.52-mRNA-1  | Japonica | NA       |               |              | OsR498G0305345700.01.T01 | NAD-dependent epimerase/dehydratase                               |
| maker-3-augustus-gene-42.59-mRNA-1  | Japonica | NA       |               |              | OsR498G0305348700.01.T02 | GPI inositol-deacylase                                            |
| maker-3-augustus-gene-42.64-mRNA-1  | Japonica | NA       |               | Os03g0186100 | OsR498G0305349500.01.T01 | Uroporphyrinogen-III synthase                                     |
| maker-3-augustus-gene-42.71-mRNA-1  | Japonica | NA       |               | Os03g0186500 | OsR498G0305350300.01.T01 | Transmembrane protein 1 (Fragment)                                |
| maker-3-augustus-gene-42.73-mRNA-1  | Japonica | NA       |               | Os03g0184500 | OsR498G0305345400.01.T01 | B3 DNA binding domain                                             |
| maker-3-augustus-gene-42.75-mRNA-1  | Japonica | NA       |               | Os03g0184700 | OsR498G0305346200.01.T01 | Origin of replication complex subunit like                        |
| maker-3-augustus-gene-420.0-mRNA-1  | Japonica | NA       |               | Os03g0703900 | OsR498G0306887100.01.T01 | SNARE associated Golgi protein family                             |
| maker-3-augustus-gene-420.11-mRNA-1 | Japonica | NA       |               |              | OsR498G0306889100.01.T05 | Oxysterol-binding protein-related protein 1C                      |
| maker-3-augustus-gene-420.15-mRNA-1 | Japonica | NA       |               | Os03g0703300 | OsR498G0306885200.01.T01 | Opaque endosperm10                                                |
| maker-3-augustus-gene-420.19-mRNA-1 | Japonica | NA       | Kinase-TM     | Os03g0703400 | OsR498G0306885800.01.T03 | Mitogen-activated protein kinase kinase kinase 1                  |
| maker-3-augustus-gene-420.23-mRNA-1 | Japonica | NA       |               |              | OsR498G0306887800.01.T03 | Histone-lysine N-methyltransferase ASHR1                          |
| maker-3-augustus-gene-420.3-mRNA-1  | Japonica | Indica   |               | Os03g0704000 | OsR498G0306887300.01.T02 | Putative plastid-lipid-associated protein 4, chloroplastic        |
| maker-3-augustus-gene-420.5-mRNA-1  | Japonica | NA       |               | Os03g0704100 | OsR498G0306887500.01.T02 | probable plastid-lipid-associated protein 4, chloroplastic        |
| maker-3-augustus-gene-420.9-mRNA-1  | Japonica | Indica   | Kinase-TM     | Os03g0704400 | OsR498G0306887900.01.T01 | Serine/threonine-protein kinase mph1                              |
| maker-3-augustus-gene-421.24-mRNA-1 | Japonica | NA       |               | Os03g0705300 | OsR498G0306890800.01.T01 | Phosphatidylinositol 4-phosphate 5-kinase                         |
| maker-3-augustus-gene-421.29-mRNA-1 | Japonica | NA       |               | Os03g0706900 | OsR498G0306899000.01.T03 | Transmembrane Fragile-X-F-associated protein isoform 1            |
| maker-3-augustus-gene-422.1-mRNA-1  | Japonica | Indica   |               | Os03g0707200 | OsR498G0306899500.01.T03 | Drug/metabolite transporter                                       |
| maker-3-augustus-gene-422.15-mRNA-1 | Japonica | NA       |               | Os03g0707900 | OsR498G0306903200.01.T01 | Outer envelope protein 64, chloroplastic                          |
| maker-3-augustus-gene-422.19-mRNA-1 | Japonica | NA       |               |              | OsR498G0306904000.01.T05 | Phytanoyl-CoA dioxygenase                                         |
| maker-3-augustus-gene-422.6-mRNA-1  | Japonica | Japonica |               | Os03g0708000 | OsR498G1120323400.01.T01 | Secretory phospholipase A2                                        |

|                                     |          |          |               |              |                          |                                                                            |
|-------------------------------------|----------|----------|---------------|--------------|--------------------------|----------------------------------------------------------------------------|
| maker-3-augustus-gene-422.9-mRNA-1  | Japonica | NA       |               | Os03g0707300 | OsR498G0306899800.01.T01 |                                                                            |
| maker-3-augustus-gene-423.0-mRNA-1  | Japonica | NA       |               | Os03g0708400 | OsR498G0306904700.01.T01 | FKBP-type peptidyl-prolyl cis-trans isomerase 5 isoform 2                  |
| maker-3-augustus-gene-423.10-mRNA-1 | Japonica | NA       |               | Os03g0710000 | OsR498G0306910500.01.T02 | Putative vacuolar protein sorting-associated protein 1st1                  |
| maker-3-augustus-gene-423.13-mRNA-1 | Japonica | Japonica |               | Os03g0710500 | OsR498G0306911100.01.T01 | Luminal-binding protein 5                                                  |
| maker-3-augustus-gene-423.16-mRNA-1 | Japonica | NA       |               | Os03g0708500 | OsR498G0306905000.01.T02 | Peptidylprolyl isomerase                                                   |
| maker-3-augustus-gene-423.18-mRNA-1 | Japonica | Japonica |               | Os03g0708700 | OsR498G0306905400.01.T01 | Myosin-binding protein 2 isoform X3                                        |
| maker-3-augustus-gene-423.20-mRNA-1 | Japonica | NA       |               | Os03g0709000 | OsR498G0306907200.01.T01 | MAPEG family protein, expressed                                            |
| maker-3-augustus-gene-423.23-mRNA-1 | Japonica | NA       |               | Os03g0709100 | OsR498G0306907600.01.T01 | Phytoecyanin domain-containing protein (Fragment)                          |
| maker-3-augustus-gene-423.25-mRNA-1 | Japonica | NA       |               | Os03g0709300 | OsR498G0306908200.01.T01 | Chemocyanin                                                                |
| maker-3-augustus-gene-423.27-mRNA-1 | Japonica | NA       |               |              | OsR498G0306910800.01.T01 | Homologous-pairing protein 2 homolog                                       |
| maker-3-augustus-gene-423.29-mRNA-1 | Japonica | NA       | CC-Kinase     |              | OsR498G0306910800.01.T02 | Homologous-pairing protein 2 homolog                                       |
| maker-3-augustus-gene-423.6-mRNA-1  | Japonica | NA       |               | Os03g0708900 | OsR498G0306906900.01.T01 | Zn-finger in Ran binding protein and others, putative                      |
| maker-3-augustus-gene-424.0-mRNA-1  | Japonica | NA       |               | Os03g0710800 | OsR498G0306912100.01.T04 |                                                                            |
| maker-3-augustus-gene-424.14-mRNA-1 | Japonica | NA       |               | Os03g0710700 | OsR498G0306911600.01.T02 | GLTP domain-containing protein                                             |
| maker-3-augustus-gene-424.2-mRNA-1  | Japonica | NA       |               | Os03g0710900 | OsR498G0306912500.01.T01 |                                                                            |
| maker-3-augustus-gene-424.21-mRNA-1 | Japonica | NA       |               |              | OsR498G0306914000.01.T02 | Phosphatidylinositol 4-kinase alpha 1                                      |
| maker-3-augustus-gene-424.23-mRNA-1 | Japonica | NA       | Kinase-TM     | Os03g0711300 | OsR498G0306914200.01.T02 | Serine/threonine-protein kinase grik2                                      |
| maker-3-augustus-gene-424.29-mRNA-1 | Japonica | NA       |               | Os03g0711400 | OsR498G0306914600.01.T01 | Coatomer subunit alpha                                                     |
| maker-3-augustus-gene-424.30-mRNA-1 | Japonica | NA       |               | Os03g0711400 | OsR498G0306915200.01.T01 | Coatomer subunit alpha                                                     |
| maker-3-augustus-gene-424.35-mRNA-1 | Japonica | Indica   |               | Os03g0711650 | OsR498G0306916000.01.T02 | AT hook motif family protein, expressed                                    |
| maker-3-augustus-gene-424.8-mRNA-1  | Japonica | NA       |               | Os03g0711100 | OsR498G0306913700.01.T01 | Zinc finger protein like                                                   |
| maker-3-augustus-gene-425.30-mRNA-1 | Japonica | NA       |               |              | OsR498G0306917100.01.T01 | Calmodulin-binding heat-shock protein, putative                            |
| maker-3-augustus-gene-425.32-mRNA-1 | Japonica | NA       |               | Os03g0712100 | OsR498G0306917300.01.T01 | Cell division cycle-associated protein 7                                   |
| maker-3-augustus-gene-425.35-mRNA-1 | Japonica | NA       |               | Os03g0712200 | OsR498G0306917500.01.T01 | Zinc finger protein VAR3, chloroplastic                                    |
| maker-3-augustus-gene-425.39-mRNA-1 | Japonica | NA       |               | Os03g0712300 | OsR498G0306917700.01.T01 | UBC core domain-containing protein (Fragment)                              |
| maker-3-augustus-gene-425.42-mRNA-1 | Japonica | NA       |               | Os03g0712700 | OsR498G0306919300.01.T01 | Phosphoglucosyltransferase (alpha-D-glucose-1,6-bisphosphate-dependent)    |
| maker-3-augustus-gene-425.48-mRNA-1 | Japonica | NA       |               |              | OsR498G0306921700.01.T01 | Threonine dehydratase 1 biosynthetic, chloroplastic                        |
| maker-3-augustus-gene-425.55-mRNA-1 | Japonica | Indica   |               | Os10g0567800 | OsR498G0306922100.01.T01 | Dynamin-related protein 1C isoform A                                       |
| maker-3-augustus-gene-425.62-mRNA-1 | Japonica | NA       | Kinase-TM     | Os03g0711800 | OsR498G0306916400.01.T04 | probable serine/threonine protein kinase IREH1                             |
| maker-3-augustus-gene-425.67-mRNA-1 | Japonica | NA       | Kinase-LRR-TM |              | OsR498G0306918600.01.T01 | Atypical receptor-like kinase MARK                                         |
| maker-3-augustus-gene-425.69-mRNA-1 | Japonica | NA       |               | Os03g0712600 | OsR498G0306919200.01.T01 | Leucine Rich Repeat, putative                                              |
| maker-3-augustus-gene-425.72-mRNA-1 | Japonica | NA       |               | Os03g0712800 | OsR498G0306920200.01.T02 | Glutamine synthetase nodule isozyme                                        |
| maker-3-augustus-gene-425.77-mRNA-1 | Japonica | Indica   |               | Os03g0713200 | OsR498G0306922400.01.T01 | NADH-ubiquinone oxidoreductase 75 kDa subunit, mitochondrial               |
| maker-3-augustus-gene-426.35-mRNA-1 | Japonica | NA       |               | Os03g0713700 | OsR498G0306924300.01.T04 | WAS protein family 1 (Fragment)                                            |
| maker-3-augustus-gene-426.40-mRNA-1 | Japonica | NA       |               | Os03g0337700 | OsR498G0306926100.01.T01 | GPN-loop GTPase 3                                                          |
| maker-3-augustus-gene-426.48-mRNA-1 | Japonica | NA       |               | Os03g0713400 | OsR498G0306922600.01.T01 | NADH-ubiquinone oxidoreductase 75 kDa subunit, mitochondrial               |
| maker-3-augustus-gene-426.50-mRNA-1 | Japonica | NA       |               | Os03g0713600 | OsR498G0306924000.01.T02 | Binding partner of ACD11 1                                                 |
| maker-3-augustus-gene-427.32-mRNA-1 | Japonica | NA       |               | Os03g0715400 | OsR498G0306930300.01.T05 | Protein POLLEN DEFECTIVE IN GUIDANCE 1 isoform C                           |
| maker-3-augustus-gene-427.38-mRNA-1 | Japonica | NA       |               |              | OsR498G0306930700.01.T01 | Calmodulin                                                                 |
| maker-3-augustus-gene-427.41-mRNA-1 | Japonica | NA       |               |              | OsR498G0306932700.01.T02 |                                                                            |
| maker-3-augustus-gene-427.43-mRNA-1 | Japonica | NA       |               | Os03g0717200 | OsR498G0306935300.01.T01 | Transmembrane ascorbate ferrioreductase 1                                  |
| maker-3-augustus-gene-427.45-mRNA-1 | Japonica | NA       |               | Os09g0434600 | OsR498G0204973200.01.T01 | Glycosyltransferase family protein 2                                       |
| maker-3-augustus-gene-427.47-mRNA-1 | Japonica | NA       |               |              |                          | CNH domain-containing protein                                              |
| maker-3-augustus-gene-427.51-mRNA-1 | Japonica | NA       |               | Os03g0716200 | OsR498G0306931400.01.T01 | PHD finger protein MALE MEIOCYTE DEATH 1                                   |
| maker-3-augustus-gene-427.53-mRNA-1 | Japonica | Indica   | Kinase-LRR-TM | Os03g0717000 | OsR498G0306934600.01.T01 | Receptor-like kinase TMK2                                                  |
| maker-3-augustus-gene-427.55-mRNA-1 | Japonica | NA       |               | Os03g0717600 | OsR498G0306936200.01.T01 | Matrin-type domain-containing protein                                      |
| maker-3-augustus-gene-428.0-mRNA-1  | Japonica | NA       |               |              | OsR498G0306936500.01.T02 | Histidine kinase                                                           |
| maker-3-augustus-gene-428.14-mRNA-1 | Japonica | NA       |               | Os03g0718000 | OsR498G0306937800.01.T02 | Anthranyl synthase/para-aminobenzoate synthase, glutamine amidotransferase |
| maker-3-augustus-gene-428.24-mRNA-1 | Japonica | Indica   |               | Os03g0719000 | OsR498G0306942400.01.T01 | 65-kDa microtubule-associated protein 6                                    |
| maker-3-augustus-gene-428.29-mRNA-1 | Japonica | NA       |               | Os03g0719300 | OsR498G0306943600.01.T02 | 3,4-dihydroxy-2-butanone kinase                                            |
| maker-3-augustus-gene-428.4-mRNA-1  | Japonica | NA       |               | Os03g0717900 | OsR498G0306937500.01.T01 | UV-B-induced protein chloroplastic                                         |
| maker-3-augustus-gene-429.30-mRNA-1 | Japonica | NA       |               | Os03g0720300 | OsR498G0306946900.01.T01 | Glutamate decarboxylase                                                    |
| maker-3-augustus-gene-429.34-mRNA-1 | Japonica | NA       |               | Os03g0720800 | OsR498G0306953100.01.T01 | Transcription factor MYB52                                                 |
| maker-3-augustus-gene-429.36-mRNA-1 | Japonica | NA       |               | Os03g0719400 | OsR498G0306943800.01.T01 | Monoglyceride lipase                                                       |
| maker-3-augustus-gene-429.41-mRNA-1 | Japonica | NA       | CC-Kinase     |              | OsR498G0306944200.01.T01 | Putative serine/threonine-protein kinase dyrk2                             |
| maker-3-augustus-gene-429.44-mRNA-1 | Japonica | NA       |               | Os03g0719800 | OsR498G0306945000.01.T01 | Phytochrome A                                                              |
| maker-3-augustus-gene-429.46-mRNA-1 | Japonica | NA       | Kinase-TM     | Os03g0719850 | OsR498G0306945400.01.T01 | Protein kinase domain containing protein                                   |
| maker-3-augustus-gene-429.48-mRNA-1 | Japonica | NA       |               | Os03g0719900 | OsR498G0306945600.01.T01 | Proton-dependent oligopeptide transporter                                  |
| maker-3-augustus-gene-429.53-mRNA-1 | Japonica | NA       | Kinase        | Os11g0620500 | OsR498G0510972100.01.T01 | Pollen receptor-like kinase 6                                              |
| maker-3-augustus-gene-429.55-mRNA-1 | Japonica | NA       |               |              | OsR498G0407709200.01.T01 |                                                                            |
| maker-3-augustus-gene-43.0-mRNA-1   | Japonica | NA       |               | Os03g0186800 | OsR498G0305351100.01.T01 | VPS37 C-terminal domain-containing protein                                 |



|                                     |          |          |               |              |                          |                                                                           |
|-------------------------------------|----------|----------|---------------|--------------|--------------------------|---------------------------------------------------------------------------|
| maker-3-augustus-gene-43.10-mRNA-1  | Japonica | Indica   |               | Os03g0187300 | OsR498G0305353100.01.T01 | WD and tetra tricopeptide repeats protein 1                               |
| maker-3-augustus-gene-43.15-mRNA-1  | Japonica | NA       |               | Os03g0187400 | OsR498G0305354100.01.T01 | Myb-like protein H isoform X1                                             |
| maker-3-augustus-gene-43.17-mRNA-1  | Japonica | NA       |               | Os03g0187600 | OsR498G0305356500.01.T01 | GRAM domain-containing protein (Fragment)                                 |
| maker-3-augustus-gene-43.21-mRNA-1  | Japonica | Indica   |               | Os08g0480000 | OsR498G0305358500.01.T01 | Protein DETOXIFICATION                                                    |
| maker-3-augustus-gene-43.24-mRNA-1  | Japonica | NA       |               | Os03g0186600 | OsR498G0305350600.01.T02 | JOINTLESS like protein MdJOINTLESSb                                       |
| maker-3-augustus-gene-43.3-mRNA-1   | Japonica | NA       |               | Os03g0187000 | OsR498G0305352100.01.T01 | Protein DCL, chloroplastic                                                |
| maker-3-augustus-gene-43.31-mRNA-1  | Japonica | NA       |               | Os03g0186950 | OsR498G0305352000.01.T02 | Protein CutA chloroplastic                                                |
| maker-3-augustus-gene-43.33-mRNA-1  | Japonica | NA       |               |              | OsR498G0305355400.01.T01 | F-box protein FBX14                                                       |
| maker-3-augustus-gene-430.34-mRNA-1 | Japonica | NA       |               |              |                          | ILITYHIA                                                                  |
| maker-3-augustus-gene-430.39-mRNA-1 | Japonica | NA       |               | Os03g0721900 | OsR498G0306955700.01.T01 |                                                                           |
| maker-3-augustus-gene-430.41-mRNA-1 | Japonica | NA       |               |              | OsR498G0306956300.01.T01 | SWI/SNF complex subunit SWI3D                                             |
| maker-3-augustus-gene-430.47-mRNA-1 | Japonica | NA       |               |              | OsR498G0306956900.01.T03 | Chromatin complex subunit A 106                                           |
| maker-3-augustus-gene-430.51-mRNA-1 | Japonica | NA       |               | Os03g0721300 | OsR498G0306954600.01.T01 | Pre-mRNA processing protein PRP39, putative                               |
| maker-3-augustus-gene-430.53-mRNA-1 | Japonica | NA       |               |              |                          |                                                                           |
| maker-3-augustus-gene-430.55-mRNA-1 | Japonica | Indica   |               | Os03g0722600 | OsR498G0306957400.01.T01 | Adenylyl cyclase-associated protein (Fragment)                            |
| maker-3-augustus-gene-430.60-mRNA-1 | Japonica | NA       |               | Os03g0722800 | OsR498G0306958200.01.T03 | FBD domain-containing protein                                             |
| maker-3-augustus-gene-431.32-mRNA-1 | Japonica | NA       |               | Os03g0723400 | OsR498G0306960100.01.T01 | Late embryogenesis abundant protein (Fragment)                            |
| maker-3-augustus-gene-431.35-mRNA-1 | Japonica | NA       |               | Os03g0723600 | OsR498G0306960300.01.T01 | BTB/POZ domain-containing protein Isoform A                               |
| maker-3-augustus-gene-431.37-mRNA-1 | Japonica | NA       |               | Os03g0724100 | OsR498G0306963100.01.T02 | CRAL-TRIO domain-containing protein                                       |
| maker-3-augustus-gene-431.40-mRNA-1 | Japonica | NA       | Kinase-LRR-TM |              | OsR498G0306963400.01.T02 | Lrr receptor protein kinase                                               |
| maker-3-augustus-gene-432.45-mRNA-1 | Japonica | Japonica |               | Os03g0724900 | OsR498G0306965800.01.T01 |                                                                           |
| maker-3-augustus-gene-432.47-mRNA-1 | Japonica | Indica   |               | Os03g0725100 | OsR498G0306966300.01.T01 | Fip1 domain-containing protein                                            |
| maker-3-augustus-gene-432.54-mRNA-1 | Japonica | NA       |               |              | OsR498G0306966900.01.T03 | DBR1 domain-containing protein (Fragment)                                 |
| maker-3-augustus-gene-432.60-mRNA-1 | Japonica | NA       |               | Os03g0725400 | OsR498G0306967100.01.T04 | COMPASS-like protein H3K4 histone methylase component WDR5A               |
| maker-3-augustus-gene-432.62-mRNA-1 | Japonica | NA       |               | Os03g0725800 | OsR498G0306969900.01.T01 | Symbiotic ammonium transporter                                            |
| maker-3-augustus-gene-432.65-mRNA-1 | Japonica | Indica   |               | Os03g0726100 | OsR498G0306970700.01.T02 | Tubulin alpha chain                                                       |
| maker-3-augustus-gene-432.69-mRNA-1 | Japonica | NA       |               | Os03g0726200 | OsR498G0306971100.01.T01 | Inositol-tetakisphosphate 1-kinase                                        |
| maker-3-augustus-gene-432.74-mRNA-1 | Japonica | NA       |               | Os03g0724500 | OsR498G0306965200.01.T01 | SANT domain-containing protein (Fragment)                                 |
| maker-3-augustus-gene-432.76-mRNA-1 | Japonica | NA       |               | Os03g0724600 | OsR498G0306965400.01.T01 |                                                                           |
| maker-3-augustus-gene-432.78-mRNA-1 | Japonica | NA       |               | Os03g0724800 | OsR498G0306965800.01.T01 |                                                                           |
| maker-3-augustus-gene-433.26-mRNA-1 | Japonica | NA       |               | Os03g0727100 | OsR498G0306976100.01.T01 | E3 ubiquitin-protein ligase BRE1-like                                     |
| maker-3-augustus-gene-433.29-mRNA-1 | Japonica | NA       |               | Os03g0726300 | OsR498G0306972000.01.T01 | Expressed protein (With alternative splicing)                             |
| maker-3-augustus-gene-433.31-mRNA-1 | Japonica | NA       |               | Os03g0726500 | OsR498G0306973000.01.T01 | Transmembrane protein TauE like                                           |
| maker-3-augustus-gene-433.36-mRNA-1 | Japonica | NA       |               |              | OsR498G0306974600.01.T01 | EPIDERMAL PATTERNING FACTOR-like protein 2                                |
| maker-3-augustus-gene-433.38-mRNA-1 | Japonica | NA       |               | Os03g0726800 | OsR498G0306974800.01.T02 | DUF676 domain-containing protein (Fragment)                               |
| maker-3-augustus-gene-433.42-mRNA-1 | Japonica | Japonica |               | Os03g0726900 | OsR498G0306975200.01.T03 | WD-3 domain-containing protein                                            |
| maker-3-augustus-gene-433.49-mRNA-1 | Japonica | Indica   |               | Os03g0727000 | OsR498G0306975400.01.T02 | Homeotic protein like                                                     |
| maker-3-augustus-gene-434.0-mRNA-1  | Japonica | NA       |               | Os03g0728100 |                          | J domain-containing protein                                               |
| maker-3-augustus-gene-434.17-mRNA-1 | Japonica | Indica   |               | Os03g0728600 | OsR498G0306979600.01.T02 | Putative DNA-binding protein-like                                         |
| maker-3-augustus-gene-434.3-mRNA-1  | Japonica | NA       |               | Os03g0727600 | OsR498G0306977200.01.T01 | Pollen-specific 1-aminocyclopropane-1-carboxylate synthase                |
| maker-3-augustus-gene-434.5-mRNA-1  | Japonica | NA       |               | Os03g0727900 | OsR498G0306979000.01.T01 | Hflx-type G domain-containing protein (Fragment)                          |
| maker-3-augustus-gene-434.6-mRNA-1  | Japonica | NA       |               | Os03g0727900 | OsR498G0306979000.01.T02 | Hflx-type G domain-containing protein (Fragment)                          |
| maker-3-augustus-gene-435.0-mRNA-1  | Japonica | NA       |               | Os03g0728800 | OsR498G0306980100.01.T02 | DEAD-box ATP-dependent RNA helicase                                       |
| maker-3-augustus-gene-435.13-mRNA-1 | Japonica | Japonica |               | Os03g0729800 | OsR498G0306986100.01.T02 | ACT domain containing protein, expressed                                  |
| maker-3-augustus-gene-435.16-mRNA-1 | Japonica | NA       |               | Os03g0728900 | OsR498G0306980400.01.T03 | Transcription factor bHLH74                                               |
| maker-3-augustus-gene-435.20-mRNA-1 | Japonica | NA       |               | Os03g0729000 | OsR498G0306981600.01.T01 | Ethylene-dependent gravitropism-deficient and yellow-green-like 3         |
| maker-3-augustus-gene-435.25-mRNA-1 | Japonica | NA       |               |              | OsR498G0306982000.01.T03 | Transmembrane protein                                                     |
| maker-3-augustus-gene-435.26-mRNA-1 | Japonica | NA       |               | Os03g0729200 | OsR498G0306982400.01.T04 | Thioredoxin-like protein AAED1, chloroplastic                             |
| maker-3-augustus-gene-435.30-mRNA-1 | Japonica | NA       |               | Os03g0729300 | OsR498G0306982600.01.T01 | Thioredoxin-like protein AAED1 chloroplastic                              |
| maker-3-augustus-gene-435.34-mRNA-1 | Japonica | NA       |               |              | OsR498G0306986400.01.T01 | BSD domain containing protein, expressed                                  |
| maker-3-augustus-gene-435.37-mRNA-1 | Japonica | NA       |               | Os03g0730000 | OsR498G0306986800.01.T01 | Lecithin-cholesterol acyltransferase-like protein 1                       |
| maker-3-augustus-gene-435.6-mRNA-1  | Japonica | Indica   |               | Os03g0729500 | OsR498G0306985100.01.T01 | Growth-regulating factor                                                  |
| maker-3-augustus-gene-435.9-mRNA-1  | Japonica | NA       |               | Os03g0729700 | OsR498G0306985700.01.T01 | 16S rRNA (uracil(1498)-N(3))-methyltransferase                            |
| maker-3-augustus-gene-436.0-mRNA-1  | Japonica | NA       |               |              | OsR498G0306987700.01.T04 | Serine carboxypeptidase family protein, expressed                         |
| maker-3-augustus-gene-436.11-mRNA-1 | Japonica | Indica   |               | Os03g0730500 | OsR498G0306989100.01.T01 | Serine carboxypeptidase family protein, expressed                         |
| maker-3-augustus-gene-436.13-mRNA-1 | Japonica | Indica   |               | Os03g0731050 | OsR498G0306989900.01.T01 | Core-2/l-branching beta-16-N-acetylglucosaminyltransferase family protein |
| maker-3-augustus-gene-436.15-mRNA-1 | Japonica | NA       |               | Os03g0731100 | OsR498G0306990100.01.T02 | Photosystem I reaction center subunit N                                   |
| maker-3-augustus-gene-436.17-mRNA-1 | Japonica | NA       |               | Os03g0731500 | OsR498G0306990900.01.T01 | Metalloendopeptidase/zinc ion-binding protein                             |
| maker-3-augustus-gene-436.23-mRNA-1 | Japonica | NA       |               |              | OsR498G0713488800.01.T01 | Pathogenesis-related protein 5                                            |
| maker-3-augustus-gene-436.26-mRNA-1 | Japonica | Indica   |               | Os03g0730800 | OsR498G0306989600.01.T02 | Calcium-transporting ATPase                                               |
| maker-3-augustus-gene-436.4-mRNA-1  | Japonica | NA       |               | Os03g0730500 | OsR498G0306988300.01.T02 | Serine carboxypeptidase-like 18                                           |

|                                     |          |          |               |              |                          |                                                                            |
|-------------------------------------|----------|----------|---------------|--------------|--------------------------|----------------------------------------------------------------------------|
| maker-3-augustus-gene-437.0-mRNA-1  | Japonica | Indica   |               | Os03g0731800 | OsR498G0306991100.01.T01 | Nucleotide-diphospho-sugar transferase                                     |
| maker-3-augustus-gene-437.10-mRNA-1 | Japonica | Japonica |               | Os03g0732000 | OsR498G0306991800.01.T01 | Hydroxymethylbutenyl diphosphate reductase                                 |
| maker-3-augustus-gene-437.23-mRNA-1 | Japonica | NA       |               |              | OsR498G0306992200.01.T04 | Dynamin GTPase                                                             |
| maker-3-augustus-gene-437.25-mRNA-1 | Japonica | Japonica |               | Os03g0733000 | OsR498G0101678500.01.T03 |                                                                            |
| maker-3-augustus-gene-437.5-mRNA-1  | Japonica | NA       |               | Os03g0731900 | OsR498G0306991400.01.T01 | Putative chloroplast 4-hydroxy-3-methylbut-2-en-1-yl diphosphate reductase |
| maker-3-augustus-gene-438.0-mRNA-1  | Japonica | NA       |               | Os03g0734000 |                          |                                                                            |
| maker-3-augustus-gene-438.11-mRNA-1 | Japonica | NA       |               | Os03g0733600 | OsR498G0306998000.01.T01 | GRF-interacting factor 1                                                   |
| maker-3-augustus-gene-438.13-mRNA-1 | Japonica | NA       |               |              | OsR498G0306999400.01.T02 | Endoplasmic reticulum oxidoreductin                                        |
| maker-3-augustus-gene-438.19-mRNA-1 | Japonica | NA       |               |              |                          | Mitochondrial folate transporter/carrier                                   |
| maker-3-augustus-gene-438.23-mRNA-1 | Japonica | NA       |               | Os03g0734900 | OsR498G0307002400.01.T02 | GATA transcription factor                                                  |
| maker-3-augustus-gene-438.33-mRNA-1 | Japonica | NA       |               | Os03g0735300 | OsR498G0307003400.01.T01 | Alba DNA/RNA-binding protein isoform 3 (Fragment)                          |
| maker-3-augustus-gene-438.4-mRNA-1  | Japonica | Japonica |               | Os03g0734200 | OsR498G0307000500.01.T02 |                                                                            |
| maker-3-augustus-gene-438.6-mRNA-1  | Japonica | NA       |               |              | OsR498G0307002900.01.T01 | Cirhin                                                                     |
| maker-3-augustus-gene-439.40-mRNA-1 | Japonica | Indica   |               | Os04g0413200 | OsR498G0307004900.01.T01 | Beta-fructofuranosidase, insoluble isoenzyme 1 like                        |
| maker-3-augustus-gene-439.42-mRNA-1 | Japonica | NA       |               | Os03g0737600 | OsR498G0307009500.01.T05 | Cyclin-H                                                                   |
| maker-3-augustus-gene-439.46-mRNA-1 | Japonica | NA       |               | Os03g0735900 | OsR498G0307005200.01.T01 | Glycerol-3-phosphate 2-O-acyltransferase                                   |
| maker-3-augustus-gene-439.48-mRNA-1 | Japonica | NA       |               | Os03g0736000 | OsR498G0307005800.01.T04 | CCR4-NOT transcription complex subunit 2                                   |
| maker-3-augustus-gene-439.49-mRNA-1 | Japonica | Indica   |               | Os02g0782200 | OsR498G0307005800.01.T06 | NOT2/NOT3/NOT5 family protein, expressed                                   |
| maker-3-augustus-gene-439.62-mRNA-1 | Japonica | NA       |               | Os03g0736300 | OsR498G0307006400.01.T02 | Endoglucanase                                                              |
| maker-3-augustus-gene-439.67-mRNA-1 | Japonica | NA       |               | Os03g0736400 | OsR498G0307007000.01.T03 | Putative rRNA methyltransferase YlbH                                       |
| maker-3-augustus-gene-439.71-mRNA-1 | Japonica | NA       |               | Os03g0737000 | OsR498G0307008400.01.T01 | Cystathionine beta-synthase family protein                                 |
| maker-3-augustus-gene-439.75-mRNA-1 | Japonica | NA       |               |              |                          | ELYS domain-containing protein (Fragment)                                  |
| maker-3-augustus-gene-439.85-mRNA-1 | Japonica | NA       |               | Os03g0737300 | OsR498G0307008800.01.T01 | Magnesium-dependent phosphatase-1                                          |
| maker-3-augustus-gene-439.87-mRNA-1 | Japonica | NA       |               | Os03g0737400 | OsR498G0307009400.01.T01 | Magnesium-dependent phosphatase                                            |
| maker-3-augustus-gene-44.36-mRNA-1  | Japonica | NA       |               | Os03g0188400 | OsR498G0305360300.01.T01 | Transcription factor MYC2                                                  |
| maker-3-augustus-gene-44.38-mRNA-1  | Japonica | NA       |               |              |                          | Homeodomain-leucine zipper transcription factor TaHDZlp1                   |
| maker-3-augustus-gene-44.40-mRNA-1  | Japonica | NA       |               | Os03g0189400 | OsR498G0305364400.01.T01 | GroES-like zinc-binding dehydrogenase family protein isoform 3             |
| maker-3-augustus-gene-44.44-mRNA-1  | Japonica | NA       |               | Os03g0189600 | OsR498G0305364800.01.T03 | Alcohol dehydrogenase 1                                                    |
| maker-3-augustus-gene-44.48-mRNA-1  | Japonica | NA       |               | Os03g0190100 | OsR498G0305366400.01.T02 | 1,4-dihydroxy-2-naphthoate polyprenyltransferase, chloroplastic            |
| maker-3-augustus-gene-44.53-mRNA-1  | Japonica | Indica   | LRR-TM        | Os03g0190300 | OsR498G0305366800.01.T02 | Dynein assembly factor 1, axonemal                                         |
| maker-3-augustus-gene-440.0-mRNA-1  | Japonica | NA       |               | Os03g0737800 | OsR498G0307010100.01.T02 | Vps51/Vps67 family (Components of vesicular transport) protein             |
| maker-3-augustus-gene-440.13-mRNA-1 | Japonica | NA       |               |              | OsR498G0307011300.01.T06 | Non-specific serine/threonine protein kinase                               |
| maker-3-augustus-gene-440.24-mRNA-1 | Japonica | NA       |               | Os03g0738400 | OsR498G0307011500.01.T02 | Glycine hydroxymethyltransferase                                           |
| maker-3-augustus-gene-440.27-mRNA-1 | Japonica | NA       |               | Os03g0738600 | OsR498G0307013100.01.T01 | Lipoxygenase                                                               |
| maker-3-augustus-gene-440.29-mRNA-1 | Japonica | NA       |               | Os03g0738900 | OsR498G0307014300.01.T01 | Phototropic-responsive NPH3 family protein isoform 2                       |
| maker-3-augustus-gene-440.31-mRNA-1 | Japonica | NA       |               |              | OsR498G0307010400.01.T01 | BAT2 domain-containing protein 1                                           |
| maker-3-augustus-gene-440.7-mRNA-1  | Japonica | NA       |               | Os03g0738000 | OsR498G0307011100.01.T01 | Telomerase Cajal body protein 1                                            |
| maker-3-augustus-gene-441.0-mRNA-1  | Japonica | NA       |               | Os03g0739700 | OsR498G0307016500.01.T01 | Pre-mRNA-splicing factor ATP-dependent RNA helicase                        |
| maker-3-augustus-gene-441.12-mRNA-1 | Japonica | NA       |               | Os03g0741100 | OsR498G0307020100.01.T01 | BHLH transcription factor (Fragment)                                       |
| maker-3-augustus-gene-441.14-mRNA-1 | Japonica | NA       |               |              | OsR498G0307022300.01.T03 |                                                                            |
| maker-3-augustus-gene-441.15-mRNA-1 | Japonica | NA       |               | Os03g0741400 | OsR498G0307022300.01.T01 | WRKY transcription factor 21                                               |
| maker-3-augustus-gene-441.3-mRNA-1  | Japonica | NA       |               | Os03g0740600 | OsR498G0307018900.01.T04 | Dehydration responsive element binding protein 1                           |
| maker-3-augustus-gene-441.6-mRNA-1  | Japonica | NA       |               | Os03g0740700 | OsR498G0307019100.01.T01 | Cwfl C-terminus 1 containing protein, expressed                            |
| maker-3-augustus-gene-441.9-mRNA-1  | Japonica | NA       |               | Os03g0740800 | OsR498G0307019700.01.T01 | X-ray repair cross-complementing 4                                         |
| maker-3-augustus-gene-442.0-mRNA-1  | Japonica | NA       |               | Os03g0742300 | OsR498G0307024500.01.T01 | Two-component response regulator ORR41                                     |
| maker-3-augustus-gene-442.15-mRNA-1 | Japonica | NA       |               |              | OsR498G0307023400.01.T01 | Zinc finger, C3HC4 type family protein, expressed                          |
| maker-3-augustus-gene-442.19-mRNA-1 | Japonica | Indica   |               | Os03g0742400 | OsR498G0307024800.01.T03 | Magnesium transporter                                                      |
| maker-3-augustus-gene-442.2-mRNA-1  | Japonica | NA       |               | Os03g0742800 | OsR498G0307026300.01.T02 | Protein transport protein SEC23                                            |
| maker-3-augustus-gene-442.27-mRNA-1 | Japonica | NA       |               | Os03g0742900 | OsR498G0307026600.01.T01 | Auxin-responsive protein IAA13                                             |
| maker-3-augustus-gene-442.29-mRNA-1 | Japonica | NA       |               | Os03g0743900 | OsR498G0307030400.01.T01 | Sulfate adenyllyltransferase                                               |
| maker-3-augustus-gene-442.4-mRNA-1  | Japonica | NA       |               |              | OsR498G0306510800.01.T03 |                                                                            |
| maker-3-augustus-gene-442.6-mRNA-1  | Japonica | NA       |               | Os03g0743400 | OsR498G0307029300.01.T04 | Probable histone H2A variant 3                                             |
| maker-3-augustus-gene-442.8-mRNA-1  | Japonica | NA       |               | Os03g0743500 | OsR498G0307029700.01.T02 | Calmodulin                                                                 |
| maker-3-augustus-gene-443.0-mRNA-1  | Japonica | NA       |               | Os03g0744700 | OsR498G0307033700.01.T05 |                                                                            |
| maker-3-augustus-gene-443.11-mRNA-1 | Japonica | NA       |               | Os03g0744600 | OsR498G0307032000.01.T01 | Stem-specific protein TSJ1                                                 |
| maker-3-augustus-gene-443.15-mRNA-1 | Japonica | Japonica |               | Os03g0744650 | OsR498G0307032200.01.T02 | BEACH domain-containing protein lvsA                                       |
| maker-3-augustus-gene-443.20-mRNA-1 | Japonica | NA       |               | Os03g0744800 | OsR498G0307034000.01.T01 | Transmembrane emp24 domain-containing protein A                            |
| maker-3-augustus-gene-443.23-mRNA-1 | Japonica | NA       |               | Os03g0745000 | OsR498G0307034400.01.T01 | Heat shock transcription factor                                            |
| maker-3-augustus-gene-443.25-mRNA-1 | Japonica | NA       |               | Os03g0745200 | OsR498G0307035000.01.T01 | Transferase family protein, expressed                                      |
| maker-3-augustus-gene-443.8-mRNA-1  | Japonica | NA       | Kinase-LRR-TM |              | OsR498G0307031400.01.T02 | Serine/threonine protein kinase                                            |
| maker-3-augustus-gene-444.43-mRNA-1 | Japonica | NA       |               | Os03g0746600 | OsR498G0307041100.01.T01 | Autophagy-related protein 16 isoform A                                     |

|                                      |          |          |              |              |                          |                                                                             |
|--------------------------------------|----------|----------|--------------|--------------|--------------------------|-----------------------------------------------------------------------------|
| maker-3-augustus-gene-444.46-mRNA-1  | Japonica | NA       |              |              | OsR498G0307042900.01.T01 | sigma non-opioid intracellular receptor 1                                   |
| maker-3-augustus-gene-444.48-mRNA-1  | Japonica | NA       |              | Os03g0747300 | OsR498G0307043300.01.T01 | Altered inheritance of mitochondria protein 24, mitochondrial               |
| maker-3-augustus-gene-444.52-mRNA-1  | Japonica | NA       |              | Os03g0744500 | OsR498G0307041000.01.T04 | DEXH-box ATP-dependent RNA helicase DEXH16 mitochondrial                    |
| maker-3-augustus-gene-444.59-mRNA-1  | Japonica | NA       |              | Os03g0746800 | OsR498G0307041800.01.T01 | tRNA (guanine-N(7)-)-methyltransferase non-catalytic subunit                |
| maker-3-augustus-gene-444.64-mRNA-1  | Japonica | NA       |              |              | OsR498G0307043200.01.T04 |                                                                             |
| maker-3-augustus-gene-445.100-mRNA-1 | Japonica | NA       |              |              |                          | RNA helicase                                                                |
| maker-3-augustus-gene-445.42-mRNA-1  | Japonica | NA       |              |              | OsR498G0307044300.01.T02 | Acyl-CoA N-acyltransferase with RING/FYVE/PHD-type zinc finger protein      |
| maker-3-augustus-gene-445.47-mRNA-1  | Japonica | NA       |              | Os03g0747800 | OsR498G0307045300.01.T03 | Cytosolic cysteine synthase                                                 |
| maker-3-augustus-gene-445.53-mRNA-1  | Japonica | NA       |              | Os03g0747900 | OsR498G0307045500.01.T01 | Myosin-J heavy chain                                                        |
| maker-3-augustus-gene-445.65-mRNA-1  | Japonica | NA       |              | Os03g0748200 | OsR498G0307046300.01.T04 | PHD finger protein ING                                                      |
| maker-3-augustus-gene-445.69-mRNA-1  | Japonica | NA       | Kinase       | Os03g0748400 | OsR498G0307046900.01.T02 | Serine/threonine-protein kinase AFC3                                        |
| maker-3-augustus-gene-445.73-mRNA-1  | Japonica | NA       |              | Os03g0748600 | OsR498G0307047300.01.T01 | MFAP1 domain-containing protein                                             |
| maker-3-augustus-gene-445.76-mRNA-1  | Japonica | NA       |              | Os03g0748900 | OsR498G0307048300.01.T02 | Binding partner of ACD11 1 isoform A                                        |
| maker-3-augustus-gene-445.79-mRNA-1  | Japonica | NA       |              |              | OsR498G0307048700.01.T01 | Ammonium transporter                                                        |
| maker-3-augustus-gene-445.81-mRNA-1  | Japonica | NA       |              | Os03g0749100 | OsR498G0307049100.01.T01 | Glycosyl hydrolase family 3 N terminal domain containing protein, expressed |
| maker-3-augustus-gene-445.83-mRNA-1  | Japonica | Japonica |              | Os03g0747400 | OsR498G0307043600.01.T01 | Late embryogenesis abundant protein D-34                                    |
| maker-3-augustus-gene-445.86-mRNA-1  | Japonica | NA       |              | Os03g0747500 | OsR498G0307044000.01.T01 | late embryogenesis abundant protein 3                                       |
| maker-3-augustus-gene-445.88-mRNA-1  | Japonica | NA       |              | Os03g0747700 | OsR498G0307044800.01.T01 | photosystem II D1 precursor processing protein PSB27-H2, chloroplastic      |
| maker-3-augustus-gene-445.90-mRNA-1  | Japonica | NA       |              | Os03g0748300 | OsR498G0307046600.01.T01 | NDH-dependent cyclic electron flow 5                                        |
| maker-3-augustus-gene-445.92-mRNA-1  | Japonica | NA       |              | Os03g0748500 | OsR498G0307047200.01.T01 | NAD(P)H dehydrogenase (quinone)                                             |
| maker-3-augustus-gene-445.94-mRNA-1  | Japonica | NA       |              | Os03g0748700 | OsR498G0307047600.01.T01 | Cytosolic Fe-S cluster assembly factor narfl                                |
| maker-3-augustus-gene-446.0-mRNA-1   | Japonica | NA       |              | Os03g0749300 | OsR498G0307050300.01.T09 | Lysosomal beta glucosidase                                                  |
| maker-3-augustus-gene-446.13-mRNA-1  | Japonica | NA       |              | Os03g0749900 | OsR498G0307052300.01.T01 | Protein-lysine N-methyltransferase                                          |
| maker-3-augustus-gene-446.15-mRNA-1  | Japonica | NA       |              | Os03g0750200 | OsR498G0307053100.01.T01 | Kinesin-like protein KIN-12E                                                |
| maker-3-augustus-gene-446.22-mRNA-1  | Japonica | NA       | CC-Kinase-TM | Os03g0749800 | OsR498G0307052200.01.T02 | Serine/threonine-protein kinase TOUNLED                                     |
| maker-3-augustus-gene-446.27-mRNA-1  | Japonica | Indica   |              | Os03g0750100 | OsR498G0307052800.01.T02 | TPR Domain containing protein, expressed                                    |
| maker-3-augustus-gene-446.31-mRNA-1  | Japonica | NA       |              | Os03g0750700 |                          | Strictosidine synthase                                                      |
| maker-3-augustus-gene-446.6-mRNA-1   | Japonica | NA       |              | Os03g0749500 | OsR498G0307051700.01.T07 | Beta-glucosidase BoGH3B                                                     |
| maker-3-augustus-gene-447.42-mRNA-1  | Japonica | Indica   |              | Os03g0751000 | OsR498G0307054700.01.T03 | Transmembrane protein 256                                                   |
| maker-3-augustus-gene-447.45-mRNA-1  | Japonica | NA       |              |              |                          | COR domain-containing protein                                               |
| maker-3-augustus-gene-447.48-mRNA-1  | Japonica | NA       |              | Os03g0751400 | OsR498G0307056700.01.T01 | 50S ribosomal protein L6 chloroplastic                                      |
| maker-3-augustus-gene-447.52-mRNA-1  | Japonica | NA       |              | Os03g0751600 | OsR498G0307057300.01.T03 | Protein PYRICULARIA ORYZAE RESISTANCE 21                                    |
| maker-3-augustus-gene-447.54-mRNA-1  | Japonica | NA       |              | Os03g0752100 | OsR498G0307058300.01.T01 | Phytochrome C                                                               |
| maker-3-augustus-gene-447.56-mRNA-1  | Japonica | NA       |              | Os03g0752200 | OsR498G0307058500.01.T03 | Initiator of meiotic double stranded breaks SPO11-1                         |
| maker-3-augustus-gene-447.60-mRNA-1  | Japonica | Indica   |              | Os04g0208200 | OsR498G0307059100.01.T01 | Cysteine proteinase                                                         |
| maker-3-augustus-gene-447.62-mRNA-1  | Japonica | NA       |              | Os03g0752700 | OsR498G0307059500.01.T03 | J domain-containing protein                                                 |
| maker-3-augustus-gene-447.65-mRNA-1  | Japonica | NA       |              | Os03g0750800 | OsR498G0307054200.01.T01 | Transcriptional adapter                                                     |
| maker-3-augustus-gene-447.66-mRNA-1  | Japonica | NA       |              | Os03g0750800 | OsR498G0307054200.01.T04 | Transcriptional adapter                                                     |
| maker-3-augustus-gene-447.77-mRNA-1  | Japonica | NA       |              |              | OsR498G0307054400.01.T01 | Transcriptional adapter ADA2b                                               |
| maker-3-augustus-gene-447.78-mRNA-1  | Japonica | NA       |              | Os03g0750900 | OsR498G0307054400.01.T01 | Transcriptional adapter ADA2b                                               |
| maker-3-augustus-gene-447.83-mRNA-1  | Japonica | NA       |              | Os03g0751100 | OsR498G0307055400.01.T01 | Oligopeptide transporter                                                    |
| maker-3-augustus-gene-447.85-mRNA-1  | Japonica | NA       |              | Os03g0752300 | OsR498G0307058800.01.T02 | Outward-rectifying potassium channel                                        |
| maker-3-augustus-gene-447.90-mRNA-1  | Japonica | NA       |              | Os03g0752800 | OsR498G0307059800.01.T04 | MADS-box protein BM5A                                                       |
| maker-3-augustus-gene-448.26-mRNA-1  | Japonica | NA       |              | Os03g0753500 | OsR498G0307062200.01.T01 |                                                                             |
| maker-3-augustus-gene-448.28-mRNA-1  | Japonica | NA       |              | Os03g0753100 | OsR498G0307061000.01.T01 | MADS-box transcription factor                                               |
| maker-3-augustus-gene-448.31-mRNA-1  | Japonica | Indica   |              | Os03g0753500 | OsR498G0307061200.01.T01 |                                                                             |
| maker-3-augustus-gene-449.0-mRNA-1   | Japonica | NA       |              |              | OsR498G0307063500.01.T02 | Cytochrome b5 heme-binding domain-containing protein (Fragment)             |
| maker-3-augustus-gene-449.11-mRNA-1  | Japonica | NA       | Kinase-TM    | Os03g0755000 | OsR498G0307065100.01.T02 | Serine/threonine-protein kinase dst1                                        |
| maker-3-augustus-gene-449.17-mRNA-1  | Japonica | Indica   |              | Os05g0386800 | OsR498G0307064000.01.T01 | COBRA-like protein 3                                                        |
| maker-3-augustus-gene-449.2-mRNA-1   | Japonica | NA       |              | Os03g0754800 | OsR498G0307064700.01.T01 | Solute carrier family 25 member like                                        |
| maker-3-augustus-gene-449.7-mRNA-1   | Japonica | NA       |              | Os03g0754900 | OsR498G0307064900.01.T01 | Cleavage stimulation factor subunit like                                    |
| maker-3-augustus-gene-45.30-mRNA-1   | Japonica | Japonica |              | Os03g0191400 | OsR498G0305369900.01.T02 | RAB GTPase homolog H1E                                                      |
| maker-3-augustus-gene-45.35-mRNA-1   | Japonica | Japonica |              | Os03g0192100 | OsR498G0305371900.01.T01 | Carboxypeptidase                                                            |
| maker-3-augustus-gene-45.38-mRNA-1   | Japonica | NA       |              | Os03g0190800 | OsR498G0305367400.01.T01 | USP domain-containing protein                                               |
| maker-3-augustus-gene-45.42-mRNA-1   | Japonica | NA       |              |              |                          | Transmembrane protein like                                                  |
| maker-3-augustus-gene-45.47-mRNA-1   | Japonica | NA       |              | Os03g0191000 | OsR498G0305367800.01.T02 | Calmodulin-binding transcription activator 2                                |
| maker-3-augustus-gene-45.51-mRNA-1   | Japonica | NA       |              | Os03g0191100 | OsR498G0305368200.01.T01 | Mitochondrial adenine nucleotide transporter like                           |
| maker-3-augustus-gene-45.53-mRNA-1   | Japonica | NA       |              | Os03g0191200 | OsR498G0305369000.01.T01 | WW domain containing protein expressed                                      |
| maker-3-augustus-gene-45.55-mRNA-1   | Japonica | NA       |              | Os03g0192000 | OsR498G0305371800.01.T01 | Polymerase/histidinol phosphatase-like                                      |
| maker-3-augustus-gene-45.59-mRNA-1   | Japonica | NA       |              | Os03g0192300 | OsR498G0305372200.01.T01 | Upstream of FLC-like protein isoform X2                                     |
| maker-3-augustus-gene-45.63-mRNA-1   | Japonica | NA       |              | Os03g0192400 | OsR498G0305373600.01.T01 | NADH-ubiquinone oxidoreductase B16.6 subunit                                |

|                                     |          |          |           |              |                          |                                                                         |
|-------------------------------------|----------|----------|-----------|--------------|--------------------------|-------------------------------------------------------------------------|
| maker-3-augustus-gene-450.0-mRNA-1  | Japonica | NA       | NBS-TM    | Os03g0755100 | OsR498G0307065300.01.T01 | Transporter associated with antigen processing protein 2                |
| maker-3-augustus-gene-450.12-mRNA-1 | Japonica | NA       |           | Os03g0756000 | OsR498G0307069700.01.T01 | Putative ribosomal protein L13                                          |
| maker-3-augustus-gene-450.16-mRNA-1 | Japonica | Japonica |           | Os03g0755700 | OsR498G0307068000.01.T02 | Large subunit ribosomal protein L13Ae                                   |
| maker-3-augustus-gene-450.21-mRNA-1 | Japonica | Indica   |           | Os03g0755600 | OsR498G0307068600.01.T02 | FCP1 homology domain-containing protein (Fragment)                      |
| maker-3-augustus-gene-450.27-mRNA-1 | Japonica | NA       |           | Os03g0756300 | OsR498G0307070600.01.T01 | X8 domain-containing protein (Fragment)                                 |
| maker-3-augustus-gene-450.29-mRNA-1 | Japonica | NA       |           | Os03g0756400 | OsR498G0307070800.01.T01 | Transmembrane protein adipocyte-associated                              |
| maker-3-augustus-gene-450.6-mRNA-1  | Japonica | NA       |           | Os03g0755600 | OsR498G0307066700.01.T01 | FCP1 homology domain-containing protein (Fragment)                      |
| maker-3-augustus-gene-451.40-mRNA-1 | Japonica | NA       |           | Os03g0756800 | OsR498G0307071300.01.T01 | Glycosyltransferase                                                     |
| maker-3-augustus-gene-451.42-mRNA-1 | Japonica | NA       |           | Os03g0757500 | OsR498G0307073700.01.T01 | UDP-glycosyltransferase 83A1                                            |
| maker-3-augustus-gene-451.46-mRNA-1 | Japonica | NA       |           | Os03g0758300 | OsR498G0307078700.01.T02 | Cyclic nucleotide gated channel, other eukaryote                        |
| maker-3-augustus-gene-451.56-mRNA-1 | Japonica | NA       |           | Os03g0757200 | OsR498G0307073400.01.T02 | UDP-glucuronosyl and UDP-glucosyl transferase family protein, expressed |
| maker-3-augustus-gene-451.58-mRNA-1 | Japonica | NA       |           | Os03g0758000 | OsR498G0307077000.01.T01 | WRKY DNA binding domain containing protein, expressed                   |
| maker-3-augustus-gene-451.60-mRNA-1 | Japonica | NA       |           |              | OsR498G0307078200.01.T03 | Alpha-glucan phosphorylase 1                                            |
| maker-3-augustus-gene-452.0-mRNA-1  | Japonica | NA       |           |              | OsR498G0307078900.01.T01 | 26S proteasome non-ATPase regulatory subunit like                       |
| maker-3-augustus-gene-452.10-mRNA-1 | Japonica | NA       |           | Os03g0758800 | OsR498G0307081100.01.T01 | Eukaryotic translation initiation factor 5A                             |
| maker-3-augustus-gene-452.16-mRNA-1 | Japonica | NA       |           | Os03g0758900 |                          | WRKY DNA binding domain containing protein, expressed                   |
| maker-3-augustus-gene-452.25-mRNA-1 | Japonica | NA       |           | Os03g0759500 | OsR498G0307082500.01.T01 | Origin of replication complex subunit like                              |
| maker-3-augustus-gene-452.3-mRNA-1  | Japonica | Indica   |           | Os03g0758600 | OsR498G0307080500.01.T05 |                                                                         |
| maker-3-augustus-gene-452.35-mRNA-1 | Japonica | NA       |           | Os03g0760200 | OsR498G0307084500.01.T01 | Isoflavone 2'-hydroxylase                                               |
| maker-3-augustus-gene-452.37-mRNA-1 | Japonica | Indica   |           | Os03g0760500 | OsR498G0307084700.01.T03 | Isoflavone 2'-hydroxylase                                               |
| maker-3-augustus-gene-452.39-mRNA-1 | Japonica | NA       |           | Os03g0758500 | OsR498G0307079200.01.T01 | Phytoecyanin domain-containing protein (Fragment)                       |
| maker-3-augustus-gene-452.41-mRNA-1 | Japonica | NA       |           |              | OsR498G0307081600.01.T02 | DUF1336 domain-containing protein (Fragment)                            |
| maker-3-augustus-gene-452.5-mRNA-1  | Japonica | NA       |           |              | OsR498G0307080900.01.T03 | Mitotic checkpoint protein BUB3.3                                       |
| maker-3-augustus-gene-453.0-mRNA-1  | Japonica | Japonica |           | Os03g0760500 | OsR498G0307084700.01.T03 | Isoflavone 2'-hydroxylase                                               |
| maker-3-augustus-gene-453.10-mRNA-1 | Japonica | NA       |           | Os03g0761900 | OsR498G0307088300.01.T02 | Prolyl 4-hydroxylase alpha subunit                                      |
| maker-3-augustus-gene-453.15-mRNA-1 | Japonica | NA       |           | Os03g0762300 | OsR498G0307090300.01.T01 | Peroxidase                                                              |
| maker-3-augustus-gene-453.18-mRNA-1 | Japonica | NA       |           | Os03g0762400 | OsR498G0307090900.01.T02 | Peroxidase                                                              |
| maker-3-augustus-gene-453.2-mRNA-1  | Japonica | NA       |           | Os03g0760700 | OsR498G0307085100.01.T01 | Aspartate-semialdehyde dehydrogenase                                    |
| maker-3-augustus-gene-453.21-mRNA-1 | Japonica | NA       |           | Os03g0762500 | OsR498G0307091500.01.T02 |                                                                         |
| maker-3-augustus-gene-453.23-mRNA-1 | Japonica | NA       |           | Os03g0760600 | OsR498G0307085000.01.T01 | Tonoplast intrinsic protein 41                                          |
| maker-3-augustus-gene-453.27-mRNA-1 | Japonica | NA       |           | Os03g0760800 | OsR498G0307085600.01.T01 | Peamaclein                                                              |
| maker-3-augustus-gene-453.29-mRNA-1 | Japonica | Indica   |           | Os03g0761000 | OsR498G0307086400.01.T01 | SWIB domain-containing protein (Fragment)                               |
| maker-3-augustus-gene-453.31-mRNA-1 | Japonica | Indica   |           | Os07g0114000 | OsR498G0307086600.01.T01 | Protein-serine/threonine phosphatase                                    |
| maker-3-augustus-gene-453.35-mRNA-1 | Japonica | NA       |           | Os03g0761200 | OsR498G0307086800.01.T01 | Protein arginine N-methyltransferase 2                                  |
| maker-3-augustus-gene-453.37-mRNA-1 | Japonica | Indica   | Kinase-TM | Os07g0114400 | OsR498G0307088600.01.T01 | Casein kinase II alpha subunit                                          |
| maker-3-augustus-gene-453.42-mRNA-1 | Japonica | NA       |           | Os03g0762100 | OsR498G0307089000.01.T01 | Glycosyltransferase-like protein                                        |
| maker-3-augustus-gene-453.7-mRNA-1  | Japonica | NA       |           | Os03g0761700 | OsR498G0307088100.01.T04 | J domain-containing protein                                             |
| maker-3-augustus-gene-454.0-mRNA-1  | Japonica | NA       |           | Os03g0762900 | OsR498G0307093700.01.T01 | Protein SNOWY COTYLEDON 3                                               |
| maker-3-augustus-gene-454.10-mRNA-1 | Japonica | NA       |           |              | OsR498G0307097300.01.T01 | BHLH domain-containing protein (Fragment)                               |
| maker-3-augustus-gene-454.12-mRNA-1 | Japonica | NA       |           |              | OsR498G0307097900.01.T02 | Upstream activation factor subunit spp27 like                           |
| maker-3-augustus-gene-454.18-mRNA-1 | Japonica | NA       |           | Os03g0764600 | OsR498G0307099100.01.T01 | HTH myb-type domain-containing protein                                  |
| maker-3-augustus-gene-454.22-mRNA-1 | Japonica | NA       | Kinase-TM | Os03g0764300 | OsR498G0307097600.01.T02 | Mitogen-activated protein kinase kinase kinase 5                        |
| maker-3-augustus-gene-454.4-mRNA-1  | Japonica | NA       | Kinase-TM | Os03g0763000 | OsR498G0307094500.01.T01 | Casein kinase II subunit alpha                                          |
| maker-3-augustus-gene-454.7-mRNA-1  | Japonica | NA       |           | Os03g0764000 | OsR498G0307096300.01.T01 | probable N-acetyltransferase HLS1                                       |
| maker-3-augustus-gene-455.0-mRNA-1  | Japonica | NA       | Kinase-TM | Os03g0764800 | OsR498G0307099900.01.T01 | Serine/threonine-protein kinase SAPK8                                   |
| maker-3-augustus-gene-455.13-mRNA-1 | Japonica | NA       |           |              | OsR498G0307103200.01.T02 | Nuclear pore complex protein isoform 1                                  |
| maker-3-augustus-gene-455.15-mRNA-1 | Japonica | NA       |           | Os03g0765400 | OsR498G0307103200.01.T04 | CCG-binding protein 1                                                   |
| maker-3-augustus-gene-455.18-mRNA-1 | Japonica | NA       |           |              | OsR498G0307103400.01.T01 | CCG-binding protein 1                                                   |
| maker-3-augustus-gene-455.22-mRNA-1 | Japonica | Japonica |           | Os03g0766000 | OsR498G0307105200.01.T02 | Transmembrane protein 147                                               |
| maker-3-augustus-gene-455.4-mRNA-1  | Japonica | NA       |           |              | OsR498G0307101900.01.T03 | Non-specific serine/threonine protein kinase                            |
| maker-3-augustus-gene-455.7-mRNA-1  | Japonica | NA       |           |              | OsR498G0307102300.01.T01 | Non-specific serine/threonine protein kinase                            |
| maker-3-augustus-gene-455.9-mRNA-1  | Japonica | NA       |           | Os03g0765200 | OsR498G0307102600.01.T02 | Thylakoidal processing peptidase 1 chloroplastic                        |
| maker-3-augustus-gene-456.0-mRNA-1  | Japonica | NA       |           | Os03g0766500 | OsR498G0307106700.01.T01 | probable transcription factor KAN4                                      |
| maker-3-augustus-gene-456.12-mRNA-1 | Japonica | NA       |           | Os03g0767500 | OsR498G0307108800.01.T01 | Thioredoxin-like protein HCF164, chloroplastic                          |
| maker-3-augustus-gene-456.15-mRNA-1 | Japonica | NA       |           | Os03g0769000 | OsR498G0307111200.01.T01 | Ternary complex factor MIP1                                             |
| maker-3-augustus-gene-456.19-mRNA-1 | Japonica | NA       |           |              | OsR498G0307111800.01.T04 | Forkhead box protein like                                               |
| maker-3-augustus-gene-456.5-mRNA-1  | Japonica | NA       |           | Os03g0767800 | OsR498G0307109500.01.T01 | Cold-regulated plasma membrane protein 2                                |
| maker-3-augustus-gene-456.9-mRNA-1  | Japonica | NA       |           | Os03g0767900 | OsR498G0307109900.01.T01 | BTB domain-containing protein                                           |
| maker-3-augustus-gene-457.0-mRNA-1  | Japonica | NA       |           | Os03g0769400 | OsR498G0307113100.01.T04 | BTB domain-containing protein                                           |
| maker-3-augustus-gene-457.14-mRNA-1 | Japonica | Indica   |           | Os03g0770800 | OsR498G0307119200.01.T01 | Xyloglucan 6-xylosyltransferase                                         |
| maker-3-augustus-gene-457.17-mRNA-1 | Japonica | NA       |           | Os03g0770900 | OsR498G0307119800.01.T01 | Neurofilament heavy polypeptide isoform X1                              |

|                                     |          |          |               |              |                          |                                                                           |
|-------------------------------------|----------|----------|---------------|--------------|--------------------------|---------------------------------------------------------------------------|
| maker-3-augustus-gene-457.2-mRNA-1  | Japonica | Indica   |               | Os03g0769800 | OsR498G0307114700.01.T05 | Homeobox-leucine zipper protein REVOLUTA                                  |
| maker-3-augustus-gene-457.5-mRNA-1  | Japonica | NA       |               |              | OsR498G0307118700.01.T01 | AP2-like ethylene-responsive transcription factor ANT                     |
| maker-3-augustus-gene-457.9-mRNA-1  | Japonica | NA       | TM            | Os03g0769600 | OsR498G0307113800.01.T02 | C-type cytochrome synthesis protein1                                      |
| maker-3-augustus-gene-458.0-mRNA-1  | Japonica | NA       |               | Os03g0771500 | OsR498G0307121900.01.T01 | Homeobox protein knotted-1-like 8                                         |
| maker-3-augustus-gene-458.1-mRNA-1  | Japonica | Indica   |               | Os03g0771500 | OsR498G0307123100.01.T01 | Homeobox protein rough sheath 1                                           |
| maker-3-augustus-gene-458.10-mRNA-1 | Japonica | NA       |               | Os03g0772800 | OsR498G0307126300.01.T01 | Cytochrome c oxidase subunit VIa                                          |
| maker-3-augustus-gene-458.15-mRNA-1 | Japonica | NA       |               | Os03g0771100 | OsR498G0307120600.01.T01 | Transcription factor RAX3                                                 |
| maker-3-augustus-gene-458.17-mRNA-1 | Japonica | Indica   |               | Os03g0241100 | OsR498G0307128400.01.T02 | TSL-kinase interacting protein 1                                          |
| maker-3-augustus-gene-458.26-mRNA-1 | Japonica | Indica   |               | Os03g0773150 | OsR498G0307128600.01.T01 | Ribosomal protein S14p/S29e containing protein, expressed                 |
| maker-3-augustus-gene-458.28-mRNA-1 | Japonica | NA       | Kinase-LRR-TM | Os03g0773300 | OsR498G0307128800.01.T01 | Putative LRR receptor-like serine/threonine-protein kinase                |
| maker-3-augustus-gene-459.39-mRNA-1 | Japonica | Indica   | Kinase-LRR-TM | Os03g0773700 | OsR498G0307131300.01.T03 | Leucine-rich repeat receptor-like serine/threonine-protein kinase BAM1    |
| maker-3-augustus-gene-459.41-mRNA-1 | Japonica | NA       |               |              |                          |                                                                           |
| maker-3-augustus-gene-459.44-mRNA-1 | Japonica | NA       |               | Os03g0774600 | OsR498G0307133500.01.T02 |                                                                           |
| maker-3-augustus-gene-459.47-mRNA-1 | Japonica | NA       |               | Os03g0775200 | OsR498G0307136100.01.T01 | tRNA 4-demethylwyosine synthase (AdoMet-dependent)                        |
| maker-3-augustus-gene-459.53-mRNA-1 | Japonica | NA       |               | Os03g0773800 | OsR498G0307131800.01.T01 | Malate dehydrogenase                                                      |
| maker-3-augustus-gene-459.57-mRNA-1 | Japonica | NA       |               | Os03g0774200 | OsR498G0307132600.01.T01 | NADH-ubiquinone oxidoreductase 23 kDa subunit                             |
| maker-3-augustus-gene-459.61-mRNA-1 | Japonica | Indica   |               | Os03g0774300 | OsR498G0307133000.01.T01 | 5'-nucleotidase domain-containing protein 4 isoform X1                    |
| maker-3-augustus-gene-459.69-mRNA-1 | Japonica | NA       |               | Os03g0774700 |                          |                                                                           |
| maker-3-augustus-gene-459.71-mRNA-1 | Japonica | Japonica |               | Os03g0775000 | OsR498G0307135200.01.T01 | S-adenosyl-L-methionine-dependent methyltransferase                       |
| maker-3-augustus-gene-46.0-mRNA-1   | Japonica | NA       |               | Os03g0192500 | OsR498G0305373900.01.T02 | PPM-type phosphatase domain-containing protein                            |
| maker-3-augustus-gene-46.19-mRNA-1  | Japonica | NA       |               | Os03g0193075 | OsR498G0305375500.01.T01 | Yippee domain-containing protein                                          |
| maker-3-augustus-gene-46.21-mRNA-1  | Japonica | NA       |               |              |                          | Pumilio domain-containing protein                                         |
| maker-3-augustus-gene-46.24-mRNA-1  | Japonica | Japonica |               | Os03g0193400 | OsR498G0917271000.01.T02 | Flavin containing polyamine oxidase                                       |
| maker-3-augustus-gene-46.29-mRNA-1  | Japonica | NA       |               | Os03g0192600 | OsR498G0305374200.01.T01 | AAI domain-containing protein (Fragment)                                  |
| maker-3-augustus-gene-46.32-mRNA-1  | Japonica | NA       |               | Os03g0192700 | OsR498G0305374400.01.T04 | Myo-inositol 1-phosphate synthase                                         |
| maker-3-augustus-gene-46.40-mRNA-1  | Japonica | NA       |               | Os03g0193225 | OsR498G0305376000.01.T01 |                                                                           |
| maker-3-augustus-gene-46.42-mRNA-1  | Japonica | NA       |               |              | OsR498G0305376800.01.T01 | Mutator-like transposase                                                  |
| maker-3-augustus-gene-46.6-mRNA-1   | Japonica | NA       |               |              | OsR498G0305374900.01.T06 | Ubiquitinyl hydrolase 1                                                   |
| maker-3-augustus-gene-460.49-mRNA-1 | Japonica | Indica   |               | Os03g0775300 | OsR498G0307136300.01.T01 | S-adenosyl-L-methionine-dependent tRNA 4-demethylwyosine synthase         |
| maker-3-augustus-gene-460.55-mRNA-1 | Japonica | NA       |               | Os03g0775500 | OsR498G0307136700.01.T01 | DUF59 domain-containing protein                                           |
| maker-3-augustus-gene-460.59-mRNA-1 | Japonica | NA       |               | Os03g0775600 | OsR498G0307137300.01.T01 | 2-hydroxyacid dehydrogenase                                               |
| maker-3-augustus-gene-460.61-mRNA-1 | Japonica | NA       |               | Os03g0775700 | OsR498G0307137500.01.T01 | VARLMGL domain-containing protein (Fragment)                              |
| maker-3-augustus-gene-460.64-mRNA-1 | Japonica | NA       |               | Os03g0776000 | OsR498G0307138100.01.T06 | Glucose-6-phosphate isomerase                                             |
| maker-3-augustus-gene-460.74-mRNA-1 | Japonica | Indica   |               | Os03g0776900 | OsR498G0307140500.01.T01 | Mitochondrial import inner membrane translocase subunit TIM14             |
| maker-3-augustus-gene-460.78-mRNA-1 | Japonica | NA       | ONAC066       | Os03g0777000 | OsR498G0307142500.01.T01 | Transcription factor JUNGBRUNNEN 1                                        |
| maker-3-augustus-gene-460.80-mRNA-1 | Japonica | NA       | Kinase-TM     | Os03g0776100 | OsR498G0307138400.01.T01 | proline-rich receptor-like protein kinase PERK4                           |
| maker-3-augustus-gene-460.82-mRNA-1 | Japonica | Indica   |               | Os03g0777100 | OsR498G0307142800.01.T01 | Dentin sialophosphoprotein-like protein                                   |
| maker-3-augustus-gene-460.87-mRNA-1 | Japonica | NA       |               | Os03g0777500 | OsR498G0307143600.01.T01 | Hydroperoxide lyase, putative isoform 1                                   |
| maker-3-augustus-gene-461.36-mRNA-1 | Japonica | Indica   |               | Os03g0777600 | OsR498G0307143900.01.T01 | Hexosyltransferase                                                        |
| maker-3-augustus-gene-461.40-mRNA-1 | Japonica | NA       |               | Os03g0778000 | OsR498G0307145300.01.T04 | Protein kinase domain-containing protein                                  |
| maker-3-augustus-gene-461.46-mRNA-1 | Japonica | NA       |               |              |                          | protein FAR-RED IMPAIRED RESPONSE 1-like                                  |
| maker-3-augustus-gene-463.0-mRNA-1  | Japonica | NA       |               |              | OsR498G0307158500.01.T05 | Actin-related protein 7 isoform 1                                         |
| maker-3-augustus-gene-463.10-mRNA-1 | Japonica | NA       |               | Os03g0783700 | OsR498G0307165000.01.T01 | AP complex subunit sigma                                                  |
| maker-3-augustus-gene-463.13-mRNA-1 | Japonica | NA       |               | Os03g0784100 | OsR498G0307166200.01.T01 | Patatin-like protein 3                                                    |
| maker-3-augustus-gene-464.34-mRNA-1 | Japonica | NA       |               | Os03g0784400 | OsR498G0307166900.01.T01 | Endoplasmic reticulum vesicle transporter, C-terminal                     |
| maker-3-augustus-gene-464.40-mRNA-1 | Japonica | NA       |               | Os03g0785500 | OsR498G0307168700.01.T01 | ALA-interacting subunit                                                   |
| maker-3-augustus-gene-464.44-mRNA-1 | Japonica | NA       |               | Os03g0786000 | OsR498G0307170100.01.T01 | (S)-2-hydroxy-acid oxidase                                                |
| maker-3-augustus-gene-464.46-mRNA-1 | Japonica | NA       |               | Os03g0786100 | OsR498G0307170300.01.T03 | (S)-2-hydroxy-acid oxidase                                                |
| maker-3-augustus-gene-464.52-mRNA-1 | Japonica | NA       |               | Os03g0784300 |                          |                                                                           |
| maker-3-augustus-gene-464.57-mRNA-1 | Japonica | Indica   |               | Os07g0147800 | OsR498G0307167200.01.T05 | WPP domain-associated protein-like                                        |
| maker-3-augustus-gene-464.60-mRNA-1 | Japonica | NA       |               | Os03g0784700 | OsR498G0307167400.01.T01 | Ferredoxin--NADP reductase, chloroplastic                                 |
| maker-3-augustus-gene-464.64-mRNA-1 | Japonica | Indica   |               | Os04g0613400 | OsR498G0307167600.01.T01 | CCR4-NOT transcription complex subunit 9                                  |
| maker-3-augustus-gene-464.69-mRNA-1 | Japonica | Indica   |               | Os07g0150500 | OsR498G0307168600.01.T03 | C3HC-type domain-containing protein (Fragment)                            |
| maker-3-augustus-gene-465.0-mRNA-1  | Japonica | NA       |               | Os03g0786700 | OsR498G0307172700.01.T01 | tRNA (guanine(26)-N(2))-dimethyltransferase                               |
| maker-3-augustus-gene-465.13-mRNA-1 | Japonica | NA       |               | Os03g0786900 | OsR498G0307173100.01.T07 | Protein with predicted involvement in meiosis (GSG1)                      |
| maker-3-augustus-gene-465.24-mRNA-1 | Japonica | NA       |               | Os03g0788200 | OsR498G0307176300.01.T01 | MD-2-related lipid recognition domain-containing protein / ML domain-cont |
| maker-3-augustus-gene-465.30-mRNA-1 | Japonica | Indica   |               | Os03g0647800 | OsR498G0307173600.01.T01 | Putative glycosyl transferase Gly (Fragment)                              |
| maker-3-augustus-gene-465.33-mRNA-1 | Japonica | NA       |               | Os03g0787200 | OsR498G0307173800.01.T01 | IQ-domain 5                                                               |
| maker-3-augustus-gene-465.37-mRNA-1 | Japonica | NA       |               | Os03g0813700 | OsR498G0307175200.01.T01 |                                                                           |
| maker-3-augustus-gene-465.6-mRNA-1  | Japonica | NA       |               |              | OsR498G0307172900.01.T03 | Cullin-4 isoform B                                                        |
| maker-3-augustus-gene-466.43-mRNA-1 | Japonica | NA       |               | Os03g0788500 | OsR498G0307176900.01.T01 | Calcium-dependent protein kinase                                          |

|                                     |          |          |               |              |                          |                                                                       |
|-------------------------------------|----------|----------|---------------|--------------|--------------------------|-----------------------------------------------------------------------|
| maker-3-augustus-gene-466.46-mRNA-1 | Japonica | NA       |               |              | OsR498G0307180500.01.T03 | Putative post-transcriptional gene silencing PAZ-Argonaute family     |
| maker-3-augustus-gene-466.53-mRNA-1 | Japonica | NA       |               |              | OsR498G1221698500.01.T04 | Phosphate synthase-like                                               |
| maker-3-augustus-gene-466.57-mRNA-1 | Japonica | NA       |               | Os03g0788400 |                          |                                                                       |
| maker-3-augustus-gene-466.59-mRNA-1 | Japonica | NA       |               | Os03g0788700 | OsR498G0307177800.01.T02 | Fasciclin-like arabinogalactan protein 16                             |
| maker-3-augustus-gene-466.62-mRNA-1 | Japonica | NA       |               | Os03g0788800 | OsR498G0307178000.01.T02 | E3 ubiquitin-protein ligase RHF2A isoform B                           |
| maker-3-augustus-gene-466.67-mRNA-1 | Japonica | NA       |               | Os03g0789000 | OsR498G0307178600.01.T01 | Calcium-dependent protein kinase                                      |
| maker-3-augustus-gene-466.69-mRNA-1 | Japonica | NA       |               | Os03g0789200 | OsR498G0307179400.01.T01 | GTD-binding domain-containing protein (Fragment)                      |
| maker-3-augustus-gene-466.72-mRNA-1 | Japonica | NA       |               | Os06g0507101 | OsR498G1120660600.01.T01 |                                                                       |
| maker-3-augustus-gene-466.74-mRNA-1 | Japonica | NA       |               | Os03g0789900 | OsR498G0307181400.01.T05 |                                                                       |
| maker-3-augustus-gene-467.1-mRNA-1  | Japonica | NA       |               |              | OsR498G0307183500.01.T05 | Glutamate carboxypeptidase II                                         |
| maker-3-augustus-gene-467.11-mRNA-1 | Japonica | NA       | Kinase-LRR-TM | Os03g0791700 | OsR498G0307187900.01.T02 | Leucine-rich repeat transmembrane protein kinase, putative, expressed |
| maker-3-augustus-gene-467.15-mRNA-1 | Japonica | NA       |               | Os03g0790900 | OsR498G0307183800.01.T01 | Indole-3-acetaldehyde oxidase                                         |
| maker-3-augustus-gene-467.16-mRNA-1 | Japonica | NA       |               | Os03g0790900 | OsR498G0307184200.01.T01 | Indole-3-acetaldehyde oxidase                                         |
| maker-3-augustus-gene-467.2-mRNA-1  | Japonica | NA       |               |              |                          | Lob domain-containing protein 4                                       |
| maker-3-augustus-gene-467.31-mRNA-1 | Japonica | NA       |               | Os03g0790700 | OsR498G0307184200.01.T02 | Aldehyde oxidase2                                                     |
| maker-3-augustus-gene-467.33-mRNA-1 | Japonica | NA       |               |              | OsR498G0307185600.01.T01 | Phytocyanin domain-containing protein (Fragment)                      |
| maker-3-augustus-gene-467.35-mRNA-1 | Japonica | NA       |               |              | OsR498G0307186400.01.T02 | 25.3 kDa vesicle transport protein, putative, expressed               |
| maker-3-augustus-gene-467.41-mRNA-1 | Japonica | NA       |               |              | OsR498G0307188200.01.T05 | UBC core domain-containing protein (Fragment)                         |
| maker-3-augustus-gene-468.48-mRNA-1 | Japonica | NA       |               | Os03g0792400 | OsR498G0307189300.01.T05 | Sterol regulatory element-binding protein site 2 protease             |
| maker-3-augustus-gene-468.54-mRNA-1 | Japonica | NA       |               | Os03g0792500 | OsR498G0307189500.01.T03 | BTB/POZ and MATH domain-containing protein 4                          |
| maker-3-augustus-gene-468.59-mRNA-1 | Japonica | Indica   |               | Os03g0792800 | OsR498G0307190300.01.T02 | Glucan endo-1,3-beta-D-glucosidase                                    |
| maker-3-augustus-gene-468.61-mRNA-1 | Japonica | NA       |               | Os03g0793500 | OsR498G0307192700.01.T08 | Casein kinase (Serine/threonine/tyrosine protein kinase)              |
| maker-3-augustus-gene-468.69-mRNA-1 | Japonica | Indica   |               | Os03g0793600 | OsR498G0307193300.01.T03 | Type IV inositol polyphosphate 5-phosphatase 6                        |
| maker-3-augustus-gene-468.78-mRNA-1 | Japonica | NA       |               | Os03g0793700 | OsR498G0307193900.01.T01 | Globulin-2                                                            |
| maker-3-augustus-gene-468.80-mRNA-1 | Japonica | NA       |               | Os03g0792600 | OsR498G0307189800.01.T01 | Repliation factor C subunit like                                      |
| maker-3-augustus-gene-468.85-mRNA-1 | Japonica | NA       |               | Os03g0792900 | OsR498G0307190600.01.T03 | Zinc finger A20 and AN1 domain-containing stress-associated protein 6 |
| maker-3-augustus-gene-468.86-mRNA-1 | Japonica | NA       |               | Os03g0793100 | OsR498G1119421100.01.T02 | Glycosyltransferases                                                  |
| maker-3-augustus-gene-468.89-mRNA-1 | Japonica | NA       |               | Os03g0793800 | OsR498G0307194200.01.T02 | AAI domain-containing protein                                         |
| maker-3-augustus-gene-468.91-mRNA-1 | Japonica | Indica   |               | Os03g0793900 | OsR498G0307194800.01.T01 | AAI domain-containing protein (Fragment)                              |
| maker-3-augustus-gene-468.94-mRNA-1 | Japonica | NA       |               | Os03g0794500 | OsR498G0307196200.01.T02 | GdhA protein (Fragment)                                               |
| maker-3-augustus-gene-469.0-mRNA-1  | Japonica | NA       |               | Os03g0794800 | OsR498G0307196700.01.T01 | 5'-3' exoribonuclease                                                 |
| maker-3-augustus-gene-469.14-mRNA-1 | Japonica | NA       |               | Os03g0795900 | OsR498G0307199500.01.T02 | Heat shock transcription factor                                       |
| maker-3-augustus-gene-469.16-mRNA-1 | Japonica | Indica   |               | Os03g0796000 | OsR498G0307199900.01.T03 | Stem-specific protein TSJT1                                           |
| maker-3-augustus-gene-469.20-mRNA-1 | Japonica | NA       |               | Os03g0794700 | OsR498G0307196600.01.T01 | 40S ribosomal protein S18                                             |
| maker-3-augustus-gene-469.22-mRNA-1 | Japonica | Japonica |               | Os03g0795000 | OsR498G0307197200.01.T03 | Folate-biopterin transporter 1 chloroplastic                          |
| maker-3-augustus-gene-469.25-mRNA-1 | Japonica | NA       | LRR-TM        | Os03g0795300 | OsR498G0307198000.01.T01 | Leucine-rich repeat extensin-like protein 6                           |
| maker-3-augustus-gene-469.27-mRNA-1 | Japonica | NA       |               | Os03g0795600 | OsR498G0307199000.01.T01 | Transmembrane BAX inhibitor motif-containing protein 4                |
| maker-3-augustus-gene-469.29-mRNA-1 | Japonica | NA       |               | Os03g0795800 | OsR498G0307199400.01.T01 | Transmembrane BAX inhibitor motif-containing protein 4                |
| maker-3-augustus-gene-469.32-mRNA-1 | Japonica | NA       |               | Os03g0796400 | OsR498G0307202000.01.T02 | ENT domain-containing protein (Fragment)                              |
| maker-3-augustus-gene-469.34-mRNA-1 | Japonica | NA       |               | Os03g0796501 | OsR498G0307202600.01.T02 | Ribosomal protein L4/L1 family                                        |
| maker-3-augustus-gene-469.5-mRNA-1  | Japonica | NA       |               | Os03g0794900 | OsR498G0307196900.01.T01 | 5'-3' exoribonuclease 4                                               |
| maker-3-augustus-gene-469.9-mRNA-1  | Japonica | NA       |               | Os03g0795500 | OsR498G0307198700.01.T01 | PITH domain-containing protein isoform A                              |
| maker-3-augustus-gene-47.41-mRNA-1  | Japonica | Japonica |               | Os03g0193900 | OsR498G0101213400.01.T05 |                                                                       |
| maker-3-augustus-gene-47.43-mRNA-1  | Japonica | NA       |               | Os03g0194400 | OsR498G0305379300.01.T04 | N-acetyltransferase 9-like protein isoform X2                         |
| maker-3-augustus-gene-47.46-mRNA-1  | Japonica | NA       |               |              | OsR498G0305379500.01.T01 | Mitochondrial import inner membrane translocase subunit TIM22         |
| maker-3-augustus-gene-47.49-mRNA-1  | Japonica | NA       |               | Os03g0194900 | OsR498G0305380500.01.T01 | Cytochrome b561 and DOMON domain-containing protein                   |
| maker-3-augustus-gene-47.51-mRNA-1  | Japonica | NA       |               | Os03g0195100 | OsR498G0305381100.01.T01 | LL-diaminopimelate aminotransferase, chloroplastic                    |
| maker-3-augustus-gene-47.53-mRNA-1  | Japonica | NA       |               | Os03g0195200 | OsR498G0305381400.01.T02 | 18S rRNA aminocarboxypropyltransferase                                |
| maker-3-augustus-gene-47.58-mRNA-1  | Japonica | NA       |               | Os03g0195300 | OsR498G0305381800.01.T01 | Low affinity sulfate transporter 3-like                               |
| maker-3-augustus-gene-47.62-mRNA-1  | Japonica | NA       |               |              | OsR498G0305382000.01.T01 | Low affinity sulfate transporter like                                 |
| maker-3-augustus-gene-470.0-mRNA-1  | Japonica | NA       |               | Os03g0796600 | OsR498G0307206300.01.T02 | Plant-specific domain TIGR01615 family protein                        |
| maker-3-augustus-gene-470.14-mRNA-1 | Japonica | NA       |               | Os03g0797700 | OsR498G0307212300.01.T01 | rRNA-processing protein EFG1                                          |
| maker-3-augustus-gene-470.19-mRNA-1 | Japonica | NA       |               | Os03g0796900 | OsR498G0307208200.01.T01 | Opaque-2 heterodimerizing protein 1b                                  |
| maker-3-augustus-gene-470.2-mRNA-1  | Japonica | Indica   |               | Os07g0181700 | OsR498G0307207900.01.T01 | GB1/RHD3-type G domain-containing protein                             |
| maker-3-augustus-gene-470.26-mRNA-1 | Japonica | Indica   |               | Os03g0797550 | OsR498G0307210400.01.T01 | Tryptophan synthase                                                   |
| maker-3-augustus-gene-470.30-mRNA-1 | Japonica | Japonica |               | Os03g0797550 | OsR498G0307211000.01.T02 | Tryptophan synthase                                                   |
| maker-3-augustus-gene-471.42-mRNA-1 | Japonica | NA       |               | Os03g0798200 | OsR498G0307214900.01.T02 | E3 ubiquitin protein ligase DRIP2                                     |
| maker-3-augustus-gene-471.47-mRNA-1 | Japonica | NA       |               |              | OsR498G0307215300.01.T03 | DNA (cytosine-5)-methyltransferase                                    |
| maker-3-augustus-gene-471.50-mRNA-1 | Japonica | Japonica |               | Os03g0798500 | OsR498G0307216100.01.T01 | WRKY DNA binding domain containing protein, expressed                 |
| maker-3-augustus-gene-471.53-mRNA-1 | Japonica | NA       |               | Os03g0799000 | OsR498G0307217700.01.T01 | H15 domain-containing protein (Fragment)                              |
| maker-3-augustus-gene-471.55-mRNA-1 | Japonica | NA       |               | Os03g0799100 | OsR498G0307217900.01.T01 | TPX2 (Targeting protein for Xklp2) proteinfamily                      |

|                                     |          |          |           |              |                          |                                                      |
|-------------------------------------|----------|----------|-----------|--------------|--------------------------|------------------------------------------------------|
| maker-3-augustus-gene-471.59-mRNA-1 | Japonica | NA       |           | Os03g0799200 | OsR498G0307218100.01.T04 | GTD-binding domain-containing protein (Fragment)     |
| maker-3-augustus-gene-471.61-mRNA-1 | Japonica | NA       |           | Os03g0799500 | OsR498G0307218900.01.T01 | C-repeat binding transcription factor                |
| maker-3-augustus-gene-471.63-mRNA-1 | Japonica | NA       |           | Os03g0799600 | OsR498G0307219100.01.T02 | Chromatin remodeling protein EBS                     |
| maker-3-augustus-gene-471.66-mRNA-1 | Japonica | NA       |           | Os03g0799700 | OsR498G0307219300.01.T01 | Probable GTP-binding protein OBGC2                   |
| maker-3-augustus-gene-471.70-mRNA-1 | Japonica | NA       |           | Os03g0797800 | OsR498G0307212800.01.T01 | Auxin-responsive protein IAA14                       |
| maker-3-augustus-gene-471.72-mRNA-1 | Japonica | NA       |           | Os03g0797901 | OsR498G0307183800.01.T02 | Aldehyde oxidase2                                    |
| maker-3-augustus-gene-471.74-mRNA-1 | Japonica | Japonica |           | Os03g0798000 | OsR498G0307214400.01.T01 | Aldehyde oxidase1                                    |
| maker-3-augustus-gene-471.77-mRNA-1 | Japonica | NA       |           | Os03g0798600 | OsR498G0307216400.01.T01 | Ribosomal protein S19/S15                            |
| maker-3-augustus-gene-472.0-mRNA-1  | Japonica | Indica   |           | Os07g0187700 | OsR498G0307220100.01.T01 |                                                      |
| maker-3-augustus-gene-472.17-mRNA-1 | Japonica | Indica   |           | Os03g0801500 | OsR498G0307223100.01.T02 |                                                      |
| maker-3-augustus-gene-472.21-mRNA-1 | Japonica | NA       |           | Os03g0801600 | OsR498G0307223300.01.T01 | Vacuolar protein sorting-associated protein 35       |
| maker-3-augustus-gene-472.27-mRNA-1 | Japonica | NA       |           | Os03g0801800 | OsR498G0307223700.01.T02 | RNA-binding protein 28                               |
| maker-3-augustus-gene-472.3-mRNA-1  | Japonica | NA       |           |              | OsR498G0307220900.01.T02 | Cactin C-terminal domain-containing protein          |
| maker-3-augustus-gene-472.37-mRNA-1 | Japonica | NA       |           |              | OsR498G0307221200.01.T02 | Argonaute/Dicer protein                              |
| maker-3-augustus-gene-472.43-mRNA-1 | Japonica | NA       |           | Os03g0800500 | OsR498G0307221800.01.T01 | Xaa-Pro aminopeptidase 2                             |
| maker-3-augustus-gene-472.45-mRNA-1 | Japonica | NA       |           | Os03g0800700 | OsR498G0307222000.01.T01 | Thioredoxin like                                     |
| maker-3-augustus-gene-472.47-mRNA-1 | Japonica | NA       |           | Os03g0800800 | OsR498G0307222200.01.T03 | FHA domain containing protein, expressed             |
| maker-3-augustus-gene-472.51-mRNA-1 | Japonica | NA       |           | Os03g0801700 | OsR498G0307223600.01.T02 | FAD synthetase, chloroplastic                        |
| maker-3-augustus-gene-473.44-mRNA-1 | Japonica | NA       |           | Os03g0801900 | OsR498G0307224100.01.T01 | DUF569 domain-containing protein                     |
| maker-3-augustus-gene-473.48-mRNA-1 | Japonica | NA       |           | Os03g0803000 | OsR498G0307227300.01.T01 | Vesicle-associated membrane protein 721              |
| maker-3-augustus-gene-473.52-mRNA-1 | Japonica | NA       |           | Os03g0802300 | OsR498G0307225800.01.T03 | BTP domain-containing protein                        |
| maker-3-augustus-gene-473.57-mRNA-1 | Japonica | NA       |           |              | OsR498G0307226800.01.T01 | DEAD-box ATP-dependent RNA helicase 27               |
| maker-3-augustus-gene-473.65-mRNA-1 | Japonica | Indica   |           | Os07g0193600 | OsR498G0307227000.01.T01 | DDT domain-containing protein DDR4                   |
| maker-3-augustus-gene-473.72-mRNA-1 | Japonica | NA       |           | Os03g0802900 | OsR498G0307227200.01.T01 | Transcription factor BHLH089                         |
| maker-3-augustus-gene-476.53-mRNA-1 | Japonica | NA       |           | Os03g0808600 | OsR498G0307247900.01.T01 | Calcium-dependent protein kinase                     |
| maker-3-augustus-gene-476.58-mRNA-1 | Japonica | Indica   |           | Os07g0209100 | OsR498G0307248900.01.T01 | Galactinol--sucrose galactosyltransferase            |
| maker-3-augustus-gene-476.62-mRNA-1 | Japonica | NA       |           |              | OsR498G0307249700.01.T01 | BZIP transcription factor                            |
| maker-3-augustus-gene-476.77-mRNA-1 | Japonica | NA       |           | Os03g0809100 | OsR498G0307249400.01.T01 | MFS domain-containing protein (Fragment)             |
| maker-3-augustus-gene-477.0-mRNA-1  | Japonica | NA       |           | Os03g0809700 | OsR498G0307250900.01.T01 | Protein-serine/threonine phosphatase                 |
| maker-3-augustus-gene-477.12-mRNA-1 | Japonica | NA       |           |              | OsR498G0307250200.01.T01 | Protein-serine/threonine phosphatase                 |
| maker-3-augustus-gene-477.16-mRNA-1 | Japonica | NA       |           |              | OsR498G0307251200.01.T01 | Zinc finger, RING-type                               |
| maker-3-augustus-gene-477.20-mRNA-1 | Japonica | Indica   |           | Os07g0212300 | OsR498G0307253200.01.T01 | NUDIX hydrolase domain                               |
| maker-3-augustus-gene-477.23-mRNA-1 | Japonica | NA       |           | Os03g0810600 | OsR498G0307253800.01.T01 | Mitochondrial Rho GTPase                             |
| maker-3-augustus-gene-477.29-mRNA-1 | Japonica | Indica   |           | Os03g0810600 | OsR498G0307254000.01.T01 | EF hand family protein, expressed                    |
| maker-3-augustus-gene-477.31-mRNA-1 | Japonica | NA       |           | Os03g0810900 | OsR498G0307254600.01.T01 | PNPLA domain-containing protein (Fragment)           |
| maker-3-augustus-gene-477.5-mRNA-1  | Japonica | NA       |           | Os03g0809900 | OsR498G0307251300.01.T01 | RNA-binding protein 8A                               |
| maker-3-augustus-gene-477.8-mRNA-1  | Japonica | NA       |           | Os03g0810800 | OsR498G0307254300.01.T01 | Xanthoxin dehydrogenase                              |
| maker-3-augustus-gene-477.9-mRNA-1  | Japonica | NA       |           | Os03g0809300 | OsR498G0307250000.01.T01 | Protein-serine/threonine phosphatase                 |
| maker-3-augustus-gene-478.30-mRNA-1 | Japonica | NA       |           | Os03g0811100 | OsR498G0307254700.01.T01 | Mg-protoporphyrin IX chelatase                       |
| maker-3-augustus-gene-478.35-mRNA-1 | Japonica | NA       |           | Os03g0811200 | OsR498G0307254900.01.T02 | BRCA1 C Terminus domain containing protein expressed |
| maker-3-augustus-gene-478.39-mRNA-1 | Japonica | NA       |           | Os03g0811300 | OsR498G0307255100.01.T01 | AP complex subunit sigma                             |
| maker-3-augustus-gene-478.42-mRNA-1 | Japonica | NA       |           | Os03g0811400 | OsR498G0307255700.01.T02 | Transcription factor bHLH106                         |
| maker-3-augustus-gene-478.44-mRNA-1 | Japonica | NA       |           | Os03g0811900 | OsR498G0307258500.01.T05 | ADP-ribosylation factor A1F                          |
| maker-3-augustus-gene-478.48-mRNA-1 | Japonica | NA       |           | Os03g0811500 | OsR498G0307257200.01.T01 | PAPA-1 domain-containing protein (Fragment)          |
| maker-3-augustus-gene-478.51-mRNA-1 | Japonica | NA       |           |              | OsR498G0307257600.01.T04 | Peptidyl-prolyl cis-trans isomerase                  |
| maker-3-augustus-gene-478.56-mRNA-1 | Japonica | Indica   |           | Os03g0812000 | OsR498G0307258800.01.T02 | DNA gyrase subunit A chloroplastic/mitochondrial     |
| maker-3-augustus-gene-479.35-mRNA-1 | Japonica | NA       |           |              |                          | NAC domain-containing protein                        |
| maker-3-augustus-gene-479.37-mRNA-1 | Japonica | NA       |           | Os03g0813700 | OsR498G0307262100.01.T01 |                                                      |
| maker-3-augustus-gene-479.39-mRNA-1 | Japonica | NA       |           | Os03g0813200 |                          | Prohibitin                                           |
| maker-3-augustus-gene-479.42-mRNA-1 | Japonica | NA       |           |              | OsR498G0307266000.01.T02 | Prohibitin                                           |
| maker-3-augustus-gene-48.24-mRNA-1  | Japonica | NA       |           | Os03g0195800 | OsR498G0305383900.01.T02 | High affinity sulfate transporter 2                  |
| maker-3-augustus-gene-48.27-mRNA-1  | Japonica | NA       |           | Os03g0196000 | OsR498G0305385100.01.T01 | Sulfate anion transporter                            |
| maker-3-augustus-gene-48.32-mRNA-1  | Japonica | NA       |           |              | OsR498G0305394200.01.T01 | Small subunit ribosomal protein S10                  |
| maker-3-augustus-gene-480.0-mRNA-1  | Japonica | NA       |           | Os03g0815100 | OsR498G0307266700.01.T01 | Stress-induced transcription factor NAC1             |
| maker-3-augustus-gene-480.13-mRNA-1 | Japonica | NA       |           | Os03g0815200 | OsR498G0307267000.01.T01 | Methylenetetrahydrofolate reductase                  |
| maker-3-augustus-gene-480.19-mRNA-1 | Japonica | NA       |           | Os03g0815900 | OsR498G0307269000.01.T02 | Transcription elongation factor TFIIS                |
| maker-3-augustus-gene-480.2-mRNA-1  | Japonica | NA       |           | Os03g0815400 | OsR498G0307267300.01.T02 | Large subunit ribosomal protein L17                  |
| maker-3-augustus-gene-480.21-mRNA-1 | Japonica | Japonica |           | Os03g0816000 | OsR498G0307269200.01.T01 | U-box domain-containing protein 62                   |
| maker-3-augustus-gene-480.25-mRNA-1 | Japonica | Indica   | Kinase-TM | Os03g0816100 | OsR498G0307269400.01.T01 | Non-specific lipid-transfer protein-like isoform 1   |
| maker-3-augustus-gene-480.31-mRNA-1 | Japonica | NA       |           |              | OsR498G0307271600.01.T01 | Plant mobile domain protein family                   |
| maker-3-augustus-gene-480.33-mRNA-1 | Japonica | NA       |           | Os03g0816400 | OsR498G0307272000.01.T02 | EngB-type G domain-containing protein                |

|                                     |          |          |           |              |                          |                                                                                  |
|-------------------------------------|----------|----------|-----------|--------------|--------------------------|----------------------------------------------------------------------------------|
| maker-3-augustus-gene-480.37-mRNA-1 | Japonica | NA       |           | Os03g0816700 | OsR498G0307273800.01.T01 |                                                                                  |
| maker-3-augustus-gene-480.4-mRNA-1  | Japonica | NA       |           | Os03g0815700 | OsR498G0307268300.01.T01 | KH domain, STAR protein, homodimerization region                                 |
| maker-3-augustus-gene-480.8-mRNA-1  | Japonica | NA       |           | Os03g0816600 | OsR498G0307273500.01.T01 | Pentatricopeptide repeat-containing protein (Fragment)                           |
| maker-3-augustus-gene-481.32-mRNA-1 | Japonica | Indica   |           | Os03g0816900 | OsR498G0307274900.01.T01 | WH2 domain-containing protein                                                    |
| maker-3-augustus-gene-481.40-mRNA-1 | Japonica | NA       |           | Os03g0818000 |                          | Protein FLC EXPRESSOR                                                            |
| maker-3-augustus-gene-481.43-mRNA-1 | Japonica | NA       |           | Os03g0818100 | OsR498G0307279900.01.T02 | Multiple inositol polyphosphate phosphatase PhylIc                               |
| maker-3-augustus-gene-481.49-mRNA-1 | Japonica | NA       |           | Os03g0818200 |                          | Epimerase domain-containing protein                                              |
| maker-3-augustus-gene-481.51-mRNA-1 | Japonica | NA       |           | Os03g0817100 | OsR498G0307275400.01.T01 |                                                                                  |
| maker-3-augustus-gene-481.53-mRNA-1 | Japonica | NA       |           | Os03g0817500 | OsR498G0307277400.01.T01 | Trichome birefringence-like 34                                                   |
| maker-3-augustus-gene-481.55-mRNA-1 | Japonica | NA       |           |              |                          |                                                                                  |
| maker-3-augustus-gene-481.58-mRNA-1 | Japonica | NA       |           |              | OsR498G0307278600.01.T02 | Protein trichome birefringence-like 33                                           |
| maker-3-augustus-gene-481.62-mRNA-1 | Japonica | NA       |           | Os03g0817900 | OsR498G0307279400.01.T01 | Protein trichome birefringence-like protein 33                                   |
| maker-3-augustus-gene-481.66-mRNA-1 | Japonica | NA       |           | Os03g0818300 | OsR498G0307280200.01.T01 | ALFIN-like transcription factor                                                  |
| maker-3-augustus-gene-481.68-mRNA-1 | Japonica | NA       |           | Os03g0818400 | OsR498G0307280400.01.T01 | 40S ribosomal protein S23                                                        |
| maker-3-augustus-gene-482.42-mRNA-1 | Japonica | Japonica |           | Os03g0818800 | OsR498G0307281900.01.T01 | Floral homeotic protein APETALA 2                                                |
| maker-3-augustus-gene-482.48-mRNA-1 | Japonica | NA       |           | Os03g0819100 | OsR498G0307282900.01.T01 | Leukotriene A-4 hydrolase                                                        |
| maker-3-augustus-gene-482.51-mRNA-1 | Japonica | NA       |           | Os03g0819300 | OsR498G0307283100.01.T01 | Glycine-rich protein A3                                                          |
| maker-3-augustus-gene-482.53-mRNA-1 | Japonica | NA       |           |              |                          | RAB GTPase homolog 8A                                                            |
| maker-3-augustus-gene-482.61-mRNA-1 | Japonica | NA       |           | Os03g0820500 | OsR498G0307286300.01.T01 | Actin-depolymerizing factor                                                      |
| maker-3-augustus-gene-482.64-mRNA-1 | Japonica | NA       |           | Os03g0821100 | OsR498G0307287500.01.T01 | Non-cell-autonomous heat shock cognate protein 70                                |
| maker-3-augustus-gene-482.66-mRNA-1 | Japonica | NA       |           |              | OsR498G0307281400.01.T01 |                                                                                  |
| maker-3-augustus-gene-482.67-mRNA-1 | Japonica | NA       |           | Os03g0819400 | OsR498G0307283400.01.T01 | Protein SODIUM POTASSIUM ROOT DEFECTIVE 2 like                                   |
| maker-3-augustus-gene-482.70-mRNA-1 | Japonica | NA       |           |              |                          | Peptidase A1 domain-containing protein                                           |
| maker-3-augustus-gene-482.71-mRNA-1 | Japonica | NA       |           | Os03g0819600 | OsR498G0307284200.01.T01 | Chalcone--flavonone isomerase                                                    |
| maker-3-augustus-gene-482.75-mRNA-1 | Japonica | NA       |           | Os03g0819700 | OsR498G0307284400.01.T01 | DUF4378 domain-containing protein (Fragment)                                     |
| maker-3-augustus-gene-482.78-mRNA-1 | Japonica | NA       |           | Os03g0820700 | OsR498G0307286800.01.T01 | Serine/arginine-rich splicing factor 7 (Fragment)                                |
| maker-3-augustus-gene-482.82-mRNA-1 | Japonica | NA       |           | Os03g0820900 | OsR498G0307287200.01.T02 | SEC14 cytosolic factor family protein / phosphoglyceride transfer family protein |
| maker-3-augustus-gene-483.0-mRNA-1  | Japonica | NA       |           | Os03g0821200 | OsR498G0307287900.01.T01 | Dof-type domain-containing protein                                               |
| maker-3-augustus-gene-483.10-mRNA-1 | Japonica | NA       |           | Os03g0822300 | OsR498G0307294300.01.T03 | Ribosomal RNA methyltransferase FtsJ domain                                      |
| maker-3-augustus-gene-483.14-mRNA-1 | Japonica | NA       |           | Os03g0822700 | OsR498G0307294700.01.T01 | TOG domain-containing protein (Fragment)                                         |
| maker-3-augustus-gene-483.18-mRNA-1 | Japonica | Indica   |           | Os03g0822800 | OsR498G0307294900.01.T01 | DnaJ subfamily A member 3                                                        |
| maker-3-augustus-gene-483.23-mRNA-1 | Japonica | NA       |           | Os03g0821300 | OsR498G0307290000.01.T01 | PPM-type phosphatase domain-containing protein                                   |
| maker-3-augustus-gene-483.27-mRNA-1 | Japonica | Indica   |           | Os03g0821800 | OsR498G0307292200.01.T02 | Dolichyl-phosphate beta-glucosyltransferase                                      |
| maker-3-augustus-gene-483.33-mRNA-1 | Japonica | NA       |           | Os03g0822000 | OsR498G0307292800.01.T01 | Expansin                                                                         |
| maker-3-augustus-gene-483.36-mRNA-1 | Japonica | NA       |           | Os03g0822200 | OsR498G0307294200.01.T01 | Sanguinarine reductase                                                           |
| maker-3-augustus-gene-483.7-mRNA-1  | Japonica | NA       |           | Os07g0624100 |                          | BED zinc finger family protein, expressed                                        |
| maker-3-augustus-gene-484.43-mRNA-1 | Japonica | NA       |           | Os03g0824200 | OsR498G0307298700.01.T01 | HemK methyltransferase family member 2                                           |
| maker-3-augustus-gene-484.45-mRNA-1 | Japonica | Indica   |           | Os03g0824300 | OsR498G0307299100.01.T03 | RNA-binding protein 28                                                           |
| maker-3-augustus-gene-484.52-mRNA-1 | Japonica | NA       |           | Os03g0824400 | OsR498G0307299300.01.T02 | Dolichol-phosphate mannosyltransferase subunit 1                                 |
| maker-3-augustus-gene-484.56-mRNA-1 | Japonica | Indica   |           | Os03g0823200 | OsR498G0307295800.01.T03 | D-xylose-proton symporter-like 3 chloroplastic                                   |
| maker-3-augustus-gene-484.62-mRNA-1 | Japonica | NA       |           | Os03g0823500 | OsR498G0307296800.01.T01 | Nitrate transporter 1/peptide transporter family protein                         |
| maker-3-augustus-gene-484.68-mRNA-1 | Japonica | NA       |           |              |                          | nucleobase-ascorbate transporter 7                                               |
| maker-3-augustus-gene-484.75-mRNA-1 | Japonica | Japonica |           | Os03g0823900 | OsR498G0306282100.01.T02 | Calmodulin-binding protein, putative, expressed                                  |
| maker-3-augustus-gene-484.79-mRNA-1 | Japonica | Indica   |           | Os03g0824100 | OsR498G0307298600.01.T01 | Smr domain-containing protein (Fragment)                                         |
| maker-3-augustus-gene-484.83-mRNA-1 | Japonica | NA       |           | Os03g0824350 | OsR498G0100977700.01.T05 | NnrU domain-containing protein                                                   |
| maker-3-augustus-gene-484.85-mRNA-1 | Japonica | NA       |           |              | OsR498G0307300000.01.T01 |                                                                                  |
| maker-3-augustus-gene-485.0-mRNA-1  | Japonica | Indica   | Kinase-TM | Os03g0825300 | OsR498G0307301100.01.T01 | Putative serine/threonine-protein kinase BSK3                                    |
| maker-3-augustus-gene-485.11-mRNA-1 | Japonica | NA       |           | Os03g0826400 | OsR498G0307305100.01.T01 | Zinc finger CCH domain-containing protein 25                                     |
| maker-3-augustus-gene-485.15-mRNA-1 | Japonica | Indica   |           | Os03g0826600 | OsR498G0307305700.01.T01 | Phospholipase C-type enzymes                                                     |
| maker-3-augustus-gene-485.17-mRNA-1 | Japonica | NA       |           | Os03g0825400 | OsR498G0307301400.01.T01 | Mitochondrial import inner membrane translocase                                  |
| maker-3-augustus-gene-485.21-mRNA-1 | Japonica | NA       | Kinase    | Os03g0825800 | OsR498G0307302800.01.T02 | Receptor-like protein kinase ANXUR2                                              |
| maker-3-augustus-gene-485.23-mRNA-1 | Japonica | NA       |           | Os03g0826000 | OsR498G0307304400.01.T03 | Phosphatidylinositol N-acetylglucosaminyltransferase subunit P-related           |
| maker-3-augustus-gene-485.25-mRNA-1 | Japonica | NA       |           |              | OsR498G0307305000.01.T01 | GONST2 Golgi Nucleotide sugar transporter                                        |
| maker-3-augustus-gene-485.31-mRNA-1 | Japonica | Indica   |           | Os03g0826700 | OsR498G0307306000.01.T01 | S-adenosyl-L-methionine-dependent methyltransferases superfamily protein         |
| maker-3-augustus-gene-485.35-mRNA-1 | Japonica | NA       |           | Os03g0826800 | OsR498G0307306200.01.T01 | Isoflavone reductase-like protein-like                                           |
| maker-3-augustus-gene-485.38-mRNA-1 | Japonica | Indica   |           | Os03g0826900 | OsR498G0307306400.01.T01 |                                                                                  |
| maker-3-augustus-gene-485.4-mRNA-1  | Japonica | NA       |           | Os03g0825500 | OsR498G0307301500.01.T02 | KOW motif family protein, expressed                                              |
| maker-3-augustus-gene-485.6-mRNA-1  | Japonica | NA       |           | Os03g0825700 | OsR498G0307302500.01.T02 | Defective in exine formation                                                     |
| maker-3-augustus-gene-486.44-mRNA-1 | Japonica | Indica   |           | Os03g0827500 | OsR498G0307307900.01.T02 | SPX domain-containing protein 4                                                  |
| maker-3-augustus-gene-486.48-mRNA-1 | Japonica | NA       |           | Os03g0827700 | OsR498G0307308700.01.T02 | DEAD-box ATP-dependent RNA helicase 3, chloroplastic                             |
| maker-3-augustus-gene-486.52-mRNA-1 | Japonica | NA       |           | Os03g0828100 | OsR498G0307311600.01.T01 | Large subunit ribosomal protein L18                                              |



|                                     |          |          |              |              |                          |                                                                                       |
|-------------------------------------|----------|----------|--------------|--------------|--------------------------|---------------------------------------------------------------------------------------|
| maker-3-augustus-gene-486.54-mRNA-1 | Japonica | Indica   |              | Os03g0828500 | OsR498G0307311400.01.T01 | Mannan endo-1,4-beta-mannosidase                                                      |
| maker-3-augustus-gene-486.56-mRNA-1 | Japonica | Japonica |              | Os03g0828500 | OsR498G0307311000.01.T01 | Mannan endo-1,4-beta-mannosidase                                                      |
| maker-3-augustus-gene-486.58-mRNA-1 | Japonica | NA       |              | Os03g0828600 | OsR498G0307310800.01.T01 | Cation/H(+) antiporter 19                                                             |
| maker-3-augustus-gene-486.60-mRNA-1 | Japonica | NA       |              |              | OsR498G0307308200.01.T01 | Transmembrane protein like                                                            |
| maker-3-augustus-gene-486.65-mRNA-1 | Japonica | NA       |              |              | OsR498G0307311800.01.T04 | Acylpyruvase FAHD1, mitochondrial                                                     |
| maker-3-augustus-gene-486.70-mRNA-1 | Japonica | NA       |              | Os03g0829100 | OsR498G0307312000.01.T01 | AB hydrolase-1 domain-containing protein (Fragment)                                   |
| maker-3-augustus-gene-486.72-mRNA-1 | Japonica | NA       |              | Os03g0829200 | OsR498G0307312200.01.T01 | AB hydrolase-1 domain-containing protein (Fragment)                                   |
| maker-3-augustus-gene-487.0-mRNA-1  | Japonica | NA       |              |              | OsR498G0307315300.01.T01 | J domain-containing protein (Fragment)                                                |
| maker-3-augustus-gene-487.14-mRNA-1 | Japonica | Indica   |              | Os03g0829800 | OsR498G0307313000.01.T01 | Cell number regulator 2                                                               |
| maker-3-augustus-gene-487.16-mRNA-1 | Japonica | NA       |              | Os03g0830200 | OsR498G0307313600.01.T01 | Cell number regulator 7                                                               |
| maker-3-augustus-gene-487.18-mRNA-1 | Japonica | Indica   |              | Os03g0830401 | OsR498G0307313800.01.T01 | Cell number regulator 7                                                               |
| maker-3-augustus-gene-487.2-mRNA-1  | Japonica | NA       |              | Os03g0831200 | OsR498G0307315700.01.T01 | GATA-type domain-containing protein                                                   |
| maker-3-augustus-gene-487.20-mRNA-1 | Japonica | NA       |              | Os03g0830500 | OsR498G0307314400.01.T01 | Cell number regulator 2                                                               |
| maker-3-augustus-gene-487.22-mRNA-1 | Japonica | NA       |              |              |                          | PMEI domain-containing protein                                                        |
| maker-3-augustus-gene-487.23-mRNA-1 | Japonica | NA       |              | Os03g0830900 | OsR498G0307315200.01.T01 | Mono-/di-acylglycerol lipase N-terminal                                               |
| maker-3-augustus-gene-487.28-mRNA-1 | Japonica | NA       |              | Os03g0831100 | OsR498G0307315600.01.T02 | Pumilio homology domain family member 6                                               |
| maker-3-augustus-gene-489.65-mRNA-1 | Japonica | NA       |              | Os03g0128700 | OsR498G0305164700.01.T04 |                                                                                       |
| maker-3-augustus-gene-49.38-mRNA-1  | Japonica | NA       |              | Os03g0197100 | OsR498G0305395700.01.T01 | Polyol transporter protein 4                                                          |
| maker-3-augustus-gene-49.40-mRNA-1  | Japonica | NA       |              | Os03g0197300 | OsR498G0305397500.01.T01 | Vicilin-like seed storage protein                                                     |
| maker-3-augustus-gene-49.42-mRNA-1  | Japonica | NA       |              | Os03g0198300 | OsR498G0305402100.01.T04 | J domain-containing protein required for chloroplast accumulation response            |
| maker-3-augustus-gene-49.47-mRNA-1  | Japonica | NA       |              | Os03g0198400 | OsR498G0305402300.01.T03 | Seryl-tRNA synthetase                                                                 |
| maker-3-augustus-gene-49.54-mRNA-1  | Japonica | NA       |              | Os03g0198500 | OsR498G0305402700.01.T01 | DUF862 domain-containing protein                                                      |
| maker-3-augustus-gene-49.57-mRNA-1  | Japonica | Indica   |              | Os03g0196900 | OsR498G0305394400.01.T01 | Plant-specific TFIIB-related protein 1                                                |
| maker-3-augustus-gene-49.61-mRNA-1  | Japonica | NA       |              | Os03g0197000 | OsR498G0305394600.01.T05 | Di-trans, poly(cis)-poly(prenyl) diphosphate synthase ((2E,6E)-farnesyl)diphosphatase |
| maker-3-augustus-gene-49.66-mRNA-1  | Japonica | NA       |              | Os03g0197400 | OsR498G0305398000.01.T01 | COP9 signalosome complex subunit 4                                                    |
| maker-3-augustus-gene-49.71-mRNA-1  | Japonica | NA       |              | Os03g0197900 | OsR498G0305401000.01.T01 | Transcription repressor                                                               |
| maker-3-augustus-gene-49.72-mRNA-1  | Japonica | NA       |              | Os03g0198600 | OsR498G0305403200.01.T01 | Homeodomain leucine zipper protein class 1                                            |
| maker-3-augustus-gene-490.43-mRNA-1 | Japonica | Indica   |              | Os03g0836800 | OsR498G0307335100.01.T02 | IAA-amino acid hydrolase ILR1-like protein 8                                          |
| maker-3-augustus-gene-490.46-mRNA-1 | Japonica | NA       |              | Os03g0836900 | OsR498G0307335500.01.T01 | IAA-amino acid hydrolase ILR1                                                         |
| maker-3-augustus-gene-490.48-mRNA-1 | Japonica | NA       |              | Os03g0837100 | OsR498G0307336500.01.T03 | Cellulose synthase                                                                    |
| maker-3-augustus-gene-490.56-mRNA-1 | Japonica | NA       |              | Os03g0837300 | OsR498G0307337900.01.T01 | Nicotinate phosphoribosyltransferase                                                  |
| maker-3-augustus-gene-490.62-mRNA-1 | Japonica | NA       |              |              |                          | Coenzyme Q-binding protein COQ10, START domain containing protein (Fragment)          |
| maker-3-augustus-gene-490.65-mRNA-1 | Japonica | Indica   |              | Os03g0838400 | OsR498G0307339700.01.T01 | Ammonium transporter                                                                  |
| maker-3-augustus-gene-490.67-mRNA-1 | Japonica | NA       |              | Os03g0838500 | OsR498G0307339900.01.T01 | Inhibitor 19 domain-containing protein                                                |
| maker-3-augustus-gene-490.69-mRNA-1 | Japonica | NA       |              | Os03g0837000 | OsR498G0307335800.01.T02 |                                                                                       |
| maker-3-augustus-gene-490.75-mRNA-1 | Japonica | NA       |              |              | OsR498G0307337800.01.T01 | Myb-like DNA-binding domain containing protein                                        |
| maker-3-augustus-gene-490.77-mRNA-1 | Japonica | Indica   |              | Os03g0837800 | OsR498G0307338600.01.T02 | Transmembrane and coiled-coil domain-containing protein 5B                            |
| maker-3-augustus-gene-491.0-mRNA-1  | Japonica | NA       |              |              | OsR498G0307341100.01.T01 | Protein DETOXIFICATION                                                                |
| maker-3-augustus-gene-491.12-mRNA-1 | Japonica | NA       |              | Os03g0839100 | OsR498G0307341000.01.T01 | Ubiquinone biosynthesis monooxygenase COQ6, mitochondrial                             |
| maker-3-augustus-gene-491.2-mRNA-1  | Japonica | NA       |              |              | OsR498G0307342100.01.T01 |                                                                                       |
| maker-3-augustus-gene-491.22-mRNA-1 | Japonica | NA       | Kinase-TM    | Os03g0839900 | OsR498G0307344800.01.T01 | Protein kinase protein with adenine nucleotide alpha hydrolase-like domain            |
| maker-3-augustus-gene-491.5-mRNA-1  | Japonica | NA       |              | Os03g0838900 | OsR498G0307340800.01.T02 | Transcription termination factor like                                                 |
| maker-3-augustus-gene-491.7-mRNA-1  | Japonica | NA       |              | Os03g0839000 | OsR498G0307340800.01.T04 | E3 ubiquitin-protein ligase RNF170                                                    |
| maker-3-augustus-gene-492.0-mRNA-1  | Japonica | NA       |              |              | OsR498G0307349700.01.T01 |                                                                                       |
| maker-3-augustus-gene-492.16-mRNA-1 | Japonica | NA       |              |              | OsR498G0307352700.01.T05 | RNA-binding protein containing a PIN domain                                           |
| maker-3-augustus-gene-492.2-mRNA-1  | Japonica | NA       |              |              | OsR498G0307350100.01.T01 | Calcium-dependent protein kinase 6, putative                                          |
| maker-3-augustus-gene-492.21-mRNA-1 | Japonica | NA       |              | Os03g0843400 | OsR498G0307353300.01.T01 | 30S ribosomal protein S6 alpha chloroplastic                                          |
| maker-3-augustus-gene-492.24-mRNA-1 | Japonica | NA       |              | Os03g0840400 | OsR498G0307346800.01.T01 | SANT domain-containing protein                                                        |
| maker-3-augustus-gene-492.37-mRNA-1 | Japonica | Indica   |              | Os03g0840800 | OsR498G0307347800.01.T01 | Phospholipase D                                                                       |
| maker-3-augustus-gene-492.41-mRNA-1 | Japonica | NA       | CC-Kinase-TM | Os03g0841100 | OsR498G0307348200.01.T01 | Wall-associated receptor kinase 3                                                     |
| maker-3-augustus-gene-492.45-mRNA-1 | Japonica | NA       |              | Os03g0841700 | OsR498G0307348600.01.T01 | Prohibitin                                                                            |
| maker-3-augustus-gene-492.48-mRNA-1 | Japonica | NA       | Kinase       | Os03g0841800 | OsR498G0307348800.01.T01 | Non-specific serine/threonine protein kinase                                          |
| maker-3-augustus-gene-492.50-mRNA-1 | Japonica | Japonica |              | Os03g0841900 | OsR498G0307349200.01.T04 | Prolycopene isomerase chloroplastic                                                   |
| maker-3-augustus-gene-493.1-mRNA-1  | Japonica | NA       |              | Os03g0843600 | OsR498G0307353700.01.T04 | Ion channel CASTOR                                                                    |
| maker-3-augustus-gene-493.15-mRNA-1 | Japonica | Indica   |              | Os08g0116800 | OsR498G0307356100.01.T02 | Exosome complex component                                                             |
| maker-3-augustus-gene-493.19-mRNA-1 | Japonica | NA       |              | Os03g0844500 | OsR498G0307356300.01.T02 | Serine/threonine protein phosphatase 2A regulatory subunit                            |
| maker-3-augustus-gene-493.21-mRNA-1 | Japonica | NA       |              |              | OsR498G0307356900.01.T01 | ALBINO3-like protein 1, chloroplastic isoform A                                       |
| maker-3-augustus-gene-493.31-mRNA-1 | Japonica | NA       |              |              | OsR498G0307353600.01.T09 | RNA-binding protein Luc7-like 2                                                       |
| maker-3-augustus-gene-493.45-mRNA-1 | Japonica | NA       |              | Os03g0844600 | OsR498G0307356600.01.T01 | Gdsl esteraselipase                                                                   |
| maker-3-augustus-gene-493.53-mRNA-1 | Japonica | Indica   |              | Os03g0845000 | OsR498G0307357800.01.T03 | 30S ribosomal protein S1 isoform X1                                                   |
| maker-3-augustus-gene-493.7-mRNA-1  | Japonica | NA       |              |              | OsR498G0307354300.01.T02 | Thiol methyltransferase                                                               |

|                                     |          |          |           |              |                          |                                                                               |
|-------------------------------------|----------|----------|-----------|--------------|--------------------------|-------------------------------------------------------------------------------|
| maker-3-augustus-gene-494.24-mRNA-1 | Japonica | NA       |           | Os03g0846400 | OsR498G0307362100.01.T03 | Putative polyprotein from transposon TNT                                      |
| maker-3-augustus-gene-494.29-mRNA-1 | Japonica | NA       |           | Os04g0668900 | OsR498G0409459400.01.T06 | Ubiquinol oxidase                                                             |
| maker-3-augustus-gene-494.32-mRNA-1 | Japonica | NA       | Kinase-TM | Os03g0847600 | OsR498G0307365500.01.T05 | Serine/threonine protein kinase                                               |
| maker-3-augustus-gene-494.37-mRNA-1 | Japonica | NA       |           | Os03g0845500 | OsR498G0307359200.01.T04 | Acyl-activating enzyme 16                                                     |
| maker-3-augustus-gene-494.44-mRNA-1 | Japonica | Indica   |           | Os03g0845700 | OsR498G0307360000.01.T03 | Nucleic acid-binding, OB-fold (Fragment)                                      |
| maker-3-augustus-gene-494.47-mRNA-1 | Japonica | NA       |           | Os03g0846900 |                          |                                                                               |
| maker-3-augustus-gene-495.0-mRNA-1  | Japonica | NA       |           |              | OsR498G0307366100.01.T02 | Ankyrin repeat domain-containing protein 11-like                              |
| maker-3-augustus-gene-495.13-mRNA-1 | Japonica | NA       |           | Os03g0848100 | OsR498G0307367000.01.T04 | Ser/Thr protein phosphatase family protein, expressed                         |
| maker-3-augustus-gene-495.15-mRNA-1 | Japonica | NA       |           | Os03g0848200 | OsR498G0307367200.01.T01 | Purple acid phosphatase                                                       |
| maker-3-augustus-gene-495.17-mRNA-1 | Japonica | NA       |           | Os03g0848400 | OsR498G0307367600.01.T03 | Endoplasmic reticulum transmembrane protein (Fragment)                        |
| maker-3-augustus-gene-495.19-mRNA-1 | Japonica | Japonica | CC-NBS-TM | Os03g0848700 | OsR498G0307368000.01.T01 | Powdery mildew resistance protein PM3 variant                                 |
| maker-3-augustus-gene-495.28-mRNA-1 | Japonica | Japonica |           | Os03g0849600 | OsR498G0307368400.01.T01 | Component of oligomeric Golgi complex 2                                       |
| maker-3-augustus-gene-495.3-mRNA-1  | Japonica | NA       |           |              | OsR498G0307366700.01.T01 | ROP-interactive CRIB motif-containing protein 4                               |
| maker-3-augustus-gene-495.5-mRNA-1  | Japonica | NA       |           | Os03g0848300 | OsR498G0307367300.01.T01 | Actin-related protein 2/3 complex subunit 4                                   |
| maker-3-augustus-gene-495.9-mRNA-1  | Japonica | NA       |           | Os03g0848600 | OsR498G0307367700.01.T04 | AvrRpt-cleavage domain-containing protein (Fragment)                          |
| maker-3-augustus-gene-496.42-mRNA-1 | Japonica | Japonica |           | Os03g0849700 | OsR498G0307368500.01.T03 | Sec16 domain-containing protein                                               |
| maker-3-augustus-gene-496.44-mRNA-1 | Japonica | Indica   |           | Os03g0849800 | OsR498G0307369100.01.T03 | Nucleotide-diphospho-sugar transferase family protein                         |
| maker-3-augustus-gene-496.48-mRNA-1 | Japonica | NA       |           | Os03g0850200 | OsR498G0307370500.01.T01 | 4-hydroxyphenylacetaldehyde oxime monooxygenase                               |
| maker-3-augustus-gene-496.50-mRNA-1 | Japonica | Indica   |           | Os03g0850400 | OsR498G0307371900.01.T01 | Aspartate kinase                                                              |
| maker-3-augustus-gene-496.60-mRNA-1 | Japonica | Indica   |           | Os03g0851400 | OsR498G0307375500.01.T02 |                                                                               |
| maker-3-augustus-gene-496.63-mRNA-1 | Japonica | NA       |           | Os03g0850000 | OsR498G0307370200.01.T01 | Carbonyl reductase (NADPH) 2                                                  |
| maker-3-augustus-gene-496.65-mRNA-1 | Japonica | NA       |           | Os03g0850100 | OsR498G0307370400.01.T02 | FCP1 homology domain-containing protein (Fragment)                            |
| maker-3-augustus-gene-496.68-mRNA-1 | Japonica | NA       |           | Os03g0850600 | OsR498G0307373000.01.T01 | Perilipin-3                                                                   |
| maker-3-augustus-gene-496.73-mRNA-1 | Japonica | NA       |           | Os03g0850800 | OsR498G0307373800.01.T01 | Transferring glycosyl group transferase                                       |
| maker-3-augustus-gene-497.38-mRNA-1 | Japonica | NA       |           | Os03g0851500 | OsR498G0307375500.01.T05 | DNA repair RAD52-like protein 2, chloroplastic                                |
| maker-3-augustus-gene-497.40-mRNA-1 | Japonica | Indica   |           | Os03g0851600 | OsR498G0307375700.01.T02 | U5 small nuclear ribonucleoprotein 40 kDa protein isoform X1                  |
| maker-3-augustus-gene-497.45-mRNA-1 | Japonica | NA       |           | Os03g0851700 | OsR498G0307375900.01.T01 | Ankyrin repeat domain-containing protein 2                                    |
| maker-3-augustus-gene-497.47-mRNA-1 | Japonica | NA       |           | Os03g0851800 | OsR498G0307376100.01.T01 | Pantoate--beta-alanine ligase                                                 |
| maker-3-augustus-gene-497.49-mRNA-1 | Japonica | NA       |           | Os03g0852300 | OsR498G0307377100.01.T04 | Histone-like transcription factor and archaeal histone family protein, expres |
| maker-3-augustus-gene-497.51-mRNA-1 | Japonica | NA       |           | Os03g0852600 | OsR498G0307377700.01.T01 |                                                                               |
| maker-3-augustus-gene-497.53-mRNA-1 | Japonica | NA       |           |              | OsR498G0307379100.01.T01 | Tetraspanin-3                                                                 |
| maker-3-augustus-gene-497.55-mRNA-1 | Japonica | NA       |           | Os03g0853200 | OsR498G0307379500.01.T01 | Tetraspanin/Peripherin                                                        |
| maker-3-augustus-gene-497.57-mRNA-1 | Japonica | NA       |           | Os03g0851900 | OsR498G0307376600.01.T05 | lactation elevated protein 1 isoform X3                                       |
| maker-3-augustus-gene-497.62-mRNA-1 | Japonica | NA       |           | Os03g0852000 | OsR498G0307376600.01.T07 | Transcription factor bHLH25-like                                              |
| maker-3-augustus-gene-497.64-mRNA-1 | Japonica | NA       |           | Os03g0852200 | OsR498G0307377000.01.T01 | Derlin                                                                        |
| maker-3-augustus-gene-497.68-mRNA-1 | Japonica | NA       |           | Os03g0852500 | OsR498G0307377600.01.T01 |                                                                               |
| maker-3-augustus-gene-497.70-mRNA-1 | Japonica | NA       |           | Os03g0852900 | OsR498G0307378800.01.T01 | Cleavage and polyadenylation specificity factor                               |
| maker-3-augustus-gene-498.31-mRNA-1 | Japonica | Indica   |           | Os03g0853500 | OsR498G0307381100.01.T01 | Brevis radix (BRX) domain                                                     |
| maker-3-augustus-gene-498.36-mRNA-1 | Japonica | NA       |           | Os03g0854300 | OsR498G0307383300.01.T02 | RNA-binding protein 34                                                        |
| maker-3-augustus-gene-498.39-mRNA-1 | Japonica | NA       |           | Os03g0854500 | OsR498G0307383900.01.T04 | Heat shock transcription factor                                               |
| maker-3-augustus-gene-498.41-mRNA-1 | Japonica | Indica   |           | Os03g0853600 | OsR498G0307381600.01.T02 | Ribonuclease P protein subunit P38-related                                    |
| maker-3-augustus-gene-498.44-mRNA-1 | Japonica | NA       |           | Os03g0853900 | OsR498G0307382600.01.T02 | Sinigrinase                                                                   |
| maker-3-augustus-gene-498.48-mRNA-1 | Japonica | NA       |           | Os03g0854100 | OsR498G0307383000.01.T04 | probable ADP-ribosylation factor GTPase-activating protein AGD8               |
| maker-3-augustus-gene-498.53-mRNA-1 | Japonica | NA       |           | Os03g0854200 | OsR498G0307383200.01.T02 | Exosome complex exonuclease RRP46 like                                        |
| maker-3-augustus-gene-498.57-mRNA-1 | Japonica | NA       |           | Os03g0854600 | OsR498G0307384200.01.T01 | Xyloglucan endotransglucosylase/hydrolase                                     |
| maker-3-augustus-gene-498.59-mRNA-1 | Japonica | Indica   |           | Os03g0854800 | OsR498G0307385000.01.T05 | PARP catalytic domain-containing protein                                      |
| maker-3-augustus-gene-499.0-mRNA-1  | Japonica | NA       |           | Os03g0855100 | OsR498G0307385900.01.T01 | WRKY transcription factor 14                                                  |
| maker-3-augustus-gene-499.10-mRNA-1 | Japonica | NA       |           |              | OsR498G0307391700.01.T05 | Coatomer subunit zeta                                                         |
| maker-3-augustus-gene-499.13-mRNA-1 | Japonica | NA       |           |              | OsR498G0307391700.01.T02 | ATP-dependent DNA helicase 2 subunit KU80                                     |
| maker-3-augustus-gene-5.0-mRNA-1    | Japonica | NA       |           |              | OsR498G0305108900.01.T01 | RDR2-independent DNA methylation protein                                      |
| maker-3-augustus-gene-5.11-mRNA-1   | Japonica | NA       |           | Os03g0113800 | OsR498G0305113100.01.T01 | Hop-interacting protein TH1002                                                |
| maker-3-augustus-gene-5.17-mRNA-1   | Japonica | NA       |           |              | OsR498G0305113900.01.T01 | Kinesin-like protein KIN-14E                                                  |
| maker-3-augustus-gene-5.29-mRNA-1   | Japonica | NA       |           | Os03g0112800 | OsR498G0305109200.01.T01 | Putative DUF26 domain receptor-like protein kinase                            |
| maker-3-augustus-gene-5.35-mRNA-1   | Japonica | NA       |           | Os03g0112900 | OsR498G0305109400.01.T01 | Ferulic acid 5-hydroxylase                                                    |
| maker-3-augustus-gene-5.37-mRNA-1   | Japonica | NA       | Kinase-TM | Os03g0113000 | OsR498G0305110000.01.T01 | Receptor protein kinase CRINKLY4                                              |
| maker-3-augustus-gene-5.39-mRNA-1   | Japonica | NA       |           |              | OsR498G0305111400.01.T01 | Trihelix transcription factor GT-2                                            |
| maker-3-augustus-gene-5.41-mRNA-1   | Japonica | NA       |           |              | OsR498G0305112400.01.T01 |                                                                               |
| maker-3-augustus-gene-5.43-mRNA-1   | Japonica | NA       |           | Os03g0113700 | OsR498G0305113000.01.T01 | Heat shock 70 kDa protein, mitochondrial                                      |
| maker-3-augustus-gene-5.7-mRNA-1    | Japonica | NA       |           | Os03g0113100 | OsR498G0305110300.01.T01 | Thymidine kinase                                                              |
| maker-3-augustus-gene-5.9-mRNA-1    | Japonica | NA       |           | Os03g0113200 | OsR498G0305110500.01.T02 | F-box domain containing protein-like                                          |
| maker-3-augustus-gene-50.33-mRNA-1  | Japonica | Indica   |           | Os12g0511300 | OsR498G0305405300.01.T02 | CRT-like domain-containing protein (Fragment)                                 |

|                                     |          |          |        |              |                          |                                                                |
|-------------------------------------|----------|----------|--------|--------------|--------------------------|----------------------------------------------------------------|
| maker-3-augustus-gene-50.38-mRNA-1  | Japonica | Indica   |        | Os12g0511200 | OsR498G0305408900.01.T01 | Heptahelical transmembrane protein 5                           |
| maker-3-augustus-gene-50.40-mRNA-1  | Japonica | NA       |        |              |                          |                                                                |
| maker-3-augustus-gene-50.42-mRNA-1  | Japonica | NA       |        | Os03g0200200 | OsR498G0305409500.01.T02 | TRIO and F-actin-binding protein                               |
| maker-3-augustus-gene-50.44-mRNA-1  | Japonica | Indica   |        | Os03g0200400 | OsR498G0305410100.01.T01 | CYSTM domain-containing protein                                |
| maker-3-augustus-gene-50.47-mRNA-1  | Japonica | NA       |        | Os03g0200500 | OsR498G0305410500.01.T01 |                                                                |
| maker-3-augustus-gene-50.51-mRNA-1  | Japonica | NA       |        | Os03g0198900 | OsR498G0305405200.01.T02 | 26S proteasome non-ATPase regulatory subunit 9-like            |
| maker-3-augustus-gene-50.53-mRNA-1  | Japonica | NA       |        |              | OsR498G0305405200.01.T07 | Methyltransferase-like protein 2 isoform A                     |
| maker-3-augustus-gene-50.56-mRNA-1  | Japonica | Indica   |        | Os03g0199500 | OsR498G0305407200.01.T01 | zf-RVT domain-containing protein                               |
| maker-3-augustus-gene-50.59-mRNA-1  | Japonica | NA       |        |              | OsR498G0305410800.01.T03 | No pollen germination related 1                                |
| maker-3-augustus-gene-500.37-mRNA-1 | Japonica | NA       |        | Os03g0858400 | OsR498G0307398100.01.T01 | Transducin beta-like protein 2-like                            |
| maker-3-augustus-gene-500.41-mRNA-1 | Japonica | Indica   |        | Os03g0857400 | OsR498G0307396400.01.T02 | PGR5-like protein 1B chloroplastic                             |
| maker-3-augustus-gene-500.45-mRNA-1 | Japonica | NA       |        | Os03g0857500 | OsR498G0307396600.01.T02 | SASA domain-containing protein (Fragment)                      |
| maker-3-augustus-gene-500.49-mRNA-1 | Japonica | NA       |        | Os03g0858100 | OsR498G0307397600.01.T03 | Importin N-terminal domain-containing protein (Fragment)       |
| maker-3-augustus-gene-501.46-mRNA-1 | Japonica | NA       |        | Os03g0859900 | OsR498G0307400900.01.T01 | DUF547 domain-containing protein                               |
| maker-3-augustus-gene-501.52-mRNA-1 | Japonica | NA       |        |              | OsR498G0307401100.01.T04 | ASCH domain-containing protein                                 |
| maker-3-augustus-gene-501.56-mRNA-1 | Japonica | NA       |        | Os03g0858700 |                          | ATP-dependent DNA helicase 2 subunit KU80-like                 |
| maker-3-augustus-gene-501.58-mRNA-1 | Japonica | NA       |        | Os03g0859100 | OsR498G0307399600.01.T01 | GDSL esterase/lipase EXL3                                      |
| maker-3-augustus-gene-501.60-mRNA-1 | Japonica | NA       |        | Os03g0859300 | OsR498G0307400000.01.T01 | La domain containing protein, expressed                        |
| maker-3-augustus-gene-501.63-mRNA-1 | Japonica | NA       |        | Os03g0859500 | OsR498G0307400200.01.T01 | ABC-2 type transporter family protein isoform 1                |
| maker-3-augustus-gene-501.67-mRNA-1 | Japonica | Indica   |        | Os12g0277500 | OsR498G0307400200.01.T05 | RuBisCO large subunit-binding protein subunit alpha            |
| maker-3-augustus-gene-501.72-mRNA-1 | Japonica | Indica   |        | Os03g0859800 | OsR498G0307400600.01.T02 | OTU-like cysteine protease family protein, putative, expressed |
| maker-3-augustus-gene-502.58-mRNA-1 | Japonica | NA       |        |              | OsR498G0307404300.01.T04 | Transcriptional corepressor LEUNIG                             |
| maker-3-augustus-gene-502.65-mRNA-1 | Japonica | Japonica |        | Os03g0861100 | OsR498G0307404700.01.T03 |                                                                |
| maker-3-augustus-gene-502.73-mRNA-1 | Japonica | NA       |        | Os03g0862100 | OsR498G0307406700.01.T03 | SLH domain-containing protein                                  |
| maker-3-augustus-gene-502.81-mRNA-1 | Japonica | NA       |        | Os03g0861400 | OsR498G0307405400.01.T02 | Heavy metal-associated domain containing protein, expressed    |
| maker-3-augustus-gene-502.91-mRNA-1 | Japonica | NA       |        | Os03g0862200 | OsR498G0713369200.01.T01 | Kinesin motor domain-containing protein                        |
| maker-3-augustus-gene-51.0-mRNA-1   | Japonica | NA       |        | Os03g0201000 | OsR498G0305411500.01.T01 |                                                                |
| maker-3-augustus-gene-51.12-mRNA-1  | Japonica | NA       |        | Os03g0202500 | OsR498G0305415900.01.T02 | FBD domain-containing protein                                  |
| maker-3-augustus-gene-51.16-mRNA-1  | Japonica | NA       |        | Os03g0200700 | OsR498G0305411000.01.T01 |                                                                |
| maker-3-augustus-gene-51.2-mRNA-1   | Japonica | NA       |        | Os03g0201200 | OsR498G0305411900.01.T01 | Anti-sigma-I factor RsgI6                                      |
| maker-3-augustus-gene-51.22-mRNA-1  | Japonica | Indica   |        | Os03g0200800 | OsR498G0305411200.01.T01 | ADP-ribosylation factor-like protein 8a                        |
| maker-3-augustus-gene-51.25-mRNA-1  | Japonica | Indica   |        | Os03g0201100 | OsR498G0305411800.01.T04 | Peptidylprolyl isomerase                                       |
| maker-3-augustus-gene-51.33-mRNA-1  | Japonica | Indica   |        | Os03g0201600 | OsR498G0305413000.01.T03 | YrdC domain-containing protein, mitochondrial                  |
| maker-3-augustus-gene-51.36-mRNA-1  | Japonica | NA       |        | Os03g0201800 | OsR498G0305413400.01.T01 | GH10 domain-containing protein (Fragment)                      |
| maker-3-augustus-gene-51.38-mRNA-1  | Japonica | Indica   |        | Os03g0201901 | OsR498G0305413600.01.T01 | GH10 domain-containing protein (Fragment)                      |
| maker-3-augustus-gene-51.40-mRNA-1  | Japonica | Indica   | NBS-TM | Os07g0573100 | OsR498G0305414000.01.T04 | Adenylyl-sulfate kinase                                        |
| maker-3-augustus-gene-51.44-mRNA-1  | Japonica | NA       |        | Os03g0202200 | OsR498G0305414200.01.T01 | Outer mitochondrial membrane protein porin                     |
| maker-3-augustus-gene-51.47-mRNA-1  | Japonica | NA       |        | Os03g0202300 | OsR498G0305414400.01.T01 | Ribosomal RNA large subunit methyltransferase N                |
| maker-3-augustus-gene-51.5-mRNA-1   | Japonica | Indica   |        | Os03g0201400 | OsR498G0305412700.01.T01 | GH10 domain-containing protein (Fragment)                      |
| maker-3-augustus-gene-51.8-mRNA-1   | Japonica | NA       |        | Os03g0201700 | OsR498G0305413100.01.T01 | Elongator complex protein 5                                    |
| maker-3-augustus-gene-52.36-mRNA-1  | Japonica | NA       |        | Os09g0506800 | OsR498G0917770500.01.T06 | HORMA domain-containing protein 1                              |
| maker-3-augustus-gene-52.41-mRNA-1  | Japonica | NA       |        |              |                          | Urb2 domain-containing protein                                 |
| maker-3-augustus-gene-52.44-mRNA-1  | Japonica | NA       |        | Os03g0203200 | OsR498G0305418300.01.T06 | Strigolactone esterase                                         |
| maker-3-augustus-gene-52.46-mRNA-1  | Japonica | NA       |        | Os03g0203700 | OsR498G0305418900.01.T01 | Calcium-transporting ATPase                                    |
| maker-3-augustus-gene-52.48-mRNA-1  | Japonica | NA       |        | Os03g0204100 | OsR498G0305420500.01.T04 | Formin-like protein 8                                          |
| maker-3-augustus-gene-52.50-mRNA-1  | Japonica | NA       |        |              | OsR498G0305422100.01.T01 | PGG domain-containing protein                                  |
| maker-3-augustus-gene-52.52-mRNA-1  | Japonica | NA       |        |              | OsR498G0305423500.01.T01 | F-box domain-containing protein                                |
| maker-3-augustus-gene-52.54-mRNA-1  | Japonica | NA       |        | Os03g0203000 | OsR498G0305416600.01.T01 | Somatic embryogenesis related protein                          |
| maker-3-augustus-gene-52.57-mRNA-1  | Japonica | NA       |        | Os03g0203800 | OsR498G0305419200.01.T01 | D-type cyclin                                                  |
| maker-3-augustus-gene-52.61-mRNA-1  | Japonica | NA       |        | Os03g0204500 | OsR498G0305422800.01.T01 |                                                                |
| maker-3-augustus-gene-53.26-mRNA-1  | Japonica | NA       |        | Os03g0205400 | OsR498G0305425700.01.T01 | DNA repair protein UVH3                                        |
| maker-3-augustus-gene-53.31-mRNA-1  | Japonica | Japonica |        | Os03g0205500 | OsR498G0305425900.01.T01 | Membrane-associated progesterone-binding protein 4             |
| maker-3-augustus-gene-53.36-mRNA-1  | Japonica | NA       |        | Os03g0205700 | OsR498G0305426900.01.T02 | BTB/POZ domain-containing protein NPY2                         |
| maker-3-augustus-gene-53.38-mRNA-1  | Japonica | NA       |        |              |                          |                                                                |
| maker-3-augustus-gene-53.40-mRNA-1  | Japonica | NA       |        | Os03g0205000 | OsR498G0305424000.01.T01 | CUE domain containing protein, expressed                       |
| maker-3-augustus-gene-53.43-mRNA-1  | Japonica | NA       |        |              | OsR498G0305424200.01.T02 | Retrotransposon protein, putative, Ty1-copia subclass          |
| maker-3-augustus-gene-53.46-mRNA-1  | Japonica | NA       |        |              | OsR498G0305424600.01.T01 | Transcription factor bHLH85 like                               |
| maker-3-augustus-gene-53.48-mRNA-1  | Japonica | NA       |        | Os03g0205800 | OsR498G0305427400.01.T01 | probable N-acetyltransferase HLS1                              |
| maker-3-augustus-gene-53.52-mRNA-1  | Japonica | NA       |        |              |                          | ATP-dependent RNA helicase DDX18                               |
| maker-3-augustus-gene-53.54-mRNA-1  | Japonica | Indica   |        | Os03g0206300 | OsR498G0305429200.01.T05 | Sulfhydryl oxidase                                             |
| maker-3-augustus-gene-53.60-mRNA-1  | Japonica | NA       |        | Os03g0206400 |                          |                                                                |

|                                    |          |          |           |              |                          |                                                                            |
|------------------------------------|----------|----------|-----------|--------------|--------------------------|----------------------------------------------------------------------------|
| maker-3-augustus-gene-54.40-mRNA-1 | Japonica | NA       |           | Os03g0207400 | OsR498G0305432300.01.T01 | Protein-serine/threonine phosphatase                                       |
| maker-3-augustus-gene-54.42-mRNA-1 | Japonica | NA       |           | Os03g0207700 |                          |                                                                            |
| maker-3-augustus-gene-54.44-mRNA-1 | Japonica | NA       |           |              | OsR498G0305433300.01.T01 | Tetratricopeptide repeat protein 1                                         |
| maker-3-augustus-gene-54.46-mRNA-1 | Japonica | NA       |           |              | OsR498G0305435100.01.T01 | Cyclin N-terminal domain-containing protein                                |
| maker-3-augustus-gene-54.47-mRNA-1 | Japonica | NA       |           |              | OsR498G0305435100.01.T01 | Cyclin N-terminal domain-containing protein                                |
| maker-3-augustus-gene-54.63-mRNA-1 | Japonica | NA       |           | Os03g0207200 | OsR498G0305431600.01.T04 | Syntaxin/t-SNARE family protein                                            |
| maker-3-augustus-gene-54.66-mRNA-1 | Japonica | NA       |           | Os03g0207250 | OsR498G0305431800.01.T01 | 54S ribosomal protein L51, mitochondrial                                   |
| maker-3-augustus-gene-54.69-mRNA-1 | Japonica | NA       | Kinase-TM | Os03g0207300 | OsR498G0305432000.01.T01 | Protein kinase CK2 alpha chain                                             |
| maker-3-augustus-gene-54.74-mRNA-1 | Japonica | NA       |           | Os03g0207900 | OsR498G0305433600.01.T01 | Retinoblastoma-binding protein-like                                        |
| maker-3-augustus-gene-54.77-mRNA-1 | Japonica | NA       |           | Os03g0208500 | OsR498G0305434000.01.T01 | Divalent metal transporter 1                                               |
| maker-3-augustus-gene-55.36-mRNA-1 | Japonica | NA       |           |              |                          | Vesicle transport protein GOT1                                             |
| maker-3-augustus-gene-55.39-mRNA-1 | Japonica | NA       |           | Os03g0209600 | OsR498G0305438500.01.T01 | Methionyl-tRNA synthetase                                                  |
| maker-3-augustus-gene-55.49-mRNA-1 | Japonica | Indica   |           | Os03g0256800 | OsR498G0305604600.01.T02 | Rho GTPase activation protein (RhoGAP) with PH domain                      |
| maker-3-augustus-gene-55.59-mRNA-1 | Japonica | NA       |           |              | OsR498G0305440700.01.T04 | Pentatricopeptide repeat-containing family protein                         |
| maker-3-augustus-gene-55.63-mRNA-1 | Japonica | NA       |           |              | OsR498G0305441300.01.T02 | Acetyl-CoA decarboxylase/synthase complex subunit alpha 1                  |
| maker-3-augustus-gene-55.66-mRNA-1 | Japonica | NA       |           | Os03g0208900 | OsR498G0305435600.01.T02 | ADP-glucose pyrophosphorylase                                              |
| maker-3-augustus-gene-55.72-mRNA-1 | Japonica | NA       |           |              |                          | S-acyltransferase                                                          |
| maker-3-augustus-gene-55.77-mRNA-1 | Japonica | NA       |           | Os03g0210400 | OsR498G0305440600.01.T03 | Pre-mRNA-processing factor like                                            |
| maker-3-augustus-gene-56.40-mRNA-1 | Japonica | NA       |           |              | OsR498G0305442500.01.T01 | ABC transporter permease protein YtcP                                      |
| maker-3-augustus-gene-56.42-mRNA-1 | Japonica | Indica   |           | Os03g0211600 | OsR498G0305443900.01.T01 | Pentatricopeptide repeat                                                   |
| maker-3-augustus-gene-56.44-mRNA-1 | Japonica | NA       |           | Os03g0211700 | OsR498G0305444100.01.T03 | Glucuronidase 3                                                            |
| maker-3-augustus-gene-56.49-mRNA-1 | Japonica | NA       | LRR       |              | OsR498G0305445900.01.T02 | Plant intracellular Ras-group-related LRR protein 7                        |
| maker-3-augustus-gene-56.54-mRNA-1 | Japonica | NA       |           |              |                          | SNAP25 isogenyous protein SNAP33                                           |
| maker-3-augustus-gene-56.57-mRNA-1 | Japonica | NA       |           |              |                          | TPX2 (Targeting protein for Xklp2) protein family                          |
| maker-3-augustus-gene-56.60-mRNA-1 | Japonica | NA       |           | Os03g0212700 | OsR498G0305446900.01.T01 | Mitochondrial-processing peptidase subunit beta like                       |
| maker-3-augustus-gene-56.64-mRNA-1 | Japonica | Indica   |           | Os03g0210800 | OsR498G0305441600.01.T04 | Nucleotidyltransferase domain containing protein, expressed                |
| maker-3-augustus-gene-56.72-mRNA-1 | Japonica | Indica   |           | Os12g0578500 | OsR498G0305444400.01.T01 | Hexosyltransferase                                                         |
| maker-3-augustus-gene-56.75-mRNA-1 | Japonica | NA       | LRR-TM    | Os03g0211900 | OsR498G0305445400.01.T01 | probable leucine-rich repeat receptor-like protein kinase At1g35710        |
| maker-3-augustus-gene-56.79-mRNA-1 | Japonica | NA       |           | Os03g0212800 | OsR498G0305447400.01.T02 | Sinigrinase                                                                |
| maker-3-augustus-gene-57.0-mRNA-1  | Japonica | NA       |           | Os03g0213100 | OsR498G0305448700.01.T01 | Transport protein Sec61 subunit alpha-like                                 |
| maker-3-augustus-gene-57.10-mRNA-1 | Japonica | NA       |           |              | OsR498G0305449700.01.T03 |                                                                            |
| maker-3-augustus-gene-57.12-mRNA-1 | Japonica | Japonica |           | Os03g0213600 | OsR498G0305449900.01.T02 |                                                                            |
| maker-3-augustus-gene-57.18-mRNA-1 | Japonica | NA       |           |              | OsR498G0305450900.01.T06 | Hydroxyproline-rich glycoprotein family protein, putative, expressed       |
| maker-3-augustus-gene-57.25-mRNA-1 | Japonica | NA       |           | Os03g0214000 | OsR498G0305451100.01.T02 | Purple acid phosphatase                                                    |
| maker-3-augustus-gene-57.30-mRNA-1 | Japonica | NA       |           | Os03g0214100 | OsR498G0305451300.01.T01 | Replication protein A subunit                                              |
| maker-3-augustus-gene-57.32-mRNA-1 | Japonica | NA       |           |              | OsR498G0305449400.01.T03 | DEXH-box ATP-dependent RNA helicase DEXH14                                 |
| maker-3-augustus-gene-57.41-mRNA-1 | Japonica | NA       |           |              | OsR498G0305450200.01.T04 | Protein root UVB sensitive 3                                               |
| maker-3-augustus-gene-57.6-mRNA-1  | Japonica | NA       |           | Os03g0213300 | OsR498G0305449100.01.T01 |                                                                            |
| maker-3-augustus-gene-58.0-mRNA-1  | Japonica | NA       |           | Os03g0214600 | OsR498G0305452300.01.T01 | Proteasome component (PCI) domain                                          |
| maker-3-augustus-gene-58.12-mRNA-1 | Japonica | NA       |           | Os03g0214200 | OsR498G0305451600.01.T01 | Ninja-family protein 1                                                     |
| maker-3-augustus-gene-58.15-mRNA-1 | Japonica | NA       |           | Os03g0214400 | OsR498G0305452200.01.T02 | Digalactosyldiacylglycerol synthase                                        |
| maker-3-augustus-gene-58.20-mRNA-1 | Japonica | NA       |           | Os03g0214900 | OsR498G0305452600.01.T01 | Zinc finger CCCH domain-containing protein 55                              |
| maker-3-augustus-gene-58.24-mRNA-1 | Japonica | NA       |           | Os03g0215400 | OsR498G0305455800.01.T01 | Leafy hull sterile 1 (Fragment)                                            |
| maker-3-augustus-gene-58.5-mRNA-1  | Japonica | NA       |           | Os03g0215200 | OsR498G0305454900.01.T02 | DROOPING LEAF                                                              |
| maker-3-augustus-gene-58.8-mRNA-1  | Japonica | NA       |           | Os03g0215700 | OsR498G0305456700.01.T02 | microtubule-associated protein 70-5-like isoform X1                        |
| maker-3-augustus-gene-59.0-mRNA-1  | Japonica | NA       |           | Os03g0215800 | OsR498G0305457100.01.T01 | PALP domain-containing protein (Fragment)                                  |
| maker-3-augustus-gene-59.11-mRNA-1 | Japonica | NA       |           | Os03g0216800 | OsR498G0305461700.01.T06 | Polygalacturonase                                                          |
| maker-3-augustus-gene-59.14-mRNA-1 | Japonica | Indica   |           | Os03g0216900 | OsR498G0305462100.01.T02 |                                                                            |
| maker-3-augustus-gene-59.17-mRNA-1 | Japonica | NA       |           | Os03g0217200 | OsR498G0305462500.01.T04 | FBD domain-containing protein                                              |
| maker-3-augustus-gene-59.22-mRNA-1 | Japonica | NA       |           | Os03g0216700 | OsR498G0305460600.01.T03 | Protein DETOXIFICATION                                                     |
| maker-3-augustus-gene-59.6-mRNA-1  | Japonica | NA       |           | Os03g0216600 | OsR498G0305460300.01.T01 | Glucan 1,3-alpha-glucosidase                                               |
| maker-3-augustus-gene-6.6-mRNA-1   | Japonica | NA       |           | Os03g0115400 | OsR498G0305118700.01.T02 | WD repeat-containing protein 44                                            |
| maker-3-augustus-gene-60.37-mRNA-1 | Japonica | NA       |           |              | OsR498G0305463500.01.T02 |                                                                            |
| maker-3-augustus-gene-60.41-mRNA-1 | Japonica | NA       |           | Os03g0219100 | OsR498G0305466300.01.T01 | CRAL/TRIO domain containing protein, expressed                             |
| maker-3-augustus-gene-60.44-mRNA-1 | Japonica | Indica   |           | Os03g0217200 | OsR498G0305463200.01.T03 | FBD domain-containing protein                                              |
| maker-3-augustus-gene-60.47-mRNA-1 | Japonica | Indica   |           | Os03g0218200 | OsR498G0305463200.01.T04 | FBD domain-containing protein                                              |
| maker-3-augustus-gene-60.50-mRNA-1 | Japonica | NA       |           | Os03g0219200 | OsR498G0305466600.01.T01 | Superoxide dismutase                                                       |
| maker-3-augustus-gene-60.55-mRNA-1 | Japonica | NA       |           | Os03g0219300 | OsR498G0305466800.01.T01 | Tubulin alpha chain                                                        |
| maker-3-augustus-gene-60.58-mRNA-1 | Japonica | NA       |           | Os03g0219400 | OsR498G0305467000.01.T01 | Beta-N-acetylhexosaminidase                                                |
| maker-3-augustus-gene-61.24-mRNA-1 | Japonica | NA       |           |              | OsR498G0305467700.01.T02 | SprT-like domain-containing protein Spartan (projected from Caenorhabditis |
| maker-3-augustus-gene-61.29-mRNA-1 | Japonica | NA       |           | Os03g0219900 | OsR498G0305467900.01.T05 | Large subunit ribosomal protein L15                                        |

|                                    |          |          |               |              |                          |                                                                        |
|------------------------------------|----------|----------|---------------|--------------|--------------------------|------------------------------------------------------------------------|
| maker-3-augustus-gene-61.31-mRNA-1 | Japonica | NA       |               |              |                          |                                                                        |
| maker-3-augustus-gene-61.34-mRNA-1 | Japonica | Indica   |               | Os03g0221200 | OsR498G0305472100.01.T01 | Hcy-binding domain-containing protein (Fragment)                       |
| maker-3-augustus-gene-61.37-mRNA-1 | Japonica | NA       |               | Os03g0221500 | OsR498G0305472900.01.T01 | Glucan endo-1,3-beta-D-glucosidase                                     |
| maker-3-augustus-gene-61.40-mRNA-1 | Japonica | NA       |               | Os03g0220100 | OsR498G0305468600.01.T01 | Very-long-chain 3-oxoacyl-CoA synthase                                 |
| maker-3-augustus-gene-61.42-mRNA-1 | Japonica | Indica   |               | Os03g0221300 | OsR498G0305472400.01.T01 | NAC domain-containing protein 8                                        |
| maker-3-augustus-gene-62.49-mRNA-1 | Japonica | NA       |               |              | OsR498G0305476700.01.T07 | Chaperone DnaJ                                                         |
| maker-3-augustus-gene-62.54-mRNA-1 | Japonica | NA       |               |              | OsR498G0305477100.01.T03 | Chaperone protein DnaJ                                                 |
| maker-3-augustus-gene-62.58-mRNA-1 | Japonica | NA       | Kinase-LRR-TM | Os03g0223000 | OsR498G0305477500.01.T01 | Atypical receptor-like kinase MARK                                     |
| maker-3-augustus-gene-62.61-mRNA-1 | Japonica | Indica   |               | Os03g0223200 | OsR498G0305478700.01.T01 | Cinnamyl-alcohol dehydrogenase                                         |
| maker-3-augustus-gene-62.63-mRNA-1 | Japonica | Indica   |               | Os01g0862800 | OsR498G0305479700.01.T01 | NAC domain-containing                                                  |
| maker-3-augustus-gene-62.65-mRNA-1 | Japonica | NA       |               |              | OsR498G0305473400.01.T03 | Dynein light chain 1, axonemal                                         |
| maker-3-augustus-gene-62.72-mRNA-1 | Japonica | NA       |               | Os03g0222100 | OsR498G0305474200.01.T01 | Neoplastic transformation suppressor Pcd4/MA-3, contains MA3 domain    |
| maker-3-augustus-gene-62.74-mRNA-1 | Japonica | NA       |               | Os03g0223400 | OsR498G0305479200.01.T01 | Glutamine synthetase cytosolic isozyme                                 |
| maker-3-augustus-gene-62.80-mRNA-1 | Japonica | NA       |               |              |                          |                                                                        |
| maker-3-augustus-gene-63.0-mRNA-1  | Japonica | NA       |               | Os03g0223900 | OsR498G0305481700.01.T01 | UDP-3-O-acyl-N-acetylglucosamine deacetylase                           |
| maker-3-augustus-gene-63.11-mRNA-1 | Japonica | Indica   |               | Os03g0224501 | OsR498G0305484500.01.T01 |                                                                        |
| maker-3-augustus-gene-63.14-mRNA-1 | Japonica | NA       |               | Os03g0224700 | OsR498G0305484900.01.T03 | Heat stress transcription factor A-9                                   |
| maker-3-augustus-gene-63.16-mRNA-1 | Japonica | NA       |               |              |                          | PLATZ transcription factor family protein                              |
| maker-3-augustus-gene-63.18-mRNA-1 | Japonica | NA       |               | Os03g0225500 | OsR498G0305487700.01.T01 | Nuclear pore complex protein NUP133                                    |
| maker-3-augustus-gene-63.21-mRNA-1 | Japonica | Indica   |               | Os03g0224300 | OsR498G0305483400.01.T02 | Trehalose phosphate synthase                                           |
| maker-3-augustus-gene-63.23-mRNA-1 | Japonica | NA       |               | Os03g0225200 | OsR498G0305487000.01.T05 | Cyclin N-terminal domain-containing protein (Fragment)                 |
| maker-3-augustus-gene-63.6-mRNA-1  | Japonica | NA       |               | Os03g0224200 | OsR498G0305483100.01.T03 | Two-component response regulator ORR21                                 |
| maker-3-augustus-gene-64.0-mRNA-1  | Japonica | NA       |               |              | OsR498G0305487900.01.T03 | Conserved oligomeric Golgi complex subunit 6                           |
| maker-3-augustus-gene-64.10-mRNA-1 | Japonica | Japonica |               | Os03g0226400 | OsR498G0305490500.01.T01 | Metal tolerance protein 4                                              |
| maker-3-augustus-gene-64.15-mRNA-1 | Japonica | NA       |               | Os03g0226600 | OsR498G0305491100.01.T01 |                                                                        |
| maker-3-augustus-gene-64.25-mRNA-1 | Japonica | NA       | Kinase-TM     |              | OsR498G0305491900.01.T01 | Proline-rich receptor-like protein kinase PERK4 isoform A              |
| maker-3-augustus-gene-64.27-mRNA-1 | Japonica | NA       |               | Os05g0471800 |                          | Far-red impaired response protein-like                                 |
| maker-3-augustus-gene-64.30-mRNA-1 | Japonica | NA       |               | Os03g0226200 | OsR498G0305489600.01.T01 | Non-symbiotic hemoglobin                                               |
| maker-3-augustus-gene-64.32-mRNA-1 | Japonica | NA       |               | Os03g0226700 | OsR498G0305491400.01.T01 |                                                                        |
| maker-3-augustus-gene-64.4-mRNA-1  | Japonica | NA       | Kinase-TM     | Os03g0225700 | OsR498G0305488100.01.T01 | Wall-associated receptor kinase                                        |
| maker-3-augustus-gene-64.6-mRNA-1  | Japonica | NA       |               |              |                          |                                                                        |
| maker-3-augustus-gene-64.8-mRNA-1  | Japonica | NA       | Kinase-TM     | Os03g0226300 | OsR498G0305489900.01.T01 | Pto kinase interactor                                                  |
| maker-3-augustus-gene-65.0-mRNA-1  | Japonica | NA       |               | Os03g0227000 | OsR498G0305492100.01.T03 | Coatomer subunit gamma                                                 |
| maker-3-augustus-gene-65.14-mRNA-1 | Japonica | NA       |               | Os03g0227500 | OsR498G0305494100.01.T01 |                                                                        |
| maker-3-augustus-gene-65.16-mRNA-1 | Japonica | NA       |               | Os03g0227700 | OsR498G0305496100.01.T01 | Brassinosteroid synthesis1                                             |
| maker-3-augustus-gene-65.20-mRNA-1 | Japonica | NA       | Kinase-TM     | Os03g0227900 | OsR498G0305497400.01.T02 | probable serine/threonine-protein kinase At1g01540                     |
| maker-3-augustus-gene-65.7-mRNA-1  | Japonica | NA       |               | Os03g0227300 | OsR498G0305493300.01.T02 | DNA-directed DNA polymerase                                            |
| maker-3-augustus-gene-66.0-mRNA-1  | Japonica | NA       |               | Os03g0228400 | OsR498G0305498900.01.T01 | AP complex subunit sigma                                               |
| maker-3-augustus-gene-66.10-mRNA-1 | Japonica | NA       |               | Os03g0227966 | OsR498G0305505200.01.T01 | Protein DETOXIFICATION                                                 |
| maker-3-augustus-gene-66.4-mRNA-1  | Japonica | NA       |               | Os03g0228500 | OsR498G0305499100.01.T01 |                                                                        |
| maker-3-augustus-gene-66.6-mRNA-1  | Japonica | NA       |               | Os03g0228200 | OsR498G0305498600.01.T03 | Erythronate-4-phosphate dehydrogenase family protein isoform 1         |
| maker-3-augustus-gene-66.8-mRNA-1  | Japonica | NA       | Kinase-LRR-TM | Os03g0228800 | OsR498G0305501000.01.T01 | Leucine-rich repeat receptor-like serine/threonine-protein kinase BAM1 |
| maker-3-augustus-gene-67.14-mRNA-1 | Japonica | NA       |               |              | OsR498G0305506000.01.T01 | Maf family protein, putative, expressed                                |
| maker-3-augustus-gene-67.20-mRNA-1 | Japonica | NA       |               | Os03g0231700 | OsR498G0305514600.01.T05 | Squalene monooxygenase                                                 |
| maker-3-augustus-gene-67.23-mRNA-1 | Japonica | Indica   |               | Os03g0231800 | OsR498G0305514800.01.T01 | Squalene monooxygenase                                                 |
| maker-3-augustus-gene-68.0-mRNA-1  | Japonica | NA       |               | Os03g0232400 | OsR498G0305519700.01.T01 | Phytosulfokine-alpha                                                   |
| maker-3-augustus-gene-68.10-mRNA-1 | Japonica | NA       |               | Os03g0232200 | OsR498G0305517400.01.T02 | AP2-like ethylene-responsive transcription factor ANT                  |
| maker-3-augustus-gene-68.14-mRNA-1 | Japonica | NA       |               | Os03g0232800 | OsR498G0305522200.01.T01 | 1-O-acylceramide synthase                                              |
| maker-3-augustus-gene-68.16-mRNA-1 | Japonica | NA       |               | Os03g0233200 | OsR498G0305524800.01.T01 | Pathogenesis-related protein 5                                         |
| maker-3-augustus-gene-68.2-mRNA-1  | Japonica | NA       |               | Os03g0232500 | OsR498G0305520300.01.T04 | EngB-type G domain-containing protein (Fragment)                       |
| maker-3-augustus-gene-68.5-mRNA-1  | Japonica | NA       |               | Os03g0233000 | OsR498G0305524100.01.T01 | Calcium uniporter protein 2, mitochondrial                             |
| maker-3-augustus-gene-68.7-mRNA-1  | Japonica | NA       |               |              | OsR498G0305516600.01.T02 | Transcription factor bHLH62                                            |
| maker-3-augustus-gene-69.43-mRNA-1 | Japonica | NA       |               | Os03g0233500 | OsR498G0305525500.01.T01 | probable E3 ubiquitin-protein ligase ARI2                              |
| maker-3-augustus-gene-69.46-mRNA-1 | Japonica | NA       |               | Os03g0233800 | OsR498G0305526500.01.T05 | Ternary complex factor MIP1                                            |
| maker-3-augustus-gene-69.52-mRNA-1 | Japonica | NA       |               | Os03g0233900 | OsR498G0305526700.01.T01 | Non-symbiotic hemoglobin                                               |
| maker-3-augustus-gene-69.54-mRNA-1 | Japonica | NA       |               | Os03g0234000 | OsR498G0305526900.01.T01 | GLOBIN domain-containing protein                                       |
| maker-3-augustus-gene-69.56-mRNA-1 | Japonica | NA       |               | Os03g0234100 | OsR498G0305527100.01.T01 | GLOBIN domain-containing protein                                       |
| maker-3-augustus-gene-69.58-mRNA-1 | Japonica | Indica   |               | Os10g0109300 | OsR498G0305527500.01.T01 | Peroxidase                                                             |
| maker-3-augustus-gene-69.60-mRNA-1 | Japonica | NA       |               | Os03g0235100 | OsR498G0305528700.01.T03 | LIS motif containing protein                                           |
| maker-3-augustus-gene-69.63-mRNA-1 | Japonica | NA       |               |              | OsR498G0305527800.01.T02 | Transposon protein, putative, unclassified, expressed                  |
| maker-3-augustus-gene-69.67-mRNA-1 | Japonica | NA       |               | Os03g0234900 | OsR498G0305528200.01.T01 | Peroxidase                                                             |

|                                    |          |          |           |              |                          |                                                                      |
|------------------------------------|----------|----------|-----------|--------------|--------------------------|----------------------------------------------------------------------|
| maker-3-augustus-gene-69.68-mRNA-1 | Japonica | NA       |           | Os03g0235000 | OsR498G0305528200.01.T04 | Peroxidase                                                           |
| maker-3-augustus-gene-69.78-mRNA-1 | Japonica | NA       |           |              | OsR498G0305529200.01.T05 | Peptide transporter PTR2                                             |
| maker-3-augustus-gene-69.82-mRNA-1 | Japonica | NA       |           | Os03g0235700 | OsR498G0305529600.01.T01 | Proton-dependent oligopeptide transporter                            |
| maker-3-augustus-gene-69.87-mRNA-1 | Japonica | NA       |           | Os03g0235900 | OsR498G0305529800.01.T02 | Low affinity nitrate transporter (Fragment)                          |
| maker-3-augustus-gene-7.0-mRNA-1   | Japonica | Indica   |           | Os03g0116000 | OsR498G0305121100.01.T01 | Mitochondrial inner membrane protein OXA1                            |
| maker-3-augustus-gene-7.11-mRNA-1  | Japonica | NA       |           | Os03g0116400 | OsR498G0305122300.01.T01 | RHOMBOLD-like protein (Fragment)                                     |
| maker-3-augustus-gene-7.14-mRNA-1  | Japonica | NA       |           | Os03g0116700 | OsR498G0305123300.01.T01 | F-box family protein, putative, expressed                            |
| maker-3-augustus-gene-7.17-mRNA-1  | Japonica | NA       |           | Os03g0116800 | OsR498G0305123500.01.T01 | F-box family protein, putative, expressed                            |
| maker-3-augustus-gene-7.22-mRNA-1  | Japonica | NA       |           | Os03g0117200 | OsR498G0305124300.01.T01 | HTP reductase                                                        |
| maker-3-augustus-gene-7.25-mRNA-1  | Japonica | NA       |           | Os03g0117800 | OsR498G0305125100.01.T02 | Protein-ribulosamine 3-kinase, chloroplastic                         |
| maker-3-augustus-gene-7.28-mRNA-1  | Japonica | NA       |           | Os03g0118100 | OsR498G0305125700.01.T01 |                                                                      |
| maker-3-augustus-gene-7.30-mRNA-1  | Japonica | NA       |           | Os03g0118200 | OsR498G0305126100.01.T03 | UDP-galactose/UDP-glucose transporter like                           |
| maker-3-augustus-gene-7.34-mRNA-1  | Japonica | NA       |           | Os03g0116500 | OsR498G0305122600.01.T01 | COP9 signalosome complex subunit                                     |
| maker-3-augustus-gene-7.37-mRNA-1  | Japonica | Indica   |           | Os03g0118600 | OsR498G0305124000.01.T02 | Dihydrodipicolinate reductase                                        |
| maker-3-augustus-gene-7.44-mRNA-1  | Japonica | NA       |           | Os03g0117100 | OsR498G0305124200.01.T02 | Peroxisomal biogenesis factor                                        |
| maker-3-augustus-gene-70.25-mRNA-1 | Japonica | NA       |           | Os03g0236200 | OsR498G0305530900.01.T01 | Glutamate decarboxylase                                              |
| maker-3-augustus-gene-70.29-mRNA-1 | Japonica | NA       |           |              | OsR498G0305533900.01.T01 | Anaphase promoting complex/cyclosome subunit                         |
| maker-3-augustus-gene-70.34-mRNA-1 | Japonica | NA       |           | Os03g0237000 | OsR498G0305534100.01.T01 | Transmembrane 9 superfamily member                                   |
| maker-3-augustus-gene-70.38-mRNA-1 | Japonica | NA       |           | Os03g0237250 |                          | Protein SHOOT GRAVITROPISM 5                                         |
| maker-3-augustus-gene-71.0-mRNA-1  | Japonica | NA       |           | Os03g0238600 | OsR498G0305541500.01.T01 | Purple acid phosphatase                                              |
| maker-3-augustus-gene-71.10-mRNA-1 | Japonica | NA       |           | Os03g0237900 | OsR498G0305538400.01.T01 | Cyclin N-terminal domain-containing protein (Fragment)               |
| maker-3-augustus-gene-71.14-mRNA-1 | Japonica | NA       |           | Os03g0238300 | OsR498G0305539600.01.T01 | Type I inositol polyphosphate 5-phosphatase                          |
| maker-3-augustus-gene-71.16-mRNA-1 | Japonica | Indica   |           | Os03g0238700 | OsR498G0305541800.01.T01 | Procollagen-proline 3-dioxygenase                                    |
| maker-3-augustus-gene-71.2-mRNA-1  | Japonica | NA       |           | Os03g0239200 | OsR498G0305542900.01.T01 | CONSTANS interacting protein 6                                       |
| maker-3-augustus-gene-71.20-mRNA-1 | Japonica | Indica   |           | Os03g0238800 | OsR498G0305542000.01.T01 | Hydroxyproline-rich glycoprotein family protein, putative, expressed |
| maker-3-augustus-gene-71.25-mRNA-1 | Japonica | Indica   |           | Os03g0239000 | OsR498G0305542400.01.T01 | Xyloglucan endotransglucosylase/hydrolase                            |
| maker-3-augustus-gene-71.28-mRNA-1 | Japonica | NA       |           | Os03g0239400 | OsR498G0305543400.01.T02 | MFMR domain-containing protein (Fragment)                            |
| maker-3-augustus-gene-71.4-mRNA-1  | Japonica | NA       |           | Os03g0237600 | OsR498G0305537200.01.T03 | 65-kDa microtubule-associated protein 7                              |
| maker-3-augustus-gene-72.14-mRNA-1 | Japonica | NA       |           | Os03g0240900 | OsR498G0305547000.01.T01 | Misato Segment II tubulin-like domain                                |
| maker-3-augustus-gene-72.15-mRNA-1 | Japonica | NA       |           | Os03g0240900 | OsR498G0305547000.01.T02 | HTH myb-type domain-containing protein                               |
| maker-3-augustus-gene-72.3-mRNA-1  | Japonica | NA       |           | Os03g0240500 | OsR498G0305546200.01.T03 | Translocase of chloroplast                                           |
| maker-3-augustus-gene-72.9-mRNA-1  | Japonica | NA       |           | Os03g0240700 | OsR498G0305546600.01.T02 | Endoplasmic reticulum transmembrane protein                          |
| maker-3-augustus-gene-73.0-mRNA-1  | Japonica | NA       |           | Os03g0241100 | OsR498G0305547500.01.T02 | SANT domain-containing protein                                       |
| maker-3-augustus-gene-73.11-mRNA-1 | Japonica | Indica   |           | Os03g0241400 | OsR498G0305547900.01.T01 | Stress inducible protein coi6.1                                      |
| maker-3-augustus-gene-73.14-mRNA-1 | Japonica | NA       |           |              |                          | Cell cycle checkpoint protein RAD17                                  |
| maker-3-augustus-gene-73.20-mRNA-1 | Japonica | Indica   |           | Os03g0242200 | OsR498G0305550300.01.T05 | GTP-binding protein, putative, expressed                             |
| maker-3-augustus-gene-73.26-mRNA-1 | Japonica | NA       | Kinase-TM |              | OsR498G0305548400.01.T03 | serine/threonine-protein kinase RIPK-like isoform X1                 |
| maker-3-augustus-gene-73.32-mRNA-1 | Japonica | Japonica |           | Os03g0241800 | OsR498G0305549600.01.T04 | Pentatricopeptide repeat-containing protein, putative                |
| maker-3-augustus-gene-73.34-mRNA-1 | Japonica | NA       |           | Os03g0241900 | OsR498G0305549800.01.T01 | Senescence domain-containing protein (Fragment)                      |
| maker-3-augustus-gene-73.37-mRNA-1 | Japonica | Indica   |           | Os03g0243100 | OsR498G0305553600.01.T04 | Actin-depolymerizing factor 5 like                                   |
| maker-3-augustus-gene-73.7-mRNA-1  | Japonica | NA       |           | Os03g0241200 | OsR498G0305547700.01.T01 | Ribonucloprotein (Fragment)                                          |
| maker-3-augustus-gene-74.0-mRNA-1  | Japonica | NA       |           | Os03g0243600 | OsR498G0305555700.01.T02 | ACB domain-containing protein                                        |
| maker-3-augustus-gene-74.20-mRNA-1 | Japonica | NA       |           | Os03g0244000 | OsR498G0305556500.01.T08 | Protein disulfide-isomerase LQY1, chloroplastic isoform A            |
| maker-3-augustus-gene-74.27-mRNA-1 | Japonica | NA       |           | Os03g0244600 | OsR498G0305557700.01.T01 | Auxin import carrier1                                                |
| maker-3-augustus-gene-74.29-mRNA-1 | Japonica | NA       |           | Os01g0874300 | OsR498G0409243500.01.T01 | Transcription factor myb-like protein (Fragment)                     |
| maker-3-augustus-gene-74.31-mRNA-1 | Japonica | NA       |           |              |                          | Beta-Casp domain-containing protein                                  |
| maker-3-augustus-gene-74.38-mRNA-1 | Japonica | NA       |           | Os03g0243300 | OsR498G0305555000.01.T02 | Proteasome subunit Rpn                                               |
| maker-3-augustus-gene-74.4-mRNA-1  | Japonica | Indica   |           | Os03g0243700 | OsR498G0305556100.01.T07 | GH10 domain-containing protein (Fragment)                            |
| maker-3-augustus-gene-74.42-mRNA-1 | Japonica | NA       |           | Os03g0243900 | OsR498G0305556400.01.T01 | Thaumatococcus-like protein 1                                        |
| maker-3-augustus-gene-74.5-mRNA-1  | Japonica | NA       |           |              |                          | Calmodulin-lysine N-methyltransferase                                |
| maker-3-augustus-gene-75.0-mRNA-1  | Japonica | NA       |           | Os03g0245100 | OsR498G0305559500.01.T03 | 4-hydroxy-tetrahydrodipicolinate reductase                           |
| maker-3-augustus-gene-75.10-mRNA-1 | Japonica | NA       |           | Os03g0245200 | OsR498G0305559800.01.T01 | Proline-rich protein 4                                               |
| maker-3-augustus-gene-75.12-mRNA-1 | Japonica | NA       |           | Os03g0245300 | OsR498G0305560000.01.T01 | Proline-rich protein, putative                                       |
| maker-3-augustus-gene-75.14-mRNA-1 | Japonica | NA       |           |              | OsR498G0305562200.01.T01 | RRM domain-containing protein                                        |
| maker-3-augustus-gene-75.16-mRNA-1 | Japonica | NA       |           | Os03g0246800 | OsR498G0305566600.01.T04 | Guanine-nucleotide-exchange protein                                  |
| maker-3-augustus-gene-75.19-mRNA-1 | Japonica | NA       |           | Os03g0246900 | OsR498G0305567000.01.T01 | LOB domain-containing protein 18                                     |
| maker-3-augustus-gene-75.5-mRNA-1  | Japonica | NA       |           | Os03g0246500 | OsR498G0305565900.01.T03 | Filament-like plant protein 4                                        |
| maker-3-augustus-gene-76.0-mRNA-1  | Japonica | NA       |           | Os03g0247300 | OsR498G0305572100.01.T01 |                                                                      |
| maker-3-augustus-gene-76.14-mRNA-1 | Japonica | NA       |           | Os03g0248000 | OsR498G0305574600.01.T02 | Autophagy-related protein 9                                          |
| maker-3-augustus-gene-76.18-mRNA-1 | Japonica | Indica   |           | Os03g0248200 | OsR498G0305575000.01.T02 | Geraniol 8-hydroxylase                                               |
| maker-3-augustus-gene-76.2-mRNA-1  | Japonica | NA       |           | Os03g0247400 |                          |                                                                      |

|                                    |          |          |               |              |                          |                                                                         |
|------------------------------------|----------|----------|---------------|--------------|--------------------------|-------------------------------------------------------------------------|
| maker-3-augustus-gene-76.21-mRNA-1 | Japonica | Indica   |               | Os03g0248200 | OsR498G0305575800.01.T01 | Cytochrome P450 family 76 subfamily C polypeptide 7                     |
| maker-3-augustus-gene-76.23-mRNA-1 | Japonica | NA       |               | Os03g0248600 | OsR498G0305576600.01.T01 | Phosphopyruvate hydratase                                               |
| maker-3-augustus-gene-76.4-mRNA-1  | Japonica | NA       |               |              | OsR498G0305573700.01.T01 | Amino acid binding protein, putative                                    |
| maker-3-augustus-gene-76.8-mRNA-1  | Japonica | NA       |               |              |                          |                                                                         |
| maker-3-augustus-gene-76.9-mRNA-1  | Japonica | NA       |               | Os03g0247000 | OsR498G0305567600.01.T01 | Clp amino terminal domain containing protein, expressed                 |
| maker-3-augustus-gene-77.34-mRNA-1 | Japonica | NA       |               | Os03g0249100 | OsR498G0305577700.01.T01 | IRK-interacting protein                                                 |
| maker-3-augustus-gene-77.36-mRNA-1 | Japonica | NA       |               | Os03g0249200 | OsR498G0305577900.01.T03 | Immature colon carcinoma transcript 1 protein, putative, expressed      |
| maker-3-augustus-gene-77.38-mRNA-1 | Japonica | NA       |               | Os03g0249300 | OsR498G0305578100.01.T01 | Chloride conductance regulatory protein IClN                            |
| maker-3-augustus-gene-77.41-mRNA-1 | Japonica | NA       |               | Os03g0249400 | OsR498G0305578300.01.T01 | 40S ribosomal protein S20                                               |
| maker-3-augustus-gene-77.44-mRNA-1 | Japonica | Indica   |               | Os10g0115550 | OsR498G0305579100.01.T01 | Gibberellin-regulated protein 12                                        |
| maker-3-augustus-gene-77.46-mRNA-1 | Japonica | NA       |               | Os03g0249900 | OsR498G0305580700.01.T01 | Transcriptional regulator ATRX isoform X1                               |
| maker-3-augustus-gene-77.49-mRNA-1 | Japonica | NA       |               | Os03g0250900 |                          |                                                                         |
| maker-3-augustus-gene-77.51-mRNA-1 | Japonica | NA       |               |              | OsR498G0305579400.01.T01 | Geraniol 8-hydroxylase                                                  |
| maker-3-augustus-gene-77.53-mRNA-1 | Japonica | Indica   |               | Os10g0177200 | OsR498G0305581000.01.T02 | Glycerol-3-phosphate dehydrogenase-2C mitochondrial                     |
| maker-3-augustus-gene-77.57-mRNA-1 | Japonica | NA       |               |              | OsR498G0305581600.01.T03 |                                                                         |
| maker-3-augustus-gene-78.40-mRNA-1 | Japonica | NA       |               |              | OsR498G0305591300.01.T05 | Piwi domain containing protein, expressed                               |
| maker-3-augustus-gene-78.43-mRNA-1 | Japonica | Indica   |               | Os07g0409100 | OsR498G0305587400.01.T01 | Synaptotagmin-5                                                         |
| maker-3-augustus-gene-78.45-mRNA-1 | Japonica | NA       |               |              |                          | Transcription initiation factor IIF subunit alpha                       |
| maker-3-augustus-gene-78.48-mRNA-1 | Japonica | NA       |               | Os03g0252800 | OsR498G0305591600.01.T04 | Long chain base biosynthesis protein 1                                  |
| maker-3-augustus-gene-78.54-mRNA-1 | Japonica | Indica   |               | Os05g0579600 | OsR498G0305592600.01.T01 | Myb family transcription factor, putative                               |
| maker-3-augustus-gene-79.34-mRNA-1 | Japonica | NA       |               | Os03g0254200 | OsR498G0305596500.01.T01 | Tryptophan/tyrosine permease                                            |
| maker-3-augustus-gene-79.40-mRNA-1 | Japonica | NA       |               | Os03g0253100 | OsR498G0305593200.01.T02 | Phosphomevalonate kinase                                                |
| maker-3-augustus-gene-79.44-mRNA-1 | Japonica | NA       |               | Os03g0253400 |                          | MADS-box transcription factor 31                                        |
| maker-3-augustus-gene-79.46-mRNA-1 | Japonica | NA       |               | Os03g0253800 | OsR498G0305595600.01.T01 | Mitochondrial import inner membrane translocase subunit                 |
| maker-3-augustus-gene-79.50-mRNA-1 | Japonica | Indica   | CC-LRR-NBS-TM | Os03g0254000 | OsR498G0305596400.01.T01 | Disease resistance protein RPS2                                         |
| maker-3-augustus-gene-8.0-mRNA-1   | Japonica | NA       | Kinase-TM     | Os03g0118400 | OsR498G0305126900.01.T01 | Cell division control protein A                                         |
| maker-3-augustus-gene-8.12-mRNA-1  | Japonica | NA       |               | Os03g0118700 | OsR498G0305127700.01.T01 | Putative mandelonitrile lyase                                           |
| maker-3-augustus-gene-8.14-mRNA-1  | Japonica | NA       |               | Os03g0118800 | OsR498G0305128500.01.T01 | Hydroxymethylglutaryl-CoA synthase                                      |
| maker-3-augustus-gene-8.20-mRNA-1  | Japonica | NA       |               | Os03g0118900 | OsR498G0305128700.01.T01 | Ataxin-10                                                               |
| maker-3-augustus-gene-8.22-mRNA-1  | Japonica | NA       |               |              | OsR498G0305132300.01.T04 | 1,3-beta-glucan synthase                                                |
| maker-3-augustus-gene-8.25-mRNA-1  | Japonica | Indica   |               | Os03g0119500 | OsR498G0305132300.01.T03 | 1,3-beta-glucan synthase                                                |
| maker-3-augustus-gene-8.28-mRNA-1  | Japonica | Japonica |               | Os03g0119966 | OsR498G0305133300.01.T01 | NAC domain class transcription factor                                   |
| maker-3-augustus-gene-8.30-mRNA-1  | Japonica | NA       |               | Os03g0119000 | OsR498G0305129000.01.T01 | Oxoglutarate/iron-dependent dioxygenase                                 |
| maker-3-augustus-gene-8.32-mRNA-1  | Japonica | NA       |               | Os03g0119100 | OsR498G0305129400.01.T01 | Phospholipase D                                                         |
| maker-3-augustus-gene-8.6-mRNA-1   | Japonica | NA       |               | Os03g0118600 | OsR498G0305127300.01.T02 | Dihydrodipicolinate reductase                                           |
| maker-3-augustus-gene-80.11-mRNA-1 | Japonica | NA       |               | Os03g0254800 | OsR498G0305598600.01.T01 | Chorismate synthase                                                     |
| maker-3-augustus-gene-80.17-mRNA-1 | Japonica | NA       |               | Os03g0255100 | OsR498G0305600000.01.T02 | Beta-galactosidase                                                      |
| maker-3-augustus-gene-80.34-mRNA-1 | Japonica | NA       |               | Os03g0256400 | OsR498G0305603400.01.T03 | Imidazole glycerol phosphate synthase hisHF                             |
| maker-3-augustus-gene-80.4-mRNA-1  | Japonica | NA       |               | Os03g0254700 | OsR498G0305598000.01.T01 | TOPLESS                                                                 |
| maker-3-augustus-gene-81.0-mRNA-1  | Japonica | NA       |               | Os03g0257900 |                          | COX assembly mitochondrial protein (Fragment)                           |
| maker-3-augustus-gene-81.14-mRNA-1 | Japonica | NA       |               | Os03g0257500 | OsR498G0305606000.01.T01 | Regulator of Vps4 activity in the MVB pathway protein                   |
| maker-3-augustus-gene-81.16-mRNA-1 | Japonica | Japonica |               | Os03g0257600 | OsR498G0305606200.01.T02 | Regulator of Vps4 activity in the MVB pathway protein                   |
| maker-3-augustus-gene-82.13-mRNA-1 | Japonica | NA       |               | Os03g0261500 | OsR498G0305616500.01.T03 | DnaJ subfamily C member like                                            |
| maker-3-augustus-gene-82.5-mRNA-1  | Japonica | NA       |               | Os03g0259900 | OsR498G0305613300.01.T01 | GTD-binding domain-containing protein (Fragment)                        |
| maker-3-augustus-gene-82.7-mRNA-1  | Japonica | NA       |               | Os03g0260600 | OsR498G0305615300.01.T01 | Transcription factor AIG1                                               |
| maker-3-augustus-gene-82.9-mRNA-1  | Japonica | Indica   |               | Os03g0261100 | OsR498G0305615900.01.T01 | Secretory phospholipase A2                                              |
| maker-3-augustus-gene-83.0-mRNA-1  | Japonica | NA       |               |              | OsR498G0305619900.01.T04 | 1-phosphatidylinositol-4-phosphate 5-kinase                             |
| maker-3-augustus-gene-83.13-mRNA-1 | Japonica | NA       | Kinase-TM     |              | OsR498G0305621000.01.T02 | MAP kinase kinase kinase10                                              |
| maker-3-augustus-gene-83.17-mRNA-1 | Japonica | NA       |               |              | OsR498G0305621600.01.T04 | p-loop containing nucleoside triphosphate hydrolase superfamily protein |
| maker-3-augustus-gene-83.23-mRNA-1 | Japonica | NA       |               | Os03g0262400 | OsR498G0305621800.01.T02 | mRNA cap-binding protein (Fragment)                                     |
| maker-3-augustus-gene-83.26-mRNA-1 | Japonica | NA       |               |              | OsR498G0305622000.01.T05 | J domain-containing protein                                             |
| maker-3-augustus-gene-83.5-mRNA-1  | Japonica | NA       |               | Os03g0262100 | OsR498G0305620700.01.T01 | Mago-bind domain-containing protein                                     |
| maker-3-augustus-gene-83.7-mRNA-1  | Japonica | NA       |               |              | OsR498G0305619800.01.T01 | HEAT repeat family protein, expressed                                   |
| maker-3-augustus-gene-84.48-mRNA-1 | Japonica | Japonica |               | Os03g0262700 | OsR498G0305622900.01.T01 | Harpin-induced protein                                                  |
| maker-3-augustus-gene-84.54-mRNA-1 | Japonica | Indica   |               | Os03g0263400 | OsR498G0305625900.01.T02 | Mitochondrial phosphate carrier protein 3 mitochondrial                 |
| maker-3-augustus-gene-84.58-mRNA-1 | Japonica | NA       |               | Os03g0263700 | OsR498G0305626500.01.T04 |                                                                         |
| maker-3-augustus-gene-84.61-mRNA-1 | Japonica | NA       |               | Os03g0263800 | OsR498G0305626700.01.T01 | CONSTANS interacting protein 4                                          |
| maker-3-augustus-gene-84.64-mRNA-1 | Japonica | NA       | Kinase        |              | OsR498G0305629300.01.T03 | Putative LRR receptor-like serine/threonine-protein kinase              |
| maker-3-augustus-gene-84.68-mRNA-1 | Japonica | NA       |               | Os03g0263500 | OsR498G0305626200.01.T01 | Splicing factor 3A subunit like                                         |
| maker-3-augustus-gene-84.72-mRNA-1 | Japonica | NA       |               | Os03g0263600 | OsR498G0305626400.01.T01 | Strictosidine synthase                                                  |
| maker-3-augustus-gene-84.74-mRNA-1 | Japonica | NA       |               |              | OsR498G0305627400.01.T04 | LAG1 longevity assurance homolog 2                                      |

|                                    |          |          |               |              |                          |                                                              |
|------------------------------------|----------|----------|---------------|--------------|--------------------------|--------------------------------------------------------------|
| maker-3-augustus-gene-84.78-mRNA-1 | Japonica | NA       |               | Os03g0264400 | OsR498G0305629600.01.T01 | Anthranilate synthase alpha subunit 2, chloroplastic         |
| maker-3-augustus-gene-85.33-mRNA-1 | Japonica | NA       |               | Os03g0265100 | OsR498G0305632700.01.T01 | Sulfoquinovosyl transferase SQD2                             |
| maker-3-augustus-gene-85.39-mRNA-1 | Japonica | NA       |               | Os03g0265300 | OsR498G0305633700.01.T01 | Peroxisomal nicotinamide adenine dinucleotide carrier        |
| maker-3-augustus-gene-85.43-mRNA-1 | Japonica | NA       |               | Os03g0265400 | OsR498G0305633900.01.T02 | 50S ribosomal protein uL                                     |
| maker-3-augustus-gene-85.45-mRNA-1 | Japonica | NA       |               | Os03g0265500 | OsR498G0305634700.01.T01 | Coronatine-insensitive protein 1                             |
| maker-3-augustus-gene-85.48-mRNA-1 | Japonica | NA       |               | Os03g0265700 | OsR498G0305635300.01.T01 | SH3 domain containing protein, expressed                     |
| maker-3-augustus-gene-85.60-mRNA-1 | Japonica | NA       |               | Os03g0266100 | OsR498G0305636300.01.T01 | GATA type zinc finger transcription factor family protein    |
| maker-3-augustus-gene-85.63-mRNA-1 | Japonica | Indica   | CC-NBS-TM     | Os03g0264800 | OsR498G0305631400.01.T02 | AAA domain-containing protein (Fragment)                     |
| maker-3-augustus-gene-85.66-mRNA-1 | Japonica | NA       |               | Os03g0265200 | OsR498G0305633000.01.T01 | Ubiquitinyl hydrolase 1                                      |
| maker-3-augustus-gene-85.68-mRNA-1 | Japonica | NA       |               |              | OsR498G0305635000.01.T03 | Serine/arginine-rich splicing factor SR45a isoform B         |
| maker-3-augustus-gene-85.72-mRNA-1 | Japonica | NA       |               | Os03g0265900 | OsR498G0305635800.01.T01 | Maternal effect embryo arrest 59                             |
| maker-3-augustus-gene-85.75-mRNA-1 | Japonica | Indica   |               | Os03g0266200 | OsR498G0305636600.01.T01 | Phosphopyruvate hydratase                                    |
| maker-3-augustus-gene-86.1-mRNA-1  | Japonica | NA       | Kinase-LRR-TM | Os03g0266800 | OsR498G0305638100.01.T01 | LRR receptor-like serine/threonine-protein kinase FEI 1      |
| maker-3-augustus-gene-86.20-mRNA-1 | Japonica | NA       |               | Os03g0267500 | OsR498G0305641300.01.T01 | Lipase, putative, expressed                                  |
| maker-3-augustus-gene-86.22-mRNA-1 | Japonica | NA       |               | Os03g0267700 | OsR498G0305642700.01.T01 | Mitochondrial carrier protein, expressed                     |
| maker-3-augustus-gene-86.27-mRNA-1 | Japonica | NA       |               | Os03g0268000 | OsR498G0305643500.01.T06 | Phosphoprotein phosphatase                                   |
| maker-3-augustus-gene-86.30-mRNA-1 | Japonica | NA       |               | Os03g0267300 | OsR498G0305639600.01.T01 | D-fructose-1,6-bisphosphate 1-phosphohydrolase               |
| maker-3-augustus-gene-86.32-mRNA-1 | Japonica | NA       |               | Os03g0267600 | OsR498G0305641600.01.T03 |                                                              |
| maker-3-augustus-gene-86.34-mRNA-1 | Japonica | NA       |               | Os03g0267800 | OsR498G0305643000.01.T03 | LIM zinc-binding domain-containing protein (Fragment)        |
| maker-3-augustus-gene-86.38-mRNA-1 | Japonica | NA       |               | Os03g0268100 | OsR498G0305643800.01.T03 | tropomyosin isoform X2                                       |
| maker-3-augustus-gene-86.45-mRNA-1 | Japonica | NA       |               |              | OsR498G0305644000.01.T01 | Serine/threonine-protein kinase ATG1c                        |
| maker-3-augustus-gene-86.49-mRNA-1 | Japonica | NA       | Kinase-TM     |              | OsR498G0305644000.01.T04 | Serine/threonine-protein kinase ATG1c isoform C              |
| maker-3-augustus-gene-86.51-mRNA-1 | Japonica | NA       |               | Os03g0268300 | OsR498G0305644400.01.T02 | Digalactosyldiacylglycerol synthase                          |
| maker-3-augustus-gene-86.54-mRNA-1 | Japonica | NA       |               | Os03g0268400 | OsR498G0305644600.01.T03 | Mannose-1-phosphate guanylyltransferase                      |
| maker-3-augustus-gene-86.6-mRNA-1  | Japonica | NA       |               | Os03g0266700 | OsR498G0305637700.01.T01 | SH3 domain-containing protein 1                              |
| maker-3-augustus-gene-87.0-mRNA-1  | Japonica | NA       |               | Os03g0269900 | OsR498G0305650300.01.T01 | Ribulose bisphosphate carboxylase/oxygenase activase 1       |
| maker-3-augustus-gene-87.10-mRNA-1 | Japonica | NA       |               | Os03g0269000 | OsR498G0305647200.01.T05 | Tropinone reductase                                          |
| maker-3-augustus-gene-87.14-mRNA-1 | Japonica | Indica   |               | Os03g0269100 | OsR498G0305647600.01.T01 | Tropinone reductase                                          |
| maker-3-augustus-gene-87.18-mRNA-1 | Japonica | NA       | Kinase-TM     | Os03g0269300 | OsR498G0305649000.01.T01 | Serine/threonine protein kinase                              |
| maker-3-augustus-gene-87.2-mRNA-1  | Japonica | NA       |               | Os03g0268600 | OsR498G0305645600.01.T01 | Protein-serine/threonine phosphatase                         |
| maker-3-augustus-gene-87.5-mRNA-1  | Japonica | NA       |               | Os03g0268900 | OsR498G0305646600.01.T01 | Tropinone reductase                                          |
| maker-3-augustus-gene-88.44-mRNA-1 | Japonica | NA       |               | Os03g0270700 | OsR498G0305652300.01.T04 | Hydroxyproline-rich glycoprotein family protein              |
| maker-3-augustus-gene-88.47-mRNA-1 | Japonica | NA       |               | Os03g0271100 | OsR498G0305653500.01.T01 | RNA polymerase sigma factor                                  |
| maker-3-augustus-gene-88.50-mRNA-1 | Japonica | NA       |               | Os03g0271200 | OsR498G0305653700.01.T01 | Chloroplast envelope protein translocase, IAP                |
| maker-3-augustus-gene-88.54-mRNA-1 | Japonica | NA       |               |              | OsR498G0305651800.01.T03 | Splicing factor PWI domain-containing protein                |
| maker-3-augustus-gene-88.55-mRNA-1 | Japonica | Indica   |               | Os03g0270200 | OsR498G0305651800.01.T03 | Splicing factor PWI domain-containing protein                |
| maker-3-augustus-gene-88.71-mRNA-1 | Japonica | NA       |               | Os03g0271400 | OsR498G0305654200.01.T03 | TOG domain-containing protein (Fragment)                     |
| maker-3-augustus-gene-89.0-mRNA-1  | Japonica | Indica   |               | Os03g0272300 | OsR498G0305659100.01.T02 | E3 ubiquitin-protein ligase                                  |
| maker-3-augustus-gene-89.14-mRNA-1 | Japonica | NA       |               | Os03g0273200 | OsR498G0305661600.01.T01 | Laccase                                                      |
| maker-3-augustus-gene-89.6-mRNA-1  | Japonica | NA       |               | Os03g0272400 | OsR498G0305659300.01.T01 | Putative tRNA (Guanine(26)-N(2))-dimethyltransferase 1       |
| maker-3-augustus-gene-89.8-mRNA-1  | Japonica | NA       |               | Os03g0273800 | OsR498G0305664100.01.T01 | Suppressor of disruption of TFIIS-like protein               |
| maker-3-augustus-gene-9.0-mRNA-1   | Japonica | Japonica |               | Os03g0120000 | OsR498G0305134500.01.T04 | Putative reverse transcriptase                               |
| maker-3-augustus-gene-9.12-mRNA-1  | Japonica | NA       |               | Os03g0120200 | OsR498G0305135000.01.T01 |                                                              |
| maker-3-augustus-gene-9.14-mRNA-1  | Japonica | NA       |               | Os03g0120300 | OsR498G0305135800.01.T03 | Tobamovirus multiplication protein 3                         |
| maker-3-augustus-gene-9.19-mRNA-1  | Japonica | NA       |               | Os03g0120400 | OsR498G0305136000.01.T01 | Putative heavy metal-associated domain, HMA                  |
| maker-3-augustus-gene-9.2-mRNA-1   | Japonica | NA       |               | Os03g0120800 | OsR498G0305137100.01.T01 |                                                              |
| maker-3-augustus-gene-9.21-mRNA-1  | Japonica | NA       |               | Os03g0121200 | OsR498G0305140000.01.T01 | Peroxidase                                                   |
| maker-3-augustus-gene-9.23-mRNA-1  | Japonica | NA       |               | Os03g0121300 | OsR498G0305140600.01.T01 | Peroxidase                                                   |
| maker-3-augustus-gene-9.25-mRNA-1  | Japonica | NA       |               |              |                          | Syntaxin of plants SYP5                                      |
| maker-3-augustus-gene-9.27-mRNA-1  | Japonica | Indica   |               | Os03g0121200 | OsR498G0305141200.01.T01 | L-ascorbate peroxidase                                       |
| maker-3-augustus-gene-9.4-mRNA-1   | Japonica | NA       |               | Os03g0121700 | OsR498G0305141300.01.T01 | NAC-A/B domain-containing protein                            |
| maker-3-augustus-gene-9.7-mRNA-1   | Japonica | NA       |               | Os03g0120100 | OsR498G0305134800.01.T02 | ALA-interacting subunit                                      |
| maker-3-augustus-gene-90.26-mRNA-1 | Japonica | NA       |               | Os03g0274000 | OsR498G0305665500.01.T01 | oxysterol-binding protein-related protein 3C-like isoform X2 |
| maker-3-augustus-gene-90.40-mRNA-1 | Japonica | NA       |               | Os03g0275100 | OsR498G0305670300.01.T01 | Pyruvate dehydrogenase phosphatase                           |
| maker-3-augustus-gene-90.42-mRNA-1 | Japonica | NA       |               | Os03g0275400 | OsR498G0305672500.01.T03 | S-acyltransferase                                            |
| maker-3-augustus-gene-90.50-mRNA-1 | Japonica | NA       | Kinase        | Os03g0274800 | OsR498G0305669400.01.T01 | receptor-like cytoplasmic kinase 176                         |
| maker-3-augustus-gene-90.54-mRNA-1 | Japonica | Indica   |               | Os01g0974400 | OsR498G0305671600.01.T01 | E3 ubiquitin-protein ligase XB3                              |
| maker-3-augustus-gene-91.0-mRNA-1  | Japonica | NA       |               | Os03g0275900 | OsR498G0305674500.01.T01 | RING-type E3 ubiquitin transferase                           |
| maker-3-augustus-gene-91.14-mRNA-1 | Japonica | Indica   |               | Os03g0276900 | OsR498G0305679600.01.T01 | Beta-glucuronosyltransferase                                 |
| maker-3-augustus-gene-92.59-mRNA-1 | Japonica | Indica   |               | Os03g0278300 | OsR498G0305684800.01.T05 | THO complex subunit 4                                        |
| maker-3-augustus-gene-95.47-mRNA-1 | Japonica | NA       |               | Os03g0284600 | OsR498G0305711700.01.T01 | Thioredoxin-like protein AAED1, chloroplastic                |



|                                     |          |          |              |              |                          |                                                                            |
|-------------------------------------|----------|----------|--------------|--------------|--------------------------|----------------------------------------------------------------------------|
| maker-3-augustus-gene-96.0-mRNA-1   | Japonica | NA       |              | Os03g0285200 |                          |                                                                            |
| maker-3-augustus-gene-96.12-mRNA-1  | Japonica | Indica   |              | Os03g0286800 | OsR498G0305720700.01.T02 | DDb1-and CUL4-associated factor 8                                          |
| maker-3-augustus-gene-96.15-mRNA-1  | Japonica | NA       |              | Os03g0284900 | OsR498G0305713010.01.T01 | Pentatricopeptide repeat-containing protein chloroplastic                  |
| maker-3-augustus-gene-96.19-mRNA-1  | Japonica | NA       | Kinase-TM    | Os03g0285800 | OsR498G0305716200.01.T01 | Mitogen-activated protein kinase                                           |
| maker-3-augustus-gene-96.2-mRNA-1   | Japonica | NA       |              | Os03g0285700 | OsR498G0305715700.01.T02 | Cytosolic ascorbate peroxidase                                             |
| maker-3-augustus-gene-96.24-mRNA-1  | Japonica | NA       |              |              |                          | Alternative splicing regulator                                             |
| maker-3-augustus-gene-96.28-mRNA-1  | Japonica | NA       |              | Os03g0286500 | OsR498G0305718800.01.T01 | probable RNA-binding protein ARP1 isoform X2                               |
| maker-3-augustus-gene-96.30-mRNA-1  | Japonica | Indica   |              | Os03g0287100 | OsR498G0305721600.01.T04 | Phosphatidylinositol transfer protein expressed                            |
| maker-3-augustus-gene-96.36-mRNA-1  | Japonica | NA       |              | Os03g0287400 | OsR498G0305722400.01.T01 | LOB domain-containing protein 1                                            |
| maker-3-augustus-gene-96.7-mRNA-1   | Japonica | NA       |              | Os03g0286200 | OsR498G0305717700.01.T02 | Arogenate dehydratase/prephenate dehydratase 2 chloroplastic               |
| maker-3-augustus-gene-97.30-mRNA-1  | Japonica | Indica   |              | Os03g0826000 | OsR498G0305723500.01.T03 | Phosphatidylinositol N-acetylglucosaminyltransferase subunit P-related     |
| maker-3-augustus-gene-97.34-mRNA-1  | Japonica | NA       |              | Os03g0287800 | OsR498G0305724100.01.T03 | Glycosyltransferases                                                       |
| maker-3-augustus-gene-97.40-mRNA-1  | Japonica | NA       |              | Os03g0288300 | OsR498G0305726100.01.T01 | AB hydrolase-1 domain-containing protein                                   |
| maker-3-augustus-gene-97.44-mRNA-1  | Japonica | NA       |              |              |                          | Cytochrome c oxidase assembly protein COX                                  |
| maker-3-augustus-gene-97.48-mRNA-1  | Japonica | NA       |              |              | OsR498G0305726700.01.T01 | Pseudouridine synthase                                                     |
| maker-3-augustus-gene-97.54-mRNA-1  | Japonica | NA       |              | Os03g0288600 | OsR498G0305726900.01.T04 | Taxilin                                                                    |
| maker-3-augustus-gene-97.59-mRNA-1  | Japonica | NA       |              | Os03g0288800 | OsR498G0305727500.01.T01 | Transmembrane protein 209                                                  |
| maker-3-augustus-gene-97.62-mRNA-1  | Japonica | NA       |              | Os03g0288900 | OsR498G0305727700.01.T02 | Nascent polypeptide-associated complex subunit alpha, muscle-specific form |
| maker-3-augustus-gene-97.64-mRNA-1  | Japonica | NA       | CC-Kinase-TM | Os03g0289100 | OsR498G0305728500.01.T03 | Serine/threonine protein kinase OSK4                                       |
| maker-3-augustus-gene-97.71-mRNA-1  | Japonica | NA       |              | Os03g0287900 | OsR498G0305724400.01.T02 | Thioredoxin domain-containing protein 5                                    |
| maker-3-augustus-gene-97.74-mRNA-1  | Japonica | NA       |              | Os03g0288700 | OsR498G0305727200.01.T01 | Lipid phosphate phosphatase gammaic                                        |
| maker-3-augustus-gene-98.25-mRNA-1  | Japonica | NA       |              | Os03g0289300 | OsR498G0305729500.01.T02 | Phosphoinositide phospholipase C                                           |
| maker-3-augustus-gene-98.29-mRNA-1  | Japonica | Indica   |              | Os03g0289400 | OsR498G0305729900.01.T01 | Rhodanese-like domain-containing protein 10                                |
| maker-3-augustus-gene-98.31-mRNA-1  | Japonica | NA       |              | Os03g0290900 | OsR498G0305735700.01.T01 | Putative PMR5 domain, PC-Esterase, trichome birefringence-like family      |
| maker-3-augustus-gene-98.33-mRNA-1  | Japonica | NA       |              | Os03g0291200 | OsR498G0305736100.01.T01 | Protein trichome birefringence-like                                        |
| maker-3-augustus-gene-98.36-mRNA-1  | Japonica | NA       |              | Os03g0289800 | OsR498G0305731000.01.T01 | Jasmonate-regulated gene 21                                                |
| maker-3-augustus-gene-98.40-mRNA-1  | Japonica | Indica   |              | Os03g0290300 | OsR498G0305733600.01.T01 | Temperature-sensitive omega-3 fatty acid desaturase, chloroplastic         |
| maker-3-augustus-gene-98.45-mRNA-1  | Japonica | Indica   |              | Os07g0693700 | OsR498G0305734500.01.T01 | V-SNARE coiled-coil homology domain-containing protein                     |
| maker-3-augustus-gene-98.47-mRNA-1  | Japonica | NA       |              | Os03g0290500 | OsR498G0305734800.01.T02 | Phosphoinositide phosphatase SAC8                                          |
| maker-3-augustus-gene-99.25-mRNA-1  | Japonica | NA       |              | Os03g0291800 | OsR498G0305738500.01.T01 | Protein trichome birefringence-like 28                                     |
| maker-3-augustus-gene-99.29-mRNA-1  | Japonica | NA       |              | Os03g0292100 | OsR498G0305739300.01.T01 | PPM-type phosphatase domain-containing protein                             |
| maker-3-augustus-gene-99.32-mRNA-1  | Japonica | NA       |              | Os03g0293000 | OsR498G0305742100.01.T01 | J domain-containing protein (Fragment)                                     |
| maker-3-augustus-gene-99.34-mRNA-1  | Japonica | NA       |              | Os03g0293100 | OsR498G0305742300.01.T02 | UDP-Glycosyltransferase superfamily protein isoform 1                      |
| maker-3-augustus-gene-99.37-mRNA-1  | Japonica | NA       | NBS-TM       |              | OsR498G0305742500.01.T01 | Macro domain-containing protein                                            |
| maker-3-augustus-gene-99.40-mRNA-1  | Japonica | NA       |              |              | OsR498G0305736400.01.T01 | Asparagine synthetase [glutamine-hydrolyzing]                              |
| maker-3-augustus-gene-99.46-mRNA-1  | Japonica | NA       |              | Os03g0292800 | OsR498G0305741800.01.T01 | Ran-binding protein c                                                      |
| maker-3-augustus-gene-99.49-mRNA-1  | Japonica | NA       |              |              | OsR498G0305742000.01.T01 | Importin-beta                                                              |
| maker-4-augustus-gene-0.3-mRNA-1    | Japonica | NA       |              |              | OsR498G0816152000.01.T01 |                                                                            |
| maker-4-augustus-gene-1.0-mRNA-1    | Japonica | NA       |              |              | OsR498G1221334400.01.T01 |                                                                            |
| maker-4-augustus-gene-10.0-mRNA-1   | Japonica | NA       |              | Os04g0184100 | OsR498G0407660100.01.T01 | Amidase domain-containing protein (Fragment)                               |
| maker-4-augustus-gene-10.1-mRNA-1   | Japonica | Indica   |              | Os04g0183500 | OsR498G0407660700.01.T01 | Amidase domain-containing protein (Fragment)                               |
| maker-4-augustus-gene-10.12-mRNA-1  | Japonica | Japonica |              | Os04g0185100 | OsR498G0407661200.01.T01 | CDT1 domain-containing protein                                             |
| maker-4-augustus-gene-10.6-mRNA-1   | Japonica | Indica   |              | Os04g0185000 | OsR498G0407660700.01.T01 | Amidase                                                                    |
| maker-4-augustus-gene-109.8-mRNA-1  | Japonica | NA       |              |              | OsR498G0408213900.01.T02 | 40S ribosomal protein S27                                                  |
| maker-4-augustus-gene-11.0-mRNA-1   | Japonica | NA       |              | Os04g0186800 | OsR498G0407668300.01.T01 | H(+)/Pi cotransporter                                                      |
| maker-4-augustus-gene-110.34-mRNA-1 | Japonica | NA       |              |              |                          | 40S ribosomal protein S27                                                  |
| maker-4-augustus-gene-110.35-mRNA-1 | Japonica | NA       |              |              | OsR498G0408219300.01.T01 | 40S ribosomal protein S27                                                  |
| maker-4-augustus-gene-110.38-mRNA-1 | Japonica | NA       |              |              | OsR498G0408219900.01.T01 | MAU2 chromatid cohesion factor like                                        |
| maker-4-augustus-gene-118.35-mRNA-1 | Japonica | Indica   |              | Os08g0114300 | OsR498G0408279200.01.T02 | L-gulonolactone oxidase                                                    |
| maker-4-augustus-gene-12.0-mRNA-1   | Japonica | Indica   |              | Os04g0187800 | OsR498G0407673800.01.T01 |                                                                            |
| maker-4-augustus-gene-121.10-mRNA-1 | Japonica | NA       |              |              |                          | B3 domain-containing protein                                               |
| maker-4-augustus-gene-121.4-mRNA-1  | Japonica | NA       |              | Os02g0530900 | OsR498G0203991600.01.T01 |                                                                            |
| maker-4-augustus-gene-123.1-mRNA-1  | Japonica | Indica   | Kinase-TM    | Os04g0366000 | OsR498G0408332800.01.T02 | Calcium binding EGF domain containing protein, expressed                   |
| maker-4-augustus-gene-124.35-mRNA-1 | Japonica | NA       | Kinase-TM    | Os04g0368000 | OsR498G0408337400.01.T01 | Wall-associated receptor kinase 2                                          |
| maker-4-augustus-gene-125.39-mRNA-1 | Japonica | NA       | CC-Kinase-TM |              | OsR498G0408339000.01.T01 | Jacalin-like lectin domain containing protein                              |
| maker-4-augustus-gene-13.33-mRNA-1  | Japonica | NA       |              | Os04g0189400 | OsR498G0407680000.01.T01 | Knot1 domain-containing protein (Fragment)                                 |
| maker-4-augustus-gene-132.0-mRNA-1  | Japonica | NA       |              | Os04g0380500 |                          | DUF1618 domain-containing protein (Fragment)                               |
| maker-4-augustus-gene-138.20-mRNA-1 | Japonica | NA       |              | Os04g0391900 | OsR498G0408442500.01.T01 | 4-sulfomuconolactone hydrolase                                             |
| maker-4-augustus-gene-138.25-mRNA-1 | Japonica | NA       |              |              |                          |                                                                            |
| maker-4-augustus-gene-138.26-mRNA-1 | Japonica | NA       |              | Os04g0392500 |                          | GLTSCR1 domain-containing protein                                          |
| maker-4-augustus-gene-138.30-mRNA-1 | Japonica | NA       |              |              | OsR498G0408443600.01.T01 |                                                                            |

|                                     |          |          |           |              |                          |                                                                            |
|-------------------------------------|----------|----------|-----------|--------------|--------------------------|----------------------------------------------------------------------------|
| maker-4-augustus-gene-139.33-mRNA-1 | Japonica | NA       | Kinase-TM | Os04g0393900 | OsR498G0408448500.01.T01 | Serine/threonine-protein kinase NAK                                        |
| maker-4-augustus-gene-139.36-mRNA-1 | Japonica | NA       |           | Os04g0394100 | OsR498G0408448900.01.T01 | Glycerophosphodiester phosphodiesterase                                    |
| maker-4-augustus-gene-139.37-mRNA-1 | Japonica | NA       |           | Os04g0394100 | OsR498G0408448900.01.T01 | Glycerophosphodiester phosphodiesterase                                    |
| maker-4-augustus-gene-139.49-mRNA-1 | Japonica | NA       |           | Os04g0393300 | OsR498G0408447200.01.T01 | Membrane-anchored ubiquitin-fold protein 4-like                            |
| maker-4-augustus-gene-139.53-mRNA-1 | Japonica | NA       |           | Os04g0394300 | OsR498G0408449400.01.T01 | Zinc finger CCCH domain-containing protein 27                              |
| maker-4-augustus-gene-140.0-mRNA-1  | Japonica | NA       |           | Os04g0394700 | OsR498G0408451300.01.T01 | BAR domain-containing protein                                              |
| maker-4-augustus-gene-140.25-mRNA-1 | Japonica | Japonica |           | Os04g0395466 | OsR498G0306852400.01.T01 | Transposon protein, putative, CACTA, En/Spm sub-class                      |
| maker-4-augustus-gene-140.27-mRNA-1 | Japonica | NA       |           |              | OsR498G0408453600.01.T01 |                                                                            |
| maker-4-augustus-gene-140.29-mRNA-1 | Japonica | NA       |           | Os04g0395600 | OsR498G0408453800.01.T02 | Auxin signaling F-box 2                                                    |
| maker-4-augustus-gene-141.10-mRNA-1 | Japonica | NA       |           | Os04g0395800 | OsR498G0408455300.01.T01 | Tify domain-containing protein                                             |
| maker-4-augustus-gene-141.13-mRNA-1 | Japonica | NA       |           |              | OsR498G0408459500.01.T01 | E3 ubiquitin protein ligase DRIP2                                          |
| maker-4-augustus-gene-141.15-mRNA-1 | Japonica | NA       |           | Os04g0395900 | OsR498G0408455600.01.T01 | Polynucleotide adenyllyltransferase family protein                         |
| maker-4-augustus-gene-142.20-mRNA-1 | Japonica | NA       |           | Os04g0396800 | OsR498G0408461300.01.T01 | Carboxypeptidase                                                           |
| maker-4-augustus-gene-142.25-mRNA-1 | Japonica | NA       |           | Os04g0397000 | OsR498G0408461900.01.T01 | Dolichyl-diphosphooligosaccharide--protein glycosyltransferase subunit DAD |
| maker-4-augustus-gene-142.28-mRNA-1 | Japonica | NA       |           |              | OsR498G0408462300.01.T01 |                                                                            |
| maker-4-augustus-gene-142.29-mRNA-1 | Japonica | NA       |           | Os04g0397700 | OsR498G0408463500.01.T01 | Centromere protein 5                                                       |
| maker-4-augustus-gene-142.34-mRNA-1 | Japonica | Indica   |           | Os08g0538000 | OsR498G0408467900.01.T02 | Diadenosine tetraphosphate synthetase                                      |
| maker-4-augustus-gene-142.38-mRNA-1 | Japonica | Indica   |           | Os12g0230100 | OsR498G0408462200.01.T03 | ATP-dependent Clp protease ATP-binding subunit clpA like CD4B, chloroplas  |
| maker-4-augustus-gene-142.47-mRNA-1 | Japonica | NA       |           | Os04g0397500 | OsR498G0408462600.01.T01 | Trihelix transcription factor ASR3                                         |
| maker-4-augustus-gene-142.49-mRNA-1 | Japonica | Indica   |           | Os04g0397901 | OsR498G0408464800.01.T01 |                                                                            |
| maker-4-augustus-gene-143.0-mRNA-1  | Japonica | NA       |           | Os04g0398500 | OsR498G0408468300.01.T01 | Cytochrome b-c1 complex subunit Rieske, mitochondrial                      |
| maker-4-augustus-gene-143.11-mRNA-1 | Japonica | NA       |           | Os04g0398700 | OsR498G0408469200.01.T01 | Pollen allergen Phl p 11                                                   |
| maker-4-augustus-gene-143.13-mRNA-1 | Japonica | NA       |           |              | OsR498G0408469400.01.T01 | WASH complex subunit strumpellin-like protein                              |
| maker-4-augustus-gene-143.16-mRNA-1 | Japonica | NA       |           | Os04g0398800 | OsR498G0408469600.01.T05 | WASH complex subunit strumpellin-like protein                              |
| maker-4-augustus-gene-143.2-mRNA-1  | Japonica | NA       |           | Os04g0398600 | OsR498G0408468900.01.T02 | Exostosis domain-containing protein                                        |
| maker-4-augustus-gene-143.4-mRNA-1  | Japonica | Indica   |           | Os04g0346100 | OsR498G0408469900.01.T01 | 40S ribosomal protein S27                                                  |
| maker-4-augustus-gene-143.7-mRNA-1  | Japonica | NA       |           | Os04g0399300 | OsR498G0408470900.01.T01 | NUDIX hydrolase domain                                                     |
| maker-4-augustus-gene-144.35-mRNA-1 | Japonica | NA       |           | Os04g0400000 | OsR498G0408473800.01.T01 | Protein PYRICULARIA ORYZAE RESISTANCE 21                                   |
| maker-4-augustus-gene-144.37-mRNA-1 | Japonica | Japonica |           | Os04g0400600 | OsR498G0408475400.01.T01 |                                                                            |
| maker-4-augustus-gene-144.38-mRNA-1 | Japonica | Indica   |           | Os04g0400600 | OsR498G0408475800.01.T01 | HMA domain-containing protein                                              |
| maker-4-augustus-gene-144.43-mRNA-1 | Japonica | Japonica |           | Os04g0400800 | OsR498G0408476600.01.T02 |                                                                            |
| maker-4-augustus-gene-144.45-mRNA-1 | Japonica | Japonica |           | Os04g0401100 | OsR498G0408478200.01.T01 | Protein PYRICULARIA ORYZAE RESISTANCE 21                                   |
| maker-4-augustus-gene-144.47-mRNA-1 | Japonica | NA       |           | Os04g0401300 | OsR498G0408479400.01.T01 | Sucrose nonfermenting 4-like protein                                       |
| maker-4-augustus-gene-144.54-mRNA-1 | Japonica | NA       |           |              |                          | DDE Tnp4 domain-containing protein                                         |
| maker-4-augustus-gene-145.11-mRNA-1 | Japonica | NA       |           | Os04g0402100 | OsR498G0408483600.01.T01 | Calnexin                                                                   |
| maker-4-augustus-gene-145.16-mRNA-1 | Japonica | Japonica |           | Os04g0402500 | OsR498G0408485400.01.T02 | Inhibitor of apoptosis-like protein                                        |
| maker-4-augustus-gene-145.4-mRNA-1  | Japonica | NA       |           |              | OsR498G0408485100.01.T04 | OTU domain-containing protein isoform A                                    |
| maker-4-augustus-gene-145.8-mRNA-1  | Japonica | NA       |           | Os04g0401800 | OsR498G0408482200.01.T03 | DRMBL domain-containing protein                                            |
| maker-4-augustus-gene-15.24-mRNA-1  | Japonica | Indica   |           | Os03g0558600 | OsR498G0407689300.01.T02 |                                                                            |
| maker-4-augustus-gene-155.43-mRNA-1 | Japonica | NA       |           | Os04g0421900 | OsR498G0408565700.01.T01 | Exocyst complex component 2                                                |
| maker-4-augustus-gene-155.54-mRNA-1 | Japonica | NA       |           | Os04g0422000 | OsR498G0408565900.01.T01 | probable plastid-lipid-associated protein 7, chloroplastic                 |
| maker-4-augustus-gene-155.56-mRNA-1 | Japonica | Indica   |           | Os04g0422600 | OsR498G0408567100.01.T01 |                                                                            |
| maker-4-augustus-gene-155.62-mRNA-1 | Japonica | Indica   |           | Os04g0423100 | OsR498G0408568100.01.T01 | 3-hydroxybenzoate 6-hydroxylase (Fragment)                                 |
| maker-4-augustus-gene-155.65-mRNA-1 | Japonica | NA       |           | Os04g0422300 | OsR498G0408566200.01.T01 | Nascent polypeptide-associated complex subunit beta                        |
| maker-4-augustus-gene-155.68-mRNA-1 | Japonica | Japonica |           | Os04g0422700 | OsR498G0408567400.01.T01 | Leucine-rich repeat extensin-like protein 5                                |
| maker-4-augustus-gene-155.71-mRNA-1 | Japonica | NA       |           | Os04g0423400 | OsR498G0408569000.01.T02 | Absciscic stress ripening                                                  |
| maker-4-augustus-gene-155.73-mRNA-1 | Japonica | NA       |           |              |                          | SET domain-containing protein (Fragment)                                   |
| maker-4-augustus-gene-156.11-mRNA-1 | Japonica | NA       |           | Os04g0425100 | OsR498G0408572300.01.T05 | CHD3-type chromatin-remodeling factor PICKLE-like isoform X1               |
| maker-4-augustus-gene-156.14-mRNA-1 | Japonica | Japonica |           | Os04g0423700 | OsR498G0408569400.01.T01 | Sphingomyelin synthetase family protein isoform 1                          |
| maker-4-augustus-gene-158.0-mRNA-1  | Japonica | NA       |           | Os04g0428900 | OsR498G0408582200.01.T01 | COP9 signalosome complex subunit 8                                         |
| maker-4-augustus-gene-159.36-mRNA-1 | Japonica | Japonica |           | Os04g0429100 | OsR498G0408583100.01.T01 | Histone-lysine N-methyltransferase ASHH1                                   |
| maker-4-augustus-gene-159.42-mRNA-1 | Japonica | NA       |           |              | OsR498G0408583500.01.T05 | USP domain-containing protein                                              |
| maker-4-augustus-gene-159.50-mRNA-1 | Japonica | Indica   |           | Os04g0429300 | OsR498G0408583700.01.T01 | BHLH domain-containing protein                                             |
| maker-4-augustus-gene-159.52-mRNA-1 | Japonica | NA       |           | Os04g0429400 | OsR498G0408583900.01.T01 | Transcription factor bHLH95 like                                           |
| maker-4-augustus-gene-159.60-mRNA-1 | Japonica | Indica   | Kinase-TM | Os04g0430000 | OsR498G0408585300.01.T02 | probable serine/threonine-protein kinase At1g01540                         |
| maker-4-augustus-gene-159.64-mRNA-1 | Japonica | NA       |           | Os04g0430100 | OsR498G0408585700.01.T01 | Ribosomal protein S10                                                      |
| maker-4-augustus-gene-159.68-mRNA-1 | Japonica | Indica   | Kinase-TM | Os04g0430400 | OsR498G0408586700.01.T01 | Protein kinase domain-containing protein                                   |
| maker-4-augustus-gene-159.72-mRNA-1 | Japonica | NA       |           | Os04g0429500 | OsR498G0408584200.01.T01 | Cellulose synthase A                                                       |
| maker-4-augustus-gene-159.73-mRNA-1 | Japonica | NA       |           | Os04g0429600 |                          | Cellulose synthase family protein, expressed                               |
| maker-4-augustus-gene-159.90-mRNA-1 | Japonica | NA       |           | Os04g0430200 | OsR498G0408586000.01.T01 | PI-PLC X domain-containing protein                                         |
| maker-4-augustus-gene-16.0-mRNA-1   | Japonica | NA       |           |              | OsR498G0407689900.01.T01 | Methyl-CpG-binding domain-containing protein 13                            |

|                                     |          |          |           |              |                          |                                                              |
|-------------------------------------|----------|----------|-----------|--------------|--------------------------|--------------------------------------------------------------|
| maker-4-augustus-gene-16.4-mRNA-1   | Japonica | NA       |           |              | OsR498G0407689900.01.T01 | MBD domain-containing protein                                |
| maker-4-augustus-gene-160.0-mRNA-1  | Japonica | Japonica |           | Os04g0430600 | OsR498G0408587500.01.T01 | Late embryogenesis abundant protein, LEA-14                  |
| maker-4-augustus-gene-160.11-mRNA-1 | Japonica | NA       | Kinase-TM | Os04g0432000 | OsR498G0408595100.01.T04 | Serine/threonine-protein kinase SAPK7                        |
| maker-4-augustus-gene-160.15-mRNA-1 | Japonica | NA       |           |              |                          | 4-alpha-L-fucosyltransferase                                 |
| maker-4-augustus-gene-160.17-mRNA-1 | Japonica | NA       |           | Os04g0430800 |                          | Thioredoxin M3, chloroplastic                                |
| maker-4-augustus-gene-160.2-mRNA-1  | Japonica | NA       |           |              | OsR498G0408589300.01.T01 | Magnesium transporter                                        |
| maker-4-augustus-gene-160.20-mRNA-1 | Japonica | NA       |           | Os04g0431100 | OsR498G0408590000.01.T01 | GrpE protein homolog                                         |
| maker-4-augustus-gene-160.22-mRNA-1 | Japonica | NA       |           | Os04g0431300 | OsR498G0408592800.01.T01 | Acetyltransferase                                            |
| maker-4-augustus-gene-160.23-mRNA-1 | Japonica | NA       |           | Os04g0431800 | OsR498G0408593400.01.T01 | Brain acid soluble protein 1-like protein                    |
| maker-4-augustus-gene-160.27-mRNA-1 | Japonica | Japonica |           | Os04g0432300 | OsR498G0408597400.01.T03 | DEXH-box ATP-dependent RNA helicase DEXH7 chloroplastic      |
| maker-4-augustus-gene-160.4-mRNA-1  | Japonica | NA       |           |              | OsR498G0408589700.01.T01 |                                                              |
| maker-4-augustus-gene-160.7-mRNA-1  | Japonica | NA       |           | Os04g0431200 | OsR498G0408590100.01.T02 | F-box protein 7                                              |
| maker-4-augustus-gene-161.0-mRNA-1  | Japonica | NA       |           |              | OsR498G0408600900.01.T06 | Etoposide-induced 2.4                                        |
| maker-4-augustus-gene-161.13-mRNA-1 | Japonica | NA       |           |              | OsR498G0408602600.01.T01 |                                                              |
| maker-4-augustus-gene-161.4-mRNA-1  | Japonica | NA       |           | Os04g0432400 | OsR498G0408598000.01.T01 | Alkaline/neutral invertase                                   |
| maker-4-augustus-gene-161.7-mRNA-1  | Japonica | NA       |           | Os04g0432500 | OsR498G0408599000.01.T01 | Protein disulfide isomerase11                                |
| maker-4-augustus-gene-161.9-mRNA-1  | Japonica | NA       |           | Os04g0432900 | OsR498G0408599600.01.T01 | BTB/POZ and MATH domain-containing protein 1                 |
| maker-4-augustus-gene-162.41-mRNA-1 | Japonica | NA       |           |              | OsR498G0408603200.01.T01 | ATP-dependent DNA helicase                                   |
| maker-4-augustus-gene-162.50-mRNA-1 | Japonica | NA       |           |              | OsR498G0408603800.01.T01 | Increased DNA methylation 1                                  |
| maker-4-augustus-gene-162.54-mRNA-1 | Japonica | NA       |           | Os04g0434300 | OsR498G0408604400.01.T01 | Threonylcarbamoyladenine tRNA methyltransferase              |
| maker-4-augustus-gene-162.58-mRNA-1 | Japonica | NA       |           |              | OsR498G0408605800.01.T02 | Kinesin-like protein KIN-7C mitochondrial                    |
| maker-4-augustus-gene-165.0-mRNA-1  | Japonica | Indica   |           | Os04g0439100 | OsR498G0408621300.01.T01 | T-complex protein 11                                         |
| maker-4-augustus-gene-165.11-mRNA-1 | Japonica | NA       |           | Os04g0439900 | OsR498G0408623000.01.T01 | Protein TIC 40 chloroplastic                                 |
| maker-4-augustus-gene-165.4-mRNA-1  | Japonica | Japonica |           | Os04g0439200 | OsR498G0408621500.01.T01 | T-complex protein 11                                         |
| maker-4-augustus-gene-165.6-mRNA-1  | Japonica | Indica   |           | Os02g0556900 | OsR498G0408621800.01.T02 | DDT transcription factor                                     |
| maker-4-augustus-gene-166.34-mRNA-1 | Japonica | NA       |           | Os04g0442000 | OsR498G0408632900.01.T03 | Auxin response factor                                        |
| maker-4-augustus-gene-166.39-mRNA-1 | Japonica | NA       |           | Os04g0442100 | OsR498G0408633300.01.T02 | Smr protein/MutS2 C-terminal                                 |
| maker-4-augustus-gene-166.41-mRNA-1 | Japonica | NA       |           | Os04g0442200 | OsR498G0408633500.01.T04 | Monocarboxylate transporter 12 like                          |
| maker-4-augustus-gene-168.39-mRNA-1 | Japonica | NA       |           | Os04g0444200 | OsR498G0408647100.01.T05 | Calmodulin-binding protein 60 C                              |
| maker-4-augustus-gene-168.77-mRNA-1 | Japonica | NA       |           |              | OsR498G0408644200.01.T03 | COX assembly mitochondrial protein (Fragment)                |
| maker-4-augustus-gene-168.80-mRNA-1 | Japonica | NA       |           |              | OsR498G0408644600.01.T01 | NAC domain-containing protein 12                             |
| maker-4-augustus-gene-168.82-mRNA-1 | Japonica | NA       |           |              | OsR498G0408645400.01.T01 | RuBisCO large subunit-binding protein subunit beta           |
| maker-4-augustus-gene-169.0-mRNA-1  | Japonica | NA       |           | Os04g0444800 | OsR498G0408648900.01.T01 | Ferric reduction oxidase 7 chloroplastic                     |
| maker-4-augustus-gene-169.10-mRNA-1 | Japonica | NA       |           | Os04g0445800 | OsR498G0408651700.01.T01 | U6 snRNA-associated Sm-like protein LSM1                     |
| maker-4-augustus-gene-169.13-mRNA-1 | Japonica | NA       |           | Os04g0446000 | OsR498G0408652100.01.T02 | LURP1-related protein domain containing protein              |
| maker-4-augustus-gene-169.19-mRNA-1 | Japonica | Japonica |           | Os04g0444400 | OsR498G0408647800.01.T03 | Pentatricopeptide repeat-containing protein                  |
| maker-4-augustus-gene-169.2-mRNA-1  | Japonica | NA       |           | Os04g0444900 | OsR498G0408649100.01.T01 | PHD finger protein ALFIN-LIKE 5, N-terminally processed like |
| maker-4-augustus-gene-169.24-mRNA-1 | Japonica | Indica   |           | Os04g0445000 | OsR498G0408649400.01.T01 | Potassium channel SKOR                                       |
| maker-4-augustus-gene-169.27-mRNA-1 | Japonica | NA       |           | Os04g0445200 | OsR498G0408650000.01.T01 | Enzyme of the cupin superfamily                              |
| maker-4-augustus-gene-169.29-mRNA-1 | Japonica | NA       |           | Os04g0445700 | OsR498G0408651600.01.T01 | Beta-ketoacyl-[acyl-carrier-protein] synthase I              |
| maker-4-augustus-gene-169.33-mRNA-1 | Japonica | NA       |           | Os04g0446300 | OsR498G0408653400.01.T01 | Signal peptidase complex, subunit SPC25                      |
| maker-4-augustus-gene-169.34-mRNA-1 | Japonica | NA       |           | Os04g0446300 | OsR498G0408653400.01.T04 | Signal peptidase complex subunit 2                           |
| maker-4-augustus-gene-17.0-mRNA-1   | Japonica | NA       |           |              | OsR498G0407689900.01.T01 | MBD domain-containing protein                                |
| maker-4-augustus-gene-17.15-mRNA-1  | Japonica | NA       |           | Os04g0194500 | OsR498G0407698800.01.T01 | White-brown-complex ABC transporter family                   |
| maker-4-augustus-gene-17.5-mRNA-1   | Japonica | NA       |           |              | OsR498G0407699900.01.T01 |                                                              |
| maker-4-augustus-gene-17.7-mRNA-1   | Japonica | NA       |           | Os04g0195000 | OsR498G0407700300.01.T02 | Vacuolar protein sorting-associated protein 41 homolog       |
| maker-4-augustus-gene-170.0-mRNA-1  | Japonica | NA       |           | Os04g0446500 | OsR498G0408653700.01.T02 | Peptidylprolyl isomerase                                     |
| maker-4-augustus-gene-170.15-mRNA-1 | Japonica | NA       |           | Os04g0447600 | OsR498G0408659900.01.T01 | Non-functional NADPH-dependent codeinone reductase 2         |
| maker-4-augustus-gene-170.19-mRNA-1 | Japonica | Japonica |           | Os04g0447700 | OsR498G0408659900.01.T01 | NAD(P)H-dependent 6'-deoxychalcone synthase                  |
| maker-4-augustus-gene-170.22-mRNA-1 | Japonica | Indica   |           | Os04g0448000 | OsR498G0408661900.01.T01 |                                                              |
| maker-4-augustus-gene-170.24-mRNA-1 | Japonica | NA       |           | Os04g0448200 | OsR498G0408662500.01.T02 |                                                              |
| maker-4-augustus-gene-170.5-mRNA-1  | Japonica | NA       |           | Os04g0446600 |                          |                                                              |
| maker-4-augustus-gene-171.0-mRNA-1  | Japonica | NA       |           | Os04g0448800 | OsR498G0408663900.01.T01 | Mitochondrial phosphate carrier protein like                 |
| maker-4-augustus-gene-171.12-mRNA-1 | Japonica | NA       |           | Os04g0449000 | OsR498G0408664500.01.T02 | Mitochondrial uncoupling protein 3                           |
| maker-4-augustus-gene-171.18-mRNA-1 | Japonica | NA       |           | Os04g0450000 | OsR498G0408668500.01.T01 | Hepatoma-derived growth factor-related protein 2-like        |
| maker-4-augustus-gene-171.20-mRNA-1 | Japonica | NA       |           | Os04g0450100 | OsR498G0408669700.01.T01 | Phospholipase/carboxylhydrolase                              |
| maker-4-augustus-gene-171.24-mRNA-1 | Japonica | Indica   |           | Os04g0450200 | OsR498G0408669900.01.T03 | Pentatricopeptide repeat-containing protein mitochondrial    |
| maker-4-augustus-gene-171.26-mRNA-1 | Japonica | NA       |           | Os04g0450500 | OsR498G0408670900.01.T01 | Nucleic acid-binding                                         |
| maker-4-augustus-gene-171.30-mRNA-1 | Japonica | NA       |           | Os04g0450600 | OsR498G0408671100.01.T01 | Pterin-binding domain-containing protein                     |
| maker-4-augustus-gene-171.32-mRNA-1 | Japonica | NA       |           | Os04g0448600 | OsR498G0408663600.01.T01 | Gamma-glutamylcyclotransferase                               |
| maker-4-augustus-gene-171.36-mRNA-1 | Japonica | NA       |           |              | OsR498G0408663800.01.T01 | F-box protein FBW2                                           |

|                                     |          |          |               |              |                          |                                                                         |
|-------------------------------------|----------|----------|---------------|--------------|--------------------------|-------------------------------------------------------------------------|
| maker-4-augustus-gene-171.38-mRNA-1 | Japonica | NA       |               | Os04g0449100 | OsR498G0408664800.01.T01 | Fucosyltransferase                                                      |
| maker-4-augustus-gene-171.40-mRNA-1 | Japonica | NA       |               | Os04g0449200 | OsR498G0408665000.01.T01 | Fucosyltransferase                                                      |
| maker-4-augustus-gene-171.42-mRNA-1 | Japonica | NA       |               |              | OsR498G0408665200.01.T04 | PPM-type phosphatase domain-containing protein                          |
| maker-4-augustus-gene-171.47-mRNA-1 | Japonica | NA       |               | Os04g0449500 | OsR498G0408665600.01.T01 | Steroid nuclear receptor ligand-binding                                 |
| maker-4-augustus-gene-171.5-mRNA-1  | Japonica | NA       |               | Os04g0448900 | OsR498G0408664300.01.T03 | Zeaxanthin epoxidase, chloroplastic                                     |
| maker-4-augustus-gene-172.46-mRNA-1 | Japonica | NA       |               | Os04g0452100 | OsR498G0408676900.01.T02 | Cryptochrome                                                            |
| maker-4-augustus-gene-172.51-mRNA-1 | Japonica | NA       |               |              | OsR498G0408675800.01.T04 | PPM-type phosphatase domain-containing protein                          |
| maker-4-augustus-gene-172.55-mRNA-1 | Japonica | NA       |               |              | OsR498G0408512800.01.T01 | IQ calmodulin-binding motif family protein, expressed                   |
| maker-4-augustus-gene-172.59-mRNA-1 | Japonica | NA       |               | Os04g0452400 | OsR498G0408677600.01.T01 | USP domain-containing protein                                           |
| maker-4-augustus-gene-173.0-mRNA-1  | Japonica | Japonica |               | Os04g0452500 | OsR498G0408677700.01.T02 | Synaptonemal complex protein 1                                          |
| maker-4-augustus-gene-173.10-mRNA-1 | Japonica | NA       |               | Os04g0453350 | OsR498G0408679700.01.T01 | Sugar transport protein 5                                               |
| maker-4-augustus-gene-173.13-mRNA-1 | Japonica | NA       |               | Os04g0453400 | OsR498G0408680000.01.T01 | Sugar transport protein 5                                               |
| maker-4-augustus-gene-173.4-mRNA-1  | Japonica | NA       |               | Os04g0452600 | OsR498G0408677900.01.T01 | Sugar transport protein 5                                               |
| maker-4-augustus-gene-173.6-mRNA-1  | Japonica | NA       |               | Os04g0452700 | OsR498G0408678300.01.T01 | Sugar transport protein 5                                               |
| maker-4-augustus-gene-173.8-mRNA-1  | Japonica | NA       |               | Os04g0453200 | OsR498G0408679300.01.T01 | Sugar transport protein 5                                               |
| maker-4-augustus-gene-174.0-mRNA-1  | Japonica | NA       |               | Os04g0454200 | OsR498G0408683900.01.T01 | Sugar transport protein 5                                               |
| maker-4-augustus-gene-174.2-mRNA-1  | Japonica | NA       |               |              | OsR498G0408684100.01.T01 |                                                                         |
| maker-4-augustus-gene-175.48-mRNA-1 | Japonica | Indica   |               | Os04g0456200 | OsR498G0408687300.01.T01 | PLAT domain-containing protein 1                                        |
| maker-4-augustus-gene-175.50-mRNA-1 | Japonica | Japonica |               | Os04g0456700 | OsR498G0408687500.01.T01 | PLAT domain-containing protein 3                                        |
| maker-4-augustus-gene-175.56-mRNA-1 | Japonica | Indica   |               | Os04g0457700 | OsR498G0408689900.01.T01 | Epidermal patterning factor                                             |
| maker-4-augustus-gene-175.58-mRNA-1 | Japonica | NA       |               | Os04g0458300 | OsR498G0408691700.01.T02 | Aldose 1-epimerase                                                      |
| maker-4-augustus-gene-175.61-mRNA-1 | Japonica | NA       |               | Os04g0455800 | OsR498G0408686000.01.T01 | Lipoyl synthase, mitochondrial                                          |
| maker-4-augustus-gene-175.63-mRNA-1 | Japonica | NA       |               |              | OsR498G0408686200.01.T01 | Endoplasmic reticulum-Golgi intermediate compartment protein 3          |
| maker-4-augustus-gene-175.70-mRNA-1 | Japonica | NA       |               | Os04g0457000 | OsR498G0408688400.01.T01 | Chlorophyll a-b binding protein, chloroplastic                          |
| maker-4-augustus-gene-175.72-mRNA-1 | Japonica | Indica   |               | Os04g0457200 | OsR498G0408688600.01.T01 | 11-beta-hydroxysteroid dehydrogenase-like 4B                            |
| maker-4-augustus-gene-175.74-mRNA-1 | Japonica | NA       |               |              | OsR498G0408689800.01.T01 | Gamma-glutamyltranspeptidase 1                                          |
| maker-4-augustus-gene-175.77-mRNA-1 | Japonica | NA       | Kinase-LRR-TM | Os04g0457800 | OsR498G0408690200.01.T01 | Non-specific serine/threonine protein kinase                            |
| maker-4-augustus-gene-176.0-mRNA-1  | Japonica | Indica   |               | Os04g0458600 | OsR498G0408692700.01.T01 | Aldose 1-epimerase                                                      |
| maker-4-augustus-gene-176.24-mRNA-1 | Japonica | NA       |               | Os04g0458700 |                          |                                                                         |
| maker-4-augustus-gene-18.0-mRNA-1   | Japonica | NA       |               | Os04g0196200 | OsR498G0407701900.01.T01 | Acetylserotonin O-methyltransferase 1                                   |
| maker-4-augustus-gene-18.2-mRNA-1   | Japonica | Indica   |               | Os04g0196600 | OsR498G0407703600.01.T01 | Putative glycosyltransferase AGO61                                      |
| maker-4-augustus-gene-181.32-mRNA-1 | Japonica | NA       |               | Os04g0470100 | OsR498G0408739900.01.T01 | Ras-related protein Rab-2-B                                             |
| maker-4-augustus-gene-181.46-mRNA-1 | Japonica | NA       |               |              |                          | Small nuclear ribonucleoprotein Sm D1                                   |
| maker-4-augustus-gene-182.43-mRNA-1 | Japonica | NA       |               |              | OsR498G0408741600.01.T01 | Transcription factor MYB80                                              |
| maker-4-augustus-gene-182.46-mRNA-1 | Japonica | Indica   |               | Os04g0470700 | OsR498G0408741800.01.T02 | Amino acid transporter, transmembrane                                   |
| maker-4-augustus-gene-182.47-mRNA-1 | Japonica | Indica   |               | Os04g0470700 | OsR498G0408741800.01.T06 | Amino acid permease 2                                                   |
| maker-4-augustus-gene-182.62-mRNA-1 | Japonica | NA       |               | Os06g0190900 |                          | CAI-1 autoinducer sensor kinase/phosphatase cqsS isoform 1              |
| maker-4-augustus-gene-182.65-mRNA-1 | Japonica | NA       |               | Os04g0471300 | OsR498G0408743600.01.T01 | WPP domain-interacting protein 2                                        |
| maker-4-augustus-gene-182.67-mRNA-1 | Japonica | NA       |               | Os04g0471400 | OsR498G0408744600.01.T03 | Hapless 8                                                               |
| maker-4-augustus-gene-182.69-mRNA-1 | Japonica | NA       |               | Os04g0471700 | OsR498G0408746400.01.T03 | WRKY transcription factor                                               |
| maker-4-augustus-gene-182.73-mRNA-1 | Japonica | NA       |               |              | OsR498G0408747600.01.T01 | FAS1 domain-containing protein                                          |
| maker-4-augustus-gene-183.0-mRNA-1  | Japonica | NA       |               | Os04g0472300 | OsR498G0408748500.01.T02 | Glycerophosphodiester phosphodiesterase                                 |
| maker-4-augustus-gene-183.11-mRNA-1 | Japonica | Japonica |               | Os04g0472700 | OsR498G0408749700.01.T01 |                                                                         |
| maker-4-augustus-gene-183.14-mRNA-1 | Japonica | NA       |               | Os04g0473400 | OsR498G0408753000.01.T01 | 60S ribosomal protein L6                                                |
| maker-4-augustus-gene-183.16-mRNA-1 | Japonica | NA       |               |              | OsR498G0408753200.01.T01 |                                                                         |
| maker-4-augustus-gene-183.3-mRNA-1  | Japonica | NA       |               |              | OsR498G0408749100.01.T02 | RNA binding (RRM/RBD/RNP motifs) family protein                         |
| maker-4-augustus-gene-183.9-mRNA-1  | Japonica | NA       | Kinase-LRR-TM | Os04g0472500 | OsR498G0408749300.01.T01 | Inactive leucine-rich repeat receptor-like protein kinase               |
| maker-4-augustus-gene-184.36-mRNA-1 | Japonica | NA       |               |              | OsR498G0100584200.01.T01 | IF rod domain-containing protein                                        |
| maker-4-augustus-gene-184.39-mRNA-1 | Japonica | NA       |               |              | OsR498G0408758900.01.T01 | BRX domain-containing protein                                           |
| maker-4-augustus-gene-184.42-mRNA-1 | Japonica | Japonica |               | Os04g0473900 | OsR498G0408754200.01.T01 | 4-coumarate--CoA ligase                                                 |
| maker-4-augustus-gene-184.45-mRNA-1 | Japonica | Indica   |               | Os04g0474800 | OsR498G0408754800.01.T01 | Non-cyanogenic beta-glucosidase                                         |
| maker-4-augustus-gene-184.47-mRNA-1 | Japonica | Indica   |               | Os04g0474500 | OsR498G0408754800.01.T03 | 4-hydroxy-7-methoxy-3-oxo-3,4-dihydro-2H-1,4-benzoxazin-2-yl glucosideb |
| maker-4-augustus-gene-184.49-mRNA-1 | Japonica | Japonica |               | Os04g0474500 | OsR498G0408756000.01.T03 | Beta-glucosidase 12                                                     |
| maker-4-augustus-gene-184.50-mRNA-1 | Japonica | Japonica |               | Os04g0474500 | OsR498G0408756000.01.T03 | Beta-glucosidase 12                                                     |
| maker-4-augustus-gene-184.53-mRNA-1 | Japonica | Indica   |               | Os04g0474500 | OsR498G0408756000.01.T03 | Beta-glucosidase 12                                                     |
| maker-4-augustus-gene-184.61-mRNA-1 | Japonica | NA       |               | Os04g0474900 | OsR498G0408757800.01.T03 | 4-hydroxy-7-methoxy-3-oxo-3,4-dihydro-2H-1,4-benzoxazin-2-yl glucosideb |
| maker-4-augustus-gene-184.63-mRNA-1 | Japonica | NA       |               | Os04g0475500 | OsR498G0408759800.01.T01 | protein THYLAKOID ASSEMBLY 8, chloroplastic                             |
| maker-4-augustus-gene-185.0-mRNA-1  | Japonica | NA       |               | Os04g0476000 | OsR498G0408761700.01.T01 | F-box protein isoform A                                                 |
| maker-4-augustus-gene-185.10-mRNA-1 | Japonica | NA       |               |              | OsR498G0408763700.01.T01 | C2 calcium-dependent membrane targeting                                 |
| maker-4-augustus-gene-185.12-mRNA-1 | Japonica | Indica   | CC-LRR        | Os04g0476700 | OsR498G0408763900.01.T01 | Plant intracellular Ras-group-related LRR protein 3                     |
| maker-4-augustus-gene-185.15-mRNA-1 | Japonica | Japonica |               | Os04g0477000 | OsR498G0408764700.01.T04 | NPH3 domain-containing protein (Fragment)                               |

|                                     |          |          |           |              |                          |                                                                            |
|-------------------------------------|----------|----------|-----------|--------------|--------------------------|----------------------------------------------------------------------------|
| maker-4-augustus-gene-185.19-mRNA-1 | Japonica | NA       |           | Os04g0475600 | OsR498G0408760000.01.T01 | 2-oxoglutarate-dependent dioxygenase DAO                                   |
| maker-4-augustus-gene-185.24-mRNA-1 | Japonica | Indica   |           | Os04g0476100 | OsR498G0408762000.01.T01 | Amine oxidase                                                              |
| maker-4-augustus-gene-185.35-mRNA-1 | Japonica | Indica   |           | Os02g0594800 | OsR498G0408765200.01.T02 | NAC domain-containing protein 8                                            |
| maker-4-augustus-gene-185.4-mRNA-1  | Japonica | NA       |           |              | OsR498G0408763100.01.T01 | Ribonuclease H2 subunit B                                                  |
| maker-4-augustus-gene-186.37-mRNA-1 | Japonica | Indica   |           | Os04g0479000 | OsR498G0408766900.01.T02 | Pachytene checkpoint protein 2 like                                        |
| maker-4-augustus-gene-186.41-mRNA-1 | Japonica | NA       |           | Os04g0477500 | OsR498G0408765800.01.T01 | beta-1,4-mannosyl-glycoprotein 4-beta-N-acetylglucosaminyltransferase-like |
| maker-4-augustus-gene-186.44-mRNA-1 | Japonica | NA       |           | Os04g0479100 | OsR498G0408767200.01.T01 | Transglutaminase                                                           |
| maker-4-augustus-gene-186.47-mRNA-1 | Japonica | NA       |           | Os04g0479200 | OsR498G0408767400.01.T01 | Isocitrate dehydrogenase                                                   |
| maker-4-augustus-gene-186.49-mRNA-1 | Japonica | NA       |           | Os04g0479300 | OsR498G0408767400.01.T03 |                                                                            |
| maker-4-augustus-gene-186.52-mRNA-1 | Japonica | NA       |           | Os04g0479500 | OsR498G0408768000.01.T03 | FBD domain-containing protein                                              |
| maker-4-augustus-gene-187.0-mRNA-1  | Japonica | NA       |           | Os04g0479800 | OsR498G0408768100.01.T01 | FBD domain-containing protein                                              |
| maker-4-augustus-gene-187.12-mRNA-1 | Japonica | NA       | LRR-TM    | Os04g0480500 | OsR498G0408770900.01.T01 | Serine/threonine-protein kinase BR1-like protein 2                         |
| maker-4-augustus-gene-187.14-mRNA-1 | Japonica | NA       |           | Os04g0480900 | OsR498G0408772500.01.T02 | Mannan endo-1,4-beta-mannosidase                                           |
| maker-4-augustus-gene-187.18-mRNA-1 | Japonica | Indica   |           | Os04g0480900 | OsR498G0408772900.01.T01 | Mannan endo-1,4-beta-mannosidase                                           |
| maker-4-augustus-gene-187.20-mRNA-1 | Japonica | NA       |           | Os04g0481300 | OsR498G0408773700.01.T01 | 31-kDa RNA binding protein                                                 |
| maker-4-augustus-gene-187.22-mRNA-1 | Japonica | Indica   |           | Os04g0481700 | OsR498G0408776100.01.T02 | p-glycoprotein 11                                                          |
| maker-4-augustus-gene-187.25-mRNA-1 | Japonica | NA       |           | Os04g0480200 | OsR498G0408770000.01.T01 | High-affinity nitrate transporter                                          |
| maker-4-augustus-gene-187.27-mRNA-1 | Japonica | NA       |           | Os04g0480700 | OsR498G0408771400.01.T01 | Cytochrome P450, E-class, group I                                          |
| maker-4-augustus-gene-187.29-mRNA-1 | Japonica | NA       |           | Os04g0480700 | OsR498G0408771800.01.T01 | Cytochrome P450, family 71, subfamily B, polypeptide 37                    |
| maker-4-augustus-gene-187.3-mRNA-1  | Japonica | Indica   |           | Os04g0480100 | OsR498G0408769300.01.T01 | Eukaryotic translation initiation factor 4B                                |
| maker-4-augustus-gene-187.31-mRNA-1 | Japonica | NA       |           | Os04g0481100 | OsR498G0408773400.01.T01 | Galactinol--sucrose galactosyltransferase                                  |
| maker-4-augustus-gene-187.37-mRNA-1 | Japonica | Indica   |           | Os04g0481400 | OsR498G0408774000.01.T01 | Protein-L-isoaspartate(D-aspartate) O-methyltransferase                    |
| maker-4-augustus-gene-187.39-mRNA-1 | Japonica | Indica   |           | Os04g0481500 | OsR498G0408774200.01.T01 | Centromere protein like                                                    |
| maker-4-augustus-gene-187.5-mRNA-1  | Japonica | NA       |           | Os04g0480300 | OsR498G0408770300.01.T01 | SWI/SNF complex subunit SWI3A                                              |
| maker-4-augustus-gene-187.9-mRNA-1  | Japonica | NA       |           | Os04g0480400 | OsR498G0408770500.01.T02 | SWI/SNF complex subunit SWI3A                                              |
| maker-4-augustus-gene-188.16-mRNA-1 | Japonica | NA       |           | Os04g0482000 | OsR498G0408777000.01.T01 | Peptide methionine sulfoxide reductase A2-1                                |
| maker-4-augustus-gene-19.43-mRNA-1  | Japonica | NA       | Kinase-TM | Os04g0197200 | OsR498G0407706500.01.T02 | Cysteine-rich receptor-like protein kinase 6                               |
| maker-4-augustus-gene-19.50-mRNA-1  | Japonica | Indica   | Kinase-TM | Os04g0197200 | OsR498G0407709800.01.T01 | Cysteine-rich receptor-like protein kinase 6                               |
| maker-4-augustus-gene-191.27-mRNA-1 | Japonica | NA       |           | Os04g0489600 | OsR498G0408806900.01.T01 | BHLH domain-containing protein (Fragment)                                  |
| maker-4-augustus-gene-191.30-mRNA-1 | Japonica | NA       |           | Os04g0489800 | OsR498G0408807500.01.T01 | RING-type E3 ubiquitin transferase                                         |
| maker-4-augustus-gene-191.32-mRNA-1 | Japonica | NA       |           |              | OsR498G0408807700.01.T03 | Mitochondrial protoporphyrinogen IX oxidase                                |
| maker-4-augustus-gene-191.39-mRNA-1 | Japonica | NA       | Kinase-TM | Os04g0488700 | OsR498G0408802200.01.T01 | Serine/threonine-protein kinase OX1                                        |
| maker-4-augustus-gene-191.41-mRNA-1 | Japonica | NA       |           | Os04g0489100 | OsR498G0408804800.01.T04 | Serine/threonine-protein kinase OX1                                        |
| maker-4-augustus-gene-192.41-mRNA-1 | Japonica | NA       |           |              | OsR498G0408808900.01.T01 | ankyrin-3 isoform X1                                                       |
| maker-4-augustus-gene-192.44-mRNA-1 | Japonica | Indica   | Kinase    | Os04g0490500 | OsR498G0408809700.01.T02 | Tyrosine-protein kinase                                                    |
| maker-4-augustus-gene-192.48-mRNA-1 | Japonica | Japonica |           | Os04g0490900 | OsR498G0408810900.01.T01 | Amino acid transporter, transmembrane                                      |
| maker-4-augustus-gene-192.56-mRNA-1 | Japonica | NA       |           | Os04g0490400 | OsR498G0408809200.01.T01 | Ribosome-recycling factor, chloroplastic                                   |
| maker-4-augustus-gene-192.59-mRNA-1 | Japonica | Indica   |           | Os04g0490600 | OsR498G0408810000.01.T02 | CMP-sialic acid transporter 4                                              |
| maker-4-augustus-gene-192.66-mRNA-1 | Japonica | NA       |           | Os04g0490800 | OsR498G0408810600.01.T02 | 2-phosphoglycolate phosphatase, eukaryotic                                 |
| maker-4-augustus-gene-192.69-mRNA-1 | Japonica | Japonica |           | Os04g0491200 | OsR498G0408812200.01.T02 | Nitrate transporter 1.2                                                    |
| maker-4-augustus-gene-192.74-mRNA-1 | Japonica | NA       |           | Os04g0491500 | OsR498G0408813800.01.T01 | Nitrate transporter 1.2                                                    |
| maker-4-augustus-gene-192.78-mRNA-1 | Japonica | NA       |           | Os04g0491700 | OsR498G0408814000.01.T01 | Inositol transporter like                                                  |
| maker-4-augustus-gene-193.0-mRNA-1  | Japonica | NA       |           |              |                          | DNA-directed RNA polymerase subunit                                        |
| maker-4-augustus-gene-193.16-mRNA-1 | Japonica | NA       |           | Os04g0492900 | OsR498G0408818300.01.T01 | Putative CRM domain-containing protein, chloroplastic                      |
| maker-4-augustus-gene-193.20-mRNA-1 | Japonica | NA       |           | Os04g0493100 | OsR498G0408820400.01.T04 | Transcription factor bHLH153                                               |
| maker-4-augustus-gene-193.22-mRNA-1 | Japonica | NA       |           | Os04g0493400 | OsR498G0408821800.01.T01 | Chitinase                                                                  |
| maker-4-augustus-gene-193.8-mRNA-1  | Japonica | NA       |           | Os04g0492400 | OsR498G0408817100.01.T04 | S-adenosyl-L-methionine-dependent methyltransferase                        |
| maker-4-augustus-gene-194.0-mRNA-1  | Japonica | NA       |           |              | OsR498G0815948900.01.T01 | Hydroxyproline-rich glycoprotein-like                                      |
| maker-4-augustus-gene-194.10-mRNA-1 | Japonica | Indica   |           | Os01g0611000 | OsR498G0408824300.01.T01 | DUF642 domain-containing protein (Fragment)                                |
| maker-4-augustus-gene-194.19-mRNA-1 | Japonica | NA       |           |              | OsR498G0408826500.01.T01 | Cytochrome b561 and DOMON domain-containing protein                        |
| maker-4-augustus-gene-194.21-mRNA-1 | Japonica | NA       |           | Os04g0494100 | OsR498G0408822600.01.T01 | Chitinase                                                                  |
| maker-4-augustus-gene-194.23-mRNA-1 | Japonica | NA       |           |              |                          | Transcription factor RF2a                                                  |
| maker-4-augustus-gene-194.26-mRNA-1 | Japonica | Indica   |           | Os05g0305700 | OsR498G0408827000.01.T01 | Homeobox protein SIX3-like isoform X2                                      |
| maker-4-augustus-gene-194.29-mRNA-1 | Japonica | NA       |           |              |                          | Transposon protein, putative, Mutator sub-class, expressed                 |
| maker-4-augustus-gene-194.4-mRNA-1  | Japonica | NA       |           | Os04g0494600 | OsR498G0408823500.01.T01 | Allergen Act d 3                                                           |
| maker-4-augustus-gene-194.8-mRNA-1  | Japonica | NA       |           | Os04g0494900 | OsR498G0408824100.01.T01 |                                                                            |
| maker-4-augustus-gene-195.0-mRNA-1  | Japonica | NA       |           | Os04g0495800 | OsR498G0408827100.01.T03 | NLP transcription factor (Fragment)                                        |
| maker-4-augustus-gene-195.10-mRNA-1 | Japonica | Indica   |           | Os02g0607700 | OsR498G0408828200.01.T01 | (+)-neomenthol dehydrogenase                                               |
| maker-4-augustus-gene-195.13-mRNA-1 | Japonica | NA       |           | Os04g0496600 | OsR498G0408829600.01.T02 | CBF1 interacting corepressor                                               |
| maker-4-augustus-gene-195.17-mRNA-1 | Japonica | NA       |           | Os04g0496800 | OsR498G0408830200.01.T02 | Leucine zipper-EF-hand-containing transmembrane protein 1                  |
| maker-4-augustus-gene-195.2-mRNA-1  | Japonica | NA       |           | Os04g0495900 | OsR498G0408827700.01.T01 | Glycerol-3-phosphatase 1                                                   |

|                                     |          |          |           |              |                          |                                                                             |
|-------------------------------------|----------|----------|-----------|--------------|--------------------------|-----------------------------------------------------------------------------|
| maker-4-augustus-gene-195.22-mRNA-1 | Japonica | NA       |           | Os04g0497000 | OsR498G0408830600.01.T01 | NADP-dependent alkenal double bond reductase P1                             |
| maker-4-augustus-gene-195.25-mRNA-1 | Japonica | NA       |           |              | OsR498G0408830800.01.T01 | Endoglucanase                                                               |
| maker-4-augustus-gene-195.27-mRNA-1 | Japonica | Indica   |           | Os04g0497350 | OsR498G0408831600.01.T03 | Ubiquitin-like-conjugating enzyme ATG10                                     |
| maker-4-augustus-gene-195.32-mRNA-1 | Japonica | NA       |           | Os04g0497400 | OsR498G0408831800.01.T01 | 6,7-dimethyl-8-ribityllumazine synthase                                     |
| maker-4-augustus-gene-195.35-mRNA-1 | Japonica | NA       |           | Os04g0497600 | OsR498G0408832200.01.T02 | La protein 1                                                                |
| maker-4-augustus-gene-195.4-mRNA-1  | Japonica | NA       |           | Os04g0496400 | OsR498G0408828900.01.T02 | HIV Tat-specific factor like                                                |
| maker-4-augustus-gene-195.8-mRNA-1  | Japonica | Japonica |           | Os04g0497300 | OsR498G0408831100.01.T01 | Stress-inducible protein                                                    |
| maker-4-augustus-gene-196.42-mRNA-1 | Japonica | NA       |           |              | OsR498G0408832900.01.T03 | VAN3-binding protein isoform X1                                             |
| maker-4-augustus-gene-196.46-mRNA-1 | Japonica | NA       |           | Os04g0498800 | OsR498G0408834700.01.T05 | Cell division control protein B                                             |
| maker-4-augustus-gene-196.54-mRNA-1 | Japonica | Japonica |           | Os04g0499100 | OsR498G0408835700.01.T02 | probable folate-biopterin transporter 2                                     |
| maker-4-augustus-gene-196.58-mRNA-1 | Japonica | Japonica |           | Os04g0499800 | OsR498G0408837100.01.T04 |                                                                             |
| maker-4-augustus-gene-196.60-mRNA-1 | Japonica | NA       |           | Os04g0500300 | OsR498G0408838100.01.T01 | GPI-anchored protein LLG2                                                   |
| maker-4-augustus-gene-196.62-mRNA-1 | Japonica | NA       |           | Os04g0500400 | OsR498G0408838500.01.T01 |                                                                             |
| maker-4-augustus-gene-196.64-mRNA-1 | Japonica | Indica   |           | Os04g0498200 | OsR498G0408833600.01.T01 | Cytochrome c oxidase subunit                                                |
| maker-4-augustus-gene-196.67-mRNA-1 | Japonica | Japonica |           | Os04g0498700 | OsR498G0408834600.01.T01 | Peroxidase                                                                  |
| maker-4-augustus-gene-196.73-mRNA-1 | Japonica | Japonica |           | Os04g0499200 | OsR498G0204286000.01.T01 | Enhancer of rudimentary homolog                                             |
| maker-4-augustus-gene-196.75-mRNA-1 | Japonica | Indica   |           | Os04g0499300 | OsR498G0408836000.01.T02 | eukaryotic translation initiation factor                                    |
| maker-4-augustus-gene-197.39-mRNA-1 | Japonica | NA       |           | Os04g0500700 | OsR498G0408840900.01.T05 | Hydroxycinnamoyl-Coenzyme A shikimate/quinata hydroxycinnamoyltransferase   |
| maker-4-augustus-gene-197.41-mRNA-1 | Japonica | Indica   |           | Os04g0500900 | OsR498G0408841300.01.T01 | Serine/threonine protein phosphatase                                        |
| maker-4-augustus-gene-197.45-mRNA-1 | Japonica | NA       |           | Os04g0501100 | OsR498G0408841700.01.T03 | Magnesium transporter                                                       |
| maker-4-augustus-gene-197.49-mRNA-1 | Japonica | NA       |           |              | OsR498G0408841900.01.T01 | GuaA                                                                        |
| maker-4-augustus-gene-197.52-mRNA-1 | Japonica | NA       |           | Os04g0501700 | OsR498G0408843900.01.T06 | Gamma-tubulin complex component                                             |
| maker-4-augustus-gene-197.58-mRNA-1 | Japonica | NA       |           | Os04g0501800 | OsR498G0408844300.01.T01 | Calmodulin-binding protein isoform 1                                        |
| maker-4-augustus-gene-197.61-mRNA-1 | Japonica | Japonica |           | Os04g0502100 | OsR498G0408845100.01.T01 |                                                                             |
| maker-4-augustus-gene-197.63-mRNA-1 | Japonica | NA       |           | Os04g0502200 | OsR498G0408845300.01.T02 | Trafficking protein particle complex subunit 9                              |
| maker-4-augustus-gene-197.69-mRNA-1 | Japonica | NA       |           | Os04g0501000 | OsR498G0408841600.01.T04 | 50S ribosomal protein L23, chloroplastic                                    |
| maker-4-augustus-gene-197.71-mRNA-1 | Japonica | NA       |           | Os04g0501600 | OsR498G0408843400.01.T01 |                                                                             |
| maker-4-augustus-gene-197.76-mRNA-1 | Japonica | NA       |           |              | OsR498G0408844800.01.T01 | HMA domain-containing protein                                               |
| maker-4-augustus-gene-198.0-mRNA-1  | Japonica | NA       |           | Os04g0502800 | OsR498G0408846900.01.T01 | Nodulin-like domain-containing protein (Fragment)                           |
| maker-4-augustus-gene-198.14-mRNA-1 | Japonica | Indica   |           | Os04g0503800 | OsR498G0408848700.01.T01 | TRAPP 20 K subunit                                                          |
| maker-4-augustus-gene-198.17-mRNA-1 | Japonica | NA       |           |              | OsR498G0408850300.01.T03 | Adenine phosphoribosyltransferase1                                          |
| maker-4-augustus-gene-198.20-mRNA-1 | Japonica | NA       |           |              | OsR498G0408851500.01.T01 | AP2-like ethylene-responsive transcription factor BBM2                      |
| maker-4-augustus-gene-198.23-mRNA-1 | Japonica | Indica   |           | Os04g0386600 | OsR498G0408852300.01.T02 | Phosphoenolpyruvate carboxylase family protein isoform 2                    |
| maker-4-augustus-gene-198.28-mRNA-1 | Japonica | NA       |           |              | OsR498G0408847800.01.T04 | Calcium-dependent protein kinase 5                                          |
| maker-4-augustus-gene-198.3-mRNA-1  | Japonica | NA       |           | Os04g0502900 | OsR498G0408847100.01.T02 | Calcium uptake protein, mitochondrial                                       |
| maker-4-augustus-gene-198.30-mRNA-1 | Japonica | NA       | LRR-TM    | Os04g0503500 | OsR498G0408848000.01.T07 | F-box/LRR-repeat protein 14-like isoform X2                                 |
| maker-4-augustus-gene-198.36-mRNA-1 | Japonica | NA       |           | Os04g0503700 | OsR498G0408848600.01.T02 |                                                                             |
| maker-4-augustus-gene-198.39-mRNA-1 | Japonica | NA       |           |              | OsR498G0408852600.01.T01 | Putative non-LTR retroelement reverse transcriptase                         |
| maker-4-augustus-gene-198.9-mRNA-1  | Japonica | Indica   | Kinase    | Os09g0123300 | OsR498G0408848300.01.T03 | Mitogen-activated protein kinase kinase kinase                              |
| maker-4-augustus-gene-199.0-mRNA-1  | Japonica | NA       |           | Os04g0505000 | OsR498G0408853300.01.T02 | Filament-like plant protein 7                                               |
| maker-4-augustus-gene-199.2-mRNA-1  | Japonica | NA       |           | Os04g0504800 | OsR498G0408852800.01.T03 | Polyadenylate-binding protein (Fragment)                                    |
| maker-4-augustus-gene-199.9-mRNA-1  | Japonica | NA       |           | Os04g0506300 | OsR498G0408859600.01.T02 | Serine incorporator                                                         |
| maker-4-augustus-gene-2.0-mRNA-1    | Japonica | NA       |           | Os04g0171800 | OsR498G0407629800.01.T01 | Isoleucine N-monooxygenase 2-like (Fragment)                                |
| maker-4-augustus-gene-20.0-mRNA-1   | Japonica | NA       |           |              |                          | TTF-type domain-containing protein (Fragment)                               |
| maker-4-augustus-gene-200.36-mRNA-1 | Japonica | NA       |           | Os04g0507700 | OsR498G0408864500.01.T01 | Anther-specific proline-rich protein APG                                    |
| maker-4-augustus-gene-200.38-mRNA-1 | Japonica | NA       |           | Os04g0507900 | OsR498G0408864900.01.T06 | Diphthamide biosynthesis protein 7-like protein (Fragment)                  |
| maker-4-augustus-gene-200.40-mRNA-1 | Japonica | NA       |           | Os04g0508100 |                          | Isocitrate dehydrogenase [NADP]                                             |
| maker-4-augustus-gene-200.42-mRNA-1 | Japonica | NA       |           |              | OsR498G0408865700.01.T01 | Isocitrate dehydrogenase                                                    |
| maker-4-augustus-gene-200.47-mRNA-1 | Japonica | NA       |           | Os04g0506900 | OsR498G0408861800.01.T02 | Phosphatidylinositol N-acetylglucosaminyltransferase subunit P-related      |
| maker-4-augustus-gene-200.50-mRNA-1 | Japonica | NA       |           | Os04g0507000 | OsR498G0408862600.01.T04 | GIY-YIG nuclease superfamily                                                |
| maker-4-augustus-gene-200.54-mRNA-1 | Japonica | NA       |           |              |                          | GIY-YIG nuclease superfamily                                                |
| maker-4-augustus-gene-200.60-mRNA-1 | Japonica | NA       |           |              | OsR498G0408863400.01.T06 | CLIP-associated protein-like                                                |
| maker-4-augustus-gene-200.73-mRNA-1 | Japonica | NA       |           | Os04g0508000 | OsR498G0408865400.01.T01 | Protein trichome birefringence                                              |
| maker-4-augustus-gene-201.35-mRNA-1 | Japonica | Indica   |           | Os04g0508300 | OsR498G0408866100.01.T01 | Glutaredoxin GRX                                                            |
| maker-4-augustus-gene-201.39-mRNA-1 | Japonica | NA       | Kinase-TM |              | OsR498G0408871500.01.T01 | Receptor-like serinethreonine-protein kinase ale2                           |
| maker-4-augustus-gene-202.59-mRNA-1 | Japonica | Indica   |           | Os04g0510500 | OsR498G0408877100.01.T02 | Nuclear transport factor 2 (NTF2) family protein with RNA binding (RRM-RBD) |
| maker-4-augustus-gene-202.71-mRNA-1 | Japonica | NA       |           | Os04g0510600 | OsR498G0408877400.01.T01 | Anaphase-promoting complex subunit like                                     |
| maker-4-augustus-gene-203.13-mRNA-1 | Japonica | NA       |           | Os04g0512400 | OsR498G0408881200.01.T01 | protein BREAST CANCER SUSCEPTIBILITY 1 homolog                              |
| maker-4-augustus-gene-208.54-mRNA-1 | Japonica | NA       |           | Os04g0521800 | OsR498G0408918300.01.T02 | IAA-amino acid hydrolase                                                    |
| maker-4-augustus-gene-208.57-mRNA-1 | Japonica | Indica   |           | Os02g0629800 | OsR498G0408918500.01.T01 | Knot1 domain-containing protein (Fragment)                                  |
| maker-4-augustus-gene-209.24-mRNA-1 | Japonica | Indica   |           | Os04g0525100 | OsR498G0408929200.01.T01 | Glycosyltransferase                                                         |

|                                     |          |          |           |              |                          |                                                                          |
|-------------------------------------|----------|----------|-----------|--------------|--------------------------|--------------------------------------------------------------------------|
| maker-4-augustus-gene-209.27-mRNA-1 | Japonica | NA       |           | Os04g0525700 | OsR498G0408931600.01.T01 | Carboxypeptidase                                                         |
| maker-4-augustus-gene-21.0-mRNA-1   | Japonica | NA       |           |              | OsR498G0407714700.01.T02 | Retrotransposon protein, putative, LINE sub-class                        |
| maker-4-augustus-gene-21.3-mRNA-1   | Japonica | Indica   |           | Os04g0330200 | OsR498G0407712200.01.T01 | Jacalin-type lectin domain-containing protein                            |
| maker-4-augustus-gene-21.5-mRNA-1   | Japonica | NA       |           |              |                          | NB-ARC domain-containing protein                                         |
| maker-4-augustus-gene-21.7-mRNA-1   | Japonica | NA       |           | Os04g0201200 | OsR498G0407716800.01.T01 | Pumilio                                                                  |
| maker-4-augustus-gene-210.41-mRNA-1 | Japonica | NA       |           |              | OsR498G0408932500.01.T01 | Sphingolipid transporter spinster like                                   |
| maker-4-augustus-gene-211.19-mRNA-1 | Japonica | Indica   |           | Os04g0528600 | OsR498G0408943800.01.T01 | Serine/arginine repetitive matrix protein 2-like                         |
| maker-4-augustus-gene-212.49-mRNA-1 | Japonica | NA       |           | Os04g0531900 | OsR498G0408957400.01.T01 | Salutaridine reductase                                                   |
| maker-4-augustus-gene-218.10-mRNA-1 | Japonica | NA       |           | Os04g0542900 | OsR498G0409008100.01.T01 | XendoU domain-containing protein                                         |
| maker-4-augustus-gene-218.15-mRNA-1 | Japonica | NA       |           |              | OsR498G0409008500.01.T01 |                                                                          |
| maker-4-augustus-gene-218.17-mRNA-1 | Japonica | NA       |           | Os04g0543200 | OsR498G0409008700.01.T03 | RNA recognition motif protein 1                                          |
| maker-4-augustus-gene-218.19-mRNA-1 | Japonica | NA       |           | Os04g0542200 | OsR498G0409006200.01.T01 | Probable metal-nicotianamine transporter YSL9                            |
| maker-4-augustus-gene-218.22-mRNA-1 | Japonica | NA       |           |              | OsR498G0409006400.01.T01 |                                                                          |
| maker-4-augustus-gene-218.23-mRNA-1 | Japonica | NA       |           | Os04g0542800 | OsR498G0409008000.01.T03 | Iron-phytosiderophore transporter yellow stripe 1                        |
| maker-4-augustus-gene-218.4-mRNA-1  | Japonica | NA       |           | Os04g0541700 | OsR498G0409002900.01.T01 | Homeodomain-containing transcription factor S1                           |
| maker-4-augustus-gene-218.6-mRNA-1  | Japonica | Indica   |           | Os04g0541900 | OsR498G0409004300.01.T01 | Cysteine-type endopeptidase/ ubiquitin thiolesterase                     |
| maker-4-augustus-gene-219.36-mRNA-1 | Japonica | NA       |           | Os04g0543700 | OsR498G0409009900.01.T05 | Subtilisin-like protease                                                 |
| maker-4-augustus-gene-219.40-mRNA-1 | Japonica | Indica   |           | Os02g0650900 | OsR498G0409010500.01.T01 | Glutamate dehydrogenase                                                  |
| maker-4-augustus-gene-219.45-mRNA-1 | Japonica | Indica   |           | Os04g0543600 | OsR498G0409009600.01.T02 | Cationic amino acid transporter like                                     |
| maker-4-augustus-gene-219.49-mRNA-1 | Japonica | NA       |           | Os04g0544200 | OsR498G0409012200.01.T01 | Cyclin                                                                   |
| maker-4-augustus-gene-219.51-mRNA-1 | Japonica | NA       |           | Os04g0544400 | OsR498G0409012400.01.T01 | Pentatricopeptide repeat-containing protein (Fragment)                   |
| maker-4-augustus-gene-219.54-mRNA-1 | Japonica | NA       |           | Os04g0544500 | OsR498G0409012600.01.T01 | GATA-type domain-containing protein                                      |
| maker-4-augustus-gene-219.57-mRNA-1 | Japonica | NA       |           |              |                          | Mannosyltransferase                                                      |
| maker-4-augustus-gene-219.62-mRNA-1 | Japonica | NA       |           | Os04g0545000 | OsR498G0409013800.01.T01 | WRKY transcription factor 4                                              |
| maker-4-augustus-gene-22.41-mRNA-1  | Japonica | NA       |           | Os04g0203500 | OsR498G0407720100.01.T01 | Senescence-specific cysteine protease SAG39                              |
| maker-4-augustus-gene-22.43-mRNA-1  | Japonica | NA       |           |              |                          | UDP-glucosyltransferase UGT13248                                         |
| maker-4-augustus-gene-22.53-mRNA-1  | Japonica | NA       |           | Os02g0818500 |                          | Neprosin domain-containing protein (Fragment)                            |
| maker-4-augustus-gene-22.56-mRNA-1  | Japonica | Indica   |           | Os04g0206450 | OsR498G0407721000.01.T01 | Glycosyltransferase                                                      |
| maker-4-augustus-gene-22.58-mRNA-1  | Japonica | NA       |           | Os04g0206500 | OsR498G0407721400.01.T01 | Glycosyltransferase                                                      |
| maker-4-augustus-gene-22.60-mRNA-1  | Japonica | NA       |           | Os04g0206600 | OsR498G0407721600.01.T01 | Glycosyltransferase                                                      |
| maker-4-augustus-gene-22.63-mRNA-1  | Japonica | NA       |           |              |                          | F-box domain containing protein, expressed                               |
| maker-4-augustus-gene-220.0-mRNA-1  | Japonica | NA       | Kinase-TM | Os04g0546300 | OsR498G0409018300.01.T01 | Serine/threonine-protein kinase D6PKL1                                   |
| maker-4-augustus-gene-220.13-mRNA-1 | Japonica | Indica   |           | Os04g0545200 | OsR498G0409015800.01.T01 | ELMO domain-containing protein A                                         |
| maker-4-augustus-gene-220.17-mRNA-1 | Japonica | NA       |           | Os04g0545400 | OsR498G0409016800.01.T01 | Phytoecyanin domain-containing protein                                   |
| maker-4-augustus-gene-220.19-mRNA-1 | Japonica | NA       |           | Os04g0545600 | OsR498G0409017200.01.T01 | Phytoecyanin domain-containing protein                                   |
| maker-4-augustus-gene-220.2-mRNA-1  | Japonica | Indica   |           | Os04g0546400 | OsR498G0409018500.01.T03 | Ubiquitin carboxyl-terminal hydrolase                                    |
| maker-4-augustus-gene-220.21-mRNA-1 | Japonica | NA       |           | Os04g0545700 | OsR498G0409017400.01.T01 | HXXXD-type acyl-transferase family protein                               |
| maker-4-augustus-gene-220.23-mRNA-1 | Japonica | NA       |           |              | OsR498G0409018000.01.T01 |                                                                          |
| maker-4-augustus-gene-220.9-mRNA-1  | Japonica | NA       |           | Os04g0545100 | OsR498G0409015600.01.T01 | ELMO domain-containing protein A                                         |
| maker-4-augustus-gene-221.40-mRNA-1 | Japonica | NA       |           | Os04g0547900 | OsR498G0409023700.01.T02 | NUDIX hydrolase domain                                                   |
| maker-4-augustus-gene-221.45-mRNA-1 | Japonica | NA       |           | Os04g0548000 | OsR498G0409023900.01.T01 | DUF862 domain-containing protein                                         |
| maker-4-augustus-gene-221.49-mRNA-1 | Japonica | NA       |           |              |                          | ARM repeat superfamily protein                                           |
| maker-4-augustus-gene-221.58-mRNA-1 | Japonica | NA       |           | Os04g0549400 | OsR498G0409027900.01.T01 |                                                                          |
| maker-4-augustus-gene-221.60-mRNA-1 | Japonica | NA       |           | Os04g0549500 |                          | Probable transcription factor MYB58                                      |
| maker-4-augustus-gene-221.65-mRNA-1 | Japonica | Indica   | Kinase-TM | Os02g0655800 | OsR498G0409024600.01.T01 | Putative leucine-rich repeat receptor-like protein kinase family protein |
| maker-4-augustus-gene-221.67-mRNA-1 | Japonica | NA       |           | Os04g0548700 | OsR498G0409026000.01.T01 | Homeobox-leucine zipper protein HOX1                                     |
| maker-4-augustus-gene-221.69-mRNA-1 | Japonica | NA       |           | Os04g0549300 | OsR498G0409027800.01.T01 | Isoaspartyl peptidase/L-asparaginase 3 subunit beta like                 |
| maker-4-augustus-gene-222.0-mRNA-1  | Japonica | NA       |           | Os04g0549600 | OsR498G0409029500.01.T01 | DnaJ protein like                                                        |
| maker-4-augustus-gene-222.14-mRNA-1 | Japonica | NA       |           | Os04g0550700 | OsR498G0409034600.01.T01 |                                                                          |
| maker-4-augustus-gene-222.17-mRNA-1 | Japonica | Japonica |           | Os04g0550950 | OsR498G0409035200.01.T01 | Putative aquaporin TIP-type                                              |
| maker-4-augustus-gene-222.6-mRNA-1  | Japonica | NA       |           | Os04g0550600 | OsR498G0409034300.01.T01 | Carotenoid cleavage dioxygenase                                          |
| maker-4-augustus-gene-222.8-mRNA-1  | Japonica | NA       |           |              | OsR498G0409033400.01.T03 | E3 ubiquitin protein ligase                                              |
| maker-4-augustus-gene-223.38-mRNA-1 | Japonica | NA       |           | Os04g0551200 | OsR498G0409036300.01.T01 | Malate dehydrogenase                                                     |
| maker-4-augustus-gene-223.40-mRNA-1 | Japonica | NA       |           | Os04g0551500 | OsR498G0409036900.01.T01 | Squamosa promoter-binding protein 6                                      |
| maker-4-augustus-gene-223.48-mRNA-1 | Japonica | NA       |           | Os04g0552000 | OsR498G0409040100.01.T01 | Expansin-like EG45 domain-containing protein                             |
| maker-4-augustus-gene-223.50-mRNA-1 | Japonica | NA       |           | Os04g0552200 | OsR498G0409041300.01.T01 | Expansin B                                                               |
| maker-4-augustus-gene-223.52-mRNA-1 | Japonica | NA       |           |              | OsR498G0409044900.01.T01 | TF-B3 domain-containing protein                                          |
| maker-4-augustus-gene-223.54-mRNA-1 | Japonica | Indica   |           | Os04g0551300 | OsR498G0409036600.01.T04 | O-fucosyltransferase family protein (Fragment)                           |
| maker-4-augustus-gene-223.59-mRNA-1 | Japonica | NA       |           | Os04g0551600 | OsR498G0409038800.01.T01 | Histone deacetylase complex subunit like                                 |
| maker-4-augustus-gene-223.61-mRNA-1 | Japonica | NA       |           |              | OsR498G0409045600.01.T01 | Acyl-acyl carrier protein thioesterase ATL3 chloroplastic                |
| maker-4-augustus-gene-223.63-mRNA-1 | Japonica | NA       |           |              | OsR498G0409046600.01.T02 | Methylketone synthase IIa                                                |

|                                     |          |          |      |              |                          |                                                                           |
|-------------------------------------|----------|----------|------|--------------|--------------------------|---------------------------------------------------------------------------|
| maker-4-augustus-gene-224.34-mRNA-1 | Japonica | NA       |      | Os04g0554200 | OsR498G0409048900.01.T01 | MSP domain-containing protein (Fragment)                                  |
| maker-4-augustus-gene-224.37-mRNA-1 | Japonica | NA       |      | Os04g0555400 | OsR498G0409053900.01.T07 | Nop domain                                                                |
| maker-4-augustus-gene-224.42-mRNA-1 | Japonica | Indica   |      | Os04g0553500 | OsR498G0409047200.01.T02 | Pectinesterase                                                            |
| maker-4-augustus-gene-224.44-mRNA-1 | Japonica | Indica   |      | Os04g0553800 | OsR498G0409048200.01.T01 | Glucuronosyltransferase                                                   |
| maker-4-augustus-gene-224.46-mRNA-1 | Japonica | Indica   |      | Os02g0661100 | OsR498G0409048600.01.T01 | Trehalose 6-phosphate phosphatase                                         |
| maker-4-augustus-gene-224.48-mRNA-1 | Japonica | NA       |      |              | OsR498G0409051800.01.T01 |                                                                           |
| maker-4-augustus-gene-224.50-mRNA-1 | Japonica | NA       |      | Os04g0555300 | OsR498G0409053200.01.T03 | Glycerol-3-phosphate transporter                                          |
| maker-4-augustus-gene-225.0-mRNA-1  | Japonica | Indica   |      | Os04g0556000 | OsR498G0409055700.01.T01 | ATP dependent copper transporter                                          |
| maker-4-augustus-gene-225.18-mRNA-1 | Japonica | NA       |      | Os04g0555700 | OsR498G0409054800.01.T01 | Actin-depolymerizing factor                                               |
| maker-4-augustus-gene-225.20-mRNA-1 | Japonica | NA       |      | Os04g0555800 | OsR498G0409055000.01.T01 | zinc finger CCHC domain-containing protein 9 isoform X2                   |
| maker-4-augustus-gene-225.23-mRNA-1 | Japonica | NA       |      | Os04g0555900 | OsR498G0409055200.01.T02 | Serine racemase                                                           |
| maker-4-augustus-gene-225.27-mRNA-1 | Japonica | NA       |      |              | OsR498G0409059400.01.T01 | NAC domain-containing protein                                             |
| maker-4-augustus-gene-225.28-mRNA-1 | Japonica | NA       |      | Os04g0557200 | OsR498G0409060800.01.T02 | Anthocyanin regulatory R-S protein-like                                   |
| maker-4-augustus-gene-225.3-mRNA-1  | Japonica | NA       |      | Os04g0556300 | OsR498G0409056100.01.T01 | Glutathione peroxidase                                                    |
| maker-4-augustus-gene-225.8-mRNA-1  | Japonica | NA       |      |              | OsR498G0409054400.01.T03 | BEACH domain-containing protein lvsC                                      |
| maker-4-augustus-gene-226.7-mRNA-1  | Japonica | NA       |      | Os04g0557500 | OsR498G0409061000.01.T01 | Anthocyanin regulatory R-S protein-like                                   |
| maker-4-augustus-gene-23.38-mRNA-1  | Japonica | NA       |      | Os04g0208500 | OsR498G0407729800.01.T01 | FBD domain-containing protein                                             |
| maker-4-augustus-gene-231.21-mRNA-1 | Japonica | NA       |      |              |                          | Piwi domain-containing protein                                            |
| maker-4-augustus-gene-233.25-mRNA-1 | Japonica | NA       |      | Os04g0569300 | OsR498G0409100900.01.T01 | RHOMBOLD-like protein (Fragment)                                          |
| maker-4-augustus-gene-233.29-mRNA-1 | Japonica | Japonica |      | Os04g0569400 | OsR498G0409101200.01.T02 | Methyltransferase                                                         |
| maker-4-augustus-gene-233.33-mRNA-1 | Japonica | NA       |      | Os04g0569900 | OsR498G0409102000.01.T01 | IQ-domain 23                                                              |
| maker-4-augustus-gene-233.36-mRNA-1 | Japonica | NA       |      | Os04g0570000 | OsR498G0409102800.01.T01 | Cytochrome P450 family 87 subfamily A polypeptide 2                       |
| maker-4-augustus-gene-234.32-mRNA-1 | Japonica | Japonica |      | Os04g0571200 | OsR498G0409107500.01.T06 | E3 ubiquitin ligase BIG BROTHER                                           |
| maker-4-augustus-gene-234.37-mRNA-1 | Japonica | NA       |      | Os04g0571300 | OsR498G0409108100.01.T03 | RING/U-box superfamily protein                                            |
| maker-4-augustus-gene-234.38-mRNA-1 | Japonica | NA       |      | Os04g0571800 | OsR498G0409111700.01.T01 | Putative RING-H2 finger protein ATL62                                     |
| maker-4-augustus-gene-234.42-mRNA-1 | Japonica | NA       |      | Os04g0570500 | OsR498G0409104200.01.T01 | Cytochrome P450 family protein, expressed                                 |
| maker-4-augustus-gene-234.44-mRNA-1 | Japonica | NA       |      | Os04g0570600 | OsR498G0409105000.01.T02 | Cytochrome P450 family 87 subfamily A polypeptide 2                       |
| maker-4-augustus-gene-234.50-mRNA-1 | Japonica | NA       |      | Os04g0570800 | OsR498G0409105200.01.T02 | Methyltransferase                                                         |
| maker-4-augustus-gene-235.0-mRNA-1  | Japonica | NA       |      |              | OsR498G0409115500.01.T01 |                                                                           |
| maker-4-augustus-gene-235.2-mRNA-1  | Japonica | NA       |      |              | OsR498G0409115900.01.T08 | DNA-directed RNA polymerase subunit                                       |
| maker-4-augustus-gene-235.22-mRNA-1 | Japonica | NA       |      |              | OsR498G0409116500.01.T05 |                                                                           |
| maker-4-augustus-gene-235.24-mRNA-1 | Japonica | Japonica |      | Os04g0572700 | OsR498G0204522900.01.T02 | Zinc finger CCCH domain-containing protein 48                             |
| maker-4-augustus-gene-235.26-mRNA-1 | Japonica | NA       |      | Os04g0573000 | OsR498G0409117500.01.T03 | SPX domain-containing membrane protein                                    |
| maker-4-augustus-gene-235.3-mRNA-1  | Japonica | NA       |      |              | OsR498G0409115900.01.T02 | DNA-directed RNA polymerase subunit                                       |
| maker-4-augustus-gene-235.31-mRNA-1 | Japonica | NA       |      | Os04g0573100 | OsR498G0409117700.01.T01 | (R)-mandelonitrile lyase                                                  |
| maker-4-augustus-gene-235.33-mRNA-1 | Japonica | NA       | CCSD | Os04g0573200 | OsR498G0409117900.01.T03 | Putative superoxide dismutase, copper/zinc binding domain, heavy metal-as |
| maker-4-augustus-gene-235.38-mRNA-1 | Japonica | NA       |      | Os04g0573900 | OsR498G0409119100.01.T01 | Cytochrome P450 family 704 subfamily A polypeptide 2                      |
| maker-4-augustus-gene-236.0-mRNA-1  | Japonica | Indica   |      | Os04g0574500 | OsR498G0409122100.01.T01 | Growth-regulating factor                                                  |
| maker-4-augustus-gene-236.3-mRNA-1  | Japonica | NA       |      |              |                          | ATP-dependent DNA helicase HFM1/MER3                                      |
| maker-4-augustus-gene-236.8-mRNA-1  | Japonica | Indica   |      | Os04g0574800 | OsR498G0409122800.01.T01 | 4-hydroxy-tetrahydrodipicolinate synthase                                 |
| maker-4-augustus-gene-237.31-mRNA-1 | Japonica | NA       |      | Os04g0576500 | OsR498G0409125200.01.T02 |                                                                           |
| maker-4-augustus-gene-237.34-mRNA-1 | Japonica | NA       |      | Os04g0576700 | OsR498G0409127700.01.T03 |                                                                           |
| maker-4-augustus-gene-238.0-mRNA-1  | Japonica | NA       |      | Os04g0577200 | OsR498G0409130700.01.T01 | Rho GTPase-activating protein gacA                                        |
| maker-4-augustus-gene-238.11-mRNA-1 | Japonica | NA       |      |              | OsR498G0409134300.01.T01 | Aldehyde oxygenase (deformylating)                                        |
| maker-4-augustus-gene-238.16-mRNA-1 | Japonica | NA       |      | Os04g0578700 | OsR498G0409136500.01.T03 | Mechanosensitive ion channel protein 1 mitochondrial                      |
| maker-4-augustus-gene-238.20-mRNA-1 | Japonica | NA       |      |              | OsR498G0409137100.01.T01 | GRF-type domain-containing protein (Fragment)                             |
| maker-4-augustus-gene-238.22-mRNA-1 | Japonica | NA       |      | Os04g0577500 | OsR498G0409131600.01.T03 | Putative metal-dependent hydrolase YabD                                   |
| maker-4-augustus-gene-238.25-mRNA-1 | Japonica | NA       |      | Os04g0577800 | OsR498G0409132600.01.T01 | Protein FATTY ACID EXPORT 4 chloroplastic                                 |
| maker-4-augustus-gene-238.28-mRNA-1 | Japonica | NA       |      | Os04g0578000 | OsR498G0409132800.01.T01 | 1-aminocyclopropane-1-carboxylic acid synthase                            |
| maker-4-augustus-gene-238.3-mRNA-1  | Japonica | Japonica |      | Os04g0577300 | OsR498G0409131100.01.T01 | GDSL esterase/lipase                                                      |
| maker-4-augustus-gene-238.30-mRNA-1 | Japonica | Indica   |      | Os04g0578600 | OsR498G0409136200.01.T03 | Putative ferric-chelate reductase (NADH)                                  |
| maker-4-augustus-gene-238.34-mRNA-1 | Japonica | NA       |      | Os04g0578800 | OsR498G0409136800.01.T01 | Putative DUF604-domain containing/glycosyltransferase-related family prot |
| maker-4-augustus-gene-238.6-mRNA-1  | Japonica | Indica   |      | Os04g0578200 | OsR498G0409133900.01.T04 | RNA-directed RNA polymerase L (Fragment)                                  |
| maker-4-augustus-gene-239.0-mRNA-1  | Japonica | Indica   |      | Os04g0579700 | OsR498G0409141300.01.T01 | BTB/POZ domain-containing protein At1g63850                               |
| maker-4-augustus-gene-239.6-mRNA-1  | Japonica | Indica   |      | Os04g0580400 | OsR498G0409144200.01.T01 | SUMO-conjugating enzyme like                                              |
| maker-4-augustus-gene-24.25-mRNA-1  | Japonica | NA       |      |              | OsR498G0407736700.01.T03 |                                                                           |
| maker-4-augustus-gene-24.27-mRNA-1  | Japonica | NA       |      |              |                          | Multidrug resistance-associated protein 4 isoform 2                       |
| maker-4-augustus-gene-24.30-mRNA-1  | Japonica | NA       |      | Os04g0209300 | OsR498G0407734600.01.T02 | ABC transporter C family member 4                                         |
| maker-4-augustus-gene-240.0-mRNA-1  | Japonica | NA       |      | Os04g0580700 | OsR498G0409145300.01.T05 | MADS box transcription factor                                             |
| maker-4-augustus-gene-240.11-mRNA-1 | Japonica | Japonica |      | Os04g0581300 | OsR498G0204538000.01.T01 | Mitochondrial import inner membrane translocase subunit                   |
| maker-4-augustus-gene-240.5-mRNA-1  | Japonica | Japonica |      | Os04g0581000 | OsR498G0409147310.01.T01 | Fe2OG dioxygenase domain-containing protein (Fragment)                    |



|                                     |          |          |           |              |                          |                                                                                             |
|-------------------------------------|----------|----------|-----------|--------------|--------------------------|---------------------------------------------------------------------------------------------|
| maker-4-augustus-gene-240.9-mRNA-1  | Japonica | NA       |           | Os04g0581100 | OsR498G0409147600.01.T03 | Oxoglutarate/iron-dependent dioxygenase                                                     |
| maker-4-augustus-gene-241.38-mRNA-1 | Japonica | NA       |           |              |                          | Putative far-red impaired response protein                                                  |
| maker-4-augustus-gene-241.41-mRNA-1 | Japonica | NA       |           | Os04g0583500 | OsR498G0409162700.01.T01 | Expansin                                                                                    |
| maker-4-augustus-gene-241.44-mRNA-1 | Japonica | NA       |           | Os04g0583700 | OsR498G0409163700.01.T06 | FYVE-type domain-containing protein                                                         |
| maker-4-augustus-gene-241.45-mRNA-1 | Japonica | NA       |           | Os04g0583800 |                          | glycine-rich RNA-binding protein 3, mitochondrial isoform X1                                |
| maker-4-augustus-gene-241.58-mRNA-1 | Japonica | NA       |           | Os04g0581800 | OsR498G0409155200.01.T01 | HMA domain-containing protein (Fragment)                                                    |
| maker-4-augustus-gene-241.60-mRNA-1 | Japonica | NA       |           | Os04g0582000 |                          | p-loop containing nucleoside triphosphate hydrolase superfamily protein                     |
| maker-4-augustus-gene-241.63-mRNA-1 | Japonica | Japonica |           | Os04g0582600 | OsR498G0409156200.01.T02 | p-loop containing nucleoside triphosphate hydrolase superfamily protein                     |
| maker-4-augustus-gene-241.66-mRNA-1 | Japonica | NA       |           | Os04g0582700 |                          |                                                                                             |
| maker-4-augustus-gene-241.68-mRNA-1 | Japonica | NA       |           |              |                          | RecBCD enzyme subunit RecB, P-loop containing nucleoside triphosphate hydrolase             |
| maker-4-augustus-gene-241.72-mRNA-1 | Japonica | NA       |           | Os04g0582900 | OsR498G0409160000.01.T01 | UvrD-like Helicase, ATP-binding domain, P-loop containing nucleoside triphosphate hydrolase |
| maker-4-augustus-gene-241.74-mRNA-1 | Japonica | NA       |           | Os04g0583200 | OsR498G0409161000.01.T02 |                                                                                             |
| maker-4-augustus-gene-241.76-mRNA-1 | Japonica | NA       |           | Os03g0365200 | OsR498G0306004300.01.T01 | Ulp1 protease family, C-terminal catalytic domain containing protein                        |
| maker-4-augustus-gene-242.0-mRNA-1  | Japonica | NA       |           |              | OsR498G0409166100.01.T02 | RING-type E3 ubiquitin transferase                                                          |
| maker-4-augustus-gene-242.11-mRNA-1 | Japonica | NA       |           | Os04g0584800 | OsR498G0409167300.01.T01 | Trigalactosyldiacylglycerol 1 isoform 1                                                     |
| maker-4-augustus-gene-242.14-mRNA-1 | Japonica | NA       |           | Os04g0583900 | OsR498G0409164400.01.T02 | HTH myb-type domain-containing protein                                                      |
| maker-4-augustus-gene-242.17-mRNA-1 | Japonica | Indica   | Kinase-TM | Os04g0584050 | OsR498G0409164800.01.T01 | Clade XII lectin receptor kinase                                                            |
| maker-4-augustus-gene-242.19-mRNA-1 | Japonica | Indica   |           | Os02g0685600 | OsR498G0409165000.01.T02 | Protein-serine/threonine phosphatase                                                        |
| maker-4-augustus-gene-242.21-mRNA-1 | Japonica | NA       |           | Os04g0584900 | OsR498G0409167600.01.T01 | Multiple chloroplast division site                                                          |
| maker-4-augustus-gene-242.24-mRNA-1 | Japonica | NA       |           | Os04g0585100 | OsR498G0409169200.01.T02 | DHHC domain-containing protein                                                              |
| maker-4-augustus-gene-242.30-mRNA-1 | Japonica | NA       |           |              | OsR498G0409169400.01.T03 | Glutamate receptor                                                                          |
| maker-4-augustus-gene-242.35-mRNA-1 | Japonica | NA       |           |              | OsR498G0409169600.01.T04 | Nucleolar complex protein 4                                                                 |
| maker-4-augustus-gene-242.4-mRNA-1  | Japonica | Indica   | Kinase-TM | Os04g0584600 | OsR498G0409166900.01.T02 | Calcium-dependent protein kinase                                                            |
| maker-4-augustus-gene-242.41-mRNA-1 | Japonica | Indica   |           | Os04g0585400 | OsR498G0409169800.01.T01 | Glycosyltransferase                                                                         |
| maker-4-augustus-gene-242.45-mRNA-1 | Japonica | NA       |           | Os04g0585600 | OsR498G0409170000.01.T01 | Kinesin motor domain-containing protein                                                     |
| maker-4-augustus-gene-242.47-mRNA-1 | Japonica | NA       |           | Os04g0585700 | OsR498G0409170200.01.T02 | FLZ-type domain-containing protein (Fragment)                                               |
| maker-4-augustus-gene-243.46-mRNA-1 | Japonica | NA       |           | Os04g0587300 | OsR498G0409177900.01.T01 | probable purine permease 11                                                                 |
| maker-4-augustus-gene-243.48-mRNA-1 | Japonica | NA       |           | Os04g0587400 | OsR498G0409178100.01.T01 | Purine permease                                                                             |
| maker-4-augustus-gene-243.50-mRNA-1 | Japonica | Indica   |           | Os04g0585900 | OsR498G0409171800.01.T01 | FLZ-type domain-containing protein (Fragment)                                               |
| maker-4-augustus-gene-243.52-mRNA-1 | Japonica | NA       |           | Os04g0586000 | OsR498G0409172200.01.T01 | FLZ-type domain-containing protein (Fragment)                                               |
| maker-4-augustus-gene-244.11-mRNA-1 | Japonica | NA       |           | Os04g0588700 | OsR498G0409182300.01.T01 | ABC transporter C family member 9 like                                                      |
| maker-4-augustus-gene-244.15-mRNA-1 | Japonica | NA       |           | Os04g0589200 | OsR498G0409183700.01.T02 |                                                                                             |
| maker-4-augustus-gene-244.18-mRNA-1 | Japonica | NA       |           | Os04g0589600 | OsR498G0409185700.01.T01 |                                                                                             |
| maker-4-augustus-gene-244.21-mRNA-1 | Japonica | NA       |           | Os04g0590100 | OsR498G0409187300.01.T01 | Nucleolar protein 58-like                                                                   |
| maker-4-augustus-gene-244.25-mRNA-1 | Japonica | NA       |           |              | OsR498G0409183400.01.T01 | SRR1 domain-containing protein                                                              |
| maker-4-augustus-gene-244.27-mRNA-1 | Japonica | NA       |           | Os04g0589900 | OsR498G0409186400.01.T04 | AT-hook motif nuclear-localized protein (Fragment)                                          |
| maker-4-augustus-gene-244.7-mRNA-1  | Japonica | NA       | CC-NBS-TM |              | OsR498G0409181900.01.T01 | Multidrug resistance-associated protein/mitoxantrone resistance protein, A                  |
| maker-4-augustus-gene-245.2-mRNA-1  | Japonica | NA       |           |              | OsR498G0409190300.01.T01 | Putative basic-helix-loop-helix transcription factor                                        |
| maker-4-augustus-gene-245.5-mRNA-1  | Japonica | NA       |           | Os04g0591000 | OsR498G0409190600.01.T02 | 29 kDa ribonucleoprotein A, chloroplastic                                                   |
| maker-4-augustus-gene-245.8-mRNA-1  | Japonica | NA       |           | Os04g0591100 | OsR498G0409191200.01.T01 | PLATZ transcription factor                                                                  |
| maker-4-augustus-gene-246.51-mRNA-1 | Japonica | NA       |           | Os04g0592400 | OsR498G0409196100.01.T01 | Putative WEB family protein chloroplastic                                                   |
| maker-4-augustus-gene-246.53-mRNA-1 | Japonica | NA       |           | Os04g0593400 | OsR498G0409198500.01.T01 | S-norcochloraurine synthase                                                                 |
| maker-4-augustus-gene-246.55-mRNA-1 | Japonica | NA       |           | Os04g0593500 | OsR498G0409198700.01.T01 | S-norcochloraurine synthase                                                                 |
| maker-4-augustus-gene-246.61-mRNA-1 | Japonica | NA       |           | Os04g0593700 | OsR498G0409199100.01.T01 | E3 ubiquitin-protein ligase RNF14                                                           |
| maker-4-augustus-gene-246.65-mRNA-1 | Japonica | Japonica |           | Os04g0593800 | OsR498G0409199100.01.T01 | RBR-type E3 ubiquitin transferase                                                           |
| maker-4-augustus-gene-246.67-mRNA-1 | Japonica | Indica   |           | Os04g0592500 | OsR498G0409196400.01.T02 | Phosphoenolpyruvate carboxykinase (ATP)                                                     |
| maker-4-augustus-gene-246.72-mRNA-1 | Japonica | Japonica |           | Os04g0592600 | OsR498G0409196800.01.T01 | SNARE associated Golgi protein family                                                       |
| maker-4-augustus-gene-246.76-mRNA-1 | Japonica | NA       |           | Os04g0592700 | OsR498G0409197600.01.T02 | Transducin beta-like protein 3 isoform A                                                    |
| maker-4-augustus-gene-246.81-mRNA-1 | Japonica | Indica   |           | Os04g0593200 | OsR498G0409198400.01.T01 | Transcription factor MYB102                                                                 |
| maker-4-augustus-gene-246.83-mRNA-1 | Japonica | NA       |           |              | OsR498G0409199800.01.T01 |                                                                                             |
| maker-4-augustus-gene-246.85-mRNA-1 | Japonica | Indica   |           | Os04g0594000 | OsR498G0409200000.01.T02 | RBR-type E3 ubiquitin transferase                                                           |
| maker-4-augustus-gene-246.90-mRNA-1 | Japonica | NA       |           | Os04g0594100 | OsR498G0409200600.01.T01 | Transcription factor MYB63                                                                  |
| maker-4-augustus-gene-247.36-mRNA-1 | Japonica | NA       |           | Os04g0594400 | OsR498G0409203000.01.T01 | Binding partner of ACD11 1                                                                  |
| maker-4-augustus-gene-247.40-mRNA-1 | Japonica | NA       |           | Os04g0594500 | OsR498G0409203400.01.T01 | Pectate lyase                                                                               |
| maker-4-augustus-gene-247.42-mRNA-1 | Japonica | NA       |           |              |                          |                                                                                             |
| maker-4-augustus-gene-247.44-mRNA-1 | Japonica | NA       |           | Os04g0595100 | OsR498G0409205000.01.T01 | UV-B-induced protein chloroplastic                                                          |
| maker-4-augustus-gene-247.48-mRNA-1 | Japonica | NA       |           | Os04g0595200 | OsR498G0409205200.01.T01 | Tr-type G domain-containing protein                                                         |
| maker-4-augustus-gene-247.53-mRNA-1 | Japonica | Indica   |           | Os04g0595300 | OsR498G0100054400.01.T01 | Tr-type G domain-containing protein                                                         |
| maker-4-augustus-gene-247.60-mRNA-1 | Japonica | NA       |           | Os04g0595700 | OsR498G0409206600.01.T01 | Phosphoribulokinase                                                                         |
| maker-4-augustus-gene-247.62-mRNA-1 | Japonica | NA       |           | Os04g0595800 | OsR498G0409206800.01.T01 | Secretory carrier-associated membrane protein 6                                             |
| maker-4-augustus-gene-248.29-mRNA-1 | Japonica | NA       |           | Os04g0597400 | OsR498G0409209500.01.T01 | Peptide transporter PTR2                                                                    |

|                                     |          |          |           |              |                          |                                                                           |
|-------------------------------------|----------|----------|-----------|--------------|--------------------------|---------------------------------------------------------------------------|
| maker-4-augustus-gene-248.40-mRNA-1 | Japonica | NA       | Kinase-TM | Os04g0598600 |                          | Wall-associated kinase                                                    |
| maker-4-augustus-gene-248.42-mRNA-1 | Japonica | NA       | Kinase-TM | Os04g0598800 | OsR498G0409215700.01.T01 | Wall-associated receptor kinase-like 22 (Fragment)                        |
| maker-4-augustus-gene-248.45-mRNA-1 | Japonica | NA       |           | Os04g0598000 | OsR498G0409211600.01.T01 | Hydrogen peroxide induced protein 1                                       |
| maker-4-augustus-gene-248.48-mRNA-1 | Japonica | NA       |           | Os04g0598300 | OsR498G0409213000.01.T01 | Probable transcription factor FL                                          |
| maker-4-augustus-gene-248.50-mRNA-1 | Japonica | NA       | Kinase-TM | Os04g0599000 | OsR498G0409216600.01.T02 | Wall-associated kinase                                                    |
| maker-4-augustus-gene-249.0-mRNA-1  | Japonica | NA       |           | Os04g0599400 | OsR498G0409217700.01.T01 | Phospholipid scramblase                                                   |
| maker-4-augustus-gene-249.14-mRNA-1 | Japonica | Indica   |           | Os04g0599800 | OsR498G0409218900.01.T01 | Cell division cycle protein 20                                            |
| maker-4-augustus-gene-249.18-mRNA-1 | Japonica | NA       |           | Os04g0599900 | OsR498G0409219300.01.T01 | Clathrin interactor EPSIN 1                                               |
| maker-4-augustus-gene-249.23-mRNA-1 | Japonica | Indica   |           | Os02g0700300 | OsR498G0409220100.01.T02 | Myb family transcription factor APL                                       |
| maker-4-augustus-gene-249.26-mRNA-1 | Japonica | NA       |           |              | OsR498G0409216800.01.T01 | PWWP domain                                                               |
| maker-4-augustus-gene-249.28-mRNA-1 | Japonica | NA       |           | Os04g0599300 | OsR498G0409217400.01.T02 | BHLH domain-containing protein                                            |
| maker-4-augustus-gene-249.30-mRNA-1 | Japonica | NA       |           | Os04g0600100 |                          | Potassium voltage-gated channel subfamily H member 3 like                 |
| maker-4-augustus-gene-249.32-mRNA-1 | Japonica | NA       |           | Os04g0600200 | OsR498G0409220400.01.T05 | Ubiquinol oxidase                                                         |
| maker-4-augustus-gene-249.36-mRNA-1 | Japonica | NA       |           | Os04g0600300 | OsR498G0409220600.01.T01 | Ubiquinol oxidase                                                         |
| maker-4-augustus-gene-249.41-mRNA-1 | Japonica | Indica   |           | Os02g0700700 | OsR498G0409221200.01.T03 | Protein BREVIS RADIX                                                      |
| maker-4-augustus-gene-249.44-mRNA-1 | Japonica | NA       |           |              | OsR498G0409221600.01.T03 | GPCR-type G protein 2                                                     |
| maker-4-augustus-gene-249.50-mRNA-1 | Japonica | Indica   |           | Os02g0701300 | OsR498G0409222200.01.T03 | Growth-regulating factor                                                  |
| maker-4-augustus-gene-249.7-mRNA-1  | Japonica | NA       |           |              |                          | UvrD-helicase domain-containing protein (Fragment)                        |
| maker-4-augustus-gene-25.0-mRNA-1   | Japonica | NA       |           |              |                          | NAC domain-containing protein                                             |
| maker-4-augustus-gene-25.3-mRNA-1   | Japonica | NA       |           |              | OsR498G0407745900.01.T01 | Vps54 domain-containing protein (Fragment)                                |
| maker-4-augustus-gene-25.9-mRNA-1   | Japonica | NA       |           | Os04g0212200 | OsR498G0407746300.01.T01 | Two-component response regulator ORR42                                    |
| maker-4-augustus-gene-250.0-mRNA-1  | Japonica | Indica   |           | Os04g0602000 | OsR498G0409223900.01.T01 |                                                                           |
| maker-4-augustus-gene-250.19-mRNA-1 | Japonica | NA       |           | Os04g0601400 | OsR498G0409223600.01.T03 | EF-hand domain-containing protein (Fragment)                              |
| maker-4-augustus-gene-250.22-mRNA-1 | Japonica | Japonica |           | Os04g0601500 | OsR498G0409223800.01.T02 | EF-hand domain-containing protein (Fragment)                              |
| maker-4-augustus-gene-250.26-mRNA-1 | Japonica | NA       |           | Os04g0601700 | OsR498G0409224400.01.T03 | V-type proton ATPase subunit G                                            |
| maker-4-augustus-gene-250.28-mRNA-1 | Japonica | Indica   |           | Os04g0602200 | OsR498G0409226200.01.T01 | Spermidine-binding periplasmic protein SpuE                               |
| maker-4-augustus-gene-250.3-mRNA-1  | Japonica | Indica   |           | Os06g0116600 | OsR498G0409224500.01.T01 | Multiple organellar RNA editing factor 2 chloroplastic                    |
| maker-4-augustus-gene-250.7-mRNA-1  | Japonica | Japonica |           | Os04g0602000 | OsR498G0409223900.01.T01 | Multiple organellar RNA editing factor 2 chloroplastic                    |
| maker-4-augustus-gene-250.9-mRNA-1  | Japonica | NA       |           | Os04g0602100 | OsR498G0409225900.01.T01 | Thylakoid luminal 29 kDa protein chloroplastic                            |
| maker-4-augustus-gene-251.54-mRNA-1 | Japonica | NA       |           | Os04g0604000 | OsR498G0409230400.01.T02 | HP domain-containing protein (Fragment)                                   |
| maker-4-augustus-gene-251.58-mRNA-1 | Japonica | NA       |           | Os04g0604200 | OsR498G0409230600.01.T01 | Xyloglucan endotransglucosylase/hydrolase                                 |
| maker-4-augustus-gene-251.61-mRNA-1 | Japonica | NA       |           | Os04g0604300 | OsR498G0409231200.01.T01 | Xyloglucan endotransglucosylase/hydrolase                                 |
| maker-4-augustus-gene-251.66-mRNA-1 | Japonica | Japonica |           | Os04g0604600 | OsR498G0409232200.01.T02 |                                                                           |
| maker-4-augustus-gene-252.9-mRNA-1  | Japonica | NA       |           | Os04g0605500 | OsR498G0409237000.01.T02 | Calcium-transporting ATPase 9 plasma membrane-type                        |
| maker-4-augustus-gene-253.0-mRNA-1  | Japonica | NA       |           | Os04g0606800 | OsR498G0409242100.01.T01 | Putative peptide transport permease protein Mb1314c                       |
| maker-4-augustus-gene-253.13-mRNA-1 | Japonica | NA       |           |              | OsR498G0409240600.01.T01 | DNA ligase IV                                                             |
| maker-4-augustus-gene-253.18-mRNA-1 | Japonica | NA       |           | Os04g0606500 | OsR498G0409241000.01.T01 | Ubiquitin-specific protease family C19-related protein                    |
| maker-4-augustus-gene-253.23-mRNA-1 | Japonica | NA       |           | Os04g0606700 | OsR498G0409242000.01.T01 |                                                                           |
| maker-4-augustus-gene-253.27-mRNA-1 | Japonica | Indica   |           | Os04g0606900 | OsR498G0409242400.01.T03 | Putative RNA methyltransferase                                            |
| maker-4-augustus-gene-253.29-mRNA-1 | Japonica | NA       |           | Os04g0607000 | OsR498G0409242600.01.T01 | probable plastid-lipid-associated protein 8, chloroplastic                |
| maker-4-augustus-gene-253.33-mRNA-1 | Japonica | Indica   |           | Os08g0225400 | OsR498G0409242800.01.T02 | Core-2/l-branching beta-16-N-acetylglucosaminyltransferase family protein |
| maker-4-augustus-gene-253.38-mRNA-1 | Japonica | NA       |           |              | OsR498G0409243200.01.T03 |                                                                           |
| maker-4-augustus-gene-253.6-mRNA-1  | Japonica | NA       |           |              |                          | Mannosyl-oligosaccharide 1,2-alpha-mannosidase (Fragment)                 |
| maker-4-augustus-gene-255.10-mRNA-1 | Japonica | NA       |           |              | OsR498G0409255000.01.T05 | Organic cation/carnitine transporter 7                                    |
| maker-4-augustus-gene-255.14-mRNA-1 | Japonica | NA       |           | Os04g0609600 | OsR498G0409256200.01.T02 | PPM-type phosphatase domain-containing protein                            |
| maker-4-augustus-gene-255.27-mRNA-1 | Japonica | NA       |           | Os04g0610000 |                          | PHD-type domain-containing protein                                        |
| maker-4-augustus-gene-255.3-mRNA-1  | Japonica | NA       |           | Os04g0609300 | OsR498G0409255300.01.T01 | Shikimate O-hydroxycinnamoyltransferase                                   |
| maker-4-augustus-gene-255.5-mRNA-1  | Japonica | NA       |           | Os04g0609500 | OsR498G0409255700.01.T01 | Anthranyl N-benzoyltransferase protein 1                                  |
| maker-4-augustus-gene-256.30-mRNA-1 | Japonica | NA       |           |              |                          | PHD-type domain-containing protein                                        |
| maker-4-augustus-gene-256.34-mRNA-1 | Japonica | NA       |           |              | OsR498G0409260900.01.T04 | Coproporphyrinogen oxidase                                                |
| maker-4-augustus-gene-256.39-mRNA-1 | Japonica | NA       | Kinase-TM | Os04g0610900 | OsR498G0409261700.01.T03 | Serine/threonine-protein kinase CTR1                                      |
| maker-4-augustus-gene-256.43-mRNA-1 | Japonica | NA       |           | Os04g0611200 | OsR498G0409263100.01.T01 | Transferase                                                               |
| maker-4-augustus-gene-256.57-mRNA-1 | Japonica | NA       |           |              | OsR498G0409259400.01.T01 | Methionine aminopeptidase                                                 |
| maker-4-augustus-gene-256.61-mRNA-1 | Japonica | NA       |           | Os04g0610700 | OsR498G0409260400.01.T05 | Potassium transporter                                                     |
| maker-4-augustus-gene-256.67-mRNA-1 | Japonica | NA       |           |              |                          | 26S proteasome non-ATPase regulatory subunit 8 homolog A                  |
| maker-4-augustus-gene-256.69-mRNA-1 | Japonica | Indica   |           | Os04g0611500 | OsR498G0409264000.01.T01 | Multiple RNA-binding domain-containing protein 1                          |
| maker-4-augustus-gene-257.45-mRNA-1 | Japonica | Japonica |           | Os04g0612000 | OsR498G0409265100.01.T01 | Ent-beyerene synthase                                                     |
| maker-4-augustus-gene-257.48-mRNA-1 | Japonica | NA       |           | Os04g0612700 | OsR498G0409267100.01.T01 | Cinnamyl alcohol dehydrogenase                                            |
| maker-4-augustus-gene-257.51-mRNA-1 | Japonica | NA       |           | Os04g0612900 | OsR498G0409267500.01.T01 | Vacuolar ATPase assembly integral membrane protein VMA21 homolog          |
| maker-4-augustus-gene-257.53-mRNA-1 | Japonica | NA       |           | Os04g0613200 | OsR498G0409268700.01.T01 | Polygalacturonase QRT3                                                    |
| maker-4-augustus-gene-257.58-mRNA-1 | Japonica | NA       |           | Os04g0613600 | OsR498G0409269500.01.T01 | 40S ribosomal protein S11                                                 |

|                                     |          |          |               |              |                          |                                                                      |
|-------------------------------------|----------|----------|---------------|--------------|--------------------------|----------------------------------------------------------------------|
| maker-4-augustus-gene-257.60-mRNA-1 | Japonica | Indica   |               | Os04g0612100 | OsR498G0409265400.01.T01 | Carbohydrate-binding X8 domain superfamily protein, putative         |
| maker-4-augustus-gene-257.63-mRNA-1 | Japonica | NA       |               | Os04g0612600 | OsR498G0409266800.01.T01 | Coatomer subunit epsilon                                             |
| maker-4-augustus-gene-257.67-mRNA-1 | Japonica | NA       |               | Os04g0613000 | OsR498G0409267800.01.T01 | Zinc transporter ZIP                                                 |
| maker-4-augustus-gene-257.70-mRNA-1 | Japonica | NA       |               | Os04g0613300 | OsR498G0409269000.01.T01 | Cysteine synthase-like isoform X1                                    |
| maker-4-augustus-gene-257.72-mRNA-1 | Japonica | NA       |               | Os04g0613400 | OsR498G0409269200.01.T03 | Cell differentiation                                                 |
| maker-4-augustus-gene-257.80-mRNA-1 | Japonica | NA       |               |              |                          | UDP-N-acetylglucosamine diphosphorylase 2                            |
| maker-4-augustus-gene-257.85-mRNA-1 | Japonica | NA       |               | Os04g0613800 | OsR498G0409270400.01.T03 | MBD domain-containing protein (Fragment)                             |
| maker-4-augustus-gene-258.29-mRNA-1 | Japonica | NA       |               | Os04g0614000 | OsR498G0409271500.01.T01 | Peroxisomal 2 4-dienoyl-CoA reductase                                |
| maker-4-augustus-gene-258.30-mRNA-1 | Japonica | NA       |               | Os04g0614100 |                          | Protein TRANSPARENT TESTA 16                                         |
| maker-4-augustus-gene-258.37-mRNA-1 | Japonica | NA       |               |              | OsR498G0409273100.01.T02 |                                                                      |
| maker-4-augustus-gene-258.41-mRNA-1 | Japonica | Japonica |               | Os04g0614500 | OsR498G0202838200.01.T01 | Adenosylmethionine aminotransferase1                                 |
| maker-4-augustus-gene-258.50-mRNA-1 | Japonica | NA       |               |              | OsR498G0409274700.01.T01 | Myosin heavy chain, skeletal muscle                                  |
| maker-4-augustus-gene-258.56-mRNA-1 | Japonica | NA       |               |              | OsR498G0409276700.01.T07 |                                                                      |
| maker-4-augustus-gene-258.61-mRNA-1 | Japonica | NA       |               | Os04g0615100 | OsR498G0409276900.01.T04 | Lecithine-cholesterol acyltransferase-like 4                         |
| maker-4-augustus-gene-258.71-mRNA-1 | Japonica | NA       |               | Os04g0615200 | OsR498G0409277400.01.T01 | Putative cysteine-rich transmembrane CYSTM domain-containing protein |
| maker-4-augustus-gene-259.0-mRNA-1  | Japonica | Indica   |               | Os04g0615500 | OsR498G0409277900.01.T02 | APO protein 1, chloroplastic                                         |
| maker-4-augustus-gene-259.11-mRNA-1 | Japonica | NA       |               | Os04g0615900 |                          | protein FAR-RED IMPAIRED RESPONSE 1-like                             |
| maker-4-augustus-gene-259.13-mRNA-1 | Japonica | NA       |               | Os04g0616000 | OsR498G0409280200.01.T02 |                                                                      |
| maker-4-augustus-gene-259.18-mRNA-1 | Japonica | Japonica |               | Os04g0616100 | OsR498G0409280600.01.T01 | sperm-associated antigen 1A isoform X2                               |
| maker-4-augustus-gene-259.2-mRNA-1  | Japonica | Indica   |               | Os04g0615600 | OsR498G0409278300.01.T01 | HMA domain-containing protein (Fragment)                             |
| maker-4-augustus-gene-259.21-mRNA-1 | Japonica | Indica   | Kinase-LRR-TM | Os08g0203700 | OsR498G0409280800.01.T01 | Non-specific serine/threonine protein kinase                         |
| maker-4-augustus-gene-259.22-mRNA-1 | Japonica | Indica   |               | Os08g0202300 | OsR498G0409280800.01.T06 | Leucine-rich repeat transmembrane protein kinase                     |
| maker-4-augustus-gene-259.29-mRNA-1 | Japonica | Indica   | LRR-TM        | Os04g0616700 | OsR498G0409282000.01.T05 | Non-specific serine/threonine protein kinase                         |
| maker-4-augustus-gene-259.31-mRNA-1 | Japonica | Japonica | Kinase        | Os04g0616400 | OsR498G0409282400.01.T01 | Leucine-rich repeat transmembrane protein kinase                     |
| maker-4-augustus-gene-259.33-mRNA-1 | Japonica | Indica   | LRR-TM        | Os04g0616700 | OsR498G0409282200.01.T05 | Non-specific serine/threonine protein kinase                         |
| maker-4-augustus-gene-259.35-mRNA-1 | Japonica | NA       | Kinase-TM     | Os04g0616600 | OsR498G0409282400.01.T01 | Leucine-rich repeat transmembrane protein kinase                     |
| maker-4-augustus-gene-259.37-mRNA-1 | Japonica | Indica   | LRR-TM        | Os04g0616700 | OsR498G0409282400.01.T05 | Non-specific serine/threonine protein kinase                         |
| maker-4-augustus-gene-259.4-mRNA-1  | Japonica | NA       |               | Os04g0615700 | OsR498G0409279300.01.T01 | Argonaute 2                                                          |
| maker-4-augustus-gene-259.6-mRNA-1  | Japonica | NA       |               |              | OsR498G0409279500.01.T01 | Argonaute protein group                                              |
| maker-4-augustus-gene-259.9-mRNA-1  | Japonica | NA       |               |              | OsR498G0409277800.01.T01 | Glycosyltransferase                                                  |
| maker-4-augustus-gene-260.11-mRNA-1 | Japonica | Japonica |               | Os04g0618200 | OsR498G0409288100.01.T02 | Probable UDP-arabinose 4-epimerase 2                                 |
| maker-4-augustus-gene-260.17-mRNA-1 | Japonica | NA       |               | Os04g0618600 | OsR498G0409288900.01.T04 | Phytochrome interacting factor 4                                     |
| maker-4-augustus-gene-260.19-mRNA-1 | Japonica | Japonica | Kinase-LRR-TM | Os04g0616700 | OsR498G0409282800.01.T02 | Leucine-rich repeat transmembrane protein kinase                     |
| maker-4-augustus-gene-260.21-mRNA-1 | Japonica | NA       |               | Os04g0617600 | OsR498G0409286200.01.T03 | Peroxisome biogenesis protein 6                                      |
| maker-4-augustus-gene-260.24-mRNA-1 | Japonica | NA       |               |              | OsR498G0409287000.01.T01 |                                                                      |
| maker-4-augustus-gene-260.26-mRNA-1 | Japonica | Indica   |               | Os04g0617900 | OsR498G0409287800.01.T01 | Germin-like protein 4-1                                              |
| maker-4-augustus-gene-260.7-mRNA-1  | Japonica | NA       |               | Os04g0617800 | OsR498G0409287500.01.T01 | Imidazoleglycerol-phosphate dehydratase                              |
| maker-4-augustus-gene-261.12-mRNA-1 | Japonica | NA       | Kinase-TM     | Os04g0619400 | OsR498G0409292800.01.T02 | Serine/threonine-protein kinase receptor                             |
| maker-4-augustus-gene-261.7-mRNA-1  | Japonica | NA       | Kinase-LRR-TM | Os04g0618700 | OsR498G0409289200.01.T01 | LRR receptor-like protein serine/threonine-protein kinase FLS2       |
| maker-4-augustus-gene-262.34-mRNA-1 | Japonica | Indica   |               | Os04g0620200 | OsR498G0409295700.01.T01 |                                                                      |
| maker-4-augustus-gene-262.38-mRNA-1 | Japonica | Indica   |               | Os04g0620400 | OsR498G0409296300.01.T01 | Serine/threonine-protein phosphatase 6 regulatory subunit 3          |
| maker-4-augustus-gene-262.43-mRNA-1 | Japonica | NA       |               | Os04g0620700 | OsR498G0409296700.01.T01 | Nucleolin                                                            |
| maker-4-augustus-gene-262.49-mRNA-1 | Japonica | NA       | CC-NBS-TM     |              |                          | Disease Resistance RGA protein (Pi69)                                |
| maker-4-augustus-gene-262.52-mRNA-1 | Japonica | Japonica | NBS-TM        | Os04g0621500 | OsR498G0409298500.01.T01 | NBS-type RGA protein (Fragment)                                      |
| maker-4-augustus-gene-262.55-mRNA-1 | Japonica | NA       |               |              | OsR498G0409299100.01.T01 | Putative NB-ARC domain-containing protein (Fragment)                 |
| maker-4-augustus-gene-262.59-mRNA-1 | Japonica | NA       |               |              |                          | ABC transporter C family member 2                                    |
| maker-4-augustus-gene-262.66-mRNA-1 | Japonica | NA       |               | Os04g0620600 | OsR498G0409296600.01.T01 | AvrRpt-cleavage domain-containing protein (Fragment)                 |
| maker-4-augustus-gene-262.68-mRNA-1 | Japonica | NA       |               |              | OsR498G0409299400.01.T02 |                                                                      |
| maker-4-augustus-gene-262.70-mRNA-1 | Japonica | Japonica |               | Os04g0622000 | OsR498G0409305600.01.T01 | Transcription factor GTE3, chloroplastic                             |
| maker-4-augustus-gene-263.42-mRNA-1 | Japonica | NA       | CC-LRR-NBS-TM | Os04g0622600 | OsR498G0409301900.01.T01 | BED-type domain-containing protein                                   |
| maker-4-augustus-gene-263.44-mRNA-1 | Japonica | NA       |               | Os04g0623500 | OsR498G0409307700.01.T01 | (S)-2-hydroxy-acid oxidase                                           |
| maker-4-augustus-gene-263.51-mRNA-1 | Japonica | NA       |               |              |                          | (S)-2-hydroxy-acid oxidase                                           |
| maker-4-augustus-gene-263.57-mRNA-1 | Japonica | NA       |               | Os04g0623700 | OsR498G0409308100.01.T01 | (S)-2-hydroxy-acid oxidase                                           |
| maker-4-augustus-gene-263.59-mRNA-1 | Japonica | NA       |               | Os04g0623800 | OsR498G0409308500.01.T01 | Aminomethyltransferase                                               |
| maker-4-augustus-gene-263.62-mRNA-1 | Japonica | Japonica |               | Os04g0622700 | OsR498G0409302400.01.T01 | Transcription factor GTE3, chloroplastic                             |
| maker-4-augustus-gene-263.63-mRNA-1 | Japonica | NA       |               |              |                          | Peptidase A1 domain-containing protein                               |
| maker-4-augustus-gene-263.64-mRNA-1 | Japonica | NA       |               | Os01g0178600 | OsR498G0100265100.01.T01 | Peptidase A1 domain-containing protein                               |
| maker-4-augustus-gene-263.65-mRNA-1 | Japonica | NA       |               | Os04g0623100 | OsR498G0409305600.01.T01 | Transcription factor GTE3, chloroplastic                             |
| maker-4-augustus-gene-263.90-mRNA-1 | Japonica | NA       |               | Os04g0623300 | OsR498G0409306200.01.T05 | Non-specific polyamine oxidase                                       |
| maker-4-augustus-gene-263.95-mRNA-1 | Japonica | NA       |               | Os04g0623400 | OsR498G0409307000.01.T05 | Exonuclease DPD1 chloroplastic/mitochondrial                         |
| maker-4-augustus-gene-264.0-mRNA-1  | Japonica | NA       |               | Os04g0624300 | OsR498G0409310700.01.T01 | Copper-containing polyphenol oxidase                                 |

|                                      |          |          |           |              |                          |                                                                         |
|--------------------------------------|----------|----------|-----------|--------------|--------------------------|-------------------------------------------------------------------------|
| maker-4-augustus-gene-264.1-mRNA-1   | Japonica | NA       |           | Os04g0625100 | OsR498G0409313500.01.T01 | Hepatoma-derived growth factor-related protein 2                        |
| maker-4-augustus-gene-264.10-mRNA-1  | Japonica | NA       |           | Os04g0624600 | OsR498G0409312000.01.T01 | Starch synthase IIIb                                                    |
| maker-4-augustus-gene-264.16-mRNA-1  | Japonica | NA       |           | Os04g0624800 | OsR498G0409312400.01.T01 | Binding partner of like (Fragment)                                      |
| maker-4-augustus-gene-264.18-mRNA-1  | Japonica | Indica   |           | Os08g0190700 | OsR498G0409312800.01.T01 | CAP-Gly domain-containing linker protein 1-like                         |
| maker-4-augustus-gene-264.20-mRNA-1  | Japonica | NA       |           |              | OsR498G0409315200.01.T02 | NopRA1 domain-containing protein                                        |
| maker-4-augustus-gene-264.3-mRNA-1   | Japonica | Indica   |           | Os04g0625200 | OsR498G0409314500.01.T02 | 1-acyl-sn-glycerol-3-phosphate acyltransferase                          |
| maker-4-augustus-gene-264.6-mRNA-1   | Japonica | NA       |           | Os04g0624000 | OsR498G0409310000.01.T03 | Autophagy-related protein 8B                                            |
| maker-4-augustus-gene-265.14-mRNA-1  | Japonica | NA       |           | Os04g0626000 | OsR498G0409317400.01.T02 | AT hook motif family protein                                            |
| maker-4-augustus-gene-265.17-mRNA-1  | Japonica | NA       |           | Os04g0626400 | OsR498G0409317800.01.T02 | CHL-Zea mays Chloroplastic lipocalin                                    |
| maker-4-augustus-gene-265.20-mRNA-1  | Japonica | NA       |           | Os04g0626600 | OsR498G0409319200.01.T02 | FBD domain-containing protein (Fragment)                                |
| maker-4-augustus-gene-265.21-mRNA-1  | Japonica | NA       |           | Os04g0626700 | OsR498G0409319400.01.T01 | FBD domain-containing protein                                           |
| maker-4-augustus-gene-265.4-mRNA-1   | Japonica | NA       |           | Os04g0625900 | OsR498G0409317100.01.T02 | Polyadenylate-binding protein-interacting protein 3                     |
| maker-4-augustus-gene-265.8-mRNA-1   | Japonica | NA       |           | Os04g0626900 | OsR498G0409319500.01.T01 | AP-5 complex subunit zeta-1                                             |
| maker-4-augustus-gene-266.0-mRNA-1   | Japonica | NA       |           | Os04g0627300 | OsR498G0409321700.01.T01 |                                                                         |
| maker-4-augustus-gene-266.12-mRNA-1  | Japonica | Indica   |           | Os04g0629000 | OsR498G0409325500.01.T04 | Peroxisome bioproteins protein 22                                       |
| maker-4-augustus-gene-266.17-mRNA-1  | Japonica | NA       |           | Os04g0629200 | OsR498G0409325900.01.T01 | Phytoecyanin domain-containing protein (Fragment)                       |
| maker-4-augustus-gene-266.19-mRNA-1  | Japonica | NA       |           | Os04g0627000 | OsR498G0409319800.01.T05 | Homeobox-leucine zipper protein MERISTEM L1                             |
| maker-4-augustus-gene-266.27-mRNA-1  | Japonica | NA       |           |              | OsR498G0409322200.01.T01 | ROP-interactive CRIB motif-containing protein 10                        |
| maker-4-augustus-gene-266.3-mRNA-1   | Japonica | NA       |           |              | OsR498G0409323900.01.T04 | Tetratricopeptide repeat-like superfamily protein, putative             |
| maker-4-augustus-gene-266.31-mRNA-1  | Japonica | NA       |           | Os04g0628000 | OsR498G0409323600.01.T02 | APO protein 4 mitochondrial                                             |
| maker-4-augustus-gene-266.34-mRNA-1  | Japonica | NA       |           | Os04g0628400 |                          | Zinc finger BED domain-containing protein DAYSLEEPER                    |
| maker-4-augustus-gene-266.36-mRNA-1  | Japonica | NA       |           | Os04g0628600 | OsR498G0409324800.01.T01 | UHRF1-binding protein 1-like                                            |
| maker-4-augustus-gene-266.4-mRNA-1   | Japonica | Indica   |           | Os04g0628200 | OsR498G0409323900.01.T05 | Peroxidase                                                              |
| maker-4-augustus-gene-266.44-mRNA-1  | Japonica | NA       |           | Os04g0629100 | OsR498G0409325800.01.T01 | Histone-lysine N-methyltransferase ATXR2                                |
| maker-4-augustus-gene-266.49-mRNA-1  | Japonica | NA       |           | Os04g0629300 | OsR498G0409326200.01.T02 | Putative SNF2-domain/RING finger domain/helicase domain protein         |
| maker-4-augustus-gene-267.122-mRNA-1 | Japonica | NA       |           | Os04g0629700 | OsR498G0409327400.01.T01 | Kinesin-like protein KIN-14H                                            |
| maker-4-augustus-gene-267.40-mRNA-1  | Japonica | NA       |           |              | OsR498G0409326900.01.T03 |                                                                         |
| maker-4-augustus-gene-267.42-mRNA-1  | Japonica | NA       |           | Os04g0630000 | OsR498G0409327700.01.T05 |                                                                         |
| maker-4-augustus-gene-267.48-mRNA-1  | Japonica | Japonica |           | Os04g0630100 | OsR498G0409328500.01.T03 | Epimerase domain-containing protein                                     |
| maker-4-augustus-gene-267.51-mRNA-1  | Japonica | NA       |           | Os04g0630300 | OsR498G0409328500.01.T03 | Epimerase domain-containing protein (Fragment)                          |
| maker-4-augustus-gene-267.52-mRNA-1  | Japonica | NA       |           | Os04g0630400 | OsR498G0409328900.01.T01 | Epimerase domain-containing protein (Fragment)                          |
| maker-4-augustus-gene-268.0-mRNA-1   | Japonica | Indica   | Kinase-TM | Os04g0633800 | OsR498G0409337500.01.T02 | Serine/threonine-protein kinase                                         |
| maker-4-augustus-gene-268.22-mRNA-1  | Japonica | Indica   | Kinase-TM | Os04g0632700 | OsR498G0409334800.01.T01 | Serine/threonine-protein kinase                                         |
| maker-4-augustus-gene-268.25-mRNA-1  | Japonica | Japonica | Kinase-TM | Os04g0633200 | OsR498G0409335600.01.T01 | Non-specific serine/threonine protein kinase                            |
| maker-4-augustus-gene-268.31-mRNA-1  | Japonica | NA       | Kinase-TM | Os04g0633300 | OsR498G0409336200.01.T01 | Non-specific serine/threonine protein kinase                            |
| maker-4-augustus-gene-269.48-mRNA-1  | Japonica | NA       |           |              | OsR498G0409339300.01.T01 |                                                                         |
| maker-4-augustus-gene-269.51-mRNA-1  | Japonica | NA       |           | Os04g0634700 | OsR498G0409339700.01.T05 | Diacylglycerol kinase                                                   |
| maker-4-augustus-gene-269.58-mRNA-1  | Japonica | NA       |           | Os04g0635900 | OsR498G0409343500.01.T04 | Double-strand break repair protein MRE11                                |
| maker-4-augustus-gene-269.65-mRNA-1  | Japonica | Indica   |           | Os04g0636400 | OsR498G0409345100.01.T02 | Aspergillus nuclease S(1)                                               |
| maker-4-augustus-gene-269.69-mRNA-1  | Japonica | NA       |           | Os04g0636500 | OsR498G0409345300.01.T01 | Phototropic-responsive NPH3 family protein                              |
| maker-4-augustus-gene-269.71-mRNA-1  | Japonica | Indica   | Kinase-TM | Os01g0783800 | OsR498G0409339200.01.T03 | Cysteine rich receptor like kinase                                      |
| maker-4-augustus-gene-269.77-mRNA-1  | Japonica | NA       |           | Os03g0643100 | OsR498G0713408500.01.T01 | WAC domain-containing protein                                           |
| maker-4-augustus-gene-269.90-mRNA-1  | Japonica | NA       |           | Os04g0636600 | OsR498G0409345600.01.T01 | Formation of crista junctions protein 1                                 |
| maker-4-augustus-gene-269.95-mRNA-1  | Japonica | NA       |           | Os04g0636700 | OsR498G0409345800.01.T01 | CID domain                                                              |
| maker-4-augustus-gene-269.98-mRNA-1  | Japonica | Japonica |           | Os04g0636800 | OsR498G0409346000.01.T01 | UBP1-associated protein 2A                                              |
| maker-4-augustus-gene-270.52-mRNA-1  | Japonica | NA       |           |              | OsR498G0409347100.01.T04 | Transcription factor TGA4                                               |
| maker-4-augustus-gene-270.56-mRNA-1  | Japonica | NA       |           |              | OsR498G0409347500.01.T01 | Epidermal patterning factor 2                                           |
| maker-4-augustus-gene-270.58-mRNA-1  | Japonica | Indica   |           | Os08g0175300 | OsR498G0409347700.01.T03 | White seedling2                                                         |
| maker-4-augustus-gene-270.64-mRNA-1  | Japonica | NA       |           | Os04g0639200 | OsR498G0409351100.01.T01 | Stress enhanced protein 2, chloroplastic                                |
| maker-4-augustus-gene-270.67-mRNA-1  | Japonica | NA       |           | Os04g0638100 | OsR498G0409348400.01.T02 | Anthocyanin 5-aromatic acyltransferase                                  |
| maker-4-augustus-gene-270.68-mRNA-1  | Japonica | Indica   |           | Os04g0638100 | OsR498G0409349000.01.T01 | Anthocyanin 5-aromatic acyltransferase                                  |
| maker-4-augustus-gene-270.69-mRNA-1  | Japonica | NA       |           | Os04g0638700 | OsR498G0409349400.01.T01 |                                                                         |
| maker-4-augustus-gene-270.82-mRNA-1  | Japonica | Indica   |           | Os04g0639300 | OsR498G0409351400.01.T02 | Transmembrane protein                                                   |
| maker-4-augustus-gene-271.33-mRNA-1  | Japonica | Indica   |           | Os04g0640200 | OsR498G0409353100.01.T02 | Biogenesis of lysosome-related organelles complex 1 subunit 1           |
| maker-4-augustus-gene-271.35-mRNA-1  | Japonica | Japonica |           | Os04g0640500 | OsR498G0409353700.01.T04 | Putative aarF domain-containing protein kinase, chloroplastic isoform A |
| maker-4-augustus-gene-271.38-mRNA-1  | Japonica | NA       |           | Os04g0640800 | OsR498G0409355100.01.T01 | Programmed cell death protein 2                                         |
| maker-4-augustus-gene-271.41-mRNA-1  | Japonica | NA       |           | Os04g0641000 | OsR498G0409355500.01.T02 | DNA-directed RNA polymerase subunit beta                                |
| maker-4-augustus-gene-271.45-mRNA-1  | Japonica | NA       |           | Os04g0641200 | OsR498G0409356300.01.T01 | Pectinesterase                                                          |
| maker-4-augustus-gene-271.50-mRNA-1  | Japonica | NA       | NBS       | Os04g0640600 | OsR498G0409354200.01.T01 | Shikimate kinase                                                        |
| maker-4-augustus-gene-271.56-mRNA-1  | Japonica | NA       |           | Os04g0640700 | OsR498G0409354400.01.T01 | Beta-xylosidase/alpha-L-arabinofuranosidase 2                           |
| maker-4-augustus-gene-271.60-mRNA-1  | Japonica | NA       |           | Os04g0641400 | OsR498G0409356800.01.T05 | Binding partner of ACD11 1 isoform A                                    |

|                                     |          |          |               |              |                          |                                                                            |
|-------------------------------------|----------|----------|---------------|--------------|--------------------------|----------------------------------------------------------------------------|
| maker-4-augustus-gene-272.0-mRNA-1  | Japonica | NA       |               |              |                          |                                                                            |
| maker-4-augustus-gene-272.10-mRNA-1 | Japonica | NA       |               |              |                          | Protein kinase domain-containing protein                                   |
| maker-4-augustus-gene-272.15-mRNA-1 | Japonica | Indica   |               | Os03g0171300 | OsR498G0409357800.01.T01 | Transcription factor ILI3                                                  |
| maker-4-augustus-gene-272.17-mRNA-1 | Japonica | Indica   |               | Os04g0459000 | OsR498G0409358600.01.T01 | ABC transporter B family member 19                                         |
| maker-4-augustus-gene-272.2-mRNA-1  | Japonica | NA       |               |              | OsR498G0409360500.01.T01 | Microtubule-associated protein RP/EB family member                         |
| maker-4-augustus-gene-272.20-mRNA-1 | Japonica | NA       |               |              | OsR498G0409361000.01.T01 |                                                                            |
| maker-4-augustus-gene-272.6-mRNA-1  | Japonica | NA       |               |              | OsR498G0409361500.01.T01 | Cullin domain-containing protein                                           |
| maker-4-augustus-gene-272.8-mRNA-1  | Japonica | NA       |               | Os04g0643000 | OsR498G0409362700.01.T01 |                                                                            |
| maker-4-augustus-gene-273.0-mRNA-1  | Japonica | NA       |               | Os04g0643300 | OsR498G0409364100.01.T01 | Beta-ketoacyl-[acyl-carrier-protein] synthase III                          |
| maker-4-augustus-gene-273.13-mRNA-1 | Japonica | Japonica |               | Os04g0643800 | OsR498G0409364900.01.T01 |                                                                            |
| maker-4-augustus-gene-273.17-mRNA-1 | Japonica | NA       |               | Os04g0644000 |                          | Plasma membrane fusion protein                                             |
| maker-4-augustus-gene-273.19-mRNA-1 | Japonica | NA       |               |              | OsR498G0409367300.01.T01 | NEDD8 ultimate buster                                                      |
| maker-4-augustus-gene-273.25-mRNA-1 | Japonica | NA       |               | Os04g0644700 | OsR498G0409368700.01.T03 | Coatomer subunit epsilon                                                   |
| maker-4-augustus-gene-273.29-mRNA-1 | Japonica | NA       |               |              | OsR498G0409368900.01.T01 | Chloride channel clc                                                       |
| maker-4-augustus-gene-273.35-mRNA-1 | Japonica | Indica   |               | Os08g0300200 | OsR498G0409369300.01.T02 | Synaptotagmin-5                                                            |
| maker-4-augustus-gene-273.41-mRNA-1 | Japonica | NA       |               |              | OsR498G0409363800.01.T03 | Glutamyl-tRNA(Gln) amidotransferase subunit A, chloroplastic/mitochondrial |
| maker-4-augustus-gene-273.46-mRNA-1 | Japonica | NA       |               | Os04g0643500 | OsR498G0409364400.01.T01 | Flavonol synthase/flavanone 3-hydroxylase                                  |
| maker-4-augustus-gene-273.48-mRNA-1 | Japonica | NA       |               | Os04g0644600 | OsR498G0409368200.01.T02 | AB hydrolase-1 domain-containing protein                                   |
| maker-4-augustus-gene-273.5-mRNA-1  | Japonica | NA       |               |              | OsR498G0409364500.01.T01 |                                                                            |
| maker-4-augustus-gene-273.54-mRNA-1 | Japonica | NA       |               |              |                          | SPOC domain-containing protein                                             |
| maker-4-augustus-gene-273.7-mRNA-1  | Japonica | NA       |               |              | OsR498G0409364500.01.T02 | Cyclic nucleotide-gated ion channel                                        |
| maker-4-augustus-gene-274.26-mRNA-1 | Japonica | NA       |               |              | OsR498G0409370100.01.T02 | Tetratricopeptide repeat (TPR)-like superfamily protein                    |
| maker-4-augustus-gene-274.32-mRNA-1 | Japonica | NA       |               |              |                          | thiamine-repressible mitochondrial transport protein THI74-like            |
| maker-4-augustus-gene-274.37-mRNA-1 | Japonica | Indica   |               | Os01g0857600 | OsR498G0409372000.01.T01 |                                                                            |
| maker-4-augustus-gene-274.38-mRNA-1 | Japonica | NA       |               |              | OsR498G0102369600.01.T01 |                                                                            |
| maker-4-augustus-gene-275.12-mRNA-1 | Japonica | NA       |               | Os04g0648700 | OsR498G0409380900.01.T01 | ERCC4 domain-containing protein                                            |
| maker-4-augustus-gene-275.17-mRNA-1 | Japonica | NA       |               | Os04g0647800 | OsR498G0409377600.01.T01 | Glycerol kinase                                                            |
| maker-4-augustus-gene-275.19-mRNA-1 | Japonica | NA       |               | Os04g0648500 | OsR498G0409379800.01.T02 | BRCA1-associated protein isoform A                                         |
| maker-4-augustus-gene-275.3-mRNA-1  | Japonica | NA       | LRR-TM        |              | OsR498G0409378300.01.T01 | LRR binding protein                                                        |
| maker-4-augustus-gene-276.29-mRNA-1 | Japonica | NA       |               |              | OsR498G0409381900.01.T06 | E3 ubiquitin-protein ligase MBR2                                           |
| maker-4-augustus-gene-276.34-mRNA-1 | Japonica | NA       |               |              | OsR498G0409385900.01.T09 | AP2-like ethylene-responsive transcription factor TOE3 (Fragment)          |
| maker-4-augustus-gene-276.41-mRNA-1 | Japonica | NA       |               | Os04g0649200 | OsR498G0409386900.01.T01 | Filament-like plant protein 4                                              |
| maker-4-augustus-gene-276.45-mRNA-1 | Japonica | NA       |               | Os04g0649400 | OsR498G0409387800.01.T01 | Homeobox domain                                                            |
| maker-4-augustus-gene-276.47-mRNA-1 | Japonica | NA       | Kinase-LRR-TM | Os04g0649700 | OsR498G0409389000.01.T01 | Putative inactive receptor kinase                                          |
| maker-4-augustus-gene-277.0-mRNA-1  | Japonica | NA       |               | Os04g0650500 | OsR498G0409391900.01.T01 | Protein COFACTOR ASSEMBLY OF COMPLEX C SUBUNIT B CCB4, chloroplastic       |
| maker-4-augustus-gene-277.10-mRNA-1 | Japonica | Japonica | CC-Kinase-TM  | Os04g0651500 | OsR498G0409395900.01.T01 | Wall-associated receptor kinase 3                                          |
| maker-4-augustus-gene-277.14-mRNA-1 | Japonica | Indica   |               | Os04g0670200 | OsR498G0409389600.01.T01 | Oryzain alpha chain like                                                   |
| maker-4-augustus-gene-277.20-mRNA-1 | Japonica | NA       |               | Os04g0650200 | OsR498G0409390800.01.T01 | GDSL esterase/lipase                                                       |
| maker-4-augustus-gene-277.22-mRNA-1 | Japonica | NA       |               |              | OsR498G0409391400.01.T01 | Glycosyltransferases                                                       |
| maker-4-augustus-gene-277.24-mRNA-1 | Japonica | NA       |               | Os04g0650600 | OsR498G0409392200.01.T02 | Small RNA degrading nuclease 1                                             |
| maker-4-augustus-gene-277.30-mRNA-1 | Japonica | NA       |               |              | OsR498G0409394400.01.T05 | alpha-N-acetylglucosaminidase isoform X1                                   |
| maker-4-augustus-gene-277.33-mRNA-1 | Japonica | NA       |               |              | OsR498G0409394400.01.T07 | Alpha-N-acetylglucosaminidase family / NAGLU family                        |
| maker-4-augustus-gene-277.37-mRNA-1 | Japonica | NA       |               |              | OsR498G0409396800.01.T01 | FBD domain-containing protein                                              |
| maker-4-augustus-gene-277.7-mRNA-1  | Japonica | NA       |               | Os04g0650800 | OsR498G0409394100.01.T01 | D-3-phosphoglycerate dehydrogenase                                         |
| maker-4-augustus-gene-279.0-mRNA-1  | Japonica | NA       |               | Os04g0653300 | OsR498G0409403100.01.T01 | Auxin-responsive protein (Fragment)                                        |
| maker-4-augustus-gene-279.14-mRNA-1 | Japonica | NA       | Kinase-TM     | Os04g0654600 | OsR498G0409406500.01.T01 | probable receptor-like serine/threonine-protein kinase At5g57670           |
| maker-4-augustus-gene-279.16-mRNA-1 | Japonica | NA       |               | Os04g0654700 | OsR498G0409407100.01.T02 | COP9 signalosome complex subunit                                           |
| maker-4-augustus-gene-279.2-mRNA-1  | Japonica | Indica   |               | Os09g0558900 | OsR498G0409404300.01.T02 | NADPH--cytochrome P450 reductase                                           |
| maker-4-augustus-gene-279.21-mRNA-1 | Japonica | NA       | Kinase-TM     | Os04g0655300 | OsR498G0409409300.01.T01 | G-type lectin S-receptor-like serine/threonine-protein kinase              |
| maker-4-augustus-gene-279.23-mRNA-1 | Japonica | Indica   | Kinase-TM     | Os04g0655400 | OsR498G0409409600.01.T01 | G-type lectin S-receptor-like serine/threonine-protein kinase              |
| maker-4-augustus-gene-279.9-mRNA-1  | Japonica | NA       |               | Os04g0653600 | OsR498G0409405100.01.T01 | AP2-like ethylene-responsive transcription factor AIL6                     |
| maker-4-augustus-gene-28.48-mRNA-1  | Japonica | NA       |               |              |                          |                                                                            |
| maker-4-augustus-gene-280.0-mRNA-1  | Japonica | Indica   | Kinase-TM     | Os04g0655300 | OsR498G0409410100.01.T01 | Mitogen-activated protein kinase kinase kinase                             |
| maker-4-augustus-gene-280.19-mRNA-1 | Japonica | NA       |               | Os04g0656800 | OsR498G0409416200.01.T01 | Peroxidase                                                                 |
| maker-4-augustus-gene-280.2-mRNA-1  | Japonica | NA       |               | Os04g0655600 | OsR498G0409410300.01.T03 |                                                                            |
| maker-4-augustus-gene-281.37-mRNA-1 | Japonica | NA       |               |              | OsR498G0409417100.01.T02 |                                                                            |
| maker-4-augustus-gene-281.39-mRNA-1 | Japonica | NA       |               | Os04g0657500 | OsR498G0409417900.01.T01 | Lipase class 3-like                                                        |
| maker-4-augustus-gene-281.42-mRNA-1 | Japonica | NA       |               | Os04g0657900 |                          | Fortune-1                                                                  |
| maker-4-augustus-gene-281.44-mRNA-1 | Japonica | NA       |               | Os04g0658000 | OsR498G0409418900.01.T03 | Glucose-6-phosphate 1-epimerase                                            |
| maker-4-augustus-gene-281.48-mRNA-1 | Japonica | Japonica | Kinase-TM     | Os04g0658700 | OsR498G0409421500.01.T01 | Similar to putative receptor protein kinase from A. thaliana               |
| maker-4-augustus-gene-281.51-mRNA-1 | Japonica | NA       |               | Os04g0657100 | OsR498G0409417400.01.T01 | Farnesyl pyrophosphate synthetase                                          |

|                                      |          |          |                                |              |                          |                                                                              |
|--------------------------------------|----------|----------|--------------------------------|--------------|--------------------------|------------------------------------------------------------------------------|
| maker-4-augustus-gene-281.55-mRNA-1  | Japonica | NA       |                                | Os04g0657300 | OsR498G0409417800.01.T01 | Farnesyl pyrophosphate synthase                                              |
| maker-4-augustus-gene-281.60-mRNA-1  | Japonica | Japonica |                                | Os04g0658200 | OsR498G0613102200.01.T03 | MAGUK p55 subfamily member 4 like                                            |
| maker-4-augustus-gene-281.62-mRNA-1  | Japonica | NA       |                                |              |                          | Ribulose biphosphate carboxylase/oxygenase activase                          |
| maker-4-augustus-gene-282.24-mRNA-1  | Japonica | NA       |                                | Os04g0659000 | OsR498G0409423900.01.T02 |                                                                              |
| maker-4-augustus-gene-282.26-mRNA-1  | Japonica | NA       |                                | Os04g0659400 | OsR498G0409425700.01.T06 | ENT domain-containing protein                                                |
| maker-4-augustus-gene-282.33-mRNA-1  | Japonica | Indica   |                                | Os04g0470700 | OsR498G0409426500.01.T01 | Solute carrier family 36                                                     |
| maker-4-augustus-gene-282.44-mRNA-1  | Japonica | NA       |                                | Os04g0660400 | OsR498G0409428700.01.T02 | UDP-arabinopyranose mutase 5                                                 |
| maker-4-augustus-gene-282.45-mRNA-1  | Japonica | NA       |                                | Os04g0659100 | OsR498G0409423800.01.T04 | Chloroplast glutamine synthetase                                             |
| maker-4-augustus-gene-282.51-mRNA-1  | Japonica | Indica   |                                | Os04g0659150 | OsR498G0409424400.01.T01 | Bifunctional lysine-specific demethylase and histidyl-hydroxylase            |
| maker-4-augustus-gene-282.54-mRNA-1  | Japonica | Indica   |                                | Os04g0659500 | OsR498G0409426000.01.T02 | Protein-serine/threonine phosphatase                                         |
| maker-4-augustus-gene-282.59-mRNA-1  | Japonica | NA       |                                | Os04g0660200 | OsR498G0409428400.01.T01 | probable serine/threonine-protein kinase abkC                                |
| maker-4-augustus-gene-283.0-mRNA-1   | Japonica | NA       |                                | Os04g0660900 | OsR498G0409430500.01.T01 | Putative proton-dependent oligopeptide transporter family, major facilitator |
| maker-4-augustus-gene-283.11-mRNA-1  | Japonica | Indica   |                                | Os04g0661900 | OsR498G0409432700.01.T01 | 26S proteasome regulatory particle non-ATPase subunit 8                      |
| maker-4-augustus-gene-283.17-mRNA-1  | Japonica | NA       |                                | Os04g0662000 | OsR498G0409432900.01.T03 | BSD domain-containing protein (Fragment)                                     |
| maker-4-augustus-gene-283.19-mRNA-1  | Japonica | NA       | Kinase-TM OsMAPKKK&epsilon;lon | Os04g0660500 | OsR498G0409429000.01.T02 | MAP3K epsilon protein kinase 1                                               |
| maker-4-augustus-gene-283.2-mRNA-1   | Japonica | NA       |                                |              | OsR498G0409432100.01.T03 | Molybdopter in molybdenumtransferase                                         |
| maker-4-augustus-gene-283.25-mRNA-1  | Japonica | Indica   |                                | Os04g0660600 | OsR498G0409429200.01.T01 | V-type proton ATPase subunit e1 like                                         |
| maker-4-augustus-gene-283.28-mRNA-1  | Japonica | NA       |                                |              | OsR498G0409430800.01.T01 | Putative heavy metal-associated domain, HMA                                  |
| maker-4-augustus-gene-283.30-mRNA-1  | Japonica | NA       |                                | Os04g0661200 | OsR498G0409431000.01.T01 | Inositol-pentakisphosphate 2-kinase                                          |
| maker-4-augustus-gene-283.34-mRNA-1  | Japonica | NA       |                                | Os04g0661300 | OsR498G0409431200.01.T02 | Myosin-H heavy chain isoform 1                                               |
| maker-4-augustus-gene-283.39-mRNA-1  | Japonica | NA       |                                | Os04g0661700 | OsR498G0409432400.01.T02 | Serine/arginine repetitive matrix protein 2 isoform X2                       |
| maker-4-augustus-gene-283.4-mRNA-1   | Japonica | NA       |                                |              | OsR498G0409432100.01.T05 | Molybdopter in molybdenumtransferase                                         |
| maker-4-augustus-gene-283.49-mRNA-1  | Japonica | NA       |                                |              | OsR498G0409433200.01.T03 | U3 small nucleolar ribonucleoprotein protein IMP3                            |
| maker-4-augustus-gene-283.52-mRNA-1  | Japonica | NA       |                                |              | OsR498G0409435200.01.T01 | Feruloyl-CoA 6-hydroxylase                                                   |
| maker-4-augustus-gene-284.11-mRNA-1  | Japonica | Indica   |                                | Os04g0662700 | OsR498G0409435600.01.T02 | GTP cyclohydrolase 1                                                         |
| maker-4-augustus-gene-284.14-mRNA-1  | Japonica | NA       |                                | Os04g0662900 | OsR498G0409436400.01.T03 | Repressor of RNA polymerase III transcription                                |
| maker-4-augustus-gene-285.14-mRNA-1  | Japonica | NA       |                                | Os06g0323100 | OsR498G0409452300.01.T01 | Indole-3-acetate O-methyltransferase                                         |
| maker-4-augustus-gene-285.23-mRNA-1  | Japonica | NA       |                                | Os04g0665400 | OsR498G0409447000.01.T02 | Putative tubulin GTPase                                                      |
| maker-4-augustus-gene-285.25-mRNA-1  | Japonica | NA       |                                | Os04g0665600 | OsR498G0409448200.01.T02 | HTH myb-type domain-containing protein (Fragment)                            |
| maker-4-augustus-gene-285.3-mRNA-1   | Japonica | Indica   |                                | Os04g0665500 | OsR498G0409447900.01.T02 | SWIB/MDM2 domain containing protein                                          |
| maker-4-augustus-gene-286.0-mRNA-1   | Japonica | Indica   |                                | Os06g0323100 | OsR498G0409451900.01.T01 | Indole-3-acetate O-methyltransferase                                         |
| maker-4-augustus-gene-286.2-mRNA-1   | Japonica | Indica   |                                | Os06g0323100 | OsR498G0409452300.01.T01 | Indole-3-acetate O-methyltransferase 1                                       |
| maker-4-augustus-gene-286.20-mRNA-1  | Japonica | NA       |                                | Os04g0666800 | OsR498G0409453400.01.T01 | Dirigent protein (Fragment)                                                  |
| maker-4-augustus-gene-286.22-mRNA-1  | Japonica | NA       |                                | Os04g0666900 | OsR498G0409453600.01.T03 | Kinesin-like calmodulin-binding protein (ZWICHEL) isoform 4                  |
| maker-4-augustus-gene-286.29-mRNA-1  | Japonica | Indica   |                                | Os04g0667000 | OsR498G0409454200.01.T02 | Tafazzin family protein (Fragment)                                           |
| maker-4-augustus-gene-286.33-mRNA-1  | Japonica | NA       |                                | Os04g0667400 | OsR498G0409455200.01.T01 | Flavonol synthase/flavanone 3-hydroxylase                                    |
| maker-4-augustus-gene-286.35-mRNA-1  | Japonica | NA       |                                |              | OsR498G0409455400.01.T03 | Ubiquitin carboxyl-terminal hydrolase                                        |
| maker-4-augustus-gene-286.41-mRNA-1  | Japonica | NA       |                                | Os04g0667800 | OsR498G0409456400.01.T05 | UBC core domain-containing protein (Fragment)                                |
| maker-4-augustus-gene-286.6-mRNA-1   | Japonica | NA       |                                | Os04g0667200 | OsR498G0409454700.01.T03 | Putative flavonol synthase/flavanone 3-hydroxylase                           |
| maker-4-augustus-gene-286.7-mRNA-1   | Japonica | Indica   |                                | Os04g0667600 | OsR498G0409455900.01.T01 | heavy metal-associated isoprenylated plant protein 3                         |
| maker-4-augustus-gene-286.9-mRNA-1   | Japonica | NA       |                                |              | OsR498G0409456100.01.T03 | Actin-related protein 8                                                      |
| maker-4-augustus-gene-287.102-mRNA-1 | Japonica | Indica   |                                | Os04g0670400 | OsR498G0409462600.01.T04 | SEC-C motif-containing protein / OTU-like cysteine protease family protein   |
| maker-4-augustus-gene-287.108-mRNA-1 | Japonica | Indica   |                                | Os04g0670600 | OsR498G0409463200.01.T06 | Exostosin domain-containing protein (Fragment)                               |
| maker-4-augustus-gene-287.51-mRNA-1  | Japonica | NA       |                                |              |                          | Putative EH-domain-containing protein 1                                      |
| maker-4-augustus-gene-287.61-mRNA-1  | Japonica | NA       |                                | Os04g0670500 | OsR498G0409462700.01.T01 | Oryzain alpha chain                                                          |
| maker-4-augustus-gene-287.63-mRNA-1  | Japonica | NA       |                                |              | OsR498G0409462900.01.T01 | Phytol kinase                                                                |
| maker-4-augustus-gene-287.68-mRNA-1  | Japonica | Indica   |                                | Os04g0668900 | OsR498G0409459400.01.T07 | Ubiquinol oxidase                                                            |
| maker-4-augustus-gene-287.73-mRNA-1  | Japonica | NA       |                                | Os04g0669100 | OsR498G0409459600.01.T01 | Triacylglycerol lipase 2-like protein                                        |
| maker-4-augustus-gene-287.99-mRNA-1  | Japonica | NA       |                                | Os04g0670200 | OsR498G0409462200.01.T01 | Oryzain beta chain                                                           |
| maker-4-augustus-gene-288.42-mRNA-1  | Japonica | NA       |                                | Os04g0671700 | OsR498G0409466600.01.T01 | Intracellular protease 1                                                     |
| maker-4-augustus-gene-288.48-mRNA-1  | Japonica | NA       |                                | Os04g0671900 | OsR498G0409467400.01.T03 | Auxin response factor                                                        |
| maker-4-augustus-gene-289.39-mRNA-1  | Japonica | NA       |                                | Os04g0672900 | OsR498G0409471500.01.T01 | Putative Lunapark domain-containing protein                                  |
| maker-4-augustus-gene-289.41-mRNA-1  | Japonica | NA       |                                | Os04g0673300 | OsR498G0409475700.01.T01 | Two-component response regulator ORR5                                        |
| maker-4-augustus-gene-289.43-mRNA-1  | Japonica | NA       |                                | Os04g0673700 |                          |                                                                              |
| maker-4-augustus-gene-289.45-mRNA-1  | Japonica | NA       |                                | Os04g0674200 | OsR498G0409478300.01.T01 | Ubiquinone biosynthesis protein COQ4 homolog, mitochondrial                  |
| maker-4-augustus-gene-289.47-mRNA-1  | Japonica | NA       |                                | Os04g0672200 | OsR498G0409469600.01.T02 | Poly [ADP-ribose] polymerase                                                 |
| maker-4-augustus-gene-289.53-mRNA-1  | Japonica | NA       |                                | Os04g0672300 | OsR498G0409470000.01.T02 | TIMELESS-interacting protein isoform X1                                      |
| maker-4-augustus-gene-289.56-mRNA-1  | Japonica | NA       |                                |              | OsR498G0409471800.01.T05 | Putative homeodomain-like transcription factor superfamily protein           |
| maker-4-augustus-gene-289.62-mRNA-1  | Japonica | NA       |                                | Os04g0673400 | OsR498G0409476600.01.T02 | Uracil-DNA glycosylase                                                       |
| maker-4-augustus-gene-289.66-mRNA-1  | Japonica | NA       |                                | Os04g0673800 | OsR498G0409477000.01.T01 | Phytoecyanin domain-containing protein (Fragment)                            |
| maker-4-augustus-gene-289.68-mRNA-1  | Japonica | Indica   |                                | Os04g0674100 | OsR498G0409478000.01.T02 | Sperm-associated antigen 1-like                                              |

|                                     |          |          |               |              |                          |                                                                              |
|-------------------------------------|----------|----------|---------------|--------------|--------------------------|------------------------------------------------------------------------------|
| maker-4-augustus-gene-290.15-mRNA-1 | Japonica | NA       |               |              | OsR498G0409483100.01.T01 | Zinc finger C3HC4 type (RING finger) family protein                          |
| maker-4-augustus-gene-290.25-mRNA-1 | Japonica | NA       |               | Os04g0675400 | OsR498G0409483700.01.T02 | J domain-containing protein (Fragment)                                       |
| maker-4-augustus-gene-290.27-mRNA-1 | Japonica | NA       |               | Os04g0676100 | OsR498G0409485100.01.T01 | Thioredoxin X chloroplastic                                                  |
| maker-4-augustus-gene-290.29-mRNA-1 | Japonica | NA       |               | Os04g0674300 | OsR498G0409478600.01.T02 | BTB/POZ domain-containing protein At3g19850                                  |
| maker-4-augustus-gene-290.32-mRNA-1 | Japonica | NA       |               | Os04g0674600 | OsR498G0409480000.01.T02 | Probable metal-nicotianamine transporter YSL10                               |
| maker-4-augustus-gene-290.33-mRNA-1 | Japonica | NA       |               | Os04g0674700 | OsR498G0409480000.01.T03 | probable acyl-activating enzyme 5, peroxisomal                               |
| maker-4-augustus-gene-290.40-mRNA-1 | Japonica | NA       |               | Os04g0674800 | OsR498G0409480600.01.T01 | Endoglucanase                                                                |
| maker-4-augustus-gene-290.42-mRNA-1 | Japonica | Indica   |               | Os04g0675000 | OsR498G0409481600.01.T02 |                                                                              |
| maker-4-augustus-gene-290.47-mRNA-1 | Japonica | NA       |               | Os04g0675500 | OsR498G0409484000.01.T01 | Dolichyl-diphosphooligosaccharide--protein glycotransferase                  |
| maker-4-augustus-gene-290.49-mRNA-1 | Japonica | NA       |               |              | OsR498G0409484600.01.T01 | FBD domain-containing protein                                                |
| maker-4-augustus-gene-290.51-mRNA-1 | Japonica | NA       |               |              | OsR498G0409485000.01.T02 | Plastid division protein CDP1 chloroplastic                                  |
| maker-4-augustus-gene-290.8-mRNA-1  | Japonica | NA       |               |              | OsR498G0409479100.01.T06 | S-acyltransferase                                                            |
| maker-4-augustus-gene-291.34-mRNA-1 | Japonica | NA       |               | Os04g0676300 | OsR498G0409485700.01.T04 | Dihydroorotate dehydrogenase (quinone), mitochondrial                        |
| maker-4-augustus-gene-291.38-mRNA-1 | Japonica | NA       |               | Os04g0677000 | OsR498G0409488500.01.T01 | PB1 domain-containing protein                                                |
| maker-4-augustus-gene-291.39-mRNA-1 | Japonica | Indica   |               | Os10g0489100 | OsR498G0409489300.01.T05 | Arginine methyltransferase 6                                                 |
| maker-4-augustus-gene-291.45-mRNA-1 | Japonica | NA       |               | Os04g0676600 | OsR498G0409486800.01.T02 | TF-B3 domain-containing protein                                              |
| maker-4-augustus-gene-291.47-mRNA-1 | Japonica | Indica   |               | Os04g0676600 | OsR498G0409487200.01.T01 | TF-B3 domain-containing protein                                              |
| maker-4-augustus-gene-291.49-mRNA-1 | Japonica | Indica   |               | Os04g0676700 | OsR498G0409487400.01.T03 | Transcription factor SRM1                                                    |
| maker-4-augustus-gene-291.52-mRNA-1 | Japonica | NA       |               | Os04g0676800 |                          |                                                                              |
| maker-4-augustus-gene-291.54-mRNA-1 | Japonica | NA       |               | Os04g0677400 | OsR498G0409491400.01.T01 | Alcohol dehydrogenase-like 6                                                 |
| maker-4-augustus-gene-291.57-mRNA-1 | Japonica | NA       |               | Os04g0677500 | OsR498G0409491600.01.T01 | Pyruvate kinase                                                              |
| maker-4-augustus-gene-292.30-mRNA-1 | Japonica | NA       |               | Os04g0678200 | OsR498G0409493100.01.T03 | Fiber protein Fb34                                                           |
| maker-4-augustus-gene-292.34-mRNA-1 | Japonica | NA       |               | Os04g0678300 | OsR498G0409493700.01.T02 | WD repeat-containing protein 44                                              |
| maker-4-augustus-gene-292.37-mRNA-1 | Japonica | NA       |               | Os04g0678700 | OsR498G0409495300.01.T01 | NADPH-protochlorophyllide oxidoreductase                                     |
| maker-4-augustus-gene-292.39-mRNA-1 | Japonica | NA       |               | Os04g0678800 | OsR498G0409495500.01.T01 | N-acetylglucosaminylphosphatidylinositol deacetylase                         |
| maker-4-augustus-gene-292.42-mRNA-1 | Japonica | NA       |               | Os04g0678900 | OsR498G0409495700.01.T01 | Polyol transporter 4                                                         |
| maker-4-augustus-gene-292.44-mRNA-1 | Japonica | NA       |               | Os04g0679000 | OsR498G0409495900.01.T01 | Polyol transporter like                                                      |
| maker-4-augustus-gene-292.46-mRNA-1 | Japonica | NA       |               | Os04g0679100 | OsR498G0409496700.01.T01 | Clathrin light chain                                                         |
| maker-4-augustus-gene-292.48-mRNA-1 | Japonica | NA       |               |              | OsR498G0409492400.01.T04 | Katanin p80 WD40 repeat-containing subunit B1 homolog                        |
| maker-4-augustus-gene-292.56-mRNA-1 | Japonica | NA       |               | Os04g0677800 | OsR498G0409492800.01.T06 | Translation elongation factor EF1A/initiation factor IF2gamma family protein |
| maker-4-augustus-gene-292.61-mRNA-1 | Japonica | NA       | Kinase-TM     | Os04g0679200 | OsR498G0409497000.01.T02 | Serine/threonine-protein kinase                                              |
| maker-4-augustus-gene-292.65-mRNA-1 | Japonica | Indica   |               | Os04g0679400 | OsR498G0409497600.01.T02 | Stem-specific protein TSJT1                                                  |
| maker-4-augustus-gene-292.68-mRNA-1 | Japonica | NA       |               | Os04g0679600 | OsR498G0409498400.01.T01 | CBS domain-containing protein CBSX5                                          |
| maker-4-augustus-gene-293.1-mRNA-1  | Japonica | Indica   |               | Os04g0679800 | OsR498G0409499500.01.T01 | ABA insensitive ring protein                                                 |
| maker-4-augustus-gene-293.15-mRNA-1 | Japonica | Indica   |               | Os04g0680700 | OsR498G0409501900.01.T02 | Smr domain-containing protein (Fragment)                                     |
| maker-4-augustus-gene-293.19-mRNA-1 | Japonica | Indica   |               | Os04g0680800 | OsR498G0409502100.01.T01 |                                                                              |
| maker-4-augustus-gene-293.22-mRNA-1 | Japonica | NA       |               | Os04g0681500 | OsR498G0409503100.01.T01 | Phosphomannomutase                                                           |
| maker-4-augustus-gene-293.24-mRNA-1 | Japonica | NA       |               | Os04g0679900 | OsR498G0409499800.01.T01 | tetraspanin-19 isoform X1                                                    |
| maker-4-augustus-gene-293.28-mRNA-1 | Japonica | NA       |               | Os04g0680300 | OsR498G0409501400.01.T01 | Cysteine-rich RLK (RECEPTOR-like protein kinase)40                           |
| maker-4-augustus-gene-293.31-mRNA-1 | Japonica | NA       |               |              | OsR498G0409501800.01.T02 | Tyrosyl-tRNA synthetase                                                      |
| maker-4-augustus-gene-293.34-mRNA-1 | Japonica | NA       |               | Os04g0681400 | OsR498G0409503000.01.T01 | Plasma-membrane choline transporter family protein                           |
| maker-4-augustus-gene-293.38-mRNA-1 | Japonica | NA       |               | Os04g0681600 | OsR498G0409503600.01.T01 | Plasma-membrane choline transporter family protein                           |
| maker-4-augustus-gene-293.42-mRNA-1 | Japonica | NA       |               | Os04g0681900 | OsR498G0409504800.01.T01 | Acyl-CoA-binding domain-containing protein 2                                 |
| maker-4-augustus-gene-293.5-mRNA-1  | Japonica | NA       |               | Os04g0680000 |                          | RNA polymerase II transcription factor B subunit 2                           |
| maker-4-augustus-gene-294.0-mRNA-1  | Japonica | NA       |               | Os04g0682100 | OsR498G0409505500.01.T01 | C2 calcium-dependent membrane targeting                                      |
| maker-4-augustus-gene-294.17-mRNA-1 | Japonica | Indica   |               | Os04g0683500 | OsR498G0409511300.01.T03 | A to I editase domain-containing protein (Fragment)                          |
| maker-4-augustus-gene-294.22-mRNA-1 | Japonica | NA       | Kinase-LRR-TM |              | OsR498G0409512300.01.T01 | Serine/threonine protein kinase                                              |
| maker-4-augustus-gene-294.28-mRNA-1 | Japonica | NA       |               |              | OsR498G0409505000.01.T01 | Glucan endo-1,3-beta-D-glucosidase                                           |
| maker-4-augustus-gene-294.31-mRNA-1 | Japonica | NA       |               | Os04g0682000 | OsR498G0409505200.01.T02 | Cysteine protease                                                            |
| maker-4-augustus-gene-294.37-mRNA-1 | Japonica | NA       |               | Os04g0674400 | OsR498G0409505400.01.T02 | Anamorsin homolog                                                            |
| maker-4-augustus-gene-294.4-mRNA-1  | Japonica | NA       |               | Os04g0682300 | OsR498G0409505900.01.T01 | Phosphomannomutase                                                           |
| maker-4-augustus-gene-294.45-mRNA-1 | Japonica | NA       |               | Os04g0682400 | OsR498G0409506200.01.T01 | Polyadenylate-binding protein, cytoplasmic and nuclear                       |
| maker-4-augustus-gene-294.47-mRNA-1 | Japonica | NA       |               | Os04g0682800 | OsR498G0409509800.01.T05 | K(+) efflux antiporter 2 chloroplastic                                       |
| maker-4-augustus-gene-294.55-mRNA-1 | Japonica | NA       |               | Os04g0682900 | OsR498G0409510000.01.T05 | MUTsd domain-containing protein                                              |
| maker-4-augustus-gene-294.60-mRNA-1 | Japonica | Japonica |               | Os04g0683100 | OsR498G0409510200.01.T01 | Pre-mRNA cleavage factor Im 25 kDa subunit                                   |
| maker-4-augustus-gene-294.64-mRNA-1 | Japonica | NA       | OsAAE3        | Os04g0683700 | OsR498G0409512600.01.T01 | 4-coumarate--CoA ligase-like 10                                              |
| maker-4-augustus-gene-294.9-mRNA-1  | Japonica | NA       |               | Os04g0682500 | OsR498G0409506500.01.T02 | Threonine aspartase subunit beta                                             |
| maker-4-augustus-gene-295.30-mRNA-1 | Japonica | NA       |               | Os04g0683800 | OsR498G0409512900.01.T01 | FT-interacting protein 1-like                                                |
| maker-4-augustus-gene-295.31-mRNA-1 | Japonica | Indica   |               | Os02g0664000 | OsR498G0409513100.01.T01 | Glutathione peroxidase                                                       |
| maker-4-augustus-gene-295.40-mRNA-1 | Japonica | NA       |               |              | OsR498G0409514700.01.T03 | Casparian strip membrane protein 1                                           |
| maker-4-augustus-gene-295.42-mRNA-1 | Japonica | NA       |               | Os04g0684500 | OsR498G0409515900.01.T03 | RRM domain-containing protein (Fragment)                                     |

|                                     |          |        |               |              |                          |                                                                          |
|-------------------------------------|----------|--------|---------------|--------------|--------------------------|--------------------------------------------------------------------------|
| maker-4-augustus-gene-295.49-mRNA-1 | Japonica | Indica |               | Os04g0684800 | OsR498G0409516700.01.T01 | Ubiquitin-conjugating enzyme variant                                     |
| maker-4-augustus-gene-295.51-mRNA-1 | Japonica | NA     |               | Os04g0683900 | OsR498G0409513400.01.T01 | AT-hook motif nuclear-localized protein (Fragment)                       |
| maker-4-augustus-gene-295.54-mRNA-1 | Japonica | NA     |               | Os04g0685100 | OsR498G0409518400.01.T01 | Ribosome biogenesis regulatory protein (Fragment)                        |
| maker-4-augustus-gene-296.0-mRNA-1  | Japonica | NA     |               | Os04g0685800 | OsR498G0409520700.01.T01 | Diadenosine and diphosphoinositol polyphosphate phosphohydrolase         |
| maker-4-augustus-gene-296.10-mRNA-1 | Japonica | NA     |               | Os04g0686200 | OsR498G0409524000.01.T02 | Regulator of chromosome condensation (RCC1) family with FYVE zinc finger |
| maker-4-augustus-gene-296.14-mRNA-1 | Japonica | NA     |               | Os04g0686300 | OsR498G0409524400.01.T01 | UTP--glucose-1-phosphate uridylyltransferase isoform 1                   |
| maker-4-augustus-gene-296.16-mRNA-1 | Japonica | NA     | Kinase        |              | OsR498G0409524600.01.T05 | Serine/threonine-protein kinase atg1t                                    |
| maker-4-augustus-gene-296.2-mRNA-1  | Japonica | NA     |               | Os04g0685500 | OsR498G0409520200.01.T06 | Exocyst subunit Exo70 family protein (Fragment)                          |
| maker-4-augustus-gene-296.20-mRNA-1 | Japonica | NA     | Kinase-TM     |              | OsR498G0409524800.01.T04 | Serine/threonine-protein kinase STY46                                    |
| maker-4-augustus-gene-296.6-mRNA-1  | Japonica | NA     |               |              |                          |                                                                          |
| maker-4-augustus-gene-296.8-mRNA-1  | Japonica | NA     | Kinase-LRR-TM | Os04g0685900 | OsR498G0409521200.01.T01 | Receptor-like kinase TMK3                                                |
| maker-4-augustus-gene-297.42-mRNA-1 | Japonica | Indica |               | Os04g0687200 | OsR498G0409527100.01.T01 | Transmembrane protein, putative                                          |
| maker-4-augustus-gene-297.47-mRNA-1 | Japonica | NA     |               | Os04g0687900 | OsR498G0409528900.01.T06 | Tubby-like F-box protein 7                                               |
| maker-4-augustus-gene-297.51-mRNA-1 | Japonica | NA     |               | Os04g0687100 | OsR498G0409526800.01.T02 | Soluble inorganic pyrophosphatase                                        |
| maker-4-augustus-gene-297.55-mRNA-1 | Japonica | NA     |               | Os04g0687300 | OsR498G0409527400.01.T01 | J domain-containing protein (Fragment)                                   |
| maker-4-augustus-gene-297.59-mRNA-1 | Japonica | NA     |               | Os04g0688100 | OsR498G0409529600.01.T01 | Peroxidase                                                               |
| maker-4-augustus-gene-297.60-mRNA-1 | Japonica | NA     |               | Os04g0688200 | OsR498G0409529600.01.T03 | Peroxidase                                                               |
| maker-4-augustus-gene-298.34-mRNA-1 | Japonica | NA     | Kinase-TM     | Os04g0689400 | OsR498G0409533700.01.T01 | Serine/threonine protein kinase                                          |
| maker-4-augustus-gene-298.39-mRNA-1 | Japonica | NA     |               | Os04g0689500 | OsR498G0409533900.01.T01 | Late embryogenesis abundant protein, LEA-14                              |
| maker-4-augustus-gene-298.41-mRNA-1 | Japonica | NA     |               | Os04g0689700 | OsR498G0409534300.01.T03 | RRM domain-containing protein (Fragment)                                 |
| maker-4-augustus-gene-298.44-mRNA-1 | Japonica | NA     |               | Os04g0689800 |                          | RRM domain-containing protein                                            |
| maker-4-augustus-gene-298.47-mRNA-1 | Japonica | NA     |               | Os04g0689900 | OsR498G0409535100.01.T01 | Pathogenesis-related protein 5                                           |
| maker-4-augustus-gene-298.49-mRNA-1 | Japonica | NA     |               | Os04g0690100 | OsR498G0409535900.01.T01 | C2H2-type domain-containing protein (Fragment)                           |
| maker-4-augustus-gene-298.53-mRNA-1 | Japonica | NA     |               |              |                          | Strictosidine synthase 3                                                 |
| maker-4-augustus-gene-298.55-mRNA-1 | Japonica | NA     |               | Os04g0689300 | OsR498G0409533400.01.T01 | PI-PLC X domain-containing protein                                       |
| maker-4-augustus-gene-299.32-mRNA-1 | Japonica | NA     |               |              | OsR498G0409536100.01.T01 | Small glutamine-rich tetratricopeptide repeat-containing protein beta    |
| maker-4-augustus-gene-299.37-mRNA-1 | Japonica | NA     |               | Os04g0690400 | OsR498G0409536500.01.T01 |                                                                          |
| maker-4-augustus-gene-299.40-mRNA-1 | Japonica | NA     |               | Os04g0690500 | OsR498G0409536900.01.T02 | Putative E3 ubiquitin-protein ligase makorin-2 (Fragment)                |
| maker-4-augustus-gene-299.42-mRNA-1 | Japonica | NA     | Kinase-TM     | Os04g0691100 | OsR498G0409538500.01.T02 | Serine/threonine-protein kinase SAPK5                                    |
| maker-4-augustus-gene-299.45-mRNA-1 | Japonica | NA     |               | Os04g0691400 | OsR498G0409539100.01.T01 | Putative peptide transporter                                             |
| maker-4-augustus-gene-299.47-mRNA-1 | Japonica | NA     |               |              | OsR498G0409539700.01.T02 | Importin N-terminal domain-containing protein                            |
| maker-4-augustus-gene-299.55-mRNA-1 | Japonica | NA     |               |              | OsR498G0409537200.01.T02 | Auxin response factor                                                    |
| maker-4-augustus-gene-299.59-mRNA-1 | Japonica | NA     |               |              | OsR498G0409540400.01.T01 | Increased DNA methylation 1                                              |
| maker-4-augustus-gene-3.27-mRNA-1   | Japonica | Indica |               | Os01g0612500 | OsR498G0407633300.01.T01 | Acyl-protein thioesterase 2                                              |
| maker-4-augustus-gene-3.31-mRNA-1   | Japonica | NA     |               |              |                          | AAI domain-containing protein                                            |
| maker-4-augustus-gene-3.33-mRNA-1   | Japonica | NA     |               |              | OsR498G0407633800.01.T02 | CRC domain-containing protein                                            |
| maker-4-augustus-gene-300.0-mRNA-1  | Japonica | NA     |               | Os04g0691900 | OsR498G0409541500.01.T03 | 1-phosphatidylinositol-3-phosphate 5-kinase                              |
| maker-4-augustus-gene-300.10-mRNA-1 | Japonica | NA     |               |              | OsR498G0409543100.01.T01 | Ribonuclease P                                                           |
| maker-4-augustus-gene-300.15-mRNA-1 | Japonica | NA     |               |              | OsR498G0409544100.01.T01 | Farnesylcysteine lyase                                                   |
| maker-4-augustus-gene-300.20-mRNA-1 | Japonica | NA     |               |              |                          | Chloroplast processing peptidase                                         |
| maker-4-augustus-gene-300.23-mRNA-1 | Japonica | NA     |               |              | OsR498G0409545100.01.T02 | Protein kinase domain-containing protein                                 |
| maker-4-augustus-gene-300.28-mRNA-1 | Japonica | NA     |               | Os04g0692000 | OsR498G0409541800.01.T04 | UDP-galactose transporter 1                                              |
| maker-4-augustus-gene-300.3-mRNA-1  | Japonica | NA     |               | Os04g0692200 | OsR498G0409542100.01.T02 | BTB/POZ domain-containing protein TNFAIP1 isoform 2                      |
| maker-4-augustus-gene-300.31-mRNA-1 | Japonica | NA     |               |              | OsR498G0409542000.01.T05 | Putative CAP Gly-rich domain-containing protein                          |
| maker-4-augustus-gene-300.36-mRNA-1 | Japonica | NA     |               | Os04g0692300 | OsR498G0409542400.01.T06 | RING-CH-type domain-containing protein (Fragment)                        |
| maker-4-augustus-gene-300.41-mRNA-1 | Japonica | NA     |               |              | OsR498G0409543600.01.T01 | Chromatin remodeling 24                                                  |
| maker-4-augustus-gene-300.46-mRNA-1 | Japonica | NA     |               |              | OsR498G0409543800.01.T02 | Putative DNA helicase chromatin remodeling SNF2 family                   |
| maker-4-augustus-gene-300.53-mRNA-1 | Japonica | NA     |               |              | OsR498G0409545000.01.T03 | Probable magnesium transporter                                           |
| maker-4-augustus-gene-300.56-mRNA-1 | Japonica | NA     |               |              | OsR498G0409545000.01.T05 | 4HBT domain-containing protein                                           |
| maker-4-augustus-gene-300.58-mRNA-1 | Japonica | NA     |               |              | OsR498G0409545800.01.T02 | Ras-related protein RABC1                                                |
| maker-4-augustus-gene-300.62-mRNA-1 | Japonica | NA     |               |              | OsR498G0409546000.01.T02 | NAC transcription factor                                                 |
| maker-4-augustus-gene-300.65-mRNA-1 | Japonica | NA     |               |              | OsR498G0409547200.01.T03 | Exostosis domain-containing protein                                      |
| maker-4-augustus-gene-300.7-mRNA-1  | Japonica | NA     |               | Os04g0692400 | OsR498G0409542700.01.T04 | probable methyltransferase PMT26                                         |
| maker-4-augustus-gene-301.0-mRNA-1  | Japonica | Indica | Kinase-TM     | Os08g0112500 | OsR498G0409548500.01.T02 | probable serine/threonine-protein kinase At1g54610                       |
| maker-4-augustus-gene-301.10-mRNA-1 | Japonica | NA     |               |              | OsR498G0409550300.01.T01 | Dolichyl-diphosphooligosaccharide--protein glycosyltransferase subunit 1 |
| maker-4-augustus-gene-301.15-mRNA-1 | Japonica | NA     |               |              | OsR498G0409550500.01.T02 | Histone-lysine N-methyltransferase SUV4                                  |
| maker-4-augustus-gene-301.19-mRNA-1 | Japonica | NA     |               |              | OsR498G0409551300.01.T07 | Protein kinase domain-containing protein                                 |
| maker-4-augustus-gene-301.37-mRNA-1 | Japonica | NA     |               | Os03g0340600 |                          |                                                                          |
| maker-4-augustus-gene-301.39-mRNA-1 | Japonica | NA     |               |              | OsR498G0409551300.01.T08 | Protein kinase domain-containing protein                                 |
| maker-4-augustus-gene-301.8-mRNA-1  | Japonica | Indica |               | Os05g0420600 | OsR498G0409549500.01.T01 | Cytochrome c, class IA/ IB                                               |
| maker-4-augustus-gene-31.39-mRNA-1  | Japonica | Indica | Kinase-TM     | Os11g0692100 | OsR498G0407758000.01.T01 | Receptor kinase MRKa                                                     |



|                                    |          |          |                  |              |                          |                                                                          |
|------------------------------------|----------|----------|------------------|--------------|--------------------------|--------------------------------------------------------------------------|
| maker-4-augustus-gene-33.11-mRNA-1 | Japonica | NA       |                  | Os04g0223901 | OsR498G0407762400.01.T01 | Flavin-containing monooxygenase                                          |
| maker-4-augustus-gene-34.0-mRNA-1  | Japonica | NA       |                  | Os04g0224600 | OsR498G0407764000.01.T02 | SEC1 family transport protein SLY1-like                                  |
| maker-4-augustus-gene-35.0-mRNA-1  | Japonica | NA       |                  |              | OsR498G0407768100.01.T01 | Transcription factor RAX1                                                |
| maker-4-augustus-gene-35.2-mRNA-1  | Japonica | NA       | Kinase-LRR-TM    |              | OsR498G0407776100.01.T01 | Putative LRR receptor-like serine/threonine-protein kinase               |
| maker-4-augustus-gene-35.20-mRNA-1 | Japonica | NA       | Kinase-TM        | Os04g0226600 | OsR498G0407773100.01.T02 | Non-specific serine/threonine protein kinase (Fragment)                  |
| maker-4-augustus-gene-35.3-mRNA-1  | Japonica | NA       | Kinase-LRR-TM    |              |                          | Putative LRR receptor-like serine/threonine-protein kinase               |
| maker-4-augustus-gene-36.31-mRNA-1 | Japonica | NA       |                  | Os04g0227500 | OsR498G0407777300.01.T02 | DSBA-like thioredoxin domain containing protein                          |
| maker-4-augustus-gene-4.27-mRNA-1  | Japonica | NA       |                  | Os04g0175600 | OsR498G0407636100.01.T01 | Putative inactive methyltransferase                                      |
| maker-4-augustus-gene-4.30-mRNA-1  | Japonica | Japonica |                  | Os04g0175900 | OsR498G0407637100.01.T01 | Putative inactive methyltransferase                                      |
| maker-4-augustus-gene-4.33-mRNA-1  | Japonica | Indica   |                  | Os04g0176200 | OsR498G0407637400.01.T01 | Putative inactive methyltransferase                                      |
| maker-4-augustus-gene-4.36-mRNA-1  | Japonica | NA       |                  | Os04g0176400 | OsR498G0407639200.01.T02 | Serine carboxypeptidase-like 18 isoform X3                               |
| maker-4-augustus-gene-4.41-mRNA-1  | Japonica | Japonica |                  | Os04g0177100 | OsR498G0407640600.01.T01 | Gnk2-homologous domain-containing protein                                |
| maker-4-augustus-gene-41.4-mRNA-1  | Japonica | NA       |                  | Os04g0244500 | OsR498G0407815300.01.T06 | Methyltransferase                                                        |
| maker-4-augustus-gene-47.23-mRNA-1 | Japonica | Japonica |                  | Os04g0253000 | OsR498G0407841500.01.T01 | H15 domain-containing protein                                            |
| maker-4-augustus-gene-5.2-mRNA-1   | Japonica | NA       |                  | Os04g0177300 | OsR498G0407640800.01.T01 | SWI/SNF-related matrix-associated actin-dependent regulator of chromatin |
| maker-4-augustus-gene-5.5-mRNA-1   | Japonica | NA       |                  | Os03g0117200 | OsR498G0305124300.01.T01 | HTP reductase                                                            |
| maker-4-augustus-gene-5.7-mRNA-1   | Japonica | NA       |                  |              |                          | Actin-related protein 9                                                  |
| maker-4-augustus-gene-55.36-mRNA-1 | Japonica | NA       |                  | Os04g0266900 | OsR498G0407887500.01.T01 | Transketolase                                                            |
| maker-4-augustus-gene-55.39-mRNA-1 | Japonica | NA       |                  |              |                          | Calcium-binding outer membrane-like protein                              |
| maker-4-augustus-gene-56.0-mRNA-1  | Japonica | NA       |                  | Os04g0269100 | OsR498G0407896300.01.T01 | Tropinone reductase                                                      |
| maker-4-augustus-gene-57.36-mRNA-1 | Japonica | Indica   |                  | Os04g0269600 | OsR498G0407897300.01.T01 | Amine oxidase                                                            |
| maker-4-augustus-gene-57.42-mRNA-1 | Japonica | NA       |                  |              |                          | Isoamyl acetate-hydrolyzing esterase                                     |
| maker-4-augustus-gene-57.45-mRNA-1 | Japonica | Indica   |                  | Os04g0270100 | OsR498G0407899500.01.T05 | Eukaryotic peptide chain release factor GTP-binding subunit ERF3A        |
| maker-4-augustus-gene-57.51-mRNA-1 | Japonica | NA       |                  | Os04g0270200 | OsR498G0407900000.01.T01 | ER membrane protein complex subunit                                      |
| maker-4-augustus-gene-58.0-mRNA-1  | Japonica | NA       |                  | Os04g0271200 | OsR498G0407902900.01.T02 | Very-long-chain (3R)-3-hydroxyacyl-CoA dehydratase                       |
| maker-4-augustus-gene-58.6-mRNA-1  | Japonica | NA       |                  | Os04g0271000 | OsR498G0407902400.01.T03 | NAD-dependent deacetylase sirtuin-6                                      |
| maker-4-augustus-gene-59.38-mRNA-1 | Japonica | NA       |                  |              | OsR498G0407908500.01.T01 | Glycosyltransferase                                                      |
| maker-4-augustus-gene-59.40-mRNA-1 | Japonica | NA       |                  |              | OsR498G0407909200.01.T01 | MBD domain-containing protein (Fragment)                                 |
| maker-4-augustus-gene-6.39-mRNA-1  | Japonica | NA       |                  | Os04g0179200 | OsR498G0407645200.01.T01 | Momilactone synthase like                                                |
| maker-4-augustus-gene-60.25-mRNA-1 | Japonica | Indica   |                  | Os11g0131900 | OsR498G0407911400.01.T01 | Non-reducing end alpha-L-arabinofuranosidase                             |
| maker-4-augustus-gene-60.27-mRNA-1 | Japonica | NA       |                  | Os04g0274400 | OsR498G0407911800.01.T01 | Chromatin-remodeling complex subunit ies6                                |
| maker-4-augustus-gene-61.30-mRNA-1 | Japonica | NA       |                  | Os04g0276600 | OsR498G0407919400.01.T03 | SASA domain-containing protein (Fragment)                                |
| maker-4-augustus-gene-62.38-mRNA-1 | Japonica | NA       |                  | Os04g0278000 | OsR498G0407921500.01.T01 | BTB/POZ domain-containing protein At2g13690                              |
| maker-4-augustus-gene-62.41-mRNA-1 | Japonica | Indica   |                  | Os04g0278200 | OsR498G0407922700.01.T01 | kinesin light chain 3 isoform X3                                         |
| maker-4-augustus-gene-62.48-mRNA-1 | Japonica | Japonica |                  | Os04g0278101 | OsR498G0307345500.01.T01 | Tol-Pal system beta propeller repeat-containing protein                  |
| maker-4-augustus-gene-62.50-mRNA-1 | Japonica | NA       |                  |              | OsR498G0407924400.01.T01 | FMN-linked oxidoreductase superfamily protein                            |
| maker-4-augustus-gene-63.10-mRNA-1 | Japonica | NA       |                  | Os04g0281900 | OsR498G0407929700.01.T01 |                                                                          |
| maker-4-augustus-gene-63.15-mRNA-1 | Japonica | NA       |                  |              | OsR498G0407927600.01.T01 | Myzus persicae-induced lipase 1                                          |
| maker-4-augustus-gene-65.42-mRNA-1 | Japonica | NA       |                  | Os04g0284600 | OsR498G0407941200.01.T01 | 26S proteasome regulatory subunit 6A homolog A                           |
| maker-4-augustus-gene-66.41-mRNA-1 | Japonica | NA       | Kinase-TM        | Os04g0286000 | OsR498G0407941200.01.T01 | Calcium binding EGF domain containing protein, expressed                 |
| maker-4-augustus-gene-67.0-mRNA-1  | Japonica | NA       |                  | Os04g0287400 | OsR498G0407949900.01.T01 | WRKY transcription factor                                                |
| maker-4-augustus-gene-68.42-mRNA-1 | Japonica | NA       | Kinase-TM        | Os04g0288500 | OsR498G0407951200.01.T01 | Putative receptor-type protein kinase LRK1                               |
| maker-4-augustus-gene-69.31-mRNA-1 | Japonica | Indica   |                  | Os05g0102600 | OsR498G0407952500.01.T01 | RING-type E3 ubiquitin transferase                                       |
| maker-4-augustus-gene-69.33-mRNA-1 | Japonica | NA       |                  | Os03g0340600 |                          |                                                                          |
| maker-4-augustus-gene-69.35-mRNA-1 | Japonica | NA       |                  |              | OsR498G1120660600.01.T01 | Trehalose 6-phosphate phosphatase                                        |
| maker-4-augustus-gene-69.37-mRNA-1 | Japonica | NA       |                  |              | OsR498G0407953300.01.T04 | Root UVB sensitive family                                                |
| maker-4-augustus-gene-69.39-mRNA-1 | Japonica | NA       |                  |              | OsR498G0407953300.01.T05 | Root UVB sensitive family                                                |
| maker-4-augustus-gene-69.41-mRNA-1 | Japonica | NA       |                  | Os07g0513300 | OsR498G1120703200.01.T01 | PMD domain-containing protein (Fragment)                                 |
| maker-4-augustus-gene-69.43-mRNA-1 | Japonica | Japonica |                  | Os04g0291000 | OsR498G0407953700.01.T06 | Short-chain dehydrogenase TIC 32, chloroplastic                          |
| maker-4-augustus-gene-69.49-mRNA-1 | Japonica | NA       |                  | Os04g0291100 | OsR498G0407953900.01.T04 | Short-chain dehydrogenase                                                |
| maker-4-augustus-gene-7.28-mRNA-1  | Japonica | NA       |                  | Os04g0180400 | OsR498G0407648100.01.T01 |                                                                          |
| maker-4-augustus-gene-7.30-mRNA-1  | Japonica | NA       |                  | Os04g0179700 | OsR498G0407647400.01.T01 | Ent-kaurene synthase                                                     |
| maker-4-augustus-gene-70.0-mRNA-1  | Japonica | Japonica | CC-Kinase-LRR-TM | Os04g0291900 | OsR498G0510192800.01.T08 | Non-specific serine/threonine protein kinase                             |
| maker-4-augustus-gene-71.2-mRNA-1  | Japonica | NA       |                  | Os04g0293700 |                          |                                                                          |
| maker-4-augustus-gene-72.31-mRNA-1 | Japonica | NA       |                  | Os04g0295100 | OsR498G0407958700.01.T02 | Ribonuclease P                                                           |
| maker-4-augustus-gene-73.0-mRNA-1  | Japonica | Indica   |                  | Os04g0295400 | OsR498G0407964300.01.T02 | Jacalin-type lectin domain-containing protein                            |
| maker-4-augustus-gene-74.0-mRNA-1  | Japonica | NA       |                  |              | OsR498G0407974200.01.T02 | Metal tolerance protein C4                                               |
| maker-4-augustus-gene-75.19-mRNA-1 | Japonica | Indica   |                  | Os04g0298600 | OsR498G0407974700.01.T01 | FPL domain-containing protein                                            |
| maker-4-augustus-gene-75.24-mRNA-1 | Japonica | NA       |                  |              | OsR498G0407975600.01.T01 | Clp amino terminal domain-containing protein                             |
| maker-4-augustus-gene-77.0-mRNA-1  | Japonica | Indica   |                  | Os04g0300600 | OsR498G0407987600.01.T01 | Basic helix-loop-helix transcription factor                              |
| maker-4-augustus-gene-77.2-mRNA-1  | Japonica | NA       |                  | Os04g0301500 | OsR498G0407993000.01.T01 | BHLH transcription factor                                                |

|                                    |          |          |           |              |                          |                                                  |
|------------------------------------|----------|----------|-----------|--------------|--------------------------|--------------------------------------------------|
| maker-4-augustus-gene-78.0-mRNA-1  | Japonica | NA       |           | Os04g0301700 | OsR498G0407995000.01.T02 | Beta-glucuronosyltransferase GlcAT14A isoform A  |
| maker-4-augustus-gene-78.3-mRNA-1  | Japonica | NA       | Kinase-TM | Os04g0303500 | OsR498G0408000400.01.T01 | Receptor-like serine/threonine-protein kinase    |
| maker-4-augustus-gene-79.0-mRNA-1  | Japonica | NA       |           | Os04g0303900 | OsR498G0408002900.01.T01 | tRNA-binding domain-containing protein           |
| maker-4-augustus-gene-79.12-mRNA-1 | Japonica | NA       |           | Os04g0304000 | OsR498G0408003400.01.T01 |                                                  |
| maker-4-augustus-gene-79.14-mRNA-1 | Japonica | NA       | Kinase-TM |              |                          | Putative LOV domain-containing protein           |
| maker-4-augustus-gene-79.2-mRNA-1  | Japonica | NA       |           | Os04g0304400 | OsR498G0408005300.01.T01 | MADS-box transcription factor 25                 |
| maker-4-augustus-gene-79.5-mRNA-1  | Japonica | NA       |           |              | OsR498G0408003200.01.T05 | Exonuclease                                      |
| maker-4-augustus-gene-8.0-mRNA-1   | Japonica | NA       |           | Os04g0182200 | OsR498G0407654100.01.T01 | Putative 2-oxoacid dependent dioxygenase         |
| maker-4-augustus-gene-8.2-mRNA-1   | Japonica | NA       |           | Os04g0181100 | OsR498G0407651000.01.T01 | HR-like lesion-inducing protein-related          |
| maker-4-augustus-gene-81.0-mRNA-1  | Japonica | NA       |           | Os04g0307200 | OsR498G0408012900.01.T02 | J domain-containing protein                      |
| maker-4-augustus-gene-81.11-mRNA-1 | Japonica | NA       |           |              |                          | RRM domain-containing protein                    |
| maker-4-augustus-gene-82.36-mRNA-1 | Japonica | NA       |           |              | OsR498G0408016100.01.T02 |                                                  |
| maker-4-augustus-gene-82.49-mRNA-1 | Japonica | NA       |           | Os04g0309900 | OsR498G0408020900.01.T01 | Phytase                                          |
| maker-4-augustus-gene-83.34-mRNA-1 | Japonica | NA       |           | Os04g0308600 | OsR498G0408020900.01.T01 | Phytase                                          |
| maker-4-augustus-gene-83.36-mRNA-1 | Japonica | NA       |           | Os04g0308401 | OsR498G0408024700.01.T01 | Jasmonate-induced protein                        |
| maker-4-augustus-gene-83.38-mRNA-1 | Japonica | NA       |           |              | OsR498G0408024900.01.T01 |                                                  |
| maker-4-augustus-gene-83.40-mRNA-1 | Japonica | NA       |           |              |                          | Wall-associated receptor kinase 5                |
| maker-4-augustus-gene-83.42-mRNA-1 | Japonica | NA       |           | Os04g0310000 |                          |                                                  |
| maker-4-augustus-gene-83.49-mRNA-1 | Japonica | Indica   |           | Os04g0310500 | OsR498G0408025600.01.T01 | NADH-ubiquinone oxidoreductase 10.5 kDa subunit  |
| maker-4-augustus-gene-83.51-mRNA-1 | Japonica | Indica   |           | Os04g0310700 | OsR498G0408026400.01.T01 | 4-coumarate--CoA ligase-like protein 1           |
| maker-4-augustus-gene-84.0-mRNA-1  | Japonica | Indica   |           | Os02g0469300 | OsR498G0408027100.01.T02 | Protein MICRORCHIDIA 4 isoform A                 |
| maker-4-augustus-gene-84.9-mRNA-1  | Japonica | Indica   |           | Os04g0311500 | OsR498G0408028800.01.T02 | GTD-binding domain-containing protein (Fragment) |
| maker-4-augustus-gene-87.22-mRNA-1 | Japonica | NA       |           |              |                          | Transposon protein, putative, Mutator sub-class  |
| maker-4-augustus-gene-89.0-mRNA-1  | Japonica | NA       |           | Os04g0329500 | OsR498G0408052500.01.T02 | DUF295 domain-containing protein (Fragment)      |
| maker-4-augustus-gene-9.22-mRNA-1  | Japonica | NA       |           |              |                          | Transmembrane protein, putative                  |
| maker-4-augustus-gene-9.29-mRNA-1  | Japonica | NA       |           | Os04g0182900 | OsR498G0407657100.01.T01 | Amidase domain-containing protein (Fragment)     |
| maker-4-augustus-gene-9.31-mRNA-1  | Japonica | NA       |           |              | OsR498G0407658300.01.T01 | Amidase domain-containing protein (Fragment)     |
| maker-4-augustus-gene-9.32-mRNA-1  | Japonica | NA       |           | Os04g0183500 | OsR498G0407659900.01.T01 | Amidase domain-containing protein (Fragment)     |
| maker-4-augustus-gene-9.37-mRNA-1  | Japonica | NA       |           | Os04g0182800 | OsR498G0407656600.01.T02 | Electron transfer flavoprotein subunit beta      |
| maker-4-augustus-gene-9.40-mRNA-1  | Japonica | NA       |           | Os04g0183100 | OsR498G0407658000.01.T02 |                                                  |
| maker-4-augustus-gene-9.41-mRNA-1  | Japonica | NA       |           |              |                          | NAF domain-containing protein                    |
| maker-4-augustus-gene-99.39-mRNA-1 | Japonica | NA       |           |              | OsR498G1119933000.01.T01 |                                                  |
| maker-5-augustus-gene-10.40-mRNA-1 | Japonica | NA       |           |              | OsR498G0509613700.01.T03 | PRESSED FLOWER b                                 |
| maker-5-augustus-gene-10.42-mRNA-1 | Japonica | NA       |           |              | OsR498G0509616300.01.T01 | Sister chromatid cohesion protein DCC1           |
| maker-5-augustus-gene-10.45-mRNA-1 | Japonica | NA       |           | Os05g0119100 | OsR498G0509614800.01.T01 | SEA domain-containing protein                    |
| maker-5-augustus-gene-10.47-mRNA-1 | Japonica | NA       |           | Os05g0119200 | OsR498G0509615200.01.T01 | Glycine and proline rich protein 1               |
| maker-5-augustus-gene-10.49-mRNA-1 | Japonica | NA       |           | Os05g0119300 | OsR498G0509615400.01.T02 | Glycine and proline rich protein 1               |
| maker-5-augustus-gene-10.51-mRNA-1 | Japonica | NA       |           |              | OsR498G0509616000.01.T01 | NAB domain-containing protein (Fragment)         |
| maker-5-augustus-gene-10.54-mRNA-1 | Japonica | NA       |           |              | OsR498G0509616600.01.T01 | WEB family protein, chloroplastic                |
| maker-5-augustus-gene-10.56-mRNA-1 | Japonica | NA       |           | Os05g0120100 | OsR498G0509618800.01.T01 | Alternative splicing regulator                   |
| maker-5-augustus-gene-11.28-mRNA-1 | Japonica | Indica   |           | Os03g0281600 | OsR498G0509621700.01.T01 | Cation-transporting P-type ATPase                |
| maker-5-augustus-gene-11.33-mRNA-1 | Japonica | NA       |           | Os05g0120800 | OsR498G0509622300.01.T01 |                                                  |
| maker-5-augustus-gene-11.35-mRNA-1 | Japonica | NA       |           | Os05g0121000 | OsR498G0509623500.01.T04 | Transmembrane protein, putative                  |
| maker-5-augustus-gene-11.38-mRNA-1 | Japonica | Indica   |           | Os12g0148600 | OsR498G0509623900.01.T03 |                                                  |
| maker-5-augustus-gene-11.43-mRNA-1 | Japonica | NA       |           | Os05g0121400 |                          | Transcription factor IIIA                        |
| maker-5-augustus-gene-11.45-mRNA-1 | Japonica | NA       |           | Os05g0121200 | OsR498G0509624200.01.T01 | Thylakoid membrane protein TERC chloroplastic    |
| maker-5-augustus-gene-11.48-mRNA-1 | Japonica | NA       |           |              | OsR498G0509626400.01.T06 | Transcription factor AP2                         |
| maker-5-augustus-gene-12.0-mRNA-1  | Japonica | NA       |           | Os05g0121800 | OsR498G0509627500.01.T02 | Monothiol glutaredoxin-S17                       |
| maker-5-augustus-gene-12.10-mRNA-1 | Japonica | NA       |           | Os05g0122600 | OsR498G0509630100.01.T05 | Interactor of constitutive active ROPs           |
| maker-5-augustus-gene-12.12-mRNA-1 | Japonica | NA       |           |              | OsR498G0509631100.01.T01 | Tetraspanin-3                                    |
| maker-5-augustus-gene-12.14-mRNA-1 | Japonica | NA       |           | Os05g0121700 | OsR498G0509627400.01.T05 | DNA repair protein RAD 2                         |
| maker-5-augustus-gene-12.17-mRNA-1 | Japonica | NA       |           | Os05g0121900 | OsR498G0509627800.01.T01 | Sugar phosphate/phosphate translocator           |
| maker-5-augustus-gene-12.21-mRNA-1 | Japonica | Indica   |           | Os05g0122900 | OsR498G0509631400.01.T01 | Sensor protein kinase Walk (Fragment)            |
| maker-5-augustus-gene-12.7-mRNA-1  | Japonica | NA       |           |              | OsR498G0509629300.01.T01 | HECT domain-containing protein (Fragment)        |
| maker-5-augustus-gene-13.0-mRNA-1  | Japonica | NA       |           | Os05g0123100 | OsR498G0509633500.01.T02 | Glycosyltransferases                             |
| maker-5-augustus-gene-13.7-mRNA-1  | Japonica | NA       |           |              |                          |                                                  |
| maker-5-augustus-gene-13.9-mRNA-1  | Japonica | NA       |           |              | OsR498G0509635000.01.T01 | Exonuclease V chloroplastic                      |
| maker-5-augustus-gene-14.34-mRNA-1 | Japonica | NA       |           | Os05g0125000 | OsR498G0509643900.01.T01 | E3 SUMO-protein ligase SIZ1                      |
| maker-5-augustus-gene-14.39-mRNA-1 | Japonica | Japonica | Kinase-TM | Os05g0125300 | OsR498G0509647100.01.T01 | Receptor-like kinase LIP2                        |
| maker-5-augustus-gene-14.42-mRNA-1 | Japonica | Japonica | Kinase    | Os05g0125400 | OsR498G0509647700.01.T01 | Receptor-like kinase LIP2                        |
| maker-5-augustus-gene-14.48-mRNA-1 | Japonica | NA       |           |              | OsR498G0509643200.01.T01 |                                                  |

|                                     |          |          |               |              |                          |                                                                               |
|-------------------------------------|----------|----------|---------------|--------------|--------------------------|-------------------------------------------------------------------------------|
| maker-5-augustus-gene-14.50-mRNA-1  | Japonica | NA       |               | Os05g0125500 | OsR498G0509648000.01.T05 | Isovaleryl-CoA dehydrogenase mitochondrial                                    |
| maker-5-augustus-gene-141.23-mRNA-1 | Japonica | NA       |               | Os05g0306000 | OsR498G0510414800.01.T01 | GOLD domain-containing protein                                                |
| maker-5-augustus-gene-141.6-mRNA-1  | Japonica | NA       |               | Os05g0305200 | OsR498G0510412100.01.T01 | TRAF-type domain-containing protein                                           |
| maker-5-augustus-gene-141.9-mRNA-1  | Japonica | NA       | Kinase-LRR-TM |              | OsR498G0510414500.01.T01 | Serine/threonine protein kinase                                               |
| maker-5-augustus-gene-143.0-mRNA-1  | Japonica | NA       |               |              | OsR498G0510418900.01.T01 | Hippocampus abundant transcript 1 protein isoform B                           |
| maker-5-augustus-gene-143.4-mRNA-1  | Japonica | Japonica |               | Os05g0307200 | OsR498G0510419200.01.T04 | Pentatricopeptide repeat-containing protein isoform A                         |
| maker-5-augustus-gene-145.39-mRNA-1 | Japonica | NA       |               | Os05g0310500 | OsR498G0510436100.01.T03 | Cathepsin B heavy chain like                                                  |
| maker-5-augustus-gene-147.0-mRNA-1  | Japonica | NA       |               |              | OsR498G0510444600.01.T03 | Mediator of RNA polymerase II transcription subunit 33A                       |
| maker-5-augustus-gene-148.0-mRNA-1  | Japonica | Indica   |               | Os05g0313500 | OsR498G0510452500.01.T01 | Quinone oxidoreductase-like protein 2-like                                    |
| maker-5-augustus-gene-148.10-mRNA-1 | Japonica | NA       |               | Os05g0313900 |                          | UBA domain-containing protein                                                 |
| maker-5-augustus-gene-148.6-mRNA-1  | Japonica | Japonica |               | Os05g0313600 | OsR498G0510452900.01.T01 | Pentatricopeptide repeat superfamily protein isoform 2                        |
| maker-5-augustus-gene-148.8-mRNA-1  | Japonica | NA       |               | Os05g0312500 | OsR498G0510448200.01.T03 | Reticulon domain-containing protein                                           |
| maker-5-augustus-gene-149.25-mRNA-1 | Japonica | NA       |               | Os05g0315200 | OsR498G0510464300.01.T01 | Developmental and secondary metabolism regulator veA like                     |
| maker-5-augustus-gene-149.32-mRNA-1 | Japonica | NA       |               | Os05g0314100 | OsR498G0510456400.01.T02 | Small nuclear ribonucleoprotein Sm D2                                         |
| maker-5-augustus-gene-149.36-mRNA-1 | Japonica | NA       |               | Os05g0315100 |                          | Embryo specific2                                                              |
| maker-5-augustus-gene-149.41-mRNA-1 | Japonica | Indica   |               | Os05g0315501 | OsR498G0510465200.01.T01 |                                                                               |
| maker-5-augustus-gene-15.39-mRNA-1  | Japonica | NA       |               | Os05g0126100 | OsR498G0509650100.01.T01 | Tetraspanin/Peripherin                                                        |
| maker-5-augustus-gene-15.43-mRNA-1  | Japonica | NA       |               | Os05g0127200 | OsR498G0509653300.01.T01 | Phosphoinositide phospholipase C                                              |
| maker-5-augustus-gene-15.52-mRNA-1  | Japonica | Indica   |               | Os05g0562300 | OsR498G0509655300.01.T01 | DnaJ subfamily B member like                                                  |
| maker-5-augustus-gene-15.54-mRNA-1  | Japonica | NA       |               | Os05g0126200 | OsR498G0509650600.01.T01 | Serine/threonine-protein kinase D2 (Fragment)                                 |
| maker-5-augustus-gene-15.56-mRNA-1  | Japonica | NA       |               |              | OsR498G0509650800.01.T02 | Putative MYB DNA-binding domain superfamily protein                           |
| maker-5-augustus-gene-15.59-mRNA-1  | Japonica | NA       |               | Os05g0126800 | OsR498G0509652000.01.T01 |                                                                               |
| maker-5-augustus-gene-15.61-mRNA-1  | Japonica | NA       |               | Os05g0127500 | OsR498G0509655800.01.T01 | probable 2-oxoglutarate-dependent dioxygenase At3g111800                      |
| maker-5-augustus-gene-150.0-mRNA-1  | Japonica | NA       |               |              | OsR498G0815909000.01.T01 | Transposon protein, putative, CACTA, En/Spm sub-class                         |
| maker-5-augustus-gene-150.15-mRNA-1 | Japonica | NA       |               | Os05g0316100 | OsR498G0510468000.01.T02 | Metal ion transporter, putative                                               |
| maker-5-augustus-gene-150.3-mRNA-1  | Japonica | NA       |               |              |                          | Chaperone protein dnaJ-related                                                |
| maker-5-augustus-gene-150.7-mRNA-1  | Japonica | NA       |               |              |                          |                                                                               |
| maker-5-augustus-gene-150.9-mRNA-1  | Japonica | NA       |               | Os05g0316000 | OsR498G0510467600.01.T01 | RING finger and transmembrane domain-containing protein 2                     |
| maker-5-augustus-gene-152.30-mRNA-1 | Japonica | Indica   | CC-Kinase-TM  | Os05g0318100 | OsR498G0510478100.01.T01 | Wall-associated receptor kinase-like protein 20                               |
| maker-5-augustus-gene-152.39-mRNA-1 | Japonica | Indica   |               | Os01g0663300 | OsR498G0510481500.01.T01 | Mannan endo-1,4-beta-mannosidase                                              |
| maker-5-augustus-gene-152.41-mRNA-1 | Japonica | NA       | Kinase-TM     | Os05g0319700 | OsR498G0510482900.01.T01 | Phytosulfokine receptor                                                       |
| maker-5-augustus-gene-152.45-mRNA-1 | Japonica | Indica   |               | Os01g0192900 | OsR498G0510482200.01.T01 | 1-aminocyclopropane-1-carboxylate synthase like                               |
| maker-5-augustus-gene-153.0-mRNA-1  | Japonica | Indica   |               | Os05g0320300 | OsR498G0510485300.01.T01 | Putative homeodomain-like transcription factor superfamily protein (Fragment) |
| maker-5-augustus-gene-153.15-mRNA-1 | Japonica | NA       |               | Os05g0320700 | OsR498G0510486800.01.T01 | Cinnamate 4-monoxygenase                                                      |
| maker-5-augustus-gene-153.2-mRNA-1  | Japonica | NA       |               | Os01g0265300 | OsR498G0100612800.01.T01 | PMD domain-containing protein (Fragment)                                      |
| maker-5-augustus-gene-153.6-mRNA-1  | Japonica | NA       |               | Os05g0320650 |                          | ATP synthase subunit b                                                        |
| maker-5-augustus-gene-16.0-mRNA-1   | Japonica | Japonica |               | Os05g0128300 | OsR498G0509661000.01.T01 | VARLMGL domain-containing protein                                             |
| maker-5-augustus-gene-167.29-mRNA-1 | Japonica | Indica   |               | Os05g0342900 | OsR498G0510566900.01.T02 | Tetratricopeptide-like helical                                                |
| maker-5-augustus-gene-168.0-mRNA-1  | Japonica | NA       |               | Os05g0343400 | OsR498G0510567700.01.T02 | WRKY53-superfamily of TFs having WRKY and zinc finger domains                 |
| maker-5-augustus-gene-169.56-mRNA-1 | Japonica | NA       |               |              |                          | Transcription initiation factor TFIID subunit like                            |
| maker-5-augustus-gene-169.59-mRNA-1 | Japonica | NA       |               | Os07g0543700 |                          | Retrotransposon protein, putative, Ty3-gypsy sub-class                        |
| maker-5-augustus-gene-17.39-mRNA-1  | Japonica | NA       |               | Os03g0666200 | OsR498G0306745400.01.T02 | Differentially expressed in FDCP 6                                            |
| maker-5-augustus-gene-17.51-mRNA-1  | Japonica | Indica   |               | Os07g0461900 | OsR498G0509663100.01.T03 | Acetylnithine aminotransferase, mitochondrial                                 |
| maker-5-augustus-gene-17.54-mRNA-1  | Japonica | Indica   |               | Os05g0129800 | OsR498G0509666100.01.T01 | WRKY transcription factor 26                                                  |
| maker-5-augustus-gene-17.57-mRNA-1  | Japonica | NA       | Kinase-TM     |              | OsR498G0509666500.01.T01 | Cysteine-rich receptor-like protein kinase 3                                  |
| maker-5-augustus-gene-17.62-mRNA-1  | Japonica | Japonica |               | Os05g0128900 | OsR498G0816083200.01.T02 | Putative alpha,alpha-trehalose-phosphate synthase                             |
| maker-5-augustus-gene-17.65-mRNA-1  | Japonica | NA       |               | Os05g0129200 |                          | Endoglucanase                                                                 |
| maker-5-augustus-gene-17.67-mRNA-1  | Japonica | NA       |               | Os05g0129700 | OsR498G0509664800.01.T01 | Homeobox protein liguleless 3                                                 |
| maker-5-augustus-gene-17.69-mRNA-1  | Japonica | NA       |               | Os05g0129900 | OsR498G0509666400.01.T02 | RNA polymerase II-associated protein 3                                        |
| maker-5-augustus-gene-170.31-mRNA-1 | Japonica | NA       |               | Os05g0346800 | OsR498G0510588200.01.T01 | LOB domain-containing protein 3                                               |
| maker-5-augustus-gene-170.33-mRNA-1 | Japonica | NA       |               | Os05g0346500 | OsR498G0510587200.01.T03 | Mannosyl-glycoprotein endo-beta-N-acetylglucosaminidase                       |
| maker-5-augustus-gene-170.42-mRNA-1 | Japonica | Indica   |               | Os05g0346200 | OsR498G0510586200.01.T01 | AP2 transcriptional activator variant 1                                       |
| maker-5-augustus-gene-170.45-mRNA-1 | Japonica | NA       |               | Os05g0345700 |                          | DUF569 domain-containing protein (Fragment)                                   |
| maker-5-augustus-gene-170.48-mRNA-1 | Japonica | NA       |               |              |                          | BTB/POZ domain-containing protein At2g30600                                   |
| maker-5-augustus-gene-170.53-mRNA-1 | Japonica | NA       |               | Os05g0345400 | OsR498G0510584800.01.T02 | N-terminal acetyltransferase B complex auxiliary subunit NAA25                |
| maker-5-augustus-gene-170.59-mRNA-1 | Japonica | NA       |               | Os05g0346400 | OsR498G0510586700.01.T01 | Mitochondrial substrate carrier family protein isoform 1                      |
| maker-5-augustus-gene-170.61-mRNA-1 | Japonica | NA       |               | Os05g0346100 | OsR498G0510585900.01.T02 | Sorting nexin 2B isoform B                                                    |
| maker-5-augustus-gene-171.0-mRNA-1  | Japonica | NA       |               | Os05g0344400 |                          |                                                                               |
| maker-5-augustus-gene-171.2-mRNA-1  | Japonica | NA       |               |              | OsR498G0510583100.01.T01 | Cellular retinaldehyde binding/alpha-tocopherol transport                     |
| maker-5-augustus-gene-172.5-mRNA-1  | Japonica | NA       |               | Os02g0513700 |                          | HAT dimerisation domain-containing protein-like                               |
| maker-5-augustus-gene-178.23-mRNA-1 | Japonica | NA       |               |              |                          | Phospholipase D                                                               |

|                                     |          |          |           |              |                          |                                                                             |
|-------------------------------------|----------|----------|-----------|--------------|--------------------------|-----------------------------------------------------------------------------|
| maker-5-augustus-gene-178.29-mRNA-1 | Japonica | NA       |           |              | OsR498G0510641800.01.T02 |                                                                             |
| maker-5-augustus-gene-179.35-mRNA-1 | Japonica | NA       |           | Os05g0361200 | OsR498G0510654700.01.T05 | Ferrochelatase                                                              |
| maker-5-augustus-gene-18.11-mRNA-1  | Japonica | NA       |           |              |                          | Gibberellin receptor GID1L2                                                 |
| maker-5-augustus-gene-18.12-mRNA-1  | Japonica | NA       |           | Os05g0131100 | OsR498G0509671200.01.T02 |                                                                             |
| maker-5-augustus-gene-18.16-mRNA-1  | Japonica | NA       |           |              | OsR498G0509671400.01.T01 | Solute carrier family 40 member 3, chloroplastic                            |
| maker-5-augustus-gene-18.2-mRNA-1   | Japonica | Japonica |           | Os05g0130400 | OsR498G0509668800.01.T01 | zf-RVT domain-containing protein                                            |
| maker-5-augustus-gene-18.22-mRNA-1  | Japonica | NA       |           | Os05g0132100 | OsR498G0509672600.01.T02 | AMP-dependent synthetase/ligase                                             |
| maker-5-augustus-gene-18.6-mRNA-1   | Japonica | NA       |           | Os05g0131000 | OsR498G0509670800.01.T01 | Beta-carotene isomerase D27 chloroplastic                                   |
| maker-5-augustus-gene-180.36-mRNA-1 | Japonica | NA       |           | Os05g0361500 | OsR498G0510656300.01.T01 | Pectinesterase                                                              |
| maker-5-augustus-gene-180.40-mRNA-1 | Japonica | NA       |           |              | OsR498G0510658900.01.T01 | formin-like protein 14                                                      |
| maker-5-augustus-gene-180.42-mRNA-1 | Japonica | NA       |           | Os05g0362100 | OsR498G0510659700.01.T05 | 3-hydroxyacyl-CoA dehydrogenase                                             |
| maker-5-augustus-gene-180.49-mRNA-1 | Japonica | NA       |           | Os05g0362500 | OsR498G0510660700.01.T01 | Eukaryotic translation initiation factor 2A                                 |
| maker-5-augustus-gene-180.50-mRNA-1 | Japonica | NA       |           | Os05g0361900 | OsR498G0510658800.01.T02 | S-adenosylmethionine carrier 1, chloroplastic/mitochondrial                 |
| maker-5-augustus-gene-180.54-mRNA-1 | Japonica | Indica   |           | Os05g0362600 | OsR498G0510661200.01.T01 | Late embryogenesis abundant                                                 |
| maker-5-augustus-gene-181.0-mRNA-1  | Japonica | NA       |           | Os05g0363100 | OsR498G0510662300.01.T03 | Caffeoylshikimate esterase                                                  |
| maker-5-augustus-gene-181.3-mRNA-1  | Japonica | NA       |           | Os05g0363200 | OsR498G0510662600.01.T01 | UDP-glucuronic acid decarboxylase                                           |
| maker-5-augustus-gene-19.0-mRNA-1   | Japonica | NA       |           | Os05g0133401 | OsR498G0509676900.01.T01 | Gdsl esterase/lipase lip-4                                                  |
| maker-5-augustus-gene-19.12-mRNA-1  | Japonica | NA       |           |              | OsR498G0509674200.01.T01 | Agnet domain-containing protein (Fragment)                                  |
| maker-5-augustus-gene-19.14-mRNA-1  | Japonica | NA       |           |              | OsR498G0509674600.01.T05 | O-fucosyltransferase family protein (Fragment)                              |
| maker-5-augustus-gene-19.18-mRNA-1  | Japonica | NA       |           |              | OsR498G0509675400.01.T01 | Transcription factor MYB108                                                 |
| maker-5-augustus-gene-19.2-mRNA-1   | Japonica | NA       |           | Os08g0448900 |                          | ATP-dependent DNA helicase                                                  |
| maker-5-augustus-gene-19.20-mRNA-1  | Japonica | NA       |           | Os05g0133100 | OsR498G0509676800.01.T03 | Putative nitrogen regulatory protein PII                                    |
| maker-5-augustus-gene-191.72-mRNA-1 | Japonica | NA       |           | Os05g0376800 | OsR498G0510716800.01.T01 | Gibberellin induced protein (Fragment)                                      |
| maker-5-augustus-gene-191.74-mRNA-1 | Japonica | NA       |           | Os05g0377000 | OsR498G0510717000.01.T01 | Acyl carrier protein 2, mitochondrial                                       |
| maker-5-augustus-gene-192.0-mRNA-1  | Japonica | NA       |           |              | OsR498G0510724400.01.T01 | CYSTM domain-containing protein                                             |
| maker-5-augustus-gene-192.2-mRNA-1  | Japonica | NA       |           | Os05g0378800 | OsR498G0510725000.01.T02 | Methyltransferase                                                           |
| maker-5-augustus-gene-193.0-mRNA-1  | Japonica | NA       | NBS-TM    | Os05g0379500 | OsR498G0510726700.01.T05 | Powdery mildew resistance protein PM3 variant                               |
| maker-5-augustus-gene-193.3-mRNA-1  | Japonica | NA       | NBS-TM    | Os05g0380300 | OsR498G0510726700.01.T05 | Powdery mildew resistance protein PM3 variant                               |
| maker-5-augustus-gene-194.10-mRNA-1 | Japonica | Indica   |           | Os05g0382200 | OsR498G0510738600.01.T01 | Cation/H+ antiporter 20                                                     |
| maker-5-augustus-gene-194.13-mRNA-1 | Japonica | NA       |           |              | OsR498G0510740200.01.T01 |                                                                             |
| maker-5-augustus-gene-194.14-mRNA-1 | Japonica | NA       |           |              | OsR498G0510740200.01.T01 | Annexin-like protein RJ4                                                    |
| maker-5-augustus-gene-194.17-mRNA-1 | Japonica | NA       |           | Os05g0383000 | OsR498G0510740600.01.T01 | Mitochondrial fission 1 protein (Fragment)                                  |
| maker-5-augustus-gene-194.20-mRNA-1 | Japonica | NA       |           | Os05g0383100 | OsR498G0510740800.01.T01 | MHD domain-containing protein                                               |
| maker-5-augustus-gene-194.7-mRNA-1  | Japonica | NA       |           | Os05g0382900 | OsR498G0510740300.01.T01 | Annexin                                                                     |
| maker-5-augustus-gene-195.41-mRNA-1 | Japonica | NA       |           | Os05g0384800 | OsR498G0510747400.01.T02 | Regulator of chromosome condensation (RCC1) family with FYVE zinc finger    |
| maker-5-augustus-gene-196.5-mRNA-1  | Japonica | NA       |           | Os05g0386201 | OsR498G0510753400.01.T01 | Lateral root primordium protein-related isoform 1                           |
| maker-5-augustus-gene-196.7-mRNA-1  | Japonica | NA       |           | Os05g0386800 | OsR498G0510755200.01.T03 | COBRA-like protein 3                                                        |
| maker-5-augustus-gene-197.43-mRNA-1 | Japonica | NA       |           | Os05g0386900 | OsR498G0510755300.01.T03 | Glycosyltransferase                                                         |
| maker-5-augustus-gene-197.46-mRNA-1 | Japonica | NA       |           |              |                          | Glycosyltransferase                                                         |
| maker-5-augustus-gene-197.48-mRNA-1 | Japonica | NA       |           | Os05g0387200 | OsR498G0510755500.01.T01 | UDP-sulfoquinovose synthase chloroplastic                                   |
| maker-5-augustus-gene-197.50-mRNA-1 | Japonica | Indica   |           | Os01g0957000 | OsR498G0510758700.01.T01 | NAD kinase 1                                                                |
| maker-5-augustus-gene-197.55-mRNA-1 | Japonica | NA       |           | Os05g0388500 | OsR498G0510759100.01.T01 | Ribosomal protein (Fragment)                                                |
| maker-5-augustus-gene-197.58-mRNA-1 | Japonica | NA       |           | Os05g0388600 | OsR498G0510759300.01.T01 | Protein RETICULATA-RELATED 4, chloroplastic isoform A                       |
| maker-5-augustus-gene-197.62-mRNA-1 | Japonica | Indica   |           | Os05g0389000 | OsR498G0510759900.01.T01 | Dwarf & irregular leaf1                                                     |
| maker-5-augustus-gene-197.66-mRNA-1 | Japonica | Indica   |           | Os05g0387800 | OsR498G0510758000.01.T05 | N-alpha-acetyltransferase 40                                                |
| maker-5-augustus-gene-197.72-mRNA-1 | Japonica | NA       |           | Os05g0387900 | OsR498G0510758400.01.T03 | Protein N-terminal glutamine amidohydrolase                                 |
| maker-5-augustus-gene-198.0-mRNA-1  | Japonica | NA       |           | Os05g0389400 | OsR498G0510761300.01.T01 | Folate-biopterin transporter like                                           |
| maker-5-augustus-gene-198.11-mRNA-1 | Japonica | NA       |           | Os05g0390100 | OsR498G0510763700.01.T05 | Transmembrane GTPase FZO-like                                               |
| maker-5-augustus-gene-198.18-mRNA-1 | Japonica | NA       |           |              |                          | RNA polymerase II C-terminal domain phosphatase-like                        |
| maker-5-augustus-gene-198.2-mRNA-1  | Japonica | NA       |           | Os05g0389600 | OsR498G0510762500.01.T04 | Putative RING zinc finger domain superfamily protein                        |
| maker-5-augustus-gene-198.25-mRNA-1 | Japonica | NA       |           |              |                          | U6 snRNA-associated Sm-like protein LSM5                                    |
| maker-5-augustus-gene-198.29-mRNA-1 | Japonica | NA       |           | Os05g0389500 |                          | Carbon catabolite repressor protein 4 4                                     |
| maker-5-augustus-gene-198.34-mRNA-1 | Japonica | Indica   |           | Os05g0390000 | OsR498G0510763400.01.T01 | Fungal lipase-like domain containing protein                                |
| maker-5-augustus-gene-198.7-mRNA-1  | Japonica | NA       | Kinase-TM | Os05g0389700 | OsR498G0510762700.01.T02 | Cyclin-dependent kinase                                                     |
| maker-5-augustus-gene-199.18-mRNA-1 | Japonica | NA       |           | Os05g0391500 | OsR498G0510770300.01.T01 | Mannosylglycoprotein endo-beta-mannosidase                                  |
| maker-5-augustus-gene-199.24-mRNA-1 | Japonica | Indica   |           | Os05g0391200 | OsR498G0510770000.01.T01 | probable glycosyltransferase STELLO2                                        |
| maker-5-augustus-gene-199.26-mRNA-1 | Japonica | NA       |           | Os05g0391600 | OsR498G0510770800.01.T01 | EGF domain-specific O-linked N-acetylglucosamine transferase-like isoform 1 |
| maker-5-augustus-gene-2.35-mRNA-1   | Japonica | Japonica |           | Os05g0103100 | OsR498G0509564200.01.T02 | Translocon-associated protein subunit beta like                             |
| maker-5-augustus-gene-2.7-mRNA-1    | Japonica | NA       |           | Os05g0103200 | OsR498G0509564300.01.T01 | Peptidyl-prolyl cis-trans isomerase                                         |
| maker-5-augustus-gene-20.0-mRNA-1   | Japonica | NA       |           | Os05g0134200 | OsR498G0509680700.01.T01 | Protein-serine/threonine phosphatase                                        |
| maker-5-augustus-gene-20.11-mRNA-1  | Japonica | NA       |           | Os05g0135000 | OsR498G0509684300.01.T01 | Peroxidase                                                                  |

|                                     |          |          |           |              |                          |                                                                            |
|-------------------------------------|----------|----------|-----------|--------------|--------------------------|----------------------------------------------------------------------------|
| maker-5-augustus-gene-20.13-mRNA-1  | Japonica | NA       |           | Os05g0135200 | OsR498G0509685100.01.T01 | Peroxidase                                                                 |
| maker-5-augustus-gene-20.20-mRNA-1  | Japonica | NA       | Kinase-TM | Os05g0134000 | OsR498G0509679200.01.T01 | Non-specific serine/threonine protein kinase                               |
| maker-5-augustus-gene-20.24-mRNA-1  | Japonica | NA       |           |              | OsR498G0509681000.01.T02 | Protein-serine/threonine phosphatase                                       |
| maker-5-augustus-gene-20.7-mRNA-1   | Japonica | NA       |           | Os05g0134700 | OsR498G0509682900.01.T01 | Peroxidase                                                                 |
| maker-5-augustus-gene-200.0-mRNA-1  | Japonica | NA       |           |              | OsR498G0510772700.01.T03 | Decapping nuclease DXO, chloroplastic                                      |
| maker-5-augustus-gene-200.12-mRNA-1 | Japonica | NA       | Kinase-TM | Os05g0392300 | OsR498G0510773500.01.T01 | Cdk activating kinase (CAK)/RNA polymerase II transcription initiation     |
| maker-5-augustus-gene-200.18-mRNA-1 | Japonica | NA       | LRR-TM    | Os05g0393100 | OsR498G0510775500.01.T01 | Serine-threonine protein kinase, plant-type, putative isoform 2            |
| maker-5-augustus-gene-200.22-mRNA-1 | Japonica | NA       | Kinase-TM |              | OsR498G0510772400.01.T05 | RING-type E3 ubiquitin transferase                                         |
| maker-5-augustus-gene-200.29-mRNA-1 | Japonica | NA       |           | Os05g0392700 | OsR498G0510775200.01.T01 | Peroxisomal adenine nucleotide carrier 1 like                              |
| maker-5-augustus-gene-200.6-mRNA-1  | Japonica | Indica   |           | Os05g0392200 | OsR498G0510773300.01.T01 | EEF1A lysine methyltransferase 4 isoform X3                                |
| maker-5-augustus-gene-201.41-mRNA-1 | Japonica | NA       |           | Os05g0393400 | OsR498G0510776500.01.T02 | Protein PALE CRESS, chloroplastic                                          |
| maker-5-augustus-gene-201.46-mRNA-1 | Japonica | NA       |           | Os05g0393800 | OsR498G0510777900.01.T01 | ERD (Early-responsive to dehydration stress) family protein                |
| maker-5-augustus-gene-201.49-mRNA-1 | Japonica | NA       |           |              | OsR498G0510779700.01.T02 | DUF632 domain-containing protein                                           |
| maker-5-augustus-gene-201.52-mRNA-1 | Japonica | NA       |           | Os05g0394100 | OsR498G0713729200.01.T01 | NAM-associated domain-containing protein                                   |
| maker-5-augustus-gene-201.54-mRNA-1 | Japonica | NA       |           | Os05g0394900 | OsR498G0510782000.01.T02 | Nucleolin                                                                  |
| maker-5-augustus-gene-202.30-mRNA-1 | Japonica | NA       |           | Os05g0395300 | OsR498G0510783100.01.T01 | Putative gliding motility-associated protein GlcE                          |
| maker-5-augustus-gene-202.37-mRNA-1 | Japonica | NA       |           |              | OsR498G0510784800.01.T01 | Two-component response regulator ORR25                                     |
| maker-5-augustus-gene-203.0-mRNA-1  | Japonica | NA       |           |              | OsR498G0510790300.01.T02 | J domain-containing protein (Fragment)                                     |
| maker-5-augustus-gene-203.10-mRNA-1 | Japonica | Japonica |           | Os05g0399100 | OsR498G0510792900.01.T01 | DLH domain-containing protein (Fragment)                                   |
| maker-5-augustus-gene-203.14-mRNA-1 | Japonica | NA       |           | Os05g0399200 | OsR498G0510793100.01.T01 | DLH domain-containing protein (Fragment)                                   |
| maker-5-augustus-gene-203.18-mRNA-1 | Japonica | NA       |           | Os05g0397300 | OsR498G0510788800.01.T02 |                                                                            |
| maker-5-augustus-gene-203.20-mRNA-1 | Japonica | NA       |           | Os05g0397650 | OsR498G0510790000.01.T03 | probable E3 ubiquitin-protein ligase LOG2                                  |
| maker-5-augustus-gene-203.23-mRNA-1 | Japonica | NA       |           | Os05g0397700 | OsR498G0510790200.01.T02 | Preprotein translocase subunit SCY2 chloroplastic                          |
| maker-5-augustus-gene-203.27-mRNA-1 | Japonica | NA       |           |              | OsR498G0510790800.01.T03 | Cyclin                                                                     |
| maker-5-augustus-gene-203.3-mRNA-1  | Japonica | NA       |           | Os05g0397900 | OsR498G0510790500.01.T01 | Kinesin-4                                                                  |
| maker-5-augustus-gene-203.30-mRNA-1 | Japonica | NA       |           | Os05g0398100 | OsR498G0510791000.01.T01 | ARM REPEAT PROTEIN INTERACTING WITH like                                   |
| maker-5-augustus-gene-203.8-mRNA-1  | Japonica | NA       | Kinase-TM | Os05g0398800 | OsR498G0510792100.01.T01 | Putative serine/threonine-protein kinase RLCKVII (Fragment)                |
| maker-5-augustus-gene-204.0-mRNA-1  | Japonica | NA       |           | Os05g0399400 | OsR498G0510793500.01.T01 | Acidic chitinase                                                           |
| maker-5-augustus-gene-204.11-mRNA-1 | Japonica | NA       |           | Os05g0400600 | OsR498G0510795100.01.T04 | Putative ABC/ECF transporter, transmembrane component                      |
| maker-5-augustus-gene-204.16-mRNA-1 | Japonica | NA       |           |              | OsR498G0510795500.01.T07 | 1-(5-phosphoribosyl)-5-[(5-phosphoribosylamino)methylideneamino] imidazole |
| maker-5-augustus-gene-204.2-mRNA-1  | Japonica | NA       |           | Os05g0399700 | OsR498G0510793900.01.T01 | Putative basic endochitinase-like                                          |
| maker-5-augustus-gene-204.28-mRNA-1 | Japonica | NA       |           | Os05g0400700 | OsR498G0510795400.01.T01 | DNA-directed RNA polymerase II non-catalytic subunit                       |
| maker-5-augustus-gene-204.4-mRNA-1  | Japonica | Japonica |           | Os05g0400100 | OsR498G0510794300.01.T01 | DLH domain-containing protein                                              |
| maker-5-augustus-gene-204.6-mRNA-1  | Japonica | Indica   |           | Os05g0400100 | OsR498G0510794500.01.T01 | DLH domain-containing protein                                              |
| maker-5-augustus-gene-204.8-mRNA-1  | Japonica | Indica   |           | Os01g0247900 | OsR498G0510794900.01.T01 | membrane protein PM19L                                                     |
| maker-5-augustus-gene-205.4-mRNA-1  | Japonica | NA       |           | Os05g0402300 | OsR498G0510801400.01.T01 | Transmembrane BAX inhibitor motif-containing protein 4                     |
| maker-5-augustus-gene-205.6-mRNA-1  | Japonica | NA       |           |              | OsR498G0510802000.01.T02 | Cation-transporting ATPase                                                 |
| maker-5-augustus-gene-205.7-mRNA-1  | Japonica | NA       |           |              | OsR498G0510802000.01.T06 | Cation-transporting ATPase                                                 |
| maker-5-augustus-gene-206.34-mRNA-1 | Japonica | NA       |           | Os05g0404200 | OsR498G0510804500.01.T01 | Peptide-methionine (R)-S-oxide reductase                                   |
| maker-5-augustus-gene-206.36-mRNA-1 | Japonica | NA       |           | Os05g0404400 | OsR498G0510805200.01.T01 | Resistance to phytophthora 1                                               |
| maker-5-augustus-gene-208.1-mRNA-1  | Japonica | NA       |           | Os05g0405900 | OsR498G0510809900.01.T01 | Autophagy-related protein 18g                                              |
| maker-5-augustus-gene-208.12-mRNA-1 | Japonica | NA       |           | Os05g0405000 | OsR498G0510806800.01.T01 | Pyruvate, phosphate dikinase                                               |
| maker-5-augustus-gene-208.13-mRNA-1 | Japonica | NA       |           | Os05g0405000 | OsR498G0510806800.01.T05 | Pyruvate, phosphate dikinase                                               |
| maker-5-augustus-gene-208.24-mRNA-1 | Japonica | NA       |           |              | OsR498G0510807800.01.T01 | Secologanin synthase                                                       |
| maker-5-augustus-gene-208.26-mRNA-1 | Japonica | NA       |           |              | OsR498G0510809200.01.T01 | Secologanin synthase                                                       |
| maker-5-augustus-gene-208.6-mRNA-1  | Japonica | Indica   |           | Os05g0406000 | OsR498G0510810100.01.T01 | Receptor-like cytosolic serine/threonine-protein kinase RBK2               |
| maker-5-augustus-gene-209.0-mRNA-1  | Japonica | NA       |           | Os05g0407500 | OsR498G0510815700.01.T01 | Gibberellin hormone receptor                                               |
| maker-5-augustus-gene-209.14-mRNA-1 | Japonica | NA       |           | Os05g0407200 | OsR498G0510814000.01.T02 | Transducin family protein / WD-40 repeat family protein                    |
| maker-5-augustus-gene-209.2-mRNA-1  | Japonica | NA       |           | Os05g0406100 | OsR498G0510810400.01.T03 | Putative inosine-uridine preferring nucleoside hydrolase                   |
| maker-5-augustus-gene-209.8-mRNA-1  | Japonica | NA       |           | Os05g0406200 | OsR498G0510811600.01.T01 | Inosine/uridine-preferring nucleoside hydrolase                            |
| maker-5-augustus-gene-21.30-mRNA-1  | Japonica | NA       | Kinase-TM | Os05g0135800 | OsR498G0509688700.01.T01 | Pto-interacting protein 1                                                  |
| maker-5-augustus-gene-21.33-mRNA-1  | Japonica | Japonica |           | Os05g0136100 | OsR498G0509690700.01.T01 |                                                                            |
| maker-5-augustus-gene-21.35-mRNA-1  | Japonica | NA       |           | Os05g0136900 | OsR498G0509694300.01.T01 | Acyl transferase 4                                                         |
| maker-5-augustus-gene-21.37-mRNA-1  | Japonica | NA       |           |              | OsR498G0509696100.01.T03 | ABC transporter B family member 4                                          |
| maker-5-augustus-gene-21.48-mRNA-1  | Japonica | NA       |           | Os05g0135900 | OsR498G0509689200.01.T02 | Nuclear envelope-associated protein 2                                      |
| maker-5-augustus-gene-21.51-mRNA-1  | Japonica | NA       | Kinase-TM | Os05g0136200 | OsR498G0509691000.01.T02 | Non-specific serine/threonine protein kinase                               |
| maker-5-augustus-gene-21.55-mRNA-1  | Japonica | NA       |           |              | OsR498G0509696800.01.T01 | WRKY transcription factor 5                                                |
| maker-5-augustus-gene-210.31-mRNA-1 | Japonica | NA       |           | Os05g0408200 | OsR498G0510818900.01.T01 | Squamosa promoter binding protein NtabSPL7                                 |
| maker-5-augustus-gene-210.35-mRNA-1 | Japonica | NA       |           | Os05g0408300 | OsR498G0510819200.01.T01 | Lipase                                                                     |
| maker-5-augustus-gene-210.39-mRNA-1 | Japonica | NA       |           | Os05g0408900 | OsR498G0510821200.01.T01 | 1-deoxy-D-xylulose-5-phosphate synthase                                    |
| maker-5-augustus-gene-211.0-mRNA-1  | Japonica | NA       |           | Os05g0409300 | OsR498G0510822700.01.T04 | Cysteine proteinase inhibitor                                              |

|                                     |          |          |        |              |                          |                                                                               |
|-------------------------------------|----------|----------|--------|--------------|--------------------------|-------------------------------------------------------------------------------|
| maker-5-augustus-gene-211.12-mRNA-1 | Japonica | NA       |        | Os05g0410500 | OsR498G0510826800.01.T01 | Putative proton-dependent oligopeptide transporter (POT)                      |
| maker-5-augustus-gene-211.4-mRNA-1  | Japonica | NA       |        | Os05g0409400 | OsR498G0510822900.01.T03 | 65-kDa microtubule-associated protein 5                                       |
| maker-5-augustus-gene-211.9-mRNA-1  | Japonica | NA       |        | Os05g0409500 | OsR498G0510823200.01.T01 | Auxin-induced protein 5NG4 (Fragment)                                         |
| maker-5-augustus-gene-212.39-mRNA-1 | Japonica | NA       |        | Os05g0410900 | OsR498G0510828200.01.T01 | Putative proton-dependent oligopeptide transporter (POT)                      |
| maker-5-augustus-gene-215.30-mRNA-1 | Japonica | NA       |        | Os05g0417100 | OsR498G0510849900.01.T01 | Serine protease                                                               |
| maker-5-augustus-gene-215.35-mRNA-1 | Japonica | NA       |        | Os05g0417200 | OsR498G0510850100.01.T01 | Thioredoxin-like fold domain-containing protein MRL7L, chloroplastic          |
| maker-5-augustus-gene-216.56-mRNA-1 | Japonica | NA       |        | Os05g0419500 | OsR498G0510859800.01.T02 | RNA-binding KH domain-containing protein isoform 1                            |
| maker-5-augustus-gene-217.0-mRNA-1  | Japonica | NA       |        | Os05g0419800 | OsR498G0510860900.01.T02 | Zinc finger protein, putative isoform 1                                       |
| maker-5-augustus-gene-217.10-mRNA-1 | Japonica | NA       |        | Os05g0420600 | OsR498G0510863900.01.T01 | Mitochondrial cytochrome c                                                    |
| maker-5-augustus-gene-217.14-mRNA-1 | Japonica | NA       |        |              | OsR498G0510865100.01.T01 | Zinc ion binding                                                              |
| maker-5-augustus-gene-217.23-mRNA-1 | Japonica | NA       |        | Os05g0421300 | OsR498G0510866100.01.T02 | Tetratricopeptide repeat protein 1                                            |
| maker-5-augustus-gene-217.25-mRNA-1 | Japonica | Indica   |        | Os05g0421600 | OsR498G0510866900.01.T01 | NAC transcription factor                                                      |
| maker-5-augustus-gene-217.3-mRNA-1  | Japonica | Japonica |        | Os05g0420200 | OsR498G0510861700.01.T01 | Electron transporter                                                          |
| maker-5-augustus-gene-217.5-mRNA-1  | Japonica | NA       |        | Os05g0420500 | OsR498G0510863700.01.T01 | TPX2 (Targeting protein for Xklp2) protein family                             |
| maker-5-augustus-gene-218.34-mRNA-1 | Japonica | NA       |        | Os05g0423200 | OsR498G0510872100.01.T02 |                                                                               |
| maker-5-augustus-gene-218.37-mRNA-1 | Japonica | NA       |        | Os05g0423400 | OsR498G0510872700.01.T06 | MADS-box transcription factor 4                                               |
| maker-5-augustus-gene-218.43-mRNA-1 | Japonica | NA       |        | Os05g0424000 | OsR498G0510874300.01.T02 | Amino acid permease                                                           |
| maker-5-augustus-gene-218.45-mRNA-1 | Japonica | NA       |        | Os05g0421900 |                          | Glutamate decarboxylase                                                       |
| maker-5-augustus-gene-218.46-mRNA-1 | Japonica | Indica   |        | Os01g0883800 | OsR498G0510868000.01.T01 | Gibberellin 20 oxidase 2                                                      |
| maker-5-augustus-gene-218.53-mRNA-1 | Japonica | NA       |        |              | OsR498G1119638400.01.T01 |                                                                               |
| maker-5-augustus-gene-218.55-mRNA-1 | Japonica | NA       |        |              | OsR498G0510870800.01.T03 | Myosin heavy chain kinase B                                                   |
| maker-5-augustus-gene-218.59-mRNA-1 | Japonica | Japonica |        | Os05g0422600 | OsR498G0510871200.01.T01 | HUN domain-containing protein                                                 |
| maker-5-augustus-gene-219.0-mRNA-1  | Japonica | NA       |        |              |                          | F-box and leucine-rich repeat protein 1                                       |
| maker-5-augustus-gene-219.12-mRNA-1 | Japonica | NA       |        | Os05g0424900 |                          | DUF632 domain-containing protein                                              |
| maker-5-augustus-gene-219.3-mRNA-1  | Japonica | NA       |        | Os05g0426000 | OsR498G0510879700.01.T01 | Bidirectional sugar transporter SWEET                                         |
| maker-5-augustus-gene-219.6-mRNA-1  | Japonica | NA       |        | Os05g0424800 | OsR498G0510876200.01.T02 | Probable magnesium transporter                                                |
| maker-5-augustus-gene-22.4-mRNA-1   | Japonica | Indica   |        | Os05g0139100 | OsR498G0509702300.01.T01 | Phytochrome interacting factor 3                                              |
| maker-5-augustus-gene-22.8-mRNA-1   | Japonica | Indica   |        | Os05g0137700 | OsR498G0509698000.01.T01 | 4HBT domain-containing protein (Fragment)                                     |
| maker-5-augustus-gene-220.0-mRNA-1  | Japonica | NA       |        | Os05g0426100 | OsR498G0510880100.01.T01 | ENTH domain-containing protein (Fragment)                                     |
| maker-5-augustus-gene-220.11-mRNA-1 | Japonica | Indica   |        | Os05g0426400 | OsR498G0510881400.01.T01 | Hexosyltransferase                                                            |
| maker-5-augustus-gene-220.14-mRNA-1 | Japonica | NA       |        | Os05g0427200 | OsR498G0510885600.01.T02 | Hexosyltransferase                                                            |
| maker-5-augustus-gene-220.18-mRNA-1 | Japonica | NA       |        | Os05g0427300 | OsR498G0510885600.01.T06 | Splicing factor 3B subunit like                                               |
| maker-5-augustus-gene-220.3-mRNA-1  | Japonica | NA       |        | Os05g0426300 | OsR498G0510881100.01.T01 | Protein trichome birefringence-like 7                                         |
| maker-5-augustus-gene-220.6-mRNA-1  | Japonica | NA       |        | Os05g0426800 | OsR498G0510884300.01.T01 | CTTNBP 2 amino-terminal-like protein                                          |
| maker-5-augustus-gene-220.8-mRNA-1  | Japonica | NA       |        | Os05g0426200 | OsR498G0510880400.01.T04 | NAC transcription factor                                                      |
| maker-5-augustus-gene-221.38-mRNA-1 | Japonica | Japonica |        | Os05g0429100 | OsR498G0408675500.01.T01 | Retrotransposon protein, putative, Ty3-gypsy sub-class                        |
| maker-5-augustus-gene-221.39-mRNA-1 | Japonica | Indica   |        | Os01g0875700 | OsR498G0510888800.01.T01 | HSP40/DnaJ peptide-binding protein                                            |
| maker-5-augustus-gene-221.41-mRNA-1 | Japonica | NA       |        | Os05g0428100 | OsR498G0510889400.01.T01 | SUEL-type lectin domain-containing protein                                    |
| maker-5-augustus-gene-221.48-mRNA-1 | Japonica | NA       |        | Os05g0428400 | OsR498G0510890400.01.T01 | Usp domain-containing protein (Fragment)                                      |
| maker-5-augustus-gene-221.51-mRNA-1 | Japonica | Indica   |        | Os05g0428700 | OsR498G0510891800.01.T01 | Inwardly rectifying potassium channel AKT2                                    |
| maker-5-augustus-gene-221.56-mRNA-1 | Japonica | NA       |        | Os05g0429000 | OsR498G0510892600.01.T01 | Glycine hydroxymethyltransferase                                              |
| maker-5-augustus-gene-221.60-mRNA-1 | Japonica | NA       |        | Os05g0429400 | OsR498G0510893800.01.T01 | SEC14 cytosolic factor family protein / phosphoglyceride transfer family prot |
| maker-5-augustus-gene-222.49-mRNA-1 | Japonica | NA       |        |              | OsR498G0510894800.01.T01 | Carboxymethylenebutenolidase                                                  |
| maker-5-augustus-gene-226.75-mRNA-1 | Japonica | NA       |        | Os05g0440050 | OsR498G0510927800.01.T01 | LRAT domain-containing protein (Fragment)                                     |
| maker-5-augustus-gene-226.77-mRNA-1 | Japonica | NA       |        | Os05g0440100 | OsR498G0510928200.01.T03 | Histone deacetylase                                                           |
| maker-5-augustus-gene-227.41-mRNA-1 | Japonica | NA       | Kinase | Os05g0440800 | OsR498G0510929300.01.T06 | Serine/threonine-protein kinase Nek5                                          |
| maker-5-augustus-gene-227.48-mRNA-1 | Japonica | NA       |        | Os05g0440300 | OsR498G0510928400.01.T02 | Histone deacetylase                                                           |
| maker-5-augustus-gene-227.51-mRNA-1 | Japonica | Indica   |        | Os05g0442400 | OsR498G0510935200.01.T01 | Transcription factor DIVARICATA                                               |
| maker-5-augustus-gene-227.53-mRNA-1 | Japonica | NA       |        | Os05g0442400 | OsR498G0510935600.01.T01 | Transcription factor DIVARICATA                                               |
| maker-5-augustus-gene-228.0-mRNA-1  | Japonica | Indica   |        | Os05g0443900 | OsR498G0510938100.01.T08 | Putative bZIP transcription factor superfamily protein                        |
| maker-5-augustus-gene-228.16-mRNA-1 | Japonica | Indica   |        | Os05g0444300 | OsR498G0510941100.01.T01 | Solute carrier                                                                |
| maker-5-augustus-gene-228.19-mRNA-1 | Japonica | NA       |        | Os05g0443300 | OsR498G0510937000.01.T01 | Protein transport protein like                                                |
| maker-5-augustus-gene-228.26-mRNA-1 | Japonica | Indica   |        | Os05g0443400 | OsR498G0510937400.01.T04 | Glucan endo-13-beta-glucosidase 14                                            |
| maker-5-augustus-gene-228.29-mRNA-1 | Japonica | NA       |        | Os05g0443700 |                          | Syntaxin/t-SNARE family protein                                               |
| maker-5-augustus-gene-228.31-mRNA-1 | Japonica | NA       |        | Os05g0443800 | OsR498G0510938000.01.T04 | Tubulin GTPase                                                                |
| maker-5-augustus-gene-228.7-mRNA-1  | Japonica | NA       |        | Os05g0444200 |                          | Zinc finger protein WIP5                                                      |
| maker-5-augustus-gene-228.9-mRNA-1  | Japonica | NA       |        | Os05g0444300 | OsR498G0510940500.01.T01 | Solute carrier family 35 member F1                                            |
| maker-5-augustus-gene-229.0-mRNA-1  | Japonica | NA       |        | Os05g0445500 | OsR498G0510944900.01.T01 | Acidic ribosomal protein P2a-2                                                |
| maker-5-augustus-gene-229.3-mRNA-1  | Japonica | NA       |        | Os05g0445800 | OsR498G0510945100.01.T01 |                                                                               |
| maker-5-augustus-gene-229.5-mRNA-1  | Japonica | NA       |        |              |                          | Transcriptional activator DEMETER                                             |
| maker-5-augustus-gene-229.6-mRNA-1  | Japonica | NA       |        |              | OsR498G0510947600.01.T06 | ENDO3c domain-containing protein                                              |

|                                     |          |          |        |              |                          |                                                                  |
|-------------------------------------|----------|----------|--------|--------------|--------------------------|------------------------------------------------------------------|
| maker-5-augustus-gene-23.38-mRNA-1  | Japonica | Indica   |        | Os05g0140600 | OsR498G0509710600.01.T01 | Agenet domain-containing protein                                 |
| maker-5-augustus-gene-23.41-mRNA-1  | Japonica | NA       |        | Os05g0140800 | OsR498G0509711200.01.T01 | Glucose and ribitol dehydrogenase                                |
| maker-5-augustus-gene-23.43-mRNA-1  | Japonica | NA       |        | Os05g0141000 | OsR498G0509711600.01.T01 |                                                                  |
| maker-5-augustus-gene-23.46-mRNA-1  | Japonica | Japonica |        | Os05g0141200 | OsR498G0509712000.01.T01 |                                                                  |
| maker-5-augustus-gene-23.49-mRNA-1  | Japonica | NA       |        | Os05g0141400 | OsR498G0509712800.01.T01 | Putative tRNA/rRNA methyltransferase YsgA (Fragment)             |
| maker-5-augustus-gene-230.0-mRNA-1  | Japonica | NA       |        | Os04g0354200 |                          | MULE domain-containing protein (Fragment)                        |
| maker-5-augustus-gene-230.13-mRNA-1 | Japonica | NA       |        | Os05g0446900 | OsR498G0510949400.01.T01 | CBM20 domain-containing protein (Fragment)                       |
| maker-5-augustus-gene-230.19-mRNA-1 | Japonica | NA       |        |              | OsR498G0510950800.01.T01 | Mediator of RNA polymerase II transcription subunit 13           |
| maker-5-augustus-gene-230.2-mRNA-1  | Japonica | NA       |        | Os05g0446800 | OsR498G0510948800.01.T01 | Arginyl-tRNA--protein transferase                                |
| maker-5-augustus-gene-230.24-mRNA-1 | Japonica | NA       |        | Os05g0447700 | OsR498G0510951600.01.T02 | Tetratricopeptide repeat-like superfamily protein                |
| maker-5-augustus-gene-230.27-mRNA-1 | Japonica | NA       |        | Os11g0307600 | OsR498G1119899800.01.T01 | Protein kinase domain-containing protein                         |
| maker-5-augustus-gene-231.0-mRNA-1  | Japonica | Indica   |        | Os01g0855000 | OsR498G0510952700.01.T01 | Glycerol-3-phosphate 2-O-acyltransferase 6                       |
| maker-5-augustus-gene-231.2-mRNA-1  | Japonica | NA       |        | Os05g0449500 | OsR498G0510956300.01.T01 | Coronatine-insensitive protein homolog 1b                        |
| maker-5-augustus-gene-231.4-mRNA-1  | Japonica | Indica   |        | Os05g0449600 | OsR498G0510956700.01.T01 | Beta-glucosidase                                                 |
| maker-5-augustus-gene-231.8-mRNA-1  | Japonica | NA       |        | Os05g0449900 | OsR498G0510957400.01.T01 | Transcription factor DIVARICATA                                  |
| maker-5-augustus-gene-232.34-mRNA-1 | Japonica | NA       |        |              |                          |                                                                  |
| maker-5-augustus-gene-232.36-mRNA-1 | Japonica | NA       |        | Os05g0451100 | OsR498G0510961900.01.T01 | Anion transporter 3 like                                         |
| maker-5-augustus-gene-232.41-mRNA-1 | Japonica | Indica   |        | Os05g0451900 | OsR498G0510964300.01.T03 | O-fucosyltransferase family protein (Fragment)                   |
| maker-5-augustus-gene-232.45-mRNA-1 | Japonica | NA       |        | Os05g0451300 | OsR498G0510962600.01.T01 | Maternal effect embryo arrest                                    |
| maker-5-augustus-gene-233.0-mRNA-1  | Japonica | NA       |        | Os05g0453700 | OsR498G0510970700.01.T01 | Usp domain-containing protein                                    |
| maker-5-augustus-gene-233.10-mRNA-1 | Japonica | Indica   | Kinase | Os11g0620500 | OsR498G0510972100.01.T01 | Pollen receptor-like kinase 6                                    |
| maker-5-augustus-gene-233.13-mRNA-1 | Japonica | NA       |        | Os05g0452900 | OsR498G0510956400.01.T02 | Sphingomyelin synthase-like domain containing protein            |
| maker-5-augustus-gene-233.20-mRNA-1 | Japonica | NA       |        | Os05g0453300 | OsR498G0510968600.01.T01 |                                                                  |
| maker-5-augustus-gene-233.22-mRNA-1 | Japonica | NA       |        |              | OsR498G0510969800.01.T01 | Guanylyl cyclase                                                 |
| maker-5-augustus-gene-233.3-mRNA-1  | Japonica | NA       |        | Os05g0453800 | OsR498G0510970900.01.T02 | Sld5 domain-containing protein (Fragment)                        |
| maker-5-augustus-gene-233.7-mRNA-1  | Japonica | NA       |        | Os05g0454200 | OsR498G0510971900.01.T01 | PRONE domain-containing protein (Fragment)                       |
| maker-5-augustus-gene-234.31-mRNA-1 | Japonica | NA       |        | Os05g0455200 | OsR498G0510974500.01.T01 | BEL1-like homeodomain protein 9                                  |
| maker-5-augustus-gene-234.34-mRNA-1 | Japonica | NA       |        |              | OsR498G0510976100.01.T04 | Transcription factor bHLH104 like                                |
| maker-5-augustus-gene-234.37-mRNA-1 | Japonica | NA       |        |              | OsR498G0510976700.01.T03 |                                                                  |
| maker-5-augustus-gene-234.42-mRNA-1 | Japonica | NA       |        | Os05g0455800 | OsR498G0510977100.01.T02 | Yip1 domain-containing protein                                   |
| maker-5-augustus-gene-234.46-mRNA-1 | Japonica | NA       |        | Os05g0454500 | OsR498G0510972600.01.T05 |                                                                  |
| maker-5-augustus-gene-234.50-mRNA-1 | Japonica | NA       |        | Os05g0455500 | OsR498G0510976400.01.T01 | Delta-1-pyrroline-5-carboxylate synthase                         |
| maker-5-augustus-gene-234.55-mRNA-1 | Japonica | NA       |        | Os05g0455700 | OsR498G0510977000.01.T01 | UMP pyrophosphorylase                                            |
| maker-5-augustus-gene-235.0-mRNA-1  | Japonica | NA       |        | Os05g0456500 | OsR498G0510978500.01.T01 |                                                                  |
| maker-5-augustus-gene-235.10-mRNA-1 | Japonica | NA       |        | Os05g0456000 | OsR498G0510977600.01.T01 | Mitochondrial glycoprotein family protein, putative isoform 1    |
| maker-5-augustus-gene-235.12-mRNA-1 | Japonica | Indica   |        | Os05g0456200 | OsR498G0510978000.01.T01 | Aldo/keto reductase family oxidoreductase                        |
| maker-5-augustus-gene-235.17-mRNA-1 | Japonica | NA       |        | Os05g0456300 | OsR498G0510978200.01.T01 | Ald-keto reductase family 4 member C-10 like                     |
| maker-5-augustus-gene-235.2-mRNA-1  | Japonica | NA       |        |              |                          | Putative transcriptional regulator, MerR family                  |
| maker-5-augustus-gene-235.20-mRNA-1 | Japonica | NA       |        |              | OsR498G0510979400.01.T05 | Ultraviolet-B receptor UVR8                                      |
| maker-5-augustus-gene-235.25-mRNA-1 | Japonica | Indica   |        | Os01g0846300 | OsR498G0510979800.01.T01 | Protein-serine/threonine phosphatase                             |
| maker-5-augustus-gene-235.29-mRNA-1 | Japonica | NA       |        | Os05g0457700 | OsR498G0510980400.01.T02 |                                                                  |
| maker-5-augustus-gene-235.35-mRNA-1 | Japonica | NA       |        | Os05g0458100 | OsR498G0510981600.01.T02 | Peptidylprolyl isomerase                                         |
| maker-5-augustus-gene-235.37-mRNA-1 | Japonica | Indica   |        | Os05g0458300 | OsR498G0510982000.01.T01 | Laccase                                                          |
| maker-5-augustus-gene-235.4-mRNA-1  | Japonica | NA       |        | Os05g0457800 | OsR498G0510980700.01.T01 | PlsC domain-containing protein                                   |
| maker-5-augustus-gene-235.6-mRNA-1  | Japonica | NA       |        | Os05g0458000 | OsR498G0510981300.01.T01 | S-acyltransferase                                                |
| maker-5-augustus-gene-236.29-mRNA-1 | Japonica | NA       |        | Os05g0458400 | OsR498G0510982500.01.T02 | Mitochondrial FTSH metalloprotease                               |
| maker-5-augustus-gene-236.32-mRNA-1 | Japonica | NA       |        | Os05g0458600 | OsR498G0510983700.01.T01 | Laccase                                                          |
| maker-5-augustus-gene-236.35-mRNA-1 | Japonica | NA       |        | Os05g0459400 | OsR498G0510986100.01.T04 | Kinesin-like protein KIN-10C                                     |
| maker-5-augustus-gene-236.41-mRNA-1 | Japonica | Indica   |        | Os05g0459600 | OsR498G0510986700.01.T01 | O-fucosyltransferase family protein (Fragment)                   |
| maker-5-augustus-gene-236.46-mRNA-1 | Japonica | NA       |        | Os05g0459700 | OsR498G0510987100.01.T01 | Fasciclin-like arabinogalactan protein 4                         |
| maker-5-augustus-gene-236.48-mRNA-1 | Japonica | NA       |        | Os05g0459900 | OsR498G0510987900.01.T04 | 60S ribosomal protein L36                                        |
| maker-5-augustus-gene-236.50-mRNA-1 | Japonica | NA       |        | Os05g0458600 | OsR498G0510983700.01.T01 | Laccase                                                          |
| maker-5-augustus-gene-236.53-mRNA-1 | Japonica | NA       |        | Os05g0459000 | OsR498G0510984600.01.T02 | Myb transcript factor 1                                          |
| maker-5-augustus-gene-236.57-mRNA-1 | Japonica | NA       |        | Os05g0460000 | OsR498G0510988400.01.T01 | probable mediator of RNA polymerase II transcription subunit 37c |
| maker-5-augustus-gene-237.0-mRNA-1  | Japonica | NA       |        | Os05g0460200 | OsR498G0510989100.01.T01 | Ubiquitin-conjugating enzyme                                     |
| maker-5-augustus-gene-237.11-mRNA-1 | Japonica | NA       |        | Os05g0460600 | OsR498G0510990000.01.T02 | GTP cyclohydrolase II                                            |
| maker-5-augustus-gene-237.16-mRNA-1 | Japonica | NA       |        | Os05g0460700 | OsR498G0510990200.01.T01 | RplQ                                                             |
| maker-5-augustus-gene-237.20-mRNA-1 | Japonica | NA       |        | Os05g0460800 | OsR498G0510990400.01.T05 | Very-long-chain (3R)-3-hydroxyacyl-CoA dehydratase               |
| maker-5-augustus-gene-237.26-mRNA-1 | Japonica | NA       |        | Os05g0461000 | OsR498G0510991000.01.T01 | Coatomer subunit zeta                                            |
| maker-5-augustus-gene-237.29-mRNA-1 | Japonica | NA       |        | Os05g0461300 | OsR498G0510991600.01.T02 | RAB GTPase homolog 8                                             |
| maker-5-augustus-gene-237.3-mRNA-1  | Japonica | Japonica |        | Os05g0460500 | OsR498G0305687300.01.T02 | Histone domain-containing protein                                |

|                                     |          |          |               |              |                          |                                                                          |
|-------------------------------------|----------|----------|---------------|--------------|--------------------------|--------------------------------------------------------------------------|
| maker-5-augustus-gene-237.32-mRNA-1 | Japonica | NA       |               | Os05g0461400 | OsR498G0510992200.01.T02 |                                                                          |
| maker-5-augustus-gene-237.34-mRNA-1 | Japonica | NA       |               | Os05g0462000 | OsR498G0510994000.01.T01 | Putative angiotensin-converting enzyme 2                                 |
| maker-5-augustus-gene-237.5-mRNA-1  | Japonica | NA       |               | Os05g0461900 | OsR498G0510993700.01.T03 | Metal tolerance protein 6                                                |
| maker-5-augustus-gene-238.40-mRNA-1 | Japonica | NA       |               | Os09g0497500 | OsR498G0917745200.01.T01 | F-box domain-containing protein (Fragment)                               |
| maker-5-augustus-gene-238.42-mRNA-1 | Japonica | NA       |               | Os05g0463400 | OsR498G0510999500.01.T03 | PWWP domain-containing protein                                           |
| maker-5-augustus-gene-238.45-mRNA-1 | Japonica | NA       |               |              | OsR498G0510999700.01.T01 | PWWP domain-containing protein                                           |
| maker-5-augustus-gene-238.47-mRNA-1 | Japonica | NA       |               |              | OsR498G0511001100.01.T01 | DNA helicase                                                             |
| maker-5-augustus-gene-238.53-mRNA-1 | Japonica | Indica   |               | Os05g0462400 | OsR498G0510996600.01.T01 | Phosphatidate phosphatase                                                |
| maker-5-augustus-gene-238.58-mRNA-1 | Japonica | NA       |               | Os05g0462600 | OsR498G0510997600.01.T01 | PCI domain-containing protein                                            |
| maker-5-augustus-gene-238.66-mRNA-1 | Japonica | NA       | Kinase-TM     | Os05g0463000 | OsR498G0510998400.01.T01 | Putative serine/threonine-protein kinase PBL26                           |
| maker-5-augustus-gene-238.68-mRNA-1 | Japonica | NA       |               | Os05g0463300 | OsR498G0510999400.01.T01 | IQ-domain 3                                                              |
| maker-5-augustus-gene-238.70-mRNA-1 | Japonica | Indica   |               | Os05g0463800 | OsR498G0511000000.01.T03 | Nuclear Transcription Factor Y Subunit B                                 |
| maker-5-augustus-gene-238.73-mRNA-1 | Japonica | NA       |               |              | OsR498G0511000600.01.T01 | HECT domain-containing protein-like protein (Fragment)                   |
| maker-5-augustus-gene-239.0-mRNA-1  | Japonica | NA       |               | Os05g0465800 | OsR498G0511004700.01.T05 | Respiratory burst oxidase protein A                                      |
| maker-5-augustus-gene-239.11-mRNA-1 | Japonica | NA       |               | Os05g0466100 | OsR498G0511005600.01.T01 | CCT domain-containing protein (Fragment)                                 |
| maker-5-augustus-gene-239.13-mRNA-1 | Japonica | NA       |               | Os05g0466200 | OsR498G0511006000.01.T01 | NAB domain-containing protein                                            |
| maker-5-augustus-gene-239.15-mRNA-1 | Japonica | NA       |               | Os05g0466700 | OsR498G0511006800.01.T01 | Chlorophyll A-B binding family protein                                   |
| maker-5-augustus-gene-239.5-mRNA-1  | Japonica | NA       |               | Os05g0465100 | OsR498G0511004000.01.T04 | Rab-GAP TBC domain-containing protein                                    |
| maker-5-augustus-gene-239.9-mRNA-1  | Japonica | NA       |               | Os05g0465400 | OsR498G0511004400.01.T01 | Pre-mRNA-splicing factor cwc22 like                                      |
| maker-5-augustus-gene-24.0-mRNA-1   | Japonica | NA       |               | Os05g0141700 | OsR498G0509713700.01.T03 | Phosphoglycerate mutase-like protein AT74                                |
| maker-5-augustus-gene-24.12-mRNA-1  | Japonica | NA       |               | Os05g0143300 | OsR498G0509720600.01.T01 | Helicase                                                                 |
| maker-5-augustus-gene-24.2-mRNA-1   | Japonica | NA       |               |              | OsR498G0509720300.01.T03 | S-adenosyl-L-methionine-dependent methyltransferases superfamily protein |
| maker-5-augustus-gene-24.9-mRNA-1   | Japonica | NA       |               |              | OsR498G0509720900.01.T01 | DNA replication complex GINS protein SLD5                                |
| maker-5-augustus-gene-240.0-mRNA-1  | Japonica | Indica   |               | Os01g0833100 | OsR498G0511007500.01.T01 | FCP1 homology domain-containing protein (Fragment)                       |
| maker-5-augustus-gene-240.11-mRNA-1 | Japonica | NA       |               | Os05g0467700 | OsR498G0511011900.01.T01 | DUF1618 domain-containing protein (Fragment)                             |
| maker-5-augustus-gene-240.13-mRNA-1 | Japonica | NA       |               | Os05g0468100 | OsR498G0511013500.01.T01 | DUF1618 domain-containing protein (Fragment)                             |
| maker-5-augustus-gene-240.15-mRNA-1 | Japonica | Indica   |               | Os05g0468200 | OsR498G0511013900.01.T01 | DUF1618 domain-containing protein (Fragment)                             |
| maker-5-augustus-gene-240.17-mRNA-1 | Japonica | NA       |               | Os05g0468400 | OsR498G0511014100.01.T01 | DUF1618 domain-containing protein (Fragment)                             |
| maker-5-augustus-gene-240.19-mRNA-1 | Japonica | Indica   | Kinase        | Os05g0466900 | OsR498G0511007800.01.T01 | Putative serine/threonine-protein kinase dyrk2                           |
| maker-5-augustus-gene-240.28-mRNA-1 | Japonica | NA       |               | Os05g0467000 | OsR498G0511008400.01.T02 | Calcium-dependent protein kinase 16                                      |
| maker-5-augustus-gene-240.3-mRNA-1  | Japonica | NA       |               | Os05g0467300 | OsR498G0511009100.01.T01 |                                                                          |
| maker-5-augustus-gene-240.31-mRNA-1 | Japonica | Japonica |               | Os05g0467600 | OsR498G0511011600.01.T01 |                                                                          |
| maker-5-augustus-gene-240.34-mRNA-1 | Japonica | NA       |               | Os05g0468500 | OsR498G0511014400.01.T01 | Gdsl esterase lipase                                                     |
| maker-5-augustus-gene-240.7-mRNA-1  | Japonica | NA       |               | Os05g0467400 | OsR498G0511009500.01.T01 | DUF1618 domain-containing protein (Fragment)                             |
| maker-5-augustus-gene-240.9-mRNA-1  | Japonica | NA       |               |              | OsR498G0511010100.01.T01 |                                                                          |
| maker-5-augustus-gene-241.0-mRNA-1  | Japonica | Japonica |               | Os05g0468600 | OsR498G0511014500.01.T02 | UTP--glucose-1-phosphate uridylyltransferase 3 chloroplastic             |
| maker-5-augustus-gene-241.10-mRNA-1 | Japonica | NA       |               | Os05g0469600 | OsR498G0511018700.01.T03 | Pyruvate decarboxylase                                                   |
| maker-5-augustus-gene-241.14-mRNA-1 | Japonica | NA       |               |              | OsR498G0511019900.01.T01 |                                                                          |
| maker-5-augustus-gene-241.16-mRNA-1 | Japonica | NA       |               | Os05g0470000 | OsR498G0511019800.01.T01 | Protein trichome birefringence-like 28/ESKIMO 1                          |
| maker-5-augustus-gene-241.5-mRNA-1  | Japonica | NA       |               | Os05g0468700 | OsR498G0511014900.01.T01 | Ammonium transporter                                                     |
| maker-5-augustus-gene-241.7-mRNA-1  | Japonica | NA       |               |              | OsR498G0511017500.01.T01 | FBD domain-containing protein                                            |
| maker-5-augustus-gene-241.8-mRNA-1  | Japonica | NA       |               | Os05g0469600 | OsR498G0511018100.01.T01 | Pyruvate decarboxylase                                                   |
| maker-5-augustus-gene-242.0-mRNA-1  | Japonica | NA       |               | Os05g0471800 |                          | Far-red impaired response protein-like                                   |
| maker-5-augustus-gene-242.13-mRNA-1 | Japonica | NA       |               |              | OsR498G0511025200.01.T02 | Methyltransferase                                                        |
| maker-5-augustus-gene-242.17-mRNA-1 | Japonica | NA       |               | Os05g0472300 | OsR498G0511025800.01.T01 | POP4 domain-containing protein (Fragment)                                |
| maker-5-augustus-gene-242.3-mRNA-1  | Japonica | NA       |               | Os05g0470800 | OsR498G0511020800.01.T01 | Sorting and assembly machinery component like                            |
| maker-5-augustus-gene-242.5-mRNA-1  | Japonica | NA       | Kinase-LRR-TM | Os05g0471000 | OsR498G0511021200.01.T03 | Inactive receptor-like serine/threonine-protein kinase (Fragment)        |
| maker-5-augustus-gene-243.46-mRNA-1 | Japonica | Indica   |               | Os05g0472700 | OsR498G0511026300.01.T01 | Metal ion transporter ZIP8                                               |
| maker-5-augustus-gene-243.47-mRNA-1 | Japonica | NA       |               |              |                          | Metal ion transporter ZIP5                                               |
| maker-5-augustus-gene-243.54-mRNA-1 | Japonica | NA       |               | Os05g0472700 | OsR498G0511026900.01.T01 | Metal ion transporter ZIP8                                               |
| maker-5-augustus-gene-243.56-mRNA-1 | Japonica | NA       |               | Os05g0473300 | OsR498G0511028500.01.T02 | Ethylene-responsive element binding factor 5                             |
| maker-5-augustus-gene-243.58-mRNA-1 | Japonica | NA       |               | Os05g0473400 | OsR498G0511028700.01.T01 | Cation/H(+) antiporter 18 isoform A                                      |
| maker-5-augustus-gene-243.60-mRNA-1 | Japonica | Indica   |               | Os01g0827200 | OsR498G0511030100.01.T01 | PX domain-containing protein (Fragment)                                  |
| maker-5-augustus-gene-243.62-mRNA-1 | Japonica | Indica   |               | Os01g0826900 | OsR498G0511030100.01.T06 | Protein RETICULATA-RELATED 6 chloroplastic                               |
| maker-5-augustus-gene-243.64-mRNA-1 | Japonica | NA       |               | Os05g0474600 |                          | Aldose reductase                                                         |
| maker-5-augustus-gene-243.66-mRNA-1 | Japonica | NA       |               |              |                          | Phytanoyl-CoA dioxygenase                                                |
| maker-5-augustus-gene-244.0-mRNA-1  | Japonica | NA       |               | Os05g0475300 | OsR498G0511033500.01.T01 | Target of Myb protein 1-like                                             |
| maker-5-augustus-gene-244.12-mRNA-1 | Japonica | NA       |               |              |                          | Transposon protein, putative, Mutator sub-class, expressed               |
| maker-5-augustus-gene-244.15-mRNA-1 | Japonica | NA       |               |              |                          | Vacuolar protein sorting-associated protein 11-like protein              |
| maker-5-augustus-gene-244.2-mRNA-1  | Japonica | NA       |               | Os05g0475700 | OsR498G0511036300.01.T01 | Nodulin-like domain-containing protein (Fragment)                        |
| maker-5-augustus-gene-244.4-mRNA-1  | Japonica | NA       |               | Os05g0474800 | OsR498G0511031400.01.T01 | Transcription factor WRKY33                                              |



|                                     |          |          |               |              |                          |                                                                              |
|-------------------------------------|----------|----------|---------------|--------------|--------------------------|------------------------------------------------------------------------------|
| maker-5-augustus-gene-244.6-mRNA-1  | Japonica | NA       |               | Os05g0474900 | OsR498G0511032000.01.T02 | Putative Senescence associated protein 20                                    |
| maker-5-augustus-gene-245.40-mRNA-1 | Japonica | NA       |               | Os05g0476100 | OsR498G0511037900.01.T01 | DNA helicase                                                                 |
| maker-5-augustus-gene-245.42-mRNA-1 | Japonica | NA       |               | Os05g0476200 | OsR498G0511038100.01.T02 | DNA replication licensing factor MCM3                                        |
| maker-5-augustus-gene-245.46-mRNA-1 | Japonica | Indica   |               | Os05g0476400 | OsR498G0511039400.01.T01 | CHALLAH-LIKE 1, EPIDERMAL PATTERNING FACTOR-LIKE protein 5                   |
| maker-5-augustus-gene-245.48-mRNA-1 | Japonica | NA       |               | Os05g0477500 |                          |                                                                              |
| maker-5-augustus-gene-245.51-mRNA-1 | Japonica | NA       |               | Os05g0477600 | OsR498G0511044800.01.T01 | Expansin                                                                     |
| maker-5-augustus-gene-245.53-mRNA-1 | Japonica | Japonica |               | Os05g0477800 | OsR498G0511045600.01.T01 | STAS domain-containing protein                                               |
| maker-5-augustus-gene-246.40-mRNA-1 | Japonica | NA       | Kinase-LRR-TM | Os05g0478300 | OsR498G0511047500.01.T01 | Protein kinase domain-containing protein (Fragment)                          |
| maker-5-augustus-gene-246.42-mRNA-1 | Japonica | NA       |               | Os06g0607300 |                          | Transposable element protein, putative                                       |
| maker-5-augustus-gene-246.44-mRNA-1 | Japonica | NA       |               |              | OsR498G0511048600.01.T01 | WRKY domain-containing protein (Fragment)                                    |
| maker-5-augustus-gene-246.46-mRNA-1 | Japonica | NA       |               |              | OsR498G0203341500.01.T01 |                                                                              |
| maker-5-augustus-gene-246.48-mRNA-1 | Japonica | Japonica | NBS-TM        | Os05g0479700 | OsR498G0511050000.01.T01 | NBS-LRR disease resistance protein homologue-like                            |
| maker-5-augustus-gene-246.50-mRNA-1 | Japonica | NA       |               | Os05g0479900 | OsR498G0511051000.01.T03 | Protein ENHANCED DISEASE RESISTANCE 4                                        |
| maker-5-augustus-gene-247.0-mRNA-1  | Japonica | NA       | Kinase-TM     |              | OsR498G0511051300.01.T01 | Serine/threonine-protein kinase STN8 chloroplastic                           |
| maker-5-augustus-gene-247.24-mRNA-1 | Japonica | NA       |               | Os05g0481800 | OsR498G0511057700.01.T01 | Pentatricopeptide repeat-containing protein                                  |
| maker-5-augustus-gene-247.33-mRNA-1 | Japonica | NA       |               | Os05g0481400 | OsR498G0511055600.01.T01 | TF-B3 domain-containing protein                                              |
| maker-5-augustus-gene-247.37-mRNA-1 | Japonica | NA       |               | Os05g0481500 | OsR498G0511056600.01.T03 | KH domain-containing protein SPIN1                                           |
| maker-5-augustus-gene-247.44-mRNA-1 | Japonica | NA       |               |              | OsR498G0511057600.01.T01 | Heat-inducible transcription repressor                                       |
| maker-5-augustus-gene-248.50-mRNA-1 | Japonica | NA       |               | Os05g0482400 | OsR498G0511060700.01.T01 |                                                                              |
| maker-5-augustus-gene-248.52-mRNA-1 | Japonica | NA       |               | Os05g0482600 | OsR498G0511061500.01.T02 | WD40/YVTN repeat-like-containing domain containing protein                   |
| maker-5-augustus-gene-248.59-mRNA-1 | Japonica | NA       |               | Os05g0482700 | OsR498G0511061800.01.T03 | 2,3-bisphosphoglycerate-independent phosphoglycerate mutase                  |
| maker-5-augustus-gene-249.0-mRNA-1  | Japonica | NA       |               | Os08g0514300 | OsR498G0408819000.01.T01 | Ulp1 protease family, C-terminal catalytic domain containing protein, expres |
| maker-5-augustus-gene-249.12-mRNA-1 | Japonica | NA       |               |              | OsR498G0511073400.01.T02 | Hexosyltransferase                                                           |
| maker-5-augustus-gene-249.15-mRNA-1 | Japonica | Indica   |               | Os01g0816700 | OsR498G0511074200.01.T01 | L-ascorbate oxidase like                                                     |
| maker-5-augustus-gene-249.2-mRNA-1  | Japonica | NA       |               | Os05g0485300 | OsR498G0511072500.01.T01 | TLC domain-containing protein (Fragment)                                     |
| maker-5-augustus-gene-25.37-mRNA-1  | Japonica | Indica   | Kinase-TM     | Os11g0271100 | OsR498G0509721500.01.T06 | Mitogen-activated protein kinase                                             |
| maker-5-augustus-gene-25.45-mRNA-1  | Japonica | NA       |               | Os05g0144100 | OsR498G0509722700.01.T01 | Transducin family protein / WD-40 repeat family protein                      |
| maker-5-augustus-gene-25.50-mRNA-1  | Japonica | NA       |               | Os05g0144400 | OsR498G0509723500.01.T01 | Serine/threonine-protein phosphatase                                         |
| maker-5-augustus-gene-25.60-mRNA-1  | Japonica | NA       |               |              | OsR498G0509722200.01.T01 | DUF295 domain-containing protein (Fragment)                                  |
| maker-5-augustus-gene-25.61-mRNA-1  | Japonica | Indica   |               | Os05g0143800 | OsR498G0509722400.01.T01 | Indole-3-acetic acid-amido synthetase                                        |
| maker-5-augustus-gene-25.66-mRNA-1  | Japonica | NA       |               |              |                          | Putative membrane-bound O-acyltransferase C24H6.01c                          |
| maker-5-augustus-gene-25.71-mRNA-1  | Japonica | NA       |               |              | OsR498G0509723000.01.T01 | Ribosome biogenesis protein NOP53                                            |
| maker-5-augustus-gene-25.76-mRNA-1  | Japonica | NA       |               | Os05g0144300 | OsR498G0509723200.01.T03 | Chromatin complex subunit A                                                  |
| maker-5-augustus-gene-25.80-mRNA-1  | Japonica | NA       |               | Os05g0144800 | OsR498G0509724600.01.T02 | General transcription and DNA repair factor IIH helicase subunit XPD         |
| maker-5-augustus-gene-250.0-mRNA-1  | Japonica | NA       |               |              | OsR498G0511076100.01.T01 | NOT transcription complex subunit like                                       |
| maker-5-augustus-gene-250.15-mRNA-1 | Japonica | NA       |               |              |                          | Protein BREAST CANCER SUSCEPTIBILITY 1-like protein                          |
| maker-5-augustus-gene-250.20-mRNA-1 | Japonica | NA       |               | Os05g0486700 | OsR498G0511077000.01.T02 | TRASH domain-containing protein                                              |
| maker-5-augustus-gene-250.4-mRNA-1  | Japonica | NA       |               |              | OsR498G0511077300.01.T01 |                                                                              |
| maker-5-augustus-gene-250.6-mRNA-1  | Japonica | NA       | Kinase-LRR-TM | Os05g0486100 | OsR498G0511075400.01.T01 | Putative leucine-rich repeat receptor-like protein kinase                    |
| maker-5-augustus-gene-251.0-mRNA-1  | Japonica | NA       |               | Os05g0487300 | OsR498G0511077900.01.T01 | Transmembrane protein 135                                                    |
| maker-5-augustus-gene-251.15-mRNA-1 | Japonica | NA       |               | Os05g0488100 | OsR498G0511079200.01.T02 |                                                                              |
| maker-5-augustus-gene-251.18-mRNA-1 | Japonica | NA       |               | Os05g0488600 | OsR498G0511079800.01.T01 | HTH myb-type domain-containing protein                                       |
| maker-5-augustus-gene-251.2-mRNA-1  | Japonica | Japonica |               | Os05g0488000 | OsR498G0511078900.01.T01 | RBR-type E3 ubiquitin transferase                                            |
| maker-5-augustus-gene-251.24-mRNA-1 | Japonica | NA       |               | Os05g0489600 | OsR498G0511081600.01.T01 | ADP-ribosylation factor A1B                                                  |
| maker-5-augustus-gene-251.4-mRNA-1  | Japonica | NA       |               | Os05g0488900 | OsR498G0511080300.01.T01 | NADH-cytochrome b5 reductase                                                 |
| maker-5-augustus-gene-251.8-mRNA-1  | Japonica | NA       |               | Os05g0489000 | OsR498G0511080700.01.T04 | Type I inositol polyphosphate 5-phosphatase 10                               |
| maker-5-augustus-gene-252.40-mRNA-1 | Japonica | NA       |               | Os05g0489700 | OsR498G0511082300.01.T04 | ABSCISIC ACID-INSENSITIVE 5-like protein 2                                   |
| maker-5-augustus-gene-252.48-mRNA-1 | Japonica | NA       |               | Os05g0490200 | OsR498G0511083300.01.T01 | Endoplasmic reticulum vesicle transporter                                    |
| maker-5-augustus-gene-252.54-mRNA-1 | Japonica | NA       |               | Os05g0489800 | OsR498G0511082600.01.T01 | Centromeric histone 3                                                        |
| maker-5-augustus-gene-252.57-mRNA-1 | Japonica | NA       | Kinase-TM     | Os05g0489900 | OsR498G0511082800.01.T01 | Calcium and calmodulin-dependent kinase                                      |
| maker-5-augustus-gene-252.59-mRNA-1 | Japonica | Japonica |               | Os05g0490300 | OsR498G0511083600.01.T04 | F-box domain-containing protein                                              |
| maker-5-augustus-gene-252.61-mRNA-1 | Japonica | NA       |               |              | OsR498G0511085400.01.T04 | UV radiation resistance-associated gene protein isoform X2                   |
| maker-5-augustus-gene-252.64-mRNA-1 | Japonica | Indica   |               | Os05g0490600 | OsR498G0511085600.01.T01 | Transcription factor GAMYB                                                   |
| maker-5-augustus-gene-252.67-mRNA-1 | Japonica | Indica   |               | Os01g0811100 | OsR498G0511086400.01.T01 | Proteasome endopeptidase complex                                             |
| maker-5-augustus-gene-252.72-mRNA-1 | Japonica | NA       |               | Os05g0490900 | OsR498G0511086600.01.T01 | Dimethylaniline monooxygenase [N-oxide-forming] 1                            |
| maker-5-augustus-gene-252.74-mRNA-1 | Japonica | NA       |               | Os05g0491000 | OsR498G0511087000.01.T03 | Probable calcium-binding protein CML9                                        |
| maker-5-augustus-gene-252.76-mRNA-1 | Japonica | NA       |               | Os05g0491100 | OsR498G0511087400.01.T01 | Calmodulin                                                                   |
| maker-5-augustus-gene-252.78-mRNA-1 | Japonica | NA       |               | Os05g0491200 | OsR498G0511087600.01.T02 | 5'-AMP-activated protein kinase beta subunit                                 |
| maker-5-augustus-gene-252.82-mRNA-1 | Japonica | NA       | LRR-TM        | Os05g0491400 | OsR498G0511088200.01.T01 | Somatic embryoproteinsis receptor kinase 5                                   |
| maker-5-augustus-gene-252.84-mRNA-1 | Japonica | NA       |               | Os05g0491500 | OsR498G0511088400.01.T03 | HTH myb-type domain-containing protein                                       |
| maker-5-augustus-gene-253.36-mRNA-1 | Japonica | Indica   |               | Os01g0279900 | OsR498G0511090500.01.T01 | Transcription factor PERANTHIA                                               |

|                                     |          |          |           |              |                          |                                                           |
|-------------------------------------|----------|----------|-----------|--------------|--------------------------|-----------------------------------------------------------|
| maker-5-augustus-gene-253.38-mRNA-1 | Japonica | NA       | Kinase-TM | Os05g0493100 | OsR498G0511092300.01.T01 | Cysteine-rich receptor-like protein kinase 25             |
| maker-5-augustus-gene-253.41-mRNA-1 | Japonica | NA       |           | Os05g0493500 | OsR498G0511092900.01.T01 | Cyclin laZm                                               |
| maker-5-augustus-gene-253.45-mRNA-1 | Japonica | NA       |           | Os05g0493800 | OsR498G0511094300.01.T01 | Auxin-induced protein 5NG4 (Fragment)                     |
| maker-5-augustus-gene-253.48-mRNA-1 | Japonica | NA       |           | Os05g0494000 | OsR498G0511095500.01.T02 | Coumaroyl shikimate 3-hydroxylase 1                       |
| maker-5-augustus-gene-253.51-mRNA-1 | Japonica | NA       | Kinase-TM | Os05g0491900 | OsR498G0511090200.01.T01 | Calcium-dependent protein kinase 34                       |
| maker-5-augustus-gene-253.54-mRNA-1 | Japonica | Japonica |           | Os05g0493600 | OsR498G0511093400.01.T02 | Glycosyltransferase                                       |
| maker-5-augustus-gene-253.56-mRNA-1 | Japonica | NA       |           | Os05g0493500 | OsR498G0511094800.01.T01 | Cyclin N-terminal domain-containing protein               |
| maker-5-augustus-gene-254.0-mRNA-1  | Japonica | NA       |           | Os05g0494100 | OsR498G0511095700.01.T06 | dr1-associated corepressor                                |
| maker-5-augustus-gene-254.16-mRNA-1 | Japonica | NA       |           | Os05g0495600 | OsR498G0511099700.01.T01 | Calcium-transporting ATPase                               |
| maker-5-augustus-gene-254.21-mRNA-1 | Japonica | Japonica |           | Os05g0495700 | OsR498G0511100700.01.T01 | Glycerol-3-phosphate dehydrogenase                        |
| maker-5-augustus-gene-254.24-mRNA-1 | Japonica | NA       |           | Os05g0495900 | OsR498G0511101500.01.T01 | Glucan endo-1,3-beta-glucosidase GVI                      |
| maker-5-augustus-gene-254.26-mRNA-1 | Japonica | Indica   |           | Os05g0494200 | OsR498G0511096000.01.T01 | Cysteine proteinase inhibitor                             |
| maker-5-augustus-gene-254.5-mRNA-1  | Japonica | NA       |           |              | OsR498G0511098300.01.T01 | Transcription elongation factor spt6                      |
| maker-5-augustus-gene-255.47-mRNA-1 | Japonica | NA       |           | Os05g0496100 |                          | Eukaryotic translation initiation factor 3 subunit J      |
| maker-5-augustus-gene-255.49-mRNA-1 | Japonica | Indica   |           | Os06g0668200 | OsR498G0511102000.01.T03 | Phosphoglycerate kinase                                   |
| maker-5-augustus-gene-255.55-mRNA-1 | Japonica | NA       |           | Os05g0496400 | OsR498G0511102600.01.T02 | Metacaspase-4                                             |
| maker-5-augustus-gene-255.56-mRNA-1 | Japonica | Japonica |           | Os05g0496500 | OsR498G0511102600.01.T01 | Metacaspase-6                                             |
| maker-5-augustus-gene-256.48-mRNA-1 | Japonica | Indica   |           | Os05g0497650 | OsR498G0511106300.01.T01 | Putative E3 ubiquitin-protein ligase RING1a               |
| maker-5-augustus-gene-256.53-mRNA-1 | Japonica | NA       |           | Os05g0497675 | OsR498G0511106500.01.T02 | S-adenosyl-L-methionine-dependent methyltransferase       |
| maker-5-augustus-gene-256.57-mRNA-1 | Japonica | NA       |           | Os05g0498300 | OsR498G0511109100.01.T03 | DNA mismatch repair                                       |
| maker-5-augustus-gene-256.62-mRNA-1 | Japonica | NA       |           | Os05g0498400 | OsR498G0511109500.01.T05 | Eukaryotic translation initiation factor 1                |
| maker-5-augustus-gene-256.70-mRNA-1 | Japonica | NA       |           |              |                          |                                                           |
| maker-5-augustus-gene-256.73-mRNA-1 | Japonica | NA       |           | Os05g0497700 | OsR498G0511106800.01.T03 | Glyoxysomal processing protease glyoxysomal               |
| maker-5-augustus-gene-256.81-mRNA-1 | Japonica | NA       |           |              | OsR498G0511109800.01.T02 | Myosin heavy chain-related                                |
| maker-5-augustus-gene-256.82-mRNA-1 | Japonica | NA       |           | Os05g0498700 | OsR498G0511110800.01.T03 | DCD domain protein isoform 1                              |
| maker-5-augustus-gene-256.86-mRNA-1 | Japonica | NA       | Kinase-TM | Os05g0498900 | OsR498G0511111400.01.T01 | probable serine/threonine-protein kinase PBL23            |
| maker-5-augustus-gene-257.51-mRNA-1 | Japonica | Indica   |           | Os09g0497500 | OsR498G0511111700.01.T01 | Vignain                                                   |
| maker-5-augustus-gene-257.53-mRNA-1 | Japonica | NA       |           | Os05g0499300 | OsR498G0511112100.01.T01 | Peroxidase                                                |
| maker-5-augustus-gene-257.55-mRNA-1 | Japonica | NA       |           | Os05g0499400 | OsR498G0511112500.01.T01 | Peroxidase                                                |
| maker-5-augustus-gene-257.57-mRNA-1 | Japonica | Japonica |           | Os05g0500500 | OsR498G0511115300.01.T01 | 22.3 kDa class VI heat shock protein isoform X2           |
| maker-5-augustus-gene-257.59-mRNA-1 | Japonica | Indica   |           | Os05g0501200 | OsR498G0511117700.01.T02 | BHLH domain-containing protein                            |
| maker-5-augustus-gene-257.60-mRNA-1 | Japonica | NA       |           | Os05g0501200 | OsR498G0511117700.01.T04 | Transcription factor bHLH123 isoform B                    |
| maker-5-augustus-gene-257.67-mRNA-1 | Japonica | NA       |           |              | OsR498G0511112800.01.T01 | Pheromone shutdown, TraB                                  |
| maker-5-augustus-gene-257.72-mRNA-1 | Japonica | NA       |           | Os05g0500900 | OsR498G0511116600.01.T01 | Indole-3-acetic acid-amido synthetase                     |
| maker-5-augustus-gene-258.0-mRNA-1  | Japonica | NA       | Kinase-TM | Os05g0501400 | OsR498G0511118500.01.T04 | Serine/threonine-protein kinase                           |
| maker-5-augustus-gene-258.11-mRNA-1 | Japonica | Indica   |           | Os01g0780800 | OsR498G0511122100.01.T01 | SAND domain-containing protein                            |
| maker-5-augustus-gene-258.13-mRNA-1 | Japonica | NA       |           | Os05g0501300 | OsR498G0511118000.01.T01 | NAD(P)H dehydrogenase (quinone)                           |
| maker-5-augustus-gene-258.15-mRNA-1 | Japonica | NA       |           | Os05g0493500 | OsR498G0511118400.01.T01 | Cyclin laZm                                               |
| maker-5-augustus-gene-258.19-mRNA-1 | Japonica | NA       |           |              |                          | SPOROCTELESS-like EAR-containing protein 1                |
| maker-5-augustus-gene-258.21-mRNA-1 | Japonica | NA       |           | Os05g0502500 | OsR498G0511122000.01.T03 | Diphthamide biosynthesis protein 3                        |
| maker-5-augustus-gene-258.25-mRNA-1 | Japonica | NA       |           | Os05g0502800 | OsR498G0511122400.01.T01 | H/ACA ribonucleoprotein complex non-core subunit NAF1     |
| maker-5-augustus-gene-258.5-mRNA-1  | Japonica | NA       | LRR-TM    | Os05g0501600 | OsR498G0511119100.01.T01 | Dynein light chain 1, axonemal                            |
| maker-5-augustus-gene-258.8-mRNA-1  | Japonica | NA       |           | Os05g0502000 | OsR498G0511120900.01.T02 | Cyclic nucleotide-binding domain                          |
| maker-5-augustus-gene-259.27-mRNA-1 | Japonica | NA       |           | Os05g0503300 | OsR498G0511123400.01.T03 | Assimilatory sulfite reductase (ferredoxin)               |
| maker-5-augustus-gene-26.0-mRNA-1   | Japonica | NA       |           |              | OsR498G0509725700.01.T01 | RNA-binding                                               |
| maker-5-augustus-gene-26.10-mRNA-1  | Japonica | NA       |           | Os05g0145700 | OsR498G0509726600.01.T04 | PDZ domain-containing protein                             |
| maker-5-augustus-gene-26.18-mRNA-1  | Japonica | NA       |           | Os05g0146900 |                          | PDZ domain-containing protein                             |
| maker-5-augustus-gene-26.2-mRNA-1   | Japonica | NA       |           | Os05g0145400 | OsR498G0509726000.01.T02 | Fibronectin type-III domain-containing protein (Fragment) |
| maker-5-augustus-gene-261.14-mRNA-1 | Japonica | Japonica |           | Os05g0506100 | OsR498G0511141000.01.T01 | DUF569 domain-containing protein (Fragment)               |
| maker-5-augustus-gene-261.16-mRNA-1 | Japonica | Japonica |           | Os05g0506400 | OsR498G0511141600.01.T01 | RING-type domain-containing protein                       |
| maker-5-augustus-gene-261.19-mRNA-1 | Japonica | Japonica |           | Os05g0506500 | OsR498G0511141800.01.T01 | Gdsl esterase/lipase                                      |
| maker-5-augustus-gene-261.22-mRNA-1 | Japonica | NA       |           | Os05g0506600 | OsR498G0511142200.01.T01 | GDSL esterase/lipase                                      |
| maker-5-augustus-gene-261.24-mRNA-1 | Japonica | NA       |           | Os05g0506700 | OsR498G0511142400.01.T01 | GDSL esterase/lipase                                      |
| maker-5-augustus-gene-261.25-mRNA-1 | Japonica | Indica   |           | Os05g0506600 | OsR498G0511142400.01.T01 | GDSL esterase/lipase                                      |
| maker-5-augustus-gene-261.3-mRNA-1  | Japonica | NA       |           |              | OsR498G0511141300.01.T02 | Protein RNA-directed DNA methylation 3                    |
| maker-5-augustus-gene-261.30-mRNA-1 | Japonica | Indica   |           | Os05g0506600 | OsR498G0511143000.01.T01 | GDSL esterase/lipase                                      |
| maker-5-augustus-gene-261.32-mRNA-1 | Japonica | Japonica |           | Os05g0506900 | OsR498G0101111400.01.T01 | Brix domain-containing protein 1                          |
| maker-5-augustus-gene-262.0-mRNA-1  | Japonica | NA       |           | Os05g0508300 | OsR498G0511153900.01.T02 | low-temperature-induced cysteine proteinase               |
| maker-5-augustus-gene-262.3-mRNA-1  | Japonica | NA       |           | Os05g0508400 | OsR498G0511154100.01.T02 | Mannose-binding lectin                                    |
| maker-5-augustus-gene-262.6-mRNA-1  | Japonica | Japonica |           | Os05g0508500 | OsR498G0511154300.01.T02 | Thioredoxin H-type                                        |
| maker-5-augustus-gene-263.38-mRNA-1 | Japonica | Indica   |           | Os05g0508700 | OsR498G0511155300.01.T01 | MATH domain-containing protein                            |

|                                     |          |          |           |              |                          |                                                                        |
|-------------------------------------|----------|----------|-----------|--------------|--------------------------|------------------------------------------------------------------------|
| maker-5-augustus-gene-263.44-mRNA-1 | Japonica | NA       |           | Os05g0508800 | OsR498G0511155500.01.T01 | Toxin PezT                                                             |
| maker-5-augustus-gene-263.50-mRNA-1 | Japonica | NA       |           | Os05g0509200 | OsR498G0511158100.01.T01 | NADH-ubiquinone oxidoreductase 24 kDa subunit                          |
| maker-5-augustus-gene-263.54-mRNA-1 | Japonica | NA       |           |              | OsR498G0511158300.01.T02 | TRUD domain-containing protein (Fragment)                              |
| maker-5-augustus-gene-263.61-mRNA-1 | Japonica | NA       |           | Os05g0509400 | OsR498G0511158600.01.T03 | CRC domain-containing protein TSO1                                     |
| maker-5-augustus-gene-263.65-mRNA-1 | Japonica | NA       |           | Os05g0509500 | OsR498G0511158800.01.T01 | Signal recognition particle 54 kDa protein 2                           |
| maker-5-augustus-gene-263.67-mRNA-1 | Japonica | NA       |           | Os05g0509700 | OsR498G0511160200.01.T03 | Mitochondrially targeted single-stranded DNA binding protein           |
| maker-5-augustus-gene-263.70-mRNA-1 | Japonica | NA       |           | Os05g0509900 | OsR498G0511160600.01.T03 | Transcription initiation factor IIF subunit beta                       |
| maker-5-augustus-gene-263.72-mRNA-1 | Japonica | NA       |           | Os05g0510200 | OsR498G0511161200.01.T01 | Outer membrane OMP85 family protein isoform 5                          |
| maker-5-augustus-gene-264.0-mRNA-1  | Japonica | NA       |           | Os05g0510300 | OsR498G0511161300.01.T02 | USP domain-containing protein (Fragment)                               |
| maker-5-augustus-gene-264.10-mRNA-1 | Japonica | NA       |           | Os05g0511500 | OsR498G0511166900.01.T04 | Lipoyl synthase, chloroplastic                                         |
| maker-5-augustus-gene-264.14-mRNA-1 | Japonica | NA       |           | Os05g0511700 | OsR498G0511167100.01.T04 | Putative rRNA methylase YtqB                                           |
| maker-5-augustus-gene-264.18-mRNA-1 | Japonica | Indica   |           | Os03g0770800 | OsR498G0511162600.01.T01 | Xyloglucan glycosyltransferase 12                                      |
| maker-5-augustus-gene-264.28-mRNA-1 | Japonica | NA       | Kinase    | Os05g0511400 | OsR498G0511165600.01.T06 | AGC (cAMP-dependent cGMP-dependent and protein kinase C) kinase family |
| maker-5-augustus-gene-264.3-mRNA-1  | Japonica | Indica   |           | Os05g0510700 | OsR498G0511162300.01.T02 | BSD domain-containing protein                                          |
| maker-5-augustus-gene-264.35-mRNA-1 | Japonica | NA       |           |              | OsR498G0511167400.01.T01 | Serpin (Serine protease inhibitor)                                     |
| maker-5-augustus-gene-264.37-mRNA-1 | Japonica | NA       |           | Os05g0512000 | OsR498G0511167800.01.T02 | Protein BREAST CANCER SUSCEPTIBILITY 1 like                            |
| maker-5-augustus-gene-264.6-mRNA-1  | Japonica | NA       |           | Os05g0511000 | OsR498G0511164300.01.T03 | TLC domain-containing protein (Fragment)                               |
| maker-5-augustus-gene-265.41-mRNA-1 | Japonica | NA       |           | Os05g0512200 | OsR498G0511168700.01.T02 | Lysine-tRNA ligase                                                     |
| maker-5-augustus-gene-265.45-mRNA-1 | Japonica | NA       |           | Os05g0513100 | OsR498G0511172100.01.T01 | TCP transcription factor                                               |
| maker-5-augustus-gene-265.46-mRNA-1 | Japonica | NA       |           | Os05g0513200 | OsR498G0511173100.01.T01 | FCP1 homology domain-containing protein (Fragment)                     |
| maker-5-augustus-gene-265.52-mRNA-1 | Japonica | NA       |           | Os05g0513300 | OsR498G0511173300.01.T01 | Basic salivary proline-rich protein 2 isoform X1                       |
| maker-5-augustus-gene-265.55-mRNA-1 | Japonica | NA       |           | Os05g0513400 | OsR498G0511173500.01.T01 | Probable magnesium transporter                                         |
| maker-5-augustus-gene-265.60-mRNA-1 | Japonica | NA       |           | Os05g0513800 | OsR498G0511174900.01.T02 | rac-like GTP-binding protein ARAC7                                     |
| maker-5-augustus-gene-265.65-mRNA-1 | Japonica | Indica   |           | Os05g0512400 | OsR498G0511169600.01.T01 | BAG family molecular chaperone regulator 8 chloroplastic               |
| maker-5-augustus-gene-265.67-mRNA-1 | Japonica | NA       |           | Os05g0512500 | OsR498G0511169800.01.T01 | Chromatin modification-related protein EAF7 (Fragment)                 |
| maker-5-augustus-gene-265.71-mRNA-1 | Japonica | Japonica |           | Os05g0513700 | OsR498G0511174200.01.T01 | Beta-arabinofuranosyltransferase RAY1                                  |
| maker-5-augustus-gene-266.0-mRNA-1  | Japonica | NA       |           | Os05g0514300 | OsR498G0511176500.01.T07 | Tubby-like F-box protein 10                                            |
| maker-5-augustus-gene-266.10-mRNA-1 | Japonica | NA       |           |              |                          | Prolyl aminopeptidase                                                  |
| maker-5-augustus-gene-266.8-mRNA-1  | Japonica | NA       |           | Os05g0515200 | OsR498G0511179700.01.T02 | Putative ferulate 5-hydroxylase                                        |
| maker-5-augustus-gene-267.0-mRNA-1  | Japonica | Indica   |           | Os05g0515400 | OsR498G0511180700.01.T01 | Auxin response factor                                                  |
| maker-5-augustus-gene-267.14-mRNA-1 | Japonica | Japonica | Kinase-TM | Os05g0516400 | OsR498G0511182900.01.T01 | Proline-rich receptor-like protein kinase PERK1                        |
| maker-5-augustus-gene-267.16-mRNA-1 | Japonica | NA       |           | Os05g0516600 | OsR498G0511183500.01.T01 | Ras-related protein Rab7                                               |
| maker-5-augustus-gene-267.21-mRNA-1 | Japonica | NA       |           | Os05g0516900 | OsR498G0511184300.01.T05 | Lazarus                                                                |
| maker-5-augustus-gene-267.25-mRNA-1 | Japonica | NA       |           | Os05g0517200 | OsR498G0511185500.01.T01 | Trehalose-phosphatase                                                  |
| maker-5-augustus-gene-267.27-mRNA-1 | Japonica | NA       |           | Os05g0517400 | OsR498G0511185700.01.T01 |                                                                        |
| maker-5-augustus-gene-267.29-mRNA-1 | Japonica | NA       |           | Os05g0517800 | OsR498G0511186300.01.T01 | Potassium-transporting ATPase A chain (Fragment)                       |
| maker-5-augustus-gene-267.31-mRNA-1 | Japonica | Indica   |           | Os05g0517900 | OsR498G0511186500.01.T01 | Cyclic phosphodiesterase                                               |
| maker-5-augustus-gene-267.33-mRNA-1 | Japonica | NA       |           |              | OsR498G0511181800.01.T01 | NAC domain-containing protein                                          |
| maker-5-augustus-gene-267.35-mRNA-1 | Japonica | NA       |           | Os05g0516800 | OsR498G0511184000.01.T01 | Ras-related protein RIC2                                               |
| maker-5-augustus-gene-267.37-mRNA-1 | Japonica | NA       |           |              |                          | Folate gamma-glutamyl hydrolase                                        |
| maker-5-augustus-gene-267.42-mRNA-1 | Japonica | Japonica |           | Os05g0517600 | OsR498G0511186200.01.T01 | Non-symbiotic hemoglobin                                               |
| maker-5-augustus-gene-267.5-mRNA-1  | Japonica | NA       |           | Os05g0515500 | OsR498G0511180900.01.T01 | O-methyltransferase ZRP4                                               |
| maker-5-augustus-gene-267.9-mRNA-1  | Japonica | Indica   |           | Os01g0752800 | OsR498G0511181900.01.T03 | Casein kinase substrate, phosphoprotein PP28                           |
| maker-5-augustus-gene-268.0-mRNA-1  | Japonica | NA       |           | Os05g0518200 | OsR498G0511187500.01.T01 |                                                                        |
| maker-5-augustus-gene-268.2-mRNA-1  | Japonica | NA       |           |              | OsR498G0511190900.01.T02 | Alpha,alpha-trehalose-phosphate synthase                               |
| maker-5-augustus-gene-268.9-mRNA-1  | Japonica | NA       |           | Os05g0518300 | OsR498G0511188200.01.T01 | Anther-specific proline-rich protein APG                               |
| maker-5-augustus-gene-269.10-mRNA-1 | Japonica | NA       |           | Os05g0520300 | OsR498G0511197500.01.T01 | GATA transcription factor                                              |
| maker-5-augustus-gene-269.12-mRNA-1 | Japonica | NA       |           | Os05g0519300 | OsR498G0511194400.01.T01 | Plant-specific domain TIGR01615 family protein expressed               |
| maker-5-augustus-gene-269.14-mRNA-1 | Japonica | NA       |           | Os05g0519400 | OsR498G0511195200.01.T01 | Vesicle-fusing ATPase                                                  |
| maker-5-augustus-gene-269.20-mRNA-1 | Japonica | NA       |           | Os05g0519500 | OsR498G0511195400.01.T04 | Periodic tryptophan protein 2                                          |
| maker-5-augustus-gene-269.23-mRNA-1 | Japonica | NA       |           | Os05g0519700 | OsR498G0511196000.01.T01 | Heat shock protein 101                                                 |
| maker-5-augustus-gene-269.25-mRNA-1 | Japonica | NA       |           | Os05g0519900 | OsR498G0511196600.01.T02 | Dolichyl-diphosphooligosaccharide--protein glycotransferase            |
| maker-5-augustus-gene-269.29-mRNA-1 | Japonica | Indica   |           | Os05g0520100 | OsR498G0511197000.01.T01 | Nuclear pore complex protein NUP35                                     |
| maker-5-augustus-gene-269.33-mRNA-1 | Japonica | NA       |           | Os05g0520200 | OsR498G0511197200.01.T02 | Aminoacyl-tRNA hydrolase                                               |
| maker-5-augustus-gene-27.41-mRNA-1  | Japonica | NA       |           |              | OsR498G0509732900.01.T03 | MI domain-containing protein (Fragment)                                |
| maker-5-augustus-gene-27.65-mRNA-1  | Japonica | NA       |           |              | OsR498G0509732600.01.T01 | BRCT domain-containing DNA repair protein                              |
| maker-5-augustus-gene-27.68-mRNA-1  | Japonica | NA       |           |              | OsR498G0509733200.01.T02 | Putative calcium-binding protein CML22                                 |
| maker-5-augustus-gene-27.71-mRNA-1  | Japonica | NA       |           | Os05g0147400 | OsR498G0509733400.01.T01 | T-complex protein 1 subunit epsilon                                    |
| maker-5-augustus-gene-27.80-mRNA-1  | Japonica | NA       |           | Os05g0148500 |                          | Coiled-coil domain-containing protein SCD2                             |
| maker-5-augustus-gene-270.31-mRNA-1 | Japonica | NA       |           | Os05g0520700 |                          | BTB domain-containing protein                                          |
| maker-5-augustus-gene-270.35-mRNA-1 | Japonica | NA       |           | Os05g0521500 | OsR498G0511203500.01.T02 | ATP-dependent protease La (LON) domain-containing protein-like         |

|                                     |          |          |               |              |                          |                                                                                  |
|-------------------------------------|----------|----------|---------------|--------------|--------------------------|----------------------------------------------------------------------------------|
| maker-5-augustus-gene-270.40-mRNA-1 | Japonica | NA       |               | Os05g0521600 | OsR498G0511203700.01.T01 | Pectinesterase                                                                   |
| maker-5-augustus-gene-270.43-mRNA-1 | Japonica | NA       |               |              | OsR498G0511205300.01.T01 |                                                                                  |
| maker-5-augustus-gene-270.45-mRNA-1 | Japonica | NA       |               |              |                          | Kinesin motor domain-containing protein                                          |
| maker-5-augustus-gene-270.52-mRNA-1 | Japonica | NA       |               |              |                          | Pseudo histidine-containing phosphotransfer protein 5                            |
| maker-5-augustus-gene-270.54-mRNA-1 | Japonica | NA       |               | Os05g0521900 | OsR498G0511204600.01.T03 | IQ-domain 25                                                                     |
| maker-5-augustus-gene-271.0-mRNA-1  | Japonica | NA       |               | Os05g0522500 | OsR498G0511206700.01.T01 | Phosphotransferase                                                               |
| maker-5-augustus-gene-271.11-mRNA-1 | Japonica | NA       |               | Os05g0523300 | OsR498G0511208200.01.T01 | Auxin-responsive protein IAA18                                                   |
| maker-5-augustus-gene-271.7-mRNA-1  | Japonica | Indica   | Kinase-LRR-TM | Os01g0742400 | OsR498G0511207000.01.T01 | Protein kinase family protein with leucine-rich repeat domain                    |
| maker-5-augustus-gene-271.9-mRNA-1  | Japonica | NA       |               | Os05g0523100 |                          |                                                                                  |
| maker-5-augustus-gene-272.40-mRNA-1 | Japonica | Indica   |               | Os05g0524100 | OsR498G0511211300.01.T01 | Oxidative stress 3                                                               |
| maker-5-augustus-gene-272.42-mRNA-1 | Japonica | Japonica |               | Os05g0524300 | OsR498G0101962600.01.T01 | Mitochondrial-processing peptidase subunit alpha                                 |
| maker-5-augustus-gene-272.44-mRNA-1 | Japonica | NA       |               | Os05g0524400 | OsR498G0511212100.01.T01 | ATP-dependent 6-phosphofructokinase                                              |
| maker-5-augustus-gene-272.49-mRNA-1 | Japonica | NA       | Kinase-LRR-TM | Os05g0524500 | OsR498G0511212300.01.T01 | Putative receptor like protein kinase                                            |
| maker-5-augustus-gene-272.52-mRNA-1 | Japonica | Indica   | Kinase-LRR-TM | Os05g0524600 | OsR498G0511212900.01.T03 | Putative serine/threonine-specific receptor protein kinase                       |
| maker-5-augustus-gene-272.63-mRNA-1 | Japonica | Japonica | Kinase-LRR-TM | Os05g0525000 | OsR498G0511214700.01.T01 | Putative serine/threonine-specific receptor protein kinase                       |
| maker-5-augustus-gene-272.65-mRNA-1 | Japonica | NA       | Kinase-LRR-TM | Os05g0525550 | OsR498G0511214700.01.T01 | Putative receptor like protein kinase                                            |
| maker-5-augustus-gene-272.68-mRNA-1 | Japonica | NA       | Kinase-LRR-TM | Os05g0525600 | OsR498G0511215100.01.T01 | Putative leucine-rich repeat receptor-like protein kinase                        |
| maker-5-augustus-gene-272.71-mRNA-1 | Japonica | Indica   | Kinase-LRR-TM | Os05g0525550 | OsR498G0511215300.01.T01 | Putative serine/threonine-specific receptor protein kinase                       |
| maker-5-augustus-gene-272.78-mRNA-1 | Japonica | NA       |               | Os05g0526200 | OsR498G0511216500.01.T01 | Calcium homeostasis regulator                                                    |
| maker-5-augustus-gene-272.80-mRNA-1 | Japonica | NA       |               | Os05g0524200 | OsR498G0511211600.01.T01 | Dual specificity protein phosphatase DSP8                                        |
| maker-5-augustus-gene-273.0-mRNA-1  | Japonica | NA       |               |              |                          | F-box domain-containing protein                                                  |
| maker-5-augustus-gene-273.16-mRNA-1 | Japonica | NA       |               | Os05g0528200 | OsR498G0511222400.01.T01 | 50S ribosomal protein L20, chloroplastic                                         |
| maker-5-augustus-gene-273.18-mRNA-1 | Japonica | NA       |               |              | OsR498G0511222600.01.T01 | Glandular trichome-specific WRKY 1                                               |
| maker-5-augustus-gene-273.20-mRNA-1 | Japonica | NA       |               |              | OsR498G0511223000.01.T01 | Flavin-containing monooxygenase                                                  |
| maker-5-augustus-gene-273.3-mRNA-1  | Japonica | NA       |               | Os05g0526400 | OsR498G0511217000.01.T02 |                                                                                  |
| maker-5-augustus-gene-273.7-mRNA-1  | Japonica | NA       |               | Os05g0527600 |                          | UDPGT domain-containing protein                                                  |
| maker-5-augustus-gene-28.0-mRNA-1   | Japonica | Indica   |               | Os05g0148900 | OsR498G0509736900.01.T05 | Glutathione transferase                                                          |
| maker-5-augustus-gene-28.10-mRNA-1  | Japonica | NA       |               |              | OsR498G0509739300.01.T01 | CAP10 domain-containing protein (Fragment)                                       |
| maker-5-augustus-gene-28.14-mRNA-1  | Japonica | NA       |               | Os05g0149800 | OsR498G0509740100.01.T01 | Serine/threonine-protein phosphatase 2A regulatory subunit B" subunit gamma      |
| maker-5-augustus-gene-28.2-mRNA-1   | Japonica | Indica   |               | Os05g0148900 | OsR498G0509736900.01.T01 | Glutathione transferase                                                          |
| maker-5-augustus-gene-28.20-mRNA-1  | Japonica | NA       |               |              | OsR498G0509740300.01.T05 | Anaphase-promoting complex subunit 7                                             |
| maker-5-augustus-gene-28.25-mRNA-1  | Japonica | NA       |               | Os05g0150300 | OsR498G0509741900.01.T02 | Chromatin-remodeling complex ATPase chain                                        |
| maker-5-augustus-gene-28.33-mRNA-1  | Japonica | NA       |               | Os05g0149600 | OsR498G0509739800.01.T01 | Cullin-1                                                                         |
| maker-5-augustus-gene-28.39-mRNA-1  | Japonica | Indica   |               | Os05g0150000 | OsR498G0509740600.01.T01 | Pyridoxal phosphate homeostasis protein                                          |
| maker-5-augustus-gene-28.44-mRNA-1  | Japonica | NA       |               | Os05g0150400 | OsR498G0509742200.01.T03 | Double-stranded RNA-binding protein 3                                            |
| maker-5-augustus-gene-28.46-mRNA-1  | Japonica | NA       |               |              | OsR498G0509742600.01.T05 | Transport inhibitor response 1                                                   |
| maker-5-augustus-gene-28.5-mRNA-1   | Japonica | Japonica |               | Os05g0149200 | OsR498G0509738100.01.T01 | PWWP domain-containing protein (Fragment)                                        |
| maker-5-augustus-gene-28.8-mRNA-1   | Japonica | NA       |               | Os05g0149400 | OsR498G0509738700.01.T01 | 1-aminocyclopropane-1-carboxylic acid oxidase                                    |
| maker-5-augustus-gene-282.58-mRNA-1 | Japonica | Japonica |               | Os05g0545900 | OsR498G0511285100.01.T01 |                                                                                  |
| maker-5-augustus-gene-282.70-mRNA-1 | Japonica | NA       |               |              | OsR498G0511285500.01.T01 |                                                                                  |
| maker-5-augustus-gene-282.74-mRNA-1 | Japonica | NA       |               | Os05g0547850 | OsR498G0511286400.01.T01 | Double-stranded DNA-binding family protein                                       |
| maker-5-augustus-gene-286.17-mRNA-1 | Japonica | NA       |               | Os05g0554500 | OsR498G0511313100.01.T02 | CDP-diacylglycerol--serine O-phosphatidyltransferase 2                           |
| maker-5-augustus-gene-289.40-mRNA-1 | Japonica | NA       |               | Os05g0559300 |                          | Elongation factor Ts isoform 1                                                   |
| maker-5-augustus-gene-289.46-mRNA-1 | Japonica | NA       |               | Os05g0559400 | OsR498G0511331000.01.T04 | Auxin-responsive protein IAA5                                                    |
| maker-5-augustus-gene-289.50-mRNA-1 | Japonica | NA       |               | Os05g0559900 | OsR498G0511332400.01.T05 | Golgin candidate 5                                                               |
| maker-5-augustus-gene-29.0-mRNA-1   | Japonica | NA       |               | Os05g0150700 | OsR498G0509743900.01.T01 | HMA domain-containing protein (Fragment)                                         |
| maker-5-augustus-gene-29.11-mRNA-1  | Japonica | NA       |               | Os05g0152400 | OsR498G0509750100.01.T02 | beta-glucuronosyltransferase GlcAT14A-like                                       |
| maker-5-augustus-gene-29.13-mRNA-1  | Japonica | NA       |               | Os05g0150600 |                          | ATP-dependent DNA helicase                                                       |
| maker-5-augustus-gene-29.18-mRNA-1  | Japonica | Indica   |               | Os05g0150900 | OsR498G0509745600.01.T01 | Histidine--tRNA ligase                                                           |
| maker-5-augustus-gene-29.24-mRNA-1  | Japonica | NA       |               | Os05g0151000 | OsR498G0509746000.01.T01 | DNA-directed RNA polymerase subunit                                              |
| maker-5-augustus-gene-29.30-mRNA-1  | Japonica | NA       |               | Os05g0151300 | OsR498G0509747400.01.T01 | Rubber elongation factor                                                         |
| maker-5-augustus-gene-29.32-mRNA-1  | Japonica | NA       |               | Os05g0151400 | OsR498G0509747600.01.T01 | Translocase of chloroplast 159 chloroplastic                                     |
| maker-5-augustus-gene-29.4-mRNA-1   | Japonica | Japonica |               | Os05g0150800 | OsR498G0509745300.01.T01 | Methenyltetrahydrofolate cyclohydrolase                                          |
| maker-5-augustus-gene-29.7-mRNA-1   | Japonica | NA       |               | Os05g0151100 |                          | Desiccation-related protein PCC13-62                                             |
| maker-5-augustus-gene-29.9-mRNA-1   | Japonica | NA       |               |              | OsR498G0101163300.01.T01 | RNA polymerase archaeal subunit P/eukaryotic subunit RPABC                       |
| maker-5-augustus-gene-294.76-mRNA-1 | Japonica | NA       |               |              | OsR498G0511370300.01.T01 | CTP synthase (glutamine hydrolyzing)                                             |
| maker-5-augustus-gene-297.59-mRNA-1 | Japonica | Indica   |               | Os05g0575400 | OsR498G0511388300.01.T02 | FBD domain-containing protein                                                    |
| maker-5-augustus-gene-299.26-mRNA-1 | Japonica | NA       |               | Os05g0579600 | OsR498G0511401000.01.T02 | SANT domain-containing protein                                                   |
| maker-5-augustus-gene-299.28-mRNA-1 | Japonica | Indica   |               | Os05g0579600 | OsR498G0511401400.01.T01 | Transcription factor RADIALIS                                                    |
| maker-5-augustus-gene-299.30-mRNA-1 | Japonica | NA       |               | Os05g0580000 | OsR498G0511403400.01.T04 | Glucose-1-phosphate adenyllyltransferase large subunit, chloroplastic/amyloplast |
| maker-5-augustus-gene-299.6-mRNA-1  | Japonica | Japonica |               | Os05g0579500 | OsR498G0511400500.01.T01 |                                                                                  |

|                                     |          |          |           |              |                          |                                                                            |
|-------------------------------------|----------|----------|-----------|--------------|--------------------------|----------------------------------------------------------------------------|
| maker-5-augustus-gene-299.8-mRNA-1  | Japonica | NA       |           | Os05g0579800 | OsR498G0511401700.01.T03 | Anaphase-promoting complex subunit 10                                      |
| maker-5-augustus-gene-3.24-mRNA-1   | Japonica | NA       |           | Os05g0106200 | OsR498G0509573300.01.T01 |                                                                            |
| maker-5-augustus-gene-30.0-mRNA-1   | Japonica | NA       |           | Os05g0153000 | OsR498G0509751300.01.T07 | HP domain-containing protein                                               |
| maker-5-augustus-gene-30.11-mRNA-1  | Japonica | NA       |           | Os05g0153300 | OsR498G0509752400.01.T01 | Triacylglycerol lipase-like 1                                              |
| maker-5-augustus-gene-30.15-mRNA-1  | Japonica | NA       |           | Os05g0153600 |                          | PH domain-containing protein (Fragment)                                    |
| maker-5-augustus-gene-30.4-mRNA-1   | Japonica | NA       |           |              |                          | UBC core domain-containing protein (Fragment)                              |
| maker-5-augustus-gene-30.9-mRNA-1   | Japonica | Japonica |           | Os05g0153800 | OsR498G0509696100.01.T04 | ABC transporter B family member 4                                          |
| maker-5-augustus-gene-300.30-mRNA-1 | Japonica | NA       |           | Os05g0580500 | OsR498G0511404300.01.T01 | Sister chromatid cohesion 1 protein 1                                      |
| maker-5-augustus-gene-300.37-mRNA-1 | Japonica | Japonica |           | Os05g0581100 | OsR498G0511373800.01.T01 | Rab3 GTPase-activating protein non-catalytic subunit                       |
| maker-5-augustus-gene-300.45-mRNA-1 | Japonica | NA       |           |              | OsR498G0511405400.01.T02 |                                                                            |
| maker-5-augustus-gene-300.47-mRNA-1 | Japonica | NA       |           |              | OsR498G0511406000.01.T01 |                                                                            |
| maker-5-augustus-gene-300.50-mRNA-1 | Japonica | NA       |           | Os05g0581900 | OsR498G0511408600.01.T03 | Carbohydrate-binding X8 domain superfamily protein, putative isoform 1     |
| maker-5-augustus-gene-300.52-mRNA-1 | Japonica | NA       |           | Os05g0582100 | OsR498G0511409600.01.T02 | Protein REDUCED WALL ACETYLATION 3                                         |
| maker-5-augustus-gene-301.0-mRNA-1  | Japonica | Indica   |           | Os12g0271700 | OsR498G0511410300.01.T01 | All-trans-nonaprenyl-diphosphate synthase                                  |
| maker-5-augustus-gene-301.16-mRNA-1 | Japonica | NA       |           |              | OsR498G0511411800.01.T01 | WRKY domain class transcription factor                                     |
| maker-5-augustus-gene-301.19-mRNA-1 | Japonica | NA       |           | Os05g0583900 | OsR498G0511415200.01.T01 | Pentatricopeptide repeat-containing protein                                |
| maker-5-augustus-gene-301.4-mRNA-1  | Japonica | Indica   | Kinase-TM | Os01g0629900 | OsR498G0511410500.01.T01 | Mitogen-activated protein kinase                                           |
| maker-5-augustus-gene-301.9-mRNA-1  | Japonica | NA       |           | Os05g0583500 | OsR498G0511413900.01.T01 | Phox-associated domain                                                     |
| maker-5-augustus-gene-302.0-mRNA-1  | Japonica | Indica   |           | Os05g0584900 | OsR498G0511420500.01.T02 | S-type anion channel SLAH2                                                 |
| maker-5-augustus-gene-302.14-mRNA-1 | Japonica | NA       | Kinase-TM | Os05g0585500 | OsR498G0511422000.01.T02 | Calcium-dependent protein kinase 1 isoform A                               |
| maker-5-augustus-gene-302.19-mRNA-1 | Japonica | Indica   |           | Os05g0585700 | OsR498G0511422400.01.T02 |                                                                            |
| maker-5-augustus-gene-302.2-mRNA-1  | Japonica | NA       |           | Os05g0585400 | OsR498G0511421500.01.T05 | Probable protein ABIL1                                                     |
| maker-5-augustus-gene-302.21-mRNA-1 | Japonica | NA       |           | Os05g0585900 | OsR498G0511423000.01.T02 | Mitochondrial adenine nucleotide transporter like                          |
| maker-5-augustus-gene-302.7-mRNA-1  | Japonica | NA       |           | Os05g0584600 | OsR498G0511418600.01.T02 | AAA domain-containing protein (Fragment)                                   |
| maker-5-augustus-gene-303.0-mRNA-1  | Japonica | NA       |           | Os05g0586200 | OsR498G0511425100.01.T02 | Jasmonic acid-amido synthetase JAR1                                        |
| maker-5-augustus-gene-303.12-mRNA-1 | Japonica | NA       |           |              |                          | Plastid transcriptionally active 14                                        |
| maker-5-augustus-gene-303.17-mRNA-1 | Japonica | NA       |           |              | OsR498G0511425600.01.T01 | Transcription factor FAMA like                                             |
| maker-5-augustus-gene-303.19-mRNA-1 | Japonica | NA       |           | Os05g0587000 | OsR498G0511427800.01.T01 | Pectin lyase-like superfamily protein (Fragment)                           |
| maker-5-augustus-gene-303.2-mRNA-1  | Japonica | NA       |           | Os05g0586400 | OsR498G0511425700.01.T01 | Extra-large G-protein-like                                                 |
| maker-5-augustus-gene-303.23-mRNA-1 | Japonica | NA       |           | Os05g0587100 | OsR498G0511428000.01.T01 | Protein-serine/threonine phosphatase                                       |
| maker-5-augustus-gene-303.27-mRNA-1 | Japonica | Indica   |           | Os05g0587300 | OsR498G0511428600.01.T01 | Inactive TPR repeat-containing thioredoxin TTL3                            |
| maker-5-augustus-gene-303.32-mRNA-1 | Japonica | NA       |           | Os05g0587400 | OsR498G0511430200.01.T03 |                                                                            |
| maker-5-augustus-gene-303.4-mRNA-1  | Japonica | NA       |           | Os05g0586500 | OsR498G0511426100.01.T01 | probable GABA transporter 2                                                |
| maker-5-augustus-gene-303.6-mRNA-1  | Japonica | NA       |           | Os05g0586600 | OsR498G0511426300.01.T02 | RNA polymerase sigma factor sigE like                                      |
| maker-5-augustus-gene-303.9-mRNA-1  | Japonica | Japonica |           | Os05g0586700 | OsR498G0511426500.01.T01 | RNA polymerase sigma factor sigE, chloroplastic/mitochondrial              |
| maker-5-augustus-gene-304.43-mRNA-1 | Japonica | NA       |           |              | OsR498G0511430900.01.T01 | CRC domain-containing protein                                              |
| maker-5-augustus-gene-304.45-mRNA-1 | Japonica | NA       |           | Os05g0589000 | OsR498G0511434300.01.T01 | Bifunctional dihydroflavonol 4-reductase/flavanone 4-reductase isoform 1   |
| maker-5-augustus-gene-304.51-mRNA-1 | Japonica | Indica   |           | Os05g0589200 | OsR498G0511434500.01.T06 | RNA polymerase sigma factor sigC like                                      |
| maker-5-augustus-gene-304.58-mRNA-1 | Japonica | NA       |           | Os05g0589600 | OsR498G0511435300.01.T01 | RGG repeats nuclear RNA binding protein A                                  |
| maker-5-augustus-gene-304.61-mRNA-1 | Japonica | NA       |           |              | OsR498G0511430400.01.T02 | IENR2 domain-containing protein (Fragment)                                 |
| maker-5-augustus-gene-304.65-mRNA-1 | Japonica | Indica   |           | Os05g0587700 | OsR498G0511430600.01.T02 | Protein trichome birefringence                                             |
| maker-5-augustus-gene-304.69-mRNA-1 | Japonica | Indica   |           | Os01g0612500 | OsR498G0511431200.01.T01 | Acyl-protein thioesterase 2                                                |
| maker-5-augustus-gene-304.73-mRNA-1 | Japonica | NA       |           | Os05g0588200 |                          | Protein PARTING DANCERS homolog                                            |
| maker-5-augustus-gene-304.75-mRNA-1 | Japonica | NA       |           | Os05g0588500 | OsR498G0511432600.01.T01 | Bidirectional sugar transporter SWEET                                      |
| maker-5-augustus-gene-304.77-mRNA-1 | Japonica | NA       |           |              |                          | Paired amphipathic helix protein Sin3                                      |
| maker-5-augustus-gene-304.83-mRNA-1 | Japonica | NA       |           | Os05g0588850 | OsR498G0511434000.01.T01 | Adenosinetriphosphatase                                                    |
| maker-5-augustus-gene-304.85-mRNA-1 | Japonica | Indica   |           | Os01g0605100 | OsR498G0511434200.01.T01 | Adenosinetriphosphatase                                                    |
| maker-5-augustus-gene-304.89-mRNA-1 | Japonica | NA       | Kinase-TM |              | OsR498G0511435600.01.T05 | Protein kinase protein with adenine nucleotide alpha hydrolase-like domain |
| maker-5-augustus-gene-305.39-mRNA-1 | Japonica | NA       |           | Os05g0590100 | OsR498G0511436300.01.T01 | Phosphatidylinositol 4-kinase type 2-beta                                  |
| maker-5-augustus-gene-305.41-mRNA-1 | Japonica | NA       |           |              |                          |                                                                            |
| maker-5-augustus-gene-305.43-mRNA-1 | Japonica | NA       |           | Os05g0591600 | OsR498G0511441300.01.T01 | Cytokinin riboside 5'-monophosphate phosphoribohydrolase LOG               |
| maker-5-augustus-gene-305.47-mRNA-1 | Japonica | NA       |           | Os05g0590300 | OsR498G0511436800.01.T01 | AB hydrolase-1 domain-containing protein                                   |
| maker-5-augustus-gene-306.0-mRNA-1  | Japonica | NA       |           |              | OsR498G0511443700.01.T01 | SHSP domain-containing protein                                             |
| maker-5-augustus-gene-306.13-mRNA-1 | Japonica | NA       |           | Os05g0592500 | OsR498G0511445300.01.T07 | Serine/threonine-protein phosphatase 6 regulatory subunit 2                |
| maker-5-augustus-gene-306.19-mRNA-1 | Japonica | NA       |           | Os05g0591900 | OsR498G0511443400.01.T04 | Hypersensitive-induced response protein 1                                  |
| maker-5-augustus-gene-306.2-mRNA-1  | Japonica | NA       |           | Os05g0592300 | OsR498G0511444700.01.T03 | Cysteine dioxygenase                                                       |
| maker-5-augustus-gene-306.22-mRNA-1 | Japonica | NA       |           | Os05g0592100 | OsR498G0511444000.01.T01 | ATP-dependent Clp protease proteolytic subunit                             |
| maker-5-augustus-gene-306.27-mRNA-1 | Japonica | NA       |           | Os05g0592600 | OsR498G0511445600.01.T02 | Translation initiation factor IF-2                                         |
| maker-5-augustus-gene-306.32-mRNA-1 | Japonica | NA       |           | Os05g0592800 | OsR498G0511446600.01.T01 | Protein-serine/threonine phosphatase                                       |
| maker-5-augustus-gene-306.36-mRNA-1 | Japonica | NA       |           | Os05g0593100 | OsR498G0511447000.01.T01 | V-type proton ATPase subunit C                                             |
| maker-5-augustus-gene-306.42-mRNA-1 | Japonica | NA       |           | Os05g0593200 | OsR498G0511447200.01.T01 | V-type proton ATPase subunit C                                             |

|                                     |          |          |        |              |                          |                                                                            |
|-------------------------------------|----------|----------|--------|--------------|--------------------------|----------------------------------------------------------------------------|
| maker-5-augustus-gene-306.44-mRNA-1 | Japonica | NA       |        |              |                          | Chromatin modification-related protein EAF1 A                              |
| maker-5-augustus-gene-306.51-mRNA-1 | Japonica | NA       |        |              |                          | Casein kinase I isoform delta-like                                         |
| maker-5-augustus-gene-306.8-mRNA-1  | Japonica | NA       |        | Os05g0592400 | OsR498G0511445100.01.T02 | DNA damage-binding protein 1                                               |
| maker-5-augustus-gene-31.16-mRNA-1  | Japonica | NA       |        |              |                          |                                                                            |
| maker-5-augustus-gene-31.23-mRNA-1  | Japonica | NA       |        | Os05g0154800 | OsR498G0509767300.01.T01 | U1 small nuclear ribonucleoprotein A/U2 small nuclear ribonucleoprotein B  |
| maker-5-augustus-gene-31.26-mRNA-1  | Japonica | NA       | LRR-TM | Os05g0154300 | OsR498G0509763000.01.T01 | Putative receptor protein kinase TMK1                                      |
| maker-5-augustus-gene-31.28-mRNA-1  | Japonica | NA       |        | Os05g0154500 | OsR498G0509766400.01.T01 | Gamma-tubulin complex component                                            |
| maker-5-augustus-gene-31.35-mRNA-1  | Japonica | NA       |        | Os05g0154900 | OsR498G0509767600.01.T01 | Mediator of RNA polymerase II transcription subunit like                   |
| maker-5-augustus-gene-32.0-mRNA-1   | Japonica | NA       |        | Os05g0155100 | OsR498G0509768100.01.T01 | 60S ribosomal protein l18                                                  |
| maker-5-augustus-gene-32.11-mRNA-1  | Japonica | NA       |        | Os05g0156200 | OsR498G0509772300.01.T01 | Pollen-specific LRR extensin-like protein                                  |
| maker-5-augustus-gene-32.20-mRNA-1  | Japonica | NA       |        | Os05g0155000 | OsR498G0509768000.01.T04 | 3-hydroxyacyl-CoA dehydrogenase                                            |
| maker-5-augustus-gene-32.26-mRNA-1  | Japonica | NA       |        | Os05g0155200 | OsR498G0509768400.01.T02 | Ethylene receptor                                                          |
| maker-5-augustus-gene-32.29-mRNA-1  | Japonica | NA       |        | Os05g0155500 | OsR498G0509769800.01.T01 | Importin subunit alpha                                                     |
| maker-5-augustus-gene-32.3-mRNA-1   | Japonica | NA       |        | Os05g0155300 | OsR498G0509768700.01.T01 | NifU-like protein 4 mitochondrial                                          |
| maker-5-augustus-gene-32.34-mRNA-1  | Japonica | NA       |        | Os05g0156300 | OsR498G0509772600.01.T02 | Protein disulfide-isomerase                                                |
| maker-5-augustus-gene-32.40-mRNA-1  | Japonica | NA       |        | Os05g0156600 | OsR498G0509773400.01.T02 | Tubulin gamma chain                                                        |
| maker-5-augustus-gene-32.7-mRNA-1   | Japonica | NA       |        | Os05g0155700 | OsR498G0509769900.01.T01 | Heparan-alpha-glucosaminide N-acetyltransferase isoform C                  |
| maker-5-augustus-gene-33.0-mRNA-1   | Japonica | Indica   |        | Os01g0337600 | OsR498G0509774100.01.T01 | SMK-1 domain-containing protein                                            |
| maker-5-augustus-gene-33.19-mRNA-1  | Japonica | NA       |        |              | OsR498G0509777500.01.T02 | SWIB domain-containing protein                                             |
| maker-5-augustus-gene-33.21-mRNA-1  | Japonica | Indica   |        | Os01g0337900 | OsR498G0509773600.01.T02 | Dihydrolipoyl dehydrogenase                                                |
| maker-5-augustus-gene-33.26-mRNA-1  | Japonica | NA       |        | Os05g0155900 | OsR498G0509774400.01.T01 | H(+)-exporting diphosphatase                                               |
| maker-5-augustus-gene-33.28-mRNA-1  | Japonica | NA       |        | Os05g0157200 | OsR498G0509774800.01.T01 | Usp domain-containing protein                                              |
| maker-5-augustus-gene-33.31-mRNA-1  | Japonica | NA       |        | Os05g0157300 | OsR498G0509775000.01.T02 | ABC transporter E family member 2 like (Fragment)                          |
| maker-5-augustus-gene-33.5-mRNA-1   | Japonica | NA       |        | Os05g0158200 | OsR498G0509780300.01.T01 |                                                                            |
| maker-5-augustus-gene-33.8-mRNA-1   | Japonica | Japonica |        | Os05g0157600 | OsR498G0509776500.01.T01 |                                                                            |
| maker-5-augustus-gene-34.22-mRNA-1  | Japonica | NA       |        | Os05g0158200 | OsR498G0509780300.01.T01 |                                                                            |
| maker-5-augustus-gene-34.28-mRNA-1  | Japonica | NA       |        | Os05g0158400 | OsR498G0509781100.01.T01 |                                                                            |
| maker-5-augustus-gene-34.33-mRNA-1  | Japonica | NA       |        | Os05g0158600 | OsR498G0509783500.01.T01 | Gibberellin 2-beta-dioxygenase 1                                           |
| maker-5-augustus-gene-34.35-mRNA-1  | Japonica | Japonica |        | Os05g0159000 | OsR498G0509784700.01.T01 | E3 ubiquitin-protein ligase UPL6                                           |
| maker-5-augustus-gene-34.41-mRNA-1  | Japonica | NA       |        | Os05g0159100 | OsR498G0509784900.01.T02 | Golgi apparatus membrane protein TVP23                                     |
| maker-5-augustus-gene-34.45-mRNA-1  | Japonica | NA       |        | Os05g0158500 | OsR498G0509781400.01.T02 | Carboxypeptidase                                                           |
| maker-5-augustus-gene-34.50-mRNA-1  | Japonica | NA       |        | Os05g0159200 | OsR498G0509785200.01.T01 | Putative lipolytic protein (Fragment)                                      |
| maker-5-augustus-gene-34.52-mRNA-1  | Japonica | NA       |        |              |                          | GDSL esterase/lipase                                                       |
| maker-5-augustus-gene-35.0-mRNA-1   | Japonica | Indica   |        | Os01g0328700 | OsR498G0509787700.01.T01 | Dihydrolipoyl dehydrogenase                                                |
| maker-5-augustus-gene-35.15-mRNA-1  | Japonica | NA       |        |              |                          |                                                                            |
| maker-5-augustus-gene-35.16-mRNA-1  | Japonica | NA       |        | Os05g0160600 | OsR498G0509791800.01.T01 |                                                                            |
| maker-5-augustus-gene-35.6-mRNA-1   | Japonica | NA       |        |              | OsR498G0509791800.01.T05 |                                                                            |
| maker-5-augustus-gene-35.8-mRNA-1   | Japonica | NA       |        | Os05g0160800 | OsR498G0509792300.01.T01 | DNA polymerase epsilon subunit B                                           |
| maker-5-augustus-gene-36.36-mRNA-1  | Japonica | NA       |        | Os05g0161200 | OsR498G0509792700.01.T01 | GTP diphosphokinase                                                        |
| maker-5-augustus-gene-36.39-mRNA-1  | Japonica | NA       |        | Os05g0161400 | OsR498G0509792900.01.T06 | GTP diphosphokinase                                                        |
| maker-5-augustus-gene-36.44-mRNA-1  | Japonica | NA       |        | Os05g0161500 | OsR498G0509793900.01.T01 | GTP diphosphokinase                                                        |
| maker-5-augustus-gene-36.48-mRNA-1  | Japonica | NA       |        |              | OsR498G0509797500.01.T01 | Arginyl-tRNA synthetase                                                    |
| maker-5-augustus-gene-36.63-mRNA-1  | Japonica | NA       |        | Os05g0162600 |                          | Arginine/serine-rich splicing factor                                       |
| maker-5-augustus-gene-36.69-mRNA-1  | Japonica | NA       |        | Os05g0163100 | OsR498G0509797800.01.T01 | PHD finger protein ALFIN-LIKE 2-like                                       |
| maker-5-augustus-gene-36.72-mRNA-1  | Japonica | NA       |        |              | OsR498G0509798200.01.T01 | Pre-mRNA-processing-splicing factor 8A                                     |
| maker-5-augustus-gene-37.12-mRNA-1  | Japonica | NA       |        | Os05g0163700 | OsR498G0509800400.01.T02 | Acyl-coenzyme A oxidase 4 peroxisomal                                      |
| maker-5-augustus-gene-37.18-mRNA-1  | Japonica | NA       |        |              | OsR498G0509803000.01.T01 | PDZ domain-containing protein                                              |
| maker-5-augustus-gene-37.20-mRNA-1  | Japonica | NA       |        |              | OsR498G0509803400.01.T01 | PDZ domain-containing protein                                              |
| maker-5-augustus-gene-37.22-mRNA-1  | Japonica | NA       |        | Os05g0164800 | OsR498G0509804000.01.T02 | Zinc transporter 6 chloroplastic                                           |
| maker-5-augustus-gene-37.24-mRNA-1  | Japonica | NA       |        | Os05g0164900 | OsR498G0509804600.01.T01 | DCD domain-containing protein (Fragment)                                   |
| maker-5-augustus-gene-37.3-mRNA-1   | Japonica | NA       |        | Os05g0164100 | OsR498G0509801900.01.T06 | 6-phosphofructo-2-kinase/fructose-26-bisphosphatase                        |
| maker-5-augustus-gene-37.9-mRNA-1   | Japonica | NA       |        | Os05g0163400 | OsR498G0509799000.01.T04 | E3 ubiquitin-protein ligase MBR1                                           |
| maker-5-augustus-gene-38.32-mRNA-1  | Japonica | Japonica |        | Os05g0165400 | OsR498G0509807300.01.T05 | Phosphatidylinositol N-acetylglucosaminyltransferase                       |
| maker-5-augustus-gene-38.35-mRNA-1  | Japonica | Japonica |        | Os05g0165450 | OsR498G0509807600.01.T01 | LOB domain-containing protein 13                                           |
| maker-5-augustus-gene-39.0-mRNA-1   | Japonica | NA       |        | Os05g0168400 | OsR498G0509820300.01.T01 | Putative NT domain of poly(A) polymerase and terminal uridylyl transferase |
| maker-5-augustus-gene-39.14-mRNA-1  | Japonica | NA       |        | Os05g0168300 | OsR498G0509820000.01.T02 | 5-amino-6-(5-phospho-D-ribitylamino)uracil phosphatase, chloroplastic      |
| maker-5-augustus-gene-39.20-mRNA-1  | Japonica | NA       |        | Os05g0168700 | OsR498G0509822000.01.T03 | TPT domain-containing protein                                              |
| maker-5-augustus-gene-39.26-mRNA-1  | Japonica | NA       |        | Os05g0169000 | OsR498G0509823000.01.T01 | Thioredoxin H-type like                                                    |
| maker-5-augustus-gene-39.3-mRNA-1   | Japonica | NA       |        | Os05g0169100 | OsR498G0509823300.01.T02 | 60S ribosomal protein L10                                                  |
| maker-5-augustus-gene-4.40-mRNA-1   | Japonica | Japonica |        | Os05g0107700 | OsR498G0102771100.01.T01 | Transcription initiation factor IIA subunit 2                              |
| maker-5-augustus-gene-4.44-mRNA-1   | Japonica | NA       |        | Os05g0107900 | OsR498G0509577900.01.T03 | Drought-induced 19                                                         |

|                                    |          |          |               |              |                          |                                                                              |
|------------------------------------|----------|----------|---------------|--------------|--------------------------|------------------------------------------------------------------------------|
| maker-5-augustus-gene-4.55-mRNA-1  | Japonica | Indica   |               | Os05g0106900 | OsR498G0509576000.01.T01 | F-box domain-containing protein                                              |
| maker-5-augustus-gene-4.58-mRNA-1  | Japonica | Indica   |               | Os05g0107000 | OsR498G0509576200.01.T01 | Pentatricopeptide repeat                                                     |
| maker-5-augustus-gene-4.60-mRNA-1  | Japonica | NA       |               | Os05g0107600 | OsR498G0509577000.01.T01 | ABC transporter D family member 1 like                                       |
| maker-5-augustus-gene-40.0-mRNA-1  | Japonica | Indica   | Kinase-LRR-TM | Os01g0170300 | OsR498G0509825300.01.T01 | Mitogen-activated protein kinase kinase                                      |
| maker-5-augustus-gene-40.11-mRNA-1 | Japonica | NA       |               | Os05g0171300 | OsR498G0509832300.01.T01 | Adenine nucleotide transporter BT1 chloroplastic/mitochondrial               |
| maker-5-augustus-gene-41.9-mRNA-1  | Japonica | NA       |               |              | OsR498G0509838800.01.T01 |                                                                              |
| maker-5-augustus-gene-45.16-mRNA-1 | Japonica | NA       |               | Os05g0176100 | OsR498G0509847200.01.T01 | Cellulose synthase                                                           |
| maker-5-augustus-gene-45.9-mRNA-1  | Japonica | Japonica |               | Os05g0177000 | OsR498G0509849900.01.T01 | F-box domain-containing protein (Fragment)                                   |
| maker-5-augustus-gene-46.40-mRNA-1 | Japonica | Japonica |               | Os05g0178000 | OsR498G0509852900.01.T01 | NPH3 domain-containing protein (Fragment)                                    |
| maker-5-augustus-gene-46.42-mRNA-1 | Japonica | NA       |               |              | OsR498G0509856500.01.T01 | Pre-mRNA-splicing factor 38                                                  |
| maker-5-augustus-gene-46.47-mRNA-1 | Japonica | NA       |               | Os05g0178100 | OsR498G0509853400.01.T01 | GA 3beta-hydroxylase                                                         |
| maker-5-augustus-gene-46.49-mRNA-1 | Japonica | NA       |               | Os05g0178600 | OsR498G0509854200.01.T01 | Auxin-responsive protein (Fragment)                                          |
| maker-5-augustus-gene-47.29-mRNA-1 | Japonica | NA       |               | Os05g0179800 | OsR498G0509864300.01.T03 | nuclear ubiquitous casein and cyclin-dependent kinase substrate 1-like isofo |
| maker-5-augustus-gene-47.32-mRNA-1 | Japonica | NA       |               | Os05g0179300 | OsR498G0509860600.01.T01 | 3'-N-debenzoyl-2'-deoxytaxol N-benzoyltransferase                            |
| maker-5-augustus-gene-47.34-mRNA-1 | Japonica | NA       |               |              |                          |                                                                              |
| maker-5-augustus-gene-47.36-mRNA-1 | Japonica | Japonica |               | Os05g0179900 | OsR498G0509865400.01.T01 | Glycosyltransferase                                                          |
| maker-5-augustus-gene-48.0-mRNA-1  | Japonica | NA       |               | Os05g0181000 | OsR498G0509868500.01.T01 | Heat shock protein 4                                                         |
| maker-5-augustus-gene-48.15-mRNA-1 | Japonica | Indica   |               | Os01g0183633 | OsR498G0509869000.01.T01 | Ribosomal protein L18ae family                                               |
| maker-5-augustus-gene-48.3-mRNA-1  | Japonica | NA       |               | Os05g0180400 | OsR498G0509867000.01.T01 | MAR-binding filament-like protein 1                                          |
| maker-5-augustus-gene-48.6-mRNA-1  | Japonica | Indica   |               | Os05g0180500 | OsR498G0509867200.01.T02 | FLZ-type domain-containing protein (Fragment)                                |
| maker-5-augustus-gene-48.9-mRNA-1  | Japonica | NA       |               | Os05g0180600 | OsR498G0509867800.01.T06 | Phosphatidylinositol 3-kinase                                                |
| maker-5-augustus-gene-49.0-mRNA-1  | Japonica | NA       |               | Os05g0182500 | OsR498G0509872900.01.T03 | Ubiquitin-fold modifier-conjugating enzyme                                   |
| maker-5-augustus-gene-49.13-mRNA-1 | Japonica | NA       |               | Os05g0182100 | OsR498G0509872400.01.T02 | Protein SLOW GREEN 1 chloroplastic                                           |
| maker-5-augustus-gene-49.16-mRNA-1 | Japonica | NA       |               |              | OsR498G0509872600.01.T01 | Hypoxanthine phosphoribosyltransferase                                       |
| maker-5-augustus-gene-5.49-mRNA-1  | Japonica | Indica   |               | Os07g0573600 | OsR498G0509580700.01.T01 | Nucleotide excision repair, TFIIH, subunit TTDA                              |
| maker-5-augustus-gene-5.50-mRNA-1  | Japonica | NA       |               | Os05g0108600 | OsR498G0509580900.01.T01 | Xylem cysteine proteinase 1                                                  |
| maker-5-augustus-gene-5.52-mRNA-1  | Japonica | NA       |               | Os05g0108800 | OsR498G0509581100.01.T01 | Cytochrome b5 heme-binding domain-containing protein                         |
| maker-5-augustus-gene-5.55-mRNA-1  | Japonica | NA       |               | Os09g0120100 | OsR498G0916711900.01.T01 |                                                                              |
| maker-5-augustus-gene-5.58-mRNA-1  | Japonica | NA       |               | Os05g0110300 | OsR498G0509585100.01.T03 | Putative 3-beta hydroxysteroid dehydrogenase/isomerase protein               |
| maker-5-augustus-gene-5.61-mRNA-1  | Japonica | NA       |               | Os05g0108000 | OsR498G0509578200.01.T02 | H/ACA ribonucleoprotein complex subunit 4                                    |
| maker-5-augustus-gene-5.65-mRNA-1  | Japonica | NA       |               | Os05g0108100 | OsR498G0509578400.01.T02 | Lysine ketoglutarate reductase trans-splicing related 1                      |
| maker-5-augustus-gene-5.70-mRNA-1  | Japonica | NA       |               |              |                          | Mutator-like transposase                                                     |
| maker-5-augustus-gene-5.74-mRNA-1  | Japonica | Indica   |               | Os01g0971900 | OsR498G0509582000.01.T02 | Pumilio 2 like                                                               |
| maker-5-augustus-gene-53.11-mRNA-1 | Japonica | NA       |               | Os05g0187600 |                          | Aspartic proteinase nepenthesin-1                                            |
| maker-5-augustus-gene-53.20-mRNA-1 | Japonica | NA       |               |              | OsR498G0509900800.01.T01 | Derlin                                                                       |
| maker-5-augustus-gene-54.37-mRNA-1 | Japonica | NA       |               | Os05g0188500 | OsR498G0509902300.01.T01 | SCD domain-containing protein (Fragment)                                     |
| maker-5-augustus-gene-54.45-mRNA-1 | Japonica | NA       |               | Os05g0188600 | OsR498G0509903100.01.T01 | Nodulin homeobox                                                             |
| maker-5-augustus-gene-54.53-mRNA-1 | Japonica | NA       |               | Os05g0188800 | OsR498G0509903500.01.T02 | Ubiquinone biosynthesis protein COQ4 homolog, mitochondrial                  |
| maker-5-augustus-gene-54.56-mRNA-1 | Japonica | Japonica |               | Os05g0188900 | OsR498G0509907200.01.T01 | Stem 28 kDa glycoprotein (Fragment)                                          |
| maker-5-augustus-gene-56.9-mRNA-1  | Japonica | NA       |               |              | OsR498G0509916000.01.T03 | Cullin, N-terminal                                                           |
| maker-5-augustus-gene-6.0-mRNA-1   | Japonica | NA       |               | Os05g0110500 | OsR498G0509585700.01.T01 | DEAD-box ATP-dependent RNA helicase                                          |
| maker-5-augustus-gene-6.15-mRNA-1  | Japonica | NA       |               |              | OsR498G0509589100.01.T02 | Metallothionein-like protein 2C                                              |
| maker-5-augustus-gene-6.18-mRNA-1  | Japonica | NA       |               |              | OsR498G0509589700.01.T01 | Pyruvate dehydrogenase phosphatase                                           |
| maker-5-augustus-gene-6.20-mRNA-1  | Japonica | Indica   |               | Os01g0974500 | OsR498G0509591700.01.T03 | Pectin acetylsterase                                                         |
| maker-5-augustus-gene-6.26-mRNA-1  | Japonica | NA       |               | Os05g0110600 | OsR498G0509586000.01.T01 | Rab5-interacting protein family                                              |
| maker-5-augustus-gene-6.28-mRNA-1  | Japonica | NA       |               | Os05g0110700 | OsR498G0509586200.01.T01 | Kinetochore protein spc25                                                    |
| maker-5-augustus-gene-6.35-mRNA-1  | Japonica | NA       |               | Os05g0111100 | OsR498G0509588400.01.T02 | Mitochondrial import inner membrane translocase subunit TIM9                 |
| maker-5-augustus-gene-6.37-mRNA-1  | Japonica | NA       |               | Os05g0112000 | OsR498G0509592000.01.T01 | E3 ubiquitin-protein ligase XB3                                              |
| maker-5-augustus-gene-6.4-mRNA-1   | Japonica | Indica   |               | Os05g0110800 | OsR498G0509586500.01.T01 | PGR5-like protein 1A, chloroplastic                                          |
| maker-5-augustus-gene-6.41-mRNA-1  | Japonica | Indica   |               | Os05g0112200 | OsR498G0509593800.01.T01 | Dof zinc finger protein 5                                                    |
| maker-5-augustus-gene-6.8-mRNA-1   | Japonica | NA       |               | Os05g0111000 | OsR498G0509588100.01.T01 | Replication protein A subunit                                                |
| maker-5-augustus-gene-67.23-mRNA-1 | Japonica | NA       |               | Os05g0209400 | OsR498G0509996500.01.T01 | NUDIX hydrolase domain                                                       |
| maker-5-augustus-gene-67.25-mRNA-1 | Japonica | NA       |               | Os05g0209500 | OsR498G0509996700.01.T01 | Transmembrane protein, putative                                              |
| maker-5-augustus-gene-67.27-mRNA-1 | Japonica | NA       |               | Os05g0209600 | OsR498G0509997700.01.T01 | GDSL esterase/lipase                                                         |
| maker-5-augustus-gene-67.34-mRNA-1 | Japonica | NA       |               | Os05g0209100 | OsR498G0509995400.01.T01 | alpha-1,2-Mannosidase                                                        |
| maker-5-augustus-gene-68.1-mRNA-1  | Japonica | NA       |               | Os05g0210100 | OsR498G0509999700.01.T02 | GDSL esterase/lipase                                                         |
| maker-5-augustus-gene-68.10-mRNA-1 | Japonica | Japonica |               | Os05g0210500 | OsR498G0510001000.01.T02 | TIMELESS domain-containing protein                                           |
| maker-5-augustus-gene-68.14-mRNA-1 | Japonica | NA       |               | Os05g0211100 | OsR498G0510002400.01.T01 | Obtusifolii 14-alpha demethylase                                             |
| maker-5-augustus-gene-68.3-mRNA-1  | Japonica | NA       |               | Os05g0210400 | OsR498G0510000700.01.T01 | GdsI esterelipase                                                            |
| maker-5-augustus-gene-68.5-mRNA-1  | Japonica | Indica   |               | Os05g0210600 | OsR498G0510001300.01.T02 | TPR repeat-containing thioredoxin TTL1                                       |
| maker-5-augustus-gene-69.29-mRNA-1 | Japonica | Japonica |               | Os05g0212200 | OsR498G0510003400.01.T04 | Brassinosteroid LRR receptor kinase                                          |

|                                    |          |          |               |              |                          |                                                                  |
|------------------------------------|----------|----------|---------------|--------------|--------------------------|------------------------------------------------------------------|
| maker-5-augustus-gene-69.32-mRNA-1 | Japonica | NA       |               | Os05g0212300 | OsR498G0510004600.01.T01 | Endoglucanase                                                    |
| maker-5-augustus-gene-69.34-mRNA-1 | Japonica | NA       |               | Os05g0212400 | OsR498G0510005600.01.T05 | Putative helicase with zinc finger domain                        |
| maker-5-augustus-gene-69.39-mRNA-1 | Japonica | NA       |               |              |                          | Replication protein A DNA-binding subunit B                      |
| maker-5-augustus-gene-69.42-mRNA-1 | Japonica | NA       |               | Os05g0212900 | OsR498G0510009000.01.T01 | Putative chalcone synthase                                       |
| maker-5-augustus-gene-69.44-mRNA-1 | Japonica | Indica   |               | Os05g0212900 | OsR498G0510010200.01.T01 | Putative chalcone synthase                                       |
| maker-5-augustus-gene-7.43-mRNA-1  | Japonica | Indica   |               | Os05g0113000 | OsR498G0509597100.01.T01 | ACT domain-containing protein ACR9                               |
| maker-5-augustus-gene-7.46-mRNA-1  | Japonica | NA       |               | Os05g0113300 | OsR498G0509597500.01.T01 | Cation/H(+) antiporter like                                      |
| maker-5-augustus-gene-7.48-mRNA-1  | Japonica | NA       |               | Os05g0113400 | OsR498G0509597700.01.T01 | Actin-depolymerizing factor 7                                    |
| maker-5-augustus-gene-7.50-mRNA-1  | Japonica | NA       |               | Os05g0113500 | OsR498G0509598000.01.T02 | BRI1-KD interacting protein 130                                  |
| maker-5-augustus-gene-7.52-mRNA-1  | Japonica | NA       |               | Os05g0114000 | OsR498G0509597400.01.T02 | Inorganic diphosphatase                                          |
| maker-5-augustus-gene-73.33-mRNA-1 | Japonica | NA       |               |              |                          | HAT-like transposase                                             |
| maker-5-augustus-gene-78.37-mRNA-1 | Japonica | NA       |               |              | OsR498G0510073600.01.T02 | BHLH domain-containing protein                                   |
| maker-5-augustus-gene-8.0-mRNA-1   | Japonica | NA       |               |              | OsR498G0509600700.01.T01 | Tyrosine sulfotransferase-like protein                           |
| maker-5-augustus-gene-8.14-mRNA-1  | Japonica | NA       |               |              | OsR498G0509598400.01.T01 | Type I inositol polyphosphate 5-phosphatase                      |
| maker-5-augustus-gene-8.16-mRNA-1  | Japonica | NA       |               | Os05g0114500 | OsR498G0509600600.01.T01 | 28 kDa ribonucleoprotein, chloroplastic                          |
| maker-5-augustus-gene-8.3-mRNA-1   | Japonica | NA       |               |              | OsR498G0509601700.01.T01 | Myb-related protein MYBAS2                                       |
| maker-5-augustus-gene-8.5-mRNA-1   | Japonica | NA       |               | Os05g0115100 | OsR498G0509604700.01.T01 | probable basic-leucine zipper transcription factor R             |
| maker-5-augustus-gene-8.7-mRNA-1   | Japonica | Japonica |               | Os05g0115600 | OsR498G0509605500.01.T01 | DUF569 domain-containing protein                                 |
| maker-5-augustus-gene-8.9-mRNA-1   | Japonica | NA       |               | Os05g0115700 | OsR498G0509605700.01.T01 | UDP-galactose/UDP-glucose transporter 5                          |
| maker-5-augustus-gene-80.0-mRNA-1  | Japonica | NA       |               | Os05g0230600 | OsR498G0510081500.01.T01 | ER membrane protein complex subunit 1                            |
| maker-5-augustus-gene-80.11-mRNA-1 | Japonica | NA       |               | Os05g0232200 | OsR498G0510087900.01.T04 |                                                                  |
| maker-5-augustus-gene-80.16-mRNA-1 | Japonica | Indica   |               | Os05g0230900 | OsR498G0510083800.01.T01 | Glyoxalase I                                                     |
| maker-5-augustus-gene-80.21-mRNA-1 | Japonica | NA       | Kinase-TM     |              | OsR498G0510084400.01.T01 | Glyoxalase I                                                     |
| maker-5-augustus-gene-80.23-mRNA-1 | Japonica | NA       |               | Os05g0231900 | OsR498G0510087000.01.T01 | Peroxidase                                                       |
| maker-5-augustus-gene-80.6-mRNA-1  | Japonica | Indica   |               | Os01g0231000 | OsR498G0510083100.01.T03 | Auxin-responsive protein (Fragment)                              |
| maker-5-augustus-gene-80.9-mRNA-1  | Japonica | NA       |               | Os05g0231700 | OsR498G0510086700.01.T02 | Aquaporin TIP4-1                                                 |
| maker-5-augustus-gene-81.0-mRNA-1  | Japonica | NA       |               | Os05g0232500 | OsR498G0510088700.01.T01 | Putative ubiquitin-onjugating enzyme E2                          |
| maker-5-augustus-gene-81.10-mRNA-1 | Japonica | NA       |               | Os01g0722550 |                          | HAT dimerization domain-containing protein / transposase-related |
| maker-5-augustus-gene-81.4-mRNA-1  | Japonica | NA       |               |              | OsR498G0510091900.01.T02 | WRKY domain-containing protein (Fragment)                        |
| maker-5-augustus-gene-81.6-mRNA-1  | Japonica | NA       |               |              | OsR498G0612347800.01.T01 | DUF223 domain-containing protein                                 |
| maker-5-augustus-gene-82.0-mRNA-1  | Japonica | NA       |               | Os05g0234700 |                          | TTF-type zinc finger protein with HAT dimerization domain        |
| maker-5-augustus-gene-82.3-mRNA-1  | Japonica | NA       |               |              |                          | Transposon protein, putative, CACTA, En/Spm sub-class            |
| maker-5-augustus-gene-82.6-mRNA-1  | Japonica | NA       |               | Os05g0233900 |                          | HAT family dimerisation domain containing protein, expressed     |
| maker-5-augustus-gene-83.15-mRNA-1 | Japonica | NA       |               | Os05g0235300 | OsR498G0510103900.01.T10 | Non-specific serine/threonine protein kinase                     |
| maker-5-augustus-gene-83.26-mRNA-1 | Japonica | NA       |               |              |                          | Nucleosome assembly protein 1                                    |
| maker-5-augustus-gene-83.29-mRNA-1 | Japonica | NA       |               | Os05g0235800 | OsR498G0510105500.01.T01 | DNA helicase                                                     |
| maker-5-augustus-gene-84.38-mRNA-1 | Japonica | Indica   |               | Os05g0237100 | OsR498G0510107300.01.T04 | Cyclin N-terminal domain-containing protein (Fragment)           |
| maker-5-augustus-gene-84.44-mRNA-1 | Japonica | NA       | Kinase-TM     | Os05g0237400 | OsR498G0510107900.01.T01 | Serine/threonine-protein kinase D6PKL1                           |
| maker-5-augustus-gene-84.46-mRNA-1 | Japonica | NA       |               | Os05g0237200 |                          | Cytochrome b561 and DOMON domain-containing protein isoform B    |
| maker-5-augustus-gene-84.48-mRNA-1 | Japonica | NA       |               |              | OsR498G0510107600.01.T01 | Cytochrome b561 and DOMON domain-containing protein              |
| maker-5-augustus-gene-84.55-mRNA-1 | Japonica | Japonica |               | Os05g0237700 | OsR498G0612375300.01.T06 | Terpene cyclase/mutase family member                             |
| maker-5-augustus-gene-85.0-mRNA-1  | Japonica | NA       |               | Os05g0238200 | OsR498G0510111700.01.T02 | RING-type E3 ubiquitin transferase                               |
| maker-5-augustus-gene-85.11-mRNA-1 | Japonica | Indica   |               | Os08g0127100 | OsR498G0510111400.01.T01 | Lysine histidine transporter like                                |
| maker-5-augustus-gene-85.13-mRNA-1 | Japonica | NA       |               |              | OsR498G0510118600.01.T01 | Retrotransposon protein, putative, Ty3-gypsy subclass            |
| maker-5-augustus-gene-85.3-mRNA-1  | Japonica | NA       |               |              | OsR498G0510115900.01.T01 |                                                                  |
| maker-5-augustus-gene-85.5-mRNA-1  | Japonica | NA       |               |              | OsR498G0510117300.01.T01 |                                                                  |
| maker-5-augustus-gene-85.8-mRNA-1  | Japonica | NA       |               |              | OsR498G0510118100.01.T06 |                                                                  |
| maker-5-augustus-gene-86.0-mRNA-1  | Japonica | NA       |               | Os05g0241200 | OsR498G0510124100.01.T01 | Triose phosphate/phosphate translocator TPT chloroplastic        |
| maker-5-augustus-gene-86.11-mRNA-1 | Japonica | NA       |               | Os05g0241000 | OsR498G0510123000.01.T02 | WPP domain-interacting tail-anchored protein 1                   |
| maker-5-augustus-gene-86.13-mRNA-1 | Japonica | NA       |               | Os05g0241400 | OsR498G0510125200.01.T02 | Profilin                                                         |
| maker-5-augustus-gene-86.6-mRNA-1  | Japonica | NA       | NBS-TM        | Os05g0240200 | OsR498G0510120000.01.T03 | TOPLLESS-related 1 isoform 2                                     |
| maker-5-augustus-gene-87.2-mRNA-1  | Japonica | NA       |               | Os05g0243300 | OsR498G0510127200.01.T04 | Large subunit ribosomal protein L13                              |
| maker-5-augustus-gene-87.4-mRNA-1  | Japonica | NA       |               |              | OsR498G0510127600.01.T02 | Large subunit ribosomal protein L13                              |
| maker-5-augustus-gene-87.7-mRNA-1  | Japonica | Indica   |               | Os05g0243300 | OsR498G0510127600.01.T02 | Ribosomal protein L13                                            |
| maker-5-augustus-gene-88.0-mRNA-1  | Japonica | NA       |               | Os05g0244500 | OsR498G0510128200.01.T02 | Mannan endo-1,4-beta-mannosidase                                 |
| maker-5-augustus-gene-88.1-mRNA-1  | Japonica | NA       |               | Os05g0244500 | OsR498G0510128200.01.T04 | Mannan endo-1,4-beta-mannosidase                                 |
| maker-5-augustus-gene-88.10-mRNA-1 | Japonica | NA       |               | Os05g0244700 | OsR498G0510128800.01.T01 | D-amino-acid transaminase, chloroplastic isoform X1              |
| maker-5-augustus-gene-88.8-mRNA-1  | Japonica | Japonica |               | Os05g0244600 | OsR498G0510128400.01.T01 | OB-fold nucleic acid binding domain containing protein           |
| maker-5-augustus-gene-89.0-mRNA-1  | Japonica | NA       | Kinase-LRR-TM |              |                          | Putative leucine-rich repeat receptor-like protein kinase        |
| maker-5-augustus-gene-89.4-mRNA-1  | Japonica | NA       |               | Os05g0245300 | OsR498G0510129800.01.T01 |                                                                  |
| maker-5-augustus-gene-89.6-mRNA-1  | Japonica | NA       |               | Os05g0246300 | OsR498G0510131000.01.T01 | Expansin-B2 like                                                 |



|                                     |          |          |               |              |                          |                                                                        |
|-------------------------------------|----------|----------|---------------|--------------|--------------------------|------------------------------------------------------------------------|
| maker-5-augustus-gene-9.42-mRNA-1   | Japonica | NA       |               |              | OsR498G0509609100.01.T01 | Phosphatidylinositol N-acetylglucosaminyltransferase subunit P-related |
| maker-5-augustus-gene-9.45-mRNA-1   | Japonica | NA       |               | Os05g0117500 | OsR498G0509610300.01.T01 | NUDIX hydrolase domain                                                 |
| maker-5-augustus-gene-9.51-mRNA-1   | Japonica | NA       |               | Os05g0117600 | OsR498G0509610500.01.T01 | E3 UFM1-protein ligase 1 like                                          |
| maker-5-augustus-gene-9.57-mRNA-1   | Japonica | NA       |               | Os05g0117798 | OsR498G0509611500.01.T02 | Kinesin-like protein KIN-5A                                            |
| maker-5-augustus-gene-9.64-mRNA-1   | Japonica | NA       |               | Os05g0115900 | OsR498G0509606200.01.T04 | Beta-N-acetylhexosaminidase                                            |
| maker-5-augustus-gene-9.70-mRNA-1   | Japonica | NA       |               | Os05g0116000 | OsR498G0509606600.01.T01 | Glutelin type-D-1                                                      |
| maker-5-augustus-gene-9.72-mRNA-1   | Japonica | Indica   |               | Os05g0116100 | OsR498G0509606800.01.T01 | Dehydroascorbate reductase                                             |
| maker-5-augustus-gene-9.76-mRNA-1   | Japonica | Indica   |               | Os05g0116500 | OsR498G0509608800.01.T01 |                                                                        |
| maker-5-augustus-gene-9.78-mRNA-1   | Japonica | Indica   |               | Os05g0117864 | OsR498G0509611800.01.T02 | Nuclear factor                                                         |
| maker-5-augustus-gene-90.0-mRNA-1   | Japonica | NA       |               | Os05g0247800 | OsR498G0510138100.01.T01 | Xylanase inhibitor protein XIP                                         |
| maker-5-augustus-gene-90.1-mRNA-1   | Japonica | NA       |               | Os05g0248300 |                          |                                                                        |
| maker-5-augustus-gene-90.3-mRNA-1   | Japonica | NA       |               | Os05g0247900 | OsR498G0510138800.01.T02 | Switch 2                                                               |
| maker-5-augustus-gene-91.0-mRNA-1   | Japonica | NA       |               |              |                          | CCHC-type domain-containing protein                                    |
| maker-5-augustus-gene-91.1-mRNA-1   | Japonica | Indica   |               | Os05g0250101 | OsR498G0510143400.01.T01 | DUF1618 domain-containing protein (Fragment)                           |
| maker-5-augustus-gene-91.2-mRNA-1   | Japonica | Japonica |               | Os05g0249100 | OsR498G0510145600.01.T01 |                                                                        |
| maker-5-augustus-gene-92.37-mRNA-1  | Japonica | NA       |               | Os11g0704000 | OsR498G1120768100.01.T01 | selenoprotein H                                                        |
| maker-5-augustus-gene-92.40-mRNA-1  | Japonica | NA       |               | Os05g0251400 | OsR498G0510151900.01.T01 |                                                                        |
| maker-5-augustus-gene-92.43-mRNA-1  | Japonica | NA       |               | Os05g0250101 |                          | DUF1618 domain-containing protein (Fragment)                           |
| maker-5-augustus-gene-92.46-mRNA-1  | Japonica | Indica   |               | Os05g0251300 | OsR498G0510147800.01.T01 | DUF1618 domain-containing protein (Fragment)                           |
| maker-5-augustus-gene-92.48-mRNA-1  | Japonica | NA       |               | Os05g0251300 | OsR498G0510151800.01.T01 | DUF1618 domain-containing protein (Fragment)                           |
| maker-5-augustus-gene-92.50-mRNA-1  | Japonica | NA       |               | Os05g0250700 |                          | NB-ARC domain, putative                                                |
| maker-5-augustus-gene-92.53-mRNA-1  | Japonica | Japonica |               | Os05g0251300 | OsR498G0510151800.01.T01 | DUF1618 domain-containing protein (Fragment)                           |
| maker-5-augustus-gene-93.0-mRNA-1   | Japonica | NA       |               | Os12g0468900 | OsR498G0713579700.01.T01 | Cell wall protein-like                                                 |
| maker-5-augustus-gene-93.2-mRNA-1   | Japonica | NA       |               | Os05g0251900 | OsR498G0510154600.01.T01 | Putative metal-nicotianamine transporter YSL3                          |
| maker-5-augustus-gene-93.5-mRNA-1   | Japonica | NA       |               | Os05g0252000 | OsR498G0510155000.01.T01 | Putative metal-nicotianamine transporter YSL3                          |
| maker-5-augustus-gene-93.7-mRNA-1   | Japonica | NA       |               | Os05g0252100 | OsR498G0510155400.01.T01 | Lipase, putative, expressed                                            |
| maker-5-augustus-gene-93.9-mRNA-1   | Japonica | NA       |               |              |                          | Transposon protein, putative, CACTA, En/Spm sub-class, expressed       |
| maker-5-augustus-gene-94.42-mRNA-1  | Japonica | Indica   |               | Os05g0257100 | OsR498G0510160500.01.T03 | Non-specific serine/threonine protein kinase                           |
| maker-5-augustus-gene-94.45-mRNA-1  | Japonica | Indica   | Kinase-LRR-TM | Os04g0291900 | OsR498G0510160500.01.T05 | Non-specific serine/threonine protein kinase                           |
| maker-5-augustus-gene-95.0-mRNA-1   | Japonica | NA       |               | Os05g0255600 | OsR498G0510164300.01.T01 | Thioredoxin domain-containing protein 9                                |
| maker-5-augustus-gene-95.16-mRNA-1  | Japonica | NA       | Kinase-LRR-TM | Os04g0291900 | OsR498G0510174900.01.T02 | Non-specific serine/threonine protein kinase                           |
| maker-5-augustus-gene-95.6-mRNA-1   | Japonica | NA       |               |              | OsR498G0510164700.01.T03 | HAT transposon superfamily isoform 2                                   |
| maker-5-augustus-gene-95.9-mRNA-1   | Japonica | NA       |               | Os05g0256000 | OsR498G0510166100.01.T02 | Eukaryotic translation initiation factor 3 subunit I                   |
| maker-5-augustus-gene-96.0-mRNA-1   | Japonica | NA       |               | Os11g0500100 |                          | HAT dimerization domain-containing protein / transposase-related       |
| maker-5-augustus-gene-96.10-mRNA-1  | Japonica | Indica   | Kinase-LRR-TM | Os05g0257100 | OsR498G0510172500.01.T03 | Non-specific serine/threonine protein kinase                           |
| maker-5-augustus-gene-96.3-mRNA-1   | Japonica | Indica   | LRR-TM        | Os05g0257100 | OsR498G0510169700.01.T01 | Non-specific serine/threonine protein kinase                           |
| maker-5-augustus-gene-96.6-mRNA-1   | Japonica | Indica   | Kinase-TM     | Os08g0203400 | OsR498G0510169900.01.T02 | Non-specific serine/threonine protein kinase                           |
| maker-6-augustus-gene-1.33-mRNA-1   | Japonica | NA       |               |              |                          | Acyl-CoA N-acyltransferase with RING/FYVE/PHD-type zinc finger domain  |
| maker-6-augustus-gene-1.37-mRNA-1   | Japonica | NA       |               |              | OsR498G0611466700.01.T06 | Acyl-CoA N-acyltransferase with RING/FYVE/PHD-type zinc finger domain  |
| maker-6-augustus-gene-1.41-mRNA-1   | Japonica | NA       |               | Os06g0101100 | OsR498G0611466900.01.T01 | Protein N-lysine methyltransferase METTL21A isoform A                  |
| maker-6-augustus-gene-1.43-mRNA-1   | Japonica | Indica   |               | Os06g0101800 | OsR498G0611468800.01.T01 | NAC transcription factor                                               |
| maker-6-augustus-gene-100.4-mRNA-1  | Japonica | NA       |               |              | OsR498G0612153800.01.T01 | PGG domain-containing protein (Fragment)                               |
| maker-6-augustus-gene-100.6-mRNA-1  | Japonica | Indica   |               | Os06g0286146 | OsR498G0612154200.01.T01 | PGG domain-containing protein (Fragment)                               |
| maker-6-augustus-gene-102.41-mRNA-1 | Japonica | NA       | CC-NBS-TM     |              |                          | NBS-LRR                                                                |
| maker-6-augustus-gene-102.42-mRNA-1 | Japonica | NA       | NBS-TM        |              |                          | Disease resistance protein RPM1                                        |
| maker-6-augustus-gene-102.49-mRNA-1 | Japonica | NA       | NBS-TM        |              | OsR498G0612165900.01.T03 | Disease resistance protein RPM1                                        |
| maker-6-augustus-gene-104.0-mRNA-1  | Japonica | NA       |               |              | OsR498G0612170100.01.T02 | Usp domain-containing protein (Fragment)                               |
| maker-6-augustus-gene-104.4-mRNA-1  | Japonica | Indica   |               | Os06g0293100 | OsR498G0612174700.01.T01 | PGG domain-containing protein                                          |
| maker-6-augustus-gene-104.6-mRNA-1  | Japonica | NA       | Kinase-TM     | Os06g0291600 | OsR498G0612170400.01.T02 | serine/threonine-protein kinase D6PK                                   |
| maker-6-augustus-gene-104.8-mRNA-1  | Japonica | NA       |               | Os06g0291800 |                          | Embryogenesis transmembrane protein                                    |
| maker-6-augustus-gene-105.11-mRNA-1 | Japonica | NA       |               | Os06g0294600 | OsR498G0612180200.01.T01 | Cytochrome P450 family protein, expressed                              |
| maker-6-augustus-gene-105.5-mRNA-1  | Japonica | Japonica |               | Os06g0293500 | OsR498G0612176400.01.T01 |                                                                        |
| maker-6-augustus-gene-105.7-mRNA-1  | Japonica | Japonica |               | Os06g0294000 | OsR498G0612178800.01.T02 |                                                                        |
| maker-6-augustus-gene-105.9-mRNA-1  | Japonica | NA       |               | Os06g0294300 | OsR498G0612179200.01.T01 | Putative NBS-LRR type R protein (Pi2 R gene)                           |
| maker-6-augustus-gene-106.0-mRNA-1  | Japonica | NA       |               |              | OsR498G0612180900.01.T01 | F-box domain-containing protein                                        |
| maker-6-augustus-gene-106.10-mRNA-1 | Japonica | Japonica |               | Os06g0296500 | OsR498G1222153000.01.T01 | Zeamatin                                                               |
| maker-6-augustus-gene-106.13-mRNA-1 | Japonica | Indica   |               | Os06g0294200 | OsR498G0612180400.01.T01 | Embryogenesis transmembrane protein-like                               |
| maker-6-augustus-gene-106.15-mRNA-1 | Japonica | Japonica |               | Os06g0295500 | OsR498G0612183000.01.T01 |                                                                        |
| maker-6-augustus-gene-106.17-mRNA-1 | Japonica | Indica   |               | Os06g0296200 | OsR498G0612185200.01.T02 |                                                                        |
| maker-6-augustus-gene-106.19-mRNA-1 | Japonica | Japonica |               | Os06g0296700 | OsR498G0612185600.01.T01 | Embryogenesis transmembrane protein-like                               |
| maker-6-augustus-gene-106.3-mRNA-1  | Japonica | NA       |               |              | OsR498G0612183500.01.T01 | Embryogenesis transmembrane protein-like                               |

|                                     |          |          |  |              |                          |                                                                          |
|-------------------------------------|----------|----------|--|--------------|--------------------------|--------------------------------------------------------------------------|
| maker-6-augustus-gene-106.6-mRNA-1  | Japonica | NA       |  |              |                          |                                                                          |
| maker-6-augustus-gene-106.8-mRNA-1  | Japonica | NA       |  |              |                          | Embryogenesis transmembrane protein-like                                 |
| maker-6-augustus-gene-107.0-mRNA-1  | Japonica | NA       |  | Os06g0297700 | OsR498G0612190700.01.T02 | Transmembrane protein 245                                                |
| maker-6-augustus-gene-107.13-mRNA-1 | Japonica | NA       |  |              |                          | Mitotic checkpoint serine/threonine-protein kinase BUB1                  |
| maker-6-augustus-gene-107.2-mRNA-1  | Japonica | NA       |  | Os06g0297800 | OsR498G0612190900.01.T05 | C2 calcium-dependent membrane targeting                                  |
| maker-6-augustus-gene-107.7-mRNA-1  | Japonica | Indica   |  | Os02g0724500 | OsR498G0612189800.01.T01 | TPT domain-containing protein (Fragment)                                 |
| maker-6-augustus-gene-108.40-mRNA-1 | Japonica | Japonica |  | Os06g0298300 | OsR498G0100204400.01.T01 | Pentatricopeptide repeat-containing protein                              |
| maker-6-augustus-gene-108.42-mRNA-1 | Japonica | Indica   |  | Os06g0298400 | OsR498G0612192700.01.T02 | WW domain-containing protein                                             |
| maker-6-augustus-gene-108.48-mRNA-1 | Japonica | NA       |  | Os06g0298200 | OsR498G0612192000.01.T01 | Zinc finger protein CONSTANS-LIKE 9                                      |
| maker-6-augustus-gene-108.54-mRNA-1 | Japonica | NA       |  | Os06g0298500 | OsR498G0612193200.01.T02 | Protein translocase subunit SecA like                                    |
| maker-6-augustus-gene-108.58-mRNA-1 | Japonica | NA       |  | Os06g0299100 | OsR498G0612194600.01.T01 | Hydroxysteroid dehydrogenase-like protein 1                              |
| maker-6-augustus-gene-108.60-mRNA-1 | Japonica | Japonica |  | Os06g0299200 | OsR498G0612197200.01.T01 | Putative b-keto acyl reductase                                           |
| maker-6-augustus-gene-108.62-mRNA-1 | Japonica | NA       |  | Os06g0299300 | OsR498G0612197200.01.T01 | Very-long-chain 3-oxoacyl-CoA reductase 1-like                           |
| maker-6-augustus-gene-109.36-mRNA-1 | Japonica | NA       |  |              | OsR498G0612202900.01.T01 | WD40, G-beta domain containing family protein, family                    |
| maker-6-augustus-gene-109.45-mRNA-1 | Japonica | NA       |  | Os06g0300000 | OsR498G0612200000.01.T01 | Putative steroid dehydrogenase 4                                         |
| maker-6-augustus-gene-109.46-mRNA-1 | Japonica | Indica   |  | Os06g0300000 | OsR498G0612200600.01.T01 | Putative b-keto acyl reductase                                           |
| maker-6-augustus-gene-109.53-mRNA-1 | Japonica | NA       |  | Os06g0300300 | OsR498G0612201000.01.T01 | Vesicle transport protein (Fragment)                                     |
| maker-6-augustus-gene-109.55-mRNA-1 | Japonica | Indica   |  | Os06g0300500 | OsR498G0612202000.01.T01 | Steroid nuclear receptor ligand-binding                                  |
| maker-6-augustus-gene-109.60-mRNA-1 | Japonica | NA       |  | Os06g0300600 | OsR498G0612202200.01.T01 | Ribosomal protein L46                                                    |
| maker-6-augustus-gene-109.63-mRNA-1 | Japonica | NA       |  | Os06g0301000 | OsR498G0612204600.01.T01 | E3 ubiquitin-protein ligase synoviolin                                   |
| maker-6-augustus-gene-109.67-mRNA-1 | Japonica | Indica   |  | Os04g0470300 | OsR498G0612204800.01.T02 | Protein FATTY ACID EXPORT 1 chloroplastic                                |
| maker-6-augustus-gene-110.30-mRNA-1 | Japonica | NA       |  | Os06g0301300 | OsR498G0612205500.01.T05 | Proteasome activator subunit 4                                           |
| maker-6-augustus-gene-110.40-mRNA-1 | Japonica | Japonica |  | Os06g0303200 | OsR498G0612210100.01.T01 | BURP domain-containing protein                                           |
| maker-6-augustus-gene-110.42-mRNA-1 | Japonica | NA       |  | Os06g0301400 | OsR498G0612205800.01.T01 |                                                                          |
| maker-6-augustus-gene-111.0-mRNA-1  | Japonica | Japonica |  | Os06g0303400 | OsR498G0815345200.01.T05 | Aconitate hydratase                                                      |
| maker-6-augustus-gene-112.49-mRNA-1 | Japonica | Indica   |  | Os06g0303800 | OsR498G0612215900.01.T01 | GPI-anchored protein LLG2                                                |
| maker-6-augustus-gene-112.53-mRNA-1 | Japonica | NA       |  | Os06g0304500 | OsR498G0612217900.01.T05 | Putative crm domain-containing protein, chloroplastic                    |
| maker-6-augustus-gene-113.0-mRNA-1  | Japonica | NA       |  |              |                          | Peptidase A1 domain-containing protein (Fragment)                        |
| maker-6-augustus-gene-113.1-mRNA-1  | Japonica | Indica   |  | Os06g0306300 | OsR498G0612221100.01.T01 | Peroxidase                                                               |
| maker-6-augustus-gene-114.35-mRNA-1 | Japonica | NA       |  | Os06g0308000 | OsR498G0612226900.01.T01 | Peptidylprolyl isomerase                                                 |
| maker-6-augustus-gene-114.41-mRNA-1 | Japonica | Japonica |  | Os06g0308200 | OsR498G0612227900.01.T02 | Ribosomal protein L15                                                    |
| maker-6-augustus-gene-114.45-mRNA-1 | Japonica | NA       |  | Os06g0308800 | OsR498G0612229300.01.T01 | LYST-interacting protein 5-like protein                                  |
| maker-6-augustus-gene-114.49-mRNA-1 | Japonica | NA       |  | Os06g0307900 | OsR498G0612226600.01.T03 |                                                                          |
| maker-6-augustus-gene-114.53-mRNA-1 | Japonica | NA       |  | Os06g0308100 | OsR498G0612227400.01.T02 | Protein-tyrosine-phosphatase IBR5                                        |
| maker-6-augustus-gene-114.57-mRNA-1 | Japonica | NA       |  | Os06g0308300 | OsR498G0612228200.01.T01 | 65-kDa microtubule-associated protein 1                                  |
| maker-6-augustus-gene-114.63-mRNA-1 | Japonica | NA       |  | Os06g0309000 | OsR498G0612230200.01.T03 | Putative RING zinc finger domain superfamily protein isoform 1           |
| maker-6-augustus-gene-114.67-mRNA-1 | Japonica | NA       |  |              | OsR498G0612230200.01.T04 | BPI2 domain-containing protein                                           |
| maker-6-augustus-gene-115.9-mRNA-1  | Japonica | NA       |  |              | OsR498G0612243600.01.T01 | Protein O-linked-mannose beta-1,4-N-acetylglucosaminyltransferase 2-like |
| maker-6-augustus-gene-116.0-mRNA-1  | Japonica | NA       |  | Os06g0311300 | OsR498G0612244900.01.T02 | RING-type E3 ubiquitin transferase                                       |
| maker-6-augustus-gene-116.4-mRNA-1  | Japonica | NA       |  |              |                          | Mannan endo-1,4-beta-mannosidase                                         |
| maker-6-augustus-gene-116.6-mRNA-1  | Japonica | NA       |  |              | OsR498G0612246200.01.T01 | Anthranilate O-methyltransferase 1                                       |
| maker-6-augustus-gene-117.31-mRNA-1 | Japonica | NA       |  |              | OsR498G0612252400.01.T01 | Anthranilate O-methyltransferase 1                                       |
| maker-6-augustus-gene-117.33-mRNA-1 | Japonica | NA       |  | Os06g0313440 | OsR498G0612253000.01.T03 | Jasmonate o-methyltransferase                                            |
| maker-6-augustus-gene-117.34-mRNA-1 | Japonica | Indica   |  | Os06g0313440 | OsR498G0612253000.01.T03 | Salicylate O-methyltransferase                                           |
| maker-6-augustus-gene-117.39-mRNA-1 | Japonica | NA       |  |              |                          |                                                                          |
| maker-6-augustus-gene-118.23-mRNA-1 | Japonica | Indica   |  | Os06g0313900 | OsR498G0612257800.01.T01 | Myosin heavy chain-like                                                  |
| maker-6-augustus-gene-118.25-mRNA-1 | Japonica | NA       |  | Os06g0314600 | OsR498G0612260200.01.T02 | Salicylate O-methyltransferase                                           |
| maker-6-augustus-gene-118.28-mRNA-1 | Japonica | NA       |  | Os06g0315000 | OsR498G0612261200.01.T01 | Jasmonate O-methyltransferase                                            |
| maker-6-augustus-gene-118.31-mRNA-1 | Japonica | Indica   |  | Os06g0315000 | OsR498G0612262400.01.T01 | Salicylate O-methyltransferase                                           |
| maker-6-augustus-gene-119.0-mRNA-1  | Japonica | NA       |  | Os07g0642600 | OsR498G0714844000.01.T03 | TFIIS N-terminal domain-containing protein                               |
| maker-6-augustus-gene-119.3-mRNA-1  | Japonica | NA       |  | Os06g0316000 |                          |                                                                          |
| maker-6-augustus-gene-119.5-mRNA-1  | Japonica | NA       |  | Os06g0316100 | OsR498G0612263300.01.T01 | Adhesin FhaB                                                             |
| maker-6-augustus-gene-119.7-mRNA-1  | Japonica | NA       |  | Os06g0316300 | OsR498G0612264100.01.T01 | Pericardin                                                               |
| maker-6-augustus-gene-120.0-mRNA-1  | Japonica | Indica   |  | Os06g0316800 | OsR498G0612266700.01.T01 |                                                                          |
| maker-6-augustus-gene-120.12-mRNA-1 | Japonica | Japonica |  | Os06g0316800 | OsR498G0612264800.01.T01 | Keratin 9                                                                |
| maker-6-augustus-gene-120.14-mRNA-1 | Japonica | NA       |  | Os06g0318300 | OsR498G0612270800.01.T01 | RHO protein GDP dissociation inhibitor                                   |
| maker-6-augustus-gene-120.2-mRNA-1  | Japonica | NA       |  | Os06g0317400 | OsR498G0612268100.01.T01 | ctenidin-1 isoform X2                                                    |
| maker-6-augustus-gene-120.9-mRNA-1  | Japonica | Indica   |  | Os06g0318500 | OsR498G0612271500.01.T01 | Sodium/hydrogen exchanger                                                |
| maker-6-augustus-gene-121.0-mRNA-1  | Japonica | Indica   |  | Os06g0318600 | OsR498G0612271900.01.T02 | Carboxyl-terminal-processing peptidase 3, chloroplastic                  |
| maker-6-augustus-gene-121.14-mRNA-1 | Japonica | NA       |  | Os06g0319700 | OsR498G0612274100.01.T01 | 60S ribosomal protein L31                                                |
| maker-6-augustus-gene-121.17-mRNA-1 | Japonica | NA       |  | Os06g0320100 | OsR498G0612275100.01.T03 | CDK5 regulatory subunit associated protein 3                             |

|                                     |          |          |               |              |                          |                                                                        |
|-------------------------------------|----------|----------|---------------|--------------|--------------------------|------------------------------------------------------------------------|
| maker-6-augustus-gene-121.19-mRNA-1 | Japonica | NA       |               | Os06g0320000 | OsR498G0612275000.01.T01 | DUF953 domain-containing protein                                       |
| maker-6-augustus-gene-121.21-mRNA-1 | Japonica | NA       |               |              | OsR498G0612275400.01.T01 | Non-cyanogenic beta-glucosidase isoform B                              |
| maker-6-augustus-gene-121.5-mRNA-1  | Japonica | NA       |               | Os06g0318700 | OsR498G0612272100.01.T02 | E3 ubiquitin-protein ligase makorin                                    |
| maker-6-augustus-gene-121.8-mRNA-1  | Japonica | NA       |               | Os06g0319600 | OsR498G0612273700.01.T05 | Polynucleotide adenyllyltransferase                                    |
| maker-6-augustus-gene-122.26-mRNA-1 | Japonica | NA       |               | Os06g0320500 | OsR498G0612275900.01.T01 | Chlorophyll a-b binding protein, chloroplastic                         |
| maker-6-augustus-gene-122.29-mRNA-1 | Japonica | NA       |               | Os06g0320700 | OsR498G0612276200.01.T01 | Selenoprotein O                                                        |
| maker-6-augustus-gene-122.32-mRNA-1 | Japonica | NA       |               |              | OsR498G0612276400.01.T04 | zf-RVT domain-containing protein                                       |
| maker-6-augustus-gene-123.24-mRNA-1 | Japonica | Japonica |               | Os06g0322500 | OsR498G0612281500.01.T01 | Indole-3-acetate O-methyltransferase 1                                 |
| maker-6-augustus-gene-123.26-mRNA-1 | Japonica | Japonica |               | Os06g0323100 | OsR498G0409452300.01.T01 | Indole-3-acetate O-methyltransferase                                   |
| maker-6-augustus-gene-124.34-mRNA-1 | Japonica | Indica   |               | Os06g0325200 | OsR498G0612284500.01.T01 | Inorganic phosphate transporter 1-9                                    |
| maker-6-augustus-gene-124.36-mRNA-1 | Japonica | NA       |               | Os06g0325500 | OsR498G0612286700.01.T04 | DUF89 domain-containing protein                                        |
| maker-6-augustus-gene-124.42-mRNA-1 | Japonica | Indica   |               | Os06g0324400 | OsR498G0612283600.01.T01 | Late embryogenesis abundant                                            |
| maker-6-augustus-gene-124.44-mRNA-1 | Japonica | NA       |               | Os06g0325200 | OsR498G0612285800.01.T01 | Phosphate transporter                                                  |
| maker-6-augustus-gene-125.24-mRNA-1 | Japonica | NA       |               | Os06g0326400 | OsR498G0612293700.01.T01 | Pyrophosphate--fructose 6-phosphate 1-phosphotransferase subunit alpha |
| maker-6-augustus-gene-125.30-mRNA-1 | Japonica | NA       |               | Os06g0326500 | OsR498G0612294100.01.T01 | Mitochondrial glycoprotein-like                                        |
| maker-6-augustus-gene-125.32-mRNA-1 | Japonica | NA       |               |              | OsR498G0612294900.01.T01 | Acytransferase                                                         |
| maker-6-augustus-gene-125.37-mRNA-1 | Japonica | NA       |               | Os06g0326000 | OsR498G0612291200.01.T01 | AT-hook motif nuclear-localized protein (Fragment)                     |
| maker-6-augustus-gene-126.30-mRNA-1 | Japonica | Indica   | Kinase-TM     | Os06g0328400 | OsR498G0612301900.01.T02 | Lectin receptor kinase 1                                               |
| maker-6-augustus-gene-126.32-mRNA-1 | Japonica | Indica   |               | Os06g0327300 | OsR498G0612297400.01.T01 | Thioredoxin reductase NTRA                                             |
| maker-6-augustus-gene-126.34-mRNA-1 | Japonica | NA       |               |              | OsR498G0612298000.01.T01 |                                                                        |
| maker-6-augustus-gene-127.0-mRNA-1  | Japonica | NA       |               | Os06g0328800 | OsR498G0612303700.01.T02 | Glycosyltransferase family 92 protein (Fragment)                       |
| maker-6-augustus-gene-127.2-mRNA-1  | Japonica | Indica   |               | Os06g0329900 | OsR498G0612308100.01.T04 | Caffeine synthase 1                                                    |
| maker-6-augustus-gene-127.7-mRNA-1  | Japonica | NA       |               |              |                          | DNA binding protein-like                                               |
| maker-6-augustus-gene-128.0-mRNA-1  | Japonica | NA       | NBS-TM PID3   | Os06g0330100 |                          | Resistance protein (Fragment)                                          |
| maker-6-augustus-gene-128.2-mRNA-1  | Japonica | Japonica |               | Os06g0330400 | OsR498G0612310000.01.T01 | Aldehyde oxygenase (deformylating)                                     |
| maker-6-augustus-gene-128.4-mRNA-1  | Japonica | NA       |               |              | OsR498G0612580400.01.T04 | WD repeat-containing protein 7                                         |
| maker-6-augustus-gene-129.0-mRNA-1  | Japonica | NA       |               | Os06g0332400 | OsR498G0612560000.01.T01 | Putative VHS/GAT domain containing family protein                      |
| maker-6-augustus-gene-129.11-mRNA-1 | Japonica | NA       |               | Os06g0332700 | OsR498G0612559300.01.T02 | CRC domain-containing protein                                          |
| maker-6-augustus-gene-129.17-mRNA-1 | Japonica | NA       |               | Os06g0332900 | OsR498G0612558500.01.T03 | RanBP2-type domain-containing protein (Fragment)                       |
| maker-6-augustus-gene-129.6-mRNA-1  | Japonica | NA       |               | Os06g0332600 | OsR498G0612559600.01.T02 |                                                                        |
| maker-6-augustus-gene-129.9-mRNA-1  | Japonica | Indica   |               | Os06g0332500 | OsR498G0612559700.01.T02 | Ubiquitin carrier protein E2 21 isoform 1                              |
| maker-6-augustus-gene-130.0-mRNA-1  | Japonica | NA       | Kinase-TM     | Os06g0334300 | OsR498G0612553000.01.T02 | Receptor-like protein kinase HERK 1 isoform A                          |
| maker-6-augustus-gene-130.2-mRNA-1  | Japonica | NA       | Kinase        | Os06g0334400 | OsR498G0612552700.01.T02 | Cyclin-dependent kinase                                                |
| maker-6-augustus-gene-131.0-mRNA-1  | Japonica | NA       |               | Os06g0335500 | OsR498G0612550400.01.T01 | Auxin-responsive protein (Fragment)                                    |
| maker-6-augustus-gene-131.4-mRNA-1  | Japonica | NA       |               | Os06g0335900 | OsR498G0612548600.01.T01 | Xyloglucan endotransglucosylase/hydrolase                              |
| maker-6-augustus-gene-131.6-mRNA-1  | Japonica | Indica   |               | Os06g0336200 | OsR498G0612546600.01.T01 | Delta tonoplast intrinsic protein 2                                    |
| maker-6-augustus-gene-132.0-mRNA-1  | Japonica | NA       |               | Os06g0338200 | OsR498G0612542400.01.T01 | Amine oxidase                                                          |
| maker-6-augustus-gene-132.2-mRNA-1  | Japonica | NA       |               | Os06g0338700 |                          | Amine oxidase                                                          |
| maker-6-augustus-gene-132.5-mRNA-1  | Japonica | NA       | Kinase-LRR-TM |              | OsR498G0612537000.01.T03 | GPCR kinase                                                            |
| maker-6-augustus-gene-132.7-mRNA-1  | Japonica | NA       |               | Os06g0338900 | OsR498G0612539300.01.T01 | Translation initiation factor eIF-2B subunit gamma like                |
| maker-6-augustus-gene-133.0-mRNA-1  | Japonica | NA       |               | Os06g0341300 | OsR498G0612530800.01.T01 | Late embryogenesis abundant protein like                               |
| maker-6-augustus-gene-133.2-mRNA-1  | Japonica | NA       |               | Os06g0341500 | OsR498G0612530600.01.T01 | AAI domain-containing protein (Fragment)                               |
| maker-6-augustus-gene-133.4-mRNA-1  | Japonica | NA       |               | Os06g0340200 | OsR498G0612534900.01.T02 | RING-CH-type domain-containing protein (Fragment)                      |
| maker-6-augustus-gene-133.7-mRNA-1  | Japonica | Indica   |               | Os02g0290500 | OsR498G0612533500.01.T06 | Phosphatidylinositol 4-kinase type 2-beta                              |
| maker-6-augustus-gene-133.9-mRNA-1  | Japonica | Japonica |               | Os06g0341600 | OsR498G0612529700.01.T01 |                                                                        |
| maker-6-augustus-gene-134.28-mRNA-1 | Japonica | NA       |               |              | OsR498G0612529400.01.T01 | Calmodulin-binding protein-like                                        |
| maker-6-augustus-gene-134.30-mRNA-1 | Japonica | NA       |               |              | OsR498G0612525600.01.T02 | tRNA-uridine aminocarboxypropyltransferase                             |
| maker-6-augustus-gene-134.34-mRNA-1 | Japonica | NA       |               | Os06g0342100 | OsR498G0612527300.01.T02 | signal recognition particle 19 kDa protein-like                        |
| maker-6-augustus-gene-135.25-mRNA-1 | Japonica | NA       |               | Os06g0344900 | OsR498G0612521200.01.T01 | CUP-SHAPED COTYLEDON 2                                                 |
| maker-6-augustus-gene-135.27-mRNA-1 | Japonica | NA       |               | Os06g0345200 | OsR498G0612517200.01.T03 | Nicotianamine aminotransferase B                                       |
| maker-6-augustus-gene-135.33-mRNA-1 | Japonica | NA       |               |              | OsR498G0612523500.01.T01 | RIX1 domain-containing protein                                         |
| maker-6-augustus-gene-135.35-mRNA-1 | Japonica | NA       |               |              |                          | RIX1 domain-containing protein                                         |
| maker-6-augustus-gene-136.0-mRNA-1  | Japonica | Indica   |               | Os06g0347100 | OsR498G0612514800.01.T01 | Acyl-coenzyme A oxidase 4 peroxisomal                                  |
| maker-6-augustus-gene-136.3-mRNA-1  | Japonica | NA       |               | Os01g0563500 |                          |                                                                        |
| maker-6-augustus-gene-136.5-mRNA-1  | Japonica | NA       |               |              |                          | Flavin-containing monooxygenase                                        |
| maker-6-augustus-gene-137.25-mRNA-1 | Japonica | NA       |               | Os06g0347100 | OsR498G0612514800.01.T01 | Acyl-coenzyme A oxidase 4 peroxisomal                                  |
| maker-6-augustus-gene-137.27-mRNA-1 | Japonica | NA       |               |              | OsR498G0612513600.01.T01 |                                                                        |
| maker-6-augustus-gene-137.29-mRNA-1 | Japonica | NA       |               |              |                          | MADS-box transcription factor                                          |
| maker-6-augustus-gene-137.31-mRNA-1 | Japonica | NA       |               |              | OsR498G0612512000.01.T01 | Agamous-like MADS-box protein AGL16                                    |
| maker-6-augustus-gene-138.29-mRNA-1 | Japonica | Indica   |               | Os06g0348800 | OsR498G0612507400.01.T01 | Transcription activator like                                           |
| maker-6-augustus-gene-139.37-mRNA-1 | Japonica | Japonica |               | Os06g0349700 | OsR498G0612505100.01.T01 | Coniferaldehyde 5-hydroxylase                                          |

|                                     |          |          |              |              |                          |                                                                            |
|-------------------------------------|----------|----------|--------------|--------------|--------------------------|----------------------------------------------------------------------------|
| maker-6-augustus-gene-140.0-mRNA-1  | Japonica | NA       |              | Os06g0351500 | OsR498G0612499400.01.T01 | GD5L esterase/lipase EXL1                                                  |
| maker-6-augustus-gene-140.2-mRNA-1  | Japonica | NA       |              | Os06g0351700 | OsR498G0612498400.01.T01 | GD5L esterase/lipase EXL1                                                  |
| maker-6-augustus-gene-141.22-mRNA-1 | Japonica | NA       |              |              | OsR498G0612491500.01.T01 | Histone mRNA exonuclease 1                                                 |
| maker-6-augustus-gene-142.42-mRNA-1 | Japonica | NA       |              | Os06g0354500 | OsR498G0612489500.01.T01 | Acyl-coenzyme A oxidase                                                    |
| maker-6-augustus-gene-142.43-mRNA-1 | Japonica | NA       |              | Os06g0354500 | OsR498G0612489500.01.T03 | Acyl-coenzyme A oxidase                                                    |
| maker-6-augustus-gene-143.0-mRNA-1  | Japonica | NA       |              | Os08g0109100 | OsR498G0815049100.01.T08 | Phosphoinositide phosphatase                                               |
| maker-6-augustus-gene-143.10-mRNA-1 | Japonica | NA       |              |              | OsR498G0612483700.01.T01 | NOP5NT domain-containing protein                                           |
| maker-6-augustus-gene-143.2-mRNA-1  | Japonica | Indica   |              | Os08g0109400 | OsR498G0612482600.01.T01 | Auxin-responsive protein (Fragment)                                        |
| maker-6-augustus-gene-143.7-mRNA-1  | Japonica | NA       |              | Os08g0109500 | OsR498G0612482400.01.T04 | Bromodomain-containing factor 2                                            |
| maker-6-augustus-gene-145.0-mRNA-1  | Japonica | NA       |              | Os06g0358800 | OsR498G0612466400.01.T01 | Ribonuclease III domain                                                    |
| maker-6-augustus-gene-145.2-mRNA-1  | Japonica | NA       |              | Os06g0359400 | OsR498G0612464700.01.T04 | Large subunit ribosomal protein L18Ae                                      |
| maker-6-augustus-gene-146.31-mRNA-1 | Japonica | NA       |              | Os06g0360300 | OsR498G0612461900.01.T02 | 3-beta hydroxysteroid dehydrogenase/isomerase                              |
| maker-6-augustus-gene-146.34-mRNA-1 | Japonica | NA       |              |              | OsR498G0612461700.01.T02 |                                                                            |
| maker-6-augustus-gene-151.0-mRNA-1  | Japonica | NA       |              | Os06g0367100 | OsR498G0612442200.01.T07 | 1,4-alpha-glucan-branching enzyme 3, chloroplastic/amyloplastic            |
| maker-6-augustus-gene-151.8-mRNA-1  | Japonica | Indica   |              | Os06g0367500 | OsR498G0612440300.01.T06 | Endoplasmic reticulum transmembrane protein (Fragment)                     |
| maker-6-augustus-gene-152.10-mRNA-1 | Japonica | NA       | Kinase-TM    | Os06g0367900 | OsR498G0612439300.01.T06 | Mitogen-activated protein kinase                                           |
| maker-6-augustus-gene-155.35-mRNA-1 | Japonica | NA       |              | Os06g0470150 | OsR498G0612426800.01.T01 | Putative glycosyltransferase AGO61                                         |
| maker-6-augustus-gene-155.39-mRNA-1 | Japonica | NA       |              | Os06g0470800 | OsR498G0612424200.01.T05 | embryonic stem cell-specific 5-hydroxymethylcytosine-binding protein isofo |
| maker-6-augustus-gene-156.22-mRNA-1 | Japonica | NA       |              | Os06g0471100 | OsR498G0612423400.01.T03 | Embryonic stem cell-specific 5-hydroxymethylcytosine-binding protein       |
| maker-6-augustus-gene-156.25-mRNA-1 | Japonica | NA       |              | Os06g0472200 | OsR498G0612388400.01.T01 | Phenylcoumaran benzylic ether reductase Betv6                              |
| maker-6-augustus-gene-156.28-mRNA-1 | Japonica | NA       |              | Os06g0472400 | OsR498G0612388000.01.T02 | Putative aldolase-type TIM barrel, pyruvate/Phosphoenolpyruvate kinase-lik |
| maker-6-augustus-gene-156.31-mRNA-1 | Japonica | NA       |              | Os06g0472000 | OsR498G0612389500.01.T02 | Peptide-methionine (R)-S-oxide reductase                                   |
| maker-6-augustus-gene-156.34-mRNA-1 | Japonica | Japonica |              | Os06g0472600 | OsR498G0612396400.01.T02 |                                                                            |
| maker-6-augustus-gene-157.33-mRNA-1 | Japonica | NA       |              | Os06g0472900 | OsR498G0612399500.01.T01 | Peroxidase                                                                 |
| maker-6-augustus-gene-157.35-mRNA-1 | Japonica | NA       |              | Os02g0805600 | OsR498G0204968900.01.T01 | Quinone oxidoreductase                                                     |
| maker-6-augustus-gene-157.37-mRNA-1 | Japonica | NA       |              |              | OsR498G0612399800.01.T01 |                                                                            |
| maker-6-augustus-gene-157.45-mRNA-1 | Japonica | Indica   | Kinase-TM    | Os06g0473200 | OsR498G0612401000.01.T06 | Mitogen-activated protein kinase kinase 3                                  |
| maker-6-augustus-gene-158.23-mRNA-1 | Japonica | NA       |              |              | OsR498G0612404800.01.T02 | FKBP12-interacting protein of 37 kDa                                       |
| maker-6-augustus-gene-158.29-mRNA-1 | Japonica | NA       |              | Os06g0474500 | OsR498G0612406400.01.T01 | DUF239 domain-containing protein/DUF4409 domain-containing protein         |
| maker-6-augustus-gene-158.32-mRNA-1 | Japonica | Indica   |              | Os06g0474800 | OsR498G0612408600.01.T03 | J domain-containing protein (Fragment)                                     |
| maker-6-augustus-gene-158.36-mRNA-1 | Japonica | NA       |              |              | OsR498G0612408800.01.T02 | Protein MICRORCHIDIA like                                                  |
| maker-6-augustus-gene-159.0-mRNA-1  | Japonica | Japonica |              | Os06g0476200 | OsR498G0612412710.01.T04 | Phosphoglucosyltransferase (alpha-D-glucose-1,6-bisphosphate-dependent)    |
| maker-6-augustus-gene-159.2-mRNA-1  | Japonica | NA       |              | Os06g0475400 | OsR498G0612409400.01.T01 | Glycosyltransferase                                                        |
| maker-6-augustus-gene-160.0-mRNA-1  | Japonica | Indica   |              | Os06g0357800 | OsR498G0916869000.01.T01 | Cell wall protein-like                                                     |
| maker-6-augustus-gene-161.31-mRNA-1 | Japonica | NA       |              |              | OsR498G0612394600.01.T01 | Phenylcoumaran benzylic ether reductase Pycr5                              |
| maker-6-augustus-gene-162.34-mRNA-1 | Japonica | NA       |              |              | OsR498G0612383600.01.T03 | SANT domain-containing protein                                             |
| maker-6-augustus-gene-162.36-mRNA-1 | Japonica | NA       |              |              | OsR498G0612380800.01.T01 | Polygalacturonase                                                          |
| maker-6-augustus-gene-162.38-mRNA-1 | Japonica | NA       |              | Os06g0480000 | OsR498G0612387100.01.T03 | RING-type E3 ubiquitin transferase                                         |
| maker-6-augustus-gene-163.34-mRNA-1 | Japonica | NA       |              | Os06g0482200 |                          | Amino-acid permease BAT1                                                   |
| maker-6-augustus-gene-163.38-mRNA-1 | Japonica | NA       |              |              |                          | Terpene cyclase/mutase family member                                       |
| maker-6-augustus-gene-164.29-mRNA-1 | Japonica | Japonica |              | Os06g0484600 | OsR498G0612369200.01.T01 | Protein BOLA4, chloroplastic/mitochondrial                                 |
| maker-6-augustus-gene-164.32-mRNA-1 | Japonica | Indica   |              | Os06g0483900 | OsR498G0612369900.01.T02 | SAWADEE domain-containing protein                                          |
| maker-6-augustus-gene-164.35-mRNA-1 | Japonica | NA       |              |              |                          | SAWADEE domain-containing protein (Fragment)                               |
| maker-6-augustus-gene-165.0-mRNA-1  | Japonica | NA       |              | Os06g0486300 | OsR498G0612366600.01.T01 | Barley mlo defense gene homolog1                                           |
| maker-6-augustus-gene-165.11-mRNA-1 | Japonica | NA       | CC-Kinase-TM | Os06g0486400 | OsR498G0612365700.01.T01 | Kinase superfamily protein isoform 1                                       |
| maker-6-augustus-gene-165.4-mRNA-1  | Japonica | NA       |              | Os06g0486800 | OsR498G0612365000.01.T01 | Formate dehydrogenase, mitochondrial                                       |
| maker-6-augustus-gene-165.8-mRNA-1  | Japonica | NA       | Kinase-TM    | Os06g0486000 | OsR498G0612367500.01.T02 | Proline-rich receptor-like protein kinase PERK12                           |
| maker-6-augustus-gene-166.23-mRNA-1 | Japonica | NA       |              | Os06g0486900 | OsR498G0612364400.01.T01 | Formate dehydrogenase, mitochondrial                                       |
| maker-6-augustus-gene-166.25-mRNA-1 | Japonica | NA       |              |              |                          | Ubiquitin-like-specific protease 1D                                        |
| maker-6-augustus-gene-167.0-mRNA-1  | Japonica | Indica   | Kinase       | Os03g0568800 | OsR498G0612359600.01.T01 | Proline-rich receptor-like protein kinase PERK8                            |
| maker-6-augustus-gene-167.11-mRNA-1 | Japonica | NA       |              |              | OsR498G0612358500.01.T01 | Phospholipid-transporting ATPase                                           |
| maker-6-augustus-gene-167.19-mRNA-1 | Japonica | NA       |              | Os06g0489200 | OsR498G0612355300.01.T02 | SURP motif domain-containing protein                                       |
| maker-6-augustus-gene-167.2-mRNA-1  | Japonica | NA       |              | Os06g0488200 | OsR498G0612359200.01.T03 | Myosin-11 like (Fragment)                                                  |
| maker-6-augustus-gene-167.7-mRNA-1  | Japonica | NA       |              | Os06g0489500 | OsR498G0612354800.01.T02 | CMP/dCMP-type deaminase domain-containing protein                          |
| maker-6-augustus-gene-168.35-mRNA-1 | Japonica | NA       |              | Os06g0490400 | OsR498G0612351800.01.T01 | Peroxidase                                                                 |
| maker-6-augustus-gene-168.37-mRNA-1 | Japonica | Indica   |              | Os06g0490700 | OsR498G0612350400.01.T04 |                                                                            |
| maker-6-augustus-gene-168.42-mRNA-1 | Japonica | NA       |              |              | OsR498G0612347800.01.T01 | DUF223 domain-containing protein                                           |
| maker-6-augustus-gene-169.0-mRNA-1  | Japonica | NA       |              |              |                          |                                                                            |
| maker-6-augustus-gene-169.3-mRNA-1  | Japonica | Indica   |              | Os06g0492700 | OsR498G0612341000.01.T01 | Dynein light chain                                                         |
| maker-6-augustus-gene-169.7-mRNA-1  | Japonica | NA       |              | Os06g0492900 | OsR498G0612339600.01.T02 | Putative ribosomal RNA apurinic site specific lyase                        |
| maker-6-augustus-gene-169.9-mRNA-1  | Japonica | NA       |              |              |                          |                                                                            |

|                                     |          |          |           |              |                          |                                                                         |
|-------------------------------------|----------|----------|-----------|--------------|--------------------------|-------------------------------------------------------------------------|
| maker-6-augustus-gene-170.0-mRNA-1  | Japonica | NA       |           |              | OsR498G1120085000.01.T01 | Retrotransposon, putative, centromere-specific                          |
| maker-6-augustus-gene-170.2-mRNA-1  | Japonica | NA       |           | Os06g0493600 | OsR498G0612335000.01.T02 | Phosphate transporter PHO1 like 1                                       |
| maker-6-augustus-gene-172.21-mRNA-1 | Japonica | NA       |           |              | OsR498G0612326200.01.T01 | Zinc finger CCHC domain-containing protein 8                            |
| maker-6-augustus-gene-172.26-mRNA-1 | Japonica | Indica   |           | Os06g0495800 | OsR498G0612326000.01.T01 | Plant-specific domain TIGR01570 family protein                          |
| maker-6-augustus-gene-172.29-mRNA-1 | Japonica | NA       |           | Os06g0496000 | OsR498G0612324600.01.T01 | LSM14 domain-containing protein                                         |
| maker-6-augustus-gene-172.31-mRNA-1 | Japonica | NA       |           |              |                          |                                                                         |
| maker-6-augustus-gene-173.0-mRNA-1  | Japonica | NA       | Kinase-TM |              |                          | Liguleless narrow                                                       |
| maker-6-augustus-gene-173.10-mRNA-1 | Japonica | Japonica |           | Os06g0497600 | OsR498G0612317500.01.T03 |                                                                         |
| maker-6-augustus-gene-173.5-mRNA-1  | Japonica | NA       |           | Os06g0497200 | OsR498G0612318600.01.T03 | 5-epiaristolochene 1,3-dihydroxylase                                    |
| maker-6-augustus-gene-173.7-mRNA-1  | Japonica | NA       |           | Os06g0497400 | OsR498G0612318000.01.T01 | SHSP domain-containing protein                                          |
| maker-6-augustus-gene-174.20-mRNA-1 | Japonica | NA       |           |              |                          | Alpha-glucan water dikinase 1 chloroplastic                             |
| maker-6-augustus-gene-174.28-mRNA-1 | Japonica | NA       |           | Os06g0498500 | OsR498G0612315800.01.T01 | Nucleolar complex protein 3                                             |
| maker-6-augustus-gene-174.32-mRNA-1 | Japonica | NA       |           | Os06g0498900 | OsR498G0612313400.01.T01 | GTP-binding protein BRASSINAZOLE INSENSITIVE PALE GREEN 2 chloroplastic |
| maker-6-augustus-gene-174.34-mRNA-1 | Japonica | NA       |           | Os06g0498800 | OsR498G0612314100.01.T01 | Mother of FT and TFL1                                                   |
| maker-6-augustus-gene-175.32-mRNA-1 | Japonica | NA       |           |              | OsR498G0612313000.01.T04 |                                                                         |
| maker-6-augustus-gene-175.38-mRNA-1 | Japonica | NA       |           |              | OsR498G0612310600.01.T06 |                                                                         |
| maker-6-augustus-gene-175.40-mRNA-1 | Japonica | NA       |           | Os06g0499500 | OsR498G0612311300.01.T02 | Indole-3-acetic acid-amido synthetase GH3.6                             |
| maker-6-augustus-gene-175.42-mRNA-1 | Japonica | NA       |           | Os06g0499900 | OsR498G0612310700.01.T01 | Dihydrolipoamide acetyltransferase component of pyruvate dehydrogenase  |
| maker-6-augustus-gene-175.49-mRNA-1 | Japonica | NA       |           | Os06g0500300 | OsR498G0612310300.01.T01 | Trithorax group protein osa-like                                        |
| maker-6-augustus-gene-175.51-mRNA-1 | Japonica | Indica   |           | Os06g0497200 | OsR498G0612310100.01.T01 | 5-epiaristolochene 1,3-dihydroxylase                                    |
| maker-6-augustus-gene-177.29-mRNA-1 | Japonica | NA       |           | Os06g0502600 |                          | Transducin family protein/WD-40 repeat family protein                   |
| maker-6-augustus-gene-177.33-mRNA-1 | Japonica | NA       |           | Os06g0503400 | OsR498G0612564600.01.T01 | Reticulon-like protein (Fragment)                                       |
| maker-6-augustus-gene-177.36-mRNA-1 | Japonica | Indica   |           | Os11g0481200 | OsR498G0612567100.01.T01 | O-fucosyltransferase family protein (Fragment)                          |
| maker-6-augustus-gene-178.0-mRNA-1  | Japonica | Japonica |           | Os06g0503600 | OsR498G0612582000.01.T04 |                                                                         |
| maker-6-augustus-gene-179.30-mRNA-1 | Japonica | NA       |           | Os06g0505400 | OsR498G0612586100.01.T01 | Membrane peptidase                                                      |
| maker-6-augustus-gene-179.35-mRNA-1 | Japonica | NA       |           | Os06g0506000 | OsR498G0612587500.01.T01 | Plastid division protein PDV                                            |
| maker-6-augustus-gene-179.39-mRNA-1 | Japonica | NA       |           |              |                          | HEAT repeat-containing protein 5A                                       |
| maker-6-augustus-gene-179.47-mRNA-1 | Japonica | NA       |           | Os06g0506200 | OsR498G0612588000.01.T03 | TPT domain-containing protein                                           |
| maker-6-augustus-gene-179.51-mRNA-1 | Japonica | Indica   |           | Os02g0261100 | OsR498G0612589000.01.T02 | Ubiquitin-fold modifier-conjugating enzyme                              |
| maker-6-augustus-gene-180.30-mRNA-1 | Japonica | NA       |           | Os06g0507400 | OsR498G0612592600.01.T02 | BTB/POZ domain-containing protein POB1                                  |
| maker-6-augustus-gene-180.36-mRNA-1 | Japonica | NA       |           | Os06g0508700 | OsR498G0612595200.01.T01 | Methionyl-tRNA synthetase                                               |
| maker-6-augustus-gene-181.0-mRNA-1  | Japonica | NA       |           |              | OsR498G0612926500.01.T01 | Exopolysaccharuronase                                                   |
| maker-6-augustus-gene-181.2-mRNA-1  | Japonica | NA       |           |              | OsR498G0612596000.01.T03 | Mitogen-activated protein kinase                                        |
| maker-6-augustus-gene-181.5-mRNA-1  | Japonica | Indica   |           | Os06g0512700 | OsR498G0612598800.01.T01 | Thionin                                                                 |
| maker-6-augustus-gene-187.2-mRNA-1  | Japonica | NA       |           | Os06g0513943 | OsR498G0612604400.01.T01 | Thionin                                                                 |
| maker-6-augustus-gene-188.0-mRNA-1  | Japonica | NA       |           |              | OsR498G0101949000.01.T01 |                                                                         |
| maker-6-augustus-gene-189.0-mRNA-1  | Japonica | NA       |           |              |                          |                                                                         |
| maker-6-augustus-gene-190.27-mRNA-1 | Japonica | Indica   |           | Os06g0520600 | OsR498G0612625900.01.T02 | MI domain-containing protein                                            |
| maker-6-augustus-gene-190.33-mRNA-1 | Japonica | NA       |           |              |                          | Serine carboxypeptidase family protein, expressed                       |
| maker-6-augustus-gene-191.0-mRNA-1  | Japonica | NA       |           | Os06g0521200 | OsR498G0612633100.01.T01 | Peroxidase                                                              |
| maker-6-augustus-gene-191.2-mRNA-1  | Japonica | NA       |           |              |                          | Putative harbinger transposase-derived protein                          |
| maker-6-augustus-gene-191.5-mRNA-1  | Japonica | NA       |           | Os06g0521400 | OsR498G0612633800.01.T01 | Peroxidase                                                              |
| maker-6-augustus-gene-191.7-mRNA-1  | Japonica | NA       |           | Os06g0521500 | OsR498G0612634000.01.T01 | Peroxidase                                                              |
| maker-6-augustus-gene-192.0-mRNA-1  | Japonica | NA       |           | Os06g0521900 | OsR498G0612635600.01.T01 | Peroxidase                                                              |
| maker-6-augustus-gene-192.2-mRNA-1  | Japonica | NA       |           | Os06g0522300 | OsR498G0612636600.01.T01 | Peroxidase                                                              |
| maker-6-augustus-gene-193.34-mRNA-1 | Japonica | Japonica |           | Os06g0523800 | OsR498G0510328400.01.T03 | Crooked neck                                                            |
| maker-6-augustus-gene-193.37-mRNA-1 | Japonica | NA       |           | Os06g0524300 | OsR498G0612644700.01.T02 | Extra-large G-protein-like                                              |
| maker-6-augustus-gene-193.41-mRNA-1 | Japonica | NA       |           | Os06g0524400 | OsR498G0612645500.01.T01 | Protein trichome birefringence-like                                     |
| maker-6-augustus-gene-193.47-mRNA-1 | Japonica | NA       |           | Os12g0512200 |                          | Transposon protein, putative, Mariner sub-class                         |
| maker-6-augustus-gene-194.39-mRNA-1 | Japonica | NA       | NBS-TM    |              |                          | Disease resistance protein RPP13                                        |
| maker-6-augustus-gene-194.41-mRNA-1 | Japonica | NA       |           | Os06g0526100 | OsR498G0612650500.01.T01 | Transcription factor SPEECHLESS                                         |
| maker-6-augustus-gene-194.43-mRNA-1 | Japonica | Japonica |           | Os06g0525000 | OsR498G0612647000.01.T02 | PHD finger protein like                                                 |
| maker-6-augustus-gene-195.0-mRNA-1  | Japonica | NA       |           | Os06g0527100 | OsR498G0612664900.01.T01 | Cyclic nucleotide-gated ion channel 1                                   |
| maker-6-augustus-gene-195.23-mRNA-1 | Japonica | NA       |           | Os06g0528300 |                          | Absciscic acid receptor like                                            |
| maker-6-augustus-gene-195.5-mRNA-1  | Japonica | NA       |           | Os06g0527100 | OsR498G0612666700.01.T02 | Cyclic nucleotide-gated calmodulin-binding ion channel                  |
| maker-6-augustus-gene-195.9-mRNA-1  | Japonica | NA       |           | Os06g0528600 | OsR498G0612669900.01.T06 | PABS domain-containing protein (Fragment)                               |
| maker-6-augustus-gene-197.10-mRNA-1 | Japonica | Indica   |           | Os06g0531200 | OsR498G0612678800.01.T01 | Class I glutamine amidotransferase-like superfamily protein isoform 1   |
| maker-6-augustus-gene-197.4-mRNA-1  | Japonica | NA       |           | Os06g0531000 | OsR498G0612677900.01.T01 | Glucan endo-1,3-beta-D-glucosidase                                      |
| maker-6-augustus-gene-197.9-mRNA-1  | Japonica | NA       |           | Os06g0530700 | OsR498G0612676800.01.T03 | tRNA-intron lyase                                                       |
| maker-6-augustus-gene-198.21-mRNA-1 | Japonica | NA       |           | Os06g0531600 | OsR498G0612679600.01.T01 | GDSL esterase/lipase                                                    |
| maker-6-augustus-gene-198.23-mRNA-1 | Japonica | Indica   |           | Os10g0128400 | OsR498G0612680000.01.T05 |                                                                         |

|                                     |          |          |               |              |                          |                                                                      |
|-------------------------------------|----------|----------|---------------|--------------|--------------------------|----------------------------------------------------------------------|
| maker-6-augustus-gene-198.25-mRNA-1 | Japonica | NA       |               | Os06g0531900 | OsR498G0612680600.01.T01 | GD5L esterase/lipase                                                 |
| maker-6-augustus-gene-2.36-mRNA-1   | Japonica | NA       |               | Os06g0102100 | OsR498G0611469100.01.T01 | 3,9-dihydroxypterocarpan 6A-monooxygenase                            |
| maker-6-augustus-gene-2.38-mRNA-1   | Japonica | Indica   |               | Os06g0102300 | OsR498G0611469300.01.T01 | Glutathione gamma-glutamylcysteinyltransferase                       |
| maker-6-augustus-gene-2.44-mRNA-1   | Japonica | Japonica |               | Os06g0102600 | OsR498G0611470700.01.T02 | Sec-independent protein translocase protein TATB, chloroplastic      |
| maker-6-augustus-gene-2.46-mRNA-1   | Japonica | NA       |               | Os06g0102700 | OsR498G0611470900.01.T02 | RING-type E3 ubiquitin transferase                                   |
| maker-6-augustus-gene-2.50-mRNA-1   | Japonica | NA       |               | Os06g0102750 |                          | U-box domain-containing protein 14                                   |
| maker-6-augustus-gene-2.56-mRNA-1   | Japonica | NA       |               |              | OsR498G0611471500.01.T01 | Helicase C-terminal domain-containing protein                        |
| maker-6-augustus-gene-2.62-mRNA-1   | Japonica | NA       |               | Os06g0103500 | OsR498G0611472700.01.T01 | Acyl-coenzyme A oxidase                                              |
| maker-6-augustus-gene-2.67-mRNA-1   | Japonica | NA       |               | Os06g0103600 | OsR498G0611472900.01.T09 | Glycine--tRNA ligase                                                 |
| maker-6-augustus-gene-2.82-mRNA-1   | Japonica | NA       |               | Os06g0103300 | OsR498G0611472200.01.T04 | Homogentisate 1,2-dioxygenase                                        |
| maker-6-augustus-gene-2.87-mRNA-1   | Japonica | NA       |               |              | OsR498G0611472600.01.T01 | Integrator complex subunit 9-like protein                            |
| maker-6-augustus-gene-2.89-mRNA-1   | Japonica | NA       |               | Os06g0103700 | OsR498G0611473200.01.T01 | Glutaminy-peptide cyclotransferase                                   |
| maker-6-augustus-gene-200.44-mRNA-1 | Japonica | NA       |               |              | OsR498G0612689500.01.T01 | DEAD-box ATP-dependent RNA helicase 27                               |
| maker-6-augustus-gene-200.46-mRNA-1 | Japonica | Japonica |               | Os06g0696900 | OsR498G0612692700.01.T01 | Macro domain-containing protein VPA0103                              |
| maker-6-augustus-gene-200.49-mRNA-1 | Japonica | NA       |               |              |                          | NAD-dependent malic enzyme 1                                         |
| maker-6-augustus-gene-201.0-mRNA-1  | Japonica | NA       |               | Os06g0538000 | OsR498G0612698700.01.T01 | T-complex protein 1 subunit gamma                                    |
| maker-6-augustus-gene-201.10-mRNA-1 | Japonica | NA       |               | Os08g0118100 | OsR498G0204699100.01.T01 | ACT domain repeat 8                                                  |
| maker-6-augustus-gene-205.38-mRNA-1 | Japonica | NA       |               |              | OsR498G0612718500.01.T01 | Large subunit ribosomal protein L1                                   |
| maker-6-augustus-gene-205.50-mRNA-1 | Japonica | NA       |               | Os06g0546500 | OsR498G0612719200.01.T01 | Peroxidase                                                           |
| maker-6-augustus-gene-206.0-mRNA-1  | Japonica | NA       | Kinase-TM     | Os06g0547900 | OsR498G0612721100.01.T02 | Non-specific serine/threonine protein kinase                         |
| maker-6-augustus-gene-207.44-mRNA-1 | Japonica | NA       |               | Os06g0551500 | OsR498G0612730300.01.T02 |                                                                      |
| maker-6-augustus-gene-207.48-mRNA-1 | Japonica | NA       |               | Os06g0550000 | OsR498G0612727000.01.T01 | 60S ribosomal protein L11                                            |
| maker-6-augustus-gene-208.19-mRNA-1 | Japonica | NA       |               | Os06g0552300 | OsR498G0612733300.01.T01 | BES1/BZR1 like protein 4                                             |
| maker-6-augustus-gene-208.23-mRNA-1 | Japonica | NA       |               | Os06g0552400 | OsR498G0612733600.01.T03 | FYVE-type domain-containing protein (Fragment)                       |
| maker-6-augustus-gene-208.27-mRNA-1 | Japonica | NA       |               | Os06g0552900 | OsR498G0612736000.01.T01 |                                                                      |
| maker-6-augustus-gene-208.29-mRNA-1 | Japonica | Indica   |               | Os02g0232000 | OsR498G0612737600.01.T01 | Heat stress transcription factor                                     |
| maker-6-augustus-gene-208.31-mRNA-1 | Japonica | NA       |               | Os06g0553200 | OsR498G0612738400.01.T01 | Meiosis 5                                                            |
| maker-6-augustus-gene-209.0-mRNA-1  | Japonica | NA       |               |              | OsR498G0612746500.01.T02 | Kinesin motor domain-containing protein                              |
| maker-6-augustus-gene-209.10-mRNA-1 | Japonica | Indica   |               | Os06g0554800 | OsR498G0612746800.01.T03 | ABC-2 and Plant PDR ABC-type transporter family protein isoform 1    |
| maker-6-augustus-gene-209.8-mRNA-1  | Japonica | Indica   |               | Os06g0553800 | OsR498G0612742200.01.T01 | Phytoecyanin domain-containing protein (Fragment)                    |
| maker-6-augustus-gene-210.0-mRNA-1  | Japonica | Indica   |               | Os02g0229000 | OsR498G0612749100.01.T01 | 40S ribosomal protein S24                                            |
| maker-6-augustus-gene-210.12-mRNA-1 | Japonica | NA       |               | Os06g0556300 |                          | F-box domain-containing protein (Fragment)                           |
| maker-6-augustus-gene-210.3-mRNA-1  | Japonica | NA       |               | Os06g0556000 | OsR498G0612751100.01.T01 | Amino acid permease                                                  |
| maker-6-augustus-gene-210.6-mRNA-1  | Japonica | Indica   |               | Os06g0556600 | OsR498G0612752700.01.T01 | Major pollen allergen Lol p 11                                       |
| maker-6-augustus-gene-210.8-mRNA-1  | Japonica | NA       |               | Os06g0555500 | OsR498G0612749400.01.T01 | tRNA A64-2'-O-ribosylphosphate transferase isoform X1                |
| maker-6-augustus-gene-211.0-mRNA-1  | Japonica | NA       | Kinase-LRR-TM | Os06g0557100 | OsR498G0612756500.01.T04 | Protein kinase family protein with leucine-rich repeat domain        |
| maker-6-augustus-gene-211.2-mRNA-1  | Japonica | NA       | Kinase-LRR-TM | Os06g0557700 | OsR498G0612758100.01.T01 | Serine/threonine protein kinase                                      |
| maker-6-augustus-gene-212.0-mRNA-1  | Japonica | NA       |               | Os06g0559400 | OsR498G0612763700.01.T01 |                                                                      |
| maker-6-augustus-gene-212.10-mRNA-1 | Japonica | NA       |               |              | OsR498G0612763600.01.T02 | Acid phosphatase Class B                                             |
| maker-6-augustus-gene-212.12-mRNA-1 | Japonica | NA       |               |              |                          | NAC domain-containing protein 8                                      |
| maker-6-augustus-gene-212.15-mRNA-1 | Japonica | NA       |               | Os06g0560400 | OsR498G0612766200.01.T02 | DUF862 domain-containing protein                                     |
| maker-6-augustus-gene-212.2-mRNA-1  | Japonica | NA       |               | Os06g0560000 | OsR498G0612764700.01.T01 | Solute carrier family 40 member 1                                    |
| maker-6-augustus-gene-212.6-mRNA-1  | Japonica | NA       |               | Os06g0558700 | OsR498G0612762400.01.T03 | Polynucleotide adenyllyltransferase                                  |
| maker-6-augustus-gene-213.0-mRNA-1  | Japonica | NA       |               | Os06g0560700 | OsR498G0612766900.01.T01 | Anther-specific proline-rich protein APG                             |
| maker-6-augustus-gene-213.2-mRNA-1  | Japonica | NA       |               | Os06g0561000 | OsR498G0612767700.01.T05 | Inositol oxygenase                                                   |
| maker-6-augustus-gene-214.25-mRNA-1 | Japonica | NA       |               | Os06g0561800 |                          | ATP-binding cassette sub-family C member 8                           |
| maker-6-augustus-gene-214.29-mRNA-1 | Japonica | NA       |               | Os06g0562300 |                          | Homeobox domain-containing protein (Fragment)                        |
| maker-6-augustus-gene-214.32-mRNA-1 | Japonica | NA       |               | Os06g0562600 | OsR498G0612773400.01.T01 | T-complex protein 1 subunit epsilon                                  |
| maker-6-augustus-gene-214.37-mRNA-1 | Japonica | NA       |               |              | OsR498G0612773600.01.T02 | ATP/GTP-binding protein family                                       |
| maker-6-augustus-gene-215.0-mRNA-1  | Japonica | NA       |               | Os06g0563300 | OsR498G0612775700.01.T02 | Serine/threonine-protein phosphatase 2A 55 kDa regulatory subunit B  |
| maker-6-augustus-gene-215.14-mRNA-1 | Japonica | NA       |               | Os06g0564500 | OsR498G0612777500.01.T02 | PALP domain-containing protein                                       |
| maker-6-augustus-gene-215.18-mRNA-1 | Japonica | Indica   |               | Os06g0564500 | OsR498G0612785600.01.T01 | PALP domain-containing protein                                       |
| maker-6-augustus-gene-215.20-mRNA-1 | Japonica | NA       |               | Os06g0564700 | OsR498G0612786600.01.T01 | PALP domain-containing protein                                       |
| maker-6-augustus-gene-215.4-mRNA-1  | Japonica | NA       |               |              | OsR498G0612778200.01.T05 | Linoleic acid1                                                       |
| maker-6-augustus-gene-215.9-mRNA-1  | Japonica | NA       |               | Os06g0563000 | OsR498G0612774000.01.T01 | Pollen-specific protein SF21                                         |
| maker-6-augustus-gene-216.30-mRNA-1 | Japonica | NA       |               | Os06g0565200 | OsR498G0612788300.01.T01 | Heat shock transcription factor                                      |
| maker-6-augustus-gene-216.35-mRNA-1 | Japonica | NA       |               |              | OsR498G0102498700.01.T01 |                                                                      |
| maker-6-augustus-gene-216.37-mRNA-1 | Japonica | NA       |               | Os09g0258800 |                          | Ulp1 protease family, C-terminal catalytic domain containing protein |
| maker-6-augustus-gene-216.41-mRNA-1 | Japonica | NA       |               |              | OsR498G0612791100.01.T03 | Phospholipid-transporting ATPase                                     |
| maker-6-augustus-gene-216.48-mRNA-1 | Japonica | Indica   |               | Os06g0566100 | OsR498G0612791500.01.T01 | Heterogeneous nuclear ribonucleoprotein 1                            |
| maker-6-augustus-gene-216.54-mRNA-1 | Japonica | NA       |               |              | OsR498G0612792100.01.T02 | Zinc transporter 4, chloroplastic                                    |

|                                     |          |          |               |              |                          |                                                                    |
|-------------------------------------|----------|----------|---------------|--------------|--------------------------|--------------------------------------------------------------------|
| maker-6-augustus-gene-216.59-mRNA-1 | Japonica | Indica   |               | Os03g0180700 | OsR498G0612787000.01.T03 | UDP-glycosyltransferase TURAN                                      |
| maker-6-augustus-gene-216.71-mRNA-1 | Japonica | NA       |               | Os06g0565100 | OsR498G0612787800.01.T01 | Thromboxane-A synthase                                             |
| maker-6-augustus-gene-216.73-mRNA-1 | Japonica | Japonica |               | Os06g0565300 | OsR498G0612788600.01.T01 | High mobility group nucleosome-binding domain-containing protein 5 |
| maker-6-augustus-gene-216.75-mRNA-1 | Japonica | NA       |               | Os09g0258900 |                          |                                                                    |
| maker-6-augustus-gene-217.2-mRNA-1  | Japonica | NA       |               |              | OsR498G0612796300.01.T01 | L-ascorbate oxidase                                                |
| maker-6-augustus-gene-217.5-mRNA-1  | Japonica | NA       |               |              | OsR498G0305907400.01.T01 |                                                                    |
| maker-6-augustus-gene-217.6-mRNA-1  | Japonica | NA       |               | Os02g0616600 | OsR498G0407741700.01.T02 |                                                                    |
| maker-6-augustus-gene-218.43-mRNA-1 | Japonica | Indica   |               | Os06g0567900 | OsR498G0612796500.01.T03 | L-ascorbate oxidase                                                |
| maker-6-augustus-gene-218.49-mRNA-1 | Japonica | Indica   |               | Os06g0568000 | OsR498G0612796800.01.T01 | Transmembrane 9 superfamily member                                 |
| maker-6-augustus-gene-218.51-mRNA-1 | Japonica | NA       |               | Os06g0568200 | OsR498G0612797000.01.T01 | Vacuolar ATP synthase subunit B                                    |
| maker-6-augustus-gene-218.62-mRNA-1 | Japonica | NA       |               | Os06g0569500 | OsR498G0612799200.01.T01 | Ent-kaurene oxidase 2                                              |
| maker-6-augustus-gene-219.28-mRNA-1 | Japonica | Japonica |               | Os06g0570950 | OsR498G0612803900.01.T01 | BHLH domain-containing protein (Fragment)                          |
| maker-6-augustus-gene-219.31-mRNA-1 | Japonica | NA       |               |              |                          | Threonine synthase 1 chloroplastic                                 |
| maker-6-augustus-gene-219.34-mRNA-1 | Japonica | Indica   |               | Os06g0570100 | OsR498G0612801600.01.T01 | Ent-kaurene oxidase 2                                              |
| maker-6-augustus-gene-219.35-mRNA-1 | Japonica | NA       |               |              |                          |                                                                    |
| maker-6-augustus-gene-219.40-mRNA-1 | Japonica | NA       |               | Os06g0570100 | OsR498G0612801000.01.T01 | Ent-kaurene oxidase                                                |
| maker-6-augustus-gene-219.44-mRNA-1 | Japonica | Indica   |               | Os06g0571100 | OsR498G0612804400.01.T03 | Histone deacetylase                                                |
| maker-6-augustus-gene-219.48-mRNA-1 | Japonica | NA       |               | Os06g0571400 | OsR498G0612805400.01.T01 | Eukaryotic elongation factor 1 gamma                               |
| maker-6-augustus-gene-220.0-mRNA-1  | Japonica | NA       |               | Os06g0573600 | OsR498G0612810100.01.T01 | Beta-galactosidase 4                                               |
| maker-6-augustus-gene-220.7-mRNA-1  | Japonica | NA       |               |              | OsR498G0612807200.01.T01 | Cytokinin dehydrogenase                                            |
| maker-6-augustus-gene-220.9-mRNA-1  | Japonica | NA       |               | Os06g0572400 | OsR498G0612807400.01.T01 | Senescence-associated protein 5                                    |
| maker-6-augustus-gene-221.0-mRNA-1  | Japonica | NA       |               |              | OsR498G0612811700.01.T02 | Coclaurine N-methyltransferase                                     |
| maker-6-augustus-gene-221.10-mRNA-1 | Japonica | NA       |               |              | OsR498G0612810800.01.T01 | Aminocyclopropane-1-carboxylate oxidase                            |
| maker-6-augustus-gene-221.12-mRNA-1 | Japonica | NA       | Kinase-TM     | Os06g0574200 | OsR498G0612812000.01.T01 | E3 ubiquitin ligase                                                |
| maker-6-augustus-gene-221.16-mRNA-1 | Japonica | NA       |               |              | OsR498G0612813200.01.T01 | Transcriptional elongation regulator MINYO                         |
| maker-6-augustus-gene-221.19-mRNA-1 | Japonica | NA       |               | Os06g0574900 | OsR498G0612815400.01.T01 |                                                                    |
| maker-6-augustus-gene-221.5-mRNA-1  | Japonica | NA       |               | Os06g0574500 | OsR498G0612814100.01.T01 | Serine/threonine-protein phosphatase                               |
| maker-6-augustus-gene-222.44-mRNA-1 | Japonica | NA       |               | Os05g0219300 |                          | Zinc finger BED domain-containing protein DAYSLEEPER               |
| maker-6-augustus-gene-223.32-mRNA-1 | Japonica | NA       |               | Os06g0576900 | OsR498G0612827900.01.T01 | von Willebrand factor type A domain-like                           |
| maker-6-augustus-gene-223.34-mRNA-1 | Japonica | NA       |               |              | OsR498G0612829500.01.T01 | Low-affinity cation transporter                                    |
| maker-6-augustus-gene-223.38-mRNA-1 | Japonica | NA       |               |              | OsR498G0612829700.01.T01 |                                                                    |
| maker-6-augustus-gene-223.39-mRNA-1 | Japonica | NA       |               | Os06g0578100 | OsR498G0612825400.01.T01 | von Willebrand factor type A domain-like                           |
| maker-6-augustus-gene-224.21-mRNA-1 | Japonica | NA       |               | Os06g0581300 | OsR498G0612834500.01.T01 | Phospho-N-acetylmuramoyl-pentapeptide-transferase                  |
| maker-6-augustus-gene-224.26-mRNA-1 | Japonica | NA       |               | Os06g0581000 | OsR498G0612832000.01.T01 | Nitrate transporter 1.2                                            |
| maker-6-augustus-gene-224.30-mRNA-1 | Japonica | NA       | Kinase-LRR-TM |              |                          | LRR receptor-like serine/threonine-protein kinase EFR              |
| maker-6-augustus-gene-225.34-mRNA-1 | Japonica | Indica   | Kinase-LRR-TM | Os12g0498650 | OsR498G0612836400.01.T01 | Putative LRR receptor-like serine/threonine-protein kinase         |
| maker-6-augustus-gene-225.37-mRNA-1 | Japonica | Indica   | Kinase-LRR-TM | Os06g0587900 | OsR498G0612837400.01.T02 | Putative LRR receptor-like serine/threonine-protein kinase         |
| maker-6-augustus-gene-228.0-mRNA-1  | Japonica | Japonica | Kinase-LRR-TM | Os06g0586150 | OsR498G0612846900.01.T01 | Putative LRR receptor-like serine/threonine-protein kinase         |
| maker-6-augustus-gene-228.1-mRNA-1  | Japonica | NA       | Kinase-LRR-TM |              | OsR498G0612847900.01.T01 | Putative LRR receptor-like serine/threonine-protein kinase         |
| maker-6-augustus-gene-228.11-mRNA-1 | Japonica | Indica   |               | Os06g0587100 | OsR498G0612847800.01.T01 | Putative J domain-containing protein C3E7.11c                      |
| maker-6-augustus-gene-228.8-mRNA-1  | Japonica | NA       |               |              | OsR498G0612846200.01.T01 | GRF-type domain-containing protein                                 |
| maker-6-augustus-gene-229.0-mRNA-1  | Japonica | NA       | Kinase-LRR-TM |              | OsR498G0612851100.01.T02 | Leucine-rich repeat protein kinase family protein                  |
| maker-6-augustus-gene-230.0-mRNA-1  | Japonica | NA       | Kinase-LRR-TM |              |                          | Protein kinase domain-containing protein (Fragment)                |
| maker-6-augustus-gene-230.4-mRNA-1  | Japonica | NA       |               |              |                          |                                                                    |
| maker-6-augustus-gene-231.0-mRNA-1  | Japonica | NA       |               |              | OsR498G0102056900.01.T01 | L10-interacting MYB domain-containing protein-like                 |
| maker-6-augustus-gene-231.4-mRNA-1  | Japonica | NA       |               | Os06g0589500 | OsR498G0612857700.01.T01 |                                                                    |
| maker-6-augustus-gene-231.9-mRNA-1  | Japonica | NA       |               | Os06g0589300 | OsR498G0612857000.01.T01 | ABC transporter domain-containing protein (Fragment)               |
| maker-6-augustus-gene-232.45-mRNA-1 | Japonica | NA       | Kinase-LRR-TM |              | OsR498G0612858300.01.T01 | Leucine-rich repeat protein kinase family protein                  |
| maker-6-augustus-gene-232.49-mRNA-1 | Japonica | NA       |               |              | OsR498G0612863100.01.T06 | Putative NADP-retinol dehydrogenase                                |
| maker-6-augustus-gene-232.54-mRNA-1 | Japonica | NA       |               | Os06g0590500 | OsR498G0612863300.01.T01 | t-SNARE coiled-coil homology domain-containing protein (Fragment)  |
| maker-6-augustus-gene-232.58-mRNA-1 | Japonica | Japonica |               | Os06g0591400 | OsR498G0612866100.01.T01 |                                                                    |
| maker-6-augustus-gene-232.60-mRNA-1 | Japonica | NA       |               |              |                          | Polyadenylate-binding protein                                      |
| maker-6-augustus-gene-233.50-mRNA-1 | Japonica | Indica   |               | Os01g0591000 | OsR498G0612870300.01.T01 | Aldedh domain-containing protein (Fragment)                        |
| maker-6-augustus-gene-233.53-mRNA-1 | Japonica | NA       |               | Os06g0593100 | OsR498G0612871100.01.T01 | UDP-galactose transporter                                          |
| maker-6-augustus-gene-233.56-mRNA-1 | Japonica | NA       |               | Os06g0591600 | OsR498G0612867200.01.T01 | Two-on-two hemoglobin-3                                            |
| maker-6-augustus-gene-234.0-mRNA-1  | Japonica | NA       |               |              |                          | ATP-dependent caseinolytic (Clp) protease/crotonase family protein |
| maker-6-augustus-gene-234.7-mRNA-1  | Japonica | Indica   |               | Os06g0595800 | OsR498G0612878300.01.T01 | Acyl transferase 7                                                 |
| maker-6-augustus-gene-235.30-mRNA-1 | Japonica | NA       |               | Os06g0597000 | OsR498G0612881500.01.T01 | Auxin-responsive protein (Fragment)                                |
| maker-6-augustus-gene-235.32-mRNA-1 | Japonica | NA       |               | Os06g0597200 | OsR498G0612881900.01.T02 | Protein-serine/threonine phosphatase                               |
| maker-6-augustus-gene-236.51-mRNA-1 | Japonica | NA       |               | Os06g0598900 | OsR498G0612886000.01.T01 | serine-threonine kinase receptor-associated protein isoform X1     |
| maker-6-augustus-gene-237.23-mRNA-1 | Japonica | NA       |               | Os06g0600100 | OsR498G0612887100.01.T01 | 26S proteasome regulatory particle triple-A ATPase subunit6        |

|                                     |          |          |           |              |                          |                                                                        |
|-------------------------------------|----------|----------|-----------|--------------|--------------------------|------------------------------------------------------------------------|
| maker-6-augustus-gene-237.25-mRNA-1 | Japonica | NA       |           | Os06g0600301 | OsR498G0612887300.01.T01 | GTP-binding nuclear protein Ran-3                                      |
| maker-6-augustus-gene-237.30-mRNA-1 | Japonica | NA       |           | Os06g0601000 | OsR498G0612890300.01.T02 | Overexpressor of cationic peroxidase                                   |
| maker-6-augustus-gene-237.33-mRNA-1 | Japonica | NA       |           | Os06g0600700 | OsR498G0612889800.01.T03 | Plant Tudor-like RNA-binding protein                                   |
| maker-6-augustus-gene-238.31-mRNA-1 | Japonica | Indica   |           | Os09g0422500 | OsR498G0612891900.01.T01 | Cellulose synthase A catalytic subunit 7                               |
| maker-6-augustus-gene-238.32-mRNA-1 | Japonica | NA       |           |              | OsR498G0612891900.01.T01 | Cellulose synthase A catalytic subunit 7                               |
| maker-6-augustus-gene-238.35-mRNA-1 | Japonica | Indica   |           | Os06g0602200 | OsR498G0306739200.01.T01 | Expressed protein, having alternative splicing products                |
| maker-6-augustus-gene-238.42-mRNA-1 | Japonica | NA       |           | Os06g0602600 | OsR498G0612893900.01.T01 | Alba domain-containing protein (Fragment)                              |
| maker-6-augustus-gene-238.44-mRNA-1 | Japonica | Indica   |           | Os03g0692000 | OsR498G0612895100.01.T01 | beta-glucuronosyltransferase GlcAT14A-like                             |
| maker-6-augustus-gene-238.47-mRNA-1 | Japonica | Indica   |           | Os05g0171300 | OsR498G0612894200.01.T03 | Adenine nucleotide transporter BT1 chloroplastic/mitochondrial         |
| maker-6-augustus-gene-238.49-mRNA-1 | Japonica | Japonica |           | Os06g0602900 | OsR498G0612895400.01.T01 | NADP-dependent alkenal double bond reductase                           |
| maker-6-augustus-gene-238.52-mRNA-1 | Japonica | NA       |           | Os06g0603000 | OsR498G0612895800.01.T01 | Heme oxygenase                                                         |
| maker-6-augustus-gene-239.0-mRNA-1  | Japonica | NA       |           | Os06g0604100 |                          |                                                                        |
| maker-6-augustus-gene-239.11-mRNA-1 | Japonica | NA       |           | Os06g0603600 | OsR498G0612897800.01.T01 | SPX domain-containing protein 1                                        |
| maker-6-augustus-gene-239.15-mRNA-1 | Japonica | Indica   |           | Os02g0202000 | OsR498G0612899800.01.T01 | AP domain containing transcription factor                              |
| maker-6-augustus-gene-239.17-mRNA-1 | Japonica | NA       |           | Os06g0604200 | OsR498G0612900400.01.T01 | Phospholipase D                                                        |
| maker-6-augustus-gene-239.2-mRNA-1  | Japonica | NA       |           | Os06g0604300 | OsR498G0612901100.01.T01 | Phospholipase D                                                        |
| maker-6-augustus-gene-239.4-mRNA-1  | Japonica | NA       |           | Os06g0604400 | OsR498G0612901700.01.T01 | Phospholipase D                                                        |
| maker-6-augustus-gene-239.6-mRNA-1  | Japonica | NA       |           | Os06g0604500 | OsR498G0612902300.01.T02 | Calcium-binding mitochondrial carrier protein like                     |
| maker-6-augustus-gene-239.9-mRNA-1  | Japonica | NA       |           | Os06g0604600 | OsR498G0612903300.01.T02 |                                                                        |
| maker-6-augustus-gene-240.27-mRNA-1 | Japonica | NA       |           |              | OsR498G0612904700.01.T01 |                                                                        |
| maker-6-augustus-gene-240.29-mRNA-1 | Japonica | NA       |           | Os06g0605300 |                          | Ac-like transposase THELMA13                                           |
| maker-6-augustus-gene-240.31-mRNA-1 | Japonica | NA       |           |              | OsR498G0612905500.01.T01 |                                                                        |
| maker-6-augustus-gene-240.33-mRNA-1 | Japonica | Indica   |           | Os02g0200900 | OsR498G0612908900.01.T02 | EIN3-binding F-box protein 1                                           |
| maker-6-augustus-gene-240.35-mRNA-1 | Japonica | NA       |           |              | OsR498G0612906800.01.T01 | transcription factor MYB101                                            |
| maker-6-augustus-gene-240.40-mRNA-1 | Japonica | NA       | Kinase-TM | Os06g0606000 | OsR498G0612909400.01.T01 | Non-specific serine/threonine protein kinase                           |
| maker-6-augustus-gene-241.0-mRNA-1  | Japonica | NA       |           | Os06g0606700 |                          | Equilibrative nucleotide transporter 8-like                            |
| maker-6-augustus-gene-241.1-mRNA-1  | Japonica | NA       |           | Os06g0606700 |                          | Equilibrative nucleotide transporter 8-like                            |
| maker-6-augustus-gene-241.12-mRNA-1 | Japonica | NA       |           | Os06g0607000 | OsR498G0612912700.01.T01 | Glucan endo-1,3-beta-glucosidase 14                                    |
| maker-6-augustus-gene-241.18-mRNA-1 | Japonica | Indica   |           | Os02g0200000 | OsR498G0612914400.01.T03 | Phosphatidylinositol/phosphatidylcholine transfer protein SFH2-like    |
| maker-6-augustus-gene-241.6-mRNA-1  | Japonica | NA       |           |              | OsR498G0612911700.01.T05 |                                                                        |
| maker-6-augustus-gene-242.38-mRNA-1 | Japonica | NA       |           | Os06g0607700 | OsR498G0612914900.01.T01 | ABC transporter G family member                                        |
| maker-6-augustus-gene-242.40-mRNA-1 | Japonica | NA       |           | Os06g0607800 | OsR498G0612915100.01.T01 | 26S proteasome regulatory particle triple-A ATPase subunit4            |
| maker-6-augustus-gene-242.43-mRNA-1 | Japonica | NA       |           | Os06g0607900 | OsR498G0612915300.01.T01 | C2 and GRAM domain-containing protein (Fragment)                       |
| maker-6-augustus-gene-242.45-mRNA-1 | Japonica | NA       |           | Os06g0608401 | OsR498G0612916700.01.T01 | Dolichol phosphate-mannose biosynthesis regulatory protein             |
| maker-6-augustus-gene-242.47-mRNA-1 | Japonica | NA       |           | Os06g0608500 | OsR498G0612916900.01.T02 | Vacuolar protein sorting-associated protein 1                          |
| maker-6-augustus-gene-242.52-mRNA-1 | Japonica | NA       |           | Os06g0608600 | OsR498G0612917100.01.T04 | Vesicle transport protein (Fragment)                                   |
| maker-6-augustus-gene-242.55-mRNA-1 | Japonica | NA       |           | Os06g0608700 | OsR498G0612917100.01.T05 | Fructose-bisphosphate aldolase                                         |
| maker-6-augustus-gene-242.57-mRNA-1 | Japonica | NA       |           | Os06g0607300 |                          | HGWP repeat containing protein-like                                    |
| maker-6-augustus-gene-242.59-mRNA-1 | Japonica | Japonica |           | Os06g0607400 | OsR498G0510566200.01.T01 | Transposon protein, putative, CACTA, En/Spm sub-class                  |
| maker-6-augustus-gene-242.62-mRNA-1 | Japonica | Indica   |           | Os06g0608100 | OsR498G0612916400.01.T01 |                                                                        |
| maker-6-augustus-gene-242.67-mRNA-1 | Japonica | NA       |           | Os06g0608300 | OsR498G0612916600.01.T01 | U5 small nuclear ribonucleoprotein component CLO like                  |
| maker-6-augustus-gene-242.71-mRNA-1 | Japonica | NA       |           | Os06g0608800 | OsR498G0612917400.01.T01 | E3 ubiquitin-protein ligase RGLG1                                      |
| maker-6-augustus-gene-243.26-mRNA-1 | Japonica | Indica   |           | Os02g0198700 | OsR498G0612919100.01.T01 | Subtilisin-like protease                                               |
| maker-6-augustus-gene-243.28-mRNA-1 | Japonica | Indica   |           | Os02g0198300 | OsR498G0612919300.01.T02 | ADP-ribosylation factor GTPase-activating protein AGD12                |
| maker-6-augustus-gene-243.33-mRNA-1 | Japonica | NA       |           | Os06g0609500 | OsR498G0612919500.01.T05 | MYB-CC type transfactor                                                |
| maker-6-augustus-gene-243.36-mRNA-1 | Japonica | Indica   |           | Os06g0609800 | OsR498G0612920500.01.T01 | Serine/arginine repetitive matrix protein 2                            |
| maker-6-augustus-gene-243.40-mRNA-1 | Japonica | Indica   |           | Os06g0609900 | OsR498G0612920700.01.T01 |                                                                        |
| maker-6-augustus-gene-243.42-mRNA-1 | Japonica | NA       |           | Os06g0610800 | OsR498G0612924300.01.T02 | Aspartic proteinase nepenthesin-1                                      |
| maker-6-augustus-gene-243.45-mRNA-1 | Japonica | NA       |           | Os06g0609600 | OsR498G0612919800.01.T02 | probable calcium-binding protein CML21                                 |
| maker-6-augustus-gene-243.48-mRNA-1 | Japonica | NA       |           | Os06g0609700 | OsR498G0612920200.01.T02 | Alpha/beta-Hydrolases superfamily protein                              |
| maker-6-augustus-gene-243.52-mRNA-1 | Japonica | Japonica |           | Os06g0610100 | OsR498G0612921400.01.T01 | Bifunctional monodehydroascorbate reductase and carbonic anhydrase nec |
| maker-6-augustus-gene-243.54-mRNA-1 | Japonica | NA       |           |              | OsR498G0612924200.01.T01 |                                                                        |
| maker-6-augustus-gene-244.0-mRNA-1  | Japonica | NA       |           | Os06g0611000 | OsR498G0612924700.01.T01 | 65-kDa microtubule-associated protein 1                                |
| maker-6-augustus-gene-244.14-mRNA-1 | Japonica | NA       |           | Os06g0612300 |                          | TRANSPARENT TESTA 1 protein, putative                                  |
| maker-6-augustus-gene-244.16-mRNA-1 | Japonica | NA       |           |              | OsR498G0612925000.01.T01 | IQ-domain 33                                                           |
| maker-6-augustus-gene-244.19-mRNA-1 | Japonica | NA       |           |              | OsR498G0612925600.01.T01 |                                                                        |
| maker-6-augustus-gene-244.21-mRNA-1 | Japonica | NA       |           | Os01g0711800 | OsR498G0612927600.01.T02 | Nucleosome assembly protein 1                                          |
| maker-6-augustus-gene-244.24-mRNA-1 | Japonica | NA       |           | Os01g0711400 | OsR498G0612928200.01.T02 | Glycine dehydrogenase (aminomethyl-transferring)                       |
| maker-6-augustus-gene-244.3-mRNA-1  | Japonica | NA       |           | Os06g0611400 | OsR498G0612926500.01.T01 | Exopolygalacturonase-like                                              |
| maker-6-augustus-gene-244.5-mRNA-1  | Japonica | NA       |           | Os06g0611500 | OsR498G0612926900.01.T01 | Group 13 grass pollen allergen (Fragment)                              |
| maker-6-augustus-gene-244.7-mRNA-1  | Japonica | Indica   |           | Os01g0712700 | OsR498G0612927300.01.T01 | Cytidine deaminase                                                     |



|                                     |          |          |               |              |                          |                                                                |
|-------------------------------------|----------|----------|---------------|--------------|--------------------------|----------------------------------------------------------------|
| maker-6-augustus-gene-244.8-mRNA-1  | Japonica | NA       |               |              |                          | DNA-directed RNA polymerase subunit                            |
| maker-6-augustus-gene-245.38-mRNA-1 | Japonica | NA       |               | Os06g0613400 | OsR498G0612934500.01.T01 | Gamma response gene 1                                          |
| maker-6-augustus-gene-245.40-mRNA-1 | Japonica | NA       |               | Os06g0613800 | OsR498G0612936500.01.T02 |                                                                |
| maker-6-augustus-gene-245.45-mRNA-1 | Japonica | Japonica |               | Os06g0612900 | OsR498G0612933600.01.T02 |                                                                |
| maker-6-augustus-gene-245.50-mRNA-1 | Japonica | NA       |               |              | OsR498G0612933800.01.T01 | AbfB domain-containing protein                                 |
| maker-6-augustus-gene-245.54-mRNA-1 | Japonica | Japonica |               | Os06g0613100 | OsR498G0612934200.01.T01 | Pentatricopeptide repeat-containing protein mitochondrial-like |
| maker-6-augustus-gene-245.57-mRNA-1 | Japonica | NA       |               |              | OsR498G0612935600.01.T01 | Transcription factor bHLH48 isoform A                          |
| maker-6-augustus-gene-245.63-mRNA-1 | Japonica | NA       |               | Os06g0613600 | OsR498G0612935800.01.T01 | 3,9-dihydroxypterocarpan 6A-monooxygenase                      |
| maker-6-augustus-gene-246.28-mRNA-1 | Japonica | NA       |               | Os06g0614300 | OsR498G0612938100.01.T03 | TBCC domain-containing protein 1                               |
| maker-6-augustus-gene-246.34-mRNA-1 | Japonica | NA       |               | Os06g0614100 | OsR498G0612937400.01.T01 | Transcription factor TGAL11                                    |
| maker-6-augustus-gene-247.27-mRNA-1 | Japonica | NA       |               | Os01g0346501 |                          | Transposon protein, putative, CACTA, En/Spm sub-class          |
| maker-6-augustus-gene-248.0-mRNA-1  | Japonica | NA       |               | Os06g0618000 | OsR498G0612959500.01.T01 | Elongation factor Ts, mitochondrial                            |
| maker-6-augustus-gene-248.10-mRNA-1 | Japonica | Indica   |               | Os06g0617800 | OsR498G0612958800.01.T01 | Ribose-phosphate diphosphokinase                               |
| maker-6-augustus-gene-248.15-mRNA-1 | Japonica | NA       |               | Os06g0618100 | OsR498G0612959800.01.T01 | C3H-type transcription factor (Fragment)                       |
| maker-6-augustus-gene-248.17-mRNA-1 | Japonica | NA       |               |              | OsR498G0612960000.01.T02 | Protein N-terminal asparagine amidohydrolase                   |
| maker-6-augustus-gene-248.2-mRNA-1  | Japonica | NA       |               |              | OsR498G0612960300.01.T01 | Transmembrane protein, putative                                |
| maker-6-augustus-gene-248.4-mRNA-1  | Japonica | Indica   |               | Os06g0618600 | OsR498G0612960500.01.T04 | Reduced growth phenotype protein 1                             |
| maker-6-augustus-gene-249.57-mRNA-1 | Japonica | Japonica | NBS-TM        | Os06g0619000 | OsR498G0612961500.01.T01 | Putative disease resistance protein RGA3                       |
| maker-6-augustus-gene-249.59-mRNA-1 | Japonica | NA       |               | Os06g0620600 | OsR498G0612964900.01.T01 | Integral membrane HRF1 family protein                          |
| maker-6-augustus-gene-249.63-mRNA-1 | Japonica | Japonica | LRR-TM        | Os06g0621500 | OsR498G0612965800.01.T01 | NAF domain-containing protein                                  |
| maker-6-augustus-gene-250.30-mRNA-1 | Japonica | NA       |               | Os06g0621900 | OsR498G0612967500.01.T01 | Expansin                                                       |
| maker-6-augustus-gene-250.32-mRNA-1 | Japonica | NA       |               | Os06g0622300 | OsR498G0612968500.01.T02 | AT-rich interactive domain-containing protein 3                |
| maker-6-augustus-gene-250.36-mRNA-1 | Japonica | NA       |               | Os06g0622700 | OsR498G0612970100.01.T01 | BZIP transcription factor                                      |
| maker-6-augustus-gene-250.39-mRNA-1 | Japonica | NA       |               |              | OsR498G0612970500.01.T05 | SEC7 domain-containing protein                                 |
| maker-6-augustus-gene-250.44-mRNA-1 | Japonica | NA       | LRR-TM        | Os06g0621500 |                          | Putative disease resistance RPP13-like protein 1               |
| maker-6-augustus-gene-250.46-mRNA-1 | Japonica | NA       |               | Os06g0622000 |                          | CW-type domain-containing protein                              |
| maker-6-augustus-gene-250.55-mRNA-1 | Japonica | NA       |               |              | OsR498G0612969400.01.T05 | Cell division cycle protein B                                  |
| maker-6-augustus-gene-251.30-mRNA-1 | Japonica | NA       |               | Os06g0624100 | OsR498G0612975700.01.T01 | Subtilisin-like serine protease                                |
| maker-6-augustus-gene-251.35-mRNA-1 | Japonica | Indica   |               | Os06g0624700 | OsR498G0612976300.01.T01 | Glycosyltransferase family 92 protein (Fragment)               |
| maker-6-augustus-gene-251.37-mRNA-1 | Japonica | NA       |               | Os06g0622900 | OsR498G0612970800.01.T06 | RRM domain-containing protein                                  |
| maker-6-augustus-gene-251.42-mRNA-1 | Japonica | NA       |               |              | OsR498G0612971600.01.T01 | NAD-dependent epimerase/dehydratase                            |
| maker-6-augustus-gene-251.44-mRNA-1 | Japonica | NA       |               | Os06g0623200 | OsR498G0612971600.01.T02 | Dihydroflavonol-4-reductase                                    |
| maker-6-augustus-gene-251.46-mRNA-1 | Japonica | NA       |               | Os06g0623300 | OsR498G0612971800.01.T01 | Epimerase domain-containing protein                            |
| maker-6-augustus-gene-251.51-mRNA-1 | Japonica | NA       |               | Os06g0623600 | OsR498G0612972800.01.T02 | Epimerase domain-containing protein                            |
| maker-6-augustus-gene-252.13-mRNA-1 | Japonica | NA       |               | Os06g0625900 | OsR498G0612983000.01.T01 | Potassium transporter                                          |
| maker-6-augustus-gene-252.2-mRNA-1  | Japonica | Indica   |               | Os02g0192500 | OsR498G0612982500.01.T02 | Glucomannan 4-beta-mannosyltransferase                         |
| maker-6-augustus-gene-254.17-mRNA-1 | Japonica | Indica   |               | Os04g0483700 | OsR498G0612992800.01.T01 | J domain-containing protein                                    |
| maker-6-augustus-gene-255.0-mRNA-1  | Japonica | NA       |               | Os03g0168000 | OsR498G0612996700.01.T01 | Sugar transport protein-like                                   |
| maker-6-augustus-gene-255.4-mRNA-1  | Japonica | Indica   |               | Os10g0330600 | OsR498G0612997600.01.T01 | Beta-galactosidase 14                                          |
| maker-6-augustus-gene-256.2-mRNA-1  | Japonica | Japonica |               | Os06g0630300 | OsR498G0613010200.01.T01 | Selenocysteine methyltransferase-like isoform X1               |
| maker-6-augustus-gene-258.33-mRNA-1 | Japonica | NA       |               | Os06g0633800 | OsR498G0613017700.01.T02 | Sodium-coupled neutral amino acid transporter 1                |
| maker-6-augustus-gene-258.40-mRNA-1 | Japonica | NA       |               |              | OsR498G0613018900.01.T01 |                                                                |
| maker-6-augustus-gene-258.42-mRNA-1 | Japonica | NA       |               | Os06g0634200 |                          | WIYLD domain-containing protein                                |
| maker-6-augustus-gene-258.47-mRNA-1 | Japonica | NA       |               | Os06g0633300 |                          | Phytosulfokines 1                                              |
| maker-6-augustus-gene-258.49-mRNA-1 | Japonica | NA       |               | Os06g0634100 |                          | nuclear intron maturase 4, mitochondrial                       |
| maker-6-augustus-gene-259.0-mRNA-1  | Japonica | NA       |               |              | OsR498G0613020500.01.T01 | UDP-glucose-fructose-phosphate glucosyltransferase             |
| maker-6-augustus-gene-259.17-mRNA-1 | Japonica | NA       |               | Os06g0634600 | OsR498G0613020400.01.T02 | Plant UBX domain-containing protein 4                          |
| maker-6-augustus-gene-259.2-mRNA-1  | Japonica | NA       |               | Os01g0823000 |                          |                                                                |
| maker-6-augustus-gene-259.20-mRNA-1 | Japonica | NA       |               | Os06g0635200 | OsR498G0613021200.01.T01 | Extracellular ligand-gated ion channel                         |
| maker-6-augustus-gene-259.22-mRNA-1 | Japonica | NA       |               |              | OsR498G0613022200.01.T01 | Myzus persicae-induced lipase 1                                |
| maker-6-augustus-gene-259.27-mRNA-1 | Japonica | Japonica |               | Os06g0635500 | OsR498G0613022800.01.T01 | Glutathione S-transferase T3-like                              |
| maker-6-augustus-gene-259.9-mRNA-1  | Japonica | Indica   | Kinase-LRR-TM | Os02g0190500 | OsR498G0613020200.01.T02 | Putative STRUBBELUG family receptor protein kinase             |
| maker-6-augustus-gene-260.30-mRNA-1 | Japonica | NA       |               |              | OsR498G0613024300.01.T01 | AvrRpt-cleavage domain-containing protein                      |
| maker-6-augustus-gene-260.32-mRNA-1 | Japonica | NA       | Kinase        | Os06g0636600 | OsR498G0613026300.01.T03 | Serine/threonine-protein kinase                                |
| maker-6-augustus-gene-260.36-mRNA-1 | Japonica | NA       |               | Os06g0636700 | OsR498G0613026600.01.T01 | GDSL esterase/lipase                                           |
| maker-6-augustus-gene-261.38-mRNA-1 | Japonica | NA       |               |              |                          | Zinc finger (CCCH-type) protein-like                           |
| maker-6-augustus-gene-261.44-mRNA-1 | Japonica | Indica   |               | Os06g0638200 | OsR498G0613032100.01.T01 | UPF0047 protein YjbQ                                           |
| maker-6-augustus-gene-261.49-mRNA-1 | Japonica | NA       |               |              |                          | Exostosin domain-containing protein (Fragment)                 |
| maker-6-augustus-gene-261.60-mRNA-1 | Japonica | NA       |               | Os06g0638100 | OsR498G0613031800.01.T01 | Protein TIC 21, chloroplastic isoform A                        |
| maker-6-augustus-gene-261.62-mRNA-1 | Japonica | NA       | Kinase-LRR-TM |              | OsR498G0613032800.01.T01 | Leucine-rich repeat protein kinase family protein isoform 2    |
| maker-6-augustus-gene-261.64-mRNA-1 | Japonica | NA       |               | Os06g0638700 | OsR498G0613033400.01.T04 | Cyclase-like protein 2 isoform A                               |

|                                     |          |        |           |              |                          |                                                                |
|-------------------------------------|----------|--------|-----------|--------------|--------------------------|----------------------------------------------------------------|
| maker-6-augustus-gene-261.68-mRNA-1 | Japonica | NA     |           |              | OsR498G0613033600.01.T01 | Calcium-binding protein-like                                   |
| maker-6-augustus-gene-261.71-mRNA-1 | Japonica | NA     |           |              |                          | E3 ubiquitin-protein ligase march6-like protein (Fragment)     |
| maker-6-augustus-gene-261.76-mRNA-1 | Japonica | NA     |           |              | OsR498G0613034000.01.T02 | Floral homeotic protein like                                   |
| maker-6-augustus-gene-261.82-mRNA-1 | Japonica | NA     |           | Os06g0639600 | OsR498G0613037000.01.T02 | Elongator component                                            |
| maker-6-augustus-gene-262.42-mRNA-1 | Japonica | NA     |           | Os06g0639800 | OsR498G0613037900.01.T01 | Premnaspirodiene oxygenase                                     |
| maker-6-augustus-gene-262.43-mRNA-1 | Japonica | Indica |           | Os06g0639800 | OsR498G0613038100.01.T01 | Premnaspirodiene oxygenase                                     |
| maker-6-augustus-gene-265.57-mRNA-1 | Japonica | NA     |           |              | OsR498G0613055400.01.T06 | Transcription initiation factor TFIID subunit 1                |
| maker-6-augustus-gene-265.61-mRNA-1 | Japonica | NA     |           | Os06g0646000 | OsR498G0613055600.01.T01 | Methyltransferase-like                                         |
| maker-6-augustus-gene-268.31-mRNA-1 | Japonica | NA     |           | Os06g0651600 | OsR498G0613075200.01.T03 | Protein-serine/threonine phosphatase                           |
| maker-6-augustus-gene-276.53-mRNA-1 | Japonica | NA     |           | Os06g0664800 | OsR498G0613123100.01.T01 | Octamer-binding transcription factor                           |
| maker-6-augustus-gene-278.60-mRNA-1 | Japonica | NA     |           | Os11g0205500 | OsR498G1119581200.01.T01 |                                                                |
| maker-6-augustus-gene-28.44-mRNA-1  | Japonica | NA     |           |              | OsR498G0611642400.01.T01 | VWFA domain-containing protein                                 |
| maker-6-augustus-gene-288.13-mRNA-1 | Japonica | NA     |           | Os06g0687600 | OsR498G0613211900.01.T02 | Protein IRREGULAR XYLEM 15                                     |
| maker-6-augustus-gene-288.15-mRNA-1 | Japonica | NA     |           | Os06g0687800 | OsR498G0613212500.01.T03 | EH domain-containing protein 1                                 |
| maker-6-augustus-gene-288.19-mRNA-1 | Japonica | NA     |           |              | OsR498G0613212900.01.T01 | Glycosyltransferases                                           |
| maker-6-augustus-gene-288.2-mRNA-1  | Japonica | Indica |           | Os06g0686400 | OsR498G0613207700.01.T01 | AAI domain-containing protein (Fragment)                       |
| maker-6-augustus-gene-288.24-mRNA-1 | Japonica | Indica |           | Os02g0158800 | OsR498G0613210800.01.T02 | O-fucosyltransferase family protein (Fragment)                 |
| maker-6-augustus-gene-288.3-mRNA-1  | Japonica | NA     |           |              |                          | Putative mitochondrial intermediate peptidase mitochondrial    |
| maker-6-augustus-gene-288.30-mRNA-1 | Japonica | NA     |           |              | OsR498G0613211000.01.T02 | Putative methyltransferase PMT9                                |
| maker-6-augustus-gene-288.33-mRNA-1 | Japonica | Indica |           | Os06g0687700 | OsR498G0613212200.01.T01 | T-complex protein 1 subunit eta                                |
| maker-6-augustus-gene-288.8-mRNA-1  | Japonica | NA     |           |              | OsR498G0613211300.01.T02 | U2 small nuclear ribonucleoprotein B                           |
| maker-6-augustus-gene-289.52-mRNA-1 | Japonica | NA     |           | Os06g0688100 | OsR498G0613211300.01.T02 | RNA polymerase I-specific transcription initiation factor RRN3 |
| maker-6-augustus-gene-289.65-mRNA-1 | Japonica | NA     |           |              | OsR498G0613214400.01.T02 | Cysteine-rich receptor-like protein kinase 10 isoform X1       |
| maker-6-augustus-gene-289.68-mRNA-1 | Japonica | Indica | Kinase-TM | Os06g0693000 | OsR498G0613215600.01.T01 | Cysteine-rich receptor-like protein kinase 19                  |
| maker-6-augustus-gene-289.74-mRNA-1 | Japonica | NA     |           | Os06g0690700 | OsR498G0613217600.01.T01 | Chloroplast heavy metal P-type ATPase                          |
| maker-6-augustus-gene-290.0-mRNA-1  | Japonica | NA     |           | Os06g0691000 | OsR498G0613218600.01.T01 | DNA repair protein REV1                                        |
| maker-6-augustus-gene-290.5-mRNA-1  | Japonica | NA     |           | Os06g0691400 | OsR498G0613219600.01.T01 | IAA-amino acid hydrolase                                       |
| maker-6-augustus-gene-291.44-mRNA-1 | Japonica | NA     | Kinase-TM | Os06g0693000 | OsR498G0613226300.01.T03 | Cysteine-rich receptor-like protein kinase 19                  |
| maker-6-augustus-gene-291.52-mRNA-1 | Japonica | NA     |           |              |                          |                                                                |
| maker-6-augustus-gene-291.54-mRNA-1 | Japonica | NA     |           | Os06g0693500 | OsR498G0613228100.01.T01 | Cytoplasmic 60S subunit biogenesis factor REI1 homolog 1       |
| maker-6-augustus-gene-291.57-mRNA-1 | Japonica | NA     |           |              | OsR498G0613228300.01.T05 |                                                                |
| maker-6-augustus-gene-291.61-mRNA-1 | Japonica | NA     | Kinase    | Os06g0693900 |                          | Cyclin dependent protein kinase                                |
| maker-6-augustus-gene-291.63-mRNA-1 | Japonica | NA     |           | Os06g0694100 | OsR498G0613229300.01.T02 | Tel2 interacting protein 2                                     |
| maker-6-augustus-gene-291.66-mRNA-1 | Japonica | NA     |           | Os06g0694500 | OsR498G0613230500.01.T01 | NFU domain protein 3 isoform 6                                 |
| maker-6-augustus-gene-291.69-mRNA-1 | Japonica | NA     | LRR-TM    | Os06g0692700 | OsR498G0613225200.01.T03 | Tyrosine-sulfated glycopeptide receptor 1                      |
| maker-6-augustus-gene-291.71-mRNA-1 | Japonica | NA     |           | Os06g0692800 | OsR498G0613225600.01.T02 | Ternary complex factor MIP1-like                               |
| maker-6-augustus-gene-291.76-mRNA-1 | Japonica | NA     |           |              | OsR498G0613227800.01.T03 | Replication factor A protein 2                                 |
| maker-6-augustus-gene-291.81-mRNA-1 | Japonica | NA     |           | Os06g0694000 | OsR498G0613229200.01.T02 | Adagio-like protein 1                                          |
| maker-6-augustus-gene-291.83-mRNA-1 | Japonica | NA     |           | Os06g0694400 | OsR498G0613230200.01.T01 | DNA-binding WRKY                                               |
| maker-6-augustus-gene-291.85-mRNA-1 | Japonica | NA     |           | Os06g0694800 | OsR498G0613231400.01.T01 | La-related protein 6 isoform 1                                 |
| maker-6-augustus-gene-292.0-mRNA-1  | Japonica | NA     |           | Os06g0695200 | OsR498G0613232300.01.T01 | Peroxidase                                                     |
| maker-6-augustus-gene-292.2-mRNA-1  | Japonica | NA     |           | Os06g0695400 | OsR498G0613232700.01.T01 | Peroxidase                                                     |
| maker-6-augustus-gene-292.4-mRNA-1  | Japonica | NA     |           | Os06g0695500 | OsR498G0613233900.01.T01 | Peroxidase                                                     |
| maker-6-augustus-gene-292.6-mRNA-1  | Japonica | NA     |           | Os06g0695200 | OsR498G0613232600.01.T01 | Peroxidase                                                     |
| maker-6-augustus-gene-292.8-mRNA-1  | Japonica | NA     |           | Os06g0695600 | OsR498G0613234400.01.T01 | E3 ubiquitin-protein ligase Arkadia                            |
| maker-6-augustus-gene-293.39-mRNA-1 | Japonica | Indica |           | Os06g0696400 | OsR498G0613237300.01.T01 | Xyloglucan endotransglucosylase/hydrolase                      |
| maker-6-augustus-gene-293.43-mRNA-1 | Japonica | Indica |           | Os04g0604900 | OsR498G0613237900.01.T01 | Xyloglucan endotransglucosylase/hydrolase                      |
| maker-6-augustus-gene-293.45-mRNA-1 | Japonica | NA     |           | Os06g0696600 | OsR498G0613238700.01.T01 | Xyloglucan endotransglucosylase/hydrolase                      |
| maker-6-augustus-gene-296.33-mRNA-1 | Japonica | Indica |           | Os06g0701300 | OsR498G0613255000.01.T01 | Putative aarF domain-containing protein kinase                 |
| maker-6-augustus-gene-298.18-mRNA-1 | Japonica | Indica |           | Os06g0703800 | OsR498G0613267900.01.T01 | Chaperone binding,ATPase activators                            |
| maker-6-augustus-gene-299.69-mRNA-1 | Japonica | NA     |           |              |                          | Histone acetyltransferase                                      |
| maker-6-augustus-gene-3.32-mRNA-1   | Japonica | Indica |           | Os06g0103800 | OsR498G0611473500.01.T02 | Membrane protein of ER body 2                                  |
| maker-6-augustus-gene-3.36-mRNA-1   | Japonica | NA     |           |              |                          | AAI domain-containing protein (Fragment)                       |
| maker-6-augustus-gene-3.37-mRNA-1   | Japonica | NA     |           | Os06g0103900 | OsR498G0611474200.01.T02 | Methyltransferase                                              |
| maker-6-augustus-gene-3.39-mRNA-1   | Japonica | NA     |           | Os06g0104000 | OsR498G0611474400.01.T03 | Aminopeptidase                                                 |
| maker-6-augustus-gene-3.42-mRNA-1   | Japonica | NA     |           | Os06g0104200 | OsR498G0611474800.01.T01 | Secondary wall NAC master switch                               |
| maker-6-augustus-gene-3.44-mRNA-1   | Japonica | NA     |           | Os06g0104300 | OsR498G0611475400.01.T01 | Monocopper oxidase-like protein SKU5                           |
| maker-6-augustus-gene-3.47-mRNA-1   | Japonica | Indica |           | Os06g0104400 | OsR498G0611475800.01.T01 | BAG family molecular chaperone regulator 7                     |
| maker-6-augustus-gene-305.45-mRNA-1 | Japonica | NA     |           | Os06g0717600 | OsR498G0613309900.01.T01 | NEP1-interacting protein 1                                     |
| maker-6-augustus-gene-305.67-mRNA-1 | Japonica | NA     |           | Os06g0717800 | OsR498G0613310200.01.T01 | Protein-serine/threonine phosphatase                           |
| maker-6-augustus-gene-307.57-mRNA-1 | Japonica | Indica |           | Os06g0724800 | OsR498G0613327500.01.T01 | Transcription factor bHLH93                                    |

|                                    |          |          |              |              |                          |                                                                          |
|------------------------------------|----------|----------|--------------|--------------|--------------------------|--------------------------------------------------------------------------|
| maker-6-augustus-gene-32.7-mRNA-1  | Japonica | NA       |              | Os06g0161800 | OsR498G0611669500.01.T01 | DUF569 domain-containing protein                                         |
| maker-6-augustus-gene-35.62-mRNA-1 | Japonica | NA       |              | Os06g0168600 | OsR498G0611687800.01.T02 | Ribonucleoside-diphosphate reductase                                     |
| maker-6-augustus-gene-35.67-mRNA-1 | Japonica | NA       | Kinase-TM    | Os06g0168800 | OsR498G0611688600.01.T01 | Mitogen-activated protein kinase kinase                                  |
| maker-6-augustus-gene-36.10-mRNA-1 | Japonica | NA       |              |              | OsR498G0714849700.01.T01 | L10-interacting MYB domain-containing protein                            |
| maker-6-augustus-gene-36.20-mRNA-1 | Japonica | NA       |              |              |                          | DUF569 domain-containing protein                                         |
| maker-6-augustus-gene-36.5-mRNA-1  | Japonica | NA       |              | Os06g0161900 | OsR498G0611693600.01.T02 | DUF569 domain-containing protein                                         |
| maker-6-augustus-gene-37.14-mRNA-1 | Japonica | Indica   |              | Os06g0161900 | OsR498G0204888100.01.T01 | DUF569 domain-containing protein                                         |
| maker-6-augustus-gene-37.18-mRNA-1 | Japonica | NA       |              | Os06g0171900 | OsR498G0611698300.01.T03 | WD repeat containing protein                                             |
| maker-6-augustus-gene-37.22-mRNA-1 | Japonica | NA       |              | Os06g0172000 | OsR498G0611698500.01.T01 | Pentatricopeptide repeat-containing protein chloroplastic                |
| maker-6-augustus-gene-37.24-mRNA-1 | Japonica | NA       |              |              | OsR498G0611699500.01.T01 | Fertility restorer-like                                                  |
| maker-6-augustus-gene-37.26-mRNA-1 | Japonica | Indica   |              | Os06g0172600 | OsR498G0611699900.01.T01 |                                                                          |
| maker-6-augustus-gene-37.32-mRNA-1 | Japonica | NA       |              |              |                          | Fanconi-associated nuclease                                              |
| maker-6-augustus-gene-4.38-mRNA-1  | Japonica | NA       |              | Os06g0105500 | OsR498G0611478100.01.T01 | Protein arginine N-methyltransferase                                     |
| maker-6-augustus-gene-4.44-mRNA-1  | Japonica | NA       |              | Os06g0105900 | OsR498G0611479500.01.T03 | Chorismate synthase                                                      |
| maker-6-augustus-gene-4.49-mRNA-1  | Japonica | NA       |              | Os06g0106000 | OsR498G0611479700.01.T01 | Septum site-determining protein minD like, chloroplastic                 |
| maker-6-augustus-gene-4.51-mRNA-1  | Japonica | NA       |              |              |                          |                                                                          |
| maker-6-augustus-gene-4.53-mRNA-1  | Japonica | Indica   |              | Os06g0107000 | OsR498G0611482700.01.T01 | DUF862 domain-containing protein                                         |
| maker-6-augustus-gene-4.56-mRNA-1  | Japonica | Indica   |              | Os06g0107100 | OsR498G0611482900.01.T01 | Putative membrane protein Yjcl                                           |
| maker-6-augustus-gene-4.66-mRNA-1  | Japonica | NA       |              |              | OsR498G0611478600.01.T02 | Protein transport protein sec16                                          |
| maker-6-augustus-gene-4.71-mRNA-1  | Japonica | NA       |              | Os06g0105700 | OsR498G0611478800.01.T02 | SANT domain-containing protein                                           |
| maker-6-augustus-gene-4.75-mRNA-1  | Japonica | NA       |              | Os06g0105800 | OsR498G0611479000.01.T02 | HTH myb-type domain-containing protein (Fragment)                        |
| maker-6-augustus-gene-4.82-mRNA-1  | Japonica | NA       |              |              |                          |                                                                          |
| maker-6-augustus-gene-4.85-mRNA-1  | Japonica | NA       |              | Os06g0106800 | OsR498G0611482000.01.T01 | probable polygalacturonase                                               |
| maker-6-augustus-gene-41.33-mRNA-1 | Japonica | NA       |              | Os06g0182400 | OsR498G0611729300.01.T06 | Metallophos domain-containing protein                                    |
| maker-6-augustus-gene-41.37-mRNA-1 | Japonica | NA       |              | Os06g0182500 | OsR498G0611729500.01.T03 | LIM domain-containing protein isoform 1                                  |
| maker-6-augustus-gene-41.44-mRNA-1 | Japonica | Japonica |              | Os06g0182100 | OsR498G0611728600.01.T01 | DUF862 domain-containing protein (Fragment)                              |
| maker-6-augustus-gene-41.46-mRNA-1 | Japonica | NA       |              |              | OsR498G0611729000.01.T01 | 1,3-beta-glucan synthase                                                 |
| maker-6-augustus-gene-42.22-mRNA-1 | Japonica | NA       |              | Os06g0184300 | OsR498G0611735600.01.T01 | Ubiquitin carboxyl-terminal hydrolase                                    |
| maker-6-augustus-gene-42.3-mRNA-1  | Japonica | NA       |              |              | OsR498G0611732400.01.T01 | Sensor protein gacS                                                      |
| maker-6-augustus-gene-45.0-mRNA-1  | Japonica | NA       |              | Os06g0187900 | OsR498G0611747100.01.T08 | Serine/arginine-rich splicing factor 7                                   |
| maker-6-augustus-gene-45.16-mRNA-1 | Japonica | NA       |              |              | OsR498G0611748000.01.T01 | Glutamate receptor                                                       |
| maker-6-augustus-gene-45.19-mRNA-1 | Japonica | NA       |              |              |                          | Ionotropic glutamate receptor                                            |
| maker-6-augustus-gene-46.21-mRNA-1 | Japonica | NA       |              |              |                          | PBPc domain-containing protein                                           |
| maker-6-augustus-gene-46.23-mRNA-1 | Japonica | NA       |              | Os06g0190700 | OsR498G0611753200.01.T01 | PBPc domain-containing protein (Fragment)                                |
| maker-6-augustus-gene-47.42-mRNA-1 | Japonica | Japonica |              | Os06g0191200 | OsR498G0611754700.01.T01 | DNA-dependent metalloprotease                                            |
| maker-6-augustus-gene-47.44-mRNA-1 | Japonica | NA       |              | Os06g0191700 | OsR498G0611757300.01.T01 | Secologanin synthase                                                     |
| maker-6-augustus-gene-47.46-mRNA-1 | Japonica | NA       |              | Os06g0192100 | OsR498G0611758700.01.T01 | Glycosyltransferase                                                      |
| maker-6-augustus-gene-47.48-mRNA-1 | Japonica | NA       |              |              | OsR498G0611759700.01.T02 | Pre-mRNA-splicing factor ATP-dependent RNA helicase DEAH10               |
| maker-6-augustus-gene-47.52-mRNA-1 | Japonica | NA       |              | Os06g0192600 | OsR498G0611759900.01.T01 | 26S protease regulatory subunit 7 homolog A                              |
| maker-6-augustus-gene-47.57-mRNA-1 | Japonica | NA       |              | Os06g0190700 | OsR498G0611753200.01.T01 | PBPc domain-containing protein (Fragment)                                |
| maker-6-augustus-gene-47.60-mRNA-1 | Japonica | NA       |              | Os06g0190800 | OsR498G0611753600.01.T01 | Glutamate receptor                                                       |
| maker-6-augustus-gene-47.62-mRNA-1 | Japonica | NA       |              | Os06g0191800 | OsR498G0611757600.01.T01 | Secologanin synthase                                                     |
| maker-6-augustus-gene-47.64-mRNA-1 | Japonica | Indica   | CC-Kinase-TM | Os02g0787200 | OsR498G0611757800.01.T01 | U-box domain-containing protein 35-like isoform X2                       |
| maker-6-augustus-gene-47.67-mRNA-1 | Japonica | NA       |              | Os06g0192400 | OsR498G0611759200.01.T01 | Hexosyltransferase                                                       |
| maker-6-augustus-gene-48.32-mRNA-1 | Japonica | NA       |              | Os06g0192900 | OsR498G0611762100.01.T02 | Lysine-ketoglutarate reductase/saccharopine dehydrogenase bifunctional e |
| maker-6-augustus-gene-48.36-mRNA-1 | Japonica | NA       |              | Os06g0194000 | OsR498G0611765100.01.T01 | EREBP transcription factor                                               |
| maker-6-augustus-gene-48.38-mRNA-1 | Japonica | NA       |              | Os06g0194400 | OsR498G0611769500.01.T01 | TF-B3 domain-containing protein (Fragment)                               |
| maker-6-augustus-gene-48.42-mRNA-1 | Japonica | NA       |              | Os06g0193000 | OsR498G0611762600.01.T01 | UBC core domain-containing protein (Fragment)                            |
| maker-6-augustus-gene-48.46-mRNA-1 | Japonica | NA       |              | Os06g0193300 | OsR498G0611763000.01.T01 | Myophilin like                                                           |
| maker-6-augustus-gene-48.49-mRNA-1 | Japonica | NA       |              | Os06g0193400 | OsR498G0611763200.01.T03 | Transcription factor bHLH82                                              |
| maker-6-augustus-gene-49.4-mRNA-1  | Japonica | NA       |              | Os06g0194900 | OsR498G0611772600.01.T05 | Sucrose synthase                                                         |
| maker-6-augustus-gene-5.52-mRNA-1  | Japonica | Indica   |              | Os06g0107600 | OsR498G0611484500.01.T02 | Auxin-induced protein 5NG4                                               |
| maker-6-augustus-gene-5.56-mRNA-1  | Japonica | NA       |              |              | OsR498G0611486100.01.T05 | MADS-box domain-containing protein                                       |
| maker-6-augustus-gene-5.64-mRNA-1  | Japonica | NA       |              | Os06g0108900 | OsR498G0611487900.01.T01 | Bell-like homeodomain protein (Fragment)                                 |
| maker-6-augustus-gene-5.69-mRNA-1  | Japonica | NA       |              | Os06g0109200 | OsR498G0611490100.01.T01 |                                                                          |
| maker-6-augustus-gene-5.72-mRNA-1  | Japonica | NA       |              | Os06g0109300 | OsR498G0611490300.01.T01 | Auxin-induced protein 5NG4                                               |
| maker-6-augustus-gene-5.75-mRNA-1  | Japonica | NA       | NBS-TM       | Os06g0109400 | OsR498G0611490500.01.T01 | Cell division control protein C                                          |
| maker-6-augustus-gene-5.78-mRNA-1  | Japonica | NA       |              | Os06g0107700 | OsR498G0611484800.01.T01 | Ferredoxin--NADP reductase, chloroplastic                                |
| maker-6-augustus-gene-5.82-mRNA-1  | Japonica | Japonica |              | Os03g0596800 | OsR498G0611486000.01.T01 | TF-B3 domain-containing protein                                          |
| maker-6-augustus-gene-5.85-mRNA-1  | Japonica | Indica   |              | Os01g0274500 | OsR498G0611486400.01.T01 | Expansin                                                                 |
| maker-6-augustus-gene-5.87-mRNA-1  | Japonica | Japonica |              | Os06g0109100 | OsR498G0611488400.01.T02 | RING-H2 zinc finger protein RHA1a                                        |

|                                    |          |          |           |              |                          |                                                                |
|------------------------------------|----------|----------|-----------|--------------|--------------------------|----------------------------------------------------------------|
| maker-6-augustus-gene-52.50-mRNA-1 | Japonica | NA       | Kinase-TM | Os06g0202900 | OsR498G0611804800.01.T01 | Serinethreonine-protein kinase                                 |
| maker-6-augustus-gene-57.0-mRNA-1  | Japonica | NA       |           |              | OsR498G0611835900.01.T01 |                                                                |
| maker-6-augustus-gene-6.36-mRNA-1  | Japonica | Indica   |           | Os06g0109600 | OsR498G0611491500.01.T02 | Adenylate kinase                                               |
| maker-6-augustus-gene-6.42-mRNA-1  | Japonica | NA       |           | Os06g0110000 | OsR498G0611493500.01.T01 | Ent-kaurenoic acid oxidase                                     |
| maker-6-augustus-gene-6.45-mRNA-1  | Japonica | NA       |           | Os06g0110100 | OsR498G0611493700.01.T01 | Protein-tyrosine-phosphatase                                   |
| maker-6-augustus-gene-6.49-mRNA-1  | Japonica | NA       |           |              |                          | Putative acyl-activating enzyme 19                             |
| maker-6-augustus-gene-6.58-mRNA-1  | Japonica | Indica   |           | Os06g0111300 | OsR498G0611495800.01.T01 | Pentatricopeptide (PPR) repeat-containing protein-like         |
| maker-6-augustus-gene-6.65-mRNA-1  | Japonica | NA       |           | Os06g0111400 | OsR498G0611496000.01.T01 | Guanine nucleotide-binding protein alpha-2 subunit             |
| maker-6-augustus-gene-65.0-mRNA-1  | Japonica | NA       |           | Os06g0223300 | OsR498G0611883700.01.T01 | MADS-box protein AGL66                                         |
| maker-6-augustus-gene-65.5-mRNA-1  | Japonica | NA       |           | Os06g0222900 | OsR498G0611882800.01.T02 | IPPC domain-containing protein (Fragment)                      |
| maker-6-augustus-gene-66.6-mRNA-1  | Japonica | NA       |           | Os06g0223700 | OsR498G0611885200.01.T01 | FLZ-type domain-containing protein (Fragment)                  |
| maker-6-augustus-gene-7.0-mRNA-1   | Japonica | NA       |           | Os06g0112200 | OsR498G0611500300.01.T01 | Methylthioadenosine/S-adenosyl homocysteine nucleosidase       |
| maker-6-augustus-gene-7.10-mRNA-1  | Japonica | NA       |           | Os06g0112700 | OsR498G0611501300.01.T01 | Transcription factor like                                      |
| maker-6-augustus-gene-7.13-mRNA-1  | Japonica | NA       |           | Os06g0111800 | OsR498G0611497000.01.T02 | Cellulose synthase                                             |
| maker-6-augustus-gene-7.15-mRNA-1  | Japonica | NA       |           | Os06g0112100 | OsR498G0611498800.01.T02 | Bark storage protein like                                      |
| maker-6-augustus-gene-7.19-mRNA-1  | Japonica | NA       |           |              | OsR498G0611502200.01.T01 | 1,3-beta-glucan synthase                                       |
| maker-6-augustus-gene-7.4-mRNA-1   | Japonica | NA       |           | Os06g0112300 | OsR498G0611500500.01.T01 | TF-B3 domain-containing protein (Fragment)                     |
| maker-6-augustus-gene-7.6-mRNA-1   | Japonica | NA       |           | Os06g0112400 | OsR498G0611500700.01.T02 | Binding partner of like (Fragment)                             |
| maker-6-augustus-gene-73.0-mRNA-1  | Japonica | NA       |           | Os06g0236300 | OsR498G0611960900.01.T01 | Protein-serine/threonine phosphatase                           |
| maker-6-augustus-gene-73.10-mRNA-1 | Japonica | NA       |           | Os06g0236600 | OsR498G0611962200.01.T01 | Cyclin N-terminal domain-containing protein (Fragment)         |
| maker-6-augustus-gene-73.13-mRNA-1 | Japonica | NA       |           |              | OsR498G0611963200.01.T01 | Ankyrin repeat domain-containing protein, chloroplastic        |
| maker-6-augustus-gene-73.15-mRNA-1 | Japonica | NA       |           | Os06g0237200 | OsR498G0611964000.01.T03 | DNA polymerase lambda                                          |
| maker-6-augustus-gene-73.2-mRNA-1  | Japonica | NA       |           |              | OsR498G0611962900.01.T03 | tRNA (guanine-N(7))-methyltransferase                          |
| maker-6-augustus-gene-73.20-mRNA-1 | Japonica | Japonica |           | Os06g0237300 | OsR498G0611964200.01.T01 | LIM zinc-binding domain-containing protein                     |
| maker-6-augustus-gene-73.24-mRNA-1 | Japonica | NA       |           |              | OsR498G0611964400.01.T01 | Xyloglucan endotransglucosylase/hydrolase                      |
| maker-6-augustus-gene-73.27-mRNA-1 | Japonica | NA       | LRR       |              | OsR498G0611964800.01.T03 | NLR family CARD domain-containing protein 3                    |
| maker-6-augustus-gene-73.30-mRNA-1 | Japonica | Indica   |           | Os02g0741100 | OsR498G0611965600.01.T01 | Chaperone protein dnaJ 16                                      |
| maker-6-augustus-gene-73.36-mRNA-1 | Japonica | NA       |           | Os06g0237900 | OsR498G0611966600.01.T02 | alpha-1,2-Mannosidase                                          |
| maker-6-augustus-gene-73.5-mRNA-1  | Japonica | NA       |           | Os06g0237100 | OsR498G0611963700.01.T01 | Thiol-disulfide oxidoreductase DCC                             |
| maker-6-augustus-gene-74.0-mRNA-1  | Japonica | NA       |           |              | OsR498G0611970100.01.T02 | Methyltransferase gidB, putative                               |
| maker-6-augustus-gene-74.14-mRNA-1 | Japonica | Indica   |           | Os06g0239700 | OsR498G0611972500.01.T02 | O-fucosyltransferase family protein                            |
| maker-6-augustus-gene-74.20-mRNA-1 | Japonica | Japonica |           | Os06g0238700 | OsR498G0611969400.01.T01 | F-box/WD repeat-containing protein sel-10-like                 |
| maker-6-augustus-gene-74.5-mRNA-1  | Japonica | NA       |           | Os06g0239500 | OsR498G0611971500.01.T01 | Amino acid permease, putative isoform 1                        |
| maker-6-augustus-gene-74.8-mRNA-1  | Japonica | NA       |           |              | OsR498G0611972300.01.T02 | O-fucosyltransferase family protein (Fragment)                 |
| maker-6-augustus-gene-75.33-mRNA-1 | Japonica | Japonica |           | Os06g0240900 | OsR498G0611973800.01.T01 | Anthranilate O-methyltransferase 1                             |
| maker-6-augustus-gene-75.37-mRNA-1 | Japonica | NA       | Kinase-TM | Os06g0241100 | OsR498G0713492600.01.T02 | G-type lectin S-receptor-like serine/threonine-protein kinase  |
| maker-6-augustus-gene-75.39-mRNA-1 | Japonica | NA       |           |              | OsR498G0611974000.01.T01 | Benzoate carboxyl methyltransferase                            |
| maker-6-augustus-gene-75.41-mRNA-1 | Japonica | NA       |           |              | OsR498G0611974200.01.T01 | Inactive anthranilate O-methyltransferase 1                    |
| maker-6-augustus-gene-76.26-mRNA-1 | Japonica | NA       |           | Os10g0399700 |                          | Cystathionine gamma-synthase, chloroplastic                    |
| maker-6-augustus-gene-76.28-mRNA-1 | Japonica | Indica   |           | Os06g0240900 | OsR498G0611977000.01.T01 | Benzoate carboxyl methyltransferase                            |
| maker-6-augustus-gene-76.31-mRNA-1 | Japonica | NA       |           |              | OsR498G0611977800.01.T01 | Anthranilate O-methyltransferase 1                             |
| maker-6-augustus-gene-77.25-mRNA-1 | Japonica | NA       |           | Os06g0244100 | OsR498G0611981300.01.T04 |                                                                |
| maker-6-augustus-gene-77.34-mRNA-1 | Japonica | NA       |           | Os06g0244000 | OsR498G0611980400.01.T02 | Benzoate carboxyl methyltransferase                            |
| maker-6-augustus-gene-77.38-mRNA-1 | Japonica | Japonica |           | Os06g0244200 | OsR498G0611981600.01.T03 | RING-type domain-containing protein                            |
| maker-6-augustus-gene-79.35-mRNA-1 | Japonica | Indica   |           | Os06g0248400 | OsR498G0611999900.01.T02 | Poly [ADP-ribose] polymerase                                   |
| maker-6-augustus-gene-8.42-mRNA-1  | Japonica | Japonica |           | Os06g0113600 | OsR498G0611504100.01.T02 | DUF295 domain-containing protein                               |
| maker-6-augustus-gene-8.57-mRNA-1  | Japonica | NA       |           | Os06g0113500 | OsR498G0611504000.01.T01 | DUF295 domain-containing protein                               |
| maker-6-augustus-gene-8.58-mRNA-1  | Japonica | NA       |           | Os06g0113900 | OsR498G0611505200.01.T01 |                                                                |
| maker-6-augustus-gene-8.60-mRNA-1  | Japonica | Indica   |           | Os06g0113950 | OsR498G0611505600.01.T01 |                                                                |
| maker-6-augustus-gene-8.63-mRNA-1  | Japonica | NA       |           | Os06g0114000 | OsR498G0611505800.01.T02 | RuBisCO large subunit-binding protein subunit beta             |
| maker-6-augustus-gene-82.21-mRNA-1 | Japonica | NA       |           |              | OsR498G0612021100.01.T03 | Chromatin structure-remodeling complex protein SYD             |
| maker-6-augustus-gene-82.26-mRNA-1 | Japonica | NA       |           | Os06g0255300 | OsR498G0612021100.01.T01 | SnAC domain-containing protein                                 |
| maker-6-augustus-gene-82.38-mRNA-1 | Japonica | Japonica |           | Os06g0255000 | OsR498G0612020800.01.T03 | 2-oxoglutarate-dependent dioxygenase                           |
| maker-6-augustus-gene-82.40-mRNA-1 | Japonica | Japonica |           | Os06g0255100 | OsR498G0612021000.01.T01 | Fe2OG dioxygenase domain-containing protein                    |
| maker-6-augustus-gene-83.19-mRNA-1 | Japonica | NA       |           | Os06g0256800 | OsR498G0612029500.01.T01 | Signal recognition particle 19 kDa family protein              |
| maker-6-augustus-gene-83.26-mRNA-1 | Japonica | NA       |           | Os06g0256900 | OsR498G0612029800.01.T02 | Endoglucanase                                                  |
| maker-6-augustus-gene-83.30-mRNA-1 | Japonica | NA       |           |              | OsR498G0612031200.01.T02 | Signal recognition particle 9 kDa protein (Fragment)           |
| maker-6-augustus-gene-84.41-mRNA-1 | Japonica | NA       |           | Os06g0258000 | OsR498G0612033300.01.T01 | Myb factor                                                     |
| maker-6-augustus-gene-84.43-mRNA-1 | Japonica | NA       |           | Os06g0258900 | OsR498G0612038100.01.T01 | Ketose-bisphosphate aldolase class-II family protein isoform 1 |
| maker-6-augustus-gene-84.50-mRNA-1 | Japonica | NA       |           |              | OsR498G0612038400.01.T01 | 1-phosphatidylinositol-3-phosphate 5-kinase                    |
| maker-6-augustus-gene-85.0-mRNA-1  | Japonica | NA       |           | Os06g0260000 | OsR498G0612043200.01.T01 | Tify domain-containing protein                                 |

|                                     |          |          |           |              |                          |                                                                              |
|-------------------------------------|----------|----------|-----------|--------------|--------------------------|------------------------------------------------------------------------------|
| maker-6-augustus-gene-88.32-mRNA-1  | Japonica | NA       |           | Os06g0264300 | OsR498G0612055700.01.T01 | Ubiquitin receptor RAD23                                                     |
| maker-6-augustus-gene-88.38-mRNA-1  | Japonica | NA       |           | Os06g0264500 | OsR498G0612057700.01.T01 | Peptide transporter PTR5                                                     |
| maker-6-augustus-gene-88.41-mRNA-1  | Japonica | NA       |           | Os06g0264800 | OsR498G0612058800.01.T01 | CAAD domain-containing protein                                               |
| maker-6-augustus-gene-88.44-mRNA-1  | Japonica | NA       |           | Os06g0264900 | OsR498G0612059200.01.T03 | Carbon catabolite repressor protein 4 homolog 3                              |
| maker-6-augustus-gene-89.8-mRNA-1   | Japonica | Indica   |           | Os06g0265400 | OsR498G0612061600.01.T03 | BZIP transcription factor family protein isoform 1                           |
| maker-6-augustus-gene-90.26-mRNA-1  | Japonica | NA       |           |              | OsR498G0612065500.01.T02 | Autophagy 2                                                                  |
| maker-6-augustus-gene-92.10-mRNA-1  | Japonica | NA       |           | Os06g0273500 | OsR498G0612083900.01.T01 | Leaf senescence protein-like                                                 |
| maker-6-augustus-gene-92.8-mRNA-1   | Japonica | Japonica |           | Os06g0273200 | OsR498G0612083700.01.T01 | Leaf senescence protein-like                                                 |
| maker-6-augustus-gene-98.0-mRNA-1   | Japonica | NA       |           | Os06g0283200 | OsR498G0612142500.01.T01 | PHD and RING finger domain-containing protein 1                              |
| maker-6-augustus-gene-99.26-mRNA-1  | Japonica | NA       |           | Os06g0284800 | OsR498G0612148900.01.T01 | Movement protein binding protein 2C                                          |
| maker-6-augustus-gene-99.29-mRNA-1  | Japonica | NA       |           | Os06g0284200 | OsR498G0612146400.01.T03 | O-fucosyltransferase family protein                                          |
| maker-7-augustus-gene-101.32-mRNA-1 | Japonica | NA       |           |              |                          |                                                                              |
| maker-7-augustus-gene-101.36-mRNA-1 | Japonica | NA       |           |              | OsR498G0713989900.01.T01 | PlsC domain-containing protein                                               |
| maker-7-augustus-gene-102.37-mRNA-1 | Japonica | NA       |           | Os07g0280200 | OsR498G0713992100.01.T01 | 4-coumarate--CoA ligase-like 9                                               |
| maker-7-augustus-gene-103.36-mRNA-1 | Japonica | Indica   |           | Os07g0282300 | OsR498G0713994900.01.T01 | Aldehyde oxidase/xanthine dehydrogenase molybdopterin binding protein        |
| maker-7-augustus-gene-103.43-mRNA-1 | Japonica | NA       |           | Os07g0281000 | OsR498G0713993000.01.T01 | Zinc finger CCH domain-containing protein 4                                  |
| maker-7-augustus-gene-104.23-mRNA-1 | Japonica | NA       |           | Os07g0282300 | OsR498G0713994900.01.T01 | Aldehyde oxidase/xanthine dehydrogenase molybdopterin binding protein        |
| maker-7-augustus-gene-104.28-mRNA-1 | Japonica | NA       | Kinase-TM | Os07g0283125 | OsR498G0713999800.01.T01 | Putative receptor-type protein kinase LRK1                                   |
| maker-7-augustus-gene-104.29-mRNA-1 | Japonica | NA       |           | Os07g0283200 | OsR498G0713999800.01.T05 | Transmembrane isoform 2                                                      |
| maker-7-augustus-gene-106.28-mRNA-1 | Japonica | NA       |           | Os07g0285200 | OsR498G0714008000.01.T01 | FBD domain-containing protein (Fragment)                                     |
| maker-7-augustus-gene-106.30-mRNA-1 | Japonica | Indica   |           | Os07g0285700 | OsR498G0714008200.01.T01 | FBD domain-containing protein (Fragment)                                     |
| maker-7-augustus-gene-106.32-mRNA-1 | Japonica | Japonica |           | Os07g0285700 | OsR498G0714008400.01.T01 | FBD domain-containing protein (Fragment)                                     |
| maker-7-augustus-gene-106.34-mRNA-1 | Japonica | NA       |           | Os07g0286100 |                          | FBD domain-containing protein                                                |
| maker-7-augustus-gene-107.27-mRNA-1 | Japonica | NA       |           | Os07g0287000 | OsR498G0714014300.01.T02 | FBD domain-containing protein (Fragment)                                     |
| maker-7-augustus-gene-107.29-mRNA-1 | Japonica | NA       |           |              | OsR498G0714014500.01.T06 | Tetratricopeptide repeat (TPR)-like superfamily protein                      |
| maker-7-augustus-gene-107.30-mRNA-1 | Japonica | NA       |           | Os07g0287100 | OsR498G0714014500.01.T06 | Tetratricopeptide repeat-like superfamily protein isoform 2                  |
| maker-7-augustus-gene-107.43-mRNA-1 | Japonica | NA       |           | Os06g0357800 | OsR498G0408344700.01.T01 | Cell wall protein-like                                                       |
| maker-7-augustus-gene-107.44-mRNA-1 | Japonica | NA       |           | Os01g0719300 | OsR498G0101906500.01.T04 | STAS domain-containing protein (Fragment)                                    |
| maker-7-augustus-gene-108.0-mRNA-1  | Japonica | NA       |           |              | OsR498G0509629200.01.T01 |                                                                              |
| maker-7-augustus-gene-108.6-mRNA-1  | Japonica | NA       |           |              |                          | Ulp1 protease family, C-terminal catalytic domain containing protein, expres |
| maker-7-augustus-gene-108.8-mRNA-1  | Japonica | NA       |           |              | OsR498G0714022200.01.T01 |                                                                              |
| maker-7-augustus-gene-109.0-mRNA-1  | Japonica | NA       |           | Os07g0290800 | OsR498G0714024700.01.T01 | Chloroplast inner membrane import protein Tic22                              |
| maker-7-augustus-gene-109.11-mRNA-1 | Japonica | Indica   |           | Os07g0293000 | OsR498G0714029400.01.T01 | 4-hydroxyphenylacetaldehyde oxime monooxygenase                              |
| maker-7-augustus-gene-109.3-mRNA-1  | Japonica | NA       |           |              | OsR498G1120154400.01.T01 | Putative proteophosphoglycan ppg3                                            |
| maker-7-augustus-gene-109.9-mRNA-1  | Japonica | Indica   |           | Os03g0848400 | OsR498G0714026200.01.T01 | Endoplasmic reticulum transmembrane protein (Fragment)                       |
| maker-7-augustus-gene-110.0-mRNA-1  | Japonica | NA       |           | Os07g0292800 | OsR498G0714030900.01.T01 | TRASH domain-containing protein (Fragment)                                   |
| maker-7-augustus-gene-110.3-mRNA-1  | Japonica | Japonica |           | Os07g0293000 | OsR498G0714031400.01.T01 | 4-hydroxyphenylacetaldehyde oxime monooxygenase                              |
| maker-7-augustus-gene-111.29-mRNA-1 | Japonica | NA       |           | Os07g0294800 | OsR498G0714035300.01.T01 | Nucleotide-diphospho-sugar transferase family protein                        |
| maker-7-augustus-gene-111.31-mRNA-1 | Japonica | NA       |           | Os07g0295400 | OsR498G0714037500.01.T01 | nuclear pore complex protein NUP54                                           |
| maker-7-augustus-gene-111.36-mRNA-1 | Japonica | NA       |           | Os07g0295000 | OsR498G0714035600.01.T02 | S-adenosylmethionine carrier 1 chloroplastic/mitochondrial                   |
| maker-7-augustus-gene-111.40-mRNA-1 | Japonica | NA       |           | Os07g0295200 | OsR498G0714035800.01.T02 | DUF167 domain-containing protein                                             |
| maker-7-augustus-gene-112.24-mRNA-1 | Japonica | NA       |           | Os07g0296800 | OsR498G0714040700.01.T01 |                                                                              |
| maker-7-augustus-gene-112.26-mRNA-1 | Japonica | Indica   |           | Os09g0272250 | OsR498G0714041500.01.T01 |                                                                              |
| maker-7-augustus-gene-112.29-mRNA-1 | Japonica | NA       |           |              |                          | Zn-dependent exopeptidase superfamily protein                                |
| maker-7-augustus-gene-112.37-mRNA-1 | Japonica | NA       |           | Os07g0296200 | OsR498G0714040200.01.T01 | Transcription initiation factor TFIID subunit 15                             |
| maker-7-augustus-gene-113.0-mRNA-1  | Japonica | NA       |           | Os07g0297100 | OsR498G0714042700.01.T01 | MATH domain-containing protein (Fragment)                                    |
| maker-7-augustus-gene-113.10-mRNA-1 | Japonica | Japonica |           | Os07g0298100 | OsR498G0714044000.01.T01 | Actin cytoskeleton-regulatory complex protein pan1-like                      |
| maker-7-augustus-gene-113.8-mRNA-1  | Japonica | NA       |           | Os10g0521100 | OsR498G1019058200.01.T02 | Actin-depolymerizing factor                                                  |
| maker-7-augustus-gene-114.26-mRNA-1 | Japonica | NA       |           | Os07g0299600 | OsR498G0714051300.01.T03 |                                                                              |
| maker-7-augustus-gene-114.28-mRNA-1 | Japonica | Indica   |           | Os07g0298900 | OsR498G0714047000.01.T01 | HMA domain-containing protein (Fragment)                                     |
| maker-7-augustus-gene-114.30-mRNA-1 | Japonica | NA       |           | Os07g0299800 | OsR498G0714051800.01.T02 | Pentatricopeptide repeat-containing protein mitochondrial                    |
| maker-7-augustus-gene-115.22-mRNA-1 | Japonica | NA       |           | Os07g0300200 | OsR498G0714052900.01.T04 | Auxin efflux carrier                                                         |
| maker-7-augustus-gene-115.24-mRNA-1 | Japonica | NA       |           |              |                          | Aspartate kinase                                                             |
| maker-7-augustus-gene-115.29-mRNA-1 | Japonica | NA       |           | Os07g0301200 | OsR498G0714055800.01.T01 | DEAD-box ATP-dependent RNA helicase                                          |
| maker-7-augustus-gene-115.33-mRNA-1 | Japonica | NA       | Kinase-TM | Os07g0301550 | OsR498G0714056600.01.T01 | Receptor-like serine/threonine-protein kinase                                |
| maker-7-augustus-gene-119.0-mRNA-1  | Japonica | Indica   |           | Os07g0404300 | OsR498G0714065600.01.T01 | ADP-ribosyl cyclase/cyclic ADP-ribose hydrolase                              |
| maker-7-augustus-gene-120.23-mRNA-1 | Japonica | NA       |           | Os07g0405100 | OsR498G0714070300.01.T08 | WD40 domain-containing protein/LisH domain-containing protein                |
| maker-7-augustus-gene-122.29-mRNA-1 | Japonica | Indica   |           | Os08g0110700 | OsR498G0714075300.01.T10 | Phospholipase SGR2                                                           |
| maker-7-augustus-gene-122.35-mRNA-1 | Japonica | NA       |           | Os07g0406300 | OsR498G0714073200.01.T01 | Glucose-6-phosphate 1-dehydrogenase                                          |
| maker-7-augustus-gene-122.40-mRNA-1 | Japonica | NA       |           | Os07g0406800 | OsR498G0714075800.01.T04 | DNA primase large subunit                                                    |
| maker-7-augustus-gene-123.24-mRNA-1 | Japonica | NA       |           |              | OsR498G0407881700.01.T01 | Transposon protein, putative, Mutator sub-class, expressed                   |

|                                     |          |          |           |              |                          |                                                                         |
|-------------------------------------|----------|----------|-----------|--------------|--------------------------|-------------------------------------------------------------------------|
| maker-7-augustus-gene-123.28-mRNA-1 | Japonica | NA       |           | Os07g0408100 | OsR498G0714079000.01.T04 | Protein ROOT INITIATION DEFECTIVE like                                  |
| maker-7-augustus-gene-123.29-mRNA-1 | Japonica | Indica   |           | Os07g0408100 | OsR498G0714079000.01.T06 | Protein ROOT INITIATION DEFECTIVE 3                                     |
| maker-7-augustus-gene-123.40-mRNA-1 | Japonica | NA       |           | Os07g0408500 | OsR498G0714081800.01.T01 | Rho GTPase-activating protein gacA                                      |
| maker-7-augustus-gene-123.43-mRNA-1 | Japonica | NA       |           | Os07g0408700 | OsR498G0714083200.01.T01 | PABs domain-containing protein (Fragment)                               |
| maker-7-augustus-gene-124.0-mRNA-1  | Japonica | NA       |           | Os07g0409100 | OsR498G0714084300.01.T01 | Calcium-dependent lipid-binding (CaLB domain) family protein isoform 1  |
| maker-7-augustus-gene-124.10-mRNA-1 | Japonica | NA       |           | Os07g0409700 | OsR498G0714086600.01.T03 | Tim44 domain-containing protein (Fragment)                              |
| maker-7-augustus-gene-124.16-mRNA-1 | Japonica | NA       |           | Os07g0409900 | OsR498G0714087400.01.T03 | Calcium-dependent protein kinase                                        |
| maker-7-augustus-gene-124.24-mRNA-1 | Japonica | NA       |           | Os07g0410100 | OsR498G0714088800.01.T02 | Dihydrolipoamide acetyltransferase component of pyruvate dehydrogenase  |
| maker-7-augustus-gene-125.33-mRNA-1 | Japonica | NA       |           | Os07g0412400 | OsR498G0714096700.01.T02 | Adenylate kinase isoenzyme 6 homolog                                    |
| maker-7-augustus-gene-125.35-mRNA-1 | Japonica | NA       |           | Os07g0411300 | OsR498G0714094200.01.T01 | Type III polyketide synthase B                                          |
| maker-7-augustus-gene-125.37-mRNA-1 | Japonica | NA       |           | Os07g0412100 | OsR498G0714096400.01.T03 | Starch synthase, chloroplastic/amyloplastic                             |
| maker-7-augustus-gene-126.24-mRNA-1 | Japonica | NA       |           | Os07g0413700 | OsR498G0714097100.01.T06 | Poly [ADP-ribose] polymerase                                            |
| maker-7-augustus-gene-126.31-mRNA-1 | Japonica | NA       |           |              | OsR498G0306095100.01.T01 | Root cap protein 1-like                                                 |
| maker-7-augustus-gene-127.36-mRNA-1 | Japonica | NA       | Kinase-TM |              |                          | Non-specific serine/threonine protein kinase (Fragment)                 |
| maker-7-augustus-gene-127.38-mRNA-1 | Japonica | NA       |           | Os07g0414200 | OsR498G0714098600.01.T04 | Methyltransferase family protein isoform 1                              |
| maker-7-augustus-gene-127.47-mRNA-1 | Japonica | Indica   |           | Os07g0414800 | OsR498G0714099400.01.T02 | F-actin-capping protein subunit alpha                                   |
| maker-7-augustus-gene-127.52-mRNA-1 | Japonica | Japonica |           | Os07g0415600 | OsR498G1018346900.01.T03 | Transposon protein, putative, CACTA, En/Spm sub-class, expressed        |
| maker-7-augustus-gene-128.0-mRNA-1  | Japonica | NA       |           |              | OsR498G0714104400.01.T02 | Fatty acyl-CoA reductase                                                |
| maker-7-augustus-gene-128.5-mRNA-1  | Japonica | NA       |           |              | OsR498G0714105800.01.T01 | Fatty acyl-CoA reductase                                                |
| maker-7-augustus-gene-129.0-mRNA-1  | Japonica | NA       |           | Os07g0418200 | OsR498G0714111500.01.T02 | ATG8-interacting protein 1                                              |
| maker-7-augustus-gene-129.2-mRNA-1  | Japonica | Japonica |           | Os07g0418500 | OsR498G0714821100.01.T01 | Secologanin synthase                                                    |
| maker-7-augustus-gene-129.5-mRNA-1  | Japonica | NA       |           |              | OsR498G0714110600.01.T04 | probable alpha-1,6-mannosyltransferase MNN10                            |
| maker-7-augustus-gene-129.8-mRNA-1  | Japonica | NA       |           | Os07g0418000 | OsR498G0714111400.01.T02 |                                                                         |
| maker-7-augustus-gene-130.33-mRNA-1 | Japonica | Indica   |           | Os07g0419300 | OsR498G0714117100.01.T01 | Thaumatococcus-like protein 1a                                          |
| maker-7-augustus-gene-130.42-mRNA-1 | Japonica | NA       |           |              | OsR498G0714119900.01.T02 |                                                                         |
| maker-7-augustus-gene-130.44-mRNA-1 | Japonica | Japonica |           | Os07g0418500 | OsR498G0714821100.01.T01 | Secologanin synthase                                                    |
| maker-7-augustus-gene-131.0-mRNA-1  | Japonica | NA       |           |              |                          | Heteroglycan glucosidase 1                                              |
| maker-7-augustus-gene-132.0-mRNA-1  | Japonica | NA       |           |              |                          | Heteroglycan glucosidase 1                                              |
| maker-7-augustus-gene-132.12-mRNA-1 | Japonica | Japonica |           | Os07g0422100 | OsR498G0714130100.01.T01 | Plasma membrane associated protein-1                                    |
| maker-7-augustus-gene-132.4-mRNA-1  | Japonica | Indica   |           | Os10g0195600 | OsR498G0714128500.01.T01 | Benzyl alcohol O-benzoyltransferase                                     |
| maker-7-augustus-gene-132.6-mRNA-1  | Japonica | NA       |           |              |                          | Clu domain-containing protein                                           |
| maker-7-augustus-gene-133.0-mRNA-1  | Japonica | NA       |           |              | OsR498G0714131300.01.T01 | Neprosin domain-containing protein                                      |
| maker-7-augustus-gene-134.27-mRNA-1 | Japonica | NA       |           | Os07g0424400 | OsR498G0714136000.01.T01 | Cellulose synthase                                                      |
| maker-7-augustus-gene-134.35-mRNA-1 | Japonica | Indica   |           | Os07g0425000 | OsR498G0714138800.01.T01 | Folate-biotin transporter                                               |
| maker-7-augustus-gene-137.0-mRNA-1  | Japonica | NA       |           | Os07g0429700 | OsR498G0714151500.01.T02 |                                                                         |
| maker-7-augustus-gene-137.2-mRNA-1  | Japonica | NA       |           | Os07g0429500 |                          |                                                                         |
| maker-7-augustus-gene-141.42-mRNA-1 | Japonica | Indica   |           | Os07g0435300 | OsR498G0714154900.01.T01 | Photosystem I reaction center subunit IV A                              |
| maker-7-augustus-gene-141.44-mRNA-1 | Japonica | NA       |           | Os06g0255700 | OsR498G0714154400.01.T02 | Putative DNA helicase chromatin remodeling SNF2 family                  |
| maker-7-augustus-gene-141.50-mRNA-1 | Japonica | NA       |           | Os07g0434700 | OsR498G0714154600.01.T02 | Methionine aminopeptidase                                               |
| maker-7-augustus-gene-141.55-mRNA-1 | Japonica | NA       |           | Os07g0435100 | OsR498G0714154800.01.T01 | 26S proteasome non-ATPase regulatory subunit A                          |
| maker-7-augustus-gene-142.0-mRNA-1  | Japonica | NA       |           | Os07g0435400 | OsR498G0714155200.01.T02 | Ribosome biogenesis protein BOP1 homolog                                |
| maker-7-augustus-gene-142.5-mRNA-1  | Japonica | Indica   |           | Os07g0436000 | OsR498G0714157400.01.T01 | Ankyrin repeat-containing protein isoform 1                             |
| maker-7-augustus-gene-143.41-mRNA-1 | Japonica | Indica   | Kinase-TM | Os07g0438500 | OsR498G0714165300.01.T03 | Putative serine/threonine-protein kinase SIS8 isoform A                 |
| maker-7-augustus-gene-143.47-mRNA-1 | Japonica | NA       |           | Os07g0438600 | OsR498G0714165500.01.T01 | Inhibitor I9 domain-containing protein                                  |
| maker-7-augustus-gene-143.49-mRNA-1 | Japonica | NA       |           | Os02g0480100 | OsR498G0203809600.01.T03 | ATP-dependent DNA helicase                                              |
| maker-7-augustus-gene-144.0-mRNA-1  | Japonica | NA       |           |              | OsR498G0714165900.01.T01 | TLDc domain-containing protein                                          |
| maker-7-augustus-gene-144.2-mRNA-1  | Japonica | NA       |           | Os07g0438800 | OsR498G0714166700.01.T02 | Protein PHOSPHATE STARVATION RESPONSE 2                                 |
| maker-7-augustus-gene-144.7-mRNA-1  | Japonica | NA       |           | Os07g0439700 |                          |                                                                         |
| maker-7-augustus-gene-144.9-mRNA-1  | Japonica | NA       |           |              |                          | RNA-binding KH domain-containing protein PEPPER-like                    |
| maker-7-augustus-gene-145.26-mRNA-1 | Japonica | NA       |           | Os07g0442000 | OsR498G0714170700.01.T02 | FBD domain-containing protein                                           |
| maker-7-augustus-gene-146.25-mRNA-1 | Japonica | NA       |           | Os07g0442900 | OsR498G0714174300.01.T01 |                                                                         |
| maker-7-augustus-gene-147.0-mRNA-1  | Japonica | Indica   |           | Os10g0473400 | OsR498G0714179800.01.T03 | Non-lysosomal glucosylceramidase                                        |
| maker-7-augustus-gene-148.2-mRNA-1  | Japonica | Indica   |           | Os02g0622400 | OsR498G0714182300.01.T02 | GLTP domain-containing protein                                          |
| maker-7-augustus-gene-148.4-mRNA-1  | Japonica | NA       |           | Os07g0446000 | OsR498G0714182900.01.T01 | ROP-INTERACTIVE CRIB MOTIF-CONTAINING protein 6                         |
| maker-7-augustus-gene-148.6-mRNA-1  | Japonica | NA       |           | Os07g0445600 | OsR498G0714181800.01.T01 | COP1-interacting protein-related                                        |
| maker-7-augustus-gene-149.22-mRNA-1 | Japonica | NA       |           | Os07g0446100 | OsR498G0714183600.01.T01 | E3 ubiquitin-protein ligase XBO34                                       |
| maker-7-augustus-gene-149.26-mRNA-1 | Japonica | Japonica |           | Os07g0446900 | OsR498G0714188400.01.T01 |                                                                         |
| maker-7-augustus-gene-149.28-mRNA-1 | Japonica | Japonica |           | Os07g0447000 | OsR498G0714190000.01.T01 | Transposon protein, putative, CACTA, En/Spm sub-class                   |
| maker-7-augustus-gene-150.25-mRNA-1 | Japonica | NA       |           | Os07g0447800 | OsR498G0714191700.01.T02 | Phosphoglucosyltransferase (alpha-D-glucose-1,6-bisphosphate-dependent) |
| maker-7-augustus-gene-150.33-mRNA-1 | Japonica | Indica   |           | Os07g0448100 | OsR498G0714192500.01.T01 | Aquaporin                                                               |
| maker-7-augustus-gene-150.52-mRNA-1 | Japonica | NA       |           | Os07g0448800 | OsR498G0714195500.01.T01 | Aquaporin                                                               |

|                                     |          |          |            |              |                          |                                                                           |
|-------------------------------------|----------|----------|------------|--------------|--------------------------|---------------------------------------------------------------------------|
| maker-7-augustus-gene-150.56-mRNA-1 | Japonica | NA       |            |              |                          | Mitochondrial pyruvate carrier                                            |
| maker-7-augustus-gene-151.0-mRNA-1  | Japonica | Indica   |            | Os04g0524300 | OsR498G0714197200.01.T01 | Two-component response regulator ORR5                                     |
| maker-7-augustus-gene-151.2-mRNA-1  | Japonica | NA       |            | Os07g0450000 | OsR498G0714196800.01.T02 | 60S ribosomal protein L44                                                 |
| maker-7-augustus-gene-152.27-mRNA-1 | Japonica | NA       |            |              | OsR498G0714199900.01.T01 | Alpha-galactosidase                                                       |
| maker-7-augustus-gene-152.31-mRNA-1 | Japonica | NA       |            | Os07g0452400 | OsR498G0714200500.01.T01 | Exonuclease                                                               |
| maker-7-augustus-gene-152.34-mRNA-1 | Japonica | NA       |            |              | OsR498G0714201700.01.T02 |                                                                           |
| maker-7-augustus-gene-152.36-mRNA-1 | Japonica | Indica   |            | Os06g0279950 | OsR498G0714198600.01.T01 |                                                                           |
| maker-7-augustus-gene-152.40-mRNA-1 | Japonica | NA       |            | Os07g0452500 | OsR498G0714200800.01.T01 | ORMDL family                                                              |
| maker-7-augustus-gene-153.0-mRNA-1  | Japonica | NA       |            | Os07g0453400 |                          |                                                                           |
| maker-7-augustus-gene-153.2-mRNA-1  | Japonica | NA       |            |              | OsR498G0714202000.01.T01 | Prefoldin chaperone subunit family protein                                |
| maker-7-augustus-gene-154.19-mRNA-1 | Japonica | NA       |            |              | OsR498G0714209500.01.T01 | Heterogeneous nuclear ribonucleoprotein Q                                 |
| maker-7-augustus-gene-154.25-mRNA-1 | Japonica | NA       |            |              |                          |                                                                           |
| maker-7-augustus-gene-154.28-mRNA-1 | Japonica | NA       |            | Os07g0454700 | OsR498G0714212500.01.T02 | Trafficking protein particle complex subunit                              |
| maker-7-augustus-gene-154.32-mRNA-1 | Japonica | NA       |            | Os03g0240900 | OsR498G0305547000.01.T01 | Misato Segment II tubulin-like domain                                     |
| maker-7-augustus-gene-154.37-mRNA-1 | Japonica | NA       |            | Os01g0858000 | OsR498G0102370200.01.T01 | AT hook motif-containing protein-like                                     |
| maker-7-augustus-gene-154.47-mRNA-1 | Japonica | Indica   |            | Os07g0455100 | OsR498G0714213200.01.T03 | Protein prenyltransferase superfamily protein                             |
| maker-7-augustus-gene-155.28-mRNA-1 | Japonica | NA       |            | Os07g0456700 | OsR498G0714218100.01.T04 | Endo-1,4-beta-xylanase A-like                                             |
| maker-7-augustus-gene-155.32-mRNA-1 | Japonica | NA       |            | Os07g0456400 | OsR498G0714217600.01.T04 | Peroxisomal membrane protein 11-4-like                                    |
| maker-7-augustus-gene-155.36-mRNA-1 | Japonica | NA       |            |              | OsR498G0714217800.01.T03 | Phosphatidylinositol/phosphatidylcholine transfer protein SFH11           |
| maker-7-augustus-gene-155.40-mRNA-1 | Japonica | NA       |            |              |                          |                                                                           |
| maker-7-augustus-gene-156.0-mRNA-1  | Japonica | NA       |            | Os07g0457300 | OsR498G0714219700.01.T01 | Putative acyclic terpene utilization                                      |
| maker-7-augustus-gene-156.11-mRNA-1 | Japonica | NA       |            | Os07g0458800 | OsR498G0714228700.01.T01 | Serine/threonine-protein kinase                                           |
| maker-7-augustus-gene-156.17-mRNA-1 | Japonica | NA       | LRR-NBS-TM |              | OsR498G0714220800.01.T01 | NB-ARC domain, putative                                                   |
| maker-7-augustus-gene-156.8-mRNA-1  | Japonica | Indica   |            | Os07g0458500 | OsR498G0714228300.01.T03 | EXPERA domain-containing protein (Fragment)                               |
| maker-7-augustus-gene-157.28-mRNA-1 | Japonica | NA       |            | Os07g0459400 | OsR498G0714230100.01.T03 | Ultraviolet-B receptor UVR8                                               |
| maker-7-augustus-gene-157.32-mRNA-1 | Japonica | NA       |            |              | OsR498G0714230100.01.T07 | F-box domain-containing protein                                           |
| maker-7-augustus-gene-157.34-mRNA-1 | Japonica | NA       | Kinase-TM  |              | OsR498G0714229400.01.T02 | ABC1 domain-containing protein (Fragment)                                 |
| maker-7-augustus-gene-157.39-mRNA-1 | Japonica | Indica   |            | Os05g0168200 | OsR498G0714233600.01.T01 |                                                                           |
| maker-7-augustus-gene-158.0-mRNA-1  | Japonica | NA       |            | Os01g0962100 | OsR498G0102744500.01.T02 |                                                                           |
| maker-7-augustus-gene-158.2-mRNA-1  | Japonica | NA       |            |              | OsR498G0714236700.01.T01 | WRKY transcription factor                                                 |
| maker-7-augustus-gene-158.4-mRNA-1  | Japonica | NA       |            | Os07g0461500 | OsR498G0714239200.01.T01 | Clathrin light chain                                                      |
| maker-7-augustus-gene-158.6-mRNA-1  | Japonica | Indica   |            | Os07g0461600 | OsR498G0714239400.01.T09 | Glutamate--cysteine ligase                                                |
| maker-7-augustus-gene-159.0-mRNA-1  | Japonica | Japonica |            | Os07g0461700 | OsR498G0714240500.01.T01 | FAR1 domain-containing protein                                            |
| maker-7-augustus-gene-159.10-mRNA-1 | Japonica | NA       |            | Os07g0463400 | OsR498G0714245100.01.T05 | Ring zinc finger protein-like                                             |
| maker-7-augustus-gene-159.14-mRNA-1 | Japonica | Indica   |            | Os07g0461900 | OsR498G0509663100.01.T03 | Acetylornithine aminotransferase, mitochondrial                           |
| maker-7-augustus-gene-159.2-mRNA-1  | Japonica | NA       |            |              | OsR498G0714242300.01.T01 | GTPase activating protein-like                                            |
| maker-7-augustus-gene-159.26-mRNA-1 | Japonica | NA       |            | Os07g0463100 | OsR498G0714244000.01.T01 | DNA-directed RNA polymerases I                                            |
| maker-7-augustus-gene-159.4-mRNA-1  | Japonica | NA       |            | Os07g0462700 | OsR498G0714242700.01.T01 | 4HBT domain-containing protein                                            |
| maker-7-augustus-gene-159.6-mRNA-1  | Japonica | NA       |            | Os07g0464200 | OsR498G0714248200.01.T01 | Acetylserotonin O-methyltransferase 3                                     |
| maker-7-augustus-gene-159.8-mRNA-1  | Japonica | NA       |            |              |                          | AAI domain-containing protein                                             |
| maker-7-augustus-gene-160.37-mRNA-1 | Japonica | NA       |            |              | OsR498G1221160700.01.T01 | Transposon protein, putative, CACTA, En/Spm sub-class                     |
| maker-7-augustus-gene-160.40-mRNA-1 | Japonica | NA       |            | Os07g0464600 | OsR498G0714249900.01.T01 | ABC transporter B family member 28                                        |
| maker-7-augustus-gene-160.46-mRNA-1 | Japonica | Indica   |            | Os07g0462700 | OsR498G0714245400.01.T01 | 4HBT domain-containing protein                                            |
| maker-7-augustus-gene-160.49-mRNA-1 | Japonica | NA       |            | Os07g0463600 | OsR498G0714245600.01.T01 | trans-resveratrol di-O-methyltransferase-like isoform X2                  |
| maker-7-augustus-gene-160.52-mRNA-1 | Japonica | NA       |            | Os07g0464200 | OsR498G0714248200.01.T01 | Eugenol O-methyltransferase (Fragment)                                    |
| maker-7-augustus-gene-161.24-mRNA-1 | Japonica | NA       |            |              | OsR498G0714252700.01.T01 | Sterol 14-demethylase                                                     |
| maker-7-augustus-gene-161.26-mRNA-1 | Japonica | Indica   |            | Os07g0527900 | OsR498G0714254700.01.T01 | GDSL esterase/lipase                                                      |
| maker-7-augustus-gene-162.27-mRNA-1 | Japonica | NA       |            | Os07g0466200 | OsR498G0714254900.01.T06 | 2-phosphoglycerate kinase, putative, expressed                            |
| maker-7-augustus-gene-162.38-mRNA-1 | Japonica | NA       |            | Os07g0466300 | OsR498G0714255400.01.T01 | Ubiquitin-related modifier 1 homolog                                      |
| maker-7-augustus-gene-162.40-mRNA-1 | Japonica | NA       |            | Os07g0467200 | OsR498G0714258600.01.T01 | 2 iron, 2 sulfur cluster binding protein                                  |
| maker-7-augustus-gene-163.21-mRNA-1 | Japonica | NA       |            | Os07g0467500 | OsR498G0714259700.01.T01 | Growth-regulating factor like                                             |
| maker-7-augustus-gene-163.24-mRNA-1 | Japonica | NA       |            |              | OsR498G0714260700.01.T01 | S-acyltransferase                                                         |
| maker-7-augustus-gene-163.29-mRNA-1 | Japonica | NA       |            |              | OsR498G0714260900.01.T03 | DNA-directed primase/polymerase protein isoform X2                        |
| maker-7-augustus-gene-163.33-mRNA-1 | Japonica | NA       |            |              | OsR498G0714260200.01.T01 | TVP38/TMEM64 family membrane protein slr0305 family                       |
| maker-7-augustus-gene-165.37-mRNA-1 | Japonica | NA       |            | Os07g0468800 | OsR498G0611686100.01.T01 | Proteasome endopeptidase complex                                          |
| maker-7-augustus-gene-165.39-mRNA-1 | Japonica | NA       |            |              | OsR498G0714263100.01.T02 | Thylakoid membrane phosphoprotein 14 kDa, chloroplastic                   |
| maker-7-augustus-gene-166.27-mRNA-1 | Japonica | NA       |            | Os07g0470700 | OsR498G0714267700.01.T01 | probable plastid-lipid-associated protein 12, chloroplastic               |
| maker-7-augustus-gene-166.33-mRNA-1 | Japonica | NA       | Kinase-TM  | Os07g0471000 | OsR498G0714268500.01.T01 | Serine/threonine-protein kinase/endoribonuclease IRE1a                    |
| maker-7-augustus-gene-166.38-mRNA-1 | Japonica | NA       |            | Os12g0468900 | OsR498G0916869000.01.T01 | Cell wall protein-like                                                    |
| maker-7-augustus-gene-166.40-mRNA-1 | Japonica | NA       |            | Os07g0471100 | OsR498G0714269100.01.T01 | Putative histone-lysine N-methyltransferase chromatin remodeling SET fami |
| maker-7-augustus-gene-166.45-mRNA-1 | Japonica | NA       |            |              |                          | Piwi domain-containing protein                                            |

|                                     |          |          |              |              |                          |                                                               |
|-------------------------------------|----------|----------|--------------|--------------|--------------------------|---------------------------------------------------------------|
| maker-7-augustus-gene-167.27-mRNA-1 | Japonica | NA       |              | Os07g0471900 | OsR498G0714273300.01.T01 | BHLH domain-containing protein (Fragment)                     |
| maker-7-augustus-gene-167.31-mRNA-1 | Japonica | NA       |              |              | OsR498G0714274900.01.T04 | zf-LSD1 domain-containing protein                             |
| maker-7-augustus-gene-167.33-mRNA-1 | Japonica | NA       |              |              |                          |                                                               |
| maker-7-augustus-gene-167.38-mRNA-1 | Japonica | Indica   | Kinase-TM    | Os07g0472400 | OsR498G0714275700.01.T01 | probable serine/threonine-protein kinase sky1                 |
| maker-7-augustus-gene-167.41-mRNA-1 | Japonica | NA       |              | Os07g0472500 | OsR498G0714276100.01.T01 | Golgi-localized GRIP domain-containing protein isoform 1      |
| maker-7-augustus-gene-167.48-mRNA-1 | Japonica | NA       |              |              | OsR498G0714274000.01.T03 | Pentatricopeptide repeat-containing protein                   |
| maker-7-augustus-gene-167.49-mRNA-1 | Japonica | NA       |              | Os07g0472300 | OsR498G0714275200.01.T01 |                                                               |
| maker-7-augustus-gene-168.0-mRNA-1  | Japonica | NA       |              | Os07g0474300 | OsR498G0714282100.01.T01 | Group 2 truncated hemoglobin Yjbl-like                        |
| maker-7-augustus-gene-168.2-mRNA-1  | Japonica | Indica   |              | Os12g0267200 | OsR498G0714282700.01.T03 | (S)-tetrahydroprotoberberine N-methyltransferase              |
| maker-7-augustus-gene-168.8-mRNA-1  | Japonica | Japonica |              | Os07g0513300 | OsR498G0100612800.01.T01 | Transposable element protein, putative, MuDR                  |
| maker-7-augustus-gene-169.27-mRNA-1 | Japonica | NA       |              |              |                          | AAI domain-containing protein                                 |
| maker-7-augustus-gene-169.29-mRNA-1 | Japonica | NA       |              | Os07g0475000 | OsR498G0714283900.01.T01 | Rhomboid domain-containing protein                            |
| maker-7-augustus-gene-169.31-mRNA-1 | Japonica | NA       |              | Os07g0475400 | OsR498G0714285400.01.T01 |                                                               |
| maker-7-augustus-gene-169.35-mRNA-1 | Japonica | Indica   | Kinase-TM    | Os07g0475900 | OsR498G0714289000.01.T01 | serine/threonine-protein kinase STY46 isoform X2              |
| maker-7-augustus-gene-170.11-mRNA-1 | Japonica | NA       |              | Os07g0476500 | OsR498G0714294200.01.T03 | Peptidyl-prolyl cis-trans isomerase                           |
| maker-7-augustus-gene-170.16-mRNA-1 | Japonica | NA       |              | Os07g0477000 | OsR498G0714295000.01.T02 | RNA polymerase Rpb7 N-terminal domain-containing protein      |
| maker-7-augustus-gene-170.3-mRNA-1  | Japonica | NA       |              |              |                          | RNA polymerase-associated protein CTR9-like                   |
| maker-7-augustus-gene-171.26-mRNA-1 | Japonica | NA       |              | Os07g0479100 | OsR498G0714302100.01.T07 | NEP1-interacting protein 2                                    |
| maker-7-augustus-gene-171.30-mRNA-1 | Japonica | NA       |              | Os07g0479200 | OsR498G0714302300.01.T01 | Mannose-P-dolichol utilization defect 1 protein homolog       |
| maker-7-augustus-gene-171.36-mRNA-1 | Japonica | NA       |              | Os07g0479300 | OsR498G0714302800.01.T01 | Carboxypeptidase                                              |
| maker-7-augustus-gene-171.42-mRNA-1 | Japonica | Indica   |              | Os03g0108400 | OsR498G0714303800.01.T01 | Vacuolar protein sorting-associated protein 1                 |
| maker-7-augustus-gene-171.48-mRNA-1 | Japonica | Indica   |              | Os07g0479600 | OsR498G0714304000.01.T02 | DUF4050 domain-containing protein (Fragment)                  |
| maker-7-augustus-gene-172.0-mRNA-1  | Japonica | Indica   |              | Os10g0545500 | OsR498G0714307700.01.T01 | Xyloglucan endotransglucosylase/hydrolase                     |
| maker-7-augustus-gene-172.11-mRNA-1 | Japonica | NA       |              |              | OsR498G0714308700.01.T02 | Sn1-specific diacylglycerol lipase alpha                      |
| maker-7-augustus-gene-172.14-mRNA-1 | Japonica | NA       | LRR-NBS-TM   | Os07g0481300 | OsR498G0714308900.01.T01 | Putative disease resistance protein RGA3                      |
| maker-7-augustus-gene-172.16-mRNA-1 | Japonica | NA       |              | Os07g0481100 | OsR498G0714308600.01.T01 | Rop guanine nucleotide exchange factor 3                      |
| maker-7-augustus-gene-172.3-mRNA-1  | Japonica | Japonica |              | Os07g0480900 | OsR498G0714308100.01.T01 | probable cysteine protease RD19D                              |
| maker-7-augustus-gene-172.5-mRNA-1  | Japonica | NA       |              | Os07g0481000 | OsR498G0714308300.01.T04 | Zinc finger MYND domain-containing protein 15                 |
| maker-7-augustus-gene-173.0-mRNA-1  | Japonica | NA       | CC-NBS-TM    | Os07g0481400 | OsR498G0714309200.01.T01 | Putative NB-ARC domain-containing protein (Fragment)          |
| maker-7-augustus-gene-174.0-mRNA-1  | Japonica | NA       |              | Os07g0483400 | OsR498G0714311900.01.T01 | Filamin A-interacting protein                                 |
| maker-7-augustus-gene-174.3-mRNA-1  | Japonica | NA       |              | Os07g0482975 | OsR498G0714310200.01.T01 | Cytochrome P450 family protein, expressed                     |
| maker-7-augustus-gene-174.4-mRNA-1  | Japonica | Indica   |              | Os07g0483050 | OsR498G0714310200.01.T01 | Cytochrome P450 family protein, expressed                     |
| maker-7-augustus-gene-175.26-mRNA-1 | Japonica | NA       |              | Os07g0484200 | OsR498G0714314300.01.T01 | actin-depolymerizing factor                                   |
| maker-7-augustus-gene-175.35-mRNA-1 | Japonica | Japonica |              | Os07g0484700 | OsR498G0408431700.01.T02 | MYB transcription factor 31-D                                 |
| maker-7-augustus-gene-175.44-mRNA-1 | Japonica | Japonica |              | Os07g0484300 | OsR498G0714314610.01.T04 | E3 ubiquitin protein like                                     |
| maker-7-augustus-gene-175.50-mRNA-1 | Japonica | NA       |              | Os07g0484800 | OsR498G0714316600.01.T01 | Adenine phosphoribosyltransferase                             |
| maker-7-augustus-gene-175.54-mRNA-1 | Japonica | NA       |              | Os07g0485100 | OsR498G0714317800.01.T01 | Carbon-nitrogen hydrolase                                     |
| maker-7-augustus-gene-176.0-mRNA-1  | Japonica | NA       |              |              | OsR498G0714319700.01.T01 | Asparaginyl-tRNA synthetase, chloroplastic/mitochondrial      |
| maker-7-augustus-gene-176.12-mRNA-1 | Japonica | NA       |              | Os07g0486500 | OsR498G0714323300.01.T01 | Rho-GAP domain-containing protein (Fragment)                  |
| maker-7-augustus-gene-176.16-mRNA-1 | Japonica | Indica   |              | Os07g0485500 | OsR498G0714320000.01.T01 |                                                               |
| maker-7-augustus-gene-176.19-mRNA-1 | Japonica | Indica   |              | Os07g0485600 | OsR498G0714320400.01.T02 | p53 and DNA damage-regulated protein 1                        |
| maker-7-augustus-gene-176.22-mRNA-1 | Japonica | NA       |              | Os07g0486100 | OsR498G0714321600.01.T02 |                                                               |
| maker-7-augustus-gene-176.4-mRNA-1  | Japonica | NA       |              |              | OsR498G0714321300.01.T02 | DNA mismatch repair protein MSH4                              |
| maker-7-augustus-gene-177.0-mRNA-1  | Japonica | Japonica |              | Os07g0486700 | OsR498G0714323900.01.T01 | Glycosyltransferase                                           |
| maker-7-augustus-gene-177.3-mRNA-1  | Japonica | NA       | Kinase-TM    | Os07g0487400 |                          | Receptor protein kinase-like protein                          |
| maker-7-augustus-gene-178.0-mRNA-1  | Japonica | NA       |              |              | OsR498G0714327900.01.T01 | Fatty acyl-CoA reductase                                      |
| maker-7-augustus-gene-178.6-mRNA-1  | Japonica | NA       |              | Os07g0489000 | OsR498G0714327600.01.T01 | AAI domain-containing protein                                 |
| maker-7-augustus-gene-190.32-mRNA-1 | Japonica | NA       |              | Os07g0509600 | OsR498G0714401700.01.T01 | rRNA adenine N(6)-methyltransferase                           |
| maker-7-augustus-gene-190.45-mRNA-1 | Japonica | NA       |              | Os07g0509800 | OsR498G0714402400.01.T01 | Thioredoxin-independent 5'-adenyllysulfate reductase          |
| maker-7-augustus-gene-191.29-mRNA-1 | Japonica | NA       |              | Os07g0510200 | OsR498G0714404300.01.T01 | Glucan endo-1,3-beta-D-glucosidase                            |
| maker-7-augustus-gene-192.26-mRNA-1 | Japonica | NA       |              |              | OsR498G0714412700.01.T04 | Bromo domain-containing protein                               |
| maker-7-augustus-gene-194.31-mRNA-1 | Japonica | NA       | CC-Kinase-TM | Os07g0515100 | OsR498G0714421000.01.T03 | Calcium-dependent protein kinase                              |
| maker-7-augustus-gene-195.37-mRNA-1 | Japonica | Indica   |              | Os07g0515700 | OsR498G0714424710.01.T03 |                                                               |
| maker-7-augustus-gene-200.44-mRNA-1 | Japonica | NA       |              | Os07g0525900 | OsR498G0714469600.01.T01 | Bisdemethoxycurcumin synthase                                 |
| maker-7-augustus-gene-203.10-mRNA-1 | Japonica | Indica   |              | Os07g0531700 | OsR498G0714487700.01.T01 | NUC153 domain-containing protein (Fragment)                   |
| maker-7-augustus-gene-203.27-mRNA-1 | Japonica | NA       |              | Os07g0531600 | OsR498G0714487600.01.T01 | Glycerol-3-phosphate O-acyltransferase 3/4                    |
| maker-7-augustus-gene-204.0-mRNA-1  | Japonica | NA       |              |              | OsR498G0714489900.01.T01 | PGG domain-containing protein (Fragment)                      |
| maker-7-augustus-gene-204.5-mRNA-1  | Japonica | Indica   |              | Os07g0532500 | OsR498G0714492200.01.T02 | Ankyrin repeat protein-like                                   |
| maker-7-augustus-gene-205.7-mRNA-1  | Japonica | NA       | Kinase       |              | OsR498G0714495300.01.T01 | G-type lectin 5-receptor-like serine/threonine-protein kinase |
| maker-7-augustus-gene-206.4-mRNA-1  | Japonica | NA       | Kinase-TM    | Os07g0537000 | OsR498G0714501700.01.T01 | Receptor-like serine-threonine protein kinase                 |
| maker-7-augustus-gene-206.5-mRNA-1  | Japonica | NA       | Kinase-TM    |              |                          | G-type lectin 5-receptor-like serine/threonine-protein kinase |



|                                     |          |          |              |              |                          |                                                                           |
|-------------------------------------|----------|----------|--------------|--------------|--------------------------|---------------------------------------------------------------------------|
| maker-7-augustus-gene-207.55-mRNA-1 | Japonica | Indica   | CC-Kinase-TM | Os07g0538400 | OsR498G0714507100.01.T01 | Cysteine-rich receptor-like protein kinase 6                              |
| maker-7-augustus-gene-207.62-mRNA-1 | Japonica | NA       | Kinase-TM    | Os07g0537500 | OsR498G0714502600.01.T01 | Cysteine-rich receptor-like protein kinase 6                              |
| maker-7-augustus-gene-207.81-mRNA-1 | Japonica | NA       |              |              |                          | Glucan endo-1,3-beta-D-glucosidase                                        |
| maker-7-augustus-gene-208.31-mRNA-1 | Japonica | Indica   | Kinase-TM    | Os07g0537900 | OsR498G0714510100.01.T01 | Cysteine-rich receptor-like protein kinase 8                              |
| maker-7-augustus-gene-208.38-mRNA-1 | Japonica | Japonica |              | Os07g0539900 | OsR498G0714510800.01.T02 | Glucan endo-1,3-beta-D-glucosidase                                        |
| maker-7-augustus-gene-209.24-mRNA-1 | Japonica | NA       |              | Os07g0541500 | OsR498G0714517300.01.T03 | Receptor-like serine-threonine protein kinase                             |
| maker-7-augustus-gene-209.33-mRNA-1 | Japonica | NA       | Kinase-TM    |              |                          | Cysteine-rich receptor-like protein kinase 25 isoform C                   |
| maker-7-augustus-gene-209.7-mRNA-1  | Japonica | Indica   | Kinase-TM    | Os07g0541500 | OsR498G0714517300.01.T01 | Cysteine-rich receptor kinase                                             |
| maker-7-augustus-gene-21.37-mRNA-1  | Japonica | NA       |              | Os07g0147500 | OsR498G0713510500.01.T02 | Photosystem II 10 kDa polypeptide, chloroplastic                          |
| maker-7-augustus-gene-21.41-mRNA-1  | Japonica | Indica   |              | Os07g0147500 | OsR498G0713510700.01.T01 | Photosystem II 10 kDa polypeptide, chloroplastic                          |
| maker-7-augustus-gene-21.44-mRNA-1  | Japonica | Indica   |              | Os09g0133700 | OsR498G0713511300.01.T04 | GlcNAc kinase                                                             |
| maker-7-augustus-gene-21.47-mRNA-1  | Japonica | NA       |              | Os07g0148200 | OsR498G0713512500.01.T01 | Anthocyanidin 3-O-glucosyltransferase                                     |
| maker-7-augustus-gene-21.48-mRNA-1  | Japonica | NA       |              |              | OsR498G0713515100.01.T01 | 187-kDa microtubule-associated protein AIR9                               |
| maker-7-augustus-gene-21.56-mRNA-1  | Japonica | NA       |              | Os07g0148900 | OsR498G0713515500.01.T01 | Photosystem I reaction center subunit psaK, chloroplastic                 |
| maker-7-augustus-gene-21.59-mRNA-1  | Japonica | NA       |              | Os07g0147800 | OsR498G0713511600.01.T05 | WPP domain-associated protein                                             |
| maker-7-augustus-gene-21.62-mRNA-1  | Japonica | NA       |              | Os07g0147900 | OsR498G0713512200.01.T01 | Ferredoxin--NADP reductase, chloroplastic                                 |
| maker-7-augustus-gene-210.35-mRNA-1 | Japonica | NA       | Kinase-TM    |              |                          | Pkinase domain-containing protein/Stress-antifung domain-containing prote |
| maker-7-augustus-gene-210.39-mRNA-1 | Japonica | NA       |              | Os07g0542900 | OsR498G0714521300.01.T01 | Phytoecyanin domain-containing protein (Fragment)                         |
| maker-7-augustus-gene-210.41-mRNA-1 | Japonica | NA       |              | Os07g0543100 | OsR498G0714521700.01.T02 | Beta-amylase                                                              |
| maker-7-augustus-gene-210.44-mRNA-1 | Japonica | Indica   | Kinase-TM    | Os07g0542400 | OsR498G0714520000.01.T01 | Cysteine-rich receptor-like protein kinase 15                             |
| maker-7-augustus-gene-210.56-mRNA-1 | Japonica | NA       |              | Os07g0543000 | OsR498G0714521600.01.T02 | Transcription factor like                                                 |
| maker-7-augustus-gene-211.0-mRNA-1  | Japonica | NA       |              | Os07g0543200 | OsR498G0714522100.01.T01 | Beta-amylase                                                              |
| maker-7-augustus-gene-211.11-mRNA-1 | Japonica | NA       |              | Os07g0545400 | OsR498G0714525700.01.T01 |                                                                           |
| maker-7-augustus-gene-211.13-mRNA-1 | Japonica | NA       |              | Os07g0544900 | OsR498G0714524800.01.T02 | 54S ribosomal protein L24, mitochondrial                                  |
| maker-7-augustus-gene-211.15-mRNA-1 | Japonica | NA       |              | Os07g0545500 | OsR498G0714526000.01.T01 | Formin-like protein 11                                                    |
| maker-7-augustus-gene-211.2-mRNA-1  | Japonica | Japonica |              | Os07g0543500 | OsR498G0714522500.01.T01 | Saposin B-type domain-containing protein                                  |
| maker-7-augustus-gene-211.5-mRNA-1  | Japonica | NA       |              | Os07g0544800 | OsR498G0714524300.01.T01 | Oxygen-evolving enhancer protein like                                     |
| maker-7-augustus-gene-211.7-mRNA-1  | Japonica | NA       |              | Os07g0545100 | OsR498G0714525100.01.T01 | Putative GPI inositol-deacylase C                                         |
| maker-7-augustus-gene-211.9-mRNA-1  | Japonica | NA       |              | Os07g0545300 | OsR498G0714525300.01.T01 |                                                                           |
| maker-7-augustus-gene-212.34-mRNA-1 | Japonica | NA       |              |              | OsR498G0714527700.01.T02 | Pentatricopeptide repeat-containing protein chloroplastic                 |
| maker-7-augustus-gene-212.39-mRNA-1 | Japonica | NA       |              | Os07g0546000 | OsR498G0714527900.01.T01 | Isopentenyl-diphosphate Delta-isomerase II, chloroplastic                 |
| maker-7-augustus-gene-212.43-mRNA-1 | Japonica | NA       |              | Os07g0546100 | OsR498G0714528100.01.T03 | HAT dimerization domain-containing protein                                |
| maker-7-augustus-gene-212.50-mRNA-1 | Japonica | NA       |              | Os07g0546200 |                          |                                                                           |
| maker-7-augustus-gene-212.52-mRNA-1 | Japonica | NA       |              | Os07g0546600 | OsR498G0714530800.01.T02 | Glutamate receptor 3.4-like                                               |
| maker-7-augustus-gene-212.57-mRNA-1 | Japonica | NA       |              |              | OsR498G0714531000.01.T02 | 60S ribosomal protein L38                                                 |
| maker-7-augustus-gene-213.32-mRNA-1 | Japonica | NA       |              | Os07g0548300 | OsR498G0714533900.01.T02 | Pentatricopeptide repeat-containing protein, chloroplastic                |
| maker-7-augustus-gene-213.37-mRNA-1 | Japonica | NA       |              | Os07g0548800 | OsR498G0714534700.01.T01 | Protein kinase family protein / WD-40 repeat family protein               |
| maker-7-augustus-gene-213.40-mRNA-1 | Japonica | NA       |              | Os07g0548100 |                          |                                                                           |
| maker-7-augustus-gene-213.42-mRNA-1 | Japonica | Japonica |              | Os07g0548100 | OsR498G0714534100.01.T01 |                                                                           |
| maker-7-augustus-gene-213.44-mRNA-1 | Japonica | Japonica |              | Os07g0548100 | OsR498G0714533800.01.T01 |                                                                           |
| maker-7-augustus-gene-213.47-mRNA-1 | Japonica | Indica   |              | Os07g0548900 | OsR498G0714535000.01.T01 | Proteasome inhibitor                                                      |
| maker-7-augustus-gene-214.10-mRNA-1 | Japonica | NA       |              | Os07g0549800 | OsR498G0714537100.01.T01 | Glycine-rich RNA-binding protein 4                                        |
| maker-7-augustus-gene-214.12-mRNA-1 | Japonica | NA       |              | Os07g0550600 | OsR498G0714539100.01.T01 | Benzyl alcohol O-benzoyltransferase                                       |
| maker-7-augustus-gene-214.14-mRNA-1 | Japonica | NA       |              | Os07g0549200 | OsR498G0714535600.01.T01 | protein THYLAKOID ASSEMBLY 8-like, chloroplastic                          |
| maker-7-augustus-gene-214.16-mRNA-1 | Japonica | Japonica |              | Os10g0388500 | OsR498G0714536000.01.T02 |                                                                           |
| maker-7-augustus-gene-214.18-mRNA-1 | Japonica | NA       | Kinase-TM    |              | OsR498G0714538800.01.T02 | Non-specific serine/threonine protein kinase (Fragment)                   |
| maker-7-augustus-gene-214.21-mRNA-1 | Japonica | NA       | Kinase-TM    | Os07g0550900 | OsR498G0714541400.01.T01 | Serine/threonine-protein kinase                                           |
| maker-7-augustus-gene-214.25-mRNA-1 | Japonica | NA       | Kinase-TM    | Os07g0551300 | OsR498G0714542600.01.T02 | Serine/threonine-protein kinase                                           |
| maker-7-augustus-gene-215.42-mRNA-1 | Japonica | Indica   |              | Os07g0551500 | OsR498G0714543800.01.T01 | Probable mixed-linked glucan synthase 9                                   |
| maker-7-augustus-gene-215.43-mRNA-1 | Japonica | NA       |              | Os07g0551700 | OsR498G0714545000.01.T01 | Cellulose synthase-like CslF8                                             |
| maker-7-augustus-gene-216.0-mRNA-1  | Japonica | Indica   |              | Os07g0449100 | OsR498G0714550700.01.T02 | Mitochondrial pyruvate carrier                                            |
| maker-7-augustus-gene-216.3-mRNA-1  | Japonica | NA       |              | Os07g0553400 | OsR498G0714548600.01.T01 | Mixed-linked glucan synthase 4                                            |
| maker-7-augustus-gene-216.5-mRNA-1  | Japonica | NA       |              |              | OsR498G0714552200.01.T02 | Protein PLANT CADMIUM RESISTANCE 8                                        |
| maker-7-augustus-gene-217.11-mRNA-1 | Japonica | NA       |              |              |                          | F-box domain-containing protein                                           |
| maker-7-augustus-gene-218.0-mRNA-1  | Japonica | NA       |              | Os07g0557500 | OsR498G0714563100.01.T02 | Lysine-specific demethylase MJM25                                         |
| maker-7-augustus-gene-218.17-mRNA-1 | Japonica | NA       |              | Os07g0557400 | OsR498G0714563000.01.T01 | Equilibrative nucleoside transporter                                      |
| maker-7-augustus-gene-218.26-mRNA-1 | Japonica | Japonica |              | Os07g0557700 | OsR498G0714563600.01.T01 | Acidic phospholipase A2                                                   |
| maker-7-augustus-gene-218.28-mRNA-1 | Japonica | NA       |              | Os07g0558000 | OsR498G0714565000.01.T04 | ABC1 family protein mitochondrial                                         |
| maker-7-augustus-gene-218.3-mRNA-1  | Japonica | NA       |              |              |                          |                                                                           |
| maker-7-augustus-gene-218.5-mRNA-1  | Japonica | NA       |              |              |                          | F-box domain-containing protein (Fragment)                                |
| maker-7-augustus-gene-218.7-mRNA-1  | Japonica | NA       |              | Os07g0557100 | OsR498G0714561800.01.T02 | Equilibrative nucleotide transporter like                                 |

|                                     |          |          |               |              |                          |                                                                                |
|-------------------------------------|----------|----------|---------------|--------------|--------------------------|--------------------------------------------------------------------------------|
| maker-7-augustus-gene-219.0-mRNA-1  | Japonica | NA       |               | Os07g0558800 | OsR498G0714569100.01.T01 | Vesicle-associated protein 4-2                                                 |
| maker-7-augustus-gene-219.12-mRNA-1 | Japonica | NA       |               | Os07g0558300 | OsR498G0714567400.01.T01 | Putative PAP-specific phosphatase, mitochondrial                               |
| maker-7-augustus-gene-219.15-mRNA-1 | Japonica | NA       |               | Os07g0558400 | OsR498G0714568000.01.T01 | Chlorophyll a-b binding protein, chloroplastic                                 |
| maker-7-augustus-gene-219.17-mRNA-1 | Japonica | NA       |               | Os07g0558500 | OsR498G0714568200.01.T02 | Protein THYLAKOID FORMATION 1 chloroplastic                                    |
| maker-7-augustus-gene-219.20-mRNA-1 | Japonica | NA       |               | Os07g0559400 | OsR498G0714569800.01.T01 | Putative thioredoxin-like, immunoglobulin-like protein                         |
| maker-7-augustus-gene-219.22-mRNA-1 | Japonica | NA       |               | Os07g0559700 | OsR498G0714570800.01.T01 | Sugar carrier protein C                                                        |
| maker-7-augustus-gene-219.25-mRNA-1 | Japonica | NA       |               | Os07g0560300 | OsR498G0714572400.01.T02 | Vacuolar protein 8                                                             |
| maker-7-augustus-gene-219.6-mRNA-1  | Japonica | NA       |               | Os07g0558100 | OsR498G0714565800.01.T01 | MYB transcription factor                                                       |
| maker-7-augustus-gene-219.8-mRNA-1  | Japonica | Japonica |               | Os07g0558200 | OsR498G0714567400.01.T01 | Putative PAP-specific phosphatase, mitochondrial                               |
| maker-7-augustus-gene-22.4-mRNA-1   | Japonica | NA       |               | Os07g0149300 |                          |                                                                                |
| maker-7-augustus-gene-22.7-mRNA-1   | Japonica | Indica   |               | Os07g0149900 | OsR498G0713518200.01.T01 | Carbohydrate-binding X8 domain superfamily protein isoform 1                   |
| maker-7-augustus-gene-22.9-mRNA-1   | Japonica | NA       |               | Os07g0150100 | OsR498G0713518400.01.T01 | Early-responsive to dehydration stress protein (ERD4) isoform 1                |
| maker-7-augustus-gene-220.2-mRNA-1  | Japonica | NA       |               | Os07g0561300 | OsR498G0714575800.01.T01 | F-box protein SKIP27                                                           |
| maker-7-augustus-gene-221.51-mRNA-1 | Japonica | NA       |               | Os07g0562900 |                          | Ribosomal RNA small subunit methyltransferase H                                |
| maker-7-augustus-gene-221.53-mRNA-1 | Japonica | NA       |               |              | OsR498G0714581100.01.T03 | D-erythro-sphingosine kinase/ diacylglycerol kinase                            |
| maker-7-augustus-gene-221.60-mRNA-1 | Japonica | Indica   |               | Os07g0562800 | OsR498G0714579000.01.T01 | Myosin-2                                                                       |
| maker-7-augustus-gene-222.37-mRNA-1 | Japonica | NA       |               |              | OsR498G0714581900.01.T01 | B3 domain-containing transcription factor VAL3                                 |
| maker-7-augustus-gene-222.45-mRNA-1 | Japonica | NA       |               | Os07g0563600 |                          |                                                                                |
| maker-7-augustus-gene-222.47-mRNA-1 | Japonica | NA       |               | Os07g0563700 | OsR498G0714583500.01.T01 | Elongator complex protein 1                                                    |
| maker-7-augustus-gene-222.49-mRNA-1 | Japonica | NA       |               |              |                          |                                                                                |
| maker-7-augustus-gene-222.53-mRNA-1 | Japonica | NA       |               | Os07g0564400 |                          |                                                                                |
| maker-7-augustus-gene-222.60-mRNA-1 | Japonica | NA       |               | Os07g0564500 | OsR498G0714585900.01.T02 | Internal alternative NAD(P)H-ubiquinone oxidoreductase                         |
| maker-7-augustus-gene-222.62-mRNA-1 | Japonica | NA       |               | Os07g0563400 | OsR498G0714582200.01.T01 | Cotton fiber expressed protein 1                                               |
| maker-7-augustus-gene-222.64-mRNA-1 | Japonica | NA       |               | Os07g0563800 | OsR498G0714583800.01.T01 | ADP-ribosylation factor GTPase-activating protein AGD5                         |
| maker-7-augustus-gene-223.43-mRNA-1 | Japonica | NA       |               | Os07g0565600 | OsR498G0714589500.01.T01 | Peptidylprolyl isomerase                                                       |
| maker-7-augustus-gene-223.49-mRNA-1 | Japonica | NA       |               | Os07g0564600 | OsR498G0714586200.01.T03 | Secretory carrier-associated membrane protein 1                                |
| maker-7-augustus-gene-223.55-mRNA-1 | Japonica | NA       |               |              | OsR498G0714586800.01.T02 | HOPM interactor 7                                                              |
| maker-7-augustus-gene-223.63-mRNA-1 | Japonica | NA       |               | Os07g0564800 | OsR498G0714587200.01.T02 | Bromodomain 4                                                                  |
| maker-7-augustus-gene-223.66-mRNA-1 | Japonica | NA       |               | Os07g0565000 | OsR498G0714587200.01.T05 | 40S ribosomal protein S11                                                      |
| maker-7-augustus-gene-223.71-mRNA-1 | Japonica | NA       |               | Os07g0565300 | OsR498G0714588000.01.T02 | Bromo domain-containing protein                                                |
| maker-7-augustus-gene-223.74-mRNA-1 | Japonica | NA       | Kinase-LRR-TM |              | OsR498G0714588200.01.T01 | Protein kinase domain-containing protein                                       |
| maker-7-augustus-gene-223.81-mRNA-1 | Japonica | NA       |               |              | OsR498G0714589200.01.T01 | Polyamine oxidase 3                                                            |
| maker-7-augustus-gene-224.38-mRNA-1 | Japonica | NA       |               |              | OsR498G0714593700.01.T01 | Obtusifoliol 14-alpha demethylase                                              |
| maker-7-augustus-gene-224.40-mRNA-1 | Japonica | NA       |               |              |                          | CYSTM domain-containing protein (Fragment)                                     |
| maker-7-augustus-gene-224.42-mRNA-1 | Japonica | NA       |               | Os07g0566200 | OsR498G0714591800.01.T05 | Pyruvate dehydrogenase phosphatase                                             |
| maker-7-augustus-gene-224.48-mRNA-1 | Japonica | Indica   | TIR           | Os07g0566800 | OsR498G0714593200.01.T01 | TIR domain-containing protein (Fragment)                                       |
| maker-7-augustus-gene-224.50-mRNA-1 | Japonica | Japonica |               | Os07g0567300 | OsR498G0714594400.01.T01 | Putative glycosyltransferase, DXD sugar-binding, alpha 1,4-glycosyltransferase |
| maker-7-augustus-gene-224.56-mRNA-1 | Japonica | NA       |               |              | OsR498G0714594600.01.T01 | Cytochrome c domain-containing protein (Fragment)                              |
| maker-7-augustus-gene-225.38-mRNA-1 | Japonica | NA       | Kinase-LRR-TM | Os07g0568100 | OsR498G0714596100.01.T01 | Nodulation receptor kinase A                                                   |
| maker-7-augustus-gene-225.41-mRNA-1 | Japonica | Japonica |               | Os07g0569000 | OsR498G0714601100.01.T01 |                                                                                |
| maker-7-augustus-gene-225.44-mRNA-1 | Japonica | NA       |               | Os07g0568000 | OsR498G0714596000.01.T01 | Exocyst complex component 8                                                    |
| maker-7-augustus-gene-225.49-mRNA-1 | Japonica | NA       |               | Os07g0568200 | OsR498G0714596400.01.T01 | SANT domain-containing protein (Fragment)                                      |
| maker-7-augustus-gene-225.52-mRNA-1 | Japonica | NA       |               |              | OsR498G0714597400.01.T01 | GRAS domain-containing protein                                                 |
| maker-7-augustus-gene-225.57-mRNA-1 | Japonica | Indica   |               | Os07g0568500 | OsR498G0714597800.01.T03 | Calcium-dependent protein kinase 20                                            |
| maker-7-augustus-gene-225.59-mRNA-1 | Japonica | NA       |               | Os07g0568600 | OsR498G0714598000.01.T01 | Calcium-dependent protein kinase                                               |
| maker-7-augustus-gene-225.64-mRNA-1 | Japonica | NA       |               | Os07g0568900 | OsR498G0714600800.01.T02 |                                                                                |
| maker-7-augustus-gene-225.67-mRNA-1 | Japonica | NA       |               | Os07g0569100 | OsR498G0714601400.01.T02 | Remorin like                                                                   |
| maker-7-augustus-gene-226.25-mRNA-1 | Japonica | NA       |               |              | OsR498G0714602700.01.T01 | Zinc finger transcription factor                                               |
| maker-7-augustus-gene-226.27-mRNA-1 | Japonica | NA       |               | Os07g0570700 | OsR498G0714604900.01.T01 | Ribosome-recycling factor, chloroplastic                                       |
| maker-7-augustus-gene-226.32-mRNA-1 | Japonica | NA       |               | Os07g0569600 | OsR498G0714602000.01.T04 | Chaperonin-like RbcX protein 2, chloroplastic                                  |
| maker-7-augustus-gene-226.34-mRNA-1 | Japonica | NA       |               |              |                          | Zinc-metallopeptidase, peroxisomal                                             |
| maker-7-augustus-gene-226.40-mRNA-1 | Japonica | NA       |               | Os07g0570300 | OsR498G0714603600.01.T02 | Insulin-degrading enzyme-like 1 peroxisomal                                    |
| maker-7-augustus-gene-226.49-mRNA-1 | Japonica | NA       |               | Os07g0570300 | OsR498G0714603600.01.T02 | Zinc-metallopeptidase, peroxisomal                                             |
| maker-7-augustus-gene-226.52-mRNA-1 | Japonica | Indica   |               | Os07g0570300 | OsR498G0714604000.01.T02 | Insulinase (Peptidase family M16) family protein isoform 1                     |
| maker-7-augustus-gene-226.56-mRNA-1 | Japonica | Indica   |               | Os07g0570550 | OsR498G0714604600.01.T01 | Phytocyanin domain-containing protein                                          |
| maker-7-augustus-gene-227.0-mRNA-1  | Japonica | NA       |               |              | OsR498G0714608700.01.T01 | INNER NO OUTER                                                                 |
| maker-7-augustus-gene-227.11-mRNA-1 | Japonica | NA       |               | Os07g0572500 | OsR498G0714610900.01.T01 | F-box domain containing protein-like                                           |
| maker-7-augustus-gene-227.12-mRNA-1 | Japonica | Indica   |               | Os07g0571100 | OsR498G0714606400.01.T05 | Protein TIME FOR COFFEE                                                        |
| maker-7-augustus-gene-227.27-mRNA-1 | Japonica | NA       |               | Os07g0571900 | OsR498G0714609200.01.T01 | Pre-mRNA-splicing factor 18                                                    |
| maker-7-augustus-gene-228.0-mRNA-1  | Japonica | NA       |               | Os07g0572600 | OsR498G0714611100.01.T01 | O-fucosyltransferase family protein (Fragment)                                 |
| maker-7-augustus-gene-228.2-mRNA-1  | Japonica | NA       | Kinase-TM     | Os07g0572800 | OsR498G0714612300.01.T06 | Serine/threonine-protein kinase WNK1                                           |

|                                     |          |          |               |              |                          |                                                                                 |
|-------------------------------------|----------|----------|---------------|--------------|--------------------------|---------------------------------------------------------------------------------|
| maker-7-augustus-gene-229.43-mRNA-1 | Japonica | NA       | NBS           | Os07g0573100 | OsR498G0714613100.01.T02 | Adenylyl-sulfate kinase                                                         |
| maker-7-augustus-gene-229.52-mRNA-1 | Japonica | NA       |               | Os07g0573400 | OsR498G0714613900.01.T02 | Neprosin 1                                                                      |
| maker-7-augustus-gene-229.57-mRNA-1 | Japonica | Japonica |               | Os07g0574633 | OsR498G0714617700.01.T01 | Ubiquitin-like domain-containing protein                                        |
| maker-7-augustus-gene-229.59-mRNA-1 | Japonica | NA       |               | Os07g0574800 | OsR498G0714619100.01.T01 | Tubulin alpha chain                                                             |
| maker-7-augustus-gene-229.63-mRNA-1 | Japonica | NA       |               | Os07g0573600 | OsR498G0714614400.01.T01 | RNA polymerase II transcription factor B subunit 5                              |
| maker-7-augustus-gene-229.65-mRNA-1 | Japonica | NA       |               | Os07g0573700 | OsR498G0714614600.01.T01 | Nucleotide-sugar transporter                                                    |
| maker-7-augustus-gene-229.70-mRNA-1 | Japonica | NA       |               | Os07g0573800 | OsR498G0714615200.01.T01 | Root border cell-specific protein (Fragment)                                    |
| maker-7-augustus-gene-229.75-mRNA-1 | Japonica | Indica   | Kinase-LRR-TM | Os07g0574100 | OsR498G0714615800.01.T01 | Receptor-kinase isolog                                                          |
| maker-7-augustus-gene-23.19-mRNA-1  | Japonica | NA       |               |              | OsR498G0713525900.01.T01 | Inositol transporter like                                                       |
| maker-7-augustus-gene-23.23-mRNA-1  | Japonica | NA       |               | Os07g0151300 | OsR498G0713526100.01.T01 | melanoma-associated antigen 2                                                   |
| maker-7-augustus-gene-23.25-mRNA-1  | Japonica | Japonica |               | Os07g0151700 | OsR498G0713527500.01.T01 |                                                                                 |
| maker-7-augustus-gene-23.27-mRNA-1  | Japonica | Indica   |               | Os07g0151800 | OsR498G0713527200.01.T01 |                                                                                 |
| maker-7-augustus-gene-230.0-mRNA-1  | Japonica | NA       |               |              | OsR498G0714621300.01.T05 | Pheophytinase, chloroplastic                                                    |
| maker-7-augustus-gene-230.10-mRNA-1 | Japonica | NA       |               | Os07g0575100 | OsR498G0714619800.01.T01 | Importin-5 isoform A                                                            |
| maker-7-augustus-gene-230.17-mRNA-1 | Japonica | NA       |               | Os07g0575500 | OsR498G0714620200.01.T01 | Beta-N-acetylhexosaminidase                                                     |
| maker-7-augustus-gene-230.5-mRNA-1  | Japonica | NA       |               | Os07g0575900 | OsR498G0714621700.01.T01 | Vacuolar protein sorting-associated protein 62                                  |
| maker-7-augustus-gene-230.7-mRNA-1  | Japonica | NA       |               | Os07g0576000 | OsR498G0714621900.01.T01 | Homogentisate solanesyltransferase chloroplastic                                |
| maker-7-augustus-gene-231.48-mRNA-1 | Japonica | NA       |               | Os07g0577600 | OsR498G0714623900.01.T01 | Chlorophyll a-b binding protein, chloroplastic                                  |
| maker-7-augustus-gene-231.53-mRNA-1 | Japonica | NA       |               |              | OsR498G0714624100.01.T01 | Succinate--CoA ligase [ADP-forming] subunit alpha-1 mitochondrial               |
| maker-7-augustus-gene-231.56-mRNA-1 | Japonica | NA       |               | Os07g0578200 | OsR498G0714626700.01.T03 | Major facilitator superfamily domain-containing protein 12                      |
| maker-7-augustus-gene-231.62-mRNA-1 | Japonica | NA       |               | Os07g0577900 | OsR498G0714625600.01.T01 | t-SNARE coiled-coil homology domain-containing protein (Fragment)               |
| maker-7-augustus-gene-232.0-mRNA-1  | Japonica | NA       |               | Os07g0578600 | OsR498G0714628300.01.T01 | 5-formyltetrahydrofolate cycloligase                                            |
| maker-7-augustus-gene-232.16-mRNA-1 | Japonica | NA       |               | Os07g0580900 | OsR498G0714634400.01.T03 | Geranyl diphosphate synthase large subunit                                      |
| maker-7-augustus-gene-232.18-mRNA-1 | Japonica | NA       |               | Os07g0581000 | OsR498G0714634800.01.T01 | Bi-functional UDP-rhamnose/UDP-galactose transporter                            |
| maker-7-augustus-gene-232.4-mRNA-1  | Japonica | NA       |               | Os07g0578800 | OsR498G0714628800.01.T03 | Pentatricopeptide repeat-containing protein, mitochondrial                      |
| maker-7-augustus-gene-233.41-mRNA-1 | Japonica | NA       |               | Os06g0186900 | OsR498G0611743800.01.T01 | RuvB-like helicase                                                              |
| maker-7-augustus-gene-233.43-mRNA-1 | Japonica | NA       |               |              |                          |                                                                                 |
| maker-7-augustus-gene-233.50-mRNA-1 | Japonica | NA       |               | Os07g0581700 | OsR498G0714639300.01.T01 | Homeodomain leucine zipper protein class 1                                      |
| maker-7-augustus-gene-233.52-mRNA-1 | Japonica | NA       |               | Os07g0582400 | OsR498G0714641300.01.T01 | Polyol transporter 5                                                            |
| maker-7-augustus-gene-233.55-mRNA-1 | Japonica | NA       |               | Os07g0582500 | OsR498G0714641600.01.T01 | Polyol transporter 5                                                            |
| maker-7-augustus-gene-233.57-mRNA-1 | Japonica | NA       |               | Os07g0582850 | OsR498G0714642200.01.T01 | MFS domain-containing protein                                                   |
| maker-7-augustus-gene-234.0-mRNA-1  | Japonica | NA       |               | Os07g0583200 | OsR498G0714643900.01.T01 | Mitochondrial transcription termination factor                                  |
| maker-7-augustus-gene-234.11-mRNA-1 | Japonica | Indica   |               | Os07g0584200 | OsR498G0714647700.01.T01 | BTB/POZ domain-containing protein At5g48130                                     |
| maker-7-augustus-gene-234.14-mRNA-1 | Japonica | NA       |               | Os07g0584500 | OsR498G0714649100.01.T01 | RNA-binding (RRM/RBD/RNP motifs) family protein                                 |
| maker-7-augustus-gene-234.16-mRNA-1 | Japonica | NA       |               |              | OsR498G0714644200.01.T01 | Zinc finger CCCH domain-containing protein 18                                   |
| maker-7-augustus-gene-234.20-mRNA-1 | Japonica | Japonica |               | Os07g0583500 | OsR498G0714645200.01.T04 | rRNA N-glycosidase                                                              |
| maker-7-augustus-gene-234.23-mRNA-1 | Japonica | NA       |               | Os07g0583700 | OsR498G0714646200.01.T01 | WRKY17 transcription factor                                                     |
| maker-7-augustus-gene-234.3-mRNA-1  | Japonica | NA       |               |              | OsR498G0714644900.01.T01 | GRF zinc finger family protein                                                  |
| maker-7-augustus-gene-234.5-mRNA-1  | Japonica | NA       |               |              | OsR498G0714646900.01.T02 | Yippee domain-containing protein                                                |
| maker-7-augustus-gene-234.9-mRNA-1  | Japonica | NA       | Kinase        | Os07g0584100 | OsR498G0714647100.01.T01 | probable serine/threonine-protein kinase WNK11                                  |
| maker-7-augustus-gene-235.0-mRNA-1  | Japonica | NA       |               | Os07g0584900 | OsR498G0714650500.01.T01 | U-box domain-containing protein 4                                               |
| maker-7-augustus-gene-235.11-mRNA-1 | Japonica | NA       |               | Os07g0585250 | OsR498G0714652400.01.T01 | AAI domain-containing protein                                                   |
| maker-7-augustus-gene-235.19-mRNA-1 | Japonica | NA       |               | Os07g0585800 | OsR498G0714655400.01.T01 | NADH dehydrogenase [ubiquinone] iron-sulfur protein 4, mitochondrial            |
| maker-7-augustus-gene-235.23-mRNA-1 | Japonica | Indica   |               | Os01g0593100 | OsR498G0714656200.01.T02 | A-kinase anchor protein like (Fragment)                                         |
| maker-7-augustus-gene-235.27-mRNA-1 | Japonica | Indica   |               | Os07g0586100 | OsR498G0714656600.01.T02 | Gdsl esteraselipase                                                             |
| maker-7-augustus-gene-235.8-mRNA-1  | Japonica | NA       |               |              |                          | CYSTM domain-containing protein                                                 |
| maker-7-augustus-gene-236.32-mRNA-1 | Japonica | Indica   |               | Os07g0586500 | OsR498G0714657900.01.T03 | SUMO-activating enzyme subunit                                                  |
| maker-7-augustus-gene-236.41-mRNA-1 | Japonica | Japonica |               | Os07g0586200 | OsR498G0714656800.01.T02 | GDLS esterase/lipase                                                            |
| maker-7-augustus-gene-236.44-mRNA-1 | Japonica | NA       |               | Os07g0586700 | OsR498G0714663400.01.T01 | GIY-YIG domain-containing protein                                               |
| maker-7-augustus-gene-236.46-mRNA-1 | Japonica | NA       |               | Os07g0587100 | OsR498G0714663400.01.T01 | Glycosyltransferase                                                             |
| maker-7-augustus-gene-236.48-mRNA-1 | Japonica | NA       |               |              | OsR498G0714663800.01.T01 | NPH3 domain-containing protein (Fragment)                                       |
| maker-7-augustus-gene-237.32-mRNA-1 | Japonica | NA       |               | Os07g0588000 | OsR498G0714667100.01.T03 | Interferon-related developmental regulator family protein / IFRD protein family |
| maker-7-augustus-gene-237.38-mRNA-1 | Japonica | NA       |               | Os07g0588200 | OsR498G0714668100.01.T01 | Formin-like protein 13                                                          |
| maker-7-augustus-gene-237.40-mRNA-1 | Japonica | Japonica |               | Os07g0588300 | OsR498G0714668300.01.T01 |                                                                                 |
| maker-7-augustus-gene-237.43-mRNA-1 | Japonica | NA       |               | Os07g0588500 | OsR498G0714669100.01.T02 | Mitotic checkpoint protein like                                                 |
| maker-7-augustus-gene-237.49-mRNA-1 | Japonica | NA       |               | Os03g0793100 | OsR498G1119421100.01.T02 | Glycosyltransferases                                                            |
| maker-7-augustus-gene-237.52-mRNA-1 | Japonica | NA       |               |              | OsR498G0714668600.01.T01 | Transcription factor bHLH84 like                                                |
| maker-7-augustus-gene-238.0-mRNA-1  | Japonica | Japonica |               | Os07g0589400 | OsR498G0714672700.01.T01 | Protein ANTHESIS POMOTING FACTOR 1                                              |
| maker-7-augustus-gene-238.6-mRNA-1  | Japonica | NA       |               |              | OsR498G0714678500.01.T01 |                                                                                 |
| maker-7-augustus-gene-239.14-mRNA-1 | Japonica | Indica   |               | Os07g0593200 | OsR498G0714684600.01.T02 | SWIM-type domain-containing protein (Fragment)                                  |
| maker-7-augustus-gene-239.2-mRNA-1  | Japonica | NA       |               |              |                          | WPP domain-containing protein 2                                                 |

|                                     |          |          |               |              |                          |                                                                    |
|-------------------------------------|----------|----------|---------------|--------------|--------------------------|--------------------------------------------------------------------|
| maker-7-augustus-gene-239.4-mRNA-1  | Japonica | NA       |               |              | OsR498G0714687300.01.T01 |                                                                    |
| maker-7-augustus-gene-239.7-mRNA-1  | Japonica | NA       |               | Os07g0592200 |                          | Aspartic proteinase-like protein 2                                 |
| maker-7-augustus-gene-239.9-mRNA-1  | Japonica | NA       |               | Os07g0592300 | OsR498G0714682000.01.T03 | Peptidase A1 domain-containing protein                             |
| maker-7-augustus-gene-240.35-mRNA-1 | Japonica | NA       |               | Os07g0595800 | OsR498G0714690500.01.T02 | Putative transcriptional regulator UXT                             |
| maker-7-augustus-gene-240.39-mRNA-1 | Japonica | NA       |               | Os07g0598900 | OsR498G0714702700.01.T04 | COBW domain-containing protein 1                                   |
| maker-7-augustus-gene-240.43-mRNA-1 | Japonica | NA       |               |              |                          | Flavonoid 3'-monooxygenase                                         |
| maker-7-augustus-gene-240.45-mRNA-1 | Japonica | NA       |               |              | OsR498G0714689400.01.T01 | cobW domain-containing protein                                     |
| maker-7-augustus-gene-240.47-mRNA-1 | Japonica | Indica   |               | Os07g0595700 | OsR498G0714690400.01.T01 |                                                                    |
| maker-7-augustus-gene-240.49-mRNA-1 | Japonica | NA       |               |              | OsR498G0714691200.01.T01 | S-acyltransferase                                                  |
| maker-7-augustus-gene-240.55-mRNA-1 | Japonica | NA       |               |              | OsR498G0714692000.01.T05 | Formin-like protein 20 isoform I (Fragment)                        |
| maker-7-augustus-gene-240.62-mRNA-1 | Japonica | NA       | Kinase        | Os07g0596600 | OsR498G0714693400.01.T01 | Putative serine/threonine-protein kinase                           |
| maker-7-augustus-gene-240.65-mRNA-1 | Japonica | NA       |               | Os07g0596900 | OsR498G0714695200.01.T01 | WRKY transcription factor                                          |
| maker-7-augustus-gene-241.0-mRNA-1  | Japonica | NA       |               |              | OsR498G0714696100.01.T01 | Mitochondrial saccharopine dehydrogenase                           |
| maker-7-augustus-gene-241.17-mRNA-1 | Japonica | NA       |               | Os07g0597000 | OsR498G0714695600.01.T02 | Eukaryotic translation initiation factor 5A                        |
| maker-7-augustus-gene-241.21-mRNA-1 | Japonica | NA       | Kinase-LRR-TM | Os07g0597200 | OsR498G0714696400.01.T01 | Leucine-rich repeat transmembrane protein kinase                   |
| maker-7-augustus-gene-241.24-mRNA-1 | Japonica | NA       |               | Os07g0598400 | OsR498G0714700600.01.T01 | heparanase-like protein 2                                          |
| maker-7-augustus-gene-241.26-mRNA-1 | Japonica | NA       |               | Os07g0598500 | OsR498G0714700800.01.T01 | Pentatricopeptide repeat-containing protein mitochondrial          |
| maker-7-augustus-gene-241.8-mRNA-1  | Japonica | NA       |               | Os07g0598300 | OsR498G0714700300.01.T01 | Helicase ATP-binding domain-containing protein                     |
| maker-7-augustus-gene-242.39-mRNA-1 | Japonica | NA       |               |              | OsR498G0714702700.01.T05 | COBW domain-containing protein 1                                   |
| maker-7-augustus-gene-242.44-mRNA-1 | Japonica | NA       |               | Os07g0599000 | OsR498G0714702900.01.T01 | Pentatricopeptide repeat-containing protein mitochondrial          |
| maker-7-augustus-gene-242.47-mRNA-1 | Japonica | NA       |               | Os07g0600700 | OsR498G0714708100.01.T01 | X8 domain-containing protein                                       |
| maker-7-augustus-gene-243.44-mRNA-1 | Japonica | NA       |               | Os07g0601000 | OsR498G0714708800.01.T01 | Epimerase domain-containing protein                                |
| maker-7-augustus-gene-243.47-mRNA-1 | Japonica | Japonica |               | Os07g0601100 | OsR498G0714709000.01.T01 | Epimerase domain-containing protein                                |
| maker-7-augustus-gene-243.48-mRNA-1 | Japonica | NA       |               | Os07g0601100 | OsR498G0714709000.01.T01 | Epimerase domain-containing protein                                |
| maker-7-augustus-gene-243.51-mRNA-1 | Japonica | Indica   |               | Os07g0602000 | OsR498G0714710800.01.T01 | Dihydroflavonol-4-reductase                                        |
| maker-7-augustus-gene-243.54-mRNA-1 | Japonica | NA       |               | Os07g0602000 | OsR498G0714711200.01.T01 | Epimerase domain-containing protein                                |
| maker-7-augustus-gene-244.33-mRNA-1 | Japonica | Indica   |               | Os07g0602900 | OsR498G0714715000.01.T01 | Ninja-family protein 6                                             |
| maker-7-augustus-gene-244.40-mRNA-1 | Japonica | NA       |               | Os07g0603300 | OsR498G0714717400.01.T02 | Transcription initiation factor IIB                                |
| maker-7-augustus-gene-245.31-mRNA-1 | Japonica | Indica   |               | Os07g0603600 | OsR498G0714720100.01.T01 | Methylesterase 11, chloroplastic                                   |
| maker-7-augustus-gene-245.34-mRNA-1 | Japonica | NA       |               | Os07g0603700 | OsR498G0714720500.01.T01 | Cytochrome P450, family 78, subfamily A, polypeptide 10 (Fragment) |
| maker-7-augustus-gene-245.36-mRNA-1 | Japonica | NA       |               | Os07g0603800 | OsR498G0714721100.01.T03 | Peptide transporter PTR2                                           |
| maker-7-augustus-gene-245.40-mRNA-1 | Japonica | Indica   |               | Os07g0604000 | OsR498G0714722100.01.T05 | Probable 6-phosphogluconolactonase                                 |
| maker-7-augustus-gene-245.46-mRNA-1 | Japonica | Japonica |               | Os07g0604600 | OsR498G0714724100.01.T01 |                                                                    |
| maker-7-augustus-gene-245.50-mRNA-1 | Japonica | NA       |               | Os07g0604800 | OsR498G0714724500.01.T01 | UDP-arabinopyranose mutase                                         |
| maker-7-augustus-gene-245.53-mRNA-1 | Japonica | NA       |               |              |                          | COBRA-like protein 5                                               |
| maker-7-augustus-gene-247.44-mRNA-1 | Japonica | NA       |               |              |                          | Dead box ATP-dependent RNA helicase                                |
| maker-7-augustus-gene-247.53-mRNA-1 | Japonica | Indica   |               | Os07g0607700 | OsR498G0714733700.01.T03 | Alkyl transferase                                                  |
| maker-7-augustus-gene-247.55-mRNA-1 | Japonica | NA       |               |              | OsR498G0714734700.01.T03 | Acidic leucine-rich nuclear phosphoprotein 32-related protein 1    |
| maker-7-augustus-gene-247.60-mRNA-1 | Japonica | Japonica |               | Os07g0606900 | OsR498G0714731400.01.T01 | Translation initiation factor IF-2-like                            |
| maker-7-augustus-gene-247.63-mRNA-1 | Japonica | NA       |               |              | OsR498G0714732800.01.T03 |                                                                    |
| maker-7-augustus-gene-247.66-mRNA-1 | Japonica | NA       |               | Os07g0607400 | OsR498G0714733400.01.T02 | Pectinesterase                                                     |
| maker-7-augustus-gene-247.69-mRNA-1 | Japonica | NA       |               | Os07g0607500 | OsR498G0714733600.01.T01 | ATP-dependent Clp protease proteolytic subunit                     |
| maker-7-augustus-gene-247.70-mRNA-1 | Japonica | NA       |               |              | OsR498G0714733600.01.T02 |                                                                    |
| maker-7-augustus-gene-247.75-mRNA-1 | Japonica | NA       |               | Os07g0608200 | OsR498G0714735400.01.T02 | CCAAT-binding transcription factor B                               |
| maker-7-augustus-gene-248.38-mRNA-1 | Japonica | Indica   |               | Os07g0608300 | OsR498G0714736100.01.T03 | Alpha/beta hydrolase domain-containing protein WAV2                |
| maker-7-augustus-gene-248.42-mRNA-1 | Japonica | NA       |               | Os07g0608400 | OsR498G0714736300.01.T01 | PHD finger protein ALFIN-LIKE 5, N-terminally processed like       |
| maker-7-augustus-gene-248.46-mRNA-1 | Japonica | NA       |               | Os07g0608800 | OsR498G0714737100.01.T01 | Peroxisome biogenesis factor                                       |
| maker-7-augustus-gene-248.50-mRNA-1 | Japonica | NA       |               | Os07g0608500 | OsR498G0714736800.01.T01 | KH type-2 domain-containing protein (Fragment)                     |
| maker-7-augustus-gene-248.55-mRNA-1 | Japonica | Indica   |               | Os07g0608700 | OsR498G0714737000.01.T01 | Small nuclear ribonucleoprotein G                                  |
| maker-7-augustus-gene-249.0-mRNA-1  | Japonica | NA       |               | Os07g0609766 | OsR498G0714738100.01.T01 | Armadillo repeat-containing protein LFR                            |
| maker-7-augustus-gene-249.4-mRNA-1  | Japonica | NA       |               | Os07g0611600 | OsR498G0714741100.01.T01 | DNA-directed RNA polymerase III subunit                            |
| maker-7-augustus-gene-250.0-mRNA-1  | Japonica | Indica   |               | Os07g0611700 | OsR498G0714741500.01.T02 |                                                                    |
| maker-7-augustus-gene-250.12-mRNA-1 | Japonica | NA       |               | Os07g0614000 | OsR498G0714747900.01.T01 | Strictosidine synthase                                             |
| maker-7-augustus-gene-250.13-mRNA-1 | Japonica | Indica   |               | Os07g0614000 | OsR498G0714748500.01.T01 | Strictosidine synthase                                             |
| maker-7-augustus-gene-250.24-mRNA-1 | Japonica | NA       |               | Os07g0612400 | OsR498G0714741800.01.T02 | Catalytic/ hydrolase                                               |
| maker-7-augustus-gene-250.25-mRNA-1 | Japonica | NA       |               | Os07g0612500 | OsR498G0714742400.01.T01 |                                                                    |
| maker-7-augustus-gene-250.28-mRNA-1 | Japonica | NA       |               |              | OsR498G0714743600.01.T01 | GTP diphosphokinase                                                |
| maker-7-augustus-gene-250.3-mRNA-1  | Japonica | NA       |               | Os07g0613300 | OsR498G0714744100.01.T04 | Exportin-T                                                         |
| maker-7-augustus-gene-250.32-mRNA-1 | Japonica | NA       |               | Os07g0614100 | OsR498G0714748200.01.T02 | Proteasome endopeptidase complex                                   |
| maker-7-augustus-gene-250.8-mRNA-1  | Japonica | NA       | Kinase-TM     | Os07g0613500 | OsR498G0714745300.01.T02 | Serine/threonine-protein kinase RPK                                |
| maker-7-augustus-gene-251.36-mRNA-1 | Japonica | Japonica |               | Os07g0614400 | OsR498G0714749700.01.T01 | Dof zinc finger protein like                                       |

|                                     |          |          |               |              |                          |                                                                      |
|-------------------------------------|----------|----------|---------------|--------------|--------------------------|----------------------------------------------------------------------|
| maker-7-augustus-gene-251.39-mRNA-1 | Japonica | NA       |               |              | OsR498G0714750700.01.T01 | Transmembrane protein like                                           |
| maker-7-augustus-gene-251.42-mRNA-1 | Japonica | NA       |               | Os07g0615200 | OsR498G0714752500.01.T05 | Tify domain-containing protein                                       |
| maker-7-augustus-gene-251.45-mRNA-1 | Japonica | NA       |               | Os07g0615400 | OsR498G0714753100.01.T01 | Apoptosis-promoting RNA-binding protein TIA-1/TIAR (RRM superfamily) |
| maker-7-augustus-gene-251.54-mRNA-1 | Japonica | NA       |               | Os07g0616000 | OsR498G0714754700.01.T03 | Erect panical 2                                                      |
| maker-7-augustus-gene-251.58-mRNA-1 | Japonica | NA       |               | Os07g0614500 | OsR498G0714750200.01.T01 | Translational elongation factor 1 subunit Bbeta                      |
| maker-7-augustus-gene-251.61-mRNA-1 | Japonica | Indica   |               | Os03g0406100 | OsR498G0714751200.01.T04 | SPX domain-containing protein 6                                      |
| maker-7-augustus-gene-251.63-mRNA-1 | Japonica | NA       |               | Os07g0615500 | OsR498G0714753400.01.T01 | FLZ-type domain-containing protein                                   |
| maker-7-augustus-gene-251.67-mRNA-1 | Japonica | NA       |               | Os07g0616200 | OsR498G0714755000.01.T01 | Beta-ketoacyl-[acyl-carrier-protein] synthase I                      |
| maker-7-augustus-gene-252.31-mRNA-1 | Japonica | NA       |               | Os07g0616800 | OsR498G0714758500.01.T02 | Sucrose synthase                                                     |
| maker-7-augustus-gene-252.33-mRNA-1 | Japonica | NA       |               | Os07g0616900 | OsR498G0714758700.01.T01 | FYVE-type domain-containing protein                                  |
| maker-7-augustus-gene-252.36-mRNA-1 | Japonica | NA       |               | Os07g0616600 | OsR498G0714756800.01.T01 | 40S ribosomal protein SA                                             |
| maker-7-augustus-gene-252.41-mRNA-1 | Japonica | NA       |               | Os07g0617000 | OsR498G0714759000.01.T01 | Ethylene signal transcription factor                                 |
| maker-7-augustus-gene-252.43-mRNA-1 | Japonica | Indica   |               | Os07g0617800 | OsR498G0714762200.01.T01 | Alanine aminotransferase                                             |
| maker-7-augustus-gene-253.31-mRNA-1 | Japonica | NA       | Kinase-LRR-TM | Os07g0618400 | OsR498G0714763500.01.T01 | Protein STRUBBELIG-RECEPTOR FAMILY 7                                 |
| maker-7-augustus-gene-253.38-mRNA-1 | Japonica | NA       |               | Os07g0618500 | OsR498G0714763700.01.T06 | 6-hydroxymethyl-7,8-dihydropterin pyrophosphokinase                  |
| maker-7-augustus-gene-253.40-mRNA-1 | Japonica | NA       |               | Os07g0618600 | OsR498G0714763900.01.T01 | Lateral signaling target protein                                     |
| maker-7-augustus-gene-253.44-mRNA-1 | Japonica | NA       |               | Os07g0618800 | OsR498G0714764300.01.T01 | Calcium-binding protein CML20                                        |
| maker-7-augustus-gene-253.49-mRNA-1 | Japonica | NA       |               | Os07g0619100 | OsR498G0714765100.01.T02 | Protein WEAK CHLOROPLAST MOVEMENT UNDER BLUE LIGHT 1                 |
| maker-7-augustus-gene-252.33-mRNA-1 | Japonica | NA       |               |              |                          | DDT domain-containing protein                                        |
| maker-7-augustus-gene-254.0-mRNA-1  | Japonica | NA       |               | Os07g0620300 | OsR498G0714770500.01.T02 | Adaptor protein complex 4 subunit u                                  |
| maker-7-augustus-gene-254.14-mRNA-1 | Japonica | Indica   |               | Os07g0619800 | OsR498G0714768800.01.T02 | Calcium dependent protein kinase 5                                   |
| maker-7-augustus-gene-254.19-mRNA-1 | Japonica | NA       |               | Os07g0620400 | OsR498G0714770800.01.T01 | ADP-ribosylation factor-related protein 1                            |
| maker-7-augustus-gene-254.22-mRNA-1 | Japonica | NA       |               | Os07g0620800 | OsR498G0714772200.01.T02 | Cyclin N-terminal domain-containing protein                          |
| maker-7-augustus-gene-254.26-mRNA-1 | Japonica | NA       |               |              | OsR498G0714773600.01.T03 | RNA helicase                                                         |
| maker-7-augustus-gene-254.28-mRNA-1 | Japonica | NA       |               |              | OsR498G0714773800.01.T01 | Cytochrome c oxidase subunit                                         |
| maker-7-augustus-gene-254.6-mRNA-1  | Japonica | Indica   |               | Os07g0621300 | OsR498G0714773300.01.T01 | GRAM domain-containing protein                                       |
| maker-7-augustus-gene-254.9-mRNA-1  | Japonica | Indica   |               | Os07g0619700 | OsR498G0714768600.01.T02 | Zinc finger CCH domain-containing protein 62                         |
| maker-7-augustus-gene-255.26-mRNA-1 | Japonica | NA       | Kinase-TM     |              |                          | Serine/threonine-protein kinase SRK2C                                |
| maker-7-augustus-gene-255.34-mRNA-1 | Japonica | NA       |               | Os07g0622300 |                          | Glycosyltransferase                                                  |
| maker-7-augustus-gene-255.37-mRNA-1 | Japonica | Japonica |               | Os07g0623200 | OsR498G0306074200.01.T01 | HMA domain-containing protein (Fragment)                             |
| maker-7-augustus-gene-255.40-mRNA-1 | Japonica | NA       |               | Os07g0623300 | OsR498G0714779900.01.T06 | Serine/arginine-rich splicing factor 2                               |
| maker-7-augustus-gene-255.45-mRNA-1 | Japonica | NA       |               | Os07g0622200 | OsR498G0714775600.01.T01 | Phospho-2-dehydro-3-deoxyheptonate aldolase                          |
| maker-7-augustus-gene-255.51-mRNA-1 | Japonica | NA       |               |              | OsR498G0714779000.01.T02 | Calmodulin-binding transcription activator 1                         |
| maker-7-augustus-gene-255.57-mRNA-1 | Japonica | Indica   |               | Os07g0623400 | OsR498G0714780200.01.T03 | Transcription elongation factor SPT4 isogeny 2                       |
| maker-7-augustus-gene-255.61-mRNA-1 | Japonica | NA       |               | Os07g0623600 | OsR498G0714780600.01.T01 | N-lysine methyltransferase SEE1                                      |
| maker-7-augustus-gene-256.0-mRNA-1  | Japonica | NA       |               | Os07g0624600 | OsR498G0714783700.01.T01 | Trehalose 6-phosphate phosphatase                                    |
| maker-7-augustus-gene-256.2-mRNA-1  | Japonica | NA       |               | Os07g0624100 |                          | BED zinc finger family protein, expressed                            |
| maker-7-augustus-gene-256.7-mRNA-1  | Japonica | NA       |               |              | OsR498G0714785000.01.T03 | Adenylate kinase                                                     |
| maker-7-augustus-gene-257.42-mRNA-1 | Japonica | Indica   |               | Os07g0626200 | OsR498G0714789300.01.T01 | SAP domain-containing protein (Fragment)                             |
| maker-7-augustus-gene-257.46-mRNA-1 | Japonica | Indica   |               | Os07g0626300 | OsR498G0714789500.01.T01 | UV radiation resistance protein/autophagy-related protein 14         |
| maker-7-augustus-gene-257.52-mRNA-1 | Japonica | NA       |               | Os07g0626400 | OsR498G0714789700.01.T01 | J domain-containing protein (Fragment)                               |
| maker-7-augustus-gene-257.53-mRNA-1 | Japonica | NA       |               |              | OsR498G0714792500.01.T03 | E3 ubiquitin-protein ligase RKP                                      |
| maker-7-augustus-gene-257.73-mRNA-1 | Japonica | NA       |               |              | OsR498G0714793500.01.T01 | RRM domain-containing protein                                        |
| maker-7-augustus-gene-257.75-mRNA-1 | Japonica | NA       |               | Os07g0627300 | OsR498G0714794700.01.T02 | HTH myb-type domain-containing protein                               |
| maker-7-augustus-gene-257.79-mRNA-1 | Japonica | NA       |               | Os07g0627400 | OsR498G0714795100.01.T01 |                                                                      |
| maker-7-augustus-gene-257.81-mRNA-1 | Japonica | NA       |               | Os07g0625800 | OsR498G0714788600.01.T01 | AAI domain-containing protein                                        |
| maker-7-augustus-gene-257.83-mRNA-1 | Japonica | NA       | Kinase-LRR-TM | Os07g0626500 | OsR498G0714790400.01.T01 | Inactive receptor kinase                                             |
| maker-7-augustus-gene-257.86-mRNA-1 | Japonica | NA       |               | Os07g0626600 | OsR498G0714791600.01.T01 | Histone acetyltransferase                                            |
| maker-7-augustus-gene-258.0-mRNA-1  | Japonica | NA       |               | Os07g0627700 | OsR498G0714796200.01.T04 | Aldehyde oxygenase (deformylating)                                   |
| maker-7-augustus-gene-258.11-mRNA-1 | Japonica | NA       |               | Os07g0628500 | OsR498G0714798000.01.T02 | Transcription factor bHLH47                                          |
| maker-7-augustus-gene-258.14-mRNA-1 | Japonica | NA       |               | Os07g0628600 | OsR498G0714798400.01.T01 | Origin of replication complex subunit like                           |
| maker-7-augustus-gene-258.17-mRNA-1 | Japonica | NA       | Kinase-TM     | Os07g0628700 | OsR498G0714798600.01.T01 | Cysteine-rich receptor-like protein kinase 8                         |
| maker-7-augustus-gene-258.21-mRNA-1 | Japonica | NA       | Kinase-TM     | Os07g0628900 | OsR498G0714798800.01.T02 | Non-specific serine/threonine protein kinase                         |
| maker-7-augustus-gene-258.26-mRNA-1 | Japonica | Indica   |               | Os08g0437200 | OsR498G0714799400.01.T01 | MYB domain class transcription factor                                |
| maker-7-augustus-gene-258.3-mRNA-1  | Japonica | NA       |               | Os07g0627800 | OsR498G0714796600.01.T01 | Developmentally-regulated G-protein 3                                |
| maker-7-augustus-gene-258.9-mRNA-1  | Japonica | NA       |               |              | OsR498G0714796800.01.T01 | RRM domain-containing protein                                        |
| maker-7-augustus-gene-259.47-mRNA-1 | Japonica | NA       |               | Os07g0630400 | OsR498G0714803500.01.T01 | Ribonuclease 1                                                       |
| maker-7-augustus-gene-259.49-mRNA-1 | Japonica | NA       |               |              | OsR498G0714804100.01.T01 |                                                                      |
| maker-7-augustus-gene-259.51-mRNA-1 | Japonica | Indica   |               | Os07g0630900 | OsR498G0714805300.01.T01 | Putative mannan synthase 7                                           |
| maker-7-augustus-gene-259.56-mRNA-1 | Japonica | NA       |               | Os07g0631100 | OsR498G0714805700.01.T01 | Transcription elongation factor 1 homolog                            |
| maker-7-augustus-gene-259.59-mRNA-1 | Japonica | NA       |               | Os07g0631000 | OsR498G0714805600.01.T01 | Defective in cullin neddylation protein (Fragment)                   |

|                                     |          |          |           |              |                          |                                                                           |
|-------------------------------------|----------|----------|-----------|--------------|--------------------------|---------------------------------------------------------------------------|
| maker-7-augustus-gene-259.64-mRNA-1 | Japonica | NA       |           | Os07g0631300 |                          |                                                                           |
| maker-7-augustus-gene-260.44-mRNA-1 | Japonica | NA       |           | Os07g0631900 | OsR498G0714808700.01.T01 | Ribonucleoprotein A, chloroplastic                                        |
| maker-7-augustus-gene-260.51-mRNA-1 | Japonica | NA       |           | Os07g0632700 | OsR498G0714810900.01.T01 | Transmembrane emp24 domain-containing protein 10                          |
| maker-7-augustus-gene-260.54-mRNA-1 | Japonica | Japonica |           | Os07g0633000 | OsR498G0714811700.01.T01 | RRM domain-containing protein                                             |
| maker-7-augustus-gene-260.58-mRNA-1 | Japonica | NA       |           | Os07g0633200 | OsR498G0714812300.01.T01 | Arginine/serine-rich splicing factor SCL25B transcript IV                 |
| maker-7-augustus-gene-260.62-mRNA-1 | Japonica | NA       |           | Os07g0633400 | OsR498G0714813700.01.T01 | IQ domain-containing protein IQM6                                         |
| maker-7-augustus-gene-260.64-mRNA-1 | Japonica | NA       | Kinase-TM |              | OsR498G0714811200.01.T01 | serine/threonine-protein kinase STY8-like isoform X1                      |
| maker-7-augustus-gene-260.70-mRNA-1 | Japonica | NA       |           | Os07g0633100 | OsR498G0714812000.01.T02 | Glucan endo-1,3-beta-D-glucosidase                                        |
| maker-7-augustus-gene-260.72-mRNA-1 | Japonica | NA       |           | Os07g0633500 | OsR498G0714814000.01.T01 | Dead box ATP-dependent RNA helicase                                       |
| maker-7-augustus-gene-260.74-mRNA-1 | Japonica | Japonica |           | Os07g0634000 | OsR498G0714815000.01.T01 | SNARE associated Golgi protein family                                     |
| maker-7-augustus-gene-261.0-mRNA-1  | Japonica | NA       |           | Os07g0634200 | OsR498G0714816100.01.T02 | Ras-related protein ARA-4                                                 |
| maker-7-augustus-gene-261.11-mRNA-1 | Japonica | Indica   |           | Os07g0635200 | OsR498G0714820100.01.T01 | Secologanin synthase                                                      |
| maker-7-augustus-gene-261.13-mRNA-1 | Japonica | NA       |           | Os07g0635500 | OsR498G0714821100.01.T01 | Secologanin synthase                                                      |
| maker-7-augustus-gene-261.15-mRNA-1 | Japonica | NA       |           |              | OsR498G0917123900.01.T01 |                                                                           |
| maker-7-augustus-gene-261.18-mRNA-1 | Japonica | NA       |           | Os07g0635700 | OsR498G0714821700.01.T01 | Secologanin synthase                                                      |
| maker-7-augustus-gene-261.2-mRNA-1  | Japonica | NA       |           | Os07g0634600 | OsR498G0714817700.01.T01 | Pectin acetylesterase                                                     |
| maker-7-augustus-gene-261.21-mRNA-1 | Japonica | Indica   |           | Os07g0634100 | OsR498G0714815200.01.T01 | TSL-kinase interacting protein 1                                          |
| maker-7-augustus-gene-261.24-mRNA-1 | Japonica | NA       |           | Os07g0634300 | OsR498G0714816400.01.T01 | Low temperature viability protein, expressed                              |
| maker-7-augustus-gene-261.26-mRNA-1 | Japonica | NA       |           | Os07g0634400 | OsR498G0714816600.01.T01 | Phosphate metabolism protein 8-like                                       |
| maker-7-augustus-gene-261.8-mRNA-1  | Japonica | NA       |           |              | OsR498G0714819100.01.T01 | Transcription factor MYB86                                                |
| maker-7-augustus-gene-262.0-mRNA-1  | Japonica | NA       |           | Os07g0636200 | OsR498G0714823900.01.T01 | Putative calcium/calmodulin-dependent protein kinase chromatin remodeling |
| maker-7-augustus-gene-262.14-mRNA-1 | Japonica | NA       | Kinase-TM |              | OsR498G0714826500.01.T04 | Non-specific serine/threonine protein kinase                              |
| maker-7-augustus-gene-262.20-mRNA-1 | Japonica | NA       |           |              | OsR498G0714826900.01.T01 | J domain-containing protein                                               |
| maker-7-augustus-gene-262.24-mRNA-1 | Japonica | NA       |           | Os07g0637400 | OsR498G0714828500.01.T01 | Novel plant snare                                                         |
| maker-7-augustus-gene-262.30-mRNA-1 | Japonica | NA       |           | Os07g0637200 | OsR498G0714827200.01.T01 | Putative endonuclease or glycosyl hydrolase                               |
| maker-7-augustus-gene-262.32-mRNA-1 | Japonica | NA       |           | Os07g0637300 | OsR498G0714827600.01.T01 | Protein-serine/threonine kinase                                           |
| maker-7-augustus-gene-262.39-mRNA-1 | Japonica | NA       |           | Os07g0637500 | OsR498G0714828800.01.T02 | Serine/threonine-protein kinase Haspin                                    |
| maker-7-augustus-gene-263.44-mRNA-1 | Japonica | NA       |           | Os07g0638400 | OsR498G0714831300.01.T01 | Peroxioredoxin                                                            |
| maker-7-augustus-gene-263.46-mRNA-1 | Japonica | NA       |           | Os07g0638500 | OsR498G0714831500.01.T01 | Dirigent protein (Fragment)                                               |
| maker-7-augustus-gene-263.47-mRNA-1 | Japonica | NA       |           |              | OsR498G0714830200.01.T01 | Kinesin-like protein KIN-12E                                              |
| maker-7-augustus-gene-263.56-mRNA-1 | Japonica | NA       |           |              | OsR498G0714834000.01.T01 | 4-coumarate--CoA ligase-like 8                                            |
| maker-7-augustus-gene-264.0-mRNA-1  | Japonica | NA       |           | Os07g0639800 | OsR498G0714835900.01.T01 | Eukaryotic translation initiation factor 6                                |
| maker-7-augustus-gene-264.10-mRNA-1 | Japonica | NA       |           | Os07g0640200 | OsR498G0714836700.01.T01 | Xylulose kinase                                                           |
| maker-7-augustus-gene-264.15-mRNA-1 | Japonica | NA       |           | Os07g0640900 | OsR498G0714838300.01.T02 | Heat stress transcription factor B-4                                      |
| maker-7-augustus-gene-264.20-mRNA-1 | Japonica | NA       |           | Os07g0639500 |                          | Peroxidase                                                                |
| maker-7-augustus-gene-264.21-mRNA-1 | Japonica | NA       |           | Os07g0639600 | OsR498G0714835000.01.T04 | Pyroglutamate carboxylate peptidase                                       |
| maker-7-augustus-gene-264.26-mRNA-1 | Japonica | NA       |           |              | OsR498G0714836200.01.T02 | dTMP kinase                                                               |
| maker-7-augustus-gene-264.30-mRNA-1 | Japonica | NA       |           | Os08g0522100 | OsR498G0816484000.01.T04 | DUF223 domain-containing protein                                          |
| maker-7-augustus-gene-264.31-mRNA-1 | Japonica | NA       |           | Os08g0522100 | OsR498G0714837000.01.T04 | ATP-dependent DNA helicase                                                |
| maker-7-augustus-gene-264.4-mRNA-1  | Japonica | Indica   |           | Os07g0640000 | OsR498G0714836300.01.T01 | Probable protein arginine N-methyltransferase 3                           |
| maker-7-augustus-gene-264.54-mRNA-1 | Japonica | NA       |           |              |                          | O-fucosyltransferase family protein                                       |
| maker-7-augustus-gene-264.57-mRNA-1 | Japonica | Indica   | Kinase-TM | Os03g0366200 | OsR498G0714839200.01.T01 | Calcium/calmodulin-dependent serine/threonine-protein kinase 1            |
| maker-7-augustus-gene-264.63-mRNA-1 | Japonica | NA       |           | Os07g0641600 | OsR498G0714840200.01.T01 | Protein N-lysine methyltransferase METTL21A                               |
| maker-7-augustus-gene-264.67-mRNA-1 | Japonica | Indica   |           | Os07g0641800 | OsR498G0714840600.01.T01 | Chaperonin 10 isoform 1                                                   |
| maker-7-augustus-gene-264.8-mRNA-1  | Japonica | NA       |           | Os07g0640100 | OsR498G0714836500.01.T01 | LYR family of Fe/S cluster biogenesis protein                             |
| maker-7-augustus-gene-265.41-mRNA-1 | Japonica | NA       |           | Os07g0642300 | OsR498G0714842300.01.T03 | Trafficking protein particle complex subunit                              |
| maker-7-augustus-gene-265.46-mRNA-1 | Japonica | Japonica |           | Os07g0642400 | OsR498G0714842500.01.T01 | SWI/SNF-related matrix-associated actin-dependent regulator of chromatin  |
| maker-7-augustus-gene-265.48-mRNA-1 | Japonica | NA       |           | Os07g0642800 | OsR498G0714844300.01.T01 | Stomatal closure-related actin-binding protein 1                          |
| maker-7-augustus-gene-265.53-mRNA-1 | Japonica | Indica   |           | Os09g0557300 | OsR498G0714841600.01.T01 |                                                                           |
| maker-7-augustus-gene-265.55-mRNA-1 | Japonica | NA       |           | Os07g0642200 | OsR498G0714842200.01.T01 | GDSL esterase/lipase                                                      |
| maker-7-augustus-gene-265.57-mRNA-1 | Japonica | NA       |           | Os07g0642600 | OsR498G0714844000.01.T01 | TFIIIS N-terminal domain-containing protein                               |
| maker-7-augustus-gene-265.62-mRNA-1 | Japonica | NA       |           | Os07g0642900 | OsR498G0714844600.01.T01 | Gamma carbonic anhydrase 2 mitochondrial                                  |
| maker-7-augustus-gene-265.67-mRNA-1 | Japonica | NA       |           | Os07g0644000 | OsR498G0714848000.01.T02 | ATP synthase mitochondrial F1 complex assembly factor 2 like              |
| maker-7-augustus-gene-266.0-mRNA-1  | Japonica | NA       |           | Os07g0644100 | OsR498G0714848100.01.T01 | BZIP transcription factor a                                               |
| maker-7-augustus-gene-266.10-mRNA-1 | Japonica | NA       |           | Os07g0644300 | OsR498G0714848600.01.T01 | Pre-mRNA-splicing factor like                                             |
| maker-7-augustus-gene-266.2-mRNA-1  | Japonica | NA       |           | Os07g0644200 | OsR498G0714848300.01.T04 | Sulfotransferase                                                          |
| maker-7-augustus-gene-266.4-mRNA-1  | Japonica | NA       |           | Os07g0644600 | OsR498G0714848700.01.T01 | 11-oxo-beta-amylin 30-oxidase                                             |
| maker-7-augustus-gene-267.25-mRNA-1 | Japonica | NA       |           | Os07g0645400 | OsR498G0714853900.01.T01 | NADH dehydrogenase [ubiquinone] flavoprotein 1, mitochondrial             |
| maker-7-augustus-gene-267.27-mRNA-1 | Japonica | NA       |           |              |                          | Universal stress protein family protein                                   |
| maker-7-augustus-gene-267.31-mRNA-1 | Japonica | NA       |           |              | OsR498G0714855500.01.T02 | PCI domain-containing protein                                             |
| maker-7-augustus-gene-267.46-mRNA-1 | Japonica | NA       |           |              |                          | Non-specific serine/threonine protein kinase                              |

|                                     |          |          |  |              |                          |                                                                        |
|-------------------------------------|----------|----------|--|--------------|--------------------------|------------------------------------------------------------------------|
| maker-7-augustus-gene-267.54-mRNA-1 | Japonica | NA       |  | Os07g0645500 | OsR498G0714854200.01.T01 | Endo/exonuclease/phosphatase domain-containing protein (Fragment)      |
| maker-7-augustus-gene-268.11-mRNA-1 | Japonica | NA       |  | Os07g0647900 | OsR498G0714864900.01.T01 | DEAD-box ATP-dependent RNA helicase                                    |
| maker-7-augustus-gene-268.16-mRNA-1 | Japonica | Indica   |  | Os07g0646100 | OsR498G0714855800.01.T02 | Protein-serine/threonine phosphatase                                   |
| maker-7-augustus-gene-268.3-mRNA-1  | Japonica | NA       |  | Os07g0647100 | OsR498G0714862300.01.T01 | HEAT repeat family protein, expressed                                  |
| maker-7-augustus-gene-268.38-mRNA-1 | Japonica | NA       |  | Os07g0647200 | OsR498G0714862600.01.T01 |                                                                        |
| maker-7-augustus-gene-268.40-mRNA-1 | Japonica | NA       |  |              | OsR498G0714863800.01.T02 | Tim44 domain-containing protein (Fragment)                             |
| maker-7-augustus-gene-268.47-mRNA-1 | Japonica | NA       |  |              | OsR498G0714864200.01.T01 | RING-type E3 ubiquitin transferase                                     |
| maker-7-augustus-gene-268.49-mRNA-1 | Japonica | Indica   |  | Os07g0647800 | OsR498G0714864800.01.T03 | RING-type E3 ubiquitin transferase                                     |
| maker-7-augustus-gene-268.54-mRNA-1 | Japonica | NA       |  | Os07g0648000 | OsR498G0714865200.01.T01 |                                                                        |
| maker-7-augustus-gene-268.8-mRNA-1  | Japonica | NA       |  |              | OsR498G0714863900.01.T02 | Acytochrome-C oxidase/electron carrier protein                         |
| maker-7-augustus-gene-269.36-mRNA-1 | Japonica | NA       |  |              | OsR498G0714865900.01.T05 | Mediator of RNA polymerase II transcription subunit 12                 |
| maker-7-augustus-gene-269.44-mRNA-1 | Japonica | Japonica |  | Os07g0649500 | OsR498G0714872500.01.T01 |                                                                        |
| maker-7-augustus-gene-270.1-mRNA-1  | Japonica | NA       |  |              | OsR498G0714874300.01.T01 | Saposin B-type domain-containing protein                               |
| maker-7-augustus-gene-270.4-mRNA-1  | Japonica | NA       |  | Os07g0543500 | OsR498G0714874500.01.T01 | Myb-like domain-containing protein                                     |
| maker-7-augustus-gene-270.6-mRNA-1  | Japonica | Japonica |  | Os07g0650600 | OsR498G0714876300.01.T02 |                                                                        |
| maker-7-augustus-gene-271.35-mRNA-1 | Japonica | NA       |  | Os07g0651600 |                          | Retrovirus-related Pol polyprotein from transposon TNT 1-94            |
| maker-7-augustus-gene-272.31-mRNA-1 | Japonica | Japonica |  | Os07g0653150 | OsR498G0714875500.01.T01 | Saposin B-type domain-containing protein                               |
| maker-7-augustus-gene-272.33-mRNA-1 | Japonica | NA       |  | Os07g0652800 |                          | PIF-like transposase                                                   |
| maker-7-augustus-gene-273.22-mRNA-1 | Japonica | Indica   |  | Os07g0543500 | OsR498G0714874300.01.T01 |                                                                        |
| maker-7-augustus-gene-273.24-mRNA-1 | Japonica | Indica   |  | Os07g0543500 | OsR498G0714874500.01.T01 | Saposin B-type domain-containing protein                               |
| maker-7-augustus-gene-273.25-mRNA-1 | Japonica | Japonica |  | Os07g0654450 | OsR498G0714876300.01.T02 |                                                                        |
| maker-7-augustus-gene-273.32-mRNA-1 | Japonica | NA       |  | Os07g0655300 | OsR498G0714877700.01.T01 | BTB/POZ and MATH domain-containing protein 2                           |
| maker-7-augustus-gene-273.34-mRNA-1 | Japonica | NA       |  | Os07g0655400 | OsR498G0714878300.01.T01 | Rhomboid-like protein 19                                               |
| maker-7-augustus-gene-274.0-mRNA-1  | Japonica | NA       |  | Os07g0655500 | OsR498G0714878700.01.T02 | CID domain-containing protein                                          |
| maker-7-augustus-gene-274.10-mRNA-1 | Japonica | NA       |  |              | OsR498G0714880100.01.T01 | Trichome birefringence-like family                                     |
| maker-7-augustus-gene-274.12-mRNA-1 | Japonica | Indica   |  | Os07g0656200 | OsR498G0714880900.01.T05 | Beta-glucosidase 26                                                    |
| maker-7-augustus-gene-274.19-mRNA-1 | Japonica | NA       |  |              | OsR498G0714881700.01.T01 |                                                                        |
| maker-7-augustus-gene-274.2-mRNA-1  | Japonica | NA       |  | Os07g0655600 | OsR498G0714879300.01.T01 | Pectinesterase                                                         |
| maker-7-augustus-gene-274.21-mRNA-1 | Japonica | NA       |  | Os07g0656600 | OsR498G0714881900.01.T01 | Structural constituent of ribosome protein                             |
| maker-7-augustus-gene-274.23-mRNA-1 | Japonica | Indica   |  | Os07g0656700 | OsR498G0714882100.01.T01 | R3H domain-containing protein 1 (Fragment)                             |
| maker-7-augustus-gene-274.27-mRNA-1 | Japonica | NA       |  |              | OsR498G0714882500.01.T01 | EEF1A lysine methyltransferase 4 isoform A                             |
| maker-7-augustus-gene-274.31-mRNA-1 | Japonica | Japonica |  | Os07g0656100 | OsR498G0714880400.01.T01 | Plasma-membrane choline transporter family protein isoform 2           |
| maker-7-augustus-gene-274.37-mRNA-1 | Japonica | NA       |  | Os07g0656500 | OsR498G0305849500.01.T02 | Mg-chelatase H subunit (Fragment)                                      |
| maker-7-augustus-gene-274.40-mRNA-1 | Japonica | NA       |  | Os07g0656900 | OsR498G0714882800.01.T01 | Serine carboxypeptidase II-3                                           |
| maker-7-augustus-gene-274.43-mRNA-1 | Japonica | NA       |  | Os07g0657100 | OsR498G0714884200.01.T02 | VOC domain-containing protein (Fragment)                               |
| maker-7-augustus-gene-274.5-mRNA-1  | Japonica | NA       |  | Os07g0655900 | OsR498G0714879900.01.T01 | TVP38/TMEM64 family membrane protein slr0305 family                    |
| maker-7-augustus-gene-275.0-mRNA-1  | Japonica | NA       |  | Os07g0657200 | OsR498G0714884300.01.T04 | Protein transport protein SEC31 homolog B                              |
| maker-7-augustus-gene-275.15-mRNA-1 | Japonica | NA       |  |              | OsR498G0714886900.01.T01 | Phospholipase A(2)                                                     |
| maker-7-augustus-gene-275.23-mRNA-1 | Japonica | Japonica |  | Os07g0657600 | OsR498G0714886200.01.T01 | ENDO3c domain-containing protein                                       |
| maker-7-augustus-gene-275.32-mRNA-1 | Japonica | Indica   |  | Os07g0658200 | OsR498G0714887400.01.T05 | 28S ribosomal protein S9 mitochondrial                                 |
| maker-7-augustus-gene-275.36-mRNA-1 | Japonica | NA       |  |              | OsR498G0714888000.01.T01 | Glutamine amidotransferase type-2 domain-containing protein (Fragment) |
| maker-7-augustus-gene-275.44-mRNA-1 | Japonica | NA       |  | Os07g0658550 |                          | GTP cyclohydrolase II                                                  |
| maker-7-augustus-gene-275.6-mRNA-1  | Japonica | NA       |  | Os07g0657500 | OsR498G0714885900.01.T01 | TRAF-type zinc finger domain-containing protein 1                      |
| maker-7-augustus-gene-275.9-mRNA-1  | Japonica | NA       |  | Os07g0657900 | OsR498G0714886500.01.T01 | Thioredoxin reductase NTRC                                             |
| maker-7-augustus-gene-276.0-mRNA-1  | Japonica | NA       |  |              |                          | F-box protein SKIP5                                                    |
| maker-7-augustus-gene-276.13-mRNA-1 | Japonica | NA       |  |              | OsR498G0714890600.01.T03 | GA-binding protein subunit beta-2 like                                 |
| maker-7-augustus-gene-276.19-mRNA-1 | Japonica | Japonica |  | Os07g0659400 | OsR498G0714891200.01.T01 | Haloacid dehalogenase-like hydrolase domain-containing protein 3       |
| maker-7-augustus-gene-276.22-mRNA-1 | Japonica | NA       |  | Os07g0659500 | OsR498G0714892200.01.T01 | Condensin complex subunit 1                                            |
| maker-7-augustus-gene-276.24-mRNA-1 | Japonica | NA       |  |              | OsR498G0714892400.01.T01 | Annexin                                                                |
| maker-7-augustus-gene-276.36-mRNA-1 | Japonica | NA       |  |              | OsR498G0714894200.01.T02 | RNA pseudourine synthase 6, chloroplastic                              |
| maker-7-augustus-gene-276.5-mRNA-1  | Japonica | Indica   |  | Os03g0669000 | OsR498G0714893500.01.T02 | DEAD-box ATP-dependent RNA helicase 10                                 |
| maker-7-augustus-gene-276.9-mRNA-1  | Japonica | NA       |  | Os07g0660700 | OsR498G0714894900.01.T01 | WD repeat-containing protein 55                                        |
| maker-7-augustus-gene-277.36-mRNA-1 | Japonica | NA       |  | Os07g0661000 | OsR498G0714895100.01.T01 | Adenosine deaminase                                                    |
| maker-7-augustus-gene-277.41-mRNA-1 | Japonica | Indica   |  | Os07g0661300 | OsR498G0714896900.01.T01 | Ubiquitin carboxyl-terminal hydrolase                                  |
| maker-7-augustus-gene-277.54-mRNA-1 | Japonica | NA       |  | Os07g0661100 | OsR498G0714895400.01.T01 | GlcNAc-1-P transferase                                                 |
| maker-7-augustus-gene-277.64-mRNA-1 | Japonica | NA       |  | Os07g0661600 | OsR498G0714899400.01.T04 | ABA insensitive ring protein                                           |
| maker-7-augustus-gene-278.11-mRNA-1 | Japonica | NA       |  | Os07g0664200 | OsR498G0714908300.01.T01 | Putative sex determination protein tasselseed 2                        |
| maker-7-augustus-gene-279.35-mRNA-1 | Japonica | NA       |  | Os07g0665900 | OsR498G0714913300.01.T03 |                                                                        |
| maker-7-augustus-gene-279.37-mRNA-1 | Japonica | NA       |  |              | OsR498G0714915100.01.T03 |                                                                        |
| maker-7-augustus-gene-279.55-mRNA-1 | Japonica | NA       |  |              | OsR498G0714913200.01.T01 | Chlorophyllase                                                         |
| maker-7-augustus-gene-279.58-mRNA-1 | Japonica | Japonica |  | Os07g0666400 | OsR498G0714915400.01.T01 |                                                                        |

|                                     |          |          |               |              |                          |                                                                          |
|-------------------------------------|----------|----------|---------------|--------------|--------------------------|--------------------------------------------------------------------------|
| maker-7-augustus-gene-279.60-mRNA-1 | Japonica | NA       |               | Os07g0666600 | OsR498G0714916000.01.T01 | NAB domain-containing protein (Fragment)                                 |
| maker-7-augustus-gene-28.51-mRNA-1  | Japonica | NA       |               | Os07g0161000 | OsR498G0713565400.01.T01 | Outer envelope protein 61                                                |
| maker-7-augustus-gene-28.57-mRNA-1  | Japonica | NA       |               |              |                          |                                                                          |
| maker-7-augustus-gene-280.0-mRNA-1  | Japonica | NA       |               | Os07g0666900 | OsR498G0714918300.01.T01 | Sodium-hydrogen exchanger 1                                              |
| maker-7-augustus-gene-280.10-mRNA-1 | Japonica | NA       |               |              | OsR498G0714919100.01.T01 | Homeobox-leucine zipper protein ROC8                                     |
| maker-7-augustus-gene-280.12-mRNA-1 | Japonica | Indica   | Kinase-TM     | Os03g0349200 | OsR498G0714922100.01.T01 | probable serine/threonine-protein kinase At1g54610                       |
| maker-7-augustus-gene-280.23-mRNA-1 | Japonica | Japonica |               | Os07g0667100 | OsR498G0714919000.01.T01 | Beta-amylase                                                             |
| maker-7-augustus-gene-280.26-mRNA-1 | Japonica | NA       |               | Os07g0667300 | OsR498G0714919400.01.T01 | Zinc finger protein CONSTANS-LIKE 13                                     |
| maker-7-augustus-gene-280.28-mRNA-1 | Japonica | NA       |               | Os07g0667400 | OsR498G0714919600.01.T02 | Kinesin-like calmodulin-binding protein-like isoform X1                  |
| maker-7-augustus-gene-280.6-mRNA-1  | Japonica | NA       |               | Os07g0667000 | OsR498G0714918700.01.T01 | Tubby-like F-box protein 3                                               |
| maker-7-augustus-gene-281.22-mRNA-1 | Japonica | Indica   |               | Os07g0670100 | OsR498G0714929900.01.T01 |                                                                          |
| maker-7-augustus-gene-281.25-mRNA-1 | Japonica | NA       |               |              |                          | Autophagy-related protein 18                                             |
| maker-7-augustus-gene-282.0-mRNA-1  | Japonica | Japonica |               | Os07g0671100 | OsR498G0714931700.01.T02 | Uveal autoantigen with coiled-coil domains and ankyrin repeats isoform 4 |
| maker-7-augustus-gene-282.17-mRNA-1 | Japonica | NA       |               | Os10g0111000 | OsR498G0306605900.01.T01 |                                                                          |
| maker-7-augustus-gene-282.19-mRNA-1 | Japonica | NA       |               | Os07g0672500 | OsR498G0714936900.01.T05 | AAA domain-containing protein                                            |
| maker-7-augustus-gene-282.20-mRNA-1 | Japonica | NA       |               | Os07g0672500 | OsR498G0714936900.01.T01 | AAA domain-containing protein                                            |
| maker-7-augustus-gene-282.33-mRNA-1 | Japonica | Indica   |               | Os07g0673000 | OsR498G0714938300.01.T02 | T-box protein 41                                                         |
| maker-7-augustus-gene-282.37-mRNA-1 | Japonica | NA       |               |              | OsR498G0714934800.01.T02 | Indole-3-acetic acid-amido synthetase                                    |
| maker-7-augustus-gene-282.4-mRNA-1  | Japonica | Indica   |               | Os07g0671400 | OsR498G0714933500.01.T04 | HMA domain-containing protein                                            |
| maker-7-augustus-gene-282.41-mRNA-1 | Japonica | NA       |               |              | OsR498G0714937200.01.T01 | Translation initiation factor eIF-2B subunit alpha                       |
| maker-7-augustus-gene-282.43-mRNA-1 | Japonica | NA       |               | Os07g0673100 | OsR498G0714938600.01.T01 | Ribosome biogenesis protein NSA                                          |
| maker-7-augustus-gene-282.47-mRNA-1 | Japonica | NA       |               | Os07g0673200 | OsR498G0714938800.01.T02 | RING-type E3 ubiquitin transferase                                       |
| maker-7-augustus-gene-282.7-mRNA-1  | Japonica | NA       |               | Os07g0671700 | OsR498G0714934900.01.T01 | Histone-arginine methyltransferase CARM1                                 |
| maker-7-augustus-gene-283.0-mRNA-1  | Japonica | NA       |               | Os07g0673400 | OsR498G0714939500.01.T01 | Usp domain-containing protein                                            |
| maker-7-augustus-gene-283.11-mRNA-1 | Japonica | NA       |               | Os07g0674400 | OsR498G0714943300.01.T01 | Phylloplanin                                                             |
| maker-7-augustus-gene-283.13-mRNA-1 | Japonica | NA       |               | Os07g0674500 | OsR498G0714943500.01.T01 | Pollen Ole e 1 allergen/extensin                                         |
| maker-7-augustus-gene-283.15-mRNA-1 | Japonica | NA       |               |              | OsR498G0714943700.01.T01 |                                                                          |
| maker-7-augustus-gene-283.2-mRNA-1  | Japonica | Japonica |               | Os07g0673900 | OsR498G0714940500.01.T04 | HIG1 domain-containing protein                                           |
| maker-7-augustus-gene-283.20-mRNA-1 | Japonica | NA       |               | Os07g0673500 | OsR498G0714939400.01.T02 | Putative pre-mRNA splicing factor SF2                                    |
| maker-7-augustus-gene-283.25-mRNA-1 | Japonica | NA       |               | Os07g0674800 | OsR498G0714944400.01.T01 | Ethylene-responsive transcription factor RAP2-2                          |
| maker-7-augustus-gene-283.5-mRNA-1  | Japonica | NA       |               | Os07g0674100 | OsR498G0714941700.01.T01 | UDP-glucuronic acid decarboxylase                                        |
| maker-7-augustus-gene-283.9-mRNA-1  | Japonica | NA       |               | Os07g0674200 | OsR498G0714941900.01.T01 | 60S ribosomal protein L22-2, putative, expressed                         |
| maker-7-augustus-gene-284.24-mRNA-1 | Japonica | NA       |               |              |                          | Putative acyl-CoA dehydrogenase                                          |
| maker-7-augustus-gene-284.30-mRNA-1 | Japonica | NA       | Kinase-TM     |              | OsR498G0714949300.01.T02 | PEK protein kinase                                                       |
| maker-7-augustus-gene-284.33-mRNA-1 | Japonica | Indica   |               | Os07g0676600 | OsR498G0714949700.01.T05 | BHLH transcription factor                                                |
| maker-7-augustus-gene-284.38-mRNA-1 | Japonica | NA       |               | Os07g0675100 | OsR498G0714945200.01.T01 | Pectinesterase                                                           |
| maker-7-augustus-gene-284.40-mRNA-1 | Japonica | NA       |               |              | OsR498G0714947400.01.T02 | Tyrosyl-tRNA synthetase                                                  |
| maker-7-augustus-gene-285.0-mRNA-1  | Japonica | NA       |               | Os07g0677100 | OsR498G0714950500.01.T04 | Peroxidase                                                               |
| maker-7-augustus-gene-285.1-mRNA-1  | Japonica | NA       |               | Os07g0677200 | OsR498G0714950500.01.T06 | Peroxidase                                                               |
| maker-7-augustus-gene-285.4-mRNA-1  | Japonica | NA       |               | Os07g0677900 | OsR498G0714952500.01.T01 | Myosin heavy chain-like                                                  |
| maker-7-augustus-gene-285.6-mRNA-1  | Japonica | NA       |               | Os07g0677600 | OsR498G0714951400.01.T01 | Peroxidase                                                               |
| maker-7-augustus-gene-286.29-mRNA-1 | Japonica | NA       |               | Os07g0679300 | OsR498G0714959300.01.T05 | Alpha-galactosidase                                                      |
| maker-7-augustus-gene-286.32-mRNA-1 | Japonica | NA       |               |              |                          | PAP/OAS1 substrate-binding domain superfamily                            |
| maker-7-augustus-gene-286.35-mRNA-1 | Japonica | Indica   |               | Os07g0679500 | OsR498G0714960400.01.T01 | BZIP-type transcription factor (Fragment)                                |
| maker-7-augustus-gene-286.38-mRNA-1 | Japonica | NA       |               | Os07g0679700 | OsR498G0714960800.01.T01 | B3 domain-containing transcription repressor like                        |
| maker-7-augustus-gene-286.42-mRNA-1 | Japonica | NA       |               | Os07g0680000 | OsR498G0714961800.01.T02 | Vacuolar-sorting receptor 1                                              |
| maker-7-augustus-gene-286.48-mRNA-1 | Japonica | Indica   |               | Os07g0680300 | OsR498G0714962600.01.T01 | Ubiquinol-cytochrome c reductase complex 6.7 kDa protein-like            |
| maker-7-augustus-gene-286.51-mRNA-1 | Japonica | NA       |               | Os07g0680400 |                          | WRKY transcription factor 47                                             |
| maker-7-augustus-gene-286.53-mRNA-1 | Japonica | NA       |               | Os07g0680500 |                          | E3 ubiquitin-protein ligase SHPRH                                        |
| maker-7-augustus-gene-286.55-mRNA-1 | Japonica | NA       |               |              | OsR498G0714963200.01.T04 | Zinc ion binding                                                         |
| maker-7-augustus-gene-286.59-mRNA-1 | Japonica | NA       |               | Os07g0680600 | OsR498G0714963400.01.T02 | Protein ENHANCED DISEASE RESISTANCE 4                                    |
| maker-7-augustus-gene-287.22-mRNA-1 | Japonica | Indica   | Kinase        | Os07g0680900 | OsR498G0714963900.01.T06 | Non-specific serine/threonine protein kinase                             |
| maker-7-augustus-gene-287.25-mRNA-1 | Japonica | NA       |               | Os07g0681200 | OsR498G0714965700.01.T01 | Acid phosphatase                                                         |
| maker-7-augustus-gene-287.27-mRNA-1 | Japonica | NA       |               | Os07g0681300 | OsR498G0714966100.01.T01 | Secologanin synthase                                                     |
| maker-7-augustus-gene-287.29-mRNA-1 | Japonica | NA       |               | Os07g0681500 | OsR498G0714967500.01.T01 | Mediator of RNA polymerase II transcription subunit 33A                  |
| maker-7-augustus-gene-287.36-mRNA-1 | Japonica | NA       |               | Os07g0681600 | OsR498G0714966700.01.T03 | ATP-dependent DNA helicase                                               |
| maker-7-augustus-gene-287.40-mRNA-1 | Japonica | NA       |               | Os07g0681700 | OsR498G0714966900.01.T03 | Hexosyltransferase                                                       |
| maker-7-augustus-gene-287.43-mRNA-1 | Japonica | NA       |               | Os07g0682000 | OsR498G0714967300.01.T03 | Putative galacturonosyltransferase 7                                     |
| maker-7-augustus-gene-287.45-mRNA-1 | Japonica | NA       |               | Os07g0681000 | OsR498G0714964200.01.T02 | Eukaryotic translation initiation factor 2 subunit beta                  |
| maker-7-augustus-gene-287.50-mRNA-1 | Japonica | NA       | Kinase-LRR-TM | Os07g0681100 | OsR498G0714964600.01.T02 | Putative inactive receptor kinase isoform A                              |
| maker-7-augustus-gene-287.53-mRNA-1 | Japonica | NA       |               | Os07g0682400 | OsR498G0714968400.01.T01 | Zinc finger CCCH domain-containing protein 53                            |



|                                     |          |          |           |              |                          |                                                                    |
|-------------------------------------|----------|----------|-----------|--------------|--------------------------|--------------------------------------------------------------------|
| maker-7-augustus-gene-288.0-mRNA-1  | Japonica | NA       |           | Os07g0682800 | OsR498G0714973300.01.T01 | Apyrase                                                            |
| maker-7-augustus-gene-288.10-mRNA-1 | Japonica | NA       |           | Os07g0684000 | OsR498G0714976700.01.T01 | Stress responsive protein 1                                        |
| maker-7-augustus-gene-288.26-mRNA-1 | Japonica | NA       |           | Os07g0682700 | OsR498G0714973000.01.T02 |                                                                    |
| maker-7-augustus-gene-288.32-mRNA-1 | Japonica | NA       |           | Os07g0684100 | OsR498G0714977000.01.T01 | Thioredoxin-like 1-1 chloroplastic                                 |
| maker-7-augustus-gene-288.36-mRNA-1 | Japonica | NA       |           |              |                          |                                                                    |
| maker-7-augustus-gene-288.39-mRNA-1 | Japonica | NA       |           | Os07g0684800 | OsR498G0714978600.01.T02 | NAC transcription factor                                           |
| maker-7-augustus-gene-288.5-mRNA-1  | Japonica | NA       |           |              | OsR498G0714974500.01.T01 | NAC domain transcription factor                                    |
| maker-7-augustus-gene-288.8-mRNA-1  | Japonica | NA       |           |              | OsR498G0714974900.01.T01 | Stress responsive protein                                          |
| maker-7-augustus-gene-288.9-mRNA-1  | Japonica | NA       |           | Os07g0683900 | OsR498G0714976300.01.T03 | Hydroxyproline-rich glycoprotein family protein                    |
| maker-7-augustus-gene-289.0-mRNA-1  | Japonica | NA       |           | Os07g0684900 | OsR498G0714981500.01.T01 | Homeobox domain-containing protein (Fragment)                      |
| maker-7-augustus-gene-289.12-mRNA-1 | Japonica | NA       |           | Os07g0685000 | OsR498G0714981800.01.T01 | Dof-type domain-containing protein                                 |
| maker-7-augustus-gene-289.13-mRNA-1 | Japonica | NA       |           | Os07g0685300 | OsR498G0714982400.01.T01 | HTH myb-type domain-containing protein                             |
| maker-7-augustus-gene-289.16-mRNA-1 | Japonica | NA       |           |              | OsR498G0714982600.01.T01 | Nuclear pore complex protein NUP214                                |
| maker-7-augustus-gene-289.3-mRNA-1  | Japonica | NA       |           | Os07g0685500 | OsR498G0714983100.01.T01 | probable lysophospholipase BODYGUARD 4                             |
| maker-7-augustus-gene-289.5-mRNA-1  | Japonica | Japonica |           | Os07g0685800 | OsR498G0714984700.01.T01 | Short-chain dehydrogenase/reductase 2                              |
| maker-7-augustus-gene-289.9-mRNA-1  | Japonica | NA       |           | Os07g0686100 | OsR498G0714987100.01.T02 | ABSCISIC ACID-INSENSITIVE 5-like protein 2 isoform D               |
| maker-7-augustus-gene-29.0-mRNA-1   | Japonica | NA       |           |              | OsR498G0713565900.01.T01 | FBD domain-containing protein                                      |
| maker-7-augustus-gene-29.13-mRNA-1  | Japonica | NA       |           | Os07g0162100 | OsR498G0713568400.01.T01 | 3-oxo-5-alpha-steroid 4-dehydrogenase family protein, putative     |
| maker-7-augustus-gene-29.15-mRNA-1  | Japonica | NA       |           |              | OsR498G0713568600.01.T01 | GTD-binding domain-containing protein (Fragment)                   |
| maker-7-augustus-gene-29.17-mRNA-1  | Japonica | NA       |           |              | OsR498G0713572400.01.T04 | FAD-linked oxidases family protein isoform 1                       |
| maker-7-augustus-gene-29.2-mRNA-1   | Japonica | NA       |           | Os07g0162300 | OsR498G0713568900.01.T01 | Non-specific serine/threonine protein kinase                       |
| maker-7-augustus-gene-29.21-mRNA-1  | Japonica | NA       |           |              | OsR498G0713572600.01.T01 | FBD domain-containing protein                                      |
| maker-7-augustus-gene-29.9-mRNA-1   | Japonica | NA       |           | Os07g0161600 | OsR498G0713566200.01.T08 | Calcium-dependent protein kinase                                   |
| maker-7-augustus-gene-290.46-mRNA-1 | Japonica | NA       |           | Os07g0686500 | OsR498G0714989100.01.T01 | BZIP transcription factor bZIP114                                  |
| maker-7-augustus-gene-290.48-mRNA-1 | Japonica | Indica   |           | Os07g0686700 | OsR498G0714990900.01.T01 | RAD50-interacting protein 1                                        |
| maker-7-augustus-gene-290.51-mRNA-1 | Japonica | Indica   | Kinase    | Os07g0686800 | OsR498G0714991100.01.T01 | Putative serine/threonine-protein kinase PBL18                     |
| maker-7-augustus-gene-290.54-mRNA-1 | Japonica | NA       |           |              | OsR498G0714991300.01.T01 | Non-reducing end alpha-L-arabinofuranosidase                       |
| maker-7-augustus-gene-290.60-mRNA-1 | Japonica | Indica   | Kinase-TM | Os03g0319400 | OsR498G0714991900.01.T01 | Non-specific serine/threonine protein kinase                       |
| maker-7-augustus-gene-290.65-mRNA-1 | Japonica | NA       |           | Os07g0687500 | OsR498G0714992900.01.T01 | Rhodanese-like/PpiC domain-containing protein 12, chloroplastic    |
| maker-7-augustus-gene-290.71-mRNA-1 | Japonica | NA       |           | Os07g0687700 | OsR498G0714993500.01.T06 | TGA-type basic leucine zipper protein                              |
| maker-7-augustus-gene-290.74-mRNA-1 | Japonica | NA       |           | Os07g0688200 | OsR498G0714995900.01.T01 | Cold-and ABA-responsive R2R3 MYB transcription factor 5            |
| maker-7-augustus-gene-290.76-mRNA-1 | Japonica | NA       |           | Os07g0686400 | OsR498G0714988600.01.T01 | Centromere protein-like                                            |
| maker-7-augustus-gene-290.79-mRNA-1 | Japonica | NA       |           | Os07g0687100 | OsR498G0714992200.01.T01 | Phospholipase/carboxyhydrolase                                     |
| maker-7-augustus-gene-290.84-mRNA-1 | Japonica | NA       |           | Os07g0687200 | OsR498G0714992400.01.T01 | Calmodulin                                                         |
| maker-7-augustus-gene-290.86-mRNA-1 | Japonica | NA       |           | Os07g0687300 | OsR498G0714992600.01.T01 | AMPKBI domain-containing protein (Fragment)                        |
| maker-7-augustus-gene-290.88-mRNA-1 | Japonica | NA       |           | Os07g0687900 | OsR498G0714994000.01.T01 | Hexosyltransferase                                                 |
| maker-7-augustus-gene-290.90-mRNA-1 | Japonica | Indica   |           | Os07g0688300 | OsR498G0714996200.01.T07 | Importin subunit alpha                                             |
| maker-7-augustus-gene-291.1-mRNA-1  | Japonica | Indica   |           | Os07g0688500 | OsR498G0714996300.01.T01 | Polynucleotide adenyllyltransferase                                |
| maker-7-augustus-gene-291.11-mRNA-1 | Japonica | NA       |           | Os07g0689800 | OsR498G0715003300.01.T02 | J domain-containing protein                                        |
| maker-7-augustus-gene-291.13-mRNA-1 | Japonica | NA       |           |              |                          | Aldedh domain-containing protein (Fragment)                        |
| maker-7-augustus-gene-291.22-mRNA-1 | Japonica | Japonica |           | Os07g0689150 | OsR498G0714997800.01.T04 | Aldedh domain-containing protein                                   |
| maker-7-augustus-gene-291.31-mRNA-1 | Japonica | Indica   |           | Os07g0689300 | OsR498G0714999400.01.T01 | Lon protease homolog, mitochondrial                                |
| maker-7-augustus-gene-291.36-mRNA-1 | Japonica | NA       |           | Os07g0689900 | OsR498G0715003800.01.T02 | BRCT domain-containing protein (Fragment)                          |
| maker-7-augustus-gene-291.4-mRNA-1  | Japonica | NA       |           | Os07g0689400 | OsR498G0714999700.01.T03 | probable glutamyl endopeptidase, chloroplastic                     |
| maker-7-augustus-gene-292.30-mRNA-1 | Japonica | NA       |           | Os07g0690400 | OsR498G0715004500.01.T01 | PPM-type phosphatase domain-containing protein                     |
| maker-7-augustus-gene-292.34-mRNA-1 | Japonica | NA       |           |              | OsR498G0715004900.01.T01 | BRCT domain-containing protein                                     |
| maker-7-augustus-gene-292.42-mRNA-1 | Japonica | Indica   |           | Os07g0691700 | OsR498G0715009300.01.T02 |                                                                    |
| maker-7-augustus-gene-292.47-mRNA-1 | Japonica | Indica   |           | Os07g0690300 | OsR498G0715004000.01.T02 | RING/U-box protein, putative isoform 2                             |
| maker-7-augustus-gene-292.49-mRNA-1 | Japonica | NA       |           | Os07g0691800 | OsR498G0715009600.01.T01 | 26S proteasome regulatory subunit 4 A                              |
| maker-7-augustus-gene-293.10-mRNA-1 | Japonica | NA       |           |              | OsR498G0715013100.01.T02 | Importin-11 isoform A                                              |
| maker-7-augustus-gene-293.15-mRNA-1 | Japonica | NA       |           | Os07g0693500 | OsR498G0715013300.01.T01 | AMP deaminase                                                      |
| maker-7-augustus-gene-293.2-mRNA-1  | Japonica | NA       |           |              | OsR498G0715011500.01.T02 | SNF2 domain-containing protein CLASSY 1                            |
| maker-7-augustus-gene-293.20-mRNA-1 | Japonica | NA       |           |              |                          | V-SNARE coiled-coil homology domain-containing protein             |
| maker-7-augustus-gene-293.26-mRNA-1 | Japonica | NA       |           | Os07g0693800 | OsR498G0715015100.01.T01 | Temperature-sensitive omega-3 fatty acid desaturase, chloroplastic |
| maker-7-augustus-gene-293.28-mRNA-1 | Japonica | NA       |           | Os07g0693900 | OsR498G0715015300.01.T03 | HEAT repeat-containing protein                                     |
| maker-7-augustus-gene-293.35-mRNA-1 | Japonica | NA       |           | Os07g0692200 | OsR498G0715011000.01.T01 | AAA domain-containing protein                                      |
| maker-7-augustus-gene-293.37-mRNA-1 | Japonica | NA       |           | Os07g0692800 | OsR498G0715011800.01.T01 | Eukaryotic translation initiation factor 2 subunit alpha like      |
| maker-7-augustus-gene-293.39-mRNA-1 | Japonica | Japonica |           | Os07g0693600 | OsR498G0715013600.01.T01 | Protein trichome birefringence-like 28                             |
| maker-7-augustus-gene-293.42-mRNA-1 | Japonica | NA       |           |              | OsR498G0715014400.01.T01 | PHD domain-containing protein/Agnet domain-containing protein      |
| maker-7-augustus-gene-293.44-mRNA-1 | Japonica | NA       |           | Os07g0694000 | OsR498G0715015800.01.T02 | Phosphoinositide phospholipase C                                   |
| maker-7-augustus-gene-293.6-mRNA-1  | Japonica | NA       | Kinase-TM | Os07g0693000 | OsR498G0715012100.01.T01 | Putative inactive receptor-like protein kinase                     |

|                                     |          |          |               |              |                          |                                                                       |
|-------------------------------------|----------|----------|---------------|--------------|--------------------------|-----------------------------------------------------------------------|
| maker-7-augustus-gene-294.0-mRNA-1  | Japonica | NA       |               | Os07g0695100 | OsR498G0715020100.01.T04 | Pseudo-response regulator 37 splice variant c                         |
| maker-7-augustus-gene-294.14-mRNA-1 | Japonica | NA       |               | Os07g0695900 | OsR498G0715021700.01.T01 | HTH myb-type domain-containing protein                                |
| maker-7-augustus-gene-294.17-mRNA-1 | Japonica | NA       |               |              | OsR498G0715016200.01.T01 |                                                                       |
| maker-7-augustus-gene-294.18-mRNA-1 | Japonica | NA       |               |              |                          | Glycerophosphodiester phosphodiesterase                               |
| maker-7-augustus-gene-294.23-mRNA-1 | Japonica | NA       |               | Os07g0694400 | OsR498G0715016800.01.T01 | Glycosyltransferases                                                  |
| maker-7-augustus-gene-294.34-mRNA-1 | Japonica | NA       |               | Os07g0694800 | OsR498G0715019000.01.T04 | DUF155 domain-containing protein (Fragment)                           |
| maker-7-augustus-gene-294.38-mRNA-1 | Japonica | NA       |               | Os07g0695400 | OsR498G0715020600.01.T01 | NAB domain-containing protein (Fragment)                              |
| maker-7-augustus-gene-294.6-mRNA-1  | Japonica | Japonica |               | Os07g0695700 | OsR498G0715021300.01.T05 | Peptide transporter family 1                                          |
| maker-7-augustus-gene-294.9-mRNA-1  | Japonica | NA       |               | Os07g0695800 | OsR498G0715021500.01.T01 | 2-oxoglutarate dehydrogenase, mitochondrial-like                      |
| maker-7-augustus-gene-30.28-mRNA-1  | Japonica | NA       |               |              | OsR498G0713572900.01.T01 | Leucyl-tRNA synthetase                                                |
| maker-7-augustus-gene-30.43-mRNA-1  | Japonica | NA       |               | Os07g0164200 | OsR498G0713575100.01.T01 | Chlororespiratory reduction 42                                        |
| maker-7-augustus-gene-30.45-mRNA-1  | Japonica | NA       |               |              | OsR498G0713575700.01.T03 | Alpha-1,3-glucosyltransferase                                         |
| maker-7-augustus-gene-30.49-mRNA-1  | Japonica | NA       |               | Os07g0164600 | OsR498G0713576300.01.T01 | Mediator of RNA polymerase II transcription subunit 31                |
| maker-7-augustus-gene-30.52-mRNA-1  | Japonica | Indica   |               | Os07g0165000 | OsR498G0713578300.01.T01 | Prolyl-tRNA synthetase                                                |
| maker-7-augustus-gene-30.58-mRNA-1  | Japonica | Japonica |               | Os07g0163900 | OsR498G0713574400.01.T01 | Selenium-binding protein-like protein                                 |
| maker-7-augustus-gene-30.60-mRNA-1  | Japonica | NA       |               |              | OsR498G0713574600.01.T01 | Small RNA methyltransferase                                           |
| maker-7-augustus-gene-30.63-mRNA-1  | Japonica | NA       |               | Os07g0164100 | OsR498G0713574800.01.T01 | Histone deacetylase                                                   |
| maker-7-augustus-gene-30.67-mRNA-1  | Japonica | NA       |               | Os07g0164300 | OsR498G0713575400.01.T01 | t-SNARE coiled-coil homology domain-containing protein (Fragment)     |
| maker-7-augustus-gene-30.74-mRNA-1  | Japonica | NA       |               | Os07g0164700 |                          | ATP-dependent DNA helicase                                            |
| maker-7-augustus-gene-30.77-mRNA-1  | Japonica | NA       |               |              | OsR498G0713577800.01.T03 | Indole-3-acetaldehyde oxidase                                         |
| maker-7-augustus-gene-31.0-mRNA-1   | Japonica | NA       |               |              |                          |                                                                       |
| maker-7-augustus-gene-31.11-mRNA-1  | Japonica | NA       |               | Os07g0165700 | OsR498G0713581400.01.T02 |                                                                       |
| maker-7-augustus-gene-31.13-mRNA-1  | Japonica | NA       |               | Os07g0166100 | OsR498G0713582600.01.T01 | MACPF domain-containing protein isoform A                             |
| maker-7-augustus-gene-31.2-mRNA-1   | Japonica | Japonica |               | Os07g0165500 | OsR498G0203722500.01.T01 | Cytokinin inducible protein-like                                      |
| maker-7-augustus-gene-31.21-mRNA-1  | Japonica | NA       |               |              | OsR498G0713583000.01.T01 | Helicase swr-1                                                        |
| maker-7-augustus-gene-31.5-mRNA-1   | Japonica | NA       |               |              |                          | Tetratricopeptide repeat (TPR)-containing protein                     |
| maker-7-augustus-gene-31.7-mRNA-1   | Japonica | Indica   |               | Os07g0165200 | OsR498G0713578800.01.T01 | Inhibitor of Bruton tyrosine kinase                                   |
| maker-7-augustus-gene-32.32-mRNA-1  | Japonica | NA       | Kinase-LRR-TM | Os07g0166700 | OsR498G0713584300.01.T02 | Leucine-rich repeat transmembrane protein kinase, putative, expressed |
| maker-7-augustus-gene-32.36-mRNA-1  | Japonica | NA       |               | Os07g0167000 | OsR498G0713585100.01.T01 | Eukaryotic translation initiation factor 3 subunit E                  |
| maker-7-augustus-gene-32.40-mRNA-1  | Japonica | Indica   |               | Os07g0167100 | OsR498G0713585300.01.T01 | Glutamine-dependent NAD(+) synthetase                                 |
| maker-7-augustus-gene-32.46-mRNA-1  | Japonica | NA       |               | Os07g0167300 | OsR498G0713585900.01.T02 |                                                                       |
| maker-7-augustus-gene-32.52-mRNA-1  | Japonica | NA       |               | Os07g0166800 | OsR498G0713584800.01.T01 | Ubiquitin-conjugating enzyme                                          |
| maker-7-augustus-gene-32.57-mRNA-1  | Japonica | NA       |               | Os07g0167200 | OsR498G0713585800.01.T01 | BTB/POZ and MATH domain-containing protein 4                          |
| maker-7-augustus-gene-32.60-mRNA-1  | Japonica | NA       |               | Os07g0167500 | OsR498G0713586200.01.T04 |                                                                       |
| maker-7-augustus-gene-36.44-mRNA-1  | Japonica | NA       |               | Os07g0178100 | OsR498G0713624300.01.T02 | Ethylene-overproduction protein 1                                     |
| maker-7-augustus-gene-37.32-mRNA-1  | Japonica | NA       |               | Os07g0178600 | OsR498G0713625500.01.T01 | Heat shock transcription factor                                       |
| maker-7-augustus-gene-37.34-mRNA-1  | Japonica | NA       |               | Os07g0178700 | OsR498G0713625700.01.T01 | Low molecular mass early light-inducible protein HV90, chloroplastic  |
| maker-7-augustus-gene-37.36-mRNA-1  | Japonica | NA       |               | Os07g0178800 | OsR498G0713625900.01.T01 | High molecular mass early light-inducible protein HV58, chloroplastic |
| maker-7-augustus-gene-37.38-mRNA-1  | Japonica | NA       |               |              | OsR498G0713627100.01.T02 | Peptidyl-prolyl cis-trans isomerase                                   |
| maker-7-augustus-gene-37.43-mRNA-1  | Japonica | NA       |               | Os07g0179600 |                          | Neprosin domain-containing protein                                    |
| maker-7-augustus-gene-37.46-mRNA-1  | Japonica | Indica   |               | Os01g0837500 | OsR498G0713626200.01.T02 | DNA helicase                                                          |
| maker-7-augustus-gene-37.54-mRNA-1  | Japonica | Indica   |               | Os12g0615400 | OsR498G0713627400.01.T01 | 2-methyl-6-phytyl-1,4-hydroquinone methyltransferase, chloroplastic   |
| maker-7-augustus-gene-37.56-mRNA-1  | Japonica | NA       |               | Os07g0179400 | OsR498G0713627600.01.T01 | Cytidyltransferase-like domain                                        |
| maker-7-augustus-gene-37.60-mRNA-1  | Japonica | Indica   |               | Os07g0179500 | OsR498G0713628000.01.T05 | ENT domain-containing protein (Fragment)                              |
| maker-7-augustus-gene-38.0-mRNA-1   | Japonica | Indica   |               | Os11g0135900 | OsR498G0713631300.01.T04 | MFS domain-containing protein                                         |
| maker-7-augustus-gene-38.15-mRNA-1  | Japonica | Indica   |               | Os07g0181500 | OsR498G0713633300.01.T04 | Plant-specific domain TIGR01615 family protein                        |
| maker-7-augustus-gene-38.18-mRNA-1  | Japonica | NA       |               | Os07g0181700 | OsR498G0713633700.01.T01 | guanylate-binding protein 5 isoform X1                                |
| maker-7-augustus-gene-38.23-mRNA-1  | Japonica | Japonica |               | Os07g0180800 | OsR498G0713631600.01.T02 | RNA-binding protein 47-like                                           |
| maker-7-augustus-gene-38.30-mRNA-1  | Japonica | NA       |               |              | OsR498G0713634000.01.T01 | Sporulation-specific 71                                               |
| maker-7-augustus-gene-38.32-mRNA-1  | Japonica | NA       |               | Os07g0182000 |                          | Basic leucine zipper 25                                               |
| maker-7-augustus-gene-38.8-mRNA-1   | Japonica | NA       |               | Os07g0180900 | OsR498G0713631700.01.T01 | Ribosomal protein L4/L1 family                                        |
| maker-7-augustus-gene-39.4-mRNA-1   | Japonica | NA       |               | Os07g0182100 | OsR498G0713634400.01.T01 | Tryptophan synthase                                                   |
| maker-7-augustus-gene-39.9-mRNA-1   | Japonica | NA       |               | Os07g0182400 | OsR498G0713635400.01.T01 | Auxin-responsive protein (Fragment)                                   |
| maker-7-augustus-gene-40.44-mRNA-1  | Japonica | NA       |               |              | OsR498G0713637100.01.T03 | DNA (cytosine-5)-methyltransferase                                    |
| maker-7-augustus-gene-40.47-mRNA-1  | Japonica | NA       |               | Os07g0183200 | OsR498G0713638100.01.T01 | Auxin response factor                                                 |
| maker-7-augustus-gene-40.48-mRNA-1  | Japonica | NA       |               |              | OsR498G0713638300.01.T01 | Auxin response factor                                                 |
| maker-7-augustus-gene-40.55-mRNA-1  | Japonica | NA       |               |              | OsR498G0713640100.01.T01 | Auxin response factor                                                 |
| maker-7-augustus-gene-40.57-mRNA-1  | Japonica | NA       |               |              | OsR498G0713641900.01.T06 |                                                                       |
| maker-7-augustus-gene-40.59-mRNA-1  | Japonica | NA       |               | Os07g0184633 |                          |                                                                       |
| maker-7-augustus-gene-40.61-mRNA-1  | Japonica | NA       |               | Os07g0184800 | OsR498G0713643500.01.T01 | H15 domain-containing protein                                         |
| maker-7-augustus-gene-40.64-mRNA-1  | Japonica | NA       |               | Os07g0184900 | OsR498G0713643700.01.T04 | ATP-dependent DNA helicase 2 subunit                                  |

|                                    |          |          |           |              |                          |                                                                          |
|------------------------------------|----------|----------|-----------|--------------|--------------------------|--------------------------------------------------------------------------|
| maker-7-augustus-gene-40.65-mRNA-1 | Japonica | NA       |           | Os07g0184900 | OsR498G0713643700.01.T05 | ATP-dependent DNA helicase 2 subunit KU70                                |
| maker-7-augustus-gene-40.75-mRNA-1 | Japonica | NA       |           |              | OsR498G0713638000.01.T01 | Auxin response factor                                                    |
| maker-7-augustus-gene-40.77-mRNA-1 | Japonica | Indica   |           | Os03g0798600 | OsR498G0713641800.01.T01 | Ribosomal protein S19/S15                                                |
| maker-7-augustus-gene-40.80-mRNA-1 | Japonica | NA       | Kinase    | Os07g0185000 | OsR498G0713644600.01.T01 | Putative serine/threonine-protein kinase WNK9 (Fragment)                 |
| maker-7-augustus-gene-41.10-mRNA-1 | Japonica | Indica   |           | Os07g0185200 | OsR498G0713645200.01.T01 | START domain                                                             |
| maker-7-augustus-gene-41.2-mRNA-1  | Japonica | NA       |           | Os07g0185700 | OsR498G0713648100.01.T01 | HAUS-augin3 domain-containing protein (Fragment)                         |
| maker-7-augustus-gene-41.7-mRNA-1  | Japonica | NA       |           | Os07g0185800 | OsR498G0713648500.01.T03 | Associate of C-myc                                                       |
| maker-7-augustus-gene-42.24-mRNA-1 | Japonica | Japonica |           | Os07g0186400 | OsR498G0713651900.01.T05 | Chromatin remodeling protein EBS                                         |
| maker-7-augustus-gene-42.29-mRNA-1 | Japonica | NA       |           |              | OsR498G0713653700.01.T01 | D-2-hydroxyglutarate dehydrogenase mitochondrial                         |
| maker-7-augustus-gene-42.35-mRNA-1 | Japonica | NA       |           | Os07g0187700 | OsR498G0713655300.01.T01 |                                                                          |
| maker-7-augustus-gene-42.40-mRNA-1 | Japonica | NA       |           | Os07g0187300 | OsR498G0713654000.01.T01 | Glycine-rich RNA-binding protein RZ1C                                    |
| maker-7-augustus-gene-42.45-mRNA-1 | Japonica | NA       | NBS-TM    |              | OsR498G0713654200.01.T01 | AAA domain-containing protein                                            |
| maker-7-augustus-gene-43.44-mRNA-1 | Japonica | NA       |           | Os07g0188233 | OsR498G0713658300.01.T03 | Peptidylprolyl isomerase                                                 |
| maker-7-augustus-gene-43.48-mRNA-1 | Japonica | NA       |           | Os07g0188266 | OsR498G0713658300.01.T01 | Peptidylprolyl isomerase                                                 |
| maker-7-augustus-gene-43.51-mRNA-1 | Japonica | NA       |           | Os07g0188700 | OsR498G0713658500.01.T01 | Exostosin domain-containing protein                                      |
| maker-7-augustus-gene-43.53-mRNA-1 | Japonica | NA       |           | Os07g0188800 | OsR498G0713658700.01.T02 | Methylmalonate-semialdehyde dehydrogenase (CoA acylating)                |
| maker-7-augustus-gene-43.59-mRNA-1 | Japonica | NA       |           | Os07g0189700 | OsR498G0713661100.01.T02 | RING/U-box superfamily protein isoform 1                                 |
| maker-7-augustus-gene-43.61-mRNA-1 | Japonica | NA       |           | Os07g0188000 | OsR498G0713657800.01.T01 | Eukaryotic translation initiation factor 2C                              |
| maker-7-augustus-gene-43.64-mRNA-1 | Japonica | NA       |           |              | OsR498G0713660200.01.T01 | rRNA N-glycosidase                                                       |
| maker-7-augustus-gene-43.66-mRNA-1 | Japonica | NA       |           | Os07g0189800 | OsR498G0713661400.01.T01 | Rhomboid domain-containing protein                                       |
| maker-7-augustus-gene-44.29-mRNA-1 | Japonica | NA       |           | Os07g0190000 | OsR498G0713662100.01.T01 | 1-deoxy-D-xylulose-5-phosphate synthase                                  |
| maker-7-augustus-gene-46.7-mRNA-1  | Japonica | NA       |           | Os07g0193200 |                          | protein ACCELERATED CELL DEATH 6-like                                    |
| maker-7-augustus-gene-47.46-mRNA-1 | Japonica | NA       |           | Os07g0195400 | OsR498G0713687600.01.T01 | Phosphoacetylglucosamine mutase                                          |
| maker-7-augustus-gene-48.0-mRNA-1  | Japonica | NA       |           | Os07g0197100 | OsR498G0713693700.01.T01 | Phosphotransferase                                                       |
| maker-7-augustus-gene-48.2-mRNA-1  | Japonica | NA       |           |              | OsR498G0713690400.01.T03 |                                                                          |
| maker-7-augustus-gene-48.4-mRNA-1  | Japonica | NA       |           | Os07g0196700 |                          | NAC domain-containing protein                                            |
| maker-7-augustus-gene-48.6-mRNA-1  | Japonica | NA       |           | Os07g0197000 | OsR498G0713693400.01.T01 | UDPGT domain-containing protein                                          |
| maker-7-augustus-gene-49.0-mRNA-1  | Japonica | NA       |           | Os07g0198300 | OsR498G0713697500.01.T01 | AAI domain-containing protein                                            |
| maker-7-augustus-gene-49.2-mRNA-1  | Japonica | NA       |           |              | OsR498G0713699200.01.T05 |                                                                          |
| maker-7-augustus-gene-5.49-mRNA-1  | Japonica | Indica   |           | Os03g0764000 | OsR498G0713410800.01.T02 | probable N-acetyltransferase HLS1                                        |
| maker-7-augustus-gene-5.51-mRNA-1  | Japonica | NA       |           |              | OsR498G0713411800.01.T01 | Fusarium resistance protein I2C-5-like                                   |
| maker-7-augustus-gene-50.0-mRNA-1  | Japonica | NA       |           |              | OsR498G0713699200.01.T05 |                                                                          |
| maker-7-augustus-gene-50.18-mRNA-1 | Japonica | NA       |           | Os07g0201200 | OsR498G0713703700.01.T01 | Glycosyltransferase                                                      |
| maker-7-augustus-gene-50.20-mRNA-1 | Japonica | NA       |           |              |                          |                                                                          |
| maker-7-augustus-gene-50.21-mRNA-1 | Japonica | NA       |           |              | OsR498G0713701100.01.T01 |                                                                          |
| maker-7-augustus-gene-50.24-mRNA-1 | Japonica | NA       |           | Os07g0200000 | OsR498G0713699500.01.T01 | Exocyst complex component 8 (Fragment)                                   |
| maker-7-augustus-gene-50.6-mRNA-1  | Japonica | NA       |           | Os07g0200700 | OsR498G0713702900.01.T08 | Squalene synthase                                                        |
| maker-7-augustus-gene-51.42-mRNA-1 | Japonica | Indica   |           | Os07g0201500 | OsR498G0713704700.01.T01 | Glycosyltransferase                                                      |
| maker-7-augustus-gene-51.45-mRNA-1 | Japonica | Indica   |           | Os07g0201500 | OsR498G0713706100.01.T01 | Glycosyltransferase                                                      |
| maker-7-augustus-gene-51.47-mRNA-1 | Japonica | Japonica |           | Os07g0202900 | OsR498G0713708100.01.T04 | 28S ribosomal protein S29 mitochondrial                                  |
| maker-7-augustus-gene-51.50-mRNA-1 | Japonica | NA       |           |              | OsR498G0713709500.01.T02 | rRNA biogenesis protein rrp5                                             |
| maker-7-augustus-gene-51.56-mRNA-1 | Japonica | NA       |           | Os07g0202100 | OsR498G0713707000.01.T01 | Dead box ATP-dependent RNA helicase, putative isoform 1                  |
| maker-7-augustus-gene-51.61-mRNA-1 | Japonica | NA       |           | Os07g0202450 | OsR498G0713707600.01.T01 | Mitosis protein YLS8                                                     |
| maker-7-augustus-gene-52.0-mRNA-1  | Japonica | Japonica | Kinase-TM | Os07g0203900 | OsR498G0713710700.01.T01 | Proto-oncogene tyrosine-protein kinase YRK                               |
| maker-7-augustus-gene-52.11-mRNA-1 | Japonica | NA       |           |              | OsR498G0713714100.01.T01 | Adenine phosphoribosyltransferase 1, chloroplastic-like protein          |
| maker-7-augustus-gene-52.13-mRNA-1 | Japonica | NA       |           | Os07g0205000 | OsR498G0713714100.01.T04 | Cytochrome b-c1 complex subunit 7                                        |
| maker-7-augustus-gene-52.16-mRNA-1 | Japonica | Indica   |           | Os06g0649500 | OsR498G0713714700.01.T05 | Transcription initiation factor TFIID subunit like                       |
| maker-7-augustus-gene-52.23-mRNA-1 | Japonica | NA       |           |              | OsR498G0713710600.01.T03 | Cleavage and polyadenylation specificity factor (CPSF) A subunit protein |
| maker-7-augustus-gene-52.3-mRNA-1  | Japonica | Japonica |           | Os07g0204100 | OsR498G0713711700.01.T01 | Thioredoxin domain-containing protein                                    |
| maker-7-augustus-gene-52.5-mRNA-1  | Japonica | NA       |           | Os07g0204900 | OsR498G0713713900.01.T01 | Zeta-carotene desaturase                                                 |
| maker-7-augustus-gene-53.20-mRNA-1 | Japonica | NA       |           | Os07g0205500 | OsR498G0713716300.01.T01 | NEP-interacting protein 1                                                |
| maker-7-augustus-gene-53.27-mRNA-1 | Japonica | NA       |           | Os07g0205700 | OsR498G0713716800.01.T01 | Metallopeptidase M24 family protein isoform 1                            |
| maker-7-augustus-gene-53.32-mRNA-1 | Japonica | NA       |           | Os07g0205900 | OsR498G0713717000.01.T04 | ARM repeat superfamily protein                                           |
| maker-7-augustus-gene-53.36-mRNA-1 | Japonica | NA       |           | Os07g0206600 | OsR498G0713721400.01.T01 | Putative hexose transporter                                              |
| maker-7-augustus-gene-53.38-mRNA-1 | Japonica | Indica   |           | Os07g0206700 | OsR498G0713721600.01.T03 | Methyltransferase                                                        |
| maker-7-augustus-gene-55.50-mRNA-1 | Japonica | NA       |           | Os07g0209100 | OsR498G0713734600.01.T01 | Galactinol-raffinose galactosyltransferase                               |
| maker-7-augustus-gene-55.56-mRNA-1 | Japonica | NA       |           |              | OsR498G0713736200.01.T01 |                                                                          |
| maker-7-augustus-gene-6.0-mRNA-1   | Japonica | Japonica |           | Os07g0118300 | OsR498G0713415700.01.T01 | Golgi apparatus membrane protein TVP                                     |
| maker-7-augustus-gene-6.11-mRNA-1  | Japonica | Indica   |           | Os07g0117400 | OsR498G0713431000.01.T01 | Fusarium resistance protein I2C-5-like                                   |
| maker-7-augustus-gene-6.14-mRNA-1  | Japonica | NA       | Kinase-TM | Os07g0119000 | OsR498G0713419000.01.T01 | Mitogen-activated protein kinase kinase kinase YODA                      |
| maker-7-augustus-gene-6.5-mRNA-1   | Japonica | Indica   |           | Os07g0118800 | OsR498G0713418300.01.T01 | FBD domain-containing protein (Fragment)                                 |

|                                    |          |          |               |              |                          |                                                            |
|------------------------------------|----------|----------|---------------|--------------|--------------------------|------------------------------------------------------------|
| maker-7-augustus-gene-6.8-mRNA-1   | Japonica | Japonica |               | Os07g0118900 | OsR498G0713418700.01.T01 | FBD domain-containing protein                              |
| maker-7-augustus-gene-6.9-mRNA-1   | Japonica | Japonica |               | Os07g0117000 | OsR498G0713430800.01.T01 | Fusarium resistance protein I2C-5-like                     |
| maker-7-augustus-gene-63.19-mRNA-1 | Japonica | NA       |               | Os07g0222200 |                          | DUF4220 domain-containing protein (Fragment)               |
| maker-7-augustus-gene-63.21-mRNA-1 | Japonica | NA       |               | Os07g0222300 | OsR498G0713790800.01.T01 | Eukaryotic translation initiation factor 3 subunit E       |
| maker-7-augustus-gene-64.0-mRNA-1  | Japonica | Indica   |               | Os07g0222700 | OsR498G0713792500.01.T01 | Pentatricopeptide repeat-containing protein mitochondrial  |
| maker-7-augustus-gene-64.11-mRNA-1 | Japonica | Indica   |               | Os07g0223400 | OsR498G0713793300.01.T03 | ADP-ribosylation factor A1F                                |
| maker-7-augustus-gene-64.16-mRNA-1 | Japonica | Indica   |               | Os07g0223400 | OsR498G0713793700.01.T01 | ADP-ribosylation factor A1F                                |
| maker-7-augustus-gene-64.25-mRNA-1 | Japonica | NA       |               | Os01g0855400 | OsR498G0102361100.01.T01 | Octamer-binding transcription factor                       |
| maker-7-augustus-gene-64.4-mRNA-1  | Japonica | NA       |               | Os07g0222800 | OsR498G0713792700.01.T01 | Acyl carrier protein (Fragment)                            |
| maker-7-augustus-gene-64.6-mRNA-1  | Japonica | NA       |               |              | OsR498G0713792900.01.T01 | KHG/KDPG aldolase-like                                     |
| maker-7-augustus-gene-65.0-mRNA-1  | Japonica | NA       |               |              | OsR498G0713805100.01.T05 | Tryptophan/tyrosine permease                               |
| maker-7-augustus-gene-67.0-mRNA-1  | Japonica | NA       |               | Os07g0227400 | OsR498G0713819700.01.T01 | KH domain-containing protein SPIN1                         |
| maker-7-augustus-gene-67.4-mRNA-1  | Japonica | Japonica |               | Os07g0227700 | OsR498G0713821100.01.T02 | CUE domain-containing 5                                    |
| maker-7-augustus-gene-67.9-mRNA-1  | Japonica | NA       |               |              | OsR498G0713821600.01.T02 | ABC1 domain-containing protein (Fragment)                  |
| maker-7-augustus-gene-68.28-mRNA-1 | Japonica | Japonica |               | Os07g0228900 | OsR498G0713823200.01.T01 | FBD domain-containing protein                              |
| maker-7-augustus-gene-68.29-mRNA-1 | Japonica | NA       |               | Os07g0229100 | OsR498G0713823200.01.T01 | F-box domain-containing protein                            |
| maker-7-augustus-gene-68.31-mRNA-1 | Japonica | NA       |               | Os07g0229200 | OsR498G0713823800.01.T01 | F-box domain-containing protein (Fragment)                 |
| maker-7-augustus-gene-68.33-mRNA-1 | Japonica | NA       |               | Os07g0229700 | OsR498G0713824600.01.T01 | Transcription elongation factor TFIIS                      |
| maker-7-augustus-gene-68.35-mRNA-1 | Japonica | Indica   |               | Os07g0229800 | OsR498G0713824800.01.T03 | Glycerol-3-phosphate dehydrogenase [NAD(+)], chloroplastic |
| maker-7-augustus-gene-68.42-mRNA-1 | Japonica | Japonica |               | Os07g0230500 | OsR498G0713825800.01.T01 | Structure-specific endonuclease subunit SLX1 homolog       |
| maker-7-augustus-gene-69.0-mRNA-1  | Japonica | Indica   |               | Os07g0231400 | OsR498G0713827300.01.T01 | Lysine histidine transporter 1                             |
| maker-7-augustus-gene-69.11-mRNA-1 | Japonica | NA       |               | Os07g0231900 |                          |                                                            |
| maker-7-augustus-gene-69.3-mRNA-1  | Japonica | NA       |               | Os07g0231800 | OsR498G0713830700.01.T03 | Neuronal PAS domain-containing protein 4                   |
| maker-7-augustus-gene-69.6-mRNA-1  | Japonica | NA       |               | Os07g0232200 | OsR498G0713831300.01.T02 | Cytochrome b5 domain-containing protein RLF                |
| maker-7-augustus-gene-69.9-mRNA-1  | Japonica | NA       |               | Os07g0230700 | OsR498G0713826600.01.T01 |                                                            |
| maker-7-augustus-gene-7.0-mRNA-1   | Japonica | Japonica |               | Os07g0119100 | OsR498G0713419300.01.T01 |                                                            |
| maker-7-augustus-gene-7.10-mRNA-1  | Japonica | NA       |               |              |                          | NB-ARC domain-containing protein (Fragment)                |
| maker-7-augustus-gene-7.11-mRNA-1  | Japonica | Indica   |               | Os07g0120400 | OsR498G0713425000.01.T01 | F-box domain-containing protein (Fragment)                 |
| maker-7-augustus-gene-7.12-mRNA-1  | Japonica | Japonica |               | Os07g0120400 | OsR498G0713425200.01.T03 | F-box domain-containing protein (Fragment)                 |
| maker-7-augustus-gene-7.3-mRNA-1   | Japonica | NA       |               | Os07g0119300 | OsR498G0713421700.01.T01 | HTH myb-type domain-containing protein                     |
| maker-7-augustus-gene-7.39-mRNA-1  | Japonica | NA       | Kinase-LRR-TM | Os07g0121200 | OsR498G0713427200.01.T01 | Putative LRR receptor-like serine/threonine-protein kinase |
| maker-7-augustus-gene-7.6-mRNA-1   | Japonica | NA       |               | Os07g0119400 | OsR498G0713422500.01.T01 | SKU5 similar 17 isoform 1                                  |
| maker-7-augustus-gene-7.8-mRNA-1   | Japonica | NA       |               |              |                          |                                                            |
| maker-7-augustus-gene-70.33-mRNA-1 | Japonica | Indica   | Kinase-TM     | Os07g0534500 | OsR498G0713832100.01.T01 | Cysteine-rich receptor-like protein kinase 29              |
| maker-7-augustus-gene-70.35-mRNA-1 | Japonica | NA       |               |              | OsR498G0713833100.01.T01 | ZIP zinc/iron transport family protein                     |
| maker-7-augustus-gene-70.43-mRNA-1 | Japonica | NA       |               | Os07g0232900 | OsR498G0713834000.01.T01 | Heavy metal transporter 3                                  |
| maker-7-augustus-gene-70.46-mRNA-1 | Japonica | NA       |               | Os07g0233300 | OsR498G0713834800.01.T02 | Alfin-like transcription factor                            |
| maker-7-augustus-gene-71.0-mRNA-1  | Japonica | NA       |               | Os07g0235800 | OsR498G0713843700.01.T07 | Spelt factor protein                                       |
| maker-7-augustus-gene-71.5-mRNA-1  | Japonica | NA       |               |              | OsR498G0713839300.01.T01 |                                                            |
| maker-7-augustus-gene-72.37-mRNA-1 | Japonica | Indica   |               | Os07g0236800 | OsR498G0713849700.01.T03 | Vacuolar protein sorting-associated protein 1              |
| maker-7-augustus-gene-72.42-mRNA-1 | Japonica | NA       |               | Os07g0237100 | OsR498G0713850000.01.T03 | THO complex subunit 4                                      |
| maker-7-augustus-gene-73.0-mRNA-1  | Japonica | Japonica |               | Os07g0238700 | OsR498G0713854700.01.T03 | 5'-3' exoribonuclease                                      |
| maker-7-augustus-gene-73.3-mRNA-1  | Japonica | Indica   |               | Os12g0106900 | OsR498G0713855000.01.T01 | Kinesin-like protein KIN-UA                                |
| maker-7-augustus-gene-73.5-mRNA-1  | Japonica | NA       |               | Os07g0239200 | OsR498G0713855600.01.T01 |                                                            |
| maker-7-augustus-gene-73.7-mRNA-1  | Japonica | NA       |               | Os07g0239400 | OsR498G0713855800.01.T01 | RAB GTPase homolog 8A                                      |
| maker-7-augustus-gene-74.0-mRNA-1  | Japonica | NA       |               | Os07g0240200 | OsR498G0713858900.01.T01 | Glucan endo-1,3-beta-D-glucosidase                         |
| maker-7-augustus-gene-74.2-mRNA-1  | Japonica | NA       |               | Os07g0240300 | OsR498G0713859300.01.T01 | Protein RETICULATA chloroplastic                           |
| maker-7-augustus-gene-74.8-mRNA-1  | Japonica | NA       |               | Os07g0240700 | OsR498G0713861300.01.T01 | DIMBOA UDP-glucosyltransferase BX8                         |
| maker-7-augustus-gene-75.44-mRNA-1 | Japonica | NA       |               | Os07g0241500 | OsR498G0713863300.01.T01 | DIMBOA UDP-glucosyltransferase BX9                         |
| maker-7-augustus-gene-75.46-mRNA-1 | Japonica | NA       |               | Os07g0241600 | OsR498G0713863500.01.T01 | DIMBOA UDP-glucosyltransferase BX9                         |
| maker-7-augustus-gene-75.47-mRNA-1 | Japonica | NA       |               | Os07g0241700 | OsR498G0713864300.01.T01 | DIMBOA UDP-glucosyltransferase BX8                         |
| maker-7-augustus-gene-75.49-mRNA-1 | Japonica | NA       |               |              |                          | Putative ribosomal RNA apurinic site specific lyase        |
| maker-7-augustus-gene-75.51-mRNA-1 | Japonica | NA       |               |              |                          | F-box domain-containing protein                            |
| maker-7-augustus-gene-75.53-mRNA-1 | Japonica | Indica   |               | Os07g0243000 | OsR498G0713868400.01.T01 | DIMBOA UDP-glucosyltransferase BX8                         |
| maker-7-augustus-gene-76.52-mRNA-1 | Japonica | NA       |               | Os07g0244300 | OsR498G0713871900.01.T01 | Organic solute transporter Ost-alpha                       |
| maker-7-augustus-gene-76.56-mRNA-1 | Japonica | Japonica |               | Os07g0244600 | OsR498G0713873700.01.T02 | Agmatine coumaroyltransferase                              |
| maker-7-augustus-gene-76.58-mRNA-1 | Japonica | NA       |               | Os07g0243100 | OsR498G0713868800.01.T02 | Mitochondrial import inner membrane translocase            |
| maker-7-augustus-gene-76.61-mRNA-1 | Japonica | NA       |               | Os07g0243200 | OsR498G0713869000.01.T03 | Glucose-1-phosphate adenylyltransferase                    |
| maker-7-augustus-gene-76.66-mRNA-1 | Japonica | NA       |               | Os07g0244200 | OsR498G0713871400.01.T01 | Benzyl alcohol O-benzoyltransferase                        |
| maker-7-augustus-gene-76.68-mRNA-1 | Japonica | NA       |               | Os07g0244900 | OsR498G0713874400.01.T01 |                                                            |
| maker-7-augustus-gene-77.29-mRNA-1 | Japonica | Indica   |               | Os07g0245100 | OsR498G0713875100.01.T04 | tRNA-specific adenosine deaminase                          |

|                                    |          |          |               |              |                          |                                                                          |
|------------------------------------|----------|----------|---------------|--------------|--------------------------|--------------------------------------------------------------------------|
| maker-7-augustus-gene-77.38-mRNA-1 | Japonica | NA       |               | Os07g0245200 | OsR498G0713875600.01.T04 | Polygalacturonase                                                        |
| maker-7-augustus-gene-78.38-mRNA-1 | Japonica | NA       |               | Os07g0247100 | OsR498G0713879500.01.T02 | S-adenosyl-L-methionine-dependent methyltransferase                      |
| maker-7-augustus-gene-78.42-mRNA-1 | Japonica | NA       |               | Os07g0246600 | OsR498G0713878200.01.T05 | Protein transport protein SEC13 B                                        |
| maker-7-augustus-gene-78.47-mRNA-1 | Japonica | NA       |               |              | OsR498G0713882600.01.T01 | F-box domain-containing protein                                          |
| maker-7-augustus-gene-79.40-mRNA-1 | Japonica | NA       |               | Os07g0249200 | OsR498G0713886300.01.T01 | Vesicle-associated membrane protein 724                                  |
| maker-7-augustus-gene-79.43-mRNA-1 | Japonica | NA       |               | Os07g0249600 | OsR498G0713887500.01.T01 | mRNA-decapping enzyme-like protein (Fragment)                            |
| maker-7-augustus-gene-79.49-mRNA-1 | Japonica | NA       |               | Os07g0250300 | OsR498G0713889300.01.T01 | NAC domain-containing protein 40                                         |
| maker-7-augustus-gene-79.52-mRNA-1 | Japonica | Indica   |               | Os07g0248800 | OsR498G0713885000.01.T02 | BZIP domain-containing protein                                           |
| maker-7-augustus-gene-79.56-mRNA-1 | Japonica | NA       |               | Os07g0249100 | OsR498G0713885800.01.T01 | Pentatricopeptide repeat-containing protein isoform A                    |
| maker-7-augustus-gene-79.57-mRNA-1 | Japonica | Indica   |               | Os03g0836900 | OsR498G0713887800.01.T01 | IAA-amino acid hydrolase ILR1                                            |
| maker-7-augustus-gene-79.59-mRNA-1 | Japonica | Indica   |               | Os07g0249800 | OsR498G0713888000.01.T01 | IAA-amino acid hydrolase ILR1                                            |
| maker-7-augustus-gene-79.62-mRNA-1 | Japonica | Indica   |               | Os03g0836900 | OsR498G0713888200.01.T01 | IAA-amino acid hydrolase ILR1                                            |
| maker-7-augustus-gene-79.64-mRNA-1 | Japonica | NA       |               | Os07g0250166 |                          | Glycosyltransferase                                                      |
| maker-7-augustus-gene-8.42-mRNA-1  | Japonica | NA       |               |              |                          | WRKY domain-containing protein                                           |
| maker-7-augustus-gene-8.43-mRNA-1  | Japonica | NA       |               | Os07g0122400 | OsR498G0713430100.01.T01 | NASP-related protein sim3                                                |
| maker-7-augustus-gene-8.46-mRNA-1  | Japonica | NA       |               | Os07g0122900 | OsR498G0713432100.01.T02 | F-box domain-containing protein                                          |
| maker-7-augustus-gene-8.49-mRNA-1  | Japonica | Japonica |               | Os07g0123000 | OsR498G0101324300.01.T01 | F-box domain containing protein, expressed                               |
| maker-7-augustus-gene-8.52-mRNA-1  | Japonica | Indica   |               | Os07g0123300 | OsR498G0713433200.01.T03 | Plastid division protein PDV2                                            |
| maker-7-augustus-gene-8.54-mRNA-1  | Japonica | Indica   |               | Os03g0769000 | OsR498G0713433400.01.T01 | Ternary complex factor MIP1                                              |
| maker-7-augustus-gene-8.58-mRNA-1  | Japonica | NA       |               | Os07g0123500 | OsR498G0713434400.01.T01 | BTB domain-containing protein                                            |
| maker-7-augustus-gene-81.0-mRNA-1  | Japonica | NA       | Kinase-LRR-TM | Os07g0251900 | OsR498G0713893500.01.T01 | Putative LRR receptor-like serine/threonine-protein kinase               |
| maker-7-augustus-gene-81.1-mRNA-1  | Japonica | NA       |               | Os07g0252000 | OsR498G0713894700.01.T03 | Probable cytosolic iron-sulfur protein assembly protein CIAO1 homolog    |
| maker-7-augustus-gene-81.12-mRNA-1 | Japonica | NA       |               | Os07g0252800 | OsR498G0713897300.01.T01 |                                                                          |
| maker-7-augustus-gene-81.14-mRNA-1 | Japonica | NA       |               | Os07g0253000 | OsR498G0713898100.01.T02 |                                                                          |
| maker-7-augustus-gene-81.7-mRNA-1  | Japonica | NA       |               | Os07g0252400 | OsR498G0713895900.01.T03 | Cellulose synthase                                                       |
| maker-7-augustus-gene-82.30-mRNA-1 | Japonica | NA       |               | Os06g0602200 | OsR498G0306739200.01.T01 | Probable bifunctional methylthioribulose-1-phosphate dehydratase/enolase |
| maker-7-augustus-gene-84.0-mRNA-1  | Japonica | NA       |               | Os07g0256200 | OsR498G0713912700.01.T01 | RRM domain-containing protein                                            |
| maker-7-augustus-gene-84.2-mRNA-1  | Japonica | NA       |               | Os07g0256700 | OsR498G0713913700.01.T01 | Leaf senescence protein-like                                             |
| maker-7-augustus-gene-84.4-mRNA-1  | Japonica | Indica   |               | Os07g0256050 | OsR498G0713911400.01.T01 | Leaf senescence protein-like                                             |
| maker-7-augustus-gene-84.7-mRNA-1  | Japonica | NA       |               |              | OsR498G0713913000.01.T01 |                                                                          |
| maker-7-augustus-gene-85.0-mRNA-1  | Japonica | Japonica |               | Os07g0258000 | OsR498G0102089900.01.T03 | DUF1618 domain-containing protein (Fragment)                             |
| maker-7-augustus-gene-85.10-mRNA-1 | Japonica | NA       |               |              | OsR498G0713921200.01.T01 | Ubiquitin carboxyl-terminal hydrolase                                    |
| maker-7-augustus-gene-85.6-mRNA-1  | Japonica | Indica   |               | Os07g0258100 | OsR498G0713921000.01.T02 | Alanyl-tRNA-synthetase+family                                            |
| maker-7-augustus-gene-86.23-mRNA-1 | Japonica | NA       |               | Os07g0258400 | OsR498G0713923500.01.T04 | Root-specific metal transporter                                          |
| maker-7-augustus-gene-86.29-mRNA-1 | Japonica | NA       |               | Os07g0258700 | OsR498G0713924700.01.T02 | BTB/POZ domain-containing protein At4g08455                              |
| maker-7-augustus-gene-86.31-mRNA-1 | Japonica | NA       |               |              | OsR498G0713925000.01.T01 |                                                                          |
| maker-7-augustus-gene-86.34-mRNA-1 | Japonica | NA       |               | Os07g0259100 | OsR498G0713926400.01.T01 | Ethylene receptor                                                        |
| maker-7-augustus-gene-86.36-mRNA-1 | Japonica | NA       |               | Os07g0259700 | OsR498G0713929600.01.T02 | BTB/POZ domain-containing protein At2g13690                              |
| maker-7-augustus-gene-87.28-mRNA-1 | Japonica | NA       |               | Os07g0260300 | OsR498G0713933300.01.T01 | Thioredoxin domain-containing protein (Fragment)                         |
| maker-7-augustus-gene-87.32-mRNA-1 | Japonica | NA       |               | Os07g0260000 |                          | Pentatricopeptide repeat-containing protein, chloroplastic               |
| maker-7-augustus-gene-87.36-mRNA-1 | Japonica | NA       |               | Os07g0260400 | OsR498G0713933600.01.T02 | Phospholipase D                                                          |
| maker-7-augustus-gene-87.40-mRNA-1 | Japonica | NA       |               |              | OsR498G0713935400.01.T01 | CCT motif family protein, expressed                                      |
| maker-7-augustus-gene-88.0-mRNA-1  | Japonica | NA       |               | Os07g0262200 | OsR498G0713938000.01.T03 | Prohibitin                                                               |
| maker-7-augustus-gene-89.4-mRNA-1  | Japonica | NA       |               | Os07g0264100 | OsR498G0713942700.01.T04 | Hydroxypyruvate reductase-like                                           |
| maker-7-augustus-gene-89.7-mRNA-1  | Japonica | NA       | Kinase-TM     |              |                          | Clade IV lectin receptor kinase                                          |
| maker-7-augustus-gene-9.0-mRNA-1   | Japonica | NA       |               | Os07g0124500 | OsR498G0713437900.01.T03 | Eukaryotic translation initiation factor 3 subunit C                     |
| maker-7-augustus-gene-9.10-mRNA-1  | Japonica | NA       |               |              |                          | Phospholipase A-2-activating protein isoform A                           |
| maker-7-augustus-gene-9.17-mRNA-1  | Japonica | Indica   |               | Os07g0124100 | OsR498G0713436800.01.T01 | Phytosulfokine-alpha                                                     |
| maker-7-augustus-gene-90.30-mRNA-1 | Japonica | NA       |               | Os07g0264800 | OsR498G0713943700.01.T02 | Acyl-CoA N-acyltransferases super family protein                         |
| maker-7-augustus-gene-90.34-mRNA-1 | Japonica | NA       |               | Os07g0265100 | OsR498G0713944100.01.T02 |                                                                          |
| maker-7-augustus-gene-91.0-mRNA-1  | Japonica | NA       |               | Os07g0265600 | OsR498G0713955100.01.T01 | Piwi domain-containing protein                                           |
| maker-7-augustus-gene-91.1-mRNA-1  | Japonica | NA       |               |              | OsR498G0713955100.01.T01 | Eukaryotic translation initiation factor 2c, putative isoform 1          |
| maker-7-augustus-gene-92.3-mRNA-1  | Japonica | Japonica |               | Os07g0267400 | OsR498G1221850900.01.T02 | Hydroxyproline-rich glycoprotein-like protein                            |
| maker-7-augustus-gene-95.37-mRNA-1 | Japonica | NA       |               | Os07g0269800 |                          | F-box domain-containing protein                                          |
| maker-7-augustus-gene-96.27-mRNA-1 | Japonica | NA       |               | Os07g0270900 | OsR498G0713968500.01.T03 | t-SNARE coiled-coil homology domain-containing protein                   |
| maker-7-augustus-gene-96.32-mRNA-1 | Japonica | NA       |               | Os07g0271500 | OsR498G0713970500.01.T01 | Bisdemethoxycurcumin synthase                                            |
| maker-7-augustus-gene-96.39-mRNA-1 | Japonica | Indica   |               | Os07g0271000 | OsR498G0713969200.01.T02 | Guanosine nucleotide diphosphate dissociation inhibitor                  |
| maker-7-augustus-gene-96.44-mRNA-1 | Japonica | NA       |               | Os07g0271600 |                          |                                                                          |
| maker-7-augustus-gene-97.2-mRNA-1  | Japonica | NA       |               |              | OsR498G0713972700.01.T01 |                                                                          |
| maker-7-augustus-gene-97.4-mRNA-1  | Japonica | Indica   |               | Os03g0843300 | OsR498G0713971400.01.T01 | Salt tolerance protein II                                                |
| maker-7-augustus-gene-97.5-mRNA-1  | Japonica | NA       |               |              | OsR498G0713977200.01.T02 | Chromatin assembly factor 1 subunit FAS1                                 |

|                                     |          |          |            |              |                          |                                                                         |
|-------------------------------------|----------|----------|------------|--------------|--------------------------|-------------------------------------------------------------------------|
| maker-7-augustus-gene-97.8-mRNA-1   | Japonica | NA       | NBS-TM     |              | OsR498G0713986700.01.T02 | Putative disease resistance RPP13-like protein 1                        |
| maker-7-augustus-gene-98.0-mRNA-1   | Japonica | NA       |            | Os07g0274400 | OsR498G0713984800.01.T01 | NADH-ubiquinone reductase complex 1 MLRQ subunit                        |
| maker-7-augustus-gene-98.10-mRNA-1  | Japonica | NA       |            | Os07g0274100 | OsR498G0713985100.01.T04 | Metallophos domain-containing protein (Fragment)                        |
| maker-7-augustus-gene-98.2-mRNA-1   | Japonica | Indica   |            | Os07g0274700 | OsR498G0713984400.01.T01 | G-box binding protein-like                                              |
| maker-7-augustus-gene-98.5-mRNA-1   | Japonica | NA       | LRR-NBS-TM | Os07g0273700 | OsR498G0713986100.01.T01 | WRKY domain-containing protein                                          |
| maker-7-augustus-gene-98.8-mRNA-1   | Japonica | NA       |            |              | OsR498G0100693500.01.T01 | Transposon protein, putative, Mutator sub-class                         |
| maker-7-augustus-gene-99.0-mRNA-1   | Japonica | NA       |            | Os07g0274800 | OsR498G0713984000.01.T01 | Serine/threonine protein phosphatase 2A regulatory subunit              |
| maker-7-augustus-gene-99.2-mRNA-1   | Japonica | Indica   |            | Os12g0564400 | OsR498G0713983000.01.T01 | PsbP domain-containing protein 1 chloroplastic                          |
| maker-7-augustus-gene-99.5-mRNA-1   | Japonica | NA       |            | Os07g0275300 | OsR498G0713981800.01.T02 | RING/U-box superfamily protein                                          |
| maker-8-augustus-gene-1.26-mRNA-1   | Japonica | NA       |            | Os08g0100500 | OsR498G0815023300.01.T06 | ENHANCER OF AG-4 protein 2                                              |
| maker-8-augustus-gene-1.31-mRNA-1   | Japonica | NA       |            |              | OsR498G0815023500.01.T01 | CID domain-containing protein                                           |
| maker-8-augustus-gene-1.35-mRNA-1   | Japonica | Indica   |            | Os08g0100700 | OsR498G0815023900.01.T02 | Basic proline-rich protein isoform X2                                   |
| maker-8-augustus-gene-1.43-mRNA-1   | Japonica | NA       |            | Os08g0100800 | OsR498G0815024100.01.T06 | Putative homeodomain-like transcription factor superfamily protein      |
| maker-8-augustus-gene-1.47-mRNA-1   | Japonica | Indica   |            | Os10g0188900 | OsR498G0815025100.01.T01 | Oxidoreductase zinc-binding dehydrogenase family protein                |
| maker-8-augustus-gene-1.56-mRNA-1   | Japonica | NA       |            | Os08g0101800 | OsR498G0815026500.01.T01 | CAP10 domain-containing protein (Fragment)                              |
| maker-8-augustus-gene-1.58-mRNA-1   | Japonica | Indica   |            | Os04g0460400 | OsR498G0815026700.01.T01 | Casparian strip membrane protein 2                                      |
| maker-8-augustus-gene-1.61-mRNA-1   | Japonica | Indica   |            | Os08g0100200 | OsR498G0815022800.01.T03 | ZIP metal ion transporter                                               |
| maker-8-augustus-gene-1.64-mRNA-1   | Japonica | Indica   |            | Os08g0100400 | OsR498G0815023200.01.T02 | RING-CH-type domain-containing protein                                  |
| maker-8-augustus-gene-1.71-mRNA-1   | Japonica | NA       |            |              |                          | B3 DNA binding domain                                                   |
| maker-8-augustus-gene-1.76-mRNA-1   | Japonica | NA       |            | Os08g0101100 | OsR498G0815025000.01.T02 | High mobility group B protein 7                                         |
| maker-8-augustus-gene-1.78-mRNA-1   | Japonica | NA       |            | Os08g0101600 | OsR498G0815025800.01.T01 | Single-strand DNA endonuclease 1                                        |
| maker-8-augustus-gene-100.29-mRNA-1 | Japonica | Indica   |            | Os08g0260000 | OsR498G0815569500.01.T04 | Acyl-CoA N-acyltransferases (NAT) superfamily protein isoform 1         |
| maker-8-augustus-gene-104.2-mRNA-1  | Japonica | NA       |            |              | OsR498G0815591300.01.T02 | DNA-directed RNA polymerase III subunit RPC5                            |
| maker-8-augustus-gene-107.39-mRNA-1 | Japonica | NA       |            |              | OsR498G0612846200.01.T01 | GRF-type domain-containing protein                                      |
| maker-8-augustus-gene-107.41-mRNA-1 | Japonica | NA       |            | Os08g0272000 | OsR498G0815603000.01.T01 | Multivesicular body subunit 12B like                                    |
| maker-8-augustus-gene-108.43-mRNA-1 | Japonica | Japonica |            | Os08g0274700 | OsR498G0815612100.01.T06 | Sld5 domain-containing protein (Fragment)                               |
| maker-8-augustus-gene-109.3-mRNA-1  | Japonica | NA       |            |              |                          | Transmembrane 9 superfamily member                                      |
| maker-8-augustus-gene-11.0-mRNA-1   | Japonica | NA       |            | Os08g0118000 | OsR498G0815081500.01.T01 | AT-hook motif nuclear-localized protein (Fragment)                      |
| maker-8-augustus-gene-11.11-mRNA-1  | Japonica | NA       |            | Os08g0119300 |                          |                                                                         |
| maker-8-augustus-gene-11.14-mRNA-1  | Japonica | NA       |            | Os08g0118100 | OsR498G0815082600.01.T01 | Amino acid binding protein, putative                                    |
| maker-8-augustus-gene-11.16-mRNA-1  | Japonica | Japonica |            | Os08g0119700 | OsR498G0815087000.01.T01 | CCT domain-containing protein (Fragment)                                |
| maker-8-augustus-gene-11.19-mRNA-1  | Japonica | NA       |            | Os08g0120000 | OsR498G0815087400.01.T04 | Succinate dehydrogenase [ubiquinone] iron-sulfur subunit, mitochondrial |
| maker-8-augustus-gene-11.4-mRNA-1   | Japonica | NA       |            | Os08g0118900 | OsR498G0815084900.01.T01 | Adenylate kinase                                                        |
| maker-8-augustus-gene-11.7-mRNA-1   | Japonica | NA       |            | Os08g0119000 | OsR498G0815085300.01.T02 | COP9 signalosome complex subunit 3                                      |
| maker-8-augustus-gene-111.33-mRNA-1 | Japonica | Japonica |            | Os08g0278966 | OsR498G0815628300.01.T01 | Splicing factor subunit                                                 |
| maker-8-augustus-gene-114.2-mRNA-1  | Japonica | NA       |            |              | OsR498G0815635100.01.T01 | Reticulon domain-containing protein                                     |
| maker-8-augustus-gene-12.33-mRNA-1  | Japonica | NA       |            | Os08g0120200 | OsR498G0815088900.01.T03 | AAA domain-containing protein                                           |
| maker-8-augustus-gene-12.36-mRNA-1  | Japonica | NA       |            | Os08g0120500 | OsR498G0815089600.01.T01 | Neoplastic transformation suppressor Pcd4/MA-3, contains MA3 domain     |
| maker-8-augustus-gene-12.40-mRNA-1  | Japonica | NA       |            | Os08g0120600 | OsR498G0815090000.01.T01 | Fructose-bisphosphate aldolase                                          |
| maker-8-augustus-gene-121.43-mRNA-1 | Japonica | NA       |            | Os08g0290100 | OsR498G0815665000.01.T03 | Aberrant root formation protein 4                                       |
| maker-8-augustus-gene-123.0-mRNA-1  | Japonica | Indica   |            | Os08g0292900 | OsR498G0815676500.01.T01 | Homeobox protein knotted-1-like 3 isoform B                             |
| maker-8-augustus-gene-123.5-mRNA-1  | Japonica | NA       | CC-NBS-TM  | Os08g0293300 | OsR498G0815678600.01.T02 | Disease resistance protein RPM1                                         |
| maker-8-augustus-gene-125.37-mRNA-1 | Japonica | NA       |            | Os08g0307500 |                          | PHD finger protein ING                                                  |
| maker-8-augustus-gene-127.38-mRNA-1 | Japonica | NA       |            | Os07g0165500 | OsR498G0203722500.01.T01 | Cytokinin inducible protein-like                                        |
| maker-8-augustus-gene-127.40-mRNA-1 | Japonica | NA       |            | Os08g0305300 | OsR498G0815720600.01.T05 | DNA/RNA-binding domain                                                  |
| maker-8-augustus-gene-128.20-mRNA-1 | Japonica | NA       |            | Os08g0300200 | OsR498G0815704000.01.T02 | Synaptotagmin-5                                                         |
| maker-8-augustus-gene-128.35-mRNA-1 | Japonica | NA       |            |              |                          | Fatty acyl-CoA reductase                                                |
| maker-8-augustus-gene-13.46-mRNA-1  | Japonica | NA       |            | Os08g0121900 | OsR498G0815093800.01.T01 | Glycosyltransferase                                                     |
| maker-8-augustus-gene-13.48-mRNA-1  | Japonica | NA       |            | Os08g0122000 | OsR498G0815094200.01.T01 | Serine/threonine protein phosphatase 2A regulatory subunit              |
| maker-8-augustus-gene-135.46-mRNA-1 | Japonica | NA       |            | Os12g0543800 | OsR498G1221808400.01.T01 | Putative glutathione transferase                                        |
| maker-8-augustus-gene-135.57-mRNA-1 | Japonica | NA       |            |              | OsR498G0815745000.01.T05 | CUE domain-containing protein (Fragment)                                |
| maker-8-augustus-gene-14.37-mRNA-1  | Japonica | NA       |            | Os11g0175500 | OsR498G1119504300.01.T05 | E3 ubiquitin-protein ligase CHFR                                        |
| maker-8-augustus-gene-143.0-mRNA-1  | Japonica | Indica   |            | Os08g0150800 | OsR498G0815763300.01.T01 | Tyrosyl-tRNA synthetase                                                 |
| maker-8-augustus-gene-143.29-mRNA-1 | Japonica | NA       |            | Os08g0319900 | OsR498G0815763200.01.T02 | Cyclase-like protein 3                                                  |
| maker-8-augustus-gene-143.33-mRNA-1 | Japonica | NA       |            | Os08g0320200 | OsR498G0815765000.01.T02 | Oligopeptide transporter                                                |
| maker-8-augustus-gene-143.7-mRNA-1  | Japonica | NA       |            |              |                          | Heterogeneous nuclear ribonucleoprotein like                            |
| maker-8-augustus-gene-148.32-mRNA-1 | Japonica | Japonica |            | Os08g0326500 | OsR498G0815786100.01.T01 | (1->3)-beta-glucan endohydrolase                                        |
| maker-8-augustus-gene-148.34-mRNA-1 | Japonica | NA       |            | Os08g0326100 | OsR498G0815784400.01.T01 | Nuclear inhibitor of protein phosphatase                                |
| maker-8-augustus-gene-148.36-mRNA-1 | Japonica | NA       |            | Os08g0326400 | OsR498G0815785200.01.T01 |                                                                         |
| maker-8-augustus-gene-150.35-mRNA-1 | Japonica | NA       |            | Os08g0328300 | OsR498G0815792700.01.T05 | ENT domain-containing protein (Fragment)                                |
| maker-8-augustus-gene-150.41-mRNA-1 | Japonica | NA       |            |              |                          | DUF1618 domain-containing protein (Fragment)                            |

|                                     |          |          |              |              |                          |                                                               |
|-------------------------------------|----------|----------|--------------|--------------|--------------------------|---------------------------------------------------------------|
| maker-8-augustus-gene-152.35-mRNA-1 | Japonica | Indica   |              | Os09g0281900 | OsR498G0815804700.01.T04 | Mediator of RNA polymerase II transcription subunit 14        |
| maker-8-augustus-gene-152.46-mRNA-1 | Japonica | NA       |              | Os08g0332700 | OsR498G0815804200.01.T04 | Dipeptidase 3 (Fragment)                                      |
| maker-8-augustus-gene-153.0-mRNA-1  | Japonica | NA       |              |              | OsR498G0815813000.01.T01 | Pre-mRNA-splicing factor ATP-dependent RNA helicase DEAH1     |
| maker-8-augustus-gene-155.33-mRNA-1 | Japonica | NA       |              |              | OsR498G0815821700.01.T01 |                                                               |
| maker-8-augustus-gene-156.24-mRNA-1 | Japonica | NA       |              |              | OsR498G0815825100.01.T01 | Golgin subfamily A member 6-like protein 22 isoform X2        |
| maker-8-augustus-gene-156.26-mRNA-1 | Japonica | NA       |              | Os08g0339200 | OsR498G0815827700.01.T03 | D-aminoacyl-tRNA deacylase-like                               |
| maker-8-augustus-gene-158.14-mRNA-1 | Japonica | NA       |              |              | OsR498G0101949000.01.T01 |                                                               |
| maker-8-augustus-gene-158.6-mRNA-1  | Japonica | NA       |              | Os03g0340600 |                          |                                                               |
| maker-8-augustus-gene-158.8-mRNA-1  | Japonica | NA       | Kinase-TM    | Os08g0343000 | OsR498G0815840500.01.T03 | Proline-rich receptor-like protein kinase PERK14 isoform X5   |
| maker-8-augustus-gene-159.8-mRNA-1  | Japonica | NA       |              | Os08g0344100 | OsR498G0815843500.01.T02 | Histone deacetylase                                           |
| maker-8-augustus-gene-16.0-mRNA-1   | Japonica | NA       |              | Os08g0126300 | OsR498G0815102700.01.T04 | Glyceraldehyde-3-phosphate dehydrogenase                      |
| maker-8-augustus-gene-16.11-mRNA-1  | Japonica | Japonica | Kinase-TM    | Os08g0125200 | OsR498G0815100800.01.T01 | Putative receptor-type protein kinase LRK1                    |
| maker-8-augustus-gene-16.13-mRNA-1  | Japonica | Indica   | CC-Kinase-TM | Os08g0125800 | OsR498G0815100800.01.T01 | Putative receptor-type protein kinase LRK1                    |
| maker-8-augustus-gene-16.6-mRNA-1   | Japonica | NA       |              | Os08g0126700 | OsR498G0815103300.01.T02 | Zinc finger CCCH domain-containing protein 54                 |
| maker-8-augustus-gene-161.1-mRNA-1  | Japonica | Indica   |              | Os09g0299200 | OsR498G0815853100.01.T03 | MYB-CC type transfactor                                       |
| maker-8-augustus-gene-162.28-mRNA-1 | Japonica | NA       |              |              |                          | Photosystem II PsbP, oxygen evolving complex                  |
| maker-8-augustus-gene-17.0-mRNA-1   | Japonica | NA       |              | Os08g0127100 | OsR498G0815104300.01.T01 | Lysine histidine transporter like                             |
| maker-8-augustus-gene-17.10-mRNA-1  | Japonica | NA       |              | Os08g0127900 | OsR498G0815106300.01.T01 | Legumin type B                                                |
| maker-8-augustus-gene-17.15-mRNA-1  | Japonica | NA       |              | Os08g0128200 | OsR498G0815107100.01.T02 | Extracellular ligand-gated ion channel protein                |
| maker-8-augustus-gene-17.17-mRNA-1  | Japonica | NA       |              | Os08g0128500 | OsR498G0815107500.01.T01 | Ribosomal protein L37                                         |
| maker-8-augustus-gene-17.20-mRNA-1  | Japonica | NA       |              |              | OsR498G0815104800.01.T01 | Transcription factor GTE8                                     |
| maker-8-augustus-gene-17.25-mRNA-1  | Japonica | NA       |              | Os08g0127600 | OsR498G0815105400.01.T01 | Chloroplast J-like domain 1                                   |
| maker-8-augustus-gene-17.3-mRNA-1   | Japonica | NA       |              | Os08g0127500 | OsR498G0815105100.01.T01 | Putative membrane protein YuiD                                |
| maker-8-augustus-gene-17.31-mRNA-1  | Japonica | Indica   |              | Os08g0128300 | OsR498G0815107400.01.T02 | Actin-related protein 3 isoform A                             |
| maker-8-augustus-gene-17.7-mRNA-1   | Japonica | NA       |              | Os08g0127700 | OsR498G0815105500.01.T01 | Pre-mRNA-splicing factor SLU7                                 |
| maker-8-augustus-gene-174.0-mRNA-1  | Japonica | NA       |              | Os08g0356500 | OsR498G0815875000.01.T01 |                                                               |
| maker-8-augustus-gene-175.17-mRNA-1 | Japonica | Indica   |              | Os09g0306400 | OsR498G0815877900.01.T01 | BZIP transcription factor                                     |
| maker-8-augustus-gene-175.20-mRNA-1 | Japonica | NA       |              | Os08g0356800 | OsR498G0815877000.01.T01 |                                                               |
| maker-8-augustus-gene-175.21-mRNA-1 | Japonica | NA       |              |              |                          | BFN domain-containing protein (Fragment)                      |
| maker-8-augustus-gene-176.0-mRNA-1  | Japonica | Japonica |              | Os08g0358800 | OsR498G0815882700.01.T01 | Two-component response regulator ORR12                        |
| maker-8-augustus-gene-176.12-mRNA-1 | Japonica | NA       |              | Os08g0359200 | OsR498G0815885000.01.T03 | Lipid phosphate phosphatase 2                                 |
| maker-8-augustus-gene-176.15-mRNA-1 | Japonica | NA       |              | Os08g0359300 | OsR498G0815885200.01.T02 | AB hydrolase-1 domain-containing protein                      |
| maker-8-augustus-gene-176.16-mRNA-1 | Japonica | NA       |              | Os08g0359300 | OsR498G0815885200.01.T02 | AB hydrolase-1 domain-containing protein                      |
| maker-8-augustus-gene-176.3-mRNA-1  | Japonica | NA       |              | Os08g0359000 | OsR498G0815883700.01.T01 | Acclimation of photosynthesis to environment                  |
| maker-8-augustus-gene-176.8-mRNA-1  | Japonica | NA       |              | Os08g0359100 | OsR498G0815884600.01.T02 | Lipid phosphate phosphatase 2                                 |
| maker-8-augustus-gene-177.46-mRNA-1 | Japonica | NA       |              |              | OsR498G0815887900.01.T01 | Protein SAR DEFICIENT 1                                       |
| maker-8-augustus-gene-177.48-mRNA-1 | Japonica | Japonica |              | Os08g0451700 | OsR498G0815890300.01.T01 | AT-rich interactive domain-containing protein 4               |
| maker-8-augustus-gene-177.57-mRNA-1 | Japonica | NA       |              | Os08g0359500 | OsR498G0815886000.01.T01 | CS domain                                                     |
| maker-8-augustus-gene-177.60-mRNA-1 | Japonica | NA       |              | Os08g0359600 | OsR498G0815886400.01.T01 | 30S ribosomal protein S17, chloroplastic                      |
| maker-8-augustus-gene-177.62-mRNA-1 | Japonica | NA       |              | Os08g0360100 | OsR498G0815887400.01.T01 | Chloroplastic group IIA intron splicing facilitator like      |
| maker-8-augustus-gene-178.30-mRNA-1 | Japonica | Japonica |              | Os08g0361300 | OsR498G0407773900.01.T01 | SWIM-type domain-containing protein                           |
| maker-8-augustus-gene-18.0-mRNA-1   | Japonica | NA       |              | Os08g0129700 | OsR498G0815111500.01.T01 | Probable UDP-arabinose 4-epimerase 3                          |
| maker-8-augustus-gene-18.11-mRNA-1  | Japonica | NA       |              | Os08g0131100 | OsR498G0815117900.01.T02 | Flavonoid 3'-monooxygenase                                    |
| maker-8-augustus-gene-18.13-mRNA-1  | Japonica | NA       |              | Os08g0130000 | OsR498G0815112600.01.T02 | Putative magnesium transporter CorA-like family protein-like  |
| maker-8-augustus-gene-18.15-mRNA-1  | Japonica | NA       |              | Os08g0130100 | OsR498G0815112800.01.T01 | zf-LSD1 domain-containing protein (Fragment)                  |
| maker-8-augustus-gene-18.17-mRNA-1  | Japonica | NA       |              | Os08g0130300 | OsR498G0815115800.01.T01 | Tetratricopeptide repeat (TPR)-like superfamily protein       |
| maker-8-augustus-gene-18.22-mRNA-1  | Japonica | NA       |              | Os08g0130400 | OsR498G0815116000.01.T03 | Acyl-activating enzyme 14                                     |
| maker-8-augustus-gene-18.27-mRNA-1  | Japonica | NA       |              | Os08g0130500 | OsR498G0815116200.01.T01 | 60S acidic ribosomal protein P0                               |
| maker-8-augustus-gene-18.33-mRNA-1  | Japonica | NA       |              | Os08g0130600 | OsR498G0815116400.01.T02 | BTB/POZ domain-containing protein At1g30440                   |
| maker-8-augustus-gene-18.5-mRNA-1   | Japonica | NA       |              | Os08g0129900 | OsR498G0815112300.01.T03 | Biogenesis of lysosome-related organelles complex 1 subunit 7 |
| maker-8-augustus-gene-18.8-mRNA-1   | Japonica | NA       |              |              | OsR498G0815117500.01.T01 | Hydroxyproline O-galactosyltransferase                        |
| maker-8-augustus-gene-186.22-mRNA-1 | Japonica | Indica   |              | Os08g0369000 | OsR498G0815926300.01.T02 | Nucleobase-ascorbate transporter 2                            |
| maker-8-augustus-gene-186.28-mRNA-1 | Japonica | NA       |              | Os08g0369200 | OsR498G0815926700.01.T02 | Pentatricopeptide repeat-containing protein mitochondrial     |
| maker-8-augustus-gene-186.31-mRNA-1 | Japonica | NA       |              | Os08g0369400 | OsR498G0815927300.01.T01 | E3 ubiquitin-protein ligase mib1                              |
| maker-8-augustus-gene-186.34-mRNA-1 | Japonica | NA       |              | Os08g0369700 | OsR498G0815927700.01.T02 | Iron-sulfur cluster assembly protein IscA                     |
| maker-8-augustus-gene-186.38-mRNA-1 | Japonica | Indica   |              | Os08g0369300 | OsR498G0815927000.01.T02 | Actin-related protein 2                                       |
| maker-8-augustus-gene-186.46-mRNA-1 | Japonica | NA       |              | Os08g0369600 | OsR498G0815927600.01.T02 | CRC domain-containing protein                                 |
| maker-8-augustus-gene-186.52-mRNA-1 | Japonica | NA       |              |              | OsR498G0815928000.01.T02 | Carotenoid cleavage dioxygenase                               |
| maker-8-augustus-gene-187.1-mRNA-1  | Japonica | Indica   |              | Os08g0371564 | OsR498G0815932400.01.T03 | carotenoid 9,10(9',10')-cleavage dioxygenase 1-like           |
| maker-8-augustus-gene-187.6-mRNA-1  | Japonica | Indica   |              | Os08g0371200 | OsR498G0815932400.01.T01 | Carotenoid cleavage dioxygenase                               |
| maker-8-augustus-gene-188.26-mRNA-1 | Japonica | NA       |              | Os08g0372166 |                          |                                                               |

|                                     |          |          |               |              |                          |                                                                         |
|-------------------------------------|----------|----------|---------------|--------------|--------------------------|-------------------------------------------------------------------------|
| maker-8-augustus-gene-188.28-mRNA-1 | Japonica | NA       |               |              | OsR498G0815934200.01.T01 | Carotenoid cleavage dioxygenase                                         |
| maker-8-augustus-gene-188.33-mRNA-1 | Japonica | NA       |               | Os08g0372900 | OsR498G0815939400.01.T01 |                                                                         |
| maker-8-augustus-gene-189.21-mRNA-1 | Japonica | NA       |               | Os08g0374000 | OsR498G0815943600.01.T01 | Major allergen Api g 2                                                  |
| maker-8-augustus-gene-189.23-mRNA-1 | Japonica | NA       |               | Os08g0374100 | OsR498G0815943800.01.T01 | UBC core domain-containing protein (Fragment)                           |
| maker-8-augustus-gene-19.14-mRNA-1  | Japonica | NA       |               |              |                          | rRNA N-glycosidase                                                      |
| maker-8-augustus-gene-19.6-mRNA-1   | Japonica | NA       |               | Os08g0132600 | OsR498G0815123300.01.T01 | Peptidase A1 domain-containing protein (Fragment)                       |
| maker-8-augustus-gene-191.8-mRNA-1  | Japonica | Indica   |               | Os08g0358800 | OsR498G0815956900.01.T01 | Two-component response regulator ORR12                                  |
| maker-8-augustus-gene-195.7-mRNA-1  | Japonica | NA       |               | Os08g0384900 | OsR498G0815976700.01.T06 | RING-CH-type domain-containing protein                                  |
| maker-8-augustus-gene-2.37-mRNA-1   | Japonica | NA       |               | Os08g0103300 | OsR498G0815031300.01.T05 | Tubby-like F-box protein (Fragment)                                     |
| maker-8-augustus-gene-2.40-mRNA-1   | Japonica | NA       |               | Os08g0102100 | OsR498G0815027200.01.T01 | Nicalin                                                                 |
| maker-8-augustus-gene-2.45-mRNA-1   | Japonica | NA       | Kinase-TM     |              | OsR498G0815030200.01.T02 | Serine/threonine-protein kinase STY46                                   |
| maker-8-augustus-gene-2.53-mRNA-1   | Japonica | NA       |               |              |                          | ACT domain-containing protein                                           |
| maker-8-augustus-gene-2.55-mRNA-1   | Japonica | Japonica |               | Os08g0103400 | OsR498G0815031600.01.T05 | S-acyltransferase                                                       |
| maker-8-augustus-gene-2.59-mRNA-1   | Japonica | NA       |               | Os08g0103500 | OsR498G0815031800.01.T02 | PI-PLC X domain-containing protein isoform A                            |
| maker-8-augustus-gene-20.43-mRNA-1  | Japonica | NA       |               |              | OsR498G0815127300.01.T01 | rRNA N-glycosidase                                                      |
| maker-8-augustus-gene-205.0-mRNA-1  | Japonica | Japonica |               | Os08g0402700 | OsR498G1221669700.01.T01 |                                                                         |
| maker-8-augustus-gene-205.11-mRNA-1 | Japonica | NA       |               | Os08g0402800 | OsR498G0816040000.01.T02 | Auxin-induced protein 5NG4                                              |
| maker-8-augustus-gene-205.2-mRNA-1  | Japonica | NA       |               | Os08g0403300 | OsR498G0816041700.01.T01 | HMA domain-containing protein (Fragment)                                |
| maker-8-augustus-gene-206.0-mRNA-1  | Japonica | NA       |               | Os08g0404000 | OsR498G0816044700.01.T01 | Glycosyltransferase                                                     |
| maker-8-augustus-gene-206.2-mRNA-1  | Japonica | NA       |               |              |                          | Rpma                                                                    |
| maker-8-augustus-gene-207.0-mRNA-1  | Japonica | NA       |               | Os08g0405700 | OsR498G0816052700.01.T01 | Protein SODIUM POTASSIUM ROOT DEFECTIVE 1 isoform A                     |
| maker-8-augustus-gene-207.3-mRNA-1  | Japonica | Indica   |               | Os03g0195800 | OsR498G0816054900.01.T01 | High affinity sulfate transporter                                       |
| maker-8-augustus-gene-207.9-mRNA-1  | Japonica | NA       |               | Os10g0199200 | OsR498G1018346900.01.T03 | Hydroxyproline-rich glycoprotein-like                                   |
| maker-8-augustus-gene-208.0-mRNA-1  | Japonica | NA       |               |              | OsR498G0816057100.01.T02 | TrmE-type G domain-containing protein (Fragment)                        |
| maker-8-augustus-gene-208.11-mRNA-1 | Japonica | NA       |               | Os08g0407600 | OsR498G0816059800.01.T01 | FLZ-type domain-containing protein                                      |
| maker-8-augustus-gene-208.3-mRNA-1  | Japonica | NA       |               | Os08g0407200 | OsR498G0816057700.01.T04 | Metal-dependent hydrolase                                               |
| maker-8-augustus-gene-208.6-mRNA-1  | Japonica | NA       |               | Os08g0408200 | OsR498G0816060900.01.T01 | Putative WD repeat-containing protein                                   |
| maker-8-augustus-gene-209.0-mRNA-1  | Japonica | Indica   |               | Os02g0753000 | OsR498G0816064500.01.T01 | Trehalose-6-phosphate phosphatase J                                     |
| maker-8-augustus-gene-209.3-mRNA-1  | Japonica | NA       |               | Os08g0409900 | OsR498G0816068700.01.T01 | Carbohydrate transporter/ sugar porter/ transporter                     |
| maker-8-augustus-gene-21.34-mRNA-1  | Japonica | NA       |               | Os08g0134900 | OsR498G0815131100.01.T01 |                                                                         |
| maker-8-augustus-gene-21.38-mRNA-1  | Japonica | NA       |               | Os08g0135400 | OsR498G0815132500.01.T01 | E3 ubiquitin-protein like                                               |
| maker-8-augustus-gene-21.47-mRNA-1  | Japonica | NA       |               | Os08g0135100 | OsR498G0815131800.01.T02 | Sugar phosphate transporter domain containing protein                   |
| maker-8-augustus-gene-21.49-mRNA-1  | Japonica | NA       |               |              | OsR498G0815132200.01.T03 | NHL repeat-containing protein 2                                         |
| maker-8-augustus-gene-210.46-mRNA-1 | Japonica | NA       |               |              |                          | S-adenosyl-L-methionine-dependent methyltransferase superfamily protein |
| maker-8-augustus-gene-210.52-mRNA-1 | Japonica | Japonica | CC-LRR-NBS-TM | Os08g0412100 | OsR498G0816076200.01.T01 | Disease resistance protein RPM1                                         |
| maker-8-augustus-gene-211.53-mRNA-1 | Japonica | NA       |               | Os08g0414200 | OsR498G0816080700.01.T01 | RING-type E3 ubiquitin transferase BRCA1                                |
| maker-8-augustus-gene-211.57-mRNA-1 | Japonica | NA       |               |              | OsR498G0714849700.01.T01 | L10-interacting MYB domain-containing protein                           |
| maker-8-augustus-gene-212.53-mRNA-1 | Japonica | NA       |               | Os08g0416000 | OsR498G0816085600.01.T03 | Class I homeodomain-leucine zipper protein 5                            |
| maker-8-augustus-gene-212.62-mRNA-1 | Japonica | NA       |               |              | OsR498G0816087000.01.T06 | RNA-binding protein 25                                                  |
| maker-8-augustus-gene-213.36-mRNA-1 | Japonica | NA       |               | Os08g0416900 | OsR498G0816088900.01.T01 | Protein CHAPERONE-LIKE PROTEIN OF POR1, chloroplastic-like              |
| maker-8-augustus-gene-213.39-mRNA-1 | Japonica | NA       |               |              | OsR498G0816091700.01.T01 |                                                                         |
| maker-8-augustus-gene-213.41-mRNA-1 | Japonica | Japonica |               | Os08g0418600 | OsR498G0816092100.01.T01 |                                                                         |
| maker-8-augustus-gene-213.43-mRNA-1 | Japonica | Japonica |               | Os08g0418600 | OsR498G0816092100.01.T01 |                                                                         |
| maker-8-augustus-gene-213.45-mRNA-1 | Japonica | Japonica |               | Os08g0419000 | OsR498G0816092700.01.T02 |                                                                         |
| maker-8-augustus-gene-213.47-mRNA-1 | Japonica | NA       |               | Os08g0417000 | OsR498G0816089800.01.T01 | Putative 2-oxoglutarate-dependent dioxygenase                           |
| maker-8-augustus-gene-214.11-mRNA-1 | Japonica | NA       |               | Os08g0419600 | OsR498G0816094900.01.T02 |                                                                         |
| maker-8-augustus-gene-214.13-mRNA-1 | Japonica | NA       |               |              | OsR498G0816095300.01.T01 |                                                                         |
| maker-8-augustus-gene-214.17-mRNA-1 | Japonica | NA       |               |              |                          | C2H2-type domain-containing protein                                     |
| maker-8-augustus-gene-214.2-mRNA-1  | Japonica | NA       |               | Os08g0419200 |                          | Flagellar associated protein                                            |
| maker-8-augustus-gene-214.5-mRNA-1  | Japonica | NA       |               |              | OsR498G0816094300.01.T01 |                                                                         |
| maker-8-augustus-gene-214.7-mRNA-1  | Japonica | NA       |               |              | OsR498G0816094500.01.T01 |                                                                         |
| maker-8-augustus-gene-214.9-mRNA-1  | Japonica | NA       |               |              |                          |                                                                         |
| maker-8-augustus-gene-215.41-mRNA-1 | Japonica | NA       |               | Os08g0422000 | OsR498G0816101700.01.T01 | Lycopene cyclase CruP                                                   |
| maker-8-augustus-gene-216.32-mRNA-1 | Japonica | NA       |               | Os08g0423500 | OsR498G0816105900.01.T03 | Bifunctional monodehydroascorbate reductase and carbonic anhydrase nec  |
| maker-8-augustus-gene-216.36-mRNA-1 | Japonica | NA       |               | Os08g0424100 | OsR498G0816108500.01.T01 | Bifunctional monodehydroascorbate reductase and carbonic anhydrase nec  |
| maker-8-augustus-gene-216.38-mRNA-1 | Japonica | NA       |               | Os08g0424500 | OsR498G0816109100.01.T03 | Aminoaldehyde dehydrogenase 1                                           |
| maker-8-augustus-gene-216.44-mRNA-1 | Japonica | NA       |               | Os01g0259900 | OsR498G0816104600.01.T02 | Mediator-associated protein 2                                           |
| maker-8-augustus-gene-216.50-mRNA-1 | Japonica | Indica   |               | Os08g0424200 | OsR498G0816108800.01.T01 | Methylcrotonoyl-CoA carboxylase beta chain mitochondrial                |
| maker-8-augustus-gene-217.34-mRNA-1 | Japonica | NA       |               | Os08g0425000 | OsR498G0816110100.01.T01 | Zinc finger, MYND-type                                                  |
| maker-8-augustus-gene-217.38-mRNA-1 | Japonica | NA       |               | Os08g0425100 | OsR498G0816110300.01.T01 | Dynamin GTPase                                                          |
| maker-8-augustus-gene-217.42-mRNA-1 | Japonica | NA       |               | Os08g0425200 | OsR498G0816110700.01.T01 | chaperonin-like RBCX protein 1, chloroplastic                           |



|                                     |          |          |               |              |                          |                                                                              |
|-------------------------------------|----------|----------|---------------|--------------|--------------------------|------------------------------------------------------------------------------|
| maker-8-augustus-gene-217.44-mRNA-1 | Japonica | NA       |               | Os08g0425700 | OsR498G0816112500.01.T01 | Annexin                                                                      |
| maker-8-augustus-gene-217.48-mRNA-1 | Japonica | NA       |               | Os08g0425800 | OsR498G0816112800.01.T01 | Voltage-dependent L-type calcium channel subunit                             |
| maker-8-augustus-gene-218.38-mRNA-1 | Japonica | NA       |               | Os08g0426866 | OsR498G0816115300.01.T02 | Probable transcription factor RL9                                            |
| maker-8-augustus-gene-218.43-mRNA-1 | Japonica | NA       |               | Os08g0427300 | OsR498G0816115700.01.T04 | Vacuolar fusion protein CC21 homolog B                                       |
| maker-8-augustus-gene-218.48-mRNA-1 | Japonica | NA       |               | Os08g0427500 | OsR498G0816115900.01.T04 | DNA repair protein xp-C / rad4                                               |
| maker-8-augustus-gene-218.54-mRNA-1 | Japonica | NA       |               | Os08g0427700 | OsR498G0816116900.01.T01 |                                                                              |
| maker-8-augustus-gene-218.56-mRNA-1 | Japonica | NA       |               | Os12g0244000 | OsR498G1120216800.01.T06 |                                                                              |
| maker-8-augustus-gene-218.58-mRNA-1 | Japonica | Indica   | Kinase-LRR-TM | Os09g0400500 | OsR498G0816116200.01.T01 | Mitogen-activated protein kinase kinase kinase                               |
| maker-8-augustus-gene-218.61-mRNA-1 | Japonica | Indica   |               | Os08g0427900 | OsR498G0816117600.01.T02 | THO complex subunit 4                                                        |
| maker-8-augustus-gene-219.31-mRNA-1 | Japonica | Indica   |               | Os08g0428100 | OsR498G0816118900.01.T04 | F-box protein SKIP28                                                         |
| maker-8-augustus-gene-219.34-mRNA-1 | Japonica | NA       |               | Os08g0428200 | OsR498G0816119300.01.T02 | Myb factor                                                                   |
| maker-8-augustus-gene-219.38-mRNA-1 | Japonica | NA       |               | Os08g0428400 | OsR498G0816121400.01.T01 | Tify domain-containing protein                                               |
| maker-8-augustus-gene-219.43-mRNA-1 | Japonica | NA       |               | Os08g0428800 | OsR498G0816124800.01.T01 | H15 domain-containing protein                                                |
| maker-8-augustus-gene-219.45-mRNA-1 | Japonica | NA       |               | Os08g0428900 | OsR498G0816126000.01.T01 | 1-phosphatidylinositol-3-phosphate 5-kinase                                  |
| maker-8-augustus-gene-22.0-mRNA-1   | Japonica | Japonica |               | Os08g0136800 | OsR498G0815134800.01.T01 | Cysteine-rich repeat secretory protein 55                                    |
| maker-8-augustus-gene-22.12-mRNA-1  | Japonica | Indica   |               | Os08g0137100 | OsR498G0815136100.01.T01 | Polycomb group protein FIE1                                                  |
| maker-8-augustus-gene-22.15-mRNA-1  | Japonica | NA       |               | Os08g0137300 | OsR498G0815136700.01.T02 | Putative DUF604-domain containing/glycosyltransferase-related family protein |
| maker-8-augustus-gene-22.17-mRNA-1  | Japonica | NA       |               | Os08g0137400 | OsR498G0815136900.01.T01 | Phytoecyanin domain-containing protein (Fragment)                            |
| maker-8-augustus-gene-22.19-mRNA-1  | Japonica | NA       |               | Os08g0137800 | OsR498G0815137300.01.T01 | Phytoecyanin domain-containing protein (Fragment)                            |
| maker-8-augustus-gene-22.2-mRNA-1   | Japonica | NA       |               | Os08g0137100 | OsR498G0815135500.01.T01 | polycomb group protein FERTILIZATION-INDEPENDENT ENDOSPERM                   |
| maker-8-augustus-gene-22.21-mRNA-1  | Japonica | NA       |               | Os08g0136300 | OsR498G0815134400.01.T01 | Cysteine-rich repeat secretory protein 55                                    |
| maker-8-augustus-gene-22.23-mRNA-1  | Japonica | NA       |               | Os08g0136500 | OsR498G0815134600.01.T01 | Cysteine-rich repeat secretory protein 55                                    |
| maker-8-augustus-gene-22.25-mRNA-1  | Japonica | NA       |               | Os08g0136700 | OsR498G0815134800.01.T01 | Cysteine-rich repeat secretory protein 55                                    |
| maker-8-augustus-gene-22.7-mRNA-1   | Japonica | NA       |               | Os08g0137200 | OsR498G0815135700.01.T01 | Actin-related protein 4 isoform A                                            |
| maker-8-augustus-gene-220.0-mRNA-1  | Japonica | NA       |               |              | OsR498G0305881800.01.T01 | Putative far-red impaired response protein                                   |
| maker-8-augustus-gene-220.11-mRNA-1 | Japonica | Indica   |               | Os09g0403300 | OsR498G0816132000.01.T01 | Cytokinin hydroxylase                                                        |
| maker-8-augustus-gene-220.3-mRNA-1  | Japonica | NA       |               | Os08g0429250 | OsR498G0816128800.01.T01 | Spore coat protein A                                                         |
| maker-8-augustus-gene-220.6-mRNA-1  | Japonica | NA       |               | Os08g0514300 |                          |                                                                              |
| maker-8-augustus-gene-221.0-mRNA-1  | Japonica | NA       |               | Os08g0430100 | OsR498G0816133300.01.T01 |                                                                              |
| maker-8-augustus-gene-221.11-mRNA-1 | Japonica | NA       |               | Os08g0431200 | OsR498G0816137900.01.T02 | Formin-like protein 9                                                        |
| maker-8-augustus-gene-221.14-mRNA-1 | Japonica | Japonica |               | Os08g0430000 | OsR498G0816132600.01.T01 | Dentin sialophosphoprotein                                                   |
| maker-8-augustus-gene-221.2-mRNA-1  | Japonica | NA       |               | Os08g0430200 | OsR498G0816133900.01.T03 | Ubiquitin receptor RAD23                                                     |
| maker-8-augustus-gene-221.20-mRNA-1 | Japonica | NA       |               |              |                          |                                                                              |
| maker-8-augustus-gene-221.25-mRNA-1 | Japonica | NA       |               | Os08g0430500 | OsR498G0816135200.01.T01 | 14-3-3 protein a                                                             |
| maker-8-augustus-gene-221.28-mRNA-1 | Japonica | NA       |               | Os08g0430600 | OsR498G0816135600.01.T04 | Cyanobacterial aminoacyl-tRNA synthetase, CAAD domain containing protein     |
| maker-8-augustus-gene-221.31-mRNA-1 | Japonica | NA       |               | Os08g0430700 | OsR498G0816135800.01.T01 | Ultraviolet-B receptor like                                                  |
| maker-8-augustus-gene-221.36-mRNA-1 | Japonica | NA       |               | Os08g0431300 | OsR498G0816138200.01.T02 | Dihydrolipoamide acetyltransferase component of pyruvate dehydrogenase       |
| maker-8-augustus-gene-221.9-mRNA-1  | Japonica | Indica   |               | Os09g0408500 | OsR498G0816137700.01.T01 | Heavy metal-associated isoprenylated plant protein 7                         |
| maker-8-augustus-gene-227.0-mRNA-1  | Japonica | NA       |               | Os08g0439100 | OsR498G0816168300.01.T02 | START domain                                                                 |
| maker-8-augustus-gene-228.38-mRNA-1 | Japonica | NA       |               | Os08g0441400 | OsR498G0816180100.01.T02 | Cytochrome c oxidase, subunit Vlb                                            |
| maker-8-augustus-gene-228.40-mRNA-1 | Japonica | NA       |               | Os08g0441600 | OsR498G0816182700.01.T01 | Chorismate mutase                                                            |
| maker-8-augustus-gene-228.52-mRNA-1 | Japonica | NA       |               | Os08g0441500 | OsR498G0816180400.01.T01 | Cinnamoyl CoA reductase                                                      |
| maker-8-augustus-gene-228.59-mRNA-1 | Japonica | NA       |               | Os08g0442000 | OsR498G0816183400.01.T03 | QWRF motif-containing protein 2                                              |
| maker-8-augustus-gene-229.39-mRNA-1 | Japonica | NA       |               | Os08g0442300 | OsR498G0816183900.01.T01 | Calcineurin subunit B like                                                   |
| maker-8-augustus-gene-229.43-mRNA-1 | Japonica | NA       |               | Os08g0442350 | OsR498G0816183900.01.T05 | Myosin-binding protein 7                                                     |
| maker-8-augustus-gene-229.45-mRNA-1 | Japonica | NA       |               | Os08g0442400 | OsR498G0816184900.01.T01 | Ethylene-responsive transcription factor WRI1                                |
| maker-8-augustus-gene-229.48-mRNA-1 | Japonica | NA       |               |              |                          | histone-lysine N-methyltransferase ASHR3                                     |
| maker-8-augustus-gene-229.51-mRNA-1 | Japonica | NA       |               | Os08g0442200 | OsR498G0816183800.01.T01 | Strictosidine synthase 1                                                     |
| maker-8-augustus-gene-229.54-mRNA-1 | Japonica | NA       | Kinase-LRR-TM | Os08g0442700 | OsR498G0816185600.01.T01 | Serine/threonine protein kinase                                              |
| maker-8-augustus-gene-23.40-mRNA-1  | Japonica | NA       |               | Os08g0138400 | OsR498G0815138700.01.T01 | Phytoecyanin domain-containing protein (Fragment)                            |
| maker-8-augustus-gene-23.42-mRNA-1  | Japonica | NA       |               | Os08g0138500 | OsR498G0815139000.01.T01 | Transcription factor ILR3                                                    |
| maker-8-augustus-gene-23.45-mRNA-1  | Japonica | NA       | Kinase-TM     |              | OsR498G0815139400.01.T02 | Calcium/calmodulin-regulated receptor-like protein kinase 1                  |
| maker-8-augustus-gene-23.49-mRNA-1  | Japonica | NA       |               | Os08g0138900 | OsR498G0815140000.01.T01 |                                                                              |
| maker-8-augustus-gene-23.51-mRNA-1  | Japonica | NA       |               | Os08g0139000 | OsR498G0815140200.01.T02 | Glycine-rich RNA-binding protein 4 mitochondrial                             |
| maker-8-augustus-gene-23.54-mRNA-1  | Japonica | NA       |               | Os08g0139100 | OsR498G0815140400.01.T03 | Multiple organellar RNA editing factor                                       |
| maker-8-augustus-gene-23.57-mRNA-1  | Japonica | NA       |               | Os08g0139200 | OsR498G0815140600.01.T01 | NAD(P)H dehydrogenase (quinone)                                              |
| maker-8-augustus-gene-23.60-mRNA-1  | Japonica | Japonica |               | Os06g0696900 | OsR498G0815141800.01.T01 | Macro domain-containing protein (Fragment)                                   |
| maker-8-augustus-gene-23.62-mRNA-1  | Japonica | NA       |               |              | OsR498G0815142800.01.T01 | Germacrene D synthase                                                        |
| maker-8-augustus-gene-232.51-mRNA-1 | Japonica | NA       |               | Os08g0447900 | OsR498G0816205500.01.T02 | Adenylyl cyclase-associated protein                                          |
| maker-8-augustus-gene-232.62-mRNA-1 | Japonica | NA       |               | Os08g0448000 | OsR498G0816205800.01.T02 | 4-coumarate--CoA ligase                                                      |
| maker-8-augustus-gene-233.30-mRNA-1 | Japonica | NA       |               |              | OsR498G0816216300.01.T02 | 1-phosphatidylinositol-3-phosphate 5-kinase                                  |

|                                     |          |          |        |              |                          |                                                                        |
|-------------------------------------|----------|----------|--------|--------------|--------------------------|------------------------------------------------------------------------|
| maker-8-augustus-gene-233.35-mRNA-1 | Japonica | NA       |        | Os08g0451000 | OsR498G0816217100.01.T03 | Component of oligomeric Golgi complex 3                                |
| maker-8-augustus-gene-233.41-mRNA-1 | Japonica | NA       |        |              | OsR498G0816218100.01.T01 | Histone-lysine N-methyltransferase ATX5 (Fragment)                     |
| maker-8-augustus-gene-233.43-mRNA-1 | Japonica | NA       |        | Os08g0451400 | OsR498G0816218600.01.T06 | AT-rich interactive domain-containing protein 4                        |
| maker-8-augustus-gene-233.48-mRNA-1 | Japonica | NA       |        |              | OsR498G0816219000.01.T02 | ARID domain-containing protein                                         |
| maker-8-augustus-gene-233.53-mRNA-1 | Japonica | NA       |        |              |                          | ARID domain-containing protein                                         |
| maker-8-augustus-gene-234.0-mRNA-1  | Japonica | Japonica |        | Os08g0451800 | OsR498G0816220100.01.T01 | Putative E3 ubiquitin-protein ligase ARI9                              |
| maker-8-augustus-gene-234.2-mRNA-1  | Japonica | NA       |        | Os08g0452500 | OsR498G0816222500.01.T01 | SAUR33-auxin-responsive SAUR family member                             |
| maker-8-augustus-gene-234.3-mRNA-1  | Japonica | NA       |        |              | OsR498G0816223900.01.T06 | Knob associated heat shock protein 40                                  |
| maker-8-augustus-gene-235.0-mRNA-1  | Japonica | Indica   |        | Os09g0437500 | OsR498G0816226700.01.T01 | Dormancy-associated 3                                                  |
| maker-8-augustus-gene-235.11-mRNA-1 | Japonica | NA       | Kinase |              | OsR498G0816229000.01.T01 | Cyclin-dependent kinase C-3                                            |
| maker-8-augustus-gene-235.19-mRNA-1 | Japonica | Japonica |        | Os08g0454500 | OsR498G0816230800.01.T01 | Orcinol O-methyltransferase                                            |
| maker-8-augustus-gene-235.2-mRNA-1  | Japonica | NA       |        | Os08g0453700 | OsR498G0816228700.01.T01 | Respiratory burst oxidase E                                            |
| maker-8-augustus-gene-235.21-mRNA-1 | Japonica | NA       |        |              | OsR498G0816229000.01.T01 | Transposon protein, putative, CACTA, En/Spm sub-class                  |
| maker-8-augustus-gene-236.2-mRNA-1  | Japonica | NA       |        |              | OsR498G0611768000.01.T01 |                                                                        |
| maker-8-augustus-gene-237.0-mRNA-1  | Japonica | NA       |        | Os08g0457600 | OsR498G0816240500.01.T01 | GTP diphosphokinase                                                    |
| maker-8-augustus-gene-237.5-mRNA-1  | Japonica | NA       |        |              | OsR498G0816242100.01.T01 | Methylmalonyl-CoA mutase                                               |
| maker-8-augustus-gene-237.7-mRNA-1  | Japonica | NA       |        | Os08g0458200 | OsR498G0816242700.01.T01 |                                                                        |
| maker-8-augustus-gene-237.9-mRNA-1  | Japonica | NA       | Kinase | Os08g0457400 | OsR498G0816238400.01.T01 | Serine/threonine-protein kinase RPK                                    |
| maker-8-augustus-gene-238.42-mRNA-1 | Japonica | NA       |        | Os08g0459600 | OsR498G0816247500.01.T01 | 12-oxo-phytyldienoic acid reductase                                    |
| maker-8-augustus-gene-238.46-mRNA-1 | Japonica | NA       |        | Os08g0458600 | OsR498G0816244400.01.T01 | Response regulatory domain-containing protein                          |
| maker-8-augustus-gene-238.48-mRNA-1 | Japonica | NA       |        | Os08g0459100 | OsR498G0816246400.01.T01 | DNA repair protein rhp7                                                |
| maker-8-augustus-gene-239.0-mRNA-1  | Japonica | NA       |        |              | OsR498G0816251800.01.T01 | Cytokinin dehydrogenase                                                |
| maker-8-augustus-gene-239.12-mRNA-1 | Japonica | Japonica |        | Os08g0460900 | OsR498G0816254600.01.T02 | F-box domain-containing protein (Fragment)                             |
| maker-8-augustus-gene-239.14-mRNA-1 | Japonica | Japonica |        | Os08g0461000 | OsR498G0816253400.01.T03 | FBD domain-containing protein (Fragment)                               |
| maker-8-augustus-gene-239.15-mRNA-1 | Japonica | Japonica |        | Os08g0461100 | OsR498G0816253600.01.T01 | F-box domain-containing protein (Fragment)                             |
| maker-8-augustus-gene-239.21-mRNA-1 | Japonica | Indica   |        | Os08g0461300 | OsR498G0816254600.01.T02 | F-box domain-containing protein (Fragment)                             |
| maker-8-augustus-gene-239.24-mRNA-1 | Japonica | Japonica |        | Os08g0461400 | OsR498G0816254800.01.T01 | F-box domain-containing protein                                        |
| maker-8-augustus-gene-239.26-mRNA-1 | Japonica | NA       |        | Os08g0461700 | OsR498G0816255200.01.T04 | FBD domain-containing protein (Fragment)                               |
| maker-8-augustus-gene-239.3-mRNA-1  | Japonica | Indica   |        | Os08g0460700 | OsR498G0816252400.01.T01 | F-box domain-containing protein                                        |
| maker-8-augustus-gene-239.31-mRNA-1 | Japonica | Indica   |        | Os08g0461800 | OsR498G0816255600.01.T03 | F-box domain-containing protein                                        |
| maker-8-augustus-gene-239.34-mRNA-1 | Japonica | NA       |        | Os03g0615700 | OsR498G0613178300.01.T01 | GRF zinc finger family protein, expressed                              |
| maker-8-augustus-gene-239.6-mRNA-1  | Japonica | Indica   |        | Os08g0461100 | OsR498G0816252800.01.T02 | F-box domain-containing protein (Fragment)                             |
| maker-8-augustus-gene-24.10-mRNA-1  | Japonica | Indica   |        | Os05g0331200 | OsR498G0815148400.01.T01 |                                                                        |
| maker-8-augustus-gene-24.2-mRNA-1   | Japonica | NA       |        |              |                          | Vesicle-associated protein 4-2                                         |
| maker-8-augustus-gene-24.5-mRNA-1   | Japonica | Indica   |        | Os08g0140700 | OsR498G0815146600.01.T01 |                                                                        |
| maker-8-augustus-gene-240.0-mRNA-1  | Japonica | NA       |        | Os08g0462700 | OsR498G0816257100.01.T01 | BREVIS RADIX transcription factor                                      |
| maker-8-augustus-gene-240.10-mRNA-1 | Japonica | NA       |        | Os08g0464000 | OsR498G0816260000.01.T01 | Activator heat shock protein ATPase                                    |
| maker-8-augustus-gene-240.3-mRNA-1  | Japonica | NA       |        | Os08g0463900 | OsR498G0816259500.01.T02 | Protein EMBRYO SAC DEVELOPMENT ARREST 3 chloroplastic                  |
| maker-8-augustus-gene-240.7-mRNA-1  | Japonica | NA       |        | Os08g0462300 | OsR498G0816256800.01.T01 | F-box domain-containing protein                                        |
| maker-8-augustus-gene-240.9-mRNA-1  | Japonica | NA       |        | Os08g0462900 | OsR498G0816257600.01.T01 | transmembrane protein 45A                                              |
| maker-8-augustus-gene-241.0-mRNA-1  | Japonica | NA       |        |              | OsR498G0816262400.01.T03 | Homeobox-leucine zipper protein HOX11                                  |
| maker-8-augustus-gene-241.4-mRNA-1  | Japonica | NA       |        | Os08g0465800 | OsR498G0816265000.01.T02 | Glutamate decarboxylase                                                |
| maker-8-augustus-gene-242.0-mRNA-1  | Japonica | NA       |        | Os05g0160800 | OsR498G0509792300.01.T01 | DNA polymerase epsilon subunit B                                       |
| maker-8-augustus-gene-242.11-mRNA-1 | Japonica | NA       |        |              | OsR498G0816266400.01.T01 |                                                                        |
| maker-8-augustus-gene-242.13-mRNA-1 | Japonica | NA       |        | Os08g0467400 | OsR498G0816272000.01.T05 | IAA-alanine resistance protein 1                                       |
| maker-8-augustus-gene-242.7-mRNA-1  | Japonica | Indica   |        | Os08g0467500 | OsR498G0816272100.01.T03 |                                                                        |
| maker-8-augustus-gene-243.0-mRNA-1  | Japonica | NA       |        | Os08g0468100 | OsR498G0816274900.01.T01 | Nitrate reductase                                                      |
| maker-8-augustus-gene-243.11-mRNA-1 | Japonica | Indica   |        | Os09g0454300 | OsR498G0816279200.01.T01 | F-box/RNI-like superfamily protein isoform 1                           |
| maker-8-augustus-gene-243.3-mRNA-1  | Japonica | Indica   |        | Os08g0468400 | OsR498G0816275500.01.T01 | Kinetochore protein NDC                                                |
| maker-8-augustus-gene-243.6-mRNA-1  | Japonica | NA       |        | Os08g0469700 | OsR498G0816279900.01.T03 | Phosphatidylinositol 4-phosphate 5-kinase                              |
| maker-8-augustus-gene-244.32-mRNA-1 | Japonica | Indica   |        | Os08g0423500 | OsR498G0816282000.01.T01 | Bifunctional monodehydroascorbate reductase and carbonic anhydrase nec |
| maker-8-augustus-gene-244.34-mRNA-1 | Japonica | Indica   |        | Os08g0470700 | OsR498G0816284600.01.T01 | Alpha carbonic anhydrase                                               |
| maker-8-augustus-gene-244.37-mRNA-1 | Japonica | Indica   |        | Os09g0455200 | OsR498G0816285600.01.T01 | Heat shock transcription factor                                        |
| maker-8-augustus-gene-245.25-mRNA-1 | Japonica | NA       |        | Os08g0471800 | OsR498G0816288300.01.T04 |                                                                        |
| maker-8-augustus-gene-245.33-mRNA-1 | Japonica | NA       |        | Os08g0472600 | OsR498G0816291500.01.T01 | Glycoprotein 3-alpha-L-fucosyltransferase A                            |
| maker-8-augustus-gene-245.39-mRNA-1 | Japonica | NA       |        | Os08g0471900 | OsR498G0816288800.01.T01 | Zinc finger protein ZPR1                                               |
| maker-8-augustus-gene-246.3-mRNA-1  | Japonica | NA       |        | Os08g0473600 | OsR498G0816294500.01.T01 | Alpha-amylase isozyme 3C                                               |
| maker-8-augustus-gene-246.5-mRNA-1  | Japonica | NA       |        | Os08g0473900 | OsR498G0816295500.01.T01 | Alpha-amylase isozyme 3B                                               |
| maker-8-augustus-gene-246.7-mRNA-1  | Japonica | NA       |        | Os08g0474100 | OsR498G0816297500.01.T01 |                                                                        |
| maker-8-augustus-gene-246.8-mRNA-1  | Japonica | NA       |        | Os08g0472800 | OsR498G0816292400.01.T01 | Absciscic acid 8'-hydroxylase                                          |
| maker-8-augustus-gene-247.52-mRNA-1 | Japonica | NA       |        |              | OsR498G0816301700.01.T06 | Ternary complex factor MIP1, leucine-zipper                            |

|                                     |          |          |               |              |                          |                                                                            |
|-------------------------------------|----------|----------|---------------|--------------|--------------------------|----------------------------------------------------------------------------|
| maker-8-augustus-gene-247.57-mRNA-1 | Japonica | Japonica |               | Os08g0476100 | OsR498G0917631500.01.T03 | Putative ternary complex factor MIP1, leucine-zipper                       |
| maker-8-augustus-gene-247.59-mRNA-1 | Japonica | NA       |               | Os08g0476300 | OsR498G0816303100.01.T02 | Carbonyl reductase family member 4-like                                    |
| maker-8-augustus-gene-247.61-mRNA-1 | Japonica | NA       |               |              |                          | Tuliposide A-converting enzyme 2, chloroplastic                            |
| maker-8-augustus-gene-247.63-mRNA-1 | Japonica | NA       |               |              | OsR498G0816303400.01.T01 | Metal-independent phosphoserine phosphatase                                |
| maker-8-augustus-gene-248.43-mRNA-1 | Japonica | Indica   |               | Os08g0477800 | OsR498G0816307900.01.T02 | PWWP domain-containing protein                                             |
| maker-8-augustus-gene-248.50-mRNA-1 | Japonica | NA       |               | Os08g0477900 | OsR498G0816308300.01.T01 | BHLH domain-containing protein (Fragment)                                  |
| maker-8-augustus-gene-248.52-mRNA-1 | Japonica | NA       |               | Os08g0476900 | OsR498G0816305600.01.T01 | Patatin group A-3                                                          |
| maker-8-augustus-gene-248.54-mRNA-1 | Japonica | NA       |               | Os08g0477100 | OsR498G0816306000.01.T01 | Patatin group A-3                                                          |
| maker-8-augustus-gene-248.56-mRNA-1 | Japonica | Indica   |               | Os03g0393900 | OsR498G0816307000.01.T03 | Patatin                                                                    |
| maker-8-augustus-gene-248.61-mRNA-1 | Japonica | NA       |               | Os08g0477600 | OsR498G0816307200.01.T02 | Sodium channel modifier 1                                                  |
| maker-8-augustus-gene-248.65-mRNA-1 | Japonica | NA       |               | Os08g0478100 | OsR498G0816309000.01.T04 | IMPACT family member in pol 5' region                                      |
| maker-8-augustus-gene-248.69-mRNA-1 | Japonica | NA       |               |              |                          | ATP synthase subunit d, mitochondrial                                      |
| maker-8-augustus-gene-249.32-mRNA-1 | Japonica | NA       |               | Os08g0479300 | OsR498G0816314700.01.T01 | D-type cyclin                                                              |
| maker-8-augustus-gene-249.36-mRNA-1 | Japonica | NA       |               | Os08g0478500 | OsR498G0816310400.01.T01 | Ubiquitin carboxyl-terminal hydrolase 17                                   |
| maker-8-augustus-gene-249.42-mRNA-1 | Japonica | NA       |               | Os08g0478800 | OsR498G0816313600.01.T05 | Glucose-6-phosphate isomerase                                              |
| maker-8-augustus-gene-25.38-mRNA-1  | Japonica | NA       |               | Os08g0143300 | OsR498G0815151700.01.T01 | 4-coumarate--CoA ligase-like 6                                             |
| maker-8-augustus-gene-25.40-mRNA-1  | Japonica | NA       |               | Os08g0143500 | OsR498G0815152100.01.T01 | Beta-glucuronosyltransferase GlcAT14B                                      |
| maker-8-augustus-gene-25.47-mRNA-1  | Japonica | NA       |               | Os08g0143400 | OsR498G0815152000.01.T01 | SWIRM domain-containing protein (Fragment)                                 |
| maker-8-augustus-gene-25.49-mRNA-1  | Japonica | NA       |               | Os08g0143700 | OsR498G0815153200.01.T01 | DUF676 domain-containing protein (Fragment)                                |
| maker-8-augustus-gene-253.28-mRNA-1 | Japonica | NA       |               | Os08g0487000 | OsR498G0816347700.01.T01 |                                                                            |
| maker-8-augustus-gene-255.35-mRNA-1 | Japonica | NA       |               | Os09g0291000 |                          | PttA/En/Spm family plant transposase                                       |
| maker-8-augustus-gene-259.41-mRNA-1 | Japonica | NA       |               | Os08g0497600 | OsR498G0816389500.01.T01 | Putative WD repeat-containing protein C2A9.03 isoform B                    |
| maker-8-augustus-gene-260.33-mRNA-1 | Japonica | NA       | Kinase-TM     | Os08g0501500 | OsR498G0816405000.01.T01 | Wall-associated receptor kinase 1                                          |
| maker-8-augustus-gene-261.0-mRNA-1  | Japonica | Japonica | Kinase-TM     | Os08g0501600 | OsR498G0816405300.01.T01 | Wall associated kinase                                                     |
| maker-8-augustus-gene-261.6-mRNA-1  | Japonica | NA       |               | Os08g0502800 | OsR498G0816410700.01.T01 | Upstream activation factor subunit spp27 like                              |
| maker-8-augustus-gene-262.5-mRNA-1  | Japonica | NA       |               | Os08g0504600 | OsR498G0816418500.01.T02 | RRM domain-containing protein                                              |
| maker-8-augustus-gene-262.9-mRNA-1  | Japonica | NA       |               | Os08g0504400 | OsR498G0816418200.01.T03 | Putative pigment biosynthesis protein                                      |
| maker-8-augustus-gene-263.34-mRNA-1 | Japonica | NA       |               | Os08g0505200 | OsR498G0816422700.01.T05 | Dilute domain-containing protein                                           |
| maker-8-augustus-gene-263.37-mRNA-1 | Japonica | NA       |               | Os08g0506000 | OsR498G0816425700.01.T03 | OTU domain-containing protein                                              |
| maker-8-augustus-gene-263.40-mRNA-1 | Japonica | Indica   | Kinase-LRR-TM | Os08g0506400 | OsR498G0816427500.01.T03 | Receptor protein kinase-like protein ZAR1                                  |
| maker-8-augustus-gene-263.42-mRNA-1 | Japonica | Indica   |               | Os06g0319700 | OsR498G0816423000.01.T01 | 60S ribosomal protein L31                                                  |
| maker-8-augustus-gene-263.44-mRNA-1 | Japonica | Japonica |               | Os08g0506500 | OsR498G0816427800.01.T03 | 23S rRNA methyltransferase, putative                                       |
| maker-8-augustus-gene-263.47-mRNA-1 | Japonica | NA       |               |              |                          | Transposable element protein, putative, MuDR                               |
| maker-8-augustus-gene-264.35-mRNA-1 | Japonica | NA       |               | Os08g0506700 | OsR498G0816428500.01.T01 | Transcription factor bHLH130                                               |
| maker-8-augustus-gene-265.32-mRNA-1 | Japonica | NA       |               | Os08g0508600 | OsR498G0816438900.01.T01 | Pre-rRNA-processing protein TSR2 like                                      |
| maker-8-augustus-gene-265.35-mRNA-1 | Japonica | Japonica |               | Os08g0509100 | OsR498G0816440900.01.T02 | Lipoxygenase 7, chloroplastic                                              |
| maker-8-augustus-gene-265.37-mRNA-1 | Japonica | Japonica |               | Os08g0509500 | OsR498G0816442300.01.T03 | G patch domain-containing protein 11                                       |
| maker-8-augustus-gene-265.39-mRNA-1 | Japonica | Japonica |               | Os08g0508500 | OsR498G0917724200.01.T05 | JmjC domain-containing protein (Fragment)                                  |
| maker-8-augustus-gene-265.41-mRNA-1 | Japonica | Japonica |               | Os08g0508800 | OsR498G0816440900.01.T02 | Lipoxygenase 7, chloroplastic                                              |
| maker-8-augustus-gene-265.43-mRNA-1 | Japonica | Japonica |               | Os08g0509200 | OsR498G0816441200.01.T01 | Beta-glucosidase 30                                                        |
| maker-8-augustus-gene-265.46-mRNA-1 | Japonica | Japonica |               | Os08g0509400 | OsR498G0917725800.01.T01 | Beta-glucosidase 30                                                        |
| maker-8-augustus-gene-265.48-mRNA-1 | Japonica | NA       |               | Os08g0509600 | OsR498G0816442600.01.T01 | Squamosa promoter-binding-like protein 14                                  |
| maker-8-augustus-gene-266.41-mRNA-1 | Japonica | NA       |               | Os08g0510300 | OsR498G0816445100.01.T01 | Potassium transporter                                                      |
| maker-8-augustus-gene-266.44-mRNA-1 | Japonica | NA       |               | Os08g0510500 |                          | ENT domain-containing protein                                              |
| maker-8-augustus-gene-266.47-mRNA-1 | Japonica | Japonica |               | Os08g0510900 | OsR498G0816446700.01.T01 | ENT domain-containing protein                                              |
| maker-8-augustus-gene-266.50-mRNA-1 | Japonica | Japonica |               | Os08g0510400 | OsR498G0816445400.01.T03 | 3-oxoacyl-[acyl-carrier-protein] reductase FabG                            |
| maker-8-augustus-gene-266.55-mRNA-1 | Japonica | Japonica |               | Os08g0510700 | OsR498G0816445800.01.T04 | Bromo domain-containing protein                                            |
| maker-8-augustus-gene-266.57-mRNA-1 | Japonica | NA       |               | Os08g0511200 | OsR498G0816447200.01.T01 | CUP-SHAPED COTYLEDON 3                                                     |
| maker-8-augustus-gene-267.0-mRNA-1  | Japonica | NA       |               |              | OsR498G0816450700.01.T01 | Serine/threonine-protein kinase pakG                                       |
| maker-8-augustus-gene-267.13-mRNA-1 | Japonica | NA       | Kinase-TM     | Os08g0512600 | OsR498G0816453300.01.T01 | Cyclin-dependent kinase B                                                  |
| maker-8-augustus-gene-267.16-mRNA-1 | Japonica | Japonica |               | Os08g0512700 | OsR498G0816454300.01.T01 | 3-hydroxy-3-methylglutaryl coenzyme A reductase                            |
| maker-8-augustus-gene-267.19-mRNA-1 | Japonica | Japonica |               | Os08g0512900 | OsR498G0816454500.01.T01 | Dethiobiotin synthetase                                                    |
| maker-8-augustus-gene-267.2-mRNA-1  | Japonica | NA       |               |              | OsR498G0816451100.01.T01 | HMA domain-containing protein (Fragment)                                   |
| maker-8-augustus-gene-267.21-mRNA-1 | Japonica | NA       |               |              |                          | Serine/threonine-protein phosphatase                                       |
| maker-8-augustus-gene-267.27-mRNA-1 | Japonica | NA       |               | Os08g0513600 |                          | Proton pump-interactor 1                                                   |
| maker-8-augustus-gene-267.30-mRNA-1 | Japonica | NA       | LRR-TM        |              | OsR498G0816450000.01.T02 | Plant intracellular Ras-group-related LRR protein 4                        |
| maker-8-augustus-gene-267.32-mRNA-1 | Japonica | NA       |               | Os08g0511800 | OsR498G0816450400.01.T01 | Midasin like                                                               |
| maker-8-augustus-gene-267.34-mRNA-1 | Japonica | NA       |               |              |                          | N-acyl-L-amino-acid amidohydrolase                                         |
| maker-8-augustus-gene-267.4-mRNA-1  | Japonica | Japonica |               | Os08g0512300 | OsR498G0816451300.01.T01 | Geranylgeranyl transferase type-2 subunit beta                             |
| maker-8-augustus-gene-267.9-mRNA-1  | Japonica | NA       |               | Os08g0512500 | OsR498G0816453100.01.T01 | PsbP domain-containing protein 3 chloroplastic                             |
| maker-8-augustus-gene-268.33-mRNA-1 | Japonica | NA       |               |              |                          | Squamosa promoter-binding protein-like (SBP domain) transcription factor f |

|                                      |          |          |               |              |                          |                                                                        |
|--------------------------------------|----------|----------|---------------|--------------|--------------------------|------------------------------------------------------------------------|
| maker-8-augustus-gene-268.36-mRNA-1  | Japonica | Japonica | Kinase-TM     | Os08g0514000 | OsR498G0816459900.01.T01 | L-type lectin-domain containing receptor kinase IV.2                   |
| maker-8-augustus-gene-268.38-mRNA-1  | Japonica | Indica   | Kinase-TM     | Os06g0328400 | OsR498G0816460300.01.T01 | Mitogen-activated protein kinase kinase kinase                         |
| maker-8-augustus-gene-269.35-mRNA-1  | Japonica | Japonica |               | Os08g0515700 | OsR498G0917737700.01.T01 | DUF547 domain-containing protein (Fragment)                            |
| maker-8-augustus-gene-269.37-mRNA-1  | Japonica | NA       |               |              |                          | BTB domain-containing protein                                          |
| maker-8-augustus-gene-269.39-mRNA-1  | Japonica | Japonica |               | Os08g0516900 | OsR498G0816465500.01.T01 | KID-containing protein                                                 |
| maker-8-augustus-gene-269.41-mRNA-1  | Japonica | NA       |               | Os08g0516000 |                          | UVR domain                                                             |
| maker-8-augustus-gene-269.44-mRNA-1  | Japonica | NA       |               |              |                          | Calcium-transporting ATPase                                            |
| maker-8-augustus-gene-269.47-mRNA-1  | Japonica | NA       |               |              | OsR498G0816466200.01.T06 | Calcium-transporting ATPase                                            |
| maker-8-augustus-gene-270.0-mRNA-1   | Japonica | Japonica |               | Os08g0517700 | OsR498G0816468300.01.T03 | Oxysterol-binding protein-related protein 4C-like isoform X2           |
| maker-8-augustus-gene-270.11-mRNA-1  | Japonica | Japonica |               | Os08g0517300 | OsR498G0816466800.01.T04 | Serrate RNA effector molecule                                          |
| maker-8-augustus-gene-270.15-mRNA-1  | Japonica | Japonica |               | Os08g0517500 | OsR498G0202973500.01.T01 | FMN-binding split barrel                                               |
| maker-8-augustus-gene-270.23-mRNA-1  | Japonica | Indica   |               | Os10g0146200 | OsR498G0816468600.01.T01 | Pathogenesis-related protein 5                                         |
| maker-8-augustus-gene-270.25-mRNA-1  | Japonica | NA       |               | Os08g0517900 | OsR498G0816468800.01.T01 | 30S ribosomal protein like                                             |
| maker-8-augustus-gene-271.31-mRNA-1  | Japonica | NA       |               |              | OsR498G0816477500.01.T01 | DUF632 domain-containing protein                                       |
| maker-8-augustus-gene-271.45-mRNA-1  | Japonica | Japonica |               | Os08g0520000 | OsR498G0917743900.01.T01 | probable mitochondrial adenine nucleotide transporter BTL1             |
| maker-8-augustus-gene-271.47-mRNA-1  | Japonica | NA       |               | Os08g0520300 |                          | Oligouridylate-binding protein 1C                                      |
| maker-8-augustus-gene-272.0-mRNA-1   | Japonica | Japonica |               | Os08g0521000 | OsR498G0816482100.01.T01 |                                                                        |
| maker-8-augustus-gene-272.13-mRNA-1  | Japonica | Japonica | Kinase-LRR-TM | Os08g0521200 | OsR498G0816482400.01.T01 | Putative transferase, protein kinase RLK-Pelle-LRR-III family          |
| maker-8-augustus-gene-272.15-mRNA-1  | Japonica | Indica   |               | Os08g0521300 | OsR498G0816482800.01.T01 | Ras guanine nucleotide exchange factor K                               |
| maker-8-augustus-gene-272.18-mRNA-1  | Japonica | NA       |               | Os08g0521800 | OsR498G0816483800.01.T01 | L-ascorbate peroxidase (Fragment)                                      |
| maker-8-augustus-gene-272.2-mRNA-1   | Japonica | Japonica |               | Os08g0521400 | OsR498G0816482900.01.T05 | RanBP2-type zinc finger protein                                        |
| maker-8-augustus-gene-272.21-mRNA-1  | Japonica | NA       |               | Os08g0522100 |                          | ATP-dependent DNA helicase                                             |
| maker-8-augustus-gene-272.32-mRNA-1  | Japonica | NA       |               | Os08g0522400 |                          | L-ascorbate peroxidase                                                 |
| maker-8-augustus-gene-272.36-mRNA-1  | Japonica | NA       |               | Os08g0522500 | OsR498G0816484800.01.T01 | Chitinase                                                              |
| maker-8-augustus-gene-272.9-mRNA-1   | Japonica | NA       |               | Os08g0520900 |                          | Isoamylase 1, chloroplastic                                            |
| maker-8-augustus-gene-273.40-mRNA-1  | Japonica | NA       |               | Os08g0522600 | OsR498G0816484900.01.T01 | DnaJ-X domain-containing protein                                       |
| maker-8-augustus-gene-273.46-mRNA-1  | Japonica | Indica   |               | Os08g0564800 | OsR498G0816487100.01.T01 | mediator of RNA polymerase II transcription subunit 15a                |
| maker-8-augustus-gene-273.50-mRNA-1  | Japonica | Japonica |               | Os08g0524100 | OsR498G0917754500.01.T01 | Type II inositol polyphosphate 5-phosphatase 15                        |
| maker-8-augustus-gene-273.53-mRNA-1  | Japonica | NA       |               | Os08g0524000 | OsR498G0816489400.01.T02 | Signal recognition particle receptor subunit beta                      |
| maker-8-augustus-gene-273.56-mRNA-1  | Japonica | Japonica |               | Os08g0524200 | OsR498G0816490600.01.T01 | Cytochrome b561 and DOMON domain-containing protein (Fragment)         |
| maker-8-augustus-gene-274.0-mRNA-1   | Japonica | Japonica |               | Os08g0524600 | OsR498G0816492300.01.T01 | 60S ribosomal protein L32                                              |
| maker-8-augustus-gene-274.13-mRNA-1  | Japonica | NA       |               | Os08g0525000 | OsR498G0816495600.01.T01 | Ras-related protein ARA-4                                              |
| maker-8-augustus-gene-274.15-mRNA-1  | Japonica | NA       |               |              | OsR498G0816495800.01.T01 | EPIDERMAL PATTERNING FACTOR-like protein 9                             |
| maker-8-augustus-gene-274.17-mRNA-1  | Japonica | NA       |               | Os08g0525700 | OsR498G0816497000.01.T01 |                                                                        |
| maker-8-augustus-gene-274.20-mRNA-1  | Japonica | Japonica |               | Os08g0525800 | OsR498G0917759000.01.T01 | Glucan endo-1,3-beta-D-glucosidase                                     |
| maker-8-augustus-gene-274.22-mRNA-1  | Japonica | NA       |               |              |                          | Glucan endo-1,3-beta-D-glucosidase                                     |
| maker-8-augustus-gene-274.3-mRNA-1   | Japonica | Japonica |               | Os08g0524800 | OsR498G0917757000.01.T01 | BHLH transcription factor                                              |
| maker-8-augustus-gene-274.6-mRNA-1   | Japonica | Japonica |               | Os08g0525600 | OsR498G0816496700.01.T01 | Peptidylprolyl isomerase                                               |
| maker-8-augustus-gene-275.28-mRNA-1  | Japonica | NA       |               |              |                          | Ferredoxin-plastoquinone reductase, PGR5-like protein 1, chloroplastic |
| maker-8-augustus-gene-275.32-mRNA-1  | Japonica | NA       |               | Os08g0526500 | OsR498G0816500100.01.T02 | Ankyrin repeat and SAM domain-containing protein 6                     |
| maker-8-augustus-gene-275.35-mRNA-1  | Japonica | NA       |               |              |                          | UBA domain-containing protein (Fragment)                               |
| maker-8-augustus-gene-275.50-mRNA-1  | Japonica | NA       |               | Os08g0527400 |                          | Ubiquitinyl hydrolase 1                                                |
| maker-8-augustus-gene-276.11-mRNA-1  | Japonica | Japonica |               | Os08g0527900 | OsR498G0816500700.01.T02 | Ubiquitinyl hydrolase 1                                                |
| maker-8-augustus-gene-276.7-mRNA-1   | Japonica | NA       |               |              |                          | Ubiquitinyl hydrolase 1                                                |
| maker-8-augustus-gene-278.14-mRNA-1  | Japonica | NA       |               |              |                          | MADS-box transcription factor 56                                       |
| maker-8-augustus-gene-278.18-mRNA-1  | Japonica | NA       |               | Os08g0532400 | OsR498G0816520500.01.T01 | Nodulin-like domain-containing protein (Fragment)                      |
| maker-8-augustus-gene-278.20-mRNA-1  | Japonica | NA       |               | Os08g0532200 | OsR498G0816520200.01.T01 | Glutamate-1-semialdehyde 2,1-aminomutase, chloroplastic                |
| maker-8-augustus-gene-278.23-mRNA-1  | Japonica | NA       |               | Os08g0532300 | OsR498G0816520400.01.T01 | NTF2 domain-containing protein                                         |
| maker-8-augustus-gene-278.26-mRNA-1  | Japonica | NA       |               | Os08g0532700 | OsR498G0816521200.01.T01 | Peroxidase                                                             |
| maker-8-augustus-gene-278.28-mRNA-1  | Japonica | NA       |               | Os08g0532800 | OsR498G0816521800.01.T01 | AAI domain-containing protein                                          |
| maker-8-augustus-gene-278.30-mRNA-1  | Japonica | NA       |               | Os08g0532900 | OsR498G0816522000.01.T01 | Transmembrane emp24 domain-containing protein 3                        |
| maker-8-augustus-gene-278.5-mRNA-1   | Japonica | NA       |               | Os08g0531600 | OsR498G0816518900.01.T01 | Teosinte glume architecture 1                                          |
| maker-8-augustus-gene-278.8-mRNA-1   | Japonica | NA       |               | Os08g0531700 | OsR498G0816519300.01.T05 | Developmental protein like                                             |
| maker-8-augustus-gene-279.30-mRNA-1  | Japonica | NA       |               | Os08g0533300 | OsR498G0816523500.01.T01 | ACT domain-containing protein ACR4                                     |
| maker-8-augustus-gene-279.32-mRNA-1  | Japonica | NA       |               | Os08g0533600 | OsR498G0816524700.01.T02 | ACT domain repeat 6                                                    |
| maker-8-augustus-gene-279.36-mRNA-1  | Japonica | NA       |               | Os08g0533700 | OsR498G0816524900.01.T03 | Vesicle transport protein, Use                                         |
| maker-8-augustus-gene-279.45-mRNA-1  | Japonica | NA       |               | Os08g0534900 | OsR498G0816525300.01.T04 | TOG domain-containing protein (Fragment)                               |
| maker-8-augustus-gene-280.103-mRNA-1 | Japonica | NA       |               | Os08g0535100 | OsR498G0816528200.01.T01 |                                                                        |
| maker-8-augustus-gene-280.105-mRNA-1 | Japonica | NA       |               | Os08g0535200 | OsR498G0816529000.01.T01 | Bidirectional sugar transporter SWEET                                  |
| maker-8-augustus-gene-281.20-mRNA-1  | Japonica | Japonica |               | Os08g0535700 | OsR498G0816530900.01.T01 | Glycerophosphodiester phosphodiesterase                                |
| maker-8-augustus-gene-281.24-mRNA-1  | Japonica | NA       |               | Os08g0535800 | OsR498G0816531500.01.T01 | NAC transcription factor                                               |

|                                     |          |          |               |              |                          |                                                              |
|-------------------------------------|----------|----------|---------------|--------------|--------------------------|--------------------------------------------------------------|
| maker-8-augustus-gene-281.27-mRNA-1 | Japonica | NA       |               | Os08g0536000 | OsR498G0816532500.01.T01 | Pyruvate dehydrogenase (acetyl-transferring)                 |
| maker-8-augustus-gene-281.31-mRNA-1 | Japonica | Indica   |               | Os08g0536100 | OsR498G0816532700.01.T01 |                                                              |
| maker-8-augustus-gene-281.36-mRNA-1 | Japonica | NA       |               | Os08g0536200 | OsR498G0816532900.01.T01 |                                                              |
| maker-8-augustus-gene-281.38-mRNA-1 | Japonica | NA       |               | Os08g0535400 | OsR498G0816530400.01.T02 | S-acyltransferase                                            |
| maker-8-augustus-gene-281.41-mRNA-1 | Japonica | Japonica |               | Os08g0535600 | OsR498G1220874000.01.T02 | Mitochondrial import inner membrane translocase subunit      |
| maker-8-augustus-gene-281.43-mRNA-1 | Japonica | NA       |               | Os08g0536300 | OsR498G0816533200.01.T01 | Zinc finger, B-box                                           |
| maker-8-augustus-gene-282.0-mRNA-1  | Japonica | NA       |               |              |                          | NOP5NT domain-containing protein                             |
| maker-8-augustus-gene-282.2-mRNA-1  | Japonica | Indica   |               | Os09g0510500 | OsR498G0816537200.01.T02 | BHLH transcription factor                                    |
| maker-8-augustus-gene-282.7-mRNA-1  | Japonica | NA       |               | Os08g0537600 | OsR498G0816540800.01.T02 | Discolored-paralog2                                          |
| maker-8-augustus-gene-283.0-mRNA-1  | Japonica | NA       |               |              | OsR498G0816541500.01.T04 | O-fucosyltransferase family protein                          |
| maker-8-augustus-gene-283.16-mRNA-1 | Japonica | NA       |               | Os08g0538600 | OsR498G0816542900.01.T03 | Stress up-regulated Nod 19                                   |
| maker-8-augustus-gene-283.19-mRNA-1 | Japonica | NA       |               | Os08g0539300 | OsR498G0816544900.01.T01 | RING/U-box superfamily protein (Fragment)                    |
| maker-8-augustus-gene-283.25-mRNA-1 | Japonica | NA       |               |              | OsR498G0816541400.01.T01 | Ubiquitin thioesterase                                       |
| maker-8-augustus-gene-283.30-mRNA-1 | Japonica | NA       |               |              | OsR498G0816543200.01.T02 | Retinoblastoma family3                                       |
| maker-8-augustus-gene-283.36-mRNA-1 | Japonica | NA       |               |              | OsR498G0816543400.01.T01 | DNA polymerase zeta processivity subunit like                |
| maker-8-augustus-gene-283.37-mRNA-1 | Japonica | NA       |               | Os08g0538800 | OsR498G0816543400.01.T03 | Pentatricopeptide repeat-containing protein, chloroplastic   |
| maker-8-augustus-gene-283.4-mRNA-1  | Japonica | NA       |               | Os08g0538000 | OsR498G0816541900.01.T01 | Diadenosine tetraphosphate synthetase                        |
| maker-8-augustus-gene-283.42-mRNA-1 | Japonica | NA       |               |              |                          | S-acyltransferase                                            |
| maker-8-augustus-gene-283.9-mRNA-1  | Japonica | NA       | Kinase-TM     | Os08g0538300 | OsR498G0816542500.01.T02 | Chitin elicitor receptor kinase 1                            |
| maker-8-augustus-gene-284.0-mRNA-1  | Japonica | Indica   |               | Os09g0513000 | OsR498G0816548500.01.T01 | Ankyrin repeat domain-containing protein 2                   |
| maker-8-augustus-gene-284.12-mRNA-1 | Japonica | NA       |               | Os08g0540300 | OsR498G0816551500.01.T01 | probable E3 ubiquitin-protein ligase ARI8                    |
| maker-8-augustus-gene-284.17-mRNA-1 | Japonica | Japonica | CC-NBS-TM     | Os08g0539400 | OsR498G0816548000.01.T01 | Resistance protein RGA2                                      |
| maker-8-augustus-gene-284.19-mRNA-1 | Japonica | NA       |               |              |                          | Solute carrier family 35 member F1                           |
| maker-8-augustus-gene-284.25-mRNA-1 | Japonica | NA       |               | Os08g0540400 | OsR498G0816552000.01.T01 | Calcium-dependent protein kinase                             |
| maker-8-augustus-gene-284.4-mRNA-1  | Japonica | NA       | CC-LRR-NBS-TM | Os08g0539700 | OsR498G0816548900.01.T01 | Brown planthopper resistance protein BPH1/9                  |
| maker-8-augustus-gene-284.6-mRNA-1  | Japonica | Indica   | PIBH8         | Os08g0539700 | OsR498G0816550100.01.T01 | Brown planthopper resistance protein BPH1/9                  |
| maker-8-augustus-gene-284.7-mRNA-1  | Japonica | Indica   | LRR-NBS-TM    | Os08g0539700 | OsR498G0816550500.01.T01 | Pib variant protein (Fragment)                               |
| maker-8-augustus-gene-284.9-mRNA-1  | Japonica | NA       |               | Os08g0540100 | OsR498G0816550900.01.T01 | Biotin synthase, mitochondrial                               |
| maker-8-augustus-gene-285.44-mRNA-1 | Japonica | NA       |               | Os08g0540500 | OsR498G0816552100.01.T04 | Bin3-type SAM domain-containing protein                      |
| maker-8-augustus-gene-285.49-mRNA-1 | Japonica | Indica   |               | Os08g0541400 | OsR498G0816552900.01.T01 | Peptidylprolyl isomerase                                     |
| maker-8-augustus-gene-285.52-mRNA-1 | Japonica | NA       |               | Os08g0542100 | OsR498G0816554900.01.T01 | 60S ribosomal protein L7                                     |
| maker-8-augustus-gene-285.55-mRNA-1 | Japonica | NA       | LRR           |              | OsR498G0816555300.01.T02 | NB-ARC domain-containing protein                             |
| maker-8-augustus-gene-285.62-mRNA-1 | Japonica | NA       |               | Os08g0542700 | OsR498G0816557100.01.T01 | Ankyrin repeat                                               |
| maker-8-augustus-gene-285.64-mRNA-1 | Japonica | NA       |               | Os08g0541500 | OsR498G0816554000.01.T01 | PHD finger protein rhinoceros-like                           |
| maker-8-augustus-gene-285.66-mRNA-1 | Japonica | Indica   |               | Os12g0628500 | OsR498G0816554800.01.T02 | Methionine aminopeptidase 2                                  |
| maker-8-augustus-gene-286.0-mRNA-1  | Japonica | NA       |               | Os08g0542900 | OsR498G0816557500.01.T01 | HTH La-type RNA-binding domain-containing protein (Fragment) |
| maker-8-augustus-gene-286.10-mRNA-1 | Japonica | NA       |               |              | OsR498G0816557800.01.T01 |                                                              |
| maker-8-augustus-gene-286.12-mRNA-1 | Japonica | NA       |               |              |                          | Dynein heavy chain, cytoplasmic                              |
| maker-8-augustus-gene-286.5-mRNA-1  | Japonica | Japonica |               | Os08g0543400 | OsR498G0816559900.01.T04 | Putrescine hydroxycinnamoyltransferase 1                     |
| maker-8-augustus-gene-286.8-mRNA-1  | Japonica | NA       |               | Os08g0543900 | OsR498G0816562300.01.T06 | probable transcription factor PosF21                         |
| maker-8-augustus-gene-287.31-mRNA-1 | Japonica | NA       |               |              | OsR498G0816563700.01.T02 | ABC transporter domain-containing protein                    |
| maker-8-augustus-gene-287.35-mRNA-1 | Japonica | NA       |               | Os08g0544900 | OsR498G0816564900.01.T03 | 3-hydroxy-3-methylglutaryl coenzyme A synthase               |
| maker-8-augustus-gene-287.40-mRNA-1 | Japonica | NA       |               |              | OsR498G0816567100.01.T03 | Pheromone shutdown, TraB                                     |
| maker-8-augustus-gene-287.42-mRNA-1 | Japonica | NA       |               | Os08g0544500 | OsR498G0816564000.01.T06 | Nck-associated protein 1                                     |
| maker-8-augustus-gene-287.45-mRNA-1 | Japonica | NA       |               | Os08g0545600 |                          | Aldehyde oxygenase (deformylating)                           |
| maker-8-augustus-gene-287.47-mRNA-1 | Japonica | NA       |               | Os08g0545800 | OsR498G0816567400.01.T01 |                                                              |
| maker-8-augustus-gene-287.49-mRNA-1 | Japonica | Japonica |               | Os08g0546100 | OsR498G0816568800.01.T01 | BCL-2-associated athanogene                                  |
| maker-8-augustus-gene-288.0-mRNA-1  | Japonica | NA       |               |              | OsR498G0816569300.01.T01 | AAI domain-containing protein (Fragment)                     |
| maker-8-augustus-gene-288.14-mRNA-1 | Japonica | NA       |               | Os08g0546700 | OsR498G0816570400.01.T01 | RHOMBOLD-like protein (Fragment)                             |
| maker-8-augustus-gene-288.18-mRNA-1 | Japonica | Japonica |               | Os08g0546800 | OsR498G0816570600.01.T01 | Heat-responsive transcription factor                         |
| maker-8-augustus-gene-288.2-mRNA-1  | Japonica | NA       |               | Os08g0547100 | OsR498G0816571500.01.T01 | Probable 6-phosphogluconolactonase 3, chloroplastic          |
| maker-8-augustus-gene-288.22-mRNA-1 | Japonica | NA       |               | Os08g0546900 | OsR498G0816571000.01.T01 | LRAT domain-containing protein (Fragment)                    |
| maker-8-augustus-gene-288.24-mRNA-1 | Japonica | NA       |               | Os08g0547300 | OsR498G0816572600.01.T01 | Cytochrome P450 family 78 subfamily A polypeptide 8          |
| maker-8-augustus-gene-288.26-mRNA-1 | Japonica | NA       |               | Os08g0547500 | OsR498G0816573200.01.T01 | Kinesin motor domain-containing protein                      |
| maker-8-augustus-gene-288.31-mRNA-1 | Japonica | NA       |               | Os08g0547600 | OsR498G0816574600.01.T02 | Protein SHORT INTERNODES                                     |
| maker-8-augustus-gene-288.8-mRNA-1  | Japonica | NA       |               | Os08g0546400 | OsR498G0816569600.01.T01 | Plant UBX domain-containing protein 8                        |
| maker-8-augustus-gene-289.33-mRNA-1 | Japonica | NA       |               | Os08g0548200 | OsR498G0816577700.01.T01 | ER lumen protein-retaining receptor                          |
| maker-8-augustus-gene-289.38-mRNA-1 | Japonica | NA       |               | Os08g0548300 | OsR498G0816577900.01.T01 | E3 ubiquitin ligase BIG BROther-related                      |
| maker-8-augustus-gene-289.44-mRNA-1 | Japonica | Indica   |               | Os09g0536400 | OsR498G0816579700.01.T02 | Thaumatococcus-like protein 1b                               |
| maker-8-augustus-gene-289.48-mRNA-1 | Japonica | Indica   |               | Os08g0548000 | OsR498G0816577200.01.T03 | MYB transcriptional factor                                   |
| maker-8-augustus-gene-289.50-mRNA-1 | Japonica | NA       |               | Os08g0549000 | OsR498G0816581200.01.T01 | MYB domain class transcription factor                        |

|                                     |          |          |  |              |                          |                                                                           |
|-------------------------------------|----------|----------|--|--------------|--------------------------|---------------------------------------------------------------------------|
| maker-8-augustus-gene-289.52-mRNA-1 | Japonica | NA       |  | Os08g0549100 | OsR498G0816581800.01.T02 | Peroxisomal ascorbate peroxidase                                          |
| maker-8-augustus-gene-290.0-mRNA-1  | Japonica | NA       |  | Os08g0549200 | OsR498G0816581900.01.T01 | SUEL-type lectin domain-containing protein                                |
| maker-8-augustus-gene-290.11-mRNA-1 | Japonica | NA       |  | Os08g0551200 | OsR498G0816586500.01.T01 | DUF632 domain-containing protein                                          |
| maker-8-augustus-gene-290.15-mRNA-1 | Japonica | NA       |  | Os08g0549300 | OsR498G0816582400.01.T01 | Acyl carrier protein 3, chloroplastic                                     |
| maker-8-augustus-gene-290.19-mRNA-1 | Japonica | NA       |  | Os08g0550100 | OsR498G0816584000.01.T01 | 26S proteasome non-ATPase regulatory subunit 3                            |
| maker-8-augustus-gene-290.23-mRNA-1 | Japonica | NA       |  | Os08g0550200 | OsR498G0816584200.01.T01 | Protein DETOXIFICATION                                                    |
| maker-8-augustus-gene-290.27-mRNA-1 | Japonica | NA       |  | Os08g0550400 | OsR498G0816584800.01.T01 | NEP1-interacting protein 1                                                |
| maker-8-augustus-gene-290.3-mRNA-1  | Japonica | NA       |  | Os08g0549600 | OsR498G0816583100.01.T01 | BZIP domain-containing protein                                            |
| maker-8-augustus-gene-290.5-mRNA-1  | Japonica | NA       |  |              | OsR498G0816585300.01.T01 | Glutathione transferase                                                   |
| maker-8-augustus-gene-290.9-mRNA-1  | Japonica | NA       |  | Os08g0550600 | OsR498G0816585700.01.T01 | Cation/H(+) antiporter 2                                                  |
| maker-8-augustus-gene-291.0-mRNA-1  | Japonica | Japonica |  | Os08g0553000 | OsR498G0816589300.01.T01 |                                                                           |
| maker-8-augustus-gene-291.1-mRNA-1  | Japonica | NA       |  | Os08g0553500 | OsR498G0816589700.01.T01 |                                                                           |
| maker-8-augustus-gene-291.11-mRNA-1 | Japonica | Japonica |  | Os08g0554300 | OsR498G0816591100.01.T03 | Rhamnogalacturonan endolyase                                              |
| maker-8-augustus-gene-291.2-mRNA-1  | Japonica | NA       |  | Os08g0554000 | OsR498G0816590700.01.T06 | WD repeat-containing protein DWA2                                         |
| maker-8-augustus-gene-291.20-mRNA-1 | Japonica | NA       |  |              |                          | FBD domain-containing protein                                             |
| maker-8-augustus-gene-291.24-mRNA-1 | Japonica | NA       |  | Os08g0552700 |                          |                                                                           |
| maker-8-augustus-gene-291.27-mRNA-1 | Japonica | NA       |  | Os08g0553800 | OsR498G0816590200.01.T02 | NmrA domain-containing protein (Fragment)                                 |
| maker-8-augustus-gene-291.30-mRNA-1 | Japonica | NA       |  | Os08g0554400 |                          | Indeterminate domain p1                                                   |
| maker-8-augustus-gene-291.6-mRNA-1  | Japonica | NA       |  |              | OsR498G0816590900.01.T06 | O-fucosyltransferase family protein (Fragment)                            |
| maker-8-augustus-gene-292.40-mRNA-1 | Japonica | NA       |  | Os08g0554900 | OsR498G0816593500.01.T01 | Transmembrane 9 superfamily member                                        |
| maker-8-augustus-gene-292.41-mRNA-1 | Japonica | NA       |  | Os08g0554900 | OsR498G0816593500.01.T01 | Transmembrane 9 superfamily member                                        |
| maker-8-augustus-gene-292.42-mRNA-1 | Japonica | NA       |  | Os08g0555200 | OsR498G0816594700.01.T01 | Transmembrane 9 superfamily member                                        |
| maker-8-augustus-gene-292.61-mRNA-1 | Japonica | Indica   |  | Os09g0557800 | OsR498G0816594900.01.T02 | Transmembrane 9 superfamily member                                        |
| maker-8-augustus-gene-292.63-mRNA-1 | Japonica | NA       |  | Os08g0555800 | OsR498G0816595900.01.T05 | Multipolar spindle 1                                                      |
| maker-8-augustus-gene-292.68-mRNA-1 | Japonica | NA       |  | Os08g0556200 | OsR498G0816597300.01.T02 | 7,8-dihydroneopterin aldolase                                             |
| maker-8-augustus-gene-292.79-mRNA-1 | Japonica | NA       |  | Os08g0556600 | OsR498G0816598500.01.T01 | Fiber protein Fb14                                                        |
| maker-8-augustus-gene-292.83-mRNA-1 | Japonica | NA       |  | Os08g0556000 | OsR498G0816597000.01.T02 | YTH domain-containing family protein 1                                    |
| maker-8-augustus-gene-292.88-mRNA-1 | Japonica | Indica   |  | Os08g0556300 | OsR498G0816597800.01.T01 | GLTP domain-containing protein                                            |
| maker-8-augustus-gene-293.0-mRNA-1  | Japonica | NA       |  | Os08g0557000 | OsR498G0816599700.01.T01 | Protein-L-isoaspartate(D-aspartate) O-methyltransferase                   |
| maker-8-augustus-gene-293.11-mRNA-1 | Japonica | NA       |  | Os08g0557800 | OsR498G0816602100.01.T01 | Fatty acyl-CoA reductase                                                  |
| maker-8-augustus-gene-293.15-mRNA-1 | Japonica | NA       |  | Os08g0558200 | OsR498G0816603500.01.T01 | Thioredoxin family protein isoform 2                                      |
| maker-8-augustus-gene-293.2-mRNA-1  | Japonica | NA       |  |              | OsR498G0816601500.01.T06 | Peptidylprolyl isomerase                                                  |
| maker-8-augustus-gene-293.20-mRNA-1 | Japonica | NA       |  |              | OsR498G0816598800.01.T02 | Phosphatidylinositol-3-phosphatase myotubularin-1                         |
| maker-8-augustus-gene-293.26-mRNA-1 | Japonica | Indica   |  | Os08g0557100 | OsR498G0816600000.01.T01 | Ribonucleoprotein, chloroplastic                                          |
| maker-8-augustus-gene-293.29-mRNA-1 | Japonica | NA       |  | Os08g0557400 | OsR498G0816600800.01.T01 | Acid phosphatase                                                          |
| maker-8-augustus-gene-293.32-mRNA-1 | Japonica | NA       |  | Os08g0557900 | OsR498G0816602400.01.T03 | Uridine nucleosidase 1                                                    |
| maker-8-augustus-gene-293.35-mRNA-1 | Japonica | NA       |  | Os08g0558100 | OsR498G0816602800.01.T03 | Calcium-binding protein CML48                                             |
| maker-8-augustus-gene-293.4-mRNA-1  | Japonica | Japonica |  | Os08g0557600 | OsR498G0917967100.01.T03 | Monodehydroascorbate reductase                                            |
| maker-8-augustus-gene-293.40-mRNA-1 | Japonica | NA       |  |              |                          | Kinesin-like protein KIN-5C                                               |
| maker-8-augustus-gene-293.45-mRNA-1 | Japonica | NA       |  | Os08g0558600 | OsR498G0816605000.01.T02 | Vesicle-associated membrane protein 727                                   |
| maker-8-augustus-gene-293.6-mRNA-1  | Japonica | NA       |  | Os08g0557700 | OsR498G0816601700.01.T01 | Histidine-containing phosphotransfer protein 1                            |
| maker-8-augustus-gene-294.46-mRNA-1 | Japonica | NA       |  | Os08g0558900 | OsR498G0816605700.01.T01 | ATPase inhibitor, IATP, mitochondria                                      |
| maker-8-augustus-gene-294.48-mRNA-1 | Japonica | NA       |  | Os08g0559200 | OsR498G0816606100.01.T01 | 40S ribosomal protein S25                                                 |
| maker-8-augustus-gene-294.51-mRNA-1 | Japonica | NA       |  | Os08g0559300 | OsR498G0816606900.01.T01 | Probable UDP-N-acetylglucosamine--peptide N-acetylglucosaminyltransferase |
| maker-8-augustus-gene-294.57-mRNA-1 | Japonica | NA       |  | Os08g0559600 | OsR498G0816607900.01.T01 | dihydroxy-acid dehydratase, chloroplastic-like                            |
| maker-8-augustus-gene-294.62-mRNA-1 | Japonica | NA       |  | Os08g0559700 | OsR498G0816608100.01.T04 |                                                                           |
| maker-8-augustus-gene-294.65-mRNA-1 | Japonica | NA       |  | Os08g0559900 | OsR498G0816608500.01.T02 | Nucleotidyltransferase family protein                                     |
| maker-8-augustus-gene-294.71-mRNA-1 | Japonica | NA       |  | Os08g0560500 | OsR498G0816612500.01.T01 | Carboxypeptidase                                                          |
| maker-8-augustus-gene-294.76-mRNA-1 | Japonica | NA       |  | Os08g0558700 | OsR498G0816605200.01.T01 | MMtag domain-containing protein (Fragment)                                |
| maker-8-augustus-gene-294.79-mRNA-1 | Japonica | Indica   |  | Os08g0559000 | OsR498G0816606000.01.T02 | Copper ion binding isoform 1                                              |
| maker-8-augustus-gene-294.81-mRNA-1 | Japonica | Indica   |  | Os08g0559400 | OsR498G0816607600.01.T02 | Peptidyl-prolyl cis-trans isomerase                                       |
| maker-8-augustus-gene-294.88-mRNA-1 | Japonica | Indica   |  | Os08g0559800 | OsR498G0816608400.01.T01 |                                                                           |
| maker-8-augustus-gene-294.93-mRNA-1 | Japonica | Indica   |  | Os08g0560600 | OsR498G0816612800.01.T01 | DnaJ subfamily C member like                                              |
| maker-8-augustus-gene-295.41-mRNA-1 | Japonica | NA       |  | Os08g0561500 | OsR498G0816615300.01.T01 |                                                                           |
| maker-8-augustus-gene-295.47-mRNA-1 | Japonica | NA       |  | Os08g0561900 | OsR498G0816616300.01.T01 | Expansin                                                                  |
| maker-8-augustus-gene-295.49-mRNA-1 | Japonica | NA       |  | Os08g0562100 | OsR498G0816616900.01.T01 | Malate dehydrogenase                                                      |
| maker-8-augustus-gene-295.52-mRNA-1 | Japonica | NA       |  | Os08g0561600 | OsR498G0816615600.01.T01 | Upstream of FLC1 protein isoform X8                                       |
| maker-8-augustus-gene-295.55-mRNA-1 | Japonica | NA       |  | Os08g0562200 | OsR498G0816617200.01.T01 | NAC transcription factor                                                  |
| maker-8-augustus-gene-295.58-mRNA-1 | Japonica | NA       |  | Os08g0562300 |                          | Protein SENSITIVE TO PROTON RHIZOTOXICITY like                            |
| maker-8-augustus-gene-295.59-mRNA-1 | Japonica | NA       |  | Os08g0562500 | OsR498G0816619200.01.T01 | BAHD acyltransferase DCR                                                  |
| maker-8-augustus-gene-295.61-mRNA-1 | Japonica | NA       |  |              | OsR498G0816619600.01.T07 | Puromycin-sensitive aminopeptidase                                        |

|                                     |          |          |               |              |                          |                                                                   |
|-------------------------------------|----------|----------|---------------|--------------|--------------------------|-------------------------------------------------------------------|
| maker-8-augustus-gene-296.0-mRNA-1  | Japonica | NA       |               |              | OsR498G0816620300.01.T02 |                                                                   |
| maker-8-augustus-gene-296.2-mRNA-1  | Japonica | NA       |               | Os08g0563300 | OsR498G0816620200.01.T01 | t-SNARE coiled-coil homology domain-containing protein (Fragment) |
| maker-8-augustus-gene-296.4-mRNA-1  | Japonica | NA       |               | Os08g0564100 | OsR498G0816623400.01.T01 | ABC transporter GCN1                                              |
| maker-8-augustus-gene-297.0-mRNA-1  | Japonica | NA       |               |              |                          | GTP diphosphokinase                                               |
| maker-8-augustus-gene-297.15-mRNA-1 | Japonica | NA       |               | Os08g0566600 | OsR498G0816632900.01.T01 | Proton gradient regulation 5                                      |
| maker-8-augustus-gene-297.17-mRNA-1 | Japonica | NA       |               | Os08g0566900 | OsR498G0816634100.01.T04 | Peroxisomal membrane protein PMP22                                |
| maker-8-augustus-gene-297.19-mRNA-1 | Japonica | NA       |               | Os08g0567000 | OsR498G0816634700.01.T01 | Type 1 membrane protein-like                                      |
| maker-8-augustus-gene-297.2-mRNA-1  | Japonica | NA       |               | Os08g0565800 | OsR498G0816631300.01.T01 | Glutaredoxin-C5 chloroplastic                                     |
| maker-8-augustus-gene-297.24-mRNA-1 | Japonica | NA       |               | Os08g0564800 | OsR498G0816627600.01.T02 | Mediator of RNA polymerase II transcription subunit 15a           |
| maker-8-augustus-gene-297.32-mRNA-1 | Japonica | NA       |               | Os08g0566000 | OsR498G0816631800.01.T01 | Bifunctional TH2 protein, mitochondrial                           |
| maker-8-augustus-gene-297.35-mRNA-1 | Japonica | NA       |               | Os08g0566100 | OsR498G0816632600.01.T01 | Carboxyl-terminal peptidase-like                                  |
| maker-8-augustus-gene-297.40-mRNA-1 | Japonica | Japonica |               | Os08g0566700 | OsR498G0816633400.01.T01 | Exocyst complex component EXO84C                                  |
| maker-8-augustus-gene-297.7-mRNA-1  | Japonica | NA       |               | Os08g0565900 | OsR498G0816631500.01.T01 | GDSL esterase/lipase                                              |
| maker-8-augustus-gene-297.9-mRNA-1  | Japonica | NA       |               | Os08g0566400 | OsR498G0816632700.01.T01 | Ketohexokinase                                                    |
| maker-8-augustus-gene-3.34-mRNA-1   | Japonica | NA       |               | Os08g0104700 | OsR498G0815035700.01.T02 | 1-phosphatidylinositol-3-phosphate 5-kinase                       |
| maker-8-augustus-gene-3.37-mRNA-1   | Japonica | Indica   |               | Os08g0106300 | OsR498G0815039700.01.T01 | Indole-2-monooxygenase                                            |
| maker-8-augustus-gene-3.39-mRNA-1   | Japonica | NA       |               | Os08g0104100 | OsR498G0815033400.01.T01 | Transmembrane protein 18                                          |
| maker-8-augustus-gene-3.47-mRNA-1   | Japonica | NA       |               | Os08g0105100 | OsR498G0815038000.01.T02 | F-box protein isoform B                                           |
| maker-8-augustus-gene-3.51-mRNA-1   | Japonica | NA       |               | Os08g0105800 | OsR498G0815039000.01.T01 | Indole-2-monooxygenase                                            |
| maker-8-augustus-gene-31.60-mRNA-1  | Japonica | NA       |               | Os08g0150500 |                          | F-box domain-containing protein                                   |
| maker-8-augustus-gene-31.62-mRNA-1  | Japonica | NA       |               |              | OsR498G0815196000.01.T02 | FBD domain-containing protein                                     |
| maker-8-augustus-gene-37.16-mRNA-1  | Japonica | Indica   |               | Os08g0160300 | OsR498G0815241900.01.T02 | probable transcription factor KAN2                                |
| maker-8-augustus-gene-37.21-mRNA-1  | Japonica | NA       |               | Os08g0159800 | OsR498G0815240600.01.T01 | Zinc finger CCCH domain-containing protein 56                     |
| maker-8-augustus-gene-37.23-mRNA-1  | Japonica | NA       |               | Os08g0160000 | OsR498G0815241200.01.T01 | THO complex subunit 7                                             |
| maker-8-augustus-gene-37.25-mRNA-1  | Japonica | NA       |               | Os08g0160500 | OsR498G0815243400.01.T01 | Probable mixed-linked glucan synthase 6                           |
| maker-8-augustus-gene-38.0-mRNA-1   | Japonica | NA       |               |              | OsR498G0815247100.01.T01 |                                                                   |
| maker-8-augustus-gene-38.10-mRNA-1  | Japonica | Indica   |               | Os05g0243300 | OsR498G0815249300.01.T01 | Ribosomal protein L13                                             |
| maker-8-augustus-gene-38.15-mRNA-1  | Japonica | NA       |               |              | OsR498G0815247000.01.T01 |                                                                   |
| maker-8-augustus-gene-38.17-mRNA-1  | Japonica | NA       |               | Os08g0161500 | OsR498G0815247400.01.T02 | Abhydrolase domain-containing protein                             |
| maker-8-augustus-gene-38.2-mRNA-1   | Japonica | NA       |               | Os08g0161700 | OsR498G0815247900.01.T01 | Putative Zinc finger, CHCC-type                                   |
| maker-8-augustus-gene-38.21-mRNA-1  | Japonica | NA       |               | Os08g0161800 | OsR498G0815248400.01.T01 | Choline-phosphate cytidylyltransferase B                          |
| maker-8-augustus-gene-38.23-mRNA-1  | Japonica | Indica   |               | Os08g0161900 | OsR498G0815248600.01.T01 | DnaJ protein like                                                 |
| maker-8-augustus-gene-38.4-mRNA-1   | Japonica | NA       |               |              | OsR498G0815248100.01.T01 | Secretory carrier-associated membrane protein (Fragment)          |
| maker-8-augustus-gene-38.6-mRNA-1   | Japonica | Indica   |               | Os03g0237000 | OsR498G0815249100.01.T01 | Transmembrane 9 superfamily member                                |
| maker-8-augustus-gene-39.0-mRNA-1   | Japonica | NA       |               | Os08g0162100 | OsR498G0815251300.01.T01 | Topless-related protein 1                                         |
| maker-8-augustus-gene-39.13-mRNA-1  | Japonica | NA       |               | Os08g0162600 | OsR498G0815253500.01.T01 | Rubredoxin-1 (Fragment)                                           |
| maker-8-augustus-gene-39.19-mRNA-1  | Japonica | NA       |               | Os08g0163400 | OsR498G0815255900.01.T01 | RNA polymerase sigma factor sigA                                  |
| maker-8-augustus-gene-39.28-mRNA-1  | Japonica | NA       |               | Os08g0163100 | OsR498G0306434400.01.T02 | Nuf2 family protein, expressed                                    |
| maker-8-augustus-gene-39.6-mRNA-1   | Japonica | NA       |               |              | OsR498G0815252500.01.T01 | Pentatricopeptide repeat-containing protein mitochondrial         |
| maker-8-augustus-gene-39.8-mRNA-1   | Japonica | NA       |               | Os08g0162500 | OsR498G0815253300.01.T01 |                                                                   |
| maker-8-augustus-gene-4.44-mRNA-1   | Japonica | NA       |               | Os08g0106300 | OsR498G0815040500.01.T01 | Indole-2-monooxygenase                                            |
| maker-8-augustus-gene-4.46-mRNA-1   | Japonica | NA       |               | Os08g0107300 | OsR498G0815042100.01.T01 | Putative polygalacturonase                                        |
| maker-8-augustus-gene-4.49-mRNA-1   | Japonica | NA       |               | Os08g0107500 | OsR498G0815042500.01.T02 | Ribosome maturation protein SBDS                                  |
| maker-8-augustus-gene-4.51-mRNA-1   | Japonica | NA       |               | Os08g0107600 | OsR498G0815042700.01.T01 | DRMBL domain-containing protein (Fragment)                        |
| maker-8-augustus-gene-4.54-mRNA-1   | Japonica | NA       |               | Os08g0107900 | OsR498G0815044300.01.T02 | Mago nashi family, integral exon junction complex protein         |
| maker-8-augustus-gene-4.56-mRNA-1   | Japonica | NA       |               | Os08g0108200 | OsR498G0815045300.01.T01 | Chromatin assembly factor 1 subunit B                             |
| maker-8-augustus-gene-4.63-mRNA-1   | Japonica | NA       |               |              |                          | GDP-mannose transporter GONST1                                    |
| maker-8-augustus-gene-40.53-mRNA-1  | Japonica | Japonica |               | Os08g0164300 | OsR498G0815258700.01.T01 | DUF569 domain-containing protein                                  |
| maker-8-augustus-gene-40.56-mRNA-1  | Japonica | NA       |               |              |                          | Deoxyribonuclease TATDN1                                          |
| maker-8-augustus-gene-40.64-mRNA-1  | Japonica | Japonica |               | Os08g0163900 | OsR498G0815257600.01.T01 | DUF569 domain-containing protein                                  |
| maker-8-augustus-gene-40.66-mRNA-1  | Japonica | NA       |               | Os08g0164000 |                          | DUF569 domain-containing protein (Fragment)                       |
| maker-8-augustus-gene-40.69-mRNA-1  | Japonica | NA       |               | Os08g0164100 | OsR498G0815258200.01.T01 | DUF295 domain-containing protein (Fragment)                       |
| maker-8-augustus-gene-42.36-mRNA-1  | Japonica | NA       |               | Os08g0169100 |                          |                                                                   |
| maker-8-augustus-gene-42.39-mRNA-1  | Japonica | Japonica |               | Os08g0169300 | OsR498G0815275500.01.T01 | Putative flavonoid 7-O-methyltransferase                          |
| maker-8-augustus-gene-42.48-mRNA-1  | Japonica | NA       |               | Os08g0169800 | OsR498G0815277100.01.T03 | Haloacid dehalogenase-like hydrolase domain-containing protein 3  |
| maker-8-augustus-gene-42.50-mRNA-1  | Japonica | NA       |               |              | OsR498G0815275800.01.T01 | UDP-glycosyltransferase 85A3                                      |
| maker-8-augustus-gene-42.52-mRNA-1  | Japonica | NA       |               |              | OsR498G0815277000.01.T01 | Thyroid adenoma-associated                                        |
| maker-8-augustus-gene-42.55-mRNA-1  | Japonica | Indica   | CC-LRR-NBS-TM | Os08g0170700 | OsR498G0815277600.01.T01 | NAC domain-containing protein                                     |
| maker-8-augustus-gene-42.57-mRNA-1  | Japonica | NA       |               |              | OsR498G0815279200.01.T01 |                                                                   |
| maker-8-augustus-gene-44.8-mRNA-1   | Japonica | NA       |               |              | OsR498G0815293500.01.T01 |                                                                   |
| maker-8-augustus-gene-45.30-mRNA-1  | Japonica | Indica   |               | Os08g0173600 | OsR498G0815296500.01.T01 |                                                                   |

|                                    |          |          |               |              |                          |                                                                 |
|------------------------------------|----------|----------|---------------|--------------|--------------------------|-----------------------------------------------------------------|
| maker-8-augustus-gene-45.32-mRNA-1 | Japonica | NA       |               | Os08g0174300 | OsR498G0815297700.01.T01 | Anthocyanin 5-aromatic acyltransferase                          |
| maker-8-augustus-gene-45.34-mRNA-1 | Japonica | NA       | Kinase-LRR-TM | Os08g0174700 | OsR498G0815299300.01.T01 | Non-specific serine/threonine protein kinase                    |
| maker-8-augustus-gene-45.38-mRNA-1 | Japonica | NA       | CC-NBS-TM     |              | OsR498G0815299900.01.T02 | Putative CC-NBS-LRR resistance protein MLA13                    |
| maker-8-augustus-gene-45.40-mRNA-1 | Japonica | Japonica | Kinase-TM     | Os08g0174800 | OsR498G0815299300.01.T01 | LRR receptor kinase BAK1                                        |
| maker-8-augustus-gene-45.42-mRNA-1 | Japonica | NA       |               | Os08g0174900 | OsR498G0815300300.01.T01 | RNA-binding                                                     |
| maker-8-augustus-gene-45.44-mRNA-1 | Japonica | NA       |               | Os08g0442200 | OsR498G0816183800.01.T01 | Strictosidine synthase 1                                        |
| maker-8-augustus-gene-45.45-mRNA-1 | Japonica | Indica   |               | Os08g0174100 | OsR498G0815297600.01.T01 | Phenolic glucoside malonyltransferase 2                         |
| maker-8-augustus-gene-45.47-mRNA-1 | Japonica | NA       |               | Os08g0175200 | OsR498G0815301600.01.T01 | Putative vacuolar protein sorting-associated protein 1st1       |
| maker-8-augustus-gene-46.37-mRNA-1 | Japonica | NA       |               | Os08g0176100 | OsR498G0815302500.01.T01 | Phosphopantothenate-cysteine ligase                             |
| maker-8-augustus-gene-46.43-mRNA-1 | Japonica | NA       | NBS-TM        |              |                          | Disease resistance RPP13-like protein 4                         |
| maker-8-augustus-gene-46.46-mRNA-1 | Japonica | NA       |               | Os08g0175300 | OsR498G0815301800.01.T04 | White seedling2                                                 |
| maker-8-augustus-gene-46.47-mRNA-1 | Japonica | NA       |               | Os08g0175300 | OsR498G0815302200.01.T03 | DNA polymerase I B, mitochondrial                               |
| maker-8-augustus-gene-47.28-mRNA-1 | Japonica | NA       |               | Os08g0177700 | OsR498G0815307300.01.T01 | Sm domain-containing protein (Fragment)                         |
| maker-8-augustus-gene-47.38-mRNA-1 | Japonica | NA       |               |              |                          | Plant polyA+ RNA export protein                                 |
| maker-8-augustus-gene-47.43-mRNA-1 | Japonica | NA       |               |              | OsR498G0815304200.01.T01 | Transcription factor TGA4                                       |
| maker-8-augustus-gene-47.46-mRNA-1 | Japonica | NA       |               |              | OsR498G0815305000.01.T03 | Chromatin modification-related protein EAF1 A                   |
| maker-8-augustus-gene-47.47-mRNA-1 | Japonica | NA       |               | Os08g0177300 | OsR498G0815305000.01.T05 | Chromatin modification-related protein EAF1 B                   |
| maker-8-augustus-gene-47.56-mRNA-1 | Japonica | Indica   |               | Os04g0635900 | OsR498G0815306800.01.T01 | Double-strand break repair protein MRE11                        |
| maker-8-augustus-gene-47.58-mRNA-1 | Japonica | Indica   |               | Os04g0635900 | OsR498G0815307000.01.T01 | Double-strand break repair protein MRE11                        |
| maker-8-augustus-gene-48.33-mRNA-1 | Japonica | NA       | Kinase-TM     |              | OsR498G0815310900.01.T05 | Non-specific serine/threonine protein kinase                    |
| maker-8-augustus-gene-48.37-mRNA-1 | Japonica | NA       |               | Os08g0179900 | OsR498G0815313300.01.T02 |                                                                 |
| maker-8-augustus-gene-48.40-mRNA-1 | Japonica | NA       |               |              | OsR498G0815313700.01.T01 | Histone-lysine N-methyltransferase ATXR3                        |
| maker-8-augustus-gene-48.47-mRNA-1 | Japonica | NA       |               | Os08g0178700 | OsR498G0815309600.01.T01 | diacylglycerol kinase                                           |
| maker-8-augustus-gene-48.53-mRNA-1 | Japonica | NA       |               | Os08g0178900 | OsR498G0408688000.01.T01 | NAM-associated domain-containing protein (Fragment)             |
| maker-8-augustus-gene-48.57-mRNA-1 | Japonica | NA       |               | Os08g0179400 |                          | BHLH domain-containing protein (Fragment)                       |
| maker-8-augustus-gene-48.59-mRNA-1 | Japonica | NA       |               | Os08g0180000 | OsR498G0815313600.01.T01 | mRNA cap guanine-N7 methyltransferase                           |
| maker-8-augustus-gene-49.0-mRNA-1  | Japonica | NA       |               | Os08g0180300 | OsR498G0815314100.01.T02 | Putative SNF2-domain/RING finger domain/helicase domain protein |
| maker-8-augustus-gene-49.5-mRNA-1  | Japonica | NA       |               |              | OsR498G0815314500.01.T01 | BED-type domain-containing protein                              |
| maker-8-augustus-gene-5.0-mRNA-1   | Japonica | NA       |               | Os08g0109000 | OsR498G0815048900.01.T01 | Target of Myb protein 1                                         |
| maker-8-augustus-gene-5.10-mRNA-1  | Japonica | NA       |               |              |                          | Phosphoinositide phosphatase SAC1                               |
| maker-8-augustus-gene-5.13-mRNA-1  | Japonica | Japonica |               | Os08g0109200 | OsR498G0612486200.01.T01 | Succinate-semialdehyde dehydrogenase                            |
| maker-8-augustus-gene-5.17-mRNA-1  | Japonica | NA       |               | Os08g0109400 | OsR498G0815049700.01.T06 | Auxin-responsive protein (Fragment)                             |
| maker-8-augustus-gene-5.21-mRNA-1  | Japonica | NA       |               | Os08g0109500 | OsR498G0815049900.01.T01 | Bromodomain-containing factor 2                                 |
| maker-8-augustus-gene-5.25-mRNA-1  | Japonica | NA       |               | Os08g0108700 | OsR498G0815048200.01.T01 | GLTP domain-containing protein (Fragment)                       |
| maker-8-augustus-gene-5.28-mRNA-1  | Japonica | NA       |               | Os08g0109300 | OsR498G0815049400.01.T01 | Adenylate kinase, chloroplastic                                 |
| maker-8-augustus-gene-5.32-mRNA-1  | Japonica | NA       |               |              | OsR498G0612483700.01.T01 | NOP5NT domain-containing protein                                |
| maker-8-augustus-gene-50.33-mRNA-1 | Japonica | NA       |               | Os08g0182400 |                          |                                                                 |
| maker-8-augustus-gene-50.37-mRNA-1 | Japonica | NA       |               |              | OsR498G0815325600.01.T01 |                                                                 |
| maker-8-augustus-gene-52.0-mRNA-1  | Japonica | Indica   |               | Os04g0627000 | OsR498G0815332900.01.T01 | Homeobox-leucine zipper protein MERISTEM L1                     |
| maker-8-augustus-gene-52.6-mRNA-1  | Japonica | NA       |               |              | OsR498G0815334900.01.T04 |                                                                 |
| maker-8-augustus-gene-53.39-mRNA-1 | Japonica | NA       |               | Os08g0189500 | OsR498G0815338900.01.T01 | Germin-like protein 8-6                                         |
| maker-8-augustus-gene-53.49-mRNA-1 | Japonica | Japonica |               | Os08g0190700 | OsR498G0815344500.01.T02 | CAP-Gly domain-containing linker protein 1-like                 |
| maker-8-augustus-gene-54.16-mRNA-1 | Japonica | Indica   |               | Os03g0136900 | OsR498G0815345200.01.T01 | Aconitate hydratase, cytoplasmic                                |
| maker-8-augustus-gene-54.31-mRNA-1 | Japonica | Indica   |               | Os08g0192400 | OsR498G0815349000.01.T01 | SWR1 complex subunit 2                                          |
| maker-8-augustus-gene-55.11-mRNA-1 | Japonica | NA       |               | Os08g0193600 |                          | Leucine rich repeat protein (Fragment)                          |
| maker-8-augustus-gene-55.22-mRNA-1 | Japonica | Indica   |               | Os08g0193200 | OsR498G0815353200.01.T01 | Putative F-box/LRR-repeat protein 23                            |
| maker-8-augustus-gene-55.24-mRNA-1 | Japonica | NA       |               | Os08g0193500 | OsR498G0815353600.01.T01 | Ubiquitin-protein ligase, putative, expressed                   |
| maker-8-augustus-gene-55.26-mRNA-1 | Japonica | NA       |               | Os08g0193900 | OsR498G0815356200.01.T01 | U-box domain-containing protein 4                               |
| maker-8-augustus-gene-55.28-mRNA-1 | Japonica | NA       |               |              | OsR498G0815357600.01.T01 | Putative F-box/LRR-repeat protein 22                            |
| maker-8-augustus-gene-56.0-mRNA-1  | Japonica | Indica   |               | Os08g0195400 | OsR498G0815361000.01.T03 |                                                                 |
| maker-8-augustus-gene-56.2-mRNA-1  | Japonica | NA       |               | Os08g0195800 |                          | F-box protein SKIP19                                            |
| maker-8-augustus-gene-56.4-mRNA-1  | Japonica | Japonica |               | Os08g0196200 | OsR498G0815362200.01.T01 | Leucine rich repeat protein (Fragment)                          |
| maker-8-augustus-gene-56.6-mRNA-1  | Japonica | NA       |               |              | OsR498G0815364200.01.T01 | U-box domain-containing protein 4                               |
| maker-8-augustus-gene-56.8-mRNA-1  | Japonica | NA       |               |              | OsR498G0815364400.01.T01 | F-box protein SKIP19                                            |
| maker-8-augustus-gene-57.41-mRNA-1 | Japonica | NA       |               | Os08g0196700 | OsR498G0815364700.01.T02 | CCAAT-binding transcription factor                              |
| maker-8-augustus-gene-57.45-mRNA-1 | Japonica | NA       |               | Os08g0196900 | OsR498G0815364900.01.T03 | Response regulatory domain-containing protein                   |
| maker-8-augustus-gene-57.56-mRNA-1 | Japonica | Indica   |               | Os08g0197100 | OsR498G0815365700.01.T01 | Putative FBD-associated F-box protein                           |
| maker-8-augustus-gene-57.63-mRNA-1 | Japonica | NA       |               | Os08g0197500 | OsR498G0815367100.01.T01 | Cytochrome c oxidase subunit 5B mitochondrial                   |
| maker-8-augustus-gene-57.65-mRNA-1 | Japonica | NA       |               | Os08g0197800 | OsR498G0815367900.01.T04 | Cytochrome c oxidase subunit 5B, mitochondrial                  |
| maker-8-augustus-gene-57.70-mRNA-1 | Japonica | NA       |               |              | OsR498G0815368700.01.T01 | F-box domain-containing protein (Fragment)                      |
| maker-8-augustus-gene-57.71-mRNA-1 | Japonica | NA       |               | Os08g0197800 |                          | F-box domain-containing protein                                 |



|                                    |          |          |               |              |                          |                                                              |
|------------------------------------|----------|----------|---------------|--------------|--------------------------|--------------------------------------------------------------|
| maker-8-augustus-gene-57.73-mRNA-1 | Japonica | NA       |               |              |                          | Peptidase A1 domain-containing protein                       |
| maker-8-augustus-gene-58.0-mRNA-1  | Japonica | NA       |               |              |                          | Glycolate oxidase                                            |
| maker-8-augustus-gene-58.10-mRNA-1 | Japonica | NA       |               | Os08g0199300 | OsR498G0815375700.01.T05 | OBG-type G domain-containing protein                         |
| maker-8-augustus-gene-58.16-mRNA-1 | Japonica | NA       |               |              |                          | S-type anion channel SLAH2 isoform X1                        |
| maker-8-augustus-gene-58.18-mRNA-1 | Japonica | NA       |               | Os08g0199400 | OsR498G0815376000.01.T01 | Acyl-[acyl-carrier-protein] desaturase                       |
| maker-8-augustus-gene-58.2-mRNA-1  | Japonica | NA       |               |              | OsR498G0815372700.01.T02 | F-box domain-containing protein (Fragment)                   |
| maker-8-augustus-gene-58.7-mRNA-1  | Japonica | NA       |               |              | OsR498G0815373500.01.T06 | F-box domain-containing protein                              |
| maker-8-augustus-gene-59.13-mRNA-1 | Japonica | NA       |               | Os08g0200600 | OsR498G0815382000.01.T01 | NAC transcription factor                                     |
| maker-8-augustus-gene-59.2-mRNA-1  | Japonica | NA       |               | Os08g0200100 | OsR498G0815379800.01.T01 | Acyl-(Acyl-carrier-protein) desaturase, chloroplastic        |
| maker-8-augustus-gene-59.6-mRNA-1  | Japonica | NA       |               | Os08g0200300 | OsR498G0815380800.01.T01 | Photosystem II 10 kDa polypeptide, chloroplastic             |
| maker-8-augustus-gene-59.8-mRNA-1  | Japonica | Indica   |               | Os08g0200400 | OsR498G0815381000.01.T03 | RNA-binding KH domain-containing protein                     |
| maker-8-augustus-gene-6.30-mRNA-1  | Japonica | NA       |               | Os08g0110500 | OsR498G0815055900.01.T01 | RING-type E3 ubiquitin transferase                           |
| maker-8-augustus-gene-6.32-mRNA-1  | Japonica | Indica   |               | Os08g0110800 | OsR498G0815056700.01.T01 | Far upstream element-binding protein 1                       |
| maker-8-augustus-gene-6.36-mRNA-1  | Japonica | NA       |               | Os08g0109900 | OsR498G0815053400.01.T03 | Survival motor neuron                                        |
| maker-8-augustus-gene-6.42-mRNA-1  | Japonica | NA       |               | Os08g0110000 | OsR498G0815053800.01.T01 | Methylesterase 12, chloroplastic                             |
| maker-8-augustus-gene-6.46-mRNA-1  | Japonica | NA       |               | Os08g0110400 | OsR498G0815055800.01.T02 | Peroxisomal protein, mitochondrial                           |
| maker-8-augustus-gene-6.48-mRNA-1  | Japonica | NA       |               | Os08g0110600 | OsR498G0815056400.01.T01 |                                                              |
| maker-8-augustus-gene-6.50-mRNA-1  | Japonica | NA       |               | Os08g0110700 | OsR498G0815056600.01.T04 | Phospholipase SGR2                                           |
| maker-8-augustus-gene-6.55-mRNA-1  | Japonica | NA       |               | Os08g0111200 | OsR498G0815057200.01.T01 | Non-lysosomal glucosylceramidase                             |
| maker-8-augustus-gene-60.1-mRNA-1  | Japonica | Japonica | Kinase-LRR-TM | Os08g0201700 | OsR498G0815383300.01.T05 | Non-specific serine/threonine protein kinase                 |
| maker-8-augustus-gene-60.12-mRNA-1 | Japonica | NA       | NBS-TM        | Os08g0202400 | OsR498G0815386000.01.T02 | NB-ARC domain-containing protein                             |
| maker-8-augustus-gene-61.24-mRNA-1 | Japonica | NA       | Kinase-LRR-TM |              |                          | Non-specific serine/threonine protein kinase                 |
| maker-8-augustus-gene-61.30-mRNA-1 | Japonica | NA       | Kinase-LRR-TM | Os08g0203300 | OsR498G0815386700.01.T02 | Non-specific serine/threonine protein kinase                 |
| maker-8-augustus-gene-61.36-mRNA-1 | Japonica | NA       | Kinase-LRR-TM |              |                          | Putative Receptor-like serine/threonine kinase(RFK1)         |
| maker-8-augustus-gene-61.45-mRNA-1 | Japonica | Indica   | Kinase-LRR-TM | Os08g0203400 | OsR498G0815387700.01.T03 | Non-specific serine/threonine protein kinase                 |
| maker-8-augustus-gene-61.50-mRNA-1 | Japonica | NA       | Kinase-LRR-TM | Os08g0203700 | OsR498G0815387900.01.T03 | Non-specific serine/threonine protein kinase                 |
| maker-8-augustus-gene-62.0-mRNA-1  | Japonica | NA       |               | Os08g0204632 | OsR498G0306965200.01.T01 | SANT domain-containing protein (Fragment)                    |
| maker-8-augustus-gene-62.2-mRNA-1  | Japonica | NA       |               | Os08g0204800 | OsR498G0815389800.01.T01 | AUGMIN subunit 2                                             |
| maker-8-augustus-gene-63.0-mRNA-1  | Japonica | Japonica | CC-NBS-TM     | Os08g0205100 | OsR498G0815390700.01.T01 | CC-NBS-LRR type disease resistance protein NLR1-V            |
| maker-8-augustus-gene-63.1-mRNA-1  | Japonica | NA       | CC-NBS-TM     | Os08g0205150 | OsR498G0815390700.01.T02 | CC-NBS-LRR type disease resistance protein NLR1-V            |
| maker-8-augustus-gene-63.12-mRNA-1 | Japonica | Indica   |               | Os04g0613900 | OsR498G0815397300.01.T01 | Potassium transporter                                        |
| maker-8-augustus-gene-63.17-mRNA-1 | Japonica | NA       |               | Os08g0206600 | OsR498G0815398700.01.T02 | AICAR transformylase                                         |
| maker-8-augustus-gene-63.22-mRNA-1 | Japonica | NA       |               | Os08g0205200 | OsR498G0815393200.01.T01 | Equilibrative nucleotide transporter like                    |
| maker-8-augustus-gene-63.24-mRNA-1 | Japonica | NA       |               | Os08g0205900 | OsR498G0815394600.01.T02 | gamma aminobutyrate transaminase 3, chloroplastic isoform X2 |
| maker-8-augustus-gene-63.29-mRNA-1 | Japonica | Japonica |               | Os08g0206500 | OsR498G0815397600.01.T01 | Nuclear transcription factor Y subunit C                     |
| maker-8-augustus-gene-63.7-mRNA-1  | Japonica | Indica   |               | Os08g0205400 | OsR498G0815393700.01.T01 | HMA domain-containing protein (Fragment)                     |
| maker-8-augustus-gene-63.9-mRNA-1  | Japonica | NA       |               |              | OsR498G0815394100.01.T01 | Cysteine-rich transmembrane CYSTM domain                     |
| maker-8-augustus-gene-64.42-mRNA-1 | Japonica | NA       |               |              | OsR498G0815398900.01.T03 | MBD domain-containing protein                                |
| maker-8-augustus-gene-64.47-mRNA-1 | Japonica | NA       |               | Os08g0206900 | OsR498G0815399300.01.T02 | UDP-N-acetylglucosamine diphosphorylase 1                    |
| maker-8-augustus-gene-64.53-mRNA-1 | Japonica | NA       |               | Os08g0207500 | OsR498G0815402500.01.T01 | Zinc transporter ZIP                                         |
| maker-8-augustus-gene-64.61-mRNA-1 | Japonica | NA       |               |              |                          |                                                              |
| maker-8-augustus-gene-64.62-mRNA-1 | Japonica | NA       |               |              | OsR498G0815399600.01.T01 | Pectinesterase                                               |
| maker-8-augustus-gene-64.64-mRNA-1 | Japonica | Indica   |               | Os04g0613600 | OsR498G0815400000.01.T01 | 40S ribosomal protein S11                                    |
| maker-8-augustus-gene-64.69-mRNA-1 | Japonica | NA       |               |              | OsR498G0815409000.01.T01 | Peptidase A1 domain-containing protein                       |
| maker-8-augustus-gene-65.0-mRNA-1  | Japonica | NA       |               | Os03g0424600 |                          | Zinc finger BED domain-containing protein RICESLEEPER 2      |
| maker-8-augustus-gene-7.33-mRNA-1  | Japonica | Japonica |               | Os08g0112000 | OsR498G0815059100.01.T01 | ATP-dependent DNA helicase                                   |
| maker-8-augustus-gene-7.34-mRNA-1  | Japonica | NA       |               |              |                          | ATP-dependent DNA helicase                                   |
| maker-8-augustus-gene-7.41-mRNA-1  | Japonica | NA       |               | Os08g0112600 | OsR498G0815061500.01.T01 | Zinc finger and BTB domain-containing protein 11 isoform 1   |
| maker-8-augustus-gene-7.44-mRNA-1  | Japonica | NA       |               | Os08g0112700 | OsR498G0815061700.01.T01 | MADS-box transcription factor                                |
| maker-8-augustus-gene-7.47-mRNA-1  | Japonica | NA       |               | Os08g0112900 | OsR498G0815062300.01.T01 | Zinc finger protein, putative isoform 1                      |
| maker-8-augustus-gene-7.50-mRNA-1  | Japonica | NA       |               | Os08g0113100 | OsR498G0815062900.01.T01 | Carbohydrate kinase PfkB                                     |
| maker-8-augustus-gene-7.53-mRNA-1  | Japonica | NA       | CC-Kinase-TM  | Os08g0112500 | OsR498G0815061000.01.T02 | Putative serine/threonine-protein kinase                     |
| maker-8-augustus-gene-7.57-mRNA-1  | Japonica | NA       |               | Os08g0112800 | OsR498G0815062200.01.T01 | Succinate dehydrogenase subunit 6 mitochondrial              |
| maker-8-augustus-gene-72.29-mRNA-1 | Japonica | NA       |               | Os08g0216900 | OsR498G0815426000.01.T02 |                                                              |
| maker-8-augustus-gene-74.0-mRNA-1  | Japonica | NA       |               |              | OsR498G0101916300.01.T01 |                                                              |
| maker-8-augustus-gene-74.2-mRNA-1  | Japonica | NA       |               | Os08g0222100 | OsR498G0815443000.01.T01 |                                                              |
| maker-8-augustus-gene-75.0-mRNA-1  | Japonica | NA       |               |              | OsR498G0815444300.01.T05 |                                                              |
| maker-8-augustus-gene-75.2-mRNA-1  | Japonica | NA       |               | Os08g0220600 | OsR498G0815444300.01.T03 | Vernalization insensitive 3                                  |
| maker-8-augustus-gene-78.0-mRNA-1  | Japonica | Indica   |               | Os08g0223700 | OsR498G0815457900.01.T06 | PHD-type domain-containing protein (Fragment)                |
| maker-8-augustus-gene-78.1-mRNA-1  | Japonica | NA       |               |              |                          | PHD-type domain-containing protein (Fragment)                |
| maker-8-augustus-gene-78.2-mRNA-1  | Japonica | NA       |               | Os08g0223700 |                          | PHD-type domain-containing protein                           |

|                                    |          |          |               |              |                          |                                                                            |
|------------------------------------|----------|----------|---------------|--------------|--------------------------|----------------------------------------------------------------------------|
| maker-8-augustus-gene-79.30-mRNA-1 | Japonica | NA       |               | Os08g0223900 | OsR498G0815461300.01.T05 | Terpene cyclase/mutase family member                                       |
| maker-8-augustus-gene-79.35-mRNA-1 | Japonica | NA       | Kinase-TM     | Os08g0224100 | OsR498G0815462500.01.T01 | serine/threonine-protein kinase STY13                                      |
| maker-8-augustus-gene-79.37-mRNA-1 | Japonica | NA       |               | Os08g0224500 | OsR498G0815464100.01.T01 | Glucan endo-1,3-beta-D-glucosidase                                         |
| maker-8-augustus-gene-79.39-mRNA-1 | Japonica | NA       |               | Os08g0224700 | OsR498G0815464500.01.T01 | 26S proteasome non-ATPase regulatory subunit 1 homolog                     |
| maker-8-augustus-gene-79.45-mRNA-1 | Japonica | NA       |               | Os10g0387000 | OsR498G0815465100.01.T01 | Ethanolamine-phosphate cytidylyltransferase-like                           |
| maker-8-augustus-gene-79.51-mRNA-1 | Japonica | NA       |               | Os08g0224200 | OsR498G0815462800.01.T01 | YTH domain-containing family protein 1                                     |
| maker-8-augustus-gene-79.56-mRNA-1 | Japonica | NA       |               |              | OsR498G0815463200.01.T01 | proton extrusion protein PcxA isoform X2                                   |
| maker-8-augustus-gene-79.61-mRNA-1 | Japonica | NA       |               | Os08g0224900 | OsR498G0815465600.01.T01 | (3R)-hydroxymyristoyl-[acyl-carrier-protein] dehydratase                   |
| maker-8-augustus-gene-8.0-mRNA-1   | Japonica | NA       |               |              | OsR498G0815063500.01.T01 | E3 ubiquitin-protein ligase CHIP                                           |
| maker-8-augustus-gene-8.14-mRNA-1  | Japonica | NA       |               | Os08g0113200 | OsR498G0815063200.01.T03 | EMBRYO DEFECTIVE 140                                                       |
| maker-8-augustus-gene-80.0-mRNA-1  | Japonica | NA       |               | Os08g0225400 | OsR498G0815470300.01.T01 | Core-2/l-branching beta-1,6-N-acetylglucosaminyltransferase family protein |
| maker-8-augustus-gene-80.2-mRNA-1  | Japonica | Japonica |               | Os08g0226300 | OsR498G0815473200.01.T01 | Cytochrome P450 family 76 subfamily C polypeptide 7                        |
| maker-8-augustus-gene-81.32-mRNA-1 | Japonica | Japonica |               | Os08g0226800 | OsR498G0815471800.01.T01 | BTB/POZ and MATH domain-containing protein 2                               |
| maker-8-augustus-gene-81.34-mRNA-1 | Japonica | NA       |               |              | OsR498G0815474400.01.T01 | F-box domain-containing protein (Fragment)                                 |
| maker-8-augustus-gene-82.29-mRNA-1 | Japonica | Japonica |               | Os08g0228200 | OsR498G0815481500.01.T01 | BTB/POZ and MATH domain-containing protein 2                               |
| maker-8-augustus-gene-83.38-mRNA-1 | Japonica | NA       |               |              | OsR498G0816107200.01.T03 |                                                                            |
| maker-8-augustus-gene-83.40-mRNA-1 | Japonica | NA       | CC-Kinase-TM  | Os08g0230800 |                          | Non-specific serine/threonine protein kinase                               |
| maker-8-augustus-gene-83.42-mRNA-1 | Japonica | Japonica |               | Os08g0230300 | OsR498G0815485200.01.T03 | F-box/kelch-repeat protein At1g51550                                       |
| maker-8-augustus-gene-83.46-mRNA-1 | Japonica | NA       |               | Os08g0231400 | OsR498G0815489200.01.T01 | Germin-like protein 8-3                                                    |
| maker-8-augustus-gene-84.0-mRNA-1  | Japonica | NA       |               | Os02g0494400 |                          | Putative ribosomal RNA apurinic site specific lyase                        |
| maker-8-augustus-gene-85.10-mRNA-1 | Japonica | Indica   | NBS-TM        | Os08g0236600 | OsR498G0815501900.01.T01 | NB-ARC domain-containing protein                                           |
| maker-8-augustus-gene-85.14-mRNA-1 | Japonica | Indica   |               | Os08g0236900 | OsR498G0815500400.01.T02 |                                                                            |
| maker-8-augustus-gene-85.4-mRNA-1  | Japonica | Japonica |               | Os08g0235400 | OsR498G0815500900.01.T01 | Ubiquitinyl hydrolase 1                                                    |
| maker-8-augustus-gene-85.5-mRNA-1  | Japonica | NA       |               | Os08g0235400 | OsR498G0815500900.01.T01 | U-box domain-containing protein                                            |
| maker-8-augustus-gene-86.0-mRNA-1  | Japonica | NA       |               | Os08g0236700 | OsR498G0815503500.01.T01 | YqaJ viral recombinase                                                     |
| maker-8-augustus-gene-87.0-mRNA-1  | Japonica | NA       |               | Os08g0238200 | OsR498G1119807900.01.T01 | DLH domain-containing protein                                              |
| maker-8-augustus-gene-87.18-mRNA-1 | Japonica | NA       |               | Os01g0847200 | OsR498G0102328500.01.T02 | Mannose-1-phosphate guanylyltransferase 1                                  |
| maker-8-augustus-gene-87.21-mRNA-1 | Japonica | NA       |               |              |                          |                                                                            |
| maker-8-augustus-gene-87.23-mRNA-1 | Japonica | NA       |               |              | OsR498G0407881700.01.T01 | Transposon protein, putative, Mutator sub-class, expressed                 |
| maker-8-augustus-gene-87.24-mRNA-1 | Japonica | Japonica |               | Os08g0237800 | OsR498G0815508800.01.T01 | Xyloglucan endotransglucosylase/hydrolase                                  |
| maker-8-augustus-gene-88.51-mRNA-1 | Japonica | Japonica |               | Os08g0239900 | OsR498G0815510900.01.T01 | Sulfotransferase                                                           |
| maker-8-augustus-gene-88.52-mRNA-1 | Japonica | Japonica |               | Os08g0239900 | OsR498G0815510900.01.T01 | Sulfotransferase                                                           |
| maker-8-augustus-gene-88.57-mRNA-1 | Japonica | NA       |               | Os08g0240533 | OsR498G0815511900.01.T02 | Xyloglucan endotransglucosylase/hydrolase                                  |
| maker-8-augustus-gene-88.61-mRNA-1 | Japonica | Japonica |               | Os08g0240000 | OsR498G0815510900.01.T01 | Sulfotransferase                                                           |
| maker-8-augustus-gene-88.63-mRNA-1 | Japonica | NA       |               | Os08g0240600 | OsR498G0815512600.01.T01 | AUGMIN subunit 1                                                           |
| maker-8-augustus-gene-89.0-mRNA-1  | Japonica | NA       |               | Os08g0240800 | OsR498G0815512900.01.T05 | Villin-4                                                                   |
| maker-8-augustus-gene-89.12-mRNA-1 | Japonica | Indica   |               | Os04g0658000 | OsR498G0815516200.01.T02 | Glucose-6-phosphate 1-epimerase                                            |
| maker-8-augustus-gene-89.7-mRNA-1  | Japonica | Japonica |               | Os08g0241300 | OsR498G0409229200.01.T06 |                                                                            |
| maker-8-augustus-gene-89.9-mRNA-1  | Japonica | NA       |               | Os08g0241400 | OsR498G0815515100.01.T04 | E3 ubiquitin-protein ligase MBR2                                           |
| maker-8-augustus-gene-90.0-mRNA-1  | Japonica | NA       |               | Os08g0242800 | OsR498G0815521100.01.T01 | RNA polymerase sigma factor rpoD                                           |
| maker-8-augustus-gene-90.12-mRNA-1 | Japonica | NA       |               | Os08g0242400 | OsR498G0815519200.01.T01 | Homeobox domain                                                            |
| maker-8-augustus-gene-90.14-mRNA-1 | Japonica | NA       |               |              | OsR498G0815520600.01.T02 | ACT domain-containing protein DS12                                         |
| maker-8-augustus-gene-90.18-mRNA-1 | Japonica | NA       |               | Os08g0242900 | OsR498G0815521400.01.T03 | Afadin-and alpha-actinin-binding protein                                   |
| maker-8-augustus-gene-90.4-mRNA-1  | Japonica | NA       |               | Os08g0243100 | OsR498G0815521900.01.T04 | ACPS domain-containing protein (Fragment)                                  |
| maker-8-augustus-gene-91.0-mRNA-1  | Japonica | NA       |               | Os08g0243500 | OsR498G0815523900.01.T01 | NADPH--cytochrome P450 reductase                                           |
| maker-8-augustus-gene-91.16-mRNA-1 | Japonica | Indica   |               | Os06g0255700 | OsR498G0815525200.01.T02 | Protein CHROMATIN REMODELING 35                                            |
| maker-8-augustus-gene-91.18-mRNA-1 | Japonica | NA       |               | Os08g0244100 | OsR498G0815525400.01.T01 | Syntaxin/t-SNARE family protein, putative isoform 1                        |
| maker-8-augustus-gene-91.20-mRNA-1 | Japonica | NA       |               |              | OsR498G0815526000.01.T04 | SET domain-containing protein (Fragment)                                   |
| maker-8-augustus-gene-92.0-mRNA-1  | Japonica | NA       |               | Os08g0245200 | OsR498G0815527100.01.T01 | 4-coumarate coenzyme A ligase                                              |
| maker-8-augustus-gene-92.16-mRNA-1 | Japonica | NA       | NBS           |              |                          | Resistance protein PSH-RGH6                                                |
| maker-8-augustus-gene-92.2-mRNA-1  | Japonica | NA       |               | Os08g0245400 | OsR498G0815527400.01.T01 | Bifunctional dethiobiotin synthetase/7,8-diamino-pelargonic acid aminotran |
| maker-8-augustus-gene-92.8-mRNA-1  | Japonica | NA       | CC-NBS        |              | OsR498G0815527800.01.T03 | Disease resistance protein RPP13                                           |
| maker-8-augustus-gene-93.0-mRNA-1  | Japonica | NA       |               | Os08g0246400 | OsR498G0815530900.01.T02 | Cytochrome b-c1 complex subunit 7                                          |
| maker-8-augustus-gene-93.2-mRNA-1  | Japonica | NA       |               | Os08g0246800 |                          |                                                                            |
| maker-8-augustus-gene-93.4-mRNA-1  | Japonica | NA       |               |              |                          |                                                                            |
| maker-8-augustus-gene-93.6-mRNA-1  | Japonica | NA       | Kinase-LRR-TM | Os08g0248100 | OsR498G0815535500.01.T02 | Putative LRR receptor-like serine/threonine-protein kinase                 |
| maker-8-augustus-gene-93.7-mRNA-1  | Japonica | NA       | Kinase-LRR-TM | Os08g0248100 | OsR498G0815535500.01.T02 | Putative LRR receptor-like serine/threonine-protein kinase                 |
| maker-8-augustus-gene-93.8-mRNA-1  | Japonica | Japonica | Kinase-LRR-TM | Os08g0248100 | OsR498G0815535700.01.T01 | Receptor kinase                                                            |
| maker-8-augustus-gene-94.23-mRNA-1 | Japonica | NA       |               | Os08g0248700 | OsR498G0815537500.01.T01 | Transcription factor like                                                  |
| maker-8-augustus-gene-94.26-mRNA-1 | Japonica | NA       |               | Os08g0248900 | OsR498G0815538100.01.T05 | ADP-ribosylation factor                                                    |
| maker-8-augustus-gene-94.34-mRNA-1 | Japonica | NA       |               | Os08g0248800 | OsR498G0815537800.01.T01 | Aspartate carbamoyltransferase                                             |

|                                     |          |          |               |               |                          |                                                                            |
|-------------------------------------|----------|----------|---------------|---------------|--------------------------|----------------------------------------------------------------------------|
| maker-8-augustus-gene-95.10-mRNA-1  | Japonica | NA       |               | Os08g0250900  | OsR498G0815549800.01.T01 | Protein SUPPRESSOR OF like                                                 |
| maker-8-augustus-gene-97.0-mRNA-1   | Japonica | NA       |               | Os08g0254900  | OsR498G0815559700.01.T01 | Glutamyl-tRNA reductase-binding protein chloroplastic                      |
| maker-8-augustus-gene-98.27-mRNA-1  | Japonica | NA       |               |               | OsR498G0815564400.01.T03 |                                                                            |
| maker-8-augustus-gene-99.0-mRNA-1   | Japonica | NA       |               | Os08g0258200  | OsR498G0815565000.01.T02 | Probable E3 ubiquitin-protein ligase XBOS35                                |
| maker-9-augustus-gene-10.0-mRNA-1   | Japonica | NA       |               | Os09g01110400 | OsR498G0916674500.01.T03 | DNA-directed RNA polymerases II, IV and V subunit 3 like                   |
| maker-9-augustus-gene-10.2-mRNA-1   | Japonica | NA       |               |               | OsR498G0612413700.01.T01 |                                                                            |
| maker-9-augustus-gene-10.4-mRNA-1   | Japonica | NA       |               | Os09g01111100 | OsR498G0916678000.01.T01 | Cyclin N-terminal domain-containing protein                                |
| maker-9-augustus-gene-10.6-mRNA-1   | Japonica | NA       |               | Os09g01111800 | OsR498G0916679400.01.T02 | RRM domain-containing protein (Fragment)                                   |
| maker-9-augustus-gene-10.9-mRNA-1   | Japonica | NA       |               | Os09g0112400  | OsR498G0916681000.01.T01 | DNA-directed RNA polymerase subunit                                        |
| maker-9-augustus-gene-102.30-mRNA-1 | Japonica | Indica   |               | Os01g0609066  | OsR498G0917178000.01.T01 | Pleiotropic drug resistance protein 4                                      |
| maker-9-augustus-gene-102.31-mRNA-1 | Japonica | NA       |               |               | OsR498G0917179000.01.T01 | ABC transporter domain containing protein,expressed                        |
| maker-9-augustus-gene-104.0-mRNA-1  | Japonica | NA       | Kinase-TM     |               |                          | Senescence-induced receptor-like serine/threonine-protein kinase           |
| maker-9-augustus-gene-104.4-mRNA-1  | Japonica | NA       |               | Os09g0354501  | OsR498G0917230700.01.T01 | Fe2OG dioxygenase domain-containing protein                                |
| maker-9-augustus-gene-104.5-mRNA-1  | Japonica | NA       |               | Os09g0353700  | OsR498G0917230300.01.T01 | S-norocclaurine synthase 1                                                 |
| maker-9-augustus-gene-105.27-mRNA-1 | Japonica | Indica   | Kinase-LRR-TM | Os09g0353200  | OsR498G0917227800.01.T02 | Putative LRR receptor-like serine/threonine-protein kinase                 |
| maker-9-augustus-gene-105.30-mRNA-1 | Japonica | NA       |               | Os09g0352400  | OsR498G0917225800.01.T02 | Bystin isoform B                                                           |
| maker-9-augustus-gene-105.36-mRNA-1 | Japonica | Japonica | Kinase-LRR-TM | Os09g0352000  | OsR498G0917223000.01.T02 | Putative leucine-rich repeat receptor-like serine/threonine-protein kinase |
| maker-9-augustus-gene-106.25-mRNA-1 | Japonica | NA       | Kinase-LRR-TM | Os09g0351700  |                          | Serine/threonine-specific receptor protein kinase-like                     |
| maker-9-augustus-gene-106.28-mRNA-1 | Japonica | NA       | Kinase-LRR-TM | Os09g0350900  | OsR498G0917219200.01.T02 | Serine/threonine-specific receptor protein kinase-like                     |
| maker-9-augustus-gene-107.14-mRNA-1 | Japonica | NA       | Kinase-TM     | Os09g0349600  |                          | Putative LRR receptor-like serine/threonine-protein kinase                 |
| maker-9-augustus-gene-107.2-mRNA-1  | Japonica | Indica   | Kinase-LRR-TM | Os09g0352000  | OsR498G0917216200.01.T01 | Serine/threonine-specific receptor protein kinase-like                     |
| maker-9-augustus-gene-107.4-mRNA-1  | Japonica | Japonica | Kinase-LRR-TM | Os09g0349800  | OsR498G0917216200.01.T01 | Putative LRR receptor-like serine/threonine-protein kinase                 |
| maker-9-augustus-gene-108.40-mRNA-1 | Japonica | NA       |               | Os09g0348800  |                          | Transposon protein, putative, CACTA, En/Spm sub-class, expressed           |
| maker-9-augustus-gene-108.43-mRNA-1 | Japonica | Indica   |               | Os02g0814900  | OsR498G0917211800.01.T02 | Nicotinamide-nucleotide adenylyltransferase                                |
| maker-9-augustus-gene-108.51-mRNA-1 | Japonica | NA       |               | Os09g0347700  | OsR498G0917211200.01.T06 | Transport protein Sec61, alpha subunit                                     |
| maker-9-augustus-gene-108.52-mRNA-1 | Japonica | NA       |               | Os09g0347700  | OsR498G0917211200.01.T02 | Transport protein Sec61, alpha subunit                                     |
| maker-9-augustus-gene-108.67-mRNA-1 | Japonica | Indica   | Kinase-TM     | Os09g0348300  | OsR498G0917213300.01.T01 | Serine/threonine-specific receptor protein kinase-like                     |
| maker-9-augustus-gene-108.69-mRNA-1 | Japonica | Indica   | Kinase-TM     | Os09g0348300  | OsR498G0917213100.01.T01 | Serine/threonine-specific receptor protein kinase-like                     |
| maker-9-augustus-gene-108.73-mRNA-1 | Japonica | NA       |               | Os09g0348200  |                          | Protein kinase domain-containing protein (Fragment)                        |
| maker-9-augustus-gene-108.77-mRNA-1 | Japonica | NA       |               | Os09g0347800  | OsR498G0917211500.01.T01 | Histone acetyltransferase type B catalytic subunit                         |
| maker-9-augustus-gene-109.0-mRNA-1  | Japonica | NA       |               |               |                          | SAWADEE domain-containing protein                                          |
| maker-9-augustus-gene-109.13-mRNA-1 | Japonica | NA       |               | Os09g0345700  | OsR498G0917205400.01.T02 | NADH kinase                                                                |
| maker-9-augustus-gene-109.20-mRNA-1 | Japonica | NA       |               | Os09g0345500  | OsR498G0917204700.01.T01 | SHSP domain-containing protein (Fragment)                                  |
| maker-9-augustus-gene-109.22-mRNA-1 | Japonica | NA       | Kinase-LRR-TM |               |                          | Leucine rich repeat malectin kinase 1                                      |
| maker-9-augustus-gene-109.5-mRNA-1  | Japonica | NA       |               | Os09g0346700  | OsR498G0917208000.01.T02 | Retinol dehydrogenase 13                                                   |
| maker-9-augustus-gene-110.0-mRNA-1  | Japonica | NA       |               | Os09g0345000  | OsR498G0917203400.01.T02 | UBD domain-containing protein                                              |
| maker-9-augustus-gene-110.10-mRNA-1 | Japonica | NA       |               | Os09g0344800  | OsR498G0917202900.01.T05 | Putative transmembrane protein TauE                                        |
| maker-9-augustus-gene-110.2-mRNA-1  | Japonica | Japonica |               | Os09g0344500  | OsR498G0917201600.01.T01 | O-methyltransferase ZRP4                                                   |
| maker-9-augustus-gene-110.4-mRNA-1  | Japonica | NA       | Kinase-TM     |               |                          | L-type lectin-domain containing receptor kinase IX.1                       |
| maker-9-augustus-gene-110.6-mRNA-1  | Japonica | NA       |               |               | OsR498G0917198600.01.T06 | Protein kinase domain-containing protein                                   |
| maker-9-augustus-gene-110.8-mRNA-1  | Japonica | NA       |               | Os09g0344900  | OsR498G0917203100.01.T03 | Sulfite exporter TauE/Safe family protein 3                                |
| maker-9-augustus-gene-111.31-mRNA-1 | Japonica | Japonica | Kinase        | Os09g0341100  | OsR498G0917196300.01.T01 | L-type lectin-domain containing receptor kinase IX.1                       |
| maker-9-augustus-gene-114.0-mRNA-1  | Japonica | Japonica |               | Os09g0334900  | OsR498G0917183000.01.T01 | Ankyrin repeat domain-containing protein 6                                 |
| maker-9-augustus-gene-114.2-mRNA-1  | Japonica | NA       | Kinase-TM     |               | OsR498G0917185900.01.T01 | Clade XIV lectin receptor kinase                                           |
| maker-9-augustus-gene-114.3-mRNA-1  | Japonica | NA       | Kinase-TM     | Os09g0334800  | OsR498G0917182700.01.T01 | L-type lectin-domain containing receptor kinase IX.1                       |
| maker-9-augustus-gene-115.0-mRNA-1  | Japonica | NA       | Kinase-LRR-TM | Os09g0335400  |                          | Senescence-induced receptor-like serine/threonine-protein kinase           |
| maker-9-augustus-gene-115.2-mRNA-1  | Japonica | NA       | Kinase-TM     |               |                          | Serine/threonine-specific receptor protein kinase-like                     |
| maker-9-augustus-gene-115.4-mRNA-1  | Japonica | NA       |               | Os09g0334500  | OsR498G0917182100.01.T01 | WRKY transcription factor                                                  |
| maker-9-augustus-gene-115.7-mRNA-1  | Japonica | Indica   | Kinase-LRR-TM | Os09g0352000  | OsR498G0917236000.01.T01 | Putative leucine-rich repeat receptor-like serine/threonine-protein kinase |
| maker-9-augustus-gene-116.0-mRNA-1  | Japonica | Japonica | Kinase-TM     | Os09g0356200  | OsR498G0917236300.01.T05 | Putative LRR receptor-like serine/threonine-protein kinase                 |
| maker-9-augustus-gene-116.3-mRNA-1  | Japonica | NA       |               |               | OsR498G0917236800.01.T01 |                                                                            |
| maker-9-augustus-gene-116.5-mRNA-1  | Japonica | Japonica | Kinase-LRR-TM | Os09g0356800  | OsR498G0917239000.01.T01 | Leucine-rich repeat protein kinase-like                                    |
| maker-9-augustus-gene-116.6-mRNA-1  | Japonica | Japonica |               | Os09g0356800  | OsR498G0917239000.01.T02 | Putative LRR receptor-like serine/threonine-protein kinase                 |
| maker-9-augustus-gene-117.0-mRNA-1  | Japonica | NA       | Kinase-LRR-TM | Os09g0356800  | OsR498G0917239000.01.T02 | Putative LRR receptor-like serine/threonine-protein kinase                 |
| maker-9-augustus-gene-117.3-mRNA-1  | Japonica | Indica   | Kinase-TM     | Os09g0356800  | OsR498G0917240400.01.T05 | Protein kinase domain-containing protein                                   |
| maker-9-augustus-gene-118.12-mRNA-1 | Japonica | NA       |               | Os09g0360400  | OsR498G0917243500.01.T04 | Holocarboxylase synthetase                                                 |
| maker-9-augustus-gene-118.15-mRNA-1 | Japonica | NA       |               | Os09g0359800  | OsR498G0917242800.01.T02 | Arginine methyltransferase 11                                              |
| maker-9-augustus-gene-118.20-mRNA-1 | Japonica | NA       |               | Os09g0360500  | OsR498G0917243800.01.T01 | Very-long-chain 3-oxoacyl-CoA synthase                                     |
| maker-9-augustus-gene-118.6-mRNA-1  | Japonica | Japonica |               | Os09g0359700  | OsR498G0917242500.01.T01 | t-SNARE coiled-coil homology domain-containing protein                     |
| maker-9-augustus-gene-118.9-mRNA-1  | Japonica | NA       |               | Os09g0359900  | OsR498G0917242900.01.T01 | Nicotinamide N-methyltransferase-like protein                              |
| maker-9-augustus-gene-119.0-mRNA-1  | Japonica | Indica   |               | Os08g0398300  | OsR498G0917245500.01.T05 | ABC transporter A family member 7                                          |

|                                     |          |        |               |              |                          |                                                                                |
|-------------------------------------|----------|--------|---------------|--------------|--------------------------|--------------------------------------------------------------------------------|
| maker-9-augustus-gene-119.10-mRNA-1 | Japonica | NA     |               | Os09g0361200 | OsR498G0917246300.01.T01 | Hypersensitive induced reaction protein 2                                      |
| maker-9-augustus-gene-119.15-mRNA-1 | Japonica | NA     |               |              | OsR498G0917247300.01.T04 | Isochorismate synthase 2 chloroplastic                                         |
| maker-9-augustus-gene-119.20-mRNA-1 | Japonica | NA     |               |              | OsR498G0917248100.01.T01 |                                                                                |
| maker-9-augustus-gene-119.28-mRNA-1 | Japonica | NA     |               | Os09g0361300 | OsR498G0917246600.01.T01 | F-box/SPRY domain-containing protein 1 (Fragment)                              |
| maker-9-augustus-gene-119.30-mRNA-1 | Japonica | NA     |               |              |                          | Mitochondrial distribution/morphology family 35/apoptosis                      |
| maker-9-augustus-gene-119.5-mRNA-1  | Japonica | Indica | Kinase        | Os09g0361100 | OsR498G0917245900.01.T01 | Putative serine/threonine-protein kinase PIX7                                  |
| maker-9-augustus-gene-12.0-mRNA-1   | Japonica | NA     |               | Os09g0114500 | OsR498G0916689300.01.T01 | Kinesin-like protein KIN-4A                                                    |
| maker-9-augustus-gene-120.37-mRNA-1 | Japonica | NA     |               |              |                          | Aminopeptidase                                                                 |
| maker-9-augustus-gene-120.40-mRNA-1 | Japonica | NA     |               | Os09g0362900 | OsR498G0917250300.01.T01 | Histone-lysine N-methyltransferase, H3 lysine-9 specific SUVH5                 |
| maker-9-augustus-gene-120.42-mRNA-1 | Japonica | NA     |               | Os09g0363100 | OsR498G0917251300.01.T02 | CRS1 / YhbY domain-containing protein (Fragment)                               |
| maker-9-augustus-gene-120.46-mRNA-1 | Japonica | NA     |               |              |                          |                                                                                |
| maker-9-augustus-gene-120.50-mRNA-1 | Japonica | NA     |               | Os09g0363500 | OsR498G0917251900.01.T03 | Glucosidase 2 subunit beta like                                                |
| maker-9-augustus-gene-120.52-mRNA-1 | Japonica | Indica |               | Os09g0363800 | OsR498G0917252700.01.T01 | Metallo-hydrolase/oxidoreductase superfamily protein                           |
| maker-9-augustus-gene-120.62-mRNA-1 | Japonica | Indica |               | Os09g0363600 | OsR498G0917252200.01.T03 | THO complex subunit like                                                       |
| maker-9-augustus-gene-120.68-mRNA-1 | Japonica | NA     |               | Os09g0363700 | OsR498G0917252400.01.T01 | Enolase-phosphatase                                                            |
| maker-9-augustus-gene-120.70-mRNA-1 | Japonica | NA     |               | Os09g0363900 | OsR498G0917253000.01.T01 |                                                                                |
| maker-9-augustus-gene-121.0-mRNA-1  | Japonica | Indica |               | Os09g0364500 | OsR498G0917255300.01.T01 | GTP-binding protein BRASSINAZOLE INSENSITIVE PALE GREEN 2 like                 |
| maker-9-augustus-gene-121.4-mRNA-1  | Japonica | NA     |               | Os09g0364900 |                          | 5-AMP-activated protein kinase                                                 |
| maker-9-augustus-gene-121.6-mRNA-1  | Japonica | Indica |               | Os09g0507300 | OsR498G0917260400.01.T01 | L-ascorbate oxidase                                                            |
| maker-9-augustus-gene-123.37-mRNA-1 | Japonica | NA     |               |              | OsR498G0917274700.01.T01 | RNA-binding CRS1 / YhbY domain protein isoform 1                               |
| maker-9-augustus-gene-123.39-mRNA-1 | Japonica | NA     |               |              | OsR498G0917274900.01.T01 | Leucine zipper protein-like                                                    |
| maker-9-augustus-gene-123.46-mRNA-1 | Japonica | NA     |               | Os09g0368500 | OsR498G0917272200.01.T01 | Flavin containing polyamine oxidase                                            |
| maker-9-augustus-gene-123.47-mRNA-1 | Japonica | NA     |               | Os09g0368500 | OsR498G0917272200.01.T02 | Flavin containing polyamine oxidase                                            |
| maker-9-augustus-gene-124.37-mRNA-1 | Japonica | NA     |               |              |                          | F-box domain-containing protein                                                |
| maker-9-augustus-gene-124.39-mRNA-1 | Japonica | NA     |               | Os09g0370200 | OsR498G0917282000.01.T01 | Protein SCO1 homolog 2 mitochondrial                                           |
| maker-9-augustus-gene-125.0-mRNA-1  | Japonica | NA     |               | Os09g0371000 | OsR498G0917285100.01.T01 | MFS domain-containing protein (Fragment)                                       |
| maker-9-augustus-gene-125.13-mRNA-1 | Japonica | NA     |               |              | OsR498G0917287700.01.T01 | MND1-interacting protein 1                                                     |
| maker-9-augustus-gene-125.15-mRNA-1 | Japonica | NA     |               |              | OsR498G0917287900.01.T01 | Pumilio/Puf RNA-binding domain-containing protein-like                         |
| maker-9-augustus-gene-125.17-mRNA-1 | Japonica | Indica |               | Os09g0372400 | OsR498G0917289300.01.T01 | OCRE domain-containing protein                                                 |
| maker-9-augustus-gene-125.23-mRNA-1 | Japonica | Indica |               | Os02g0581300 | OsR498G0917291500.01.T02 | LAG1 longevity assurance homolog 3                                             |
| maker-9-augustus-gene-125.28-mRNA-1 | Japonica | NA     |               | Os09g0372800 | OsR498G0917291800.01.T05 | Non-specific serine/threonine protein kinase                                   |
| maker-9-augustus-gene-125.33-mRNA-1 | Japonica | NA     |               | Os09g0373000 | OsR498G0917292600.01.T01 | Mitochondrial pyruvate carrier                                                 |
| maker-9-augustus-gene-125.4-mRNA-1  | Japonica | NA     |               |              | OsR498G0917285900.01.T01 | MFS domain-containing protein (Fragment)                                       |
| maker-9-augustus-gene-125.7-mRNA-1  | Japonica | NA     |               | Os09g0371300 | OsR498G0917286300.01.T01 | MFS domain-containing protein (Fragment)                                       |
| maker-9-augustus-gene-125.8-mRNA-1  | Japonica | NA     |               | Os09g0371300 | OsR498G0917286300.01.T01 | MFS domain-containing protein (Fragment)                                       |
| maker-9-augustus-gene-126.39-mRNA-1 | Japonica | NA     |               | Os09g0373200 | OsR498G0917292900.01.T01 | Strictosidine synthase 3                                                       |
| maker-9-augustus-gene-126.43-mRNA-1 | Japonica | NA     |               | Os09g0374900 | OsR498G0917293900.01.T01 | Strictosidine synthase 3                                                       |
| maker-9-augustus-gene-126.45-mRNA-1 | Japonica | NA     |               |              | OsR498G0917294200.01.T01 | Phosphopyruvate hydratase                                                      |
| maker-9-augustus-gene-127.33-mRNA-1 | Japonica | NA     |               | Os09g0375900 | OsR498G0917296300.01.T01 | Hypoxia-responsive protein / zinc finger (C3HC4-type RING finger) protein-like |
| maker-9-augustus-gene-127.35-mRNA-1 | Japonica | NA     |               | Os09g0376300 | OsR498G0917298500.01.T01 | Protein kinase domain-containing protein                                       |
| maker-9-augustus-gene-127.37-mRNA-1 | Japonica | NA     | Kinase-LRR-TM | Os09g0376600 |                          | Nodulation receptor kinase                                                     |
| maker-9-augustus-gene-127.39-mRNA-1 | Japonica | Indica | Kinase-TM     | Os09g0375600 | OsR498G0917296000.01.T01 | Serine/threonine-protein kinase CDL1                                           |
| maker-9-augustus-gene-127.44-mRNA-1 | Japonica | NA     |               |              |                          | CST complex subunit CTC1                                                       |
| maker-9-augustus-gene-128.0-mRNA-1  | Japonica | NA     |               |              |                          | AMSH-like ubiquitin thioesterase 3                                             |
| maker-9-augustus-gene-128.2-mRNA-1  | Japonica | Indica |               | Os09g0376800 | OsR498G0917302000.01.T05 | Alpha, alpha-trehalose-phosphate synthase 6                                    |
| maker-9-augustus-gene-128.5-mRNA-1  | Japonica | NA     |               | Os09g0376900 | OsR498G0917303400.01.T02 | Potassium transporter                                                          |
| maker-9-augustus-gene-129.49-mRNA-1 | Japonica | Indica |               | Os09g0380200 | OsR498G0917314300.01.T01 | Protein CHAPERONE-LIKE PROTEIN OF POR1, chloroplastic-like                     |
| maker-9-augustus-gene-129.52-mRNA-1 | Japonica | Indica |               | Os09g0379600 | OsR498G0917312000.01.T01 | Class I homeodomain-leucine zipper protein 5                                   |
| maker-9-augustus-gene-13.35-mRNA-1  | Japonica | NA     |               | Os09g0115300 |                          | WYLD domain-containing protein                                                 |
| maker-9-augustus-gene-13.39-mRNA-1  | Japonica | NA     |               | Os09g0115400 | OsR498G0916691400.01.T02 | Polyadenylate-binding protein (Fragment)                                       |
| maker-9-augustus-gene-130.0-mRNA-1  | Japonica | NA     |               | Os09g0381100 | OsR498G0917320100.01.T01 | Nucleobase-ascorbate transporter 6                                             |
| maker-9-augustus-gene-130.13-mRNA-1 | Japonica | NA     |               | Os09g0381600 | OsR498G0917322700.01.T01 |                                                                                |
| maker-9-augustus-gene-130.15-mRNA-1 | Japonica | NA     |               |              | OsR498G0917315600.01.T02 |                                                                                |
| maker-9-augustus-gene-130.17-mRNA-1 | Japonica | NA     |               | Os09g0381400 | OsR498G0917321000.01.T01 | Fruit bromelain                                                                |
| maker-9-augustus-gene-130.5-mRNA-1  | Japonica | NA     |               |              | OsR498G0917320700.01.T01 | TF-B3 domain-containing protein                                                |
| maker-9-augustus-gene-131.0-mRNA-1  | Japonica | NA     | CC-Kinase-TM  | Os09g0383300 | OsR498G0917329300.01.T03 | Mitogen-activated protein kinase kinase kinase NPK1                            |
| maker-9-augustus-gene-131.12-mRNA-1 | Japonica | NA     |               |              |                          | BED-type domain-containing protein                                             |
| maker-9-augustus-gene-131.14-mRNA-1 | Japonica | NA     |               |              | OsR498G0917326800.01.T02 | Cyclin N-terminal domain-containing protein                                    |
| maker-9-augustus-gene-131.17-mRNA-1 | Japonica | NA     |               | Os09g0382500 | OsR498G0917327400.01.T01 | Succinate dehydrogenase subunit 7, mitochondrial                               |
| maker-9-augustus-gene-131.6-mRNA-1  | Japonica | NA     |               | Os09g0383400 | OsR498G0917329900.01.T01 | DEAD-box ATP-dependent RNA helicase                                            |
| maker-9-augustus-gene-133.40-mRNA-1 | Japonica | NA     |               | Os09g0386500 | OsR498G0917341700.01.T02 | Chromatin remodeling protein EBS                                               |

|                                     |          |          |  |              |                          |                                                                          |
|-------------------------------------|----------|----------|--|--------------|--------------------------|--------------------------------------------------------------------------|
| maker-9-augustus-gene-133.43-mRNA-1 | Japonica | NA       |  | Os09g0386400 | OsR498G0917341200.01.T02 | Enhanced ethylene response protein 5                                     |
| maker-9-augustus-gene-134.35-mRNA-1 | Japonica | NA       |  |              |                          | Endoribonuclease YBEY, chloroplastic                                     |
| maker-9-augustus-gene-135.31-mRNA-1 | Japonica | Japonica |  | Os09g0389000 | OsR498G0917355600.01.T01 | Mannose-6-phosphate isomerase                                            |
| maker-9-augustus-gene-137.0-mRNA-1  | Japonica | NA       |  |              | OsR498G0917365100.01.T01 | DUF295 domain-containing protein                                         |
| maker-9-augustus-gene-137.1-mRNA-1  | Japonica | NA       |  | Os09g0392000 | OsR498G0917367500.01.T01 | Zinc finger, MYND-type                                                   |
| maker-9-augustus-gene-137.15-mRNA-1 | Japonica | NA       |  |              |                          | Caffeic acid 3-O-methyltransferase                                       |
| maker-9-augustus-gene-137.17-mRNA-1 | Japonica | NA       |  | Os08g0381000 | OsR498G0713579700.01.T01 | Cell wall protein-like                                                   |
| maker-9-augustus-gene-137.19-mRNA-1 | Japonica | NA       |  | Os09g0394100 | OsR498G0917375400.01.T03 | Malonyl-CoA decarboxylase mitochondrial                                  |
| maker-9-augustus-gene-137.5-mRNA-1  | Japonica | NA       |  | Os09g0392100 | OsR498G0917367700.01.T01 | Enhanced disease susceptibility 1                                        |
| maker-9-augustus-gene-137.8-mRNA-1  | Japonica | NA       |  |              | OsR498G0917370900.01.T04 | JmjC domain-containing protein                                           |
| maker-9-augustus-gene-138.26-mRNA-1 | Japonica | NA       |  |              | OsR498G0917377700.01.T01 | Plastidic glucose transporter like                                       |
| maker-9-augustus-gene-138.32-mRNA-1 | Japonica | NA       |  | Os09g0394900 | OsR498G0917379500.01.T05 | Annexin                                                                  |
| maker-9-augustus-gene-138.36-mRNA-1 | Japonica | Indica   |  | Os09g0394300 | OsR498G0917376000.01.T01 | Endoglucanase                                                            |
| maker-9-augustus-gene-138.39-mRNA-1 | Japonica | NA       |  | Os09g0394600 | OsR498G0917379000.01.T02 | IIPc domain-containing protein (Fragment)                                |
| maker-9-augustus-gene-138.41-mRNA-1 | Japonica | Indica   |  | Os09g0394700 | OsR498G0917379000.01.T05 | Monoglyceride lipase                                                     |
| maker-9-augustus-gene-14.31-mRNA-1  | Japonica | NA       |  |              |                          | CBF domain-containing protein (Fragment)                                 |
| maker-9-augustus-gene-142.55-mRNA-1 | Japonica | NA       |  | Os09g0401600 | OsR498G0917411600.01.T01 | Plant UBX domain-containing protein 2                                    |
| maker-9-augustus-gene-143.22-mRNA-1 | Japonica | NA       |  |              | OsR498G0917414800.01.T01 |                                                                          |
| maker-9-augustus-gene-143.25-mRNA-1 | Japonica | NA       |  | Os09g0403300 | OsR498G0917417400.01.T01 | Cytokinin hydroxylase                                                    |
| maker-9-augustus-gene-144.42-mRNA-1 | Japonica | NA       |  |              | OsR498G0917420300.01.T01 |                                                                          |
| maker-9-augustus-gene-144.43-mRNA-1 | Japonica | NA       |  | Os09g0407200 | OsR498G0917421300.01.T06 | Ubiquitin receptor RAD23                                                 |
| maker-9-augustus-gene-144.49-mRNA-1 | Japonica | NA       |  |              | OsR498G0917422300.01.T01 | Mismatch repair ATPase MSH6 (MutS family)                                |
| maker-9-augustus-gene-144.55-mRNA-1 | Japonica | NA       |  | Os09g0407300 | OsR498G0917422000.01.T01 | SprT-like domain-containing protein                                      |
| maker-9-augustus-gene-144.59-mRNA-1 | Japonica | Indica   |  | Os09g0407700 | OsR498G0917422600.01.T02 | Haloacid dehalogenase-like hydrolase domain-containing protein Sgpp      |
| maker-9-augustus-gene-146.0-mRNA-1  | Japonica | NA       |  |              | OsR498G0917431500.01.T07 | Transcription initiation factor TFIID subunit 2                          |
| maker-9-augustus-gene-146.12-mRNA-1 | Japonica | Indica   |  | Os09g0410700 | OsR498G0917434200.01.T01 | Transcription factor AIG1                                                |
| maker-9-augustus-gene-146.6-mRNA-1  | Japonica | Indica   |  | Os03g0706900 | OsR498G0917431700.01.T04 | Zinc finger, RING/FYVE/PHD-type, Transmembrane Fragile-X-F-associated pr |
| maker-9-augustus-gene-147.0-mRNA-1  | Japonica | NA       |  | Os09g0411550 |                          |                                                                          |
| maker-9-augustus-gene-147.14-mRNA-1 | Japonica | NA       |  |              | OsR498G0917436000.01.T02 | Fructose-bisphosphate aldolase-lysine N-methyltransferase, chloroplastic |
| maker-9-augustus-gene-147.18-mRNA-1 | Japonica | NA       |  | Os09g0411700 | OsR498G0917436200.01.T01 | Peptidyl-prolyl cis-trans isomerase                                      |
| maker-9-augustus-gene-147.2-mRNA-1  | Japonica | NA       |  | Os09g0412700 | OsR498G0917439300.01.T01 |                                                                          |
| maker-9-augustus-gene-147.22-mRNA-1 | Japonica | NA       |  |              |                          | O-fucosyltransferase family protein (Fragment)                           |
| maker-9-augustus-gene-147.25-mRNA-1 | Japonica | Indica   |  | Os09g0412400 | OsR498G0917438600.01.T01 |                                                                          |
| maker-9-augustus-gene-147.27-mRNA-1 | Japonica | NA       |  |              | OsR498G0917441400.01.T01 | zf-C2HC5 domain-containing protein (Fragment)                            |
| maker-9-augustus-gene-147.30-mRNA-1 | Japonica | Indica   |  | Os08g0436800 | OsR498G0917442200.01.T01 | Ribosomal protein l34                                                    |
| maker-9-augustus-gene-147.4-mRNA-1  | Japonica | Indica   |  | Os08g0436200 | OsR498G0917441100.01.T03 | RING-CH-type domain-containing protein (Fragment)                        |
| maker-9-augustus-gene-147.8-mRNA-1  | Japonica | NA       |  |              | OsR498G0917441500.01.T01 | Putative membrane peptidase ydIL                                         |
| maker-9-augustus-gene-148.0-mRNA-1  | Japonica | Indica   |  | Os09g0413700 | OsR498G0917444100.01.T03 | AB hydrolase-1 domain-containing protein (Fragment)                      |
| maker-9-augustus-gene-148.3-mRNA-1  | Japonica | NA       |  | Os09g0414300 | OsR498G0917445700.01.T01 | MYB transcription factor                                                 |
| maker-9-augustus-gene-148.5-mRNA-1  | Japonica | NA       |  | Os09g0413600 | OsR498G0917442600.01.T01 | Ribosomal protein L34Ae                                                  |
| maker-9-augustus-gene-149.27-mRNA-1 | Japonica | NA       |  | Os09g0414900 | OsR498G0917450500.01.T01 | Gibberellin-regulated protein 6                                          |
| maker-9-augustus-gene-149.30-mRNA-1 | Japonica | NA       |  |              | OsR498G0917450900.01.T05 |                                                                          |
| maker-9-augustus-gene-149.33-mRNA-1 | Japonica | NA       |  | Os09g0415700 | OsR498G0917452300.01.T01 | Methyltransferase                                                        |
| maker-9-augustus-gene-149.38-mRNA-1 | Japonica | NA       |  | Os09g0415800 | OsR498G0917452800.01.T03 | ATP-dependent 6-phosphofructokinase 5 chloroplastic                      |
| maker-9-augustus-gene-150.0-mRNA-1  | Japonica | NA       |  | Os09g0416200 | OsR498G0917453500.01.T01 | Sugar carrier protein A                                                  |
| maker-9-augustus-gene-150.11-mRNA-1 | Japonica | Japonica |  | Os09g0417400 | OsR498G0917460800.01.T02 | BHLH transcription factor                                                |
| maker-9-augustus-gene-150.3-mRNA-1  | Japonica | NA       |  |              | OsR498G0917453700.01.T02 | DRBM domain-containing protein                                           |
| maker-9-augustus-gene-150.6-mRNA-1  | Japonica | NA       |  | Os09g0416900 | OsR498G0917458500.01.T01 | U-box domain-containing protein 11-like                                  |
| maker-9-augustus-gene-150.8-mRNA-1  | Japonica | NA       |  | Os09g0416700 | OsR498G0917456800.01.T01 | Golgi SNAP receptor complex member 1                                     |
| maker-9-augustus-gene-152.15-mRNA-1 | Japonica | NA       |  | Os09g0420600 | OsR498G0917472800.01.T01 | 26S proteasome non-ATPase regulatory subunit like                        |
| maker-9-augustus-gene-152.17-mRNA-1 | Japonica | NA       |  | Os09g0420900 | OsR498G0917473600.01.T01 | Btbpoz domain-containing protein npy1                                    |
| maker-9-augustus-gene-152.8-mRNA-1  | Japonica | Indica   |  | Os09g0420100 | OsR498G0917471700.01.T01 | Putative E3 ubiquitin-protein ligase ARI9                                |
| maker-9-augustus-gene-153.0-mRNA-1  | Japonica | Indica   |  | Os11g0130200 | OsR498G0917475900.01.T01 | CID domain-containing protein                                            |
| maker-9-augustus-gene-153.14-mRNA-1 | Japonica | NA       |  |              | OsR498G0917475400.01.T03 | Kinesin motor domain-containing protein (Fragment)                       |
| maker-9-augustus-gene-153.15-mRNA-1 | Japonica | NA       |  |              |                          | kinesin-related protein 4                                                |
| maker-9-augustus-gene-153.2-mRNA-1  | Japonica | NA       |  | Os09g0421500 | OsR498G0917476100.01.T01 |                                                                          |
| maker-9-augustus-gene-153.26-mRNA-1 | Japonica | NA       |  | Os09g0421300 | OsR498G0917475600.01.T01 | Phospholipase D                                                          |
| maker-9-augustus-gene-153.28-mRNA-1 | Japonica | NA       |  | Os09g0421600 |                          | Zinc finger protein 346                                                  |
| maker-9-augustus-gene-153.31-mRNA-1 | Japonica | NA       |  | Os09g0421700 | OsR498G0917476600.01.T01 | Zinc finger protein 346                                                  |
| maker-9-augustus-gene-153.33-mRNA-1 | Japonica | Japonica |  | Os09g0421800 | OsR498G0917477000.01.T01 | Matrin-type domain-containing protein                                    |
| maker-9-augustus-gene-153.36-mRNA-1 | Japonica | NA       |  | Os09g0422000 | OsR498G0917477200.01.T01 | Putrescine hydroxycinnamoyltransferase 1                                 |

|                                     |          |          |                  |              |                          |                                                                              |
|-------------------------------------|----------|----------|------------------|--------------|--------------------------|------------------------------------------------------------------------------|
| maker-9-augustus-gene-153.40-mRNA-1 | Japonica | NA       |                  | Os09g0422600 | OsR498G0917480000.01.T04 | AUGMIN subunit 8                                                             |
| maker-9-augustus-gene-153.5-mRNA-1  | Japonica | NA       |                  | Os09g0422500 | OsR498G0917479700.01.T01 | Cellulose synthase                                                           |
| maker-9-augustus-gene-153.8-mRNA-1  | Japonica | Japonica |                  | Os09g0421100 | OsR498G0917475200.01.T02 | Deoxyhypusine synthase                                                       |
| maker-9-augustus-gene-154.28-mRNA-1 | Japonica | NA       |                  |              |                          | FAR1 domain-containing protein                                               |
| maker-9-augustus-gene-154.29-mRNA-1 | Japonica | Japonica | CC-Kinase-LRR-TM | Os09g0423000 | OsR498G0917480300.01.T01 | putative leucine-rich repeat receptor-like serine/threonine-protein kinase A |
| maker-9-augustus-gene-154.35-mRNA-1 | Japonica | NA       |                  | Os09g0423700 | OsR498G0917482700.01.T01 | Tsl1-interacting protein TSP1                                                |
| maker-9-augustus-gene-154.37-mRNA-1 | Japonica | NA       |                  |              |                          | Ethylene-responsive transcription factor WRI1                                |
| maker-9-augustus-gene-154.41-mRNA-1 | Japonica | NA       |                  | Os09g0424200 | OsR498G0917483900.01.T01 | Gamma-glutamyl peptidase 3                                                   |
| maker-9-augustus-gene-154.45-mRNA-1 | Japonica | NA       |                  |              | OsR498G0917482400.01.T01 | Monogalactosyldiacylglycerol synthase                                        |
| maker-9-augustus-gene-155.50-mRNA-1 | Japonica | NA       |                  | Os09g0424600 | OsR498G0917485100.01.T04 | HAD-superfamily hydrolase subfamily IG 5'-nucleotidase                       |
| maker-9-augustus-gene-155.55-mRNA-1 | Japonica | Japonica |                  | Os09g0425400 | OsR498G0917486500.01.T01 | glycine-rich cell wall structural protein-like                               |
| maker-9-augustus-gene-155.57-mRNA-1 | Japonica | Indica   |                  | Os10g0508300 | OsR498G0917487700.01.T03 | C2C2-YABBY-transcription factor 12                                           |
| maker-9-augustus-gene-155.59-mRNA-1 | Japonica | NA       |                  | Os09g0425900 | OsR498G0917488500.01.T01 | Tetraspanin-8                                                                |
| maker-9-augustus-gene-155.61-mRNA-1 | Japonica | NA       |                  |              |                          | Protein GAMETE EXPRESSED 2                                                   |
| maker-9-augustus-gene-155.65-mRNA-1 | Japonica | NA       |                  | Os09g0426000 | OsR498G0917489000.01.T01 | EamA domain-containing protein                                               |
| maker-9-augustus-gene-155.70-mRNA-1 | Japonica | NA       |                  |              |                          | EamA domain-containing protein                                               |
| maker-9-augustus-gene-155.74-mRNA-1 | Japonica | Indica   |                  | Os09g0426100 | OsR498G0917489400.01.T01 | Auxin-induced protein 5NG4                                                   |
| maker-9-augustus-gene-155.76-mRNA-1 | Japonica | Indica   |                  | Os09g0426100 | OsR498G0917490000.01.T01 |                                                                              |
| maker-9-augustus-gene-156.0-mRNA-1  | Japonica | NA       |                  | Os09g0426800 | OsR498G0917491900.01.T01 | Aldehyde oxygenase (deformylating)                                           |
| maker-9-augustus-gene-156.11-mRNA-1 | Japonica | NA       |                  | Os09g0427300 | OsR498G0917494200.01.T01 | Amino acid transporter                                                       |
| maker-9-augustus-gene-156.13-mRNA-1 | Japonica | Indica   |                  | Os09g0428000 | OsR498G0917495200.01.T02 | Xyloglucan glycosyltransferase                                               |
| maker-9-augustus-gene-156.14-mRNA-1 | Japonica | NA       |                  | Os09g0428300 |                          | Glutamate receptor                                                           |
| maker-9-augustus-gene-156.3-mRNA-1  | Japonica | NA       |                  | Os08g0487300 | OsR498G0102102900.01.T01 | Transposon protein, putative, Mutator sub-class, expressed                   |
| maker-9-augustus-gene-156.6-mRNA-1  | Japonica | Indica   |                  | Os09g0427800 | OsR498G0917494500.01.T01 | Trehalose phosphate synthase                                                 |
| maker-9-augustus-gene-156.8-mRNA-1  | Japonica | NA       |                  | Os09g0428900 | OsR498G0917497500.01.T04 | TsaA-like domain-containing protein (Fragment)                               |
| maker-9-augustus-gene-157.0-mRNA-1  | Japonica | Japonica |                  | Os09g0429100 | OsR498G0917500700.01.T07 |                                                                              |
| maker-9-augustus-gene-157.2-mRNA-1  | Japonica | Indica   |                  | Os09g0429350 | OsR498G0917501300.01.T01 |                                                                              |
| maker-9-augustus-gene-157.4-mRNA-1  | Japonica | NA       |                  | Os09g0428300 |                          | Glutamate receptor                                                           |
| maker-9-augustus-gene-157.6-mRNA-1  | Japonica | Japonica |                  | Os09g0429400 | OsR498G0917501600.01.T03 | Glutamate receptor                                                           |
| maker-9-augustus-gene-158.30-mRNA-1 | Japonica | NA       |                  | Os09g0431100 | OsR498G0917508100.01.T01 | Glutamate receptor                                                           |
| maker-9-augustus-gene-158.32-mRNA-1 | Japonica | NA       |                  | Os09g0431200 | OsR498G0917508700.01.T01 | Glutamate receptor                                                           |
| maker-9-augustus-gene-158.41-mRNA-1 | Japonica | NA       |                  |              | OsR498G0917509000.01.T01 | Transcription factor RAX3                                                    |
| maker-9-augustus-gene-158.43-mRNA-1 | Japonica | NA       |                  | Os09g0431500 | OsR498G0917509600.01.T04 | Transcription initiation factor TFIID subunit 10                             |
| maker-9-augustus-gene-159.28-mRNA-1 | Japonica | NA       |                  |              |                          | System N amino acid transporter                                              |
| maker-9-augustus-gene-160.0-mRNA-1  | Japonica | NA       |                  | Os09g0433800 | OsR498G0917519700.01.T01 | FLZ-type domain-containing protein (Fragment)                                |
| maker-9-augustus-gene-160.16-mRNA-1 | Japonica | NA       |                  | Os09g0434200 | OsR498G0917520400.01.T01 | E3 ubiquitin-protein like                                                    |
| maker-9-augustus-gene-160.18-mRNA-1 | Japonica | Japonica |                  | Os09g0434600 | OsR498G0204973200.01.T01 | Glycosyltransferase family protein 2                                         |
| maker-9-augustus-gene-160.2-mRNA-1  | Japonica | NA       |                  | Os09g0433900 | OsR498G0917519900.01.T01 | Alanine aminotransferase                                                     |
| maker-9-augustus-gene-160.6-mRNA-1  | Japonica | NA       |                  |              | OsR498G0917524300.01.T01 |                                                                              |
| maker-9-augustus-gene-160.8-mRNA-1  | Japonica | NA       |                  | Os09g0433650 | OsR498G0917518600.01.T01 |                                                                              |
| maker-9-augustus-gene-160.9-mRNA-1  | Japonica | Indica   |                  | Os08g0451400 | OsR498G0917520200.01.T02 | ARID domain-containing protein                                               |
| maker-9-augustus-gene-161.33-mRNA-1 | Japonica | NA       |                  |              |                          | PDZ domain-containing protein                                                |
| maker-9-augustus-gene-161.39-mRNA-1 | Japonica | NA       |                  |              | OsR498G0305103200.01.T05 | KARI N-terminal Rossmann domain-containing protein                           |
| maker-9-augustus-gene-161.42-mRNA-1 | Japonica | NA       |                  |              |                          | DDHD domain-containing protein                                               |
| maker-9-augustus-gene-161.44-mRNA-1 | Japonica | NA       |                  |              | OsR498G0917527500.01.T01 | Embryogenesis-associated protein EMB8                                        |
| maker-9-augustus-gene-161.49-mRNA-1 | Japonica | NA       |                  |              | OsR498G0917527700.01.T04 | Eukaryotic initiation factor 4F subunit p150 isoform 1                       |
| maker-9-augustus-gene-161.56-mRNA-1 | Japonica | NA       |                  | Os09g0436300 | OsR498G0917526600.01.T02 |                                                                              |
| maker-9-augustus-gene-161.60-mRNA-1 | Japonica | NA       |                  | Os09g0436700 | OsR498G0917527400.01.T01 | PDZ domain-containing protein (Fragment)                                     |
| maker-9-augustus-gene-162.0-mRNA-1  | Japonica | NA       |                  | Os09g0437500 | OsR498G0917531100.01.T04 | Dormancy-associated 3                                                        |
| maker-9-augustus-gene-162.2-mRNA-1  | Japonica | NA       |                  | Os09g0437900 | OsR498G0917531500.01.T07 | Adrenodoxin-like protein 2 mitochondrial                                     |
| maker-9-augustus-gene-162.7-mRNA-1  | Japonica | NA       |                  | Os09g0438000 | OsR498G0917532300.01.T01 | Respiratory burst oxidase E                                                  |
| maker-9-augustus-gene-163.30-mRNA-1 | Japonica | NA       |                  |              |                          | Ethanolamine kinase                                                          |
| maker-9-augustus-gene-163.36-mRNA-1 | Japonica | Indica   |                  | Os03g0169400 | OsR498G0917535900.01.T04 | 50S ribosomal protein L18, chloroplastic                                     |
| maker-9-augustus-gene-163.38-mRNA-1 | Japonica | NA       |                  |              | OsR498G1018681600.01.T02 | Putative mannan synthase 4                                                   |
| maker-9-augustus-gene-163.42-mRNA-1 | Japonica | NA       |                  | Os09g0439400 | OsR498G0917537500.01.T01 | Polygalacturonase                                                            |
| maker-9-augustus-gene-163.47-mRNA-1 | Japonica | NA       |                  | Os09g0439500 | OsR498G0917537700.01.T01 | Chlorophyll a-b binding protein, chloroplastic                               |
| maker-9-augustus-gene-163.49-mRNA-1 | Japonica | NA       |                  | Os09g0438700 | OsR498G0917535200.01.T01 | 20 kDa chaperonin, chloroplastic                                             |
| maker-9-augustus-gene-163.54-mRNA-1 | Japonica | NA       |                  | Os09g0439000 |                          | DNA cross-link repair protein SNM1                                           |
| maker-9-augustus-gene-163.58-mRNA-1 | Japonica | NA       |                  | Os09g0439200 | OsR498G0917537200.01.T01 | Tify domain-containing protein                                               |
| maker-9-augustus-gene-163.60-mRNA-1 | Japonica | NA       |                  | Os09g0439700 | OsR498G0917538800.01.T03 | Transmembrane protein like                                                   |
| maker-9-augustus-gene-164.12-mRNA-1 | Japonica | NA       |                  | Os09g0439800 | OsR498G0917539200.01.T01 | Small nuclear ribonucleoprotein family protein isoform 1                     |

|                                     |          |          |              |              |                          |                                                                        |
|-------------------------------------|----------|----------|--------------|--------------|--------------------------|------------------------------------------------------------------------|
| maker-9-augustus-gene-164.14-mRNA-1 | Japonica | NA       |              | Os09g0440300 | OsR498G0917542200.01.T01 | Aldehyde dehydrogenase 7B4                                             |
| maker-9-augustus-gene-164.19-mRNA-1 | Japonica | NA       |              | Os09g0441100 | OsR498G0917544800.01.T02 | Flavonoid 3'-monooxygenase                                             |
| maker-9-augustus-gene-164.4-mRNA-1  | Japonica | Indica   |              | Os09g0440200 | OsR498G0917541700.01.T04 | BRCT domain-containing DNA repair protein                              |
| maker-9-augustus-gene-164.7-mRNA-1  | Japonica | Indica   |              | Os09g0441000 | OsR498G0917544100.01.T01 | Serine protease                                                        |
| maker-9-augustus-gene-164.9-mRNA-1  | Japonica | NA       |              | Os09g0441400 | OsR498G0917545900.01.T02 | Flavonoid 3'-monooxygenase                                             |
| maker-9-augustus-gene-165.30-mRNA-1 | Japonica | NA       |              | Os09g0441900 | OsR498G0917547300.01.T01 | Dense and erect panicle 1                                              |
| maker-9-augustus-gene-165.33-mRNA-1 | Japonica | NA       |              | Os09g0442300 | OsR498G0917550300.01.T01 | Oryzain gamma chain                                                    |
| maker-9-augustus-gene-165.41-mRNA-1 | Japonica | Indica   |              | Os09g0442600 | OsR498G0917550700.01.T01 | GTP diphosphokinase                                                    |
| maker-9-augustus-gene-165.45-mRNA-1 | Japonica | Japonica |              | Os09g0442800 | OsR498G0917551100.01.T02 | Gag-Pol polyprotein/retrotransposon                                    |
| maker-9-augustus-gene-165.49-mRNA-1 | Japonica | NA       |              |              |                          | O-fucosyltransferase family protein (Fragment)                         |
| maker-9-augustus-gene-165.54-mRNA-1 | Japonica | Indica   |              | Os01g0177400 | OsR498G0917551500.01.T01 | Gibberellin 3-beta-dioxygenase 2-2                                     |
| maker-9-augustus-gene-165.55-mRNA-1 | Japonica | Indica   |              | Os09g0441400 | OsR498G0917546600.01.T01 | Flavonoid 3'-monooxygenase                                             |
| maker-9-augustus-gene-165.57-mRNA-1 | Japonica | NA       | CC-Kinase-TM | Os09g0442100 | OsR498G0917547800.01.T01 | Serine/threonine-protein kinase RIPK                                   |
| maker-9-augustus-gene-165.60-mRNA-1 | Japonica | NA       |              |              | OsR498G0917551000.01.T02 | Chromatin complex subunit A 106                                        |
| maker-9-augustus-gene-165.66-mRNA-1 | Japonica | Japonica |              | Os09g0443000 | OsR498G0917551800.01.T01 | FBD domain-containing protein                                          |
| maker-9-augustus-gene-165.69-mRNA-1 | Japonica | NA       |              | Os09g0443400 | OsR498G1220899000.01.T02 | Glycine-rich RNA-binding protein-like                                  |
| maker-9-augustus-gene-166.0-mRNA-1  | Japonica | NA       |              |              | OsR498G0917553500.01.T01 | RWP-RK domain-containing protein                                       |
| maker-9-augustus-gene-166.10-mRNA-1 | Japonica | NA       |              | Os09g0444200 | OsR498G0917554200.01.T01 | PDAT                                                                   |
| maker-9-augustus-gene-166.14-mRNA-1 | Japonica | NA       |              | Os09g0444700 |                          | solute carrier family 25 member 44                                     |
| maker-9-augustus-gene-166.2-mRNA-1  | Japonica | Indica   |              | Os08g0462700 | OsR498G0917555100.01.T01 | BREVIS RADIX transcription factor                                      |
| maker-9-augustus-gene-166.5-mRNA-1  | Japonica | NA       |              |              |                          | Mediator of RNA polymerase II transcription subunit 20                 |
| maker-9-augustus-gene-166.8-mRNA-1  | Japonica | NA       | CC-Kinase-TM |              |                          | Serine-threonine protein kinase                                        |
| maker-9-augustus-gene-167.0-mRNA-1  | Japonica | NA       |              |              | OsR498G0917564300.01.T02 | Gamma-tubulin complex component                                        |
| maker-9-augustus-gene-167.10-mRNA-1 | Japonica | NA       |              |              | OsR498G0917567800.01.T01 | Homeobox-leucine zipper protein HAT3                                   |
| maker-9-augustus-gene-167.2-mRNA-1  | Japonica | NA       |              | Os09g0446800 | OsR498G0917566900.01.T04 | Formyltetrahydrofolate synthetase                                      |
| maker-9-augustus-gene-167.6-mRNA-1  | Japonica | NA       |              | Os09g0446000 |                          | Mitochondrial distribution and morphology protein 34 (Fragment)        |
| maker-9-augustus-gene-167.8-mRNA-1  | Japonica | NA       |              | Os09g0446400 |                          | Putative Mutator-like transposase                                      |
| maker-9-augustus-gene-168.42-mRNA-1 | Japonica | NA       |              | Os09g0448200 | OsR498G0917573900.01.T02 | Potassium transporter                                                  |
| maker-9-augustus-gene-168.45-mRNA-1 | Japonica | Indica   |              | Os09g0448500 | OsR498G0917575300.01.T01 |                                                                        |
| maker-9-augustus-gene-168.48-mRNA-1 | Japonica | NA       |              |              | OsR498G0917576100.01.T01 |                                                                        |
| maker-9-augustus-gene-168.56-mRNA-1 | Japonica | NA       |              |              | OsR498G0917570000.01.T01 | Oryzaalexin E synthase                                                 |
| maker-9-augustus-gene-168.58-mRNA-1 | Japonica | NA       |              | Os09g0447500 | OsR498G0917570600.01.T01 | Oryzaalexin E synthase                                                 |
| maker-9-augustus-gene-168.60-mRNA-1 | Japonica | NA       |              | Os09g0447900 |                          |                                                                        |
| maker-9-augustus-gene-169.11-mRNA-1 | Japonica | Indica   |              | Os09g0450600 | OsR498G0917585300.01.T01 |                                                                        |
| maker-9-augustus-gene-169.14-mRNA-1 | Japonica | NA       |              | Os09g0450300 | OsR498G0917582600.01.T02 | 65-kDa microtubule-associated protein 6                                |
| maker-9-augustus-gene-169.19-mRNA-1 | Japonica | NA       |              | Os09g0451000 | OsR498G0917586800.01.T01 | 1-amino-cyclopropane-1-carboxylic acid oxidase                         |
| maker-9-augustus-gene-169.2-mRNA-1  | Japonica | Indica   |              | Os09g0448100 | OsR498G0917580500.01.T06 | F-box protein interaction domain containing protein, expressed         |
| maker-9-augustus-gene-169.5-mRNA-1  | Japonica | NA       |              |              | OsR498G0917581500.01.T01 |                                                                        |
| maker-9-augustus-gene-169.7-mRNA-1  | Japonica | Indica   |              | Os09g0450200 | OsR498G0917582300.01.T04 | SecE/sec61-gamma subunit of protein translocation complex protein      |
| maker-9-augustus-gene-170.0-mRNA-1  | Japonica | NA       |              | Os09g0451400 | OsR498G0917588300.01.T01 | 1-aminocyclopropane-1-carboxylic acid oxidase                          |
| maker-9-augustus-gene-170.12-mRNA-1 | Japonica | NA       |              | Os09g0452900 | OsR498G0917592600.01.T02 | Hexosyltransferase                                                     |
| maker-9-augustus-gene-170.15-mRNA-1 | Japonica | NA       |              | Os09g0453000 | OsR498G0917592800.01.T01 | Transmembrane protein 50                                               |
| maker-9-augustus-gene-170.18-mRNA-1 | Japonica | NA       |              | Os09g0453300 | OsR498G0917593400.01.T02 | DCD (Development and Cell Death) domain-like protein                   |
| maker-9-augustus-gene-170.6-mRNA-1  | Japonica | NA       |              | Os09g0452200 | OsR498G0917590900.01.T01 | Erwinia induced protein 1                                              |
| maker-9-augustus-gene-170.9-mRNA-1  | Japonica | Indica   |              | Os09g0453200 | OsR498G0917593100.01.T01 | Transmembrane emp24 domain-containing protein 10                       |
| maker-9-augustus-gene-171.1-mRNA-1  | Japonica | NA       |              | Os09g0453800 | OsR498G0917594700.01.T01 | Aspartate aminotransferase                                             |
| maker-9-augustus-gene-171.11-mRNA-1 | Japonica | NA       |              | Os09g0453400 | OsR498G0917593800.01.T01 | Thylakoidal processing peptidase                                       |
| maker-9-augustus-gene-171.16-mRNA-1 | Japonica | NA       |              | Os09g0453500 | OsR498G0917594200.01.T03 | Nuclear pore complex protein NUP58                                     |
| maker-9-augustus-gene-171.22-mRNA-1 | Japonica | NA       |              |              | OsR498G0917594000.01.T05 | Peptidase S9A/B/C, oligopeptidase, N-terminal beta-propeller           |
| maker-9-augustus-gene-171.26-mRNA-1 | Japonica | NA       |              | Os09g0453900 | OsR498G0917595200.01.T01 | radial spoke head 10 homolog B-like                                    |
| maker-9-augustus-gene-171.29-mRNA-1 | Japonica | NA       |              | Os09g0454200 | OsR498G0917597200.01.T01 | Zinc finger family protein, putative isoform 3                         |
| maker-9-augustus-gene-171.3-mRNA-1  | Japonica | NA       |              | Os09g0454100 | OsR498G0917596900.01.T01 | RHOMBOLD-like protein 10 chloroplastic                                 |
| maker-9-augustus-gene-171.31-mRNA-1 | Japonica | Indica   |              | Os09g0454500 | OsR498G0917598200.01.T02 | Bifunctional monodehydroascorbate reductase and carbonic anhydrase nec |
| maker-9-augustus-gene-171.35-mRNA-1 | Japonica | NA       | Kinase-TM    | Os09g0454900 | OsR498G0917599400.01.T02 | Non-specific serine/threonine protein kinase                           |
| maker-9-augustus-gene-171.6-mRNA-1  | Japonica | NA       |              | Os09g0454300 | OsR498G0917597900.01.T01 | F-box domain-containing protein (Fragment)                             |
| maker-9-augustus-gene-171.8-mRNA-1  | Japonica | NA       |              | Os09g0454600 | OsR498G0917598500.01.T01 | Mitochondrial phosphate carrier protein 2 mitochondrial                |
| maker-9-augustus-gene-172.0-mRNA-1  | Japonica | NA       |              | Os09g0456100 | OsR498G0917606100.01.T01 |                                                                        |
| maker-9-augustus-gene-172.5-mRNA-1  | Japonica | NA       |              | Os09g0456200 | OsR498G0917606700.01.T02 | ABSCISIC ACID-INSENSITIVE 5-like protein 5                             |
| maker-9-augustus-gene-172.8-mRNA-1  | Japonica | NA       |              | Os09g0455200 | OsR498G0917600600.01.T01 | Heat shock transcription factor                                        |
| maker-9-augustus-gene-173.27-mRNA-1 | Japonica | NA       |              | Os09g0457100 | OsR498G0917610600.01.T01 | Absciscic acid 8'-hydroxylase                                          |
| maker-9-augustus-gene-174.46-mRNA-1 | Japonica | NA       |              | Os09g0457500 | OsR498G0917612100.01.T01 | Alpha-amylase isozyme 3C                                               |

|                                     |          |          |           |              |                          |                                                                            |
|-------------------------------------|----------|----------|-----------|--------------|--------------------------|----------------------------------------------------------------------------|
| maker-9-augustus-gene-174.49-mRNA-1 | Japonica | NA       |           | Os09g0457800 | OsR498G0917612900.01.T01 | Alpha-amylase isozyme 3B                                                   |
| maker-9-augustus-gene-174.56-mRNA-1 | Japonica | Japonica |           | Os09g0458000 | OsR498G0917614100.01.T01 | Protein WEAK CHLOROPLAST MOVEMENT UNDER BLUE LIGHT 1                       |
| maker-9-augustus-gene-174.58-mRNA-1 | Japonica | NA       | LRR-TM    | Os09g0458300 | OsR498G0917614700.01.T01 | Putative leucine-rich repeat receptor-like serine/threonine-protein kinase |
| maker-9-augustus-gene-174.60-mRNA-1 | Japonica | NA       |           | Os09g0458400 | OsR498G0917614900.01.T01 | Protein disulfide-isomerase SCO2                                           |
| maker-9-augustus-gene-174.64-mRNA-1 | Japonica | NA       |           |              |                          |                                                                            |
| maker-9-augustus-gene-174.66-mRNA-1 | Japonica | NA       |           | Os09g0459800 | OsR498G0917619300.01.T01 | ARP protein (REF)                                                          |
| maker-9-augustus-gene-174.73-mRNA-1 | Japonica | NA       |           | Os09g0460100 | OsR498G0917620300.01.T01 | Alanine racemase                                                           |
| maker-9-augustus-gene-174.75-mRNA-1 | Japonica | NA       |           | Os09g0458100 | OsR498G0917614400.01.T01 | Fucosyltransferase                                                         |
| maker-9-augustus-gene-174.80-mRNA-1 | Japonica | Indica   |           | Os09g0459900 | OsR498G0917620000.01.T01 | Cyclin-dependent kinase inhibitor                                          |
| maker-9-augustus-gene-175.41-mRNA-1 | Japonica | Indica   |           | Os08g0474700 | OsR498G0917621100.01.T01 | Protein transport protein SEC23                                            |
| maker-9-augustus-gene-175.47-mRNA-1 | Japonica | NA       |           | Os09g0462400 | OsR498G0917626300.01.T05 | Patatin                                                                    |
| maker-9-augustus-gene-176.42-mRNA-1 | Japonica | Indica   |           | Os09g0462700 | OsR498G0917629100.01.T01 | Polyadenylate-binding protein RBP47                                        |
| maker-9-augustus-gene-176.46-mRNA-1 | Japonica | NA       |           | Os09g0463300 | OsR498G0917631500.01.T02 | Ternary complex factor MIP1-like protein                                   |
| maker-9-augustus-gene-176.50-mRNA-1 | Japonica | Indica   |           | Os08g0477900 | OsR498G0917635100.01.T01 | BHLH domain-containing protein (Fragment)                                  |
| maker-9-augustus-gene-176.52-mRNA-1 | Japonica | Japonica |           | Os09g0462901 | OsR498G0917629800.01.T01 | Carboxypeptidase                                                           |
| maker-9-augustus-gene-176.55-mRNA-1 | Japonica | NA       |           |              | OsR498G0917630200.01.T02 | Carboxypeptidase                                                           |
| maker-9-augustus-gene-176.58-mRNA-1 | Japonica | NA       |           | Os09g0464000 | OsR498G0917635400.01.T02 | Carbonic anhydrase                                                         |
| maker-9-augustus-gene-177.0-mRNA-1  | Japonica | NA       |           |              |                          |                                                                            |
| maker-9-augustus-gene-177.10-mRNA-1 | Japonica | NA       |           | Os09g0466300 | OsR498G0917644900.01.T01 | GRAM domain                                                                |
| maker-9-augustus-gene-177.14-mRNA-1 | Japonica | NA       |           | Os09g0464400 | OsR498G0917638000.01.T01 | USP domain-containing protein                                              |
| maker-9-augustus-gene-177.19-mRNA-1 | Japonica | NA       |           | Os09g0465600 | OsR498G0917641000.01.T01 | Glucose-6-phosphate isomerase                                              |
| maker-9-augustus-gene-177.24-mRNA-1 | Japonica | NA       |           | Os09g0465800 | OsR498G0917641400.01.T03 | CAAD domain-containing protein (Fragment)                                  |
| maker-9-augustus-gene-177.3-mRNA-1  | Japonica | Japonica |           | Os09g0465500 | OsR498G0917640700.01.T01 |                                                                            |
| maker-9-augustus-gene-177.7-mRNA-1  | Japonica | NA       |           | Os09g0466100 | OsR498G0917643500.01.T01 | Cyclin dependent kinase regulator                                          |
| maker-9-augustus-gene-178.36-mRNA-1 | Japonica | NA       |           | Os03g0114600 | OsR498G0612855600.01.T01 | Calcineurin-like phosphoesterase family protein, putative                  |
| maker-9-augustus-gene-178.38-mRNA-1 | Japonica | NA       |           | Os09g0467100 | OsR498G0917648500.01.T03 | SAICAR synthetase                                                          |
| maker-9-augustus-gene-178.44-mRNA-1 | Japonica | Japonica |           | Os09g0467200 | OsR498G0510836400.01.T01 | Tau class glutathione S-transferase                                        |
| maker-9-augustus-gene-178.46-mRNA-1 | Japonica | NA       |           | Os09g0468000 | OsR498G0917650500.01.T01 | Protein DETOXIFICATION                                                     |
| maker-9-augustus-gene-178.48-mRNA-1 | Japonica | NA       |           | Os09g0466800 |                          | Putative glycosyltransferase 61                                            |
| maker-9-augustus-gene-178.50-mRNA-1 | Japonica | Japonica | Kinase-TM | Os09g0466900 | OsR498G0917648000.01.T01 | Serine/threonine-protein kinase PEPKR2                                     |
| maker-9-augustus-gene-178.54-mRNA-1 | Japonica | NA       |           | Os09g0467300 | OsR498G0917648800.01.T01 | Purine permease 3                                                          |
| maker-9-augustus-gene-178.56-mRNA-1 | Japonica | NA       |           | Os09g0467400 | OsR498G0917649000.01.T01 | Purine permease 3                                                          |
| maker-9-augustus-gene-178.57-mRNA-1 | Japonica | Japonica |           | Os09g0467400 | OsR498G0917649000.01.T01 | Purine transporter                                                         |
| maker-9-augustus-gene-179.41-mRNA-1 | Japonica | NA       |           | Os09g0468700 | OsR498G0917653900.01.T02 | Transcription factor bHLH96 isoform A                                      |
| maker-9-augustus-gene-179.43-mRNA-1 | Japonica | NA       |           | Os09g0468900 | OsR498G0917654300.01.T01 | Phytoecyanin domain-containing protein                                     |
| maker-9-augustus-gene-179.47-mRNA-1 | Japonica | Indica   |           | Os09g0469300 | OsR498G0917654500.01.T01 | Phytoecyanin domain-containing protein (Fragment)                          |
| maker-9-augustus-gene-179.49-mRNA-1 | Japonica | NA       |           | Os09g0469900 | OsR498G0917656500.01.T01 | Queuine tRNA-ribosyltransferase catalytic subunit 1                        |
| maker-9-augustus-gene-179.54-mRNA-1 | Japonica | NA       |           |              | OsR498G0917656700.01.T01 | Plastidic general dicarboxylate transporter                                |
| maker-9-augustus-gene-179.58-mRNA-1 | Japonica | NA       |           |              |                          | Isoamylase-type starch debranching enzyme3                                 |
| maker-9-augustus-gene-179.59-mRNA-1 | Japonica | NA       |           |              | OsR498G0917656000.01.T04 | Isoamylase-type starch debranching enzyme ISO3                             |
| maker-9-augustus-gene-180.34-mRNA-1 | Japonica | NA       |           | Os09g0470500 | OsR498G0917658500.01.T01 | Class I homeodomain-leucine zipper protein 4                               |
| maker-9-augustus-gene-180.38-mRNA-1 | Japonica | NA       |           | Os09g0470900 | OsR498G0917659300.01.T01 | Signal transducer                                                          |
| maker-9-augustus-gene-180.41-mRNA-1 | Japonica | Indica   |           | Os09g0471000 | OsR498G0917659900.01.T01 | Cysteine dioxygenase                                                       |
| maker-9-augustus-gene-180.45-mRNA-1 | Japonica | NA       |           | Os09g0471100 | OsR498G0917660200.01.T01 | Peroxidase                                                                 |
| maker-9-augustus-gene-180.47-mRNA-1 | Japonica | NA       | Kinase    | Os09g0471200 | OsR498G0917660800.01.T02 | Wall-associated receptor kinase 3                                          |
| maker-9-augustus-gene-180.51-mRNA-1 | Japonica | NA       | Kinase-TM |              | OsR498G0917661800.01.T01 | Wall-associated receptor kinase-like 8                                     |
| maker-9-augustus-gene-180.54-mRNA-1 | Japonica | NA       |           |              | OsR498G0917662800.01.T02 | Wall-associated receptor kinase 3                                          |
| maker-9-augustus-gene-181.33-mRNA-1 | Japonica | NA       |           | Os09g0471900 | OsR498G0917664100.01.T01 | tRNA (Cytosine(34)-C(5))-methyltransferase                                 |
| maker-9-augustus-gene-181.39-mRNA-1 | Japonica | NA       |           | Os09g0472100 | OsR498G0917665300.01.T01 | ABC transporter domain-containing protein (Fragment)                       |
| maker-9-augustus-gene-181.41-mRNA-1 | Japonica | NA       |           | Os09g0472200 |                          | ABC transporter domain-containing protein (Fragment)                       |
| maker-9-augustus-gene-181.48-mRNA-1 | Japonica | Indica   |           | Os09g0472700 | OsR498G0917668100.01.T01 | Expansin-like EG45 domain-containing protein (Fragment)                    |
| maker-9-augustus-gene-181.50-mRNA-1 | Japonica | NA       | Kinase-TM |              |                          | Wall-associated receptor kinase                                            |
| maker-9-augustus-gene-181.52-mRNA-1 | Japonica | NA       |           |              | OsR498G0917668400.01.T01 | Methyl binding domain117                                                   |
| maker-9-augustus-gene-182.0-mRNA-1  | Japonica | NA       |           | Os09g0474100 | OsR498G0917671300.01.T07 | BHLH transcription factor (Fragment)                                       |
| maker-9-augustus-gene-182.15-mRNA-1 | Japonica | Indica   |           | Os09g0474300 | OsR498G0917672200.01.T01 | Heat shock protein like                                                    |
| maker-9-augustus-gene-182.5-mRNA-1  | Japonica | NA       |           |              | OsR498G0917669200.01.T03 |                                                                            |
| maker-9-augustus-gene-182.7-mRNA-1  | Japonica | NA       |           |              | OsR498G0917669600.01.T02 | Pentatricopeptide repeat-containing protein (Fragment)                     |
| maker-9-augustus-gene-183.0-mRNA-1  | Japonica | NA       |           |              | OsR498G0917677100.01.T06 | BHLH transcription factor                                                  |
| maker-9-augustus-gene-183.13-mRNA-1 | Japonica | NA       |           | Os09g0475700 | OsR498G0917678200.01.T06 | Prolyl endopeptidase-like                                                  |
| maker-9-augustus-gene-183.9-mRNA-1  | Japonica | Indica   |           | Os06g0284200 | OsR498G0917677600.01.T01 | O-fucosyltransferase family protein                                        |
| maker-9-augustus-gene-184.33-mRNA-1 | Japonica | NA       |           | Os09g0479100 | OsR498G0917689300.01.T04 | F-box protein CPR30                                                        |



|                                     |          |          |           |              |                          |                                                                         |
|-------------------------------------|----------|----------|-----------|--------------|--------------------------|-------------------------------------------------------------------------|
| maker-9-augustus-gene-185.41-mRNA-1 | Japonica | Indica   |           | Os02g0198700 | OsR498G0917692300.01.T01 | Subtilisin-like protease                                                |
| maker-9-augustus-gene-185.48-mRNA-1 | Japonica | NA       |           | Os09g0481100 | OsR498G0917697100.01.T05 | Phosphatidylinositol/phosphatidylcholine transfer protein SFH13         |
| maker-9-augustus-gene-185.54-mRNA-1 | Japonica | NA       | CC-NBS-TM | Os09g0479500 | OsR498G0917691400.01.T01 | Disease resistance protein RPM1                                         |
| maker-9-augustus-gene-185.56-mRNA-1 | Japonica | NA       |           |              | OsR498G0917697600.01.T02 | WPP domain-interacting protein 2                                        |
| maker-9-augustus-gene-185.58-mRNA-1 | Japonica | NA       |           | Os09g0481400 | OsR498G0917697800.01.T01 | Caffeoyl-CoA O-methyltransferase 1                                      |
| maker-9-augustus-gene-186.0-mRNA-1  | Japonica | Japonica |           | Os09g0482200 | OsR498G0612924300.01.T02 | Aspartic proteinase nepenthesin-1                                       |
| maker-9-augustus-gene-186.10-mRNA-1 | Japonica | NA       |           | Os09g0481700 | OsR498G0917698800.01.T03 | WRKY transcription factor                                               |
| maker-9-augustus-gene-186.13-mRNA-1 | Japonica | NA       |           | Os09g0482000 | OsR498G0917700200.01.T01 | Plant UBX domain-containing protein 10                                  |
| maker-9-augustus-gene-186.16-mRNA-1 | Japonica | NA       |           | Os09g0482100 | OsR498G0917700400.01.T01 | Cytosolic heat shock protein 90                                         |
| maker-9-augustus-gene-186.17-mRNA-1 | Japonica | NA       |           | Os09g0482610 | OsR498G0917701400.01.T01 | Cytosolic heat shock protein 90                                         |
| maker-9-augustus-gene-186.2-mRNA-1  | Japonica | NA       | Kinase-TM | Os09g0482640 | OsR498G0917701900.01.T01 | Wall associated kinase                                                  |
| maker-9-augustus-gene-186.26-mRNA-1 | Japonica | NA       |           |              |                          | Sodium/hydrogen exchanger                                               |
| maker-9-augustus-gene-186.30-mRNA-1 | Japonica | Indica   |           | Os09g0482660 | OsR498G0917703200.01.T01 | CO(2)-response secreted protease                                        |
| maker-9-augustus-gene-186.34-mRNA-1 | Japonica | NA       |           | Os09g0482680 | OsR498G0917705000.01.T01 | tRNase Z TRZ2, chloroplastic                                            |
| maker-9-augustus-gene-186.39-mRNA-1 | Japonica | NA       |           |              | OsR498G0917705200.01.T02 | BPI2 domain-containing protein (Fragment)                               |
| maker-9-augustus-gene-186.4-mRNA-1  | Japonica | NA       |           | Os09g0482740 | OsR498G0917705500.01.T01 | DUF1664 domain-containing protein (Fragment)                            |
| maker-9-augustus-gene-187.0-mRNA-1  | Japonica | NA       |           | Os09g0484200 | OsR498G0917711700.01.T01 | Induced stolon tip protein TUB8                                         |
| maker-9-augustus-gene-187.3-mRNA-1  | Japonica | NA       |           | Os09g0484300 | OsR498G0917712000.01.T01 | Ubiquitin-protein ligase 7                                              |
| maker-9-augustus-gene-188.26-mRNA-1 | Japonica | NA       |           | Os09g0484800 | OsR498G0917713300.01.T01 | pirin-like protein isoform X1                                           |
| maker-9-augustus-gene-188.28-mRNA-1 | Japonica | NA       |           | Os09g0484900 | OsR498G0917714500.01.T02 | Tonoplast dicarboxylate transporter                                     |
| maker-9-augustus-gene-188.31-mRNA-1 | Japonica | Japonica |           | Os09g0485800 | OsR498G0917716700.01.T01 | Latent-transforming growth factor beta-binding protein like             |
| maker-9-augustus-gene-188.33-mRNA-1 | Japonica | NA       |           | Os06g0246600 | OsR498G0713362700.01.T01 | Glutamate receptor                                                      |
| maker-9-augustus-gene-188.35-mRNA-1 | Japonica | NA       |           | Os09g0485900 | OsR498G0917716600.01.T01 | 60S ribosomal protein L9                                                |
| maker-9-augustus-gene-188.39-mRNA-1 | Japonica | NA       |           |              | OsR498G0917719600.01.T01 |                                                                         |
| maker-9-augustus-gene-188.41-mRNA-1 | Japonica | NA       |           | Os09g0487200 | OsR498G0917720000.01.T04 | Dilute domain-containing protein (Fragment)                             |
| maker-9-augustus-gene-189.29-mRNA-1 | Japonica | NA       |           | Os09g0487700 | OsR498G0917721300.01.T04 | OTU domain-containing protein                                           |
| maker-9-augustus-gene-189.32-mRNA-1 | Japonica | NA       |           | Os09g0487900 | OsR498G0917721500.01.T01 | Transcription factor bHLH130                                            |
| maker-9-augustus-gene-189.36-mRNA-1 | Japonica | NA       |           | Os09g0488600 | OsR498G0917722500.01.T01 | Inactive rhomboid 1                                                     |
| maker-9-augustus-gene-189.39-mRNA-1 | Japonica | Indica   |           | Os09g0488700 | OsR498G0917722900.01.T02 | Cobyric acid synthase (Fragment)                                        |
| maker-9-augustus-gene-189.42-mRNA-1 | Japonica | NA       |           | Os09g0487600 | OsR498G0917721000.01.T01 | Polygalacturonaseprecursor                                              |
| maker-9-augustus-gene-189.44-mRNA-1 | Japonica | NA       |           | Os09g0488800 | OsR498G0917723200.01.T01 | IRK-interacting protein (Fragment)                                      |
| maker-9-augustus-gene-189.46-mRNA-1 | Japonica | NA       |           | Os09g0489200 | OsR498G0917724200.01.T02 | JmjC domain                                                             |
| maker-9-augustus-gene-189.53-mRNA-1 | Japonica | NA       |           | Os09g0489500 | OsR498G0917724400.01.T02 | BZIP transcription factor                                               |
| maker-9-augustus-gene-189.57-mRNA-1 | Japonica | Indica   |           | Os09g0491100 | OsR498G0917725800.01.T01 | 4-hydroxy-7-methoxy-3-oxo-3,4-dihydro-2H-1,4-benzoxazin-2-yl glucosideb |
| maker-9-augustus-gene-190.36-mRNA-1 | Japonica | NA       |           | Os09g0491100 | OsR498G0917727000.01.T01 | 4-hydroxy-7-methoxy-3-oxo-3,4-dihydro-2H-1,4-benzoxazin-2-yl glucosideb |
| maker-9-augustus-gene-190.39-mRNA-1 | Japonica | Indica   |           | Os09g0491532 | OsR498G0917728000.01.T01 | Squamosa promoter-binding-like protein 9                                |
| maker-9-augustus-gene-190.41-mRNA-1 | Japonica | NA       |           |              |                          |                                                                         |
| maker-9-augustus-gene-190.43-mRNA-1 | Japonica | NA       |           |              | OsR498G0917730800.01.T01 | Bromo domain-containing protein                                         |
| maker-9-augustus-gene-190.45-mRNA-1 | Japonica | NA       |           | Os09g0491692 | OsR498G0917731600.01.T01 | Midasin like                                                            |
| maker-9-augustus-gene-190.47-mRNA-1 | Japonica | NA       |           | Os09g0491708 | OsR498G0917731800.01.T01 | AT-hook motif nuclear-localized protein (Fragment)                      |
| maker-9-augustus-gene-190.50-mRNA-1 | Japonica | NA       |           |              | OsR498G0917732800.01.T01 | Putative membrane transport protein                                     |
| maker-9-augustus-gene-190.55-mRNA-1 | Japonica | NA       |           | Os09g0491772 | OsR498G0917733200.01.T01 | Heat shock protein, mitochondrial                                       |
| maker-9-augustus-gene-191.0-mRNA-1  | Japonica | NA       |           | Os09g0492700 | OsR498G0917736100.01.T01 | 3-hydroxy-3-methylglutaryl coenzyme A reductase                         |
| maker-9-augustus-gene-191.14-mRNA-1 | Japonica | NA       |           | Os09g0491852 | OsR498G0917735200.01.T03 | Dihydroflavonol-4-reductase                                             |
| maker-9-augustus-gene-191.18-mRNA-1 | Japonica | Japonica |           | Os09g0491868 | OsR498G0917735400.01.T02 | Epimerase domain-containing protein (Fragment)                          |
| maker-9-augustus-gene-191.20-mRNA-1 | Japonica | NA       |           |              | OsR498G0917736600.01.T01 | Cysteine/Histidine-rich C1 domain family protein, putative isoform 1    |
| maker-9-augustus-gene-191.3-mRNA-1  | Japonica | NA       |           | Os09g0491788 | OsR498G0917733800.01.T01 | Epimerase domain-containing protein (Fragment)                          |
| maker-9-augustus-gene-191.5-mRNA-1  | Japonica | NA       |           | Os09g0491820 | OsR498G0917734800.01.T01 | Dihydroflavonol-4-reductase                                             |
| maker-9-augustus-gene-191.8-mRNA-1  | Japonica | NA       |           | Os09g0491852 | OsR498G0917735000.01.T02 | Epimerase domain-containing protein                                     |
| maker-9-augustus-gene-191.9-mRNA-1  | Japonica | NA       |           | Os09g0518400 |                          | NAD-dependent epimerase/dehydratase                                     |
| maker-9-augustus-gene-192.40-mRNA-1 | Japonica | NA       |           | Os09g0493400 | OsR498G0917737700.01.T01 | Ternary complex factor-like                                             |
| maker-9-augustus-gene-192.46-mRNA-1 | Japonica | NA       |           | Os09g0494200 | OsR498G0917739300.01.T01 | Chitinase                                                               |
| maker-9-augustus-gene-192.49-mRNA-1 | Japonica | NA       |           | Os09g0494600 | OsR498G0917740300.01.T01 |                                                                         |
| maker-9-augustus-gene-192.51-mRNA-1 | Japonica | NA       |           |              | OsR498G0917741700.01.T01 |                                                                         |
| maker-9-augustus-gene-192.53-mRNA-1 | Japonica | NA       |           | Os09g0495200 | OsR498G0917742100.01.T01 |                                                                         |
| maker-9-augustus-gene-192.59-mRNA-1 | Japonica | NA       |           | Os09g0493500 | OsR498G0917738000.01.T03 | Epimerase domain-containing protein                                     |
| maker-9-augustus-gene-192.61-mRNA-1 | Japonica | NA       |           | Os09g0493600 | OsR498G0917738200.01.T01 | Protein lojap, chloroplastic                                            |
| maker-9-augustus-gene-192.66-mRNA-1 | Japonica | NA       |           | Os09g0493700 | OsR498G0917738400.01.T02 | NAC transcription factor                                                |
| maker-9-augustus-gene-192.70-mRNA-1 | Japonica | NA       |           | Os09g0493800 | OsR498G0917738600.01.T01 | DnaJ domain                                                             |
| maker-9-augustus-gene-192.73-mRNA-1 | Japonica | NA       |           | Os09g0494300 | OsR498G0917739600.01.T01 | Methyl-CpG-binding domain-containing protein 2                          |
| maker-9-augustus-gene-192.76-mRNA-1 | Japonica | NA       |           |              | OsR498G0917740000.01.T01 |                                                                         |

|                                     |          |          |  |              |                          |                                                                       |
|-------------------------------------|----------|----------|--|--------------|--------------------------|-----------------------------------------------------------------------|
| maker-9-augustus-gene-192.78-mRNA-1 | Japonica | NA       |  |              |                          |                                                                       |
| maker-9-augustus-gene-192.80-mRNA-1 | Japonica | Indica   |  | Os09g0495400 | OsR498G0917742800.01.T01 |                                                                       |
| maker-9-augustus-gene-193.0-mRNA-1  | Japonica | NA       |  | Os09g0497000 | OsR498G0917743900.01.T05 | Putative mitochondrial adenine nucleotide transporter BTL1            |
| maker-9-augustus-gene-193.11-mRNA-1 | Japonica | NA       |  | Os09g0497700 | OsR498G0917745500.01.T02 | Myosin heavy chain-related                                            |
| maker-9-augustus-gene-193.17-mRNA-1 | Japonica | Indica   |  | Os09g0536300 | OsR498G0917746700.01.T01 | Pathogenesis-related protein 5                                        |
| maker-9-augustus-gene-193.19-mRNA-1 | Japonica | Indica   |  | Os09g0498600 | OsR498G0917748700.01.T02 | Poly(RC)-binding protein 3-like                                       |
| maker-9-augustus-gene-193.22-mRNA-1 | Japonica | Indica   |  | Os08g0168150 | OsR498G0917743600.01.T01 | Actin assembly factor                                                 |
| maker-9-augustus-gene-193.24-mRNA-1 | Japonica | NA       |  |              | OsR498G0917743800.01.T02 | tRNA-splicing endonuclease positive effector (SEN1)                   |
| maker-9-augustus-gene-193.26-mRNA-1 | Japonica | NA       |  |              | OsR498G0917743800.01.T03 | P-loop containing nucleoside triphosphate hydrolase                   |
| maker-9-augustus-gene-193.31-mRNA-1 | Japonica | NA       |  | Os09g0497100 | OsR498G0917744200.01.T02 | PUM-HD domain-containing protein                                      |
| maker-9-augustus-gene-193.34-mRNA-1 | Japonica | NA       |  | Os09g0497500 | OsR498G0917745200.01.T01 | Senescence-specific cysteine protease                                 |
| maker-9-augustus-gene-193.37-mRNA-1 | Japonica | NA       |  |              | OsR498G0917745400.01.T01 | F-box domain                                                          |
| maker-9-augustus-gene-193.41-mRNA-1 | Japonica | NA       |  | Os09g0497900 | OsR498G0917746200.01.T01 | NAC domain containing protein 38                                      |
| maker-9-augustus-gene-193.44-mRNA-1 | Japonica | Indica   |  | Os12g0543600 | OsR498G0917747400.01.T01 | DAO domain-containing protein (Fragment)                              |
| maker-9-augustus-gene-193.5-mRNA-1  | Japonica | NA       |  | Os09g0497400 | OsR498G0917744900.01.T04 | ER membrane protein complex subunit 3                                 |
| maker-9-augustus-gene-194.0-mRNA-1  | Japonica | NA       |  | Os09g0498700 | OsR498G0917748900.01.T01 | F-box domain-containing protein                                       |
| maker-9-augustus-gene-194.11-mRNA-1 | Japonica | NA       |  | Os09g0498800 | OsR498G0917749800.01.T01 | O-fucosyltransferase family protein (Fragment)                        |
| maker-9-augustus-gene-194.14-mRNA-1 | Japonica | NA       |  | Os09g0499000 | OsR498G0917750600.01.T01 | Oligopeptide transporter-like protein                                 |
| maker-9-augustus-gene-194.16-mRNA-1 | Japonica | NA       |  | Os09g0499600 |                          | HAT dimerization domain-containing protein / transposase-like protein |
| maker-9-augustus-gene-194.19-mRNA-1 | Japonica | NA       |  | Os09g0500000 | OsR498G0917753800.01.T01 | FBD domain-containing protein                                         |
| maker-9-augustus-gene-194.2-mRNA-1  | Japonica | NA       |  | Os09g0500300 | OsR498G0917754500.01.T01 | Type II inositol polyphosphate 5-phosphatase 15                       |
| maker-9-augustus-gene-194.24-mRNA-1 | Japonica | NA       |  | Os09g0500100 | OsR498G0917754200.01.T02 | FBD domain-containing protein                                         |
| maker-9-augustus-gene-194.27-mRNA-1 | Japonica | NA       |  | Os09g0500200 | OsR498G0917754400.01.T02 | NADH dehydrogenase [ubiquinone] 1 alpha subcomplex subunit 12         |
| maker-9-augustus-gene-194.8-mRNA-1  | Japonica | NA       |  | Os09g0500600 | OsR498G0917754700.01.T01 | DNA topoisomerase                                                     |
| maker-9-augustus-gene-195.49-mRNA-1 | Japonica | NA       |  | Os09g0501100 | OsR498G0917756100.01.T01 | 60S ribosomal protein L32                                             |
| maker-9-augustus-gene-195.52-mRNA-1 | Japonica | NA       |  | Os09g0502500 | OsR498G0917759700.01.T01 | Chloroplastic quinone-oxidoreductase                                  |
| maker-9-augustus-gene-195.56-mRNA-1 | Japonica | NA       |  | Os09g0503100 | OsR498G0917761900.01.T01 | Chloroplastic quinone-oxidoreductase                                  |
| maker-9-augustus-gene-195.60-mRNA-1 | Japonica | Indica   |  | Os08g0524200 | OsR498G0917755000.01.T01 | Cytochrome b561 and DOMON domain-containing protein (Fragment)        |
| maker-9-augustus-gene-195.62-mRNA-1 | Japonica | NA       |  | Os09g0501600 | OsR498G0917757000.01.T02 | BHLH transcription factor                                             |
| maker-9-augustus-gene-195.66-mRNA-1 | Japonica | Indica   |  | Os09g0501700 | OsR498G0917757400.01.T01 | 60S ribosomal protein L32                                             |
| maker-9-augustus-gene-195.70-mRNA-1 | Japonica | NA       |  | Os09g0501850 | OsR498G0917757600.01.T01 | Peptidylprolyl isomerase                                              |
| maker-9-augustus-gene-195.72-mRNA-1 | Japonica | NA       |  | Os09g0502000 | OsR498G0917757800.01.T01 | 60S ribosomal protein L32                                             |
| maker-9-augustus-gene-195.74-mRNA-1 | Japonica | NA       |  |              | OsR498G0917758000.01.T01 | FK506-binding protein 2-1                                             |
| maker-9-augustus-gene-195.78-mRNA-1 | Japonica | NA       |  | Os09g0502200 | OsR498G0917759000.01.T01 | Glucan endo-1,3-beta-D-glucosidase                                    |
| maker-9-augustus-gene-195.82-mRNA-1 | Japonica | Indica   |  | Os09g0502600 | OsR498G0917760000.01.T02 | FBD domain-containing protein                                         |
| maker-9-augustus-gene-195.84-mRNA-1 | Japonica | NA       |  |              | OsR498G0917761000.01.T01 | FBD domain-containing protein                                         |
| maker-9-augustus-gene-196.0-mRNA-1  | Japonica | NA       |  | Os09g0504400 | OsR498G0917764300.01.T01 | (RAP Annotation release2) Cyclin                                      |
| maker-9-augustus-gene-196.10-mRNA-1 | Japonica | Japonica |  | Os09g0505200 | OsR498G0917766700.01.T05 | FHA domain-containing protein FHA2                                    |
| maker-9-augustus-gene-196.13-mRNA-1 | Japonica | Indica   |  | Os09g0505600 | OsR498G0917767700.01.T01 | Proteasome endopeptidase complex                                      |
| maker-9-augustus-gene-196.16-mRNA-1 | Japonica | NA       |  | Os09g0505700 | OsR498G0917767900.01.T04 | Ribulose-phosphate 3-epimerase                                        |
| maker-9-augustus-gene-196.21-mRNA-1 | Japonica | NA       |  | Os09g0505800 | OsR498G0917768300.01.T01 | Uridine kinase                                                        |
| maker-9-augustus-gene-196.28-mRNA-1 | Japonica | NA       |  |              | OsR498G0917768500.01.T01 | Purple acid phosphatase                                               |
| maker-9-augustus-gene-196.30-mRNA-1 | Japonica | NA       |  | Os09g0504700 | OsR498G0917764600.01.T02 | RING/U-box superfamily protein                                        |
| maker-9-augustus-gene-196.32-mRNA-1 | Japonica | NA       |  | Os09g0504900 | OsR498G0917765000.01.T02 | Calcium-dependent protein kinase 14                                   |
| maker-9-augustus-gene-196.37-mRNA-1 | Japonica | NA       |  | Os09g0505100 | OsR498G0917766200.01.T01 | Ubiquitinyl hydrolase 1                                               |
| maker-9-augustus-gene-196.39-mRNA-1 | Japonica | NA       |  | Os09g0505300 | OsR498G0917767000.01.T02 | Acyl-[acyl-carrier-protein] hydrolase                                 |
| maker-9-augustus-gene-196.43-mRNA-1 | Japonica | Japonica |  | Os09g0505400 | OsR498G0917767400.01.T01 | Auxin efflux carrier component                                        |
| maker-9-augustus-gene-196.7-mRNA-1  | Japonica | NA       |  | Os09g0504800 | OsR498G0917764700.01.T01 | tRNA-splicing endonuclease                                            |
| maker-9-augustus-gene-197.0-mRNA-1  | Japonica | Indica   |  | Os03g0202500 | OsR498G0917768900.01.T07 | FBD domain-containing protein                                         |
| maker-9-augustus-gene-197.20-mRNA-1 | Japonica | Japonica |  | Os09g0506700 | OsR498G0917770300.01.T01 | FBD domain-containing protein                                         |
| maker-9-augustus-gene-197.24-mRNA-1 | Japonica | NA       |  | Os09g0506800 | OsR498G0917770500.01.T06 | HORMA domain-containing protein 1                                     |
| maker-9-augustus-gene-197.32-mRNA-1 | Japonica | NA       |  |              | OsR498G0917770900.01.T01 | HORMA domain-containing protein 1                                     |
| maker-9-augustus-gene-197.38-mRNA-1 | Japonica | NA       |  | Os09g0507200 | OsR498G0917772700.01.T01 | agamous-like MADS-box protein AGL9 homolog                            |
| maker-9-augustus-gene-197.42-mRNA-1 | Japonica | NA       |  | Os09g0507300 | OsR498G0917773100.01.T01 | L-ascorbate oxidase                                                   |
| maker-9-augustus-gene-197.44-mRNA-1 | Japonica | NA       |  | Os09g0507400 | OsR498G0917774100.01.T01 | Transcription initiation factor TFIID subunit like                    |
| maker-9-augustus-gene-197.46-mRNA-1 | Japonica | NA       |  |              |                          | HTH myb-type domain-containing protein                                |
| maker-9-augustus-gene-197.48-mRNA-1 | Japonica | NA       |  | Os09g0506000 | OsR498G0917768800.01.T01 | Purple acid phosphatase                                               |
| maker-9-augustus-gene-197.52-mRNA-1 | Japonica | NA       |  | Os09g0507500 | OsR498G0917774400.01.T01 | Peroxidase                                                            |
| maker-9-augustus-gene-197.54-mRNA-1 | Japonica | Indica   |  | Os08g0532900 | OsR498G0917774600.01.T04 | GOLD domain-containing protein (Fragment)                             |
| maker-9-augustus-gene-197.6-mRNA-1  | Japonica | NA       |  |              |                          | keratinocyte proline-rich protein-like                                |
| maker-9-augustus-gene-197.7-mRNA-1  | Japonica | NA       |  | Os09g0506300 |                          | FBD domain-containing protein                                         |

|                                     |          |          |            |              |                          |                                                                         |
|-------------------------------------|----------|----------|------------|--------------|--------------------------|-------------------------------------------------------------------------|
| maker-9-augustus-gene-198.35-mRNA-1 | Japonica | Indica   |            | Os09g0508500 | OsR498G091777500.01.T02  | Double-stranded RNA binding motif family protein                        |
| maker-9-augustus-gene-198.38-mRNA-1 | Japonica | NA       |            | Os09g0509100 | OsR498G0917779100.01.T01 | NAC transcription factor                                                |
| maker-9-augustus-gene-198.40-mRNA-1 | Japonica | NA       |            | Os09g0509200 | OsR498G0917779300.01.T01 | Pyruvate dehydrogenase (acetyl-transferring)                            |
| maker-9-augustus-gene-198.46-mRNA-1 | Japonica | NA       |            | Os09g0509300 | OsR498G0917779700.01.T05 | Hydroxyproline-rich glycoprotein family protein                         |
| maker-9-augustus-gene-198.50-mRNA-1 | Japonica | NA       |            | Os09g0509400 | OsR498G0917780100.01.T02 |                                                                         |
| maker-9-augustus-gene-198.55-mRNA-1 | Japonica | NA       |            | Os09g0507800 | OsR498G0917775000.01.T01 |                                                                         |
| maker-9-augustus-gene-198.60-mRNA-1 | Japonica | NA       |            | Os09g0508200 | OsR498G0917776400.01.T02 | Pollen-specific protein-like                                            |
| maker-9-augustus-gene-198.62-mRNA-1 | Japonica | Indica   |            | Os08g0535200 | OsR498G0917776800.01.T02 | Bidirectional sugar transporter SWEET                                   |
| maker-9-augustus-gene-198.64-mRNA-1 | Japonica | NA       |            | Os09g0508900 | OsR498G0917778000.01.T01 | Peroxisomal nicotinamide adenine dinucleotide carrier                   |
| maker-9-augustus-gene-198.73-mRNA-1 | Japonica | NA       |            | Os09g0509000 | OsR498G0917778400.01.T01 | Multiple organellar RNA editing factor 8 chloroplastic/mitochondrial    |
| maker-9-augustus-gene-198.78-mRNA-1 | Japonica | NA       |            | Os09g0509500 | OsR498G0917780400.01.T01 | Acyltransferase-like protein, chloroplastic                             |
| maker-9-augustus-gene-199.34-mRNA-1 | Japonica | NA       |            | Os09g0510200 | OsR498G0917782300.01.T01 | DUF667 domain-containing protein                                        |
| maker-9-augustus-gene-199.37-mRNA-1 | Japonica | NA       | Kinase-TM  |              | OsR498G0917786500.01.T01 | Chitin elicitor receptor kinase 1                                       |
| maker-9-augustus-gene-199.43-mRNA-1 | Japonica | NA       |            | Os09g0511500 | OsR498G0917787500.01.T03 | E3 ubiquitin-protein ligase RFI2-like                                   |
| maker-9-augustus-gene-199.47-mRNA-1 | Japonica | Indica   |            | Os08g0536300 | OsR498G0917780800.01.T01 | Zinc finger protein CONSTANS-LIKE 15-like                               |
| maker-9-augustus-gene-199.49-mRNA-1 | Japonica | NA       |            | Os09g0510500 | OsR498G0917783800.01.T03 | Transcription factor bHLH137                                            |
| maker-9-augustus-gene-199.53-mRNA-1 | Japonica | NA       |            | Os09g0510700 | OsR498G0917784600.01.T01 | ADP-ribosylation factor GTPase-activating protein AGD3                  |
| maker-9-augustus-gene-199.58-mRNA-1 | Japonica | NA       |            |              | OsR498G0917786200.01.T01 | Transcription factor MYB3R-4                                            |
| maker-9-augustus-gene-199.61-mRNA-1 | Japonica | NA       |            | Os09g0325220 | OsR498G0917786400.01.T02 | FBD domain-containing protein                                           |
| maker-9-augustus-gene-2.29-mRNA-1   | Japonica | NA       |            | Os09g0100800 |                          |                                                                         |
| maker-9-augustus-gene-20.57-mRNA-1  | Japonica | NA       |            |              |                          | Ankyrin-like protein-like protein                                       |
| maker-9-augustus-gene-200.49-mRNA-1 | Japonica | Japonica |            | Os09g0512000 | OsR498G0917788900.01.T01 |                                                                         |
| maker-9-augustus-gene-200.52-mRNA-1 | Japonica | NA       |            |              |                          |                                                                         |
| maker-9-augustus-gene-200.54-mRNA-1 | Japonica | NA       |            |              | OsR498G0917790500.01.T02 | Hsp70 nucleotide exchange factor fes1                                   |
| maker-9-augustus-gene-200.58-mRNA-1 | Japonica | Indica   |            | Os03g0851500 | OsR498G0917790700.01.T01 | DNA repair RAD52-like protein 2, chloroplastic                          |
| maker-9-augustus-gene-200.61-mRNA-1 | Japonica | NA       |            | Os09g0512900 | OsR498G0917791100.01.T01 | Plasma membrane                                                         |
| maker-9-augustus-gene-200.64-mRNA-1 | Japonica | NA       |            | Os09g0513000 | OsR498G0917791500.01.T02 | Ankyrin repeat domain-containing protein 2                              |
| maker-9-augustus-gene-200.69-mRNA-1 | Japonica | NA       |            |              | OsR498G0917791700.01.T01 | Phospholipase                                                           |
| maker-9-augustus-gene-200.74-mRNA-1 | Japonica | NA       |            | Os09g0511600 | OsR498G0917787800.01.T01 | 4-hydroxy-7-methoxy-3-oxo-3,4-dihydro-2H-1,4-benzoxazin-2-yl glucosideb |
| maker-9-augustus-gene-200.77-mRNA-1 | Japonica | Indica   |            | Os09g0511900 | OsR498G0917788200.01.T04 | 4-hydroxy-7-methoxy-3-oxo-3,4-dihydro-2H-1,4-benzoxazin-2-yl glucosideb |
| maker-9-augustus-gene-200.84-mRNA-1 | Japonica | Japonica |            | Os09g0511900 | OsR498G0917788200.01.T02 | 4-hydroxy-7-methoxy-3-oxo-3,4-dihydro-2H-1,4-benzoxazin-2-yl glucosideb |
| maker-9-augustus-gene-200.86-mRNA-1 | Japonica | NA       |            | Os09g0512100 |                          |                                                                         |
| maker-9-augustus-gene-200.88-mRNA-1 | Japonica | NA       |            | Os09g0513200 | OsR498G0917792000.01.T05 | Solute carrier family 35 member F1                                      |
| maker-9-augustus-gene-201.0-mRNA-1  | Japonica | Indica   | Kinase-TM  | Os01g0899000 | OsR498G0917792700.01.T02 | Putative Pto kinase interactor 1                                        |
| maker-9-augustus-gene-201.12-mRNA-1 | Japonica | NA       |            | Os09g0514100 | OsR498G0917793300.01.T01 | DAO domain-containing protein (Fragment)                                |
| maker-9-augustus-gene-201.17-mRNA-1 | Japonica | Indica   |            | Os09g0514300 | OsR498G0917794300.01.T03 | Processing isoform 1                                                    |
| maker-9-augustus-gene-201.22-mRNA-1 | Japonica | NA       |            | Os09g0514400 | OsR498G0917794500.01.T03 | Farnesyltransferase/type I geranylgeranyltransferase alpha subunit      |
| maker-9-augustus-gene-201.26-mRNA-1 | Japonica | NA       |            |              | OsR498G0917795100.01.T03 | Aleucone layer morphogenesis protein                                    |
| maker-9-augustus-gene-201.30-mRNA-1 | Japonica | Japonica |            | Os09g0514700 | OsR498G0917795700.01.T04 |                                                                         |
| maker-9-augustus-gene-201.33-mRNA-1 | Japonica | NA       |            | Os09g0514900 | OsR498G0917796100.01.T01 | Transcription factor like                                               |
| maker-9-augustus-gene-201.35-mRNA-1 | Japonica | NA       |            | Os09g0515100 | OsR498G0917796500.01.T01 | Cell division cycle protein 48-related / CDC48-related isoform 1        |
| maker-9-augustus-gene-201.4-mRNA-1  | Japonica | NA       |            | Os09g0513700 |                          | U11/U12 small nuclear ribonucleoprotein 35 kDa protein                  |
| maker-9-augustus-gene-201.42-mRNA-1 | Japonica | NA       |            |              |                          | Trigger factor like                                                     |
| maker-9-augustus-gene-201.47-mRNA-1 | Japonica | NA       | TM         | Os09g0515500 | OsR498G0917797500.01.T01 | Tr-type G domain-containing protein (Fragment)                          |
| maker-9-augustus-gene-201.51-mRNA-1 | Japonica | NA       |            | Os09g0513300 | OsR498G0917745200.01.T01 |                                                                         |
| maker-9-augustus-gene-201.52-mRNA-1 | Japonica | NA       |            |              | OsR498G0917792400.01.T02 |                                                                         |
| maker-9-augustus-gene-201.66-mRNA-1 | Japonica | NA       |            | Os09g0515200 | OsR498G0917796800.01.T01 | Proteasome endopeptidase complex                                        |
| maker-9-augustus-gene-201.69-mRNA-1 | Japonica | NA       |            |              | OsR498G0917797000.01.T04 | Proteasome endopeptidase complex                                        |
| maker-9-augustus-gene-201.7-mRNA-1  | Japonica | NA       |            | Os09g0513800 | OsR498G0917792900.01.T06 | probable E3 ubiquitin-protein ligase ARI7                               |
| maker-9-augustus-gene-202.0-mRNA-1  | Japonica | Indica   |            | Os09g0515700 | OsR498G0917797700.01.T04 | Tr-type G domain-containing protein                                     |
| maker-9-augustus-gene-202.12-mRNA-1 | Japonica | NA       |            | Os09g0516200 | OsR498G0917799000.01.T03 | Transcription factor RF2a                                               |
| maker-9-augustus-gene-202.15-mRNA-1 | Japonica | NA       |            | Os09g0516300 | OsR498G0917800000.01.T01 | Flowering time control protein FPA                                      |
| maker-9-augustus-gene-202.18-mRNA-1 | Japonica | NA       |            |              | OsR498G0917800600.01.T02 | Reticulon domain-containing protein                                     |
| maker-9-augustus-gene-202.25-mRNA-1 | Japonica | NA       |            | Os09g0516600 | OsR498G0917800800.01.T01 | Glyoxalase II                                                           |
| maker-9-augustus-gene-202.28-mRNA-1 | Japonica | Indica   |            | Os09g0516700 | OsR498G0917801000.01.T02 | PHD finger protein rhinoceros-like                                      |
| maker-9-augustus-gene-202.3-mRNA-1  | Japonica | NA       |            | Os09g0517000 |                          | Zinc transporter like                                                   |
| maker-9-augustus-gene-202.31-mRNA-1 | Japonica | NA       |            | Os09g0516900 | OsR498G0917802400.01.T01 | BAG-associated GRAM protein 1                                           |
| maker-9-augustus-gene-202.37-mRNA-1 | Japonica | NA       | CC-LRR-NBS |              | OsR498G0917802800.01.T01 | Pib variant protein (Fragment)                                          |
| maker-9-augustus-gene-202.41-mRNA-1 | Japonica | NA       | CC-NBS-TM  | Os09g0517200 | OsR498G0917803000.01.T01 | NB-ARC domain-containing protein (Fragment)                             |
| maker-9-augustus-gene-202.5-mRNA-1  | Japonica | NA       |            | Os09g0517600 | OsR498G0917803700.01.T01 | Formin-like protein 15                                                  |
| maker-9-augustus-gene-202.7-mRNA-1  | Japonica | NA       |            | Os09g0515800 | OsR498G0917798400.01.T02 | Rab-GAP TBC domain-containing protein                                   |

|                                     |          |          |  |              |                          |                                                                            |
|-------------------------------------|----------|----------|--|--------------|--------------------------|----------------------------------------------------------------------------|
| maker-9-augustus-gene-203.0-mRNA-1  | Japonica | NA       |  | Os09g0517900 | OsR498G0917804300.01.T01 | Glycosyltransferase                                                        |
| maker-9-augustus-gene-203.11-mRNA-1 | Japonica | Indica   |  | Os09g0518800 | OsR498G0917807300.01.T02 | N-terminal                                                                 |
| maker-9-augustus-gene-203.13-mRNA-1 | Japonica | NA       |  | Os09g0517700 | OsR498G0917804000.01.T02 | Thioesterase/thiol ester dehydrase-isomerase superfamily protein           |
| maker-9-augustus-gene-203.16-mRNA-1 | Japonica | NA       |  | Os09g0518600 | OsR498G0917806800.01.T02 | Inositol-tetrakisphosphate 1-kinase 4                                      |
| maker-9-augustus-gene-203.19-mRNA-1 | Japonica | NA       |  | Os09g0518700 | OsR498G0917807000.01.T03 | inositol-tetrakisphosphate 1-kinase 6 isoform X1                           |
| maker-9-augustus-gene-203.3-mRNA-1  | Japonica | NA       |  | Os09g0518200 | OsR498G0917805300.01.T01 | Glycosyltransferase                                                        |
| maker-9-augustus-gene-203.5-mRNA-1  | Japonica | Japonica |  | Os09g0518400 | OsR498G0917805700.01.T01 | Glycosyltransferase                                                        |
| maker-9-augustus-gene-203.8-mRNA-1  | Japonica | NA       |  | Os09g0518500 | OsR498G0917806500.01.T05 | Ankyrin repeat-containing protein                                          |
| maker-9-augustus-gene-204.28-mRNA-1 | Japonica | NA       |  | Os09g0520200 | OsR498G0917811300.01.T03 | Probable 1-acylglycerol-3-phosphate O-acyltransferase                      |
| maker-9-augustus-gene-204.35-mRNA-1 | Japonica | NA       |  |              |                          | BZIP domain-containing protein                                             |
| maker-9-augustus-gene-204.37-mRNA-1 | Japonica | NA       |  | Os09g0520700 | OsR498G0917813300.01.T01 | DEAD-box ATP-dependent RNA helicase 7                                      |
| maker-9-augustus-gene-204.42-mRNA-1 | Japonica | NA       |  | Os09g0521400 | OsR498G0917815700.01.T01 | Hydroxymethylglutaryl-CoA synthase                                         |
| maker-9-augustus-gene-204.48-mRNA-1 | Japonica | NA       |  | Os09g0520100 | OsR498G0917811200.01.T03 | Delta DNA polymerase                                                       |
| maker-9-augustus-gene-204.50-mRNA-1 | Japonica | NA       |  | Os09g0520500 | OsR498G0917812400.01.T01 | Zinc finger A20 and AN1 domain-containing stress-associated protein 1-like |
| maker-9-augustus-gene-204.53-mRNA-1 | Japonica | NA       |  | Os04g0379400 | OsR498G0408385000.01.T04 |                                                                            |
| maker-9-augustus-gene-204.56-mRNA-1 | Japonica | NA       |  | Os09g0520600 | OsR498G0917813000.01.T02 | Sodium/metabolite cotransporter like                                       |
| maker-9-augustus-gene-204.61-mRNA-1 | Japonica | NA       |  | Os09g0520800 | OsR498G0917813800.01.T01 | Alpha-L-fucosidase                                                         |
| maker-9-augustus-gene-205.35-mRNA-1 | Japonica | NA       |  |              | OsR498G0917816500.01.T01 | Flap endonuclease GEN-like protein 1                                       |
| maker-9-augustus-gene-205.38-mRNA-1 | Japonica | NA       |  | Os09g0521500 | OsR498G0917816000.01.T01 | ATPase ASNA                                                                |
| maker-9-augustus-gene-205.45-mRNA-1 | Japonica | NA       |  |              |                          |                                                                            |
| maker-9-augustus-gene-205.47-mRNA-1 | Japonica | NA       |  |              |                          |                                                                            |
| maker-9-augustus-gene-206.0-mRNA-1  | Japonica | NA       |  | Os09g0525200 | OsR498G0917825500.01.T01 | Ribosomal RNA processing protein 36                                        |
| maker-9-augustus-gene-206.10-mRNA-1 | Japonica | NA       |  | Os09g0525400 | OsR498G0917826400.01.T04 | E3 ubiquitin ligase BIG BROTHER                                            |
| maker-9-augustus-gene-206.15-mRNA-1 | Japonica | NA       |  | Os09g0525600 | OsR498G0917826800.01.T01 | Plant UBX domain-containing protein 8                                      |
| maker-9-augustus-gene-206.20-mRNA-1 | Japonica | NA       |  |              |                          | HAP2-GCS1 domain-containing protein (Fragment)                             |
| maker-9-augustus-gene-206.26-mRNA-1 | Japonica | NA       |  | Os09g0525900 | OsR498G0917827400.01.T02 | RHOMBOID-like protein (Fragment)                                           |
| maker-9-augustus-gene-206.4-mRNA-1  | Japonica | NA       |  | Os09g0525500 |                          | AAI domain-containing protein                                              |
| maker-9-augustus-gene-206.5-mRNA-1  | Japonica | NA       |  | Os09g0524800 | OsR498G0917824800.01.T01 | BCL-2-associated athanogene                                                |
| maker-9-augustus-gene-206.7-mRNA-1  | Japonica | NA       |  | Os09g0525300 | OsR498G0917825800.01.T02 | PP2 domain-containing protein                                              |
| maker-9-augustus-gene-207.35-mRNA-1 | Japonica | Japonica |  | Os09g0526000 | OsR498G0101550000.01.T03 | PORR domain-containing protein                                             |
| maker-9-augustus-gene-207.44-mRNA-1 | Japonica | NA       |  |              | OsR498G0917829000.01.T01 | Homeobox-leucine zipper protein ROC6                                       |
| maker-9-augustus-gene-207.49-mRNA-1 | Japonica | NA       |  | Os09g0526600 | OsR498G0917829800.01.T04 | Heat-responsive transcription factor                                       |
| maker-9-augustus-gene-208.10-mRNA-1 | Japonica | NA       |  | Os09g0528800 | OsR498G0917838600.01.T03 | Rab-GAP TBC domain-containing protein (Fragment)                           |
| maker-9-augustus-gene-208.13-mRNA-1 | Japonica | Indica   |  | Os09g0529100 | OsR498G0917839400.01.T01 | Probable 6-phosphogluconolactonase 4, chloroplastic                        |
| maker-9-augustus-gene-208.15-mRNA-1 | Japonica | NA       |  | Os09g0529300 | OsR498G0917840000.01.T01 | DUF295 domain-containing protein                                           |
| maker-9-augustus-gene-208.17-mRNA-1 | Japonica | NA       |  |              | OsR498G0917840400.01.T03 | Vacuolar protein sorting-associated protein 1 (Fragment)                   |
| maker-9-augustus-gene-208.5-mRNA-1  | Japonica | NA       |  | Os09g0528700 | OsR498G0917836900.01.T01 | Cytochrome P450 family 78 subfamily A polypeptide 8                        |
| maker-9-augustus-gene-209.35-mRNA-1 | Japonica | NA       |  | Os09g0530200 | OsR498G0917841700.01.T02 | Endoglucanase                                                              |
| maker-9-augustus-gene-209.37-mRNA-1 | Japonica | NA       |  |              | OsR498G0917842100.01.T01 | Premnaspirodiene oxygenase                                                 |
| maker-9-augustus-gene-209.39-mRNA-1 | Japonica | NA       |  | Os09g0530300 | OsR498G0917842900.01.T01 | Endoglucanase                                                              |
| maker-9-augustus-gene-209.41-mRNA-1 | Japonica | NA       |  |              |                          | Zinc finger CCCH domain-containing protein 44                              |
| maker-9-augustus-gene-209.46-mRNA-1 | Japonica | NA       |  | Os09g0530700 | OsR498G0917843700.01.T03 |                                                                            |
| maker-9-augustus-gene-209.51-mRNA-1 | Japonica | NA       |  | Os09g0530800 | OsR498G0917844300.01.T01 | Subtilisin-like protease                                                   |
| maker-9-augustus-gene-209.55-mRNA-1 | Japonica | NA       |  | Os09g0531100 | OsR498G0917844800.01.T04 | Ribosomal RNA small subunit methyltransferase H (Fragment)                 |
| maker-9-augustus-gene-209.60-mRNA-1 | Japonica | NA       |  | Os09g0531200 | OsR498G0917845200.01.T01 | RRM domain-containing protein (Fragment)                                   |
| maker-9-augustus-gene-209.62-mRNA-1 | Japonica | Indica   |  | Os09g0531600 | OsR498G0917846800.01.T01 | Protein SHORT INTERNODES                                                   |
| maker-9-augustus-gene-21.33-mRNA-1  | Japonica | NA       |  |              | OsR498G0916732700.01.T02 | Tetratricopeptide repeat protein-like                                      |
| maker-9-augustus-gene-21.36-mRNA-1  | Japonica | NA       |  | Os09g0125100 | OsR498G0916727400.01.T01 | CUE domain-containing protein                                              |
| maker-9-augustus-gene-21.38-mRNA-1  | Japonica | NA       |  |              | OsR498G0916728800.01.T01 |                                                                            |
| maker-9-augustus-gene-210.19-mRNA-1 | Japonica | NA       |  | Os09g0531900 | OsR498G0917849000.01.T01 | Hexosyltransferase                                                         |
| maker-9-augustus-gene-210.24-mRNA-1 | Japonica | NA       |  | Os09g0532000 | OsR498G0917849600.01.T01 | Senescence-inducible chloroplast non-yellowing protein 1                   |
| maker-9-augustus-gene-210.26-mRNA-1 | Japonica | NA       |  | Os09g0532400 | OsR498G0917850800.01.T01 | Two-component response regulator-like PRR95                                |
| maker-9-augustus-gene-211.0-mRNA-1  | Japonica | Indica   |  | Os08g0548200 | OsR498G0917856500.01.T01 | ER lumen protein-retaining receptor                                        |
| maker-9-augustus-gene-211.12-mRNA-1 | Japonica | NA       |  | Os09g0535100 | OsR498G0917858700.01.T01 | E3 ubiquitin ligase BIG BROTHER-related                                    |
| maker-9-augustus-gene-211.17-mRNA-1 | Japonica | NA       |  | Os09g0535200 |                          | Putative vegetative cell wall protein gp1precursor                         |
| maker-9-augustus-gene-211.23-mRNA-1 | Japonica | NA       |  |              | OsR498G0917855600.01.T01 |                                                                            |
| maker-9-augustus-gene-211.25-mRNA-1 | Japonica | NA       |  | Os09g0533900 | OsR498G0917855800.01.T01 | Endoglucanase                                                              |
| maker-9-augustus-gene-211.30-mRNA-1 | Japonica | NA       |  | Os09g0534000 |                          | Adipose-regulatory protein                                                 |
| maker-9-augustus-gene-211.7-mRNA-1  | Japonica | NA       |  |              |                          | Heat shock cognate protein 80                                              |
| maker-9-augustus-gene-211.9-mRNA-1  | Japonica | NA       |  | Os09g0534800 | OsR498G0917858300.01.T01 | TFIIB-type domain-containing protein                                       |
| maker-9-augustus-gene-212.47-mRNA-1 | Japonica | NA       |  | Os09g0535300 | OsR498G0917860100.01.T02 | Xap5 circadian timekeeper isoform 1                                        |

|                                     |          |          |           |              |                          |                                                                   |
|-------------------------------------|----------|----------|-----------|--------------|--------------------------|-------------------------------------------------------------------|
| maker-9-augustus-gene-212.52-mRNA-1 | Japonica | NA       |           |              | OsR498G0613143800.01.T01 | CRIB domain-containing protein                                    |
| maker-9-augustus-gene-212.60-mRNA-1 | Japonica | NA       |           |              |                          | Apurinic-apyrimidinic endonuclease 2                              |
| maker-9-augustus-gene-213.38-mRNA-1 | Japonica | NA       |           | Os09g0537600 | OsR498G0917870900.01.T01 | Peptidyl-prolyl cis-trans isomerase                               |
| maker-9-augustus-gene-213.42-mRNA-1 | Japonica | NA       |           | Os09g0537800 |                          | 54S ribosomal protein L37                                         |
| maker-9-augustus-gene-213.44-mRNA-1 | Japonica | NA       |           | Os09g0538200 | OsR498G0917872700.01.T01 | Proteasome endopeptidase complex                                  |
| maker-9-augustus-gene-213.46-mRNA-1 | Japonica | NA       |           | Os09g0538500 | OsR498G0917875900.01.T01 | Tetratricopeptide repeat-containing domain                        |
| maker-9-augustus-gene-213.50-mRNA-1 | Japonica | Indica   |           | Os09g0539200 | OsR498G0917878700.01.T04 | Beta-galactosidase                                                |
| maker-9-augustus-gene-213.57-mRNA-1 | Japonica | Japonica |           | Os09g0539400 | OsR498G0917879100.01.T01 | zf-primase domain-containing protein                              |
| maker-9-augustus-gene-213.59-mRNA-1 | Japonica | NA       |           | Os09g0537700 | OsR498G0917871200.01.T01 | Ribonuclease 3                                                    |
| maker-9-augustus-gene-213.61-mRNA-1 | Japonica | NA       |           | Os09g0538000 | OsR498G0917872200.01.T01 | Extracellular ribonuclease LE                                     |
| maker-9-augustus-gene-213.64-mRNA-1 | Japonica | NA       |           | Os09g0538400 | OsR498G0917875600.01.T01 | Transcription repressor MYB4                                      |
| maker-9-augustus-gene-213.66-mRNA-1 | Japonica | NA       |           |              | OsR498G0917876200.01.T03 | L-ascorbate peroxidase                                            |
| maker-9-augustus-gene-213.72-mRNA-1 | Japonica | NA       |           | Os09g0538800 | OsR498G0917877800.01.T04 | Calcium lipid binding protein-like                                |
| maker-9-augustus-gene-213.82-mRNA-1 | Japonica | NA       |           | Os09g0539100 | OsR498G0917878400.01.T01 | 3-dehydroquinate synthase chloroplastic                           |
| maker-9-augustus-gene-213.85-mRNA-1 | Japonica | Indica   |           | Os11g0456300 | OsR498G0917879400.01.T03 | Fimbriata-associated protein (Fragment)                           |
| maker-9-augustus-gene-214.0-mRNA-1  | Japonica | NA       |           | Os09g0540600 | OsR498G0917882300.01.T01 | Histone-binding protein MS11                                      |
| maker-9-augustus-gene-214.10-mRNA-1 | Japonica | NA       |           | Os09g0540400 | OsR498G0917882000.01.T01 | GDSL esterase/lipase                                              |
| maker-9-augustus-gene-214.12-mRNA-1 | Japonica | Japonica |           | Os09g0540900 | OsR498G0917883600.01.T04 | HTH La-type RNA-binding domain-containing protein                 |
| maker-9-augustus-gene-214.18-mRNA-1 | Japonica | NA       |           |              |                          | Trafficking protein particle complex subunit                      |
| maker-9-augustus-gene-214.2-mRNA-1  | Japonica | Indica   |           | Os09g0541000 | OsR498G0917884300.01.T01 | Aquaporin (Major intrinsic protein family)                        |
| maker-9-augustus-gene-214.21-mRNA-1 | Japonica | NA       |           | Os09g0541900 | OsR498G0917887000.01.T01 | 26S proteasome non-ATPase regulatory subunit 3                    |
| maker-9-augustus-gene-214.24-mRNA-1 | Japonica | Japonica |           | Os09g0542000 | OsR498G0917887200.01.T01 | DNA-binding protein alba protein                                  |
| maker-9-augustus-gene-214.30-mRNA-1 | Japonica | NA       |           | Os09g0542100 |                          | Peptidase A1 domain-containing protein                            |
| maker-9-augustus-gene-214.4-mRNA-1  | Japonica | NA       |           | Os09g0541700 | OsR498G0917886700.01.T01 | Rossmann-like alpha/beta/alpha sandwich fold                      |
| maker-9-augustus-gene-214.7-mRNA-1  | Japonica | Indica   |           | Os08g0549300 | OsR498G0917880200.01.T01 | Acyl carrier protein 2, chloroplastic                             |
| maker-9-augustus-gene-215.0-mRNA-1  | Japonica | NA       |           |              | OsR498G0917889100.01.T02 | DUF632 domain-containing protein/DUF630 domain-containing protein |
| maker-9-augustus-gene-215.2-mRNA-1  | Japonica | NA       |           | Os09g0543100 | OsR498G0917891100.01.T02 | Phospholipase D                                                   |
| maker-9-augustus-gene-215.7-mRNA-1  | Japonica | NA       |           | Os09g0542200 | OsR498G0917888000.01.T01 | Aspartyl protease family protein 1-like protein                   |
| maker-9-augustus-gene-216.11-mRNA-1 | Japonica | NA       |           |              | OsR498G0917898000.01.T01 | high mobility group B protein 9                                   |
| maker-9-augustus-gene-216.13-mRNA-1 | Japonica | NA       |           |              | OsR498G0917899000.01.T01 | Coiled-coil domain-containing protein 130                         |
| maker-9-augustus-gene-216.15-mRNA-1 | Japonica | NA       |           | Os09g0544800 | OsR498G0917899200.01.T02 | Rop guanine nucleotide exchange factor like                       |
| maker-9-augustus-gene-216.18-mRNA-1 | Japonica | NA       |           | Os09g0544900 | OsR498G0917900200.01.T04 | Enoyl-CoA hydratase 2 peroxisomal                                 |
| maker-9-augustus-gene-217.0-mRNA-1  | Japonica | NA       |           | Os09g0547300 | OsR498G0917909500.01.T07 | DUF632 domain-containing protein                                  |
| maker-9-augustus-gene-217.4-mRNA-1  | Japonica | NA       |           | Os09g0547500 | OsR498G0917910100.01.T01 | Cytokinin riboside 5'-monophosphate phosphoribohydrolase          |
| maker-9-augustus-gene-218.0-mRNA-1  | Japonica | NA       |           | Os09g0547800 | OsR498G0917911300.01.T02 | U11/U12 small nuclear ribonucleoprotein 31 kDa protein            |
| maker-9-augustus-gene-218.12-mRNA-1 | Japonica | NA       | LRR-TM    | Os09g0548200 | OsR498G0917912500.01.T01 | Chitin elicitor-binding protein                                   |
| maker-9-augustus-gene-218.14-mRNA-1 | Japonica | NA       |           |              |                          | Protein DETOXIFICATION 45 chloroplastic                           |
| maker-9-augustus-gene-218.18-mRNA-1 | Japonica | NA       |           | Os09g0549400 | OsR498G0917916100.01.T01 |                                                                   |
| maker-9-augustus-gene-218.24-mRNA-1 | Japonica | NA       |           | Os09g0549600 | OsR498G0917917300.01.T02 | HMA domain-containing protein                                     |
| maker-9-augustus-gene-218.26-mRNA-1 | Japonica | NA       |           | Os09g0548400 | OsR498G0917913000.01.T02 | Flavin-containing monooxygenase                                   |
| maker-9-augustus-gene-218.29-mRNA-1 | Japonica | Indica   |           | Os09g0548700 | OsR498G0917913400.01.T01 | Flavin-containing monooxygenase                                   |
| maker-9-augustus-gene-218.3-mRNA-1  | Japonica | NA       |           |              | OsR498G0917911500.01.T05 | DUF629 domain-containing protein                                  |
| maker-9-augustus-gene-218.32-mRNA-1 | Japonica | NA       |           | Os09g0549300 | OsR498G0917915800.01.T01 | Flavin-containing monooxygenase                                   |
| maker-9-augustus-gene-218.7-mRNA-1  | Japonica | NA       |           |              | OsR498G0917912100.01.T03 | O-fucosyltransferase family protein (Fragment)                    |
| maker-9-augustus-gene-219.29-mRNA-1 | Japonica | NA       |           | Os09g0551300 | OsR498G0917922900.01.T01 | 25S rRNA (Cytosine-C(5))-methyltransferase nop2-like              |
| maker-9-augustus-gene-219.38-mRNA-1 | Japonica | Indica   | Kinase-TM | Os09g0551500 | OsR498G0917921800.01.T02 | Non-specific serine/threonine protein kinase (Fragment)           |
| maker-9-augustus-gene-219.40-mRNA-1 | Japonica | NA       |           | Os09g0550000 | OsR498G0917917800.01.T02 | DNA-binding bromodomain-containing protein                        |
| maker-9-augustus-gene-219.45-mRNA-1 | Japonica | NA       | Kinase-TM |              |                          | Non-specific serine/threonine protein kinase (Fragment)           |
| maker-9-augustus-gene-219.47-mRNA-1 | Japonica | NA       | Kinase-TM | Os09g0550500 |                          | Non-specific serine/threonine protein kinase (Fragment)           |
| maker-9-augustus-gene-219.50-mRNA-1 | Japonica | NA       | Kinase-TM |              |                          | Non-specific serine/threonine protein kinase                      |
| maker-9-augustus-gene-219.52-mRNA-1 | Japonica | NA       | Kinase-TM |              | OsR498G0917920000.01.T01 | Serine/threonine-protein kinase                                   |
| maker-9-augustus-gene-219.54-mRNA-1 | Japonica | Indica   | Kinase-TM | Os09g0551500 | OsR498G0917921800.01.T01 | Non-specific serine/threonine protein kinase                      |
| maker-9-augustus-gene-22.4-mRNA-1   | Japonica | Indica   |           | Os09g0250800 | OsR498G0916734200.01.T01 | ABC transporter domain-containing protein (Fragment)              |
| maker-9-augustus-gene-22.8-mRNA-1   | Japonica | NA       |           | Os09g0127300 | OsR498G0916736800.01.T01 | Cinnamoyl-CoA reductase                                           |
| maker-9-augustus-gene-220.0-mRNA-1  | Japonica | NA       |           | Os09g0551600 | OsR498G0917924100.01.T05 | High mobility group box domain                                    |
| maker-9-augustus-gene-220.13-mRNA-1 | Japonica | NA       |           | Os09g0553600 | OsR498G0917928300.01.T02 | Quinolinate phosphoribosyltransferase [decarboxylating]           |
| maker-9-augustus-gene-220.19-mRNA-1 | Japonica | Indica   |           | Os09g0551800 | OsR498G0917924400.01.T05 | Fanconi anemia group J protein homolog                            |
| maker-9-augustus-gene-220.22-mRNA-1 | Japonica | NA       |           |              |                          | MUTL protein homolog 3                                            |
| maker-9-augustus-gene-220.26-mRNA-1 | Japonica | NA       | Kinase-TM | Os09g0552300 | OsR498G0917924800.01.T01 | Serine/threonine-protein kinase afc3                              |
| maker-9-augustus-gene-220.29-mRNA-1 | Japonica | Japonica |           | Os09g0552400 | OsR498G0917925800.01.T01 | Cupin type-1 domain-containing protein                            |
| maker-9-augustus-gene-220.3-mRNA-1  | Japonica | NA       |           |              | OsR498G0917926100.01.T01 | NAC domain-containing protein 86                                  |

|                                     |          |          |               |              |                          |                                                                          |
|-------------------------------------|----------|----------|---------------|--------------|--------------------------|--------------------------------------------------------------------------|
| maker-9-augustus-gene-220.31-mRNA-1 | Japonica | Japonica |               | Os09g0552500 | OsR498G0917925800.01.T01 | Cupin type-1 domain-containing protein                                   |
| maker-9-augustus-gene-220.33-mRNA-1 | Japonica | NA       |               | Os09g0552600 | OsR498G0917925800.01.T01 | Cupin type-1 domain-containing protein                                   |
| maker-9-augustus-gene-220.35-mRNA-1 | Japonica | Indica   |               | Os09g0553300 | OsR498G0917928000.01.T01 | Nudix hydrolase                                                          |
| maker-9-augustus-gene-220.5-mRNA-1  | Japonica | NA       |               | Os09g0552900 | OsR498G0917926500.01.T03 | NAC domain-containing protein 74                                         |
| maker-9-augustus-gene-220.7-mRNA-1  | Japonica | NA       |               | Os09g0553200 | OsR498G0917927700.01.T01 | UTP--glucose-1-phosphate uridylyltransferase                             |
| maker-9-augustus-gene-221.0-mRNA-1  | Japonica | NA       |               | Os09g0554300 | OsR498G0917931100.01.T01 | Auxin efflux carrier                                                     |
| maker-9-augustus-gene-221.30-mRNA-1 | Japonica | Indica   |               | Os09g0554000 | OsR498G0917929400.01.T01 | Mitochondrial phosphate carrier protein like                             |
| maker-9-augustus-gene-221.35-mRNA-1 | Japonica | NA       |               | Os09g0555500 | OsR498G0917935000.01.T01 | Phytoene synthase, chloroplastic                                         |
| maker-9-augustus-gene-221.5-mRNA-1  | Japonica | Japonica |               | Os09g0555100 | OsR498G0917931100.01.T02 | Auxin efflux carrier                                                     |
| maker-9-augustus-gene-221.7-mRNA-1  | Japonica | NA       |               |              | OsR498G0917933900.01.T05 | DNA-directed RNA polymerase subunit                                      |
| maker-9-augustus-gene-221.8-mRNA-1  | Japonica | NA       |               |              | OsR498G0917933900.01.T01 | DNA-directed RNA polymerase subunit                                      |
| maker-9-augustus-gene-222.0-mRNA-1  | Japonica | NA       |               | Os09g0556200 | OsR498G0917939500.01.T02 | Tetratricopeptide repeat 1                                               |
| maker-9-augustus-gene-222.13-mRNA-1 | Japonica | NA       |               | Os09g0555800 | OsR498G0917938400.01.T01 | Benzoate--CoA ligase, peroxisomal                                        |
| maker-9-augustus-gene-222.15-mRNA-1 | Japonica | NA       |               |              | OsR498G0917939200.01.T01 | Signal peptidase subunit                                                 |
| maker-9-augustus-gene-222.2-mRNA-1  | Japonica | NA       |               |              |                          | Histone-lysine N-methyltransferase ATX4                                  |
| maker-9-augustus-gene-222.20-mRNA-1 | Japonica | NA       |               |              |                          | Putative anion transporter 5, chloroplastic                              |
| maker-9-augustus-gene-222.22-mRNA-1 | Japonica | NA       |               | Os09g0556500 | OsR498G0917940000.01.T06 | CysteinyI-tRNA synthetase                                                |
| maker-9-augustus-gene-222.25-mRNA-1 | Japonica | NA       |               | Os09g0556800 | OsR498G0917940400.01.T01 | Uveal autoantigen with coiled-coil domains and ankyrin repeats isoform 1 |
| maker-9-augustus-gene-222.9-mRNA-1  | Japonica | NA       |               | Os09g0556600 | OsR498G0917935800.01.T03 | Protein ACCUMULATION AND REPLICATION OF CHLOROPLASTS 3                   |
| maker-9-augustus-gene-223.45-mRNA-1 | Japonica | NA       |               | Os09g0557300 |                          | DUF1618 domain-containing protein (Fragment)                             |
| maker-9-augustus-gene-223.48-mRNA-1 | Japonica | NA       |               | Os09g0557800 | OsR498G0917942100.01.T01 | Transmembrane 9 superfamily member                                       |
| maker-9-augustus-gene-223.52-mRNA-1 | Japonica | NA       |               | Os09g0557900 | OsR498G0917942300.01.T01 | Phytoeyanin domain-containing protein (Fragment)                         |
| maker-9-augustus-gene-223.54-mRNA-1 | Japonica | NA       |               | Os09g0558100 | OsR498G0917942900.01.T01 | Stress-induced hydrophobic peptide                                       |
| maker-9-augustus-gene-223.56-mRNA-1 | Japonica | NA       |               |              |                          | Cyclic nucleotide-gated ion channel                                      |
| maker-9-augustus-gene-223.61-mRNA-1 | Japonica | NA       |               | Os09g0558600 |                          |                                                                          |
| maker-9-augustus-gene-223.65-mRNA-1 | Japonica | NA       |               | Os09g0559800 | OsR498G0917947500.01.T02 | Organic cation/carnitine transporter 7                                   |
| maker-9-augustus-gene-223.67-mRNA-1 | Japonica | NA       | Kinase-LRR-TM | Os09g0559900 | OsR498G0917947700.01.T02 | STRUBBELIG-receptor family 6                                             |
| maker-9-augustus-gene-223.70-mRNA-1 | Japonica | NA       |               | Os09g0557400 | OsR498G0917941200.01.T01 | Mitochondrial glycoprotein family protein (Fragment)                     |
| maker-9-augustus-gene-223.73-mRNA-1 | Japonica | Indica   |               | Os09g0557500 | OsR498G0917941600.01.T02 | Purine permease                                                          |
| maker-9-augustus-gene-223.75-mRNA-1 | Japonica | NA       |               | Os09g0558000 | OsR498G0917942600.01.T01 | Protein-serine/threonine phosphatase                                     |
| maker-9-augustus-gene-223.80-mRNA-1 | Japonica | NA       |               | Os09g0558900 | OsR498G0917945200.01.T01 | NADPH--cytochrome P450 reductase                                         |
| maker-9-augustus-gene-223.88-mRNA-1 | Japonica | NA       |               | Os09g0559200 |                          | RING-type domain-containing protein                                      |
| maker-9-augustus-gene-224.0-mRNA-1  | Japonica | NA       |               | Os09g0560200 |                          | Transcription termination factor MTERF2, chloroplastic                   |
| maker-9-augustus-gene-224.12-mRNA-1 | Japonica | NA       |               | Os09g0560600 | OsR498G0917948700.01.T08 | ALA-interacting subunit                                                  |
| maker-9-augustus-gene-224.14-mRNA-1 | Japonica | NA       |               | Os09g0560700 | OsR498G0917948900.01.T02 | Mitochondrial amidoxime reducing component 2                             |
| maker-9-augustus-gene-224.19-mRNA-1 | Japonica | NA       |               | Os09g0560800 | OsR498G0917949100.01.T01 | Mitochondrial amidoxime reducing component 2                             |
| maker-9-augustus-gene-224.22-mRNA-1 | Japonica | Japonica | Kinase-TM     | Os09g0561500 | OsR498G0917950700.01.T01 | Wall-associated receptor kinase 3                                        |
| maker-9-augustus-gene-224.23-mRNA-1 | Japonica | NA       | CC-Kinase-TM  | Os09g0561600 | OsR498G0917952300.01.T01 | Wall-associated receptor kinase 3                                        |
| maker-9-augustus-gene-224.31-mRNA-1 | Japonica | Japonica |               | Os09g0562300 | OsR498G1019198700.01.T01 | Homeobox-leucine zipper protein HOX1                                     |
| maker-9-augustus-gene-224.32-mRNA-1 | Japonica | NA       |               |              |                          | FBD domain-containing protein                                            |
| maker-9-augustus-gene-224.4-mRNA-1  | Japonica | NA       |               |              | OsR498G0917948700.01.T03 | E3 ubiquitin-protein ligase HERC2                                        |
| maker-9-augustus-gene-224.41-mRNA-1 | Japonica | NA       |               | Os09g0560000 | OsR498G0917948000.01.T01 | TOG domain-containing protein                                            |
| maker-9-augustus-gene-224.45-mRNA-1 | Japonica | Indica   |               | Os09g0560400 | OsR498G0917948600.01.T01 | Structural polyprotein                                                   |
| maker-9-augustus-gene-224.49-mRNA-1 | Japonica | NA       |               |              | OsR498G0917949600.01.T01 | Suppressor of FRI 4 protein isoform X1                                   |
| maker-9-augustus-gene-224.9-mRNA-1  | Japonica | NA       |               | Os09g0560500 | OsR498G0917948700.01.T07 | 7,8-dihydroneopterin aldolase                                            |
| maker-9-augustus-gene-225.30-mRNA-1 | Japonica | Indica   |               | Os09g0563250 | OsR498G0917955300.01.T01 | S-acyltransferase                                                        |
| maker-9-augustus-gene-225.34-mRNA-1 | Japonica | NA       |               |              | OsR498G0917955500.01.T01 | ruBisCO large subunit-binding protein subunit alpha                      |
| maker-9-augustus-gene-225.41-mRNA-1 | Japonica | NA       |               | Os09g0563700 | OsR498G0917955900.01.T01 | DCD domain-containing protein (Fragment)                                 |
| maker-9-augustus-gene-225.43-mRNA-1 | Japonica | NA       |               |              | OsR498G1221160700.01.T01 | Transposon protein, putative, CACTA, En/Spm sub-class                    |
| maker-9-augustus-gene-225.46-mRNA-1 | Japonica | Indica   |               | Os09g0563200 | OsR498G0917955200.01.T01 | Potassium transporter                                                    |
| maker-9-augustus-gene-225.54-mRNA-1 | Japonica | NA       |               | Os09g0563800 |                          |                                                                          |
| maker-9-augustus-gene-225.55-mRNA-1 | Japonica | NA       |               | Os09g0563800 | OsR498G0917956200.01.T02 |                                                                          |
| maker-9-augustus-gene-225.64-mRNA-1 | Japonica | NA       |               | Os09g0564000 | OsR498G0917957000.01.T01 | Vignain                                                                  |
| maker-9-augustus-gene-226.40-mRNA-1 | Japonica | NA       |               |              |                          | Nuclear pore complex protein GP210                                       |
| maker-9-augustus-gene-226.47-mRNA-1 | Japonica | NA       |               |              | OsR498G0917960900.01.T06 | Sterol C-14 reductase                                                    |
| maker-9-augustus-gene-226.52-mRNA-1 | Japonica | Indica   |               | Os09g0564200 | OsR498G0917957400.01.T01 | Oryzain alpha chain like                                                 |
| maker-9-augustus-gene-226.53-mRNA-1 | Japonica | NA       |               | Os09g0564600 | OsR498G0917958800.01.T01 | Cystein protease                                                         |
| maker-9-augustus-gene-226.54-mRNA-1 | Japonica | NA       |               | Os09g0564600 | OsR498G0917958800.01.T01 | Xylem cysteine proteinase 1                                              |
| maker-9-augustus-gene-226.80-mRNA-1 | Japonica | NA       |               | Os09g0565100 |                          | KDEL-tailed cysteine endopeptidase CEP1                                  |
| maker-9-augustus-gene-226.82-mRNA-1 | Japonica | NA       |               |              |                          | Putative nucleic acid-binding protein                                    |
| maker-9-augustus-gene-226.84-mRNA-1 | Japonica | NA       |               | Os09g0565200 | OsR498G0917960200.01.T01 | 31 kDa ribonucleoprotein, chloroplastic                                  |

|                                     |          |          |              |              |                          |                                                                      |
|-------------------------------------|----------|----------|--------------|--------------|--------------------------|----------------------------------------------------------------------|
| maker-9-augustus-gene-226.87-mRNA-1 | Japonica | NA       |              |              | OsR498G0917960200.01.T05 | Copine domain-containing protein                                     |
| maker-9-augustus-gene-226.89-mRNA-1 | Japonica | NA       |              |              | OsR498G0917960400.01.T01 | RRM domain-containing protein                                        |
| maker-9-augustus-gene-226.91-mRNA-1 | Japonica | NA       |              | Os09g0565400 | OsR498G0917960600.01.T01 | ELKS/Rab6-interacting/CAST family member 1-like isoform X3           |
| maker-9-augustus-gene-227.0-mRNA-1  | Japonica | NA       |              |              | OsR498G0917964300.01.T02 |                                                                      |
| maker-9-augustus-gene-227.10-mRNA-1 | Japonica | NA       | Kinase-TM    |              | OsR498G0917964200.01.T02 | Tyrosine kinase                                                      |
| maker-9-augustus-gene-227.4-mRNA-1  | Japonica | NA       |              | Os09g0565900 |                          |                                                                      |
| maker-9-augustus-gene-227.6-mRNA-1  | Japonica | NA       |              | Os09g0566100 | OsR498G0917963000.01.T01 | Polyadenylation and cleavage factor like                             |
| maker-9-augustus-gene-227.8-mRNA-1  | Japonica | Indica   |              | Os09g0566400 | OsR498G0917963800.01.T01 | Protein kinase domain-containing protein                             |
| maker-9-augustus-gene-228.12-mRNA-1 | Japonica | NA       |              | Os09g0567700 | OsR498G0917968500.01.T01 |                                                                      |
| maker-9-augustus-gene-228.15-mRNA-1 | Japonica | NA       |              |              | OsR498G0917969500.01.T05 | Single-stranded nucleic acid binding R3H protein isoform 1           |
| maker-9-augustus-gene-228.18-mRNA-1 | Japonica | NA       |              | Os09g0568900 | OsR498G0917971300.01.T01 | Copper ion binding isoform 1                                         |
| maker-9-augustus-gene-228.2-mRNA-1  | Japonica | NA       |              | Os09g0567350 | OsR498G0917967100.01.T06 | flagellar radial spoke protein 5                                     |
| maker-9-augustus-gene-228.20-mRNA-1 | Japonica | NA       |              |              | OsR498G0917971900.01.T02 | Beta-amylase                                                         |
| maker-9-augustus-gene-228.26-mRNA-1 | Japonica | NA       |              |              |                          | E3 ubiquitin ligase                                                  |
| maker-9-augustus-gene-228.28-mRNA-1 | Japonica | NA       | CC-Kinase-TM | Os09g0569800 | OsR498G0917973100.01.T01 | E3 ubiquitin ligase                                                  |
| maker-9-augustus-gene-228.32-mRNA-1 | Japonica | NA       |              | Os09g0567800 | OsR498G0917968800.01.T02 | GDSL esterase/lipase                                                 |
| maker-9-augustus-gene-228.36-mRNA-1 | Japonica | NA       |              | Os09g0567900 | OsR498G0917969200.01.T01 | Uridine nucleosidase 1                                               |
| maker-9-augustus-gene-228.40-mRNA-1 | Japonica | Indica   |              | Os09g0568200 | OsR498G0917969800.01.T01 | DNA polymerase epsilon subunit like                                  |
| maker-9-augustus-gene-228.43-mRNA-1 | Japonica | NA       |              | Os09g0568800 | OsR498G0917971200.01.T01 | 40S ribosomal protein S25                                            |
| maker-9-augustus-gene-228.46-mRNA-1 | Japonica | NA       |              |              | OsR498G0917972200.01.T01 | Putative lipase/calmodulin-binding heat-shock protein                |
| maker-9-augustus-gene-228.49-mRNA-1 | Japonica | NA       |              | Os09g0569400 | OsR498G0917972400.01.T02 | Cleavage and polyadenylation specificity factor subunit 2            |
| maker-9-augustus-gene-229.5-mRNA-1  | Japonica | NA       |              | Os09g0567400 | OsR498G0917967300.01.T01 | Histidine-containing phosphotransfer protein 2                       |
| maker-9-augustus-gene-228.9-mRNA-1  | Japonica | NA       |              | Os09g0567500 | OsR498G0917968100.01.T01 | Fatty acyl-CoA reductase                                             |
| maker-9-augustus-gene-229.0-mRNA-1  | Japonica | Indica   | CC-Kinase-TM | Os09g0570000 | OsR498G0917973500.01.T05 | E3 ubiquitin ligase                                                  |
| maker-9-augustus-gene-229.13-mRNA-1 | Japonica | NA       |              | Os09g0570300 | OsR498G0917974100.01.T01 | Short-chain dehydrogenase TIC 32 chloroplastic                       |
| maker-9-augustus-gene-229.17-mRNA-1 | Japonica | NA       |              | Os09g0570400 | OsR498G0917974300.01.T01 | Ascorbate transporter chloroplastic                                  |
| maker-9-augustus-gene-229.21-mRNA-1 | Japonica | Indica   |              | Os09g0570500 | OsR498G0917974900.01.T02 | Protein neuralized like                                              |
| maker-9-augustus-gene-229.26-mRNA-1 | Japonica | Indica   |              | Os08g0559900 | OsR498G0917975100.01.T02 | Nucleotidyltransferase family protein                                |
| maker-9-augustus-gene-229.33-mRNA-1 | Japonica | Indica   |              | Os09g0570900 | OsR498G0917976200.01.T01 | ACT domain                                                           |
| maker-9-augustus-gene-229.4-mRNA-1  | Japonica | Indica   | CC-Kinase-TM | Os09g0570100 | OsR498G0917973700.01.T02 | U-box domain-containing protein 33                                   |
| maker-9-augustus-gene-229.43-mRNA-1 | Japonica | Japonica |              | Os09g0571000 | OsR498G0917977400.01.T01 | Protein UPSTREAM OF FLC                                              |
| maker-9-augustus-gene-229.47-mRNA-1 | Japonica | NA       |              | Os09g0571500 | OsR498G0917978400.01.T01 | Sn1-specific diacylglycerol lipase alpha                             |
| maker-9-augustus-gene-229.8-mRNA-1  | Japonica | NA       |              | Os09g0570200 | OsR498G0917973900.01.T05 | Transcription factor hamlet                                          |
| maker-9-augustus-gene-230.0-mRNA-1  | Japonica | NA       |              | Os09g0127800 | OsR498G0916739400.01.T02 | Coatomer subunit alpha                                               |
| maker-9-augustus-gene-230.44-mRNA-1 | Japonica | NA       |              | Os09g0572500 | OsR498G0917982100.01.T01 | Glucomannan 4-beta-mannosyltransferase 2                             |
| maker-9-augustus-gene-230.46-mRNA-1 | Japonica | NA       | Kinase-TM    | Os09g0572600 | OsR498G0917982500.01.T01 | probable serine/threonine-protein kinase PBL23                       |
| maker-9-augustus-gene-230.50-mRNA-1 | Japonica | NA       |              |              | OsR498G0917984100.01.T02 | Type I inositol polyphosphate 5-phosphatase                          |
| maker-9-augustus-gene-230.54-mRNA-1 | Japonica | NA       |              |              | OsR498G0917984100.01.T01 | Type I inositol polyphosphate 5-phosphatase                          |
| maker-9-augustus-gene-230.56-mRNA-1 | Japonica | NA       |              |              | OsR498G0917985900.01.T03 | GGACT domain-containing protein                                      |
| maker-9-augustus-gene-230.65-mRNA-1 | Japonica | NA       |              | Os09g0572400 | OsR498G0917981400.01.T03 | ABC transporter F family member 1                                    |
| maker-9-augustus-gene-230.69-mRNA-1 | Japonica | NA       |              |              | OsR498G0917983600.01.T04 | dynammin-related protein 1E                                          |
| maker-9-augustus-gene-230.75-mRNA-1 | Japonica | NA       |              | Os09g0573100 | OsR498G0917984400.01.T01 | SAYSvFN domain-containing protein (Fragment)                         |
| maker-9-augustus-gene-24.0-mRNA-1   | Japonica | NA       |              |              | OsR498G0916740800.01.T01 | 50S ribosomal protein L35 isoform 1                                  |
| maker-9-augustus-gene-24.5-mRNA-1   | Japonica | NA       |              | Os09g0128600 | OsR498G0916742000.01.T04 | CMP/dCMP deaminase                                                   |
| maker-9-augustus-gene-25.33-mRNA-1  | Japonica | NA       |              | Os09g0128700 | OsR498G0916742300.01.T01 |                                                                      |
| maker-9-augustus-gene-25.34-mRNA-1  | Japonica | NA       |              | Os03g0743650 | OsR498G0307030000.01.T01 |                                                                      |
| maker-9-augustus-gene-26.0-mRNA-1   | Japonica | NA       |              | Os09g0130800 | OsR498G0916748200.01.T02 | Helicase ATP-binding domain-containing protein                       |
| maker-9-augustus-gene-28.0-mRNA-1   | Japonica | NA       |              | Os09g0132200 |                          | GDLS esterase/lipase                                                 |
| maker-9-augustus-gene-28.11-mRNA-1  | Japonica | NA       |              | Os09g0133000 | OsR498G0916757600.01.T01 | SWIB domain-containing protein (Fragment)                            |
| maker-9-augustus-gene-28.13-mRNA-1  | Japonica | NA       |              | Os09g0133200 | OsR498G0916758200.01.T02 | Tropinone reductase-like 3                                           |
| maker-9-augustus-gene-28.2-mRNA-1   | Japonica | NA       |              | Os09g0132900 | OsR498G0916757300.01.T01 | GDLS motif lipase/hydrolase-like                                     |
| maker-9-augustus-gene-28.4-mRNA-1   | Japonica | Indica   |              | Os09g0133600 | OsR498G0916760900.01.T01 | Plastid-lipid-associated protein, chloroplastic                      |
| maker-9-augustus-gene-28.6-mRNA-1   | Japonica | NA       |              | Os09g0132600 | OsR498G0916756400.01.T01 | Multiple organellar RNA editing factor 8 chloroplastic/mitochondrial |
| maker-9-augustus-gene-29.31-mRNA-1  | Japonica | NA       |              | Os09g0133700 | OsR498G0916761500.01.T01 | GlcNAc kinase                                                        |
| maker-9-augustus-gene-29.37-mRNA-1  | Japonica | NA       |              | Os09g0134400 | OsR498G0916762900.01.T03 | PRA1 family protein H                                                |
| maker-9-augustus-gene-29.40-mRNA-1  | Japonica | NA       |              | Os09g0133800 | OsR498G0916761800.01.T02 | WPP domain-associated protein-like isoform X3                        |
| maker-9-augustus-gene-29.42-mRNA-1  | Japonica | NA       |              | Os09g0134500 | OsR498G0916763200.01.T02 | Histone-lysine N-methyltransferase TRX1                              |
| maker-9-augustus-gene-3.0-mRNA-1    | Japonica | NA       |              | Os09g0101100 | OsR498G0916642200.01.T02 | ENDO3c domain-containing protein                                     |
| maker-9-augustus-gene-3.5-mRNA-1    | Japonica | NA       |              | Os09g0101800 | OsR498G0916644200.01.T04 | FYR C-terminal domain-containing protein (Fragment)                  |
| maker-9-augustus-gene-30.0-mRNA-1   | Japonica | NA       |              | Os09g0135700 | OsR498G0916769500.01.T05 | probable tyrosine-protein phosphatase At1g05000                      |
| maker-9-augustus-gene-30.5-mRNA-1   | Japonica | Indica   |              | Os05g0340000 | OsR498G0916768000.01.T06 |                                                                      |

|                                    |          |          |           |              |                          |                                                                           |
|------------------------------------|----------|----------|-----------|--------------|--------------------------|---------------------------------------------------------------------------|
| maker-9-augustus-gene-33.27-mRNA-1 | Japonica | Indica   |           | Os09g0237600 | OsR498G0916776000.01.T05 | Serine/threonine protein kinase                                           |
| maker-9-augustus-gene-33.31-mRNA-1 | Japonica | NA       |           | Os01g0838725 | OsR498G1018411500.01.T01 |                                                                           |
| maker-9-augustus-gene-34.21-mRNA-1 | Japonica | NA       |           |              |                          | GATA-4/5/6 transcription factor (Fragment)                                |
| maker-9-augustus-gene-34.22-mRNA-1 | Japonica | NA       |           | Os09g0240200 | OsR498G0916781010.01.T01 | B box-type domain-containing protein                                      |
| maker-9-augustus-gene-35.12-mRNA-1 | Japonica | NA       |           | Os09g0241700 |                          | Ribosomal protein-like                                                    |
| maker-9-augustus-gene-35.14-mRNA-1 | Japonica | NA       |           | Os09g0242300 | OsR498G0916788900.01.T01 | Anaphase-promoting complex subunit cdc20                                  |
| maker-9-augustus-gene-35.3-mRNA-1  | Japonica | NA       |           |              |                          | STAS domain-containing protein                                            |
| maker-9-augustus-gene-35.7-mRNA-1  | Japonica | Indica   |           | Os09g0241100 | OsR498G0916784100.01.T01 | WD repeat and HMG-box DNA-binding protein like                            |
| maker-9-augustus-gene-38.0-mRNA-1  | Japonica | NA       |           |              | OsR498G0916801600.01.T05 | Putative 2-oxoglutarate-dependent dioxygenase DIN11                       |
| maker-9-augustus-gene-39.0-mRNA-1  | Japonica | NA       |           |              |                          | Glutamate--cysteine ligase                                                |
| maker-9-augustus-gene-39.3-mRNA-1  | Japonica | Japonica |           | Os09g0246200 | OsR498G0916804200.01.T01 | DNA-directed RNA polymerase                                               |
| maker-9-augustus-gene-39.9-mRNA-1  | Japonica | NA       |           | Os05g0128900 | OsR498G0816083200.01.T02 | Trehalose-phosphatase                                                     |
| maker-9-augustus-gene-4.0-mRNA-1   | Japonica | NA       |           | Os09g0103100 |                          | Triacylglycerol lipase 1                                                  |
| maker-9-augustus-gene-4.6-mRNA-1   | Japonica | NA       |           | Os09g0103200 | OsR498G0916646300.01.T02 |                                                                           |
| maker-9-augustus-gene-40.26-mRNA-1 | Japonica | NA       |           | Os09g0247600 | OsR498G0916815400.01.T01 | GDSL-motif lipase/hydrolase-like                                          |
| maker-9-augustus-gene-41.0-mRNA-1  | Japonica | Indica   |           | Os08g0339200 | OsR498G0916816700.01.T07 | D-aminoacyl-tRNA deacylase-like isoform X2                                |
| maker-9-augustus-gene-41.13-mRNA-1 | Japonica | NA       |           | Os09g0248200 | OsR498G0916818400.01.T03 |                                                                           |
| maker-9-augustus-gene-41.17-mRNA-1 | Japonica | NA       |           | Os09g0248300 | OsR498G0916818800.01.T01 |                                                                           |
| maker-9-augustus-gene-41.6-mRNA-1  | Japonica | NA       |           | Os09g0248100 | OsR498G0916818100.01.T01 | Fasciclin-like arabinogalactan protein 2                                  |
| maker-9-augustus-gene-42.0-mRNA-1  | Japonica | Japonica |           | Os09g0249900 | OsR498G0916826900.01.T02 | Ferredoxin-thioredoxin reductase catalytic chain, chloroplastic           |
| maker-9-augustus-gene-42.14-mRNA-1 | Japonica | NA       |           | Os09g0249000 | OsR498G0916823600.01.T01 | nitrile-specifier protein 5-like                                          |
| maker-9-augustus-gene-42.15-mRNA-1 | Japonica | Indica   |           | Os09g0249600 | OsR498G0916825600.01.T02 | Pre-mRNA-splicing factor 3                                                |
| maker-9-augustus-gene-42.19-mRNA-1 | Japonica | NA       |           | Os09g0249700 | OsR498G0916826000.01.T03 | Serine/threonine-protein phosphatase 2A regulatory subunit A beta isoform |
| maker-9-augustus-gene-42.5-mRNA-1  | Japonica | NA       |           | Os08g0459400 |                          | DDE Tnp4 domain-containing protein (Fragment)                             |
| maker-9-augustus-gene-42.9-mRNA-1  | Japonica | NA       |           | Os09g0248900 | OsR498G0916823200.01.T01 | Putative 2-oxoglutarate-dependent dioxygenase DIN11                       |
| maker-9-augustus-gene-43.0-mRNA-1  | Japonica | NA       |           | Os09g0250700 | OsR498G0916833700.01.T06 | protein ACTIVITY OF BC1 COMPLEX KINASE 7, chloroplastic                   |
| maker-9-augustus-gene-44.37-mRNA-1 | Japonica | NA       |           | Os09g0251800 | OsR498G0916837100.01.T01 | C2 domain-containing protein (Fragment)                                   |
| maker-9-augustus-gene-44.47-mRNA-1 | Japonica | NA       |           | Os09g0250800 | OsR498G0916834400.01.T01 | ABC transporter G family member                                           |
| maker-9-augustus-gene-45.11-mRNA-1 | Japonica | NA       |           |              |                          | HECT-type E3 ubiquitin transferase                                        |
| maker-9-augustus-gene-45.17-mRNA-1 | Japonica | NA       |           | Os09g0253000 | OsR498G0916841100.01.T01 | AvrRpt-cleavage domain-containing protein (Fragment)                      |
| maker-9-augustus-gene-45.5-mRNA-1  | Japonica | NA       |           | Os09g0252100 | OsR498G0916838900.01.T05 | Acetyl-CoA acetyltransferase, cytosolic 1                                 |
| maker-9-augustus-gene-46.37-mRNA-1 | Japonica | Japonica |           | Os09g0254600 | OsR498G0916851500.01.T01 | Protein RUPTURED POLLEN GRAIN 1                                           |
| maker-9-augustus-gene-47.40-mRNA-1 | Japonica | NA       |           | Os09g0255000 | OsR498G0916842100.01.T02 | Beta-fructofuranosidase, insoluble isoenzyme 7                            |
| maker-9-augustus-gene-47.47-mRNA-1 | Japonica | NA       |           | Os09g0255400 | OsR498G0916843600.01.T01 | Indole-3-glycerol-phosphate synthase                                      |
| maker-9-augustus-gene-49.11-mRNA-1 | Japonica | NA       |           | Os09g0258600 | OsR498G0916851000.01.T01 | Ribosomal protein L17                                                     |
| maker-9-augustus-gene-49.4-mRNA-1  | Japonica | NA       |           | Os09g0258000 | OsR498G0916849000.01.T03 | Phosphatidylinositolphosphatidylcholine transfer protein sfh2             |
| maker-9-augustus-gene-49.9-mRNA-1  | Japonica | NA       | Kinase    | Os09g0258500 | OsR498G0916850600.01.T01 | Serine/threonine-protein kinase D6PKL2                                    |
| maker-9-augustus-gene-5.0-mRNA-1   | Japonica | NA       |           | Os09g0103500 | OsR498G0916647100.01.T01 | Ribosomal large subunit pseudouridine synthase C                          |
| maker-9-augustus-gene-5.10-mRNA-1  | Japonica | NA       |           |              | OsR498G0916648900.01.T01 | FKBP-type peptidyl-prolyl cis-trans isomerase                             |
| maker-9-augustus-gene-5.13-mRNA-1  | Japonica | NA       |           | Os09g0104300 | OsR498G0916649300.01.T03 | PRKR-interacting protein 1                                                |
| maker-9-augustus-gene-5.15-mRNA-1  | Japonica | NA       |           | Os09g0103600 | OsR498G0916647400.01.T01 | Pre-mRNA-splicing factor 38                                               |
| maker-9-augustus-gene-5.18-mRNA-1  | Japonica | NA       |           |              | OsR498G0916649200.01.T03 | DNA repair protein RAD 4                                                  |
| maker-9-augustus-gene-5.4-mRNA-1   | Japonica | NA       |           | Os09g0103800 | OsR498G0916648300.01.T02 | Peptidylprolyl isomerase                                                  |
| maker-9-augustus-gene-50.47-mRNA-1 | Japonica | NA       |           | Os09g0258800 |                          | Bidirectional sugar transporter SWEET                                     |
| maker-9-augustus-gene-50.64-mRNA-1 | Japonica | NA       |           | Os09g0260300 |                          | Ribosomal protein-like                                                    |
| maker-9-augustus-gene-51.0-mRNA-1  | Japonica | NA       |           |              |                          |                                                                           |
| maker-9-augustus-gene-51.17-mRNA-1 | Japonica | NA       |           | Os09g0261300 | OsR498G0916858600.01.T01 | Phosphoglycolate phosphatase                                              |
| maker-9-augustus-gene-52.35-mRNA-1 | Japonica | NA       |           | Os05g0267732 | OsR498G0510213400.01.T01 |                                                                           |
| maker-9-augustus-gene-55.10-mRNA-1 | Japonica | NA       |           | Os09g0268300 | OsR498G0916879300.01.T01 | Hexose transporter                                                        |
| maker-9-augustus-gene-56.36-mRNA-1 | Japonica | NA       |           |              | OsR498G0916882000.01.T02 | WRKY domain-containing protein                                            |
| maker-9-augustus-gene-57.0-mRNA-1  | Japonica | NA       | CC-NBS-TM | Os09g0270700 | OsR498G0916882900.01.T01 | Disease resistance protein RPM1                                           |
| maker-9-augustus-gene-58.34-mRNA-1 | Japonica | NA       |           | Os09g0272300 | OsR498G0916887300.01.T02 | (1->3)-beta-glucan endohydrolase                                          |
| maker-9-augustus-gene-58.36-mRNA-1 | Japonica | Japonica |           | Os09g0272000 | OsR498G0916886400.01.T03 | Heavy metal-associated isoprenylated plant protein 16                     |
| maker-9-augustus-gene-58.38-mRNA-1 | Japonica | NA       |           | Os09g0272250 | OsR498G0916887200.01.T01 |                                                                           |
| maker-9-augustus-gene-58.40-mRNA-1 | Japonica | NA       |           |              | OsR498G0916887600.01.T01 |                                                                           |
| maker-9-augustus-gene-58.42-mRNA-1 | Japonica | Japonica |           | Os09g0272500 | OsR498G0916888000.01.T02 | Vesicle transport protein, Use                                            |
| maker-9-augustus-gene-59.39-mRNA-1 | Japonica | NA       |           | Os09g0272600 | OsR498G0916888300.01.T01 |                                                                           |
| maker-9-augustus-gene-6.0-mRNA-1   | Japonica | NA       |           |              |                          | FAR1 domain-containing protein                                            |
| maker-9-augustus-gene-60.28-mRNA-1 | Japonica | NA       |           | Os09g0274900 |                          | CYSTM domain-containing protein                                           |
| maker-9-augustus-gene-60.30-mRNA-1 | Japonica | Japonica |           | Os09g0275300 | OsR498G0916887200.01.T01 |                                                                           |
| maker-9-augustus-gene-60.32-mRNA-1 | Japonica | NA       |           | Os09g0275400 | OsR498G0916897000.01.T01 | Prennapirodiene oxygenase                                                 |



|                                    |          |          |           |              |                          |                                                                            |
|------------------------------------|----------|----------|-----------|--------------|--------------------------|----------------------------------------------------------------------------|
| maker-9-augustus-gene-61.0-mRNA-1  | Japonica | NA       |           |              |                          | VWA domain-containing protein                                              |
| maker-9-augustus-gene-62.32-mRNA-1 | Japonica | NA       |           | Os09g0277800 | OsR498G0916899900.01.T05 | Enoyl-ACP reductase                                                        |
| maker-9-augustus-gene-62.38-mRNA-1 | Japonica | NA       |           | Os09g0278300 | OsR498G0916901800.01.T02 | 1-phosphatidylinositol-3-phosphate 5-kinase                                |
| maker-9-augustus-gene-62.39-mRNA-1 | Japonica | NA       |           |              |                          | 1-phosphatidylinositol-3-phosphate 5-kinase                                |
| maker-9-augustus-gene-62.46-mRNA-1 | Japonica | NA       |           | Os09g0279000 | OsR498G0916903600.01.T02 | ENT domain-containing protein                                              |
| maker-9-augustus-gene-62.50-mRNA-1 | Japonica | NA       | CC-Kinase |              | OsR498G0916904200.01.T03 | Serine/threonine protein kinase                                            |
| maker-9-augustus-gene-63.0-mRNA-1  | Japonica | Indica   |           | Os09g0279400 | OsR498G0916906700.01.T01 | Rhodanese-like domain-containing protein 9, chloroplastic                  |
| maker-9-augustus-gene-63.10-mRNA-1 | Japonica | NA       |           | Os09g0280300 | OsR498G0916908100.01.T01 | glucose--fructose oxidoreductase-like isoform X2                           |
| maker-9-augustus-gene-63.15-mRNA-1 | Japonica | NA       |           | Os09g0280500 | OsR498G0916909900.01.T02 | DOG1 domain-containing protein                                             |
| maker-9-augustus-gene-63.19-mRNA-1 | Japonica | NA       |           | Os09g0279500 | OsR498G0916907000.01.T01 | Plastid-specific 30S ribosomal protein 2                                   |
| maker-9-augustus-gene-63.2-mRNA-1  | Japonica | NA       |           | Os09g0279600 | OsR498G0916907100.01.T05 | DNA topoisomerase VI, B subunit                                            |
| maker-9-augustus-gene-63.22-mRNA-1 | Japonica | NA       |           | Os09g0280600 | OsR498G0916910400.01.T01 | Meiotic nuclear division protein 1 homolog                                 |
| maker-9-augustus-gene-64.28-mRNA-1 | Japonica | Indica   |           | Os09g0281600 | OsR498G0916915500.01.T05 | SURP and G-patch domain-containing protein                                 |
| maker-9-augustus-gene-64.33-mRNA-1 | Japonica | Indica   |           | Os10g0377400 | OsR498G0916915900.01.T01 | Ras-related protein RGP1                                                   |
| maker-9-augustus-gene-64.35-mRNA-1 | Japonica | NA       |           | Os09g0281800 | OsR498G0916917100.01.T01 | Cobyrlic acid synthase (Fragment)                                          |
| maker-9-augustus-gene-64.37-mRNA-1 | Japonica | NA       |           | Os09g0281300 | OsR498G0916914400.01.T02 | Fiber protein Fb34                                                         |
| maker-9-augustus-gene-64.39-mRNA-1 | Japonica | NA       |           | Os09g0281900 | OsR498G0916917400.01.T01 | Mediator of RNA polymerase II transcription subunit 14                     |
| maker-9-augustus-gene-66.39-mRNA-1 | Japonica | NA       |           |              |                          |                                                                            |
| maker-9-augustus-gene-66.41-mRNA-1 | Japonica | NA       |           | Os09g0283600 | OsR498G0916926100.01.T01 | Putative E3 ubiquitin-protein ligase ARI9                                  |
| maker-9-augustus-gene-66.43-mRNA-1 | Japonica | NA       |           | Os09g0284200 | OsR498G0916928500.01.T03 | Serine/threonine-protein phosphatase                                       |
| maker-9-augustus-gene-66.45-mRNA-1 | Japonica | NA       |           | Os09g0284300 | OsR498G0916928900.01.T01 |                                                                            |
| maker-9-augustus-gene-66.47-mRNA-1 | Japonica | NA       |           |              | OsR498G0916929500.01.T01 |                                                                            |
| maker-9-augustus-gene-66.49-mRNA-1 | Japonica | NA       |           | Os09g0284400 | OsR498G0916929200.01.T01 | GrpE protein homolog                                                       |
| maker-9-augustus-gene-66.51-mRNA-1 | Japonica | Indica   |           | Os08g0338900 | OsR498G0916929800.01.T01 | Enhancer of polycomb-like protein                                          |
| maker-9-augustus-gene-74.27-mRNA-1 | Japonica | NA       |           | Os09g0293400 | OsR498G0917001700.01.T02 | Ubiquitin-conjugating enzyme                                               |
| maker-9-augustus-gene-75.0-mRNA-1  | Japonica | NA       |           | Os09g0293900 | OsR498G0917003300.01.T01 | Peptidylprolyl isomerase                                                   |
| maker-9-augustus-gene-75.14-mRNA-1 | Japonica | NA       |           | Os09g0294300 | OsR498G0917004800.01.T02 | Putative ubiquitin-conjugating enzyme E2 26                                |
| maker-9-augustus-gene-75.4-mRNA-1  | Japonica | NA       |           |              | OsR498G0917006100.01.T01 | Ankyrin repeat protein family-like                                         |
| maker-9-augustus-gene-75.6-mRNA-1  | Japonica | NA       |           | Os12g0468900 | OsR498G0510503700.01.T01 | Cell wall protein-like                                                     |
| maker-9-augustus-gene-75.9-mRNA-1  | Japonica | NA       |           | Os09g0294000 | OsR498G0917003600.01.T01 | Aspartokinase                                                              |
| maker-9-augustus-gene-76.15-mRNA-1 | Japonica | NA       |           |              | OsR498G0917010500.01.T03 | Embryo defective 1381                                                      |
| maker-9-augustus-gene-76.21-mRNA-1 | Japonica | NA       |           |              | OsR498G0917007400.01.T01 | Ankyrin repeat family protein-like                                         |
| maker-9-augustus-gene-76.25-mRNA-1 | Japonica | NA       |           |              | OsR498G0917008800.01.T02 | Ankyrin repeat family protein-like                                         |
| maker-9-augustus-gene-77.41-mRNA-1 | Japonica | NA       |           | Os09g0296800 | OsR498G0917011700.01.T02 | Chlorophyll a-b binding protein, chloroplastic                             |
| maker-9-augustus-gene-77.44-mRNA-1 | Japonica | NA       |           | Os09g0296900 | OsR498G0917011900.01.T01 | Putative transducin family protein / WD-40 repeat family protein-like      |
| maker-9-augustus-gene-77.48-mRNA-1 | Japonica | NA       |           | Os09g0297000 | OsR498G0917012300.01.T06 | Ferrochelatase-2, chloroplastic                                            |
| maker-9-augustus-gene-77.53-mRNA-1 | Japonica | Indica   |           | Os08g0345700 | OsR498G0917014900.01.T04 | Pyrophosphate--fructose 6-phosphate 1-phosphotransferase subunit alpha     |
| maker-9-augustus-gene-77.57-mRNA-1 | Japonica | NA       |           | Os09g0298400 | OsR498G0917016700.01.T01 | THO complex subunit like                                                   |
| maker-9-augustus-gene-77.63-mRNA-1 | Japonica | NA       |           | Os09g0297100 | OsR498G0917012600.01.T01 | Ubiquitin-conjugating enzyme                                               |
| maker-9-augustus-gene-77.66-mRNA-1 | Japonica | NA       |           | Os09g0297400 | OsR498G0917013200.01.T02 | Phosphoenolpyruvate/phosphate translocator like                            |
| maker-9-augustus-gene-77.71-mRNA-1 | Japonica | NA       |           | Os09g0297800 | OsR498G0917014000.01.T01 | GPI-anchored protein LORELEI                                               |
| maker-9-augustus-gene-77.73-mRNA-1 | Japonica | NA       |           | Os09g0298200 | OsR498G0917015400.01.T02 | Glucose-1-phosphate adenylyltransferase small subunit, chloroplastic/amylo |
| maker-9-augustus-gene-78.26-mRNA-1 | Japonica | Indica   |           | Os08g0346400 | OsR498G0917018900.01.T02 | HTH myb-type domain-containing protein                                     |
| maker-9-augustus-gene-78.30-mRNA-1 | Japonica | NA       |           | Os09g0299200 | OsR498G0917019700.01.T04 | HTH myb-type domain-containing protein                                     |
| maker-9-augustus-gene-78.32-mRNA-1 | Japonica | NA       |           | Os09g0298500 | OsR498G0917017000.01.T01 | E3 ubiquitin-protein ligase WAV3 isoform B                                 |
| maker-9-augustus-gene-78.34-mRNA-1 | Japonica | NA       |           | Os09g0298700 | OsR498G0917018000.01.T02 | Flowering time control protein FPA                                         |
| maker-9-augustus-gene-78.36-mRNA-1 | Japonica | Indica   |           | Os09g0299400 | OsR498G0917020200.01.T01 | Two-pore potassium channel like                                            |
| maker-9-augustus-gene-78.39-mRNA-1 | Japonica | Indica   |           | Os07g0296200 | OsR498G0917021600.01.T03 | Transcription initiation factor TFIID subunit 15                           |
| maker-9-augustus-gene-79.0-mRNA-1  | Japonica | NA       |           |              |                          | Transposon protein, putative, CACTA, En/Spm sub-class                      |
| maker-9-augustus-gene-8.26-mRNA-1  | Japonica | NA       |           | Os09g0108400 | OsR498G0916666100.01.T02 | armadillo repeat-containing kinesin-like protein 1                         |
| maker-9-augustus-gene-8.29-mRNA-1  | Japonica | Japonica |           | Os09g0108600 | OsR498G1018169000.01.T01 | Aldose 1-epimerase                                                         |
| maker-9-augustus-gene-80.32-mRNA-1 | Japonica | NA       |           |              | OsR498G0917028100.01.T01 |                                                                            |
| maker-9-augustus-gene-82.25-mRNA-1 | Japonica | Indica   |           | Os09g0304400 | OsR498G0917038800.01.T01 |                                                                            |
| maker-9-augustus-gene-83.31-mRNA-1 | Japonica | NA       |           | Os09g0306400 | OsR498G0917044700.01.T01 | BZIP transcription factor                                                  |
| maker-9-augustus-gene-84.26-mRNA-1 | Japonica | NA       |           | Os09g0306800 | OsR498G0917046800.01.T01 | Polycomb group protein EMBRYONIC FLOWER 2                                  |
| maker-9-augustus-gene-87.0-mRNA-1  | Japonica | NA       | NBS-TM    |              |                          | NB-ARC domain-containing protein                                           |
| maker-9-augustus-gene-9.0-mRNA-1   | Japonica | Indica   |           | Os09g0109600 | OsR498G0916670300.01.T01 |                                                                            |
| maker-9-augustus-gene-9.10-mRNA-1  | Japonica | NA       |           | Os09g0109500 | OsR498G0916670000.01.T05 | UNC-50 family protein isoform 1                                            |
| maker-9-augustus-gene-9.16-mRNA-1  | Japonica | NA       |           | Os09g0110200 | OsR498G0916673800.01.T01 | Pentatricopeptide repeat                                                   |
| maker-9-augustus-gene-9.18-mRNA-1  | Japonica | NA       |           | Os09g0110300 | OsR498G0916674400.01.T01 | Cyclase family protein isoform 1                                           |
| maker-9-augustus-gene-9.2-mRNA-1   | Japonica | NA       |           |              |                          |                                                                            |

|                                          |          |          |               |              |                          |                                                                            |
|------------------------------------------|----------|----------|---------------|--------------|--------------------------|----------------------------------------------------------------------------|
| maker-9-augustus-gene-9.8-mRNA-1         | Japonica | NA       | Kinase-LRR-TM | Os09g0110100 | OsR498G0916673100.01.T01 | LRR-RLK                                                                    |
| maker-9-augustus-gene-92.2-mRNA-1        | Japonica | Indica   |               | Os02g0571100 | OsR498G0917128900.01.T01 | Ent-neo-cis-trans-clerodienyl diphosphate synthase                         |
| maker-9-augustus-gene-92.3-mRNA-1        | Japonica | NA       |               |              |                          | Syn-copalyl diphosphate synthase                                           |
| maker-9-augustus-gene-93.0-mRNA-1        | Japonica | Indica   |               | Os08g0369000 | OsR498G0917137100.01.T01 | Nucleobase-ascorbate transporter 2                                         |
| maker-9-augustus-gene-93.5-mRNA-1        | Japonica | NA       |               | Os09g0321200 | OsR498G0917140600.01.T01 | Carotenoid cleavage dioxygenase                                            |
| maker-9-augustus-gene-94.22-mRNA-1       | Japonica | NA       |               | Os09g0321900 | OsR498G0917147300.01.T02 | UBC core domain-containing protein (Fragment)                              |
| maker-9-augustus-gene-94.24-mRNA-1       | Japonica | NA       |               | Os08g0381000 |                          | Cell wall protein-like                                                     |
| maker-9-augustus-gene-94.27-mRNA-1       | Japonica | Indica   |               | Os09g0322000 | OsR498G0917148400.01.T02 | Sugar transporter                                                          |
| maker-9-augustus-gene-95.0-mRNA-1        | Japonica | Japonica | CC-LRR-NBS-TM | Os09g0322800 | OsR498G0917149700.01.T01 | NBS-LRR disease resistance protein NBS39                                   |
| maker-9-augustus-gene-95.15-mRNA-1       | Japonica | NA       |               | Os09g0323000 | OsR498G0917151200.01.T05 | UDP-glucose 4-epimerase 2                                                  |
| maker-9-augustus-gene-95.4-mRNA-1        | Japonica | Japonica |               | Os09g0322900 | OsR498G0917150300.01.T01 | Bifunctional phosphatase IMPL2, chloroplastic                              |
| maker-9-augustus-gene-95.6-mRNA-1        | Japonica | NA       |               |              | OsR498G0917149200.01.T02 | Nudix hydrolase                                                            |
| maker-9-augustus-gene-96.59-mRNA-1       | Japonica | NA       |               | Os09g0323700 | OsR498G0917153500.01.T01 | Peroxidase                                                                 |
| maker-9-augustus-gene-96.61-mRNA-1       | Japonica | Indica   |               | Os09g0325220 | OsR498G0917156900.01.T02 | FBD domain-containing protein                                              |
| maker-9-augustus-gene-96.67-mRNA-1       | Japonica | NA       |               | Os09g0323500 | OsR498G0917152800.01.T01 | Ser/Thr-rich protein T10 in DGCR region                                    |
| maker-9-augustus-gene-96.72-mRNA-1       | Japonica | NA       |               | Os09g0323900 | OsR498G0917154200.01.T01 | Peroxidase                                                                 |
| maker-9-augustus-gene-96.74-mRNA-1       | Japonica | Japonica | Kinase-TM     | Os09g0325140 | OsR498G0917156400.01.T04 | LysM domain receptor-like kinase 10                                        |
| maker-9-augustus-gene-97.48-mRNA-1       | Japonica | NA       | Kinase-LRR-TM | Os09g0326100 | OsR498G0917161200.01.T01 | Receptor-like protein kinase HSL1                                          |
| maker-9-augustus-gene-98.25-mRNA-1       | Japonica | NA       |               | Os09g0327000 | OsR498G0917161900.01.T01 | High osmolarity signaling protein sho1                                     |
| maker-9-augustus-gene-98.28-mRNA-1       | Japonica | NA       |               | Os09g0327300 | OsR498G0917162500.01.T01 | Methenyltetrahydrofolate cyclohydrolase                                    |
| maker-9-augustus-gene-98.33-mRNA-1       | Japonica | NA       |               | Os09g0327100 | OsR498G0917162200.01.T01 | Putative small GTPase superfamily, P-loop containing nucleoside triphospha |
| maker-9-augustus-gene-98.35-mRNA-1       | Japonica | NA       |               | Os09g0327200 | OsR498G0917162400.01.T02 | Pentatricopeptide repeat                                                   |
| maker-9-augustus-gene-98.39-mRNA-1       | Japonica | NA       |               | Os09g0327400 | OsR498G0917162800.01.T03 | Glucose-6-phosphate 1-epimerase                                            |
| maker-9-augustus-gene-98.43-mRNA-1       | Japonica | NA       |               |              | OsR498G0917163400.01.T02 | START-like domain containing protein                                       |
| maker-9-augustus-gene-99.2-mRNA-1        | Japonica | NA       |               | Os01g0382900 |                          |                                                                            |
| maker-AC155918-augustus-gene-1.53-mRNA-1 | Japonica | NA       |               | 0            | OsR498G1119923200.01.T01 | Urea amidohydrolase                                                        |
| maker-AC155918-augustus-gene-1.59-mRNA-1 | Japonica | NA       |               |              |                          | SET domain-containing protein                                              |
| augustus-1-processed-gene-105.7-mRNA-1   | NA       | NA       |               | 0            | OsR498G0100702900.01.T01 | MADS-box domain-containing protein                                         |
| augustus-1-processed-gene-114.34-mRNA-1  | NA       | NA       |               |              |                          | Transposable element protein, putative, MuDR                               |
| augustus-1-processed-gene-115.16-mRNA-1  | NA       | NA       |               | Os01g0306400 | OsR498G0100760300.01.T01 | DOG1 domain-containing protein (Fragment)                                  |
| augustus-1-processed-gene-12.15-mRNA-1   | NA       | Japonica |               | Os01g0122300 | OsR498G0100074300.01.T01 | RING-type E3 ubiquitin transferase                                         |
| augustus-1-processed-gene-12.16-mRNA-1   | NA       | NA       |               | 0            | OsR498G0100074500.01.T01 | PE domain-containing protein                                               |
| augustus-1-processed-gene-126.38-mRNA-1  | NA       | NA       |               |              |                          |                                                                            |
| augustus-1-processed-gene-144.32-mRNA-1  | NA       | Japonica |               | Os01g0355100 | OsR498G0100918100.01.T01 | Jacalin-type lectin domain-containing protein                              |
| augustus-1-processed-gene-144.33-mRNA-1  | NA       | NA       |               | Os01g0355400 |                          | MATH domain-containing protein                                             |
| augustus-1-processed-gene-150.10-mRNA-1  | NA       | NA       |               | 0            | OsR498G0408300400.01.T01 | Hydroxyproline-rich glycoprotein-like                                      |
| augustus-1-processed-gene-151.26-mRNA-1  | NA       | NA       | Kinase-TM     | Os01g0366300 |                          | Cysteine-rich receptor-like protein kinase 10                              |
| augustus-1-processed-gene-155.23-mRNA-1  | NA       | NA       |               | 0            | OsR498G0917374600.01.T01 |                                                                            |
| augustus-1-processed-gene-159.16-mRNA-1  | NA       | NA       |               | Os03g0412050 |                          | Transposon protein, putative, Mutator sub-class, expressed                 |
| augustus-1-processed-gene-191.14-mRNA-1  | NA       | NA       |               | Os01g0518400 |                          | Zinc finger BED domain-containing protein DAYSLEEPER                       |
| augustus-1-processed-gene-191.22-mRNA-1  | NA       | Japonica |               | Os01g0518800 | OsR498G0102362500.01.T01 |                                                                            |
| augustus-1-processed-gene-191.30-mRNA-1  | NA       | NA       |               | Os01g0742300 | OsR498G0101973200.01.T01 | Putative 3-hydroxyisobutyrate dehydrogenase-like 1 mitochondrial           |
| augustus-1-processed-gene-20.29-mRNA-1   | NA       | NA       |               | Os01g0137100 | OsR498G0100127300.01.T02 | WAK2-OsWAK receptor-like cytoplasmic kinase (OsWAK-RLCK)                   |
| augustus-1-processed-gene-201.15-mRNA-1  | NA       | NA       |               | 0            | OsR498G0101178300.01.T01 |                                                                            |
| augustus-1-processed-gene-204.0-mRNA-1   | NA       | Indica   |               | Os01g0539900 | OsR498G0101198100.01.T05 |                                                                            |
| augustus-1-processed-gene-208.18-mRNA-1  | NA       | Japonica |               | Os01g0543600 | OsR498G0101243900.01.T04 | Indole-2-monooxygenase                                                     |
| augustus-1-processed-gene-208.32-mRNA-1  | NA       | NA       |               |              |                          | Transposable element protein, putative, MuDR                               |
| augustus-1-processed-gene-21.48-mRNA-1   | NA       | NA       |               | Os01g0139600 | OsR498G0100138300.01.T01 | Lipid phosphate phosphatase                                                |
| augustus-1-processed-gene-21.50-mRNA-1   | NA       | Japonica |               | Os01g0140100 | OsR498G0101471900.01.T01 | Aspartic proteinase nepenthesin-1                                          |
| augustus-1-processed-gene-210.24-mRNA-1  | NA       | NA       |               | 0            | OsR498G0101252500.01.T01 |                                                                            |
| augustus-1-processed-gene-210.27-mRNA-1  | NA       | Japonica |               | Os01g0545900 | OsR498G0101254300.01.T01 | Selenium-binding protein-like                                              |
| augustus-1-processed-gene-210.29-mRNA-1  | NA       | NA       |               | 0            | OsR498G0305683000.01.T01 | Glycine-rich protein 2b                                                    |
| augustus-1-processed-gene-210.40-mRNA-1  | NA       | NA       |               | 0            | OsR498G0101257300.01.T01 | Pentatricopeptide repeat-containing protein                                |
| augustus-1-processed-gene-210.41-mRNA-1  | NA       | NA       |               | 0            | OsR498G0101258700.01.T05 | JmjC domain-containing protein 4                                           |
| augustus-1-processed-gene-213.2-mRNA-1   | NA       | NA       |               | Os01g0550200 | OsR498G0101280300.01.T01 | F-box protein SKIP8 isoform A                                              |
| augustus-1-processed-gene-215.21-mRNA-1  | NA       | NA       |               | Os01g0553400 | OsR498G0101299100.01.T04 | FBD domain-containing protein                                              |
| augustus-1-processed-gene-215.22-mRNA-1  | NA       | Indica   |               | Os05g0471800 | OsR498G0101301100.01.T01 | FAR1 domain-containing protein                                             |
| augustus-1-processed-gene-216.22-mRNA-1  | NA       | NA       |               | Os01g0555100 | OsR498G0101311500.01.T03 | E3 SUMO-protein ligase RanBP2                                              |
| augustus-1-processed-gene-216.24-mRNA-1  | NA       | NA       |               | Os01g0555400 |                          |                                                                            |
| augustus-1-processed-gene-217.18-mRNA-1  | NA       | NA       |               | Os01g0556700 | OsR498G0101321300.01.T01 | Nitrate/chlorate transporter                                               |
| augustus-1-processed-gene-217.21-mRNA-1  | NA       | NA       |               | Os01g0557400 | OsR498G0101324300.01.T01 | F-box domain-containing protein (Fragment)                                 |

|                                         |    |          |        |              |                          |                                                                     |
|-----------------------------------------|----|----------|--------|--------------|--------------------------|---------------------------------------------------------------------|
| augustus-1-processed-gene-217.9-mRNA-1  | NA | NA       |        | Os01g0556400 | OsR498G0101315500.01.T03 | Chaperone protein dnaJ 49                                           |
| augustus-1-processed-gene-218.10-mRNA-1 | NA | NA       |        | Os01g0558500 | OsR498G0101332700.01.T02 | PWWP domain-containing protein                                      |
| augustus-1-processed-gene-218.9-mRNA-1  | NA | NA       |        | Os01g0558200 | OsR498G0101330900.01.T01 | Amino acid dehydrogenase family protein                             |
| augustus-1-processed-gene-22.10-mRNA-1  | NA | NA       |        | Os01g0141000 | OsR498G0100148300.01.T03 | AP2/ERF and B3 domain-containing transcription repressor TEM1       |
| augustus-1-processed-gene-22.11-mRNA-1  | NA | NA       |        | 0            | OsR498G0100149300.01.T01 |                                                                     |
| augustus-1-processed-gene-22.9-mRNA-1   | NA | Indica   |        | Os01g0141000 | OsR498G0100143300.01.T01 | AP2/ERF and B3 domain-containing transcription repressor TEM1       |
| augustus-1-processed-gene-23.61-mRNA-1  | NA | Indica   |        | Os02g0547100 | OsR498G0101158000.01.T01 | Transposon protein, putative, Mutator sub-class, expressed          |
| augustus-1-processed-gene-233.12-mRNA-1 | NA | NA       |        |              |                          | Translation initiation factor                                       |
| augustus-1-processed-gene-233.25-mRNA-1 | NA | NA       |        |              |                          | Zinc ion binding                                                    |
| augustus-1-processed-gene-238.17-mRNA-1 | NA | NA       |        | Os02g0547100 |                          | Transposon protein, putative, Mutator sub-class, expressed          |
| augustus-1-processed-gene-24.23-mRNA-1  | NA | Japonica |        | Os01g0145000 | OsR498G0100167700.01.T01 |                                                                     |
| augustus-1-processed-gene-24.46-mRNA-1  | NA | NA       |        | 0            | OsR498G0100163600.01.T01 | Actin-related protein 5 isoform X1                                  |
| augustus-1-processed-gene-240.28-mRNA-1 | NA | Indica   | LRR-TM | Os01g0594300 | OsR498G0101457300.01.T01 | Leucine-rich repeat extensin-like protein 3                         |
| augustus-1-processed-gene-241.17-mRNA-1 | NA | NA       |        | Os01g0597800 | OsR498G0101469300.01.T01 | Glycosyltransferase                                                 |
| augustus-1-processed-gene-241.2-mRNA-1  | NA | NA       |        |              |                          | FBD domain-containing protein                                       |
| augustus-1-processed-gene-242.30-mRNA-1 | NA | NA       |        | Os01g0598600 | OsR498G0101471900.01.T01 | Peptidase A1 domain-containing protein (Fragment)                   |
| augustus-1-processed-gene-242.56-mRNA-1 | NA | NA       |        | Os01g0598400 | OsR498G0101471400.01.T01 | FBD domain-containing protein (Fragment)                            |
| augustus-1-processed-gene-243.13-mRNA-1 | NA | Japonica |        | Os01g0601000 | OsR498G0101477000.01.T01 | Putative magnesium transporter CorA-like family protein-like        |
| augustus-1-processed-gene-243.2-mRNA-1  | NA | NA       |        | Os01g0600900 | OsR498G0101476300.01.T01 | Chlorophyll a-b binding protein, chloroplastic                      |
| augustus-1-processed-gene-244.17-mRNA-1 | NA | NA       | NBS-TM | 0            | OsR498G0101487100.01.T01 | Disease resistance protein RPP13                                    |
| augustus-1-processed-gene-245.1-mRNA-1  | NA | Indica   |        | Os01g0604300 | OsR498G0101493300.01.T01 | F-box domain-containing protein (Fragment)                          |
| augustus-1-processed-gene-245.23-mRNA-1 | NA | NA       |        | 0            | OsR498G0101498300.01.T01 | C3HC-type domain-containing protein (Fragment)                      |
| augustus-1-processed-gene-245.4-mRNA-1  | NA | NA       |        | Os01g0604600 |                          |                                                                     |
| augustus-1-processed-gene-246.1-mRNA-1  | NA | NA       |        | Os01g0607000 | OsR498G0101502500.01.T01 | Zinc finger domain-containing CCHC-type                             |
| augustus-1-processed-gene-246.15-mRNA-1 | NA | NA       |        | Os01g0607300 | OsR498G0101503900.01.T02 | Ubiquitin-like domain-containing protein                            |
| augustus-1-processed-gene-246.4-mRNA-1  | NA | NA       |        | 0            | OsR498G0101503100.01.T01 |                                                                     |
| augustus-1-processed-gene-248.70-mRNA-1 | NA | Indica   |        | Os01g0610800 | OsR498G0101521400.01.T01 | Papilin-like protein isoform X1                                     |
| augustus-1-processed-gene-252.0-mRNA-1  | NA | NA       |        | Os01g0616800 | OsR498G0101547500.01.T01 | FAD-binding PCMH-type domain-containing protein                     |
| augustus-1-processed-gene-254.30-mRNA-1 | NA | NA       |        | Os01g0620800 | OsR498G0101560500.01.T01 | Glycosyltransferase                                                 |
| augustus-1-processed-gene-254.31-mRNA-1 | NA | NA       |        | 0            | OsR498G0101560700.01.T01 |                                                                     |
| augustus-1-processed-gene-255.1-mRNA-1  | NA | NA       |        | Os01g0621900 | OsR498G0101564900.01.T01 | Cell wall protein AWA1-like                                         |
| augustus-1-processed-gene-256.23-mRNA-1 | NA | NA       |        | 0            | OsR498G0713388900.01.T02 |                                                                     |
| augustus-1-processed-gene-256.45-mRNA-1 | NA | NA       |        | Os01g0624700 | OsR498G0101574800.01.T01 | DNA-binding WRKY                                                    |
| augustus-1-processed-gene-258.30-mRNA-1 | NA | Indica   |        | Os04g0594800 | OsR498G0101589100.01.T01 | Oligopeptide transporter                                            |
| augustus-1-processed-gene-260.34-mRNA-1 | NA | NA       |        | Os01g0633200 | OsR498G0101598900.01.T01 | Factor of DNA methylation 1                                         |
| augustus-1-processed-gene-265.0-mRNA-1  | NA | NA       |        | Os01g0641800 | OsR498G0101626900.01.T01 | Adenosinetriphosphatase                                             |
| augustus-1-processed-gene-265.1-mRNA-1  | NA | NA       |        | Os01g0641800 | OsR498G0101626900.01.T01 | Adenosinetriphosphatase                                             |
| augustus-1-processed-gene-273.66-mRNA-1 | NA | NA       |        |              |                          | Eukaryotic translation initiation factor 3 subunit 10               |
| augustus-1-processed-gene-28.49-mRNA-1  | NA | NA       |        | Os01g0151900 | OsR498G0100184700.01.T01 | Pentatricopeptide repeat                                            |
| augustus-1-processed-gene-29.2-mRNA-1   | NA | Japonica | LRR-TM | Os01g0153000 | OsR498G0100190500.01.T02 | Serine/threonine kinase                                             |
| augustus-1-processed-gene-29.20-mRNA-1  | NA | NA       |        | Os01g0153800 | OsR498G0100193100.01.T01 | Putative carboxylesterase 15                                        |
| augustus-1-processed-gene-29.4-mRNA-1   | NA | Indica   |        | Os04g0625700 | OsR498G0100191300.01.T01 |                                                                     |
| augustus-1-processed-gene-300.54-mRNA-1 | NA | NA       |        | Os07g0513300 |                          | Transposon protein, putative, Mutator sub-class, expressed          |
| augustus-1-processed-gene-304.29-mRNA-1 | NA | NA       |        | Os01g0714600 |                          |                                                                     |
| augustus-1-processed-gene-338.31-mRNA-1 | NA | NA       |        | Os01g0781000 | OsR498G0102101700.01.T01 | Vacuolar protein sorting-associated protein 28 homolog              |
| augustus-1-processed-gene-342.8-mRNA-1  | NA | NA       |        | 0            | OsR498G0407856300.01.T01 | Zinc knuckle containing protein-like                                |
| augustus-1-processed-gene-343.21-mRNA-1 | NA | Japonica |        | Os01g0794800 | OsR498G0102133700.01.T02 | Subtilisin-like protease                                            |
| augustus-1-processed-gene-350.21-mRNA-1 | NA | NA       |        |              |                          | Transposon protein, putative, Mutator sub-class                     |
| augustus-1-processed-gene-351.56-mRNA-1 | NA | NA       |        | 0            | OsR498G0409198000.01.T01 | Glutaredoxin domain-containing protein                              |
| augustus-1-processed-gene-351.60-mRNA-1 | NA | NA       |        | 0            | OsR498G0204046800.01.T01 | Circumsporozoite protein-like                                       |
| augustus-1-processed-gene-357.42-mRNA-1 | NA | NA       |        | Os01g0819800 |                          | Putative pentatricopeptide repeat-containing protein, mitochondrial |
| augustus-1-processed-gene-368.30-mRNA-1 | NA | NA       |        | Os01g0658300 |                          | Glutaminyl-tRNA synthetase                                          |
| augustus-1-processed-gene-369.38-mRNA-1 | NA | NA       |        | Os01g0841700 | OsR498G0102309900.01.T01 | Elicitor-responsive protein 1                                       |
| augustus-1-processed-gene-369.50-mRNA-1 | NA | NA       |        | Os01g0842200 | OsR498G0102311900.01.T03 | Transcription factor GRAS                                           |
| augustus-1-processed-gene-37.62-mRNA-1  | NA | Japonica |        | Os01g0171200 | OsR498G0100239400.01.T02 |                                                                     |
| augustus-1-processed-gene-370.21-mRNA-1 | NA | Indica   |        | Os01g0844900 | OsR498G0102321300.01.T01 | Transcription factor LUX                                            |
| augustus-1-processed-gene-371.56-mRNA-1 | NA | NA       |        | Os01g0846400 |                          |                                                                     |
| augustus-1-processed-gene-371.68-mRNA-1 | NA | Indica   |        | Os01g0630700 | OsR498G0916643600.01.T01 | ATP-dependent DNA helicase                                          |
| augustus-1-processed-gene-371.75-mRNA-1 | NA | NA       |        |              |                          | Ultraviolet-B receptor UVR8                                         |
| augustus-1-processed-gene-373.34-mRNA-1 | NA | Indica   |        | Os03g0110200 | OsR498G0102000100.01.T01 | Transposon protein, putative, Mutator sub-class, expressed          |
| augustus-1-processed-gene-374.1-mRNA-1  | NA | NA       |        | Os01g0851600 | OsR498G0102344100.01.T01 | 3-oxo-5-alpha-steroid 4-dehydrogenase                               |

|                                         |    |          |               |              |                          |                                                            |
|-----------------------------------------|----|----------|---------------|--------------|--------------------------|------------------------------------------------------------|
| augustus-1-processed-gene-374.14-mRNA-1 | NA | NA       |               | Os01g0852900 | OsR498G0102348900.01.T02 | Pentatricopeptide repeat-containing protein 70 (Fragment)  |
| augustus-1-processed-gene-375.16-mRNA-1 | NA | Indica   |               | Os05g0449200 | OsR498G0102354500.01.T01 | Putative hydroxycinnamoyl transferase                      |
| augustus-1-processed-gene-375.19-mRNA-1 | NA | NA       |               | Os01g0854800 | OsR498G0102357300.01.T01 |                                                            |
| augustus-1-processed-gene-375.7-mRNA-1  | NA | NA       |               | Os01g0853600 | OsR498G0102351500.01.T06 |                                                            |
| augustus-1-processed-gene-375.8-mRNA-1  | NA | NA       |               | Os01g0853800 | OsR498G0102352900.01.T01 | C2 domain-containing protein (Fragment)                    |
| augustus-1-processed-gene-377.1-mRNA-1  | NA | Indica   |               | Os01g0856800 | OsR498G0102367500.01.T02 | Pleckstrin like domain-containing protein 1                |
| augustus-1-processed-gene-378.2-mRNA-1  | NA | NA       |               | Os01g0858900 | OsR498G0102373300.01.T01 | Beta-galactoside alpha-2                                   |
| augustus-1-processed-gene-378.7-mRNA-1  | NA | Indica   |               | Os01g0858500 | OsR498G0102372800.01.T02 | Transcription initiation factor TFIID subunit like         |
| augustus-1-processed-gene-379.1-mRNA-1  | NA | Indica   |               | Os02g0321900 | OsR498G0102379100.01.T01 | Acidic endochitinase-like                                  |
| augustus-1-processed-gene-379.21-mRNA-1 | NA | NA       |               | Os01g0862600 | OsR498G0102384500.01.T02 | Senescence regulator                                       |
| augustus-1-processed-gene-379.3-mRNA-1  | NA | Japonica |               | Os01g0860500 | OsR498G0102379300.01.T01 | Acidic endochitinase                                       |
| augustus-1-processed-gene-379.4-mRNA-1  | NA | Japonica |               | Os01g0860601 | OsR498G0408525900.01.T04 | Ferredoxin                                                 |
| augustus-1-processed-gene-379.6-mRNA-1  | NA | NA       |               | Os01g0860800 | OsR498G0102380900.01.T06 | Glucan endo-1,3-beta-glucosidase 7                         |
| augustus-1-processed-gene-380.21-mRNA-1 | NA | NA       |               | Os01g0864200 | OsR498G0102390500.01.T01 |                                                            |
| augustus-1-processed-gene-381.58-mRNA-1 | NA | Japonica |               | Os01g0866200 | OsR498G0611661000.01.T01 | Histone domain-containing protein (Fragment)               |
| augustus-1-processed-gene-383.49-mRNA-1 | NA | NA       |               | 0            | OsR498G0102409300.01.T01 | Peptidase A1 domain-containing protein (Fragment)          |
| augustus-1-processed-gene-383.50-mRNA-1 | NA | NA       |               | 0            | OsR498G0102409700.01.T01 | Subtilisin-like protease                                   |
| augustus-1-processed-gene-383.60-mRNA-1 | NA | NA       |               | Os01g0868900 | OsR498G0102409900.01.T01 | Subtilisin-like protease preproenzyme                      |
| augustus-1-processed-gene-383.64-mRNA-1 | NA | NA       | Kinase-TM     | Os01g0869900 | OsR498G0102413500.01.T01 | Serine/threonine-protein kinase SAPK4                      |
| augustus-1-processed-gene-384.53-mRNA-1 | NA | Indica   | Kinase-TM     | Os01g0889900 | OsR498G0102416100.01.T01 | Receptor-like serine/threonine-protein kinase              |
| augustus-1-processed-gene-384.55-mRNA-1 | NA | NA       |               | Os01g0871200 |                          | Zinc finger protein STOP1 like                             |
| augustus-1-processed-gene-385.46-mRNA-1 | NA | NA       |               | Os01g0872300 |                          |                                                            |
| augustus-1-processed-gene-385.47-mRNA-1 | NA | NA       |               |              |                          | Putative amino acid/peptide transporter                    |
| augustus-1-processed-gene-385.63-mRNA-1 | NA | NA       |               | Os01g0873700 | OsR498G0102425300.01.T01 | Probable magnesium transporter                             |
| augustus-1-processed-gene-387.31-mRNA-1 | NA | NA       |               | 0            | OsR498G0102439100.01.T03 | RRM domain-containing protein                              |
| augustus-1-processed-gene-387.47-mRNA-1 | NA | NA       |               | 0            | OsR498G0102440700.01.T02 | RNA-binding family protein isoform 1                       |
| augustus-1-processed-gene-388.1-mRNA-1  | NA | NA       |               | Os01g0878100 |                          |                                                            |
| augustus-1-processed-gene-388.16-mRNA-1 | NA | NA       |               | Os01g0879200 | OsR498G0102448100.01.T01 | Dirigent protein (Fragment)                                |
| augustus-1-processed-gene-388.17-mRNA-1 | NA | Indica   |               | Os01g0879200 | OsR498G0102448300.01.T01 | Dirigent protein (Fragment)                                |
| augustus-1-processed-gene-388.18-mRNA-1 | NA | NA       |               | Os01g0879400 | OsR498G0102448300.01.T03 | Glycosyl hydrolase family protein 43 isoform 2             |
| augustus-1-processed-gene-388.2-mRNA-1  | NA | NA       | Kinase-LRR-TM | Os01g0878300 | OsR498G0102446100.01.T01 | receptor-like protein kinase HAIKU2                        |
| augustus-1-processed-gene-389.30-mRNA-1 | NA | Indica   |               | Os01g0881400 | OsR498G0102458500.01.T01 | DRMBL domain-containing protein                            |
| augustus-1-processed-gene-389.31-mRNA-1 | NA | NA       |               | 0            | OsR498G0408669000.01.T01 | Leucine Rich Repeat family protein, expressed              |
| augustus-1-processed-gene-389.33-mRNA-1 | NA | Japonica |               | Os01g0881800 | OsR498G0611598700.01.T01 |                                                            |
| augustus-1-processed-gene-39.63-mRNA-1  | NA | NA       |               | Os04g0384000 |                          |                                                            |
| augustus-1-processed-gene-39.73-mRNA-1  | NA | NA       |               | Os01g0176800 | OsR498G0100256900.01.T01 |                                                            |
| augustus-1-processed-gene-390.36-mRNA-1 | NA | NA       |               | Os01g0882400 |                          | DUF679 domain membrane protein 2                           |
| augustus-1-processed-gene-390.53-mRNA-1 | NA | NA       | Kinase-TM     | Os01g0883000 |                          | Receptor-like protein kinase                               |
| augustus-1-processed-gene-390.54-mRNA-1 | NA | Indica   | Kinase-TM     | Os10g0492400 | OsR498G0102463700.01.T01 | Tyrosine-protein kinase                                    |
| augustus-1-processed-gene-391.41-mRNA-1 | NA | NA       |               | Os01g0884800 |                          | Pentatricopeptide repeat-containing protein, mitochondrial |
| augustus-1-processed-gene-392.0-mRNA-1  | NA | NA       | Kinase-TM     | Os01g0885700 | OsR498G0102473900.01.T01 | Serine/threonine-protein kinase                            |
| augustus-1-processed-gene-392.14-mRNA-1 | NA | NA       |               | Os01g0886700 |                          |                                                            |
| augustus-1-processed-gene-393.14-mRNA-1 | NA | NA       |               | Os01g0888800 | OsR498G0102485500.01.T01 |                                                            |
| augustus-1-processed-gene-393.17-mRNA-1 | NA | NA       |               | Os01g0889400 | OsR498G0102487900.01.T03 | LOB domain-containing protein 6                            |
| augustus-1-processed-gene-394.52-mRNA-1 | NA | NA       | LRR-TM        | Os01g0891700 | OsR498G0102493700.01.T01 | RNA polymerase Rpb7-like, N-terminal domain                |
| augustus-1-processed-gene-395.38-mRNA-1 | NA | Japonica |               | Os01g0892200 | OsR498G0102495900.01.T01 | Receptor protein kinase-like                               |
| augustus-1-processed-gene-395.39-mRNA-1 | NA | NA       | LRR-TM        | Os01g0892300 | OsR498G0102496500.01.T01 | Putative systemin receptor SR160                           |
| augustus-1-processed-gene-395.54-mRNA-1 | NA | NA       | Kinase-TM     | Os01g0892800 | OsR498G0102498100.01.T02 | Dual specificity protein kinase shkC                       |
| augustus-1-processed-gene-396.14-mRNA-1 | NA | NA       |               | Os01g0895500 | OsR498G0102505500.01.T01 | RHOMBOLD-like protein 13 isoform B                         |
| augustus-1-processed-gene-396.15-mRNA-1 | NA | NA       |               | 0            | OsR498G0102505900.01.T05 |                                                            |
| augustus-1-processed-gene-396.16-mRNA-1 | NA | Indica   |               | Os01g0896200 | OsR498G0102505900.01.T01 | Putative membrane-associated protein, chloroplastic        |
| augustus-1-processed-gene-397.1-mRNA-1  | NA | NA       |               | 0            | OsR498G0102508900.01.T01 | Pentatricopeptide repeat-containing protein, mitochondrial |
| augustus-1-processed-gene-397.2-mRNA-1  | NA | NA       |               | 0            | OsR498G0102509100.01.T01 | Beta-glucosidase 42                                        |
| augustus-1-processed-gene-399.32-mRNA-1 | NA | NA       |               | 0            | OsR498G0204768400.01.T01 | Epstein-Barr virus EBNA-1-like                             |
| augustus-1-processed-gene-399.39-mRNA-1 | NA | NA       |               | 0            | OsR498G0511427100.01.T01 | Epstein-Barr virus EBNA-1-like                             |
| augustus-1-processed-gene-40.0-mRNA-1   | NA | NA       |               | Os01g0177100 | OsR498G0100258100.01.T04 | Transcriptional corepressor LEUNIG                         |
| augustus-1-processed-gene-400.58-mRNA-1 | NA | NA       |               | 0            | OsR498G0203809100.01.T01 | DUF834 domain-containing protein                           |
| augustus-1-processed-gene-400.99-mRNA-1 | NA | NA       |               | Os01g0904400 | OsR498G0102533400.01.T01 | SMC hinge domain-containing protein                        |
| augustus-1-processed-gene-401.33-mRNA-1 | NA | Indica   |               | Os01g0627933 | OsR498G0101582200.01.T01 | Cytochrome P450 monooxygenase                              |
| augustus-1-processed-gene-401.35-mRNA-1 | NA | NA       |               | Os01g0626900 | OsR498G0101580000.01.T02 | Transcription factor bHLH144                               |
| augustus-1-processed-gene-402.34-mRNA-1 | NA | Japonica |               | Os01g0625900 | OsR498G0511414500.01.T01 | Transcription repressor                                    |

|                                         |    |          |               |              |                          |                                                              |
|-----------------------------------------|----|----------|---------------|--------------|--------------------------|--------------------------------------------------------------|
| augustus-1-processed-gene-402.51-mRNA-1 | NA | NA       |               | Os01g0624700 | OsR498G0101574800.01.T01 | DNA-binding WRKY                                             |
| augustus-1-processed-gene-402.54-mRNA-1 | NA | NA       |               | Os01g0624000 | OsR498G0101573400.01.T02 | Neutral ceramidase                                           |
| augustus-1-processed-gene-403.32-mRNA-1 | NA | NA       | LRR-TM        | 0            | OsR498G0101567200.01.T01 | Protein TOO MANY MOUTHS like                                 |
| augustus-1-processed-gene-404.12-mRNA-1 | NA | Japonica |               | Os01g0620300 | OsR498G0101559000.01.T01 | Glycosyltransferase                                          |
| augustus-1-processed-gene-404.26-mRNA-1 | NA | NA       |               | 0            | OsR498G0101560700.01.T01 |                                                              |
| augustus-1-processed-gene-407.14-mRNA-1 | NA | NA       | NBS-TM        | Os01g0615500 | OsR498G0101542000.01.T01 | ATPase, coupled to transmembrane movement of substances      |
| augustus-1-processed-gene-408.30-mRNA-1 | NA | NA       |               | Os01g0614500 | OsR498G0101538800.01.T03 | UBP1-associated protein 2C isoform A                         |
| augustus-1-processed-gene-408.46-mRNA-1 | NA | Indica   |               | Os05g0468700 | OsR498G0101534400.01.T01 | Ammonium transporter                                         |
| augustus-1-processed-gene-409.0-mRNA-1  | NA | NA       |               | Os01g0612600 | OsR498G0101530400.01.T06 | Putative zinc finger, RING/FYVE/PHD-type                     |
| augustus-1-processed-gene-409.8-mRNA-1  | NA | NA       |               | Os01g0611900 | OsR498G0101526600.01.T05 | Fertility restorer homologue-like                            |
| augustus-1-processed-gene-410.48-mRNA-1 | NA | Indica   |               | Os01g0342700 | OsR498G0101517800.01.T03 | ABCG subfamily transporter protein                           |
| augustus-1-processed-gene-412.37-mRNA-1 | NA | Indica   | Kinase-LRR-TM | Os05g0588250 | OsR498G0101507200.01.T01 | Serine/threonine protein kinase                              |
| augustus-1-processed-gene-412.51-mRNA-1 | NA | NA       |               | 0            | OsR498G0101501800.01.T01 |                                                              |
| augustus-1-processed-gene-413.2-mRNA-1  | NA | Japonica |               | Os01g0606100 | OsR498G0101500000.01.T01 |                                                              |
| augustus-1-processed-gene-413.21-mRNA-1 | NA | NA       |               | Os01g0604500 | OsR498G0101494400.01.T03 | Probable calcium-binding protein CML14                       |
| augustus-1-processed-gene-413.39-mRNA-1 | NA | NA       |               | 0            | OsR498G0101498300.01.T01 | C3HC-type domain-containing protein (Fragment)               |
| augustus-1-processed-gene-415.8-mRNA-1  | NA | Japonica |               | Os01g0601000 | OsR498G0101477000.01.T01 | Putative magnesium transporter CorA-like family protein-like |
| augustus-1-processed-gene-416.48-mRNA-1 | NA | NA       |               | Os01g0598400 | OsR498G0101471400.01.T01 | FBD domain-containing protein (Fragment)                     |
| augustus-1-processed-gene-418.44-mRNA-1 | NA | NA       |               | Os01g0594900 | OsR498G0101459200.01.T01 | Retinoic acid induced 1                                      |
| augustus-1-processed-gene-419.13-mRNA-1 | NA | NA       |               | Os01g0658300 |                          | GlutaminyI-tRNA synthetase                                   |
| augustus-1-processed-gene-420.13-mRNA-1 | NA | NA       |               | Os01g0841700 | OsR498G0102309900.01.T01 | Elicitor-responsive protein 1                                |
| augustus-1-processed-gene-420.15-mRNA-1 | NA | NA       |               | Os01g0842200 | OsR498G0102311900.01.T03 | Transcription factor GRAS                                    |
| augustus-1-processed-gene-422.0-mRNA-1  | NA | Indica   |               | Os01g0844900 | OsR498G0102321300.01.T01 | Transcription factor LUX                                     |
| augustus-1-processed-gene-422.11-mRNA-1 | NA | NA       |               | Os01g0846400 |                          |                                                              |
| augustus-1-processed-gene-422.15-mRNA-1 | NA | NA       |               |              |                          | Ultraviolet-B receptor UVR8                                  |
| augustus-1-processed-gene-425.30-mRNA-1 | NA | Indica   |               | Os08g0487300 | OsR498G0102000100.01.T01 | Transposon protein, putative, Mutator sub-class, expressed   |
| augustus-1-processed-gene-425.42-mRNA-1 | NA | NA       |               | Os01g0851600 | OsR498G0102344100.01.T01 | 3-oxo-5-alpha-steroid 4-dehydrogenase                        |
| augustus-1-processed-gene-426.0-mRNA-1  | NA | NA       |               | Os01g0852900 | OsR498G0102348900.01.T02 | Pentatricopeptide repeat-containing protein 70 (Fragment)    |
| augustus-1-processed-gene-426.14-mRNA-1 | NA | NA       |               | Os01g0853800 | OsR498G0102352900.01.T01 | C2 domain-containing protein (Fragment)                      |
| augustus-1-processed-gene-426.16-mRNA-1 | NA | Indica   |               | Os05g0449200 | OsR498G0102354500.01.T01 | Putative hydroxycinnamoyl transferase                        |
| augustus-1-processed-gene-426.3-mRNA-1  | NA | NA       |               | Os01g0853600 | OsR498G0102351500.01.T06 |                                                              |
| augustus-1-processed-gene-427.0-mRNA-1  | NA | NA       |               | Os01g0854800 | OsR498G0102357300.01.T01 |                                                              |
| augustus-1-processed-gene-428.9-mRNA-1  | NA | Indica   |               | Os01g0856800 | OsR498G0102367500.01.T02 | Pleckstrin likey domain-containing protein 1                 |
| augustus-1-processed-gene-429.51-mRNA-1 | NA | NA       |               | Os01g0858900 | OsR498G0102373300.01.T01 | Beta-galactoside alpha-2                                     |
| augustus-1-processed-gene-429.63-mRNA-1 | NA | Indica   |               | Os01g0858500 | OsR498G0102372800.01.T02 | Transcription initiation factor TFIID subunit like           |
| augustus-1-processed-gene-430.13-mRNA-1 | NA | Indica   |               | Os02g0321900 | OsR498G0102379100.01.T01 | Acidic endochitinase-like                                    |
| augustus-1-processed-gene-430.15-mRNA-1 | NA | Japonica |               | Os01g0860500 | OsR498G0102379300.01.T01 | Acidic endochitinase                                         |
| augustus-1-processed-gene-430.16-mRNA-1 | NA | Japonica |               | Os01g0860601 | OsR498G0408525900.01.T04 | Ferredoxin                                                   |
| augustus-1-processed-gene-430.18-mRNA-1 | NA | NA       |               | Os01g0860800 | OsR498G0102380900.01.T06 | Glucan endo-1,3-beta-glucosidase 7                           |
| augustus-1-processed-gene-431.15-mRNA-1 | NA | NA       |               | Os01g0862600 | OsR498G0102384500.01.T02 | Senescence regulator                                         |
| augustus-1-processed-gene-432.18-mRNA-1 | NA | NA       |               | Os01g0864200 | OsR498G0102390500.01.T01 |                                                              |
| augustus-1-processed-gene-433.60-mRNA-1 | NA | Japonica |               | Os01g0866200 | OsR498G0611661000.01.T01 | Histone domain-containing protein (Fragment)                 |
| augustus-1-processed-gene-434.7-mRNA-1  | NA | NA       |               | 0            | OsR498G0102409300.01.T01 | Peptidase A1 domain-containing protein (Fragment)            |
| augustus-1-processed-gene-434.8-mRNA-1  | NA | NA       |               | 0            | OsR498G0102409700.01.T01 | Subtilisin-like protease                                     |
| augustus-1-processed-gene-434.9-mRNA-1  | NA | NA       |               | Os01g0868900 | OsR498G0102409900.01.T01 | Subtilisin-like protease preproenzyme                        |
| augustus-1-processed-gene-435.41-mRNA-1 | NA | NA       | Kinase-TM     | Os01g0869900 | OsR498G0102413500.01.T01 | Serine/threonine-protein kinase SAPK4                        |
| augustus-1-processed-gene-435.54-mRNA-1 | NA | Indica   | Kinase-TM     | Os01g0889900 | OsR498G0102416100.01.T01 | Receptor-like serine/threonine-protein kinase                |
| augustus-1-processed-gene-435.56-mRNA-1 | NA | NA       |               | Os01g0871200 |                          | Zinc finger protein STOP1 like                               |
| augustus-1-processed-gene-436.19-mRNA-1 | NA | NA       |               | Os01g0872300 |                          |                                                              |
| augustus-1-processed-gene-436.20-mRNA-1 | NA | NA       |               |              |                          | Putative amino acid/peptide transporter                      |
| augustus-1-processed-gene-437.29-mRNA-1 | NA | NA       |               | Os01g0873700 | OsR498G0102425300.01.T01 | Probable magnesium transporter                               |
| augustus-1-processed-gene-438.43-mRNA-1 | NA | NA       |               | 0            | OsR498G0102439100.01.T03 | RRM domain-containing protein                                |
| augustus-1-processed-gene-438.47-mRNA-1 | NA | NA       |               | 0            | OsR498G0102440700.01.T02 | RNA-binding family protein isoform 1                         |
| augustus-1-processed-gene-439.39-mRNA-1 | NA | NA       |               | Os01g0878100 |                          |                                                              |
| augustus-1-processed-gene-439.40-mRNA-1 | NA | NA       | Kinase-LRR-TM | Os01g0878300 | OsR498G0102446100.01.T01 | receptor-like protein kinase HAIKU2                          |
| augustus-1-processed-gene-439.43-mRNA-1 | NA | NA       |               | Os01g0879200 | OsR498G0102448100.01.T01 | Dirigent protein (Fragment)                                  |
| augustus-1-processed-gene-439.44-mRNA-1 | NA | Indica   |               | Os01g0879200 | OsR498G0102448300.01.T01 | Dirigent protein (Fragment)                                  |
| augustus-1-processed-gene-439.45-mRNA-1 | NA | NA       |               | Os01g0879400 | OsR498G0102448300.01.T03 | Glycosyl hydrolase family protein 43 isoform 2               |
| augustus-1-processed-gene-441.19-mRNA-1 | NA | NA       |               | Os01g0882400 |                          | DUF679 domain membrane protein 2                             |
| augustus-1-processed-gene-441.2-mRNA-1  | NA | NA       |               | 0            | OsR498G0408669000.01.T01 | Leucine Rich Repeat family protein, expressed                |
| augustus-1-processed-gene-441.20-mRNA-1 | NA | NA       | Kinase-TM     | Os01g0883000 |                          | Receptor-like protein kinase                                 |

|                                         |    |          |               |              |                          |                                                                     |
|-----------------------------------------|----|----------|---------------|--------------|--------------------------|---------------------------------------------------------------------|
| augustus-1-processed-gene-441.21-mRNA-1 | NA | Indica   | Kinase-TM     | Os10g0492400 | OsR498G0102463700.01.T01 | Tyrosine-protein kinase                                             |
| augustus-1-processed-gene-441.4-mRNA-1  | NA | Japonica |               | Os01g0881800 | OsR498G0611598700.01.T01 |                                                                     |
| augustus-1-processed-gene-442.9-mRNA-1  | NA | NA       |               | Os01g0884800 |                          | Pentatricopeptide repeat-containing protein, mitochondrial          |
| augustus-1-processed-gene-443.42-mRNA-1 | NA | NA       | Kinase-TM     | Os01g0885700 | OsR498G0102473900.01.T01 | Serine/threonine-protein kinase                                     |
| augustus-1-processed-gene-443.55-mRNA-1 | NA | NA       |               | Os01g0886700 |                          |                                                                     |
| augustus-1-processed-gene-444.12-mRNA-1 | NA | NA       |               | Os01g0888800 | OsR498G0102485500.01.T01 |                                                                     |
| augustus-1-processed-gene-445.37-mRNA-1 | NA | NA       |               | Os01g0889400 | OsR498G0102487900.01.T03 | LOB domain-containing protein 6                                     |
| augustus-1-processed-gene-446.16-mRNA-1 | NA | NA       | LRR-TM        | Os01g0892300 | OsR498G0102496500.01.T01 | Putative systemin receptor SR160                                    |
| augustus-1-processed-gene-446.17-mRNA-1 | NA | NA       | Kinase-TM     | Os01g0892800 | OsR498G0102498100.01.T02 | Dual specificity protein kinase shkC                                |
| augustus-1-processed-gene-446.3-mRNA-1  | NA | NA       | LRR-TM        | Os01g0891700 | OsR498G0102493700.01.T01 | RNA polymerase Rpb7-like, N-terminal domain                         |
| augustus-1-processed-gene-447.15-mRNA-1 | NA | NA       |               | Os01g0895500 | OsR498G0102505500.01.T01 | RHOMBOLD-like protein 13 isoform B                                  |
| augustus-1-processed-gene-447.16-mRNA-1 | NA | NA       |               | 0            | OsR498G0102505900.01.T05 |                                                                     |
| augustus-1-processed-gene-447.17-mRNA-1 | NA | Indica   |               | Os01g0896200 | OsR498G0102505900.01.T01 | Putative membrane-associated protein, chloroplastic                 |
| augustus-1-processed-gene-448.61-mRNA-1 | NA | NA       |               | 0            | OsR498G0102508900.01.T01 | Pentatricopeptide repeat-containing protein, mitochondrial          |
| augustus-1-processed-gene-448.62-mRNA-1 | NA | NA       |               | 0            | OsR498G0102509100.01.T01 | Beta-glucosidase 42                                                 |
| augustus-1-processed-gene-45.5-mRNA-1   | NA | NA       |               | 0            | OsR498G0100283300.01.T01 | Alkane hydroxylase MAH1                                             |
| augustus-1-processed-gene-45.6-mRNA-1   | NA | NA       |               | Os01g0183600 |                          | Alkane hydroxylase MAH1                                             |
| augustus-1-processed-gene-450.32-mRNA-1 | NA | NA       |               | 0            | OsR498G0204768400.01.T01 | Epstein-Barr virus EBNA-1-like                                      |
| augustus-1-processed-gene-450.35-mRNA-1 | NA | NA       |               | 0            | OsR498G0511427100.01.T01 | Epstein-Barr virus EBNA-1-like                                      |
| augustus-1-processed-gene-451.63-mRNA-1 | NA | NA       |               | 0            | OsR498G0203809100.01.T01 | DUF834 domain-containing protein                                    |
| augustus-1-processed-gene-452.46-mRNA-1 | NA | NA       |               | Os01g0904400 | OsR498G0102533400.01.T01 | SMC hinge domain-containing protein                                 |
| augustus-1-processed-gene-452.52-mRNA-1 | NA | Indica   |               | Os01g0627933 | OsR498G0101582200.01.T01 | Cytochrome P450 monooxygenase                                       |
| augustus-1-processed-gene-452.54-mRNA-1 | NA | NA       |               | Os01g0626900 | OsR498G0101580000.01.T02 | Transcription factor bHLH144                                        |
| augustus-1-processed-gene-453.34-mRNA-1 | NA | Japonica |               | Os01g0625900 | OsR498G0511414500.01.T01 | Transcription repressor                                             |
| augustus-1-processed-gene-453.39-mRNA-1 | NA | NA       |               | Os01g0624700 | OsR498G0101574800.01.T01 | DNA-binding WRKY                                                    |
| augustus-1-processed-gene-453.63-mRNA-1 | NA | NA       |               | 0            | OsR498G0101575300.01.T01 |                                                                     |
| augustus-1-processed-gene-454.25-mRNA-1 | NA | NA       |               | Os01g0624000 | OsR498G0101573400.01.T02 | Neutral ceramidase                                                  |
| augustus-1-processed-gene-454.40-mRNA-1 | NA | NA       | LRR-TM        | 0            | OsR498G0101567200.01.T01 | Protein TOO MANY MOUTHS like                                        |
| augustus-1-processed-gene-455.25-mRNA-1 | NA | NA       |               | 0            | OsR498G0101560700.01.T01 |                                                                     |
| augustus-1-processed-gene-456.0-mRNA-1  | NA | Japonica |               | Os01g0620300 | OsR498G0101559000.01.T01 | Glycosyltransferase                                                 |
| augustus-1-processed-gene-459.1-mRNA-1  | NA | NA       | NBS-TM        | Os01g0615500 | OsR498G0101542000.01.T01 | ATPase, coupled to transmembrane movement of substances             |
| augustus-1-processed-gene-459.14-mRNA-1 | NA | NA       |               | Os01g0614500 | OsR498G0101538800.01.T03 | UBP1-associated protein 2C isoform A                                |
| augustus-1-processed-gene-459.20-mRNA-1 | NA | Indica   |               | Os05g0468700 | OsR498G0101534400.01.T01 | Ammonium transporter                                                |
| augustus-1-processed-gene-460.36-mRNA-1 | NA | NA       |               | Os01g0612600 | OsR498G0101530400.01.T06 | Putative zinc finger, RING/FYVE/PHD-type                            |
| augustus-1-processed-gene-460.39-mRNA-1 | NA | NA       |               | Os01g0611900 | OsR498G0101526600.01.T05 | Fertility restorer homologue-like                                   |
| augustus-1-processed-gene-462.20-mRNA-1 | NA | Indica   |               | Os01g0342700 | OsR498G0101517800.01.T03 | ABCG subfamily transporter protein                                  |
| augustus-1-processed-gene-463.44-mRNA-1 | NA | Indica   | Kinase-LRR-TM | Os05g0588250 | OsR498G0101507200.01.T01 | Serine/threonine protein kinase                                     |
| augustus-1-processed-gene-464.26-mRNA-1 | NA | NA       |               | 0            | OsR498G0101501800.01.T01 |                                                                     |
| augustus-1-processed-gene-464.42-mRNA-1 | NA | Japonica |               | Os01g0606100 | OsR498G0101500000.01.T01 |                                                                     |
| augustus-1-processed-gene-465.21-mRNA-1 | NA | NA       |               | Os01g0604500 | OsR498G0101494400.01.T03 | Probable calcium-binding protein CML14                              |
| augustus-1-processed-gene-466.5-mRNA-1  | NA | NA       | LRR-TM        | Os01g0601700 |                          | LRR receptor-like serine/threonine-protein kinase GSO1              |
| augustus-1-processed-gene-467.32-mRNA-1 | NA | Japonica |               | Os01g0601000 | OsR498G0101477000.01.T01 | Putative magnesium transporter CorA-like family protein-like        |
| augustus-1-processed-gene-469.13-mRNA-1 | NA | NA       |               | Os01g0594900 | OsR498G0101459200.01.T01 | Retinoic acid induced 1                                             |
| augustus-1-processed-gene-47.12-mRNA-1  | NA | NA       |               | 0            | OsR498G0100299500.01.T01 | Probable metal-nicotianamine transporter YSL7                       |
| augustus-1-processed-gene-470.16-mRNA-1 | NA | Japonica |               | Os01g0905550 | OsR498G0408694600.01.T01 |                                                                     |
| augustus-1-processed-gene-491.57-mRNA-1 | NA | Japonica |               | Os01g0941500 | OsR498G0102675900.01.T01 | Endo-1,3-beta-glucanase                                             |
| augustus-1-processed-gene-492.24-mRNA-1 | NA | NA       |               | 0            | OsR498G0102681100.01.T07 | Retrotransposon protein, putative, unclassified                     |
| augustus-1-processed-gene-492.26-mRNA-1 | NA | NA       |               | Os01g0943000 | OsR498G0102681300.01.T01 | PHD finger protein ING                                              |
| augustus-1-processed-gene-495.27-mRNA-1 | NA | NA       |               | Os01g0949300 | OsR498G0102700100.01.T01 | Calcium-binding protein CML36                                       |
| augustus-1-processed-gene-497.0-mRNA-1  | NA | NA       |               | Os01g0952500 | OsR498G0102709300.01.T01 | Two-component response regulator ARR8                               |
| augustus-1-processed-gene-497.11-mRNA-1 | NA | NA       |               | Os03g0110200 |                          | Transposon protein, putative, Mutator sub-class                     |
| augustus-1-processed-gene-497.12-mRNA-1 | NA | NA       |               | Os01g0953801 |                          | AT-hook motif nuclear-localized protein 17                          |
| augustus-1-processed-gene-497.6-mRNA-1  | NA | Japonica |               | Os01g0952900 | OsR498G0510749100.01.T01 | DNA-directed RNA polymerase II 13.6 kDa polypeptide family protein  |
| augustus-1-processed-gene-50.38-mRNA-1  | NA | NA       |               |              |                          | Transposon protein, putative, Mutator sub-class                     |
| augustus-1-processed-gene-500.77-mRNA-1 | NA | NA       |               | Os01g0958200 | OsR498G0102735100.01.T01 | G-type lectin S-receptor-like serine/threonine-protein kinase SD2-5 |
| augustus-1-processed-gene-503.63-mRNA-1 | NA | NA       |               | Os01g0966300 | OsR498G0102757100.01.T05 | Mitochondrial processing peptidase                                  |
| augustus-1-processed-gene-504.2-mRNA-1  | NA | Indica   |               | Os07g0533600 | OsR498G0102759300.01.T01 | Peptidase A1 domain-containing protein (Fragment)                   |
| augustus-1-processed-gene-508.32-mRNA-1 | NA | NA       |               |              |                          | Retrotransposon protein, putative, unclassified, expressed          |
| augustus-1-processed-gene-510.49-mRNA-1 | NA | NA       |               | Os01g0819800 |                          | Putative pentatricopeptide repeat-containing protein, mitochondrial |
| augustus-1-processed-gene-54.38-mRNA-1  | NA | NA       |               | 0            | OsR498G0100348300.01.T01 | Lachrymatory-factor synthase-like                                   |
| augustus-1-processed-gene-54.42-mRNA-1  | NA | Japonica |               | Os01g0200200 | OsR498G0100351500.01.T01 | AIR carboxylase                                                     |

|                                          |    |          |           |              |                          |                                                                           |
|------------------------------------------|----|----------|-----------|--------------|--------------------------|---------------------------------------------------------------------------|
| augustus-1-processed-gene-55.21-mRNA-1   | NA | NA       |           | Os01g0200500 | OsR498G0100352500.01.T01 | Nuclear pore complex protein NUP35                                        |
| augustus-1-processed-gene-58.64-mRNA-1   | NA | Indica   |           | Os01g0205300 | OsR498G0100374100.01.T03 | Protein-serine/threonine phosphatase                                      |
| augustus-1-processed-gene-58.66-mRNA-1   | NA | Japonica |           | Os01g0205600 | OsR498G0511225400.01.T02 | Carnitine racemase like protein                                           |
| augustus-1-processed-gene-58.69-mRNA-1   | NA | Indica   | Kinase-TM | Os01g0206300 | OsR498G0100377100.01.T01 | Non-specific serine/threonine protein kinase                              |
| augustus-1-processed-gene-59.22-mRNA-1   | NA | NA       |           | Os01g0207700 | OsR498G0100380900.01.T01 |                                                                           |
| augustus-1-processed-gene-66.31-mRNA-1   | NA | NA       |           |              |                          | Transposable element protein, putative, MuDR                              |
| augustus-1-processed-gene-67.44-mRNA-1   | NA | Indica   | Kinase-TM | Os01g0222800 | OsR498G0100443500.01.T01 | Serine/threonine-protein kinase                                           |
| augustus-1-processed-gene-67.45-mRNA-1   | NA | NA       | Kinase-TM | 0            | OsR498G0100443900.01.T01 | Serine/threonine-protein kinase                                           |
| augustus-1-processed-gene-68.2-mRNA-1    | NA | NA       |           | Os01g0223300 | OsR498G0100445300.01.T01 | Arginyl-tRNA synthetase                                                   |
| augustus-1-processed-gene-81.20-mRNA-1   | NA | NA       |           | 0            | OsR498G0100538900.01.T01 |                                                                           |
| augustus-1-processed-gene-81.36-mRNA-1   | NA | NA       |           | Os01g0246300 |                          |                                                                           |
| augustus-1-processed-gene-81.53-mRNA-1   | NA | NA       |           | 0            | OsR498G0100545200.01.T01 | Retrotransposon protein, putative, unclassified, expressed                |
| augustus-1-processed-gene-82.47-mRNA-1   | NA | NA       |           | Os01g0248701 |                          | Heterodimeric geranylgeranyl pyrophosphate synthase large subunit 1 like  |
| augustus-1-processed-gene-83.15-mRNA-1   | NA | NA       |           |              |                          | HAD-superfamily hydrolase, subfamily IG, 5'-nucleotidase                  |
| augustus-1-processed-gene-83.16-mRNA-1   | NA | NA       |           | Os01g0251100 | OsR498G0100557300.01.T01 | Ribosomal protein L3 plastid isoform 1                                    |
| augustus-1-processed-gene-84.15-mRNA-1   | NA | Japonica |           | Os01g0253200 | OsR498G0100563100.01.T01 | PMEI domain-containing protein (Fragment)                                 |
| augustus-1-processed-gene-84.17-mRNA-1   | NA | NA       |           | Os01g0253500 | OsR498G0100564100.01.T01 |                                                                           |
| augustus-1-processed-gene-85.8-mRNA-1    | NA | NA       |           | 0            | OsR498G0100570400.01.T01 | PGG domain-containing protein                                             |
| augustus-1-processed-gene-86.0-mRNA-1    | NA | NA       |           | 0            | OsR498G0100573000.01.T01 |                                                                           |
| augustus-1-processed-gene-89.32-mRNA-1   | NA | NA       |           | Os01g0261600 | OsR498G0100598700.01.T01 | 2-alpha-hydroxytaxane 2-O-benzoyltransferase                              |
| augustus-1-processed-gene-91.37-mRNA-1   | NA | NA       |           | Os01g0264600 |                          | Phytochrome kinase substrate 1                                            |
| augustus-1-processed-gene-91.62-mRNA-1   | NA | NA       |           | Os01g0265300 |                          | Transposon protein, putative, Mutator sub-class, expressed                |
| augustus-1-processed-gene-92.34-mRNA-1   | NA | NA       |           | 0            | OsR498G0100616300.01.T02 | ATP-dependent DNA helicase                                                |
| augustus-1-processed-gene-92.47-mRNA-1   | NA | Japonica |           | Os01g0267300 | OsR498G0100622500.01.T01 | SERPIN domain-containing protein (Fragment)                               |
| augustus-1-processed-gene-93.35-mRNA-1   | NA | NA       | Kinase-TM | Os01g0267800 | OsR498G0100624700.01.T01 | serine/threonine-protein kinase-like protein At5g23170                    |
| augustus-1-processed-gene-93.46-mRNA-1   | NA | NA       |           | Os01g0268800 | OsR498G0100628700.01.T01 | Rhomboid-like protein 20                                                  |
| augustus-10-processed-gene-0.10-mRNA-1   | NA | NA       |           | 0            | OsR498G1017992100.01.T01 |                                                                           |
| augustus-10-processed-gene-0.12-mRNA-1   | NA | NA       |           | 0            | OsR498G1017992100.01.T01 |                                                                           |
| augustus-10-processed-gene-0.14-mRNA-1   | NA | NA       |           | 0            | OsR498G1017992100.01.T01 |                                                                           |
| augustus-10-processed-gene-0.2-mRNA-1    | NA | NA       |           | 0            | OsR498G1017992100.01.T01 |                                                                           |
| augustus-10-processed-gene-0.4-mRNA-1    | NA | NA       |           | 0            | OsR498G1017992100.01.T01 |                                                                           |
| augustus-10-processed-gene-0.6-mRNA-1    | NA | NA       |           | 0            | OsR498G1017992100.01.T01 |                                                                           |
| augustus-10-processed-gene-0.8-mRNA-1    | NA | NA       |           | 0            | OsR498G1017992100.01.T01 |                                                                           |
| augustus-10-processed-gene-104.0-mRNA-1  | NA | Indica   |           | Os10g0427800 | OsR498G1018759900.01.T02 | BTB/POZ domain containing protein, expressed                              |
| augustus-10-processed-gene-104.22-mRNA-1 | NA | Japonica |           | Os10g0428900 | OsR498G1018762100.01.T01 | BTB/POZ domain containing protein, expressed                              |
| augustus-10-processed-gene-114.17-mRNA-1 | NA | NA       |           | Os04g0168100 |                          | Transcriptional regulator SUPERMAN like                                   |
| augustus-10-processed-gene-117.2-mRNA-1  | NA | NA       |           | Os04g0165200 |                          | Protein SENSITIVE TO PROTON RHIZOTOXICITY 1                               |
| augustus-10-processed-gene-117.23-mRNA-1 | NA | NA       |           | Os04g0162800 | OsR498G0407600700.01.T01 |                                                                           |
| augustus-10-processed-gene-119.8-mRNA-1  | NA | NA       |           | Os04g0155000 | OsR498G0407588200.01.T01 |                                                                           |
| augustus-10-processed-gene-124.2-mRNA-1  | NA | NA       |           | Os04g0147200 | OsR498G0407555600.01.T01 |                                                                           |
| augustus-10-processed-gene-135.23-mRNA-1 | NA | NA       |           | Os04g0128400 | OsR498G0407503200.01.T01 |                                                                           |
| augustus-10-processed-gene-141.13-mRNA-1 | NA | NA       |           | Os04g0115900 |                          |                                                                           |
| augustus-10-processed-gene-145.37-mRNA-1 | NA | NA       |           | Os04g0109500 | OsR498G0407445000.01.T01 | L-type lectin-domain containing receptor kinase V.7                       |
| augustus-10-processed-gene-148.12-mRNA-1 | NA | NA       |           | Os04g0103900 | OsR498G0407422800.01.T01 | Chalcone synthase G                                                       |
| augustus-10-processed-gene-153.26-mRNA-1 | NA | NA       |           | 0            | OsR498G1018823300.01.T01 |                                                                           |
| augustus-10-processed-gene-154.0-mRNA-1  | NA | NA       |           | Os02g0212975 | OsR498G0202873200.01.T01 |                                                                           |
| augustus-10-processed-gene-154.2-mRNA-1  | NA | NA       |           | Os07g0606000 | OsR498G0101315000.01.T01 |                                                                           |
| augustus-10-processed-gene-162.0-mRNA-1  | NA | NA       |           | Os10g0463900 | OsR498G1018861500.01.T01 | Translation initiation factor IF-2-like                                   |
| augustus-10-processed-gene-162.20-mRNA-1 | NA | NA       |           | Os10g0465700 | OsR498G1018865300.01.T01 | Beta-amylase 1, chloroplastic                                             |
| augustus-10-processed-gene-17.15-mRNA-1  | NA | Japonica |           | Os10g0122500 | OsR498G1018066900.01.T01 | Putative O-deacetyl/baccatin III-10-O-acetyltransferase                   |
| augustus-10-processed-gene-17.2-mRNA-1   | NA | NA       |           | Os10g0122000 | OsR498G1018063500.01.T01 | Glycosyltransferase                                                       |
| augustus-10-processed-gene-27.20-mRNA-1  | NA | Indica   |           | Os10g0137700 | OsR498G1018116300.01.T01 | F-box domain containing protein, expressed                                |
| augustus-10-processed-gene-27.24-mRNA-1  | NA | NA       |           |              |                          | Retrotransposon protein, putative, Ty3-gypsy sub-class                    |
| augustus-10-processed-gene-28.44-mRNA-1  | NA | Indica   |           | Os10g0123200 | OsR498G1018122500.01.T01 | F-box domain containing protein, expressed                                |
| augustus-10-processed-gene-28.45-mRNA-1  | NA | NA       |           | Os10g0141600 |                          | F-box domain-containing protein                                           |
| augustus-10-processed-gene-29.2-mRNA-1   | NA | NA       |           | Os10g0142500 | OsR498G1018125100.01.T01 | F-box domain containing protein, expressed                                |
| augustus-10-processed-gene-29.3-mRNA-1   | NA | NA       | Kinase    | Os10g0142600 | OsR498G1018125300.01.T01 | Receptor-like protein kinase FERONIA                                      |
| augustus-10-processed-gene-38.5-mRNA-1   | NA | Japonica | Kinase-TM | Os10g0157400 | OsR498G1018161300.01.T01 | Putative cyclin-dependent kinase F-2                                      |
| augustus-10-processed-gene-39.13-mRNA-1  | NA | NA       |           | Os10g0158700 | OsR498G1018182700.01.T01 | Fatty acyl-CoA reductase                                                  |
| augustus-10-processed-gene-47.2-mRNA-1   | NA | NA       |           | Os10g0165000 | OsR498G1018231300.01.T01 | Core-2/l-branching beta-16-N-acetylglucosaminyltransferase family protein |
| augustus-10-processed-gene-53.12-mRNA-1  | NA | NA       |           |              |                          |                                                                           |

|                                          |    |          |               |              |                          |                                                                      |
|------------------------------------------|----|----------|---------------|--------------|--------------------------|----------------------------------------------------------------------|
| augustus-10-processed-gene-61.1-mRNA-1   | NA | Indica   |               | Os10g0351300 | OsR498G1018303700.01.T01 | Cytochrome P450 family protein, expressed                            |
| augustus-10-processed-gene-64.22-mRNA-1  | NA | Indica   |               | Os10g0190000 | OsR498G1018319700.01.T01 | UBC core domain-containing protein (Fragment)                        |
| augustus-10-processed-gene-65.2-mRNA-1   | NA | NA       |               | 0            | OsR498G0815762600.01.T01 |                                                                      |
| augustus-10-processed-gene-65.7-mRNA-1   | NA | NA       |               | Os10g0191900 | OsR498G1018325900.01.T01 | Nuclear factor Y transcription factor                                |
| augustus-10-processed-gene-66.26-mRNA-1  | NA | NA       |               | 0            | OsR498G0407827200.01.T01 | Retrotransposon protein, putative, LINE subclass                     |
| augustus-10-processed-gene-72.25-mRNA-1  | NA | NA       |               |              |                          | Retrotransposon protein, putative, unclassified                      |
| augustus-10-processed-gene-74.15-mRNA-1  | NA | NA       |               |              |                          | Hydroxyproline-rich glycoprotein-like                                |
| augustus-10-processed-gene-78.14-mRNA-1  | NA | NA       |               |              |                          | SAP domain-containing protein (Fragment)                             |
| augustus-10-processed-gene-79.1-mRNA-1   | NA | NA       |               |              |                          | Endonuclease                                                         |
| augustus-10-processed-gene-79.5-mRNA-1   | NA | NA       |               | 0            | OsR498G0101349400.01.T01 | Splicing coactivator subunit-like                                    |
| augustus-10-processed-gene-80.22-mRNA-1  | NA | Indica   | Kinase-LRR-TM | Os11g0692100 | OsR498G1018382300.01.T01 | Leucine-rich repeat receptor kinase-type protein                     |
| augustus-10-processed-gene-84.25-mRNA-1  | NA | NA       |               | 0            | OsR498G1018392700.01.T01 |                                                                      |
| augustus-10-processed-gene-88.24-mRNA-1  | NA | NA       |               |              |                          | Transposon protein, putative, Mutator sub-class, expressed           |
| augustus-10-processed-gene-9.12-mRNA-1   | NA | Indica   | Kinase-TM     | Os10g0152000 | OsR498G1018033700.01.T01 | Wall-associated receptor kinase 2                                    |
| augustus-10-processed-gene-92.16-mRNA-1  | NA | NA       |               | 0            | OsR498G0101349400.01.T01 | Splicing coactivator subunit-like                                    |
| augustus-10-processed-gene-96.11-mRNA-1  | NA | NA       |               | 0            | OsR498G1018413900.01.T01 |                                                                      |
| augustus-10-processed-gene-98.1-mRNA-1   | NA | NA       |               | Os10g0317900 | OsR498G1018420100.01.T01 | Flavonoid 3'-monooxygenase                                           |
| augustus-10-processed-gene-98.2-mRNA-1   | NA | NA       |               | 0            | OsR498G1018420500.01.T07 |                                                                      |
| augustus-11-processed-gene-0.21-mRNA-1   | NA | NA       |               | 0            | OsR498G1119277500.01.T02 |                                                                      |
| augustus-11-processed-gene-0.48-mRNA-1   | NA | Indica   |               | Os12g0118800 | OsR498G1119298400.01.T01 | RNase H domain-containing protein                                    |
| augustus-11-processed-gene-0.51-mRNA-1   | NA | Indica   |               | Os12g0118800 | OsR498G1119298400.01.T01 |                                                                      |
| augustus-11-processed-gene-147.18-mRNA-1 | NA | NA       |               | Os11g0490100 | OsR498G1120164300.01.T01 | Plant-specific domain TIGR01627 family protein                       |
| augustus-11-processed-gene-148.2-mRNA-1  | NA | NA       |               | Os11g0490300 |                          | Neurogenic protein mastermind                                        |
| augustus-11-processed-gene-150.17-mRNA-1 | NA | NA       |               | 0            | OsR498G0713993600.01.T01 | Transposon protein, putative, unclassified                           |
| augustus-11-processed-gene-150.38-mRNA-1 | NA | NA       |               | Os04g0184800 | OsR498G0204883800.01.T01 | Transposon protein, putative, Mutator sub-class, expressed           |
| augustus-11-processed-gene-157.0-mRNA-1  | NA | NA       |               | Os07g0513300 |                          | Transposon protein, putative, Mutator sub-class, expressed           |
| augustus-11-processed-gene-157.1-mRNA-1  | NA | NA       |               | 0            | OsR498G0511427100.01.T01 | Epstein-Barr virus EBNA-1-like                                       |
| augustus-11-processed-gene-158.44-mRNA-1 | NA | NA       |               | Os01g0265300 | OsR498G0100612800.01.T01 | PMD domain-containing protein (Fragment)                             |
| augustus-11-processed-gene-16.32-mRNA-1  | NA | NA       |               |              |                          | Transposon protein, putative, Mutator sub-class, expressed           |
| augustus-11-processed-gene-161.17-mRNA-1 | NA | NA       |               | Os07g0513300 |                          | Transposon protein, putative, Mutator sub-class, expressed           |
| augustus-11-processed-gene-163.11-mRNA-1 | NA | NA       |               | 0            | OsR498G1120235900.01.T03 | Protein kinase domain-containing protein                             |
| augustus-11-processed-gene-168.13-mRNA-1 | NA | NA       |               | Os11g0532200 |                          |                                                                      |
| augustus-11-processed-gene-180.30-mRNA-1 | NA | NA       | LRR-NBS-TM    | Os11g0550500 | OsR498G1120333300.01.T05 | Disease resistance protein RPM1                                      |
| augustus-11-processed-gene-186.19-mRNA-1 | NA | NA       |               | 0            | OsR498G0101028200.01.T01 |                                                                      |
| augustus-11-processed-gene-194.0-mRNA-1  | NA | NA       | CC-NBS-TM     | Os11g0598300 | OsR498G1120448400.01.T01 | Leucine Rich Repeat family protein, expressed                        |
| augustus-11-processed-gene-199.11-mRNA-1 | NA | NA       |               | Os12g0468900 | OsR498G0510503700.01.T01 | Cell wall protein-like                                               |
| augustus-11-processed-gene-206.5-mRNA-1  | NA | Indica   |               | Os07g0298700 | OsR498G1119745100.01.T01 | Cell wall protein-like                                               |
| augustus-11-processed-gene-208.33-mRNA-1 | NA | NA       | NBS-TM        | Os11g0605100 |                          | NB-ARC domain containing protein, expressed                          |
| augustus-11-processed-gene-21.19-mRNA-1  | NA | NA       |               | 0            | OsR498G1119455500.01.T01 |                                                                      |
| augustus-11-processed-gene-211.0-mRNA-1  | NA | Japonica |               | Os11g0609900 | OsR498G0204795800.01.T02 | RNB domain-containing protein                                        |
| augustus-11-processed-gene-211.12-mRNA-1 | NA | Japonica |               | Os11g0609900 | OsR498G0204795800.01.T02 | RNB domain-containing protein                                        |
| augustus-11-processed-gene-219.3-mRNA-1  | NA | NA       |               | Os11g0624000 | OsR498G1120539100.01.T01 | Kinesin-domain-containing protein                                    |
| augustus-11-processed-gene-222.8-mRNA-1  | NA | NA       |               | 0            | OsR498G1120702200.01.T01 | ATP-dependent DNA helicase                                           |
| augustus-11-processed-gene-229.22-mRNA-1 | NA | NA       |               | Os11g0641300 | OsR498G1120617100.01.T01 | Laccase                                                              |
| augustus-11-processed-gene-229.9-mRNA-1  | NA | NA       | CC-LRR-NBS    | Os11g0640700 | OsR498G1120614900.01.T02 | Leucine Rich Repeat family protein, expressed                        |
| augustus-11-processed-gene-230.17-mRNA-1 | NA | Indica   |               | Os11g0515000 | OsR498G1120623900.01.T01 | Armado/beta-catenin-like repeat family protein, expressed            |
| augustus-11-processed-gene-230.18-mRNA-1 | NA | NA       |               | Os11g0643100 | OsR498G1120624500.01.T01 | Tryptamine hydroxycinnamoyl transferase                              |
| augustus-11-processed-gene-230.23-mRNA-1 | NA | NA       | LRR-TM        | Os11g0644100 | OsR498G1120628100.01.T01 | Leucine-rich repeat receptor-like kinase protein THICK TASSEL DWARF1 |
| augustus-11-processed-gene-24.14-mRNA-1  | NA | NA       |               | Os07g0693100 | OsR498G1018918700.01.T01 | Pyruvate decarboxylase                                               |
| augustus-11-processed-gene-243.9-mRNA-1  | NA | Japonica |               | Os11g0664133 | OsR498G1120691200.01.T01 | Cytokinin-regulated kinase-like                                      |
| augustus-11-processed-gene-248.0-mRNA-1  | NA | NA       |               |              |                          | Transposon protein, putative, CACTA, En/Spm sub-class                |
| augustus-11-processed-gene-250.13-mRNA-1 | NA | NA       |               | Os08g0402700 | OsR498G1221669700.01.T01 |                                                                      |
| augustus-11-processed-gene-252.35-mRNA-1 | NA | NA       | NBS-TM        | Os11g0684100 | OsR498G1120735400.01.T01 | NBS-LRR disease resistance protein homologue-like                    |
| augustus-11-processed-gene-253.11-mRNA-1 | NA | Indica   |               | Os05g0479700 | OsR498G1120733900.01.T01 | NBS-LRR disease resistance protein homologue-like                    |
| augustus-11-processed-gene-256.22-mRNA-1 | NA | NA       | Kinase-TM     | Os11g0691240 | OsR498G1120759300.01.T01 | Wall associated kinase-like                                          |
| augustus-11-processed-gene-26.13-mRNA-1  | NA | NA       |               | Os07g0569100 | OsR498G0714601400.01.T02 | Remorin, C-terminal region                                           |
| augustus-11-processed-gene-26.15-mRNA-1  | NA | NA       |               | Os11g0192400 | OsR498G1119549500.01.T01 | Pectinesterase                                                       |
| augustus-11-processed-gene-26.27-mRNA-1  | NA | NA       |               | Os11g0192500 | OsR498G1119548300.01.T01 | Pectinesterase                                                       |
| augustus-11-processed-gene-26.29-mRNA-1  | NA | NA       |               | Os11g0193800 | OsR498G1119549700.01.T01 | Pectinesterase                                                       |
| augustus-11-processed-gene-26.34-mRNA-1  | NA | NA       |               | Os11g0191800 | OsR498G1119549700.01.T01 | Pectinesterase                                                       |
| augustus-11-processed-gene-26.51-mRNA-1  | NA | NA       |               |              |                          | Transposon protein, putative, CACTA, En/Spm sub-class                |



|                                          |    |          |            |              |                          |                                                                          |
|------------------------------------------|----|----------|------------|--------------|--------------------------|--------------------------------------------------------------------------|
| augustus-11-processed-gene-26.56-mRNA-1  | NA | NA       |            | Os11g0192400 | OsR498G1119549500.01.T01 | Pectinesterase                                                           |
| augustus-11-processed-gene-261.13-mRNA-1 | NA | Indica   |            | Os11g0701600 | OsR498G1120763100.01.T01 | Xylanase inhibitor protein 2                                             |
| augustus-11-processed-gene-261.14-mRNA-1 | NA | Indica   |            | Os11g0701500 | OsR498G1120763100.01.T01 | Xylanase inhibitor protein 2                                             |
| augustus-11-processed-gene-261.22-mRNA-1 | NA | Japonica |            | Os11g0703000 | OsR498G1221905100.01.T01 | Pathogenesis-related protein 5                                           |
| augustus-11-processed-gene-261.3-mRNA-1  | NA | NA       |            | Os11g0701400 | OsR498G1120762700.01.T01 | Xylanase inhibitor protein 2                                             |
| augustus-11-processed-gene-262.22-mRNA-1 | NA | NA       |            | Os11g0705200 | OsR498G1120771100.01.T01 | GRAS transcription factor                                                |
| augustus-11-processed-gene-40.28-mRNA-1  | NA | Indica   |            | Os11g0562100 | OsR498G1119541700.01.T01 | Terpene cyclase/mutase family member                                     |
| augustus-11-processed-gene-41.20-mRNA-1  | NA | NA       |            | Os11g0194600 | OsR498G1119545900.01.T01 | PMEI domain-containing protein                                           |
| augustus-11-processed-gene-41.22-mRNA-1  | NA | NA       |            | Os11g0192400 | OsR498G1119549500.01.T01 | Pectinesterase                                                           |
| augustus-11-processed-gene-41.23-mRNA-1  | NA | Japonica |            | Os11g0194600 | OsR498G1119545900.01.T01 | PMEI domain-containing protein                                           |
| augustus-11-processed-gene-43.45-mRNA-1  | NA | Japonica | NBS-TM     | Os11g0263000 | OsR498G1119746200.01.T02 | Similar to NBS-LRR disease resistance protein homologue                  |
| augustus-11-processed-gene-48.12-mRNA-1  | NA | NA       |            |              |                          | Endonuclease                                                             |
| augustus-11-processed-gene-61.32-mRNA-1  | NA | NA       |            |              |                          | Transposon protein, putative, Mutator sub-class, expressed               |
| augustus-11-processed-gene-62.24-mRNA-1  | NA | NA       |            | Os11g0191800 | OsR498G1119549700.01.T01 | Pectinesterase                                                           |
| augustus-11-processed-gene-65.0-mRNA-1   | NA | NA       |            | 0            | OsR498G1119565900.01.T01 | PGG domain-containing protein                                            |
| augustus-11-processed-gene-67.13-mRNA-1  | NA | NA       |            | Os06g0272601 | OsR498G0204300200.01.T01 |                                                                          |
| augustus-11-processed-gene-69.17-mRNA-1  | NA | NA       |            | Os11g0206600 | OsR498G1119583900.01.T05 | Mitochondrial transcription termination factor-like                      |
| augustus-11-processed-gene-75.40-mRNA-1  | NA | Japonica |            | Os11g0214100 | OsR498G1119617700.01.T01 | Ribonuclease H                                                           |
| augustus-11-processed-gene-81.30-mRNA-1  | NA | NA       |            |              |                          |                                                                          |
| augustus-11-processed-gene-81.31-mRNA-1  | NA | NA       |            | 0            | OsR498G1221454800.01.T01 |                                                                          |
| augustus-11-processed-gene-83.15-mRNA-1  | NA | NA       | LRR-NBS-TM | Os11g0229400 | OsR498G1119649900.01.T03 | NBS-LRR type protein (Fragment)                                          |
| augustus-11-processed-gene-83.16-mRNA-1  | NA | Japonica | LRR-NBS-TM | Os11g0227800 | OsR498G1119650700.01.T02 | NBS-LRR type protein (Fragment)                                          |
| augustus-12-processed-gene-1.57-mRNA-1   | NA | NA       |            | 0            | OsR498G1119275700.01.T01 | PRESSED FLOWER a                                                         |
| augustus-12-processed-gene-113.8-mRNA-1  | NA | Indica   |            | Os12g0288600 | OsR498G1221339400.01.T01 | Coilin                                                                   |
| augustus-12-processed-gene-114.41-mRNA-1 | NA | NA       |            | 0            | OsR498G1221348100.01.T02 | Helicase and polymerase-containing protein TEBICHI                       |
| augustus-12-processed-gene-115.12-mRNA-1 | NA | NA       |            |              |                          | Transposon protein, putative, Mutator sub-class, expressed               |
| augustus-12-processed-gene-115.14-mRNA-1 | NA | NA       |            |              |                          | RNA-directed DNA polymerase                                              |
| augustus-12-processed-gene-12.45-mRNA-1  | NA | NA       |            | Os12g0124700 | OsR498G1220863300.01.T01 | Cell division control protein 45                                         |
| augustus-12-processed-gene-12.47-mRNA-1  | NA | NA       |            | Os12g0125200 |                          |                                                                          |
| augustus-12-processed-gene-123.17-mRNA-1 | NA | Indica   |            | Os12g0285100 | OsR498G1221322300.01.T01 | Disease resistance protein                                               |
| augustus-12-processed-gene-133.13-mRNA-1 | NA | NA       |            | 0            | OsR498G1221406900.01.T01 |                                                                          |
| augustus-12-processed-gene-134.14-mRNA-1 | NA | NA       |            | 0            | OsR498G1221411100.01.T01 | NAC domain-containing protein (Fragment)                                 |
| augustus-12-processed-gene-138.17-mRNA-1 | NA | NA       |            | 0            | OsR498G1221436100.01.T01 | Retrotransposon protein, putative, unclassified                          |
| augustus-12-processed-gene-139.33-mRNA-1 | NA | NA       |            | 0            | OsR498G0408153000.01.T01 | Splicing coactivator subunit-like                                        |
| augustus-12-processed-gene-14.53-mRNA-1  | NA | NA       |            | Os12g0127800 | OsR498G1220872300.01.T01 | VQ motif family protein, expressed                                       |
| augustus-12-processed-gene-140.32-mRNA-1 | NA | NA       |            | 0            | OsR498G1221433700.01.T04 | HECT-type E3 ubiquitin transferase                                       |
| augustus-12-processed-gene-142.18-mRNA-1 | NA | Indica   |            | Os12g0431100 | OsR498G1221439900.01.T01 | Adenosinetriphosphatase                                                  |
| augustus-12-processed-gene-145.1-mRNA-1  | NA | NA       |            | Os11g0515000 | OsR498G1120218800.01.T01 | Armadillo/beta-catenin-like repeat family protein, expressed             |
| augustus-12-processed-gene-146.12-mRNA-1 | NA | NA       |            | Os12g0432600 | OsR498G1221448500.01.T01 | Retrotransposon protein, putative, Ty1-copia subclass                    |
| augustus-12-processed-gene-159.7-mRNA-1  | NA | NA       |            | Os04g0120000 | OsR498G0509881000.01.T01 | Hydroxyproline-rich glycoprotein-like                                    |
| augustus-12-processed-gene-165.3-mRNA-1  | NA | Japonica |            | Os12g0453500 | OsR498G1221528600.01.T01 |                                                                          |
| augustus-12-processed-gene-167.22-mRNA-1 | NA | Japonica |            | Os12g0456100 | OsR498G1221540900.01.T05 | Putative pentatricopeptide repeat-containing protein mitochondrial       |
| augustus-12-processed-gene-170.7-mRNA-1  | NA | NA       |            |              |                          | AT hook motif-containing protein, putative, expressed                    |
| augustus-12-processed-gene-175.12-mRNA-1 | NA | Japonica |            | Os12g0467700 | OsR498G1221572700.01.T01 | Adenosinetriphosphatase                                                  |
| augustus-12-processed-gene-175.16-mRNA-1 | NA | Japonica |            | Os12g0467700 | OsR498G1221572700.01.T01 | Adenosinetriphosphatase                                                  |
| augustus-12-processed-gene-175.2-mRNA-1  | NA | Japonica |            | Os12g0467200 | OsR498G1221571300.01.T01 |                                                                          |
| augustus-12-processed-gene-18.10-mRNA-1  | NA | NA       |            | Os12g0194400 | OsR498G1221077900.01.T02 | BZIP type transcription factor                                           |
| augustus-12-processed-gene-2.4-mRNA-1    | NA | NA       |            | 0            | OsR498G1119280300.01.T01 | IBR domain-containing protein                                            |
| augustus-12-processed-gene-2.5-mRNA-1    | NA | NA       |            | 0            | OsR498G1119280500.01.T01 | rRNA N-glycosidase                                                       |
| augustus-12-processed-gene-201.22-mRNA-1 | NA | NA       |            | Os08g0487300 | OsR498G0204883800.01.T01 | Transposon protein, putative, Mutator sub-class                          |
| augustus-12-processed-gene-209.10-mRNA-1 | NA | NA       | Kinase     | 0            | OsR498G1221718300.01.T01 | probable serine/threonine-protein kinase PIX13 isoform X2                |
| augustus-12-processed-gene-211.34-mRNA-1 | NA | NA       |            |              |                          | Transposon protein, putative, Mutator sub-class, expressed               |
| augustus-12-processed-gene-215.8-mRNA-1  | NA | NA       |            | 0            | OsR498G0511427100.01.T01 | Epstein-Barr virus EBNA-1-like                                           |
| augustus-12-processed-gene-216.15-mRNA-1 | NA | NA       |            | 0            | OsR498G1221761900.01.T01 | FBD domain-containing protein                                            |
| augustus-12-processed-gene-217.11-mRNA-1 | NA | NA       |            |              |                          | Ribonuclease H-like domain, reverse transcriptase, RNA-dependent DNA pol |
| augustus-12-processed-gene-217.2-mRNA-1  | NA | Indica   |            | Os12g0535900 | OsR498G1221764900.01.T01 | Plus3 domain-containing protein (Fragment)                               |
| augustus-12-processed-gene-218.22-mRNA-1 | NA | NA       |            | Os12g0538600 | OsR498G1221773900.01.T01 | Glutaredoxin domain-containing protein (Fragment)                        |
| augustus-12-processed-gene-22.18-mRNA-1  | NA | NA       |            |              |                          | Transposable element protein-like                                        |
| augustus-12-processed-gene-223.16-mRNA-1 | NA | NA       |            | 0            | OsR498G0511427100.01.T01 | Epstein-Barr virus EBNA-1-like                                           |
| augustus-12-processed-gene-224.14-mRNA-1 | NA | NA       |            | 0            | OsR498G1221823300.01.T05 |                                                                          |
| augustus-12-processed-gene-224.15-mRNA-1 | NA | NA       |            | Os12g0545900 | OsR498G1221827700.01.T03 |                                                                          |

|                                          |    |          |               |              |                          |                                                                      |
|------------------------------------------|----|----------|---------------|--------------|--------------------------|----------------------------------------------------------------------|
| augustus-12-processed-gene-226.12-mRNA-1 | NA | NA       |               | Os12g0548300 | OsR498G1221839300.01.T03 | Nucleoside diphosphate kinase                                        |
| augustus-12-processed-gene-234.3-mRNA-1  | NA | Indica   |               | Os12g0563600 | OsR498G1221888700.01.T01 | 26S proteasome non-ATPase regulatory subunit like                    |
| augustus-12-processed-gene-236.19-mRNA-1 | NA | NA       |               | 0            | OsR498G1221902300.01.T01 | Protein kinase domain-containing protein                             |
| augustus-12-processed-gene-238.41-mRNA-1 | NA | NA       |               | Os12g0571800 |                          |                                                                      |
| augustus-12-processed-gene-239.14-mRNA-1 | NA | NA       |               | Os03g0110200 | OsR498G0101158000.01.T01 | Transposon protein, putative, Mutator sub-class, expressed           |
| augustus-12-processed-gene-240.10-mRNA-1 | NA | NA       |               | 0            | OsR498G0511427100.01.T01 | Epstein-Barr virus EBNA-1-like                                       |
| augustus-12-processed-gene-242.0-mRNA-1  | NA | NA       |               | 0            | OsR498G0917889800.01.T02 | Serine/threonine protein phosphatase 2A regulatory subunit           |
| augustus-12-processed-gene-243.22-mRNA-1 | NA | Indica   |               | Os12g0580400 | OsR498G1221944300.01.T01 | Polyamine transporter like                                           |
| augustus-12-processed-gene-243.28-mRNA-1 | NA | NA       |               | Os12g0580900 | OsR498G1221945900.01.T01 | Protein-serine/threonine phosphatase                                 |
| augustus-12-processed-gene-243.42-mRNA-1 | NA | NA       |               | 0            | OsR498G1221946400.01.T01 | inactive tyrosine-protein kinase PRAG1                               |
| augustus-12-processed-gene-245.1-mRNA-1  | NA | NA       |               | Os12g0582900 |                          | Ethylene-responsive transcription factor                             |
| augustus-12-processed-gene-245.13-mRNA-1 | NA | NA       |               | 0            | OsR498G1221960100.01.T01 |                                                                      |
| augustus-12-processed-gene-245.3-mRNA-1  | NA | NA       |               | Os12g0583300 | OsR498G1221957900.01.T01 | Aspartic proteinase nepenthesin-1                                    |
| augustus-12-processed-gene-251.13-mRNA-1 | NA | NA       |               | 0            | OsR498G1222021700.01.T01 |                                                                      |
| augustus-12-processed-gene-255.25-mRNA-1 | NA | NA       |               | Os12g0600000 | OsR498G1222046700.01.T08 |                                                                      |
| augustus-12-processed-gene-258.38-mRNA-1 | NA | NA       |               |              |                          | Protein ROOT HAIR DEFECTIVE 3 homolog                                |
| augustus-12-processed-gene-260.7-mRNA-1  | NA | NA       |               | Os12g0607800 | OsR498G1222076300.01.T01 | DUF295 domain-containing protein                                     |
| augustus-12-processed-gene-262.26-mRNA-1 | NA | NA       |               | Os03g0110200 |                          | Transposon protein, putative, Mutator sub-class, expressed           |
| augustus-12-processed-gene-274.19-mRNA-1 | NA | NA       | Kinase-LRR-TM | Os12g0632800 | OsR498G1222161300.01.T01 | Receptor-like protein kinase HAIKU2                                  |
| augustus-12-processed-gene-275.34-mRNA-1 | NA | NA       |               | Os07g0104400 | OsR498G0713366100.01.T01 | Peroxidase                                                           |
| augustus-12-processed-gene-275.35-mRNA-1 | NA | NA       |               | Os07g0104500 | OsR498G0713366700.01.T01 | Peroxidase                                                           |
| augustus-12-processed-gene-275.36-mRNA-1 | NA | NA       |               | Os07g0104600 | OsR498G0713367100.01.T01 | Peroxidase                                                           |
| augustus-12-processed-gene-276.11-mRNA-1 | NA | NA       |               | Os07g0105800 | OsR498G0713369900.01.T01 | DUF4220 domain-containing protein (Fragment)                         |
| augustus-12-processed-gene-276.14-mRNA-1 | NA | NA       |               | Os07g0106900 | OsR498G0713372700.01.T03 | Dirigent protein (Fragment)                                          |
| augustus-12-processed-gene-276.16-mRNA-1 | NA | NA       |               | Os07g0106900 | OsR498G0713372700.01.T03 | Dirigent protein (Fragment)                                          |
| augustus-12-processed-gene-276.17-mRNA-1 | NA | NA       |               | Os07g0107100 | OsR498G0713372900.01.T01 | Dirigent protein (Fragment)                                          |
| augustus-12-processed-gene-277.13-mRNA-1 | NA | NA       |               | Os07g0108800 | OsR498G0713377900.01.T01 | Outward-rectifying potassium channel                                 |
| augustus-12-processed-gene-279.2-mRNA-1  | NA | NA       |               | 0            | OsR498G0713388900.01.T02 |                                                                      |
| augustus-12-processed-gene-279.20-mRNA-1 | NA | NA       |               | 0            | OsR498G0713391500.01.T01 |                                                                      |
| augustus-12-processed-gene-279.22-mRNA-1 | NA | NA       |               | Os07g0111700 | OsR498G0713392100.01.T02 | Flavin-containing monooxygenase                                      |
| augustus-12-processed-gene-279.23-mRNA-1 | NA | NA       |               | Os07g0111900 | OsR498G0713392900.01.T01 | Flavin-containing monooxygenase                                      |
| augustus-12-processed-gene-28.41-mRNA-1  | NA | NA       |               | Os12g0152200 |                          | DUF295 domain-containing protein                                     |
| augustus-12-processed-gene-28.42-mRNA-1  | NA | NA       |               | 0            | OsR498G1220957500.01.T01 |                                                                      |
| augustus-12-processed-gene-28.43-mRNA-1  | NA | Indica   |               | Os03g0672700 | OsR498G1220958300.01.T01 | Myb-like protein O                                                   |
| augustus-12-processed-gene-28.45-mRNA-1  | NA | NA       |               | 0            | OsR498G1220958700.01.T01 |                                                                      |
| augustus-12-processed-gene-28.46-mRNA-1  | NA | NA       |               | Os12g0153600 | OsR498G1220958900.01.T01 | Luminal-binding protein-like                                         |
| augustus-12-processed-gene-280.34-mRNA-1 | NA | NA       |               |              |                          | AT hook motif-containing protein, putative                           |
| augustus-12-processed-gene-281.37-mRNA-1 | NA | NA       |               | 0            | OsR498G0713406900.01.T01 | QWRF motif-containing protein 2-like                                 |
| augustus-12-processed-gene-282.18-mRNA-1 | NA | NA       |               | Os04g0558900 | OsR498G0409063100.01.T01 | Serine protease                                                      |
| augustus-12-processed-gene-283.72-mRNA-1 | NA | NA       |               | Os04g0562500 | OsR498G0204490700.01.T01 |                                                                      |
| augustus-12-processed-gene-285.36-mRNA-1 | NA | NA       |               | 0            | OsR498G1222106000.01.T05 |                                                                      |
| augustus-12-processed-gene-285.52-mRNA-1 | NA | NA       |               | Os04g0565200 | OsR498G0409082100.01.T01 | Glycosyltransferase                                                  |
| augustus-12-processed-gene-288.2-mRNA-1  | NA | NA       |               | Os04g0568700 | OsR498G0409098300.01.T01 | Heat-responsive transcription factor                                 |
| augustus-12-processed-gene-29.25-mRNA-1  | NA | NA       |               | Os12g0154600 | OsR498G1220961100.01.T01 | TPT domain-containing protein                                        |
| augustus-12-processed-gene-29.41-mRNA-1  | NA | NA       |               | Os12g0156000 | OsR498G1220967900.01.T01 | RING-type domain-containing protein                                  |
| augustus-12-processed-gene-29.43-mRNA-1  | NA | NA       |               | Os12g0156100 | OsR498G1220969300.01.T01 | NAC domain-containing protein 90                                     |
| augustus-12-processed-gene-30.28-mRNA-1  | NA | NA       |               | 0            | OsR498G0307024200.01.T01 | NADH dehydrogenase [ubiquinone] iron-sulfur protein 4, mitochondrial |
| augustus-12-processed-gene-31.18-mRNA-1  | NA | NA       |               | Os12g0159400 | OsR498G1220984300.01.T03 | Protein kinase domain-containing protein                             |
| augustus-12-processed-gene-32.0-mRNA-1   | NA | NA       |               | Os12g0160000 | OsR498G1220985700.01.T01 | Classical arabinogalactan protein 5-like                             |
| augustus-12-processed-gene-41.1-mRNA-1   | NA | NA       |               | 0            | OsR498G0511427100.01.T01 | Epstein-Barr virus EBNA-1-like                                       |
| augustus-12-processed-gene-46.4-mRNA-1   | NA | NA       |               | Os12g0187575 |                          | C2 domain-containing protein (Fragment)                              |
| augustus-12-processed-gene-50.15-mRNA-1  | NA | NA       |               | Os12g0194400 | OsR498G1221077900.01.T02 | BZIP type transcription factor                                       |
| augustus-12-processed-gene-53.32-mRNA-1  | NA | NA       | CC-NBS-TM     | Os12g0199100 |                          | Putative NB-ARC domain-containing protein (Fragment)                 |
| augustus-12-processed-gene-63.26-mRNA-1  | NA | NA       |               | Os02g0212975 | OsR498G0305421900.01.T01 |                                                                      |
| augustus-12-processed-gene-65.10-mRNA-1  | NA | NA       |               | 0            | OsR498G0101531300.01.T02 | Hydroxyproline-rich glycoprotein-like                                |
| augustus-12-processed-gene-67.0-mRNA-1   | NA | NA       |               |              |                          | Ribonuclease G                                                       |
| augustus-12-processed-gene-68.13-mRNA-1  | NA | NA       |               | Os12g0222300 |                          |                                                                      |
| augustus-12-processed-gene-68.16-mRNA-1  | NA | Japonica | LRR-TM        | Os12g0222800 | OsR498G1221130500.01.T01 | Leucine Rich Repeat family protein, expressed                        |
| augustus-12-processed-gene-68.17-mRNA-1  | NA | Japonica | CC-LRR-TM     | Os12g0222900 | OsR498G1221134900.01.T01 | Leucine Rich Repeat family protein, expressed                        |
| augustus-12-processed-gene-7.42-mRNA-1   | NA | Japonica |               | Os12g0114400 | OsR498G1220847000.01.T01 | Pentatricopeptide, putative, expressed                               |
| augustus-12-processed-gene-87.36-mRNA-1  | NA | Indica   |               | Os12g0468900 | OsR498G0100846800.01.T01 | Cell wall protein-like                                               |

|                                         |    |          |           |              |                          |                                                                          |
|-----------------------------------------|----|----------|-----------|--------------|--------------------------|--------------------------------------------------------------------------|
| augustus-12-processed-gene-90.5-mRNA-1  | NA | NA       |           | Os12g0255701 |                          |                                                                          |
| augustus-12-processed-gene-94.9-mRNA-1  | NA | NA       |           |              |                          | Hydroxyproline-rich glycoprotein-like                                    |
| augustus-12-processed-gene-99.4-mRNA-1  | NA | NA       |           | 0            | OsR498G0917372400.01.T01 | BKRF1 encodes EBNA-1 protein-like                                        |
| augustus-2-processed-gene-0.29-mRNA-1   | NA | NA       |           | Os02g0100600 | OsR498G0202798700.01.T01 | Fe2OG dioxygenase domain-containing protein                              |
| augustus-2-processed-gene-0.42-mRNA-1   | NA | NA       |           | 0            | OsR498G0202799400.01.T01 | Transcriptional regulator SUPERMAN                                       |
| augustus-2-processed-gene-1.8-mRNA-1    | NA | NA       |           | 0            | OsR498G0202802400.01.T02 | E3 ubiquitin-protein ligase UPL3                                         |
| augustus-2-processed-gene-10.1-mRNA-1   | NA | NA       | CC-NBS-TM |              |                          | Truncated Sr21                                                           |
| augustus-2-processed-gene-10.15-mRNA-1  | NA | NA       |           | Os02g0119000 | OsR498G0202857500.01.T01 | Truncated Sr21                                                           |
| augustus-2-processed-gene-10.28-mRNA-1  | NA | NA       |           | Os02g0119700 | OsR498G0202860400.01.T05 | Pentatricopeptide repeat-containing protein-like                         |
| augustus-2-processed-gene-105.19-mRNA-1 | NA | NA       |           | 0            | OsR498G0917374600.01.T01 |                                                                          |
| augustus-2-processed-gene-107.15-mRNA-1 | NA | NA       |           | 0            | OsR498G0203428800.01.T01 | 60S ribosomal protein L27                                                |
| augustus-2-processed-gene-107.4-mRNA-1  | NA | NA       |           | Os02g0284500 |                          |                                                                          |
| augustus-2-processed-gene-108.24-mRNA-1 | NA | NA       |           | Os02g0286200 | OsR498G0203432300.01.T01 | Dynamin-related protein 5A isoform B                                     |
| augustus-2-processed-gene-108.31-mRNA-1 | NA | NA       |           | Os02g0285900 |                          | NAC domain-containing protein                                            |
| augustus-2-processed-gene-108.32-mRNA-1 | NA | NA       |           | 0            | OsR498G0203432000.01.T01 | NAC domain-containing protein                                            |
| augustus-2-processed-gene-109.13-mRNA-1 | NA | Japonica |           | Os02g0288200 | OsR498G0203439500.01.T01 |                                                                          |
| augustus-2-processed-gene-109.15-mRNA-1 | NA | NA       |           | 0            | OsR498G0203443100.01.T01 | F-box domain-containing protein (Fragment)                               |
| augustus-2-processed-gene-109.8-mRNA-1  | NA | NA       |           | Os02g0287900 | OsR498G0203438600.01.T01 | F-box domain-containing protein (Fragment)                               |
| augustus-2-processed-gene-109.9-mRNA-1  | NA | NA       |           | Os02g0288000 | OsR498G0203438800.01.T02 | F-box domain-containing protein (Fragment)                               |
| augustus-2-processed-gene-11.65-mRNA-1  | NA | Indica   |           | Os03g0132300 | OsR498G0202868300.01.T04 |                                                                          |
| augustus-2-processed-gene-11.67-mRNA-1  | NA | NA       |           | Os02g0121900 | OsR498G0202869700.01.T01 | Pentatricopeptide repeat-containing protein chloroplastic                |
| augustus-2-processed-gene-114.7-mRNA-1  | NA | Japonica |           | Os02g0297200 | OsR498G0203489200.01.T01 | DUF4220 domain-containing protein (Fragment)                             |
| augustus-2-processed-gene-13.52-mRNA-1  | NA | NA       |           | 0            | OsR498G0511427100.01.T01 | Epstein-Barr virus EBNA-1-like                                           |
| augustus-2-processed-gene-139.1-mRNA-1  | NA | NA       |           | Os10g0162300 |                          | C2H2-type domain-containing protein                                      |
| augustus-2-processed-gene-14.10-mRNA-1  | NA | NA       |           | Os02g0126500 | OsR498G0202882900.01.T04 | Calcium-dependent protein kinase 16                                      |
| augustus-2-processed-gene-15.36-mRNA-1  | NA | NA       |           |              |                          | ADP-ribosylation factor, putative, expressed                             |
| augustus-2-processed-gene-15.53-mRNA-1  | NA | Indica   |           | Os02g0129600 | OsR498G0202895300.01.T05 | Beta-amylase                                                             |
| augustus-2-processed-gene-15.67-mRNA-1  | NA | NA       |           | 0            | OsR498G0202896000.01.T02 |                                                                          |
| augustus-2-processed-gene-15.68-mRNA-1  | NA | NA       | CC-TM     | Os02g0129800 |                          | Response to low sulfur 3                                                 |
| augustus-2-processed-gene-158.24-mRNA-1 | NA | NA       |           | 0            | OsR498G0203751900.01.T06 | PORR domain-containing protein (Fragment)                                |
| augustus-2-processed-gene-158.28-mRNA-1 | NA | Indica   |           | Os12g0506100 | OsR498G0203753500.01.T01 |                                                                          |
| augustus-2-processed-gene-158.36-mRNA-1 | NA | Japonica |           | Os02g0463700 | OsR498G0203750400.01.T01 | ATP-dependent DNA helicase                                               |
| augustus-2-processed-gene-159.16-mRNA-1 | NA | NA       |           | Os02g0466400 | OsR498G0203760300.01.T01 | Inositol-tetrakisphosphate 1-kinase                                      |
| augustus-2-processed-gene-159.27-mRNA-1 | NA | NA       |           | Os02g0465600 | OsR498G0203757400.01.T01 | Kelch repeat-containing F-box-like protein                               |
| augustus-2-processed-gene-159.32-mRNA-1 | NA | NA       |           | 0            | OsR498G0203761600.01.T02 |                                                                          |
| augustus-2-processed-gene-16.0-mRNA-1   | NA | NA       |           | Os02g0129900 | OsR498G0202897300.01.T01 | PGAP1 domain-containing protein                                          |
| augustus-2-processed-gene-16.12-mRNA-1  | NA | NA       |           | 0            | OsR498G0202902100.01.T01 | Putative heat shock protein (Fragment)                                   |
| augustus-2-processed-gene-16.14-mRNA-1  | NA | NA       |           | Os02g0131600 | OsR498G0202903900.01.T01 | Mitochondrial import receptor subunit TOM9-2 like                        |
| augustus-2-processed-gene-16.23-mRNA-1  | NA | NA       |           | Os02g0131000 | OsR498G0202901600.01.T01 |                                                                          |
| augustus-2-processed-gene-160.13-mRNA-1 | NA | NA       |           | 0            | OsR498G0203766700.01.T01 | Wax synthase isoform 1                                                   |
| augustus-2-processed-gene-160.16-mRNA-1 | NA | Japonica |           | Os02g0468500 | OsR498G0203768900.01.T01 | Fertility restorer homologue A-like                                      |
| augustus-2-processed-gene-161.34-mRNA-1 | NA | NA       |           | Os02g0469000 | OsR498G0203772700.01.T01 |                                                                          |
| augustus-2-processed-gene-161.38-mRNA-1 | NA | NA       |           | Os02g0468800 | OsR498G0203772600.01.T01 | Selenium binding protein-like protein                                    |
| augustus-2-processed-gene-165.7-mRNA-1  | NA | NA       |           | Os08g0487300 | OsR498G0816350400.01.T01 | Transposon protein, putative, Mutator sub-class                          |
| augustus-2-processed-gene-166.21-mRNA-1 | NA | NA       | LRR-TM    | 0            | OsR498G0203803900.01.T01 | NB-ARC domain-containing protein                                         |
| augustus-2-processed-gene-17.56-mRNA-1  | NA | NA       |           | Os02g0132500 | OsR498G0202907000.01.T03 | basic leucine zipper 43                                                  |
| augustus-2-processed-gene-17.59-mRNA-1  | NA | NA       |           | 0            | OsR498G0202908600.01.T01 |                                                                          |
| augustus-2-processed-gene-173.18-mRNA-1 | NA | NA       |           | Os02g0489500 | OsR498G0203838700.01.T01 | S-adenosyl-L-methionine-dependent methyltransferases superfamily protein |
| augustus-2-processed-gene-18.45-mRNA-1  | NA | NA       |           |              |                          | SMC hinge domain-containing protein                                      |
| augustus-2-processed-gene-18.61-mRNA-1  | NA | NA       |           | Os02g0134200 | OsR498G0202913200.01.T01 |                                                                          |
| augustus-2-processed-gene-185.27-mRNA-1 | NA | Japonica |           | Os02g0507900 | OsR498G1018954900.01.T01 | Harpin-induced protein-related-like                                      |
| augustus-2-processed-gene-187.10-mRNA-1 | NA | Japonica |           | Os02g0511400 | OsR498G0203905300.01.T04 | Cis-2,3-dihydrobiphenyl-2,3-diol dehydrogenase                           |
| augustus-2-processed-gene-19.45-mRNA-1  | NA | NA       |           | Os02g0135800 | OsR498G0202919300.01.T04 | Protein transport protein SEC13 homolog B                                |
| augustus-2-processed-gene-19.46-mRNA-1  | NA | Indica   |           | Os09g0125100 | OsR498G0202919500.01.T01 | CUE domain-containing protein                                            |
| augustus-2-processed-gene-19.49-mRNA-1  | NA | NA       |           | 0            | OsR498G0612390800.01.T01 | DUF834 domain-containing protein                                         |
| augustus-2-processed-gene-19.68-mRNA-1  | NA | NA       |           | Os02g0136800 | OsR498G0202924400.01.T04 | Protein kinase domain-containing protein                                 |
| augustus-2-processed-gene-196.28-mRNA-1 | NA | NA       |           | Os02g0524600 | OsR498G0203968000.01.T02 | WD repeat-containing protein LWD1                                        |
| augustus-2-processed-gene-196.31-mRNA-1 | NA | NA       |           | Os02g0525100 | OsR498G0203968800.01.T01 |                                                                          |
| augustus-2-processed-gene-197.24-mRNA-1 | NA | NA       |           | Os02g0526600 | OsR498G0203974100.01.T01 | PORR domain-containing protein (Fragment)                                |
| augustus-2-processed-gene-197.27-mRNA-1 | NA | NA       |           | Os02g0526700 | OsR498G0203975000.01.T01 |                                                                          |
| augustus-2-processed-gene-198.0-mRNA-1  | NA | NA       |           | Os02g0527900 | OsR498G0203980700.01.T01 | PAN domain-containing protein (Fragment)                                 |

|                                         |    |          |               |              |                          |                                                                       |
|-----------------------------------------|----|----------|---------------|--------------|--------------------------|-----------------------------------------------------------------------|
| augustus-2-processed-gene-198.32-mRNA-1 | NA | NA       |               | 0            | OsR498G0203982600.01.T02 | Virion core protein                                                   |
| augustus-2-processed-gene-199.33-mRNA-1 | NA | NA       |               | Os02g0529600 | OsR498G0203986200.01.T04 | probable xyloglucan 6-xylosyltransferase 5                            |
| augustus-2-processed-gene-199.39-mRNA-1 | NA | Japonica |               | Os02g0530500 | OsR498G0408521900.01.T01 | Protein LITTLE ZIPPER 4                                               |
| augustus-2-processed-gene-20.13-mRNA-1  | NA | NA       |               | Os02g0137600 | OsR498G0202926700.01.T01 | Methyltransferase-like protein 15                                     |
| augustus-2-processed-gene-201.47-mRNA-1 | NA | NA       |               | Os02g0534000 | OsR498G0204000400.01.T01 | Putative suppressor protein SRP40                                     |
| augustus-2-processed-gene-201.65-mRNA-1 | NA | NA       |               | 0            | OsR498G0204005400.01.T01 | PMEI domain-containing protein (Fragment)                             |
| augustus-2-processed-gene-202.13-mRNA-1 | NA | NA       |               | Os02g0536400 | OsR498G0204010100.01.T06 | RRM domain-containing protein                                         |
| augustus-2-processed-gene-204.24-mRNA-1 | NA | NA       |               | 0            | OsR498G1119312200.01.T01 |                                                                       |
| augustus-2-processed-gene-204.31-mRNA-1 | NA | Indica   |               | Os05g0578100 | OsR498G0204021400.01.T01 |                                                                       |
| augustus-2-processed-gene-204.42-mRNA-1 | NA | NA       |               | Os02g0539500 | OsR498G0204025500.01.T01 | VQ motif-containing protein 8, chloroplastic                          |
| augustus-2-processed-gene-204.58-mRNA-1 | NA | NA       |               | Os02g0539200 | OsR498G0204023600.01.T01 | RING-type E3 ubiquitin transferase                                    |
| augustus-2-processed-gene-205.0-mRNA-1  | NA | NA       |               | Os02g0540000 |                          | E3 ubiquitin-protein ligase ATL4                                      |
| augustus-2-processed-gene-205.10-mRNA-1 | NA | Japonica |               | Os02g0540700 | OsR498G0408554900.01.T01 | RING-type E3 ubiquitin transferase                                    |
| augustus-2-processed-gene-205.12-mRNA-1 | NA | NA       |               | Os02g0541000 |                          |                                                                       |
| augustus-2-processed-gene-205.22-mRNA-1 | NA | NA       |               | 0            | OsR498G0611633900.01.T01 |                                                                       |
| augustus-2-processed-gene-206.18-mRNA-1 | NA | NA       |               | Os02g0542400 | OsR498G0204039900.01.T01 | Putative WRKY transcription factor protein 1                          |
| augustus-2-processed-gene-206.41-mRNA-1 | NA | Japonica |               | Os02g0543300 | OsR498G0204043600.01.T01 | Tr-type G domain-containing protein (Fragment)                        |
| augustus-2-processed-gene-206.46-mRNA-1 | NA | NA       |               | 0            | OsR498G0204046800.01.T01 | Circumsporozoite protein-like                                         |
| augustus-2-processed-gene-209.19-mRNA-1 | NA | NA       |               | Os01g0797800 | OsR498G0102143100.01.T01 | Galactose oxidase/kelch repeat superfamily protein, putative          |
| augustus-2-processed-gene-212.53-mRNA-1 | NA | Indica   |               | Os02g0552200 | OsR498G0204097400.01.T01 |                                                                       |
| augustus-2-processed-gene-213.1-mRNA-1  | NA | NA       |               | 0            | OsR498G0511458200.01.T01 |                                                                       |
| augustus-2-processed-gene-221.29-mRNA-1 | NA | NA       |               | 0            | OsR498G0204046800.01.T01 | Epstein-Barr virus EBNA-1-like                                        |
| augustus-2-processed-gene-222.18-mRNA-1 | NA | NA       |               | Os02g0571300 | OsR498G0204151800.01.T05 | Ent-isokaurene synthase                                               |
| augustus-2-processed-gene-223.24-mRNA-1 | NA | NA       |               | Os02g0571900 | OsR498G0204154400.01.T01 | Oryzaalexin E synthase                                                |
| augustus-2-processed-gene-223.41-mRNA-1 | NA | NA       |               | Os02g0572900 |                          | Protein SENSITIVE TO PROTON RHIZOTOXICITY like                        |
| augustus-2-processed-gene-225.20-mRNA-1 | NA | NA       |               | Os02g0575700 | OsR498G0204166900.01.T01 | Putative WRKY transcription factor 19                                 |
| augustus-2-processed-gene-229.20-mRNA-1 | NA | NA       |               | Os11g0519100 |                          |                                                                       |
| augustus-2-processed-gene-229.46-mRNA-1 | NA | Japonica |               | Os03g0721001 | OsR498G0204171500.01.T01 |                                                                       |
| augustus-2-processed-gene-23.24-mRNA-1  | NA | Indica   |               | Os02g0144800 | OsR498G0202945800.01.T01 |                                                                       |
| augustus-2-processed-gene-23.27-mRNA-1  | NA | NA       |               | 0            | OsR498G0202950300.01.T03 | Suppressor of auxin resistance                                        |
| augustus-2-processed-gene-23.31-mRNA-1  | NA | Japonica |               | Os02g0142800 | OsR498G0815259700.01.T01 | Protein kinase domain-containing protein                              |
| augustus-2-processed-gene-230.26-mRNA-1 | NA | NA       |               | 0            | OsR498G0204046800.01.T01 | Circumsporozoite protein-like                                         |
| augustus-2-processed-gene-231.22-mRNA-1 | NA | NA       |               | Os02g0589400 | OsR498G0204208400.01.T01 | Indole-3-acetate beta-glucosyltransferase                             |
| augustus-2-processed-gene-232.18-mRNA-1 | NA | Japonica |               | Os02g0590250 | OsR498G0204209400.01.T01 | Lecithin-cholesterol acyltransferase-like 1                           |
| augustus-2-processed-gene-233.64-mRNA-1 | NA | NA       |               | Os02g0592600 | OsR498G0204219300.01.T08 | PMD domain-containing protein                                         |
| augustus-2-processed-gene-234.36-mRNA-1 | NA | NA       |               | Os02g0594300 |                          | Ethylene-responsive transcription factor LEP                          |
| augustus-2-processed-gene-234.47-mRNA-1 | NA | NA       |               | 0            | OsR498G0204226400.01.T01 | Plant disease resistance polypeptide-like                             |
| augustus-2-processed-gene-235.26-mRNA-1 | NA | Indica   |               | Os02g0596300 | OsR498G0204237200.01.T02 | Cytochrome P450 family 86 subfamily C polypeptide 1                   |
| augustus-2-processed-gene-236.44-mRNA-1 | NA | NA       |               | Os02g0598600 | OsR498G0204244400.01.T01 | F-box domain-containing protein                                       |
| augustus-2-processed-gene-237.21-mRNA-1 | NA | Indica   |               | Os02g0601600 | OsR498G0204251700.01.T01 | Pentatricopeptide repeat-containing protein mitochondrial             |
| augustus-2-processed-gene-237.34-mRNA-1 | NA | NA       |               | 0            | OsR498G0204249800.01.T01 |                                                                       |
| augustus-2-processed-gene-24.18-mRNA-1  | NA | NA       |               | Os02g0144200 | OsR498G0202957700.01.T01 | Arginyl-tRNA synthetase                                               |
| augustus-2-processed-gene-24.2-mRNA-1   | NA | Indica   |               | Os02g0144800 | OsR498G0202945800.01.T01 |                                                                       |
| augustus-2-processed-gene-240.55-mRNA-1 | NA | NA       |               | 0            | OsR498G0204046800.01.T01 | Epstein-Barr virus EBNA-1-like                                        |
| augustus-2-processed-gene-245.29-mRNA-1 | NA | NA       |               | Os06g0272601 | OsR498G0204300200.01.T01 | dNK domain-containing protein                                         |
| augustus-2-processed-gene-245.30-mRNA-1 | NA | NA       |               | 0            | OsR498G0305903000.01.T11 | Beta-secretase 2                                                      |
| augustus-2-processed-gene-245.35-mRNA-1 | NA | NA       |               |              |                          | ATP-dependent DNA helicase                                            |
| augustus-2-processed-gene-246.15-mRNA-1 | NA | NA       | LRR-TM        | 0            | OsR498G0204306700.01.T01 | Leucine-rich repeat-like protein                                      |
| augustus-2-processed-gene-247.15-mRNA-1 | NA | Indica   | LRR-TM        | Os02g0615300 | OsR498G0204309700.01.T01 | Putative LRR receptor-like serine/threonine-protein kinase (Fragment) |
| augustus-2-processed-gene-247.24-mRNA-1 | NA | NA       |               | Os02g0614800 |                          |                                                                       |
| augustus-2-processed-gene-25.11-mRNA-1  | NA | NA       |               | Os02g0144800 | OsR498G0202960700.01.T01 | Arginyl-tRNA synthetase                                               |
| augustus-2-processed-gene-252.14-mRNA-1 | NA | Indica   |               | Os02g0616800 | OsR498G0204322200.01.T01 | rRNA N-glycosidase                                                    |
| augustus-2-processed-gene-254.22-mRNA-1 | NA | NA       |               | 0            | OsR498G0204330800.01.T01 |                                                                       |
| augustus-2-processed-gene-254.25-mRNA-1 | NA | NA       |               | 0            | OsR498G0204331200.01.T01 |                                                                       |
| augustus-2-processed-gene-255.22-mRNA-1 | NA | NA       |               | Os02g0622200 | OsR498G0204339200.01.T03 | Phosphatidylinositol N-acetylglucosaminyltransferase subunit C        |
| augustus-2-processed-gene-259.14-mRNA-1 | NA | Indica   |               | Os02g0630000 | OsR498G0204366500.01.T01 | F-box domain-containing protein (Fragment)                            |
| augustus-2-processed-gene-259.25-mRNA-1 | NA | NA       | Kinase-LRR-TM | Os02g0629400 | OsR498G0204364800.01.T01 | Phytosulfokine receptor 1                                             |
| augustus-2-processed-gene-259.28-mRNA-1 | NA | NA       |               | 0            | OsR498G0204366400.01.T01 | ABC transporter domain-containing protein                             |
| augustus-2-processed-gene-259.5-mRNA-1  | NA | Indica   |               | Os02g0628800 | OsR498G0204362400.01.T02 | Ubiquitin-like protein 5                                              |
| augustus-2-processed-gene-260.21-mRNA-1 | NA | NA       |               | Os02g0631100 | OsR498G0204370100.01.T03 |                                                                       |
| augustus-2-processed-gene-261.22-mRNA-1 | NA | NA       |               |              |                          | Endonuclease                                                          |

|                                         |    |          |               |              |                          |                                                              |
|-----------------------------------------|----|----------|---------------|--------------|--------------------------|--------------------------------------------------------------|
| augustus-2-processed-gene-261.6-mRNA-1  | NA | NA       | Kinase-TM     | Os02g0632800 | OsR498G0204378000.01.T02 | Wall-associated receptor kinase-like protein 9               |
| augustus-2-processed-gene-262.62-mRNA-1 | NA | NA       |               | 0            | OsR498G0204046800.01.T01 | Epstein-Barr virus EBNA-1-like                               |
| augustus-2-processed-gene-268.46-mRNA-1 | NA | NA       |               | Os08g0561800 | OsR498G1120733700.01.T01 | 4-diphosphocytidyl-2C-methyl-D-erythritol synthase           |
| augustus-2-processed-gene-27.49-mRNA-1  | NA | NA       |               | Os02g0147600 | OsR498G0202969600.01.T01 |                                                              |
| augustus-2-processed-gene-271.41-mRNA-1 | NA | NA       |               | 0            | OsR498G0511427100.01.T01 | Epstein-Barr virus EBNA-1-like                               |
| augustus-2-processed-gene-29.29-mRNA-1  | NA | NA       |               | Os02g0151000 | OsR498G0202983100.01.T04 | Pentatricopeptide repeat                                     |
| augustus-2-processed-gene-29.41-mRNA-1  | NA | NA       |               | Os02g0152200 | OsR498G0202986100.01.T03 | DEAD-box ATP-dependent RNA helicase 1                        |
| augustus-2-processed-gene-296.39-mRNA-1 | NA | NA       |               | Os12g0468900 | OsR498G0917373300.01.T01 | Cell wall protein-like                                       |
| augustus-2-processed-gene-310.13-mRNA-1 | NA | NA       |               | Os02g0727700 | OsR498G0204691300.01.T01 | RING-type E3 ubiquitin transferase                           |
| augustus-2-processed-gene-32.0-mRNA-1   | NA | NA       |               | Os09g0445700 | OsR498G1120168800.01.T01 | Universal stress protein family protein                      |
| augustus-2-processed-gene-32.1-mRNA-1   | NA | Japonica |               | Os02g0452800 | OsR498G0409507600.01.T01 | Epimerase domain-containing protein                          |
| augustus-2-processed-gene-322.11-mRNA-1 | NA | NA       |               | 0            | OsR498G0204046800.01.T01 | Circumsporozoite protein-like                                |
| augustus-2-processed-gene-322.15-mRNA-1 | NA | NA       |               | Os06g0683950 | OsR498G0613203000.01.T01 | Armadillo/beta-catenin repeat protein-like                   |
| augustus-2-processed-gene-322.25-mRNA-1 | NA | NA       |               | Os06g0685100 | OsR498G0613204700.01.T01 | COBRA-like protein 7                                         |
| augustus-2-processed-gene-322.32-mRNA-1 | NA | NA       |               | Os06g0683900 | OsR498G0613202700.01.T01 |                                                              |
| augustus-2-processed-gene-323.48-mRNA-1 | NA | NA       |               | Os06g0683400 | OsR498G0613200700.01.T01 | EF-hand Ca2+-binding protein CCD1                            |
| augustus-2-processed-gene-323.73-mRNA-1 | NA | NA       |               | Os06g0114366 | OsR498G0613198100.01.T01 | Selenium-binding protein-like                                |
| augustus-2-processed-gene-325.28-mRNA-1 | NA | NA       |               | 0            | OsR498G0613182600.01.T01 | Peroxisomal membrane protein 11D-like isoform X1             |
| augustus-2-processed-gene-325.52-mRNA-1 | NA | NA       |               | Os06g0678500 | OsR498G0613180100.01.T01 |                                                              |
| augustus-2-processed-gene-326.17-mRNA-1 | NA | NA       |               | Os06g0676700 | OsR498G0613171300.01.T01 | Glycosyl hydrolase family 31 protein                         |
| augustus-2-processed-gene-326.6-mRNA-1  | NA | NA       |               | Os06g0677600 | OsR498G0613174000.01.T02 | Sm domain-containing protein (Fragment)                      |
| augustus-2-processed-gene-327.23-mRNA-1 | NA | NA       |               | Os06g0675700 | OsR498G0613167000.01.T02 | Putative alpha-glucosidase                                   |
| augustus-2-processed-gene-327.30-mRNA-1 | NA | NA       |               | Os06g0675200 | OsR498G0613165600.01.T01 | Zinc finger CCCH domain-containing protein 18-like           |
| augustus-2-processed-gene-328.13-mRNA-1 | NA | NA       |               | Os06g0672400 | OsR498G0613158400.01.T03 | ALOG domain transcriptional regulator family protein 7-6B    |
| augustus-2-processed-gene-330.55-mRNA-1 | NA | NA       |               | 0            | OsR498G0613144800.01.T01 | BTB/POZ and MATH domain-containing protein 2                 |
| augustus-2-processed-gene-330.61-mRNA-1 | NA | NA       |               | Os06g0668400 | OsR498G0613142000.01.T01 | BTB domain-containing protein (Fragment)                     |
| augustus-2-processed-gene-331.10-mRNA-1 | NA | NA       |               | Os01g0235900 | OsR498G0409198000.01.T01 | Glutaredoxin domain-containing protein                       |
| augustus-2-processed-gene-331.17-mRNA-1 | NA | NA       |               | Os11g0205500 | OsR498G1119581200.01.T01 |                                                              |
| augustus-2-processed-gene-331.29-mRNA-1 | NA | NA       |               | Os06g0667100 | OsR498G0613137700.01.T01 | Nuclear transcription factor Y subunit C                     |
| augustus-2-processed-gene-331.30-mRNA-1 | NA | NA       | Kinase-LRR-TM | Os06g0667000 | OsR498G0613137300.01.T01 | Protein kinase domain-containing protein (Fragment)          |
| augustus-2-processed-gene-331.33-mRNA-1 | NA | NA       |               | Os06g0666500 | OsR498G0613134900.01.T01 | RING-H2 finger protein ATLSB                                 |
| augustus-2-processed-gene-331.34-mRNA-1 | NA | NA       |               | Os06g0666400 | OsR498G0613133500.01.T01 | VQ motif-containing protein 22                               |
| augustus-2-processed-gene-333.51-mRNA-1 | NA | NA       |               | Os06g0665100 | OsR498G0613124600.01.T01 | Haloacid dehalogenase/epoxide hydrolase                      |
| augustus-2-processed-gene-334.18-mRNA-1 | NA | NA       |               | Os06g0663300 | OsR498G0613118400.01.T01 | Expansin-like CBD domain-containing protein                  |
| augustus-2-processed-gene-334.32-mRNA-1 | NA | NA       | Kinase-LRR-TM | 0            | OsR498G0613116800.01.T01 | Pollen receptor-like kinase 4                                |
| augustus-2-processed-gene-334.34-mRNA-1 | NA | NA       |               | Os06g0662500 | OsR498G0613116400.01.T01 | Expansin-like CBD domain-containing protein                  |
| augustus-2-processed-gene-334.37-mRNA-1 | NA | NA       |               | Os06g0662800 |                          | Expansin-like CBD domain-containing protein                  |
| augustus-2-processed-gene-334.39-mRNA-1 | NA | NA       |               | Os06g0662600 | OsR498G0613115200.01.T01 | Expansin-like CBD domain-containing protein                  |
| augustus-2-processed-gene-334.41-mRNA-1 | NA | NA       |               | Os06g0662300 | OsR498G0613113600.01.T01 | Expansin-like CBD domain-containing protein                  |
| augustus-2-processed-gene-334.42-mRNA-1 | NA | NA       |               | Os06g0655200 | OsR498G0613113200.01.T01 | Expansin-like CBD domain-containing protein                  |
| augustus-2-processed-gene-335.9-mRNA-1  | NA | NA       |               | Os06g0661600 | OsR498G0613111100.01.T02 | DPH-type MB domain-containing protein (Fragment)             |
| augustus-2-processed-gene-336.0-mRNA-1  | NA | NA       |               | Os06g0659800 | OsR498G0613104200.01.T02 | tRNA(adenine(34)) deaminase                                  |
| augustus-2-processed-gene-341.11-mRNA-1 | NA | NA       |               | Os02g0755400 | OsR498G0204800300.01.T03 | Putative RNA-binding protein ARP1                            |
| augustus-2-processed-gene-341.13-mRNA-1 | NA | NA       |               | Os02g0755200 | OsR498G0204800000.01.T01 | SWIRM domain-containing protein (Fragment)                   |
| augustus-2-processed-gene-341.38-mRNA-1 | NA | NA       |               | Os02g0756200 | OsR498G0204802800.01.T01 | Phosphate-induced protein                                    |
| augustus-2-processed-gene-341.39-mRNA-1 | NA | NA       |               | Os02g0756600 | OsR498G0204803000.01.T01 | Phi-1-like phosphate-induced protein                         |
| augustus-2-processed-gene-341.40-mRNA-1 | NA | NA       |               | Os02g0756800 | OsR498G0204803600.01.T01 | Phi-1-like phosphate-induced protein                         |
| augustus-2-processed-gene-342.13-mRNA-1 | NA | NA       |               | Os06g0658200 |                          |                                                              |
| augustus-2-processed-gene-343.0-mRNA-1  | NA | NA       |               | Os06g0656800 | OsR498G0613093400.01.T01 | Fasciclin-like arabinogalactan protein 8                     |
| augustus-2-processed-gene-343.22-mRNA-1 | NA | NA       |               | Os06g0655500 | OsR498G0613088000.01.T01 | F-box protein AFR                                            |
| augustus-2-processed-gene-343.9-mRNA-1  | NA | NA       |               | Os06g0656300 | OsR498G0613091300.01.T04 |                                                              |
| augustus-2-processed-gene-344.22-mRNA-1 | NA | NA       |               | Os06g0655200 | OsR498G0613087200.01.T01 | Expansin-like CBD domain-containing protein                  |
| augustus-2-processed-gene-344.40-mRNA-1 | NA | NA       |               | Os06g0653800 | OsR498G0613081000.01.T01 | U5 small nuclear ribonucleoprotein 40 kDa protein isoform X1 |
| augustus-2-processed-gene-345.33-mRNA-1 | NA | NA       |               | Os06g0653000 | OsR498G0613079500.01.T01 | Aldehyde oxygenase (deformylating)                           |
| augustus-2-processed-gene-345.51-mRNA-1 | NA | NA       |               | Os06g0652400 | OsR498G0613077300.01.T01 | GDP-L-fucose synthase                                        |
| augustus-2-processed-gene-345.52-mRNA-1 | NA | NA       |               | Os06g0652100 | OsR498G0613076300.01.T01 | Vacuolar protein sorting-associated protein 26A-like         |
| augustus-2-processed-gene-346.53-mRNA-1 | NA | NA       |               | Os06g0649700 | OsR498G0613069100.01.T01 | DOMON domain-containing protein                              |
| augustus-2-processed-gene-348.49-mRNA-1 | NA | NA       |               | Os06g0647200 | OsR498G0613060500.01.T01 | Two-component response regulator like                        |
| augustus-2-processed-gene-348.62-mRNA-1 | NA | NA       |               | Os06g0646100 |                          | DNA ligase (Fragment)                                        |
| augustus-2-processed-gene-349.76-mRNA-1 | NA | NA       |               |              |                          | S-acyltransferase                                            |
| augustus-2-processed-gene-349.77-mRNA-1 | NA | NA       |               | Os06g0644300 |                          | Putative NBS-LRR disease resistance protein                  |

|                                          |    |          |               |              |                          |                                                                               |
|------------------------------------------|----|----------|---------------|--------------|--------------------------|-------------------------------------------------------------------------------|
| augustus-2-processed-gene-35.58-mRNA-1   | NA | NA       |               | Os02g0164900 | OsR498G0203029300.01.T01 | Auxin response factor                                                         |
| augustus-2-processed-gene-35.72-mRNA-1   | NA | NA       |               | Os02g0165000 | OsR498G0203029600.01.T03 | RING-CH-type domain-containing protein (Fragment)                             |
| augustus-2-processed-gene-350.20-mRNA-1  | NA | NA       |               | Os06g0643500 | OsR498G0613047900.01.T01 | 36.4 kDa proline-rich protein isoform X1                                      |
| augustus-2-processed-gene-350.9-mRNA-1   | NA | NA       |               |              |                          | Phox (PX) domain-containing protein                                           |
| augustus-2-processed-gene-351.7-mRNA-1   | NA | NA       |               | Os11g0635500 | OsR498G0613043700.01.T01 | Ent-cassadiene C2-hydroxylase (Fragment)                                      |
| augustus-2-processed-gene-353.11-mRNA-1  | NA | NA       |               | Os02g0754300 | OsR498G0204795900.01.T01 | 50S ribosomal protein L29 chloroplastic                                       |
| augustus-2-processed-gene-353.7-mRNA-1   | NA | NA       |               | Os02g0753400 | OsR498G0204793700.01.T01 | Proteoglycan 4 C-terminal part like                                           |
| augustus-2-processed-gene-354.28-mRNA-1  | NA | NA       |               | Os02g0755200 | OsR498G0204800000.01.T01 | SWIRM domain-containing protein (Fragment)                                    |
| augustus-2-processed-gene-354.46-mRNA-1  | NA | NA       |               | Os02g0756200 | OsR498G0204802800.01.T01 | Phosphate-induced protein                                                     |
| augustus-2-processed-gene-354.47-mRNA-1  | NA | NA       |               | Os02g0756600 | OsR498G0204803000.01.T01 | Phi-1-like phosphate-induced protein                                          |
| augustus-2-processed-gene-354.48-mRNA-1  | NA | NA       |               | Os02g0756800 | OsR498G0204803600.01.T01 | Phi-1-like phosphate-induced protein                                          |
| augustus-2-processed-gene-36.8-mRNA-1    | NA | NA       |               | Os02g0165500 | OsR498G0203033100.01.T01 | Zinc finger CCH domain-containing protein 18-like                             |
| augustus-2-processed-gene-37.57-mRNA-1   | NA | Indica   |               | Os06g0671150 | OsR498G0203043100.01.T03 | Auxin responsive protein-like                                                 |
| augustus-2-processed-gene-37.60-mRNA-1   | NA | Japonica |               | Os02g0168000 | OsR498G0203044100.01.T04 | Urease accessory protein UreF                                                 |
| augustus-2-processed-gene-381.25-mRNA-1  | NA | NA       |               | Os02g0808500 |                          |                                                                               |
| augustus-2-processed-gene-383.42-mRNA-1  | NA | Japonica |               | Os02g0812700 | OsR498G0204994700.01.T01 | Phloem-specific lectin                                                        |
| augustus-2-processed-gene-385.69-mRNA-1  | NA | NA       |               | Os02g0815600 | OsR498G0205002600.01.T01 | 2-(3-amino-3-carboxypropyl)histidine synthase subunit 1                       |
| augustus-2-processed-gene-390.40-mRNA-1  | NA | Japonica |               | Os02g0825700 | OsR498G0205034700.01.T03 | F-box domain-containing protein                                               |
| augustus-2-processed-gene-390.41-mRNA-1  | NA | Indica   |               | Os02g0825100 | OsR498G0205034700.01.T02 | F-box domain-containing protein                                               |
| augustus-2-processed-gene-392.5-mRNA-1   | NA | NA       |               | Os09g0562400 | OsR498G0101823900.01.T01 | Transposon protein, putative, Mutator sub-class, expressed                    |
| augustus-2-processed-gene-393.161-mRNA-1 | NA | NA       |               | Os02g0815600 | OsR498G0205002600.01.T01 | 2-(3-amino-3-carboxypropyl)histidine synthase subunit 1                       |
| augustus-2-processed-gene-44.48-mRNA-1   | NA | Japonica |               | Os02g0179600 | OsR498G0613076300.01.T01 |                                                                               |
| augustus-2-processed-gene-5.24-mRNA-1    | NA | Japonica |               | Os02g0108900 | OsR498G0202827500.01.T01 | SEC63 domain-containing protein                                               |
| augustus-2-processed-gene-55.14-mRNA-1   | NA | Indica   |               | Os06g0609700 | OsR498G0203157500.01.T04 | Alpha/beta-Hydrolases superfamily protein                                     |
| augustus-2-processed-gene-55.24-mRNA-1   | NA | NA       |               | 0            | OsR498G0203156600.01.T01 | Chlorophyll a-b binding protein, chloroplastic                                |
| augustus-2-processed-gene-56.51-mRNA-1   | NA | NA       | CC-NBS-TM     | 0            | OsR498G0203162900.01.T01 | NB-ARC domain-containing protein                                              |
| augustus-2-processed-gene-56.64-mRNA-1   | NA | NA       |               | Os02g0198900 | OsR498G0203161400.01.T02 | Ribosomal protein L12/ ATP-dependent Clp protease adaptor protein ClpS family |
| augustus-2-processed-gene-56.66-mRNA-1   | NA | NA       |               | Os02g0199600 |                          | F-box domain-containing protein                                               |
| augustus-2-processed-gene-64.16-mRNA-1   | NA | NA       |               |              |                          |                                                                               |
| augustus-2-processed-gene-66.4-mRNA-1    | NA | NA       |               | Os02g0216300 |                          |                                                                               |
| augustus-2-processed-gene-68.41-mRNA-1   | NA | NA       |               | Os02g0204100 |                          | Tetratricopeptide repeat (TPR)-like superfamily protein                       |
| augustus-2-processed-gene-72.60-mRNA-1   | NA | Japonica |               | Os02g0226801 | OsR498G0612770700.01.T01 | Abscisic acid receptor 2                                                      |
| augustus-2-processed-gene-74.10-mRNA-1   | NA | NA       |               | Os02g0229400 | OsR498G0203272500.01.T04 | Monosaccharide-sensing protein 2                                              |
| augustus-2-processed-gene-9.69-mRNA-1    | NA | NA       | Kinase-LRR-TM | Os02g0116700 | OsR498G0202850700.01.T01 | Phytosulfokine receptor 1                                                     |
| augustus-2-processed-gene-9.97-mRNA-1    | NA | NA       |               | Os02g0118000 | OsR498G0202853400.01.T01 | Pentatricopeptide repeat                                                      |
| augustus-2-processed-gene-93.20-mRNA-1   | NA | NA       |               | Os02g0263432 |                          | NB-ARC domain-containing protein (Fragment)                                   |
| augustus-2-processed-gene-94.27-mRNA-1   | NA | NA       |               | 0            | OsR498G0511427100.01.T01 | Epstein-Barr virus EBNA-1-like                                                |
| augustus-2-processed-gene-98.19-mRNA-1   | NA | Indica   |               | Os02g0270933 | OsR498G0203388600.01.T02 | Subtilisin-like protease                                                      |
| augustus-3-processed-gene-0.50-mRNA-1    | NA | NA       |               | 0            | OsR498G1017992100.01.T01 |                                                                               |
| augustus-3-processed-gene-116.15-mRNA-1  | NA | NA       |               | Os12g0468900 | OsR498G0101221100.01.T01 | Transposon protein, putative, CACTA, En/Spm sub-class                         |
| augustus-3-processed-gene-124.4-mRNA-1   | NA | NA       |               | 0            | OsR498G1019212800.01.T02 | Putative BOI-related E3 ubiquitin-protein ligase 3                            |
| augustus-3-processed-gene-159.53-mRNA-1  | NA | NA       |               | Os03g0110200 |                          | Transposon protein, putative, Mutator sub-class, expressed                    |
| augustus-3-processed-gene-174.4-mRNA-1   | NA | NA       |               |              |                          | Transposon protein, putative, CACTA, En/Spm sub-class                         |
| augustus-3-processed-gene-206.24-mRNA-1  | NA | NA       |               |              |                          | DDE Tnp4 domain-containing protein                                            |
| augustus-3-processed-gene-208.12-mRNA-1  | NA | NA       |               | Os03g0412400 | OsR498G0306191200.01.T01 |                                                                               |
| augustus-3-processed-gene-232.3-mRNA-1   | NA | NA       |               | 0            | OsR498G0510213600.01.T01 |                                                                               |
| augustus-3-processed-gene-252.11-mRNA-1  | NA | NA       |               | 0            | OsR498G0306512000.01.T01 | Transposable element protein, putative, MuDR                                  |
| augustus-3-processed-gene-255.50-mRNA-1  | NA | NA       |               | Os03g0607200 | OsR498G0306531800.01.T01 | Gibberellin-regulated protein 1                                               |
| augustus-3-processed-gene-263.62-mRNA-1  | NA | NA       |               |              |                          | ATP-dependent DNA helicase                                                    |
| augustus-3-processed-gene-281.57-mRNA-1  | NA | NA       |               | 0            | OsR498G1018661500.01.T01 |                                                                               |
| augustus-3-processed-gene-287.42-mRNA-1  | NA | NA       |               | 0            | OsR498G1018629100.01.T01 |                                                                               |
| augustus-3-processed-gene-303.4-mRNA-1   | NA | NA       |               | 0            | OsR498G0204301500.01.T06 | ATP-dependent DNA helicase                                                    |
| augustus-3-processed-gene-322.36-mRNA-1  | NA | NA       |               | Os12g0468900 | OsR498G0407549800.01.T01 | Cell wall protein-like                                                        |
| augustus-3-processed-gene-328.20-mRNA-1  | NA | NA       |               | Os08g0381000 | OsR498G0916869000.01.T01 | Cell wall protein-like                                                        |
| augustus-3-processed-gene-337.17-mRNA-1  | NA | NA       |               | 0            | OsR498G0511427100.01.T01 | Epstein-Barr virus EBNA-1-like                                                |
| augustus-3-processed-gene-355.19-mRNA-1  | NA | NA       |               |              |                          | Zinc knuckle containing protein-like                                          |
| augustus-3-processed-gene-361.32-mRNA-1  | NA | NA       |               | 0            | OsR498G0306512000.01.T01 | Transposable element protein, putative, MuDR                                  |
| augustus-3-processed-gene-365.14-mRNA-1  | NA | NA       |               | Os03g0607200 | OsR498G0306531800.01.T01 | Gibberellin-regulated protein 1                                               |
| augustus-3-processed-gene-373.13-mRNA-1  | NA | NA       |               | Os03g0622200 | OsR498G0306579100.01.T01 | Putative B3 domain-containing protein (Fragment)                              |
| augustus-3-processed-gene-378.29-mRNA-1  | NA | NA       |               |              |                          | Transposon protein, putative, CACTA, En/Spm sub-class, expressed              |
| augustus-3-processed-gene-392.3-mRNA-1   | NA | NA       |               |              |                          | Transposable element protein, putative, MuDR                                  |

|                                          |    |          |           |              |                          |                                                                      |
|------------------------------------------|----|----------|-----------|--------------|--------------------------|----------------------------------------------------------------------|
| augustus-3-processed-gene-394.35-mRNA-1  | NA | NA       |           |              |                          | Transposon protein, putative, CACTA, En/Spm sub-class                |
| augustus-3-processed-gene-398.25-mRNA-1  | NA | NA       |           | 0            | OsR498G1221232800.01.T01 | Hydroxyproline-rich glycoprotein-like                                |
| augustus-3-processed-gene-401.41-mRNA-1  | NA | Indica   |           | Os03g0669100 | OsR498G0306761200.01.T01 | Deoxyuridine 5'-triphosphate nucleotidohydrolase                     |
| augustus-3-processed-gene-406.41-mRNA-1  | NA | NA       |           |              |                          | Vacuolar protein sorting-associated protein 26                       |
| augustus-3-processed-gene-419.75-mRNA-1  | NA | NA       |           |              |                          | Transposon protein, putative, Mutator sub-class                      |
| augustus-3-processed-gene-489.36-mRNA-1  | NA | NA       |           | Os03g0835600 | OsR498G0307331000.01.T01 | Acyl-CoA-binding domain-containing protein 4-like protein isoform X2 |
| augustus-3-processed-gene-490.28-mRNA-1  | NA | NA       |           | Os03g0110200 |                          | MuDR family transposase domain containing protein                    |
| augustus-3-processed-gene-493.104-mRNA-1 | NA | Indica   |           | Os03g0845300 | OsR498G0307358600.01.T01 | Nuclear RNA binding protein A                                        |
| augustus-3-processed-gene-80.65-mRNA-1   | NA | NA       |           | Os03g0255500 | OsR498G0305600800.01.T07 | Phosphoenolpyruvate carboxykinase (ATP)                              |
| augustus-4-processed-gene-110.4-mRNA-1   | NA | NA       |           |              |                          |                                                                      |
| augustus-4-processed-gene-112.22-mRNA-1  | NA | NA       |           | Os04g0351333 | OsR498G0408232300.01.T02 |                                                                      |
| augustus-4-processed-gene-116.13-mRNA-1  | NA | Indica   |           | Os10g0192300 | OsR498G0408255600.01.T02 | ATP-dependent DNA helicase                                           |
| augustus-4-processed-gene-117.0-mRNA-1   | NA | NA       |           | Os10g0460000 | OsR498G1019116500.01.T01 |                                                                      |
| augustus-4-processed-gene-117.2-mRNA-1   | NA | NA       |           | Os04g0359100 | OsR498G0408266700.01.T01 | Putative quinone-oxidoreductase homolog chloroplastic                |
| augustus-4-processed-gene-118.13-mRNA-1  | NA | Indica   |           | Os04g0361500 | OsR498G0408287300.01.T01 | L-gulonolactone oxidase                                              |
| augustus-4-processed-gene-121.14-mRNA-1  | NA | NA       | Kinase-TM | 0            | OsR498G0408317100.01.T03 | Wall-associated receptor kinase 3                                    |
| augustus-4-processed-gene-125.17-mRNA-1  | NA | NA       |           | Os04g0370600 | OsR498G0408346900.01.T02 | F-box/LRR-repeat protein 14                                          |
| augustus-4-processed-gene-128.22-mRNA-1  | NA | NA       |           | Os04g0373000 | OsR498G0408359900.01.T01 | Probable magnesium transporter                                       |
| augustus-4-processed-gene-129.53-mRNA-1  | NA | NA       | NBS-TM    | Os04g0375300 | OsR498G0408366900.01.T01 | NB-ARC domain-containing protein                                     |
| augustus-4-processed-gene-130.56-mRNA-1  | NA | NA       | NBS-TM    | 0            | OsR498G0408382700.01.T01 | Disease resistance protein RGA2                                      |
| augustus-4-processed-gene-131.33-mRNA-1  | NA | NA       |           | Os02g0212975 | OsR498G0305421900.01.T01 |                                                                      |
| augustus-4-processed-gene-131.45-mRNA-1  | NA | NA       |           | 0            | OsR498G0408385100.01.T05 |                                                                      |
| augustus-4-processed-gene-132.27-mRNA-1  | NA | NA       |           | 0            | OsR498G0102118900.01.T01 | AB hydrolase-1 domain-containing protein                             |
| augustus-4-processed-gene-133.3-mRNA-1   | NA | NA       |           | Os04g0382200 | OsR498G0408400900.01.T01 | Exocyst subunit Exo70 family protein (Fragment)                      |
| augustus-4-processed-gene-134.17-mRNA-1  | NA | NA       |           | Os04g0384100 |                          |                                                                      |
| augustus-4-processed-gene-134.19-mRNA-1  | NA | NA       |           | Os04g0384850 | OsR498G0408408700.01.T01 |                                                                      |
| augustus-4-processed-gene-135.5-mRNA-1   | NA | NA       |           | 0            | OsR498G0408420700.01.T01 | Large proline-rich protein                                           |
| augustus-4-processed-gene-136.16-mRNA-1  | NA | NA       |           | Os04g0380500 |                          |                                                                      |
| augustus-4-processed-gene-137.0-mRNA-1   | NA | NA       |           | Os04g0388500 | OsR498G0408428100.01.T01 | Calmodulin-binding transcription activator 4                         |
| augustus-4-processed-gene-137.11-mRNA-1  | NA | NA       |           | Os04g0389800 | OsR498G0408432100.01.T01 | Acetolactate synthase                                                |
| augustus-4-processed-gene-137.2-mRNA-1   | NA | Indica   |           | Os04g0388800 | OsR498G0408429700.01.T01 | J domain-containing protein (Fragment)                               |
| augustus-4-processed-gene-146.12-mRNA-1  | NA | NA       | LRR-TM    | 0            | OsR498G0408499300.01.T01 | Protein kinase domain containing protein, expressed                  |
| augustus-4-processed-gene-147.53-mRNA-1  | NA | NA       |           | Os04g0405700 | OsR498G0408505100.01.T01 |                                                                      |
| augustus-4-processed-gene-148.59-mRNA-1  | NA | NA       |           | Os04g0409500 | OsR498G0408518400.01.T04 | Metallophos domain-containing protein                                |
| augustus-4-processed-gene-149.48-mRNA-1  | NA | NA       |           | Os08g0561800 | OsR498G0408675500.01.T01 | 4-diphosphocytidyl-2C-methyl-D-erythritol synthase                   |
| augustus-4-processed-gene-149.49-mRNA-1  | NA | NA       |           | Os04g0411800 | OsR498G0408524100.01.T01 | AB hydrolase-1 domain-containing protein                             |
| augustus-4-processed-gene-149.70-mRNA-1  | NA | NA       |           | Os04g0411400 | OsR498G0408522400.01.T01 | Centroradialis                                                       |
| augustus-4-processed-gene-150.15-mRNA-1  | NA | NA       |           | Os04g0412700 | OsR498G0408527900.01.T01 | Carbonic anhydrase                                                   |
| augustus-4-processed-gene-150.16-mRNA-1  | NA | NA       |           | Os04g0412800 | OsR498G0408528100.01.T01 | Glutaredoxin domain-containing protein (Fragment)                    |
| augustus-4-processed-gene-150.2-mRNA-1   | NA | NA       |           | 0            | OsR498G0408525900.01.T03 | Ferredoxin                                                           |
| augustus-4-processed-gene-150.3-mRNA-1   | NA | NA       |           | Os04g0412200 | OsR498G0408525900.01.T04 | Ferredoxin                                                           |
| augustus-4-processed-gene-151.14-mRNA-1  | NA | NA       |           | Os04g0415200 | OsR498G0408540100.01.T01 |                                                                      |
| augustus-4-processed-gene-151.15-mRNA-1  | NA | Indica   |           | Os01g0660000 | OsR498G0408540300.01.T01 |                                                                      |
| augustus-4-processed-gene-151.16-mRNA-1  | NA | NA       |           | Os04g0415600 | OsR498G0408541500.01.T01 | Copper transporter                                                   |
| augustus-4-processed-gene-152.18-mRNA-1  | NA | Indica   |           | Os02g0539100 | OsR498G0408545900.01.T05 | Digalactosyldiacylglycerol synthase 1 chloroplastic                  |
| augustus-4-processed-gene-153.23-mRNA-1  | NA | NA       |           | Os04g0419100 |                          |                                                                      |
| augustus-4-processed-gene-155.21-mRNA-1  | NA | NA       |           | Os04g0423200 | OsR498G0408568300.01.T01 |                                                                      |
| augustus-4-processed-gene-158.17-mRNA-1  | NA | NA       |           | Os04g0428300 |                          |                                                                      |
| augustus-4-processed-gene-164.16-mRNA-1  | NA | NA       |           | Os04g0437500 |                          |                                                                      |
| augustus-4-processed-gene-164.26-mRNA-1  | NA | Indica   |           | Os04g0438400 | OsR498G0408617100.01.T01 | Pectinesterase                                                       |
| augustus-4-processed-gene-167.23-mRNA-1  | NA | NA       |           | 0            | OsR498G0408641700.01.T01 | RING-H2 finger protein ATL52                                         |
| augustus-4-processed-gene-17.30-mRNA-1   | NA | NA       |           | Os04g0194400 | OsR498G0407698300.01.T01 | Acyl transferase 15                                                  |
| augustus-4-processed-gene-172.15-mRNA-1  | NA | NA       |           | Os04g0451700 |                          |                                                                      |
| augustus-4-processed-gene-174.47-mRNA-1  | NA | NA       |           | 0            | OsR498G0204046800.01.T01 | Epstein-Barr virus EBNA-1-like                                       |
| augustus-4-processed-gene-176.68-mRNA-1  | NA | NA       |           | 0            | OsR498G0408697900.01.T01 |                                                                      |
| augustus-4-processed-gene-176.71-mRNA-1  | NA | NA       |           | 0            | OsR498G0408699900.01.T01 |                                                                      |
| augustus-4-processed-gene-178.31-mRNA-1  | NA | NA       |           | 0            | OsR498G0408710300.01.T01 |                                                                      |
| augustus-4-processed-gene-178.49-mRNA-1  | NA | NA       |           | Os04g0464100 | OsR498G0408714300.01.T02 | HMA domain-containing protein                                        |
| augustus-4-processed-gene-180.38-mRNA-1  | NA | NA       |           | Os04g0467000 | OsR498G0408727300.01.T01 |                                                                      |
| augustus-4-processed-gene-182.0-mRNA-1   | NA | Japonica | CC-NBS-TM | Os04g0470500 | OsR498G0408741100.01.T01 | Disease resistance protein RPS2                                      |
| augustus-4-processed-gene-189.13-mRNA-1  | NA | NA       |           | Os04g0486300 | OsR498G0408792300.01.T01 | Ribose-5-phosphate isomerase (Fragment)                              |

|                                         |    |          |               |              |                          |                                                                         |
|-----------------------------------------|----|----------|---------------|--------------|--------------------------|-------------------------------------------------------------------------|
| augustus-4-processed-gene-190.60-mRNA-1 | NA | NA       | Kinase-LRR-TM | Os04g0487200 | OsR498G0408795300.01.T01 | Inactive LRR receptor-like serine/threonine-protein kinase              |
| augustus-4-processed-gene-190.61-mRNA-1 | NA | NA       |               |              |                          | C3H1-type domain-containing protein                                     |
| augustus-4-processed-gene-190.66-mRNA-1 | NA | Japonica |               | Os04g0488200 | OsR498G0408799700.01.T02 | pentatricopeptide repeat-containing protein EL11, chloroplastic         |
| augustus-4-processed-gene-201.2-mRNA-1  | NA | NA       |               | 0            | OsR498G0408868500.01.T01 |                                                                         |
| augustus-4-processed-gene-202.0-mRNA-1  | NA | Japonica |               | Os04g0509600 | OsR498G0204334900.01.T01 | Ammonium transporter                                                    |
| augustus-4-processed-gene-203.47-mRNA-1 | NA | NA       |               | 0            | OsR498G0101475600.01.T01 | Phosphoribosyl-AMP cyclohydrolase                                       |
| augustus-4-processed-gene-203.53-mRNA-1 | NA | NA       |               | 0            | OsR498G0100075100.01.T01 | Epstein-Barr virus EBNA-1-like                                          |
| augustus-4-processed-gene-204.66-mRNA-1 | NA | NA       |               | Os03g0110200 |                          | Transposon protein, putative, Mutator sub-class, expressed              |
| augustus-4-processed-gene-205.35-mRNA-1 | NA | NA       |               | Os04g0516900 |                          |                                                                         |
| augustus-4-processed-gene-205.40-mRNA-1 | NA | NA       |               | 0            | OsR498G0408902900.01.T01 |                                                                         |
| augustus-4-processed-gene-206.27-mRNA-1 | NA | NA       |               | Os04g0517900 | OsR498G0408903500.01.T01 | Auxin-responsive protein SAUR50                                         |
| augustus-4-processed-gene-207.17-mRNA-1 | NA | NA       |               | Os04g0520900 | OsR498G0408917300.01.T06 | Pentatricopeptide repeat-containing protein mitochondrial-like          |
| augustus-4-processed-gene-208.2-mRNA-1  | NA | NA       |               | Os12g0166700 | OsR498G1120733700.01.T01 | Retrotransposon protein, putative, Ty3-gypsy sub-class                  |
| augustus-4-processed-gene-210.23-mRNA-1 | NA | NA       |               | Os04g0528200 | OsR498G0408940300.01.T01 |                                                                         |
| augustus-4-processed-gene-211.32-mRNA-1 | NA | Indica   |               | Os02g0638900 | OsR498G0408948900.01.T01 | WD repeat-containing protein 44-like                                    |
| augustus-4-processed-gene-212.51-mRNA-1 | NA | NA       |               | Os04g0529700 | OsR498G0408950500.01.T01 | Lanthionine synthetase C-like protein 1                                 |
| augustus-4-processed-gene-212.65-mRNA-1 | NA | NA       | Kinase-TM     | Os04g0531500 | OsR498G0408956500.01.T01 | Lectin receptor-type kinase                                             |
| augustus-4-processed-gene-212.67-mRNA-1 | NA | NA       |               | Os04g0531800 | OsR498G0408957100.01.T05 |                                                                         |
| augustus-4-processed-gene-213.17-mRNA-1 | NA | Indica   |               | Os02g0641900 | OsR498G0408961700.01.T01 | Transcription factor MYB74                                              |
| augustus-4-processed-gene-213.2-mRNA-1  | NA | NA       |               | Os04g0532200 |                          |                                                                         |
| augustus-4-processed-gene-214.44-mRNA-1 | NA | NA       |               | 0            | OsR498G0408966100.01.T05 | Retrotransposon protein, putative, unclassified                         |
| augustus-4-processed-gene-214.46-mRNA-1 | NA | NA       |               | Os04g0535600 | OsR498G0408968100.01.T02 | Beta-fructofuranosidase 1                                               |
| augustus-4-processed-gene-215.16-mRNA-1 | NA | Japonica |               | Os04g0537100 | OsR498G0408974700.01.T01 | SAUR11-auxin-responsive SAUR family member                              |
| augustus-4-processed-gene-215.22-mRNA-1 | NA | NA       |               | Os04g0537800 | OsR498G0408981700.01.T01 | Cysteine-rich repeat secretory protein 15                               |
| augustus-4-processed-gene-215.42-mRNA-1 | NA | NA       |               | 0            | OsR498G0408981200.01.T01 |                                                                         |
| augustus-4-processed-gene-218.28-mRNA-1 | NA | NA       |               | Os04g0541500 | OsR498G0409002300.01.T01 | Sphingoid long-chain bases kinase 1                                     |
| augustus-4-processed-gene-223.8-mRNA-1  | NA | NA       |               | Os04g0551800 | OsR498G0409039700.01.T01 | CCT-alpha                                                               |
| augustus-4-processed-gene-226.33-mRNA-1 | NA | NA       |               |              |                          | R-type basic helix-loop-helix protein                                   |
| augustus-4-processed-gene-226.38-mRNA-1 | NA | NA       |               | Os04g0558900 | OsR498G0409063100.01.T01 | Subtilisin-like serine protease                                         |
| augustus-4-processed-gene-228.10-mRNA-1 | NA | Japonica |               | Os04g0562500 | OsR498G0204490700.01.T01 |                                                                         |
| augustus-4-processed-gene-23.14-mRNA-1  | NA | NA       |               | 0            | OsR498G0407733300.01.T01 |                                                                         |
| augustus-4-processed-gene-230.3-mRNA-1  | NA | Japonica |               | Os04g0565200 | OsR498G0409082100.01.T01 | Glycosyltransferase                                                     |
| augustus-4-processed-gene-244.32-mRNA-1 | NA | NA       |               |              |                          | Poly(A) polymerase                                                      |
| augustus-4-processed-gene-245.11-mRNA-1 | NA | Japonica |               | Os04g0590366 | OsR498G0203601400.01.T01 | Ribose-5-phosphate isomerase                                            |
| augustus-4-processed-gene-25.32-mRNA-1  | NA | NA       |               | 0            | OsR498G0407745300.01.T01 |                                                                         |
| augustus-4-processed-gene-251.2-mRNA-1  | NA | NA       |               | 0            | OsR498G0306953900.01.T01 |                                                                         |
| augustus-4-processed-gene-261.33-mRNA-1 | NA | NA       |               | Os04g0619900 | OsR498G0409294900.01.T01 | BAG family molecular chaperone regulator like                           |
| augustus-4-processed-gene-262.14-mRNA-1 | NA | Japonica | CC-NBS-TM     | Os04g0621750 | OsR498G0409301900.01.T01 | Disease resistance protein RGA2                                         |
| augustus-4-processed-gene-262.16-mRNA-1 | NA | Japonica |               | Os04g0621900 | OsR498G0409303900.01.T01 | BED-type domain-containing protein (Fragment)                           |
| augustus-4-processed-gene-268.79-mRNA-1 | NA | Japonica | Kinase-TM     | Os04g0633800 | OsR498G0409334600.01.T02 | Non-specific serine/threonine protein kinase                            |
| augustus-4-processed-gene-270.13-mRNA-1 | NA | NA       |               | Os04g0638800 | OsR498G0409350100.01.T01 | DUF617 domain-containing protein                                        |
| augustus-4-processed-gene-277.68-mRNA-1 | NA | Indica   |               | Os09g0566000 | OsR498G0409397100.01.T01 | Arogenate dehydratase                                                   |
| augustus-4-processed-gene-280.30-mRNA-1 | NA | NA       |               | Os04g0656100 | OsR498G0409413100.01.T01 | Plasma membrane ATPase                                                  |
| augustus-4-processed-gene-286.65-mRNA-1 | NA | NA       |               | Os04g0668600 | OsR498G0409458500.01.T01 | F-box/kelch-repeat protein At5g15710                                    |
| augustus-4-processed-gene-301.62-mRNA-1 | NA | Japonica |               | Os04g0554600 | OsR498G0409049300.01.T01 | Proline-rich protein DC2.15                                             |
| augustus-4-processed-gene-34.10-mRNA-1  | NA | NA       |               | Os07g0693100 | OsR498G1018918700.01.T01 | Pyruvate decarboxylase                                                  |
| augustus-4-processed-gene-39.6-mRNA-1   | NA | NA       |               | Os07g0562400 | OsR498G0714577900.01.T01 | MFS domain-containing protein                                           |
| augustus-4-processed-gene-41.43-mRNA-1  | NA | NA       |               |              |                          | Formin-like protein 12                                                  |
| augustus-4-processed-gene-43.12-mRNA-1  | NA | NA       |               | 0            | OsR498G0408682100.01.T01 | XS domain containing protein-like                                       |
| augustus-4-processed-gene-43.16-mRNA-1  | NA | NA       |               | Os04g0194400 | OsR498G0407698300.01.T01 | Acyl transferase 15                                                     |
| augustus-4-processed-gene-52.15-mRNA-1  | NA | Japonica |               | Os04g0261400 | OsR498G0203686900.01.T01 | Putative transcription factor/ chromatin remodeling BED-type(Zn) family |
| augustus-4-processed-gene-53.6-mRNA-1   | NA | NA       |               | 0            | OsR498G0407877100.01.T01 | Retrotransposon protein, putative, Ty1-copia subclass, expressed        |
| augustus-4-processed-gene-55.13-mRNA-1  | NA | NA       |               | 0            | OsR498G0407890600.01.T01 | Adenosylhomocysteinase                                                  |
| augustus-4-processed-gene-56.9-mRNA-1   | NA | NA       |               | Os04g0268700 | OsR498G0407894900.01.T01 | glycine-rich cell wall structural protein isoform X1                    |
| augustus-4-processed-gene-60.1-mRNA-1   | NA | NA       |               | 0            | OsR498G0613009300.01.T01 |                                                                         |
| augustus-4-processed-gene-65.1-mRNA-1   | NA | NA       |               | Os04g0283800 |                          | GRAM domain-containing protein                                          |
| augustus-4-processed-gene-66.18-mRNA-1  | NA | NA       |               | Os04g0286500 | OsR498G0916692600.01.T01 | Transposon protein, putative, Pong sub-class, expressed                 |
| augustus-4-processed-gene-76.18-mRNA-1  | NA | NA       |               | Os04g0300175 |                          | ATP-dependent DNA helicase                                              |
| augustus-4-processed-gene-84.19-mRNA-1  | NA | Japonica | CC-NBS-TM     | Os04g0312000 | OsR498G0612066600.01.T01 | Protein kinase domain-containing protein                                |
| augustus-4-processed-gene-85.12-mRNA-1  | NA | NA       |               | 0            | OsR498G0408109200.01.T01 | SRF-type transcription factor family protein                            |
| augustus-4-processed-gene-86.0-mRNA-1   | NA | NA       |               | Os04g0319800 | OsR498G0408075100.01.T01 | Glycosyltransferase                                                     |



|                                         |    |          |           |              |                          |                                                                        |
|-----------------------------------------|----|----------|-----------|--------------|--------------------------|------------------------------------------------------------------------|
| augustus-4-processed-gene-86.1-mRNA-1   | NA | NA       |           | Os04g0319800 | OsR498G0408075100.01.T01 | Glycosyltransferase                                                    |
| augustus-4-processed-gene-86.8-mRNA-1   | NA | NA       |           |              |                          | Sister chromatid cohesion protein PDS5 B-B                             |
| augustus-4-processed-gene-88.17-mRNA-1  | NA | NA       |           | Os04g0316800 | OsR498G0408050900.01.T01 | DUF295 domain-containing protein (Fragment)                            |
| augustus-4-processed-gene-91.4-mRNA-1   | NA | NA       |           | Os04g0319700 | OsR498G0408073100.01.T01 | Glycosyltransferase                                                    |
| augustus-4-processed-gene-91.9-mRNA-1   | NA | NA       |           | Os04g0319800 | OsR498G0408075100.01.T01 | Glycosyltransferase                                                    |
| augustus-4-processed-gene-92.31-mRNA-1  | NA | NA       |           |              |                          | RpmA                                                                   |
| augustus-4-processed-gene-92.34-mRNA-1  | NA | NA       |           | 0            | OsR498G0408153000.01.T01 | Splicing coactivator subunit-like                                      |
| augustus-4-processed-gene-94.0-mRNA-1   | NA | NA       |           | Os04g0324100 | OsR498G0408099900.01.T01 | Glycosyltransferase                                                    |
| augustus-4-processed-gene-95.6-mRNA-1   | NA | NA       |           | 0            | OsR498G0408211200.01.T01 | Translation initiation factor                                          |
| augustus-4-processed-gene-96.1-mRNA-1   | NA | NA       |           | 0            | OsR498G0408211200.01.T01 | Translation initiation factor                                          |
| augustus-4-processed-gene-96.17-mRNA-1  | NA | NA       |           |              |                          | BUB1 N-terminal domain-containing protein                              |
| augustus-4-processed-gene-99.1-mRNA-1   | NA | NA       |           | Os04g0329200 | OsR498G0408137500.01.T01 | Expansin-like CBD domain-containing protein                            |
| augustus-4-processed-gene-99.2-mRNA-1   | NA | NA       |           | Os04g0329300 | OsR498G0408139100.01.T01 | Expansin-like CBD domain-containing protein                            |
| augustus-5-processed-gene-1.24-mRNA-1   | NA | NA       |           | Os05g0102000 | OsR498G0509559600.01.T01 | probable S-adenosylmethionine-dependent methyltransferase At5g38100 is |
| augustus-5-processed-gene-104.26-mRNA-1 | NA | NA       |           | Os08g0381000 | OsR498G0916869000.01.T01 | Hydroxyproline-rich glycoprotein-like                                  |
| augustus-5-processed-gene-104.9-mRNA-1  | NA | NA       |           | 0            | OsR498G0306476200.01.T01 | Retrotransposon protein, putative, LINE subclass, expressed            |
| augustus-5-processed-gene-111.19-mRNA-1 | NA | NA       |           | 0            | OsR498G0408153000.01.T01 | Splicing coactivator subunit-like                                      |
| augustus-5-processed-gene-113.6-mRNA-1  | NA | NA       |           | Os05g0275000 | OsR498G0510247800.01.T05 | Pentatricopeptide repeat-containing protein, chloroplastic             |
| augustus-5-processed-gene-117.15-mRNA-1 | NA | NA       |           |              |                          | Transposable element protein, putative                                 |
| augustus-5-processed-gene-118.14-mRNA-1 | NA | NA       | Kinase-TM | Os05g0280700 | OsR498G0510277400.01.T01 | Receptor-like protein kinase ANXUR1                                    |
| augustus-5-processed-gene-120.11-mRNA-1 | NA | NA       |           | 0            | OsR498G0510286200.01.T01 |                                                                        |
| augustus-5-processed-gene-126.6-mRNA-1  | NA | Japonica |           | Os05g0317300 | OsR498G0714239700.01.T01 | FAR1 domain-containing protein                                         |
| augustus-5-processed-gene-133.17-mRNA-1 | NA | NA       |           |              |                          |                                                                        |
| augustus-5-processed-gene-133.4-mRNA-1  | NA | NA       |           | 0            | OsR498G1119914600.01.T01 | Retrotransposon protein, putative, unclassified, expressed             |
| augustus-5-processed-gene-134.38-mRNA-1 | NA | NA       |           |              |                          | Retrotransposon gag protein, putative                                  |
| augustus-5-processed-gene-135.24-mRNA-1 | NA | NA       |           | Os05g0296900 |                          |                                                                        |
| augustus-5-processed-gene-135.28-mRNA-1 | NA | Indica   |           | Os09g0103700 | OsR498G0510369800.01.T01 | CAX-interacting protein 4                                              |
| augustus-5-processed-gene-136.18-mRNA-1 | NA | Indica   |           | Os05g0298500 | OsR498G0510373800.01.T02 | Histone transcription regulator 3 homolog                              |
| augustus-5-processed-gene-136.31-mRNA-1 | NA | NA       |           | 0            | OsR498G0100686200.01.T01 | Zinc knuckle domain-like                                               |
| augustus-5-processed-gene-137.17-mRNA-1 | NA | NA       |           | Os05g0299600 | OsR498G0510378400.01.T04 |                                                                        |
| augustus-5-processed-gene-137.23-mRNA-1 | NA | NA       |           | Os05g0299700 | OsR498G0510380400.01.T04 | Stress-associated protein 1                                            |
| augustus-5-processed-gene-137.26-mRNA-1 | NA | NA       |           | Os05g0301200 |                          | HAT dimerization domain-containing protein                             |
| augustus-5-processed-gene-141.37-mRNA-1 | NA | NA       |           | Os05g0305300 | OsR498G0510413000.01.T01 | Pentatricopeptide repeat                                               |
| augustus-5-processed-gene-151.23-mRNA-1 | NA | NA       |           | Os05g0317200 | OsR498G0510474100.01.T03 | Long-chain-fatty-acid--CoA ligase 3                                    |
| augustus-5-processed-gene-151.34-mRNA-1 | NA | Japonica |           | Os05g0317300 | OsR498G0714239700.01.T01 | FAR1 domain-containing protein                                         |
| augustus-5-processed-gene-154.16-mRNA-1 | NA | NA       |           | Os05g0323100 | OsR498G0510492300.01.T01 | Rhodanese-like domain-containing protein 7                             |
| augustus-5-processed-gene-155.22-mRNA-1 | NA | NA       |           | Os05g0324600 | OsR498G0510499000.01.T01 | Transcription repressor                                                |
| augustus-5-processed-gene-155.44-mRNA-1 | NA | NA       |           | Os03g0110200 | OsR498G0101158000.01.T01 | Transposon protein, putative, Mutator sub-class, expressed             |
| augustus-5-processed-gene-160.10-mRNA-1 | NA | NA       |           | Os05g0329400 | OsR498G0510521900.01.T01 | Putative prolamin 7                                                    |
| augustus-5-processed-gene-172.32-mRNA-1 | NA | NA       |           | 0            | OsR498G0510594200.01.T01 | RNase H domain-containing protein (Fragment)                           |
| augustus-5-processed-gene-173.15-mRNA-1 | NA | NA       |           | Os05g0351200 |                          | Dehydration responsive element binding transcription factor            |
| augustus-5-processed-gene-173.16-mRNA-1 | NA | NA       |           | Os05g0351500 | OsR498G0510607000.01.T03 | SAGA-associated factor 11                                              |
| augustus-5-processed-gene-185.27-mRNA-1 | NA | NA       |           | Os05g0367000 | OsR498G0510679800.01.T01 | PHD finger-like domain-containing protein 5b-like                      |
| augustus-5-processed-gene-185.39-mRNA-1 | NA | NA       |           |              |                          | Transposon protein, putative, CACTA, En/Spm sub-class                  |
| augustus-5-processed-gene-187.32-mRNA-1 | NA | NA       |           | Os05g0370000 | OsR498G0510690200.01.T01 | Pentatricopeptide repeat-containing protein                            |
| augustus-5-processed-gene-187.33-mRNA-1 | NA | Japonica |           | Os05g0370000 | OsR498G0510689400.01.T01 | Pentatricopeptide repeat                                               |
| augustus-5-processed-gene-191.14-mRNA-1 | NA | Japonica |           | Os05g0376000 | OsR498G1221118000.01.T01 | RNA-binding (RRM/RBD/RNP motifs) family protein isoform 3              |
| augustus-5-processed-gene-191.26-mRNA-1 | NA | NA       |           | Os05g0376300 | OsR498G0510716000.01.T03 | N-acetyltransferase ESCO1                                              |
| augustus-5-processed-gene-193.33-mRNA-1 | NA | NA       |           | 0            | OsR498G0510734000.01.T01 |                                                                        |
| augustus-5-processed-gene-2.80-mRNA-1   | NA | NA       |           | Os05g0103500 | OsR498G0509565400.01.T01 | MICOS complex subunit mic25a-like                                      |
| augustus-5-processed-gene-20.58-mRNA-1  | NA | NA       |           | 0            | OsR498G0815287700.01.T01 |                                                                        |
| augustus-5-processed-gene-20.59-mRNA-1  | NA | NA       |           |              |                          | PlsC domain-containing protein                                         |
| augustus-5-processed-gene-205.31-mRNA-1 | NA | NA       |           | Os03g0110200 |                          | Transposon protein, putative, Mutator sub-class, expressed             |
| augustus-5-processed-gene-21.12-mRNA-1  | NA | NA       |           | Os07g0543700 | OsR498G0408675500.01.T01 | Retrotransposon protein, putative, Ty3-gypsy sub-class                 |
| augustus-5-processed-gene-22.19-mRNA-1  | NA | NA       |           | 0            | OsR498G0204046800.01.T01 | Circumsporozoite protein-like                                          |
| augustus-5-processed-gene-223.35-mRNA-1 | NA | NA       |           | Os05g0433000 |                          | Serine/threonine-protein kinase SAPK8                                  |
| augustus-5-processed-gene-224.33-mRNA-1 | NA | Japonica |           | Os05g0435800 | OsR498G0102409900.01.T01 | Subtilisin-like protease preproenzyme                                  |
| augustus-5-processed-gene-226.36-mRNA-1 | NA | NA       |           | Os05g0439300 | OsR498G0510924800.01.T01 | Pentatricopeptide repeat                                               |
| augustus-5-processed-gene-226.8-mRNA-1  | NA | Japonica |           | Os05g0438700 | OsR498G0611661000.01.T01 | Histone domain-containing protein (Fragment)                           |
| augustus-5-processed-gene-23.20-mRNA-1  | NA | NA       |           | Os05g0141500 | OsR498G0509713200.01.T03 | E3 ubiquitin-protein like                                              |
| augustus-5-processed-gene-24.37-mRNA-1  | NA | NA       |           | Os05g0142200 |                          |                                                                        |

|                                         |    |          |           |              |                          |                                                                |
|-----------------------------------------|----|----------|-----------|--------------|--------------------------|----------------------------------------------------------------|
| augustus-5-processed-gene-249.30-mRNA-1 | NA | Indica   |           | Os05g0484000 | OsR498G0511067600.01.T01 | DUF295 domain-containing protein                               |
| augustus-5-processed-gene-249.50-mRNA-1 | NA | NA       |           | Os05g0485000 | OsR498G0511070200.01.T01 | Cation/H(+) antiporter 15                                      |
| augustus-5-processed-gene-254.56-mRNA-1 | NA | NA       |           | Os04g0184800 |                          | Transposon protein, putative, Mutator sub-class, expressed     |
| augustus-5-processed-gene-257.40-mRNA-1 | NA | Japonica |           | Os05g0500400 | OsR498G0511115200.01.T01 | DUF1995 domain-containing protein (Fragment)                   |
| augustus-5-processed-gene-259.25-mRNA-1 | NA | NA       |           | 0            | OsR498G0511427100.01.T01 | Epstein-Barr virus EBNA-1-like                                 |
| augustus-5-processed-gene-26.51-mRNA-1  | NA | NA       |           | Os04g0286500 | OsR498G0916692600.01.T01 | Transposon protein, putative, Pong sub-class, expressed        |
| augustus-5-processed-gene-274.50-mRNA-1 | NA | Indica   |           | Os12g0265500 | OsR498G0511226400.01.T01 | HAT family dimerisation domain containing protein, expressed   |
| augustus-5-processed-gene-274.72-mRNA-1 | NA | NA       | LRR-TM    | Os05g0530701 | OsR498G0511233000.01.T01 | Too many mouths protein                                        |
| augustus-5-processed-gene-275.14-mRNA-1 | NA | NA       |           | Os05g0531600 |                          |                                                                |
| augustus-5-processed-gene-275.27-mRNA-1 | NA | Japonica |           | Os05g0532500 | OsR498G0511239400.01.T01 | Hexokinase                                                     |
| augustus-5-processed-gene-275.36-mRNA-1 | NA | NA       |           | 0            | OsR498G0511241800.01.T01 | NB-ARC domain, putative                                        |
| augustus-5-processed-gene-276.44-mRNA-1 | NA | NA       |           |              |                          | Serine O-acetyltransferase                                     |
| augustus-5-processed-gene-277.25-mRNA-1 | NA | NA       |           | Os03g0110200 | OsR498G0102102900.01.T01 | Transposon protein, putative, Mutator sub-class, expressed     |
| augustus-5-processed-gene-277.28-mRNA-1 | NA | NA       |           | Os05g0536800 | OsR498G0511251800.01.T01 | F-box domain-containing protein (Fragment)                     |
| augustus-5-processed-gene-279.26-mRNA-1 | NA | NA       |           | Os05g0539700 | OsR498G0511263800.01.T02 | Nucleosome assembly protein NAP-1                              |
| augustus-5-processed-gene-279.28-mRNA-1 | NA | NA       |           | 0            | OsR498G0511265200.01.T01 | F-box domain-containing protein                                |
| augustus-5-processed-gene-279.32-mRNA-1 | NA | NA       |           | Os05g0540600 | OsR498G0511266200.01.T04 | F-box domain-containing protein (Fragment)                     |
| augustus-5-processed-gene-28.60-mRNA-1  | NA | NA       |           | Os05g0149300 | OsR498G0509738700.01.T01 | 1-aminocyclopropane-1-carboxylate oxidase                      |
| augustus-5-processed-gene-280.76-mRNA-1 | NA | NA       |           | Os05g0542001 |                          |                                                                |
| augustus-5-processed-gene-281.27-mRNA-1 | NA | NA       |           | 0            | OsR498G0815745200.01.T01 | SWIM-type domain-containing protein                            |
| augustus-5-processed-gene-281.47-mRNA-1 | NA | NA       | Kinase-TM | Os05g0545400 | OsR498G0511283000.01.T01 | Mitogen-activated protein kinase kinase kinase ANP1-like       |
| augustus-5-processed-gene-282.38-mRNA-1 | NA | NA       |           | 0            | OsR498G0917328500.01.T01 | Ribonuclease H                                                 |
| augustus-5-processed-gene-285.12-mRNA-1 | NA | NA       |           | Os05g0552000 | OsR498G0511302800.01.T01 |                                                                |
| augustus-5-processed-gene-285.15-mRNA-1 | NA | NA       |           | Os05g0552300 | OsR498G0511303600.01.T01 | Guanine nucleotide-binding protein subunit beta-like protein B |
| augustus-5-processed-gene-285.19-mRNA-1 | NA | NA       |           | Os05g0552700 | OsR498G0511306200.01.T01 | Glycosyltransferase                                            |
| augustus-5-processed-gene-285.3-mRNA-1  | NA | NA       |           | 0            | OsR498G0511302400.01.T02 | CRM-domain containing factor like                              |
| augustus-5-processed-gene-287.26-mRNA-1 | NA | NA       |           | Os05g0556800 | OsR498G0511321600.01.T01 | Purine permease                                                |
| augustus-5-processed-gene-287.4-mRNA-1  | NA | Indica   |           | Os01g0681900 | OsR498G0511318100.01.T02 | NADH-dependent glutamate synthase                              |
| augustus-5-processed-gene-289.2-mRNA-1  | NA | NA       |           |              |                          | U-box domain-containing protein 26                             |
| augustus-5-processed-gene-289.23-mRNA-1 | NA | NA       |           | Os05g0560200 | OsR498G0511333800.01.T01 | DOG1 domain-containing protein (Fragment)                      |
| augustus-5-processed-gene-296.10-mRNA-1 | NA | NA       |           | 0            | OsR498G0511374600.01.T01 | Ethylene-responsive transcription factor                       |
| augustus-5-processed-gene-299.42-mRNA-1 | NA | NA       |           | Os05g0578100 | OsR498G0511396000.01.T01 |                                                                |
| augustus-5-processed-gene-307.56-mRNA-1 | NA | NA       |           | Os05g0595000 |                          | Pathogenesis-related protein 1-22                              |
| augustus-5-processed-gene-307.57-mRNA-1 | NA | NA       |           | Os05g0595200 | OsR498G0511453000.01.T03 | SCP domain-containing protein (Fragment)                       |
| augustus-5-processed-gene-308.31-mRNA-1 | NA | NA       |           | 0            | OsR498G0511460800.01.T01 |                                                                |
| augustus-5-processed-gene-311.18-mRNA-1 | NA | NA       |           | 0            | OsR498G0101349400.01.T01 | Splicing coactivator subunit-like                              |
| augustus-5-processed-gene-39.59-mRNA-1  | NA | NA       |           | Os05g0168800 | OsR498G0509822800.01.T01 | NAB domain-containing protein                                  |
| augustus-5-processed-gene-40.38-mRNA-1  | NA | NA       |           | Os11g0594000 | OsR498G1120440500.01.T01 | Hexose carrier                                                 |
| augustus-5-processed-gene-40.60-mRNA-1  | NA | NA       |           | Os05g0170600 | OsR498G0509829400.01.T02 |                                                                |
| augustus-5-processed-gene-41.27-mRNA-1  | NA | NA       |           | Os05g0521800 |                          |                                                                |
| augustus-5-processed-gene-41.32-mRNA-1  | NA | NA       |           | Os05g0172100 | OsR498G0509836200.01.T01 | Protein kinase domain-containing protein                       |
| augustus-5-processed-gene-44.49-mRNA-1  | NA | NA       |           | Os03g0851300 | OsR498G0307375200.01.T01 | 26S proteasome non-ATPase regulatory subunit A                 |
| augustus-5-processed-gene-50.8-mRNA-1   | NA | Indica   |           | Os05g0183300 | OsR498G0509876800.01.T01 |                                                                |
| augustus-5-processed-gene-51.24-mRNA-1  | NA | NA       |           | Os05g0184901 |                          | DDE Tnp4 domain-containing protein (Fragment)                  |
| augustus-5-processed-gene-63.15-mRNA-1  | NA | NA       |           | Os05g0203000 | OsR498G0509973600.01.T01 | Rapid alkalization factor                                      |
| augustus-5-processed-gene-63.17-mRNA-1  | NA | Japonica |           | Os05g0203400 | OsR498G0509974600.01.T01 | Trifunctional UDP-glucose 4,6-dehydratase                      |
| augustus-5-processed-gene-65.26-mRNA-1  | NA | NA       |           | Os05g0206600 | OsR498G0509988600.01.T01 | DUF641 domain-containing protein (Fragment)                    |
| augustus-5-processed-gene-70.12-mRNA-1  | NA | NA       |           | Os05g0213900 | OsR498G0510014400.01.T01 | Metalloproteinase inhibitor 1                                  |
| augustus-5-processed-gene-74.29-mRNA-1  | NA | Indica   |           | Os03g0693400 | OsR498G0510047800.01.T02 |                                                                |
| augustus-5-processed-gene-75.3-mRNA-1   | NA | NA       |           | Os03g0110200 |                          | Transposon protein, putative, Mutator sub-class                |
| augustus-5-processed-gene-75.5-mRNA-1   | NA | Indica   |           | Os05g0217800 | OsR498G0510051200.01.T01 | BURP domain-containing protein 8                               |
| augustus-5-processed-gene-77.27-mRNA-1  | NA | Japonica |           | Os05g0225800 | OsR498G0510064600.01.T01 | Cell surface glycoprotein 1                                    |
| augustus-5-processed-gene-77.30-mRNA-1  | NA | Japonica |           | Os05g0226000 | OsR498G0510065600.01.T01 | Dextran-binding lectin B                                       |
| augustus-5-processed-gene-79.10-mRNA-1  | NA | Indica   |           | Os03g0772300 | OsR498G0510076400.01.T06 |                                                                |
| augustus-5-processed-gene-96.49-mRNA-1  | NA | NA       |           | 0            | OsR498G0408756900.01.T01 | Endonuclease                                                   |
| augustus-6-processed-gene-111.20-mRNA-1 | NA | Japonica |           | Os06g0303400 | OsR498G0815345200.01.T02 | Aconitate hydratase 3 mitochondrial                            |
| augustus-6-processed-gene-147.15-mRNA-1 | NA | NA       |           | Os06g0475800 |                          | FAR1 domain-containing protein (Fragment)                      |
| augustus-6-processed-gene-164.11-mRNA-1 | NA | NA       |           |              |                          | Retrotransposon protein, putative, LINE subclass               |
| augustus-6-processed-gene-185.9-mRNA-1  | NA | NA       |           |              |                          | Putative nucleotidyltransferase, Hydrolase                     |
| augustus-6-processed-gene-189.9-mRNA-1  | NA | NA       |           | Os01g0387333 | OsR498G0815569700.01.T02 |                                                                |
| augustus-6-processed-gene-21.66-mRNA-1  | NA | NA       |           | 0            | OsR498G0611605400.01.T01 | SANT domain-containing protein                                 |

|                                         |    |          |            |              |                          |                                                                           |
|-----------------------------------------|----|----------|------------|--------------|--------------------------|---------------------------------------------------------------------------|
| augustus-6-processed-gene-229.12-mRNA-1 | NA | NA       |            | Os08g0381000 | OsR498G0305961100.01.T01 | Cell wall protein-like                                                    |
| augustus-6-processed-gene-245.23-mRNA-1 | NA | NA       |            |              |                          | Retrotransposon protein, putative, unclassified, expressed                |
| augustus-6-processed-gene-26.33-mRNA-1  | NA | NA       |            | Os06g0150400 | OsR498G0611633600.01.T01 | Saposin B-type domain-containing protein (Fragment)                       |
| augustus-6-processed-gene-262.6-mRNA-1  | NA | NA       |            | 0            | OsR498G0408153000.01.T01 | Splicing coactivator subunit-like                                         |
| augustus-6-processed-gene-266.15-mRNA-1 | NA | Japonica |            | Os06g0647200 | OsR498G0613060500.01.T01 | Two-component response regulator like                                     |
| augustus-6-processed-gene-281.22-mRNA-1 | NA | NA       |            |              |                          | Fiber polyubiquitin                                                       |
| augustus-6-processed-gene-299.7-mRNA-1  | NA | NA       |            | Os06g0704400 |                          | Transposon protein, putative, mutator sub-class                           |
| augustus-6-processed-gene-300.13-mRNA-1 | NA | NA       |            | Os07g0513300 | OsR498G0100612800.01.T01 | PMD domain-containing protein (Fragment)                                  |
| augustus-6-processed-gene-33.72-mRNA-1  | NA | NA       | LRR-NBS-TM |              |                          | Leaf rust resistance protein Lr10                                         |
| augustus-6-processed-gene-40.30-mRNA-1  | NA | NA       |            | Os06g0179900 | OsR498G0611719200.01.T01 | Glycerol-3-phosphate transporter                                          |
| augustus-6-processed-gene-41.7-mRNA-1   | NA | NA       |            | Os06g0181500 | OsR498G0611725400.01.T02 | Plasma membrane ATPase                                                    |
| augustus-6-processed-gene-49.25-mRNA-1  | NA | NA       |            | Os04g0120000 | OsR498G0509881000.01.T01 | Hydroxyproline-rich glycoprotein-like                                     |
| augustus-6-processed-gene-54.13-mRNA-1  | NA | NA       |            | Os06g0205250 | OsR498G0611814400.01.T02 |                                                                           |
| augustus-6-processed-gene-9.46-mRNA-1   | NA | NA       |            | Os06g0115600 | OsR498G0611510900.01.T01 | CYCLOPS transcription factor                                              |
| augustus-6-processed-gene-91.47-mRNA-1  | NA | NA       |            | Os06g0269300 | OsR498G0612071400.01.T01 | NHL repeat-containing protein-like                                        |
| augustus-6-processed-gene-94.48-mRNA-1  | NA | NA       |            | 0            | OsR498G0307403400.01.T01 | Endonuclease                                                              |
| augustus-7-processed-gene-0.5-mRNA-1    | NA | NA       |            | Os07g0100200 | OsR498G0713353000.01.T01 | Pyridoxal biosynthesis lyase pdxS                                         |
| augustus-7-processed-gene-0.7-mRNA-1    | NA | NA       |            | Os07g0100900 | OsR498G0713355400.01.T02 |                                                                           |
| augustus-7-processed-gene-1.24-mRNA-1   | NA | NA       |            | Os07g0102500 | OsR498G0713361200.01.T01 | La-related protein like                                                   |
| augustus-7-processed-gene-10.4-mRNA-1   | NA | NA       |            | 0            | OsR498G1220887700.01.T01 | Hydroxyproline-rich glycoprotein-like                                     |
| augustus-7-processed-gene-11.19-mRNA-1  | NA | NA       |            | Os07g0129200 | OsR498G0713452700.01.T01 | Pathogenesis-related protein 1-9                                          |
| augustus-7-processed-gene-11.21-mRNA-1  | NA | NA       |            | Os07g0129300 | OsR498G0713453500.01.T01 | Pathogenesis-related protein 1                                            |
| augustus-7-processed-gene-11.23-mRNA-1  | NA | NA       |            | Os07g0129300 | OsR498G0713453500.01.T01 | Pathogenesis-related protein 1                                            |
| augustus-7-processed-gene-110.14-mRNA-1 | NA | NA       |            |              |                          |                                                                           |
| augustus-7-processed-gene-114.19-mRNA-1 | NA | NA       |            | Os03g0110200 |                          | Transposon protein, putative, Mutator sub-class, expressed                |
| augustus-7-processed-gene-12.20-mRNA-1  | NA | Japonica | Kinase-TM  | Os07g0130300 | OsR498G0713999000.01.T01 | L-type lectin-domain containing receptor kinase IV.1                      |
| augustus-7-processed-gene-12.22-mRNA-1  | NA | Japonica | Kinase-TM  | Os07g0130600 | OsR498G0916878800.01.T01 | Putative receptor kinase Lecrk                                            |
| augustus-7-processed-gene-12.23-mRNA-1  | NA | Japonica | Kinase-TM  | Os07g0130700 | OsR498G0713461800.01.T01 | L-type lectin-domain containing receptor kinase IV.1                      |
| augustus-7-processed-gene-12.25-mRNA-1  | NA | NA       | Kinase-TM  | Os07g0130800 | OsR498G0713462000.01.T01 | Putative receptor kinase Lecrk                                            |
| augustus-7-processed-gene-14.25-mRNA-1  | NA | NA       |            | Os07g0135600 |                          |                                                                           |
| augustus-7-processed-gene-140.16-mRNA-1 | NA | NA       |            | Os05g0267732 | OsR498G0510213400.01.T01 |                                                                           |
| augustus-7-processed-gene-143.5-mRNA-1  | NA | NA       |            | Os07g0437500 | OsR498G0714162100.01.T05 | Aromatic-L-amino-acid/L-histidine decarboxylase                           |
| augustus-7-processed-gene-145.5-mRNA-1  | NA | NA       |            |              |                          |                                                                           |
| augustus-7-processed-gene-148.36-mRNA-1 | NA | NA       |            | 0            | OsR498G0510294600.01.T01 | HGWP repeat containing protein-like                                       |
| augustus-7-processed-gene-15.14-mRNA-1  | NA | NA       |            | 0            | OsR498G0713478500.01.T01 | Myb-like protein L                                                        |
| augustus-7-processed-gene-15.2-mRNA-1   | NA | NA       |            | 0            | OsR498G0713476900.01.T01 |                                                                           |
| augustus-7-processed-gene-16.18-mRNA-1  | NA | Indica   |            | Os07g0137900 | OsR498G0713482500.01.T01 | PERQ amino acid-rich with GYF domain-containing protein 2                 |
| augustus-7-processed-gene-16.31-mRNA-1  | NA | NA       |            | 0            | OsR498G0713484400.01.T03 | Zinc finger CCCH domain-containing protein 47                             |
| augustus-7-processed-gene-17.0-mRNA-1   | NA | NA       |            | Os07g0139400 | OsR498G0713487700.01.T06 | Probable UDP-arabinose 4-epimerase 1                                      |
| augustus-7-processed-gene-17.17-mRNA-1  | NA | NA       |            | Os07g0141600 | OsR498G0713493700.01.T04 | U4/U6 small nuclear ribonucleoprotein Prp31 homolog                       |
| augustus-7-processed-gene-17.28-mRNA-1  | NA | Indica   |            | Os03g0233200 | OsR498G0713488800.01.T01 | Pathogenesis-related protein 5                                            |
| augustus-7-processed-gene-178.20-mRNA-1 | NA | NA       |            | Os07g0489200 | OsR498G0714328400.01.T01 | Glycosyltransferase                                                       |
| augustus-7-processed-gene-178.21-mRNA-1 | NA | Indica   |            | Os07g0489300 | OsR498G0714329200.01.T01 | Glycosyltransferase                                                       |
| augustus-7-processed-gene-179.47-mRNA-1 | NA | NA       |            | Os07g0489950 | OsR498G0714332300.01.T01 | Glycosyltransferase                                                       |
| augustus-7-processed-gene-179.48-mRNA-1 | NA | Japonica |            | Os07g0490100 | OsR498G0714332300.01.T01 | Glycosyltransferase                                                       |
| augustus-7-processed-gene-179.63-mRNA-1 | NA | NA       |            | 0            | OsR498G0714339100.01.T01 |                                                                           |
| augustus-7-processed-gene-179.66-mRNA-1 | NA | Japonica |            | Os07g0491500 | OsR498G0714340300.01.T01 | Putative fertility restorer homologue                                     |
| augustus-7-processed-gene-18.0-mRNA-1   | NA | NA       |            | Os07g0142000 | OsR498G0713494900.01.T01 | Reticulon-like protein (Fragment)                                         |
| augustus-7-processed-gene-18.1-mRNA-1   | NA | NA       |            | Os07g0142200 | OsR498G0713495500.01.T01 | Verprolin                                                                 |
| augustus-7-processed-gene-18.13-mRNA-1  | NA | NA       |            | Os07g0142600 | OsR498G0713496100.01.T01 | RNA-binding protein like                                                  |
| augustus-7-processed-gene-18.30-mRNA-1  | NA | NA       |            | 0            | OsR498G0713495800.01.T01 | IAA-amino acid hydrolase ILR1-like 5                                      |
| augustus-7-processed-gene-18.31-mRNA-1  | NA | NA       |            | Os07g0142700 | OsR498G0713496600.01.T01 | N-hydroxycinnamoyl benzoyltransferase-like protein                        |
| augustus-7-processed-gene-180.31-mRNA-1 | NA | NA       |            |              |                          | Transposon protein, putative, Mutator sub-class, expressed                |
| augustus-7-processed-gene-181.23-mRNA-1 | NA | NA       | Kinase-TM  | Os07g0493800 | OsR498G0714347500.01.T01 | Wall-associated protein kinase                                            |
| augustus-7-processed-gene-181.53-mRNA-1 | NA | NA       |            |              |                          | Mitochondrial import inner membrane translocase subunit Tim17/Tim22/Tim23 |
| augustus-7-processed-gene-182.53-mRNA-1 | NA | NA       |            | Os07g0496300 |                          | protein FAR-RED IMPAIRED RESPONSE 1-like                                  |
| augustus-7-processed-gene-184.40-mRNA-1 | NA | NA       |            | Os07g0499850 |                          |                                                                           |
| augustus-7-processed-gene-185.14-mRNA-1 | NA | NA       |            | Os07g0501700 | OsR498G0714373300.01.T01 | Pollen-specific C2 domain containing protein                              |
| augustus-7-processed-gene-185.26-mRNA-1 | NA | NA       |            | Os07g0501500 |                          | Stripe rust resistance protein-like                                       |
| augustus-7-processed-gene-186.13-mRNA-1 | NA | Japonica |            | Os07g0503300 | OsR498G0714376200.01.T01 | Glycosyltransferase                                                       |
| augustus-7-processed-gene-187.4-mRNA-1  | NA | NA       |            | 0            | OsR498G0714379900.01.T01 | TFIIB domain-containing protein                                           |

|                                          |    |          |               |              |                          |                                                                          |
|------------------------------------------|----|----------|---------------|--------------|--------------------------|--------------------------------------------------------------------------|
| augustus-7-processed-gene-190.4-mRNA-1   | NA | NA       |               | Os07g0508900 | OsR498G0714398700.01.T01 | Zinc finger transcription factor                                         |
| augustus-7-processed-gene-190.6-mRNA-1   | NA | NA       |               | 0            | OsR498G0714399700.01.T01 |                                                                          |
| augustus-7-processed-gene-191.7-mRNA-1   | NA | NA       |               | Os07g0510400 | OsR498G0714405200.01.T01 | UDP-glycosyltransferase 71B1                                             |
| augustus-7-processed-gene-192.0-mRNA-1   | NA | NA       |               | Os07g0511100 | OsR498G0714407900.01.T01 | Glycine-rich cell wall structural protein 1                              |
| augustus-7-processed-gene-193.54-mRNA-1  | NA | NA       |               | Os07g0514400 |                          | DUF629 domain-containing protein                                         |
| augustus-7-processed-gene-194.16-mRNA-1  | NA | NA       |               | Os07g0515700 | OsR498G0714424300.01.T03 |                                                                          |
| augustus-7-processed-gene-195.13-mRNA-1  | NA | NA       |               | Os07g0516400 | OsR498G0714428500.01.T01 |                                                                          |
| augustus-7-processed-gene-195.20-mRNA-1  | NA | NA       |               | 0            | OsR498G0714433500.01.T01 | Adenosinetriphosphatase                                                  |
| augustus-7-processed-gene-196.1-mRNA-1   | NA | NA       |               | Os07g0517700 | OsR498G0714434300.01.T01 | Adenosinetriphosphatase                                                  |
| augustus-7-processed-gene-196.5-mRNA-1   | NA | NA       |               | Os03g0584300 | OsR498G0306462300.01.T02 | Adenosinetriphosphatase                                                  |
| augustus-7-processed-gene-197.118-mRNA-1 | NA | NA       | CC-LRR-NBS-TM | 0            | OsR498G0714447800.01.T03 | Putative resistance complex protein I2C-2                                |
| augustus-7-processed-gene-197.81-mRNA-1  | NA | NA       |               | Os07g0518500 | OsR498G0714438700.01.T01 | Taxane 10-beta-hydroxylase                                               |
| augustus-7-processed-gene-197.89-mRNA-1  | NA | NA       |               | Os07g0520300 | OsR498G0714443500.01.T01 |                                                                          |
| augustus-7-processed-gene-2.51-mRNA-1    | NA | NA       |               | Os07g0158400 |                          | GCK domain-containing protein (Fragment)                                 |
| augustus-7-processed-gene-2.67-mRNA-1    | NA | NA       |               | Os07g0157700 |                          |                                                                          |
| augustus-7-processed-gene-200.12-mRNA-1  | NA | Indica   |               | Os07g0527600 | OsR498G0714469300.01.T01 | Putative carboxylesterase 13                                             |
| augustus-7-processed-gene-204.8-mRNA-1   | NA | NA       |               |              |                          | Putative ankyrin repeat-containing domain, PGD domain-containing protein |
| augustus-7-processed-gene-204.9-mRNA-1   | NA | NA       |               | 0            | OsR498G0204046800.01.T01 | Epstein-Barr virus EBNA-1-like                                           |
| augustus-7-processed-gene-206.27-mRNA-1  | NA | Indica   |               | Os07g0535700 | OsR498G0714500100.01.T01 | Receptor-like kinase-like                                                |
| augustus-7-processed-gene-207.11-mRNA-1  | NA | NA       |               | Os07g0537701 |                          |                                                                          |
| augustus-7-processed-gene-207.17-mRNA-1  | NA | NA       |               | 0            | OsR498G0511427100.01.T01 | Epstein-Barr virus EBNA-1-like                                           |
| augustus-7-processed-gene-208.7-mRNA-1   | NA | NA       | Kinase-TM     |              |                          | Receptor-like serine/threonine-protein kinase                            |
| augustus-7-processed-gene-211.29-mRNA-1  | NA | NA       |               | Os07g0543750 |                          |                                                                          |
| augustus-7-processed-gene-217.17-mRNA-1  | NA | NA       |               | Os07g0554500 | OsR498G0714554100.01.T01 | F-box domain-containing protein                                          |
| augustus-7-processed-gene-217.19-mRNA-1  | NA | Japonica |               | Os07g0554900 | OsR498G0714555500.01.T02 | F-box domain-containing protein                                          |
| augustus-7-processed-gene-217.31-mRNA-1  | NA | NA       |               | Os07g0555100 | OsR498G0714555900.01.T01 | F-box domain-containing protein (Fragment)                               |
| augustus-7-processed-gene-217.38-mRNA-1  | NA | NA       |               | Os07g0556200 | OsR498G0714559100.01.T01 | Plastoquinol--plastocyanin reductase                                     |
| augustus-7-processed-gene-22.35-mRNA-1   | NA | Japonica |               | Os07g0150200 | OsR498G0713519100.01.T01 | 40S ribosomal protein S12                                                |
| augustus-7-processed-gene-220.33-mRNA-1  | NA | NA       |               | Os05g0225100 | OsR498G0510061500.01.T01 | DUF295 domain-containing protein                                         |
| augustus-7-processed-gene-220.35-mRNA-1  | NA | NA       |               | Os07g0562300 | OsR498G0714577600.01.T01 | Organic cation/carnitine transporter 3                                   |
| augustus-7-processed-gene-221.2-mRNA-1   | NA | NA       |               | Os07g0579000 | OsR498G0714629300.01.T01 | AP2-like protein ethylene-responsive transcription factor BBM            |
| augustus-7-processed-gene-223.6-mRNA-1   | NA | NA       |               | Os04g0613400 | OsR498G0714587700.01.T03 | Cell differentiation protein rcd1                                        |
| augustus-7-processed-gene-227.42-mRNA-1  | NA | Indica   |               | Os06g0338200 | OsR498G0714609700.01.T02 | Amine oxidase                                                            |
| augustus-7-processed-gene-227.45-mRNA-1  | NA | NA       |               | Os07g0572300 | OsR498G0714610500.01.T01 | DUF868 domain-containing protein                                         |
| augustus-7-processed-gene-229.1-mRNA-1   | NA | NA       |               | Os07g0573000 |                          | Adenylyl-sulfate kinase                                                  |
| augustus-7-processed-gene-23.0-mRNA-1    | NA | NA       |               | Os07g0150901 |                          |                                                                          |
| augustus-7-processed-gene-231.4-mRNA-1   | NA | NA       |               | Os07g0577300 | OsR498G0714622900.01.T06 | Glucan endo-1,3-beta-D-glucosidase                                       |
| augustus-7-processed-gene-231.6-mRNA-1   | NA | NA       |               | Os07g0577500 | OsR498G0714623100.01.T02 | Constitutive photomorphogenesis protein 10                               |
| augustus-7-processed-gene-232.23-mRNA-1  | NA | NA       |               | Os07g0579000 | OsR498G0714629300.01.T01 | AP2-like protein ethylene-responsive transcription factor BBM            |
| augustus-7-processed-gene-232.59-mRNA-1  | NA | NA       |               | Os07g0580700 |                          |                                                                          |
| augustus-7-processed-gene-232.60-mRNA-1  | NA | NA       |               | 0            | OsR498G0714633600.01.T01 |                                                                          |
| augustus-7-processed-gene-238.35-mRNA-1  | NA | NA       |               | 0            | OsR498G0714678700.01.T01 |                                                                          |
| augustus-7-processed-gene-238.49-mRNA-1  | NA | Japonica |               | Os07g0591100 | OsR498G0714678000.01.T01 | Soluble secretory phospholipase A2 receptor                              |
| augustus-7-processed-gene-239.20-mRNA-1  | NA | NA       |               | Os07g0592000 | OsR498G0714681300.01.T02 | Gibberellin stimulated transcript (Fragment)                             |
| augustus-7-processed-gene-239.21-mRNA-1  | NA | NA       |               | Os07g0592100 | OsR498G0714681500.01.T02 | Putative sex determination protein tasselseed 2                          |
| augustus-7-processed-gene-239.35-mRNA-1  | NA | NA       |               | Os07g0593000 | OsR498G0714684100.01.T01 | Zinc finger protein 7                                                    |
| augustus-7-processed-gene-24.0-mRNA-1    | NA | NA       |               | Os07g0152000 | OsR498G0713530300.01.T01 | Transcription factor PCF6                                                |
| augustus-7-processed-gene-24.1-mRNA-1    | NA | NA       |               | 0            | OsR498G0713531500.01.T01 | Putative calcineurin B                                                   |
| augustus-7-processed-gene-24.4-mRNA-1    | NA | NA       |               | Os09g0562400 | OsR498G0101823900.01.T01 | Transposon protein, putative, Mutator sub-class, expressed               |
| augustus-7-processed-gene-241.46-mRNA-1  | NA | NA       |               | Os07g0598200 | OsR498G0714699700.01.T01 | EID1-like F-box protein 2 isoform C                                      |
| augustus-7-processed-gene-242.11-mRNA-1  | NA | NA       |               | Os07g0600300 | OsR498G0714706300.01.T01 | APO protein 3 mitochondrial                                              |
| augustus-7-processed-gene-244.0-mRNA-1   | NA | NA       | Kinase-LRR-TM | Os07g0602700 | OsR498G0714714100.01.T01 | LRR receptor-like serine/threonine-protein kinase                        |
| augustus-7-processed-gene-244.17-mRNA-1  | NA | Japonica |               | Os07g0603500 | OsR498G1018815700.01.T01 | Peptidase A1 domain-containing protein                                   |
| augustus-7-processed-gene-244.2-mRNA-1   | NA | Indica   |               | Os07g0602800 | OsR498G0714714600.01.T01 | Glycerophosphodiester phosphodiesterase                                  |
| augustus-7-processed-gene-244.6-mRNA-1   | NA | NA       |               | Os07g0603200 | OsR498G0714716900.01.T02 | U3 small nucleolar RNA-associated protein 18 like                        |
| augustus-7-processed-gene-25.1-mRNA-1    | NA | NA       |               | Os07g0154100 | OsR498G0713538700.01.T01 | Plastid 9-cis-epoxycarotenoid dioxygenase                                |
| augustus-7-processed-gene-25.6-mRNA-1    | NA | NA       |               | Os07g0154300 | OsR498G0713539500.01.T01 | outer envelope membrane protein 7                                        |
| augustus-7-processed-gene-250.63-mRNA-1  | NA | NA       |               | Os04g0429450 | OsR498G0408675500.01.T01 | Retrotransposon protein, putative, Ty3-gypsy sub-class                   |
| augustus-7-processed-gene-251.14-mRNA-1  | NA | NA       |               | Os07g0615900 |                          |                                                                          |
| augustus-7-processed-gene-26.59-mRNA-1   | NA | NA       |               | Os07g0158400 |                          | GCK domain-containing protein (Fragment)                                 |
| augustus-7-processed-gene-26.71-mRNA-1   | NA | NA       |               | Os07g0157700 |                          |                                                                          |

|                                          |    |          |               |              |                          |                                                                           |
|------------------------------------------|----|----------|---------------|--------------|--------------------------|---------------------------------------------------------------------------|
| augustus-7-processed-gene-268.59-mRNA-1  | NA | NA       |               | Os07g0646500 |                          | MULE domain-containing protein                                            |
| augustus-7-processed-gene-271.29-mRNA-1  | NA | NA       |               |              |                          | AT hook motif-containing protein, putative                                |
| augustus-7-processed-gene-276.62-mRNA-1  | NA | NA       |               |              |                          | Protein CHROMATIN REMODELING 5                                            |
| augustus-7-processed-gene-277.18-mRNA-1  | NA | NA       |               | Os07g0662700 |                          | Pentatricopeptide repeat-containing protein, chloroplastic                |
| augustus-7-processed-gene-278.103-mRNA-1 | NA | NA       |               | Os07g0663200 |                          | Cyst nematode resistance protein-like protein                             |
| augustus-7-processed-gene-278.108-mRNA-1 | NA | NA       |               | Os07g0663000 |                          |                                                                           |
| augustus-7-processed-gene-278.114-mRNA-1 | NA | NA       |               | Os07g0663800 | OsR498G0714906100.01.T01 | Putative sex determination protein tasselseed 2                           |
| augustus-7-processed-gene-278.124-mRNA-1 | NA | NA       |               | Os07g0664500 | OsR498G0714909900.01.T01 | Putative sex determination protein tasselseed 2                           |
| augustus-7-processed-gene-28.9-mRNA-1    | NA | NA       | NBS-TM        | Os07g0160300 | OsR498G0713563100.01.T01 | P-loop containing nucleoside triphosphate hydrolase                       |
| augustus-7-processed-gene-280.63-mRNA-1  | NA | NA       |               | Os07g0668800 | OsR498G0714924900.01.T01 | BTB/POZ domain-containing protein At3g05675                               |
| augustus-7-processed-gene-280.81-mRNA-1  | NA | NA       |               | Os07g0668600 | OsR498G0714924000.01.T01 | Zinc finger CCCH domain-containing protein 54                             |
| augustus-7-processed-gene-285.36-mRNA-1  | NA | Japonica | Kinase-TM     | Os07g0678300 | OsR498G0306613200.01.T01 | Non-specific serine/threonine protein kinase                              |
| augustus-7-processed-gene-285.47-mRNA-1  | NA | NA       | Kinase-TM     | Os07g0678600 | OsR498G0714955800.01.T01 | CBL-interacting protein kinase                                            |
| augustus-7-processed-gene-3.14-mRNA-1    | NA | NA       |               | Os07g0111900 | OsR498G0713392900.01.T01 | Flavin-containing monooxygenase                                           |
| augustus-7-processed-gene-3.19-mRNA-1    | NA | NA       |               |              |                          | AT hook motif-containing protein, putative                                |
| augustus-7-processed-gene-3.2-mRNA-1     | NA | NA       |               | 0            | OsR498G0713391500.01.T01 |                                                                           |
| augustus-7-processed-gene-3.4-mRNA-1     | NA | NA       |               | Os07g0111700 | OsR498G0713392100.01.T02 | Flavin-containing monooxygenase                                           |
| augustus-7-processed-gene-32.27-mRNA-1   | NA | Indica   |               | Os07g0168800 | OsR498G0713590600.01.T03 | Zinc finger A20 and AN1 domain-containing stress-associated protein 9     |
| augustus-7-processed-gene-33.15-mRNA-1   | NA | NA       |               | 0            | OsR498G0713593400.01.T01 | Zinc finger A20 domain-containing stress-associated protein 18            |
| augustus-7-processed-gene-35.22-mRNA-1   | NA | NA       |               |              |                          |                                                                           |
| augustus-7-processed-gene-35.23-mRNA-1   | NA | NA       |               | Os07g0176200 | OsR498G0713615500.01.T02 | CRC domain-containing protein (Fragment)                                  |
| augustus-7-processed-gene-35.35-mRNA-1   | NA | NA       |               | Os08g0148233 | OsR498G0815992700.01.T01 | Organic cation transporter-like                                           |
| augustus-7-processed-gene-36.16-mRNA-1   | NA | Japonica |               | Os07g0177400 | OsR498G0713623600.01.T01 |                                                                           |
| augustus-7-processed-gene-36.18-mRNA-1   | NA | NA       |               | 0            | OsR498G0713622400.01.T01 |                                                                           |
| augustus-7-processed-gene-36.9-mRNA-1    | NA | NA       |               | Os07g0176900 | OsR498G0713620600.01.T01 | Ribose-5-phosphate isomerase                                              |
| augustus-7-processed-gene-4.29-mRNA-1    | NA | NA       |               | Os07g0113500 | OsR498G0713398700.01.T01 | Pentatricopeptide repeat-containing protein, chloroplastic                |
| augustus-7-processed-gene-4.34-mRNA-1    | NA | NA       |               | Os07g0113700 | OsR498G0713400200.01.T01 | Suppressor of RPS4-RLD 1                                                  |
| augustus-7-processed-gene-40.24-mRNA-1   | NA | NA       |               | Os07g0184200 | OsR498G0713641500.01.T01 | DUF295 domain-containing protein                                          |
| augustus-7-processed-gene-44.7-mRNA-1    | NA | NA       |               | Os07g0190400 | OsR498G0713665100.01.T01 |                                                                           |
| augustus-7-processed-gene-45.11-mRNA-1   | NA | NA       |               | Os07g0191500 | OsR498G0713671300.01.T01 | Plasma membrane ATPase 1                                                  |
| augustus-7-processed-gene-45.16-mRNA-1   | NA | NA       |               | Os07g0192000 | OsR498G0713673300.01.T01 | Adenosinetriphosphatase                                                   |
| augustus-7-processed-gene-45.2-mRNA-1    | NA | NA       |               | Os07g0191200 | OsR498G0713669500.01.T06 | Plasma membrane ATPase                                                    |
| augustus-7-processed-gene-46.24-mRNA-1   | NA | Japonica |               | Os07g0192800 | OsR498G0713676200.01.T01 | Adenosinetriphosphatase                                                   |
| augustus-7-processed-gene-47.8-mRNA-1    | NA | Indica   |               | Os07g0194300 | OsR498G0713682000.01.T01 | glycine-rich cell wall structural protein isoform X3                      |
| augustus-7-processed-gene-48.29-mRNA-1   | NA | NA       |               | 0            | OsR498G0511427100.01.T01 | Epstein-Barr virus EBNA-1-like                                            |
| augustus-7-processed-gene-5.2-mRNA-1     | NA | NA       |               | 0            | OsR498G0713406900.01.T01 | F5/8 type C domain-containing protein                                     |
| augustus-7-processed-gene-5.9-mRNA-1     | NA | NA       |               | Os07g0115700 |                          | Retrotransposon protein, putative, LINE subclass                          |
| augustus-7-processed-gene-53.15-mRNA-1   | NA | NA       |               | Os07g0206800 | OsR498G0713723000.01.T01 | Late embryogenesis abundant (LEA) hydroxyproline-rich glycoprotein family |
| augustus-7-processed-gene-54.45-mRNA-1   | NA | Indica   |               | Os07g0208100 | OsR498G0713726400.01.T02 | Putative polygalacturonase PG1                                            |
| augustus-7-processed-gene-54.46-mRNA-1   | NA | NA       |               | 0            | OsR498G0204658700.01.T03 | Ribosomal protein-like                                                    |
| augustus-7-processed-gene-56.7-mRNA-1    | NA | NA       |               | Os07g0210100 | OsR498G0713740600.01.T06 | Exocyst subunit Exo70 family protein (Fragment)                           |
| augustus-7-processed-gene-56.9-mRNA-1    | NA | NA       |               | Os03g0643100 | OsR498G0713742400.01.T01 | DNA topoisomerase 2                                                       |
| augustus-7-processed-gene-58.16-mRNA-1   | NA | Indica   |               | Os07g0213800 | OsR498G0713761200.01.T01 | AAI domain-containing protein                                             |
| augustus-7-processed-gene-58.19-mRNA-1   | NA | NA       |               | Os07g0214100 | OsR498G0713762000.01.T01 | Seed allergenic protein RAG1                                              |
| augustus-7-processed-gene-58.20-mRNA-1   | NA | Indica   |               | Os07g0214300 | OsR498G0713762400.01.T01 | Seed allergenic protein RAG2                                              |
| augustus-7-processed-gene-59.26-mRNA-1   | NA | NA       |               | Os07g0215500 | OsR498G0713769000.01.T01 | Seed allergenic protein RAG2                                              |
| augustus-7-processed-gene-59.6-mRNA-1    | NA | NA       |               | Os07g0214600 | OsR498G0713764600.01.T01 | Seed allergenic protein RAG2                                              |
| augustus-7-processed-gene-6.22-mRNA-1    | NA | NA       |               |              |                          | Fusarium resistance protein I2C-5-like                                    |
| augustus-7-processed-gene-60.11-mRNA-1   | NA | NA       |               | 0            | OsR498G0713780300.01.T01 | Reverse transcriptase domain-containing protein                           |
| augustus-7-processed-gene-60.16-mRNA-1   | NA | NA       |               | Os07g0216600 | OsR498G0713776200.01.T01 | AAI domain-containing protein                                             |
| augustus-7-processed-gene-60.2-mRNA-1    | NA | NA       |               | 0            | OsR498G0511427100.01.T01 | Epstein-Barr virus EBNA-1-like                                            |
| augustus-7-processed-gene-60.20-mRNA-1   | NA | NA       |               | Os07g0216700 | OsR498G0713778000.01.T01 | AAI domain-containing protein                                             |
| augustus-7-processed-gene-61.0-mRNA-1    | NA | NA       |               | Os07g0217600 | OsR498G0713782100.01.T01 | Ent-cassadiene C2-hydroxylase                                             |
| augustus-8-processed-gene-100.23-mRNA-1  | NA | NA       | NBS-TM        | 0            | OsR498G0815571800.01.T01 | Disease resistance protein RPM1                                           |
| augustus-8-processed-gene-103.21-mRNA-1  | NA | NA       |               | Os08g0265350 | OsR498G0815581600.01.T04 |                                                                           |
| augustus-8-processed-gene-103.47-mRNA-1  | NA | NA       | LRR-TM        | Os08g0266400 |                          | Putative somatic embryogenesis protein kinase 1                           |
| augustus-8-processed-gene-104.34-mRNA-1  | NA | NA       |               | 0            | OsR498G0815591600.01.T02 | GTD-binding domain-containing protein (Fragment)                          |
| augustus-8-processed-gene-110.20-mRNA-1  | NA | NA       |               | 0            | OsR498G0203809100.01.T01 | DUF834 domain-containing protein                                          |
| augustus-8-processed-gene-110.4-mRNA-1   | NA | NA       | Kinase-LRR-TM | Os08g0276400 | OsR498G0815617800.01.T01 | Tyrosine-protein kinase                                                   |
| augustus-8-processed-gene-111.10-mRNA-1  | NA | NA       |               | Os03g0110200 |                          | Transposon protein, putative, Mutator sub-class                           |
| augustus-8-processed-gene-111.14-mRNA-1  | NA | NA       |               | Os08g0278600 | OsR498G0815626400.01.T02 | succinate dehydrogenase assembly factor 1, mitochondrial                  |

|                                         |    |          |               |              |                          |                                                                          |
|-----------------------------------------|----|----------|---------------|--------------|--------------------------|--------------------------------------------------------------------------|
| augustus-8-processed-gene-111.16-mRNA-1 | NA | NA       |               |              |                          | Stromal cell-derived factor 2                                            |
| augustus-8-processed-gene-112.3-mRNA-1  | NA | NA       |               | 0            | OsR498G0306743300.01.T01 | Transposon protein, putative, CACTA, En/Spm sub-class                    |
| augustus-8-processed-gene-116.32-mRNA-1 | NA | Japonica |               | Os08g0285100 | OsR498G0815645000.01.T01 | DLH domain-containing protein                                            |
| augustus-8-processed-gene-121.30-mRNA-1 | NA | NA       |               | Os08g0290000 | OsR498G0815664400.01.T06 | Pentatricopeptide repeat-containing protein                              |
| augustus-8-processed-gene-121.9-mRNA-1  | NA | NA       |               | 0            | OsR498G0203809100.01.T01 | DUF834 domain-containing protein                                         |
| augustus-8-processed-gene-122.25-mRNA-1 | NA | NA       |               |              |                          |                                                                          |
| augustus-8-processed-gene-129.2-mRNA-1  | NA | NA       |               |              |                          | Transposon protein, putative, Mutator sub-class, expressed               |
| augustus-8-processed-gene-136.23-mRNA-1 | NA | NA       |               | Os07g0433200 | OsR498G0510328900.01.T01 |                                                                          |
| augustus-8-processed-gene-137.3-mRNA-1  | NA | NA       |               |              |                          | Retrotransposon protein, putative, Ty3-gypsy sub-class                   |
| augustus-8-processed-gene-139.4-mRNA-1  | NA | NA       |               | Os11g0703000 | OsR498G1221905100.01.T01 | Pathogenesis-related protein 5                                           |
| augustus-8-processed-gene-140.6-mRNA-1  | NA | NA       |               | Os03g0110200 |                          | Transposon protein, putative, Mutator sub-class, expressed               |
| augustus-8-processed-gene-141.24-mRNA-1 | NA | NA       |               | 0            | OsR498G0100560400.01.T01 | Nuclear antigen LANA-1                                                   |
| augustus-8-processed-gene-141.27-mRNA-1 | NA | NA       |               | Os08g0318500 | OsR498G0815757200.01.T04 | Exocyst complex component like                                           |
| augustus-8-processed-gene-142.21-mRNA-1 | NA | NA       |               | 0            | OsR498G0815762600.01.T01 |                                                                          |
| augustus-8-processed-gene-144.11-mRNA-1 | NA | NA       |               | 0            | OsR498G0815770400.01.T01 |                                                                          |
| augustus-8-processed-gene-145.21-mRNA-1 | NA | NA       |               | Os08g0323400 | OsR498G0815777800.01.T01 | Rubredoxin-like domain-containing protein (Fragment)                     |
| augustus-8-processed-gene-151.41-mRNA-1 | NA | Indica   |               | Os05g0225100 | OsR498G0815802000.01.T01 | DUF295 domain-containing protein                                         |
| augustus-8-processed-gene-158.35-mRNA-1 | NA | NA       | Kinase-LRR-TM | Os08g0342300 | OsR498G0815837200.01.T01 | Brassinosteroid LRR receptor kinase BRL3                                 |
| augustus-8-processed-gene-159.31-mRNA-1 | NA | Japonica |               | Os08g0343600 | OsR498G0815843000.01.T01 | Reticuline oxidase                                                       |
| augustus-8-processed-gene-160.19-mRNA-1 | NA | Japonica |               | Os08g0345500 | OsR498G0815848400.01.T01 | Cellulose synthase A                                                     |
| augustus-8-processed-gene-170.30-mRNA-1 | NA | Japonica |               | Os08g0474800 | OsR498G0917625500.01.T01 | Tuliposide A-converting enzyme 2, chloroplastic                          |
| augustus-8-processed-gene-170.31-mRNA-1 | NA | NA       |               |              |                          | EF-hand domain-containing protein                                        |
| augustus-8-processed-gene-174.6-mRNA-1  | NA | NA       |               |              |                          | Endonuclease                                                             |
| augustus-8-processed-gene-178.24-mRNA-1 | NA | NA       |               | 0            | OsR498G0510208000.01.T01 | HGWP repeat containing protein-like                                      |
| augustus-8-processed-gene-178.25-mRNA-1 | NA | NA       |               | 0            | OsR498G0510208000.01.T01 | HGWP repeat containing protein-like                                      |
| augustus-8-processed-gene-178.26-mRNA-1 | NA | NA       |               | 0            | OsR498G0510208000.01.T01 | HGWP repeat containing protein-like                                      |
| augustus-8-processed-gene-182.18-mRNA-1 | NA | NA       |               | 0            | OsR498G0101349400.01.T01 | Splicing coactivator subunit-like                                        |
| augustus-8-processed-gene-189.5-mRNA-1  | NA | NA       | NBS-TM        | Os08g0373400 |                          | CC-NBS-LRR type disease resistance protein NLR1-V                        |
| augustus-8-processed-gene-19.45-mRNA-1  | NA | NA       |               |              |                          | rRNA N-glycosidase                                                       |
| augustus-8-processed-gene-199.43-mRNA-1 | NA | NA       |               | Os08g0390200 | OsR498G0815994400.01.T01 | Oxidoreductase, 2OG-Fe oxygenase family protein, expressed               |
| augustus-8-processed-gene-199.46-mRNA-1 | NA | Indica   |               | Os08g0392100 | OsR498G0815995400.01.T01 | Oxidoreductase, 2OG-Fe oxygenase family protein, expressed               |
| augustus-8-processed-gene-199.51-mRNA-1 | NA | NA       |               | Os08g0392100 | OsR498G0815999400.01.T01 | Oxidoreductase, 2OG-Fe oxygenase family protein, expressed               |
| augustus-8-processed-gene-202.13-mRNA-1 | NA | NA       |               |              |                          |                                                                          |
| augustus-8-processed-gene-208.35-mRNA-1 | NA | NA       |               | 0            | OsR498G0204046800.01.T01 | Circumsporozoite protein-like                                            |
| augustus-8-processed-gene-211.45-mRNA-1 | NA | NA       |               | Os08g0414500 | OsR498G0816081800.01.T01 | BHLH domain-containing protein                                           |
| augustus-8-processed-gene-226.16-mRNA-1 | NA | NA       |               | Os08g0438400 | OsR498G0816166000.01.T06 | ZF-HD dimerization-type domain-containing protein (Fragment)             |
| augustus-8-processed-gene-249.26-mRNA-1 | NA | NA       |               | Os08g0479400 | OsR498G0816316600.01.T02 | Zinc-finger homeodomain protein 2                                        |
| augustus-8-processed-gene-250.16-mRNA-1 | NA | NA       |               | Os08g0480100 | OsR498G0816319800.01.T04 | Signal recognition particle receptor subunit alpha like                  |
| augustus-8-processed-gene-254.33-mRNA-1 | NA | NA       |               | Os08g0487500 | OsR498G0816351000.01.T01 | Ubiquitin-protein ligase CIP8                                            |
| augustus-8-processed-gene-254.36-mRNA-1 | NA | Japonica |               | Os08g0488800 | OsR498G0816354000.01.T03 | Glycosyltransferase                                                      |
| augustus-8-processed-gene-255.27-mRNA-1 | NA | NA       |               | Os08g0490300 | OsR498G0816360800.01.T03 | RRM domain-containing protein (Fragment)                                 |
| augustus-8-processed-gene-255.9-mRNA-1  | NA | NA       |               | Os08g0489800 | OsR498G0816358000.01.T01 | Phosphatidylinositol 4-kinase type 2-alpha                               |
| augustus-8-processed-gene-256.40-mRNA-1 | NA | NA       |               | Os08g0492500 | OsR498G0816368200.01.T01 | RING E3 ubiquitin ligase                                                 |
| augustus-8-processed-gene-257.7-mRNA-1  | NA | NA       |               | Os08g0494000 | OsR498G0816373000.01.T01 | Harpin-induced protein                                                   |
| augustus-8-processed-gene-258.52-mRNA-1 | NA | NA       |               | Os08g0497300 | OsR498G0816388500.01.T02 | Phosphatidylinositol/phosphatidylcholine transfer protein SFH13          |
| augustus-8-processed-gene-258.57-mRNA-1 | NA | Indica   |               | Os08g0499400 | OsR498G0816384400.01.T01 | DNA-directed RNA polymerase                                              |
| augustus-8-processed-gene-258.59-mRNA-1 | NA | NA       |               | Os10g0460000 | OsR498G0204348500.01.T01 |                                                                          |
| augustus-8-processed-gene-258.61-mRNA-1 | NA | NA       |               | Os04g0504700 | OsR498G0204529200.01.T01 | Putative non-LTR retroelement reverse transcriptase                      |
| augustus-8-processed-gene-259.30-mRNA-1 | NA | NA       |               | Os08g0499000 | OsR498G0816393800.01.T02 | Caffeoyl-CoA O-methyltransferase 2                                       |
| augustus-8-processed-gene-26.25-mRNA-1  | NA | NA       |               | Os09g0120033 | OsR498G0202840400.01.T01 |                                                                          |
| augustus-8-processed-gene-261.46-mRNA-1 | NA | NA       |               | Os08g0502400 | OsR498G0816408800.01.T01 | Fasciclin-like arabinogalactan protein 7                                 |
| augustus-8-processed-gene-268.20-mRNA-1 | NA | NA       |               | Os08g0515000 |                          | Sulfotransferase                                                         |
| augustus-8-processed-gene-270.36-mRNA-1 | NA | NA       |               | Os08g0517600 | OsR498G0816467200.01.T04 | S-adenosyl-L-methionine-dependent methyltransferases superfamily protein |
| augustus-8-processed-gene-270.53-mRNA-1 | NA | NA       |               | 0            | OsR498G0816472700.01.T01 |                                                                          |
| augustus-8-processed-gene-271.3-mRNA-1  | NA | Japonica |               | Os08g0519300 | OsR498G1120763500.01.T01 | Xylanase inhibitor protein I                                             |
| augustus-8-processed-gene-274.53-mRNA-1 | NA | Japonica |               | Os08g0526100 | OsR498G0917763200.01.T01 | UDP-D-glucuronate 4-epimerase 6                                          |
| augustus-8-processed-gene-276.57-mRNA-1 | NA | NA       |               | Os08g0529300 | OsR498G0816511900.01.T01 | F-box protein interaction domain containing protein                      |
| augustus-8-processed-gene-279.18-mRNA-1 | NA | NA       |               | Os03g0110200 | OsR498G0101158000.01.T01 | Transposon protein, putative, Mutator sub-class, expressed               |
| augustus-8-processed-gene-295.27-mRNA-1 | NA | NA       |               | 0            | OsR498G0815070000.01.T01 | Retrotransposon protein, putative, unclassified, expressed               |
| augustus-8-processed-gene-295.4-mRNA-1  | NA | NA       |               | Os08g0560900 | OsR498G0816613600.01.T02 | Photosystem I reaction centre PSI-D subunit                              |
| augustus-8-processed-gene-33.32-mRNA-1  | NA | NA       |               | 0            | OsR498G0815213000.01.T01 |                                                                          |

|                                         |    |          |               |              |                          |                                                                              |
|-----------------------------------------|----|----------|---------------|--------------|--------------------------|------------------------------------------------------------------------------|
| augustus-8-processed-gene-37.1-mRNA-1   | NA | NA       |               | Os08g0159700 | OsR498G0815240000.01.T01 | AT-hook motif nuclear-localized protein 21                                   |
| augustus-8-processed-gene-39.73-mRNA-1  | NA | Indica   |               | Os08g0163300 | OsR498G0815255400.01.T02 | Delta DNA polymerase                                                         |
| augustus-8-processed-gene-39.74-mRNA-1  | NA | NA       |               | Os08g0163600 |                          | Late embryogenesis abundant protein                                          |
| augustus-8-processed-gene-43.33-mRNA-1  | NA | NA       |               | Os08g0170400 |                          |                                                                              |
| augustus-8-processed-gene-43.37-mRNA-1  | NA | Indica   |               | Os08g0170100 | OsR498G0815282400.01.T01 | Mitochondrial import inner membrane translocase subunit                      |
| augustus-8-processed-gene-43.39-mRNA-1  | NA | NA       | NBS-TM        |              |                          | Disease resistance protein RPP13                                             |
| augustus-8-processed-gene-69.12-mRNA-1  | NA | NA       |               | 0            | OsR498G0815440800.01.T01 |                                                                              |
| augustus-8-processed-gene-69.15-mRNA-1  | NA | Japonica |               | Os08g0214900 | OsR498G0815441600.01.T01 |                                                                              |
| augustus-8-processed-gene-71.4-mRNA-1   | NA | NA       |               | 0            | OsR498G0815440800.01.T01 |                                                                              |
| augustus-8-processed-gene-75.17-mRNA-1  | NA | NA       |               | Os03g0110200 |                          | Transposon protein, putative, Mutator sub-class, expressed                   |
| augustus-8-processed-gene-79.5-mRNA-1   | NA | NA       | CC-LRR-NBS-TM | Os08g0224000 | OsR498G0815462000.01.T01 | Putative P-loop containing nucleoside triphosphate hydrolase, leucine-rich r |
| augustus-8-processed-gene-82.24-mRNA-1  | NA | NA       |               | Os08g0229701 |                          |                                                                              |
| augustus-8-processed-gene-86.28-mRNA-1  | NA | Japonica | CC-Kinase-TM  | Os08g0230800 | OsR498G0815488100.01.T01 | Non-specific serine/threonine protein kinase                                 |
| augustus-8-processed-gene-94.15-mRNA-1  | NA | NA       |               | Os08g0249200 |                          | Glutamine dumper 3                                                           |
| augustus-8-processed-gene-95.18-mRNA-1  | NA | NA       |               | Os07g0251301 |                          | 60S acidic ribosomal protein P1-alpha                                        |
| augustus-8-processed-gene-99.30-mRNA-1  | NA | NA       | NBS-TM        | Os08g0258700 | OsR498G0815569000.01.T01 | Nucleotide-binding leucine-rich-repeat protein 1                             |
| augustus-9-processed-gene-0.0-mRNA-1    | NA | NA       |               | 0            | OsR498G1017992100.01.T01 |                                                                              |
| augustus-9-processed-gene-0.10-mRNA-1   | NA | NA       |               | 0            | OsR498G1017992100.01.T01 |                                                                              |
| augustus-9-processed-gene-0.12-mRNA-1   | NA | NA       |               | 0            | OsR498G1017992100.01.T01 |                                                                              |
| augustus-9-processed-gene-0.14-mRNA-1   | NA | NA       |               | 0            | OsR498G1017992100.01.T01 |                                                                              |
| augustus-9-processed-gene-0.2-mRNA-1    | NA | NA       |               | 0            | OsR498G1017992100.01.T01 |                                                                              |
| augustus-9-processed-gene-0.4-mRNA-1    | NA | NA       |               | 0            | OsR498G1017992100.01.T01 |                                                                              |
| augustus-9-processed-gene-0.6-mRNA-1    | NA | NA       |               | 0            | OsR498G1017992100.01.T01 |                                                                              |
| augustus-9-processed-gene-0.8-mRNA-1    | NA | NA       |               | 0            | OsR498G1017992100.01.T01 |                                                                              |
| augustus-9-processed-gene-100.30-mRNA-1 | NA | NA       |               | Os09g0329700 | OsR498G0917168200.01.T01 | Glycosyltransferase                                                          |
| augustus-9-processed-gene-100.32-mRNA-1 | NA | NA       |               | Os09g0330200 |                          |                                                                              |
| augustus-9-processed-gene-114.38-mRNA-1 | NA | NA       |               |              |                          | Transposon protein, putative, Mutator sub-class, expressed                   |
| augustus-9-processed-gene-116.37-mRNA-1 | NA | Japonica |               | Os09g0357500 | OsR498G0815285000.01.T01 | Disease resistance protein RPM1                                              |
| augustus-9-processed-gene-126.24-mRNA-1 | NA | Japonica | Kinase        | Os09g0373800 | OsR498G0917660800.01.T02 | Putative wall-associated kinase 4                                            |
| augustus-9-processed-gene-126.25-mRNA-1 | NA | NA       | Kinase-TM     |              |                          | Wall-associated receptor kinase 2                                            |
| augustus-9-processed-gene-133.16-mRNA-1 | NA | NA       |               | Os02g0163901 |                          | Retrotransposon protein, putative, unclassified                              |
| augustus-9-processed-gene-133.2-mRNA-1  | NA | NA       |               |              |                          | Zinc finger transcription factor                                             |
| augustus-9-processed-gene-133.6-mRNA-1  | NA | NA       |               | 0            | OsR498G0917342000.01.T01 | AUGMIN subunit like                                                          |
| augustus-9-processed-gene-14.23-mRNA-1  | NA | NA       |               | 0            | OsR498G0916698000.01.T01 | Agamous-like MADS-box protein AGL161                                         |
| augustus-9-processed-gene-142.22-mRNA-1 | NA | NA       |               |              |                          | 1-phosphatidylinositol-3-phosphate 5-kinase                                  |
| augustus-9-processed-gene-143.5-mRNA-1  | NA | NA       |               | 0            | OsR498G0917415600.01.T01 |                                                                              |
| augustus-9-processed-gene-144.27-mRNA-1 | NA | NA       |               | Os09g0404900 | OsR498G0917419800.01.T01 |                                                                              |
| augustus-9-processed-gene-17.15-mRNA-1  | NA | NA       |               | Os09g0119600 | OsR498G0916710400.01.T01 | Glycosyltransferase                                                          |
| augustus-9-processed-gene-17.17-mRNA-1  | NA | NA       |               |              |                          |                                                                              |
| augustus-9-processed-gene-183.44-mRNA-1 | NA | NA       |               | Os09g0476100 | OsR498G0917679000.01.T03 | Cleavage and polyadenylation specificity factor subunit 6-like               |
| augustus-9-processed-gene-184.19-mRNA-1 | NA | NA       |               | Os09g0479300 | OsR498G0917690900.01.T01 | Heavy metal-associated isoprenylated plant protein 41 isoform B              |
| augustus-9-processed-gene-185.20-mRNA-1 | NA | NA       |               | Os09g0480400 | OsR498G0917694500.01.T01 | Putative galacturonosyltransferase 4                                         |
| augustus-9-processed-gene-196.63-mRNA-1 | NA | NA       |               | Os07g0513300 |                          | Transposon protein, putative, Mutator sub-class                              |
| augustus-9-processed-gene-207.21-mRNA-1 | NA | NA       |               | Os09g0526800 | OsR498G0917831800.01.T01 | LRAT domain-containing protein (Fragment)                                    |
| augustus-9-processed-gene-215.21-mRNA-1 | NA | NA       |               | Os09g0542800 | OsR498G0917890000.01.T03 | Pentatricopeptide repeat-containing protein mitochondrial                    |
| augustus-9-processed-gene-217.23-mRNA-1 | NA | Indica   |               | Os09g0546800 | OsR498G0917902400.01.T01 | Auxin-responsive protein SAUR36                                              |
| augustus-9-processed-gene-217.54-mRNA-1 | NA | NA       |               | Os09g0546800 | OsR498G0917905600.01.T01 | Auxin-responsive protein SAUR36                                              |
| augustus-9-processed-gene-217.56-mRNA-1 | NA | NA       |               | Os09g0547000 | OsR498G0917906000.01.T01 | Auxin-responsive protein SAUR36                                              |
| augustus-9-processed-gene-217.57-mRNA-1 | NA | Indica   |               | Os09g0545700 | OsR498G0917906200.01.T01 | Auxin-responsive protein SAUR36-like                                         |
| augustus-9-processed-gene-3.30-mRNA-1   | NA | NA       |               | Os08g0381000 | OsR498G0510193500.01.T01 | Cell wall protein-like                                                       |
| augustus-9-processed-gene-30.29-mRNA-1  | NA | NA       |               | Os09g0135800 | OsR498G0916770000.01.T01 | protein CELLULOSE SYNTHASE INTERACTIVE 1-like                                |
| augustus-9-processed-gene-37.20-mRNA-1  | NA | NA       |               | 0            | OsR498G0916799200.01.T01 | chromatin target of PRMT1 protein isoform X2                                 |
| augustus-9-processed-gene-41.25-mRNA-1  | NA | NA       |               |              |                          | Auxin transport protein BIG                                                  |
| augustus-9-processed-gene-58.13-mRNA-1  | NA | NA       |               |              |                          | Transposon protein, putative, Mutator sub-class                              |
| augustus-9-processed-gene-71.13-mRNA-1  | NA | NA       |               | Os09g0336500 | OsR498G1220975100.01.T01 | Zinc knuckle family protein                                                  |
| augustus-9-processed-gene-71.15-mRNA-1  | NA | NA       |               | 0            | OsR498G1018968000.01.T01 | ATP-dependent DNA helicase                                                   |
| augustus-9-processed-gene-87.14-mRNA-1  | NA | NA       |               |              |                          | Endonuclease                                                                 |
| augustus-9-processed-gene-87.17-mRNA-1  | NA | NA       |               | Os09g0309700 | OsR498G0917062600.01.T03 | AP2 domain-containing transcription factor-like protein                      |
| augustus-9-processed-gene-88.4-mRNA-1   | NA | NA       |               | Os09g0314333 | OsR498G0917083400.01.T01 | GDP-mannose transporter GONST4                                               |
| augustus-9-processed-gene-88.5-mRNA-1   | NA | NA       |               | Os09g0314400 | OsR498G0917084400.01.T01 | Serine/threonine protein phosphatase                                         |
| augustus-9-processed-gene-89.34-mRNA-1  | NA | NA       |               | Os09g0317700 | OsR498G0917110200.01.T01 | NAM-associated domain-containing protein                                     |

|                                                |    |          |        |              |                          |                                                                          |
|------------------------------------------------|----|----------|--------|--------------|--------------------------|--------------------------------------------------------------------------|
| augustus-9-processed-gene-97.26-mRNA-1         | NA | NA       |        | Os02g0163901 |                          | Retrotransposon protein, putative, unclassified                          |
| augustus_masked-1-processed-gene-104.40-mRNA-1 | NA | NA       |        | Os08g0381000 | OsR498G0510190000.01.T01 | Cell wall protein-like                                                   |
| augustus_masked-1-processed-gene-108.50-mRNA-1 | NA | NA       |        | 0            | OsR498G0511427100.01.T01 | Epstein-Barr virus EBNA-1-like                                           |
| augustus_masked-1-processed-gene-109.35-mRNA-1 | NA | NA       |        | 0            | OsR498G0101531300.01.T01 | Transposon protein, putative, CACTA, En/Spm sub-class                    |
| augustus_masked-1-processed-gene-11.28-mRNA-1  | NA | NA       |        | Os01g0120700 | OsR498G0100066200.01.T03 | Histidine-rich calcium-binding protein                                   |
| augustus_masked-1-processed-gene-12.2-mRNA-1   | NA | Indica   |        | Os01g0121500 | OsR498G0100070800.01.T01 | Ig-like domain-containing protein                                        |
| augustus_masked-1-processed-gene-12.3-mRNA-1   | NA | NA       |        | Os01g0121600 |                          | ABC transporter G family member 7 (Fragment)                             |
| augustus_masked-1-processed-gene-12.30-mRNA-1  | NA | NA       |        | 0            | OsR498G0100073600.01.T01 | RNA binding protein                                                      |
| augustus_masked-1-processed-gene-121.40-mRNA-1 | NA | NA       |        | Os07g0433200 | OsR498G0510328900.01.T01 | Retrotransposon protein, putative, Ty1-copia subclass                    |
| augustus_masked-1-processed-gene-13.29-mRNA-1  | NA | NA       |        | Os01g0124100 | OsR498G0100081000.01.T01 | Putative Bowman Birk trypsin inhibitor                                   |
| augustus_masked-1-processed-gene-13.30-mRNA-1  | NA | NA       |        | Os01g0124200 | OsR498G0100081600.01.T01 | Putative Bowman Birk trypsin inhibitor                                   |
| augustus_masked-1-processed-gene-13.31-mRNA-1  | NA | NA       |        | Os01g0124400 | OsR498G0100081800.01.T01 | Putative Bowman Birk trypsin inhibitor                                   |
| augustus_masked-1-processed-gene-13.9-mRNA-1   | NA | NA       |        | Os01g0123900 | OsR498G0100080200.01.T02 | Putative Bowman Birk trypsin inhibitor                                   |
| augustus_masked-1-processed-gene-137.26-mRNA-1 | NA | Japonica |        | Os01g0343900 | OsR498G0509881000.01.T01 | Hydroxyproline-rich glycoprotein-like                                    |
| augustus_masked-1-processed-gene-14.23-mRNA-1  | NA | NA       |        | 0            | OsR498G0204301000.01.T01 | Transposon protein, putative, CACTA, En/Spm sub-class                    |
| augustus_masked-1-processed-gene-15.20-mRNA-1  | NA | NA       |        | Os01g0128300 | OsR498G0100094800.01.T02 | Protein ABA DEFICIENT 4 chloroplastic                                    |
| augustus_masked-1-processed-gene-159.27-mRNA-1 | NA | NA       |        |              |                          |                                                                          |
| augustus_masked-1-processed-gene-191.39-mRNA-1 | NA | NA       |        | Os01g0519100 | OsR498G0101126800.01.T04 | F-box domain-containing protein (Fragment)                               |
| augustus_masked-1-processed-gene-204.16-mRNA-1 | NA | NA       |        | Os08g0422500 |                          |                                                                          |
| augustus_masked-1-processed-gene-21.64-mRNA-1  | NA | NA       |        | Os01g0139900 | OsR498G0100139600.01.T02 |                                                                          |
| augustus_masked-1-processed-gene-210.47-mRNA-1 | NA | NA       |        | Os01g0546500 |                          | Pentatricopeptide repeat                                                 |
| augustus_masked-1-processed-gene-210.48-mRNA-1 | NA | Japonica |        | Os01g0546800 | OsR498G0102290100.01.T01 | Pectate lyase                                                            |
| augustus_masked-1-processed-gene-211.12-mRNA-1 | NA | NA       |        | Os02g0212975 | OsR498G0305421900.01.T01 |                                                                          |
| augustus_masked-1-processed-gene-211.8-mRNA-1  | NA | NA       |        | 0            | OsR498G0204658700.01.T03 | Ribosomal protein-like                                                   |
| augustus_masked-1-processed-gene-212.31-mRNA-1 | NA | Indica   |        | Os09g0292400 | OsR498G0101272200.01.T01 | Transposon protein, putative, CACTA, En/Spm sub-class                    |
| augustus_masked-1-processed-gene-212.43-mRNA-1 | NA | NA       |        | 0            | OsR498G0101278200.01.T01 |                                                                          |
| augustus_masked-1-processed-gene-213.4-mRNA-1  | NA | NA       |        | Os01g0550000 | OsR498G0101278700.01.T04 | DEAD-box ATP-dependent RNA helicase 15                                   |
| augustus_masked-1-processed-gene-217.12-mRNA-1 | NA | NA       |        | 0            | OsR498G0101315000.01.T01 |                                                                          |
| augustus_masked-1-processed-gene-222.25-mRNA-1 | NA | NA       |        | Os01g0564600 |                          | Cell wall protein-like                                                   |
| augustus_masked-1-processed-gene-240.58-mRNA-1 | NA | NA       |        | 0            | OsR498G0101459400.01.T01 |                                                                          |
| augustus_masked-1-processed-gene-243.21-mRNA-1 | NA | NA       |        |              |                          | DUF1618 domain-containing protein (Fragment)                             |
| augustus_masked-1-processed-gene-243.7-mRNA-1  | NA | NA       |        | 0            | OsR498G0101475600.01.T01 | Phosphoribosyl-AMP cyclohydrolase                                        |
| augustus_masked-1-processed-gene-245.13-mRNA-1 | NA | NA       |        | Os01g0604500 | OsR498G0101494400.01.T03 | Probable calcium-binding protein CML14                                   |
| augustus_masked-1-processed-gene-245.40-mRNA-1 | NA | Japonica |        | Os01g0606100 | OsR498G0101500000.01.T01 |                                                                          |
| augustus_masked-1-processed-gene-250.40-mRNA-1 | NA | Indica   |        | Os05g0468700 | OsR498G0101534400.01.T01 | Ammonium transporter                                                     |
| augustus_masked-1-processed-gene-250.64-mRNA-1 | NA | NA       |        | Os01g0614500 | OsR498G0101538800.01.T03 | UBP1-associated protein 2C isoform A                                     |
| augustus_masked-1-processed-gene-251.5-mRNA-1  | NA | NA       | NBS-TM | Os01g0615500 | OsR498G0101542000.01.T01 | ATPase, coupled to transmembrane movement of substances                  |
| augustus_masked-1-processed-gene-252.18-mRNA-1 | NA | NA       |        | Os01g0617600 | OsR498G0101550000.01.T03 | PORR domain-containing protein (Fragment)                                |
| augustus_masked-1-processed-gene-254.25-mRNA-1 | NA | Japonica |        | Os01g0620300 | OsR498G0101559000.01.T01 | Glycosyltransferase                                                      |
| augustus_masked-1-processed-gene-254.41-mRNA-1 | NA | NA       |        | 0            | OsR498G1119902800.01.T01 | Retrotransposon protein, putative, unclassified, expressed               |
| augustus_masked-1-processed-gene-255.17-mRNA-1 | NA | NA       | LRR-TM | 0            | OsR498G0101567200.01.T01 | Protein TOO MANY MOUTHS like                                             |
| augustus_masked-1-processed-gene-256.41-mRNA-1 | NA | Japonica |        | Os01g0625900 | OsR498G0511414500.01.T01 | Transcription repressor                                                  |
| augustus_masked-1-processed-gene-257.24-mRNA-1 | NA | NA       |        | Os01g0626900 | OsR498G0101580000.01.T02 | Transcription factor bHLH144                                             |
| augustus_masked-1-processed-gene-259.49-mRNA-1 | NA | NA       |        | Os01g0630300 | OsR498G0101589400.01.T01 | BHLH domain-containing protein                                           |
| augustus_masked-1-processed-gene-268.38-mRNA-1 | NA | NA       |        | Os01g0647800 | OsR498G0101650800.01.T02 |                                                                          |
| augustus_masked-1-processed-gene-27.10-mRNA-1  | NA | NA       |        | 0            | OsR498G0100176600.01.T01 |                                                                          |
| augustus_masked-1-processed-gene-276.15-mRNA-1 | NA | Indica   |        | Os01g0660800 | OsR498G0101697800.01.T01 | Werner syndrome ATP-dependent helicase                                   |
| augustus_masked-1-processed-gene-28.63-mRNA-1  | NA | NA       |        | Os01g0152950 | OsR498G0100190400.01.T01 | F-box domain-containing protein                                          |
| augustus_masked-1-processed-gene-29.15-mRNA-1  | NA | Japonica |        | Os01g0153200 | OsR498G0100191600.01.T05 | Pentatricopeptide repeat                                                 |
| augustus_masked-1-processed-gene-31.6-mRNA-1   | NA | Indica   |        | Os02g0144200 | OsR498G0100207000.01.T01 | Arginyl-tRNA synthetase                                                  |
| augustus_masked-1-processed-gene-336.52-mRNA-1 | NA | NA       |        | Os01g0777500 | OsR498G0102092400.01.T04 | Inositol hexakisphosphate and diphosphoinositol-pentakisphosphate kinase |
| augustus_masked-1-processed-gene-350.13-mRNA-1 | NA | NA       |        | 0            | OsR498G0102184300.01.T01 | Anaphase-promoting complex subunit 5                                     |
| augustus_masked-1-processed-gene-36.28-mRNA-1  | NA | NA       |        | Os01g0170900 | OsR498G0100238200.01.T01 |                                                                          |
| augustus_masked-1-processed-gene-365.44-mRNA-1 | NA | NA       |        | Os01g0835600 | OsR498G0102284000.01.T03 | Dirigent protein 17                                                      |
| augustus_masked-1-processed-gene-368.38-mRNA-1 | NA | NA       |        | Os01g0841100 | OsR498G0102308200.01.T01 | Fasciclin-like arabinogalactan protein 4                                 |
| augustus_masked-1-processed-gene-370.13-mRNA-1 | NA | Indica   |        | Os10g0447400 | OsR498G0102316200.01.T01 |                                                                          |
| augustus_masked-1-processed-gene-370.29-mRNA-1 | NA | NA       |        | Os01g0844500 |                          | Aspartic proteinase nepenthesin-2                                        |
| augustus_masked-1-processed-gene-372.35-mRNA-1 | NA | NA       |        | Os01g0848300 | OsR498G0102331600.01.T02 | Chlororespiratory reduction 2                                            |
| augustus_masked-1-processed-gene-372.51-mRNA-1 | NA | NA       |        | Os01g0848550 | OsR498G0102333400.01.T01 |                                                                          |
| augustus_masked-1-processed-gene-372.53-mRNA-1 | NA | NA       |        | 0            | OsR498G1120536600.01.T01 |                                                                          |
| augustus_masked-1-processed-gene-373.43-mRNA-1 | NA | NA       |        | Os01g0850200 | OsR498G0102339200.01.T01 | RING-CH-type domain-containing protein (Fragment)                        |



|                                                |    |        |        |              |                          |                                                                           |
|------------------------------------------------|----|--------|--------|--------------|--------------------------|---------------------------------------------------------------------------|
| augustus_masked-1-processed-gene-374.22-mRNA-1 | NA | NA     |        | Os01g0852400 | OsR498G0102347000.01.T01 | UPF0503 protein chloroplastic                                             |
| augustus_masked-1-processed-gene-374.25-mRNA-1 | NA | NA     |        | 0            | OsR498G0102349400.01.T01 |                                                                           |
| augustus_masked-1-processed-gene-375.28-mRNA-1 | NA | NA     |        | 0            | OsR498G0102355600.01.T01 |                                                                           |
| augustus_masked-1-processed-gene-376.15-mRNA-1 | NA | NA     |        | Os01g0855600 | OsR498G0102361800.01.T01 | Nematode resistance protein like                                          |
| augustus_masked-1-processed-gene-377.24-mRNA-1 | NA | NA     |        | Os01g0858350 | OsR498G0102370800.01.T01 |                                                                           |
| augustus_masked-1-processed-gene-378.18-mRNA-1 | NA | NA     |        | Os01g0859500 | OsR498G0102377800.01.T05 | Transcription factor LG2                                                  |
| augustus_masked-1-processed-gene-378.21-mRNA-1 | NA | NA     |        | Os01g0859600 |                          | F-box/LRR-repeat protein At1g67190                                        |
| augustus_masked-1-processed-gene-379.31-mRNA-1 | NA | NA     |        | 0            | OsR498G0102381200.01.T01 |                                                                           |
| augustus_masked-1-processed-gene-381.41-mRNA-1 | NA | NA     |        | 0            | OsR498G0102392900.01.T01 |                                                                           |
| augustus_masked-1-processed-gene-381.70-mRNA-1 | NA | NA     |        | Os01g0865400 | OsR498G0102395800.01.T01 | Anthocyanidin 3-O-glucosyltransferase                                     |
| augustus_masked-1-processed-gene-381.71-mRNA-1 | NA | NA     |        | Os01g0865700 | OsR498G0102396600.01.T01 | RING-type E3 ubiquitin transferase                                        |
| augustus_masked-1-processed-gene-381.72-mRNA-1 | NA | NA     |        | Os01g0865800 | OsR498G0102397600.01.T01 | Dof-type domain-containing protein (Fragment)                             |
| augustus_masked-1-processed-gene-385.68-mRNA-1 | NA | Indica |        | Os05g0430800 | OsR498G0102423600.01.T01 | Amidophosphoribosyltransferase                                            |
| augustus_masked-1-processed-gene-388.7-mRNA-1  | NA | NA     |        | Os01g0877900 | OsR498G0102444400.01.T01 |                                                                           |
| augustus_masked-1-processed-gene-389.45-mRNA-1 | NA | NA     |        | Os01g0881100 | OsR498G0102455600.01.T01 | ENTH domain-containing protein (Fragment)                                 |
| augustus_masked-1-processed-gene-390.44-mRNA-1 | NA | NA     |        | Os10g0566201 | OsR498G1019217100.01.T01 | DOG1 domain-containing protein                                            |
| augustus_masked-1-processed-gene-391.49-mRNA-1 | NA | NA     |        | Os01g0885200 | OsR498G0102471600.01.T01 | Putative G protein-coupled receptor                                       |
| augustus_masked-1-processed-gene-393.24-mRNA-1 | NA | Indica |        | Os01g0888500 | OsR498G0102484600.01.T02 | Formylglycinamide ribonucleotide amidotransferase                         |
| augustus_masked-1-processed-gene-393.6-mRNA-1  | NA | NA     |        | 0            | OsR498G0102482400.01.T01 |                                                                           |
| augustus_masked-1-processed-gene-402.44-mRNA-1 | NA | NA     |        | 0            | OsR498G0713388900.01.T02 |                                                                           |
| augustus_masked-1-processed-gene-402.71-mRNA-1 | NA | NA     |        | Os01g0623900 | OsR498G0101572500.01.T01 |                                                                           |
| augustus_masked-1-processed-gene-403.43-mRNA-1 | NA | NA     |        | Os01g0621900 | OsR498G0101564900.01.T01 | Cell wall protein AWA1-like                                               |
| augustus_masked-1-processed-gene-404.20-mRNA-1 | NA | NA     |        | Os01g0620800 | OsR498G0101560500.01.T01 | Glycosyltransferase                                                       |
| augustus_masked-1-processed-gene-406.62-mRNA-1 | NA | NA     |        | Os01g0616800 | OsR498G0101547500.01.T01 | FAD-binding PCMH-type domain-containing protein                           |
| augustus_masked-1-processed-gene-407.5-mRNA-1  | NA | NA     |        | Os01g0616600 | OsR498G0101546700.01.T01 | Membrane-associated salt-inducible                                        |
| augustus_masked-1-processed-gene-412.43-mRNA-1 | NA | Indica |        | Os01g0607800 | OsR498G0101506700.01.T01 | Pentatricopeptide repeat-containing protein                               |
| augustus_masked-1-processed-gene-412.57-mRNA-1 | NA | NA     |        | Os01g0607300 | OsR498G0101503900.01.T02 | Ubiquitin-like domain-containing protein                                  |
| augustus_masked-1-processed-gene-412.60-mRNA-1 | NA | NA     |        | 0            | OsR498G0101503100.01.T01 |                                                                           |
| augustus_masked-1-processed-gene-412.63-mRNA-1 | NA | NA     |        | Os01g0607000 | OsR498G0101502500.01.T01 | Zinc finger domain-containing CCHC-type                                   |
| augustus_masked-1-processed-gene-413.35-mRNA-1 | NA | NA     |        | Os01g0604600 |                          |                                                                           |
| augustus_masked-1-processed-gene-414.8-mRNA-1  | NA | Indica |        | Os01g0604300 | OsR498G0101493300.01.T01 | F-box domain-containing protein (Fragment)                                |
| augustus_masked-1-processed-gene-415.18-mRNA-1 | NA | NA     |        | Os01g0600900 | OsR498G0101476300.01.T01 | Chlorophyll a-b binding protein, chloroplastic                            |
| augustus_masked-1-processed-gene-416.35-mRNA-1 | NA | NA     |        |              |                          | pentatricopeptide repeat-containing protein At3g24000, mitochondrial-like |
| augustus_masked-1-processed-gene-416.62-mRNA-1 | NA | NA     |        | Os01g0598600 | OsR498G0101471900.01.T01 | Peptidase A1 domain-containing protein (Fragment)                         |
| augustus_masked-1-processed-gene-417.28-mRNA-1 | NA | NA     |        | Os07g0433200 | OsR498G0510328900.01.T01 | Retrotransposon protein, putative, Ty1-copia subclass                     |
| augustus_masked-1-processed-gene-417.5-mRNA-1  | NA | NA     |        | Os01g0597800 | OsR498G0101469300.01.T01 | Glycosyltransferase                                                       |
| augustus_masked-1-processed-gene-418.57-mRNA-1 | NA | Indica | LRR-TM | Os01g0594300 | OsR498G0101457300.01.T01 | Leucine-rich repeat extensin-like protein 3                               |
| augustus_masked-1-processed-gene-419.7-mRNA-1  | NA | NA     |        | 0            | OsR498G0407856300.01.T01 | HGWP repeat containing protein-like                                       |
| augustus_masked-1-processed-gene-420.6-mRNA-1  | NA | NA     |        | Os01g0841100 | OsR498G0102308200.01.T01 | Fasciclin-like arabinogalactan protein 4                                  |
| augustus_masked-1-processed-gene-421.26-mRNA-1 | NA | Indica |        | Os10g0447400 | OsR498G0102316200.01.T01 |                                                                           |
| augustus_masked-1-processed-gene-421.29-mRNA-1 | NA | NA     |        | Os01g0844500 |                          | Aspartic proteinase nepenthesin-2                                         |
| augustus_masked-1-processed-gene-423.54-mRNA-1 | NA | NA     |        | Os01g0848300 | OsR498G0102331600.01.T02 | Chlororespiratory reduction 2                                             |
| augustus_masked-1-processed-gene-423.56-mRNA-1 | NA | NA     |        | Os01g0848550 | OsR498G0102333400.01.T01 |                                                                           |
| augustus_masked-1-processed-gene-423.58-mRNA-1 | NA | NA     |        | 0            | OsR498G1120536600.01.T01 |                                                                           |
| augustus_masked-1-processed-gene-424.56-mRNA-1 | NA | NA     |        | Os01g0850200 | OsR498G0102339200.01.T01 | RING-CH-type domain-containing protein (Fragment)                         |
| augustus_masked-1-processed-gene-425.51-mRNA-1 | NA | NA     |        | Os01g0852400 | OsR498G0102347000.01.T01 | UPF0503 protein chloroplastic                                             |
| augustus_masked-1-processed-gene-426.10-mRNA-1 | NA | NA     |        | 0            | OsR498G0102349400.01.T01 |                                                                           |
| augustus_masked-1-processed-gene-426.29-mRNA-1 | NA | NA     |        | 0            | OsR498G0102355600.01.T01 |                                                                           |
| augustus_masked-1-processed-gene-427.18-mRNA-1 | NA | NA     |        | Os01g0855600 | OsR498G0102361800.01.T01 | Nematode resistance protein like                                          |
| augustus_masked-1-processed-gene-429.44-mRNA-1 | NA | NA     |        | Os01g0858350 | OsR498G0102370800.01.T01 |                                                                           |
| augustus_masked-1-processed-gene-430.2-mRNA-1  | NA | NA     |        | Os01g0859500 | OsR498G0102377800.01.T05 | Transcription factor LG2                                                  |
| augustus_masked-1-processed-gene-430.33-mRNA-1 | NA | NA     |        | 0            | OsR498G0102381200.01.T01 |                                                                           |
| augustus_masked-1-processed-gene-430.5-mRNA-1  | NA | NA     |        | Os01g0859600 |                          | F-box/LRR-repeat protein At1g67190                                        |
| augustus_masked-1-processed-gene-432.37-mRNA-1 | NA | NA     |        | 0            | OsR498G0102392900.01.T01 |                                                                           |
| augustus_masked-1-processed-gene-432.44-mRNA-1 | NA | NA     |        | Os01g0865400 | OsR498G0102395800.01.T01 | Anthocyanidin 3-O-glucosyltransferase                                     |
| augustus_masked-1-processed-gene-432.45-mRNA-1 | NA | NA     |        | Os01g0865700 | OsR498G0102396600.01.T01 | RING-type E3 ubiquitin transferase                                        |
| augustus_masked-1-processed-gene-432.46-mRNA-1 | NA | NA     |        | Os01g0865800 | OsR498G0102397600.01.T01 | Dof-type domain-containing protein (Fragment)                             |
| augustus_masked-1-processed-gene-436.34-mRNA-1 | NA | Indica |        | Os05g0430800 | OsR498G0102423600.01.T01 | Amidophosphoribosyltransferase                                            |
| augustus_masked-1-processed-gene-439.52-mRNA-1 | NA | NA     |        | Os01g0877900 | OsR498G0102444400.01.T01 |                                                                           |
| augustus_masked-1-processed-gene-440.25-mRNA-1 | NA | NA     |        | Os01g0881100 | OsR498G0102455600.01.T01 | ENTH domain-containing protein (Fragment)                                 |
| augustus_masked-1-processed-gene-441.34-mRNA-1 | NA | NA     |        | Os10g0566201 | OsR498G1019217100.01.T01 | DOG1 domain-containing protein                                            |

|                                                 |    |          |              |              |                          |                                                                           |
|-------------------------------------------------|----|----------|--------------|--------------|--------------------------|---------------------------------------------------------------------------|
| augustus_masked-1-processed-gene-444.17-mRNA-1  | NA | NA       |              | 0            | OsR498G0102482400.01.T01 |                                                                           |
| augustus_masked-1-processed-gene-444.18-mRNA-1  | NA | Indica   |              | Os01g0888500 | OsR498G0102484600.01.T02 | Formylglycinamide ribonucleotide amidotransferase                         |
| augustus_masked-1-processed-gene-45.33-mRNA-1   | NA | NA       |              | Os04g0185100 | OsR498G0407661200.01.T02 | CDT1 domain-containing protein                                            |
| augustus_masked-1-processed-gene-453.51-mRNA-1  | NA | NA       |              | 0            | OsR498G071338900.01.T02  |                                                                           |
| augustus_masked-1-processed-gene-454.33-mRNA-1  | NA | NA       |              | Os01g0623900 | OsR498G0101572500.01.T01 |                                                                           |
| augustus_masked-1-processed-gene-455.19-mRNA-1  | NA | NA       |              | Os01g0620800 | OsR498G0101560500.01.T01 | Glycosyltransferase                                                       |
| augustus_masked-1-processed-gene-455.4-mRNA-1   | NA | NA       |              | Os01g0621900 | OsR498G0101564900.01.T01 | Cell wall protein AWA1-like                                               |
| augustus_masked-1-processed-gene-458.33-mRNA-1  | NA | NA       |              | Os01g0616800 | OsR498G0101547500.01.T01 | FAD-binding PCMH-type domain-containing protein                           |
| augustus_masked-1-processed-gene-458.41-mRNA-1  | NA | NA       |              | Os01g0616600 | OsR498G0101546700.01.T01 | Membrane-associated salt-inducible                                        |
| augustus_masked-1-processed-gene-463.50-mRNA-1  | NA | Indica   |              | Os01g0607800 | OsR498G0101506700.01.T01 | Pentatricopeptide repeat-containing protein                               |
| augustus_masked-1-processed-gene-463.53-mRNA-1  | NA | NA       |              | Os01g0607300 | OsR498G0101503900.01.T02 | Ubiquitin-like domain-containing protein                                  |
| augustus_masked-1-processed-gene-463.56-mRNA-1  | NA | NA       |              | 0            | OsR498G0101503100.01.T01 |                                                                           |
| augustus_masked-1-processed-gene-464.34-mRNA-1  | NA | NA       |              | Os01g0607000 | OsR498G0101502500.01.T01 | Zinc finger domain-containing CCHC-type                                   |
| augustus_masked-1-processed-gene-465.28-mRNA-1  | NA | NA       |              | Os01g0604600 |                          |                                                                           |
| augustus_masked-1-processed-gene-465.31-mRNA-1  | NA | Indica   |              | Os01g0604300 | OsR498G0101493300.01.T01 | F-box domain-containing protein (Fragment)                                |
| augustus_masked-1-processed-gene-467.38-mRNA-1  | NA | NA       |              | Os01g0600900 | OsR498G0101476300.01.T01 | Chlorophyll a-b binding protein, chloroplastic                            |
| augustus_masked-1-processed-gene-467.39-mRNA-1  | NA | NA       |              |              |                          | pentatricopeptide repeat-containing protein At3g24000, mitochondrial-like |
| augustus_masked-1-processed-gene-467.65-mRNA-1  | NA | NA       |              | Os01g0598600 | OsR498G0101471900.01.T01 | Peptidase A1 domain-containing protein (Fragment)                         |
| augustus_masked-1-processed-gene-468.25-mRNA-1  | NA | NA       |              | Os01g0597800 | OsR498G0101469300.01.T01 | Glycosyltransferase                                                       |
| augustus_masked-1-processed-gene-468.31-mRNA-1  | NA | NA       |              | Os07g0433200 | OsR498G0510328900.01.T01 | Retrotransposon protein, putative, Ty1-copia subclass                     |
| augustus_masked-1-processed-gene-470.25-mRNA-1  | NA | NA       |              | Os01g0905800 | OsR498G0102538200.01.T01 | Fructose-bisphosphate aldolase                                            |
| augustus_masked-1-processed-gene-470.9-mRNA-1   | NA | Indica   | LRR-TM       | Os01g0594300 | OsR498G0101457300.01.T01 | Leucine-rich repeat extensin-like protein 3                               |
| augustus_masked-1-processed-gene-472.67-mRNA-1  | NA | NA       |              | 0            | OsR498G0102553400.01.T01 |                                                                           |
| augustus_masked-1-processed-gene-473.25-mRNA-1  | NA | NA       |              |              |                          | Transcription factor BTF3                                                 |
| augustus_masked-1-processed-gene-48.30-mRNA-1   | NA | NA       |              | Os01g0189800 | OsR498G0100305000.01.T02 | DUF1618 domain-containing protein (Fragment)                              |
| augustus_masked-1-processed-gene-48.6-mRNA-1    | NA | NA       |              | Os01g0188800 | OsR498G0100302800.01.T01 | DUF1618 domain-containing protein (Fragment)                              |
| augustus_masked-1-processed-gene-491.70-mRNA-1  | NA | NA       |              | 0            | OsR498G0102677400.01.T01 | DUF295 domain-containing protein                                          |
| augustus_masked-1-processed-gene-491.74-mRNA-1  | NA | NA       |              | Os01g0942200 | OsR498G0102678200.01.T01 | DUF295 domain-containing protein                                          |
| augustus_masked-1-processed-gene-496.89-mRNA-1  | NA | Japonica |              | Os01g0951500 | OsR498G0510739700.01.T01 | Putative cytochrome P450-dependent fatty acid hydroxylase                 |
| augustus_masked-1-processed-gene-50.13-mRNA-1   | NA | NA       |              | Os01g0192000 | OsR498G0100316400.01.T03 | C3H transcription factor                                                  |
| augustus_masked-1-processed-gene-502.62-mRNA-1  | NA | NA       | CC-Kinase-TM | 0            | OsR498G0102752000.01.T01 | Non-specific serine/threonine protein kinase                              |
| augustus_masked-1-processed-gene-503.73-mRNA-1  | NA | NA       |              | 0            | OsR498G0102756200.01.T05 | Oxoprolinase 1                                                            |
| augustus_masked-1-processed-gene-505.62-mRNA-1  | NA | NA       |              | Os01g0970900 | OsR498G0102772400.01.T02 | Pentatricopeptide repeat-containing protein chloroplastic                 |
| augustus_masked-1-processed-gene-510.72-mRNA-1  | NA | NA       |              | 0            | OsR498G0102553400.01.T01 |                                                                           |
| augustus_masked-1-processed-gene-510.75-mRNA-1  | NA | NA       |              | Os05g0500400 | OsR498G0511115200.01.T01 | DUF1995 domain-containing protein (Fragment)                              |
| augustus_masked-1-processed-gene-58.86-mRNA-1   | NA | NA       | Kinase-TM    | Os01g0206700 | OsR498G0100377600.01.T01 | Non-specific serine/threonine protein kinase                              |
| augustus_masked-1-processed-gene-59.25-mRNA-1   | NA | NA       |              | Os01g0207200 | OsR498G0100379200.01.T01 | Peptide-N4-(N-acetyl-beta-glucosaminyl)asparagine amidase A heavy chain   |
| augustus_masked-1-processed-gene-59.27-mRNA-1   | NA | NA       |              | 0            | OsR498G0100380200.01.T01 | Peptide-N4-(N-acetyl-beta-glucosaminyl)asparagine amidase A               |
| augustus_masked-1-processed-gene-59.28-mRNA-1   | NA | NA       |              | Os01g0207600 | OsR498G0100380800.01.T01 | Peptide-N4-(N-acetyl-beta-glucosaminyl)asparagine amidase A               |
| augustus_masked-1-processed-gene-59.53-mRNA-1   | NA | NA       |              | Os01g0208400 | OsR498G0100383000.01.T01 | Peptide-N4-(N-acetyl-beta-glucosaminyl)asparagine amidase A heavy chain   |
| augustus_masked-1-processed-gene-61.14-mRNA-1   | NA | NA       |              | Os01g0211200 | OsR498G0100397000.01.T01 | Cytochrome P450 family monooxygenase                                      |
| augustus_masked-1-processed-gene-61.3-mRNA-1    | NA | Japonica |              | Os01g0210900 | OsR498G0100395200.01.T01 | Cytochrome P450 family monooxygenase                                      |
| augustus_masked-1-processed-gene-61.4-mRNA-1    | NA | NA       |              | Os01g0211000 | OsR498G0100395200.01.T01 | Cytochrome P450 family monooxygenase                                      |
| augustus_masked-1-processed-gene-80.27-mRNA-1   | NA | NA       |              | Os01g0244400 | OsR498G0100533600.01.T02 | RING-type domain-containing protein                                       |
| augustus_masked-1-processed-gene-80.7-mRNA-1    | NA | NA       |              | Os01g0243600 |                          | Fibrous sheath-interacting protein                                        |
| augustus_masked-1-processed-gene-81.23-mRNA-1   | NA | Indica   |              | Os01g0244400 | OsR498G0100537400.01.T01 |                                                                           |
| augustus_masked-1-processed-gene-81.28-mRNA-1   | NA | NA       |              | Os01g0246100 | OsR498G0100539200.01.T05 | Histone acetyltransferase                                                 |
| augustus_masked-1-processed-gene-83.8-mRNA-1    | NA | NA       |              | Os01g0249900 |                          | probable transcription factor At3g04930                                   |
| augustus_masked-1-processed-gene-83.9-mRNA-1    | NA | NA       |              | Os01g0250200 |                          | C2H2-type domain-containing protein (Fragment)                            |
| augustus_masked-1-processed-gene-84.11-mRNA-1   | NA | NA       |              | 0            | OsR498G0100560400.01.T01 |                                                                           |
| augustus_masked-1-processed-gene-85.2-mRNA-1    | NA | Indica   |              | Os01g0254300 | OsR498G0100568000.01.T01 | Pectinesterase                                                            |
| augustus_masked-1-processed-gene-85.22-mRNA-1   | NA | NA       |              | Os01g0254900 | OsR498G0100570800.01.T01 | Syntaxin-22                                                               |
| augustus_masked-1-processed-gene-85.23-mRNA-1   | NA | NA       |              | 0            | OsR498G0100573000.01.T01 |                                                                           |
| augustus_masked-1-processed-gene-86.10-mRNA-1   | NA | Japonica |              | Os01g0256500 | OsR498G0100576000.01.T03 | Zinc inducible protein-like                                               |
| augustus_masked-1-processed-gene-86.24-mRNA-1   | NA | NA       |              | Os01g0257100 | OsR498G0100578800.01.T01 | Rapid alkalization factor                                                 |
| augustus_masked-1-processed-gene-86.26-mRNA-1   | NA | NA       |              | Os01g0257300 | OsR498G0100579400.01.T03 | Flowering-promoting factor                                                |
| augustus_masked-1-processed-gene-89.44-mRNA-1   | NA | NA       |              | 0            | OsR498G0100600000.01.T05 |                                                                           |
| augustus_masked-1-processed-gene-90.25-mRNA-1   | NA | Indica   |              | Os04g0423200 | OsR498G0100607600.01.T01 |                                                                           |
| augustus_masked-1-processed-gene-90.28-mRNA-1   | NA | NA       |              | 0            | OsR498G0100600000.01.T05 |                                                                           |
| augustus_masked-1-processed-gene-91.58-mRNA-1   | NA | NA       |              | Os01g0265800 | OsR498G0100614400.01.T03 | UBP1-associated protein 2A                                                |
| augustus_masked-10-processed-gene-104.39-mRNA-1 | NA | Japonica |              | Os10g0427900 | OsR498G1120366000.01.T05 |                                                                           |

|                                                 |    |          |            |              |                          |                                                                  |
|-------------------------------------------------|----|----------|------------|--------------|--------------------------|------------------------------------------------------------------|
| augustus_masked-10-processed-gene-109.38-mRNA-1 | NA | NA       |            | 0            | OsR498G1018786200.01.T02 |                                                                  |
| augustus_masked-10-processed-gene-114.23-mRNA-1 | NA | NA       |            | Os04g0168400 | OsR498G0407618900.01.T01 | PGG domain-containing protein (Fragment)                         |
| augustus_masked-10-processed-gene-116.12-mRNA-1 | NA | NA       |            | Os04g0166600 | OsR498G0407611500.01.T05 | Histone deacetylase complex subunit like                         |
| augustus_masked-10-processed-gene-119.3-mRNA-1  | NA | NA       |            | Os04g0155000 | OsR498G0407591500.01.T01 |                                                                  |
| augustus_masked-10-processed-gene-119.4-mRNA-1  | NA | NA       |            | Os04g0161100 | OsR498G0407591100.01.T01 |                                                                  |
| augustus_masked-10-processed-gene-121.24-mRNA-1 | NA | NA       |            | Os04g0155000 | OsR498G0407573500.01.T01 |                                                                  |
| augustus_masked-10-processed-gene-121.25-mRNA-1 | NA | NA       |            | Os04g0154800 | OsR498G0407573300.01.T01 |                                                                  |
| augustus_masked-10-processed-gene-121.26-mRNA-1 | NA | NA       |            | 0            | OsR498G0407573100.01.T01 | DUF4220 domain-containing protein (Fragment)                     |
| augustus_masked-10-processed-gene-127.29-mRNA-1 | NA | NA       |            | 0            | OsR498G0306074300.01.T01 | Retrotransposon protein, putative, Ty1-copia subclass            |
| augustus_masked-10-processed-gene-127.5-mRNA-1  | NA | NA       |            | Os04g0141200 | OsR498G0407537100.01.T01 | Putative receptor-type protein kinase LRK1                       |
| augustus_masked-10-processed-gene-132.3-mRNA-1  | NA | NA       | Kinase     | Os04g0125700 | OsR498G0407520900.01.T01 | Non-specific serine/threonine protein kinase                     |
| augustus_masked-10-processed-gene-139.35-mRNA-1 | NA | NA       |            | Os04g0120300 | OsR498G0407492700.01.T01 | subtilisin-like protease SDD1                                    |
| augustus_masked-10-processed-gene-139.59-mRNA-1 | NA | NA       |            | Os04g0118700 |                          | Pentatricopeptide repeat-containing protein chloroplastic        |
| augustus_masked-10-processed-gene-142.16-mRNA-1 | NA | NA       |            |              |                          |                                                                  |
| augustus_masked-10-processed-gene-144.26-mRNA-1 | NA | NA       | CC-NBS-TM  |              |                          | NBS-LRR resistant protein (Fragment)                             |
| augustus_masked-10-processed-gene-146.25-mRNA-1 | NA | NA       |            | Os04g0107500 |                          | Glyoxylate/hydroxypyruvate reductase HPR3                        |
| augustus_masked-10-processed-gene-148.16-mRNA-1 | NA | NA       | Kinase-TM  | Os04g0103500 | OsR498G0407421200.01.T01 | G-type lectin 5-receptor-like serine/threonine-protein kinase    |
| augustus_masked-10-processed-gene-154.16-mRNA-1 | NA | Japonica |            | Os10g0450900 | OsR498G1018825800.01.T06 |                                                                  |
| augustus_masked-10-processed-gene-155.12-mRNA-1 | NA | NA       |            | 0            | OsR498G0408884400.01.T03 | Epstein-Barr virus EBNA-1-like                                   |
| augustus_masked-10-processed-gene-155.26-mRNA-1 | NA | Japonica |            | Os10g0451900 | OsR498G1018828000.01.T01 |                                                                  |
| augustus_masked-10-processed-gene-155.27-mRNA-1 | NA | Japonica |            | Os10g0451700 | OsR498G1018828000.01.T01 |                                                                  |
| augustus_masked-10-processed-gene-155.31-mRNA-1 | NA | Japonica |            | Os10g0452300 | OsR498G1018828200.01.T01 |                                                                  |
| augustus_masked-10-processed-gene-155.32-mRNA-1 | NA | NA       |            | Os10g0452400 | OsR498G1018828400.01.T01 |                                                                  |
| augustus_masked-10-processed-gene-155.33-mRNA-1 | NA | NA       |            | Os10g0452500 | OsR498G1018829200.01.T01 | Glycine rich protein 3                                           |
| augustus_masked-10-processed-gene-156.34-mRNA-1 | NA | NA       |            | Os10g0454300 | OsR498G1018834200.01.T01 | Transposon protein, putative, CACTA, En/Spm sub-class, expressed |
| augustus_masked-10-processed-gene-156.35-mRNA-1 | NA | NA       |            | Os10g0454500 | OsR498G1018834800.01.T01 | Root cap-specific glycine-rich protein                           |
| augustus_masked-10-processed-gene-156.36-mRNA-1 | NA | NA       |            | Os10g0454700 | OsR498G1018835400.01.T01 |                                                                  |
| augustus_masked-10-processed-gene-156.5-mRNA-1  | NA | NA       |            | Os10g0452700 | OsR498G1018829600.01.T01 | Glycine-rich cell wall structural protein 2 (Fragment)           |
| augustus_masked-10-processed-gene-156.9-mRNA-1  | NA | NA       |            | Os10g0453000 | OsR498G1018830800.01.T01 | Root cap-specific glycine-rich protein                           |
| augustus_masked-10-processed-gene-159.40-mRNA-1 | NA | NA       |            | Os10g0459700 | OsR498G1018848000.01.T01 | Xyloglucan galactosyltransferase KATAMARI1                       |
| augustus_masked-10-processed-gene-160.49-mRNA-1 | NA | Indica   |            | Os10g0462300 | OsR498G1018854400.01.T03 |                                                                  |
| augustus_masked-10-processed-gene-162.35-mRNA-1 | NA | NA       |            | 0            | OsR498G1018864600.01.T02 |                                                                  |
| augustus_masked-10-processed-gene-163.36-mRNA-1 | NA | NA       |            | Os10g0466200 | OsR498G1018866600.01.T02 | 54S ribosomal protein L19, mitochondrial                         |
| augustus_masked-10-processed-gene-17.31-mRNA-1  | NA | Japonica | Kinase-TM  | Os10g0123300 | OsR498G1018069800.01.T01 | Mitogen-activated protein kinase                                 |
| augustus_masked-10-processed-gene-25.16-mRNA-1  | NA | NA       | LRR-NBS-TM | Os10g0136100 |                          | NB-ARC domain containing protein, expressed                      |
| augustus_masked-10-processed-gene-27.36-mRNA-1  | NA | NA       |            | Os10g0139300 | OsR498G1018115600.01.T01 | F-box domain containing protein, expressed                       |
| augustus_masked-10-processed-gene-27.39-mRNA-1  | NA | NA       |            | Os10g0139700 | OsR498G1018117600.01.T01 | Cytochrome P450 family 87 subfamily A polypeptide 6              |
| augustus_masked-10-processed-gene-30.29-mRNA-1  | NA | NA       |            | Os10g0145200 | OsR498G1018134400.01.T02 | F-box domain containing protein, expressed                       |
| augustus_masked-10-processed-gene-30.33-mRNA-1  | NA | NA       |            | 0            | OsR498G1018136600.01.T01 | F-box domain-containing protein                                  |
| augustus_masked-10-processed-gene-36.28-mRNA-1  | NA | NA       | Kinase-TM  | Os10g0154500 | OsR498G1018162400.01.T01 | Cyclin-dependent kinase-like 2                                   |
| augustus_masked-10-processed-gene-36.7-mRNA-1   | NA | NA       |            | Os10g0152000 | OsR498G1018157400.01.T01 | Wall-associated receptor kinase 3                                |
| augustus_masked-10-processed-gene-42.30-mRNA-1  | NA | NA       |            | Os10g0162300 |                          | C2H2-type domain-containing protein                              |
| augustus_masked-10-processed-gene-57.18-mRNA-1  | NA | Indica   |            | Os03g0658800 | OsR498G1018274000.01.T03 |                                                                  |
| augustus_masked-10-processed-gene-60.25-mRNA-1  | NA | NA       |            | 0            | OsR498G1018299800.01.T01 | PMEL domain-containing protein (Fragment)                        |
| augustus_masked-10-processed-gene-66.35-mRNA-1  | NA | NA       |            | 0            | OsR498G1018333000.01.T01 | PMD domain-containing protein                                    |
| augustus_masked-10-processed-gene-68.13-mRNA-1  | NA | NA       |            | 0            | OsR498G0510213600.01.T01 |                                                                  |
| augustus_masked-10-processed-gene-69.21-mRNA-1  | NA | NA       |            | Os08g0381000 | OsR498G0917373300.01.T01 | Retrotransposon protein, putative, Ty3-gypsy subclass            |
| augustus_masked-10-processed-gene-87.19-mRNA-1  | NA | Indica   |            | Os10g0213700 | OsR498G1018399800.01.T01 | Acidic leucine-rich nuclear phosphoprotein 32-related protein    |
| augustus_masked-10-processed-gene-88.22-mRNA-1  | NA | NA       |            | 0            | OsR498G0203809100.01.T01 | DUF834 domain-containing protein                                 |
| augustus_masked-10-processed-gene-92.4-mRNA-1   | NA | NA       |            | 0            | OsR498G0203809100.01.T01 | DUF834 domain-containing protein                                 |
| augustus_masked-10-processed-gene-98.17-mRNA-1  | NA | NA       |            | Os10g0318300 |                          |                                                                  |
| augustus_masked-11-processed-gene-0.37-mRNA-1   | NA | NA       |            | Os11g0102700 | OsR498G1119278000.01.T04 | Sentrin-specific protease                                        |
| augustus_masked-11-processed-gene-0.43-mRNA-1   | NA | NA       |            | 0            | OsR498G0511427100.01.T01 | Epstein-Barr virus EBNA-1-like                                   |
| augustus_masked-11-processed-gene-140.14-mRNA-1 | NA | NA       |            | 0            | OsR498G1221140400.01.T01 |                                                                  |
| augustus_masked-11-processed-gene-153.19-mRNA-1 | NA | NA       |            | Os11g0500100 |                          | HAT dimerisation domain-containing protein-like                  |
| augustus_masked-11-processed-gene-162.15-mRNA-1 | NA | NA       |            | Os11g0521500 | OsR498G1120235000.01.T02 | Acyl carrier protein 4, chloroplastic                            |
| augustus_masked-11-processed-gene-168.20-mRNA-1 | NA | NA       |            | Os11g0531900 | OsR498G1120275200.01.T01 |                                                                  |
| augustus_masked-11-processed-gene-177.18-mRNA-1 | NA | NA       |            | 0            | OsR498G0511458200.01.T01 |                                                                  |
| augustus_masked-11-processed-gene-179.6-mRNA-1  | NA | NA       |            | Os11g0549670 |                          | Trihelix transcription factor ASIL2                              |
| augustus_masked-11-processed-gene-179.7-mRNA-1  | NA | NA       |            | Os11g0549675 |                          |                                                                  |
| augustus_masked-11-processed-gene-191.5-mRNA-1  | NA | NA       |            | Os08g0381000 | OsR498G0510190000.01.T01 | Cell wall protein-like                                           |

|                                                 |    |          |               |              |                          |                                                                    |
|-------------------------------------------------|----|----------|---------------|--------------|--------------------------|--------------------------------------------------------------------|
| augustus_masked-11-processed-gene-192.16-mRNA-1 | NA | NA       |               | Os01g0956300 |                          |                                                                    |
| augustus_masked-11-processed-gene-197.7-mRNA-1  | NA | NA       |               | 0            | OsR498G0612698200.01.T01 |                                                                    |
| augustus_masked-11-processed-gene-202.35-mRNA-1 | NA | NA       |               | 0            | OsR498G0611633900.01.T01 |                                                                    |
| augustus_masked-11-processed-gene-203.21-mRNA-1 | NA | NA       | CC-NBS-TM     | Os11g0598300 | OsR498G1120448400.01.T01 | Leucine Rich Repeat family protein, expressed                      |
| augustus_masked-11-processed-gene-211.3-mRNA-1  | NA | NA       | CC-NBS-TM     | Os11g0609700 | OsR498G1120489600.01.T01 | Disease resistance protein RPM1                                    |
| augustus_masked-11-processed-gene-219.12-mRNA-1 | NA | NA       | CC-LRR-NBS-TM | Os11g0623800 | OsR498G1120539400.01.T03 | Putative nucleotide-binding leucine-rich-repeat protein 1          |
| augustus_masked-11-processed-gene-229.35-mRNA-1 | NA | NA       |               | 0            | OsR498G1120619800.01.T01 | F-box domain-containing protein (Fragment)                         |
| augustus_masked-11-processed-gene-230.2-mRNA-1  | NA | NA       |               | Os11g0642100 | OsR498G1120621600.01.T01 | F-box domain containing protein, expressed                         |
| augustus_masked-11-processed-gene-230.34-mRNA-1 | NA | Indica   |               | Os08g0364700 | OsR498G1120673600.01.T01 |                                                                    |
| augustus_masked-11-processed-gene-230.4-mRNA-1  | NA | NA       |               | Os11g0642400 | OsR498G1120622600.01.T01 | Tryptamine benzoyl transferase                                     |
| augustus_masked-11-processed-gene-242.5-mRNA-1  | NA | NA       |               | 0            | OsR498G0511427100.01.T01 | Epstein-Barr virus EBNA-1-like                                     |
| augustus_masked-11-processed-gene-244.4-mRNA-1  | NA | NA       | CC-Kinase-TM  | Os11g0664000 | OsR498G1120691000.01.T01 | L-type lectin-domain containing receptor kinase IX.1               |
| augustus_masked-11-processed-gene-245.11-mRNA-1 | NA | NA       | CC-NBS        | Os11g0668000 | OsR498G1120693800.01.T01 | Putative NBS-LRR class RGA                                         |
| augustus_masked-11-processed-gene-247.38-mRNA-1 | NA | NA       |               | 0            | OsR498G1120705000.01.T01 | stachyose synthase                                                 |
| augustus_masked-11-processed-gene-247.40-mRNA-1 | NA | NA       |               | Os11g0673000 | OsR498G1120707000.01.T03 | Pentatricopeptide repeat                                           |
| augustus_masked-11-processed-gene-249.38-mRNA-1 | NA | NA       |               | Os11g0677400 | OsR498G1120716000.01.T01 | Ribonucleases P/MRP protein subunit POP1 containing protein-like   |
| augustus_masked-11-processed-gene-254.35-mRNA-1 | NA | NA       |               | 0            | OsR498G0408884400.01.T03 | Epstein-Barr virus EBNA-1-like                                     |
| augustus_masked-11-processed-gene-255.23-mRNA-1 | NA | NA       |               | 0            | OsR498G0511458200.01.T01 |                                                                    |
| augustus_masked-11-processed-gene-259.30-mRNA-1 | NA | NA       |               | Os10g0192300 | OsR498G0306363500.01.T01 | ATP-dependent DNA helicase                                         |
| augustus_masked-11-processed-gene-26.21-mRNA-1  | NA | NA       |               | Os11g0191800 | OsR498G1119549700.01.T01 | Pectinesterase                                                     |
| augustus_masked-11-processed-gene-26.47-mRNA-1  | NA | Japonica |               | Os11g0194600 | OsR498G1119545900.01.T01 | PMEI domain-containing protein                                     |
| augustus_masked-11-processed-gene-26.49-mRNA-1  | NA | NA       |               | Os11g0194600 | OsR498G1119545900.01.T01 | PMEI domain-containing protein                                     |
| augustus_masked-11-processed-gene-261.44-mRNA-1 | NA | NA       |               |              |                          | Zinc finger protein ZAT5                                           |
| augustus_masked-11-processed-gene-262.11-mRNA-1 | NA | NA       | NBS-TM        | Os05g0250700 | OsR498G0510149400.01.T01 | NB-ARC domain, putative                                            |
| augustus_masked-11-processed-gene-27.27-mRNA-1  | NA | NA       |               | 0            | OsR498G0204638300.01.T01 |                                                                    |
| augustus_masked-11-processed-gene-29.18-mRNA-1  | NA | Japonica |               | Os11g0170900 | OsR498G0407767500.01.T01 | BURP domain-containing protein 5                                   |
| augustus_masked-11-processed-gene-39.32-mRNA-1  | NA | NA       |               | Os11g0187600 | OsR498G1119540600.01.T01 | Heat shock 70 kDa protein 3                                        |
| augustus_masked-11-processed-gene-41.32-mRNA-1  | NA | NA       |               | Os11g0191800 | OsR498G1119549700.01.T01 | Pectinesterase                                                     |
| augustus_masked-11-processed-gene-41.37-mRNA-1  | NA | NA       |               | Os11g0193800 | OsR498G1119549700.01.T01 | Pectinesterase                                                     |
| augustus_masked-11-processed-gene-62.34-mRNA-1  | NA | NA       |               |              |                          | Retrotransposon protein, putative, Ty3-gypsy sub-class             |
| augustus_masked-11-processed-gene-62.37-mRNA-1  | NA | Japonica |               | Os11g0194600 | OsR498G1119545900.01.T01 | PMEI domain-containing protein                                     |
| augustus_masked-11-processed-gene-67.31-mRNA-1  | NA | NA       |               | Os11g0203000 |                          |                                                                    |
| augustus_masked-11-processed-gene-69.27-mRNA-1  | NA | NA       |               | Os11g0206200 | OsR498G1119583000.01.T04 | Mitochondrial transcription termination factor-like                |
| augustus_masked-11-processed-gene-69.28-mRNA-1  | NA | NA       |               | Os11g0206300 | OsR498G1119583600.01.T01 | Mitochondrial transcription termination factor-like family-1       |
| augustus_masked-11-processed-gene-74.21-mRNA-1  | NA | Indica   | CC-NBS-TM     | Os11g0213800 | OsR498G1119611200.01.T01 | NBS-LRR type protein (Fragment)                                    |
| augustus_masked-11-processed-gene-76.33-mRNA-1  | NA | NA       |               | 0            | OsR498G1119618800.01.T01 | Carboxyl-terminal peptidase, putative, expressed                   |
| augustus_masked-11-processed-gene-79.20-mRNA-1  | NA | NA       |               | Os11g0220800 | OsR498G1119634100.01.T01 | 60S ribosomal protein L10                                          |
| augustus_masked-11-processed-gene-83.18-mRNA-1  | NA | NA       | CC-LRR-NBS-TM |              |                          | NBS-LRR type protein (Fragment)                                    |
| augustus_masked-11-processed-gene-84.45-mRNA-1  | NA | Indica   |               | Os11g0231400 | OsR498G1119654600.01.T01 | F-box domain containing protein-like                               |
| augustus_masked-11-processed-gene-86.42-mRNA-1  | NA | NA       |               | 0            | OsR498G1119664800.01.T01 | VQ domain-containing protein                                       |
| augustus_masked-11-processed-gene-88.46-mRNA-1  | NA | Japonica |               | Os11g0240000 | OsR498G1119681000.01.T01 | Gibberellin receptor GID1L2                                        |
| augustus_masked-12-processed-gene-11.84-mRNA-1  | NA | NA       |               | 0            | OsR498G1220856000.01.T01 | RRM domain-containing protein                                      |
| augustus_masked-12-processed-gene-113.3-mRNA-1  | NA | NA       |               | Os12g0288400 | OsR498G1221338800.01.T02 | E3 ubiquitin-protein ligase RGLG1                                  |
| augustus_masked-12-processed-gene-113.30-mRNA-1 | NA | NA       |               | Os12g0289800 | OsR498G1221344000.01.T05 | Pentatricopeptide, putative, expressed                             |
| augustus_masked-12-processed-gene-12.54-mRNA-1  | NA | NA       |               | Os12g0124400 | OsR498G1119355200.01.T02 | Arabinosyltransferase ARAD1                                        |
| augustus_masked-12-processed-gene-127.26-mRNA-1 | NA | Japonica | NBS           | Os12g0409901 | OsR498G1221377600.01.T02 | ABC transporter domain-containing protein                          |
| augustus_masked-12-processed-gene-127.3-mRNA-1  | NA | NA       |               | 0            | OsR498G1221373700.01.T01 |                                                                    |
| augustus_masked-12-processed-gene-13.28-mRNA-1  | NA | NA       |               | Os12g0127200 | OsR498G1220870600.01.T01 | Harpin-induced protein 1 containing protein, expressed             |
| augustus_masked-12-processed-gene-130.14-mRNA-1 | NA | NA       |               | Os12g0413400 |                          |                                                                    |
| augustus_masked-12-processed-gene-132.11-mRNA-1 | NA | Japonica |               | Os12g0415400 | OsR498G1221397600.01.T01 | Histone H3 (Trinotate prediction)                                  |
| augustus_masked-12-processed-gene-132.22-mRNA-1 | NA | NA       |               | Os12g0415800 | OsR498G1221397600.01.T01 | Histone domain-containing protein (Fragment)                       |
| augustus_masked-12-processed-gene-139.29-mRNA-1 | NA | NA       | Kinase-TM     | Os12g0427000 |                          | Cyclin-dependent kinase                                            |
| augustus_masked-12-processed-gene-140.24-mRNA-1 | NA | NA       |               | Os12g0427600 | OsR498G1221431000.01.T01 | Subtilase family protein, expressed                                |
| augustus_masked-12-processed-gene-145.10-mRNA-1 | NA | Japonica |               | Os12g0453500 | OsR498G1221528600.01.T01 |                                                                    |
| augustus_masked-12-processed-gene-146.18-mRNA-1 | NA | NA       |               | Os10g0427400 | OsR498G1018760500.01.T02 | BTB/POZ domain containing protein, expressed                       |
| augustus_masked-12-processed-gene-148.19-mRNA-1 | NA | NA       |               | 0            | OsR498G1221454800.01.T01 |                                                                    |
| augustus_masked-12-processed-gene-165.14-mRNA-1 | NA | NA       |               | Os11g0515000 | OsR498G1120218800.01.T01 | Armadillo/beta-catenin-like repeat family protein, expressed       |
| augustus_masked-12-processed-gene-189.7-mRNA-1  | NA | NA       |               | 0            | OsR498G0101192000.01.T01 | Zinc knuckle containing protein-like                               |
| augustus_masked-12-processed-gene-199.30-mRNA-1 | NA | NA       | Kinase-TM     | Os12g0500400 |                          | Lectin receptor kinase-like protein                                |
| augustus_masked-12-processed-gene-2.33-mRNA-1   | NA | NA       |               |              |                          | Oleate 12-desaturase                                               |
| augustus_masked-12-processed-gene-2.34-mRNA-1   | NA | NA       |               | Os12g0104400 | OsR498G1119284600.01.T05 | Temperature-sensitive omega-3 fatty acid desaturase, chloroplastic |

|                                                 |    |          |           |              |                          |                                                                            |
|-------------------------------------------------|----|----------|-----------|--------------|--------------------------|----------------------------------------------------------------------------|
| augustus_masked-12-processed-gene-210.4-mRNA-1  | NA | NA       |           |              |                          | F-box domain containing protein, expressed                                 |
| augustus_masked-12-processed-gene-217.28-mRNA-1 | NA | NA       |           | 0            | OsR498G0100073600.01.T01 |                                                                            |
| augustus_masked-12-processed-gene-217.9-mRNA-1  | NA | NA       |           | 0            | OsR498G1221765200.01.T01 | Metalloenzyme domain-containing protein/PhosphMutase domain-containi       |
| augustus_masked-12-processed-gene-234.9-mRNA-1  | NA | NA       |           | Os03g0158000 | OsR498G1221887800.01.T01 |                                                                            |
| augustus_masked-12-processed-gene-242.23-mRNA-1 | NA | NA       |           | Os12g0578600 |                          | C2H2-type domain-containing protein                                        |
| augustus_masked-12-processed-gene-242.24-mRNA-1 | NA | NA       |           | Os12g0578700 | OsR498G1221937000.01.T02 | C2H2-type domain-containing protein                                        |
| augustus_masked-12-processed-gene-244.21-mRNA-1 | NA | Japonica |           | Os12g0582666 | OsR498G1221955800.01.T01 | Isoflavone 2'-hydroxylase                                                  |
| augustus_masked-12-processed-gene-246.3-mRNA-1  | NA | NA       |           | Os12g0585200 | OsR498G1221976200.01.T03 | DUF295 domain-containing protein (Fragment)                                |
| augustus_masked-12-processed-gene-257.18-mRNA-1 | NA | Japonica | Kinase-TM | Os12g0603700 | OsR498G0306613200.01.T01 | Non-specific serine/threonine protein kinase                               |
| augustus_masked-12-processed-gene-260.9-mRNA-1  | NA | Indica   | Kinase-TM | Os12g0608500 | OsR498G1222075300.01.T01 | L-type lectin-domain containing receptor kinase IX.1                       |
| augustus_masked-12-processed-gene-266.40-mRNA-1 | NA | NA       |           | 0            | OsR498G1222120200.01.T07 |                                                                            |
| augustus_masked-12-processed-gene-267.18-mRNA-1 | NA | NA       |           | Os12g0618800 | OsR498G1222122000.01.T01 | Core-2/-l-branching beta-16-N-acetylglucosaminyltransferase family protein |
| augustus_masked-12-processed-gene-272.44-mRNA-1 | NA | NA       |           | Os12g0630100 | OsR498G1222152600.01.T01 | Thaumatococcus-like protein (Fragment)                                     |
| augustus_masked-12-processed-gene-276.25-mRNA-1 | NA | NA       | CC-NBS-TM | Os07g0105900 |                          | NB-ARC domain-containing protein                                           |
| augustus_masked-12-processed-gene-276.7-mRNA-1  | NA | NA       |           | Os07g0105300 | OsR498G0713369000.01.T02 | Neurofilament heavy polypeptide                                            |
| augustus_masked-12-processed-gene-277.20-mRNA-1 | NA | NA       |           | 0            | OsR498G0713376400.01.T01 |                                                                            |
| augustus_masked-12-processed-gene-277.5-mRNA-1  | NA | NA       |           | 0            | OsR498G0713374400.01.T01 |                                                                            |
| augustus_masked-12-processed-gene-278.51-mRNA-1 | NA | NA       |           | Os07g0109100 | OsR498G0713381000.01.T01 | DUF4220 domain-containing protein (Fragment)                               |
| augustus_masked-12-processed-gene-278.68-mRNA-1 | NA | NA       |           | Os07g0110200 | OsR498G0713385200.01.T01 | Nucleolar GTP-binding protein 1                                            |
| augustus_masked-12-processed-gene-28.55-mRNA-1  | NA | Japonica |           | Os12g0153200 | OsR498G1119432200.01.T01 |                                                                            |
| augustus_masked-12-processed-gene-280.59-mRNA-1 | NA | NA       |           | Os07g0113700 | OsR498G0713400200.01.T01 | Suppressor of RPS4-RLD 1                                                   |
| augustus_masked-12-processed-gene-282.26-mRNA-1 | NA | NA       |           | Os04g0559000 | OsR498G0409063400.01.T01 | Subtilisin-like protease                                                   |
| augustus_masked-12-processed-gene-282.7-mRNA-1  | NA | NA       |           | 0            | OsR498G0204046800.01.T01 | Circumsporozoite protein-like                                              |
| augustus_masked-12-processed-gene-285.64-mRNA-1 | NA | NA       |           | Os02g0670900 | OsR498G0409082600.01.T01 | Amino acid transporter like                                                |
| augustus_masked-12-processed-gene-286.5-mRNA-1  | NA | NA       |           | Os04g0566000 | OsR498G0409083800.01.T03 | Nucleotide-diphospho-sugar transferase family protein (Fragment)           |
| augustus_masked-12-processed-gene-287.41-mRNA-1 | NA | NA       |           | Os02g0673700 | OsR498G0409093200.01.T04 | Dof zinc finger protein 1                                                  |
| augustus_masked-12-processed-gene-29.31-mRNA-1  | NA | Japonica |           | Os12g0155000 | OsR498G1220962000.01.T01 | Germin-like protein 12-1                                                   |
| augustus_masked-12-processed-gene-30.22-mRNA-1  | NA | NA       |           | Os12g0156500 |                          | F-box domain containing protein, expressed                                 |
| augustus_masked-12-processed-gene-31.22-mRNA-1  | NA | NA       |           | Os12g0158400 | OsR498G1220979400.01.T02 | Transcription repressor                                                    |
| augustus_masked-12-processed-gene-31.25-mRNA-1  | NA | Japonica |           | Os12g0158700 | OsR498G1119445600.01.T01 |                                                                            |
| augustus_masked-12-processed-gene-31.28-mRNA-1  | NA | NA       |           | Os12g0159000 | OsR498G1220983000.01.T01 | Harpin-induced protein 1 containing protein, expressed                     |
| augustus_masked-12-processed-gene-32.6-mRNA-1   | NA | NA       |           | 0            | OsR498G1220985600.01.T01 |                                                                            |
| augustus_masked-12-processed-gene-33.35-mRNA-1  | NA | NA       |           | 0            | OsR498G1220996400.01.T01 | PHD domain-containing protein                                              |
| augustus_masked-12-processed-gene-5.58-mRNA-1   | NA | Japonica |           | Os12g0109300 | OsR498G1119303000.01.T01 | Pentatricopeptide repeat-containing protein                                |
| augustus_masked-12-processed-gene-54.11-mRNA-1  | NA | Japonica |           | Os12g0199800 | OsR498G0816429700.01.T01 | Oryza sativa E synthase                                                    |
| augustus_masked-12-processed-gene-63.37-mRNA-1  | NA | Japonica | LRR-TM    | Os12g0215950 | OsR498G1221115800.01.T01 | Leucine Rich Repeat family protein, expressed                              |
| augustus_masked-12-processed-gene-68.28-mRNA-1  | NA | NA       |           | Os12g0223100 |                          |                                                                            |
| augustus_masked-12-processed-gene-8.23-mRNA-1   | NA | NA       |           | Os11g0116500 | OsR498G1119324200.01.T02 |                                                                            |
| augustus_masked-2-processed-gene-160.30-mRNA-1  | NA | NA       |           | Os02g0468450 |                          |                                                                            |
| augustus_masked-2-processed-gene-169.12-mRNA-1  | NA | NA       |           | Os08g0487300 | OsR498G0102102900.01.T01 | Transposon protein, putative, Mutator sub-class, expressed                 |
| augustus_masked-2-processed-gene-351.18-mRNA-1  | NA | NA       |           | Os06g0641900 | OsR498G0613042400.01.T01 | Premnaspirodione oxygenase                                                 |
| augustus_masked-2-processed-gene-87.31-mRNA-1   | NA | NA       |           | Os02g0254550 |                          | BED-type domain-containing protein                                         |
| augustus_masked-3-processed-gene-1.1-mRNA-1     | NA | Japonica |           | Os03g0105300 | OsR498G0305082800.01.T01 |                                                                            |
| augustus_masked-3-processed-gene-115.14-mRNA-1  | NA | Indica   |           | Os03g0324300 | OsR498G0305853900.01.T02 | Ethylene signal transcription factor                                       |
| augustus_masked-3-processed-gene-116.9-mRNA-1   | NA | NA       |           | 0            | OsR498G1018413900.01.T01 |                                                                            |
| augustus_masked-3-processed-gene-118.0-mRNA-1   | NA | NA       |           | Os06g0289300 | OsR498G0305073300.01.T03 | Protein kinase domain-containing protein                                   |
| augustus_masked-3-processed-gene-118.10-mRNA-1  | NA | NA       |           | Os03g0102500 | OsR498G0305072400.01.T01 | Beta expansin 3                                                            |
| augustus_masked-3-processed-gene-120.44-mRNA-1  | NA | NA       |           | Os10g0558600 | OsR498G1019186300.01.T01 | Pentatricopeptide repeat-containing protein                                |
| augustus_masked-3-processed-gene-120.45-mRNA-1  | NA | NA       |           | Os10g0558800 | OsR498G1019187100.01.T01 | Sorbitol transporter                                                       |
| augustus_masked-3-processed-gene-120.72-mRNA-1  | NA | NA       |           | 0            | OsR498G1019189000.01.T02 |                                                                            |
| augustus_masked-3-processed-gene-121.56-mRNA-1  | NA | NA       |           | 0            | OsR498G1019198300.01.T01 | Protein kinase domain-containing protein                                   |
| augustus_masked-3-processed-gene-121.70-mRNA-1  | NA | NA       |           | Os10g0562000 | OsR498G1019200400.01.T01 | Actin cytoskeleton-regulatory complex protein SLA1 (Fragment)              |
| augustus_masked-3-processed-gene-122.53-mRNA-1  | NA | NA       |           | Os10g0562900 | OsR498G1019203700.01.T02 | Ethylene-responsive transcription factor 5                                 |
| augustus_masked-3-processed-gene-123.10-mRNA-1  | NA | NA       |           | Os10g0564300 | OsR498G1019209200.01.T01 | 60S ribosomal protein L27                                                  |
| augustus_masked-3-processed-gene-123.3-mRNA-1   | NA | NA       |           | Os10g0564200 | OsR498G1019208700.01.T02 | Trihelix transcription factor                                              |
| augustus_masked-3-processed-gene-124.10-mRNA-1  | NA | NA       |           | Os10g0566400 | OsR498G1019218100.01.T01 | Putative RING-H2 finger protein ATL53                                      |
| augustus_masked-3-processed-gene-124.9-mRNA-1   | NA | NA       |           | Os10g0566300 | OsR498G1019217300.01.T01 | F-box protein interaction domain containing protein, expressed             |
| augustus_masked-3-processed-gene-125.51-mRNA-1  | NA | NA       |           | Os10g0567500 |                          | Mitochondrial protein ymf11                                                |
| augustus_masked-3-processed-gene-125.57-mRNA-1  | NA | NA       |           | Os10g0567600 | OsR498G1019221800.01.T01 |                                                                            |
| augustus_masked-3-processed-gene-132.22-mRNA-1  | NA | NA       |           | Os03g0100150 | OsR498G0305066500.01.T01 | PMEI domain-containing protein (Fragment)                                  |
| augustus_masked-3-processed-gene-132.30-mRNA-1  | NA | NA       |           | 0            | OsR498G0305065200.01.T01 | Protein TORNADO like                                                       |

|                                                |    |          |           |              |                          |                                                                              |
|------------------------------------------------|----|----------|-----------|--------------|--------------------------|------------------------------------------------------------------------------|
| augustus_masked-3-processed-gene-140.55-mRNA-1 | NA | NA       |           | Os10g0543150 |                          |                                                                              |
| augustus_masked-3-processed-gene-143.18-mRNA-1 | NA | NA       |           | Os05g0256350 |                          | HAT dimerisation domain-containing protein-like                              |
| augustus_masked-3-processed-gene-146.43-mRNA-1 | NA | NA       |           | Os10g0555300 | OsR498G1019167000.01.T01 | Zinc finger protein ZAT9                                                     |
| augustus_masked-3-processed-gene-147.6-mRNA-1  | NA | NA       |           | Os06g0100266 |                          | zf-LSD1 domain-containing protein                                            |
| augustus_masked-3-processed-gene-148.34-mRNA-1 | NA | Indica   |           | Os03g0324300 | OsR498G0305853900.01.T02 | Ethylene signal transcription factor                                         |
| augustus_masked-3-processed-gene-152.50-mRNA-1 | NA | NA       |           | Os08g0514300 |                          | Ulp1 protease family, C-terminal catalytic domain containing protein, expres |
| augustus_masked-3-processed-gene-158.20-mRNA-1 | NA | Indica   |           | Os03g0343700 | OsR498G0305924100.01.T01 | Brix domain containing protein, expressed                                    |
| augustus_masked-3-processed-gene-159.36-mRNA-1 | NA | NA       |           | Os03g0343900 | OsR498G0305924900.01.T01 | Ultraviolet-B-repressible protein (Fragment)                                 |
| augustus_masked-3-processed-gene-159.57-mRNA-1 | NA | NA       |           | Os03g0345300 | OsR498G0305928800.01.T01 | Desiccation-related protein PCC13-62                                         |
| augustus_masked-3-processed-gene-16.22-mRNA-1  | NA | NA       |           | Os03g0132600 | OsR498G0305178700.01.T01 |                                                                              |
| augustus_masked-3-processed-gene-16.27-mRNA-1  | NA | NA       | LRR-TM    | Os03g0133400 | OsR498G0305181500.01.T01 | Chitin elicitor-binding protein (Fragment)                                   |
| augustus_masked-3-processed-gene-160.1-mRNA-1  | NA | NA       |           | 0            | OsR498G0305933500.01.T01 |                                                                              |
| augustus_masked-3-processed-gene-160.8-mRNA-1  | NA | Indica   |           | Os05g0375400 | OsR498G0305935700.01.T01 | Truncated pathogenesis-related protein 6                                     |
| augustus_masked-3-processed-gene-162.62-mRNA-1 | NA | NA       |           | Os03g0351200 | OsR498G0305948400.01.T01 | Divinyl chlorophyllide a 8-vinyl-reductase                                   |
| augustus_masked-3-processed-gene-166.23-mRNA-1 | NA | NA       |           | Os03g0360600 | OsR498G0305990700.01.T01 | Transcription termination factor MTEF1, chloroplastic                        |
| augustus_masked-3-processed-gene-167.1-mRNA-1  | NA | NA       |           | 0            | OsR498G0917372400.01.T01 | BKRF1 encodes EBNA-1 protein-like                                            |
| augustus_masked-3-processed-gene-169.6-mRNA-1  | NA | NA       |           | Os03g0355100 | OsR498G0305965400.01.T02 |                                                                              |
| augustus_masked-3-processed-gene-169.7-mRNA-1  | NA | NA       |           | Os03g0355300 | OsR498G0305965400.01.T02 |                                                                              |
| augustus_masked-3-processed-gene-17.1-mRNA-1   | NA | NA       |           | 0            | OsR498G0305184100.01.T01 |                                                                              |
| augustus_masked-3-processed-gene-17.6-mRNA-1   | NA | Indica   |           | Os03g0134632 | OsR498G0305184000.01.T01 | Cytochrome P450 family 78 subfamily A polypeptide 8                          |
| augustus_masked-3-processed-gene-172.42-mRNA-1 | NA | Indica   |           | Os03g0356900 | OsR498G0305987200.01.T01 | Isopentenyl transferase IPT2                                                 |
| augustus_masked-3-processed-gene-173.20-mRNA-1 | NA | NA       |           | Os05g0367000 | OsR498G0510679800.01.T01 | PHD finger-like domain-containing protein 5b-like                            |
| augustus_masked-3-processed-gene-174.21-mRNA-1 | NA | NA       |           | Os05g0369300 | OsR498G0510689500.01.T01 | Exocyst subunit Exo70 family protein (Fragment)                              |
| augustus_masked-3-processed-gene-182.53-mRNA-1 | NA | NA       |           | Os03g0373100 |                          |                                                                              |
| augustus_masked-3-processed-gene-183.5-mRNA-1  | NA | NA       |           | Os03g0375100 | OsR498G0306036800.01.T01 | Amino acid permease family protein, putative, expressed                      |
| augustus_masked-3-processed-gene-185.22-mRNA-1 | NA | NA       |           | Os03g0379500 | OsR498G0305248900.01.T01 | 30S ribosomal protein S4, chloroplastic                                      |
| augustus_masked-3-processed-gene-195.21-mRNA-1 | NA | NA       |           | Os03g0394800 |                          |                                                                              |
| augustus_masked-3-processed-gene-195.31-mRNA-1 | NA | NA       |           | Os09g0545000 | OsR498G0510827500.01.T01 | Cation/H(+) antiporter 1                                                     |
| augustus_masked-3-processed-gene-198.18-mRNA-1 | NA | Indica   |           | Os03g0399900 | OsR498G0306125700.01.T01 | Jacalin-type lectin domain-containing protein                                |
| augustus_masked-3-processed-gene-206.20-mRNA-1 | NA | NA       |           | Os03g0328200 |                          | Transposon protein, putative, CACTA, En/Spm sub-class                        |
| augustus_masked-3-processed-gene-208.15-mRNA-1 | NA | NA       |           | Os03g0413000 | OsR498G0306193300.01.T02 | Nuclear transcription factor Y subunit B                                     |
| augustus_masked-3-processed-gene-208.2-mRNA-1  | NA | Indica   |           | Os03g0412200 | OsR498G0306190700.01.T02 | Cysteine synthase 2-like isoform X1                                          |
| augustus_masked-3-processed-gene-209.14-mRNA-1 | NA | NA       |           | Os03g0414900 | OsR498G0306203100.01.T01 |                                                                              |
| augustus_masked-3-processed-gene-209.7-mRNA-1  | NA | NA       |           | Os03g0414100 | OsR498G0306198600.01.T01 |                                                                              |
| augustus_masked-3-processed-gene-211.19-mRNA-1 | NA | Japonica |           | Os03g0417700 | OsR498G0306216600.01.T01 | Cytochrome P450, family 78, subfamily A, polypeptide 10 (Fragment)           |
| augustus_masked-3-processed-gene-231.16-mRNA-1 | NA | NA       |           | Os07g0433200 | OsR498G0510328900.01.T01 | Retrotransposon protein, putative, Ty1-copia subclass                        |
| augustus_masked-3-processed-gene-234.15-mRNA-1 | NA | NA       |           | Os03g0570300 | OsR498G0306410800.01.T06 | Antigenic determinant of rec-A protein                                       |
| augustus_masked-3-processed-gene-236.0-mRNA-1  | NA | NA       |           |              |                          | Circumsporozoite protein-like                                                |
| augustus_masked-3-processed-gene-236.23-mRNA-1 | NA | NA       |           | 0            | OsR498G0306419400.01.T01 | SRF-type transcription factor family protein                                 |
| augustus_masked-3-processed-gene-236.24-mRNA-1 | NA | NA       |           | 0            | OsR498G0306419800.01.T01 | DUF834 domain-containing protein                                             |
| augustus_masked-3-processed-gene-237.13-mRNA-1 | NA | NA       |           | Os03g0574600 |                          | Potassium transporter 27-like isoform X1                                     |
| augustus_masked-3-processed-gene-238.31-mRNA-1 | NA | Indica   |           | Os06g0127800 | OsR498G0306431100.01.T01 | GRAS domain-containing protein                                               |
| augustus_masked-3-processed-gene-238.41-mRNA-1 | NA | NA       |           | Os04g0444600 | OsR498G0306432300.01.T04 | 26S proteasome non-ATPase regulatory subunit 11                              |
| augustus_masked-3-processed-gene-238.42-mRNA-1 | NA | NA       |           | Os03g0576400 | OsR498G0306432300.01.T04 | 26S proteasome non-ATPase regulatory subunit 11                              |
| augustus_masked-3-processed-gene-238.43-mRNA-1 | NA | Indica   |           | Os03g0576500 | OsR498G0306432500.01.T01 | PCI domain-containing protein                                                |
| augustus_masked-3-processed-gene-238.46-mRNA-1 | NA | NA       |           | 0            | OsR498G0306435300.01.T01 |                                                                              |
| augustus_masked-3-processed-gene-238.49-mRNA-1 | NA | NA       |           | 0            | OsR498G0613146100.01.T01 | OTU domain-containing protein                                                |
| augustus_masked-3-processed-gene-239.19-mRNA-1 | NA | NA       |           | 0            | OsR498G0100073600.01.T01 |                                                                              |
| augustus_masked-3-processed-gene-239.21-mRNA-1 | NA | NA       |           | Os03g0579000 | OsR498G0306448000.01.T01 | PDZ domain-containing protein (Fragment)                                     |
| augustus_masked-3-processed-gene-239.6-mRNA-1  | NA | Japonica |           | Os10g0391500 | OsR498G0306438100.01.T07 | Protein kinase domain-containing protein                                     |
| augustus_masked-3-processed-gene-239.8-mRNA-1  | NA | Indica   |           | Os03g0578500 | OsR498G0306438900.01.T01 | Myosin-2                                                                     |
| augustus_masked-3-processed-gene-240.22-mRNA-1 | NA | NA       |           | Os08g0381000 | OsR498G0510193500.01.T01 | Cell wall protein-like                                                       |
| augustus_masked-3-processed-gene-242.0-mRNA-1  | NA | NA       |           | 0            | OsR498G0306455700.01.T01 |                                                                              |
| augustus_masked-3-processed-gene-242.7-mRNA-1  | NA | NA       | Kinase-TM | Os03g0269300 | OsR498G0305649000.01.T01 | Protein kinase domain-containing protein (Fragment)                          |
| augustus_masked-3-processed-gene-244.0-mRNA-1  | NA | NA       |           | Os03g0586900 | OsR498G0306468100.01.T01 | Putative DNA-binding protein, putative                                       |
| augustus_masked-3-processed-gene-244.12-mRNA-1 | NA | NA       |           | 0            | OsR498G0306472300.01.T01 | NAC domain-containing protein                                                |
| augustus_masked-3-processed-gene-244.9-mRNA-1  | NA | NA       |           | Os03g0587600 | OsR498G0306469500.01.T01 | CCHC-type domain-containing protein                                          |
| augustus_masked-3-processed-gene-245.6-mRNA-1  | NA | NA       |           | Os03g0589100 | OsR498G0306476800.01.T01 | Retrotransposon protein, putative, Ty3-gypsy sub-class                       |
| augustus_masked-3-processed-gene-246.12-mRNA-1 | NA | Indica   |           | Os02g0315600 | OsR498G0306481700.01.T01 | BHLH domain-containing protein (Fragment)                                    |
| augustus_masked-3-processed-gene-246.15-mRNA-1 | NA | NA       |           | Os03g0589100 | OsR498G0306476800.01.T01 | Retrotransposon protein, putative, unclassified                              |
| augustus_masked-3-processed-gene-247.12-mRNA-1 | NA | NA       |           | Os03g0593100 | OsR498G0306486700.01.T01 |                                                                              |

|                                                |    |          |            |              |                          |                                                                |
|------------------------------------------------|----|----------|------------|--------------|--------------------------|----------------------------------------------------------------|
| augustus_masked-3-processed-gene-248.13-mRNA-1 | NA | NA       |            |              |                          |                                                                |
| augustus_masked-3-processed-gene-249.33-mRNA-1 | NA | NA       |            | Os03g0596700 | OsR498G0306497900.01.T01 |                                                                |
| augustus_masked-3-processed-gene-250.4-mRNA-1  | NA | NA       |            | Os03g0597200 | OsR498G0306499400.01.T02 | Pentatricopeptide repeat-containing protein chloroplastic      |
| augustus_masked-3-processed-gene-251.44-mRNA-1 | NA | NA       |            | 0            | OsR498G0306507900.01.T03 | Ultraviolet-B receptor UVR8                                    |
| augustus_masked-3-processed-gene-251.52-mRNA-1 | NA | NA       | LRR-NBS-TM | Os03g0599400 |                          | Leucine Rich Repeat family protein, expressed                  |
| augustus_masked-3-processed-gene-252.7-mRNA-1  | NA | NA       |            | 0            | OsR498G0306510800.01.T02 | DUF295 domain-containing protein (Fragment)                    |
| augustus_masked-3-processed-gene-253.1-mRNA-1  | NA | NA       |            | Os03g0602300 | OsR498G0306516100.01.T01 | Brassinosteroid-6-oxidase                                      |
| augustus_masked-3-processed-gene-253.14-mRNA-1 | NA | NA       |            | Os03g0603700 |                          | Presenilin                                                     |
| augustus_masked-3-processed-gene-254.33-mRNA-1 | NA | Indica   |            | Os08g0130300 | OsR498G0306527200.01.T02 | Tetratricopeptide repeat (TPR)-like superfamily protein        |
| augustus_masked-3-processed-gene-254.6-mRNA-1  | NA | NA       |            | Os03g0604200 | OsR498G0306523600.01.T01 | UDP-glucose 6-dehydrogenase 5                                  |
| augustus_masked-3-processed-gene-255.22-mRNA-1 | NA | NA       |            | 0            | OsR498G0203224200.01.T01 |                                                                |
| augustus_masked-3-processed-gene-255.36-mRNA-1 | NA | NA       |            |              |                          | Metal transporter Nramp3                                       |
| augustus_masked-3-processed-gene-256.16-mRNA-1 | NA | NA       |            | Os03g0607700 | OsR498G0306537600.01.T01 | Zinc finger protein 1                                          |
| augustus_masked-3-processed-gene-256.18-mRNA-1 | NA | NA       |            | Os03g0608000 |                          |                                                                |
| augustus_masked-3-processed-gene-257.19-mRNA-1 | NA | NA       |            | Os03g0610400 | OsR498G0306547800.01.T01 | C2H2 type zinc finger transcription factor ZFP31               |
| augustus_masked-3-processed-gene-258.31-mRNA-1 | NA | Japonica |            | Os03g0612400 | OsR498G0306552900.01.T01 | LOB domain-containing protein 6                                |
| augustus_masked-3-processed-gene-259.4-mRNA-1  | NA | NA       |            | 0            | OsR498G0306554000.01.T03 | 50S ribosomal protein L25                                      |
| augustus_masked-3-processed-gene-259.7-mRNA-1  | NA | NA       |            | 0            | OsR498G0306556200.01.T01 | ARF guanine-nucleotide exchange factor GNOM                    |
| augustus_masked-3-processed-gene-260.11-mRNA-1 | NA | NA       |            | Os07g0433200 | OsR498G0510328900.01.T01 |                                                                |
| augustus_masked-3-processed-gene-261.27-mRNA-1 | NA | NA       |            | Os03g0616500 |                          |                                                                |
| augustus_masked-3-processed-gene-261.51-mRNA-1 | NA | Japonica |            | Os03g0616600 | OsR498G0306563600.01.T01 | Condensin-2 complex subunit G2                                 |
| augustus_masked-3-processed-gene-262.2-mRNA-1  | NA | Japonica |            | Os03g0617700 | OsR498G0100564100.01.T01 |                                                                |
| augustus_masked-3-processed-gene-262.20-mRNA-1 | NA | NA       |            | 0            | OsR498G0306572500.01.T01 | TF-B3 domain-containing protein                                |
| augustus_masked-3-processed-gene-263.34-mRNA-1 | NA | NA       |            |              |                          | B3 domain-containing protein                                   |
| augustus_masked-3-processed-gene-264.27-mRNA-1 | NA | NA       |            | Os10g0427900 | OsR498G1120366000.01.T05 |                                                                |
| augustus_masked-3-processed-gene-264.34-mRNA-1 | NA | NA       |            | Os10g0429500 |                          |                                                                |
| augustus_masked-3-processed-gene-264.35-mRNA-1 | NA | NA       |            | Os10g0429500 | OsR498G1018758700.01.T01 | Speckle-type POZ protein                                       |
| augustus_masked-3-processed-gene-264.36-mRNA-1 | NA | NA       |            | Os10g0429300 | OsR498G1018762100.01.T01 | Speckle-type POZ protein B                                     |
| augustus_masked-3-processed-gene-264.8-mRNA-1  | NA | Indica   |            | Os11g0139400 | OsR498G0306581700.01.T01 | TPT domain-containing protein                                  |
| augustus_masked-3-processed-gene-264.9-mRNA-1  | NA | NA       |            | Os02g0212975 | OsR498G0202873200.01.T01 |                                                                |
| augustus_masked-3-processed-gene-279.21-mRNA-1 | NA | NA       |            |              |                          |                                                                |
| augustus_masked-3-processed-gene-281.40-mRNA-1 | NA | NA       |            | Os10g0400500 | OsR498G1018659000.01.T01 | Pyridoxal phosphate-dependent decarboxylase                    |
| augustus_masked-3-processed-gene-287.31-mRNA-1 | NA | Indica   |            | Os10g0391500 | OsR498G0306438100.01.T03 | Protein kinase domain-containing protein                       |
| augustus_masked-3-processed-gene-287.34-mRNA-1 | NA | NA       |            | Os10g0391200 | OsR498G1018629400.01.T07 | F-box protein interaction domain containing protein, expressed |
| augustus_masked-3-processed-gene-297.42-mRNA-1 | NA | NA       |            | 0            | OsR498G0509784600.01.T01 |                                                                |
| augustus_masked-3-processed-gene-302.25-mRNA-1 | NA | NA       |            | Os10g0369500 | OsR498G1018557800.01.T01 | Yippee domain-containing protein                               |
| augustus_masked-3-processed-gene-302.27-mRNA-1 | NA | NA       |            | Os10g0369000 | OsR498G1018557000.01.T01 | Glutamyl-tRNA synthetase                                       |
| augustus_masked-3-processed-gene-304.20-mRNA-1 | NA | NA       |            | Os10g0365300 | OsR498G1018552900.01.T01 | Glutathione S-transferase U16                                  |
| augustus_masked-3-processed-gene-305.18-mRNA-1 | NA | NA       |            | Os10g0362700 | OsR498G1018545900.01.T01 |                                                                |
| augustus_masked-3-processed-gene-309.6-mRNA-1  | NA | NA       | NBS-TM     |              |                          | Disease resistance protein RPM1                                |
| augustus_masked-3-processed-gene-317.32-mRNA-1 | NA | NA       |            | Os10g0343000 | OsR498G1018499500.01.T01 |                                                                |
| augustus_masked-3-processed-gene-318.0-mRNA-1  | NA | NA       | Kinase-TM  | Os10g0342300 | OsR498G0408563300.01.T01 | Non-specific serine/threonine protein kinase (Fragment)        |
| augustus_masked-3-processed-gene-326.12-mRNA-1 | NA | NA       |            | 0            | OsR498G1018457600.01.T01 | Rapid alkalization factor                                      |
| augustus_masked-3-processed-gene-326.29-mRNA-1 | NA | NA       |            | Os10g0328700 | OsR498G1018456700.01.T01 | Pre-mrna-splicing factor clf-1                                 |
| augustus_masked-3-processed-gene-326.30-mRNA-1 | NA | NA       |            | 0            | OsR498G1018455500.01.T01 | WRKY transcription factor 18                                   |
| augustus_masked-3-processed-gene-327.19-mRNA-1 | NA | NA       |            | Os10g0326800 | OsR498G1018446200.01.T01 | F-box domain-containing protein (Fragment)                     |
| augustus_masked-3-processed-gene-328.22-mRNA-1 | NA | NA       |            | Os10g0152000 | OsR498G1018445500.01.T01 | Putative WAK family receptor-like protein kinase               |
| augustus_masked-3-processed-gene-329.24-mRNA-1 | NA | NA       |            | 0            | OsR498G1018435100.01.T05 |                                                                |
| augustus_masked-3-processed-gene-330.17-mRNA-1 | NA | NA       |            | Os10g0322300 | OsR498G0916750300.01.T01 | Replication protein-like                                       |
| augustus_masked-3-processed-gene-331.0-mRNA-1  | NA | NA       |            | Os03g0647400 |                          | GCK domain-containing protein (Fragment)                       |
| augustus_masked-3-processed-gene-343.34-mRNA-1 | NA | NA       |            | Os03g0570300 | OsR498G0306410800.01.T06 | Antigenic determinant of rec-A protein                         |
| augustus_masked-3-processed-gene-345.11-mRNA-1 | NA | NA       |            |              |                          | Circumsporozoite protein-like                                  |
| augustus_masked-3-processed-gene-345.34-mRNA-1 | NA | NA       |            | 0            | OsR498G0306419400.01.T01 | SRF-type transcription factor family protein                   |
| augustus_masked-3-processed-gene-345.35-mRNA-1 | NA | NA       |            | 0            | OsR498G0306419800.01.T01 | DUF834 domain-containing protein                               |
| augustus_masked-3-processed-gene-345.38-mRNA-1 | NA | NA       | LRR-NBS-TM | Os03g0573500 | OsR498G0306422200.01.T01 | Putative disease resistance protein RGA3                       |
| augustus_masked-3-processed-gene-346.16-mRNA-1 | NA | NA       |            | Os03g0574600 |                          | Potassium transporter 27-like isoform X1                       |
| augustus_masked-3-processed-gene-347.1-mRNA-1  | NA | Indica   |            | Os06g0127800 | OsR498G0306431100.01.T01 | GRAS domain-containing protein                                 |
| augustus_masked-3-processed-gene-347.13-mRNA-1 | NA | NA       |            | Os04g0444600 | OsR498G0306432300.01.T04 | 26S proteasome non-ATPase regulatory subunit 11                |
| augustus_masked-3-processed-gene-347.14-mRNA-1 | NA | NA       |            | Os03g0576400 | OsR498G0306432300.01.T04 | 26S proteasome non-ATPase regulatory subunit 11                |
| augustus_masked-3-processed-gene-347.15-mRNA-1 | NA | Indica   |            | Os03g0576500 | OsR498G0306432500.01.T01 | PCI domain-containing protein                                  |
| augustus_masked-3-processed-gene-348.14-mRNA-1 | NA | Japonica |            | Os10g0391500 | OsR498G0306438100.01.T07 | Protein kinase domain-containing protein                       |

|                                                |    |          |            |              |                          |                                                                           |
|------------------------------------------------|----|----------|------------|--------------|--------------------------|---------------------------------------------------------------------------|
| augustus_masked-3-processed-gene-348.27-mRNA-1 | NA | NA       |            | 0            | OsR498G0100073600.01.T01 |                                                                           |
| augustus_masked-3-processed-gene-348.4-mRNA-1  | NA | NA       |            | 0            | OsR498G0613146100.01.T01 | OTU domain-containing protein                                             |
| augustus_masked-3-processed-gene-349.28-mRNA-1 | NA | NA       |            | Os03g0579000 | OsR498G0306440800.01.T01 | PDZ domain-containing protein (Fragment)                                  |
| augustus_masked-3-processed-gene-350.0-mRNA-1  | NA | NA       |            | 0            | OsR498G0306448100.01.T03 | Cytokinin-O-glucosyltransferase 2                                         |
| augustus_masked-3-processed-gene-350.4-mRNA-1  | NA | NA       |            | Os08g0381000 | OsR498G0510193500.01.T01 | Cell wall protein-like                                                    |
| augustus_masked-3-processed-gene-351.43-mRNA-1 | NA | NA       |            | 0            | OsR498G0306455700.01.T01 |                                                                           |
| augustus_masked-3-processed-gene-353.49-mRNA-1 | NA | NA       |            | Os03g0586900 | OsR498G0306468100.01.T01 | Putative DNA-binding protein, putative                                    |
| augustus_masked-3-processed-gene-353.52-mRNA-1 | NA | NA       |            | Os03g0587600 | OsR498G0306469500.01.T01 | CCHC-type domain-containing protein                                       |
| augustus_masked-3-processed-gene-354.0-mRNA-1  | NA | NA       |            | 0            | OsR498G0306472300.01.T01 | NAC domain-containing protein                                             |
| augustus_masked-3-processed-gene-354.1-mRNA-1  | NA | NA       |            | Os03g0588200 | OsR498G0306473300.01.T01 | Zinc finger E-box binding homeobox 1                                      |
| augustus_masked-3-processed-gene-354.27-mRNA-1 | NA | Indica   |            | Os03g0589100 | OsR498G0306476800.01.T01 | Retrotransposon protein, putative, Ty3-gypsy sub-class                    |
| augustus_masked-3-processed-gene-355.16-mRNA-1 | NA | Indica   |            | Os02g0315600 | OsR498G0306481700.01.T01 | BHLH domain-containing protein (Fragment)                                 |
| augustus_masked-3-processed-gene-355.23-mRNA-1 | NA | NA       |            | Os03g0589100 | OsR498G0306476800.01.T01 | Retrotransposon protein, putative, unclassified                           |
| augustus_masked-3-processed-gene-356.20-mRNA-1 | NA | NA       |            | Os03g0593100 | OsR498G0306486700.01.T01 |                                                                           |
| augustus_masked-3-processed-gene-357.20-mRNA-1 | NA | NA       |            |              |                          |                                                                           |
| augustus_masked-3-processed-gene-358.27-mRNA-1 | NA | NA       |            | Os03g0596700 | OsR498G0306497900.01.T01 |                                                                           |
| augustus_masked-3-processed-gene-359.24-mRNA-1 | NA | NA       |            | Os03g0597600 | OsR498G0306500800.01.T01 | N-terminal nucleophile aminohydrolases (Ntn hydrolases) superfamily prote |
| augustus_masked-3-processed-gene-359.6-mRNA-1  | NA | NA       |            | Os03g0597200 | OsR498G0306499400.01.T02 | Pentatricopeptide repeat-containing protein chloroplastic                 |
| augustus_masked-3-processed-gene-359.7-mRNA-1  | NA | NA       |            | Os03g0597400 | OsR498G0306500200.01.T01 | DUF1618 domain-containing protein (Fragment)                              |
| augustus_masked-3-processed-gene-360.14-mRNA-1 | NA | NA       | LRR-NBS-TM | Os03g0599400 |                          | Leucine Rich Repeat family protein, expressed                             |
| augustus_masked-3-processed-gene-360.9-mRNA-1  | NA | NA       |            | 0            | OsR498G0306507900.01.T01 | Ultraviolet-B receptor UVR8                                               |
| augustus_masked-3-processed-gene-361.16-mRNA-1 | NA | NA       |            | 0            | OsR498G0306510800.01.T02 | DUF295 domain-containing protein (Fragment)                               |
| augustus_masked-3-processed-gene-362.17-mRNA-1 | NA | NA       |            | Os03g0602300 | OsR498G0306516100.01.T01 | Brassinosteroid-6-oxidase                                                 |
| augustus_masked-3-processed-gene-362.31-mRNA-1 | NA | Indica   |            | Os03g0603300 | OsR498G0306521200.01.T02 | Transcription initiation factor TFIID subunit 8                           |
| augustus_masked-3-processed-gene-363.13-mRNA-1 | NA | Japonica |            | Os03g0603700 | OsR498G0100655000.01.T01 | Presenilin                                                                |
| augustus_masked-3-processed-gene-363.14-mRNA-1 | NA | Japonica |            | Os03g0603700 | OsR498G0306522900.01.T02 | Presenilin                                                                |
| augustus_masked-3-processed-gene-363.34-mRNA-1 | NA | NA       |            | Os03g0604200 | OsR498G0306523600.01.T01 | UDP-glucose 6-dehydrogenase 5                                             |
| augustus_masked-3-processed-gene-363.37-mRNA-1 | NA | NA       |            | 0            | OsR498G0917172900.01.T01 | Retrotransposon protein, putative, Ty3-gypsy sub-class                    |
| augustus_masked-3-processed-gene-363.38-mRNA-1 | NA | NA       |            |              |                          | Retrotransposon protein, putative, unclassified                           |
| augustus_masked-3-processed-gene-364.12-mRNA-1 | NA | Indica   |            | Os08g0130300 | OsR498G0306527200.01.T02 | Tetratricopeptide repeat (TPR)-like superfamily protein                   |
| augustus_masked-3-processed-gene-365.23-mRNA-1 | NA | NA       |            | Os03g0607700 | OsR498G0306537600.01.T01 | Zinc finger protein 1                                                     |
| augustus_masked-3-processed-gene-365.25-mRNA-1 | NA | NA       |            | Os03g0608000 |                          |                                                                           |
| augustus_masked-3-processed-gene-365.4-mRNA-1  | NA | NA       |            |              |                          | Metal transporter Nramp3                                                  |
| augustus_masked-3-processed-gene-367.19-mRNA-1 | NA | NA       |            | Os03g0610400 | OsR498G0306547800.01.T01 | C2H2 type zinc finger transcription factor ZFP31                          |
| augustus_masked-3-processed-gene-368.1-mRNA-1  | NA | Japonica |            | Os03g0612400 | OsR498G0306552900.01.T01 | LOB domain-containing protein 6                                           |
| augustus_masked-3-processed-gene-369.16-mRNA-1 | NA | NA       |            | Os07g0433200 | OsR498G0510328900.01.T01 |                                                                           |
| augustus_masked-3-processed-gene-369.17-mRNA-1 | NA | Japonica |            | Os03g0615300 | OsR498G0306500200.01.T01 | DUF1618 domain-containing protein (Fragment)                              |
| augustus_masked-3-processed-gene-370.34-mRNA-1 | NA | NA       |            | Os03g0616500 |                          |                                                                           |
| augustus_masked-3-processed-gene-371.5-mRNA-1  | NA | Japonica |            | Os03g0617700 | OsR498G0100564100.01.T01 |                                                                           |
| augustus_masked-3-processed-gene-372.30-mRNA-1 | NA | NA       |            | 0            | OsR498G0306572500.01.T01 | TF-B3 domain-containing protein                                           |
| augustus_masked-3-processed-gene-372.40-mRNA-1 | NA | NA       |            |              |                          | B3 domain-containing protein                                              |
| augustus_masked-3-processed-gene-373.22-mRNA-1 | NA | NA       |            | Os02g0212975 | OsR498G0202873200.01.T01 |                                                                           |
| augustus_masked-3-processed-gene-389.34-mRNA-1 | NA | NA       |            | Os03g0650400 | OsR498G0306678300.01.T05 | Elongation factor Tu GTP-binding domain-containing protein 1              |
| augustus_masked-3-processed-gene-389.35-mRNA-1 | NA | NA       |            | Os03g0650700 | OsR498G0306679300.01.T02 | Ribosomal protein S5/Elongation factor G/III/V family protein             |
| augustus_masked-3-processed-gene-389.43-mRNA-1 | NA | NA       |            | Os03g0650200 | OsR498G0306676600.01.T01 | Flavonoid 3'-monooxygenase                                                |
| augustus_masked-3-processed-gene-39.70-mRNA-1  | NA | NA       |            | 0            | OsR498G0305324200.01.T01 |                                                                           |
| augustus_masked-3-processed-gene-392.9-mRNA-1  | NA | NA       |            | Os03g0655500 | OsR498G0306697700.01.T01 | E3 ubiquitin-protein ligase KEG                                           |
| augustus_masked-3-processed-gene-393.42-mRNA-1 | NA | NA       |            | Os03g0657000 | OsR498G0306704300.01.T02 | TATA-box-binding protein isoform D                                        |
| augustus_masked-3-processed-gene-395.32-mRNA-1 | NA | Indica   |            | Os03g0659700 | OsR498G0306717700.01.T01 | LOB transcription factor                                                  |
| augustus_masked-3-processed-gene-395.34-mRNA-1 | NA | Indica   |            | Os06g0145950 | OsR498G0306718700.01.T01 |                                                                           |
| augustus_masked-3-processed-gene-395.41-mRNA-1 | NA | NA       |            | Os12g0626200 | OsR498G1222145600.01.T01 | SAUR14-auxin-responsive SAUR family member                                |
| augustus_masked-3-processed-gene-396.21-mRNA-1 | NA | NA       |            | Os03g0661500 | OsR498G0306727100.01.T01 | Protein kinase domain-containing protein                                  |
| augustus_masked-3-processed-gene-396.6-mRNA-1  | NA | NA       |            | 0            | OsR498G0306720500.01.T01 | Auxin-responsive protein SAUR40                                           |
| augustus_masked-3-processed-gene-397.1-mRNA-1  | NA | NA       |            | Os03g0661900 | OsR498G0306729500.01.T01 |                                                                           |
| augustus_masked-3-processed-gene-397.21-mRNA-1 | NA | Indica   |            | Os08g0546800 | OsR498G0306730800.01.T01 | Heat shock factor                                                         |
| augustus_masked-3-processed-gene-397.23-mRNA-1 | NA | NA       |            | Os03g0663400 | OsR498G0306732000.01.T01 | Osmotin 34                                                                |
| augustus_masked-3-processed-gene-398.0-mRNA-1  | NA | NA       |            |              |                          | F-box domain-containing protein (Fragment)                                |
| augustus_masked-3-processed-gene-398.1-mRNA-1  | NA | Indica   |            | Os03g0664400 | OsR498G0306737500.01.T01 | AAI domain-containing protein                                             |
| augustus_masked-3-processed-gene-398.13-mRNA-1 | NA | NA       |            | Os03g0665000 | OsR498G0306740100.01.T02 | Acetyltransferase, GNAT family protein, expressed                         |
| augustus_masked-3-processed-gene-398.14-mRNA-1 | NA | NA       |            | Os03g0665000 | OsR498G0306740100.01.T02 | Acyl-CoA N-acyltransferases (NAT) superfamily protein                     |
| augustus_masked-3-processed-gene-398.16-mRNA-1 | NA | NA       |            | 0            | OsR498G0306743300.01.T01 | Transposon protein, putative, CACTA, En/Spm sub-class                     |



|                                                |    |          |              |              |                          |                                                                        |
|------------------------------------------------|----|----------|--------------|--------------|--------------------------|------------------------------------------------------------------------|
| augustus_masked-3-processed-gene-399.0-mRNA-1  | NA | Japonica |              | Os03g0665700 | OsR498G0307042100.01.T01 |                                                                        |
| augustus_masked-3-processed-gene-399.25-mRNA-1 | NA | NA       |              | Os03g0666600 | OsR498G0306747200.01.T01 | Glycosyltransferase                                                    |
| augustus_masked-3-processed-gene-399.28-mRNA-1 | NA | NA       |              | 0            | OsR498G0204658700.01.T03 | Ribosomal protein-like                                                 |
| augustus_masked-3-processed-gene-400.22-mRNA-1 | NA | NA       |              | Os03g0667500 | OsR498G0306751800.01.T01 | Fe(2+) transport protein 1                                             |
| augustus_masked-3-processed-gene-400.23-mRNA-1 | NA | NA       |              | Os03g0667500 | OsR498G0306751800.01.T01 | Fe(2+) transport protein 1                                             |
| augustus_masked-3-processed-gene-400.36-mRNA-1 | NA | NA       |              | Os03g0668400 | OsR498G0306756900.01.T03 | PORR domain-containing protein (Fragment)                              |
| augustus_masked-3-processed-gene-401.47-mRNA-1 | NA | NA       |              | Os03g0670000 | OsR498G0306763700.01.T03 | DUF1713 domain-containing protein (Fragment)                           |
| augustus_masked-3-processed-gene-409.25-mRNA-1 | NA | Japonica |              | Os03g0683200 | OsR498G0306825400.01.T01 | rRNA N-glycosidase                                                     |
| augustus_masked-3-processed-gene-409.26-mRNA-1 | NA | Japonica |              | Os03g0683300 | OsR498G1019231300.01.T01 | rRNA N-glycosidase                                                     |
| augustus_masked-3-processed-gene-41.17-mRNA-1  | NA | Japonica |              | Os03g0183700 | OsR498G0305341900.01.T01 |                                                                        |
| augustus_masked-3-processed-gene-413.0-mRNA-1  | NA | NA       |              | Os03g0690500 | OsR498G0306837400.01.T01 | 2-oxoglutarate-dependent oxygenase                                     |
| augustus_masked-3-processed-gene-413.2-mRNA-1  | NA | NA       |              | Os03g0690600 | OsR498G0306837600.01.T09 | Scarecrow-like protein 9 isoform A                                     |
| augustus_masked-3-processed-gene-428.53-mRNA-1 | NA | NA       |              | 0            | OsR498G0306941000.01.T01 |                                                                        |
| augustus_masked-3-processed-gene-448.18-mRNA-1 | NA | Japonica |              | Os03g0753901 | OsR498G0305603400.01.T05 | Imidazole glycerol phosphate synthase hisHFc                           |
| augustus_masked-3-processed-gene-462.2-mRNA-1  | NA | NA       |              | Os03g0780600 | OsR498G0307152300.01.T02 | Tubulin beta chain                                                     |
| augustus_masked-3-processed-gene-462.21-mRNA-1 | NA | NA       |              | Os03g0782200 | OsR498G0307156300.01.T03 | RNA-binding protein 12-like                                            |
| augustus_masked-3-processed-gene-474.10-mRNA-1 | NA | NA       |              | Os03g0804700 | OsR498G0307232300.01.T01 | Germin-like protein 3-8                                                |
| augustus_masked-3-processed-gene-474.4-mRNA-1  | NA | NA       |              | Os03g0803900 | OsR498G0307229600.01.T07 | Hydroxyproline O-galactosyltransferase                                 |
| augustus_masked-3-processed-gene-474.9-mRNA-1  | NA | NA       |              | Os03g0804500 | OsR498G0307231500.01.T01 | Germin-like protein 3-7                                                |
| augustus_masked-3-processed-gene-475.57-mRNA-1 | NA | NA       |              | 0            | OsR498G0307239100.01.T01 | Thioredoxin domain-containing protein                                  |
| augustus_masked-3-processed-gene-475.58-mRNA-1 | NA | NA       |              | Os03g0806700 | OsR498G0307240900.01.T01 | DUF868 domain-containing protein                                       |
| augustus_masked-3-processed-gene-476.15-mRNA-1 | NA | NA       |              | Os03g0808200 | OsR498G0307245900.01.T01 | Glycosyltransferase                                                    |
| augustus_masked-3-processed-gene-476.8-mRNA-1  | NA | NA       |              | 0            | OsR498G0307242800.01.T01 | Pentatricopeptide repeat-containing protein                            |
| augustus_masked-3-processed-gene-489.15-mRNA-1 | NA | NA       |              | Os03g0835900 | OsR498G0307332500.01.T02 | Ferredoxin                                                             |
| augustus_masked-3-processed-gene-491.40-mRNA-1 | NA | Japonica |              | Os03g0840200 | OsR498G0307345500.01.T01 | PD40 domain-containing protein                                         |
| augustus_masked-3-processed-gene-491.53-mRNA-1 | NA | NA       |              | 0            | OsR498G0307132400.01.T01 |                                                                        |
| augustus_masked-3-processed-gene-493.61-mRNA-1 | NA | NA       |              | Os03g0843700 |                          |                                                                        |
| augustus_masked-3-processed-gene-493.78-mRNA-1 | NA | NA       |              | Os03g0845100 |                          | Transposon protein, putative, Mutator sub-class                        |
| augustus_masked-3-processed-gene-496.13-mRNA-1 | NA | Japonica |              | Os03g0850900 | OsR498G0306908200.01.T01 | Chemocyanin                                                            |
| augustus_masked-3-processed-gene-496.15-mRNA-1 | NA | NA       |              | Os03g0851200 | OsR498G0307374700.01.T01 | Monothiol glutaredoxin                                                 |
| augustus_masked-3-processed-gene-498.5-mRNA-1  | NA | NA       |              | Os03g0853700 | OsR498G0307382200.01.T02 | GCF domain-containing protein (Fragment)                               |
| augustus_masked-3-processed-gene-499.39-mRNA-1 | NA | NA       |              | Os01g0630700 | OsR498G0102324800.01.T02 | DUF223 domain-containing protein                                       |
| augustus_masked-3-processed-gene-502.17-mRNA-1 | NA | NA       |              | Os03g0861900 | OsR498G0307406100.01.T05 | Pentatricopeptide, putative                                            |
| augustus_masked-3-processed-gene-502.31-mRNA-1 | NA | NA       |              | Os03g0862000 |                          |                                                                        |
| augustus_masked-3-processed-gene-502.37-mRNA-1 | NA | NA       |              | 0            | OsR498G0307132400.01.T01 |                                                                        |
| augustus_masked-3-processed-gene-502.39-mRNA-1 | NA | NA       | Kinase-TM    | Os12g0427000 |                          | Cyclin-dependent kinase                                                |
| augustus_masked-3-processed-gene-502.42-mRNA-1 | NA | NA       |              | Os03g0862000 |                          |                                                                        |
| augustus_masked-3-processed-gene-502.9-mRNA-1  | NA | NA       |              | Os03g0861900 | OsR498G0307406100.01.T05 | Pentatricopeptide, putative                                            |
| augustus_masked-3-processed-gene-63.45-mRNA-1  | NA | NA       | Kinase-TM    | Os03g0225100 | OsR498G0305485800.01.T01 | Mitogen-activated protein kinase kinase                                |
| augustus_masked-3-processed-gene-67.30-mRNA-1  | NA | NA       |              | Os03g0230300 | OsR498G0305507900.01.T01 | PARP catalytic domain-containing protein                               |
| augustus_masked-3-processed-gene-91.38-mRNA-1  | NA | Indica   |              | Os01g0151100 | OsR498G0305680500.01.T03 | Putative translation initiation factor IF-2                            |
| augustus_masked-3-processed-gene-92.28-mRNA-1  | NA | NA       |              | Os03g0278900 | OsR498G0305687200.01.T04 | Putative ATP synthase, F0 complex, subunit b/b', bacterial/chloroplast |
| augustus_masked-3-processed-gene-92.6-mRNA-1   | NA | NA       |              | 0            | OsR498G0305683000.01.T01 | Cold shock protein Csp                                                 |
| augustus_masked-3-processed-gene-93.20-mRNA-1  | NA | Indica   |              | Os03g0281201 | OsR498G0305698000.01.T01 | inner nuclear membrane protein Man1 isoform X1                         |
| augustus_masked-3-processed-gene-94.36-mRNA-1  | NA | Japonica | Kinase-TM    | Os03g0281500 | OsR498G0305699500.01.T01 | Receptor-like protein kinase HERK 1                                    |
| augustus_masked-3-processed-gene-94.48-mRNA-1  | NA | NA       |              | Os03g0281900 | OsR498G0305701100.01.T01 | ATP-binding cassette protein subfamily G member 5                      |
| augustus_masked-3-processed-gene-94.49-mRNA-1  | NA | NA       |              | 0            | OsR498G0305701300.01.T01 | Small nuclear ribonucleoprotein Sm D2                                  |
| augustus_masked-3-processed-gene-94.53-mRNA-1  | NA | NA       |              | Os03g0282700 | OsR498G0305706100.01.T01 | Helicase ATP-binding domain-containing protein                         |
| augustus_masked-3-processed-gene-94.64-mRNA-1  | NA | NA       |              | Os03g0282201 |                          |                                                                        |
| augustus_masked-3-processed-gene-94.65-mRNA-1  | NA | NA       |              | Os03g0282300 |                          |                                                                        |
| augustus_masked-3-processed-gene-95.1-mRNA-1   | NA | NA       |              | 0            | OsR498G0305708700.01.T01 |                                                                        |
| augustus_masked-3-processed-gene-95.14-mRNA-1  | NA | Japonica |              | Os03g0284000 | OsR498G0305709700.01.T02 | Elongator complex protein 6                                            |
| augustus_masked-3-processed-gene-95.7-mRNA-1   | NA | NA       |              | Os03g0283500 | OsR498G0305708200.01.T05 | Pentatricopeptide repeat-containing protein                            |
| augustus_masked-4-processed-gene-1.41-mRNA-1   | NA | NA       |              | Os04g0173800 | OsR498G0407627000.01.T01 | Agglutinin isolectin 2                                                 |
| augustus_masked-4-processed-gene-101.5-mRNA-1  | NA | NA       |              | Os04g0332700 | OsR498G0408149200.01.T01 |                                                                        |
| augustus_masked-4-processed-gene-101.6-mRNA-1  | NA | Indica   |              | Os09g0317600 | OsR498G0408149800.01.T01 |                                                                        |
| augustus_masked-4-processed-gene-106.11-mRNA-1 | NA | Indica   |              | Os08g0364700 | OsR498G0408185800.01.T01 |                                                                        |
| augustus_masked-4-processed-gene-109.20-mRNA-1 | NA | NA       |              | 0            | OsR498G0408211200.01.T01 | Translation initiation factor                                          |
| augustus_masked-4-processed-gene-109.34-mRNA-1 | NA | NA       |              | 0            | OsR498G0408211200.01.T01 | Translation initiation factor                                          |
| augustus_masked-4-processed-gene-117.10-mRNA-1 | NA | NA       |              | Os04g0359300 | OsR498G0408267000.01.T01 | Cytosolic sulfotransferase 8                                           |
| augustus_masked-4-processed-gene-127.3-mRNA-1  | NA | Indica   | CC-Kinase-TM | Os04g0371700 | OsR498G0408350000.01.T01 | Wall-associated receptor kinase 3                                      |

|                                                |    |          |               |              |                          |                                                                              |
|------------------------------------------------|----|----------|---------------|--------------|--------------------------|------------------------------------------------------------------------------|
| augustus_masked-4-processed-gene-128.16-mRNA-1 | NA | NA       |               |              |                          | Reverse transcriptase domain-containing protein                              |
| augustus_masked-4-processed-gene-129.45-mRNA-1 | NA | NA       |               | 0            | OsR498G0407410100.01.T01 |                                                                              |
| augustus_masked-4-processed-gene-129.60-mRNA-1 | NA | NA       |               | Os08g0111800 | OsR498G0408366000.01.T01 | Putative acetyltransferase                                                   |
| augustus_masked-4-processed-gene-130.65-mRNA-1 | NA | NA       |               | 0            | OsR498G0408381200.01.T01 | DnaJ homolog subfamily C member 2                                            |
| augustus_masked-4-processed-gene-131.59-mRNA-1 | NA | NA       |               | 0            | OsR498G0408387600.01.T03 | SNF1-related protein kinase regulatory subunit gamma-1                       |
| augustus_masked-4-processed-gene-133.17-mRNA-1 | NA | NA       |               | Os04g0382900 | OsR498G0408404100.01.T01 |                                                                              |
| augustus_masked-4-processed-gene-133.18-mRNA-1 | NA | NA       |               | Os04g0383100 |                          |                                                                              |
| augustus_masked-4-processed-gene-137.21-mRNA-1 | NA | NA       |               | 0            | OsR498G0408432600.01.T01 |                                                                              |
| augustus_masked-4-processed-gene-146.19-mRNA-1 | NA | NA       |               | Os04g0403600 |                          | Protein-serine/threonine phosphatase                                         |
| augustus_masked-4-processed-gene-146.4-mRNA-1  | NA | NA       |               | 0            | OsR498G0101825000.01.T01 |                                                                              |
| augustus_masked-4-processed-gene-151.26-mRNA-1 | NA | NA       |               | Os04g0415401 |                          |                                                                              |
| augustus_masked-4-processed-gene-153.9-mRNA-1  | NA | NA       |               | 0            | OsR498G0408553000.01.T01 | Protein kinase domain-containing protein                                     |
| augustus_masked-4-processed-gene-154.33-mRNA-1 | NA | Japonica | Kinase-TM     | Os04g0420900 | OsR498G0408563300.01.T01 | Non-specific serine/threonine protein kinase (Fragment)                      |
| augustus_masked-4-processed-gene-161.40-mRNA-1 | NA | Indica   |               | Os04g0432900 | OsR498G0408600400.01.T01 | BTB/POZ and MATH domain-containing protein 1                                 |
| augustus_masked-4-processed-gene-161.41-mRNA-1 | NA | NA       |               | Os04g0433100 | OsR498G0408600600.01.T01 | BTB/POZ and MATH domain-containing protein 1                                 |
| augustus_masked-4-processed-gene-163.19-mRNA-1 | NA | NA       |               | Os04g0436350 | OsR498G0408611000.01.T03 | Pentatricopeptide repeat                                                     |
| augustus_masked-4-processed-gene-163.20-mRNA-1 | NA | NA       |               | Os04g0436800 | OsR498G0408612600.01.T01 | Pentatricopeptide repeat                                                     |
| augustus_masked-4-processed-gene-164.22-mRNA-1 | NA | NA       |               | 0            | OsR498G0408616200.01.T01 | SEC7 domain-containing protein                                               |
| augustus_masked-4-processed-gene-164.36-mRNA-1 | NA | NA       |               | 0            | OsR498G0408619000.01.T01 | Sialyltransferase-like protein 2                                             |
| augustus_masked-4-processed-gene-165.45-mRNA-1 | NA | NA       |               | 0            | OsR498G0408624800.01.T01 | F-box domain-containing protein                                              |
| augustus_masked-4-processed-gene-167.30-mRNA-1 | NA | NA       |               | Os04g0443700 | OsR498G0408639600.01.T02 | Glucuronoxylan 4-O-methyltransferase 1-like                                  |
| augustus_masked-4-processed-gene-173.34-mRNA-1 | NA | NA       |               | 0            | OsR498G0408681600.01.T02 | Sugar transport protein 5                                                    |
| augustus_masked-4-processed-gene-178.39-mRNA-1 | NA | NA       |               | 0            | OsR498G0408710200.01.T01 | Protein kinase domain-containing protein                                     |
| augustus_masked-4-processed-gene-178.40-mRNA-1 | NA | NA       |               | Os04g0462900 | OsR498G0408710600.01.T03 | Prohibitin                                                                   |
| augustus_masked-4-processed-gene-178.62-mRNA-1 | NA | NA       |               | Os05g0583900 | OsR498G0511415200.01.T01 | Pentatricopeptide repeat-containing protein                                  |
| augustus_masked-4-processed-gene-179.18-mRNA-1 | NA | NA       |               | Os04g0465100 | OsR498G0408720800.01.T01 | Peroxidase                                                                   |
| augustus_masked-4-processed-gene-179.23-mRNA-1 | NA | NA       |               | Os04g0465500 | OsR498G0408724400.01.T03 | Acetyltransferase, GNAT family protein                                       |
| augustus_masked-4-processed-gene-179.24-mRNA-1 | NA | NA       |               | 0            | OsR498G0511427100.01.T01 | Epstein-Barr virus EBNA-1-like                                               |
| augustus_masked-4-processed-gene-180.60-mRNA-1 | NA | NA       |               | 0            | OsR498G0204046800.01.T01 | Epstein-Barr virus EBNA-1-like                                               |
| augustus_masked-4-processed-gene-181.19-mRNA-1 | NA | NA       |               | 0            | OsR498G0408737800.01.T01 | Pentatricopeptide repeat-containing protein, chloroplastic                   |
| augustus_masked-4-processed-gene-188.50-mRNA-1 | NA | NA       |               | 0            | OsR498G0408777800.01.T01 |                                                                              |
| augustus_masked-4-processed-gene-19.25-mRNA-1  | NA | NA       |               | 0            | OsR498G0511427100.01.T01 | Epstein-Barr virus EBNA-1-like                                               |
| augustus_masked-4-processed-gene-190.76-mRNA-1 | NA | NA       |               | 0            | OsR498G0408795800.01.T01 | RING-H2 finger protein ATL5A                                                 |
| augustus_masked-4-processed-gene-190.80-mRNA-1 | NA | NA       |               | 0            | OsR498G0408797600.01.T01 | RING-type domain-containing protein                                          |
| augustus_masked-4-processed-gene-199.39-mRNA-1 | NA | NA       | Kinase-LRR-TM |              |                          | probable leucine-rich repeat receptor-like protein kinase At2g33170          |
| augustus_masked-4-processed-gene-201.11-mRNA-1 | NA | NA       |               | Os04g0508800 | OsR498G0408869400.01.T01 | Putative RING zinc finger and VWF domain family protein                      |
| augustus_masked-4-processed-gene-201.8-mRNA-1  | NA | NA       |               | Os04g0508400 |                          | NAC transcription factor                                                     |
| augustus_masked-4-processed-gene-202.26-mRNA-1 | NA | NA       |               | Os04g0510400 | OsR498G0408876800.01.T01 | DEAD-box ATP-dependent RNA helicase                                          |
| augustus_masked-4-processed-gene-202.6-mRNA-1  | NA | NA       |               | Os02g0582100 | OsR498G0408875200.01.T02 | TFIIIS N-terminal domain-containing protein                                  |
| augustus_masked-4-processed-gene-204.34-mRNA-1 | NA | NA       |               | 0            | OsR498G0408885400.01.T04 | Beta-glucosidase 46 isoform B                                                |
| augustus_masked-4-processed-gene-204.35-mRNA-1 | NA | Japonica |               | Os04g0514101 | OsR498G1120733700.01.T01 | Retrotransposon protein, putative, Ty3-gypsy sub-class                       |
| augustus_masked-4-processed-gene-204.39-mRNA-1 | NA | NA       |               | 0            | OsR498G0408887000.01.T01 | DUF295 domain-containing protein                                             |
| augustus_masked-4-processed-gene-206.53-mRNA-1 | NA | NA       |               | 0            | OsR498G0408669000.01.T01 | Leucine Rich Repeat family protein, expressed                                |
| augustus_masked-4-processed-gene-206.55-mRNA-1 | NA | NA       |               | 0            | OsR498G0511427100.01.T01 | Epstein-Barr virus EBNA-1-like                                               |
| augustus_masked-4-processed-gene-206.56-mRNA-1 | NA | NA       |               | Os04g0519100 |                          |                                                                              |
| augustus_masked-4-processed-gene-207.21-mRNA-1 | NA | NA       |               | Os04g0520700 | OsR498G0408916400.01.T01 | Senescence regulator                                                         |
| augustus_masked-4-processed-gene-209.41-mRNA-1 | NA | NA       |               | Os04g0523600 | OsR498G0408924200.01.T01 | Glycosyltransferase                                                          |
| augustus_masked-4-processed-gene-211.40-mRNA-1 | NA | NA       |               | Os04g0528800 | OsR498G0408944800.01.T01 | Ferredoxin-thioredoxin reductase, variable chain                             |
| augustus_masked-4-processed-gene-214.52-mRNA-1 | NA | NA       |               | Os04g0535200 |                          | Aspartic proteinase nepenthesin-1                                            |
| augustus_masked-4-processed-gene-216.9-mRNA-1  | NA | NA       |               | Os04g0538400 | OsR498G0408984200.01.T01 | Vacuolar iron transporter                                                    |
| augustus_masked-4-processed-gene-217.18-mRNA-1 | NA | NA       |               | 0            | OsR498G0510643100.01.T01 | Ulp1 protease family, C-terminal catalytic domain containing protein, expres |
| augustus_masked-4-processed-gene-226.44-mRNA-1 | NA | NA       |               | 0            | OsR498G0204046800.01.T01 | Circumsporozoite protein-like                                                |
| augustus_masked-4-processed-gene-226.51-mRNA-1 | NA | NA       |               | Os04g0559000 | OsR498G0409063400.01.T01 | Subtilisin-like protease                                                     |
| augustus_masked-4-processed-gene-227.65-mRNA-1 | NA | NA       |               | Os04g0560100 | OsR498G0409067000.01.T01 | Cytochrome P450, family 86, subfamily A, polypeptide 8                       |
| augustus_masked-4-processed-gene-230.23-mRNA-1 | NA | Indica   |               | Os02g0670900 | OsR498G0409082600.01.T01 | Amino acid transporter like                                                  |
| augustus_masked-4-processed-gene-230.27-mRNA-1 | NA | Indica   |               | Os04g0566000 | OsR498G0409083800.01.T03 | Nucleotide-diphospho-sugar transferase family protein (Fragment)             |
| augustus_masked-4-processed-gene-232.22-mRNA-1 | NA | Indica   |               | Os02g0673700 | OsR498G0409093200.01.T04 | Dof zinc finger protein 1                                                    |
| augustus_masked-4-processed-gene-235.67-mRNA-1 | NA | NA       |               | Os04g0573300 |                          | Subtilisin-like serine protease                                              |
| augustus_masked-4-processed-gene-251.10-mRNA-1 | NA | NA       |               | 0            | OsR498G0409229800.01.T01 | Isoaspartyl peptidase/L-asparaginase                                         |
| augustus_masked-4-processed-gene-252.40-mRNA-1 | NA | NA       |               | 0            | OsR498G0409238800.01.T01 |                                                                              |
| augustus_masked-4-processed-gene-261.39-mRNA-1 | NA | NA       | Kinase-TM     | Os04g0619600 | OsR498G0409294000.01.T01 | Mitogen-activated protein kinase kinase kinase                               |

|                                                |    |          |              |              |                          |                                                              |
|------------------------------------------------|----|----------|--------------|--------------|--------------------------|--------------------------------------------------------------|
| augustus_masked-4-processed-gene-269.30-mRNA-1 | NA | NA       |              | Os04g0635800 | OsR498G0409343400.01.T01 | N-terminal acetyltransferase complex ARD1 subunit A          |
| augustus_masked-4-processed-gene-270.6-mRNA-1  | NA | NA       |              | Os04g0636900 | OsR498G0409346400.01.T03 | UBP1-associated protein 2A                                   |
| augustus_masked-4-processed-gene-277.81-mRNA-1 | NA | NA       |              | Os04g0652400 | OsR498G0409398000.01.T07 | Anti-sigma factor antagonist domain of sulfate transporter91 |
| augustus_masked-4-processed-gene-281.24-mRNA-1 | NA | NA       |              | 0            | OsR498G0204046800.01.T01 | Epstein-Barr virus EBNA-1-like                               |
| augustus_masked-4-processed-gene-284.50-mRNA-1 | NA | NA       |              | Os04g0663300 | OsR498G0409438200.01.T03 | PHD finger-like domain-containing protein 5b-like            |
| augustus_masked-4-processed-gene-286.79-mRNA-1 | NA | Indica   |              | Os04g0668000 | OsR498G0409456800.01.T01 |                                                              |
| augustus_masked-4-processed-gene-287.8-mRNA-1  | NA | NA       |              | Os04g0668700 | OsR498G0409458800.01.T02 | Phosphatidylinositol 4-kinase type 2-beta                    |
| augustus_masked-4-processed-gene-298.7-mRNA-1  | NA | NA       |              | 0            | OsR498G0511427100.01.T01 | Epstein-Barr virus EBNA-1-like                               |
| augustus_masked-4-processed-gene-39.16-mRNA-1  | NA | NA       |              | Os02g0749000 | OsR498G0815725100.01.T05 | AAA domain-containing protein                                |
| augustus_masked-4-processed-gene-40.25-mRNA-1  | NA | NA       |              | Os04g0243700 | OsR498G0407811800.01.T01 | RING-H2 finger protein ATL12                                 |
| augustus_masked-4-processed-gene-45.12-mRNA-1  | NA | NA       |              | Os04g0309500 |                          |                                                              |
| augustus_masked-4-processed-gene-49.24-mRNA-1  | NA | Japonica |              | Os04g0257500 | OsR498G0407853000.01.T01 | AP2 domain class transcription factor                        |
| augustus_masked-4-processed-gene-51.9-mRNA-1   | NA | Japonica |              | Os04g0258900 | OsR498G0407867000.01.T01 | F-box domain-containing protein                              |
| augustus_masked-4-processed-gene-55.20-mRNA-1  | NA | NA       |              | Os04g0267000 | OsR498G0407887800.01.T01 | FBD domain-containing protein                                |
| augustus_masked-4-processed-gene-55.22-mRNA-1  | NA | Indica   |              | Os04g0267600 | OsR498G0407891700.01.T01 | FBD domain-containing protein                                |
| augustus_masked-4-processed-gene-76.3-mRNA-1   | NA | NA       |              | Os04g0299500 |                          |                                                              |
| augustus_masked-4-processed-gene-82.29-mRNA-1  | NA | NA       |              | Os04g0309500 |                          |                                                              |
| augustus_masked-4-processed-gene-84.30-mRNA-1  | NA | NA       |              | Os04g0312100 | OsR498G0408030600.01.T03 | PORR domain-containing protein (Fragment)                    |
| augustus_masked-4-processed-gene-85.18-mRNA-1  | NA | NA       |              | 0            | OsR498G1221660400.01.T01 |                                                              |
| augustus_masked-4-processed-gene-86.23-mRNA-1  | NA | NA       |              | Os04g0313500 |                          | F-box domain-containing protein                              |
| augustus_masked-4-processed-gene-89.15-mRNA-1  | NA | NA       |              | Os04g0329300 | OsR498G0408139100.01.T01 | Expansin-like CBD domain-containing protein                  |
| augustus_masked-4-processed-gene-89.26-mRNA-1  | NA | NA       |              | Os08g0381000 | OsR498G0612780600.01.T01 | Cell wall protein-like                                       |
| augustus_masked-4-processed-gene-89.27-mRNA-1  | NA | NA       |              | Os08g0381000 | OsR498G0612780600.01.T01 | Cell wall protein-like                                       |
| augustus_masked-4-processed-gene-94.10-mRNA-1  | NA | NA       |              | 0            | OsR498G0408109200.01.T01 | SRF-type transcription factor family protein                 |
| augustus_masked-4-processed-gene-94.4-mRNA-1   | NA | NA       |              | 0            | OsR498G0204226400.01.T01 | Plant disease resistance polypprotein-like                   |
| augustus_masked-4-processed-gene-95.3-mRNA-1   | NA | NA       |              | Os04g0319800 | OsR498G0408115800.01.T01 | Glycosyltransferase                                          |
| augustus_masked-4-processed-gene-97.11-mRNA-1  | NA | NA       |              | Os04g0319800 | OsR498G0408115800.01.T01 | Glycosyltransferase                                          |
| augustus_masked-4-processed-gene-97.9-mRNA-1   | NA | NA       |              | 0            | OsR498G0408971400.01.T01 | Secondary wall NAC master switch                             |
| augustus_masked-5-processed-gene-1.11-mRNA-1   | NA | NA       |              | Os05g0102300 |                          | Putative AC transposase                                      |
| augustus_masked-5-processed-gene-109.42-mRNA-1 | NA | NA       |              | Os05g0270400 | OsR498G0510225500.01.T03 | Type 1 phosphatases regulator like                           |
| augustus_masked-5-processed-gene-109.43-mRNA-1 | NA | NA       |              | 0            | OsR498G0510225900.01.T01 |                                                              |
| augustus_masked-5-processed-gene-110.11-mRNA-1 | NA | Indica   |              | Os01g0248000 | OsR498G0510230500.01.T01 | Stigma-specific STIG1-like protein 4                         |
| augustus_masked-5-processed-gene-110.25-mRNA-1 | NA | NA       |              | Os05g0271900 | OsR498G0510234100.01.T01 | Pentatricopeptide repeat-containing protein                  |
| augustus_masked-5-processed-gene-120.14-mRNA-1 | NA | NA       |              | 0            | OsR498G0510286200.01.T02 |                                                              |
| augustus_masked-5-processed-gene-121.10-mRNA-1 | NA | NA       |              | Os05g0283200 | OsR498G0510294300.01.T01 | PMEI domain-containing protein                               |
| augustus_masked-5-processed-gene-123.7-mRNA-1  | NA | NA       |              | Os05g0286100 |                          | probable transcriptional regulator RABBIT EARS               |
| augustus_masked-5-processed-gene-126.11-mRNA-1 | NA | Japonica | Kinase-TM    | Os05g0317700 | OsR498G0510480600.01.T01 | Receptor-like protein kinase FERONIA                         |
| augustus_masked-5-processed-gene-126.9-mRNA-1  | NA | Japonica | Kinase-TM    | Os05g0317700 | OsR498G0510480600.01.T01 | Receptor-like protein kinase FERONIA                         |
| augustus_masked-5-processed-gene-127.20-mRNA-1 | NA | NA       |              | 0            | OsR498G0510594200.01.T01 | RNase H domain-containing protein (Fragment)                 |
| augustus_masked-5-processed-gene-134.23-mRNA-1 | NA | NA       |              | 0            | OsR498G0510176600.01.T01 | Retrotransposon protein, putative, Ty3-gypsy sub-class       |
| augustus_masked-5-processed-gene-134.24-mRNA-1 | NA | NA       |              | 0            | OsR498G0510365500.01.T01 |                                                              |
| augustus_masked-5-processed-gene-136.35-mRNA-1 | NA | Indica   |              | Os05g0319900 | OsR498G0510374400.01.T01 | Endo-1,4-beta-xylanase                                       |
| augustus_masked-5-processed-gene-146.21-mRNA-1 | NA | NA       |              | Os05g0311000 | OsR498G0510437500.01.T06 | Coatomer subunit delta                                       |
| augustus_masked-5-processed-gene-150.18-mRNA-1 | NA | NA       |              | Os12g0468900 | OsR498G0917373300.01.T01 | Cell wall protein-like                                       |
| augustus_masked-5-processed-gene-151.19-mRNA-1 | NA | Japonica | Kinase-TM    | Os05g0317700 | OsR498G0510480600.01.T01 | Receptor-like protein kinase FERONIA                         |
| augustus_masked-5-processed-gene-155.12-mRNA-1 | NA | NA       |              | Os05g0324000 | OsR498G0510496700.01.T01 | collagen alpha-1(V) chain-like isoform X1                    |
| augustus_masked-5-processed-gene-155.13-mRNA-1 | NA | NA       |              | Os05g0324300 |                          | DUF4220 domain-containing protein (Fragment)                 |
| augustus_masked-5-processed-gene-159.0-mRNA-1  | NA | NA       |              | Os05g0329100 | OsR498G0510518700.01.T01 | Putative prolamin 7                                          |
| augustus_masked-5-processed-gene-159.10-mRNA-1 | NA | NA       |              | Os05g0329100 | OsR498G0510519500.01.T01 | Putative prolamin 7                                          |
| augustus_masked-5-processed-gene-159.11-mRNA-1 | NA | NA       |              | Os05g0329100 | OsR498G0510519700.01.T01 | Putative prolamin 7                                          |
| augustus_masked-5-processed-gene-159.12-mRNA-1 | NA | NA       |              | Os05g0329100 | OsR498G0510519700.01.T01 | Putative prolamin 7                                          |
| augustus_masked-5-processed-gene-159.13-mRNA-1 | NA | NA       |              | Os05g0329400 | OsR498G0510519700.01.T01 | Putative prolamin 7                                          |
| augustus_masked-5-processed-gene-159.8-mRNA-1  | NA | NA       |              | Os05g0329100 | OsR498G0510519700.01.T01 | Putative prolamin 7                                          |
| augustus_masked-5-processed-gene-160.0-mRNA-1  | NA | NA       |              | Os05g0329400 | OsR498G0510521700.01.T01 | Putative prolamin 7                                          |
| augustus_masked-5-processed-gene-168.18-mRNA-1 | NA | NA       | CC-Kinase-TM | 0            | OsR498G0510577100.01.T01 | Receptor-like protein kinase FERONIA                         |
| augustus_masked-5-processed-gene-174.25-mRNA-1 | NA | NA       |              | 0            | OsR498G0510611300.01.T01 | RING-H2 finger protein ATL5H                                 |
| augustus_masked-5-processed-gene-176.24-mRNA-1 | NA | Japonica |              | Os05g0355200 | OsR498G0510623700.01.T02 | Pentatricopeptide repeat-containing protein mitochondrial    |
| augustus_masked-5-processed-gene-179.17-mRNA-1 | NA | Japonica |              | Os05g0361000 | OsR498G0510653900.01.T01 | Putative ferulate 5-hydroxylase                              |
| augustus_masked-5-processed-gene-185.33-mRNA-1 | NA | NA       |              | Os05g0368000 | OsR498G0510682900.01.T01 | NRR repressor 1                                              |
| augustus_masked-5-processed-gene-187.18-mRNA-1 | NA | Indica   |              | Os05g0369300 | OsR498G0510689700.01.T01 |                                                              |
| augustus_masked-5-processed-gene-191.2-mRNA-1  | NA | NA       |              | Os04g0498800 | OsR498G0408834700.01.T05 | Cell division control protein B                              |

|                                                |    |          |           |              |                          |                                                                   |
|------------------------------------------------|----|----------|-----------|--------------|--------------------------|-------------------------------------------------------------------|
| augustus_masked-5-processed-gene-194.27-mRNA-1 | NA | Indica   |           | Os05g0381700 | OsR498G0510736300.01.T01 | Plant calmodulin-binding protein-related                          |
| augustus_masked-5-processed-gene-194.29-mRNA-1 | NA | NA       |           | 0            | OsR498G0510737300.01.T01 |                                                                   |
| augustus_masked-5-processed-gene-2.69-mRNA-1   | NA | Japonica | LRR-TM    | Os05g0104600 | OsR498G0509566700.01.T01 | Polygalacturonase inhibitor                                       |
| augustus_masked-5-processed-gene-20.46-mRNA-1  | NA | NA       |           | Os05g0135700 | OsR498G0509688100.01.T02 | S-adenosylmethionine synthase                                     |
| augustus_masked-5-processed-gene-215.17-mRNA-1 | NA | Indica   |           | Os05g0417700 | OsR498G0510852300.01.T01 |                                                                   |
| augustus_masked-5-processed-gene-222.18-mRNA-1 | NA | NA       |           | Os05g0430800 | OsR498G0510899100.01.T01 | Amidophosphoribosyltransferase                                    |
| augustus_masked-5-processed-gene-224.3-mRNA-1  | NA | NA       |           | Os05g0434200 | OsR498G0510908700.01.T01 |                                                                   |
| augustus_masked-5-processed-gene-224.5-mRNA-1  | NA | NA       |           | 0            | OsR498G0510908900.01.T01 |                                                                   |
| augustus_masked-5-processed-gene-225.1-mRNA-1  | NA | Indica   |           | Os05g0436400 | OsR498G0510915300.01.T07 | Signal peptide peptidase                                          |
| augustus_masked-5-processed-gene-225.19-mRNA-1 | NA | Indica   |           | Os05g0437133 | OsR498G0510917300.01.T01 | Ethylene-responsive transcription factor                          |
| augustus_masked-5-processed-gene-226.0-mRNA-1  | NA | NA       |           | Os11g0636200 | OsR498G1120596000.01.T03 |                                                                   |
| augustus_masked-5-processed-gene-226.17-mRNA-1 | NA | NA       |           | Os06g0688500 |                          | BTB domain-containing protein                                     |
| augustus_masked-5-processed-gene-226.19-mRNA-1 | NA | NA       |           | Os05g0439400 | OsR498G0510925700.01.T01 | U-box domain-containing protein 29                                |
| augustus_masked-5-processed-gene-261.53-mRNA-1 | NA | Indica   |           | Os05g0507300 | OsR498G0511143700.01.T02 | Calreticulin                                                      |
| augustus_masked-5-processed-gene-27.1-mRNA-1   | NA | NA       |           | 0            | OsR498G0509733700.01.T01 | Protease Do-like protein 2, chloroplastic                         |
| augustus_masked-5-processed-gene-274.56-mRNA-1 | NA | NA       |           | 0            | OsR498G0511229900.01.T01 |                                                                   |
| augustus_masked-5-processed-gene-277.2-mRNA-1  | NA | NA       |           | Os05g0535500 | OsR498G0511248100.01.T07 | tRNA(His) guanylyltransferase                                     |
| augustus_masked-5-processed-gene-279.0-mRNA-1  | NA | Indica   |           | Os05g0539300 | OsR498G0511260900.01.T01 | DUF295 domain-containing protein                                  |
| augustus_masked-5-processed-gene-279.1-mRNA-1  | NA | Indica   |           | Os05g0539300 | OsR498G0511261300.01.T01 | DUF295 domain-containing protein                                  |
| augustus_masked-5-processed-gene-279.2-mRNA-1  | NA | NA       |           | Os05g0539300 | OsR498G0511262700.01.T01 | DUF295 domain-containing protein                                  |
| augustus_masked-5-processed-gene-280.62-mRNA-1 | NA | NA       |           | Os05g0542500 | OsR498G0511271700.01.T01 | Late Embryogenesis Abundant                                       |
| augustus_masked-5-processed-gene-280.65-mRNA-1 | NA | NA       |           | Os05g0542800 | OsR498G0511272500.01.T06 | Polygalacturonase                                                 |
| augustus_masked-5-processed-gene-282.0-mRNA-1  | NA | NA       |           | Os05g0545500 | OsR498G0511283900.01.T02 | FHA domain-containing protein DDL                                 |
| augustus_masked-5-processed-gene-283.56-mRNA-1 | NA | NA       |           | Os05g0549300 | OsR498G0511290700.01.T01 | wiskott-Aldrich syndrome protein family member 2-like             |
| augustus_masked-5-processed-gene-283.60-mRNA-1 | NA | NA       |           | Os05g0549700 | OsR498G0511291300.01.T01 | Threonine synthase, chloroplastic                                 |
| augustus_masked-5-processed-gene-284.0-mRNA-1  | NA | NA       |           | Os05g0549800 | OsR498G0511292500.01.T01 | AP2/ERF and B3 domain-containing transcription repressor TEM1     |
| augustus_masked-5-processed-gene-285.8-mRNA-1  | NA | NA       |           | Os05g0552600 | OsR498G0511305300.01.T01 | Root cap periphery protein 2                                      |
| augustus_masked-5-processed-gene-286.37-mRNA-1 | NA | NA       |           |              |                          | t-SNARE coiled-coil homology domain-containing protein (Fragment) |
| augustus_masked-5-processed-gene-289.12-mRNA-1 | NA | NA       |           | Os05g0560600 | OsR498G0511335100.01.T01 | 6b-interacting protein 1                                          |
| augustus_masked-5-processed-gene-296.0-mRNA-1  | NA | NA       |           | Os05g0571600 | OsR498G0511373500.01.T01 |                                                                   |
| augustus_masked-5-processed-gene-299.37-mRNA-1 | NA | NA       |           | Os05g0578500 | OsR498G0511397100.01.T02 | Cinnamoyl-CoA reductase-like SNL6                                 |
| augustus_masked-5-processed-gene-3.56-mRNA-1   | NA | Indica   |           | Os01g0888500 | OsR498G0509568900.01.T03 | Formylglycinamide ribonucleotide amidotransferase                 |
| augustus_masked-5-processed-gene-3.57-mRNA-1   | NA | Japonica | LRR-TM    | Os05g0104700 | OsR498G0509566700.01.T01 | Polygalacturonase inhibitor                                       |
| augustus_masked-5-processed-gene-308.0-mRNA-1  | NA | NA       |           | Os05g0596000 |                          | Peptidase A1 domain-containing protein                            |
| augustus_masked-5-processed-gene-308.18-mRNA-1 | NA | NA       |           | Os05g0596500 | OsR498G0511459500.01.T01 | Putative RING-H2 finger protein ATL12                             |
| augustus_masked-5-processed-gene-311.1-mRNA-1  | NA | NA       |           |              |                          |                                                                   |
| augustus_masked-5-processed-gene-312.0-mRNA-1  | NA | NA       |           | Os02g0540000 | OsR498G1019218100.01.T01 | Putative RING-H2 finger protein ATL53                             |
| augustus_masked-5-processed-gene-38.0-mRNA-1   | NA | NA       |           | Os05g0165200 | OsR498G0509806700.01.T01 | 6,7-dimethyl-8-ribityllumazine synthase                           |
| augustus_masked-5-processed-gene-4.1-mRNA-1    | NA | Indica   |           | Os05g0106700 | OsR498G0509574900.01.T01 | E3 ubiquitin-protein ligase HERC2                                 |
| augustus_masked-5-processed-gene-4.2-mRNA-1    | NA | NA       |           |              |                          | Retrotransposon protein, putative, unclassified, expressed        |
| augustus_masked-5-processed-gene-44.24-mRNA-1  | NA | NA       |           | Os03g0850900 | OsR498G0306908200.01.T01 | Chemocyanin                                                       |
| augustus_masked-5-processed-gene-44.26-mRNA-1  | NA | NA       |           | Os03g0851200 | OsR498G0307374700.01.T01 | Monothiol glutaredoxin                                            |
| augustus_masked-5-processed-gene-45.45-mRNA-1  | NA | NA       |           | 0            | OsR498G1221765900.01.T01 | Interactor of constitutive active ROPs 2, chloroplastic           |
| augustus_masked-5-processed-gene-49.33-mRNA-1  | NA | NA       |           | Os05g0181800 |                          |                                                                   |
| augustus_masked-5-processed-gene-52.27-mRNA-1  | NA | Indica   |           | Os01g0187400 | OsR498G0509887900.01.T01 | zf-RVT domain-containing protein                                  |
| augustus_masked-5-processed-gene-52.34-mRNA-1  | NA | NA       |           | 0            | OsR498G0509892100.01.T01 |                                                                   |
| augustus_masked-5-processed-gene-53.36-mRNA-1  | NA | Japonica |           | Os05g0187500 | OsR498G0509898500.01.T01 | IQ-domain 25                                                      |
| augustus_masked-5-processed-gene-58.31-mRNA-1  | NA | Japonica |           | Os05g0457000 | OsR498G0202873200.01.T01 |                                                                   |
| augustus_masked-5-processed-gene-59.17-mRNA-1  | NA | Indica   |           | Os05g0198200 | OsR498G0509943900.01.T03 | Monothiol glutaredoxin-S2                                         |
| augustus_masked-5-processed-gene-62.19-mRNA-1  | NA | Indica   |           | Os12g0117400 | OsR498G0509966100.01.T01 | NPH3 domain-containing protein                                    |
| augustus_masked-5-processed-gene-63.9-mRNA-1   | NA | NA       |           | Os05g0203500 | OsR498G0509974900.01.T01 | DDE Tnp4 domain-containing protein                                |
| augustus_masked-5-processed-gene-66.0-mRNA-1   | NA | Japonica |           | Os05g0207200 | OsR498G0509990300.01.T01 | Putative pentatricopeptide repeat-containing protein isoform A    |
| augustus_masked-5-processed-gene-74.10-mRNA-1  | NA | NA       |           | Os05g0220500 |                          |                                                                   |
| augustus_masked-5-processed-gene-76.11-mRNA-1  | NA | NA       | Kinase-TM | Os05g0224700 | OsR498G0510060100.01.T01 | Non-specific serine/threonine protein kinase                      |
| augustus_masked-5-processed-gene-77.13-mRNA-1  | NA | NA       |           |              |                          | Glycine-rich rna-binding protein                                  |
| augustus_masked-6-processed-gene-10.26-mRNA-1  | NA | NA       |           | 0            | OsR498G0611522700.01.T01 |                                                                   |
| augustus_masked-6-processed-gene-10.28-mRNA-1  | NA | NA       |           | Os06g0119100 |                          | DUF4220 domain-containing protein (Fragment)                      |
| augustus_masked-6-processed-gene-10.31-mRNA-1  | NA | NA       |           | Os07g0543700 | OsR498G0408675500.01.T01 | Retrotransposon protein, putative, Ty3-gypsy sub-class            |
| augustus_masked-6-processed-gene-10.47-mRNA-1  | NA | NA       |           | Os06g0118800 |                          |                                                                   |
| augustus_masked-6-processed-gene-100.26-mRNA-1 | NA | NA       | Kinase-TM | Os06g0285400 |                          | Clade XIV lectin receptor kinase                                  |
| augustus_masked-6-processed-gene-100.33-mRNA-1 | NA | Indica   |           | Os06g0272601 | OsR498G0612151000.01.T01 |                                                                   |

|                                                |    |          |        |              |                          |                                                                              |
|------------------------------------------------|----|----------|--------|--------------|--------------------------|------------------------------------------------------------------------------|
| augustus_masked-6-processed-gene-102.16-mRNA-1 | NA | NA       |        |              |                          | Putative NBS-LRR disease resistance protein (Fragment)                       |
| augustus_masked-6-processed-gene-102.3-mRNA-1  | NA | NA       | NBS-TM | 0            | OsR498G0612165700.01.T01 | Disease resistance protein RPM1                                              |
| augustus_masked-6-processed-gene-103.24-mRNA-1 | NA | Indica   |        | Os06g0289900 | OsR498G0612168500.01.T01 | C-glycosyltransferase                                                        |
| augustus_masked-6-processed-gene-103.30-mRNA-1 | NA | NA       |        | Os06g0289900 | OsR498G0612168000.01.T01 | Glycosyltransferase                                                          |
| augustus_masked-6-processed-gene-104.35-mRNA-1 | NA | Indica   |        | Os06g0292400 | OsR498G0612172800.01.T02 | PGG domain-containing protein                                                |
| augustus_masked-6-processed-gene-11.0-mRNA-1   | NA | NA       |        | Os06g0119900 | OsR498G0611527900.01.T01 |                                                                              |
| augustus_masked-6-processed-gene-11.1-mRNA-1   | NA | NA       |        | Os06g0120200 | OsR498G0611529100.01.T01 | DUF4220 domain-containing protein (Fragment)                                 |
| augustus_masked-6-processed-gene-11.11-mRNA-1  | NA | NA       |        | Os06g0119800 | OsR498G0611527800.01.T01 |                                                                              |
| augustus_masked-6-processed-gene-11.22-mRNA-1  | NA | NA       |        | Os06g0121000 |                          |                                                                              |
| augustus_masked-6-processed-gene-11.23-mRNA-1  | NA | NA       |        | Os06g0121200 | OsR498G0611532700.01.T01 | DUF4220 domain-containing protein (Fragment)                                 |
| augustus_masked-6-processed-gene-11.24-mRNA-1  | NA | NA       |        | 0            | OsR498G0611534300.01.T01 |                                                                              |
| augustus_masked-6-processed-gene-11.28-mRNA-1  | NA | Japonica |        | Os06g0122200 | OsR498G0611529100.01.T01 | DUF4220 domain-containing protein (Fragment)                                 |
| augustus_masked-6-processed-gene-11.40-mRNA-1  | NA | NA       |        | 0            | OsR498G0611532400.01.T01 |                                                                              |
| augustus_masked-6-processed-gene-11.41-mRNA-1  | NA | NA       |        | Os06g0121300 | OsR498G0611534200.01.T01 |                                                                              |
| augustus_masked-6-processed-gene-12.12-mRNA-1  | NA | NA       |        | 0            | OsR498G0611540700.01.T01 |                                                                              |
| augustus_masked-6-processed-gene-13.0-mRNA-1   | NA | NA       |        | Os06g0124300 | OsR498G0611544100.01.T01 | DUF4220 domain-containing protein (Fragment)                                 |
| augustus_masked-6-processed-gene-13.1-mRNA-1   | NA | NA       |        | Os06g0124400 |                          | Induced stolen tip protein TUB8-like                                         |
| augustus_masked-6-processed-gene-13.13-mRNA-1  | NA | NA       |        | Os06g0125300 | OsR498G0611547300.01.T02 | Pentatricopeptide repeat-containing protein mitochondrial                    |
| augustus_masked-6-processed-gene-13.26-mRNA-1  | NA | NA       |        | Os06g0125500 | OsR498G0611548600.01.T02 | Sexual differentiation process protein isp4-like                             |
| augustus_masked-6-processed-gene-14.45-mRNA-1  | NA | NA       |        | Os06g0126500 | OsR498G0611551300.01.T03 | BAG family molecular chaperone regulator 3                                   |
| augustus_masked-6-processed-gene-14.47-mRNA-1  | NA | NA       |        | Os06g0127000 | OsR498G0611552100.01.T05 | Peroxisomal membrane protein like                                            |
| augustus_masked-6-processed-gene-14.48-mRNA-1  | NA | NA       |        | Os06g0127100 | OsR498G0611552700.01.T01 | Dehydration-responsive element-binding protein 1E                            |
| augustus_masked-6-processed-gene-14.52-mRNA-1  | NA | NA       |        | Os06g0127900 | OsR498G0611554900.01.T01 | Ribonucleoside-diphosphate reductase small chain like                        |
| augustus_masked-6-processed-gene-14.66-mRNA-1  | NA | NA       |        | 0            | OsR498G0611551600.01.T01 |                                                                              |
| augustus_masked-6-processed-gene-14.69-mRNA-1  | NA | NA       |        | Os06g0127800 | OsR498G0611554400.01.T01 | Scarecrow-like protein 28 isoform A                                          |
| augustus_masked-6-processed-gene-144.5-mRNA-1  | NA | NA       |        | Os06g0356800 | OsR498G0612478700.01.T01 | Xylanase inhibitor protein I                                                 |
| augustus_masked-6-processed-gene-146.8-mRNA-1  | NA | NA       |        | Os08g0398400 | OsR498G0816027300.01.T06 | Hypersensitive-induced response protein 1                                    |
| augustus_masked-6-processed-gene-147.12-mRNA-1 | NA | NA       |        | Os06g0362100 |                          |                                                                              |
| augustus_masked-6-processed-gene-15.0-mRNA-1   | NA | Indica   |        | Os02g0675700 | OsR498G0611555700.01.T01 | Methyltransferase                                                            |
| augustus_masked-6-processed-gene-15.10-mRNA-1  | NA | NA       |        | Os06g0129000 | OsR498G0611558300.01.T01 |                                                                              |
| augustus_masked-6-processed-gene-15.12-mRNA-1  | NA | Indica   |        | Os04g0573000 | OsR498G0611560300.01.T01 | SPX domain-containing membrane protein isoform A                             |
| augustus_masked-6-processed-gene-16.54-mRNA-1  | NA | NA       |        | Os06g0130600 | OsR498G0611565400.01.T02 | Barley B recombinant-like protein D                                          |
| augustus_masked-6-processed-gene-17.10-mRNA-1  | NA | NA       |        | Os06g0133300 |                          |                                                                              |
| augustus_masked-6-processed-gene-17.16-mRNA-1  | NA | NA       |        | Os06g0132100 | OsR498G0611574800.01.T05 | Lung seven transmembrane receptor                                            |
| augustus_masked-6-processed-gene-17.17-mRNA-1  | NA | NA       |        | Os06g0132300 | OsR498G0611575200.01.T02 |                                                                              |
| augustus_masked-6-processed-gene-17.19-mRNA-1  | NA | NA       |        | 0            | OsR498G0611575400.01.T01 | Magnesium protoporphyrin IX methyltransferase chloroplastic                  |
| augustus_masked-6-processed-gene-17.7-mRNA-1   | NA | NA       |        | 0            | OsR498G0611576500.01.T01 | Plastid transcriptionally active 6                                           |
| augustus_masked-6-processed-gene-177.23-mRNA-1 | NA | Indica   |        | Os06g0503100 | OsR498G0612565500.01.T01 | ATPase, coupled to transmembrane movement of substances                      |
| augustus_masked-6-processed-gene-18.39-mRNA-1  | NA | NA       |        |              |                          |                                                                              |
| augustus_masked-6-processed-gene-18.54-mRNA-1  | NA | NA       |        | 0            | OsR498G0611583400.01.T01 |                                                                              |
| augustus_masked-6-processed-gene-182.21-mRNA-1 | NA | Indica   | NBS-TM | Os06g0503100 | OsR498G0612565500.01.T01 | ATPase, coupled to transmembrane movement of substances                      |
| augustus_masked-6-processed-gene-185.19-mRNA-1 | NA | NA       |        | Os06g0513754 | OsR498G0612611200.01.T01 | SNRNP27 domain-containing protein (Fragment)                                 |
| augustus_masked-6-processed-gene-185.4-mRNA-1  | NA | NA       |        | Os06g0513754 | OsR498G0612611200.01.T01 | SNRNP27 domain-containing protein (Fragment)                                 |
| augustus_masked-6-processed-gene-19.50-mRNA-1  | NA | NA       |        |              |                          | SNARE-interacting protein KEULE                                              |
| augustus_masked-6-processed-gene-19.71-mRNA-1  | NA | NA       |        | Os06g0136900 | OsR498G0611590800.01.T01 | AT-hook motif nuclear-localized protein 24                                   |
| augustus_masked-6-processed-gene-195.46-mRNA-1 | NA | NA       |        | Os08g0381000 | OsR498G0408344700.01.T01 | Cell wall protein-like                                                       |
| augustus_masked-6-processed-gene-20.66-mRNA-1  | NA | NA       |        | Os06g0138900 | OsR498G0611597900.01.T01 |                                                                              |
| augustus_masked-6-processed-gene-20.68-mRNA-1  | NA | Indica   |        | Os01g0881800 | OsR498G0611598700.01.T01 |                                                                              |
| augustus_masked-6-processed-gene-20.71-mRNA-1  | NA | NA       |        | Os06g0139800 | OsR498G0611599500.01.T01 | Acid phosphatase Class B                                                     |
| augustus_masked-6-processed-gene-20.86-mRNA-1  | NA | NA       |        | Os06g0138500 | OsR498G0611596000.01.T01 | Transcriptional factor B3 family protein / auxin-responsive factor AUX/IAA-r |
| augustus_masked-6-processed-gene-201.14-mRNA-1 | NA | NA       |        | Os06g0537600 | OsR498G0612697700.01.T01 | RING-H2 finger protein ATL1M                                                 |
| augustus_masked-6-processed-gene-201.24-mRNA-1 | NA | NA       |        | 0            | OsR498G0612698200.01.T01 |                                                                              |
| augustus_masked-6-processed-gene-201.39-mRNA-1 | NA | Japonica |        | Os06g0538400 | OsR498G0612699600.01.T01 |                                                                              |
| augustus_masked-6-processed-gene-202.15-mRNA-1 | NA | NA       |        | Os06g0542000 |                          |                                                                              |
| augustus_masked-6-processed-gene-202.9-mRNA-1  | NA | NA       |        | 0            | OsR498G0612705200.01.T02 | Non-specific lipid-transfer protein                                          |
| augustus_masked-6-processed-gene-205.23-mRNA-1 | NA | NA       |        | Os06g0547500 |                          |                                                                              |
| augustus_masked-6-processed-gene-205.27-mRNA-1 | NA | NA       |        | Os06g0547500 |                          |                                                                              |
| augustus_masked-6-processed-gene-206.16-mRNA-1 | NA | NA       |        | Os06g0548200 | OsR498G0612722200.01.T01 | Berberine bridge enzyme-like 22                                              |
| augustus_masked-6-processed-gene-207.36-mRNA-1 | NA | NA       |        | Os06g0550800 |                          | Translation initiation factor IF-2-like                                      |
| augustus_masked-6-processed-gene-21.33-mRNA-1  | NA | NA       | LRR-TM | Os06g0140000 | OsR498G0611600200.01.T01 | Serine/threonine-protein kinase bri1, putative                               |
| augustus_masked-6-processed-gene-21.35-mRNA-1  | NA | NA       | LRR-TM | Os06g0140200 | OsR498G0611600600.01.T01 | Leucine-rich repeat domain, L domain-like protein                            |

|                                                |    |          |               |              |                          |                                                              |
|------------------------------------------------|----|----------|---------------|--------------|--------------------------|--------------------------------------------------------------|
| augustus_masked-6-processed-gene-21.36-mRNA-1  | NA | NA       | LRR-TM        | Os06g0140300 | OsR498G0611601000.01.T01 | [Phosphatase 2A protein]-leucine-carboxy methyltransferase 1 |
| augustus_masked-6-processed-gene-21.42-mRNA-1  | NA | NA       |               | Os06g0140700 | OsR498G0611601900.01.T01 | Homeodomain-leucine zipper transcription factor TaHDZipl-1   |
| augustus_masked-6-processed-gene-211.24-mRNA-1 | NA | NA       |               | 0            | OsR498G0612760200.01.T01 | Protein DETOXIFICATION                                       |
| augustus_masked-6-processed-gene-226.0-mRNA-1  | NA | NA       | Kinase-LRR-TM |              |                          | U-box domain-containing protein 33-like isoform X1           |
| augustus_masked-6-processed-gene-226.9-mRNA-1  | NA | Indica   |               | Os06g0585200 | OsR498G0612842700.01.T01 | Tau-tubulin kinase                                           |
| augustus_masked-6-processed-gene-228.37-mRNA-1 | NA | NA       |               | Os09g0271000 | OsR498G0102577400.01.T01 | Epstein-Barr virus EBNA-1-like                               |
| augustus_masked-6-processed-gene-23.0-mRNA-1   | NA | NA       |               | Os06g0143700 | OsR498G0611611000.01.T02 | STAS domain-containing protein                               |
| augustus_masked-6-processed-gene-232.15-mRNA-1 | NA | NA       |               | Os06g0590700 | OsR498G0612863700.01.T01 | Glycosyltransferase                                          |
| augustus_masked-6-processed-gene-232.33-mRNA-1 | NA | Indica   |               | Os06g0590700 | OsR498G0612864400.01.T01 | Glycosyltransferase                                          |
| augustus_masked-6-processed-gene-234.23-mRNA-1 | NA | NA       |               | Os06g0594400 | OsR498G0612875900.01.T01 | Kelch repeat type 1                                          |
| augustus_masked-6-processed-gene-236.10-mRNA-1 | NA | NA       |               | Os06g0597500 | OsR498G0612883400.01.T01 | Pentatricopeptide repeat-containing protein mitochondrial    |
| augustus_masked-6-processed-gene-236.14-mRNA-1 | NA | NA       |               | Os06g0598800 | OsR498G0612885700.01.T02 | Very-long-chain 3-oxoacyl-CoA synthase                       |
| augustus_masked-6-processed-gene-24.16-mRNA-1  | NA | NA       |               | Os06g0147250 | OsR498G0611623700.01.T01 |                                                              |
| augustus_masked-6-processed-gene-24.17-mRNA-1  | NA | Indica   |               | Os06g0147300 | OsR498G0611624700.01.T01 |                                                              |
| augustus_masked-6-processed-gene-24.27-mRNA-1  | NA | Japonica |               | Os06g0147000 | OsR498G0611622000.01.T02 |                                                              |
| augustus_masked-6-processed-gene-24.30-mRNA-1  | NA | Japonica |               | Os06g0147600 | OsR498G0203221200.01.T05 |                                                              |
| augustus_masked-6-processed-gene-249.22-mRNA-1 | NA | NA       |               | 0            | OsR498G0203996000.01.T01 |                                                              |
| augustus_masked-6-processed-gene-249.45-mRNA-1 | NA | NA       |               | Os06g0621300 | OsR498G0613021000.01.T01 |                                                              |
| augustus_masked-6-processed-gene-25.24-mRNA-1  | NA | NA       |               | 0            | OsR498G0611626700.01.T01 |                                                              |
| augustus_masked-6-processed-gene-25.27-mRNA-1  | NA | NA       |               | Os06g0148600 | OsR498G0611628500.01.T01 | DUF295 domain-containing protein (Fragment)                  |
| augustus_masked-6-processed-gene-25.34-mRNA-1  | NA | NA       |               | 0            | OsR498G0204046800.01.T01 | Epstein-Barr virus EBNA-1-like                               |
| augustus_masked-6-processed-gene-25.39-mRNA-1  | NA | NA       |               | Os06g0148800 | OsR498G0611629300.01.T01 | DUF295 domain-containing protein (Fragment)                  |
| augustus_masked-6-processed-gene-25.41-mRNA-1  | NA | NA       |               | 0            | OsR498G0611629900.01.T01 | DUF295 domain-containing protein                             |
| augustus_masked-6-processed-gene-252.22-mRNA-1 | NA | NA       | Kinase-TM     | Os06g0625200 |                          | Proline-rich receptor-like protein kinase PERK14             |
| augustus_masked-6-processed-gene-252.24-mRNA-1 | NA | NA       | Kinase-TM     | Os06g0625300 | OsR498G0612980700.01.T01 | Proline-rich receptor-like protein kinase PERK9 (Fragment)   |
| augustus_masked-6-processed-gene-254.46-mRNA-1 | NA | NA       |               | Os12g0569000 |                          |                                                              |
| augustus_masked-6-processed-gene-254.48-mRNA-1 | NA | NA       |               | Os06g0659300 | OsR498G0613102400.01.T05 | HP domain-containing protein (Fragment)                      |
| augustus_masked-6-processed-gene-257.9-mRNA-1  | NA | NA       |               | Os05g0471800 |                          | Far-red impaired response protein-like                       |
| augustus_masked-6-processed-gene-26.1-mRNA-1   | NA | NA       |               | Os06g0289900 | OsR498G0612168000.01.T01 | Glycosyltransferase                                          |
| augustus_masked-6-processed-gene-26.11-mRNA-1  | NA | Japonica |               | Os06g0150550 | OsR498G0611636200.01.T01 | Anthranelate N-benzoyltransferase protein 1                  |
| augustus_masked-6-processed-gene-26.19-mRNA-1  | NA | NA       |               | Os06g0289900 | OsR498G0612168000.01.T01 | Glycosyltransferase                                          |
| augustus_masked-6-processed-gene-26.23-mRNA-1  | NA | NA       |               | Os06g0150200 | OsR498G0611633400.01.T01 | Putative disease resistance RPP13-like protein 1             |
| augustus_masked-6-processed-gene-262.33-mRNA-1 | NA | Indica   |               | Os02g0186800 | OsR498G0613042000.01.T01 | Premnaspirodiene oxygenase                                   |
| augustus_masked-6-processed-gene-262.7-mRNA-1  | NA | NA       |               | Os06g0640500 | OsR498G0613038900.01.T01 | Premnaspirodiene oxygenase                                   |
| augustus_masked-6-processed-gene-262.8-mRNA-1  | NA | NA       |               | Os06g0640500 | OsR498G0613038900.01.T01 | Premnaspirodiene oxygenase                                   |
| augustus_masked-6-processed-gene-263.24-mRNA-1 | NA | Indica   |               | Os02g0186800 | OsR498G0613042200.01.T01 | Premnaspirodiene oxygenase                                   |
| augustus_masked-6-processed-gene-263.25-mRNA-1 | NA | Japonica |               | Os06g0641900 | OsR498G0613042400.01.T01 | Premnaspirodiene oxygenase                                   |
| augustus_masked-6-processed-gene-263.34-mRNA-1 | NA | Indica   |               | Os11g0635500 | OsR498G0613043700.01.T01 | Premnaspirodiene oxygenase                                   |
| augustus_masked-6-processed-gene-263.35-mRNA-1 | NA | Indica   |               | Os11g0635500 | OsR498G0613043900.01.T01 | Premnaspirodiene oxygenase                                   |
| augustus_masked-6-processed-gene-264.11-mRNA-1 | NA | NA       | CC-LRR-NBS-TM | Os06g0644300 |                          | Formate dehydrogenase                                        |
| augustus_masked-6-processed-gene-264.12-mRNA-1 | NA | NA       |               |              |                          | S-acyltransferase                                            |
| augustus_masked-6-processed-gene-265.22-mRNA-1 | NA | NA       |               | Os06g0646100 |                          | DNA ligase (Fragment)                                        |
| augustus_masked-6-processed-gene-267.10-mRNA-1 | NA | NA       |               | Os06g0649700 | OsR498G0613069100.01.T01 | DOMON domain-containing protein                              |
| augustus_masked-6-processed-gene-268.43-mRNA-1 | NA | NA       |               | Os06g0650600 | OsR498G0613072900.01.T04 | Transmembrane 9 superfamily member                           |
| augustus_masked-6-processed-gene-268.47-mRNA-1 | NA | Japonica |               | Os06g0652100 | OsR498G0613076300.01.T01 | Vacuolar protein sorting-associated protein 26A-like         |
| augustus_masked-6-processed-gene-269.18-mRNA-1 | NA | NA       |               | Os06g0652400 | OsR498G0613077300.01.T01 | GDP-L-fucose synthase                                        |
| augustus_masked-6-processed-gene-269.31-mRNA-1 | NA | NA       |               | Os06g0653000 | OsR498G0613079500.01.T01 | Aldehyde oxygenase (deformylating)                           |
| augustus_masked-6-processed-gene-269.43-mRNA-1 | NA | NA       |               | Os06g0653200 | OsR498G0613080000.01.T01 | Transcription factor IBH1-like 1                             |
| augustus_masked-6-processed-gene-269.46-mRNA-1 | NA | NA       |               | Os06g0653800 | OsR498G0613081000.01.T01 | U5 small nuclear ribonucleoprotein 40 kDa protein isoform X1 |
| augustus_masked-6-processed-gene-27.51-mRNA-1  | NA | NA       |               | Os06g0151100 | OsR498G0611636200.01.T01 | Anthranelate N-benzoyltransferase protein 1                  |
| augustus_masked-6-processed-gene-27.75-mRNA-1  | NA | NA       |               | Os06g0152250 |                          | DNA mismatch repair protein                                  |
| augustus_masked-6-processed-gene-270.25-mRNA-1 | NA | NA       |               | Os06g0655200 | OsR498G0613087200.01.T01 | Expansin-like CBD domain-containing protein                  |
| augustus_masked-6-processed-gene-270.26-mRNA-1 | NA | NA       |               | Os06g0655500 | OsR498G0613088000.01.T01 | F-box protein AFR                                            |
| augustus_masked-6-processed-gene-271.28-mRNA-1 | NA | Indica   |               | Os06g0656300 | OsR498G0613091300.01.T04 |                                                              |
| augustus_masked-6-processed-gene-271.47-mRNA-1 | NA | Indica   |               | Os06g0656800 | OsR498G0613093400.01.T01 | Fasciclin-like arabinogalactan protein 8                     |
| augustus_masked-6-processed-gene-272.6-mRNA-1  | NA | NA       |               | Os06g0658200 |                          |                                                              |
| augustus_masked-6-processed-gene-273.23-mRNA-1 | NA | NA       |               | Os06g0659800 | OsR498G0613104200.01.T02 | tRNA(adenine(34)) deaminase                                  |
| augustus_masked-6-processed-gene-273.9-mRNA-1  | NA | NA       |               |              |                          | TRICHOME BIREFRINGENCE-LIKE 5                                |
| augustus_masked-6-processed-gene-274.44-mRNA-1 | NA | NA       |               | 0            | OsR498G0613106300.01.T01 |                                                              |
| augustus_masked-6-processed-gene-274.61-mRNA-1 | NA | NA       |               | Os06g0661600 | OsR498G0613111100.01.T02 | DPH-type MB domain-containing protein (Fragment)             |
| augustus_masked-6-processed-gene-275.22-mRNA-1 | NA | Indica   |               | Os06g0655200 | OsR498G0613113200.01.T01 | Expansin-like CBD domain-containing protein                  |

|                                                |    |          |               |              |                          |                                                                |
|------------------------------------------------|----|----------|---------------|--------------|--------------------------|----------------------------------------------------------------|
| augustus_masked-6-processed-gene-275.23-mRNA-1 | NA | NA       |               | Os06g0662300 | OsR498G0613113600.01.T01 | Expansin-like CBD domain-containing protein                    |
| augustus_masked-6-processed-gene-275.24-mRNA-1 | NA | NA       |               | Os06g0662500 | OsR498G0613114800.01.T01 | Expansin-like CBD domain-containing protein                    |
| augustus_masked-6-processed-gene-275.25-mRNA-1 | NA | NA       |               | Os06g0662600 | OsR498G0613115200.01.T01 | Expansin-like CBD domain-containing protein                    |
| augustus_masked-6-processed-gene-275.27-mRNA-1 | NA | NA       |               | Os06g0662800 |                          | Expansin-like CBD domain-containing protein                    |
| augustus_masked-6-processed-gene-275.45-mRNA-1 | NA | NA       |               | Os06g0662500 | OsR498G0613116400.01.T01 | Expansin-like CBD domain-containing protein                    |
| augustus_masked-6-processed-gene-275.51-mRNA-1 | NA | NA       |               | Os06g0663300 | OsR498G0613118400.01.T01 | Expansin-like CBD domain-containing protein                    |
| augustus_masked-6-processed-gene-277.25-mRNA-1 | NA | NA       |               | Os06g0666400 | OsR498G0613133500.01.T01 | VQ motif-containing protein 22                                 |
| augustus_masked-6-processed-gene-277.26-mRNA-1 | NA | NA       |               | Os06g0666500 | OsR498G0613134900.01.T01 | RING-H2 finger protein ATL5B                                   |
| augustus_masked-6-processed-gene-278.1-mRNA-1  | NA | NA       |               | Os06g0666800 | OsR498G0613136300.01.T01 | SLT domain-containing protein                                  |
| augustus_masked-6-processed-gene-278.12-mRNA-1 | NA | NA       |               | Os06g0667100 | OsR498G0613137700.01.T01 | Nuclear transcription factor Y subunit C                       |
| augustus_masked-6-processed-gene-278.17-mRNA-1 | NA | NA       |               | 0            | OsR498G0409198000.01.T01 | Glutaredoxin domain-containing protein                         |
| augustus_masked-6-processed-gene-278.2-mRNA-1  | NA | NA       | Kinase-LRR-TM | Os06g0667000 | OsR498G0613137300.01.T01 | Protein kinase domain-containing protein (Fragment)            |
| augustus_masked-6-processed-gene-278.36-mRNA-1 | NA | NA       |               | Os06g0668400 | OsR498G0613142000.01.T01 | BTB domain-containing protein (Fragment)                       |
| augustus_masked-6-processed-gene-279.6-mRNA-1  | NA | NA       |               | 0            | OsR498G0613144800.01.T01 | BTB/POZ and MATH domain-containing protein 2                   |
| augustus_masked-6-processed-gene-28.0-mRNA-1   | NA | NA       |               | Os06g0152500 | OsR498G0611639300.01.T01 | Pentatricopeptide repeat                                       |
| augustus_masked-6-processed-gene-28.13-mRNA-1  | NA | NA       |               | Os06g0154200 | OsR498G0611643900.01.T05 | F-box/LRR-repeat MAX2 like A                                   |
| augustus_masked-6-processed-gene-281.0-mRNA-1  | NA | NA       |               | Os06g0672400 | OsR498G0613158400.01.T03 | ALOG domain transcriptional regulator family protein 7-6B      |
| augustus_masked-6-processed-gene-282.29-mRNA-1 | NA | NA       |               | Os06g0675200 | OsR498G0613165600.01.T01 | Zinc finger CCH domain-containing protein 18-like              |
| augustus_masked-6-processed-gene-282.43-mRNA-1 | NA | NA       |               | Os06g0675700 | OsR498G0613167000.01.T02 | Putative alpha-glucosidase                                     |
| augustus_masked-6-processed-gene-283.10-mRNA-1 | NA | NA       |               | Os06g0677700 | OsR498G0613174100.01.T01 | 30-kDa cleavage and polyadenylation specificity factor 30      |
| augustus_masked-6-processed-gene-283.11-mRNA-1 | NA | NA       |               | Os06g0678100 |                          | Auxilin-like protein 1 isoform C                               |
| augustus_masked-6-processed-gene-283.16-mRNA-1 | NA | NA       |               | Os06g0677600 | OsR498G0613174000.01.T02 | Sm domain-containing protein (Fragment)                        |
| augustus_masked-6-processed-gene-284.20-mRNA-1 | NA | NA       |               | 0            | OsR498G0613182600.01.T01 | Peroxisomal membrane protein 11D-like isoform X1               |
| augustus_masked-6-processed-gene-286.37-mRNA-1 | NA | NA       |               | Os06g0114366 | OsR498G0613198100.01.T01 | Selenium-binding protein-like                                  |
| augustus_masked-6-processed-gene-286.52-mRNA-1 | NA | NA       |               | Os06g0683400 | OsR498G0613200700.01.T01 | EF-hand Ca2+-binding protein CCD1                              |
| augustus_masked-6-processed-gene-286.53-mRNA-1 | NA | NA       |               | Os06g0683900 | OsR498G0613202700.01.T01 |                                                                |
| augustus_masked-6-processed-gene-286.65-mRNA-1 | NA | NA       |               | Os06g0683100 | OsR498G0613200200.01.T03 | Dihydroflavonol-4-reductase                                    |
| augustus_masked-6-processed-gene-286.69-mRNA-1 | NA | NA       |               | Os06g0683950 | OsR498G0613203000.01.T01 | Armado/beta-catenin repeat protein-like                        |
| augustus_masked-6-processed-gene-287.33-mRNA-1 | NA | NA       |               | 0            | OsR498G0204046800.01.T01 | Circumsporozoite protein-like                                  |
| augustus_masked-6-processed-gene-287.43-mRNA-1 | NA | NA       |               | Os06g0685100 | OsR498G0613204700.01.T01 | COBRA-like protein 7                                           |
| augustus_masked-6-processed-gene-287.44-mRNA-1 | NA | NA       |               | 0            | OsR498G0613205300.01.T01 | Calcium lipid binding protein, putative                        |
| augustus_masked-6-processed-gene-287.45-mRNA-1 | NA | Indica   |               | Os02g0633200 | OsR498G0613206500.01.T01 |                                                                |
| augustus_masked-6-processed-gene-29.59-mRNA-1  | NA | NA       |               | Os06g0156700 | OsR498G0611653500.01.T01 | GDSL esterase/lipase                                           |
| augustus_masked-6-processed-gene-294.22-mRNA-1 | NA | NA       |               | Os06g0698600 | OsR498G0613245900.01.T01 | Exocyst subunit Exo70 family protein (Fragment)                |
| augustus_masked-6-processed-gene-294.33-mRNA-1 | NA | NA       |               | Os06g0698674 | OsR498G0613246200.01.T02 | W2 domain-containing protein (Fragment)                        |
| augustus_masked-6-processed-gene-294.4-mRNA-1  | NA | NA       |               | Os06g0698400 | OsR498G0613244900.01.T01 | RRM domain-containing protein (Fragment)                       |
| augustus_masked-6-processed-gene-295.37-mRNA-1 | NA | NA       | Kinase-TM     | Os06g0699400 | OsR498G0613249300.01.T03 | Mitogen-activated protein kinase                               |
| augustus_masked-6-processed-gene-295.52-mRNA-1 | NA | NA       |               | Os06g0700000 | OsR498G0613251700.01.T01 | Subtilisin-like serine protease                                |
| augustus_masked-6-processed-gene-295.60-mRNA-1 | NA | NA       |               | Os06g0700300 |                          |                                                                |
| augustus_masked-6-processed-gene-297.23-mRNA-1 | NA | Japonica |               | Os06g0702200 | OsR498G0613262200.01.T01 |                                                                |
| augustus_masked-6-processed-gene-297.9-mRNA-1  | NA | NA       |               | Os06g0702100 | OsR498G0613261700.01.T03 | Methyl-CpG-binding domain-containing protein 2                 |
| augustus_masked-6-processed-gene-299.12-mRNA-1 | NA | Indica   |               | Os06g0705000 | OsR498G0613272700.01.T01 | Glycosyltransferase family 64 protein C4                       |
| augustus_masked-6-processed-gene-299.24-mRNA-1 | NA | NA       | Kinase-TM     | Os02g0623600 | OsR498G0204344200.01.T02 | Wall-associated receptor kinase 3                              |
| augustus_masked-6-processed-gene-299.26-mRNA-1 | NA | Indica   |               | Os02g0191200 | OsR498G0613274200.01.T01 | Pentatricopeptide repeat                                       |
| augustus_masked-6-processed-gene-300.17-mRNA-1 | NA | NA       |               | 0            | OsR498G0613278700.01.T01 |                                                                |
| augustus_masked-6-processed-gene-300.24-mRNA-1 | NA | Indica   | Kinase        | Os02g0623600 | OsR498G0613277600.01.T01 | Putative tyrosine-protein kinase, insulin-like receptor        |
| augustus_masked-6-processed-gene-300.26-mRNA-1 | NA | NA       |               | Os06g0706700 | OsR498G0613278000.01.T01 | Erythrocyte membrane protein 1-like                            |
| augustus_masked-6-processed-gene-300.30-mRNA-1 | NA | NA       |               | Os06g0707300 | OsR498G0613279000.01.T01 | DUF295 domain-containing protein (Fragment)                    |
| augustus_masked-6-processed-gene-301.30-mRNA-1 | NA | NA       |               | Os06g0710700 | OsR498G0613286600.01.T01 | Benzyl alcohol O-benzoyltransferase                            |
| augustus_masked-6-processed-gene-302.14-mRNA-1 | NA | NA       |               | Os06g0712200 | OsR498G0613291300.01.T01 | Nudix hydrolase domain-containing protein                      |
| augustus_masked-6-processed-gene-306.13-mRNA-1 | NA | NA       |               | Os07g0561900 | OsR498G0102180600.01.T01 | Thiamine diphosphokinase                                       |
| augustus_masked-6-processed-gene-308.25-mRNA-1 | NA | NA       |               |              |                          | Non-specific serine/threonine protein kinase                   |
| augustus_masked-6-processed-gene-31.37-mRNA-1  | NA | NA       |               | Os06g0158800 | OsR498G0611659900.01.T01 | Lactoylglutathione lyase-like                                  |
| augustus_masked-6-processed-gene-31.63-mRNA-1  | NA | NA       |               | 0            | OsR498G0815592700.01.T01 | BTB domain-containing protein (Fragment)                       |
| augustus_masked-6-processed-gene-312.17-mRNA-1 | NA | NA       |               | Os09g0448100 | OsR498G1221005700.01.T01 | F-box protein interaction domain containing protein, expressed |
| augustus_masked-6-processed-gene-312.31-mRNA-1 | NA | Indica   | Kinase        | Os02g0623600 | OsR498G0613277600.01.T01 | Putative tyrosine-protein kinase, insulin-like receptor        |
| augustus_masked-6-processed-gene-312.33-mRNA-1 | NA | NA       |               | Os06g0706700 | OsR498G0613278000.01.T01 | Erythrocyte membrane protein 1-like                            |
| augustus_masked-6-processed-gene-32.46-mRNA-1  | NA | NA       |               | 0            | OsR498G0611666300.01.T01 | FLZ-type domain-containing protein                             |
| augustus_masked-6-processed-gene-32.56-mRNA-1  | NA | NA       |               | 0            | OsR498G0611667200.01.T01 |                                                                |
| augustus_masked-6-processed-gene-32.72-mRNA-1  | NA | Indica   |               | Os06g0161900 | OsR498G0611670700.01.T01 | DUF569 domain-containing protein                               |
| augustus_masked-6-processed-gene-33.52-mRNA-1  | NA | NA       |               | 0            | OsR498G0611677100.01.T01 |                                                                |

|                                               |    |          |               |              |                          |                                                                            |
|-----------------------------------------------|----|----------|---------------|--------------|--------------------------|----------------------------------------------------------------------------|
| augustus_masked-6-processed-gene-34.43-mRNA-1 | NA | NA       | Kinase-TM     | Os06g0164900 |                          | Non-specific serine/threonine protein kinase (Fragment)                    |
| augustus_masked-6-processed-gene-34.59-mRNA-1 | NA | Indica   |               | Os05g0393900 | OsR498G0611683900.01.T01 |                                                                            |
| augustus_masked-6-processed-gene-35.26-mRNA-1 | NA | NA       | Kinase        | 0            | OsR498G0611689200.01.T01 | C2H2-type domain-containing protein                                        |
| augustus_masked-6-processed-gene-36.39-mRNA-1 | NA | NA       |               |              |                          | DUF569 domain-containing protein                                           |
| augustus_masked-6-processed-gene-37.49-mRNA-1 | NA | NA       |               | Os06g0171500 |                          | Zn2-c6 fungal-type dna-binding domain                                      |
| augustus_masked-6-processed-gene-40.2-mRNA-1  | NA | NA       |               | Os06g0179500 | OsR498G0611718100.01.T01 |                                                                            |
| augustus_masked-6-processed-gene-42.42-mRNA-1 | NA | NA       |               | 0            | OsR498G0611733200.01.T03 | Tartrate-resistant acid phosphatase type 5-like                            |
| augustus_masked-6-processed-gene-42.44-mRNA-1 | NA | NA       |               | Os06g0183900 | OsR498G0611733800.01.T03 | Replication termination factor 2                                           |
| augustus_masked-6-processed-gene-44.56-mRNA-1 | NA | NA       |               | 0            | OsR498G0611745700.01.T01 | Putative RING-H2 finger protein ATL49                                      |
| augustus_masked-6-processed-gene-45.29-mRNA-1 | NA | NA       |               | Os06g0187500 | OsR498G0611746400.01.T01 | Glycosyltransferase                                                        |
| augustus_masked-6-processed-gene-46.26-mRNA-1 | NA | NA       |               | 0            | OsR498G0611749300.01.T01 | PB1 domain-containing protein                                              |
| augustus_masked-6-processed-gene-46.57-mRNA-1 | NA | NA       |               | 0            | OsR498G0611633900.01.T01 |                                                                            |
| augustus_masked-6-processed-gene-49.13-mRNA-1 | NA | NA       |               | 0            | OsR498G0511427100.01.T01 | Epstein-Barr virus EBNA-1-like                                             |
| augustus_masked-6-processed-gene-50.19-mRNA-1 | NA | NA       |               | 0            | OsR498G0611786900.01.T01 | AP2/ERF domain-containing protein (Fragment)                               |
| augustus_masked-6-processed-gene-50.20-mRNA-1 | NA | NA       |               | 0            | OsR498G0611787300.01.T01 | AP2 domain transcription factor-like                                       |
| augustus_masked-6-processed-gene-51.1-mRNA-1  | NA | NA       | Kinase-LRR-TM | Os06g0198900 | OsR498G0611789100.01.T01 | Pollen receptor-like protein kinase 3                                      |
| augustus_masked-6-processed-gene-51.2-mRNA-1  | NA | NA       |               | Os06g0199000 | OsR498G0611840000.01.T01 |                                                                            |
| augustus_masked-6-processed-gene-52.0-mRNA-1  | NA | NA       |               | Os06g0201000 | OsR498G0611796500.01.T01 |                                                                            |
| augustus_masked-6-processed-gene-52.21-mRNA-1 | NA | NA       |               | Os06g0202400 | OsR498G0611801700.01.T01 |                                                                            |
| augustus_masked-6-processed-gene-52.22-mRNA-1 | NA | Indica   |               | Os06g0202700 | OsR498G0611801500.01.T03 |                                                                            |
| augustus_masked-6-processed-gene-52.33-mRNA-1 | NA | NA       |               |              |                          |                                                                            |
| augustus_masked-6-processed-gene-55.11-mRNA-1 | NA | Indica   |               | Os06g0207500 | OsR498G0611824500.01.T04 | Protein trichome birefringence                                             |
| augustus_masked-6-processed-gene-56.39-mRNA-1 | NA | NA       |               | Os06g0209100 | OsR498G0611834100.01.T01 | Peptidase A1 domain-containing protein (Fragment)                          |
| augustus_masked-6-processed-gene-57.50-mRNA-1 | NA | NA       |               | Os06g0211100 | OsR498G0611840000.01.T01 | Transposon protein, putative, CACTA, En/Spm sub-class, expressed           |
| augustus_masked-6-processed-gene-58.29-mRNA-1 | NA | Japonica |               | Os06g0212600 | OsR498G0204823700.01.T01 | Fucosyltransferase                                                         |
| augustus_masked-6-processed-gene-60.53-mRNA-1 | NA | NA       |               | Os06g0216400 | OsR498G0611857800.01.T01 | Transcription factor EMB1444                                               |
| augustus_masked-6-processed-gene-63.34-mRNA-1 | NA | Indica   |               | Os06g0220300 | OsR498G0611872700.01.T01 |                                                                            |
| augustus_masked-6-processed-gene-63.35-mRNA-1 | NA | NA       |               | Os06g0220300 | OsR498G0611872900.01.T01 | Phosphate-induced protein                                                  |
| augustus_masked-6-processed-gene-65.17-mRNA-1 | NA | Indica   |               | Os02g0752800 | OsR498G0611880000.01.T01 | Ethylene-responsive transcription factor RAP2-4                            |
| augustus_masked-6-processed-gene-66.35-mRNA-1 | NA | NA       |               | Os06g0224100 | OsR498G0611907700.01.T02 | Membrane-anchored ubiquitin-fold protein 6                                 |
| augustus_masked-6-processed-gene-66.37-mRNA-1 | NA | NA       |               | Os06g0225000 | OsR498G0611910300.01.T01 | GTP-binding protein SAR1A                                                  |
| augustus_masked-6-processed-gene-66.38-mRNA-1 | NA | NA       |               | Os06g0225200 | OsR498G0611911100.01.T01 | Transcription termination factor MTERF8, chloroplastic                     |
| augustus_masked-6-processed-gene-66.47-mRNA-1 | NA | Indica   |               | Os06g0224600 | OsR498G0611909400.01.T01 | Transcription termination factor MTERF2, chloroplastic                     |
| augustus_masked-6-processed-gene-66.48-mRNA-1 | NA | NA       |               | Os06g0224650 | OsR498G0611909600.01.T01 | Mitochondrial transcription termination factor-like                        |
| augustus_masked-6-processed-gene-66.49-mRNA-1 | NA | NA       |               | Os06g0224700 | OsR498G0611909800.01.T04 | Mitochondrial transcription termination factor-like                        |
| augustus_masked-6-processed-gene-66.50-mRNA-1 | NA | NA       |               | Os06g0224900 | OsR498G0611910200.01.T03 | Mitochondrial transcription termination factor-like                        |
| augustus_masked-6-processed-gene-66.51-mRNA-1 | NA | NA       |               | Os06g0225100 | OsR498G0611910600.01.T01 | Transcription termination factor MTERF8, chloroplastic                     |
| augustus_masked-6-processed-gene-67.33-mRNA-1 | NA | Japonica |               | Os06g0226100 | OsR498G0611914100.01.T01 | Glutaredoxin domain-containing protein (Fragment)                          |
| augustus_masked-6-processed-gene-67.35-mRNA-1 | NA | NA       |               | Os06g0226700 | OsR498G0611917700.01.T01 | Transcription factor, TCP                                                  |
| augustus_masked-6-processed-gene-68.11-mRNA-1 | NA | NA       |               | 0            | OsR498G0611922300.01.T01 | Energy transducer TonB                                                     |
| augustus_masked-6-processed-gene-70.3-mRNA-1  | NA | NA       |               | Os06g0231400 |                          | Selenium-binding protein-like                                              |
| augustus_masked-6-processed-gene-71.33-mRNA-1 | NA | NA       |               | Os06g0233200 | OsR498G0611947800.01.T01 | RING-H2 finger protein ATL46                                               |
| augustus_masked-6-processed-gene-72.10-mRNA-1 | NA | NA       |               | 0            | OsR498G0611954600.01.T01 |                                                                            |
| augustus_masked-6-processed-gene-72.28-mRNA-1 | NA | NA       |               | 0            | OsR498G0611957800.01.T01 | Pre-mRNA-splicing factor SYF1                                              |
| augustus_masked-6-processed-gene-77.12-mRNA-1 | NA | NA       |               |              |                          |                                                                            |
| augustus_masked-6-processed-gene-78.10-mRNA-1 | NA | NA       |               | Os06g0246600 | OsR498G0611991000.01.T01 | Glutamate receptor                                                         |
| augustus_masked-6-processed-gene-78.15-mRNA-1 | NA | Indica   |               | Os02g0739400 | OsR498G0611993700.01.T02 | Hexosyltransferase                                                         |
| augustus_masked-6-processed-gene-78.17-mRNA-1 | NA | NA       |               | Os06g0247800 | OsR498G0611996700.01.T05 | Dynamin GTPase                                                             |
| augustus_masked-6-processed-gene-79.23-mRNA-1 | NA | Japonica |               | Os06g0249500 | OsR498G0612005800.01.T04 | Pentatricopeptide repeat-containing protein, mitochondrial                 |
| augustus_masked-6-processed-gene-8.13-mRNA-1  | NA | NA       |               | Os06g0114333 | OsR498G0611506700.01.T01 | F-box domain-containing protein                                            |
| augustus_masked-6-processed-gene-8.14-mRNA-1  | NA | NA       |               | Os06g0114366 |                          | Pentatricopeptide repeat-containing protein, chloroplastic                 |
| augustus_masked-6-processed-gene-8.18-mRNA-1  | NA | NA       |               | Os06g0115000 |                          |                                                                            |
| augustus_masked-6-processed-gene-8.34-mRNA-1  | NA | NA       |               | Os06g0115200 | OsR498G0611509600.01.T02 | Iron only hydrogenase large subunit, C-terminal domain-containing protein, |
| augustus_masked-6-processed-gene-81.17-mRNA-1 | NA | NA       |               | 0            | OsR498G0101903500.01.T01 | Potassium channel KAT3                                                     |
| augustus_masked-6-processed-gene-84.17-mRNA-1 | NA | NA       |               | 0            | OsR498G0612035900.01.T01 | Myb-like transcription factor-like                                         |
| augustus_masked-6-processed-gene-9.50-mRNA-1  | NA | NA       |               | 0            | OsR498G0611511200.01.T01 | Histone deacetylase HDT2-like                                              |
| augustus_masked-6-processed-gene-9.58-mRNA-1  | NA | Indica   |               | Os06g0119100 | OsR498G0611515500.01.T01 | DUF4220 domain-containing protein (Fragment)                               |
| augustus_masked-6-processed-gene-9.71-mRNA-1  | NA | NA       |               | Os06g0116900 | OsR498G0611514600.01.T01 |                                                                            |
| augustus_masked-6-processed-gene-91.11-mRNA-1 | NA | NA       |               | 0            | OsR498G1221332900.01.T01 | Retrotransposon protein, putative, unclassified                            |
| augustus_masked-6-processed-gene-92.44-mRNA-1 | NA | Japonica |               | Os06g0272800 | OsR498G0612082400.01.T01 | Leaf senescence protein-like                                               |
| augustus_masked-6-processed-gene-93.4-mRNA-1  | NA | NA       |               |              |                          | Importin N-terminal domain-containing protein                              |



|                                                |    |          |               |              |                          |                                                                                 |
|------------------------------------------------|----|----------|---------------|--------------|--------------------------|---------------------------------------------------------------------------------|
| augustus_masked-6-processed-gene-94.23-mRNA-1  | NA | NA       |               | Os06g0275500 | OsR498G0612092700.01.T01 | Histone-lysine N-methyltransferase EZ1                                          |
| augustus_masked-6-processed-gene-95.7-mRNA-1   | NA | NA       |               | Os04g0286500 | OsR498G0204941300.01.T01 | Transposon protein, putative, Pong sub-class, expressed                         |
| augustus_masked-6-processed-gene-98.11-mRNA-1  | NA | NA       |               | Os06g0282000 | OsR498G0612136200.01.T01 | Putative flavonoid glucosyl-transferase                                         |
| augustus_masked-6-processed-gene-98.31-mRNA-1  | NA | NA       |               | Os06g0283400 | OsR498G0612143000.01.T01 | Phosphatidylinositol 4-kinase type 2-beta                                       |
| augustus_masked-7-processed-gene-131.18-mRNA-1 | NA | NA       |               |              |                          | Regulatory-associated protein of mTOR                                           |
| augustus_masked-7-processed-gene-35.41-mRNA-1  | NA | NA       |               | Os09g0271000 | OsR498G0102577400.01.T01 | Epstein-Barr virus EBNA-1-like                                                  |
| augustus_masked-7-processed-gene-74.35-mRNA-1  | NA | NA       |               | Os07g0240600 | OsR498G0713860700.01.T01 | DIMBOA UDP-glucosyltransferase BX9                                              |
| augustus_masked-8-processed-gene-100.8-mRNA-1  | NA | NA       |               | Os08g0260400 | OsR498G0815571100.01.T01 | Transcription factor IBH1-like                                                  |
| augustus_masked-8-processed-gene-101.5-mRNA-1  | NA | NA       | CC-NBS-TM     | Os08g0261000 | OsR498G0815572500.01.T03 | NBS-type RGA protein (Fragment)                                                 |
| augustus_masked-8-processed-gene-104.22-mRNA-1 | NA | NA       |               | Os08g0267800 | OsR498G0815589400.01.T02 | F-box domain-containing protein                                                 |
| augustus_masked-8-processed-gene-105.3-mRNA-1  | NA | Indica   |               | Os06g0159750 | OsR498G0815592700.01.T01 | BTB domain-containing protein (Fragment)                                        |
| augustus_masked-8-processed-gene-106.28-mRNA-1 | NA | NA       |               |              |                          |                                                                                 |
| augustus_masked-8-processed-gene-109.9-mRNA-1  | NA | NA       | Kinase-TM     | Os08g0275200 | OsR498G0815613300.01.T01 | Receptor-like protein kinase                                                    |
| augustus_masked-8-processed-gene-115.9-mRNA-1  | NA | Japonica |               | Os08g0282100 | OsR498G0815638900.01.T01 |                                                                                 |
| augustus_masked-8-processed-gene-119.26-mRNA-1 | NA | NA       |               | Os06g0479233 |                          |                                                                                 |
| augustus_masked-8-processed-gene-121.16-mRNA-1 | NA | NA       |               | Os08g0290500 | OsR498G0815665700.01.T01 |                                                                                 |
| augustus_masked-8-processed-gene-121.18-mRNA-1 | NA | Indica   |               | Os06g0543400 | OsR498G0815666900.01.T01 | NAF domain-containing protein (Fragment)                                        |
| augustus_masked-8-processed-gene-122.18-mRNA-1 | NA | NA       |               | Os08g0292600 | OsR498G0815673500.01.T02 | Peptidyl-prolyl cis-trans isomerase                                             |
| augustus_masked-8-processed-gene-127.10-mRNA-1 | NA | NA       |               | 0            | OsR498G0102482400.01.T01 |                                                                                 |
| augustus_masked-8-processed-gene-127.12-mRNA-1 | NA | NA       |               | 0            | OsR498G0204041100.01.T01 |                                                                                 |
| augustus_masked-8-processed-gene-141.13-mRNA-1 | NA | NA       |               | Os08g0318400 |                          |                                                                                 |
| augustus_masked-8-processed-gene-149.9-mRNA-1  | NA | NA       |               | Os08g0327100 | OsR498G0815788300.01.T01 | Hexosyltransferase                                                              |
| augustus_masked-8-processed-gene-151.11-mRNA-1 | NA | NA       |               | Os08g0330900 |                          | F-box domain-containing protein                                                 |
| augustus_masked-8-processed-gene-159.25-mRNA-1 | NA | NA       |               | 0            | OsR498G0815842300.01.T01 |                                                                                 |
| augustus_masked-8-processed-gene-164.10-mRNA-1 | NA | NA       |               | Os08g0349100 | OsR498G0815862900.01.T01 | Dirigent protein (Fragment)                                                     |
| augustus_masked-8-processed-gene-165.12-mRNA-1 | NA | NA       |               | 0            | OsR498G0815867900.01.T01 | Nucleoprotein TPR                                                               |
| augustus_masked-8-processed-gene-172.21-mRNA-1 | NA | NA       |               | 0            | OsR498G0611677100.01.T01 |                                                                                 |
| augustus_masked-8-processed-gene-182.7-mRNA-1  | NA | NA       |               |              |                          |                                                                                 |
| augustus_masked-8-processed-gene-183.6-mRNA-1  | NA | NA       |               | Os02g0540000 | OsR498G1019218100.01.T01 | Putative RING-H2 finger protein ATL53                                           |
| augustus_masked-8-processed-gene-187.10-mRNA-1 | NA | NA       |               |              |                          | Retrotransposon protein, putative, unclassified                                 |
| augustus_masked-8-processed-gene-190.21-mRNA-1 | NA | NA       |               | Os08g0375400 | OsR498G0815950900.01.T01 | Dirigent protein (Fragment)                                                     |
| augustus_masked-8-processed-gene-191.13-mRNA-1 | NA | NA       |               | Os08g0375700 | OsR498G0815952700.01.T01 | O-fucosyltransferase family protein                                             |
| augustus_masked-8-processed-gene-191.14-mRNA-1 | NA | NA       |               | Os08g0375800 | OsR498G0815953100.01.T01 | Pentatricopeptide repeat                                                        |
| augustus_masked-8-processed-gene-192.7-mRNA-1  | NA | Indica   |               | Os08g0377300 | OsR498G0815959900.01.T01 | Response regulatory domain-containing protein                                   |
| augustus_masked-8-processed-gene-194.24-mRNA-1 | NA | NA       |               | 0            | OsR498G0815971100.01.T02 | F-box protein interaction domain containing protein, expressed                  |
| augustus_masked-8-processed-gene-195.24-mRNA-1 | NA | NA       |               | 0            | OsR498G0815973500.01.T03 | Nuclear transcription factor Y subunit B                                        |
| augustus_masked-8-processed-gene-196.0-mRNA-1  | NA | NA       |               |              |                          |                                                                                 |
| augustus_masked-8-processed-gene-198.16-mRNA-1 | NA | NA       | NBS-TM        | Os08g0388300 | OsR498G0815986100.01.T03 | NB-ARC domain containing protein, expressed                                     |
| augustus_masked-8-processed-gene-199.25-mRNA-1 | NA | NA       |               | Os08g0390000 | OsR498G0815993500.01.T04 | Proton pump-interactor 1                                                        |
| augustus_masked-8-processed-gene-20.1-mRNA-1   | NA | NA       |               | 0            | OsR498G0815124900.01.T01 | rRNA N-glycosidase                                                              |
| augustus_masked-8-processed-gene-204.31-mRNA-1 | NA | NA       |               | Os08g0400200 | OsR498G0816031100.01.T01 | Histone-lysine N-methyltransferase H3 lysine-9 specific SUVH5                   |
| augustus_masked-8-processed-gene-222.2-mRNA-1  | NA | NA       |               | 0            | OsR498G0816141700.01.T01 | Retarded palea 1 protein (Fragment)                                             |
| augustus_masked-8-processed-gene-223.0-mRNA-1  | NA | NA       |               | Os08g0433000 | OsR498G0816147700.01.T01 | Arginine decarboxylase                                                          |
| augustus_masked-8-processed-gene-223.1-mRNA-1  | NA | Indica   |               | Os08g0433000 | OsR498G0816147700.01.T01 | Arginine decarboxylase                                                          |
| augustus_masked-8-processed-gene-230.13-mRNA-1 | NA | NA       |               |              |                          |                                                                                 |
| augustus_masked-8-processed-gene-230.8-mRNA-1  | NA | NA       |               | Os08g0445000 | OsR498G0816195500.01.T01 | Putative RING-H2 finger protein ATL49                                           |
| augustus_masked-8-processed-gene-248.16-mRNA-1 | NA | NA       |               | 0            | OsR498G0204046800.01.T01 | Epstein-Barr virus EBNA-1-like                                                  |
| augustus_masked-8-processed-gene-250.9-mRNA-1  | NA | NA       |               | Os08g0481100 | OsR498G0816322700.01.T01 | Myosin-2 heavy chain-like                                                       |
| augustus_masked-8-processed-gene-251.25-mRNA-1 | NA | Indica   |               | Os08g0481500 | OsR498G0816325700.01.T05 |                                                                                 |
| augustus_masked-8-processed-gene-251.39-mRNA-1 | NA | NA       |               | 0            | OsR498G0816326100.01.T01 |                                                                                 |
| augustus_masked-8-processed-gene-251.42-mRNA-1 | NA | NA       |               | Os08g0482300 | OsR498G0816327700.01.T01 | Arabinogalactan protein 1                                                       |
| augustus_masked-8-processed-gene-252.40-mRNA-1 | NA | NA       |               | Os08g0484200 | OsR498G0816335900.01.T01 | E3 ubiquitin-protein ligase ATL6                                                |
| augustus_masked-8-processed-gene-252.44-mRNA-1 | NA | NA       |               | Os08g0484700 | OsR498G0816337700.01.T01 | MADF domain-containing protein (Fragment)                                       |
| augustus_masked-8-processed-gene-252.46-mRNA-1 | NA | NA       |               | 0            | OsR498G0816338100.01.T01 |                                                                                 |
| augustus_masked-8-processed-gene-253.50-mRNA-1 | NA | NA       |               | 0            | OsR498G0816342500.01.T01 |                                                                                 |
| augustus_masked-8-processed-gene-253.55-mRNA-1 | NA | NA       |               | Os08g0486700 | OsR498G0816347100.01.T02 |                                                                                 |
| augustus_masked-8-processed-gene-254.25-mRNA-1 | NA | NA       |               | 0            | OsR498G0816353100.01.T01 | UDP-glycosyltransferase 89B2                                                    |
| augustus_masked-8-processed-gene-255.13-mRNA-1 | NA | NA       |               | Os08g0490100 | OsR498G0816360300.01.T01 | Dof zinc finger protein PBF                                                     |
| augustus_masked-8-processed-gene-255.16-mRNA-1 | NA | NA       |               | Os08g0490700 | OsR498G0816362100.01.T02 |                                                                                 |
| augustus_masked-8-processed-gene-256.1-mRNA-1  | NA | NA       |               | Os08g0491400 | OsR498G0816363900.01.T01 | Interferon-related developmental regulator family protein / IFRD protein family |
| augustus_masked-8-processed-gene-257.1-mRNA-1  | NA | Indica   | Kinase-LRR-TM | Os08g0493800 | OsR498G0816372100.01.T01 | LRR receptor-like serine/threonine-protein kinase                               |

|                                                |    |          |               |              |                          |                                                                          |
|------------------------------------------------|----|----------|---------------|--------------|--------------------------|--------------------------------------------------------------------------|
| augustus_masked-8-processed-gene-257.19-mRNA-1 | NA | Japonica |               | Os08g0495200 | OsR498G0816378100.01.T02 |                                                                          |
| augustus_masked-8-processed-gene-258.24-mRNA-1 | NA | NA       |               | Os08g0495800 | OsR498G0816380100.01.T01 | Galactinol--sucrose galactosyltransferase                                |
| augustus_masked-8-processed-gene-258.25-mRNA-1 | NA | NA       |               | Os08g0496000 | OsR498G0816380700.01.T02 | Cytochrome c oxidase assembly protein COX15                              |
| augustus_masked-8-processed-gene-258.27-mRNA-1 | NA | Indica   |               | Os09g0480400 | OsR498G0816383100.01.T01 | Hexosyltransferase                                                       |
| augustus_masked-8-processed-gene-258.36-mRNA-1 | NA | Japonica |               | Os08g0496400 | OsR498G0816384200.01.T01 | RNA polymerase II elongation factor ELL3 isoform 1                       |
| augustus_masked-8-processed-gene-259.16-mRNA-1 | NA | NA       |               | Os08g0499400 | OsR498G0816396900.01.T01 |                                                                          |
| augustus_masked-8-processed-gene-259.19-mRNA-1 | NA | NA       |               | 0            | OsR498G0816397700.01.T01 |                                                                          |
| augustus_masked-8-processed-gene-260.36-mRNA-1 | NA | NA       |               | Os08g0499800 | OsR498G0816397900.01.T02 | Pentatricopeptide repeat-containing protein mitochondrial                |
| augustus_masked-8-processed-gene-260.48-mRNA-1 | NA | NA       |               | Os08g0500500 | OsR498G0816401500.01.T01 | DNA-binding protein-like                                                 |
| augustus_masked-8-processed-gene-260.51-mRNA-1 | NA | NA       |               | Os08g0500800 | OsR498G0816402300.01.T01 | Ubiquitin and WLM domain-containing metalloprotease                      |
| augustus_masked-8-processed-gene-261.38-mRNA-1 | NA | Indica   |               | Os08g0503000 | OsR498G0816413100.01.T01 | Glycerophosphoryl diester phosphodiesterase family domain containing pro |
| augustus_masked-8-processed-gene-270.46-mRNA-1 | NA | NA       | Kinase-LRR-TM | Os08g0518400 |                          | Serine/threonine-protein kinase                                          |
| augustus_masked-8-processed-gene-270.47-mRNA-1 | NA | NA       |               | Os08g0518900 | OsR498G0816472500.01.T01 | Xylanase inhibitor protein 1                                             |
| augustus_masked-8-processed-gene-271.11-mRNA-1 | NA | Japonica |               | Os08g0519800 | OsR498G0816477900.01.T01 | Pumilio homolog 5                                                        |
| augustus_masked-8-processed-gene-273.10-mRNA-1 | NA | NA       |               | 0            | OsR498G0816485800.01.T01 | Zinc finger POZ domain protein-like                                      |
| augustus_masked-8-processed-gene-279.9-mRNA-1  | NA | NA       |               |              |                          | Membrane fusion protein Use1                                             |
| augustus_masked-8-processed-gene-29.46-mRNA-1  | NA | NA       |               | 0            | OsR498G0815186900.01.T01 | DUF4220 domain-containing protein (Fragment)                             |
| augustus_masked-8-processed-gene-39.39-mRNA-1  | NA | NA       |               | Os08g0162700 | OsR498G0815253700.01.T01 | PCI domain-containing protein                                            |
| augustus_masked-8-processed-gene-51.10-mRNA-1  | NA | NA       |               | 0            | OsR498G0815329100.01.T01 |                                                                          |
| augustus_masked-8-processed-gene-52.26-mRNA-1  | NA | NA       |               | 0            | OsR498G0815333900.01.T01 | Fatty acid desaturase A                                                  |
| augustus_masked-8-processed-gene-53.1-mRNA-1   | NA | NA       |               | Os08g0189300 | OsR498G0815338100.01.T01 | Germin-like protein 8-4                                                  |
| augustus_masked-8-processed-gene-53.22-mRNA-1  | NA | NA       |               | Os08g0191000 | OsR498G0815344900.01.T01 | Auxin efflux carrier                                                     |
| augustus_masked-8-processed-gene-54.38-mRNA-1  | NA | NA       |               | 0            | OsR498G0815345700.01.T02 |                                                                          |
| augustus_masked-8-processed-gene-54.50-mRNA-1  | NA | NA       |               | Os08g0191900 | OsR498G0815347700.01.T01 | Tetratricopeptide repeat-like superfamily protein (Fragment)             |
| augustus_masked-8-processed-gene-57.11-mRNA-1  | NA | Indica   |               | Os08g0197300 | OsR498G0815366500.01.T01 | F-box domain-containing protein                                          |
| augustus_masked-8-processed-gene-62.5-mRNA-1   | NA | NA       |               | Os08g0203800 | OsR498G0815388100.01.T01 | AMP-binding domain-containing protein (Fragment)                         |
| augustus_masked-8-processed-gene-73.23-mRNA-1  | NA | Japonica |               | Os08g0239300 | OsR498G0815510700.01.T03 | DLH domain-containing protein                                            |
| augustus_masked-8-processed-gene-73.8-mRNA-1   | NA | NA       |               | 0            | OsR498G0815170600.01.T01 | DUF834 domain-containing protein                                         |
| augustus_masked-8-processed-gene-73.9-mRNA-1   | NA | NA       |               | 0            | OsR498G0815170600.01.T01 | DUF834 domain-containing protein                                         |
| augustus_masked-8-processed-gene-8.43-mRNA-1   | NA | Japonica |               | Os08g0114000 | OsR498G0204365600.01.T01 | T-complex protein 1 subunit eta                                          |
| augustus_masked-8-processed-gene-84.13-mRNA-1  | NA | NA       |               | Os08g0232700 | OsR498G0815493900.01.T01 | Exocyst subunit Exo70 family protein (Fragment)                          |
| augustus_masked-8-processed-gene-87.36-mRNA-1  | NA | NA       |               | Os11g0275000 |                          | BHLH domain-containing protein (Fragment)                                |
| augustus_masked-8-processed-gene-87.38-mRNA-1  | NA | NA       |               | Os11g0275200 | OsR498G1119808500.01.T01 | Endo-1,31,4-beta-D-glucanase, putative, expressed                        |
| augustus_masked-8-processed-gene-96.14-mRNA-1  | NA | Indica   |               | Os06g0192100 | OsR498G0815553900.01.T01 | UDPG-flavonoid 3-O-glucosyl transferase (Fragment)                       |
| augustus_masked-9-processed-gene-12.8-mRNA-1   | NA | NA       |               | 0            | OsR498G1221265400.01.T01 |                                                                          |
| augustus_masked-9-processed-gene-14.28-mRNA-1  | NA | NA       |               | 0            | OsR498G0509838600.01.T01 | HGWP repeat containing protein-like                                      |
| augustus_masked-9-processed-gene-151.10-mRNA-1 | NA | NA       | Kinase-TM     | Os09g0418500 | OsR498G0917465900.01.T01 | Non-specific serine/threonine protein kinase                             |
| augustus_masked-9-processed-gene-154.8-mRNA-1  | NA | NA       |               | Os09g0423300 | OsR498G0917480900.01.T01 | Pentatricopeptide repeat-containing protein chloroplastic                |
| augustus_masked-9-processed-gene-180.27-mRNA-1 | NA | NA       | Kinase-TM     |              |                          | Wall-associated receptor kinase                                          |
| augustus_masked-9-processed-gene-183.26-mRNA-1 | NA | NA       |               | Os09g0476300 |                          |                                                                          |
| augustus_masked-9-processed-gene-183.29-mRNA-1 | NA | NA       |               | Os09g0477100 | OsR498G0917681700.01.T01 | ABC-type dipeptide transport system, periplasmic component               |
| augustus_masked-9-processed-gene-208.23-mRNA-1 | NA | NA       |               | Os09g0528100 | OsR498G0917834700.01.T01 | 30S ribosomal protein S31 mitochondrial                                  |
| augustus_masked-9-processed-gene-210.47-mRNA-1 | NA | NA       |               | Os09g0532800 | OsR498G0917851900.01.T01 | Pentatricopeptide repeat-containing protein mitochondrial                |
| augustus_masked-9-processed-gene-210.48-mRNA-1 | NA | NA       |               |              |                          | AB hydrolase-1 domain-containing protein (Fragment)                      |
| augustus_masked-9-processed-gene-210.49-mRNA-1 | NA | NA       |               | Os09g0532800 | OsR498G0917852300.01.T08 | Pentatricopeptide repeat-containing protein mitochondrial                |
| augustus_masked-9-processed-gene-212.23-mRNA-1 | NA | NA       |               | Os09g0536300 | OsR498G0917864300.01.T01 | Thaumatococcus-like protein 1                                            |
| augustus_masked-9-processed-gene-212.24-mRNA-1 | NA | NA       |               | Os09g0536400 | OsR498G0917866300.01.T01 | Thaumatococcus-like protein 1b                                           |
| augustus_masked-9-processed-gene-212.26-mRNA-1 | NA | NA       |               | Os09g0537200 | OsR498G0917868900.01.T01 |                                                                          |
| augustus_masked-9-processed-gene-212.30-mRNA-1 | NA | Japonica |               | Os09g0537533 | OsR498G0917870300.01.T01 |                                                                          |
| augustus_masked-9-processed-gene-215.26-mRNA-1 | NA | NA       |               | Os09g0542900 | OsR498G0917890300.01.T01 | Syringolide-induced protein 14-1-1                                       |
| augustus_masked-9-processed-gene-217.11-mRNA-1 | NA | NA       |               | Os09g0545360 | OsR498G0917901900.01.T06 |                                                                          |
| augustus_masked-9-processed-gene-217.12-mRNA-1 | NA | NA       |               | Os09g0545700 | OsR498G0917903100.01.T01 | Auxin-responsive protein SAUR36-like                                     |
| augustus_masked-9-processed-gene-217.30-mRNA-1 | NA | NA       |               | Os09g0546000 | OsR498G0917903500.01.T04 | Auxin-responsive protein SAUR36-like                                     |
| augustus_masked-9-processed-gene-217.31-mRNA-1 | NA | NA       |               | Os09g0546100 | OsR498G0917903700.01.T01 | Auxin-responsive protein SAUR36                                          |
| augustus_masked-9-processed-gene-217.34-mRNA-1 | NA | Japonica |               | Os09g0546500 | OsR498G0917903700.01.T01 | Auxin-responsive protein SAUR36                                          |
| augustus_masked-9-processed-gene-217.35-mRNA-1 | NA | Indica   |               | Os09g0545400 | OsR498G0917905100.01.T01 |                                                                          |
| augustus_masked-9-processed-gene-217.36-mRNA-1 | NA | Indica   |               | Os09g0545700 | OsR498G0917905300.01.T01 | Pectinesterase                                                           |
| augustus_masked-9-processed-gene-217.38-mRNA-1 | NA | Japonica |               | Os09g0547100 | OsR498G0917903100.01.T01 | Auxin-responsive protein SAUR36                                          |
| augustus_masked-9-processed-gene-230.16-mRNA-1 | NA | NA       |               | Os09g0536300 | OsR498G0917864300.01.T01 | Thaumatococcus-like protein 1                                            |
| augustus_masked-9-processed-gene-24.18-mRNA-1  | NA | NA       |               | 0            | OsR498G1221332900.01.T01 | Retrotransposon protein, putative, unclassified                          |
| augustus_masked-9-processed-gene-25.14-mRNA-1  | NA | NA       |               | 0            | OsR498G0916743300.01.T02 |                                                                          |

|                                               |    |          |               |              |                          |                                                                            |
|-----------------------------------------------|----|----------|---------------|--------------|--------------------------|----------------------------------------------------------------------------|
| augustus_masked-9-processed-gene-26.20-mRNA-1 | NA | NA       |               | Os07g0562300 | OsR498G0714577600.01.T01 | Carbohydrate transporter/ sugar porter                                     |
| augustus_masked-9-processed-gene-26.21-mRNA-1 | NA | NA       |               | Os07g0562400 | OsR498G0714577900.01.T01 | MFS domain-containing protein (Fragment)                                   |
| augustus_masked-9-processed-gene-50.22-mRNA-1 | NA | NA       |               | Os09g0260000 | OsR498G0916854500.01.T01 | HORMA domain-containing protein                                            |
| augustus_masked-9-processed-gene-53.22-mRNA-1 | NA | Indica   | Kinase-LRR-TM | Os05g0525550 | OsR498G0916869900.01.T01 | Putative serine/threonine-specific protein kinase                          |
| augustus_masked-9-processed-gene-53.6-mRNA-1  | NA | NA       |               | 0            | OsR498G0204152000.01.T01 |                                                                            |
| augustus_masked-9-processed-gene-55.15-mRNA-1 | NA | NA       |               | Os09g0267600 | OsR498G0916877500.01.T05 | Vacuolar protein sorting-associated protein 1                              |
| augustus_masked-9-processed-gene-55.25-mRNA-1 | NA | Indica   | Kinase-TM     | Os07g0283125 | OsR498G0916878900.01.T01 | Lectin-domain containing receptor kinase A4.2                              |
| augustus_masked-9-processed-gene-55.39-mRNA-1 | NA | Indica   | Kinase-TM     | Os07g0130600 | OsR498G0916878800.01.T01 | L-type lectin-domain containing receptor kinase IV.2                       |
| augustus_masked-9-processed-gene-69.8-mRNA-1  | NA | NA       |               | 0            | OsR498G0916950600.01.T01 | MBD domain-containing protein                                              |
| augustus_masked-9-processed-gene-79.10-mRNA-1 | NA | NA       |               | 0            | OsR498G1120619900.01.T01 | UvrD-like helicase C-terminal domain/Helix-hairpin-helix containing domain |
| augustus_masked-9-processed-gene-82.11-mRNA-1 | NA | NA       |               | Os09g0304500 | OsR498G0917038900.01.T01 |                                                                            |
| augustus_masked-9-processed-gene-83.12-mRNA-1 | NA | NA       |               | Os09g0305300 | OsR498G0917041300.01.T01 |                                                                            |
| augustus_masked-9-processed-gene-83.15-mRNA-1 | NA | NA       |               | 0            | OsR498G0511427100.01.T01 | Epstein-Barr virus EBNA-1-like                                             |
| augustus_masked-9-processed-gene-86.16-mRNA-1 | NA | NA       | CC-NBS-TM     | Os09g0308500 |                          | Putative nucleotide-binding leucine-rich-repeat protein 1                  |
| augustus_masked-9-processed-gene-87.7-mRNA-1  | NA | NA       |               | Os09g0309500 | OsR498G0917061900.01.T01 |                                                                            |
| augustus_masked-9-processed-gene-87.8-mRNA-1  | NA | Japonica |               | Os09g0309600 | OsR498G0917062300.01.T01 |                                                                            |
| augustus_masked-9-processed-gene-90.3-mRNA-1  | NA | NA       |               | Os06g0489700 | OsR498G0100876900.01.T01 | Thiamine diphosphokinase                                                   |
| augustus_masked-9-processed-gene-99.8-mRNA-1  | NA | NA       |               | Os07g0298700 | OsR498G0713923900.01.T01 | Cell wall protein-like                                                     |
| maker-1-augustus-gene-0.26-mRNA-1             | NA | Indica   |               | Os01g0137100 | OsR498G0100127300.01.T01 | Putative receptor serine/threonine kinase PR5K                             |
| maker-1-augustus-gene-0.28-mRNA-1             | NA | NA       | Kinase-TM     | Os01g0136800 | OsR498G0100126800.01.T01 | WAK2-OsWAK receptor-like cytoplasmic kinase (OsWAK-RLCK)                   |
| maker-1-augustus-gene-0.30-mRNA-1             | NA | NA       |               | Os03g0738900 | OsR498G0307014300.01.T01 | Phototropic-responsive NPH3 family protein isoform 2                       |
| maker-1-augustus-gene-1.0-mRNA-1              | NA | NA       |               | Os02g0578100 | OsR498G0204172500.01.T01 | Glycosyltransferase                                                        |
| maker-1-augustus-gene-1.38-mRNA-1             | NA | NA       |               | Os01g0174300 | OsR498G0100248000.01.T01 | NADH-cytochrome b5 reductase                                               |
| maker-1-augustus-gene-1.42-mRNA-1             | NA | NA       |               | Os01g0174500 | OsR498G0100248600.01.T03 | Procollagen-proline 4-dioxygenase                                          |
| maker-1-augustus-gene-1.45-mRNA-1             | NA | NA       |               | Os02g0578100 | OsR498G0204172500.01.T01 | Glycosyltransferase                                                        |
| maker-1-augustus-gene-105.3-mRNA-1            | NA | NA       |               | Os03g0114600 | OsR498G0612855600.01.T01 | Transposable element protein, putative, MuDR                               |
| maker-1-augustus-gene-108.7-mRNA-1            | NA | NA       |               | Os07g0157000 | OsR498G0100723800.01.T01 | Peroxidase                                                                 |
| maker-1-augustus-gene-108.9-mRNA-1            | NA | NA       |               | Os01g0293600 |                          | Tam3-transposase (Ac family)                                               |
| maker-1-augustus-gene-109.0-mRNA-1            | NA | NA       |               | Os11g0307600 | OsR498G1119899800.01.T01 | Protein kinase domain-containing protein                                   |
| maker-1-augustus-gene-109.12-mRNA-1           | NA | NA       |               | Os04g0354200 |                          | Transposon protein, putative, unclassified                                 |
| maker-1-augustus-gene-11.46-mRNA-1            | NA | NA       |               | 0            | OsR498G0100065900.01.T01 | Fruit protein like                                                         |
| maker-1-augustus-gene-11.49-mRNA-1            | NA | Indica   |               | Os01g0121100 | OsR498G0100066900.01.T01 | Protein-lysine N-methyltransferase                                         |
| maker-1-augustus-gene-11.56-mRNA-1            | NA | NA       |               | 0            | OsR498G0100064800.01.T01 | Leucine--tRNA ligase                                                       |
| maker-1-augustus-gene-11.64-mRNA-1            | NA | NA       |               | Os01g0120400 | OsR498G0100065000.01.T01 | Alanyl-tRNA editing protein AlaX-L                                         |
| maker-1-augustus-gene-11.70-mRNA-1            | NA | NA       |               | Os01g0120500 | OsR498G0100065400.01.T01 | PAP fibrillin domain containing protein,expressed                          |
| maker-1-augustus-gene-11.73-mRNA-1            | NA | NA       |               | Os01g0120800 | OsR498G0100066400.01.T02 | Eukaryotic translation initiation factor 3 subunit A                       |
| maker-1-augustus-gene-11.79-mRNA-1            | NA | NA       |               | Os01g0121200 | OsR498G0100067400.01.T03 | RING/FYVE/PHD zinc finger superfamily protein                              |
| maker-1-augustus-gene-11.82-mRNA-1            | NA | NA       |               | Os01g0121300 |                          | Putative ion transport domain-containing protein                           |
| maker-1-augustus-gene-115.0-mRNA-1            | NA | Indica   |               | Os01g0305900 | OsR498G0100758100.01.T01 | Myb-related protein P                                                      |
| maker-1-augustus-gene-115.7-mRNA-1            | NA | NA       |               | Os01g0306100 | OsR498G0100759200.01.T01 | Eukaryotic translation initiation factor 4B                                |
| maker-1-augustus-gene-12.36-mRNA-1            | NA | NA       |               | Os01g0121800 | OsR498G0100071500.01.T03 | Xylosyltransferase 1                                                       |
| maker-1-augustus-gene-12.39-mRNA-1            | NA | Japonica |               | Os01g0121900 | OsR498G0100071900.01.T01 | RING-type E3 ubiquitin transferase                                         |
| maker-1-augustus-gene-12.46-mRNA-1            | NA | Indica   |               | Os01g0122000 | OsR498G0100072700.01.T01 | RING-type E3 ubiquitin transferase                                         |
| maker-1-augustus-gene-12.48-mRNA-1            | NA | NA       |               | Os01g0122200 | OsR498G0100073300.01.T01 | SIAH-type domain-containing protein                                        |
| maker-1-augustus-gene-12.50-mRNA-1            | NA | NA       |               | Os01g0121700 | OsR498G0100071400.01.T01 | ABC transporter G family member                                            |
| maker-1-augustus-gene-124.14-mRNA-1           | NA | NA       |               | Os01g0321700 | OsR498G0100814400.01.T01 | Protein transport protein SEC23                                            |
| maker-1-augustus-gene-13.48-mRNA-1            | NA | Japonica |               | Os01g0123500 | OsR498G0100078900.01.T02 | RING-type E3 ubiquitin transferase                                         |
| maker-1-augustus-gene-13.54-mRNA-1            | NA | Indica   |               | Os01g0119500 | OsR498G0100078800.01.T01 |                                                                            |
| maker-1-augustus-gene-13.56-mRNA-1            | NA | Indica   |               | Os01g0123500 | OsR498G0100080000.01.T01 | RING-type E3 ubiquitin transferase                                         |
| maker-1-augustus-gene-13.58-mRNA-1            | NA | Indica   | Kinase-LRR-TM | Os05g0524500 | OsR498G0100082200.01.T01 | Putative serine/threonine-specific receptor protein kinase                 |
| maker-1-augustus-gene-13.61-mRNA-1            | NA | NA       |               | Os07g0485900 |                          | Transposon mutator sub-class                                               |
| maker-1-augustus-gene-131.40-mRNA-1           | NA | NA       |               |              |                          | RRM domain-containing protein                                              |
| maker-1-augustus-gene-133.37-mRNA-1           | NA | NA       |               | 0            | OsR498G0510503700.01.T01 | Cell wall protein-like                                                     |
| maker-1-augustus-gene-133.44-mRNA-1           | NA | NA       |               | 0            | OsR498G0101916300.01.T01 |                                                                            |
| maker-1-augustus-gene-133.46-mRNA-1           | NA | NA       |               | Os01g0336300 |                          | DUF4220 domain-containing protein (Fragment)                               |
| maker-1-augustus-gene-136.0-mRNA-1            | NA | NA       |               |              |                          | Transposable element protein, putative, MuDR                               |
| maker-1-augustus-gene-138.0-mRNA-1            | NA | NA       |               | Os08g0381000 | OsR498G0713579700.01.T01 | Cell wall protein-like                                                     |
| maker-1-augustus-gene-139.1-mRNA-1            | NA | NA       |               | Os01g0346501 |                          | Transposon protein, putative, CACTA, En/Spm sub-class                      |
| maker-1-augustus-gene-15.35-mRNA-1            | NA | NA       |               | Os01g0127900 | OsR498G0100091900.01.T02 | Mannose-6-phosphate isomerase                                              |
| maker-1-augustus-gene-15.38-mRNA-1            | NA | NA       |               | Os01g0128200 | OsR498G0100094500.01.T01 | Aspergillus nuclease 5(1)                                                  |
| maker-1-augustus-gene-15.44-mRNA-1            | NA | Indica   |               | Os01g0128800 | OsR498G0100095900.01.T02 | extended synaptotagmin-1 isoform X3                                        |

|                                     |    |          |           |              |                           |                                                                               |
|-------------------------------------|----|----------|-----------|--------------|---------------------------|-------------------------------------------------------------------------------|
| maker-1-augustus-gene-15.51-mRNA-1  | NA | Indica   |           | Os01g0129000 | OsR498G0100098300.01.T01  | Zinc finger protein JAGGED                                                    |
| maker-1-augustus-gene-15.54-mRNA-1  | NA | NA       |           | Os01g0128000 | OsR498G0100093200.01.T01  | Transcription factor MYB21                                                    |
| maker-1-augustus-gene-15.56-mRNA-1  | NA | NA       |           | Os01g0128100 | OsR498G0100094400.01.T01  | Aspergillus nuclease S(1)                                                     |
| maker-1-augustus-gene-15.64-mRNA-1  | NA | NA       |           | Os01g0128400 | OsR498G0100095000.01.T01  | Transmembrane protein 214-B                                                   |
| maker-1-augustus-gene-16.28-mRNA-1  | NA | NA       |           | Os01g0129600 | OsR498G0100101300.01.T01  | LOB domain-containing protein 42                                              |
| maker-1-augustus-gene-16.34-mRNA-1  | NA | NA       |           | Os01g0129500 | OsR498G0100099600.01.T01  | Checkpoint serine/threonine-protein kinase BUB1, putative isoform 1           |
| maker-1-augustus-gene-161.39-mRNA-1 | NA | NA       |           |              |                           | DDE Tnp4 domain-containing protein                                            |
| maker-1-augustus-gene-174.0-mRNA-1  | NA | NA       |           | Os01g0514300 | OsR498G0101112100.01.T01  | LisH dimerization motif                                                       |
| maker-1-augustus-gene-174.5-mRNA-1  | NA | NA       |           | Os01g0514000 | OsR498G0101112000.01.T02  | TRASH domain-containing protein (Fragment)                                    |
| maker-1-augustus-gene-176.8-mRNA-1  | NA | NA       |           | Os01g0495200 | OsR498G01018408000.01.T01 | Trichome birefringence-like                                                   |
| maker-1-augustus-gene-177.34-mRNA-1 | NA | NA       |           | Os01g0444100 |                           |                                                                               |
| maker-1-augustus-gene-177.40-mRNA-1 | NA | NA       |           | 0            | OsR498G1119744400.01.T02  |                                                                               |
| maker-1-augustus-gene-188.29-mRNA-1 | NA | NA       |           | Os01g0513900 | OsR498G010111700.01.T03   | Kinesin-like protein KIN-7A                                                   |
| maker-1-augustus-gene-188.55-mRNA-1 | NA | NA       |           | Os01g0514000 | OsR498G0101112000.01.T02  | TRASH domain-containing protein (Fragment)                                    |
| maker-1-augustus-gene-189.0-mRNA-1  | NA | NA       |           | Os01g0514300 | OsR498G0101112100.01.T01  | LisH dimerization motif                                                       |
| maker-1-augustus-gene-19.21-mRNA-1  | NA | NA       | Kinase-TM | Os01g0136800 | OsR498G0100126800.01.T01  | WAK2-OsWAK receptor-like cytoplasmic kinase (OsWAK-RLCK)                      |
| maker-1-augustus-gene-19.3-mRNA-1   | NA | Indica   |           | Os01g0137100 | OsR498G0100127300.01.T01  | Putative receptor serine/threonine kinase PR5K                                |
| maker-1-augustus-gene-190.7-mRNA-1  | NA | NA       |           |              |                           | Plant PDR ABC transporter associated                                          |
| maker-1-augustus-gene-191.5-mRNA-1  | NA | NA       |           | Os01g0518500 | OsR498G0101123600.01.T01  | Alpha-galactosidase                                                           |
| maker-1-augustus-gene-20.9-mRNA-1   | NA | NA       | Kinase-TM |              |                           | Protein kinase domain-containing protein (Fragment)                           |
| maker-1-augustus-gene-201.0-mRNA-1  | NA | NA       |           | Os01g0534700 | OsR498G0101178700.01.T01  | ABC transporter B family member 9                                             |
| maker-1-augustus-gene-201.2-mRNA-1  | NA | NA       |           | Os01g0534800 | OsR498G0101179100.01.T01  | Ubiquitin recognition factor in ER-associated degradation protein 1           |
| maker-1-augustus-gene-201.4-mRNA-1  | NA | NA       |           | Os01g0534900 | OsR498G0101179400.01.T03  | Calcium permeable stress-gated cation channel 1                               |
| maker-1-augustus-gene-201.9-mRNA-1  | NA | NA       | Kinase-TM | 0            | OsR498G0101184200.01.T02  | Cysteine-rich receptor-like protein kinase 10                                 |
| maker-1-augustus-gene-202.34-mRNA-1 | NA | NA       |           |              |                           | tRNA (Guanine-N-7) methyltransferase                                          |
| maker-1-augustus-gene-202.40-mRNA-1 | NA | NA       | Kinase-TM |              |                           | Non-specific serine/threonine protein kinase                                  |
| maker-1-augustus-gene-202.45-mRNA-1 | NA | NA       |           | Os01g0536400 | OsR498G0101187200.01.T01  | Fe2OG dioxygenase domain-containing protein (Fragment)                        |
| maker-1-augustus-gene-202.47-mRNA-1 | NA | Indica   |           | Os01g0537250 | OsR498G0101190400.01.T01  | NB-ARC domain-containing protein                                              |
| maker-1-augustus-gene-204.24-mRNA-1 | NA | Japonica |           | Os01g0538200 | OsR498G0101198500.01.T01  |                                                                               |
| maker-1-augustus-gene-205.0-mRNA-1  | NA | NA       |           | 0            | OsR498G0511276500.01.T01  |                                                                               |
| maker-1-augustus-gene-205.2-mRNA-1  | NA | NA       |           | 0            | OsR498G0101213400.01.T03  |                                                                               |
| maker-1-augustus-gene-205.5-mRNA-1  | NA | NA       |           | Os05g0513800 | OsR498G0511174900.01.T02  | Rac-like GTP-binding protein 2                                                |
| maker-1-augustus-gene-206.0-mRNA-1  | NA | NA       |           | 0            | OsR498G0101216300.01.T03  | Protein enhanced disease resistance 2                                         |
| maker-1-augustus-gene-206.11-mRNA-1 | NA | NA       |           | Os01g0541600 | OsR498G0101219000.01.T01  | BAH domain-containing protein                                                 |
| maker-1-augustus-gene-206.3-mRNA-1  | NA | NA       |           | Os01g0541000 | OsR498G0101216300.01.T08  | TF-B3 domain-containing protein                                               |
| maker-1-augustus-gene-206.6-mRNA-1  | NA | NA       |           | Os01g0541800 | OsR498G0101225100.01.T01  | Bidirectional sugar transporter SWEET                                         |
| maker-1-augustus-gene-206.8-mRNA-1  | NA | NA       |           | Os11g0471200 | OsR498G0101218400.01.T01  | Profilin                                                                      |
| maker-1-augustus-gene-207.34-mRNA-1 | NA | NA       | Kinase    | Os01g0541900 | OsR498G0101225400.01.T04  | Kinase family protein / protein phosphatase 2C ( PP2C) family protein isoform |
| maker-1-augustus-gene-208.0-mRNA-1  | NA | NA       |           | Os01g0543100 | OsR498G0101234300.01.T01  | Peroxidase                                                                    |
| maker-1-augustus-gene-208.3-mRNA-1  | NA | NA       |           | 0            | OsR498G0101240900.01.T01  | Sesquiterpene oxidase                                                         |
| maker-1-augustus-gene-208.5-mRNA-1  | NA | NA       |           | 0            | OsR498G0101243900.01.T02  | Indole-2-monooxygenase                                                        |
| maker-1-augustus-gene-208.7-mRNA-1  | NA | NA       |           | 0            | OsR498G0100876000.01.T01  | Transposon protein, putative, Mutator sub-class, expressed                    |
| maker-1-augustus-gene-209.23-mRNA-1 | NA | NA       |           | 0            | OsR498G0101246700.01.T01  | DNA helicase                                                                  |
| maker-1-augustus-gene-209.28-mRNA-1 | NA | NA       |           | 0            | OsR498G0101250000.01.T01  | transcription factor MYB61                                                    |
| maker-1-augustus-gene-209.31-mRNA-1 | NA | NA       |           | Os01g0545500 | OsR498G0101251800.01.T02  |                                                                               |
| maker-1-augustus-gene-210.0-mRNA-1  | NA | NA       | Kinase-TM | 0            | OsR498G0101254500.01.T02  | Proline-rich receptor-like protein kinase PERK8                               |
| maker-1-augustus-gene-210.10-mRNA-1 | NA | Indica   |           | Os01g0546100 | OsR498G0101254800.01.T01  |                                                                               |
| maker-1-augustus-gene-210.14-mRNA-1 | NA | NA       |           | Os01g0546400 | OsR498G0101257000.01.T02  |                                                                               |
| maker-1-augustus-gene-210.16-mRNA-1 | NA | Indica   |           | Os01g0546400 | OsR498G0101257000.01.T05  |                                                                               |
| maker-1-augustus-gene-210.19-mRNA-1 | NA | NA       |           | Os01g0547133 | OsR498G0101259400.01.T01  | Carboxyl-terminal proteinase                                                  |
| maker-1-augustus-gene-211.35-mRNA-1 | NA | NA       |           | Os05g0394100 | OsR498G0713729200.01.T01  | NAM-associated domain-containing protein                                      |
| maker-1-augustus-gene-211.38-mRNA-1 | NA | NA       |           |              |                           | Putative Bromodomain adjacent to zinc finger domain protein 1A                |
| maker-1-augustus-gene-211.41-mRNA-1 | NA | NA       |           | 0            | OsR498G0101263400.01.T01  | High affinity nitrate transporter                                             |
| maker-1-augustus-gene-211.43-mRNA-1 | NA | NA       | Kinase-TM | 0            | OsR498G0101271400.01.T01  | Cysteine-rich receptor-like protein kinase                                    |
| maker-1-augustus-gene-212.0-mRNA-1  | NA | NA       |           | 0            | OsR498G0101272700.01.T01  | Polygalacturonase                                                             |
| maker-1-augustus-gene-212.10-mRNA-1 | NA | NA       |           | 0            | OsR498G0101273200.01.T07  | Protein MICRORCHIDIA 6                                                        |
| maker-1-augustus-gene-212.2-mRNA-1  | NA | NA       |           | Os01g0549400 | OsR498G0101275700.01.T01  | ATP-dependent RNA helicase-like protein DB10                                  |
| maker-1-augustus-gene-212.20-mRNA-1 | NA | NA       |           | Os01g0549300 | OsR498G0101275600.01.T01  | NAM-associated domain-containing protein (Fragment)                           |
| maker-1-augustus-gene-212.23-mRNA-1 | NA | NA       |           | Os01g0549500 | OsR498G0101276600.01.T03  | PX domain-containing protein/DUF4206 domain-containing protein                |
| maker-1-augustus-gene-212.7-mRNA-1  | NA | NA       |           | Os01g0549700 | OsR498G0101276700.01.T01  | Spliceosome RNA helicase BAT1 isoform 1                                       |
| maker-1-augustus-gene-213.43-mRNA-1 | NA | Japonica |           | Os01g0550600 | OsR498G0101282300.01.T01  | Ribonuclease P protein subunit P38-related                                    |

|                                     |    |          |        |              |                           |                                                                            |
|-------------------------------------|----|----------|--------|--------------|---------------------------|----------------------------------------------------------------------------|
| maker-1-augustus-gene-213.45-mRNA-1 | NA | NA       |        | Os01g0550800 | OsR498G0101284300.01.T01  | Carboxyl-terminal peptidase-like                                           |
| maker-1-augustus-gene-213.46-mRNA-1 | NA | Japonica |        | Os01g0550900 | OsR498G0102779300.01.T01  | NEP-interacting protein 1                                                  |
| maker-1-augustus-gene-213.61-mRNA-1 | NA | NA       |        | Os01g0551000 | OsR498G0101286900.01.T01  | Translation initiation factor IF-2-like                                    |
| maker-1-augustus-gene-213.63-mRNA-1 | NA | NA       |        | Os01g0550100 | OsR498G0101279600.01.T01  | Ubiquitin carboxyl-terminal hydrolase                                      |
| maker-1-augustus-gene-213.68-mRNA-1 | NA | Indica   |        | Os01g0550300 | OsR498G0101280600.01.T01  | DCD (Development and Cell Death) domain protein                            |
| maker-1-augustus-gene-213.72-mRNA-1 | NA | NA       |        | Os01g0551100 | OsR498G0101287200.01.T02  | RNase III domain-containing protein                                        |
| maker-1-augustus-gene-214.23-mRNA-1 | NA | NA       |        | Os01g0551400 |                           | Envelope glycoprotein                                                      |
| maker-1-augustus-gene-214.25-mRNA-1 | NA | NA       |        | 0            | OsR498G0101290900.01.T03  |                                                                            |
| maker-1-augustus-gene-214.30-mRNA-1 | NA | NA       |        | Os01g0552300 | OsR498G0101292100.01.T05  | Protein-serine/threonine phosphatase                                       |
| maker-1-augustus-gene-214.32-mRNA-1 | NA | NA       |        | 0            | OsR498G0101291200.01.T03  | Transducin family protein / WD-40 repeat family protein                    |
| maker-1-augustus-gene-214.38-mRNA-1 | NA | NA       |        | 0            | OsR498G01018210400.01.T03 |                                                                            |
| maker-1-augustus-gene-215.4-mRNA-1  | NA | NA       |        | Os05g0471800 | OsR498G0101301300.01.T01  | Far-red impaired response protein-like                                     |
| maker-1-augustus-gene-215.5-mRNA-1  | NA | NA       |        | Os01g0553301 | OsR498G0101296800.01.T02  |                                                                            |
| maker-1-augustus-gene-215.8-mRNA-1  | NA | NA       |        | Os02g0517900 | OsR498G0203939000.01.T03  |                                                                            |
| maker-1-augustus-gene-216.2-mRNA-1  | NA | NA       |        | Os01g0555200 | OsR498G0101311800.01.T01  | Aspartate racemase                                                         |
| maker-1-augustus-gene-216.4-mRNA-1  | NA | NA       |        | Os01g0555300 | OsR498G0101312000.01.T01  | Tail fiber                                                                 |
| maker-1-augustus-gene-216.6-mRNA-1  | NA | NA       |        | Os01g0555600 | OsR498G0101312200.01.T01  | Dynein light chain like                                                    |
| maker-1-augustus-gene-216.8-mRNA-1  | NA | NA       |        | 0            | OsR498G0101312600.01.T01  | Peptide deformylase                                                        |
| maker-1-augustus-gene-217.0-mRNA-1  | NA | NA       |        | 0            | OsR498G0101324500.01.T01  | F-box domain-containing protein                                            |
| maker-1-augustus-gene-217.2-mRNA-1  | NA | NA       |        | Os01g0556800 |                           | Agenet-like domain-containing protein                                      |
| maker-1-augustus-gene-217.5-mRNA-1  | NA | NA       |        | Os01g0557100 | OsR498G0101322400.01.T01  | AB hydrolase-1 domain-containing protein (Fragment)                        |
| maker-1-augustus-gene-217.7-mRNA-1  | NA | NA       |        |              |                           | Methylesterase 3                                                           |
| maker-1-augustus-gene-218.42-mRNA-1 | NA | NA       |        | 0            | OsR498G0101333900.01.T01  | Ubiquinol-cytochrome-c reductase complex core protein I, mitochondrial     |
| maker-1-augustus-gene-218.51-mRNA-1 | NA | NA       |        | Os01g0559000 | OsR498G0101334100.01.T01  | PITH domain-containing protein 1                                           |
| maker-1-augustus-gene-218.56-mRNA-1 | NA | NA       |        | Os01g0557500 | OsR498G0101324800.01.T02  | Vacuolar cation/proton exchanger                                           |
| maker-1-augustus-gene-218.60-mRNA-1 | NA | NA       |        | Os01g0558300 | OsR498G0101331200.01.T01  | RWD domain-containing protein 1                                            |
| maker-1-augustus-gene-218.63-mRNA-1 | NA | NA       |        | Os01g0558600 | OsR498G0101333000.01.T01  | Ras-related protein RIC1                                                   |
| maker-1-augustus-gene-218.67-mRNA-1 | NA | NA       |        | Os01g0558800 | OsR498G0101333800.01.T02  | Oxidoreductase/ transition metal ion binding protein                       |
| maker-1-augustus-gene-219.0-mRNA-1  | NA | NA       |        | Os03g0198400 | OsR498G0101334700.01.T01  | Seryl-tRNA synthetase                                                      |
| maker-1-augustus-gene-22.25-mRNA-1  | NA | NA       | LRR-TM | Os01g0140400 | OsR498G0100141500.01.T06  | Di-glucose binding protein with Leucine-rich repeat domain                 |
| maker-1-augustus-gene-22.32-mRNA-1  | NA | Indica   |        | Os01g0141100 | OsR498G0100149000.01.T02  | Protein SUPPRESSOR OF K(+) TRANSPORT GROWTH DEFECT 1                       |
| maker-1-augustus-gene-22.37-mRNA-1  | NA | Indica   |        | Os01g0141100 | OsR498G0100149600.01.T02  | Suppressor of K+ transport growth defect 1 (Fragment)                      |
| maker-1-augustus-gene-220.0-mRNA-1  | NA | NA       |        | Os01g0560200 | OsR498G0101340800.01.T01  | V-SNARE domain-containing protein                                          |
| maker-1-augustus-gene-220.11-mRNA-1 | NA | NA       |        |              |                           |                                                                            |
| maker-1-augustus-gene-221.42-mRNA-1 | NA | Japonica |        | Os01g0563500 | OsR498G0612516300.01.T06  |                                                                            |
| maker-1-augustus-gene-222.0-mRNA-1  | NA | NA       |        |              |                           |                                                                            |
| maker-1-augustus-gene-222.1-mRNA-1  | NA | NA       |        | Os01g0564300 |                           | Peptidylprolyl isomerase                                                   |
| maker-1-augustus-gene-232.20-mRNA-1 | NA | Indica   |        | Os01g0581900 | OsR498G0101405000.01.T02  | Putative homeodomain-like transcription factor superfamily protein isoform |
| maker-1-augustus-gene-233.32-mRNA-1 | NA | NA       |        |              |                           | Eukaryotic translation initiation factor 5B                                |
| maker-1-augustus-gene-234.31-mRNA-1 | NA | NA       |        | 0            | OsR498G0101414900.01.T01  |                                                                            |
| maker-1-augustus-gene-234.33-mRNA-1 | NA | NA       |        |              |                           | DRIM domain-containing protein                                             |
| maker-1-augustus-gene-234.43-mRNA-1 | NA | NA       |        | Os01g0585100 | OsR498G0101417300.01.T03  | Glycerophosphocholine acyltransferase 1                                    |
| maker-1-augustus-gene-234.53-mRNA-1 | NA | NA       |        | 0            | OsR498G0101414400.01.T02  | Myosin-Vb                                                                  |
| maker-1-augustus-gene-235.26-mRNA-1 | NA | NA       |        | Os01g0585700 | OsR498G0101420300.01.T04  | SIT4 phosphatase-associated family protein isoform 1                       |
| maker-1-augustus-gene-236.0-mRNA-1  | NA | NA       |        | Os01g0588700 | OsR498G0101430700.01.T01  | YJU2 splicing factor homolog isoform X1                                    |
| maker-1-augustus-gene-236.11-mRNA-1 | NA | NA       |        | Os01g0588000 | OsR498G0101427400.01.T01  | SHSP domain-containing protein (Fragment)                                  |
| maker-1-augustus-gene-236.13-mRNA-1 | NA | NA       |        | Os01g0588200 | OsR498G0101428400.01.T02  | Outer plastidial membrane protein porin                                    |
| maker-1-augustus-gene-24.50-mRNA-1  | NA | NA       |        | Os01g0144200 | OsR498G0306795400.01.T03  | Glucose-induced degradation protein 4                                      |
| maker-1-augustus-gene-24.56-mRNA-1  | NA | NA       |        | Os01g0144600 | OsR498G0100164300.01.T04  |                                                                            |
| maker-1-augustus-gene-24.58-mRNA-1  | NA | NA       |        | Os01g0144700 |                           | Pentatricopeptide repeat-containing protein chloroplastic                  |
| maker-1-augustus-gene-24.64-mRNA-1  | NA | NA       |        | Os01g0143300 | OsR498G0100159600.01.T01  | Mitochondrial glycoprotein family protein, putative isoform 1              |
| maker-1-augustus-gene-24.73-mRNA-1  | NA | NA       |        | Os01g0144000 | OsR498G0100162600.01.T01  | probable pectin methylesterase CGR2                                        |
| maker-1-augustus-gene-24.81-mRNA-1  | NA | NA       |        | Os01g0144300 | OsR498G0100163200.01.T01  |                                                                            |
| maker-1-augustus-gene-24.89-mRNA-1  | NA | NA       |        | 0            | OsR498G0100164200.01.T01  | Ubiquitin recognition factor in ER-associated degradation protein 1        |
| maker-1-augustus-gene-240.0-mRNA-1  | NA | NA       |        | 0            | OsR498G0101459700.01.T02  | Btz domain-containing protein (Fragment)                                   |
| maker-1-augustus-gene-240.10-mRNA-1 | NA | Japonica |        | Os01g0595700 | OsR498G0101462300.01.T01  | Ribosomal RNA apurinic site specific lyase                                 |
| maker-1-augustus-gene-240.13-mRNA-1 | NA | NA       |        | Os01g0595800 | OsR498G0101462500.01.T01  | FBD domain-containing protein                                              |
| maker-1-augustus-gene-240.15-mRNA-1 | NA | NA       |        | Os01g0595900 | OsR498G0101462700.01.T01  | FBD domain-containing protein (Fragment)                                   |
| maker-1-augustus-gene-240.17-mRNA-1 | NA | Japonica |        | Os01g0596000 | OsR498G0101462900.01.T01  | FBD domain-containing protein                                              |
| maker-1-augustus-gene-240.19-mRNA-1 | NA | NA       |        | Os01g0596100 | OsR498G0101463300.01.T01  | Ribosomal RNA apurinic site specific lyase-like                            |
| maker-1-augustus-gene-240.21-mRNA-1 | NA | NA       |        | Os01g0594500 | OsR498G0101457800.01.T01  |                                                                            |

|                                     |    |          |               |              |                          |                                                                             |
|-------------------------------------|----|----------|---------------|--------------|--------------------------|-----------------------------------------------------------------------------|
| maker-1-augustus-gene-240.23-mRNA-1 | NA | NA       |               | Os01g0594700 |                          | DAO domain-containing protein                                               |
| maker-1-augustus-gene-240.25-mRNA-1 | NA | NA       |               | Os01g0594900 | OsR498G0101459200.01.T01 | Retinoic acid induced 1                                                     |
| maker-1-augustus-gene-240.4-mRNA-1  | NA | Indica   |               | Os01g0719600 | OsR498G0101460100.01.T01 | HMA domain-containing protein (Fragment)                                    |
| maker-1-augustus-gene-240.7-mRNA-1  | NA | Japonica |               | Os01g0595600 | OsR498G0101462100.01.T01 | Strigolactone esterase                                                      |
| maker-1-augustus-gene-241.34-mRNA-1 | NA | NA       |               | Os01g0596300 | OsR498G0101463900.01.T01 | FBD domain-containing protein                                               |
| maker-1-augustus-gene-241.38-mRNA-1 | NA | NA       |               | Os01g0596700 | OsR498G0101466500.01.T01 | FBD domain-containing protein                                               |
| maker-1-augustus-gene-241.40-mRNA-1 | NA | Japonica |               | Os01g0597400 | OsR498G0101468700.01.T01 | Amino acid/polyamine transporter II                                         |
| maker-1-augustus-gene-241.42-mRNA-1 | NA | NA       |               | Os01g0597600 | OsR498G0101469100.01.T01 | Amino acid transporter, transmembrane                                       |
| maker-1-augustus-gene-241.43-mRNA-1 | NA | Indica   |               | Os01g0597800 | OsR498G0101469500.01.T01 | Glycosyltransferase                                                         |
| maker-1-augustus-gene-242.0-mRNA-1  | NA | NA       |               | Os01g0598200 | OsR498G0101471100.01.T02 | Calcineurin B-like protein 5 variant                                        |
| maker-1-augustus-gene-242.13-mRNA-1 | NA | NA       |               | Os01g0598900 | OsR498G0101473200.01.T03 | Cytoplasmic tRNA 2-thiolation protein 1                                     |
| maker-1-augustus-gene-242.17-mRNA-1 | NA | NA       |               | Os01g0600000 | OsR498G0101474200.01.T03 | Hydrogen-transporting ATP synthase, rotational mechanism                    |
| maker-1-augustus-gene-242.3-mRNA-1  | NA | Japonica |               | Os01g0599900 | OsR498G0101473900.01.T01 | SUN domain-containing protein 4                                             |
| maker-1-augustus-gene-242.6-mRNA-1  | NA | NA       |               |              |                          | Serine/threonine-protein phosphatase 2A 55 kDa regulatory subunit B         |
| maker-1-augustus-gene-243.37-mRNA-1 | NA | Indica   |               | Os01g0600300 | OsR498G0101474700.01.T01 |                                                                             |
| maker-1-augustus-gene-243.42-mRNA-1 | NA | Indica   | Kinase        | Os01g0601200 | OsR498G0101477700.01.T01 | Serine/threonine protein kinase                                             |
| maker-1-augustus-gene-243.44-mRNA-1 | NA | Indica   |               | Os02g0226200 | OsR498G0101475400.01.T01 | Pyridoxal phosphate phosphatase-related protein                             |
| maker-1-augustus-gene-243.49-mRNA-1 | NA | NA       |               | Os01g0602400 | OsR498G0101482200.01.T02 | Secologanin synthase                                                        |
| maker-1-augustus-gene-243.51-mRNA-1 | NA | Indica   |               | Os01g0602400 | OsR498G0101483000.01.T01 | Secologanin synthase                                                        |
| maker-1-augustus-gene-243.79-mRNA-1 | NA | Indica   |               | Os11g0566800 | OsR498G0101483200.01.T01 | Chalcone synthase F                                                         |
| maker-1-augustus-gene-244.0-mRNA-1  | NA | NA       | Kinase-TM     | 0            | OsR498G0101485500.01.T05 | Kinase protein with adenine nucleotide alpha hydrolases-like domain isoform |
| maker-1-augustus-gene-244.5-mRNA-1  | NA | NA       |               | Os01g0603300 | OsR498G0101487900.01.T01 | Transcription factor MYB53                                                  |
| maker-1-augustus-gene-244.7-mRNA-1  | NA | Japonica |               | Os01g0604100 | OsR498G0100035900.01.T05 | Usp domain-containing protein                                               |
| maker-1-augustus-gene-244.9-mRNA-1  | NA | NA       |               | Os01g0603000 | OsR498G0101486800.01.T01 | RGF repeats nuclear RNA binding protein A                                   |
| maker-1-augustus-gene-245.52-mRNA-1 | NA | Indica   |               | Os01g0605100 | OsR498G0101497700.01.T02 | Adenosinetriphosphatase                                                     |
| maker-1-augustus-gene-245.54-mRNA-1 | NA | NA       |               | Os01g0605300 | OsR498G0101497900.01.T01 | UBC core domain-containing protein (Fragment)                               |
| maker-1-augustus-gene-245.56-mRNA-1 | NA | NA       |               | Os01g0605400 | OsR498G0101497900.01.T02 | Protein GAMETE EXPRESSED 3                                                  |
| maker-1-augustus-gene-245.61-mRNA-1 | NA | NA       |               | Os01g0605700 | OsR498G0101498500.01.T01 | Bidirectional sugar transporter SWEET                                       |
| maker-1-augustus-gene-245.63-mRNA-1 | NA | NA       |               | Os01g0606000 | OsR498G0101499300.01.T01 | Bidirectional sugar transporter SWEET                                       |
| maker-1-augustus-gene-245.65-mRNA-1 | NA | NA       |               | Os01g0604700 | OsR498G0101495000.01.T01 | Transmembrane protein 33                                                    |
| maker-1-augustus-gene-245.69-mRNA-1 | NA | NA       |               | Os01g0605200 | OsR498G0101497400.01.T04 | DNL-type domain-containing protein (Fragment)                               |
| maker-1-augustus-gene-245.72-mRNA-1 | NA | Japonica |               | Os01g0605500 | OsR498G0101498200.01.T01 | Kinesin-like protein KIN-8A                                                 |
| maker-1-augustus-gene-245.75-mRNA-1 | NA | NA       |               | Os01g0605850 |                          |                                                                             |
| maker-1-augustus-gene-245.77-mRNA-1 | NA | NA       |               | Os01g0606200 |                          |                                                                             |
| maker-1-augustus-gene-246.30-mRNA-1 | NA | NA       |               | Os01g0606900 | OsR498G0101502300.01.T01 | J domain-containing protein                                                 |
| maker-1-augustus-gene-246.33-mRNA-1 | NA | NA       |               | 0            | OsR498G0101502900.01.T01 | AAI domain-containing protein (Fragment)                                    |
| maker-1-augustus-gene-246.35-mRNA-1 | NA | NA       |               | Os01g0607200 | OsR498G0101503300.01.T01 | Amino-acid permease BAT1                                                    |
| maker-1-augustus-gene-246.36-mRNA-1 | NA | NA       |               | Os01g0607200 | OsR498G0101503700.01.T01 | Amino-acid permease BAT1 like                                               |
| maker-1-augustus-gene-246.51-mRNA-1 | NA | NA       |               | Os08g0506200 | OsR498G1018350800.01.T01 | Zinc knuckle family protein                                                 |
| maker-1-augustus-gene-246.53-mRNA-1 | NA | NA       |               | Os01g0607400 | OsR498G0101504200.01.T03 | Transcriptional corepressor LEUNIG                                          |
| maker-1-augustus-gene-246.62-mRNA-1 | NA | NA       |               |              |                          | Transcriptional corepressor LEUNIG                                          |
| maker-1-augustus-gene-246.65-mRNA-1 | NA | Indica   | Kinase-LRR-TM | Os05g0588250 | OsR498G0101507200.01.T01 | Serine/threonine protein kinase                                             |
| maker-1-augustus-gene-247.21-mRNA-1 | NA | Japonica |               | Os01g0608366 | OsR498G0611518800.01.T01 | Peptidase A1 domain-containing protein (Fragment)                           |
| maker-1-augustus-gene-247.24-mRNA-1 | NA | NA       |               | 0            | OsR498G0101509900.01.T01 | RING-H2 finger protein ATL5A                                                |
| maker-1-augustus-gene-247.25-mRNA-1 | NA | NA       | CC-NBS-TM     | 0            | OsR498G1120729200.01.T01 | AAA domain-containing protein                                               |
| maker-1-augustus-gene-247.28-mRNA-1 | NA | NA       |               | Os01g0609066 | OsR498G0101514000.01.T02 | ABC transporter G family member 34                                          |
| maker-1-augustus-gene-247.31-mRNA-1 | NA | NA       |               | Os01g0609300 | OsR498G0101515200.01.T01 | pleiotropic drug resistance protein 1-like                                  |
| maker-1-augustus-gene-248.0-mRNA-1  | NA | NA       |               | Os01g0610100 | OsR498G0101518900.01.T01 | ATPase, FO/VO complex, subunit C protein                                    |
| maker-1-augustus-gene-248.11-mRNA-1 | NA | NA       |               | Os01g0611000 | OsR498G0101522300.01.T01 | GTP-binding nuclear protein Ran-3                                           |
| maker-1-augustus-gene-248.13-mRNA-1 | NA | NA       |               | Os01g0611100 | OsR498G0101522700.01.T01 | GTP-binding nuclear protein Ran-1                                           |
| maker-1-augustus-gene-248.16-mRNA-1 | NA | NA       |               | Os01g0609900 | OsR498G0101517800.01.T03 | ABC transporter G family member 37                                          |
| maker-1-augustus-gene-248.20-mRNA-1 | NA | NA       |               | Os01g0610500 | OsR498G0101520600.01.T01 | Yip1 domain-containing protein                                              |
| maker-1-augustus-gene-248.23-mRNA-1 | NA | NA       |               | Os01g0610600 | OsR498G0101521000.01.T03 | Carbon catabolite repressor protein 4 like 6                                |
| maker-1-augustus-gene-248.29-mRNA-1 | NA | NA       |               | Os01g0610700 | OsR498G0101521200.01.T01 | RING-CH-type domain-containing protein (Fragment)                           |
| maker-1-augustus-gene-248.3-mRNA-1  | NA | NA       |               | Os01g0610300 | OsR498G0101519900.01.T03 | BAH domain-containing protein                                               |
| maker-1-augustus-gene-248.9-mRNA-1  | NA | Indica   |               | Os01g0610400 | OsR498G0101520100.01.T02 | N-alpha-acetyltransferase 50                                                |
| maker-1-augustus-gene-249.0-mRNA-1  | NA | NA       |               | 0            | OsR498G0101523300.01.T01 |                                                                             |
| maker-1-augustus-gene-249.1-mRNA-1  | NA | Indica   |               | Os07g0218200 | OsR498G0101526300.01.T01 | (S)-beta-bisabolene synthase                                                |
| maker-1-augustus-gene-249.13-mRNA-1 | NA | NA       |               | 0            | OsR498G0101527000.01.T08 | DNA methyl transferase4                                                     |
| maker-1-augustus-gene-249.19-mRNA-1 | NA | NA       |               | Os01g0612600 | OsR498G0101530400.01.T06 | Putative zinc finger, RING/FYVE/PHD-type                                    |
| maker-1-augustus-gene-249.3-mRNA-1  | NA | Japonica |               | Os01g0612100 | OsR498G0306062000.01.T02 | Small subunit ribosomal protein (Fragment)                                  |

|                                     |    |        |           |              |                          |                                                         |
|-------------------------------------|----|--------|-----------|--------------|--------------------------|---------------------------------------------------------|
| maker-1-augustus-gene-249.5-mRNA-1  | NA | NA     |           | Os01g0612200 | OsR498G0101528100.01.T01 | Cytochrome c oxidase polypeptide Vb                     |
| maker-1-augustus-gene-249.9-mRNA-1  | NA | Indica |           | Os01g0612500 | OsR498G0101530100.01.T01 | Acyl-protein thioesterase 2                             |
| maker-1-augustus-gene-25.0-mRNA-1   | NA | NA     |           | 0            | OsR498G0100170700.01.T01 | Glycosyltransferases                                    |
| maker-1-augustus-gene-25.2-mRNA-1   | NA | NA     |           |              |                          | TFIIIS N-terminal domain-containing protein (Fragment)  |
| maker-1-augustus-gene-250.0-mRNA-1  | NA | Indica |           | Os01g0612700 | OsR498G0101532700.01.T03 | zf-LSD1 domain-containing protein                       |
| maker-1-augustus-gene-250.12-mRNA-1 | NA | NA     |           | Os01g0614300 | OsR498G0101538300.01.T01 | Protein trichome birefringence                          |
| maker-1-augustus-gene-250.14-mRNA-1 | NA | Indica |           | Os01g0614700 | OsR498G0101539500.01.T01 | Adaptin ear-binding coat-associated protein 1           |
| maker-1-augustus-gene-250.19-mRNA-1 | NA | NA     |           | Os01g0613500 | OsR498G0101536000.01.T01 | Cysteine proteinase-like                                |
| maker-1-augustus-gene-250.21-mRNA-1 | NA | NA     |           | Os01g0613800 | OsR498G0101536800.01.T01 | Senescence-specific cysteine protease SAG39             |
| maker-1-augustus-gene-250.23-mRNA-1 | NA | NA     |           | Os01g0613900 | OsR498G0101537000.01.T02 | Maternal effect embryo arrest 18                        |
| maker-1-augustus-gene-250.30-mRNA-1 | NA | NA     |           | Os01g0614900 | OsR498G0101539800.01.T06 | Ubiquitin-like modifier-activating enzyme ATG7          |
| maker-1-augustus-gene-250.4-mRNA-1  | NA | NA     |           | Os01g0612800 | OsR498G0101532900.01.T03 | Plastid transcriptionally active protein                |
| maker-1-augustus-gene-250.6-mRNA-1  | NA | NA     |           | 0            | OsR498G0101533500.01.T01 | GDSL esterase/lipase                                    |
| maker-1-augustus-gene-250.9-mRNA-1  | NA | NA     |           | Os01g0613300 | OsR498G0101535700.01.T01 | Lipoprotein lpqB (Fragment)                             |
| maker-1-augustus-gene-251.27-mRNA-1 | NA | NA     |           | Os01g0616100 | OsR498G0101542500.01.T07 | Kinase family with ARM repeat domain-containing protein |
| maker-1-augustus-gene-251.34-mRNA-1 | NA | Indica |           | Os05g0587300 | OsR498G0101545900.01.T02 | TPR repeat-containing thioredoxin TTL1                  |
| maker-1-augustus-gene-251.38-mRNA-1 | NA | NA     |           | Os01g0616500 | OsR498G0101546500.01.T01 | 39S ribosomal protein L22, mitochondrial-like           |
| maker-1-augustus-gene-251.41-mRNA-1 | NA | NA     |           |              |                          | Berberine bridge enzyme-like protein 13                 |
| maker-1-augustus-gene-251.43-mRNA-1 | NA | NA     |           | Os01g0615200 | OsR498G0101541000.01.T02 | 10-deacetylbaecatin III-10-O-acetyl transferase         |
| maker-1-augustus-gene-251.45-mRNA-1 | NA | NA     |           | Os01g0615300 | OsR498G0101541200.01.T01 | 10-deacetylbaecatin III-10-O-acetyl transferase         |
| maker-1-augustus-gene-251.47-mRNA-1 | NA | NA     |           | Os01g0616400 | OsR498G0101546400.01.T02 | Zinc finger CCHC domain-containing protein 8            |
| maker-1-augustus-gene-252.30-mRNA-1 | NA | NA     |           | Os01g0617700 | OsR498G0101550500.01.T04 |                                                         |
| maker-1-augustus-gene-252.36-mRNA-1 | NA | NA     |           | Os01g0617900 | OsR498G0101550900.01.T01 | PsbP domain-containing protein 5 chloroplastic          |
| maker-1-augustus-gene-252.39-mRNA-1 | NA | Indica |           | Os01g0618200 | OsR498G0101551700.01.T02 | Protein-serine/threonine phosphatase                    |
| maker-1-augustus-gene-252.41-mRNA-1 | NA | Indica |           | Os05g0573300 | OsR498G0101547800.01.T01 | CTP synthase                                            |
| maker-1-augustus-gene-252.47-mRNA-1 | NA | NA     |           | Os01g0617500 | OsR498G0101549200.01.T01 | N-alpha-acetyltransferase 16, NaTA auxiliary subunit    |
| maker-1-augustus-gene-252.54-mRNA-1 | NA | NA     |           | Os01g0617800 | OsR498G0101550800.01.T01 | Unconventional prefoldin RPB5 interactor 1              |
| maker-1-augustus-gene-252.58-mRNA-1 | NA | NA     |           | Os01g0618100 | OsR498G0101551600.01.T02 | Auxin-induced protein PCNT115                           |
| maker-1-augustus-gene-253.27-mRNA-1 | NA | NA     |           | Os01g0618400 | OsR498G0101552900.01.T01 | DEAD-box ATP-dependent RNA helicase                     |
| maker-1-augustus-gene-253.31-mRNA-1 | NA | NA     |           | Os01g0618500 | OsR498G0101553100.01.T01 | DEAD-box ATP-dependent RNA helicase                     |
| maker-1-augustus-gene-253.34-mRNA-1 | NA | NA     |           | 0            | OsR498G0101553700.01.T01 | Regulatory component of ABA receptor 1                  |
| maker-1-augustus-gene-253.38-mRNA-1 | NA | Indica |           | Os01g0618900 | OsR498G0101554700.01.T01 | Pectin lyase-like superfamily protein (Fragment)        |
| maker-1-augustus-gene-253.42-mRNA-1 | NA | NA     |           | Os01g0618300 | OsR498G0101552600.01.T01 | Myb-like domain-containing protein                      |
| maker-1-augustus-gene-253.44-mRNA-1 | NA | NA     |           | 0            | OsR498G0101554200.01.T03 | ATP-dependent metalloprotease                           |
| maker-1-augustus-gene-253.51-mRNA-1 | NA | Indica |           | Os01g0619000 | OsR498G0101555000.01.T01 | Polypyrimidine tract-binding                            |
| maker-1-augustus-gene-254.0-mRNA-1  | NA | Indica |           | Os01g0619800 | OsR498G0101557500.01.T02 | Chitinase domain-containing protein 1                   |
| maker-1-augustus-gene-254.12-mRNA-1 | NA | NA     |           | 0            | OsR498G0101562000.01.T03 | Extra-large G-protein-like                              |
| maker-1-augustus-gene-254.15-mRNA-1 | NA | NA     | Kinase-TM | Os01g0621600 | OsR498G0101562800.01.T02 | Serine/threonine-protein kinase MARK2                   |
| maker-1-augustus-gene-254.3-mRNA-1  | NA | NA     |           | Os01g0620100 | OsR498G0101558200.01.T01 | Nucleoporin SEH1                                        |
| maker-1-augustus-gene-254.9-mRNA-1  | NA | Indica |           | Os01g0621200 | OsR498G0101561600.01.T01 | probable GABA transporter 2                             |
| maker-1-augustus-gene-255.24-mRNA-1 | NA | NA     |           | Os01g0621700 | OsR498G0101563100.01.T01 | TH1 domain-containing protein (Fragment)                |
| maker-1-augustus-gene-255.29-mRNA-1 | NA | Indica | Kinase-TM | Os05g0585500 | OsR498G0101565900.01.T01 | Calcium-dependent protein kinase 1 isoform A            |
| maker-1-augustus-gene-255.34-mRNA-1 | NA | NA     |           | 0            | OsR498G0101565200.01.T03 | Glycosyl transferase family 1 protein                   |
| maker-1-augustus-gene-255.40-mRNA-1 | NA | NA     |           | Os01g0622300 | OsR498G0101565600.01.T03 | Uroporphyrinogen decarboxylase like                     |
| maker-1-augustus-gene-255.42-mRNA-1 | NA | NA     |           | Os01g0622700 | OsR498G0101566200.01.T01 | Probable protein ABIL1                                  |
| maker-1-augustus-gene-255.46-mRNA-1 | NA | Indica |           | Os01g0623200 | OsR498G0101568400.01.T03 | S-type anion channel SLAH3                              |
| maker-1-augustus-gene-256.52-mRNA-1 | NA | NA     |           | Os01g0623500 | OsR498G0101571300.01.T01 | ATPase family AAA domain-containing protein 1-A         |
| maker-1-augustus-gene-256.57-mRNA-1 | NA | NA     |           | Os01g0623900 | OsR498G0101572500.01.T01 | probable membrane-associated kinase regulator 2         |
| maker-1-augustus-gene-256.58-mRNA-1 | NA | NA     |           | Os01g0624400 | OsR498G0101574300.01.T02 | Late embryogenesis abundant                             |
| maker-1-augustus-gene-256.60-mRNA-1 | NA | NA     |           | Os01g0624500 | OsR498G0101574500.01.T01 | Suppressor of the G2                                    |
| maker-1-augustus-gene-256.64-mRNA-1 | NA | NA     |           | 0            | OsR498G0101575300.01.T01 | Kinesin-like protein KIN-13B                            |
| maker-1-augustus-gene-256.71-mRNA-1 | NA | Indica |           | Os01g0891100 | OsR498G0101571600.01.T01 | Endo-polygalacturonase                                  |
| maker-1-augustus-gene-256.73-mRNA-1 | NA | NA     |           | Os01g0624000 | OsR498G0101573400.01.T02 | Neutral ceramidase                                      |
| maker-1-augustus-gene-257.38-mRNA-1 | NA | NA     |           | 0            | OsR498G0101577500.01.T01 |                                                         |
| maker-1-augustus-gene-257.44-mRNA-1 | NA | NA     |           | Os01g0626400 | OsR498G0101577900.01.T01 | WRKY transcription factor                               |
| maker-1-augustus-gene-257.46-mRNA-1 | NA | NA     |           | Os01g0627400 | OsR498G0101580700.01.T01 | Secologanin synthase                                    |
| maker-1-augustus-gene-257.48-mRNA-1 | NA | NA     |           | Os01g0627800 | OsR498G0101582300.01.T01 | Secologanin synthase                                    |
| maker-1-augustus-gene-257.50-mRNA-1 | NA | NA     |           | Os01g0627900 | OsR498G0101582500.01.T01 | Cytochrome P450 monooxygenase                           |
| maker-1-augustus-gene-257.62-mRNA-1 | NA | NA     |           |              |                          |                                                         |
| maker-1-augustus-gene-257.64-mRNA-1 | NA | NA     |           | Os01g0627500 | OsR498G0101581000.01.T01 | Secologanin synthase                                    |
| maker-1-augustus-gene-257.67-mRNA-1 | NA | Indica |           | Os01g0627933 | OsR498G0101582200.01.T01 | Cytochrome P450 monooxygenase                           |

|                                     |    |          |           |              |                          |                                                                                 |
|-------------------------------------|----|----------|-----------|--------------|--------------------------|---------------------------------------------------------------------------------|
| maker-1-augustus-gene-258.0-mRNA-1  | NA | NA       |           | Os01g0628900 | OsR498G0101585300.01.T01 |                                                                                 |
| maker-1-augustus-gene-258.7-mRNA-1  | NA | NA       |           | 0            | OsR498G0101586100.01.T07 | FCP1 homology domain-containing protein                                         |
| maker-1-augustus-gene-26.27-mRNA-1  | NA | NA       |           |              |                          | E3 ubiquitin-protein ligase                                                     |
| maker-1-augustus-gene-26.40-mRNA-1  | NA | NA       |           | Os01g0147700 | OsR498G0100172800.01.T01 | Factor of DNA methylation 1                                                     |
| maker-1-augustus-gene-26.43-mRNA-1  | NA | NA       |           | 0            | OsR498G0100173000.01.T01 | DUF547 domain-containing protein                                                |
| maker-1-augustus-gene-26.48-mRNA-1  | NA | NA       |           | Os01g0147900 | OsR498G0100173200.01.T01 | Triose phosphate isomerase cytosolic isoform                                    |
| maker-1-augustus-gene-26.55-mRNA-1  | NA | Japonica |           | Os01g0148100 | OsR498G0100174000.01.T04 |                                                                                 |
| maker-1-augustus-gene-260.13-mRNA-1 | NA | NA       |           | Os01g0633400 | OsR498G0101599100.01.T01 | Polypeptide                                                                     |
| maker-1-augustus-gene-260.17-mRNA-1 | NA | Indica   |           | Os01g0633500 | OsR498G0101599900.01.T01 | Dihydroflavonol-4-reductase                                                     |
| maker-1-augustus-gene-260.2-mRNA-1  | NA | NA       |           | Os01g0632700 | OsR498G0101597500.01.T03 |                                                                                 |
| maker-1-augustus-gene-260.20-mRNA-1 | NA | NA       |           | Os01g0633000 | OsR498G0101598600.01.T01 | 50S ribosomal protein L31, chloroplastic                                        |
| maker-1-augustus-gene-260.3-mRNA-1  | NA | NA       |           |              |                          | ATP-dependent DNA helicase                                                      |
| maker-1-augustus-gene-260.7-mRNA-1  | NA | NA       |           | Os01g0633100 | OsR498G0101598700.01.T09 | Glucose-1-phosphate adenylyltransferase large subunit, chloroplastic/amyloplast |
| maker-1-augustus-gene-261.42-mRNA-1 | NA | Japonica |           | Os01g0634900 | OsR498G0101602500.01.T02 | Cystathionine beta-synthase family protein                                      |
| maker-1-augustus-gene-261.51-mRNA-1 | NA | NA       |           | Os01g0634300 | OsR498G0101600400.01.T03 | Auxilin-like protein 1                                                          |
| maker-1-augustus-gene-261.55-mRNA-1 | NA | Indica   |           | Os01g0842500 | OsR498G0101601600.01.T01 | Laccase                                                                         |
| maker-1-augustus-gene-262.0-mRNA-1  | NA | NA       |           | Os01g0636500 | OsR498G0101607300.01.T03 | Polygalacturonase                                                               |
| maker-1-augustus-gene-262.11-mRNA-1 | NA | NA       |           | Os01g0636700 |                          | SWI/SNF-related matrix-associated actin-dependent regulator 1 of chromatin      |
| maker-1-augustus-gene-262.17-mRNA-1 | NA | Japonica |           | Os01g0637100 | OsR498G0101609600.01.T02 | F-box domain-containing protein (Fragment)                                      |
| maker-1-augustus-gene-263.10-mRNA-1 | NA | NA       |           | Os01g0637600 | OsR498G0101612800.01.T01 | Peptide deformylase                                                             |
| maker-1-augustus-gene-264.35-mRNA-1 | NA | NA       |           | Os01g0639900 | OsR498G0101621700.01.T03 | Carbonic anhydrase, chloroplastic                                               |
| maker-1-augustus-gene-264.42-mRNA-1 | NA | NA       |           | Os01g0640000 | OsR498G0101621900.01.T01 | Carbonic anhydrase                                                              |
| maker-1-augustus-gene-264.45-mRNA-1 | NA | Japonica |           | Os01g0640132 | OsR498G0101621700.01.T08 | Carbonic anhydrase                                                              |
| maker-1-augustus-gene-264.47-mRNA-1 | NA | NA       |           | Os01g0640600 | OsR498G0101624100.01.T02 | Exostosin domain-containing protein (Fragment)                                  |
| maker-1-augustus-gene-264.49-mRNA-1 | NA | NA       | Kinase-TM | Os01g0641000 | OsR498G0101624900.01.T01 | Serine/threonine-protein kinase STY8                                            |
| maker-1-augustus-gene-264.51-mRNA-1 | NA | NA       |           | 0            | OsR498G0101625100.01.T01 | 5'-deoxynucleotidase                                                            |
| maker-1-augustus-gene-264.56-mRNA-1 | NA | NA       |           | Os01g0640200 | OsR498G0101623200.01.T01 | VWFA domain-containing protein (Fragment)                                       |
| maker-1-augustus-gene-264.57-mRNA-1 | NA | NA       |           | Os01g0640800 | OsR498G0101624600.01.T04 | Ribosomal RNA large subunit methyltransferase RlmN                              |
| maker-1-augustus-gene-265.34-mRNA-1 | NA | Indica   |           | Os01g0642000 | OsR498G0101627300.01.T07 | Isoprenylcysteine alpha-carbonyl methyltransferase ICME                         |
| maker-1-augustus-gene-265.37-mRNA-1 | NA | NA       | Kinase-TM |              |                          | Non-specific serine/threonine protein kinase                                    |
| maker-1-augustus-gene-265.45-mRNA-1 | NA | NA       |           |              |                          |                                                                                 |
| maker-1-augustus-gene-265.49-mRNA-1 | NA | NA       |           |              |                          | SWI/SNF-related matrix-associated actin-dependent regulator of chromatin        |
| maker-1-augustus-gene-265.51-mRNA-1 | NA | NA       |           | Os01g0642900 | OsR498G0101632000.01.T03 | Single-stranded DNA-binding protein, mitochondrial                              |
| maker-1-augustus-gene-266.5-mRNA-1  | NA | NA       | Kinase-TM |              |                          | Mitogen-activated protein kinase                                                |
| maker-1-augustus-gene-267.0-mRNA-1  | NA | NA       |           | Os01g0645200 | OsR498G0101641700.01.T02 | Sodium/pyruvate cotransporter BASS2, chloroplastic                              |
| maker-1-augustus-gene-267.11-mRNA-1 | NA | Japonica |           | Os08g0112000 | OsR498G0101647000.01.T05 | ATP-dependent DNA helicase                                                      |
| maker-1-augustus-gene-268.0-mRNA-1  | NA | NA       |           | Os01g0647700 | OsR498G0101650500.01.T04 | AB hydrolase-1 domain-containing protein                                        |
| maker-1-augustus-gene-268.4-mRNA-1  | NA | Indica   |           | Os05g0347000 | OsR498G0101653700.01.T03 | Transcription initiation factor TFIID subunit 7                                 |
| maker-1-augustus-gene-269.0-mRNA-1  | NA | NA       |           |              |                          | Small-subunit processome, Utp12                                                 |
| maker-1-augustus-gene-269.26-mRNA-1 | NA | NA       |           | Os01g0649200 | OsR498G0101655500.01.T02 | GDSL-like Lipase/Acylhydrolase superfamily protein, putative                    |
| maker-1-augustus-gene-269.6-mRNA-1  | NA | NA       |           | Os01g0649100 | OsR498G0101655100.01.T01 | Malate dehydrogenase                                                            |
| maker-1-augustus-gene-27.39-mRNA-1  | NA | NA       |           | Os01g0148700 | OsR498G0100175700.01.T02 |                                                                                 |
| maker-1-augustus-gene-27.45-mRNA-1  | NA | NA       |           | Os01g0150200 | OsR498G0100180300.01.T03 | Very-long-chain (3R)-3-hydroxyacyl-CoA dehydratase PASTICCINO 2                 |
| maker-1-augustus-gene-27.51-mRNA-1  | NA | Indica   |           | Os01g0150500 | OsR498G0100180500.01.T03 | Very-long-chain (3R)-3-hydroxyacyl-CoA dehydratase                              |
| maker-1-augustus-gene-27.57-mRNA-1  | NA | Japonica |           | Os01g0150500 | OsR498G0100180900.01.T01 | Very-long-chain (3R)-3-hydroxyacyl-CoA dehydratase                              |
| maker-1-augustus-gene-27.60-mRNA-1  | NA | NA       |           | 0            | OsR498G0100181300.01.T05 |                                                                                 |
| maker-1-augustus-gene-27.67-mRNA-1  | NA | NA       |           | Os01g0149900 | OsR498G0100179000.01.T01 |                                                                                 |
| maker-1-augustus-gene-270.0-mRNA-1  | NA | Japonica |           | Os01g0650900 | OsR498G0101660700.01.T01 | GDSL esterase/lipase                                                            |
| maker-1-augustus-gene-270.19-mRNA-1 | NA | NA       |           | Os01g0650700 |                          | Transposon protein, putative, CACTA, En/Spm sub-class                           |
| maker-1-augustus-gene-271.40-mRNA-1 | NA | NA       |           | Os01g0653800 | OsR498G0101671400.01.T03 | Transcription initiation factor TFIID subunit 5                                 |
| maker-1-augustus-gene-272.0-mRNA-1  | NA | NA       |           | Os01g0654100 | OsR498G0101676300.01.T01 | CTP synthase (glutamine hydrolyzing)                                            |
| maker-1-augustus-gene-272.15-mRNA-1 | NA | NA       |           | Os01g0654200 | OsR498G0101676600.01.T04 | Endopeptidase S2P                                                               |
| maker-1-augustus-gene-272.20-mRNA-1 | NA | NA       |           | Os01g0654500 | OsR498G0101677000.01.T01 | Isocitrate dehydrogenase [NADP]                                                 |
| maker-1-augustus-gene-272.8-mRNA-1  | NA | NA       |           | 0            | OsR498G0101676700.01.T01 | Arp2/3 complex 34 kDa subunit                                                   |
| maker-1-augustus-gene-273.0-mRNA-1  | NA | NA       |           | Os01g0654966 |                          |                                                                                 |
| maker-1-augustus-gene-273.19-mRNA-1 | NA | NA       |           | Os01g0655500 | OsR498G0101681300.01.T01 | Serine/threonine-protein kinase STN7, chloroplastic                             |
| maker-1-augustus-gene-273.25-mRNA-1 | NA | NA       |           | Os01g0655800 | OsR498G0101682500.01.T08 | Fatty acyl-CoA synthetase A                                                     |
| maker-1-augustus-gene-273.32-mRNA-1 | NA | NA       |           | Os01g0656200 | OsR498G0101683700.01.T01 | Protein-serine/threonine phosphatase                                            |
| maker-1-augustus-gene-273.8-mRNA-1  | NA | NA       |           | 0            | OsR498G0101680700.01.T01 | histone-lysine N-methyltransferase ATX4-like isoform X1                         |
| maker-1-augustus-gene-274.5-mRNA-1  | NA | NA       |           | Os01g0656400 | OsR498G0101685000.01.T01 | DNA-binding WRKY                                                                |
| maker-1-augustus-gene-275.39-mRNA-1 | NA | NA       |           | Os01g0658400 | OsR498G0101690600.01.T03 | UBC core domain-containing protein (Fragment)                                   |



|                                     |    |          |               |              |                           |                                                                           |
|-------------------------------------|----|----------|---------------|--------------|---------------------------|---------------------------------------------------------------------------|
| maker-1-augustus-gene-275.41-mRNA-1 | NA | NA       |               | 0            | OsR498G0101690800.01.T01  | Vacuolar protein sorting-associated protein 25                            |
| maker-1-augustus-gene-276.26-mRNA-1 | NA | NA       |               | Os01g0660900 | OsR498G0101697900.01.T02  | DUF588 domain-containing protein                                          |
| maker-1-augustus-gene-277.71-mRNA-1 | NA | Japonica |               | Os01g0662800 | OsR498G0101701800.01.T01  | GATA transcription factor 19                                              |
| maker-1-augustus-gene-278.36-mRNA-1 | NA | NA       |               | Os01g0664500 | OsR498G0101707900.01.T05  | Endosulphine                                                              |
| maker-1-augustus-gene-278.40-mRNA-1 | NA | NA       | Kinase-TM     | Os01g0665200 | OsR498G0101709700.01.T01  | Mitogen-activated protein kinase                                          |
| maker-1-augustus-gene-278.45-mRNA-1 | NA | NA       |               | Os01g0665400 | OsR498G0101710100.01.T02  | Ribokinase                                                                |
| maker-1-augustus-gene-278.50-mRNA-1 | NA | NA       |               | Os01g0665300 | OsR498G0101710000.01.T02  | FCP1 homology domain-containing protein                                   |
| maker-1-augustus-gene-28.0-mRNA-1   | NA | NA       |               |              |                           | Very-long-chain (3R)-3-hydroxyacyl-CoA dehydratase                        |
| maker-1-augustus-gene-28.17-mRNA-1  | NA | NA       |               | Os01g0151400 | OsR498G0100183500.01.T01  | glutathione hydrolase 3                                                   |
| maker-1-augustus-gene-28.19-mRNA-1  | NA | NA       |               | Os01g0151600 | OsR498G0100183900.01.T01  | K-stimulated pyrophosphate-energized sodium pump protein                  |
| maker-1-augustus-gene-28.25-mRNA-1  | NA | NA       |               | Os01g0151700 | OsR498G0100184500.01.T02  | Short-chain dehydrogenase TIC 32, chloroplastic                           |
| maker-1-augustus-gene-28.3-mRNA-1   | NA | Indica   |               | Os01g0150800 | OsR498G0100182100.01.T03  | Very-long-chain (3R)-3-hydroxyacyl-CoA dehydratase                        |
| maker-1-augustus-gene-28.4-mRNA-1   | NA | NA       |               | Os01g0150800 |                           | Very-long-chain (3R)-3-hydroxyacyl-CoA dehydratase                        |
| maker-1-augustus-gene-280.36-mRNA-1 | NA | NA       |               | 0            | OsR498G0101724300.01.T03  | PHD-type domain-containing protein (Fragment)                             |
| maker-1-augustus-gene-285.6-mRNA-1  | NA | NA       |               | 0            | OsR498G0101756500.01.T01  | Putative Pyridoxal phosphate (PLP)-dependent transferases superfamily pro |
| maker-1-augustus-gene-287.48-mRNA-1 | NA | NA       |               | Os01g0681000 | OsR498G0101770000.01.T01  | Diacylglycerol O-acyltransferase                                          |
| maker-1-augustus-gene-289.0-mRNA-1  | NA | Indica   |               | Os01g0684200 | OsR498G0101781300.01.T02  | protein prenyltransferase alpha subunit repeat-containing protein 1-B     |
| maker-1-augustus-gene-29.61-mRNA-1  | NA | NA       | Kinase-LRR-TM | Os01g0153000 | OsR498G0100190500.01.T02  | LRR receptor-like serine/threonine-protein kinase EFR                     |
| maker-1-augustus-gene-29.92-mRNA-1  | NA | NA       |               |              |                           | DUF674 domain-containing protein                                          |
| maker-1-augustus-gene-292.0-mRNA-1  | NA | NA       |               |              |                           | Protein kinase domain-containing protein                                  |
| maker-1-augustus-gene-292.1-mRNA-1  | NA | NA       | Kinase-TM     | Os01g0690800 | OsR498G0101800500.01.T01  | Protein kinase domain-containing protein (Fragment)                       |
| maker-1-augustus-gene-294.43-mRNA-1 | NA | NA       |               |              |                           | p-glycoprotein-like                                                       |
| maker-1-augustus-gene-297.0-mRNA-1  | NA | Japonica |               | Os01g0701300 | OsR498G0101836900.01.T01  | Thromboxane-A synthase                                                    |
| maker-1-augustus-gene-297.1-mRNA-1  | NA | Japonica |               | Os01g0701300 | OsR498G0101836700.01.T01  | Thromboxane-A synthase                                                    |
| maker-1-augustus-gene-304.9-mRNA-1  | NA | Japonica |               | Os01g0714800 | OsR498G0101881000.01.T01  | WRKY transcription factor                                                 |
| maker-1-augustus-gene-308.8-mRNA-1  | NA | NA       |               | Os11g0500100 |                           | HAT dimerization domain-containing protein / transposase-related          |
| maker-1-augustus-gene-309.64-mRNA-1 | NA | NA       |               | Os01g0726100 | OsR498G0101925400.01.T02  | Non-classical arabinogalactan protein 31-like                             |
| maker-1-augustus-gene-318.12-mRNA-1 | NA | NA       |               | 0            | OsR498G01019076900.01.T01 | N-acetylmuramoyl-L-alanine amidase                                        |
| maker-1-augustus-gene-32.49-mRNA-1  | NA | NA       | LRR-TM        |              |                           | LRR receptor-like serine/threonine-protein kinase FLS2                    |
| maker-1-augustus-gene-32.54-mRNA-1  | NA | NA       |               | 0            | OsR498G0204301500.01.T06  | ATP-dependent DNA helicase                                                |
| maker-1-augustus-gene-320.23-mRNA-1 | NA | NA       |               | Os01g0767100 | OsR498G0102058600.01.T02  | Lysosomal Pro-X carboxypeptidase                                          |
| maker-1-augustus-gene-330.7-mRNA-1  | NA | NA       |               | Os01g0767700 | OsR498G0102059100.01.T04  | RNA helicase                                                              |
| maker-1-augustus-gene-333.28-mRNA-1 | NA | Japonica |               | Os01g0772400 | OsR498G0102072700.01.T02  | Coenzyme Q-binding protein COQ, mitochondrial                             |
| maker-1-augustus-gene-333.67-mRNA-1 | NA | Indica   |               | Os01g0772150 | OsR498G0102071800.01.T01  | Histone-lysine N-methyltransferase SUV39                                  |
| maker-1-augustus-gene-333.69-mRNA-1 | NA | Indica   |               | Os05g0509900 | OsR498G0102072200.01.T01  | Transcription initiation factor IIF subunit beta                          |
| maker-1-augustus-gene-333.71-mRNA-1 | NA | NA       |               | Os01g0772500 | OsR498G0102073000.01.T01  | Beta-glucuronosyltransferase GlcAT14A                                     |
| maker-1-augustus-gene-334.10-mRNA-1 | NA | NA       |               |              |                           | FBD domain-containing protein                                             |
| maker-1-augustus-gene-336.11-mRNA-1 | NA | NA       |               | 0            | OsR498G0102091900.01.T01  | RRM domain-containing protein (Fragment)                                  |
| maker-1-augustus-gene-336.6-mRNA-1  | NA | NA       |               | Os01g0777300 | OsR498G0102091700.01.T01  | Exonuclease 1                                                             |
| maker-1-augustus-gene-336.9-mRNA-1  | NA | NA       |               | 0            | OsR498G0102091900.01.T01  | RRM domain-containing protein (Fragment)                                  |
| maker-1-augustus-gene-337.58-mRNA-1 | NA | NA       |               | Os01g0780800 | OsR498G0102100200.01.T01  | SAND domain-containing protein                                            |
| maker-1-augustus-gene-338.4-mRNA-1  | NA | NA       |               | Os01g0782200 | OsR498G0102103600.01.T02  | Sphingosine kinase                                                        |
| maker-1-augustus-gene-343.59-mRNA-1 | NA | NA       |               | Os01g0794400 | OsR498G0102132300.01.T02  | Probable nucleoredoxin 2                                                  |
| maker-1-augustus-gene-343.64-mRNA-1 | NA | NA       |               | Os01g0795000 | OsR498G0102133700.01.T02  | Subtilisin-like protease                                                  |
| maker-1-augustus-gene-343.78-mRNA-1 | NA | NA       |               | Os01g0795200 | OsR498G0102134700.01.T03  | Subtilisin-like protease                                                  |
| maker-1-augustus-gene-351.29-mRNA-1 | NA | NA       | Kinase-LRR-TM | 0            | OsR498G0102189200.01.T01  | Putative light repressible receptor protein kinase                        |
| maker-1-augustus-gene-351.32-mRNA-1 | NA | NA       |               | 0            | OsR498G0102190000.01.T03  | Glutamate formimidoyltransferase                                          |
| maker-1-augustus-gene-352.48-mRNA-1 | NA | NA       | Kinase-LRR-TM | 0            | OsR498G0102192000.01.T01  | Putative light repressible receptor protein kinase                        |
| maker-1-augustus-gene-357.16-mRNA-1 | NA | NA       |               | Os01g0819900 | OsR498G0102222600.01.T01  | Inactive serine/threonine-protein kinase scy1                             |
| maker-1-augustus-gene-357.6-mRNA-1  | NA | NA       |               | Os01g0819400 | OsR498G0102220900.01.T02  | UBC core domain-containing protein (Fragment)                             |
| maker-1-augustus-gene-357.8-mRNA-1  | NA | NA       |               | Os01g0819700 | OsR498G0102222100.01.T02  | Protein ENHANCED DISEASE RESISTANCE 4                                     |
| maker-1-augustus-gene-36.32-mRNA-1  | NA | NA       |               | 0            | OsR498G0100235700.01.T03  | OCRE domain-containing protein                                            |
| maker-1-augustus-gene-36.38-mRNA-1  | NA | NA       |               | 0            | OsR498G0100237300.01.T05  | Usp domain-containing protein                                             |
| maker-1-augustus-gene-36.40-mRNA-1  | NA | NA       |               | Os01g0170600 |                           | Usp domain-containing protein (Fragment)                                  |
| maker-1-augustus-gene-36.42-mRNA-1  | NA | NA       |               | Os01g0170700 | OsR498G0100237500.01.T01  |                                                                           |
| maker-1-augustus-gene-36.45-mRNA-1  | NA | NA       |               | 0            | OsR498G0100237900.01.T02  | Pentatricopeptide repeat-containing protein mitochondrial                 |
| maker-1-augustus-gene-36.46-mRNA-1  | NA | NA       |               | Os01g0169500 | OsR498G0100232800.01.T02  |                                                                           |
| maker-1-augustus-gene-36.50-mRNA-1  | NA | Indica   |               | Os05g0169300 | OsR498G0100233200.01.T01  | Tryptophan aminotransferase                                               |
| maker-1-augustus-gene-36.53-mRNA-1  | NA | NA       |               | Os01g0169900 | OsR498G0100234400.01.T01  | Class E vacuolar protein-sorting machinery protein HSE1-like              |
| maker-1-augustus-gene-36.55-mRNA-1  | NA | NA       |               | 0            | OsR498G0100235000.01.T02  | Galactinol--sucrose galactosyltransferase                                 |
| maker-1-augustus-gene-36.58-mRNA-1  | NA | NA       |               | Os01g0170500 | OsR498G0100236600.01.T01  | NEP-interacting protein 1                                                 |

|                                     |    |        |               |              |                          |                                                                               |
|-------------------------------------|----|--------|---------------|--------------|--------------------------|-------------------------------------------------------------------------------|
| maker-1-augustus-gene-363.0-mRNA-1  | NA | NA     |               | Os01g0831200 | OsR498G0102268500.01.T02 | BCL-2-associated athanogene 4                                                 |
| maker-1-augustus-gene-363.16-mRNA-1 | NA | Indica |               | Os01g0831900 | OsR498G0102268800.01.T01 | Ammonium transporter                                                          |
| maker-1-augustus-gene-365.3-mRNA-1  | NA | NA     |               | Os01g0835500 | OsR498G0102283700.01.T01 | Respiratory burst oxidase like protein H                                      |
| maker-1-augustus-gene-368.12-mRNA-1 | NA | NA     |               |              |                          | Homeobox domain-containing protein                                            |
| maker-1-augustus-gene-368.15-mRNA-1 | NA | NA     |               | Os01g0841200 | OsR498G0102308400.01.T02 | O-fucosyltransferase family protein (Fragment)                                |
| maker-1-augustus-gene-368.4-mRNA-1  | NA | NA     |               | 0            | OsR498G0102307700.01.T02 | ENTH domain-containing protein                                                |
| maker-1-augustus-gene-368.9-mRNA-1  | NA | NA     |               | Os01g0840700 | OsR498G0102306200.01.T01 | 60S ribosomal protein L36                                                     |
| maker-1-augustus-gene-369.0-mRNA-1  | NA | NA     |               | Os01g0841500 | OsR498G0102309500.01.T01 | Myb transcript factor 1                                                       |
| maker-1-augustus-gene-369.12-mRNA-1 | NA | Indica |               | Os01g0841800 | OsR498G0102310200.01.T01 | RNB domain-containing protein                                                 |
| maker-1-augustus-gene-369.19-mRNA-1 | NA | NA     |               | Os01g0842400 | OsR498G0102312600.01.T01 | Laccase                                                                       |
| maker-1-augustus-gene-369.21-mRNA-1 | NA | NA     |               | Os01g0842500 | OsR498G0102313000.01.T01 | Laccase                                                                       |
| maker-1-augustus-gene-369.26-mRNA-1 | NA | NA     |               | Os01g0842600 | OsR498G0102313400.01.T01 | Mitochondrial FTSH metalloprotease                                            |
| maker-1-augustus-gene-369.32-mRNA-1 | NA | NA     |               | 0            | OsR498G0102313600.01.T01 | WRKY transcription factor                                                     |
| maker-1-augustus-gene-369.4-mRNA-1  | NA | NA     |               | Os01g0841600 | OsR498G0102309700.01.T01 | Triose phosphate isomerase5                                                   |
| maker-1-augustus-gene-37.0-mRNA-1   | NA | NA     |               | 0            | OsR498G0100241300.01.T01 |                                                                               |
| maker-1-augustus-gene-37.10-mRNA-1  | NA | NA     |               | 0            | OsR498G1119934800.01.T01 |                                                                               |
| maker-1-augustus-gene-37.14-mRNA-1  | NA | NA     | Kinase-LRR-TM | 0            | OsR498G0100238400.01.T01 | Leucine-rich repeat receptor-like kinase                                      |
| maker-1-augustus-gene-37.16-mRNA-1  | NA | NA     |               | 0            | OsR498G0100238600.01.T02 | Ankyrin repeat and SOCS box-containing protein 14                             |
| maker-1-augustus-gene-37.2-mRNA-1   | NA | NA     |               | Os01g0172100 | OsR498G0100242100.01.T02 | Phosphoenolpyruvate/phosphate translocator 2 chloroplastic                    |
| maker-1-augustus-gene-37.22-mRNA-1  | NA | NA     |               | Os01g0171800 | OsR498G0100240600.01.T03 |                                                                               |
| maker-1-augustus-gene-37.26-mRNA-1  | NA | NA     |               | 0            | OsR498G0100241600.01.T02 | Putative dolichyl-phosphate-mannose--glycolipid alpha-mannosyltransferase     |
| maker-1-augustus-gene-37.6-mRNA-1   | NA | NA     |               | 0            | OsR498G0100242900.01.T04 | Peroxidase                                                                    |
| maker-1-augustus-gene-37.8-mRNA-1   | NA | NA     |               |              |                          | Polygalacturonase                                                             |
| maker-1-augustus-gene-370.38-mRNA-1 | NA | Indica |               | Os03g0810600 | OsR498G0102315900.01.T01 | Mitochondrial Rho GTPase                                                      |
| maker-1-augustus-gene-370.43-mRNA-1 | NA | Indica |               | Os01g0844050 | OsR498G0102317300.01.T01 | Laccase                                                                       |
| maker-1-augustus-gene-370.46-mRNA-1 | NA | NA     |               | Os01g0844300 | OsR498G0102318300.01.T05 | Peptidylprolyl isomerase                                                      |
| maker-1-augustus-gene-370.49-mRNA-1 | NA | NA     |               | Os01g0844800 | OsR498G0102321100.01.T02 | PUM-HD domain-containing protein                                              |
| maker-1-augustus-gene-370.55-mRNA-1 | NA | NA     |               | 0            | OsR498G0102315400.01.T01 |                                                                               |
| maker-1-augustus-gene-370.56-mRNA-1 | NA | NA     |               | Os01g0844400 | OsR498G0102318600.01.T04 | S-acyltransferase                                                             |
| maker-1-augustus-gene-371.0-mRNA-1  | NA | NA     |               | Os12g0539800 | OsR498G1221780600.01.T01 |                                                                               |
| maker-1-augustus-gene-371.12-mRNA-1 | NA | NA     |               | Os01g0846500 | OsR498G0102326300.01.T04 | PAP/25A-associated                                                            |
| maker-1-augustus-gene-371.22-mRNA-1 | NA | NA     |               | Os01g0847200 | OsR498G0102328500.01.T02 | Mannose-1-phosphate guanylyltransferase 1                                     |
| maker-1-augustus-gene-371.25-mRNA-1 | NA | Indica |               | Os01g0847700 | OsR498G0102329100.01.T03 | Ald-keto reductase family 4 member C-10 like                                  |
| maker-1-augustus-gene-371.28-mRNA-1 | NA | NA     |               | Os01g0847700 | OsR498G0102329500.01.T01 | Ald-keto reductase family 4 member C-10 like                                  |
| maker-1-augustus-gene-371.3-mRNA-1  | NA | NA     |               | Os01g0846300 | OsR498G0102325500.01.T01 | Protein-serine/threonine phosphatase                                          |
| maker-1-augustus-gene-371.32-mRNA-1 | NA | NA     |               | Os12g0540450 |                          |                                                                               |
| maker-1-augustus-gene-371.34-mRNA-1 | NA | Indica |               | Os03g0855700 | OsR498G0102324800.01.T02 | DUF223 domain-containing protein                                              |
| maker-1-augustus-gene-371.37-mRNA-1 | NA | Indica |               | Os01g0630700 | OsR498G1221780100.01.T02 | Putative transcription factor DP, helitron helicase-like domain-containing pr |
| maker-1-augustus-gene-371.41-mRNA-1 | NA | NA     |               | 0            | OsR498G1221780100.01.T05 |                                                                               |
| maker-1-augustus-gene-371.43-mRNA-1 | NA | NA     |               | Os01g0846600 | OsR498G0102327000.01.T02 | Methyltransferase                                                             |
| maker-1-augustus-gene-371.46-mRNA-1 | NA | Indica |               | Os01g0846900 | OsR498G0102328000.01.T03 | Transcription initiation factor TFIID                                         |
| maker-1-augustus-gene-371.50-mRNA-1 | NA | NA     |               | Os01g0847300 | OsR498G0102328800.01.T01 |                                                                               |
| maker-1-augustus-gene-371.6-mRNA-1  | NA | NA     |               |              |                          | Putative polynucleotide adenylyltransferase                                   |
| maker-1-augustus-gene-372.0-mRNA-1  | NA | Indica |               | Os05g0456300 | OsR498G0102329700.01.T02 | Aldo-keto reductase family 4 member C9                                        |
| maker-1-augustus-gene-372.11-mRNA-1 | NA | Indica |               | Os01g0848900 | OsR498G0102334700.01.T01 | Hypothetcal protein                                                           |
| maker-1-augustus-gene-372.16-mRNA-1 | NA | NA     |               | Os01g0847900 | OsR498G0102330000.01.T02 |                                                                               |
| maker-1-augustus-gene-372.18-mRNA-1 | NA | NA     |               | Os01g0848400 | OsR498G0102332000.01.T01 | BEL1-like homeodomain protein 8                                               |
| maker-1-augustus-gene-372.22-mRNA-1 | NA | NA     |               | Os01g0848700 | OsR498G0102333600.01.T01 | Ras-related protein like                                                      |
| maker-1-augustus-gene-372.24-mRNA-1 | NA | NA     |               | Os01g0849100 | OsR498G0102335200.01.T01 | PRONE domain-containing protein (Fragment)                                    |
| maker-1-augustus-gene-372.26-mRNA-1 | NA | NA     |               | Os01g0849600 | OsR498G0102335800.01.T01 | Usp domain-containing protein                                                 |
| maker-1-augustus-gene-372.4-mRNA-1  | NA | NA     |               | Os01g0848200 | OsR498G0102331100.01.T02 | Delta-1-pyrroline-5-carboxylate synthase                                      |
| maker-1-augustus-gene-373.0-mRNA-1  | NA | NA     |               | Os01g0850000 | OsR498G0102338100.01.T02 |                                                                               |
| maker-1-augustus-gene-373.10-mRNA-1 | NA | Indica |               | Os12g0259800 | OsR498G0102339900.01.T01 | Laccase                                                                       |
| maker-1-augustus-gene-373.13-mRNA-1 | NA | NA     |               | Os01g0850700 | OsR498G0102340300.01.T01 | Laccase                                                                       |
| maker-1-augustus-gene-373.15-mRNA-1 | NA | NA     |               | Os01g0850800 | OsR498G0102340700.01.T01 | Laccase                                                                       |
| maker-1-augustus-gene-373.17-mRNA-1 | NA | NA     |               | Os01g0851000 | OsR498G0102341500.01.T03 | Fructokinase-like protein 1, chloroplastic                                    |
| maker-1-augustus-gene-373.19-mRNA-1 | NA | NA     |               | Os01g0850400 | OsR498G0102339600.01.T01 | Myb-like protein B                                                            |
| maker-1-augustus-gene-373.21-mRNA-1 | NA | NA     |               | 0            | OsR498G0102341800.01.T01 | O-fucosyltransferase family protein (Fragment)                                |
| maker-1-augustus-gene-373.3-mRNA-1  | NA | NA     |               | Os01g0850100 | OsR498G0102338900.01.T06 | Sphingomyelin synthase-like domain containing protein                         |
| maker-1-augustus-gene-374.33-mRNA-1 | NA | NA     |               | Os01g0853400 | OsR498G0102350700.01.T02 | Coronatine-insensitive protein homolog 1b                                     |
| maker-1-augustus-gene-374.37-mRNA-1 | NA | NA     |               | Os01g0851300 | OsR498G0102343200.01.T02 | Reticulon domain-containing protein                                           |

|                                     |    |          |           |              |                          |                                                                             |
|-------------------------------------|----|----------|-----------|--------------|--------------------------|-----------------------------------------------------------------------------|
| maker-1-augustus-gene-374.40-mRNA-1 | NA | NA       |           | Os01g0851400 | OsR498G0102343400.01.T01 | Ubiquitinyl hydrolase 1                                                     |
| maker-1-augustus-gene-374.42-mRNA-1 | NA | NA       |           | Os01g0851700 | OsR498G0102345000.01.T01 | Alpha-1,4 glucan phosphorylase                                              |
| maker-1-augustus-gene-374.48-mRNA-1 | NA | Indica   | Kinase-TM | Os03g0825800 | OsR498G0102345600.01.T02 | Serine/threonine protein kinase                                             |
| maker-1-augustus-gene-374.52-mRNA-1 | NA | Indica   |           | Os01g0852200 | OsR498G0102346000.01.T01 | Anion transporter 4 like                                                    |
| maker-1-augustus-gene-374.57-mRNA-1 | NA | Indica   |           | Os01g0852500 | OsR498G0102348400.01.T03 | ELM2 domain-containing protein                                              |
| maker-1-augustus-gene-374.60-mRNA-1 | NA | NA       |           | Os01g0853000 | OsR498G0102349200.01.T01 | Putative pentatricopeptide repeat-containing protein                        |
| maker-1-augustus-gene-375.0-mRNA-1  | NA | NA       |           | Os01g0854400 | OsR498G0102355900.01.T01 |                                                                             |
| maker-1-augustus-gene-375.1-mRNA-1  | NA | NA       |           | Os01g0853700 | OsR498G0102352200.01.T01 | Transcription factor DIVARICATA                                             |
| maker-1-augustus-gene-375.3-mRNA-1  | NA | NA       |           | Os01g0854500 | OsR498G0102356600.01.T01 | Homeobox domain containing protein, expressed                               |
| maker-1-augustus-gene-375.5-mRNA-1  | NA | NA       |           | Os01g0855000 | OsR498G0102357800.01.T01 | Glycerol-3-phosphate 2-O-acyltransferase 6                                  |
| maker-1-augustus-gene-376.22-mRNA-1 | NA | NA       |           | Os01g0855200 | OsR498G0102360100.01.T01 | Tetratricopeptide repeat (TPR)-like superfamily protein                     |
| maker-1-augustus-gene-376.24-mRNA-1 | NA | NA       |           | Os01g0855400 | OsR498G0102361100.01.T01 | Myb proto-oncogene protein-like                                             |
| maker-1-augustus-gene-376.26-mRNA-1 | NA | NA       |           | Os01g0856000 | OsR498G0102362900.01.T03 | Cell division control protein 6 homolog B                                   |
| maker-1-augustus-gene-376.29-mRNA-1 | NA | NA       |           | Os01g0856500 | OsR498G0102366700.01.T01 | Auxin transporter-like protein 4 isoform A                                  |
| maker-1-augustus-gene-377.33-mRNA-1 | NA | NA       |           | Os01g0856900 | OsR498G0102367900.01.T01 | Alpha-amylase                                                               |
| maker-1-augustus-gene-377.35-mRNA-1 | NA | NA       |           | 0            | OsR498G0102369300.01.T02 | Nucleobase-ascorbate transporter like                                       |
| maker-1-augustus-gene-377.41-mRNA-1 | NA | NA       |           | 0            | OsR498G0203524100.01.T01 | DNA excision repair protein like                                            |
| maker-1-augustus-gene-377.50-mRNA-1 | NA | NA       |           | 0            | OsR498G0102367000.01.T02 | Nuclear pore complex protein NUP62                                          |
| maker-1-augustus-gene-377.56-mRNA-1 | NA | NA       |           | Os01g0857000 | OsR498G0102368200.01.T03 | Protein-serine/threonine phosphatase                                        |
| maker-1-augustus-gene-377.61-mRNA-1 | NA | NA       |           | Os01g0857200 | OsR498G0102368400.01.T02 | Alkyl transferase                                                           |
| maker-1-augustus-gene-377.63-mRNA-1 | NA | NA       |           | 0            | OsR498G0102368600.01.T01 | probable 3-deoxy-D-manno-octulosonic acid transferase, mitochondrial        |
| maker-1-augustus-gene-377.69-mRNA-1 | NA | NA       |           | Os01g0857400 | OsR498G0102368800.01.T01 | GABA transporter 1                                                          |
| maker-1-augustus-gene-377.72-mRNA-1 | NA | Indica   |           | Os01g0857600 | OsR498G0102369600.01.T01 |                                                                             |
| maker-1-augustus-gene-377.75-mRNA-1 | NA | NA       |           | Os01g0858000 | OsR498G0102370200.01.T01 | AT hook motif-containing protein-like                                       |
| maker-1-augustus-gene-378.32-mRNA-1 | NA | NA       |           | Os01g0858700 | OsR498G0102372900.01.T01 | Nuclear transcription factor Y subunit alpha like                           |
| maker-1-augustus-gene-378.34-mRNA-1 | NA | NA       |           | Os01g0859200 | OsR498G0102374900.01.T05 | AB hydrolase-1 domain-containing protein                                    |
| maker-1-augustus-gene-378.37-mRNA-1 | NA | Indica   |           | Os01g0859300 | OsR498G0102377300.01.T01 | Absciscic acid insensitive 5 homologue                                      |
| maker-1-augustus-gene-378.39-mRNA-1 | NA | NA       |           | Os01g0859400 | OsR498G0102377500.01.T01 | Dual specificity protein phosphatase Diacylglycerol kinase catalytic region |
| maker-1-augustus-gene-378.47-mRNA-1 | NA | NA       |           | Os01g0859100 |                          | Zinc finger protein WIP5                                                    |
| maker-1-augustus-gene-379.50-mRNA-1 | NA | NA       |           | Os01g0860400 | OsR498G0102379300.01.T01 | Acidic endochitinase                                                        |
| maker-1-augustus-gene-379.55-mRNA-1 | NA | NA       |           | Os01g0861400 | OsR498G010048900.01.T01  |                                                                             |
| maker-1-augustus-gene-379.57-mRNA-1 | NA | NA       |           | Os01g0861700 | OsR498G0102383100.01.T01 | Hemerythrin domain-containing protein (Fragment)                            |
| maker-1-augustus-gene-379.60-mRNA-1 | NA | NA       |           | Os01g0862200 | OsR498G0102383900.01.T01 | Myb domain protein 3r-3                                                     |
| maker-1-augustus-gene-379.62-mRNA-1 | NA | NA       |           | Os01g0862800 | OsR498G0102385500.01.T01 | NAC domain-containing protein 90                                            |
| maker-1-augustus-gene-379.64-mRNA-1 | NA | NA       |           | 0            | OsR498G0102386100.01.T01 |                                                                             |
| maker-1-augustus-gene-379.65-mRNA-1 | NA | NA       |           | Os01g0861900 | OsR498G0102383600.01.T01 | Transposon protein Mutator sub-class                                        |
| maker-1-augustus-gene-379.67-mRNA-1 | NA | Indica   |           | Os01g0862000 | OsR498G0102383800.01.T04 | AB hydrolase-1 domain-containing protein (Fragment)                         |
| maker-1-augustus-gene-379.72-mRNA-1 | NA | NA       |           | Os01g0862300 | OsR498G0102384200.01.T01 | Sorting nexin-1                                                             |
| maker-1-augustus-gene-38.38-mRNA-1  | NA | NA       |           | Os01g0174900 | OsR498G0100249700.01.T02 | Monothiol glutaredoxin                                                      |
| maker-1-augustus-gene-38.48-mRNA-1  | NA | NA       |           | Os01g0174500 | OsR498G0100248600.01.T01 | Procollagen-proline 4-dioxygenase                                           |
| maker-1-augustus-gene-38.52-mRNA-1  | NA | NA       |           | Os01g0174600 | OsR498G0100248800.01.T01 | Zinc finger CCCH domain-containing protein 1                                |
| maker-1-augustus-gene-380.0-mRNA-1  | NA | Indica   |           | Os05g0442400 | OsR498G0102387900.01.T01 | Transcription factor DIVARICATA                                             |
| maker-1-augustus-gene-380.3-mRNA-1  | NA | NA       |           | Os01g0863400 | OsR498G0102388200.01.T01 |                                                                             |
| maker-1-augustus-gene-380.5-mRNA-1  | NA | Indica   |           | Os01g0864000 | OsR498G0102390000.01.T01 | Transcription repressor                                                     |
| maker-1-augustus-gene-381.0-mRNA-1  | NA | NA       |           | Os01g0865600 | OsR498G0102396300.01.T01 | Transcription factor LHW like                                               |
| maker-1-augustus-gene-381.12-mRNA-1 | NA | NA       |           | Os01g0866400 | OsR498G0102400900.01.T01 | D-fructose-1,6-bisphosphate 1-phosphohydrolase                              |
| maker-1-augustus-gene-381.17-mRNA-1 | NA | NA       | Kinase    | 0            | OsR498G0102391800.01.T03 | Serine/threonine-protein kinase Nek5                                        |
| maker-1-augustus-gene-381.23-mRNA-1 | NA | NA       |           | Os01g0865100 | OsR498G0102395000.01.T01 | Uricase                                                                     |
| maker-1-augustus-gene-381.29-mRNA-1 | NA | NA       |           | Os01g0866500 | OsR498G0102401200.01.T02 | Inorganic diphosphatase                                                     |
| maker-1-augustus-gene-381.32-mRNA-1 | NA | NA       |           | Os01g0866600 | OsR498G0102401600.01.T01 | Sm domain-containing protein                                                |
| maker-1-augustus-gene-381.34-mRNA-1 | NA | NA       |           | Os01g0866700 | OsR498G0102401800.01.T01 | U6 snRNA-associated Sm-like protein LSM3                                    |
| maker-1-augustus-gene-381.5-mRNA-1  | NA | Indica   |           | Os05g0438800 | OsR498G0102400100.01.T02 | Actin-7                                                                     |
| maker-1-augustus-gene-381.7-mRNA-1  | NA | NA       |           | Os01g0866300 | OsR498G0102400700.01.T04 | SNARE protein YKT6, synaptobrevin/VAMP syperfamily                          |
| maker-1-augustus-gene-382.0-mRNA-1  | NA | NA       |           | Os01g0866800 | OsR498G0102403100.01.T05 | Tubby-like F-box protein 14                                                 |
| maker-1-augustus-gene-382.14-mRNA-1 | NA | NA       |           | Os01g0867600 | OsR498G0102404900.01.T01 | Sterol 3-beta-glucosyltransferase                                           |
| maker-1-augustus-gene-382.21-mRNA-1 | NA | NA       |           | Os01g0867700 | OsR498G0102405100.01.T01 |                                                                             |
| maker-1-augustus-gene-382.23-mRNA-1 | NA | NA       |           | Os01g0867800 | OsR498G0102405300.01.T10 | Polypyrimidine tract-binding protein like 3                                 |
| maker-1-augustus-gene-382.28-mRNA-1 | NA | NA       |           | Os01g0867300 | OsR498G0102404000.01.T03 | G-box-binding factor 4                                                      |
| maker-1-augustus-gene-382.32-mRNA-1 | NA | NA       |           | Os01g0867900 | OsR498G0102405600.01.T01 | Membrane protein COV-like                                                   |
| maker-1-augustus-gene-382.36-mRNA-1 | NA | Japonica |           | Os01g0868000 | OsR498G0102406000.01.T01 | Ethylene-responsive transcription factor                                    |
| maker-1-augustus-gene-382.6-mRNA-1  | NA | Indica   |           | Os07g0675400 | OsR498G0102403500.01.T04 | Tyrosyl-tRNA synthetase                                                     |

|                                     |    |          |           |              |                          |                                                                               |
|-------------------------------------|----|----------|-----------|--------------|--------------------------|-------------------------------------------------------------------------------|
| maker-1-augustus-gene-382.9-mRNA-1  | NA | NA       |           | Os01g0867200 | OsR498G0102403700.01.T03 | Putative wd repeat-containing protein-like                                    |
| maker-1-augustus-gene-383.0-mRNA-1  | NA | NA       |           | 0            | OsR498G0102408700.01.T01 | Peptidase A1 domain-containing protein                                        |
| maker-1-augustus-gene-383.1-mRNA-1  | NA | NA       |           | Os01g0869200 | OsR498G0102410700.01.T01 | Magnesium transporter                                                         |
| maker-1-augustus-gene-383.16-mRNA-1 | NA | NA       |           |              |                          | S-acyltransferase                                                             |
| maker-1-augustus-gene-383.21-mRNA-1 | NA | NA       |           |              |                          | DNA polymerase alpha catalytic subunit                                        |
| maker-1-augustus-gene-383.27-mRNA-1 | NA | NA       |           | Os01g0869000 | OsR498G0102410200.01.T01 |                                                                               |
| maker-1-augustus-gene-383.3-mRNA-1  | NA | NA       |           | Os01g0869600 | OsR498G0102412100.01.T01 | TLC domain-containing protein 2                                               |
| maker-1-augustus-gene-383.32-mRNA-1 | NA | Indica   |           | Os07g0232900 | OsR498G0102410400.01.T01 | Cadmium/zinc-transporting ATPase HMA2                                         |
| maker-1-augustus-gene-383.34-mRNA-1 | NA | NA       |           |              |                          |                                                                               |
| maker-1-augustus-gene-383.39-mRNA-1 | NA | NA       |           | Os01g0869500 | OsR498G0102412000.01.T01 | AUGMIN subunit like                                                           |
| maker-1-augustus-gene-383.43-mRNA-1 | NA | NA       |           | Os01g0870100 | OsR498G0102414000.01.T01 | Ion channel POLLUX like                                                       |
| maker-1-augustus-gene-383.6-mRNA-1  | NA | NA       |           | Os01g0869800 | OsR498G0102412300.01.T01 | Photosystem II protein, chloroplastic                                         |
| maker-1-augustus-gene-384.0-mRNA-1  | NA | Indica   |           | Os02g0688900 | OsR498G0102414300.01.T01 | Phosphatidylinositol glycan anchor biosynthesis class U protein               |
| maker-1-augustus-gene-384.10-mRNA-1 | NA | NA       |           |              |                          | AB hydrolase-1 domain-containing protein (Fragment)                           |
| maker-1-augustus-gene-384.17-mRNA-1 | NA | NA       |           | Os01g0871300 | OsR498G0102417100.01.T01 | Glutamate-oxaloacetate transaminase4                                          |
| maker-1-augustus-gene-384.21-mRNA-1 | NA | NA       |           | Os01g0871500 | OsR498G0102418100.01.T03 | Peptide/nitrate transporter                                                   |
| maker-1-augustus-gene-384.25-mRNA-1 | NA | NA       |           | Os01g0871600 | OsR498G0102418700.01.T01 | Peptide/nitrate transporter                                                   |
| maker-1-augustus-gene-384.28-mRNA-1 | NA | Indica   |           | Os01g0872100 | OsR498G0102418900.01.T01 | Peptide transporter PTR2                                                      |
| maker-1-augustus-gene-384.30-mRNA-1 | NA | NA       |           | Os01g0871800 | OsR498G0102419100.01.T01 | CRIB domain-containing protein                                                |
| maker-1-augustus-gene-384.32-mRNA-1 | NA | Japonica |           | Os01g0871900 | OsR498G0102420300.01.T02 | Peptide transporter PTR5                                                      |
| maker-1-augustus-gene-384.34-mRNA-1 | NA | Indica   | Kinase-TM | Os01g0889900 | OsR498G0102414800.01.T01 | Receptor-like serine/threonine-protein kinase                                 |
| maker-1-augustus-gene-384.35-mRNA-1 | NA | NA       | Kinase-TM | 0            | OsR498G0102415600.01.T01 | Non-specific serine/threonine protein kinase (Fragment)                       |
| maker-1-augustus-gene-384.6-mRNA-1  | NA | NA       |           | 0            | OsR498G0102414500.01.T04 | DNA repair protein XRCC                                                       |
| maker-1-augustus-gene-384.8-mRNA-1  | NA | NA       |           | Os01g0870300 | OsR498G0102414500.01.T06 | Ammonium transporter                                                          |
| maker-1-augustus-gene-385.1-mRNA-1  | NA | NA       |           | Os01g0872100 | OsR498G0102420300.01.T02 | Peptide transporter PTR5                                                      |
| maker-1-augustus-gene-385.11-mRNA-1 | NA | NA       |           | 0            | OsR498G0102421700.01.T01 | CRIB domain-containing protein                                                |
| maker-1-augustus-gene-385.14-mRNA-1 | NA | NA       |           | 0            | OsR498G0102422100.01.T01 | ROP-interactive CRIB motif-containing protein 10                              |
| maker-1-augustus-gene-385.21-mRNA-1 | NA | NA       |           | Os01g0872700 | OsR498G0102422400.01.T01 | 5'-3' exoribonuclease                                                         |
| maker-1-augustus-gene-385.27-mRNA-1 | NA | NA       | Kinase    | Os01g0872800 | OsR498G0102422600.01.T01 | Non-specific serine/threonine protein kinase                                  |
| maker-1-augustus-gene-385.34-mRNA-1 | NA | NA       |           | Os01g0873800 | OsR498G0102425600.01.T01 | Erythroid differentiation-related factor 1                                    |
| maker-1-augustus-gene-385.38-mRNA-1 | NA | Indica   |           | Os05g0430300 | OsR498G0102426200.01.T01 | Zinc finger protein Pegasus                                                   |
| maker-1-augustus-gene-385.4-mRNA-1  | NA | Indica   |           | Os01g0871800 | OsR498G0102420700.01.T01 | Peptide transporter PTR2                                                      |
| maker-1-augustus-gene-385.6-mRNA-1  | NA | Indica   |           | Os01g0872000 | OsR498G0102420900.01.T01 | Putative proton-dependent oligopeptide or low-affinity nitrate transporter (  |
| maker-1-augustus-gene-386.0-mRNA-1  | NA | NA       |           | Os01g0874300 | OsR498G0102429100.01.T01 | Transcription repressor MYB4                                                  |
| maker-1-augustus-gene-386.12-mRNA-1 | NA | NA       |           |              |                          | SUEL-type lectin domain-containing protein                                    |
| maker-1-augustus-gene-386.17-mRNA-1 | NA | Indica   |           | Os01g0874100 | OsR498G0102428000.01.T01 | dNK domain-containing protein (Fragment)                                      |
| maker-1-augustus-gene-386.2-mRNA-1  | NA | NA       |           | Os01g0874700 | OsR498G0102431700.01.T01 | SEC14 cytosolic factor family protein / phosphoglyceride transfer family prot |
| maker-1-augustus-gene-386.20-mRNA-1 | NA | NA       |           | Os01g0874800 | OsR498G0102432600.01.T02 | 53EXOc domain-containing protein (Fragment)                                   |
| maker-1-augustus-gene-386.22-mRNA-1 | NA | NA       |           | Os01g0875000 | OsR498G0102433600.01.T01 | Transposable element protein, putative, MuDR                                  |
| maker-1-augustus-gene-386.24-mRNA-1 | NA | NA       |           | Os01g0875400 | OsR498G0102436000.01.T02 | Nuclear proteasome inhibitor UBLCP1                                           |
| maker-1-augustus-gene-386.5-mRNA-1  | NA | NA       |           | Os01g0874900 | OsR498G0102433100.01.T01 | Glycine hydroxymethyltransferase                                              |
| maker-1-augustus-gene-386.8-mRNA-1  | NA | NA       |           | Os01g0875300 | OsR498G0102435700.01.T01 | Usp domain-containing protein (Fragment)                                      |
| maker-1-augustus-gene-387.0-mRNA-1  | NA | NA       |           | Os01g0875700 | OsR498G0102437500.01.T01 | J domain-containing protein (Fragment)                                        |
| maker-1-augustus-gene-387.13-mRNA-1 | NA | NA       |           | Os01g0877400 | OsR498G0102441900.01.T01 | Hexosyltransferase                                                            |
| maker-1-augustus-gene-387.16-mRNA-1 | NA | NA       |           | Os01g0877500 | OsR498G0102442700.01.T01 | PHD domain-containing protein                                                 |
| maker-1-augustus-gene-387.19-mRNA-1 | NA | NA       |           | Os01g0875800 | OsR498G0102437800.01.T01 | Peroxioredoxin-5, mitochondrial                                               |
| maker-1-augustus-gene-387.2-mRNA-1  | NA | Indica   |           | Os08g0300300 | OsR498G0102438100.01.T01 | Chloride channel protein CLC-c                                                |
| maker-1-augustus-gene-387.21-mRNA-1 | NA | NA       |           | Os01g0876400 | OsR498G0102439000.01.T01 | Galactose-binding protein isoform 1                                           |
| maker-1-augustus-gene-387.25-mRNA-1 | NA | NA       |           | Os01g0876900 | OsR498G0102441200.01.T02 | SnRK1-interacting protein 1                                                   |
| maker-1-augustus-gene-387.4-mRNA-1  | NA | Japonica |           | Os01g0876500 | OsR498G0102439100.01.T04 | Splicing factor U2af large subunit A                                          |
| maker-1-augustus-gene-387.9-mRNA-1  | NA | NA       |           | Os01g0877300 | OsR498G0102441700.01.T01 | Mitotic spindle assembly checkpoint protein MAD1                              |
| maker-1-augustus-gene-388.46-mRNA-1 | NA | NA       |           | 0            | OsR498G0102449300.01.T01 | Fidgetin-like protein 1                                                       |
| maker-1-augustus-gene-388.48-mRNA-1 | NA | NA       |           | Os01g0878000 | OsR498G0102444800.01.T02 | Protein GLUTAMINE DUMPER like                                                 |
| maker-1-augustus-gene-388.50-mRNA-1 | NA | NA       |           | Os01g0878400 | OsR498G0102446400.01.T01 | Amino acid transporter                                                        |
| maker-1-augustus-gene-388.52-mRNA-1 | NA | NA       |           | Os01g0878700 | OsR498G0102447200.01.T02 | Amino acid transporter                                                        |
| maker-1-augustus-gene-388.54-mRNA-1 | NA | NA       |           | Os01g0878800 | OsR498G0102447400.01.T01 | LigB domain-containing protein (Fragment)                                     |
| maker-1-augustus-gene-388.56-mRNA-1 | NA | NA       |           | Os01g0878900 | OsR498G0102447600.01.T02 | LigB domain-containing protein (Fragment)                                     |
| maker-1-augustus-gene-388.58-mRNA-1 | NA | NA       |           | 0            | OsR498G0102448800.01.T01 | N-lysine methyltransferase                                                    |
| maker-1-augustus-gene-389.0-mRNA-1  | NA | NA       |           | Os01g0880200 | OsR498G0102453500.01.T01 | Hexosyltransferase                                                            |
| maker-1-augustus-gene-389.13-mRNA-1 | NA | NA       |           | Os01g0880300 | OsR498G0102454200.01.T01 | Pectinesterase                                                                |
| maker-1-augustus-gene-389.15-mRNA-1 | NA | NA       |           | Os01g0880400 | OsR498G0102454400.01.T03 | Protein trichome birefringence-like 7                                         |

|                                     |    |          |           |              |                          |                                                                      |
|-------------------------------------|----|----------|-----------|--------------|--------------------------|----------------------------------------------------------------------|
| maker-1-augustus-gene-389.18-mRNA-1 | NA | NA       |           | Os01g0881000 | OsR498G0102455200.01.T01 | CHD3-type chromatin-remodeling factor PICKLE                         |
| maker-1-augustus-gene-389.20-mRNA-1 | NA | NA       |           | Os01g0881500 | OsR498G0102459000.01.T01 | Scarecrow-like protein 1                                             |
| maker-1-augustus-gene-389.3-mRNA-1  | NA | NA       |           | Os01g0880800 | OsR498G0102454900.01.T01 | Stearoyl-[acyl-carrier-protein] 9-desaturase 1, chloroplastic        |
| maker-1-augustus-gene-389.5-mRNA-1  | NA | NA       |           | Os01g0881300 | OsR498G0102458300.01.T01 | Bidirectional sugar transporter SWEET                                |
| maker-1-augustus-gene-39.0-mRNA-1   | NA | Indica   |           | Os01g0175300 | OsR498G0510826100.01.T01 | ATP-dependent DNA helicase                                           |
| maker-1-augustus-gene-39.15-mRNA-1  | NA | NA       |           | Os01g0175200 |                          | Ankyrin-3                                                            |
| maker-1-augustus-gene-39.47-mRNA-1  | NA | NA       |           | Os01g0176500 | OsR498G0100254600.01.T01 | Myosin-10 like                                                       |
| maker-1-augustus-gene-390.0-mRNA-1  | NA | Indica   |           | Os01g0882100 | OsR498G0102460500.01.T01 | 4HBT domain-containing protein (Fragment)                            |
| maker-1-augustus-gene-390.15-mRNA-1 | NA | NA       |           | Os01g0883800 | OsR498G0102466500.01.T01 | Gibberellin 20 oxidase 2                                             |
| maker-1-augustus-gene-390.17-mRNA-1 | NA | NA       |           | Os01g0881900 | OsR498G0102460200.01.T04 | F-box protein SKP2A                                                  |
| maker-1-augustus-gene-390.20-mRNA-1 | NA | NA       | Kinase-TM | 0            | OsR498G0102460400.01.T03 | probable serine/threonine-protein kinase PBL16                       |
| maker-1-augustus-gene-390.24-mRNA-1 | NA | NA       |           | Os06g0265400 | OsR498G0612061600.01.T03 | Basic-leucine zipper domain                                          |
| maker-1-augustus-gene-390.26-mRNA-1 | NA | NA       |           | Os01g0882500 | OsR498G0102462400.01.T01 | NADH dehydrogenase I subunit N                                       |
| maker-1-augustus-gene-390.28-mRNA-1 | NA | NA       |           | Os01g0882800 | OsR498G0102462800.01.T01 | Amino acid permease                                                  |
| maker-1-augustus-gene-390.3-mRNA-1  | NA | NA       |           | Os01g0882300 | OsR498G0102462100.01.T03 | Probable magnesium transporter                                       |
| maker-1-augustus-gene-390.30-mRNA-1 | NA | Japonica |           | Os01g0883100 | OsR498G0102463400.01.T04 | MADS-box transcription factor 2                                      |
| maker-1-augustus-gene-390.8-mRNA-1  | NA | NA       |           | 0            | OsR498G0102463900.01.T01 | HUN domain-containing protein                                        |
| maker-1-augustus-gene-391.0-mRNA-1  | NA | NA       |           | Os01g0884400 | OsR498G0102469100.01.T01 | RING-type E3 ubiquitin transferase                                   |
| maker-1-augustus-gene-391.11-mRNA-1 | NA | NA       |           | Os01g0884300 | OsR498G0102467600.01.T01 | NAC transcription factor                                             |
| maker-1-augustus-gene-391.14-mRNA-1 | NA | NA       |           | Os01g0884500 | OsR498G0102469400.01.T04 | Plus3 domain-containing protein                                      |
| maker-1-augustus-gene-391.20-mRNA-1 | NA | NA       |           | Os01g0884700 | OsR498G0102470200.01.T01 | Plus3 domain-containing protein                                      |
| maker-1-augustus-gene-391.23-mRNA-1 | NA | NA       |           | 0            | OsR498G0102470400.01.T02 | TVP38/TMEM64 family membrane protein like                            |
| maker-1-augustus-gene-391.26-mRNA-1 | NA | NA       |           | Os01g0885300 | OsR498G0102472000.01.T04 | Serine/arginine repetitive matrix protein 1-like isoform X2          |
| maker-1-augustus-gene-391.29-mRNA-1 | NA | NA       |           | 0            | OsR498G0102473200.01.T04 | SMAP domain-containing protein                                       |
| maker-1-augustus-gene-391.3-mRNA-1  | NA | Indica   |           | Os01g0885000 | OsR498G0102470900.01.T02 | Cytochrome c, class IA/ IB                                           |
| maker-1-augustus-gene-391.6-mRNA-1  | NA | NA       |           | Os01g0883900 | OsR498G0102466800.01.T02 | Putative methyltransferase PMT25                                     |
| maker-1-augustus-gene-392.41-mRNA-1 | NA | Japonica |           | Os01g0886200 | OsR498G0102475700.01.T01 | AGAMOUS-like protein 2                                               |
| maker-1-augustus-gene-392.45-mRNA-1 | NA | NA       |           | Os01g0886300 | OsR498G0102477100.01.T07 | RNA-binding KH domain-containing protein isoform 1                   |
| maker-1-augustus-gene-392.49-mRNA-1 | NA | Indica   |           | Os05g0419200 | OsR498G0102478500.01.T01 | Protein root UVB sensitive 6                                         |
| maker-1-augustus-gene-392.54-mRNA-1 | NA | NA       |           | 0            | OsR498G0102478700.01.T01 | 4-diphosphocytidyl-2C-methyl-D-erythritol synthase                   |
| maker-1-augustus-gene-392.60-mRNA-1 | NA | NA       |           | Os01g0886000 | OsR498G0102475000.01.T01 | Electron transporter                                                 |
| maker-1-augustus-gene-392.62-mRNA-1 | NA | NA       |           | Os03g0615700 | OsR498G0613178300.01.T01 | GRF zinc finger family protein, expressed                            |
| maker-1-augustus-gene-392.64-mRNA-1 | NA | NA       |           | Os01g0886500 | OsR498G0102477400.01.T04 | keratin, type II cytoskeletal 3                                      |
| maker-1-augustus-gene-392.66-mRNA-1 | NA | Indica   |           | Os01g0886600 | OsR498G0102477600.01.T01 | AAA+ ATPase domain                                                   |
| maker-1-augustus-gene-392.72-mRNA-1 | NA | NA       |           | 0            | OsR498G0102479000.01.T01 | Class I peptide chain release factor                                 |
| maker-1-augustus-gene-392.75-mRNA-1 | NA | NA       |           | Os01g0887700 | OsR498G0102480200.01.T01 | PHD finger protein ALFIN-LIKE 6                                      |
| maker-1-augustus-gene-393-mRNA-1    | NA | NA       |           |              |                          |                                                                      |
| maker-1-augustus-gene-393.41-mRNA-1 | NA | NA       |           | Os01g0888300 | OsR498G0102483900.01.T01 | NAC transcription factor                                             |
| maker-1-augustus-gene-393.43-mRNA-1 | NA | NA       |           | Os01g0888600 | OsR498G0102485100.01.T01 |                                                                      |
| maker-1-augustus-gene-393.46-mRNA-1 | NA | NA       |           | Os01g0889000 | OsR498G0102486500.01.T01 | Signal recognition particle subunit SRP72                            |
| maker-1-augustus-gene-393.52-mRNA-1 | NA | NA       |           | Os01g0888700 | OsR498G0102485400.01.T01 | Non-specific serine/threonine protein kinase                         |
| maker-1-augustus-gene-393.58-mRNA-1 | NA | NA       |           | Os01g0889200 | OsR498G0102487400.01.T06 | DNA-directed RNA polymerase III subunit rpc4-like                    |
| maker-1-augustus-gene-394-mRNA-1    | NA | NA       |           |              |                          |                                                                      |
| maker-1-augustus-gene-394.0-mRNA-1  | NA | Indica   | Kinase-TM | Os01g0890600 | OsR498G0102489700.01.T01 | Non-specific serine/threonine protein kinase (Fragment)              |
| maker-1-augustus-gene-394.10-mRNA-1 | NA | NA       |           | Os01g0891300 | OsR498G0102492500.01.T01 | NADPH-dependent double-bond reductase 3 variant 1                    |
| maker-1-augustus-gene-394.17-mRNA-1 | NA | NA       |           | Os01g0889800 | OsR498G0102488600.01.T02 | rhodanese-like domain-containing protein 4A, chloroplastic           |
| maker-1-augustus-gene-394.19-mRNA-1 | NA | NA       | Kinase-TM | Os01g0889900 | OsR498G0102488800.01.T01 | Receptor-like serine/threonine-protein kinase                        |
| maker-1-augustus-gene-394.2-mRNA-1  | NA | NA       |           | 0            | OsR498G0102490500.01.T01 | Receptor-like serine/threonine-protein kinase                        |
| maker-1-augustus-gene-394.21-mRNA-1 | NA | NA       |           |              |                          |                                                                      |
| maker-1-augustus-gene-394.23-mRNA-1 | NA | NA       |           | Os01g0890300 |                          | DDE Tnp4 domain-containing protein                                   |
| maker-1-augustus-gene-394.25-mRNA-1 | NA | NA       |           | Os01g0891000 | OsR498G0102491600.01.T02 | Beta-N-acetylhexosaminidase                                          |
| maker-1-augustus-gene-394.3-mRNA-1  | NA | Indica   | Kinase-TM | Os01g0890600 | OsR498G0102491100.01.T02 | Receptor-like serine/threonine-protein kinase                        |
| maker-1-augustus-gene-394.30-mRNA-1 | NA | NA       |           | Os01g0661400 | OsR498G0102492800.01.T03 | Ribosomal RNA-processing protein 40                                  |
| maker-1-augustus-gene-394.5-mRNA-1  | NA | NA       |           | 0            | OsR498G0102491300.01.T03 | TPR repeat-containing protein ZIP4                                   |
| maker-1-augustus-gene-394.9-mRNA-1  | NA | NA       |           | Os01g0891100 | OsR498G0102492100.01.T01 | Endo-polygalacturonase                                               |
| maker-1-augustus-gene-395.11-mRNA-1 | NA | NA       |           | Os09g0258800 |                          | Ulp1 protease family, C-terminal catalytic domain containing protein |
| maker-1-augustus-gene-395.13-mRNA-1 | NA | NA       |           | Os01g0893400 | OsR498G0102500100.01.T01 | Btbpoz and taz domain-containing protein 3                           |
| maker-1-augustus-gene-395.17-mRNA-1 | NA | Indica   |           | Os01g0892600 | OsR498G0102496800.01.T01 | Pectin acetyltransferase                                             |
| maker-1-augustus-gene-395.22-mRNA-1 | NA | Indica   |           | Os01g0892600 | OsR498G0102497400.01.T01 | Pectin acetyltransferase                                             |
| maker-1-augustus-gene-395.27-mRNA-1 | NA | NA       |           | Os01g0892600 | OsR498G0102497600.01.T02 | Pectin acetyltransferase                                             |
| maker-1-augustus-gene-395.30-mRNA-1 | NA | NA       |           |              |                          | Far-red impaired response-like                                       |

|                                     |    |        |           |              |                          |                                                                            |
|-------------------------------------|----|--------|-----------|--------------|--------------------------|----------------------------------------------------------------------------|
| maker-1-augustus-gene-395.32-mRNA-1 | NA | NA     |           | 0            | OsR498G0102500400.01.T01 |                                                                            |
| maker-1-augustus-gene-395.34-mRNA-1 | NA | NA     |           | Os01g0893700 | OsR498G0102500600.01.T01 | DOMON domain-containing protein                                            |
| maker-1-augustus-gene-395.7-mRNA-1  | NA | NA     |           | 0            | OsR498G0407890700.01.T01 |                                                                            |
| maker-1-augustus-gene-396.46-mRNA-1 | NA | NA     |           | Os01g0894000 | OsR498G0102501300.01.T02 | Metallophos domain-containing protein (Fragment)                           |
| maker-1-augustus-gene-396.49-mRNA-1 | NA | NA     |           | Os01g0894500 | OsR498G0102502500.01.T03 | Selenoprotein F                                                            |
| maker-1-augustus-gene-396.51-mRNA-1 | NA | NA     |           |              |                          |                                                                            |
| maker-1-augustus-gene-396.53-mRNA-1 | NA | NA     |           | Os01g0895200 | OsR498G0102504300.01.T01 | Putative DOMON domain, cytochrome b561/ferric reductase transmembran       |
| maker-1-augustus-gene-396.55-mRNA-1 | NA | Indica |           | Os01g0895300 | OsR498G0102505100.01.T01 | Cytochrome b561 domain-containing protein (Fragment)                       |
| maker-1-augustus-gene-396.63-mRNA-1 | NA | Indica |           | Os01g0896300 | OsR498G0102506100.01.T02 | Chromatin assembly factor 1 subunit FSM                                    |
| maker-1-augustus-gene-396.66-mRNA-1 | NA | NA     |           | Os01g0896800 | OsR498G0102506700.01.T01 | 60S ribosomal protein L5-1 homolog a                                       |
| maker-1-augustus-gene-396.70-mRNA-1 | NA | NA     |           | Os01g0896800 | OsR498G0102506900.01.T01 | 60S ribosomal protein L5-1 homolog a                                       |
| maker-1-augustus-gene-396.72-mRNA-1 | NA | NA     |           | Os01g0894300 | OsR498G0102501800.01.T01 | Putative fructokinase-2                                                    |
| maker-1-augustus-gene-396.77-mRNA-1 | NA | NA     |           | Os01g0894600 | OsR498G0102502800.01.T04 | RING-CH-type domain-containing protein                                     |
| maker-1-augustus-gene-396.81-mRNA-1 | NA | NA     |           | Os01g0894700 |                          | Trigger factor                                                             |
| maker-1-augustus-gene-396.84-mRNA-1 | NA | NA     |           | Os01g0895100 | OsR498G0102504200.01.T01 | Membrane-associated protein VIPP1 chloroplastic                            |
| maker-1-augustus-gene-396.87-mRNA-1 | NA | Indica |           | Os05g0507300 | OsR498G0102505800.01.T01 | Calreticulin/calnexin                                                      |
| maker-1-augustus-gene-396.93-mRNA-1 | NA | NA     |           | Os01g0896500 | OsR498G0102506400.01.T03 | Rhodanese domain-containing protein                                        |
| maker-1-augustus-gene-397.32-mRNA-1 | NA | NA     |           | Os01g0897100 | OsR498G0102507700.01.T02 | Heat stress transcription factor B-1                                       |
| maker-1-augustus-gene-397.39-mRNA-1 | NA | NA     |           | Os01g0898400 | OsR498G0102513500.01.T02 |                                                                            |
| maker-1-augustus-gene-397.43-mRNA-1 | NA | NA     |           | Os01g0898500 | OsR498G0102513700.01.T01 | Patatin                                                                    |
| maker-1-augustus-gene-397.46-mRNA-1 | NA | NA     |           |              |                          |                                                                            |
| maker-1-augustus-gene-397.48-mRNA-1 | NA | Indica | Kinase    | Os08g0512600 | OsR498G0102507600.01.T01 | Cell division control protein 2                                            |
| maker-1-augustus-gene-397.52-mRNA-1 | NA | NA     |           | Os01g0897200 | OsR498G0102508000.01.T03 | Ribonuclease 2                                                             |
| maker-1-augustus-gene-397.56-mRNA-1 | NA | Indica |           | Os01g0897300 | OsR498G0102508400.01.T02 | Ribonuclease 2                                                             |
| maker-1-augustus-gene-397.59-mRNA-1 | NA | NA     |           | 0            | OsR498G0102509600.01.T01 | Formin-like protein 1                                                      |
| maker-1-augustus-gene-397.61-mRNA-1 | NA | NA     |           | Os01g0897800 | OsR498G0102511200.01.T04 | Sister chromatid cohesion 1 protein 4                                      |
| maker-1-augustus-gene-397.67-mRNA-1 | NA | NA     |           | 0            | OsR498G0102511800.01.T01 |                                                                            |
| maker-1-augustus-gene-397.69-mRNA-1 | NA | NA     |           | Os01g0898300 | OsR498G0102513000.01.T01 | ARM repeat superfamily protein                                             |
| maker-1-augustus-gene-397.75-mRNA-1 | NA | NA     |           | Os01g0898600 | OsR498G0102514000.01.T01 |                                                                            |
| maker-1-augustus-gene-398.0-mRNA-1  | NA | NA     |           | Os01g0898800 | OsR498G0102514700.01.T02 | Zygote defective protein 12 (Fragment)                                     |
| maker-1-augustus-gene-398.16-mRNA-1 | NA | NA     | Kinase-TM | Os01g0899000 | OsR498G0102515200.01.T03 | Tyrosine-protein kinase                                                    |
| maker-1-augustus-gene-398.2-mRNA-1  | NA | NA     |           | Os01g0898900 | OsR498G0102514900.01.T04 | Nucleotide-sugar transporter                                               |
| maker-1-augustus-gene-398.20-mRNA-1 | NA | NA     |           |              |                          | Methyltransferase                                                          |
| maker-1-augustus-gene-398.24-mRNA-1 | NA | NA     |           | Os01g0899500 | OsR498G0102518200.01.T04 | Pentatricopeptide repeat superfamily protein isoform 1                     |
| maker-1-augustus-gene-398.29-mRNA-1 | NA | NA     |           | Os01g0899700 | OsR498G0102518400.01.T01 | Extensin repeat-containing protein                                         |
| maker-1-augustus-gene-398.31-mRNA-1 | NA | Indica |           | Os01g0899800 | OsR498G0102518800.01.T01 | AP2-like ethylene-responsive transcription factor BBM2                     |
| maker-1-augustus-gene-398.7-mRNA-1  | NA | NA     |           | Os01g0899100 | OsR498G0102515500.01.T01 |                                                                            |
| maker-1-augustus-gene-398.9-mRNA-1  | NA | NA     |           | 0            | OsR498G0102520500.01.T01 | Sn1-specific diacylglycerol lipase alpha                                   |
| maker-1-augustus-gene-399.0-mRNA-1  | NA | NA     |           | Os01g0900800 | OsR498G0102525300.01.T01 | Flowering BHLH 1                                                           |
| maker-1-augustus-gene-399.11-mRNA-1 | NA | NA     |           | 0            | OsR498G0102527900.01.T01 | 4-coumarate--CoA ligase-like 9 isoform A                                   |
| maker-1-augustus-gene-399.14-mRNA-1 | NA | NA     |           | 0            | OsR498G0102528100.01.T01 | FAD/NAD(P)-binding oxidoreductase family protein                           |
| maker-1-augustus-gene-399.20-mRNA-1 | NA | NA     |           | Os01g0900900 | OsR498G0102525600.01.T02 | OTU domain-containing protein isoform A                                    |
| maker-1-augustus-gene-399.24-mRNA-1 | NA | NA     |           | Os01g0901000 | OsR498G0102526000.01.T03 | RING-type E3 ubiquitin transferase                                         |
| maker-1-augustus-gene-399.28-mRNA-1 | NA | NA     |           | Os01g0901200 | OsR498G0102527000.01.T01 | DNA repair protein recA                                                    |
| maker-1-augustus-gene-399.4-mRNA-1  | NA | NA     |           | 0            | OsR498G0102527100.01.T02 | GDP-L-galactose phosphorylase                                              |
| maker-1-augustus-gene-399.9-mRNA-1  | NA | NA     |           | 0            | OsR498G0102527700.01.T03 | 4-coumarate--CoA ligase-like 9                                             |
| maker-1-augustus-gene-40.26-mRNA-1  | NA | NA     |           | Os01g0177200 | OsR498G0100258300.01.T01 | Ubiquitin carboxyl-terminal hydrolase                                      |
| maker-1-augustus-gene-400.0-mRNA-1  | NA | NA     |           | Os01g0902200 | OsR498G0102529300.01.T01 | Thimet oligopeptidase                                                      |
| maker-1-augustus-gene-400.1-mRNA-1  | NA | NA     |           | Os01g0902200 | OsR498G0102529300.01.T04 | Thimet oligopeptidase                                                      |
| maker-1-augustus-gene-400.12-mRNA-1 | NA | Indica |           | Os01g0902800 | OsR498G0102530100.01.T01 | Peptide transporter 1                                                      |
| maker-1-augustus-gene-400.14-mRNA-1 | NA | NA     |           | Os01g0902800 | OsR498G0102530300.01.T01 | Peptide transporter                                                        |
| maker-1-augustus-gene-400.18-mRNA-1 | NA | Indica |           | Os01g0904300 | OsR498G0102533100.01.T01 | DUF971 domain-containing protein (Fragment)                                |
| maker-1-augustus-gene-400.23-mRNA-1 | NA | NA     |           | Os01g0901800 | OsR498G0102528400.01.T02 | Putative membrane protein YuiD                                             |
| maker-1-augustus-gene-400.27-mRNA-1 | NA | Indica |           | Os01g0901900 | OsR498G0102528600.01.T01 | Protein PLASTID TRANSCRIPTIONALLY ACTIVE 10 like                           |
| maker-1-augustus-gene-400.33-mRNA-1 | NA | NA     |           | 0            | OsR498G0102529000.01.T01 | Multidrug resistance-associated protein/mitoxantrone resistance protein, A |
| maker-1-augustus-gene-400.39-mRNA-1 | NA | NA     |           | Os01g0902300 | OsR498G0102529600.01.T01 | Esterase, putative, expressed                                              |
| maker-1-augustus-gene-400.41-mRNA-1 | NA | NA     |           | 0            | OsR498G0102532800.01.T01 |                                                                            |
| maker-1-augustus-gene-400.43-mRNA-1 | NA | NA     |           | Os01g0904200 | OsR498G0102533000.01.T06 | Putative serine/threonine-protein kinase abkB                              |
| maker-1-augustus-gene-400.52-mRNA-1 | NA | NA     |           | Os01g0904500 | OsR498G0102533800.01.T02 | Peptidyl serine alpha-galactosyltransferase                                |
| maker-1-augustus-gene-401.11-mRNA-1 | NA | NA     |           | Os01g0627800 | OsR498G0101582300.01.T01 | Secologanin synthase                                                       |
| maker-1-augustus-gene-401.13-mRNA-1 | NA | NA     |           | Os01g0627400 | OsR498G0101580700.01.T01 | Secologanin synthase                                                       |

|                                     |    |          |           |              |                          |                                                         |
|-------------------------------------|----|----------|-----------|--------------|--------------------------|---------------------------------------------------------|
| maker-1-augustus-gene-401.15-mRNA-1 | NA | NA       |           | Os01g0626400 | OsR498G0101577900.01.T01 | WRKY transcription factor                               |
| maker-1-augustus-gene-401.17-mRNA-1 | NA | NA       |           | 0            | OsR498G0101577500.01.T01 |                                                         |
| maker-1-augustus-gene-401.4-mRNA-1  | NA | NA       |           | Os01g0627500 | OsR498G0101581000.01.T01 | Secologanin synthase                                    |
| maker-1-augustus-gene-401.7-mRNA-1  | NA | Indica   |           | Os01g0904700 | OsR498G0102534400.01.T01 | Two-component response regulator ORR26                  |
| maker-1-augustus-gene-402.0-mRNA-1  | NA | NA       |           | 0            | OsR498G0101577200.01.T02 |                                                         |
| maker-1-augustus-gene-402.11-mRNA-1 | NA | NA       |           | Os01g0625300 | OsR498G0101575700.01.T01 | Heat shock transcription factor                         |
| maker-1-augustus-gene-402.13-mRNA-1 | NA | NA       |           | 0            | OsR498G0101575300.01.T01 | Kinesin-like protein KIN-13B                            |
| maker-1-augustus-gene-402.20-mRNA-1 | NA | NA       |           | Os01g0624500 | OsR498G0101574500.01.T01 | Suppressor of the G2                                    |
| maker-1-augustus-gene-402.24-mRNA-1 | NA | NA       |           | Os01g0624400 | OsR498G0101574300.01.T02 | Late embryogenesis abundant                             |
| maker-1-augustus-gene-402.27-mRNA-1 | NA | NA       |           | Os01g0623500 | OsR498G0101571300.01.T01 | ATPase family AAA domain-containing protein 1-A         |
| maker-1-augustus-gene-402.9-mRNA-1  | NA | Indica   |           | Os01g0891100 | OsR498G0101571600.01.T01 | Endo-polygalacturonase                                  |
| maker-1-augustus-gene-403.0-mRNA-1  | NA | Indica   |           | Os01g0623200 | OsR498G0101568400.01.T03 | S-type anion channel SLAH3                              |
| maker-1-augustus-gene-403.10-mRNA-1 | NA | NA       |           | 0            | OsR498G0101565200.01.T03 | Glycosyl transferase family 1 protein isoform 1         |
| maker-1-augustus-gene-403.15-mRNA-1 | NA | Indica   |           | Os05g0585500 | OsR498G0101565900.01.T01 | Calcium-dependent protein kinase 1 isoform A            |
| maker-1-augustus-gene-403.23-mRNA-1 | NA | NA       |           | Os01g0621700 | OsR498G0101563100.01.T01 | TH1 domain-containing protein (Fragment)                |
| maker-1-augustus-gene-403.3-mRNA-1  | NA | NA       |           | Os01g0622700 | OsR498G0101566200.01.T01 | Probable protein ABIL1                                  |
| maker-1-augustus-gene-403.8-mRNA-1  | NA | NA       |           | Os01g0622300 | OsR498G0101565600.01.T03 | Uroporphyrinogen decarboxylase like                     |
| maker-1-augustus-gene-404.31-mRNA-1 | NA | NA       | Kinase-TM | Os01g0621600 | OsR498G0101562800.01.T02 | Serine/threonine-protein kinase MARK2                   |
| maker-1-augustus-gene-404.33-mRNA-1 | NA | NA       |           | 0            | OsR498G0101562000.01.T03 | Extra-large G-protein-like                              |
| maker-1-augustus-gene-404.36-mRNA-1 | NA | Indica   |           | Os01g0621200 | OsR498G0101561600.01.T01 | probable GABA transporter 2                             |
| maker-1-augustus-gene-404.39-mRNA-1 | NA | NA       |           | Os01g0620100 | OsR498G0101558200.01.T01 | Nucleoporin SEH1                                        |
| maker-1-augustus-gene-404.45-mRNA-1 | NA | Indica   |           | Os01g0619800 | OsR498G0101557500.01.T02 | Chitinase domain-containing protein 1                   |
| maker-1-augustus-gene-405.29-mRNA-1 | NA | NA       |           | 0            | OsR498G0101555600.01.T01 | MYB-like transcription factor ETC3                      |
| maker-1-augustus-gene-405.31-mRNA-1 | NA | Indica   |           | Os01g0619000 | OsR498G0101555000.01.T01 | Polypyrimidine tract-binding                            |
| maker-1-augustus-gene-405.35-mRNA-1 | NA | NA       |           | 0            | OsR498G0101554200.01.T03 | ATP-dependent metalloprotease                           |
| maker-1-augustus-gene-405.42-mRNA-1 | NA | Indica   |           | Os01g0618900 | OsR498G0101554700.01.T01 | Pectin lyase-like superfamily protein (Fragment)        |
| maker-1-augustus-gene-405.46-mRNA-1 | NA | NA       |           | 0            | OsR498G0101553700.01.T01 | Regulatory component of ABA receptor 1                  |
| maker-1-augustus-gene-405.50-mRNA-1 | NA | NA       |           | Os01g0618500 | OsR498G0101553100.01.T01 | DEAD-box ATP-dependent RNA helicase                     |
| maker-1-augustus-gene-405.53-mRNA-1 | NA | NA       |           | Os01g0618400 | OsR498G0101552900.01.T01 | DEAD-box ATP-dependent RNA helicase                     |
| maker-1-augustus-gene-406.0-mRNA-1  | NA | NA       |           | Os01g0618300 | OsR498G0101552600.01.T01 |                                                         |
| maker-1-augustus-gene-406.11-mRNA-1 | NA | NA       |           | Os01g0617600 | OsR498G0101550000.01.T03 | PORR domain-containing protein (Fragment)               |
| maker-1-augustus-gene-406.12-mRNA-1 | NA | NA       |           | Os01g0617500 | OsR498G0101549200.01.T01 | N-alpha-acetyltransferase 16, NatA auxiliary subunit    |
| maker-1-augustus-gene-406.19-mRNA-1 | NA | Indica   |           | Os05g0573300 | OsR498G0101547800.01.T01 | CTP synthase                                            |
| maker-1-augustus-gene-406.2-mRNA-1  | NA | NA       |           | Os01g0618100 | OsR498G0101551600.01.T02 | Auxin-induced protein PCNT115                           |
| maker-1-augustus-gene-406.25-mRNA-1 | NA | Indica   |           | Os01g0618200 | OsR498G0101551700.01.T02 | Protein-serine/threonine phosphatase                    |
| maker-1-augustus-gene-406.27-mRNA-1 | NA | NA       |           | Os01g0617900 | OsR498G0101550900.01.T01 | PsbP domain-containing protein 5 chloroplastic          |
| maker-1-augustus-gene-406.30-mRNA-1 | NA | NA       |           | Os01g0617700 | OsR498G0101550500.01.T04 |                                                         |
| maker-1-augustus-gene-406.7-mRNA-1  | NA | NA       |           | Os01g0617800 | OsR498G0101550800.01.T01 | Unconventional prefoldin RPB5 interactor 1              |
| maker-1-augustus-gene-407.29-mRNA-1 | NA | NA       |           | Os01g0616400 | OsR498G0101546400.01.T02 | Zinc finger CCH domain-containing protein 8             |
| maker-1-augustus-gene-407.33-mRNA-1 | NA | NA       |           | Os01g0615300 | OsR498G0101541200.01.T01 | 10-deacetylbaccatin III-10-O-acetyl transferase         |
| maker-1-augustus-gene-407.35-mRNA-1 | NA | NA       |           | Os01g0615200 | OsR498G0101541000.01.T02 | 10-deacetylbaccatin III-10-O-acetyl transferase         |
| maker-1-augustus-gene-407.37-mRNA-1 | NA | NA       |           |              |                          | Berberine bridge enzyme-like protein 13                 |
| maker-1-augustus-gene-407.39-mRNA-1 | NA | NA       |           | Os01g0616500 | OsR498G0101546500.01.T01 | 39S ribosomal protein L22, mitochondrial-like           |
| maker-1-augustus-gene-407.42-mRNA-1 | NA | Indica   |           | Os05g0587300 | OsR498G0101545900.01.T02 | TPR repeat-containing thioredoxin TTL1                  |
| maker-1-augustus-gene-407.46-mRNA-1 | NA | Indica   |           | Os01g0616100 | OsR498G0101542500.01.T07 | Kinase family with ARM repeat domain-containing protein |
| maker-1-augustus-gene-408.0-mRNA-1  | NA | NA       |           | Os01g0614900 | OsR498G0101539800.01.T03 | Ubiquitin-like modifier-activating enzyme ATG7          |
| maker-1-augustus-gene-408.10-mRNA-1 | NA | NA       |           | Os01g0613800 | OsR498G0101536800.01.T01 | Senescence-specific cysteine protease SAG39             |
| maker-1-augustus-gene-408.12-mRNA-1 | NA | NA       |           | Os01g0613500 | OsR498G0101536000.01.T01 | Cysteine proteinase-like                                |
| maker-1-augustus-gene-408.14-mRNA-1 | NA | Indica   |           | Os01g0614700 | OsR498G0101539500.01.T01 | Adaptin ear-binding coat-associated protein 1           |
| maker-1-augustus-gene-408.19-mRNA-1 | NA | NA       |           | Os01g0614300 | OsR498G0101538300.01.T01 | Protein trichome birefringence                          |
| maker-1-augustus-gene-408.21-mRNA-1 | NA | NA       |           | Os01g0613300 | OsR498G0101535700.01.T01 | Lipoprotein lpqB (Fragment)                             |
| maker-1-augustus-gene-408.24-mRNA-1 | NA | NA       |           | 0            | OsR498G0101533500.01.T01 | GDSL esterase/lipase                                    |
| maker-1-augustus-gene-408.27-mRNA-1 | NA | NA       |           | Os01g0612800 | OsR498G0101532900.01.T03 | Plastid transcriptionally active protein                |
| maker-1-augustus-gene-408.3-mRNA-1  | NA | NA       |           | Os01g0613900 | OsR498G0101537000.01.T02 | Maternal effect embryo arrest 18                        |
| maker-1-augustus-gene-409.25-mRNA-1 | NA | NA       |           | 0            | OsR498G0101527000.01.T08 | DNA methyl transferase4                                 |
| maker-1-augustus-gene-409.31-mRNA-1 | NA | Indica   |           | Os01g0612700 | OsR498G0101532700.01.T03 | zf-LSD1 domain-containing protein                       |
| maker-1-augustus-gene-409.35-mRNA-1 | NA | Indica   |           | Os01g0612500 | OsR498G0101530100.01.T01 | Acyl-protein thioesterase 2                             |
| maker-1-augustus-gene-409.39-mRNA-1 | NA | NA       |           | Os01g0612200 | OsR498G0101528100.01.T01 | Cytochrome c oxidase polypeptide Vb                     |
| maker-1-augustus-gene-409.43-mRNA-1 | NA | Japonica |           | Os01g0612100 | OsR498G0306062000.01.T02 | Small subunit ribosomal protein (Fragment)              |
| maker-1-augustus-gene-409.45-mRNA-1 | NA | Indica   |           | Os07g0218200 | OsR498G0101526300.01.T01 | (S)-beta-bisabolene synthase                            |
| maker-1-augustus-gene-410.0-mRNA-1  | NA | NA       |           | Os01g0610800 | OsR498G0101521400.01.T01 | Papilin-like protein isoform X1                         |

|                                     |    |          |           |              |                          |                                                                             |
|-------------------------------------|----|----------|-----------|--------------|--------------------------|-----------------------------------------------------------------------------|
| maker-1-augustus-gene-410.12-mRNA-1 | NA | NA       |           | Os01g0610500 | OsR498G0101520600.01.T01 | Yip1 domain-containing protein                                              |
| maker-1-augustus-gene-410.15-mRNA-1 | NA | NA       |           | Os01g0609900 | OsR498G0101517800.01.T02 | Pleiotropic drug resistance protein 4                                       |
| maker-1-augustus-gene-410.19-mRNA-1 | NA | NA       |           |              |                          | GTP-binding nuclear protein Ran-1                                           |
| maker-1-augustus-gene-410.22-mRNA-1 | NA | NA       |           | Os01g0611000 | OsR498G0101522300.01.T01 | GTP-binding nuclear protein Ran-3                                           |
| maker-1-augustus-gene-410.24-mRNA-1 | NA | Indica   |           | Os01g0610400 | OsR498G0101520100.01.T02 | N-alpha-acetyltransferase 50                                                |
| maker-1-augustus-gene-410.26-mRNA-1 | NA | NA       |           | Os01g0610300 | OsR498G0101519900.01.T03 | BAH domain-containing protein                                               |
| maker-1-augustus-gene-410.3-mRNA-1  | NA | NA       |           | Os01g0610700 | OsR498G0101521200.01.T01 | RING-CH-type domain-containing protein (Fragment)                           |
| maker-1-augustus-gene-410.32-mRNA-1 | NA | NA       |           | Os01g0610100 | OsR498G0101518900.01.T01 | ATPase, F0/V0 complex, subunit C protein                                    |
| maker-1-augustus-gene-410.6-mRNA-1  | NA | NA       |           | Os01g0610600 | OsR498G0101521000.01.T03 | Carbon catabolite repressor protein 4 like 6                                |
| maker-1-augustus-gene-411.19-mRNA-1 | NA | NA       |           | Os01g0609300 | OsR498G0101515200.01.T01 | pleiotropic drug resistance protein 1-like                                  |
| maker-1-augustus-gene-411.23-mRNA-1 | NA | Indica   |           | Os01g0609066 | OsR498G0101514400.01.T01 | Pleiotropic drug resistance protein 3                                       |
| maker-1-augustus-gene-411.24-mRNA-1 | NA | NA       |           | Os01g0609200 | OsR498G0101514400.01.T01 | ABC transporter domain-containing protein                                   |
| maker-1-augustus-gene-411.28-mRNA-1 | NA | NA       |           | Os01g0609066 | OsR498G0101514000.01.T02 | ABC transporter G family member 34                                          |
| maker-1-augustus-gene-411.31-mRNA-1 | NA | NA       | CC-NBS-TM | 0            | OsR498G1120729200.01.T01 | AAA domain-containing protein                                               |
| maker-1-augustus-gene-411.34-mRNA-1 | NA | NA       |           | 0            | OsR498G0101509900.01.T01 | RING-H2 finger protein ATL5A                                                |
| maker-1-augustus-gene-412.15-mRNA-1 | NA | NA       |           | Os01g0608366 |                          | Peptidase A1 domain-containing protein (Fragment)                           |
| maker-1-augustus-gene-412.22-mRNA-1 | NA | NA       |           | Os01g0607200 | OsR498G0101503700.01.T01 | Amino-acid permease BAT1 like                                               |
| maker-1-augustus-gene-412.23-mRNA-1 | NA | NA       |           | Os01g0607200 | OsR498G0101503300.01.T01 | Amino-acid permease BAT1                                                    |
| maker-1-augustus-gene-412.3-mRNA-1  | NA | NA       |           |              |                          | Transcriptional corepressor LEUNIG                                          |
| maker-1-augustus-gene-412.34-mRNA-1 | NA | NA       |           | Os01g0606900 | OsR498G0101502300.01.T01 | J domain-containing protein                                                 |
| maker-1-augustus-gene-412.6-mRNA-1  | NA | NA       |           | Os01g0607400 | OsR498G0101504200.01.T03 | Transcriptional corepressor LEUNIG                                          |
| maker-1-augustus-gene-413.46-mRNA-1 | NA | NA       |           | Os01g0606200 |                          |                                                                             |
| maker-1-augustus-gene-413.48-mRNA-1 | NA | NA       |           | Os01g0605850 |                          |                                                                             |
| maker-1-augustus-gene-413.50-mRNA-1 | NA | Japonica |           | Os01g0605500 | OsR498G0101498200.01.T01 | Kinesin-like protein KIN-8A                                                 |
| maker-1-augustus-gene-413.53-mRNA-1 | NA | NA       |           | Os01g0605200 | OsR498G0101497400.01.T04 | DNL-type domain-containing protein (Fragment)                               |
| maker-1-augustus-gene-413.56-mRNA-1 | NA | NA       |           | Os01g0604700 | OsR498G0101495000.01.T01 | Transmembrane protein 33                                                    |
| maker-1-augustus-gene-413.60-mRNA-1 | NA | NA       |           | Os01g0606000 | OsR498G0101499300.01.T01 | Bidirectional sugar transporter SWEET                                       |
| maker-1-augustus-gene-413.62-mRNA-1 | NA | NA       |           | Os01g0605700 | OsR498G0101498500.01.T01 | Bidirectional sugar transporter SWEET                                       |
| maker-1-augustus-gene-413.67-mRNA-1 | NA | NA       |           | Os01g0605400 | OsR498G0101497900.01.T02 | Protein GAMETE EXPRESSED 3                                                  |
| maker-1-augustus-gene-413.69-mRNA-1 | NA | NA       |           | Os01g0605300 | OsR498G0101497900.01.T01 | UBC core domain-containing protein (Fragment)                               |
| maker-1-augustus-gene-413.71-mRNA-1 | NA | Indica   |           | Os01g0605100 | OsR498G0101497700.01.T02 | Adenosinetriphosphatase                                                     |
| maker-1-augustus-gene-414.34-mRNA-1 | NA | NA       |           |              |                          |                                                                             |
| maker-1-augustus-gene-414.36-mRNA-1 | NA | NA       |           | Os01g0603000 | OsR498G0101486800.01.T01 | RGG repeats nuclear RNA binding protein A                                   |
| maker-1-augustus-gene-414.41-mRNA-1 | NA | Japonica |           | Os01g0604100 | OsR498G0100035900.01.T05 | Usp domain-containing protein                                               |
| maker-1-augustus-gene-414.43-mRNA-1 | NA | NA       |           | Os01g0603300 | OsR498G0101487900.01.T01 | Transcription factor MYB53                                                  |
| maker-1-augustus-gene-414.45-mRNA-1 | NA | NA       | NBS-TM    | 0            | OsR498G0101487100.01.T01 | Mitochondrial import inner membrane translocase subunit                     |
| maker-1-augustus-gene-414.47-mRNA-1 | NA | NA       | Kinase-TM | 0            | OsR498G0101485500.01.T05 | Kinase protein with adenine nucleotide alpha hydrolases-like domain isoform |
| maker-1-augustus-gene-415.23-mRNA-1 | NA | Indica   |           | Os11g0566800 | OsR498G0101483200.01.T01 | Chalcone synthase F                                                         |
| maker-1-augustus-gene-415.40-mRNA-1 | NA | Japonica |           | Os01g0602400 | OsR498G0101582500.01.T01 | Secologanin synthase                                                        |
| maker-1-augustus-gene-415.44-mRNA-1 | NA | Japonica |           | Os01g0602200 | OsR498G0101482200.01.T03 | Secologanin synthase                                                        |
| maker-1-augustus-gene-415.56-mRNA-1 | NA | Indica   | Kinase-TM | Os01g0601200 | OsR498G0101477700.01.T01 | Putative serine/threonine-protein kinase                                    |
| maker-1-augustus-gene-416.0-mRNA-1  | NA | Indica   |           | Os02g0226200 | OsR498G0101475400.01.T01 | Pyridoxal phosphate phosphatase-related protein                             |
| maker-1-augustus-gene-416.11-mRNA-1 | NA | Indica   |           | Os01g0600300 | OsR498G0101474700.01.T01 |                                                                             |
| maker-1-augustus-gene-416.15-mRNA-1 | NA | Indica   |           | Os02g0224200 | OsR498G0101474500.01.T01 | Serine/threonine-protein phosphatase 2A 55 kDa regulatory subunit B         |
| maker-1-augustus-gene-416.2-mRNA-1  | NA | NA       |           | Os01g0600000 | OsR498G0101474200.01.T03 | Hydrogen-transporting ATP synthase, rotational mechanism                    |
| maker-1-augustus-gene-416.20-mRNA-1 | NA | Japonica |           | Os01g0599900 | OsR498G0101473900.01.T01 | SUN domain-containing protein (Fragment)                                    |
| maker-1-augustus-gene-416.26-mRNA-1 | NA | NA       |           | Os01g0598200 | OsR498G0101471100.01.T02 | Calcineurin B-like protein 5 variant                                        |
| maker-1-augustus-gene-416.6-mRNA-1  | NA | NA       |           | Os01g0598900 | OsR498G0101473200.01.T03 | Cytoplasmic tRNA 2-thiolation protein 1                                     |
| maker-1-augustus-gene-417.38-mRNA-1 | NA | Indica   |           | Os01g0597800 | OsR498G0101469500.01.T01 | Glycosyltransferase                                                         |
| maker-1-augustus-gene-417.40-mRNA-1 | NA | NA       |           | Os01g0597600 | OsR498G0101469100.01.T01 | Amino acid transporter, transmembrane                                       |
| maker-1-augustus-gene-417.41-mRNA-1 | NA | Japonica |           | Os01g0597400 | OsR498G0101468700.01.T01 | Amino acid/polyamine transporter II                                         |
| maker-1-augustus-gene-417.43-mRNA-1 | NA | NA       |           | Os01g0596700 | OsR498G0101466500.01.T01 | FBD domain-containing protein                                               |
| maker-1-augustus-gene-417.45-mRNA-1 | NA | NA       |           |              |                          | FBD domain-containing protein                                               |
| maker-1-augustus-gene-418.10-mRNA-1 | NA | Japonica |           | Os01g0596000 | OsR498G0101462900.01.T01 | FBD domain-containing protein                                               |
| maker-1-augustus-gene-418.12-mRNA-1 | NA | NA       |           | Os01g0595900 | OsR498G0101462700.01.T01 | FBD domain-containing protein (Fragment)                                    |
| maker-1-augustus-gene-418.14-mRNA-1 | NA | NA       |           | Os01g0595800 | OsR498G0101462500.01.T01 | FBD domain-containing protein                                               |
| maker-1-augustus-gene-418.16-mRNA-1 | NA | Japonica |           | Os01g0595700 | OsR498G0101462300.01.T01 | Ribosomal RNA apurinic site specific lyase                                  |
| maker-1-augustus-gene-418.19-mRNA-1 | NA | Japonica |           | Os01g0595600 | OsR498G0101462100.01.T01 | Strigolactone esterase                                                      |
| maker-1-augustus-gene-418.2-mRNA-1  | NA | NA       |           | Os01g0594700 |                          | DAO domain-containing protein                                               |
| maker-1-augustus-gene-418.22-mRNA-1 | NA | Indica   |           | Os01g0719600 | OsR498G0101460100.01.T01 | HMA domain-containing protein (Fragment)                                    |
| maker-1-augustus-gene-418.25-mRNA-1 | NA | NA       |           | 0            | OsR498G0101459700.01.T03 | CASC3/Barentsz eIF4AIII binding                                             |



|                                     |    |        |           |              |                          |                                                                               |
|-------------------------------------|----|--------|-----------|--------------|--------------------------|-------------------------------------------------------------------------------|
| maker-1-augustus-gene-418.4-mRNA-1  | NA | NA     |           | Os01g0594500 | OsR498G0101457800.01.T01 |                                                                               |
| maker-1-augustus-gene-418.6-mRNA-1  | NA | NA     |           | Os01g0596300 | OsR498G0101463900.01.T01 | FBD domain-containing protein                                                 |
| maker-1-augustus-gene-418.8-mRNA-1  | NA | NA     |           | Os01g0596100 | OsR498G0101463300.01.T01 | Ribosomal RNA apurinic site specific lyase-like                               |
| maker-1-augustus-gene-419.25-mRNA-1 | NA | NA     |           | 0            | OsR498G0101756500.01.T01 | Putative Pyridoxal phosphate (PLP)-dependent transferases superfamily pro     |
| maker-1-augustus-gene-419.30-mRNA-1 | NA | NA     |           | Os01g0840700 | OsR498G0102306200.01.T01 | 60S ribosomal protein L36                                                     |
| maker-1-augustus-gene-419.33-mRNA-1 | NA | NA     |           |              |                          | Homeobox domain-containing protein                                            |
| maker-1-augustus-gene-42.13-mRNA-1  | NA | Indica |           | Os01g0180300 | OsR498G0100271400.01.T01 | MAR-binding filament-like protein 1                                           |
| maker-1-augustus-gene-42.17-mRNA-1  | NA | NA     |           | 0            | OsR498G0100271800.01.T03 | FLZ-type domain-containing protein (Fragment)                                 |
| maker-1-augustus-gene-420.36-mRNA-1 | NA | NA     |           | 0            | OsR498G0102307700.01.T02 | ENTH domain-containing protein                                                |
| maker-1-augustus-gene-420.40-mRNA-1 | NA | NA     |           | Os01g0841500 | OsR498G0102309500.01.T01 | Transcriptional activator Myb                                                 |
| maker-1-augustus-gene-420.43-mRNA-1 | NA | NA     |           | Os01g0841600 | OsR498G0102309700.01.T01 | Triose phosphate isomerase5                                                   |
| maker-1-augustus-gene-420.51-mRNA-1 | NA | NA     |           | Os01g0841200 | OsR498G0102308400.01.T02 | O-fucosyltransferase family protein (Fragment)                                |
| maker-1-augustus-gene-420.56-mRNA-1 | NA | Indica |           | Os01g0841800 | OsR498G0102310200.01.T01 | RNB domain-containing protein                                                 |
| maker-1-augustus-gene-420.63-mRNA-1 | NA | NA     |           | Os01g0842400 | OsR498G0102312600.01.T01 | Laccase                                                                       |
| maker-1-augustus-gene-420.65-mRNA-1 | NA | NA     |           | Os01g0842500 | OsR498G0102313000.01.T01 | Laccase                                                                       |
| maker-1-augustus-gene-420.70-mRNA-1 | NA | NA     |           | Os01g0842600 | OsR498G0102313400.01.T01 | Mitochondrial FTSH metalloprotease                                            |
| maker-1-augustus-gene-421.38-mRNA-1 | NA | Indica |           | Os03g0810600 | OsR498G0102315900.01.T01 | Mitochondrial Rho GTPase                                                      |
| maker-1-augustus-gene-421.43-mRNA-1 | NA | Indica |           | Os01g0844050 | OsR498G0102317300.01.T01 | Laccase                                                                       |
| maker-1-augustus-gene-421.46-mRNA-1 | NA | NA     |           | Os01g0844300 | OsR498G0102318300.01.T05 | Peptidylprolyl isomerase                                                      |
| maker-1-augustus-gene-421.49-mRNA-1 | NA | NA     |           | Os01g0844800 | OsR498G0102321100.01.T02 | PUM-HD domain-containing protein                                              |
| maker-1-augustus-gene-421.55-mRNA-1 | NA | NA     |           | 0            | OsR498G0102313600.01.T01 | WRKY transcription factor                                                     |
| maker-1-augustus-gene-421.58-mRNA-1 | NA | NA     |           | 0            | OsR498G0102315400.01.T01 |                                                                               |
| maker-1-augustus-gene-421.59-mRNA-1 | NA | NA     |           | Os01g0844400 | OsR498G0102318600.01.T04 | S-acyltransferase                                                             |
| maker-1-augustus-gene-422.40-mRNA-1 | NA | NA     |           | Os12g0539800 | OsR498G1221780600.01.T01 |                                                                               |
| maker-1-augustus-gene-422.43-mRNA-1 | NA | NA     |           | Os01g0846300 | OsR498G0102325500.01.T01 | Protein-serine/threonine phosphatase                                          |
| maker-1-augustus-gene-422.46-mRNA-1 | NA | NA     |           |              |                          | Putative polynucleotide adenyllyltransferase                                  |
| maker-1-augustus-gene-422.52-mRNA-1 | NA | NA     |           | Os01g0846500 | OsR498G0102326300.01.T04 | PAP/25A-associated                                                            |
| maker-1-augustus-gene-422.62-mRNA-1 | NA | Indica |           | Os03g0855700 | OsR498G0102324800.01.T02 | DUF223 domain-containing protein                                              |
| maker-1-augustus-gene-422.66-mRNA-1 | NA | Indica |           | Os01g0630700 | OsR498G1221780100.01.T02 | Putative transcription factor DP, helitron helicase-like domain-containing pr |
| maker-1-augustus-gene-422.70-mRNA-1 | NA | NA     |           | 0            | OsR498G1221780100.01.T05 |                                                                               |
| maker-1-augustus-gene-422.72-mRNA-1 | NA | NA     |           | Os01g0846600 | OsR498G0102327000.01.T02 | Methyltransferase                                                             |
| maker-1-augustus-gene-422.75-mRNA-1 | NA | NA     |           | Os01g0846900 | OsR498G0102328000.01.T03 | Transcription initiation factor TFIID                                         |
| maker-1-augustus-gene-423.0-mRNA-1  | NA | NA     |           | Os01g0847200 | OsR498G0102328500.01.T02 | Mannose-1-phosphate guanylyltransferase 1                                     |
| maker-1-augustus-gene-423.10-mRNA-1 | NA | Indica |           | Os05g0456300 | OsR498G0102329700.01.T02 | Aldo-keto reductase family 4 member C9                                        |
| maker-1-augustus-gene-423.14-mRNA-1 | NA | NA     |           | Os01g0848200 | OsR498G0102331100.01.T02 | Delta-1-pyrroline-5-carboxylate synthase                                      |
| maker-1-augustus-gene-423.21-mRNA-1 | NA | NA     |           | Os01g0847300 | OsR498G0102328800.01.T01 |                                                                               |
| maker-1-augustus-gene-423.23-mRNA-1 | NA | NA     |           | Os01g0847900 | OsR498G0102330000.01.T02 |                                                                               |
| maker-1-augustus-gene-423.25-mRNA-1 | NA | NA     |           | Os01g0848400 | OsR498G0102332000.01.T01 | BEL1-like homeodomain protein 8                                               |
| maker-1-augustus-gene-423.29-mRNA-1 | NA | NA     |           | Os01g0848700 | OsR498G0102333600.01.T01 | Ras-related protein like                                                      |
| maker-1-augustus-gene-423.3-mRNA-1  | NA | Indica |           | Os01g0847700 | OsR498G0102329100.01.T03 | Ald-keto reductase family 4 member C-10 like                                  |
| maker-1-augustus-gene-423.6-mRNA-1  | NA | NA     |           | Os01g0847700 | OsR498G0102329500.01.T01 | Ald-keto reductase family 4 member C-10 like                                  |
| maker-1-augustus-gene-424.0-mRNA-1  | NA | Indica |           | Os01g0848900 | OsR498G0102334700.01.T01 | Hypothetcal protein                                                           |
| maker-1-augustus-gene-424.15-mRNA-1 | NA | Indica |           | Os12g0259800 | OsR498G0102339900.01.T01 | Laccase                                                                       |
| maker-1-augustus-gene-424.18-mRNA-1 | NA | NA     |           | Os01g0850700 | OsR498G0102340300.01.T01 | Laccase                                                                       |
| maker-1-augustus-gene-424.20-mRNA-1 | NA | NA     |           | Os01g0849100 | OsR498G0102335200.01.T01 | PRONE domain-containing protein (Fragment)                                    |
| maker-1-augustus-gene-424.22-mRNA-1 | NA | NA     |           | Os01g0849600 | OsR498G0102335800.01.T01 | Usp domain-containing protein                                                 |
| maker-1-augustus-gene-424.24-mRNA-1 | NA | NA     |           | Os01g0850400 | OsR498G0102339600.01.T01 | Myb-like protein B                                                            |
| maker-1-augustus-gene-424.5-mRNA-1  | NA | NA     |           | Os01g0850000 | OsR498G0102338100.01.T02 |                                                                               |
| maker-1-augustus-gene-424.8-mRNA-1  | NA | NA     |           | Os01g0850100 | OsR498G0102338900.01.T06 | Sphingomyelin synthase-like domain containing protein                         |
| maker-1-augustus-gene-425.0-mRNA-1  | NA | NA     |           | Os01g0850800 | OsR498G0102340700.01.T01 | Laccase                                                                       |
| maker-1-augustus-gene-425.11-mRNA-1 | NA | NA     |           | Os01g0851400 | OsR498G0102343400.01.T01 | Ubiquitinyl hydrolase 1                                                       |
| maker-1-augustus-gene-425.13-mRNA-1 | NA | NA     |           | Os01g0851700 | OsR498G0102345000.01.T01 | Alpha-1,4 glucan phosphorylase                                                |
| maker-1-augustus-gene-425.19-mRNA-1 | NA | Indica | Kinase-TM | Os03g0825800 | OsR498G0102345600.01.T02 | Serine/threonine protein kinase                                               |
| maker-1-augustus-gene-425.2-mRNA-1  | NA | NA     |           | Os01g0851000 | OsR498G0102341500.01.T03 | Fructokinase-like protein 1, chloroplastic                                    |
| maker-1-augustus-gene-425.23-mRNA-1 | NA | Indica |           | Os01g0852200 | OsR498G0102346000.01.T01 | Anion transporter 4 like                                                      |
| maker-1-augustus-gene-425.4-mRNA-1  | NA | NA     |           | 0            | OsR498G0102341800.01.T01 | O-fucosyltransferase family protein (Fragment)                                |
| maker-1-augustus-gene-425.8-mRNA-1  | NA | NA     |           | Os01g0851300 | OsR498G0102343200.01.T02 | Reticulon domain-containing protein                                           |
| maker-1-augustus-gene-426.38-mRNA-1 | NA | NA     |           | Os01g0853400 | OsR498G0102350700.01.T02 | Coronatine-insensitive protein homolog 1b                                     |
| maker-1-augustus-gene-426.42-mRNA-1 | NA | NA     |           | Os01g0854400 | OsR498G0102355900.01.T01 |                                                                               |
| maker-1-augustus-gene-426.43-mRNA-1 | NA | Indica |           | Os01g0852500 | OsR498G0102348400.01.T03 | ELM2 domain-containing protein                                                |
| maker-1-augustus-gene-426.46-mRNA-1 | NA | NA     |           | Os01g0853000 | OsR498G0102349200.01.T01 | Putative pentatricopeptide repeat-containing protein                          |

|                                     |    |          |        |              |                          |                                                                             |
|-------------------------------------|----|----------|--------|--------------|--------------------------|-----------------------------------------------------------------------------|
| maker-1-augustus-gene-426.48-mRNA-1 | NA | NA       |        | Os01g0853700 | OsR498G0102352200.01.T01 | Transcription factor DIVARICATA                                             |
| maker-1-augustus-gene-426.50-mRNA-1 | NA | NA       |        | Os01g0854500 | OsR498G0102356600.01.T01 | Homeobox domain containing protein, expressed                               |
| maker-1-augustus-gene-427.24-mRNA-1 | NA | NA       |        | Os01g0855200 | OsR498G0102360100.01.T01 | Tetratricopeptide repeat (TPR)-like superfamily protein                     |
| maker-1-augustus-gene-427.26-mRNA-1 | NA | NA       |        | Os01g0855400 | OsR498G0102361100.01.T01 | Myb proto-oncogene protein-like                                             |
| maker-1-augustus-gene-427.28-mRNA-1 | NA | NA       |        | Os01g0856000 | OsR498G0102362900.01.T03 | Cell division control protein 6 homolog B                                   |
| maker-1-augustus-gene-427.31-mRNA-1 | NA | NA       |        | Os01g0855000 | OsR498G0102357800.01.T01 | Glycerol-3-phosphate 2-O-acyltransferase 6                                  |
| maker-1-augustus-gene-428.27-mRNA-1 | NA | NA       |        | Os01g0856500 | OsR498G0102366700.01.T01 | Auxin transporter-like protein 4 isoform A                                  |
| maker-1-augustus-gene-428.32-mRNA-1 | NA | NA       |        | Os01g0856900 | OsR498G0102367900.01.T01 | Alpha-amylase                                                               |
| maker-1-augustus-gene-428.34-mRNA-1 | NA | NA       |        | 0            | OsR498G0102369300.01.T02 | Nucleobase-ascorbate transporter like                                       |
| maker-1-augustus-gene-428.40-mRNA-1 | NA | NA       |        | 0            | OsR498G0102367000.01.T02 | Nuclear pore complex protein NUP62                                          |
| maker-1-augustus-gene-428.46-mRNA-1 | NA | NA       |        | Os01g0857000 | OsR498G0102368200.01.T03 | Protein-serine/threonine phosphatase                                        |
| maker-1-augustus-gene-428.51-mRNA-1 | NA | NA       |        | Os01g0857200 | OsR498G0102368400.01.T02 | Alkyl transferase                                                           |
| maker-1-augustus-gene-428.53-mRNA-1 | NA | NA       |        | 0            | OsR498G0102368600.01.T01 | probable 3-deoxy-D-manno-octulosonic acid transferase, mitochondrial        |
| maker-1-augustus-gene-428.59-mRNA-1 | NA | NA       |        | Os01g0857400 | OsR498G0102368800.01.T01 | GABA transporter 1                                                          |
| maker-1-augustus-gene-428.62-mRNA-1 | NA | Indica   |        | Os01g0857600 | OsR498G0102369600.01.T01 |                                                                             |
| maker-1-augustus-gene-429.0-mRNA-1  | NA | NA       |        | 0            | OsR498G0203524100.01.T01 | DNA excision repair protein like                                            |
| maker-1-augustus-gene-429.11-mRNA-1 | NA | NA       |        | Os01g0859200 | OsR498G0102374900.01.T05 | AB hydrolase-1 domain-containing protein                                    |
| maker-1-augustus-gene-429.14-mRNA-1 | NA | Indica   |        | Os01g0859300 | OsR498G0102377300.01.T01 | Abscisic acid insensitive 5 homologue                                       |
| maker-1-augustus-gene-429.16-mRNA-1 | NA | NA       |        | Os01g0859400 | OsR498G0102377500.01.T01 | Dual specificity protein phosphatase Diacylglycerol kinase catalytic region |
| maker-1-augustus-gene-429.19-mRNA-1 | NA | NA       |        | Os01g0858000 | OsR498G0102370200.01.T01 | AT hook motif-containing protein-like                                       |
| maker-1-augustus-gene-429.35-mRNA-1 | NA | NA       |        | Os01g0859100 |                          | Zinc finger protein WIP5                                                    |
| maker-1-augustus-gene-429.9-mRNA-1  | NA | NA       |        | Os01g0858700 | OsR498G0102372900.01.T01 | Nuclear transcription factor Y subunit alpha like                           |
| maker-1-augustus-gene-43.15-mRNA-1  | NA | NA       |        |              |                          | Ubiquitin-like domain-containing protein                                    |
| maker-1-augustus-gene-43.17-mRNA-1  | NA | NA       |        | Os11g0307600 | OsR498G1119899800.01.T01 | Protein kinase domain-containing protein                                    |
| maker-1-augustus-gene-43.8-mRNA-1   | NA | NA       |        | Os04g0354200 |                          | MULE domain-containing protein (Fragment)                                   |
| maker-1-augustus-gene-430.52-mRNA-1 | NA | NA       |        | Os01g0860400 | OsR498G0102379300.01.T01 | Acidic endochitinase                                                        |
| maker-1-augustus-gene-430.57-mRNA-1 | NA | NA       |        | Os01g0861400 | OsR498G0100480900.01.T01 |                                                                             |
| maker-1-augustus-gene-430.59-mRNA-1 | NA | NA       |        | Os01g0861700 | OsR498G0102383100.01.T01 | Hemerythrin domain-containing protein (Fragment)                            |
| maker-1-augustus-gene-430.62-mRNA-1 | NA | NA       |        | Os01g0862200 | OsR498G0102383900.01.T01 | Myb domain protein 3r-3                                                     |
| maker-1-augustus-gene-430.75-mRNA-1 | NA | NA       |        | Os01g0861900 | OsR498G0102383600.01.T01 | Transposon protein Mutator sub-class                                        |
| maker-1-augustus-gene-430.77-mRNA-1 | NA | Indica   |        | Os01g0862000 | OsR498G0102383800.01.T04 | AB hydrolase-1 domain-containing protein (Fragment)                         |
| maker-1-augustus-gene-431.0-mRNA-1  | NA | NA       |        | Os01g0862800 | OsR498G0102385500.01.T01 | NAC domain-containing protein 90                                            |
| maker-1-augustus-gene-431.12-mRNA-1 | NA | NA       |        | Os01g0863400 | OsR498G0102388200.01.T01 |                                                                             |
| maker-1-augustus-gene-431.2-mRNA-1  | NA | NA       |        | 0            | OsR498G0102386100.01.T01 |                                                                             |
| maker-1-augustus-gene-431.3-mRNA-1  | NA | Indica   |        | Os05g0442400 | OsR498G0102387900.01.T01 | Transcription factor DIVARICATA                                             |
| maker-1-augustus-gene-431.6-mRNA-1  | NA | NA       |        | Os01g0862300 | OsR498G0102384200.01.T01 | Sorting nexin-1                                                             |
| maker-1-augustus-gene-432.0-mRNA-1  | NA | NA       |        | Os01g0865600 | OsR498G0102396300.01.T01 | Transcription factor LHW like                                               |
| maker-1-augustus-gene-432.12-mRNA-1 | NA | NA       |        | Os01g0865100 | OsR498G0102395000.01.T01 | Uricase                                                                     |
| maker-1-augustus-gene-432.5-mRNA-1  | NA | Indica   |        | Os01g0864000 | OsR498G0102390000.01.T01 | Transcription repressor                                                     |
| maker-1-augustus-gene-432.6-mRNA-1  | NA | NA       | Kinase | 0            | OsR498G0102391800.01.T03 | Serine/threonine-protein kinase Nek5                                        |
| maker-1-augustus-gene-433.0-mRNA-1  | NA | Indica   |        | Os05g0438800 | OsR498G0102400100.01.T02 | Actin-7                                                                     |
| maker-1-augustus-gene-433.12-mRNA-1 | NA | NA       |        | Os01g0866800 | OsR498G0102403100.01.T05 | Tubby-like F-box protein 14                                                 |
| maker-1-augustus-gene-433.18-mRNA-1 | NA | Indica   |        | Os07g0675400 | OsR498G0102403500.01.T04 | Tyrosyl-tRNA synthetase                                                     |
| maker-1-augustus-gene-433.2-mRNA-1  | NA | NA       |        | Os01g0866300 | OsR498G0102400700.01.T04 | SNARE protein YKT6, synaptobrevin/VAMP syperfamily                          |
| maker-1-augustus-gene-433.21-mRNA-1 | NA | NA       |        | Os01g0867200 | OsR498G0102403700.01.T03 | Putative wd repeat-containing protein-like                                  |
| maker-1-augustus-gene-433.26-mRNA-1 | NA | NA       |        | Os01g0867600 | OsR498G0102404900.01.T01 | Sterol 3-beta-glucosyltransferase                                           |
| maker-1-augustus-gene-433.33-mRNA-1 | NA | NA       |        | Os01g0867700 | OsR498G0102405100.01.T01 |                                                                             |
| maker-1-augustus-gene-433.35-mRNA-1 | NA | NA       |        | Os01g0867800 | OsR498G0102405300.01.T10 | Polypyrimidine tract-binding protein like 3                                 |
| maker-1-augustus-gene-433.40-mRNA-1 | NA | NA       |        | Os01g0866500 | OsR498G0102401200.01.T02 | Inorganic diphosphatase                                                     |
| maker-1-augustus-gene-433.43-mRNA-1 | NA | NA       |        | Os01g0866600 | OsR498G0102401600.01.T01 | Sm domain-containing protein                                                |
| maker-1-augustus-gene-433.45-mRNA-1 | NA | NA       |        | Os01g0866700 | OsR498G0102401800.01.T01 | U6 snRNA-associated Sm-like protein LSM3                                    |
| maker-1-augustus-gene-433.48-mRNA-1 | NA | NA       |        | Os01g0867300 | OsR498G0102404000.01.T03 | G-box-binding factor 4                                                      |
| maker-1-augustus-gene-433.52-mRNA-1 | NA | NA       |        | Os01g0867900 | OsR498G0102405600.01.T01 | Membrane protein COV-like                                                   |
| maker-1-augustus-gene-433.56-mRNA-1 | NA | Japonica |        | Os01g0868000 | OsR498G0102406000.01.T01 | Ethylene-responsive transcription factor                                    |
| maker-1-augustus-gene-433.7-mRNA-1  | NA | NA       |        | Os01g0866400 | OsR498G0102409000.01.T01 | D-fructose-1,6-bisphosphate 1-phosphohydrolase                              |
| maker-1-augustus-gene-434.36-mRNA-1 | NA | NA       |        | 0            | OsR498G0102408700.01.T01 | Peptidase A1 domain-containing protein                                      |
| maker-1-augustus-gene-434.37-mRNA-1 | NA | NA       |        | Os01g0869200 | OsR498G0102410700.01.T01 | Magnesium transporter                                                       |
| maker-1-augustus-gene-434.39-mRNA-1 | NA | NA       |        | Os01g0869600 | OsR498G0102412100.01.T01 | TLC domain-containing protein 2                                             |
| maker-1-augustus-gene-434.42-mRNA-1 | NA | NA       |        | Os01g0869800 | OsR498G0102412300.01.T01 | Photosystem II protein, chloroplastic                                       |
| maker-1-augustus-gene-434.45-mRNA-1 | NA | NA       |        |              |                          | S-acyltransferase                                                           |
| maker-1-augustus-gene-434.50-mRNA-1 | NA | NA       |        |              |                          | DNA polymerase alpha catalytic subunit                                      |

|                                     |    |          |           |              |                          |                                                                                       |
|-------------------------------------|----|----------|-----------|--------------|--------------------------|---------------------------------------------------------------------------------------|
| maker-1-augustus-gene-434.56-mRNA-1 | NA | NA       |           | Os01g0869000 | OsR498G0102410200.01.T01 |                                                                                       |
| maker-1-augustus-gene-434.61-mRNA-1 | NA | Indica   |           | Os07g0232900 | OsR498G0102410400.01.T01 | Cadmium/zinc-transporting ATPase HMA2                                                 |
| maker-1-augustus-gene-434.63-mRNA-1 | NA | NA       |           |              |                          |                                                                                       |
| maker-1-augustus-gene-434.68-mRNA-1 | NA | NA       |           | Os01g0869500 | OsR498G0102412000.01.T01 | AUGMIN subunit like                                                                   |
| maker-1-augustus-gene-435.13-mRNA-1 | NA | NA       |           | 0            | OsR498G0102414500.01.T04 | DNA repair protein XRCC                                                               |
| maker-1-augustus-gene-435.15-mRNA-1 | NA | NA       |           | Os01g0870300 | OsR498G0102414500.01.T06 | Ammonium transporter                                                                  |
| maker-1-augustus-gene-435.17-mRNA-1 | NA | NA       |           |              |                          | AB hydrolase-1 domain-containing protein (Fragment)                                   |
| maker-1-augustus-gene-435.24-mRNA-1 | NA | NA       |           | Os01g0871300 | OsR498G0102417100.01.T01 | Glutamate-oxaloacetate transaminase4                                                  |
| maker-1-augustus-gene-435.28-mRNA-1 | NA | NA       |           | Os01g0871500 | OsR498G0102418100.01.T03 | Peptide/nitrate transporter                                                           |
| maker-1-augustus-gene-435.32-mRNA-1 | NA | NA       |           | Os01g0870100 | OsR498G0102414000.01.T01 | Ion channel POLLUX like                                                               |
| maker-1-augustus-gene-435.37-mRNA-1 | NA | Indica   | Kinase-TM | Os01g0889900 | OsR498G0102414800.01.T01 | Receptor-like serine/threonine-protein kinase                                         |
| maker-1-augustus-gene-435.39-mRNA-1 | NA | NA       | Kinase-TM | 0            | OsR498G0102415600.01.T01 | Non-specific serine/threonine protein kinase (Fragment)                               |
| maker-1-augustus-gene-435.7-mRNA-1  | NA | Indica   |           | Os02g0688900 | OsR498G0102414300.01.T01 | Phosphatidylinositol glycan anchor biosynthesis class U protein                       |
| maker-1-augustus-gene-436.47-mRNA-1 | NA | NA       |           | Os01g0871600 | OsR498G0102418700.01.T01 | Peptide/nitrate transporter                                                           |
| maker-1-augustus-gene-436.50-mRNA-1 | NA | Indica   |           | Os01g0872100 | OsR498G0102418900.01.T01 | Peptide transporter PTR2                                                              |
| maker-1-augustus-gene-436.52-mRNA-1 | NA | NA       |           | Os01g0871800 | OsR498G0102419100.01.T01 | CRIB domain-containing protein                                                        |
| maker-1-augustus-gene-436.54-mRNA-1 | NA | Japonica |           | Os01g0871900 | OsR498G0102420300.01.T02 | Peptide transporter PTR5                                                              |
| maker-1-augustus-gene-436.57-mRNA-1 | NA | NA       |           | Os01g0872100 | OsR498G0102420300.01.T02 | Peptide transporter PTR5                                                              |
| maker-1-augustus-gene-436.60-mRNA-1 | NA | Indica   |           | Os01g0871800 | OsR498G0102420700.01.T01 | Peptide transporter PTR2                                                              |
| maker-1-augustus-gene-436.62-mRNA-1 | NA | Indica   |           | Os01g0872000 | OsR498G0102420900.01.T01 | Putative proton-dependent oligopeptide or low-affinity nitrate transporter (Fragment) |
| maker-1-augustus-gene-436.67-mRNA-1 | NA | NA       |           | 0            | OsR498G0102421700.01.T01 | CRIB domain-containing protein                                                        |
| maker-1-augustus-gene-436.70-mRNA-1 | NA | NA       |           | 0            | OsR498G0102422100.01.T01 | ROP-interactive CRIB motif-containing protein 10                                      |
| maker-1-augustus-gene-436.72-mRNA-1 | NA | NA       |           | Os01g0872700 | OsR498G0102422400.01.T01 | 5'-3' exoribonuclease                                                                 |
| maker-1-augustus-gene-436.78-mRNA-1 | NA | NA       | Kinase    | Os01g0872800 | OsR498G0102422600.01.T01 | Non-specific serine/threonine protein kinase                                          |
| maker-1-augustus-gene-437.10-mRNA-1 | NA | NA       |           | Os01g0874900 | OsR498G0102433100.01.T01 | Glycine hydroxymethyltransferase                                                      |
| maker-1-augustus-gene-437.13-mRNA-1 | NA | NA       |           | Os01g0873800 | OsR498G0102425600.01.T01 | Erythroid differentiation-related factor 1                                            |
| maker-1-augustus-gene-437.17-mRNA-1 | NA | Indica   |           | Os05g0430300 | OsR498G0102426200.01.T01 | Zinc finger protein Pegasus                                                           |
| maker-1-augustus-gene-437.22-mRNA-1 | NA | Indica   |           | Os01g0874100 | OsR498G0102428000.01.T01 | dNK domain-containing protein (Fragment)                                              |
| maker-1-augustus-gene-437.25-mRNA-1 | NA | NA       |           | Os01g0874800 | OsR498G0102432600.01.T02 | 53EXOc domain-containing protein (Fragment)                                           |
| maker-1-augustus-gene-437.27-mRNA-1 | NA | NA       |           | Os01g0875000 | OsR498G0102433600.01.T01 | Transposable element protein, putative, MuDR                                          |
| maker-1-augustus-gene-437.5-mRNA-1  | NA | NA       |           | Os01g0874300 | OsR498G0102429100.01.T01 | Transcription repressor MYB4                                                          |
| maker-1-augustus-gene-437.7-mRNA-1  | NA | NA       |           | Os01g0874700 | OsR498G0102431700.01.T01 | SEC14 cytosolic factor family protein / phosphoglyceride transfer family protein      |
| maker-1-augustus-gene-438.0-mRNA-1  | NA | NA       |           | Os01g0875300 | OsR498G0102435700.01.T01 | Usp domain-containing protein (Fragment)                                              |
| maker-1-augustus-gene-438.11-mRNA-1 | NA | Indica   |           | Os08g0300300 | OsR498G0102438100.01.T01 | Chloride channel protein CLC-c                                                        |
| maker-1-augustus-gene-438.13-mRNA-1 | NA | Japonica |           | Os01g0876500 | OsR498G0102439100.01.T04 | Splicing factor U2af large subunit A                                                  |
| maker-1-augustus-gene-438.18-mRNA-1 | NA | NA       |           | Os01g0875400 | OsR498G0102436000.01.T02 | Nuclear proteasome inhibitor UBLCP1                                                   |
| maker-1-augustus-gene-438.22-mRNA-1 | NA | NA       |           | Os01g0875800 | OsR498G0102437800.01.T01 | Peroxisomal protein 5, mitochondrial                                                  |
| maker-1-augustus-gene-438.24-mRNA-1 | NA | NA       |           | Os01g0876400 | OsR498G0102439000.01.T01 | Galactose-binding protein isoform 1                                                   |
| maker-1-augustus-gene-438.28-mRNA-1 | NA | NA       |           | Os01g0876900 | OsR498G0102441200.01.T02 | SnRK1-interacting protein 1                                                           |
| maker-1-augustus-gene-438.4-mRNA-1  | NA | NA       |           |              |                          | SUEL-type lectin domain-containing protein                                            |
| maker-1-augustus-gene-438.9-mRNA-1  | NA | NA       |           | Os01g0875700 | OsR498G0102437500.01.T01 | J domain-containing protein (Fragment)                                                |
| maker-1-augustus-gene-439.0-mRNA-1  | NA | NA       |           | Os01g0877300 | OsR498G0102441700.01.T01 | Mitotic spindle assembly checkpoint protein MAD1                                      |
| maker-1-augustus-gene-439.15-mRNA-1 | NA | NA       |           | Os01g0878000 | OsR498G0102444800.01.T02 | Protein GLUTAMINE DUMPER like                                                         |
| maker-1-augustus-gene-439.17-mRNA-1 | NA | NA       |           | Os01g0878400 | OsR498G0102446400.01.T01 | Amino acid transporter                                                                |
| maker-1-augustus-gene-439.19-mRNA-1 | NA | NA       |           | Os01g0878700 | OsR498G0102447200.01.T02 | Amino acid transporter                                                                |
| maker-1-augustus-gene-439.21-mRNA-1 | NA | NA       |           | Os01g0878800 | OsR498G0102447400.01.T01 | LigB domain-containing protein (Fragment)                                             |
| maker-1-augustus-gene-439.23-mRNA-1 | NA | NA       |           | Os01g0878900 | OsR498G0102447600.01.T02 | LigB domain-containing protein (Fragment)                                             |
| maker-1-augustus-gene-439.25-mRNA-1 | NA | NA       |           | 0            | OsR498G0102448800.01.T01 | N-llysine methyltransferase                                                           |
| maker-1-augustus-gene-439.4-mRNA-1  | NA | NA       |           | Os01g0877400 | OsR498G0102441900.01.T01 | Hexosyltransferase                                                                    |
| maker-1-augustus-gene-439.7-mRNA-1  | NA | NA       |           | Os01g0877500 | OsR498G0102442700.01.T01 | PHD domain-containing protein                                                         |
| maker-1-augustus-gene-44.0-mRNA-1   | NA | NA       |           | Os01g0182100 | OsR498G0100277300.01.T01 |                                                                                       |
| maker-1-augustus-gene-44.5-mRNA-1   | NA | NA       |           | 0            | OsR498G0100281900.01.T04 | Spatacsin                                                                             |
| maker-1-augustus-gene-440.34-mRNA-1 | NA | NA       |           | 0            | OsR498G0102449300.01.T01 | Fidgetin-like protein 1                                                               |
| maker-1-augustus-gene-440.36-mRNA-1 | NA | NA       |           | Os01g0880200 | OsR498G0102453500.01.T01 | Hexosyltransferase                                                                    |
| maker-1-augustus-gene-440.39-mRNA-1 | NA | NA       |           | Os01g0880800 | OsR498G0102454900.01.T01 | Stearoyl-[acyl-carrier-protein] 9-desaturase 1, chloroplastic                         |
| maker-1-augustus-gene-440.41-mRNA-1 | NA | NA       |           | Os01g0880300 | OsR498G0102454200.01.T01 | Pectinesterase                                                                        |
| maker-1-augustus-gene-440.43-mRNA-1 | NA | NA       |           | Os01g0880400 | OsR498G0102454400.01.T03 | Protein trichome birefringence-like 7                                                 |
| maker-1-augustus-gene-440.46-mRNA-1 | NA | NA       |           | Os01g0881000 | OsR498G0102455200.01.T01 | CHD3-type chromatin-remodeling factor PICKLE                                          |
| maker-1-augustus-gene-441.46-mRNA-1 | NA | NA       |           | Os01g0881300 | OsR498G0102458300.01.T01 | Bidirectional sugar transporter SWEET                                                 |
| maker-1-augustus-gene-441.51-mRNA-1 | NA | Indica   |           | Os01g0881400 | OsR498G0102458500.01.T01 | DRMBL domain-containing protein                                                       |
| maker-1-augustus-gene-441.54-mRNA-1 | NA | Indica   |           | Os01g0882100 | OsR498G0102460500.01.T01 | 4HBT domain-containing protein (Fragment)                                             |

|                                     |    |          |           |              |                          |                                                                      |
|-------------------------------------|----|----------|-----------|--------------|--------------------------|----------------------------------------------------------------------|
| maker-1-augustus-gene-441.57-mRNA-1 | NA | NA       |           | Os01g0882300 | OsR498G0102462100.01.T03 | Probable magnesium transporter                                       |
| maker-1-augustus-gene-441.62-mRNA-1 | NA | NA       |           | 0            | OsR498G0102463900.01.T01 | HUN domain-containing protein                                        |
| maker-1-augustus-gene-441.69-mRNA-1 | NA | NA       |           | Os01g0881500 | OsR498G0102459000.01.T01 | Scarecrow-like protein 1                                             |
| maker-1-augustus-gene-441.71-mRNA-1 | NA | NA       |           | Os01g0881900 | OsR498G0102460200.01.T04 | F-box protein SKP2A                                                  |
| maker-1-augustus-gene-441.74-mRNA-1 | NA | NA       | Kinase-TM | 0            | OsR498G0102460400.01.T03 | probable serine/threonine-protein kinase PBL16                       |
| maker-1-augustus-gene-441.78-mRNA-1 | NA | NA       |           | Os06g0265400 | OsR498G0612061600.01.T03 | Basic-leucine zipper domain                                          |
| maker-1-augustus-gene-441.80-mRNA-1 | NA | NA       |           | Os01g0882500 | OsR498G0102462400.01.T01 | NADH dehydrogenase I subunit N                                       |
| maker-1-augustus-gene-441.82-mRNA-1 | NA | NA       |           | Os01g0882800 | OsR498G0102462800.01.T01 | Amino acid permease                                                  |
| maker-1-augustus-gene-441.84-mRNA-1 | NA | Japonica |           | Os01g0883100 | OsR498G0102463400.01.T04 | MADS-box transcription factor 2                                      |
| maker-1-augustus-gene-442.27-mRNA-1 | NA | NA       |           | Os01g0883800 | OsR498G0102466500.01.T01 | Gibberellin 20 oxidase 2                                             |
| maker-1-augustus-gene-442.29-mRNA-1 | NA | NA       |           | Os01g0884400 | OsR498G0102469100.01.T01 | RING-type E3 ubiquitin transferase                                   |
| maker-1-augustus-gene-442.32-mRNA-1 | NA | Indica   |           | Os01g0885000 | OsR498G0102470900.01.T02 | Cytochrome c, class IA/ IB                                           |
| maker-1-augustus-gene-442.35-mRNA-1 | NA | NA       |           | Os01g0883900 | OsR498G0102466800.01.T02 | Putative methyltransferase PMT25                                     |
| maker-1-augustus-gene-442.40-mRNA-1 | NA | NA       |           | Os01g0884300 | OsR498G0102467600.01.T01 | NAC transcription factor                                             |
| maker-1-augustus-gene-442.43-mRNA-1 | NA | NA       |           | Os01g0884500 | OsR498G0102469400.01.T04 | Plus3 domain-containing protein                                      |
| maker-1-augustus-gene-442.50-mRNA-1 | NA | NA       |           | Os01g0884700 | OsR498G0102470200.01.T01 | Plus3 domain-containing protein                                      |
| maker-1-augustus-gene-442.53-mRNA-1 | NA | NA       |           | 0            | OsR498G0102470400.01.T02 | TVP38/TMEM64 family membrane protein like                            |
| maker-1-augustus-gene-443.13-mRNA-1 | NA | Indica   |           | Os05g0419200 | OsR498G0102478500.01.T01 | Protein root UVB sensitive 6                                         |
| maker-1-augustus-gene-443.18-mRNA-1 | NA | NA       |           | 0            | OsR498G0102478700.01.T01 | 4-diphosphocytidyl-2C-methyl-D-erythritol synthase                   |
| maker-1-augustus-gene-443.24-mRNA-1 | NA | NA       |           | Os01g0885300 | OsR498G0102472000.01.T04 | TPX2 (Targeting protein for Xklp2) protein family                    |
| maker-1-augustus-gene-443.27-mRNA-1 | NA | NA       |           | 0            | OsR498G0102473200.01.T04 | SMAP domain-containing protein                                       |
| maker-1-augustus-gene-443.29-mRNA-1 | NA | NA       |           | Os01g0886000 | OsR498G0102475000.01.T01 | Electron transporter                                                 |
| maker-1-augustus-gene-443.31-mRNA-1 | NA | NA       |           | Os03g0615700 | OsR498G0613178300.01.T01 | GRF zinc finger family protein, expressed                            |
| maker-1-augustus-gene-443.33-mRNA-1 | NA | NA       |           | Os01g0886500 | OsR498G0102477400.01.T04 | keratin, type II cytoskeletal 3                                      |
| maker-1-augustus-gene-443.35-mRNA-1 | NA | Indica   |           | Os01g0886600 | OsR498G0102477600.01.T01 | AAA+ ATPase domain                                                   |
| maker-1-augustus-gene-443.5-mRNA-1  | NA | Japonica |           | Os01g0886200 | OsR498G0102475700.01.T01 | AGAMOUS-like protein 2                                               |
| maker-1-augustus-gene-443.9-mRNA-1  | NA | NA       |           | Os01g0886300 | OsR498G0102477100.01.T07 | RNA-binding KH domain-containing protein isoform 1                   |
| maker-1-augustus-gene-444.32-mRNA-1 | NA | NA       |           |              |                          |                                                                      |
| maker-1-augustus-gene-444.35-mRNA-1 | NA | NA       |           | Os01g0888300 | OsR498G0102483900.01.T01 | NAC transcription factor                                             |
| maker-1-augustus-gene-444.37-mRNA-1 | NA | NA       |           | Os01g0888600 | OsR498G0102485100.01.T01 |                                                                      |
| maker-1-augustus-gene-444.40-mRNA-1 | NA | NA       |           | 0            | OsR498G0102479000.01.T01 | Class I peptide chain release factor                                 |
| maker-1-augustus-gene-444.43-mRNA-1 | NA | NA       |           | Os01g0887700 | OsR498G0102480200.01.T01 | PHD finger protein ALFIN-LIKE 6                                      |
| maker-1-augustus-gene-444.47-mRNA-1 | NA | NA       |           | Os01g0888700 | OsR498G0102485400.01.T01 | Non-specific serine/threonine protein kinase                         |
| maker-1-augustus-gene-445.0-mRNA-1  | NA | NA       |           | Os01g0889000 | OsR498G0102486500.01.T01 | Signal recognition particle subunit SRP72                            |
| maker-1-augustus-gene-445.11-mRNA-1 | NA | NA       |           | 0            | OsR498G0102491300.01.T03 | TPR repeat-containing protein ZIP4                                   |
| maker-1-augustus-gene-445.15-mRNA-1 | NA | NA       |           | Os01g0889200 | OsR498G0102487400.01.T06 | DNA-directed RNA polymerase III subunit rpc4-like                    |
| maker-1-augustus-gene-445.20-mRNA-1 | NA | NA       |           |              |                          |                                                                      |
| maker-1-augustus-gene-445.22-mRNA-1 | NA | NA       |           | Os01g0889800 | OsR498G0102488600.01.T02 | rhodanese-like domain-containing protein 4A, chloroplastic           |
| maker-1-augustus-gene-445.24-mRNA-1 | NA | NA       | Kinase-TM | Os01g0889900 | OsR498G0102488800.01.T01 | Receptor-like serine/threonine-protein kinase                        |
| maker-1-augustus-gene-445.26-mRNA-1 | NA | NA       |           |              |                          |                                                                      |
| maker-1-augustus-gene-445.28-mRNA-1 | NA | NA       |           | Os01g0890300 |                          | DDE Tnp4 domain-containing protein                                   |
| maker-1-augustus-gene-445.30-mRNA-1 | NA | NA       |           | Os01g0891000 | OsR498G0102491600.01.T02 | Beta-N-acetylhexosaminidase                                          |
| maker-1-augustus-gene-445.6-mRNA-1  | NA | Indica   | Kinase-TM | Os01g0890600 | OsR498G0102489700.01.T01 | Non-specific serine/threonine protein kinase (Fragment)              |
| maker-1-augustus-gene-445.8-mRNA-1  | NA | NA       |           | 0            | OsR498G0102490500.01.T01 | Receptor-like serine/threonine-protein kinase                        |
| maker-1-augustus-gene-445.9-mRNA-1  | NA | Indica   | Kinase-TM | Os01g0890600 | OsR498G0102491100.01.T02 | Receptor-like serine/threonine-protein kinase                        |
| maker-1-augustus-gene-446.47-mRNA-1 | NA | NA       |           | Os01g0891100 | OsR498G0102492100.01.T01 | Endo-polygalacturonase                                               |
| maker-1-augustus-gene-446.48-mRNA-1 | NA | NA       |           | Os01g0891300 | OsR498G0102492500.01.T01 | NADPH-dependent double-bond reductase 3 variant 1                    |
| maker-1-augustus-gene-446.55-mRNA-1 | NA | Indica   |           | Os01g0892200 | OsR498G0102495900.01.T01 | Receptor protein kinase-like                                         |
| maker-1-augustus-gene-446.63-mRNA-1 | NA | NA       |           | 0            | OsR498G0407890700.01.T01 |                                                                      |
| maker-1-augustus-gene-446.68-mRNA-1 | NA | NA       |           | Os09g0258800 |                          | Ulp1 protease family, C-terminal catalytic domain containing protein |
| maker-1-augustus-gene-446.70-mRNA-1 | NA | NA       |           | Os01g0661400 | OsR498G0102492800.01.T03 | Ribosomal RNA-processing protein 40                                  |
| maker-1-augustus-gene-446.74-mRNA-1 | NA | Indica   |           | Os01g0892600 | OsR498G0102496800.01.T01 | Pectin acetyltransferase                                             |
| maker-1-augustus-gene-446.79-mRNA-1 | NA | Indica   |           | Os01g0892600 | OsR498G0102497400.01.T01 | Pectin acetyltransferase                                             |
| maker-1-augustus-gene-446.84-mRNA-1 | NA | NA       |           | Os01g0892600 | OsR498G0102497600.01.T02 | Pectin acetyltransferase                                             |
| maker-1-augustus-gene-446.87-mRNA-1 | NA | NA       |           |              |                          | Far-red impaired response-like                                       |
| maker-1-augustus-gene-447.44-mRNA-1 | NA | NA       |           | Os01g0893400 | OsR498G0102500100.01.T01 | Btbpoz and taz domain-containing protein 3                           |
| maker-1-augustus-gene-447.48-mRNA-1 | NA | NA       |           | Os01g0894000 | OsR498G0102501300.01.T02 | Metallophos domain-containing protein (Fragment)                     |
| maker-1-augustus-gene-447.51-mRNA-1 | NA | NA       |           | Os01g0894500 | OsR498G0102502500.01.T03 | Selenoprotein F                                                      |
| maker-1-augustus-gene-447.53-mRNA-1 | NA | NA       |           |              |                          |                                                                      |
| maker-1-augustus-gene-447.55-mRNA-1 | NA | NA       |           | Os01g0895200 | OsR498G0102504300.01.T01 | Putative DOMON domain, cytochrome b561/ferric reductase transmembran |
| maker-1-augustus-gene-447.57-mRNA-1 | NA | Indica   |           | Os01g0895300 | OsR498G0102505100.01.T01 | Cytochrome b561 domain-containing protein (Fragment)                 |

|                                     |    |          |           |              |                          |                                                                            |
|-------------------------------------|----|----------|-----------|--------------|--------------------------|----------------------------------------------------------------------------|
| maker-1-augustus-gene-447.65-mRNA-1 | NA | NA       |           | 0            | OsR498G0102500400.01.T01 |                                                                            |
| maker-1-augustus-gene-447.67-mRNA-1 | NA | NA       |           | Os01g0893700 | OsR498G0102500600.01.T01 | DOMON domain-containing protein                                            |
| maker-1-augustus-gene-447.69-mRNA-1 | NA | NA       |           | Os01g0894300 | OsR498G0102501800.01.T01 | Putative fructokinase-2                                                    |
| maker-1-augustus-gene-447.74-mRNA-1 | NA | NA       |           | Os01g0894600 | OsR498G0102502800.01.T04 | RING-CH-type domain-containing protein                                     |
| maker-1-augustus-gene-447.78-mRNA-1 | NA | NA       |           | Os01g0894700 |                          | Trigger factor                                                             |
| maker-1-augustus-gene-447.81-mRNA-1 | NA | NA       |           | Os01g0895100 | OsR498G0102504200.01.T01 | Membrane-associated protein VIPP1 chloroplastic                            |
| maker-1-augustus-gene-447.84-mRNA-1 | NA | Indica   |           | Os05g0507300 | OsR498G0102505800.01.T01 | Calreticulin/calnexin                                                      |
| maker-1-augustus-gene-448.0-mRNA-1  | NA | Indica   |           | Os01g0896300 | OsR498G0102506100.01.T02 | Chromatin assembly factor 1 subunit FSM                                    |
| maker-1-augustus-gene-448.11-mRNA-1 | NA | NA       |           | Os01g0897100 | OsR498G0102507700.01.T02 | Heat stress transcription factor B-1                                       |
| maker-1-augustus-gene-448.18-mRNA-1 | NA | NA       |           | Os01g0896500 | OsR498G0102506400.01.T03 | Rhodanese domain-containing protein                                        |
| maker-1-augustus-gene-448.21-mRNA-1 | NA | NA       |           |              |                          |                                                                            |
| maker-1-augustus-gene-448.23-mRNA-1 | NA | NA       | Kinase    | 0            | OsR498G0102507600.01.T01 | Cell division control protein 2                                            |
| maker-1-augustus-gene-448.27-mRNA-1 | NA | NA       |           | Os01g0897200 | OsR498G0102508000.01.T03 | Ribonuclease 2                                                             |
| maker-1-augustus-gene-448.3-mRNA-1  | NA | NA       |           | Os01g0896800 | OsR498G0102506700.01.T01 | 60S ribosomal protein L5-1 homolog a                                       |
| maker-1-augustus-gene-448.31-mRNA-1 | NA | Indica   |           | Os01g0897300 | OsR498G0102508400.01.T02 | Ribonuclease 2                                                             |
| maker-1-augustus-gene-448.34-mRNA-1 | NA | NA       |           | 0            | OsR498G0102509600.01.T01 | Formin-like protein 1                                                      |
| maker-1-augustus-gene-448.36-mRNA-1 | NA | NA       |           | Os01g0897800 | OsR498G0102511200.01.T04 | Sister chromatid cohesion 1 protein 4                                      |
| maker-1-augustus-gene-448.42-mRNA-1 | NA | NA       |           | 0            | OsR498G0102511800.01.T01 |                                                                            |
| maker-1-augustus-gene-448.7-mRNA-1  | NA | NA       |           | Os01g0896800 | OsR498G0102506900.01.T01 | 60S ribosomal protein L5-1 homolog a                                       |
| maker-1-augustus-gene-449.24-mRNA-1 | NA | NA       |           | Os01g0898400 | OsR498G0102513500.01.T02 |                                                                            |
| maker-1-augustus-gene-449.28-mRNA-1 | NA | NA       |           | Os01g0898500 | OsR498G0102513700.01.T01 | Patatin                                                                    |
| maker-1-augustus-gene-449.31-mRNA-1 | NA | NA       |           | Os01g0898800 | OsR498G0102514700.01.T02 | Zygote defective protein 12 (Fragment)                                     |
| maker-1-augustus-gene-449.33-mRNA-1 | NA | NA       |           | Os01g0898900 | OsR498G0102514900.01.T04 | Nucleotide-sugar transporter                                               |
| maker-1-augustus-gene-449.38-mRNA-1 | NA | NA       |           | Os01g0899100 | OsR498G0102515500.01.T01 |                                                                            |
| maker-1-augustus-gene-449.40-mRNA-1 | NA | NA       |           | Os01g0898300 | OsR498G0102513000.01.T01 | ARM repeat superfamily protein                                             |
| maker-1-augustus-gene-449.46-mRNA-1 | NA | NA       |           | Os01g0898600 | OsR498G0102514000.01.T01 |                                                                            |
| maker-1-augustus-gene-449.48-mRNA-1 | NA | NA       | Kinase-TM | Os01g0899000 | OsR498G0102515200.01.T03 | Tyrosine-protein kinase                                                    |
| maker-1-augustus-gene-449.52-mRNA-1 | NA | NA       |           |              |                          | Methyltransferase                                                          |
| maker-1-augustus-gene-449.56-mRNA-1 | NA | NA       |           | Os01g0899500 | OsR498G0102518200.01.T04 | Pentatricopeptide repeat superfamily protein isoform 1                     |
| maker-1-augustus-gene-449.61-mRNA-1 | NA | NA       |           | Os01g0899700 | OsR498G0102518400.01.T01 | Extensin repeat-containing protein                                         |
| maker-1-augustus-gene-449.63-mRNA-1 | NA | Indica   |           | Os01g0899800 | OsR498G0102518800.01.T01 | AP2-like ethylene-responsive transcription factor BBM2                     |
| maker-1-augustus-gene-45.45-mRNA-1  | NA | Japonica |           | Os01g0183000 | OsR498G0511247700.01.T02 | Choline/ethanolamine kinase                                                |
| maker-1-augustus-gene-45.47-mRNA-1  | NA | NA       |           |              |                          | Transposon protein, putative, Mutator sub-class, expressed                 |
| maker-1-augustus-gene-45.51-mRNA-1  | NA | NA       |           | Os01g0183100 | OsR498G0100282100.01.T01 | probable U3 small nucleolar RNA-associated protein 7                       |
| maker-1-augustus-gene-45.70-mRNA-1  | NA | NA       |           | Os01g0183300 | OsR498G0100282600.01.T01 | Type IV inositol polyphosphate 5-phosphatase 3                             |
| maker-1-augustus-gene-450.0-mRNA-1  | NA | NA       |           | 0            | OsR498G0102520500.01.T01 | Sn1-specific diacylglycerol lipase alpha                                   |
| maker-1-augustus-gene-450.11-mRNA-1 | NA | NA       |           | Os01g0900900 | OsR498G0102525600.01.T02 | OTU domain-containing protein isoform A                                    |
| maker-1-augustus-gene-450.15-mRNA-1 | NA | NA       |           | Os01g0901000 | OsR498G0102526000.01.T03 | RING-type E3 ubiquitin transferase                                         |
| maker-1-augustus-gene-450.19-mRNA-1 | NA | NA       |           | Os01g0901200 | OsR498G0102527000.01.T01 | DNA repair protein recA                                                    |
| maker-1-augustus-gene-450.7-mRNA-1  | NA | NA       |           | Os01g0900800 | OsR498G0102525300.01.T01 | Flowering BHLH 1                                                           |
| maker-1-augustus-gene-451.0-mRNA-1  | NA | NA       |           | 0            | OsR498G0102527100.01.T02 | GDP-L-galactose phosphorylase                                              |
| maker-1-augustus-gene-451.10-mRNA-1 | NA | NA       |           | 0            | OsR498G0102528100.01.T01 | FAD/NAD(P)-binding oxidoreductase family protein                           |
| maker-1-augustus-gene-451.16-mRNA-1 | NA | NA       |           | Os01g0902200 | OsR498G0102529300.01.T01 | Thimet oligopeptidase                                                      |
| maker-1-augustus-gene-451.17-mRNA-1 | NA | NA       |           | Os01g0902200 | OsR498G0102529300.01.T04 | Thimet oligopeptidase                                                      |
| maker-1-augustus-gene-451.28-mRNA-1 | NA | Indica   |           | Os01g0902800 | OsR498G0102530100.01.T01 | Peptide transporter 1                                                      |
| maker-1-augustus-gene-451.30-mRNA-1 | NA | NA       |           | Os01g0902800 | OsR498G0102530300.01.T01 | Peptide transporter                                                        |
| maker-1-augustus-gene-451.34-mRNA-1 | NA | NA       |           | Os01g0901800 | OsR498G0102528400.01.T02 | Putative membrane protein YuiD                                             |
| maker-1-augustus-gene-451.38-mRNA-1 | NA | Indica   |           | Os01g0901900 | OsR498G0102528600.01.T01 | Protein PLASTID TRANSCRIPTIONALLY ACTIVE 10 like                           |
| maker-1-augustus-gene-451.44-mRNA-1 | NA | NA       |           | 0            | OsR498G0102529000.01.T01 | Multidrug resistance-associated protein/mitoxantrone resistance protein, A |
| maker-1-augustus-gene-451.5-mRNA-1  | NA | NA       |           | 0            | OsR498G0102527700.01.T03 | 4-coumarate--CoA ligase-like 9                                             |
| maker-1-augustus-gene-451.50-mRNA-1 | NA | NA       |           | Os01g0902300 | OsR498G0102529600.01.T01 | Esterase, putative, expressed                                              |
| maker-1-augustus-gene-451.7-mRNA-1  | NA | NA       |           | 0            | OsR498G0102527900.01.T01 | 4-coumarate--CoA ligase-like 9 isoform A                                   |
| maker-1-augustus-gene-452.0-mRNA-1  | NA | Indica   |           | Os01g0904300 | OsR498G0102533100.01.T01 | DUF971 domain-containing protein (Fragment)                                |
| maker-1-augustus-gene-452.12-mRNA-1 | NA | NA       |           | 0            | OsR498G0102532800.01.T01 |                                                                            |
| maker-1-augustus-gene-452.14-mRNA-1 | NA | NA       |           | Os01g0904200 | OsR498G0102533000.01.T06 | Putative serine/threonine-protein kinase abkB                              |
| maker-1-augustus-gene-452.23-mRNA-1 | NA | NA       |           | Os01g0904500 | OsR498G0102533800.01.T02 | Peptidyl serine alpha-galactosyltransferase                                |
| maker-1-augustus-gene-452.28-mRNA-1 | NA | Indica   |           | Os01g0904700 | OsR498G0102534400.01.T01 | Two-component response regulator ORR26                                     |
| maker-1-augustus-gene-452.32-mRNA-1 | NA | NA       |           | Os01g0627800 | OsR498G0101582300.01.T01 | Secologanin synthase                                                       |
| maker-1-augustus-gene-452.34-mRNA-1 | NA | NA       |           | Os01g0627400 | OsR498G0101580700.01.T01 | Secologanin synthase                                                       |
| maker-1-augustus-gene-452.9-mRNA-1  | NA | NA       |           | Os01g0627500 | OsR498G0101581000.01.T01 | Secologanin synthase                                                       |
| maker-1-augustus-gene-453.0-mRNA-1  | NA | NA       |           | 0            | OsR498G0101577200.01.T02 |                                                                            |

|                                     |    |          |           |              |                          |                                                         |
|-------------------------------------|----|----------|-----------|--------------|--------------------------|---------------------------------------------------------|
| maker-1-augustus-gene-453.13-mRNA-1 | NA | NA       |           | Os01g0625300 | OsR498G0101575700.01.T01 | Heat shock transcription factor                         |
| maker-1-augustus-gene-453.19-mRNA-1 | NA | NA       |           | Os01g0624500 | OsR498G0101574500.01.T01 | Suppressor of the G2                                    |
| maker-1-augustus-gene-453.23-mRNA-1 | NA | NA       |           | Os01g0624400 | OsR498G0101574300.01.T02 | Late embryogenesis abundant                             |
| maker-1-augustus-gene-453.4-mRNA-1  | NA | NA       |           | Os01g0626400 | OsR498G0101577900.01.T01 | WRKY transcription factor                               |
| maker-1-augustus-gene-453.6-mRNA-1  | NA | NA       |           | 0            | OsR498G0101577500.01.T01 |                                                         |
| maker-1-augustus-gene-454.10-mRNA-1 | NA | NA       |           | Os01g0622700 | OsR498G0101566200.01.T01 | Probable protein ABIL1                                  |
| maker-1-augustus-gene-454.15-mRNA-1 | NA | NA       |           | Os01g0623500 | OsR498G0101571300.01.T01 | ATPase family AAA domain-containing protein 1-A         |
| maker-1-augustus-gene-454.20-mRNA-1 | NA | Indica   |           | Os05g0585500 | OsR498G0101565900.01.T01 | Calcium-dependent protein kinase 1 isoform A            |
| maker-1-augustus-gene-454.5-mRNA-1  | NA | Indica   |           | Os01g0891100 | OsR498G0101571600.01.T01 | Endo-polygalacturonase                                  |
| maker-1-augustus-gene-454.7-mRNA-1  | NA | Indica   |           | Os01g0623200 | OsR498G0101568400.01.T03 | S-type anion channel SLAH3                              |
| maker-1-augustus-gene-455.30-mRNA-1 | NA | NA       |           | Os01g0622300 | OsR498G0101565600.01.T03 | Uroporphyrinogen decarboxylase like                     |
| maker-1-augustus-gene-455.32-mRNA-1 | NA | NA       |           | 0            | OsR498G0101565200.01.T03 | Glycosyl transferase family 1 protein isoform 1         |
| maker-1-augustus-gene-455.37-mRNA-1 | NA | NA       | Kinase-TM | Os01g0621600 | OsR498G0101562800.01.T02 | Serine/threonine-protein kinase MARK2                   |
| maker-1-augustus-gene-455.39-mRNA-1 | NA | NA       |           | 0            | OsR498G0101562000.01.T03 | Extra-large G-protein-like                              |
| maker-1-augustus-gene-455.42-mRNA-1 | NA | Indica   |           | Os01g0621200 | OsR498G0101561600.01.T01 | probable GABA transporter 2                             |
| maker-1-augustus-gene-455.48-mRNA-1 | NA | NA       |           | Os01g0621700 | OsR498G0101563100.01.T01 | TH1 domain-containing protein (Fragment)                |
| maker-1-augustus-gene-456.29-mRNA-1 | NA | NA       |           | Os01g0620100 | OsR498G0101558200.01.T01 | Nucleoporin SEH1                                        |
| maker-1-augustus-gene-456.35-mRNA-1 | NA | NA       |           | 0            | OsR498G0101555600.01.T01 | MYB-like transcription factor ETC3                      |
| maker-1-augustus-gene-456.37-mRNA-1 | NA | Indica   |           | Os01g0619000 | OsR498G0101555000.01.T01 | Polypyrimidine tract-binding                            |
| maker-1-augustus-gene-456.41-mRNA-1 | NA | Indica   |           | Os01g0619800 | OsR498G0101557500.01.T02 | Chitinase domain-containing protein 1                   |
| maker-1-augustus-gene-456.44-mRNA-1 | NA | Indica   |           | Os01g0618900 | OsR498G0101554700.01.T01 | Pectin lyase-like superfamily protein (Fragment)        |
| maker-1-augustus-gene-457.0-mRNA-1  | NA | NA       |           | 0            | OsR498G0101554200.01.T03 | ATP-dependent metalloprotease                           |
| maker-1-augustus-gene-457.14-mRNA-1 | NA | NA       |           | Os01g0617800 | OsR498G0101550800.01.T01 | Unconventional prefoldin RPB5 interactor 1              |
| maker-1-augustus-gene-457.18-mRNA-1 | NA | NA       |           | Os01g0617600 | OsR498G0101550000.01.T03 | PORR domain-containing protein (Fragment)               |
| maker-1-augustus-gene-457.19-mRNA-1 | NA | NA       |           | Os01g0617500 | OsR498G0101549200.01.T01 | N-alpha-acetyltransferase 16, NatA auxiliary subunit    |
| maker-1-augustus-gene-457.26-mRNA-1 | NA | NA       |           | 0            | OsR498G0101553700.01.T01 | Regulatory component of ABA receptor 1                  |
| maker-1-augustus-gene-457.30-mRNA-1 | NA | NA       |           | Os01g0618500 | OsR498G0101553100.01.T01 | DEAD-box ATP-dependent RNA helicase                     |
| maker-1-augustus-gene-457.33-mRNA-1 | NA | NA       |           | Os01g0618400 | OsR498G0101552900.01.T01 | DEAD-box ATP-dependent RNA helicase                     |
| maker-1-augustus-gene-457.37-mRNA-1 | NA | Indica   |           | Os01g0618200 | OsR498G0101551700.01.T02 | Protein-serine/threonine phosphatase                    |
| maker-1-augustus-gene-457.39-mRNA-1 | NA | NA       |           | Os01g0617900 | OsR498G0101550900.01.T01 | PsbP domain-containing protein 5 chloroplastic          |
| maker-1-augustus-gene-457.42-mRNA-1 | NA | NA       |           | Os01g0617700 | OsR498G0101550500.01.T04 |                                                         |
| maker-1-augustus-gene-457.7-mRNA-1  | NA | NA       |           | Os01g0618300 | OsR498G0101552600.01.T01 |                                                         |
| maker-1-augustus-gene-457.9-mRNA-1  | NA | NA       |           | Os01g0618100 | OsR498G0101551600.01.T02 | Auxin-induced protein PCNT115                           |
| maker-1-augustus-gene-458.0-mRNA-1  | NA | Indica   |           | Os05g0573300 | OsR498G0101547800.01.T01 | CTP synthase                                            |
| maker-1-augustus-gene-458.10-mRNA-1 | NA | NA       |           |              |                          | Berberine bridge enzyme-like protein 13                 |
| maker-1-augustus-gene-458.12-mRNA-1 | NA | NA       |           | Os01g0616500 | OsR498G0101546500.01.T01 | 39S ribosomal protein L22, mitochondrial-like           |
| maker-1-augustus-gene-458.15-mRNA-1 | NA | Indica   |           | Os05g0587300 | OsR498G0101545900.01.T02 | TPR repeat-containing thioredoxin TTL1                  |
| maker-1-augustus-gene-458.19-mRNA-1 | NA | Indica   |           | Os01g0616100 | OsR498G0101542500.01.T07 | Kinase family with ARM repeat domain-containing protein |
| maker-1-augustus-gene-458.6-mRNA-1  | NA | NA       |           | Os01g0616400 | OsR498G0101546400.01.T02 | Zinc finger CCH domain-containing protein 8             |
| maker-1-augustus-gene-459.43-mRNA-1 | NA | NA       |           | Os01g0615300 | OsR498G0101541200.01.T01 | 10-deacetylbaecatin III-10-O-acetyl transferase         |
| maker-1-augustus-gene-459.45-mRNA-1 | NA | NA       |           | Os01g0615200 | OsR498G0101541000.01.T02 | 10-deacetylbaecatin III-10-O-acetyl transferase         |
| maker-1-augustus-gene-459.47-mRNA-1 | NA | NA       |           | Os01g0614900 | OsR498G0101539800.01.T03 | Ubiquitin-like modifier-activating enzyme ATG7          |
| maker-1-augustus-gene-459.50-mRNA-1 | NA | NA       |           | Os01g0613900 | OsR498G0101537000.01.T02 | Maternal effect embryo arrest 18                        |
| maker-1-augustus-gene-459.57-mRNA-1 | NA | NA       |           | Os01g0613800 | OsR498G0101536800.01.T01 | Senescence-specific cysteine protease SAG39             |
| maker-1-augustus-gene-459.59-mRNA-1 | NA | NA       |           | Os01g0613500 | OsR498G0101536000.01.T01 | Cysteine proteinase-like                                |
| maker-1-augustus-gene-459.61-mRNA-1 | NA | Indica   |           | Os01g0614700 | OsR498G0101539500.01.T01 | Adaptin ear-binding coat-associated protein 1           |
| maker-1-augustus-gene-459.66-mRNA-1 | NA | NA       |           | Os01g0614300 | OsR498G0101538300.01.T01 | Protein trichome birefringence                          |
| maker-1-augustus-gene-459.68-mRNA-1 | NA | NA       |           | Os01g0613300 | OsR498G0101535700.01.T01 | Lipoprotein lpqB (Fragment)                             |
| maker-1-augustus-gene-46.30-mRNA-1  | NA | NA       |           | 0            | OsR498G0100286900.01.T01 | DNA double-strand break repair Rad50 ATPase (Fragment)  |
| maker-1-augustus-gene-46.34-mRNA-1  | NA | Indica   |           | Os01g0185400 | OsR498G0100287900.01.T03 | Pleiotropic regulator 1 (Fragment)                      |
| maker-1-augustus-gene-46.42-mRNA-1  | NA | NA       |           | Os01g0185900 | OsR498G0100288900.01.T01 | DNA-binding WRKY                                        |
| maker-1-augustus-gene-46.44-mRNA-1  | NA | NA       |           | Os01g0185200 | OsR498G0100287200.01.T04 | Glutaminyl-tRNA synthetase                              |
| maker-1-augustus-gene-460.1-mRNA-1  | NA | NA       |           | 0            | OsR498G0101527000.01.T08 | DNA methyl transferase4                                 |
| maker-1-augustus-gene-460.10-mRNA-1 | NA | NA       |           | Os01g0612800 | OsR498G0101532900.01.T03 | Plastid transcriptionally active protein                |
| maker-1-augustus-gene-460.12-mRNA-1 | NA | Indica   |           | Os01g0612700 | OsR498G0101532700.01.T03 | zf-LSD1 domain-containing protein                       |
| maker-1-augustus-gene-460.16-mRNA-1 | NA | Indica   |           | Os01g0612500 | OsR498G0101530100.01.T01 | Acyl-protein thioesterase 2                             |
| maker-1-augustus-gene-460.20-mRNA-1 | NA | NA       |           | Os01g0612200 | OsR498G0101528100.01.T01 | Cytochrome c oxidase polypeptide Vb                     |
| maker-1-augustus-gene-460.24-mRNA-1 | NA | Japonica |           | Os01g0612100 | OsR498G0306062000.01.T02 | Small subunit ribosomal protein (Fragment)              |
| maker-1-augustus-gene-460.26-mRNA-1 | NA | Indica   |           | Os07g0218200 | OsR498G0101526300.01.T01 | (S)-beta-bisabolene synthase                            |
| maker-1-augustus-gene-460.7-mRNA-1  | NA | NA       |           | 0            | OsR498G0101533500.01.T01 | GDSL esterase/lipase                                    |
| maker-1-augustus-gene-461.0-mRNA-1  | NA | NA       |           | Os01g0610800 | OsR498G0101521400.01.T01 | Papilin-like protein isoform X1                         |

|                                     |    |          |           |              |                          |                                                                             |
|-------------------------------------|----|----------|-----------|--------------|--------------------------|-----------------------------------------------------------------------------|
| maker-1-augustus-gene-461.12-mRNA-1 | NA | NA       |           | Os01g0610500 | OsR498G0101520600.01.T01 | Yip1 domain-containing protein                                              |
| maker-1-augustus-gene-461.15-mRNA-1 | NA | NA       |           |              |                          | GTP-binding nuclear protein Ran-1                                           |
| maker-1-augustus-gene-461.18-mRNA-1 | NA | NA       |           | Os01g0611000 | OsR498G0101522300.01.T01 | GTP-binding nuclear protein Ran-3                                           |
| maker-1-augustus-gene-461.20-mRNA-1 | NA | Indica   |           | Os01g0610400 | OsR498G0101520100.01.T02 | N-alpha-acetyltransferase 50                                                |
| maker-1-augustus-gene-461.22-mRNA-1 | NA | NA       |           | Os01g0610300 | OsR498G0101519900.01.T03 | BAH domain-containing protein                                               |
| maker-1-augustus-gene-461.28-mRNA-1 | NA | NA       |           | Os01g0610100 | OsR498G0101518900.01.T01 | ATPase, F0/V0 complex, subunit C protein                                    |
| maker-1-augustus-gene-461.3-mRNA-1  | NA | NA       |           | Os01g0610700 | OsR498G0101521200.01.T01 | RING-CH-type domain-containing protein (Fragment)                           |
| maker-1-augustus-gene-461.6-mRNA-1  | NA | NA       |           | Os01g0610600 | OsR498G0101521000.01.T03 | Carbon catabolite repressor protein 4 like 6                                |
| maker-1-augustus-gene-462.0-mRNA-1  | NA | NA       |           | Os01g0609900 | OsR498G0101517800.01.T02 | Pleiotropic drug resistance protein 4                                       |
| maker-1-augustus-gene-462.13-mRNA-1 | NA | NA       |           | Os01g0609066 | OsR498G0101514000.01.T02 | ABC transporter G family member 34                                          |
| maker-1-augustus-gene-462.16-mRNA-1 | NA | NA       | CC-NBS-TM | 0            | OsR498G1120729200.01.T01 | AAA domain-containing protein                                               |
| maker-1-augustus-gene-462.19-mRNA-1 | NA | NA       |           | 0            | OsR498G0101509900.01.T01 | RING-H2 finger protein ATL5A                                                |
| maker-1-augustus-gene-462.4-mRNA-1  | NA | NA       |           | Os01g0609300 | OsR498G0101515200.01.T01 | pleiotropic drug resistance protein 1-like                                  |
| maker-1-augustus-gene-462.8-mRNA-1  | NA | Indica   |           | Os01g0609066 | OsR498G0101514400.01.T01 | Pleiotropic drug resistance protein 3                                       |
| maker-1-augustus-gene-462.9-mRNA-1  | NA | NA       |           | Os01g0609200 | OsR498G0101514400.01.T01 | ABC transporter domain-containing protein                                   |
| maker-1-augustus-gene-463.15-mRNA-1 | NA | NA       |           | Os01g0608366 |                          | Peptidase A1 domain-containing protein (Fragment)                           |
| maker-1-augustus-gene-463.22-mRNA-1 | NA | NA       |           | Os01g0607200 | OsR498G0101503700.01.T01 | Amino-acid permease BAT1 like                                               |
| maker-1-augustus-gene-463.23-mRNA-1 | NA | NA       |           | Os01g0607200 | OsR498G0101503300.01.T01 | Amino-acid permease BAT1                                                    |
| maker-1-augustus-gene-463.3-mRNA-1  | NA | NA       |           |              |                          | Transcriptional corepressor LEUNIG                                          |
| maker-1-augustus-gene-463.6-mRNA-1  | NA | NA       |           | Os01g0607400 | OsR498G0101504200.01.T03 | Transcriptional corepressor LEUNIG                                          |
| maker-1-augustus-gene-464.0-mRNA-1  | NA | NA       |           | Os01g0606200 |                          |                                                                             |
| maker-1-augustus-gene-464.10-mRNA-1 | NA | NA       |           | Os01g0606900 | OsR498G0101502300.01.T01 | J domain-containing protein                                                 |
| maker-1-augustus-gene-464.13-mRNA-1 | NA | NA       |           | Os01g0606000 | OsR498G0101499300.01.T01 | Bidirectional sugar transporter SWEET                                       |
| maker-1-augustus-gene-464.15-mRNA-1 | NA | NA       |           | Os01g0605700 | OsR498G0101498500.01.T01 | Bidirectional sugar transporter SWEET                                       |
| maker-1-augustus-gene-464.17-mRNA-1 | NA | NA       |           | 0            | OsR498G0101498300.01.T01 | C3HC-type domain-containing protein (Fragment)                              |
| maker-1-augustus-gene-464.2-mRNA-1  | NA | NA       |           | Os01g0605850 |                          |                                                                             |
| maker-1-augustus-gene-464.20-mRNA-1 | NA | NA       |           | Os01g0605400 | OsR498G0101497900.01.T02 | Protein GAMETE EXPRESSED 3                                                  |
| maker-1-augustus-gene-464.22-mRNA-1 | NA | NA       |           | Os01g0605300 | OsR498G0101497900.01.T01 | UBC core domain-containing protein (Fragment)                               |
| maker-1-augustus-gene-464.24-mRNA-1 | NA | Indica   |           | Os01g0605100 | OsR498G0101497700.01.T02 | Adenosinetriphosphatase                                                     |
| maker-1-augustus-gene-464.4-mRNA-1  | NA | Japonica |           | Os01g0605500 | OsR498G0101498200.01.T01 | Kinesin-like protein KIN-8A                                                 |
| maker-1-augustus-gene-464.7-mRNA-1  | NA | NA       |           | Os01g0605200 | OsR498G0101497400.01.T04 | DNL-type domain-containing protein (Fragment)                               |
| maker-1-augustus-gene-465.0-mRNA-1  | NA | NA       |           | Os01g0604700 | OsR498G0101495000.01.T01 | Transmembrane protein 33                                                    |
| maker-1-augustus-gene-465.11-mRNA-1 | NA | Japonica |           | Os01g0604100 | OsR498G0100035900.01.T05 | Usp domain-containing protein                                               |
| maker-1-augustus-gene-465.13-mRNA-1 | NA | NA       |           | Os01g0603300 | OsR498G0101487900.01.T01 | Transcription factor MYB53                                                  |
| maker-1-augustus-gene-465.15-mRNA-1 | NA | NA       | NBS-TM    | 0            | OsR498G0101487100.01.T01 | Mitochondrial import inner membrane translocase subunit                     |
| maker-1-augustus-gene-465.17-mRNA-1 | NA | NA       | Kinase-TM | 0            | OsR498G0101485500.01.T05 | Kinase protein with adenine nucleotide alpha hydrolases-like domain isoform |
| maker-1-augustus-gene-465.4-mRNA-1  | NA | NA       |           |              |                          |                                                                             |
| maker-1-augustus-gene-465.6-mRNA-1  | NA | NA       |           | Os01g0603000 | OsR498G0101486800.01.T01 | RGG repeats nuclear RNA binding protein A                                   |
| maker-1-augustus-gene-466.17-mRNA-1 | NA | Indica   |           | Os11g0566800 | OsR498G0101483200.01.T01 | Chalcone synthase F                                                         |
| maker-1-augustus-gene-466.34-mRNA-1 | NA | Japonica |           | Os01g0602400 | OsR498G0101582500.01.T01 | Secologanin synthase                                                        |
| maker-1-augustus-gene-466.38-mRNA-1 | NA | Japonica |           | Os01g0602200 | OsR498G0101482200.01.T03 | Secologanin synthase                                                        |
| maker-1-augustus-gene-466.47-mRNA-1 | NA | Indica   | Kinase-TM | Os01g0601200 | OsR498G0101477700.01.T01 | Putative serine/threonine-protein kinase                                    |
| maker-1-augustus-gene-467.12-mRNA-1 | NA | NA       |           | Os01g0598400 | OsR498G0101471400.01.T01 | FBD domain-containing protein (Fragment)                                    |
| maker-1-augustus-gene-467.14-mRNA-1 | NA | Indica   |           | Os01g0600300 | OsR498G0101474700.01.T01 |                                                                             |
| maker-1-augustus-gene-467.18-mRNA-1 | NA | Indica   |           | Os02g0224200 | OsR498G0101474500.01.T01 | Serine/threonine-protein phosphatase 2A 55 kDa regulatory subunit B         |
| maker-1-augustus-gene-467.23-mRNA-1 | NA | Japonica |           | Os01g0599900 | OsR498G0101473900.01.T01 | SUN domain-containing protein (Fragment)                                    |
| maker-1-augustus-gene-467.29-mRNA-1 | NA | NA       |           | Os01g0598200 | OsR498G0101471100.01.T02 | Calcineurin B-like protein 5 variant                                        |
| maker-1-augustus-gene-467.3-mRNA-1  | NA | Indica   |           | Os02g0226200 | OsR498G0101475400.01.T01 | Pyridoxal phosphate phosphatase-related protein                             |
| maker-1-augustus-gene-467.5-mRNA-1  | NA | NA       |           | Os01g0600000 | OsR498G0101474200.01.T03 | Hydrogen-transporting ATP synthase, rotational mechanism                    |
| maker-1-augustus-gene-467.9-mRNA-1  | NA | NA       |           | Os01g0598900 | OsR498G0101473200.01.T03 | Cytoplasmic tRNA 2-thiolation protein 1                                     |
| maker-1-augustus-gene-468.0-mRNA-1  | NA | Indica   |           | Os01g0597800 | OsR498G0101469500.01.T01 | Glycosyltransferase                                                         |
| maker-1-augustus-gene-468.2-mRNA-1  | NA | NA       |           | Os01g0597600 | OsR498G0101469100.01.T01 | Amino acid transporter, transmembrane                                       |
| maker-1-augustus-gene-468.3-mRNA-1  | NA | Japonica |           | Os01g0597400 | OsR498G0101468700.01.T01 | Amino acid/polyamine transporter II                                         |
| maker-1-augustus-gene-468.5-mRNA-1  | NA | NA       |           | Os01g0596700 | OsR498G0101466500.01.T01 | FBD domain-containing protein                                               |
| maker-1-augustus-gene-468.7-mRNA-1  | NA | NA       |           |              |                          | FBD domain-containing protein                                               |
| maker-1-augustus-gene-469.37-mRNA-1 | NA | NA       |           | Os01g0594700 |                          | DAO domain-containing protein                                               |
| maker-1-augustus-gene-469.39-mRNA-1 | NA | NA       |           | Os01g0596300 | OsR498G0101463900.01.T01 | FBD domain-containing protein                                               |
| maker-1-augustus-gene-469.41-mRNA-1 | NA | NA       |           | Os01g0596100 | OsR498G0101463300.01.T01 | Ribosomal RNA apurinic site specific lyase-like                             |
| maker-1-augustus-gene-469.43-mRNA-1 | NA | Japonica |           | Os01g0596000 | OsR498G0101462900.01.T01 | FBD domain-containing protein                                               |
| maker-1-augustus-gene-469.45-mRNA-1 | NA | NA       |           | Os01g0595900 | OsR498G0101462700.01.T01 | FBD domain-containing protein (Fragment)                                    |
| maker-1-augustus-gene-469.47-mRNA-1 | NA | NA       |           | Os01g0595800 | OsR498G0101462500.01.T01 | FBD domain-containing protein                                               |

|                                     |    |          |            |              |                          |                                                                            |
|-------------------------------------|----|----------|------------|--------------|--------------------------|----------------------------------------------------------------------------|
| maker-1-augustus-gene-469.49-mRNA-1 | NA | Japonica |            | Os01g0595700 | OsR498G0101462300.01.T01 | Ribosomal RNA apurinic site specific lyase                                 |
| maker-1-augustus-gene-469.52-mRNA-1 | NA | Japonica |            | Os01g0595600 | OsR498G0101462100.01.T01 | Strigolactone esterase                                                     |
| maker-1-augustus-gene-469.55-mRNA-1 | NA | Indica   |            | Os01g0719600 | OsR498G0101460100.01.T01 | HMA domain-containing protein (Fragment)                                   |
| maker-1-augustus-gene-469.58-mRNA-1 | NA | NA       |            | 0            | OsR498G0101459700.01.T03 | CASC3/Barentsz eIF4AIII binding                                            |
| maker-1-augustus-gene-47.24-mRNA-1  | NA | NA       |            |              |                          |                                                                            |
| maker-1-augustus-gene-47.31-mRNA-1  | NA | NA       |            | Os01g0187500 |                          | Zinc finger CCH domain-containing protein 17                               |
| maker-1-augustus-gene-47.33-mRNA-1  | NA | NA       |            | 0            | OsR498G0100296500.01.T02 | Zinc finger CCH domain-containing protein 59                               |
| maker-1-augustus-gene-47.36-mRNA-1  | NA | NA       |            | 0            | OsR498G0100299700.01.T04 | probable 2-oxoglutarate-dependent dioxygenase At3g49630 isoform X2         |
| maker-1-augustus-gene-47.42-mRNA-1  | NA | NA       | Kinase-TM  | Os01g0186700 | OsR498G0100292200.01.T03 | AGC (cAMP-dependent cGMP-dependent and protein kinase C) kinase family     |
| maker-1-augustus-gene-47.49-mRNA-1  | NA | NA       |            | 0            | OsR498G0100297400.01.T02 | Cytokinin dehydrogenase                                                    |
| maker-1-augustus-gene-47.52-mRNA-1  | NA | NA       |            | Os01g0187900 | OsR498G0100298600.01.T02 | Myb family transcription factor                                            |
| maker-1-augustus-gene-470.37-mRNA-1 | NA | NA       |            | Os01g0594500 | OsR498G0101457800.01.T01 |                                                                            |
| maker-1-augustus-gene-470.39-mRNA-1 | NA | NA       |            | Os01g0905200 | OsR498G0102535900.01.T01 | Transposon protein, putative, unclassified                                 |
| maker-1-augustus-gene-471.21-mRNA-1 | NA | NA       |            | Os01g0906600 | OsR498G0102541400.01.T01 | probable UDP-N-acetylglucosamine--peptide N-acetylglucosaminyltransferase  |
| maker-1-augustus-gene-471.6-mRNA-1  | NA | NA       |            | Os01g0907400 |                          | Lysine-specific demethylase                                                |
| maker-1-augustus-gene-471.8-mRNA-1  | NA | NA       |            | Os01g0907900 | OsR498G0102544500.01.T01 | RRM domain-containing protein (Fragment)                                   |
| maker-1-augustus-gene-472.8-mRNA-1  | NA | NA       |            | Os01g0909900 |                          | Putative transcription factor/ chromatin remodeling BED-type(Zn) family    |
| maker-1-augustus-gene-48.38-mRNA-1  | NA | Indica   |            | Os01g0175200 | OsR498G0100304700.01.T02 | Dolichyl-diphosphooligosaccharide--protein glycotransferase                |
| maker-1-augustus-gene-48.42-mRNA-1  | NA | NA       |            | Os01g0190000 | OsR498G0100305100.01.T02 | TauD domain-containing protein (Fragment)                                  |
| maker-1-augustus-gene-48.46-mRNA-1  | NA | NA       |            | Os01g0190300 | OsR498G0100306900.01.T01 | Auxin-responsive protein IAA2                                              |
| maker-1-augustus-gene-48.48-mRNA-1  | NA | NA       |            | Os01g0190500 | OsR498G0100307700.01.T01 | IQ-domain 25                                                               |
| maker-1-augustus-gene-48.50-mRNA-1  | NA | NA       |            | 0            | OsR498G0100300000.01.T02 | ARM repeat superfamily protein                                             |
| maker-1-augustus-gene-48.56-mRNA-1  | NA | NA       |            | Os01g0188400 | OsR498G0100300400.01.T01 | NADP-dependent malic enzyme, chloroplastic                                 |
| maker-1-augustus-gene-48.63-mRNA-1  | NA | Indica   |            | Os01g0189100 | OsR498G0100251400.01.T01 | Boron transporter-like protein 2                                           |
| maker-1-augustus-gene-48.73-mRNA-1  | NA | NA       |            | Os01g0189100 | OsR498G0100303800.01.T02 | Boron transporter-like protein 2                                           |
| maker-1-augustus-gene-48.77-mRNA-1  | NA | Japonica |            | Os01g0190400 | OsR498G0100307200.01.T02 | Phosphotransferase                                                         |
| maker-1-augustus-gene-485.18-mRNA-1 | NA | NA       |            | Os01g0931000 | OsR498G0102639100.01.T01 | Tropinone reductase                                                        |
| maker-1-augustus-gene-489.39-mRNA-1 | NA | NA       |            | Os01g0938200 | OsR498G0102666300.01.T01 | RNA-binding protein BRN1                                                   |
| maker-1-augustus-gene-49.0-mRNA-1   | NA | NA       |            | Os01g0191100 | OsR498G0100309500.01.T03 | Ribosomal protein 60S                                                      |
| maker-1-augustus-gene-49.10-mRNA-1  | NA | NA       |            | Os01g0191700 | OsR498G0100312900.01.T08 | ATP-dependent 6-phosphofructokinase                                        |
| maker-1-augustus-gene-49.16-mRNA-1  | NA | NA       |            | Os01g0191000 | OsR498G0100309400.01.T03 | Late embryogenesis abundant protein-related / LEA protein-related          |
| maker-1-augustus-gene-49.18-mRNA-1  | NA | NA       |            | Os01g0191200 | OsR498G0100310200.01.T01 | Stem 28 kDa glycoprotein (Fragment)                                        |
| maker-1-augustus-gene-49.20-mRNA-1  | NA | Indica   |            | Os01g0191300 | OsR498G0100311400.01.T05 | NAC domain-containing protein 73                                           |
| maker-1-augustus-gene-49.26-mRNA-1  | NA | NA       |            | Os01g0191800 | OsR498G0100313200.01.T04 | Non-specific serine/threonine protein kinase                               |
| maker-1-augustus-gene-49.32-mRNA-1  | NA | NA       |            | Os01g0191900 | OsR498G0100313800.01.T01 | Transcription factor RAX2                                                  |
| maker-1-augustus-gene-49.4-mRNA-1   | NA | NA       |            | Os01g0191500 | OsR498G0100311700.01.T01 | Mitochondrial-processing peptidase alpha subunit                           |
| maker-1-augustus-gene-491.12-mRNA-1 | NA | NA       |            | Os01g0941400 | OsR498G0102675700.01.T01 | Truncated pathogenesis-related protein 6                                   |
| maker-1-augustus-gene-491.15-mRNA-1 | NA | NA       |            | Os07g0513300 | OsR498G1120703200.01.T01 | PMD domain-containing protein (Fragment)                                   |
| maker-1-augustus-gene-491.18-mRNA-1 | NA | NA       |            | Os01g0941800 | OsR498G0102677000.01.T01 | probable inactive purple acid phosphatase 16                               |
| maker-1-augustus-gene-491.2-mRNA-1  | NA | NA       |            | Os01g0940800 | OsR498G0102674300.01.T01 | Beta-1,3-glucanase II                                                      |
| maker-1-augustus-gene-491.22-mRNA-1 | NA | NA       |            | 0            | OsR498G0102678600.01.T01 | PMD domain-containing protein                                              |
| maker-1-augustus-gene-492.0-mRNA-1  | NA | NA       |            |              |                          |                                                                            |
| maker-1-augustus-gene-492.6-mRNA-1  | NA | Indica   |            | Os05g0375400 | OsR498G0102679000.01.T01 | Licheninase                                                                |
| maker-1-augustus-gene-492.8-mRNA-1  | NA | Indica   |            | Os01g0176400 | OsR498G0102681800.01.T01 | NPH3 domain-containing protein (Fragment)                                  |
| maker-1-augustus-gene-493.66-mRNA-1 | NA | NA       |            | 0            | OsR498G0102686200.01.T02 | DNA repair protein recA, mitochondrial                                     |
| maker-1-augustus-gene-494.35-mRNA-1 | NA | NA       |            |              |                          | Glucan endo-1,3-beta-glucosidase GII                                       |
| maker-1-augustus-gene-494.38-mRNA-1 | NA | NA       |            | Os01g0947000 | OsR498G0102690700.01.T01 | Glucan endo-1,3-beta-glucosidase GIII                                      |
| maker-1-augustus-gene-494.48-mRNA-1 | NA | NA       | LRR-NBS-TM | Os01g0947700 |                          | Beta 1,3-glucanase                                                         |
| maker-1-augustus-gene-495.0-mRNA-1  | NA | NA       |            | Os01g0949700 | OsR498G0102701900.01.T03 | Glutathione S-transferase, N-terminal domain containing protein, expressed |
| maker-1-augustus-gene-495.10-mRNA-1 | NA | NA       |            | 0            | OsR498G0102700600.01.T02 | Phytochromobilin synthase                                                  |
| maker-1-augustus-gene-495.2-mRNA-1  | NA | Japonica |            | Os01g0949850 | OsR498G0102702700.01.T01 | Glucan endo-1,3-beta-glucosidase GV                                        |
| maker-1-augustus-gene-496.17-mRNA-1 | NA | NA       |            | Os01g0951200 | OsR498G0102704900.01.T02 | OMPdecase                                                                  |
| maker-1-augustus-gene-496.2-mRNA-1  | NA | NA       |            | Os01g0950700 | OsR498G0102703700.01.T01 | Plant calmodulin-binding protein-related                                   |
| maker-1-augustus-gene-496.21-mRNA-1 | NA | Indica   |            | Os01g0951400 | OsR498G0102705300.01.T01 | OMPdecase                                                                  |
| maker-1-augustus-gene-496.29-mRNA-1 | NA | NA       |            | Os01g0952200 | OsR498G0102707300.01.T01 | Helicase C-terminal domain-containing protein                              |
| maker-1-augustus-gene-496.32-mRNA-1 | NA | NA       |            | Os01g0950800 | OsR498G0102704000.01.T04 | Essential protein Yae1 N-terminal                                          |
| maker-1-augustus-gene-496.36-mRNA-1 | NA | Indica   |            | Os05g0150000 | OsR498G0102704200.01.T01 | Pyridoxal phosphate homeostasis protein                                    |
| maker-1-augustus-gene-496.4-mRNA-1  | NA | NA       |            | Os01g0950900 | OsR498G0102704300.01.T03 | Hyperosmolality-gated Ca2+ permeable channel 2.5                           |
| maker-1-augustus-gene-496.41-mRNA-1 | NA | NA       |            |              |                          | Flowering time control protein FY                                          |
| maker-1-augustus-gene-496.47-mRNA-1 | NA | NA       |            | Os01g0951800 | OsR498G0102706400.01.T01 | Mitochondrial fission 1 protein A (Fragment)                               |
| maker-1-augustus-gene-496.49-mRNA-1 | NA | NA       |            | Os01g0952300 | OsR498G0102707600.01.T01 | Regulator of chromosome condensation (RCC1) family with FYVE zinc finger   |



|                                     |    |          |              |              |                          |                                                                              |
|-------------------------------------|----|----------|--------------|--------------|--------------------------|------------------------------------------------------------------------------|
| maker-1-augustus-gene-497.42-mRNA-1 | NA | NA       |              |              |                          | Beta-galactosidase                                                           |
| maker-1-augustus-gene-497.52-mRNA-1 | NA | NA       |              | Os01g0952700 | OsR498G0102709900.01.T01 | Protein LONG AFTER FAR-RED 3                                                 |
| maker-1-augustus-gene-497.62-mRNA-1 | NA | NA       |              | Os01g0952800 | OsR498G0102710200.01.T03 | Transcription factor ORG2                                                    |
| maker-1-augustus-gene-497.64-mRNA-1 | NA | NA       |              | Os01g0953600 | OsR498G0102713200.01.T01 | NAD(P)H dehydrogenase (quinone)                                              |
| maker-1-augustus-gene-50.0-mRNA-1   | NA | NA       |              | Os01g0192300 | OsR498G0100319400.01.T01 | Bacterial transferase hexapeptide repeat-containing protein isoform 1        |
| maker-1-augustus-gene-50.2-mRNA-1   | NA | NA       |              | Os01g0192600 | OsR498G0100320400.01.T02 | Pollen-specific protein SF21                                                 |
| maker-1-augustus-gene-50.6-mRNA-1   | NA | NA       |              | Os01g0192900 | OsR498G0100322800.01.T01 | 1-aminocyclopropane-1-carboxylic acid synthase                               |
| maker-1-augustus-gene-50.8-mRNA-1   | NA | Japonica |              | Os01g0193500 | OsR498G0100325000.01.T01 | F-box/LRR-repeat protein At4g29420                                           |
| maker-1-augustus-gene-500.1-mRNA-1  | NA | NA       |              | 0            | OsR498G0102733900.01.T03 | NUC173 domain-containing protein                                             |
| maker-1-augustus-gene-500.12-mRNA-1 | NA | NA       |              | Os01g0958400 | OsR498G0102735300.01.T04 | Putative CRM domain-containing protein, chloroplastic                        |
| maker-1-augustus-gene-500.44-mRNA-1 | NA | Indica   |              | Os01g0959600 | OsR498G0102738500.01.T01 | PPR repeat protein-like                                                      |
| maker-1-augustus-gene-500.50-mRNA-1 | NA | Japonica |              | Os01g0960200 | OsR498G0102740300.01.T02 | DUF632 domain-containing protein/DUF630 domain-containing protein            |
| maker-1-augustus-gene-500.53-mRNA-1 | NA | Indica   |              | Os01g0958100 | OsR498G0102734800.01.T04 | Chloroplast srp54 receptor 1                                                 |
| maker-1-augustus-gene-500.6-mRNA-1  | NA | NA       | CC-Kinase-TM | Os01g0958000 | OsR498G0102734300.01.T01 | Cyclin-dependent kinase                                                      |
| maker-1-augustus-gene-500.68-mRNA-1 | NA | NA       |              | 0            | OsR498G0102739200.01.T02 | Phosphatidylserine decarboxylase                                             |
| maker-1-augustus-gene-501.18-mRNA-1 | NA | NA       |              | Os01g0960300 | OsR498G0102740600.01.T01 | Glucose-inhibited division family A protein isoform 1                        |
| maker-1-augustus-gene-501.50-mRNA-1 | NA | NA       |              | Os01g0961600 | OsR498G0102743800.01.T01 |                                                                              |
| maker-1-augustus-gene-501.6-mRNA-1  | NA | NA       |              | Os01g0961300 | OsR498G0102743300.01.T03 |                                                                              |
| maker-1-augustus-gene-502.0-mRNA-1  | NA | NA       |              | Os01g0962700 | OsR498G0102746100.01.T01 | Peroxidase                                                                   |
| maker-1-augustus-gene-503.14-mRNA-1 | NA | NA       |              | 0            | OsR498G0102756700.01.T05 | ABC transporter D family member 1                                            |
| maker-1-augustus-gene-503.25-mRNA-1 | NA | NA       |              | Os01g0966500 | OsR498G0102757500.01.T02 | Vacuolar protein sorting-associated protein 55 like                          |
| maker-1-augustus-gene-503.29-mRNA-1 | NA | NA       |              | Os01g0966700 | OsR498G0102757700.01.T06 | Fructan exohydrolase                                                         |
| maker-1-augustus-gene-503.43-mRNA-1 | NA | NA       |              | Os01g0966200 | OsR498G0102757000.01.T01 | Cofactor assembly                                                            |
| maker-1-augustus-gene-504.45-mRNA-1 | NA | NA       |              | Os01g0967100 | OsR498G0102759700.01.T01 |                                                                              |
| maker-1-augustus-gene-504.51-mRNA-1 | NA | NA       |              | Os01g0967200 | OsR498G0102761300.01.T01 | Rho GTPase-activating gacA                                                   |
| maker-1-augustus-gene-504.62-mRNA-1 | NA | Indica   |              | Os01g0968400 | OsR498G0102762900.01.T01 | Late embryogenesis abundant protein-related / LEA protein-related            |
| maker-1-augustus-gene-504.64-mRNA-1 | NA | NA       |              |              |                          | BACK domain-containing protein                                               |
| maker-1-augustus-gene-504.67-mRNA-1 | NA | NA       |              | Os01g0968700 |                          | tRNA isopentenyltransferase                                                  |
| maker-1-augustus-gene-504.69-mRNA-1 | NA | Indica   |              | Os01g0966900 | OsR498G0102758400.01.T01 | Polyol transporter 5                                                         |
| maker-1-augustus-gene-504.71-mRNA-1 | NA | NA       |              | Os01g0967000 |                          | Small nuclear ribonucleoprotein Sm D2                                        |
| maker-1-augustus-gene-505.0-mRNA-1  | NA | NA       |              | 0            | OsR498G0102766700.01.T01 |                                                                              |
| maker-1-augustus-gene-505.12-mRNA-1 | NA | NA       |              | 0            | OsR498G0102765400.01.T04 |                                                                              |
| maker-1-augustus-gene-505.18-mRNA-1 | NA | NA       |              |              |                          |                                                                              |
| maker-1-augustus-gene-505.2-mRNA-1  | NA | NA       |              | Os01g0970400 | OsR498G0102770700.01.T01 | mRNA cap-binding protein (Fragment)                                          |
| maker-1-augustus-gene-505.22-mRNA-1 | NA | NA       |              | 0            | OsR498G0102769200.01.T02 |                                                                              |
| maker-1-augustus-gene-505.25-mRNA-1 | NA | NA       |              | 0            | OsR498G0102771400.01.T01 | DEAD-box ATP-dependent RNA helicase                                          |
| maker-1-augustus-gene-505.29-mRNA-1 | NA | NA       |              | Os01g0970700 | OsR498G0102771600.01.T04 | Ste24 endopeptidase                                                          |
| maker-1-augustus-gene-505.35-mRNA-1 | NA | NA       |              | Os01g0971200 | OsR498G0102773200.01.T01 | Lysine ketoglutarate reductase trans-splicing related 1                      |
| maker-1-augustus-gene-505.6-mRNA-1  | NA | NA       |              | Os01g0970500 | OsR498G0102771100.01.T01 | Transcription initiation factor IIA subunit 2                                |
| maker-1-augustus-gene-505.8-mRNA-1  | NA | NA       |              | Os01g0971100 | OsR498G0102772900.01.T03 | Drought-induced 19                                                           |
| maker-1-augustus-gene-506.0-mRNA-1  | NA | NA       |              | Os01g0971400 | OsR498G0102773700.01.T01 | Cysteine protease XCP2 isoform A                                             |
| maker-1-augustus-gene-506.10-mRNA-1 | NA | NA       |              | Os01g0971600 | OsR498G0102774400.01.T03 | Glycerol-3-phosphate dehydrogenase [NAD(+)] 1, chloroplastic                 |
| maker-1-augustus-gene-506.16-mRNA-1 | NA | Indica   |              | Os01g0971700 | OsR498G0102774800.01.T03 | Ribosome association toxin RatA (Fragment)                                   |
| maker-1-augustus-gene-506.2-mRNA-1  | NA | Indica   |              | Os01g0971500 | OsR498G0102774100.01.T02 | Cytochrome b5 heme-binding domain-containing protein                         |
| maker-1-augustus-gene-506.9-mRNA-1  | NA | NA       |              | Os01g0971600 | OsR498G0102774400.01.T02 | Glycerol-3-phosphate dehydrogenase [NAD(+)]                                  |
| maker-1-augustus-gene-508.37-mRNA-1 | NA | NA       |              |              |                          | fructose-bisphosphate aldolase-lysine N-methyltransferase, chloroplastic iso |
| maker-1-augustus-gene-509.0-mRNA-1  | NA | NA       |              | Os01g0977100 | OsR498G0102790900.01.T01 | Tetraspanin-6                                                                |
| maker-1-augustus-gene-51.0-mRNA-1   | NA | NA       |              | Os01g0193900 | OsR498G0100325700.01.T06 | DIRP domain-containing protein                                               |
| maker-1-augustus-gene-51.11-mRNA-1  | NA | Indica   |              | Os01g0194000 | OsR498G0100326000.01.T02 | C2 NT-type domain-containing protein                                         |
| maker-1-augustus-gene-51.14-mRNA-1  | NA | NA       |              | Os01g0194200 | OsR498G0100328000.01.T02 | IQ-domain 6                                                                  |
| maker-1-augustus-gene-51.16-mRNA-1  | NA | NA       |              | Os01g0194300 | OsR498G0100328800.01.T01 | BTB/POZ domain and ankyrin repeat-containing protein NPR1                    |
| maker-1-augustus-gene-51.18-mRNA-1  | NA | NA       | Kinase-TM    | 0            | OsR498G0100334000.01.T02 | Protein kinase domain-containing protein                                     |
| maker-1-augustus-gene-51.5-mRNA-1   | NA | NA       |              | Os01g0195000 |                          | protein indeterminate-domain 7 isoform X2                                    |
| maker-1-augustus-gene-51.7-mRNA-1   | NA | NA       |              | Os01g0193600 | OsR498G0100325200.01.T03 | TRAM domain-containing protein (Fragment)                                    |
| maker-1-augustus-gene-510.0-mRNA-1  | NA | NA       |              | Os01g0819700 | OsR498G0102222100.01.T02 | Protein ENHANCED DISEASE RESISTANCE 4                                        |
| maker-1-augustus-gene-510.11-mRNA-1 | NA | NA       |              | Os01g0950700 | OsR498G0102703700.01.T01 | Plant calmodulin-binding protein-related                                     |
| maker-1-augustus-gene-510.13-mRNA-1 | NA | NA       |              | Os01g0950900 | OsR498G0102704300.01.T03 | Hyperosmolality-gated Ca2+ permeable channel 2.5                             |
| maker-1-augustus-gene-510.2-mRNA-1  | NA | NA       |              | Os01g0831200 | OsR498G0102268500.01.T02 | BCL-2-associated athanogene 4                                                |
| maker-1-augustus-gene-510.20-mRNA-1 | NA | NA       |              | Os01g0831200 | OsR498G0102268500.01.T02 | BCL-2-associated athanogene 4                                                |
| maker-1-augustus-gene-510.26-mRNA-1 | NA | NA       |              | Os01g0840300 | OsR498G0102304200.01.T01 | Homeobox domain                                                              |
| maker-1-augustus-gene-510.28-mRNA-1 | NA | NA       |              | Os01g0950800 | OsR498G0102704000.01.T04 | Essential protein Yae1 N-terminal                                            |

|                                     |    |          |               |              |                          |                                                                            |
|-------------------------------------|----|----------|---------------|--------------|--------------------------|----------------------------------------------------------------------------|
| maker-1-augustus-gene-510.32-mRNA-1 | NA | Indica   |               | Os05g0150000 | OsR498G0102704200.01.T01 | Pyridoxal phosphate homeostasis protein                                    |
| maker-1-augustus-gene-510.37-mRNA-1 | NA | NA       |               | Os01g0951000 | OsR498G0102704600.01.T03 | Flowering time control protein FY                                          |
| maker-1-augustus-gene-510.8-mRNA-1  | NA | NA       |               | Os01g0909900 |                          | Putative transcription factor/ chromatin remodeling BED-type(Zn) family    |
| maker-1-augustus-gene-52.26-mRNA-1  | NA | NA       |               | Os01g0195700 | OsR498G0100335900.01.T01 | BHLH transcription factor                                                  |
| maker-1-augustus-gene-52.29-mRNA-1  | NA | NA       |               | Os01g0195500 | OsR498G0100335800.01.T01 | Translation machinery-associated protein 22                                |
| maker-1-augustus-gene-54.0-mRNA-1   | NA | NA       |               | Os01g0199900 | OsR498G0100350300.01.T03 | Alr carboxylase                                                            |
| maker-1-augustus-gene-54.10-mRNA-1  | NA | Indica   |               | Os01g0198500 | OsR498G0100346600.01.T01 |                                                                            |
| maker-1-augustus-gene-54.11-mRNA-1  | NA | NA       |               | Os01g0199400 | OsR498G0100348800.01.T01 | Monoglyceride lipase                                                       |
| maker-1-augustus-gene-54.16-mRNA-1  | NA | NA       |               | Os01g0200000 | OsR498G0100350800.01.T02 | Autophagy-related protein 3                                                |
| maker-1-augustus-gene-54.25-mRNA-1  | NA | NA       |               | 0            | OsR498G0100352000.01.T01 | Homeobox-leucine zipper protein ATHB-8                                     |
| maker-1-augustus-gene-54.6-mRNA-1   | NA | NA       |               | Os01g0200100 |                          | Acetohydroxy-acid reductoisomerase                                         |
| maker-1-augustus-gene-55.10-mRNA-1  | NA | NA       |               |              |                          | Thioredoxin-related transmembrane protein 2                                |
| maker-1-augustus-gene-55.11-mRNA-1  | NA | NA       |               | Os01g0200400 | OsR498G0100352400.01.T02 | Thioredoxin superfamily protein                                            |
| maker-1-augustus-gene-55.3-mRNA-1   | NA | Indica   | Kinase-TM     | Os08g0112500 | OsR498G0100356100.01.T01 | probable serine/threonine-protein kinase At1g54610                         |
| maker-1-augustus-gene-58.20-mRNA-1  | NA | NA       |               | Os01g0205500 | OsR498G0100374300.01.T01 | 60S ribosomal protein L11                                                  |
| maker-1-augustus-gene-58.24-mRNA-1  | NA | NA       |               | Os01g0205900 | OsR498G0100376100.01.T01 | Peroxidase                                                                 |
| maker-1-augustus-gene-58.26-mRNA-1  | NA | NA       |               | Os01g0206600 |                          |                                                                            |
| maker-1-augustus-gene-58.29-mRNA-1  | NA | Indica   |               | Os01g0204900 | OsR498G0203659800.01.T01 | rRNA N-glycosidase                                                         |
| maker-1-augustus-gene-58.3-mRNA-1   | NA | NA       |               | Os01g0205100 |                          | WD repeat-containing protein 53                                            |
| maker-1-augustus-gene-58.31-mRNA-1  | NA | Indica   | Kinase-TM     | Os05g0207500 | OsR498G0100374600.01.T04 | Non-specific serine/threonine protein kinase                               |
| maker-1-augustus-gene-58.38-mRNA-1  | NA | NA       |               | Os01g0206200 | OsR498G0100376800.01.T01 |                                                                            |
| maker-1-augustus-gene-58.40-mRNA-1  | NA | NA       | Kinase-LRR-TM | Os01g0206800 | OsR498G0100378000.01.T01 | Transmembrane kinase                                                       |
| maker-1-augustus-gene-59.12-mRNA-1  | NA | NA       |               | Os01g0208700 | OsR498G0100384500.01.T01 | Phosphoenolpyruvate carboxylase                                            |
| maker-1-augustus-gene-59.2-mRNA-1   | NA | NA       |               | Os01g0207900 | OsR498G0100381300.01.T01 | EamA domain-containing protein (Fragment)                                  |
| maker-1-augustus-gene-59.4-mRNA-1   | NA | Indica   |               | Os01g0207900 | OsR498G0100381700.01.T01 |                                                                            |
| maker-1-augustus-gene-59.6-mRNA-1   | NA | NA       |               | Os01g0208600 | OsR498G0100384300.01.T02 | SCAR-like protein 2                                                        |
| maker-1-augustus-gene-61.24-mRNA-1  | NA | Indica   |               | Os01g0210800 | OsR498G0100394100.01.T01 | phospho-N-acetylmuramoyl-pentapeptide- transferase homolog isoform X1      |
| maker-1-augustus-gene-61.32-mRNA-1  | NA | NA       |               | Os01g0211800 | OsR498G0100400400.01.T04 | Basic-leucine zipper domain                                                |
| maker-1-augustus-gene-62.0-mRNA-1   | NA | NA       |               | Os01g0212100 | OsR498G0100402100.01.T04 | RNA helicase                                                               |
| maker-1-augustus-gene-62.5-mRNA-1   | NA | NA       |               | Os01g0212400 | OsR498G0100402300.01.T01 | sodium/calcium exchanger NCL                                               |
| maker-1-augustus-gene-64.14-mRNA-1  | NA | NA       |               | 0            | OsR498G0100417100.01.T01 | Auxin-responsive protein IAA2                                              |
| maker-1-augustus-gene-64.16-mRNA-1  | NA | Japonica |               | Os01g0216900 | OsR498G0100417300.01.T01 | GDSL esterase/lipase                                                       |
| maker-1-augustus-gene-64.18-mRNA-1  | NA | NA       |               | Os01g0217100 | OsR498G0100419100.01.T01 |                                                                            |
| maker-1-augustus-gene-64.21-mRNA-1  | NA | NA       |               | Os01g0217300 | OsR498G0100419700.01.T01 | Fruit bromelain                                                            |
| maker-1-augustus-gene-64.24-mRNA-1  | NA | NA       |               | Os01g0217500 | OsR498G0100420900.01.T01 | Class I glutamine amidotransferase-like superfamily protein                |
| maker-1-augustus-gene-64.29-mRNA-1  | NA | NA       |               | Os01g0217000 | OsR498G0100418200.01.T01 | Trichome birefringence-like family                                         |
| maker-1-augustus-gene-64.32-mRNA-1  | NA | Indica   |               | Os01g0330200 | OsR498G0100419400.01.T01 | Putative cysteine protease                                                 |
| maker-1-augustus-gene-64.34-mRNA-1  | NA | NA       |               | 0            | OsR498G0100420000.01.T01 |                                                                            |
| maker-1-augustus-gene-64.4-mRNA-1   | NA | NA       |               | Os01g0216300 | OsR498G0100416500.01.T01 | GDSL esterase/lipase                                                       |
| maker-1-augustus-gene-64.6-mRNA-1   | NA | NA       |               | Os01g0216400 | OsR498G0100416700.01.T02 | GDSL esterase/lipase                                                       |
| maker-1-augustus-gene-64.7-mRNA-1   | NA | Indica   |               | Os01g0216900 | OsR498G0100416700.01.T03 | GDSL esterase/lipase                                                       |
| maker-1-augustus-gene-65.0-mRNA-1   | NA | NA       |               | Os01g0217800 | OsR498G0100422900.01.T01 | Putative 4-methyl-5(B-hydroxyethyl)-thiazol monophosphate biosynthesis e   |
| maker-1-augustus-gene-67.0-mRNA-1   | NA | Indica   |               | Os05g0215600 | OsR498G0100439900.01.T01 | Delta(8)-fatty-acid desaturase-like                                        |
| maker-1-augustus-gene-67.2-mRNA-1   | NA | NA       |               | Os01g0221600 | OsR498G0100440500.01.T08 | Aluminum-activated malate transporter like                                 |
| maker-1-augustus-gene-67.21-mRNA-1  | NA | NA       |               | 0            | OsR498G0100443000.01.T01 | V-type proton ATPase subunit E                                             |
| maker-1-augustus-gene-67.23-mRNA-1  | NA | NA       |               | Os01g0222500 | OsR498G0100443200.01.T02 | Vacuolar ATP synthase subunit E                                            |
| maker-1-augustus-gene-67.25-mRNA-1  | NA | NA       |               | Os01g0222700 |                          | HAT transposon superfamily                                                 |
| maker-1-augustus-gene-67.27-mRNA-1  | NA | Japonica |               | Os01g0223000 | OsR498G0100444200.01.T01 | GDSL esterase/lipase                                                       |
| maker-1-augustus-gene-67.6-mRNA-1   | NA | NA       |               | 0            | OsR498G0100437400.01.T01 | Jasmonic acid-amino acid-conjugating enzyme                                |
| maker-1-augustus-gene-68.34-mRNA-1  | NA | NA       |               | Os01g0223200 | OsR498G0100444800.01.T01 | GDSL esterase/lipase                                                       |
| maker-1-augustus-gene-68.36-mRNA-1  | NA | NA       |               | 0            | OsR498G0100445600.01.T01 | GDSL esterase/lipase                                                       |
| maker-1-augustus-gene-68.38-mRNA-1  | NA | Indica   |               | Os01g0223200 | OsR498G0100446400.01.T02 | ABC transporter D family member 2, chloroplastic (Fragment)                |
| maker-1-augustus-gene-68.41-mRNA-1  | NA | Indica   | Kinase-LRR-TM | Os01g0223600 | OsR498G0100446600.01.T01 | Inactive leucine-rich repeat receptor-like serine/threonine-protein kinase |
| maker-1-augustus-gene-72.27-mRNA-1  | NA | NA       |               | Os01g0229100 | OsR498G0100473000.01.T01 | Eukaryotic translation initiation factor 3 subunit L                       |
| maker-1-augustus-gene-72.7-mRNA-1   | NA | NA       |               | Os01g0229200 | OsR498G0100473100.01.T04 | Putative VHS/GAT domain containing family protein                          |
| maker-1-augustus-gene-74.44-mRNA-1  | NA | NA       |               | Os01g0233400 | OsR498G0100488100.01.T04 | Chromatin modification-related protein Eaf                                 |
| maker-1-augustus-gene-74.58-mRNA-1  | NA | NA       |               | Os01g0233500 | OsR498G0100488600.01.T01 | Cyclin N-terminal domain-containing protein (Fragment)                     |
| maker-1-augustus-gene-8.130-mRNA-1  | NA | Japonica |               | Os01g0115200 | OsR498G1119343800.01.T03 | Amidase signature enzyme                                                   |
| maker-1-augustus-gene-80.46-mRNA-1  | NA | NA       |               | Os01g0243700 | OsR498G0100529000.01.T01 | X8 domain-containing protein (Fragment)                                    |
| maker-1-augustus-gene-80.50-mRNA-1  | NA | Japonica |               | Os01g0243900 | OsR498G0100529200.01.T01 | Zinc finger CCCH domain-containing protein 4                               |
| maker-1-augustus-gene-80.53-mRNA-1  | NA | NA       |               | Os01g0244000 | OsR498G0100529800.01.T02 | Zinc finger CCCH domain-containing protein 4                               |

|                                    |    |          |           |              |                          |                                                                               |
|------------------------------------|----|----------|-----------|--------------|--------------------------|-------------------------------------------------------------------------------|
| maker-1-augustus-gene-80.55-mRNA-1 | NA | NA       |           | Os01g0244400 | OsR498G0100533600.01.T01 | RNA-binding glycine-rich protein-like                                         |
| maker-1-augustus-gene-81.0-mRNA-1  | NA | Japonica |           | Os01g0245600 | OsR498G0510259700.01.T02 |                                                                               |
| maker-1-augustus-gene-81.15-mRNA-1 | NA | NA       |           | Os01g0246500 | OsR498G0100540000.01.T01 | RWP-RK domain-containing protein (Fragment)                                   |
| maker-1-augustus-gene-81.2-mRNA-1  | NA | NA       |           | Os01g0246400 | OsR498G0100539500.01.T01 | High molecular mass early light-inducible protein HV58, chloroplastic         |
| maker-1-augustus-gene-81.4-mRNA-1  | NA | Indica   |           | Os01g0246700 | OsR498G0100541900.01.T01 | WRKY transcription factor                                                     |
| maker-1-augustus-gene-81.8-mRNA-1  | NA | NA       |           | Os01g0245700 |                          |                                                                               |
| maker-1-augustus-gene-82.0-mRNA-1  | NA | NA       |           | Os01g0248300 | OsR498G0100548500.01.T01 | Pathogen-related protein-like                                                 |
| maker-1-augustus-gene-82.12-mRNA-1 | NA | NA       |           | 0            | OsR498G0100545800.01.T02 | Voltage-dependent anion channel                                               |
| maker-1-augustus-gene-82.15-mRNA-1 | NA | NA       |           | Os01g0247900 | OsR498G0100547000.01.T01 | ABA induced plasma membrane protein PM 19                                     |
| maker-1-augustus-gene-82.17-mRNA-1 | NA | NA       |           | Os01g0248500 | OsR498G0100550200.01.T01 | Pathogen-related protein-like                                                 |
| maker-1-augustus-gene-82.2-mRNA-1  | NA | NA       |           | Os01g0248400 | OsR498G0100549900.01.T07 | Peroxisomal isocitrate dehydrogenase [NADP]                                   |
| maker-1-augustus-gene-82.21-mRNA-1 | NA | NA       |           | Os01g0248600 | OsR498G0100550400.01.T04 | DNA replication complex GINS protein PSF2                                     |
| maker-1-augustus-gene-82.23-mRNA-1 | NA | NA       |           | Os01g0248900 | OsR498G0100551800.01.T01 | Expansin                                                                      |
| maker-1-augustus-gene-82.25-mRNA-1 | NA | NA       |           | Os01g0249100 | OsR498G0100552600.01.T01 | Expansin                                                                      |
| maker-1-augustus-gene-82.27-mRNA-1 | NA | NA       |           | Os01g0249200 | OsR498G0100552800.01.T01 | Germin-like protein 5-1                                                       |
| maker-1-augustus-gene-82.29-mRNA-1 | NA | NA       |           | Os01g0249300 | OsR498G0100553200.01.T05 | cAMP-regulated phosphoprotein 19-related protein isoform 2                    |
| maker-1-augustus-gene-82.9-mRNA-1  | NA | NA       | Kinase-TM | Os01g0247500 | OsR498G0100545400.01.T01 | receptor-like serine/threonine-protein kinase At1g78530                       |
| maker-1-augustus-gene-83.34-mRNA-1 | NA | NA       |           | 0            | OsR498G0100554300.01.T01 | HMA domain-containing protein (Fragment)                                      |
| maker-1-augustus-gene-83.36-mRNA-1 | NA | NA       |           | 0            | OsR498G0100554700.01.T02 | HMA domain-containing protein (Fragment)                                      |
| maker-1-augustus-gene-83.38-mRNA-1 | NA | NA       |           | Os01g0250600 | OsR498G0100556300.01.T01 | 40S ribosomal protein S23-1                                                   |
| maker-1-augustus-gene-83.49-mRNA-1 | NA | NA       |           | Os01g0251200 | OsR498G0100557500.01.T02 | RING-type E3 ubiquitin transferase                                            |
| maker-1-augustus-gene-83.52-mRNA-1 | NA | NA       |           | 0            | OsR498G0100556000.01.T04 | Putative transcription factor DP, helitron helicase-like domain-containing pr |
| maker-1-augustus-gene-84.39-mRNA-1 | NA | NA       | Kinase-TM | Os01g0252100 | OsR498G0100559700.01.T07 | Non-specific serine/threonine protein kinase                                  |
| maker-1-augustus-gene-84.44-mRNA-1 | NA | NA       |           | 0            | OsR498G0100559900.01.T02 | Zinc finger CCCH domain-containing protein 3                                  |
| maker-1-augustus-gene-84.49-mRNA-1 | NA | NA       |           | 0            | OsR498G0100560700.01.T01 | Endoplasmic reticulum mannosyl-oligosaccharide 1,2-alpha-mannosidase          |
| maker-1-augustus-gene-84.56-mRNA-1 | NA | Japonica |           | Os01g0252700 | OsR498G1221886900.01.T01 | PlsC domain-containing protein (Fragment)                                     |
| maker-1-augustus-gene-84.58-mRNA-1 | NA | NA       |           | Os01g0253300 | OsR498G0100563300.01.T01 | Importin subunit alpha                                                        |
| maker-1-augustus-gene-84.65-mRNA-1 | NA | Indica   |           | Os01g0253900 | OsR498G0100564900.01.T01 | phospholipase A1 PLIP2, chloroplastic                                         |
| maker-1-augustus-gene-84.68-mRNA-1 | NA | NA       |           | Os01g0252900 | OsR498G0100562400.01.T04 | CCHC-type domain-containing protein                                           |
| maker-1-augustus-gene-84.72-mRNA-1 | NA | NA       | Kinase-TM | Os01g0253100 | OsR498G0100562800.01.T03 | proline-rich receptor-like protein kinase PERK3                               |
| maker-1-augustus-gene-84.79-mRNA-1 | NA | NA       |           | Os01g0253400 | OsR498G0100563600.01.T01 |                                                                               |
| maker-1-augustus-gene-84.81-mRNA-1 | NA | NA       |           | Os01g0253600 | OsR498G0100564400.01.T03 | Pollen-specific protein like                                                  |
| maker-1-augustus-gene-84.83-mRNA-1 | NA | NA       |           | Os01g0253800 | OsR498G0100564600.01.T01 | Glycine-rich protein family                                                   |
| maker-1-augustus-gene-84.85-mRNA-1 | NA | NA       |           | Os01g0254000 | OsR498G0100565800.01.T01 | GTP-binding protein SAR1A                                                     |
| maker-1-augustus-gene-85.32-mRNA-1 | NA | NA       |           | Os01g0255000 | OsR498G0100571700.01.T01 | AB hydrolase-1 domain-containing protein (Fragment)                           |
| maker-1-augustus-gene-85.33-mRNA-1 | NA | Japonica |           | Os01g0255100 | OsR498G0100571700.01.T04 | AB hydrolase-1 domain-containing protein (Fragment)                           |
| maker-1-augustus-gene-85.42-mRNA-1 | NA | NA       |           | 0            | OsR498G0100573900.01.T04 |                                                                               |
| maker-1-augustus-gene-85.45-mRNA-1 | NA | NA       |           | Os01g0254100 | OsR498G0100566200.01.T04 | Topless-related protein 2                                                     |
| maker-1-augustus-gene-85.51-mRNA-1 | NA | Indica   |           | Os01g0254200 | OsR498G0100567600.01.T02 | Werner Syndrome-like exonuclease                                              |
| maker-1-augustus-gene-86.37-mRNA-1 | NA | NA       |           | Os01g0256400 | OsR498G0100576100.01.T02 | Dynein light chain                                                            |
| maker-1-augustus-gene-86.39-mRNA-1 | NA | NA       |           | Os01g0255700 | OsR498G0100575600.01.T01 |                                                                               |
| maker-1-augustus-gene-86.42-mRNA-1 | NA | NA       |           | 0            | OsR498G0100575800.01.T01 |                                                                               |
| maker-1-augustus-gene-86.44-mRNA-1 | NA | NA       |           | 0            | OsR498G0100578400.01.T01 | DEXH-box ATP-dependent RNA helicase                                           |
| maker-1-augustus-gene-86.51-mRNA-1 | NA | NA       |           | Os01g0256900 | OsR498G0100578600.01.T01 | U6 snRNA-associated Sm-like protein LSM4                                      |
| maker-1-augustus-gene-86.54-mRNA-1 | NA | NA       |           | Os01g0257400 | OsR498G0100580800.01.T02 | Zinc finger CCCH domain-containing protein 5                                  |
| maker-1-augustus-gene-87.31-mRNA-1 | NA | NA       |           | Os01g0258600 | OsR498G0100585300.01.T03 | FYVE-type domain-containing protein                                           |
| maker-1-augustus-gene-87.33-mRNA-1 | NA | NA       | Kinase-TM | Os01g0259200 | OsR498G0100587300.01.T01 | Serine/threonine-protein kinase PBL27                                         |
| maker-1-augustus-gene-87.40-mRNA-1 | NA | NA       |           | Os01g0259900 | OsR498G0100589500.01.T01 | Mediator-associated protein 2                                                 |
| maker-1-augustus-gene-87.44-mRNA-1 | NA | NA       |           |              |                          | Plant L-ascorbate oxidase                                                     |
| maker-1-augustus-gene-87.47-mRNA-1 | NA | NA       |           | Os01g0258700 | OsR498G0100585200.01.T01 | Zinc finger CCCH domain-containing protein 6                                  |
| maker-1-augustus-gene-87.52-mRNA-1 | NA | NA       | Kinase-TM | Os01g0259400 | OsR498G0100587800.01.T01 | Serine/threonine-protein kinase RUNKEL                                        |
| maker-1-augustus-gene-87.58-mRNA-1 | NA | NA       |           | Os01g0259600 | OsR498G0100588000.01.T01 | Phosphoadenosine phosphosulfate (PAPS) reductase family protein               |
| maker-1-augustus-gene-88.0-mRNA-1  | NA | NA       |           | 0            | OsR498G0100592100.01.T02 | Transcription factor Pur-alpha 1                                              |
| maker-1-augustus-gene-88.13-mRNA-1 | NA | NA       |           | 0            | OsR498G0100590800.01.T03 | Putative minus-end-directed kinesin ATPase                                    |
| maker-1-augustus-gene-88.18-mRNA-1 | NA | NA       |           | Os01g0261200 | OsR498G0100594800.01.T02 | NAC domain-containing protein 74                                              |
| maker-1-augustus-gene-88.21-mRNA-1 | NA | Japonica |           | Os01g0261600 | OsR498G0100598700.01.T01 | 2-alpha-hydroxytaxane 2-O-benzoyltransferase                                  |
| maker-1-augustus-gene-88.5-mRNA-1  | NA | NA       |           | Os01g0260800 |                          |                                                                               |
| maker-1-augustus-gene-88.7-mRNA-1  | NA | NA       |           | Os01g0261100 | OsR498G0100594500.01.T01 | RING/U-box superfamily protein                                                |
| maker-1-augustus-gene-88.9-mRNA-1  | NA | NA       |           |              |                          | Epimerase domain-containing protein                                           |
| maker-1-augustus-gene-89.0-mRNA-1  | NA | Japonica |           | Os09g0241700 | OsR498G0101011200.01.T01 | Protein kinase domain-containing protein                                      |
| maker-1-augustus-gene-89.15-mRNA-1 | NA | NA       |           | Os01g0263300 | OsR498G0100605100.01.T02 | Peroxidase                                                                    |

|                                      |    |          |           |              |                          |                                                                              |
|--------------------------------------|----|----------|-----------|--------------|--------------------------|------------------------------------------------------------------------------|
| maker-1-augustus-gene-89.19-mRNA-1   | NA | NA       |           | Os01g0262600 | OsR498G0100603200.01.T01 | Lipopolysaccharide core biosynthesis mannosyltransferase lpsB                |
| maker-1-augustus-gene-89.2-mRNA-1    | NA | Japonica |           | Os01g0261600 | OsR498G0100598700.01.T01 | 2-alpha-hydroxytaxane 2-O-benzoyltransferase                                 |
| maker-1-augustus-gene-89.24-mRNA-1   | NA | NA       |           | Os01g0263000 | OsR498G0100603800.01.T01 | Peroxidase                                                                   |
| maker-1-augustus-gene-89.4-mRNA-1    | NA | NA       |           | Os01g0262500 | OsR498G0100602700.01.T01 | TLC domain-containing protein (Fragment)                                     |
| maker-1-augustus-gene-89.7-mRNA-1    | NA | NA       |           | Os01g0262700 | OsR498G0100603300.01.T05 | G-protein coupled receptor                                                   |
| maker-1-augustus-gene-9.103-mRNA-1   | NA | NA       |           | Os01g0116400 | OsR498G0100053600.01.T01 | Receptor kinase                                                              |
| maker-1-augustus-gene-90.41-mRNA-1   | NA | Indica   |           | Os01g0263500 | OsR498G0100605500.01.T02 | Mediator of RNA polymerase II transcription subunit                          |
| maker-1-augustus-gene-90.46-mRNA-1   | NA | NA       |           | 0            | OsR498G0100606100.01.T04 | PsbB mRNA maturation factor Mbb1, chloroplastic                              |
| maker-1-augustus-gene-90.48-mRNA-1   | NA | NA       |           |              |                          | UTP--glucose-1-phosphate uridylyltransferase                                 |
| maker-1-augustus-gene-90.53-mRNA-1   | NA | NA       |           | Os01g0264400 |                          |                                                                              |
| maker-1-augustus-gene-90.55-mRNA-1   | NA | Indica   |           | Os01g0263900 | OsR498G0100606400.01.T01 | Cyclic dof factor 2                                                          |
| maker-1-augustus-gene-91.0-mRNA-1    | NA | NA       |           | Os01g0264500 | OsR498G0100609500.01.T01 | Ankyrin repeat and KH domain-containing protein                              |
| maker-1-augustus-gene-91.12-mRNA-1   | NA | NA       |           | Os01g0264700 | OsR498G0100611400.01.T05 | Random slug protein 5                                                        |
| maker-1-augustus-gene-91.17-mRNA-1   | NA | Indica   |           | Os01g0265100 | OsR498G0100612200.01.T06 | ADP-ribosylation factor homolog1                                             |
| maker-1-augustus-gene-91.21-mRNA-1   | NA | NA       |           | Os01g0265200 | OsR498G0100612600.01.T02 | thylakoid ADP,ATP carrier protein, chloroplastic                             |
| maker-1-augustus-gene-91.29-mRNA-1   | NA | NA       |           | Os01g0265700 | OsR498G0100614000.01.T02 | tRNA (Guanine-N(1)-)-methyltransferase                                       |
| maker-1-augustus-gene-91.32-mRNA-1   | NA | NA       |           | Os01g0265900 | OsR498G0100614600.01.T03 | Translin-associated protein X                                                |
| maker-1-augustus-gene-91.4-mRNA-1    | NA | NA       |           | 0            | OsR498G0100611700.01.T02 | Putative pre-mRNA-splicing factor SPF27-like                                 |
| maker-1-augustus-gene-91.7-mRNA-1    | NA | NA       |           | Os01g0266000 | OsR498G0100614900.01.T01 | HTH La-type RNA-binding domain-containing protein                            |
| maker-1-augustus-gene-92.13-mRNA-1   | NA | NA       |           | Os01g0266500 | OsR498G0100618000.01.T02 | Glutaredoxin-dependent peroxiredoxin                                         |
| maker-1-augustus-gene-92.17-mRNA-1   | NA | NA       |           | Os01g0266600 | OsR498G0100618400.01.T01 | Glutaredoxin-dependent peroxiredoxin                                         |
| maker-1-augustus-gene-92.21-mRNA-1   | NA | NA       |           | Os01g0266800 | OsR498G0100620200.01.T09 | PQ-loop repeat family protein / transmembrane family protein                 |
| maker-1-augustus-gene-92.28-mRNA-1   | NA | NA       |           | Os01g0267400 | OsR498G0100622800.01.T01 | Cadmium resistance protein 10                                                |
| maker-1-augustus-gene-92.3-mRNA-1    | NA | NA       |           | Os01g0267100 | OsR498G0100621700.01.T04 | Methyltransferase-like protein 1                                             |
| maker-1-augustus-gene-92.31-mRNA-1   | NA | NA       |           | Os01g0267600 | OsR498G0100623200.01.T01 | SUN domain-containing protein 1                                              |
| maker-1-augustus-gene-92.8-mRNA-1    | NA | NA       |           | Os01g0267200 | OsR498G0100622100.01.T01 | 26S proteasome regulatory subunit RPN11                                      |
| maker-1-augustus-gene-93.0-mRNA-1    | NA | NA       |           |              |                          | DNA topoisomerase (ATP-hydrolyzing)                                          |
| maker-1-augustus-gene-93.14-mRNA-1   | NA | NA       |           | Os01g0268900 | OsR498G0100628900.01.T03 | MutS                                                                         |
| maker-1-augustus-gene-93.17-mRNA-1   | NA | NA       |           | Os01g0267900 | OsR498G0100625000.01.T01 | Calmodulin                                                                   |
| maker-1-augustus-gene-93.19-mRNA-1   | NA | NA       |           | Os01g0268100 | OsR498G0100625600.01.T02 | Carbohydrate transporter/ sugar porter/ transporter                          |
| maker-1-augustus-gene-93.26-mRNA-1   | NA | NA       |           | Os01g0269000 | OsR498G0100629200.01.T01 | 3-hydroxy-3-methylglutarate-CoA lyase                                        |
| maker-1-augustus-gene-93.29-mRNA-1   | NA | NA       |           | Os01g0269100 | OsR498G0100629400.01.T07 | Rab proteins geranylgeranyltransferase component                             |
| maker-1-augustus-gene-93.6-mRNA-1    | NA | NA       |           | Os01g0268500 | OsR498G0100627900.01.T01 | Sulfoquinovosidase                                                           |
| maker-1-augustus-gene-94.39-mRNA-1   | NA | NA       | CC-NBS-TM | Os01g0269500 | OsR498G0100629900.01.T03 | Putative NBS type R protein                                                  |
| maker-1-augustus-gene-94.41-mRNA-1   | NA | NA       | CC-NBS-TM | Os01g0269800 | OsR498G0100631100.01.T01 | NBS-LRR disease resistance protein-like                                      |
| maker-1-augustus-gene-94.49-mRNA-1   | NA | Indica   | CC-NBS-TM | Os01g0269800 | OsR498G0100630400.01.T01 | Putative NB-ARC domain-containing protein (Fragment)                         |
| maker-1-augustus-gene-94.52-mRNA-1   | NA | NA       |           | Os01g0269900 | OsR498G0100631600.01.T05 | Actin-related protein 6                                                      |
| maker-1-augustus-gene-94.55-mRNA-1   | NA | NA       |           | Os01g0270100 | OsR498G0100632000.01.T01 | Cysteine proteinase inhibitor                                                |
| maker-1-augustus-gene-96.4-mRNA-1    | NA | NA       |           |              |                          | Ulp1 protease family, C-terminal catalytic domain containing protein, expres |
| maker-1-augustus-gene-96.8-mRNA-1    | NA | NA       |           | 0            | OsR498G0509629200.01.T01 |                                                                              |
| maker-1-augustus-gene-98.41-mRNA-1   | NA | NA       |           | Os01g0276800 | OsR498G0100656000.01.T01 | Glucosidase 2 subunit beta                                                   |
| maker-10-augustus-gene-102.11-mRNA-1 | NA | NA       |           | Os02g0443000 | OsR498G0407986600.01.T01 | DNA-directed RNA polymerase subunit beta"                                    |
| maker-10-augustus-gene-103.0-mRNA-1  | NA | NA       |           | Os06g0598500 |                          | Ribulose biphosphate carboxylase large chain                                 |
| maker-10-augustus-gene-103.2-mRNA-1  | NA | NA       |           | 0            | OsR498G1018680400.01.T01 | Cyclic dof factor 2                                                          |
| maker-10-augustus-gene-104.45-mRNA-1 | NA | NA       |           |              |                          | HAT family dimerisation domain containing protein, expressed                 |
| maker-10-augustus-gene-104.47-mRNA-1 | NA | NA       |           | 0            | OsR498G0714121500.01.T01 |                                                                              |
| maker-10-augustus-gene-104.49-mRNA-1 | NA | NA       |           |              |                          | SAC domain-containing protein                                                |
| maker-10-augustus-gene-105.1-mRNA-1  | NA | NA       |           | Os10g0429500 |                          | BTB/POZ domain containing protein, expressed                                 |
| maker-10-augustus-gene-109.0-mRNA-1  | NA | NA       |           | Os10g0437500 | OsR498G1018785700.01.T01 | Usp domain-containing protein (Fragment)                                     |
| maker-10-augustus-gene-109.10-mRNA-1 | NA | NA       |           | Os10g0438500 | OsR498G1018788500.01.T01 | F-box domain containing protein, expressed                                   |
| maker-10-augustus-gene-109.12-mRNA-1 | NA | NA       |           | Os10g0438700 | OsR498G1018789100.01.T02 | Protein preY, mitochondrial                                                  |
| maker-10-augustus-gene-109.14-mRNA-1 | NA | Indica   |           | Os03g0428700 | OsR498G1018790700.01.T01 | Expansin                                                                     |
| maker-10-augustus-gene-109.16-mRNA-1 | NA | NA       |           | Os10g0438000 | OsR498G1018787000.01.T01 | FH protein interacting protein FIP2                                          |
| maker-10-augustus-gene-109.19-mRNA-1 | NA | Japonica |           | Os10g0438300 | OsR498G1018787600.01.T01 |                                                                              |
| maker-10-augustus-gene-109.2-mRNA-1  | NA | NA       |           | Os10g0437600 | OsR498G1018786300.01.T05 | Starch synthase, chloroplastic/amyloplastic                                  |
| maker-10-augustus-gene-109.22-mRNA-1 | NA | NA       |           | Os10g0438600 | OsR498G1018789000.01.T01 | GDSL esterase/lipase EXL3                                                    |
| maker-10-augustus-gene-109.24-mRNA-1 | NA | NA       |           | Os10g0439200 | OsR498G1018791000.01.T01 | Expansin                                                                     |
| maker-10-augustus-gene-109.6-mRNA-1  | NA | NA       |           | Os10g0437900 | OsR498G1018786700.01.T01 | SHSP domain-containing protein                                               |
| maker-10-augustus-gene-11.0-mRNA-1   | NA | NA       |           | 0            | OsR498G1018035800.01.T01 |                                                                              |
| maker-10-augustus-gene-110.38-mRNA-1 | NA | NA       |           | 0            | OsR498G1018792300.01.T04 | Splicing factor, CC1-like family protein, expressed                          |
| maker-10-augustus-gene-110.49-mRNA-1 | NA | NA       |           | Os10g0440000 | OsR498G1018793600.01.T01 | Ent-isokaurene C2-hydroxylase                                                |

|                                      |    |        |               |              |                          |                                                            |
|--------------------------------------|----|--------|---------------|--------------|--------------------------|------------------------------------------------------------|
| maker-10-augustus-gene-110.50-mRNA-1 | NA | NA     |               | Os10g0439800 | OsR498G1018793000.01.T01 | Premnaspodiene oxygenase                                   |
| maker-10-augustus-gene-110.60-mRNA-1 | NA | NA     |               | Os10g0440100 | OsR498G1018794000.01.T02 | Transcription factor-like protein DPB                      |
| maker-10-augustus-gene-111.45-mRNA-1 | NA | NA     |               | Os10g0442900 | OsR498G1018800500.01.T01 | putative white-brown complex homolog protein 30 isoform X1 |
| maker-10-augustus-gene-111.50-mRNA-1 | NA | NA     |               | 0            | OsR498G0305744400.01.T01 |                                                            |
| maker-10-augustus-gene-111.52-mRNA-1 | NA | NA     |               | 0            | OsR498G1018798600.01.T02 | Phosphoglycerate kinase                                    |
| maker-10-augustus-gene-111.57-mRNA-1 | NA | Indica |               | Os10g0442300 | OsR498G1018798800.01.T01 | Glycosyltransferase                                        |
| maker-10-augustus-gene-111.59-mRNA-1 | NA | NA     |               | 0            | OsR498G1018799600.01.T01 | Glycosyltransferase                                        |
| maker-10-augustus-gene-112.41-mRNA-1 | NA | NA     |               | 0            | OsR498G1018807000.01.T01 | General transcription factor 2-related zinc finger protein |
| maker-10-augustus-gene-113.36-mRNA-1 | NA | NA     |               | 0            | OsR498G1018808900.01.T01 |                                                            |
| maker-10-augustus-gene-113.37-mRNA-1 | NA | NA     |               | Os10g0445500 | OsR498G1018810100.01.T02 | HR-like lesion-inducing protein-related                    |
| maker-10-augustus-gene-113.41-mRNA-1 | NA | NA     |               |              |                          | Transmembrane protein like                                 |
| maker-10-augustus-gene-113.43-mRNA-1 | NA | NA     |               |              |                          | Transmembrane protein 8B                                   |
| maker-10-augustus-gene-113.49-mRNA-1 | NA | NA     |               | Os10g0446400 | OsR498G1018812900.01.T01 | ARID domain-containing protein                             |
| maker-10-augustus-gene-113.51-mRNA-1 | NA | NA     |               | Os10g0445400 | OsR498G1018809400.01.T02 | E3 ubiquitin-protein ligase AIRP2                          |
| maker-10-augustus-gene-114.35-mRNA-1 | NA | NA     |               | Os04g0169100 | OsR498G0407621300.01.T01 | Ethylene receptor                                          |
| maker-10-augustus-gene-115.4-mRNA-1  | NA | NA     |               | Os04g0167800 | OsR498G0407614400.01.T01 | Methylecgonone reductase isoform A                         |
| maker-10-augustus-gene-116.44-mRNA-1 | NA | NA     |               | Os04g0165500 |                          | Pheophorbide a oxygenase                                   |
| maker-10-augustus-gene-117.41-mRNA-1 | NA | NA     |               | Os04g0165400 | OsR498G0407603600.01.T01 | Integral membrane HRF1 family protein                      |
| maker-10-augustus-gene-117.53-mRNA-1 | NA | NA     |               |              |                          |                                                            |
| maker-10-augustus-gene-118.0-mRNA-1  | NA | NA     |               | Os04g0162100 | OsR498G0407596300.01.T01 | VEFS-Box domain-containing protein                         |
| maker-10-augustus-gene-121.0-mRNA-1  | NA | NA     |               |              |                          |                                                            |
| maker-10-augustus-gene-121.2-mRNA-1  | NA | NA     |               | Os04g0156200 | OsR498G0407574100.01.T01 |                                                            |
| maker-10-augustus-gene-123.37-mRNA-1 | NA | NA     |               | Os04g0151800 | OsR498G0407558600.01.T04 | Argonaute 4                                                |
| maker-10-augustus-gene-124.33-mRNA-1 | NA | NA     |               | 0            | OsR498G0407550800.01.T01 |                                                            |
| maker-10-augustus-gene-124.37-mRNA-1 | NA | NA     |               | Os04g0150766 | OsR498G0407557500.01.T01 |                                                            |
| maker-10-augustus-gene-124.39-mRNA-1 | NA | NA     |               | 0            | OsR498G0407556900.01.T05 |                                                            |
| maker-10-augustus-gene-124.42-mRNA-1 | NA | NA     |               | 0            | OsR498G0815485900.01.T01 | Cell wall protein-like                                     |
| maker-10-augustus-gene-127.40-mRNA-1 | NA | NA     | Kinase-TM     | Os04g0140400 | OsR498G0407534800.01.T01 | Serine/threonine-protein kinase                            |
| maker-10-augustus-gene-127.41-mRNA-1 | NA | NA     | Kinase-TM     | Os04g0125700 | OsR498G0407534800.01.T01 | Non-specific serine/threonine protein kinase               |
| maker-10-augustus-gene-127.48-mRNA-1 | NA | NA     | Kinase-TM     | Os04g0141200 | OsR498G0407536900.01.T01 | Receptor-like serine/threonine-protein kinase              |
| maker-10-augustus-gene-127.50-mRNA-1 | NA | NA     |               | 0            | OsR498G0407531300.01.T01 | DUF4220 domain-containing protein (Fragment)               |
| maker-10-augustus-gene-127.52-mRNA-1 | NA | NA     |               | Os02g0824700 | OsR498G0407530700.01.T04 | V-type proton ATPase subunit F                             |
| maker-10-augustus-gene-128.26-mRNA-1 | NA | NA     |               | Os04g0137100 | OsR498G0407528100.01.T01 | Pectate lyase                                              |
| maker-10-augustus-gene-131.30-mRNA-1 | NA | NA     |               | 0            | OsR498G0407523100.01.T01 | Histidine decarboxylase                                    |
| maker-10-augustus-gene-132.28-mRNA-1 | NA | NA     | Kinase-TM     | Os04g0125700 | OsR498G0407520700.01.T01 | Agglutinin-2                                               |
| maker-10-augustus-gene-132.30-mRNA-1 | NA | NA     |               | Os04g0134800 | OsR498G0407518700.01.T01 | Peroxidase                                                 |
| maker-10-augustus-gene-133.0-mRNA-1  | NA | NA     |               | Os04g0131900 | OsR498G0407513000.01.T01 | Sterol 3-beta-glucosyltransferase                          |
| maker-10-augustus-gene-133.4-mRNA-1  | NA | NA     |               | Os04g0131900 | OsR498G0407513000.01.T01 | Sterol 3-beta-glucosyltransferase 1                        |
| maker-10-augustus-gene-133.6-mRNA-1  | NA | NA     | Kinase-LRR-TM | Os04g0132500 | OsR498G0407514500.01.T01 | Lrr receptor-like serinethreonine-protein kinase rch1      |
| maker-10-augustus-gene-133.8-mRNA-1  | NA | NA     |               | Os04g0132300 | OsR498G0407513700.01.T03 | A1 cistron-splicing factor, AAR2                           |
| maker-10-augustus-gene-134.0-mRNA-1  | NA | NA     |               | Os04g0120000 |                          | Hydroxyproline-rich glycoprotein-like                      |
| maker-10-augustus-gene-134.6-mRNA-1  | NA | NA     |               | Os04g0129500 | OsR498G0407508500.01.T02 | Sec23/Sec24 protein transport family protein isoform 1     |
| maker-10-augustus-gene-135.0-mRNA-1  | NA | NA     |               | Os04g0129200 | OsR498G0407506800.01.T02 | Werner syndrome ATP-dependent helicase                     |
| maker-10-augustus-gene-135.2-mRNA-1  | NA | NA     |               | Os04g0128900 | OsR498G0407505200.01.T01 | Flavin-containing monooxygenase                            |
| maker-10-augustus-gene-135.4-mRNA-1  | NA | NA     |               | Os04g0129300 | OsR498G0407506900.01.T03 | YTH domain-containing protein (Fragment)                   |
| maker-10-augustus-gene-135.7-mRNA-1  | NA | NA     |               | Os04g0127800 | OsR498G0407501300.01.T01 |                                                            |
| maker-10-augustus-gene-136.29-mRNA-1 | NA | NA     |               | Os04g0127300 | OsR498G0407499700.01.T01 | Subtilisin-like protease SBT3.3                            |
| maker-10-augustus-gene-136.44-mRNA-1 | NA | NA     |               | Os04g0121100 | OsR498G0407492700.01.T01 | Subtilisin-like serine endopeptidase family protein        |
| maker-10-augustus-gene-138.14-mRNA-1 | NA | NA     |               | Os04g0121300 | OsR498G0407492700.01.T01 | Subtilisin-like protein protease SBT3.7                    |
| maker-10-augustus-gene-138.18-mRNA-1 | NA | NA     |               |              |                          | Subtilisin-like protease                                   |
| maker-10-augustus-gene-138.4-mRNA-1  | NA | NA     |               |              |                          | Subtilisin-like protein protease SBT3.3                    |
| maker-10-augustus-gene-139.12-mRNA-1 | NA | NA     |               | Os04g0118500 | OsR498G0407486200.01.T01 | Peptidyl-prolyl cis-trans isomerase                        |
| maker-10-augustus-gene-139.19-mRNA-1 | NA | NA     |               | Os04g0120000 | OsR498G0407490300.01.T02 | Subtilisin-like protein protease SBT3.7                    |
| maker-10-augustus-gene-139.21-mRNA-1 | NA | NA     | LRR-TM        | 0            | OsR498G0407494400.01.T01 | Protein kinase domain-containing protein                   |
| maker-10-augustus-gene-139.24-mRNA-1 | NA | NA     |               | Os04g0119400 | OsR498G0407487700.01.T01 | Pyruvate dehydrogenase E1 component subunit alpha          |
| maker-10-augustus-gene-139.30-mRNA-1 | NA | NA     | CC-NBS-TM     | Os12g0246700 | OsR498G0407486900.01.T01 | NB-ARC domain containing protein, expressed                |
| maker-10-augustus-gene-14.13-mRNA-1  | NA | NA     |               |              |                          |                                                            |
| maker-10-augustus-gene-140.43-mRNA-1 | NA | NA     |               | 0            | OsR498G0407483400.01.T01 | ARF guanine-nucleotide exchange factor like                |
| maker-10-augustus-gene-140.52-mRNA-1 | NA | NA     |               | Os04g0116200 | OsR498G0407478600.01.T01 |                                                            |
| maker-10-augustus-gene-140.54-mRNA-1 | NA | NA     |               | 0            | OsR498G0407485700.01.T01 |                                                            |
| maker-10-augustus-gene-140.56-mRNA-1 | NA | NA     |               | Os04g0118100 | OsR498G0407484900.01.T02 | Amidase domain-containing protein (Fragment)               |

|                                      |    |          |               |              |                          |                                                                        |
|--------------------------------------|----|----------|---------------|--------------|--------------------------|------------------------------------------------------------------------|
| maker-10-augustus-gene-140.60-mRNA-1 | NA | NA       |               | Os04g0117800 | OsR498G0407484500.01.T01 | Amidase domain-containing protein (Fragment)                           |
| maker-10-augustus-gene-140.63-mRNA-1 | NA | NA       |               | Os04g0117600 | OsR498G0407484100.01.T01 | tRNA-dihydrouridine synthase                                           |
| maker-10-augustus-gene-140.65-mRNA-1 | NA | NA       |               | Os04g0116600 | OsR498G0407480900.01.T02 | Very-long-chain 3-oxoacyl-CoA reductase 1                              |
| maker-10-augustus-gene-141.0-mRNA-1  | NA | NA       |               | 0            | OsR498G0407475000.01.T01 | Putative leucine rich repeat                                           |
| maker-10-augustus-gene-141.2-mRNA-1  | NA | NA       |               |              |                          | Transposon protein, putative, Mutator sub-class                        |
| maker-10-augustus-gene-141.6-mRNA-1  | NA | NA       |               | Os04g0115500 | OsR498G0407466700.01.T01 | Neurotrophin receptor-interacting factor like                          |
| maker-10-augustus-gene-141.8-mRNA-1  | NA | NA       |               | 0            | OsR498G0407466300.01.T02 | G patch domain-containing protein 8                                    |
| maker-10-augustus-gene-143.0-mRNA-1  | NA | NA       |               | Os04g0112300 | OsR498G0407453400.01.T02 | tRNA (adenine(58)-N(1))-methyltransferase non-catalytic subunit TRM6   |
| maker-10-augustus-gene-144.32-mRNA-1 | NA | NA       | CC-LRR-NBS-TM | Os04g0111900 | OsR498G0407452000.01.T01 | Putative NB-ARC domain-containing protein (Fragment)                   |
| maker-10-augustus-gene-144.34-mRNA-1 | NA | NA       |               | Os03g0743900 | OsR498G0407449600.01.T01 | Sulfate adenyllyltransferase                                           |
| maker-10-augustus-gene-145.10-mRNA-1 | NA | NA       | Kinase-TM     | Os04g0109100 | OsR498G0407442600.01.T01 | Non-specific serine/threonine protein kinase                           |
| maker-10-augustus-gene-145.19-mRNA-1 | NA | NA       |               | Os04g0109900 | OsR498G0407445500.01.T01 | Exostosin domain-containing protein (Fragment)                         |
| maker-10-augustus-gene-146.35-mRNA-1 | NA | NA       |               | Os04g0107700 | OsR498G0407435800.01.T01 | Ananain                                                                |
| maker-10-augustus-gene-146.37-mRNA-1 | NA | NA       |               | 0            | OsR498G0407441900.01.T01 | Alpha-humulene synthase                                                |
| maker-10-augustus-gene-146.39-mRNA-1 | NA | NA       |               | Os02g0831200 | OsR498G0407438700.01.T01 | Large ribosomal RNA subunit accumulation protein YCED 1, chloroplastic |
| maker-10-augustus-gene-146.42-mRNA-1 | NA | NA       |               | Os09g0482610 | OsR498G0407437300.01.T01 | Heat shock protein 2                                                   |
| maker-10-augustus-gene-146.44-mRNA-1 | NA | NA       |               | Os04g0107500 | OsR498G0407430900.01.T02 | Glyoxylatehydroxypyruvate reductase hpr3                               |
| maker-10-augustus-gene-147.40-mRNA-1 | NA | NA       |               | Os04g0107200 | OsR498G0407434400.01.T01 | Glyoxylate/hydroxypyruvate reductase HPR3                              |
| maker-10-augustus-gene-147.51-mRNA-1 | NA | NA       |               | 0            | OsR498G0407431100.01.T01 |                                                                        |
| maker-10-augustus-gene-147.53-mRNA-1 | NA | NA       |               | Os04g0106400 | OsR498G0407430900.01.T02 | Glyoxylate/hydroxypyruvate reductase HPR3                              |
| maker-10-augustus-gene-147.56-mRNA-1 | NA | NA       |               | Os04g0106300 | OsR498G0407430700.01.T01 | Mitochondrion arginase                                                 |
| maker-10-augustus-gene-148.37-mRNA-1 | NA | NA       |               | Os04g0104900 | OsR498G0407425700.01.T01 | Putative inactive methyltransferase                                    |
| maker-10-augustus-gene-149.19-mRNA-1 | NA | NA       |               | Os04g0103300 | OsR498G0407420000.01.T01 | Rhomboid-like protein 19                                               |
| maker-10-augustus-gene-149.23-mRNA-1 | NA | NA       |               | Os04g0103200 | OsR498G0407419600.01.T01 | Eukaryotic translation initiation factor 3 subunit M                   |
| maker-10-augustus-gene-149.28-mRNA-1 | NA | NA       |               | Os04g0102700 | OsR498G0407418200.01.T01 | Amidase                                                                |
| maker-10-augustus-gene-149.33-mRNA-1 | NA | NA       |               | 0            | OsR498G0407418000.01.T01 | SAP-like protein BP-73-like                                            |
| maker-10-augustus-gene-149.37-mRNA-1 | NA | NA       |               | Os04g0103100 | OsR498G0407419100.01.T01 | Glycosyltransferases                                                   |
| maker-10-augustus-gene-149.40-mRNA-1 | NA | NA       |               | 0            | OsR498G0407417700.01.T01 | Phosphoglycerate mutase-like protein 1                                 |
| maker-10-augustus-gene-15.14-mRNA-1  | NA | Indica   |               | Os03g0239000 | OsR498G1018051400.01.T01 | Xyloglucan endotransglucosylase/hydrolase                              |
| maker-10-augustus-gene-15.18-mRNA-1  | NA | NA       |               |              |                          |                                                                        |
| maker-10-augustus-gene-15.3-mRNA-1   | NA | NA       |               | Os10g0116800 | OsR498G1018050700.01.T01 | Purple acid phosphatase                                                |
| maker-10-augustus-gene-150.28-mRNA-1 | NA | NA       |               | Os04g0101800 | OsR498G0407414400.01.T02 | Putative ADP-ribosylation factor GTPase-activating protein AGD5        |
| maker-10-augustus-gene-150.30-mRNA-1 | NA | NA       |               | Os04g0101400 | OsR498G0407413200.01.T01 | 3,9-dihydroxypterocarpan 6A-monooxygenase                              |
| maker-10-augustus-gene-150.32-mRNA-1 | NA | NA       |               | Os04g0101700 | OsR498G0407414100.01.T03 | ELMO domain-containing protein A                                       |
| maker-10-augustus-gene-150.39-mRNA-1 | NA | NA       |               | 0            | OsR498G0407412900.01.T03 | MRG domain-containing protein                                          |
| maker-10-augustus-gene-151.35-mRNA-1 | NA | NA       |               | 0            | OsR498G0816152000.01.T01 |                                                                        |
| maker-10-augustus-gene-151.37-mRNA-1 | NA | NA       |               | 0            | OsR498G0407410600.01.T01 | FH2 domain-containing protein (Fragment)                               |
| maker-10-augustus-gene-156.0-mRNA-1  | NA | NA       |               | Os10g0452800 | OsR498G1018829400.01.T03 | KRR-R motif-containing protein 1                                       |
| maker-10-augustus-gene-158.24-mRNA-1 | NA | Indica   |               | Os10g0457000 | OsR498G1018839900.01.T02 | Splicing factor 3B subunit like                                        |
| maker-10-augustus-gene-158.29-mRNA-1 | NA | NA       |               | Os10g0457400 | OsR498G1018841300.01.T01 | Shugoshin, C-terminal                                                  |
| maker-10-augustus-gene-158.32-mRNA-1 | NA | NA       |               | Os10g0457600 | OsR498G1018841900.01.T01 | 3-ketoacyl-CoA thiolase 2 peroxisomal                                  |
| maker-10-augustus-gene-158.39-mRNA-1 | NA | NA       |               | Os10g0457700 | OsR498G1018842700.01.T02 | ATP-dependent helicase ATRX                                            |
| maker-10-augustus-gene-158.65-mRNA-1 | NA | Indica   |               | Os10g0457200 | OsR498G1018840200.01.T01 | Pectate lyase                                                          |
| maker-10-augustus-gene-159.0-mRNA-1  | NA | NA       |               | Os10g0458700 | OsR498G1018845900.01.T03 | RNase H domain-containing protein (Fragment)                           |
| maker-10-augustus-gene-159.5-mRNA-1  | NA | NA       |               | Os08g0402700 | OsR498G1221669700.01.T01 |                                                                        |
| maker-10-augustus-gene-159.7-mRNA-1  | NA | NA       |               |              |                          | ATP-dependent DNA helicase                                             |
| maker-10-augustus-gene-160.0-mRNA-1  | NA | Japonica |               | Os10g0460500 | OsR498G1018849700.01.T01 |                                                                        |
| maker-10-augustus-gene-160.14-mRNA-1 | NA | NA       |               | Os10g0462300 | OsR498G1018854400.01.T02 |                                                                        |
| maker-10-augustus-gene-160.3-mRNA-1  | NA | NA       |               | Os04g0471100 |                          | CAI-1 autoinducer sensor kinase/phosphatase cqsS isoform 1             |
| maker-10-augustus-gene-160.6-mRNA-1  | NA | Indica   |               | Os10g0461100 | OsR498G1018850800.01.T01 | PsbP family protein, expressed                                         |
| maker-10-augustus-gene-160.9-mRNA-1  | NA | NA       |               | Os10g0461100 | OsR498G1018853400.01.T01 | Photosystem II PsbP, oxygen evolving complex                           |
| maker-10-augustus-gene-161.40-mRNA-1 | NA | NA       |               | Os10g0462900 | OsR498G1018856700.01.T01 | Mitochondrial chaperonin-60                                            |
| maker-10-augustus-gene-161.46-mRNA-1 | NA | Japonica |               | Os10g0463100 | OsR498G0305217400.01.T06 | CysteinyI-tRNA synthetase                                              |
| maker-10-augustus-gene-161.48-mRNA-1 | NA | NA       |               | Os10g0463200 | OsR498G1018857700.01.T01 | Gdsl esterasellipase                                                   |
| maker-10-augustus-gene-161.50-mRNA-1 | NA | NA       |               | Os10g0463300 | OsR498G1018857900.01.T01 | Usp domain-containing protein                                          |
| maker-10-augustus-gene-161.52-mRNA-1 | NA | NA       |               | 0            | OsR498G1018858200.01.T01 | Early heading date 1 (Fragment)                                        |
| maker-10-augustus-gene-162.49-mRNA-1 | NA | Indica   |               | Os05g0112000 | OsR498G1018864100.01.T01 | E3 ubiquitin-protein like                                              |
| maker-10-augustus-gene-162.53-mRNA-1 | NA | Indica   |               | Os10g0465900 | OsR498G1018865700.01.T02 | PfkB domain-containing protein                                         |
| maker-10-augustus-gene-162.59-mRNA-1 | NA | NA       |               | Os10g0463800 | OsR498G1018861400.01.T04 | Purine catabolism regulatory protein                                   |
| maker-10-augustus-gene-162.63-mRNA-1 | NA | NA       |               | Os10g0464000 | OsR498G1018861800.01.T01 | Hypersensitive-induced response protein 1                              |
| maker-10-augustus-gene-162.76-mRNA-1 | NA | NA       |               | Os10g0464500 | OsR498G1018862600.01.T02 | E3 ubiquitin-protein ligase WAV3-like isoform X1                       |

|                                      |    |          |               |              |                          |                                                                            |
|--------------------------------------|----|----------|---------------|--------------|--------------------------|----------------------------------------------------------------------------|
| maker-10-augustus-gene-162.78-mRNA-1 | NA | Indica   |               | Os10g0465000 | OsR498G1018863400.01.T04 | WD repeat-containing protein 26                                            |
| maker-10-augustus-gene-162.84-mRNA-1 | NA | NA       |               | Os10g0465800 | OsR498G1018865600.01.T01 | 60S ribosomal protein L21 isoform 1                                        |
| maker-10-augustus-gene-162.86-mRNA-1 | NA | Indica   |               | Os10g0466000 | OsR498G1018866000.01.T03 | RPM1 interacting protein 13                                                |
| maker-10-augustus-gene-163.0-mRNA-1  | NA | NA       |               | 0            | OsR498G1018866300.01.T02 | tRNA dimethylallyltransferase                                              |
| maker-10-augustus-gene-163.16-mRNA-1 | NA | NA       |               | Os10g0467800 | OsR498G1018869900.01.T01 | Cellulose synthase                                                         |
| maker-10-augustus-gene-163.19-mRNA-1 | NA | NA       |               | Os10g0466300 | OsR498G1018866800.01.T01 | U-box domain-containing protein 72                                         |
| maker-10-augustus-gene-163.28-mRNA-1 | NA | Indica   | Kinase-LRR-TM | Os10g0467900 | OsR498G1018870200.01.T01 | Receptor protein kinase                                                    |
| maker-10-augustus-gene-163.4-mRNA-1  | NA | NA       |               | 0            | OsR498G1018867100.01.T03 | CCT motif family protein, expressed                                        |
| maker-10-augustus-gene-163.8-mRNA-1  | NA | NA       |               |              |                          | Peroxisome biogenesis protein 12                                           |
| maker-10-augustus-gene-164.25-mRNA-1 | NA | NA       | Kinase-LRR-TM | Os10g0468500 | OsR498G1018872900.01.T01 | MDIS1-interacting receptor like kinase 2                                   |
| maker-10-augustus-gene-164.29-mRNA-1 | NA | Japonica | LRR-TM        | Os10g0469600 | OsR498G1018872900.01.T01 | MDIS1-interacting receptor like kinase 2                                   |
| maker-10-augustus-gene-165.0-mRNA-1  | NA | NA       |               | Os10g0470700 | OsR498G1018878300.01.T02 | Putative proton-dependent oligopeptide or low-affinity nitrate transporter |
| maker-10-augustus-gene-165.7-mRNA-1  | NA | NA       |               | Os10g0470900 | OsR498G1018879700.01.T01 | Heteroproteinous nuclear ribonucleoprotein 1                               |
| maker-10-augustus-gene-165.9-mRNA-1  | NA | Indica   |               | Os03g0138600 | OsR498G1018880100.01.T01 | DUF810 domain-containing protein                                           |
| maker-10-augustus-gene-169.48-mRNA-1 | NA | NA       |               | Os09g0348800 | OsR498G1221562500.01.T02 | Proline rich 12b                                                           |
| maker-10-augustus-gene-17.38-mRNA-1  | NA | NA       |               | Os10g0122600 | OsR498G1018067200.01.T01 | Phosphatidylinositol/phosphatidylcholine transfer protein SFH10            |
| maker-10-augustus-gene-177.21-mRNA-1 | NA | NA       |               | 0            | OsR498G0714849700.01.T01 | L10-interacting MYB domain-containing protein                              |
| maker-10-augustus-gene-177.23-mRNA-1 | NA | NA       |               | Os10g0170600 |                          | Putative AC transposase                                                    |
| maker-10-augustus-gene-177.4-mRNA-1  | NA | NA       |               | 0            | OsR498G0714849700.01.T01 | L10-interacting MYB domain-containing protein                              |
| maker-10-augustus-gene-178.56-mRNA-1 | NA | NA       |               |              |                          | Far-red impaired response-like                                             |
| maker-10-augustus-gene-183.58-mRNA-1 | NA | NA       |               | Os10g0502900 | OsR498G1019001400.01.T02 | F-box/LRR-repeat protein At3g48880                                         |
| maker-10-augustus-gene-23.39-mRNA-1  | NA | NA       |               | Os10g0132300 | OsR498G1018098400.01.T01 | Jacalin-like lectin domain containing protein, expressed                   |
| maker-10-augustus-gene-27.0-mRNA-1   | NA | NA       |               | Os10g0138600 | OsR498G1018113700.01.T01 | F-box domain containing protein, expressed                                 |
| maker-10-augustus-gene-27.2-mRNA-1   | NA | NA       |               | 0            | OsR498G1018116900.01.T01 | F-box domain containing protein, expressed                                 |
| maker-10-augustus-gene-28.0-mRNA-1   | NA | NA       |               | Os10g0141900 | OsR498G1018123300.01.T02 | Queuine tRNA-ribosyltransferase accessory subunit 2                        |
| maker-10-augustus-gene-28.14-mRNA-1  | NA | NA       |               |              |                          | Putative alpha-mannosidase                                                 |
| maker-10-augustus-gene-28.6-mRNA-1   | NA | NA       |               | Os10g0142100 | OsR498G1018123500.01.T03 | Zinc finger, C3HC4 type family protein, expressed                          |
| maker-10-augustus-gene-3.24-mRNA-1   | NA | Indica   |               | Os07g0248800 | OsR498G1018004100.01.T01 |                                                                            |
| maker-10-augustus-gene-30.2-mRNA-1   | NA | NA       |               | Os10g0144800 |                          | F-box domain-containing protein                                            |
| maker-10-augustus-gene-30.6-mRNA-1   | NA | NA       | LRR-TM        | Os12g0210400 | OsR498G1018135400.01.T02 | probable leucine-rich repeat receptor-like protein kinase At5g49770        |
| maker-10-augustus-gene-31.0-mRNA-1   | NA | Indica   |               | Os03g0244200 | OsR498G1018140100.01.T01 | Thaumatococcus-like protein 1                                              |
| maker-10-augustus-gene-31.2-mRNA-1   | NA | NA       |               | Os10g0147400 | OsR498G1018142600.01.T01 | Auxin influx carrier                                                       |
| maker-10-augustus-gene-32.0-mRNA-1   | NA | NA       |               | Os10g0148400 | OsR498G1018147200.01.T01 | Peptide transporter PTR5                                                   |
| maker-10-augustus-gene-32.4-mRNA-1   | NA | NA       |               |              |                          | F-box domain-containing protein                                            |
| maker-10-augustus-gene-32.8-mRNA-1   | NA | NA       |               | Os10g0149000 | OsR498G1018148800.01.T01 | Proline-rich protein, putative, expressed                                  |
| maker-10-augustus-gene-32.9-mRNA-1   | NA | Indica   |               | Os10g0149200 | OsR498G1018149000.01.T01 | Proline-rich protein, putative, expressed                                  |
| maker-10-augustus-gene-33.23-mRNA-1  | NA | Japonica |               | Os10g0149400 | OsR498G1018150600.01.T01 | Proline-rich protein, putative, expressed                                  |
| maker-10-augustus-gene-33.24-mRNA-1  | NA | NA       |               | Os10g0149800 | OsR498G1018151400.01.T01 | Proline-rich protein, putative, expressed                                  |
| maker-10-augustus-gene-34.0-mRNA-1   | NA | NA       |               | Os10g0149900 | OsR498G1018151500.01.T01 | Proline-rich protein, putative, expressed                                  |
| maker-10-augustus-gene-37.30-mRNA-1  | NA | NA       |               | 0            | OsR498G1018165700.01.T03 | Nuclear pore complex protein Nup188a                                       |
| maker-10-augustus-gene-37.44-mRNA-1  | NA | NA       |               | Os10g0155500 | OsR498G1018169000.01.T01 | Aldose 1-epimerase                                                         |
| maker-10-augustus-gene-38.0-mRNA-1   | NA | Indica   | Kinase-LRR-TM | Os10g0155800 | OsR498G1018171900.01.T01 | Leucine-rich repeat receptor-like protein kinase PEPR1                     |
| maker-10-augustus-gene-38.2-mRNA-1   | NA | NA       |               |              |                          | FAR1 domain-containing protein                                             |
| maker-10-augustus-gene-39.25-mRNA-1  | NA | NA       |               | Os10g0158400 | OsR498G1018181100.01.T01 | Putative chalcone synthase                                                 |
| maker-10-augustus-gene-47.26-mRNA-1  | NA | Indica   |               | Os10g0166600 | OsR498G1018232300.01.T01 | Geraniol 8-hydroxylase                                                     |
| maker-10-augustus-gene-48.33-mRNA-1  | NA | NA       |               |              |                          |                                                                            |
| maker-10-augustus-gene-49.0-mRNA-1   | NA | Indica   |               | Os10g0166600 | OsR498G1018238900.01.T02 | Cytochrome P450 family 76 subfamily C polypeptide 7                        |
| maker-10-augustus-gene-49.12-mRNA-1  | NA | Indica   |               | Os10g0167300 | OsR498G1018239200.01.T05 | Phosphopyruvate hydratase                                                  |
| maker-10-augustus-gene-49.2-mRNA-1   | NA | Japonica |               | Os10g0167500 | OsR498G1018239500.01.T02 | RNA recognition motif family protein, expressed                            |
| maker-10-augustus-gene-49.20-mRNA-1  | NA | NA       |               | 0            | OsR498G1018239800.01.T03 | DNA photolyase                                                             |
| maker-10-augustus-gene-50.6-mRNA-1   | NA | NA       |               | Os10g0170000 | OsR498G1018249900.01.T01 | Nucleotide-sensitive chloride conductance regulator                        |
| maker-10-augustus-gene-52.4-mRNA-1   | NA | Indica   |               | Os06g0725100 | OsR498G1018255800.01.T02 | GDSL esterase/lipase                                                       |
| maker-10-augustus-gene-53.27-mRNA-1  | NA | NA       |               | 0            | OsR498G1018257500.01.T01 | Wall-associated receptor kinase 2                                          |
| maker-10-augustus-gene-54.2-mRNA-1   | NA | NA       |               | Os10g0174800 |                          | Wall-associated receptor kinase 1                                          |
| maker-10-augustus-gene-56.23-mRNA-1  | NA | Indica   |               | Os10g0178200 | OsR498G1018269500.01.T01 | Maternal effect embryo arrest 60                                           |
| maker-10-augustus-gene-56.31-mRNA-1  | NA | Indica   | Kinase-TM     | Os10g0180800 | OsR498G1018272600.01.T01 | Calcium binding EGF domain containing protein, expressed                   |
| maker-10-augustus-gene-57.30-mRNA-1  | NA | NA       |               | Os10g0180000 | OsR498G1018274200.01.T03 | Exostosin domain-containing protein                                        |
| maker-10-augustus-gene-58.36-mRNA-1  | NA | NA       |               | Os10g0181600 | OsR498G1018281900.01.T02 | CMV 1a interacting protein 1                                               |
| maker-10-augustus-gene-58.47-mRNA-1  | NA | Japonica |               | Os10g0181200 | OsR498G1018281600.01.T07 | Pentatricopeptide repeat                                                   |
| maker-10-augustus-gene-61.19-mRNA-1  | NA | NA       | CC-Kinase-TM  | Os03g0251700 | OsR498G0305588100.01.T01 | Receptor-like serine/threonine-protein kinase                              |
| maker-10-augustus-gene-63.22-mRNA-1  | NA | NA       |               | Os10g0189100 | OsR498G1018314600.01.T01 | Phosphoglucomutase (alpha-D-glucose-1,6-bisphosphate-dependent)            |

|                                      |    |          |               |              |                          |                                                                        |
|--------------------------------------|----|----------|---------------|--------------|--------------------------|------------------------------------------------------------------------|
| maker-10-augustus-gene-63.27-mRNA-1  | NA | NA       |               | Os10g0189100 | OsR498G1018314600.01.T02 | Phosphoglucomutase (alpha-D-glucose-1,6-bisphosphate-dependent)        |
| maker-10-augustus-gene-64.14-mRNA-1  | NA | NA       |               | Os08g0271600 |                          |                                                                        |
| maker-10-augustus-gene-64.16-mRNA-1  | NA | NA       |               | Os10g0190100 | OsR498G1018320200.01.T01 | Sulfotransferase                                                       |
| maker-10-augustus-gene-64.18-mRNA-1  | NA | NA       |               | Os10g0190500 | OsR498G1018321600.01.T03 | DUF4220 domain-containing protein (Fragment)                           |
| maker-10-augustus-gene-64.20-mRNA-1  | NA | NA       |               | 0            | OsR498G1018323800.01.T01 | Putative proline-rich cell wall protein                                |
| maker-10-augustus-gene-66.2-mRNA-1   | NA | NA       |               | Os10g0193500 | OsR498G1018329300.01.T01 | AAI domain-containing protein                                          |
| maker-10-augustus-gene-66.3-mRNA-1   | NA | NA       |               | Os10g0194200 | OsR498G1018331900.01.T06 | Cinnamyl alcohol dehydrogenase                                         |
| maker-10-augustus-gene-66.8-mRNA-1   | NA | NA       |               |              |                          | Replication protein A DNA-binding subunit B                            |
| maker-10-augustus-gene-67.21-mRNA-1  | NA | NA       |               |              |                          | Protein DETOXIFICATION                                                 |
| maker-10-augustus-gene-68.35-mRNA-1  | NA | NA       |               | 0            | OsR498G1221332900.01.T01 | Retrotransposon protein, putative, unclassified                        |
| maker-10-augustus-gene-68.37-mRNA-1  | NA | NA       |               | Os05g0267732 | OsR498G0510213400.01.T01 |                                                                        |
| maker-10-augustus-gene-70.0-mRNA-1   | NA | NA       |               | Os10g0195600 | OsR498G1018336100.01.T01 | Benzyl alcohol O-benzoyltransferase                                    |
| maker-10-augustus-gene-71.21-mRNA-1  | NA | Indica   |               | Os05g0494000 | OsR498G1018339300.01.T01 | Coumaroyl shikimate 3-hydroxylase 2                                    |
| maker-10-augustus-gene-72.39-mRNA-1  | NA | Indica   |               | Os10g0196100 | OsR498G1018339300.01.T01 | Coumaroyl shikimate 3-hydroxylase 2                                    |
| maker-10-augustus-gene-73.33-mRNA-1  | NA | NA       |               | Os10g0198600 | OsR498G1018343700.01.T03 | LENR2 domain-containing protein (Fragment)                             |
| maker-10-augustus-gene-73.49-mRNA-1  | NA | NA       |               | Os10g0198100 | OsR498G1018341600.01.T01 |                                                                        |
| maker-10-augustus-gene-73.51-mRNA-1  | NA | NA       |               |              |                          | Mevalonate kinase                                                      |
| maker-10-augustus-gene-74.5-mRNA-1   | NA | Indica   |               | Os10g0199500 | OsR498G1018348300.01.T03 |                                                                        |
| maker-10-augustus-gene-77.22-mRNA-1  | NA | NA       |               | 0            | OsR498G1018358200.01.T02 |                                                                        |
| maker-10-augustus-gene-77.27-mRNA-1  | NA | NA       |               | Os10g0203000 | OsR498G1018362600.01.T01 | Calcium-binding endonuclease/exonuclease/phosphatase family            |
| maker-10-augustus-gene-78.7-mRNA-1   | NA | NA       |               | Os10g0204400 | OsR498G1018371000.01.T02 | Phosphoenolpyruvate carboxykinase (ATP)                                |
| maker-10-augustus-gene-79.25-mRNA-1  | NA | NA       |               | Os10g0205200 | OsR498G1018374100.01.T02 | Ubiquitin-fold modifier-conjugating enzyme 1                           |
| maker-10-augustus-gene-79.30-mRNA-1  | NA | NA       |               |              |                          | Pleiotropic drug resistance ABC transporter                            |
| maker-10-augustus-gene-79.33-mRNA-1  | NA | NA       |               | 0            | OsR498G0100876000.01.T01 | Transposon protein, putative, Mutator sub-class                        |
| maker-10-augustus-gene-79.36-mRNA-1  | NA | NA       |               | Os10g0205300 | OsR498G1018374400.01.T03 | Glycosyltransferases                                                   |
| maker-10-augustus-gene-79.39-mRNA-1  | NA | NA       |               | Os10g0205700 | OsR498G1018376400.01.T02 | Pollen Ole e 1 allergen and extensin family protein                    |
| maker-10-augustus-gene-80.0-mRNA-1   | NA | NA       |               | Os10g0206500 | OsR498G1018378900.01.T01 | Pollen Ole e 1 allergen and extensin family protein                    |
| maker-10-augustus-gene-80.3-mRNA-1   | NA | NA       |               | Os10g0206800 | OsR498G1018380100.01.T08 | Protein DETOXIFICATION                                                 |
| maker-10-augustus-gene-81.5-mRNA-1   | NA | Indica   |               | Os02g0586400 | OsR498G1018385400.01.T01 | GTP-binding 2                                                          |
| maker-10-augustus-gene-82.0-mRNA-1   | NA | NA       |               | 0            | OsR498G1018387300.01.T05 | Oxoglutarate/iron-dependent dioxygenase                                |
| maker-10-augustus-gene-82.2-mRNA-1   | NA | Japonica |               | Os10g0208600 | OsR498G1018387600.01.T01 | Pollen Ole e 1 allergen and extensin family protein                    |
| maker-10-augustus-gene-83.3-mRNA-1   | NA | NA       |               | Os10g0464400 | OsR498G1018862400.01.T01 | Riboflavin kinase                                                      |
| maker-10-augustus-gene-84.0-mRNA-1   | NA | NA       |               | Os10g0209700 | OsR498G1018391500.01.T01 | Heavy metal-associated isoprenylated plant protein 8                   |
| maker-10-augustus-gene-84.4-mRNA-1   | NA | NA       |               | Os10g0210500 | OsR498G1018393600.01.T03 | EamA domain-containing protein                                         |
| maker-10-augustus-gene-87.32-mRNA-1  | NA | Indica   |               | Os10g0214400 | OsR498G1018396800.01.T03 | Putative arginine and glutamate-rich protein                           |
| maker-10-augustus-gene-87.34-mRNA-1  | NA | Japonica |               | Os10g0213800 | OsR498G1018399600.01.T05 |                                                                        |
| maker-10-augustus-gene-9.36-mRNA-1   | NA | NA       |               |              |                          | Transposon protein, putative, Mutator sub-class, expressed             |
| maker-10-augustus-gene-90.0-mRNA-1   | NA | NA       |               | Os10g0254720 | OsR498G1018408000.01.T01 | TRICHOME BIREFRINGENCE-LIKE 8                                          |
| maker-10-augustus-gene-91.0-mRNA-1   | NA | NA       |               | 0            | OsR498G1018396800.01.T02 | Arginine and glutamate-rich protein 1                                  |
| maker-10-augustus-gene-92.20-mRNA-1  | NA | NA       |               | Os10g0254720 | OsR498G1018408000.01.T01 | Trichome birefringence-like                                            |
| maker-10-augustus-gene-94.0-mRNA-1   | NA | NA       |               | Os10g0315400 | OsR498G1018411100.01.T04 | ELKS/Rab6-interacting/CAST family protein                              |
| maker-10-augustus-gene-96.27-mRNA-1  | NA | NA       |               | Os10g0316400 | OsR498G1018414400.01.T01 |                                                                        |
| maker-10-augustus-gene-99.36-mRNA-1  | NA | NA       |               | Os10g0320100 | OsR498G1018427100.01.T02 | Flavonoid 3'-monooxygenase                                             |
| maker-10-augustus-gene-99.38-mRNA-1  | NA | NA       |               | Os10g0320400 | OsR498G1018427700.01.T01 | ATP synthase subunit gamma mitochondrial                               |
| maker-11-augustus-gene-0.0-mRNA-1    | NA | NA       |               | 0            | OsR498G1119277500.01.T04 | Mitochondrial trans-2-enoyl-CoA reductase                              |
| maker-11-augustus-gene-0.11-mRNA-1   | NA | NA       |               | Os12g0102300 | OsR498G1119278000.01.T03 | WRKY DNA binding domain containing protein, expressed                  |
| maker-11-augustus-gene-0.4-mRNA-1    | NA | NA       |               | 0            | OsR498G1119277700.01.T02 | LisH dimerization motif                                                |
| maker-11-augustus-gene-0.8-mRNA-1    | NA | NA       |               | Os12g0108000 | OsR498G1119298500.01.T01 | Laccase                                                                |
| maker-11-augustus-gene-1.53-mRNA-1   | NA | NA       |               | Os11g0117400 | OsR498G1119327000.01.T01 | WRKY DNA binding domain containing protein, expressed                  |
| maker-11-augustus-gene-10.65-mRNA-1  | NA | Indica   |               | Os11g0137300 | OsR498G1119384600.01.T01 | Proteasome stabiliser ECM29                                            |
| maker-11-augustus-gene-115.36-mRNA-1 | NA | NA       |               | Os11g0435500 |                          | Galactinol--sucrose galactosyltransferase                              |
| maker-11-augustus-gene-118.30-mRNA-1 | NA | NA       |               | Os11g0440200 | OsR498G1120037500.01.T01 | GDA1/CD39 family protein, expressed                                    |
| maker-11-augustus-gene-118.36-mRNA-1 | NA | NA       |               | Os11g0440200 | OsR498G1120037500.01.T01 | GDA1/CD39 family protein, expressed                                    |
| maker-11-augustus-gene-12.69-mRNA-1  | NA | NA       |               | 0            | OsR498G1119395800.01.T01 | Cytochrome C biogenesis protein, transmembrane domain containing prote |
| maker-11-augustus-gene-122.25-mRNA-1 | NA | Indica   |               | Os11g0446500 | OsR498G1120055700.01.T02 | Phospholipid-transporting ATPase                                       |
| maker-11-augustus-gene-123.36-mRNA-1 | NA | NA       |               |              |                          | Short integuments 2 mitochondrial                                      |
| maker-11-augustus-gene-123.41-mRNA-1 | NA | Japonica | Kinase-LRR-TM | Os11g0448000 | OsR498G1120059500.01.T01 | Receptor-like kinase TMK4 isoform A                                    |
| maker-11-augustus-gene-123.43-mRNA-1 | NA | NA       | Kinase-TM     | 0            | OsR498G1120059900.01.T01 | probable serine/threonine-protein kinase PBL28                         |
| maker-11-augustus-gene-130.29-mRNA-1 | NA | NA       |               | Os11g0461000 |                          | Serine carboxypeptidase-like                                           |
| maker-11-augustus-gene-131.0-mRNA-1  | NA | NA       |               | Os11g0460800 |                          | Serine carboxypeptidase                                                |
| maker-11-augustus-gene-133.30-mRNA-1 | NA | Japonica |               | Os11g0465200 | OsR498G1120113400.01.T01 | Indole-2-monooxygenase                                                 |



|                                      |    |          |               |              |                          |                                                                            |
|--------------------------------------|----|----------|---------------|--------------|--------------------------|----------------------------------------------------------------------------|
| maker-11-augustus-gene-138.2-mRNA-1  | NA | Japonica |               | Os11g0474800 | OsR498G0204151800.01.T05 | Ent-isokaurene synthase                                                    |
| maker-11-augustus-gene-14.49-mRNA-1  | NA | NA       |               | Os11g0146300 |                          |                                                                            |
| maker-11-augustus-gene-14.72-mRNA-1  | NA | NA       |               |              |                          | 1-phosphatidylinositol-4-phosphate 5-kinase                                |
| maker-11-augustus-gene-142.36-mRNA-1 | NA | Indica   |               | Os11g0479232 | OsR498G1120143900.01.T01 | GPI transamidase component PIG-T                                           |
| maker-11-augustus-gene-143.25-mRNA-1 | NA | NA       |               | Os11g0481200 | OsR498G1120145600.01.T01 | O-fucosyltransferase family protein (Fragment)                             |
| maker-11-augustus-gene-145.21-mRNA-1 | NA | NA       |               | Os11g0484000 | OsR498G1120151800.01.T02 | Probable bifunctional methylthioribulose-1-phosphate dehydratase/enolase   |
| maker-11-augustus-gene-146.7-mRNA-1  | NA | NA       |               | Os11g0487100 | OsR498G1120156700.01.T02 | Pyridoxal phosphate-dependent transferases superfamily protein             |
| maker-11-augustus-gene-147.32-mRNA-1 | NA | NA       |               | Os11g0485200 | OsR498G1120163700.01.T02 | ATPase 2 plasma membrane-type                                              |
| maker-11-augustus-gene-147.38-mRNA-1 | NA | NA       |               | Os11g0485200 | OsR498G1120160600.01.T05 | ATPase 2 plasma membrane-type                                              |
| maker-11-augustus-gene-147.43-mRNA-1 | NA | NA       |               | 0            | OsR498G0509720900.01.T03 | DNA replication complex GINS protein SLD5                                  |
| maker-11-augustus-gene-148.27-mRNA-1 | NA | NA       | Kinase-LRR-TM | Os11g0490200 |                          | Putative LRR receptor-like serine/threonine-protein kinase                 |
| maker-11-augustus-gene-148.29-mRNA-1 | NA | NA       |               | Os11g0490600 | OsR498G1120166100.01.T01 |                                                                            |
| maker-11-augustus-gene-149.39-mRNA-1 | NA | NA       | CC-NBS-TM     |              |                          | Putative NBS-LRR type disease resistance protein                           |
| maker-11-augustus-gene-15.41-mRNA-1  | NA | NA       |               | Os11g0147800 | OsR498G1119413400.01.T03 | Stem-specific protein TSJT1                                                |
| maker-11-augustus-gene-151.35-mRNA-1 | NA | NA       |               | Os09g0348800 | OsR498G1221562500.01.T03 | Transposon protein, putative, CACTA, En/Spm sub-class, expressed           |
| maker-11-augustus-gene-158.14-mRNA-1 | NA | NA       |               | Os11g0513700 |                          |                                                                            |
| maker-11-augustus-gene-158.8-mRNA-1  | NA | NA       |               |              |                          |                                                                            |
| maker-11-augustus-gene-159.2-mRNA-1  | NA | NA       |               | Os11g0513700 |                          |                                                                            |
| maker-11-augustus-gene-160.0-mRNA-1  | NA | NA       |               | Os11g0516000 | OsR498G1120222300.01.T01 | Serine C-palmitoyltransferase                                              |
| maker-11-augustus-gene-160.10-mRNA-1 | NA | NA       |               | Os11g0515900 | OsR498G1120221800.01.T06 | Pre-mRNA-splicing factor ATP-dependent RNA helicase                        |
| maker-11-augustus-gene-160.13-mRNA-1 | NA | NA       |               | Os11g0516800 |                          |                                                                            |
| maker-11-augustus-gene-160.15-mRNA-1 | NA | Japonica |               | Os11g0517200 | OsR498G1120224000.01.T02 | Retrotransposon protein, putative, unclassified                            |
| maker-11-augustus-gene-160.20-mRNA-1 | NA | NA       |               | Os11g0517400 | OsR498G1120224200.01.T01 |                                                                            |
| maker-11-augustus-gene-160.22-mRNA-1 | NA | NA       |               | 0            | OsR498G1120224200.01.T06 |                                                                            |
| maker-11-augustus-gene-160.25-mRNA-1 | NA | NA       |               | 0            | OsR498G1120224400.01.T05 | Xpo1 domain-containing protein                                             |
| maker-11-augustus-gene-160.4-mRNA-1  | NA | NA       |               |              |                          | Ribosomal protein L31                                                      |
| maker-11-augustus-gene-160.6-mRNA-1  | NA | NA       |               | 0            | OsR498G1120222700.01.T04 |                                                                            |
| maker-11-augustus-gene-161.19-mRNA-1 | NA | NA       |               | Os11g0518600 | OsR498G1120227300.01.T02 |                                                                            |
| maker-11-augustus-gene-161.22-mRNA-1 | NA | NA       |               |              |                          | ACT domain-containing protein ACR1                                         |
| maker-11-augustus-gene-161.32-mRNA-1 | NA | NA       |               | Os02g0583500 |                          |                                                                            |
| maker-11-augustus-gene-161.35-mRNA-1 | NA | NA       |               | Os11g0519100 |                          |                                                                            |
| maker-11-augustus-gene-161.41-mRNA-1 | NA | NA       |               | 0            | OsR498G1120231000.01.T02 |                                                                            |
| maker-11-augustus-gene-162.26-mRNA-1 | NA | NA       |               | Os11g0522000 | OsR498G1120233300.01.T03 | Putative 6-phosphofructo-2-kinase, Fructose-2,6-bisphosphate 2-phosphatase |
| maker-11-augustus-gene-162.28-mRNA-1 | NA | NA       |               | Os11g0519500 |                          |                                                                            |
| maker-11-augustus-gene-162.33-mRNA-1 | NA | Indica   |               | Os11g0521900 | OsR498G1120234600.01.T01 | Protein-serine/threonine phosphatase                                       |
| maker-11-augustus-gene-163.0-mRNA-1  | NA | NA       |               | Os11g0521000 | OsR498G1120235500.01.T01 | Acetylmalan esterase                                                       |
| maker-11-augustus-gene-165.14-mRNA-1 | NA | NA       | CC-NBS-TM     | 0            | OsR498G1120249800.01.T02 | NBS-LRR-like resistance protein (Fragment)                                 |
| maker-11-augustus-gene-169.30-mRNA-1 | NA | Japonica |               | Os11g0532600 | OsR498G1120276200.01.T01 | FBD domain-containing protein                                              |
| maker-11-augustus-gene-173.46-mRNA-1 | NA | NA       |               | 0            | OsR498G1119817100.01.T01 | Transposon protein, putative, CACTA, En/Spm sub-class                      |
| maker-11-augustus-gene-174.0-mRNA-1  | NA | NA       |               | 0            | OsR498G1120154400.01.T01 | Endonuclease                                                               |
| maker-11-augustus-gene-175.42-mRNA-1 | NA | NA       |               | Os11g0544600 | OsR498G1120314100.01.T01 | Putative histone chaperone domain CHZ                                      |
| maker-11-augustus-gene-175.46-mRNA-1 | NA | NA       |               | Os11g0544700 | OsR498G1120314500.01.T03 | CCAAT-HAP5-transcription factor 59                                         |
| maker-11-augustus-gene-175.61-mRNA-1 | NA | NA       |               |              |                          | GDT1-like protein 2, chloroplastic                                         |
| maker-11-augustus-gene-175.66-mRNA-1 | NA | NA       |               | Os11g0544800 | OsR498G1120315000.01.T02 | Glutamyl-tRNA(Gln) amidotransferase subunit B, chloroplastic/mitochondrial |
| maker-11-augustus-gene-176.0-mRNA-1  | NA | NA       |               |              |                          | Ubiquitin carboxyl-terminal hydrolase family protein, expressed            |
| maker-11-augustus-gene-176.2-mRNA-1  | NA | NA       |               | Os11g0546000 | OsR498G1120321500.01.T01 | 68 kDa protein HP68                                                        |
| maker-11-augustus-gene-178.22-mRNA-1 | NA | NA       |               |              |                          |                                                                            |
| maker-11-augustus-gene-179.36-mRNA-1 | NA | NA       |               | Os11g0549685 |                          | Zinc knuckle family protein, expressed                                     |
| maker-11-augustus-gene-179.42-mRNA-1 | NA | NA       |               | 0            | OsR498G1120330600.01.T01 | CDP-diacylglycerol synthase                                                |
| maker-11-augustus-gene-179.45-mRNA-1 | NA | NA       |               | Os11g0549600 | OsR498G1120331000.01.T01 | Maf-like protein isoform B                                                 |
| maker-11-augustus-gene-180.22-mRNA-1 | NA | NA       |               | Os11g0552000 |                          | probable aminotransferase TAT2                                             |
| maker-11-augustus-gene-180.26-mRNA-1 | NA | NA       |               | Os11g0552100 | OsR498G1120337800.01.T01 | DUF724 domain-containing protein 2                                         |
| maker-11-augustus-gene-188.43-mRNA-1 | NA | Japonica | Kinase-LRR-TM | Os11g0569800 | OsR498G1120381200.01.T01 | Putative LRR receptor-like serine/threonine-protein kinase                 |
| maker-11-augustus-gene-192.0-mRNA-1  | NA | Japonica |               | Os11g0575600 | OsR498G0307013100.01.T01 | Lipoxygenase                                                               |
| maker-11-augustus-gene-196.34-mRNA-1 | NA | NA       |               | 0            | OsR498G0613143800.01.T01 | CRIB domain-containing protein                                             |
| maker-11-augustus-gene-197.50-mRNA-1 | NA | NA       |               |              |                          |                                                                            |
| maker-11-augustus-gene-197.58-mRNA-1 | NA | NA       |               | Os11g0587300 | OsR498G1120422600.01.T01 | VARLMGL domain-containing protein (Fragment)                               |
| maker-11-augustus-gene-198.9-mRNA-1  | NA | NA       | CC-LRR-NBS-TM |              |                          | NB-ARC domain containing protein, expressed                                |
| maker-11-augustus-gene-199.30-mRNA-1 | NA | NA       |               | Os11g0589901 |                          | Putative CC-NBS-LRR resistance protein MLA13                               |
| maker-11-augustus-gene-199.40-mRNA-1 | NA | Indica   | CC-LRR-NBS-TM | Os11g0590900 | OsR498G1120430700.01.T02 | Putative CC-NBS-LRR resistance protein MLA13                               |
| maker-11-augustus-gene-199.42-mRNA-1 | NA | NA       |               | Os11g0591000 | OsR498G1120430700.01.T02 | Putative CC-NBS-LRR resistance protein MLA13                               |

|                                      |    |          |               |              |                          |                                                                             |
|--------------------------------------|----|----------|---------------|--------------|--------------------------|-----------------------------------------------------------------------------|
| maker-11-augustus-gene-202.8-mRNA-1  | NA | Japonica |               | Os11g0596400 | OsR498G1120452900.01.T05 | rRNA N-glycosidase                                                          |
| maker-11-augustus-gene-207.8-mRNA-1  | NA | NA       |               | Os11g0602900 | OsR498G1120476500.01.T01 | Peptidyl-prolyl cis-trans isomerase                                         |
| maker-11-augustus-gene-208.5-mRNA-1  | NA | NA       |               |              |                          | Thioredoxin domain-containing protein 9 like                                |
| maker-11-augustus-gene-21.48-mRNA-1  | NA | Indica   |               | Os12g0160400 | OsR498G1119454100.01.T02 | BHLH domain-containing protein                                              |
| maker-11-augustus-gene-21.56-mRNA-1  | NA | NA       |               | Os11g0158600 | OsR498G1119454400.01.T03 | Knotted like homeodomain transcription factor                               |
| maker-11-augustus-gene-21.58-mRNA-1  | NA | NA       |               | 0            | OsR498G1119456800.01.T01 | Phox-associated domain                                                      |
| maker-11-augustus-gene-212.43-mRNA-1 | NA | NA       |               | 0            | OsR498G1120501000.01.T01 |                                                                             |
| maker-11-augustus-gene-220.21-mRNA-1 | NA | NA       |               | Os07g0651500 |                          | ATP-dependent DNA helicase                                                  |
| maker-11-augustus-gene-221.0-mRNA-1  | NA | Japonica | Kinase-LRR-TM | Os11g0628000 | OsR498G1120550600.01.T01 | Putative LRR receptor-like serine/threonine-protein kinase                  |
| maker-11-augustus-gene-226.0-mRNA-1  | NA | NA       |               | Os09g0244000 |                          |                                                                             |
| maker-11-augustus-gene-229.0-mRNA-1  | NA | NA       |               | 0            | OsR498G1120616900.01.T01 | F-box/LRR-repeat protein 4                                                  |
| maker-11-augustus-gene-229.5-mRNA-1  | NA | NA       |               | Os11g0641500 | OsR498G1120617700.01.T01 | Laccase                                                                     |
| maker-11-augustus-gene-229.7-mRNA-1  | NA | NA       |               | Os11g0641800 | OsR498G1120619100.01.T01 | Laccase                                                                     |
| maker-11-augustus-gene-230.46-mRNA-1 | NA | NA       |               | Os11g0642800 | OsR498G1120623700.01.T08 | Glutathione synthetase                                                      |
| maker-11-augustus-gene-230.52-mRNA-1 | NA | NA       |               | 0            | OsR498G1120626700.01.T01 | Nuclear pore complex protein NUP107                                         |
| maker-11-augustus-gene-230.58-mRNA-1 | NA | Indica   | Kinase-TM     | Os06g0693200 | OsR498G1120627100.01.T01 | Protein kinase domain containing protein, expressed                         |
| maker-11-augustus-gene-230.60-mRNA-1 | NA | NA       |               | 0            | OsR498G1120627000.01.T02 | Sugar transporter family protein, expressed                                 |
| maker-11-augustus-gene-231.9-mRNA-1  | NA | NA       |               | Os07g0267400 |                          | Hydroxyproline-rich glycoprotein-like protein                               |
| maker-11-augustus-gene-232.0-mRNA-1  | NA | NA       | CC-NBS-TM     | Os11g0646300 |                          | Leucine Rich Repeat family protein, expressed                               |
| maker-11-augustus-gene-233.24-mRNA-1 | NA | NA       |               | 0            | OsR498G1120642100.01.T01 |                                                                             |
| maker-11-augustus-gene-234.0-mRNA-1  | NA | NA       |               | 0            | OsR498G1120643700.01.T01 |                                                                             |
| maker-11-augustus-gene-239.0-mRNA-1  | NA | NA       |               | Os11g0658700 | OsR498G1120679700.01.T02 | Agamous-like MADS-box protein AGL65                                         |
| maker-11-augustus-gene-241.10-mRNA-1 | NA | Indica   |               | Os07g0672500 | OsR498G1120687800.01.T02 | AAA-type ATPase family protein                                              |
| maker-11-augustus-gene-241.18-mRNA-1 | NA | NA       |               | Os11g0661800 |                          |                                                                             |
| maker-11-augustus-gene-241.20-mRNA-1 | NA | NA       |               | Os08g0522100 |                          | ATP-dependent DNA helicase                                                  |
| maker-11-augustus-gene-241.6-mRNA-1  | NA | NA       |               | Os11g0661300 | OsR498G1120687500.01.T01 | ADP,ATP carrier protein like                                                |
| maker-11-augustus-gene-243.0-mRNA-1  | NA | NA       | CC-Kinase-TM  | Os11g0664000 | OsR498G1120691000.01.T01 | Serine/threonine protein kinase (Fragment)                                  |
| maker-11-augustus-gene-243.1-mRNA-1  | NA | Indica   | CC-Kinase-TM  | Os11g0664000 | OsR498G1120691200.01.T01 | Putative receptor-like protein kinase FERONIA (Fragment)                    |
| maker-11-augustus-gene-243.4-mRNA-1  | NA | Japonica |               | Os11g0664800 | OsR498G1120688900.01.T01 | Calmodulin-binding protein 60 F                                             |
| maker-11-augustus-gene-244.51-mRNA-1 | NA | NA       |               | Os11g0667400 |                          | USP domain-containing protein                                               |
| maker-11-augustus-gene-245.39-mRNA-1 | NA | NA       |               |              |                          | Calmodulin-binding protein-like                                             |
| maker-11-augustus-gene-247.0-mRNA-1  | NA | NA       | CC-Kinase-TM  |              |                          | S-receptor kinase-like protein 1-like                                       |
| maker-11-augustus-gene-247.10-mRNA-1 | NA | NA       |               | Os11g0673100 | OsR498G1120707400.01.T01 | DUF4149 domain-containing protein (Fragment)                                |
| maker-11-augustus-gene-247.3-mRNA-1  | NA | NA       |               | Os11g0672300 | OsR498G1120704100.01.T05 | Protein MID1-COMPLEMENTING ACTIVITY 1                                       |
| maker-11-augustus-gene-247.5-mRNA-1  | NA | NA       |               | 0            | OsR498G1120704400.01.T01 | p-loop nucleoside triphosphate hydrolase superfamily protein with CH (Calp) |
| maker-11-augustus-gene-247.8-mRNA-1  | NA | NA       |               | Os11g0672700 | OsR498G1120706200.01.T01 | ATP-dependent DNA helicase                                                  |
| maker-11-augustus-gene-248.32-mRNA-1 | NA | Japonica | LRR-NBS       | Os11g0673900 | OsR498G1120709100.01.T03 | Putative nucleotide-binding leucine-rich-repeat protein 1                   |
| maker-11-augustus-gene-249.0-mRNA-1  | NA | NA       |               | Os11g0677500 | OsR498G1120716200.01.T01 | POPLD domain-containing protein (Fragment)                                  |
| maker-11-augustus-gene-249.2-mRNA-1  | NA | NA       |               | 0            | OsR498G1120717200.01.T03 | POPLD domain-containing protein (Fragment)                                  |
| maker-11-augustus-gene-25.37-mRNA-1  | NA | NA       |               | Os11g0166300 |                          | 60 kDa jasmonate-induced protein, putative                                  |
| maker-11-augustus-gene-25.39-mRNA-1  | NA | Indica   |               | Os12g0165700 | OsR498G1119474600.01.T04 | Putative mediator of RNA polymerase II transcription subunit 26c            |
| maker-11-augustus-gene-25.43-mRNA-1  | NA | Japonica |               | Os11g0161033 | OsR498G0611509300.01.T02 | Ozone-responsive stress related protein                                     |
| maker-11-augustus-gene-25.45-mRNA-1  | NA | NA       |               | 0            | OsR498G0100693500.01.T01 | Transposon protein, putative, Mutator sub-class                             |
| maker-11-augustus-gene-250.32-mRNA-1 | NA | Indica   | CC-Kinase-TM  | Os12g0562500 | OsR498G1120719100.01.T01 | Serine/threonine-protein kinase CTR1                                        |
| maker-11-augustus-gene-252.38-mRNA-1 | NA | NA       |               | Os11g0682300 | OsR498G1120728700.01.T06 | U2 snRNP auxiliary factor large subunit                                     |
| maker-11-augustus-gene-252.47-mRNA-1 | NA | NA       |               | Os11g0682000 |                          | Embryogenesis transmembrane protein-like                                    |
| maker-11-augustus-gene-252.57-mRNA-1 | NA | Japonica | NBS           | Os11g0684600 | OsR498G1120731800.01.T01 | NBS-LRR disease resistance protein homologue-like                           |
| maker-11-augustus-gene-253.1-mRNA-1  | NA | Indica   | NBS-TM        | Os11g0684100 | OsR498G1120735400.01.T01 | NBS-LRR disease resistance protein homologue-like                           |
| maker-11-augustus-gene-254.4-mRNA-1  | NA | NA       |               | Os11g0687100 | OsR498G1120737300.01.T01 | von Willebrand factor type A domain-like                                    |
| maker-11-augustus-gene-256.34-mRNA-1 | NA | NA       | Kinase-TM     | Os11g0695850 | OsR498G1120743300.01.T02 | Wall-associated receptor kinase                                             |
| maker-11-augustus-gene-256.36-mRNA-1 | NA | NA       | Kinase        |              |                          | Major disease resistance protein Xa4                                        |
| maker-11-augustus-gene-256.48-mRNA-1 | NA | NA       | Kinase-TM     | Os11g0691240 | OsR498G1120759300.01.T01 | Wall associated kinase-like                                                 |
| maker-11-augustus-gene-259.46-mRNA-1 | NA | NA       |               | Os11g0695900 | OsR498G1120756600.01.T02 | ARM repeat superfamily protein                                              |
| maker-11-augustus-gene-259.52-mRNA-1 | NA | NA       |               | Os10g0186800 | OsR498G1221417300.01.T01 |                                                                             |
| maker-11-augustus-gene-26.4-mRNA-1   | NA | NA       |               | 0            | OsR498G1119549900.01.T02 |                                                                             |
| maker-11-augustus-gene-26.6-mRNA-1   | NA | NA       |               | Os09g0443400 | OsR498G0612110800.01.T01 | Glycine-rich RNA-binding protein-like                                       |
| maker-11-augustus-gene-260.0-mRNA-1  | NA | Japonica | CC-NBS-TM     | Os11g0699100 | OsR498G1120757300.01.T01 | Disease resistance protein RPP13                                            |
| maker-11-augustus-gene-261.58-mRNA-1 | NA | NA       |               | Os11g0702700 |                          | DDE Tnp4 domain-containing protein (Fragment)                               |
| maker-11-augustus-gene-261.60-mRNA-1 | NA | NA       |               | 0            | OsR498G1120765700.01.T01 | DDE Tnp4 domain-containing protein                                          |
| maker-11-augustus-gene-261.63-mRNA-1 | NA | Indica   |               | Os11g0703500 | OsR498G1120766700.01.T01 |                                                                             |
| maker-11-augustus-gene-261.65-mRNA-1 | NA | NA       |               | Os11g0703400 | OsR498G1120766200.01.T01 | Charged multivesicular body protein 2a                                      |

|                                      |    |          |               |              |                          |                                                                     |
|--------------------------------------|----|----------|---------------|--------------|--------------------------|---------------------------------------------------------------------|
| maker-11-augustus-gene-262.42-mRNA-1 | NA | NA       |               | Os11g0704000 | OsR498G1120768100.01.T01 | Selenoprotein H                                                     |
| maker-11-augustus-gene-262.44-mRNA-1 | NA | NA       |               | Os11g0704300 | OsR498G1120769100.01.T01 | Probable GTP-binding protein OBGm, mitochondrial                    |
| maker-11-augustus-gene-262.46-mRNA-1 | NA | NA       |               | Os11g0704500 | OsR498G1120769500.01.T01 | Metallothionein-like protein 1, putative, expressed                 |
| maker-11-augustus-gene-262.50-mRNA-1 | NA | NA       |               | Os11g0704600 |                          | Glucan endo-1,3-beta-D-glucosidase                                  |
| maker-11-augustus-gene-262.53-mRNA-1 | NA | NA       |               | Os11g0704700 | OsR498G1120770400.01.T02 | RRM domain-containing protein (Fragment)                            |
| maker-11-augustus-gene-263.11-mRNA-1 | NA | NA       |               | Os12g0518200 | OsR498G0407561500.01.T01 |                                                                     |
| maker-11-augustus-gene-263.14-mRNA-1 | NA | NA       |               | 0            | OsR498G0100584200.01.T01 |                                                                     |
| maker-11-augustus-gene-263.46-mRNA-1 | NA | NA       |               | Os11g0587300 | OsR498G1120422600.01.T01 | VARLMGL domain-containing protein (Fragment)                        |
| maker-11-augustus-gene-263.9-mRNA-1  | NA | Japonica |               | Os11g0708900 | OsR498G0407560600.01.T01 | Phenylalanine ammonia-lyase                                         |
| maker-11-augustus-gene-27.16-mRNA-1  | NA | Indica   |               | Os11g0166800 | OsR498G1119474600.01.T02 | probable mediator of RNA polymerase II transcription subunit 26c    |
| maker-11-augustus-gene-3.2-mRNA-1    | NA | NA       |               | 0            | OsR498G1119344700.01.T01 |                                                                     |
| maker-11-augustus-gene-30.28-mRNA-1  | NA | Japonica | Kinase-LRR-TM | Os11g0172133 | OsR498G1119496900.01.T01 | Protein kinase domain containing protein, expressed                 |
| maker-11-augustus-gene-31.47-mRNA-1  | NA | NA       |               | 0            | OsR498G0815094500.01.T02 | Calcineurin B-like protein 1                                        |
| maker-11-augustus-gene-31.50-mRNA-1  | NA | NA       |               | Os08g0395500 | OsR498G0815094500.01.T01 | Bidirectional sugar transporter SWEET                               |
| maker-11-augustus-gene-32.0-mRNA-1   | NA | Indica   |               | Os11g0175500 | OsR498G1119504300.01.T02 | E3 ubiquitin-protein ligase CHFR                                    |
| maker-11-augustus-gene-32.12-mRNA-1  | NA | NA       |               |              |                          |                                                                     |
| maker-11-augustus-gene-32.16-mRNA-1  | NA | Indica   |               | Os02g0793100 | OsR498G1119506400.01.T02 | Protein TPLATE like                                                 |
| maker-11-augustus-gene-32.5-mRNA-1   | NA | NA       |               | Os11g0176000 | OsR498G1119506700.01.T01 | Dystrophin myotonia WD repeat-containing protein-like               |
| maker-11-augustus-gene-32.7-mRNA-1   | NA | NA       |               | Os11g0175000 | OsR498G1119502200.01.T01 | Beta-fructofuranosidase                                             |
| maker-11-augustus-gene-32.9-mRNA-1   | NA | NA       |               | Os11g0175400 | OsR498G1119503600.01.T03 | Beta-fructofuranosidase                                             |
| maker-11-augustus-gene-33.0-mRNA-1   | NA | NA       |               | Os11g0176100 | OsR498G1119507100.01.T01 | Cleavage stimulating factor like                                    |
| maker-11-augustus-gene-33.14-mRNA-1  | NA | NA       |               | Os11g0176200 | OsR498G1119507600.01.T02 | DEXH-box ATP-dependent RNA helicase DEXH10                          |
| maker-11-augustus-gene-33.6-mRNA-1   | NA | Indica   |               | Os11g0176300 | OsR498G1119507700.01.T03 | O-fucosyltransferase family protein (Fragment)                      |
| maker-11-augustus-gene-36.54-mRNA-1  | NA | Japonica |               | Os11g0182500 | OsR498G1119526200.01.T01 | SWI/SNF complex subunit SWI3C-like                                  |
| maker-11-augustus-gene-38.28-mRNA-1  | NA | NA       |               | Os11g0186200 | OsR498G1119534500.01.T01 | Aldehyde dehydrogenase                                              |
| maker-11-augustus-gene-38.32-mRNA-1  | NA | NA       |               | Os11g0186300 | OsR498G1119534700.01.T01 | Methyltransferase                                                   |
| maker-11-augustus-gene-38.38-mRNA-1  | NA | NA       |               | Os11g0186400 | OsR498G1119535000.01.T01 | DNA polymerase delta catalytic subunit                              |
| maker-11-augustus-gene-39.43-mRNA-1  | NA | NA       |               | Os11g0187500 | OsR498G1119538700.01.T01 | Heat shock 70 kDa protein 3                                         |
| maker-11-augustus-gene-39.45-mRNA-1  | NA | NA       |               | Os11g0186900 | OsR498G1119536600.01.T01 | 1-aminocyclopropane-1-carboxylate oxidase                           |
| maker-11-augustus-gene-39.48-mRNA-1  | NA | NA       |               | Os11g0187000 |                          | WD repeat-containing protein 44                                     |
| maker-11-augustus-gene-39.49-mRNA-1  | NA | NA       |               | 0            | OsR498G0101916300.01.T01 | BED-type domain-containing protein                                  |
| maker-11-augustus-gene-39.51-mRNA-1  | NA | Indica   |               | Os11g0187600 | OsR498G1119540600.01.T01 | Heat shock 70 kDa protein 3                                         |
| maker-11-augustus-gene-39.53-mRNA-1  | NA | NA       |               | Os11g0187500 | OsR498G1119541000.01.T01 | Heat shock 70 kDa protein 3                                         |
| maker-11-augustus-gene-40.1-mRNA-1   | NA | NA       |               |              |                          | Terpene cyclase/mutase family member                                |
| maker-11-augustus-gene-44.31-mRNA-1  | NA | NA       |               | Os10g0199200 |                          | Transposon protein, putative, CACTA, En/Spm sub-class, expressed    |
| maker-11-augustus-gene-5.40-mRNA-1   | NA | NA       |               | Os11g0126100 | OsR498G1119360200.01.T01 | Protein DETOXIFICATION                                              |
| maker-11-augustus-gene-5.59-mRNA-1   | NA | NA       |               | Os02g0530900 | OsR498G0203991600.01.T01 |                                                                     |
| maker-11-augustus-gene-52.50-mRNA-1  | NA | NA       |               | 0            | OsR498G1221160700.01.T01 | Transposon protein, putative, CACTA, En/Spm sub-class               |
| maker-11-augustus-gene-53.0-mRNA-1   | NA | NA       |               |              |                          |                                                                     |
| maker-11-augustus-gene-55.2-mRNA-1   | NA | NA       |               |              |                          | Transposable element protein, putative, MuDR                        |
| maker-11-augustus-gene-56.31-mRNA-1  | NA | Japonica |               | Os11g0259700 | OsR498G1119728500.01.T01 | SAM dependent carboxyl methyltransferase                            |
| maker-11-augustus-gene-56.33-mRNA-1  | NA | Japonica |               | Os11g0260100 | OsR498G1119728500.01.T01 | Salicylic acid methyl transferase                                   |
| maker-11-augustus-gene-56.43-mRNA-1  | NA | NA       |               |              |                          | Transposable element protein, putative                              |
| maker-11-augustus-gene-57.0-mRNA-1   | NA | NA       |               | Os07g0651500 |                          | AT hook motif-containing protein, putative                          |
| maker-11-augustus-gene-58.29-mRNA-1  | NA | Indica   | Kinase-LRR-TM | Os12g0210400 | OsR498G1119698900.01.T01 | probable leucine-rich repeat receptor-like protein kinase At5g49770 |
| maker-11-augustus-gene-6.17-mRNA-1   | NA | NA       |               | Os12g0124400 | OsR498G1119355200.01.T01 |                                                                     |
| maker-11-augustus-gene-60.6-mRNA-1   | NA | NA       |               |              |                          | TTF-type domain-containing protein (Fragment)                       |
| maker-11-augustus-gene-61.54-mRNA-1  | NA | Japonica |               | Os11g0251200 | OsR498G1119717400.01.T03 | Protein ACCELERATED CELL DEATH 6-like isoform X2                    |
| maker-11-augustus-gene-63.10-mRNA-1  | NA | NA       |               | 0            | OsR498G0102056900.01.T01 | Transposon protein, putative, CACTA, En/Spm sub-class, expressed    |
| maker-11-augustus-gene-64.0-mRNA-1   | NA | NA       |               | 0            | OsR498G1119563100.01.T01 |                                                                     |
| maker-11-augustus-gene-64.9-mRNA-1   | NA | NA       |               | Os11g0197600 | OsR498G1119561000.01.T01 | B3 domain-containing protein                                        |
| maker-11-augustus-gene-65.33-mRNA-1  | NA | NA       |               | Os11g0199200 | OsR498G1119567600.01.T02 | Protein disulfide-isomerase                                         |
| maker-11-augustus-gene-65.44-mRNA-1  | NA | NA       |               | 0            | OsR498G1119569800.01.T01 | Serine/threonine-protein kinase WNK4-like                           |
| maker-11-augustus-gene-66.39-mRNA-1  | NA | NA       |               | Os11g0200600 | OsR498G1119570700.01.T03 | F-box domain containing protein, expressed                          |
| maker-11-augustus-gene-66.42-mRNA-1  | NA | NA       |               | 0            | OsR498G1119573100.01.T02 | F-box domain containing protein, expressed                          |
| maker-11-augustus-gene-67.43-mRNA-1  | NA | NA       |               | Os06g0272601 | OsR498G0204300200.01.T01 | dNK domain-containing protein                                       |
| maker-11-augustus-gene-67.48-mRNA-1  | NA | NA       |               |              |                          | F-box domain, putative                                              |
| maker-11-augustus-gene-67.59-mRNA-1  | NA | NA       |               |              |                          | Glutamic acid-rich protein, putative (Fragment)                     |
| maker-11-augustus-gene-69.35-mRNA-1  | NA | NA       |               | Os11g0205500 | OsR498G1119581200.01.T01 |                                                                     |
| maker-11-augustus-gene-69.44-mRNA-1  | NA | Indica   |               | Os11g0208400 | OsR498G1119575200.01.T01 | F-box domain, putative                                              |
| maker-11-augustus-gene-69.50-mRNA-1  | NA | NA       |               | Os11g0206700 | OsR498G1119585800.01.T01 | Extra-large guanine nucleotide-binding protein like                 |

|                                      |    |          |               |              |                          |                                                                        |
|--------------------------------------|----|----------|---------------|--------------|--------------------------|------------------------------------------------------------------------|
| maker-11-augustus-gene-71.0-mRNA-1   | NA | NA       |               | Os11g0208000 | OsR498G1119594500.01.T03 | F-box domain containing protein, expressed                             |
| maker-11-augustus-gene-71.5-mRNA-1   | NA | NA       |               | 0            | OsR498G1119596600.01.T02 | F-box family-2                                                         |
| maker-11-augustus-gene-73.0-mRNA-1   | NA | Indica   |               | Os06g0614300 | OsR498G1119608300.01.T06 | TBCC domain-containing protein 1                                       |
| maker-11-augustus-gene-74.2-mRNA-1   | NA | NA       | LRR-TM        | 0            | OsR498G1119610600.01.T03 | NBS-LRR disease resistance protein family-4                            |
| maker-11-augustus-gene-75.0-mRNA-1   | NA | NA       |               |              |                          |                                                                        |
| maker-11-augustus-gene-75.2-mRNA-1   | NA | NA       | Kinase-TM     | 0            | OsR498G1119613600.01.T01 | Coatomer beta subunit, putative                                        |
| maker-11-augustus-gene-8.55-mRNA-1   | NA | NA       |               | Os11g0132700 | OsR498G1119370400.01.T05 | Aladin                                                                 |
| maker-11-augustus-gene-80.36-mRNA-1  | NA | NA       | CC-NBS-TM     | Os11g0222900 |                          | Putative NB-ARC domain-containing protein (Fragment)                   |
| maker-11-augustus-gene-81.0-mRNA-1   | NA | Indica   |               | Os07g0179600 | OsR498G1119638500.01.T01 | Neprosin domain-containing protein (Fragment)                          |
| maker-11-augustus-gene-82.2-mRNA-1   | NA | NA       | Kinase        |              |                          | Retrotransposon protein, putative, LINE subclass                       |
| maker-11-augustus-gene-83.3-mRNA-1   | NA | Japonica | CC-LRR-NBS-TM | Os11g0227100 | OsR498G1119648000.01.T02 | NBS-LRR type resistance protein (Fragment)                             |
| maker-11-augustus-gene-84.0-mRNA-1   | NA | Indica   |               | Os11g0230400 | OsR498G1119652500.01.T01 | SERPIN domain-containing protein (Fragment)                            |
| maker-11-augustus-gene-84.1-mRNA-1   | NA | Indica   |               | Os11g0230700 | OsR498G1119652700.01.T01 | SERPIN domain-containing protein (Fragment)                            |
| maker-11-augustus-gene-84.4-mRNA-1   | NA | Indica   |               | Os11g0230700 | OsR498G1119653900.01.T01 | SERPIN domain-containing protein (Fragment)                            |
| maker-11-augustus-gene-84.6-mRNA-1   | NA | NA       |               | Os11g0231600 | OsR498G1119654700.01.T01 | F-box domain containing protein, expressed                             |
| maker-11-augustus-gene-84.8-mRNA-1   | NA | NA       | Kinase-LRR-TM | Os11g0232100 | OsR498G1119656400.01.T01 | Receptor-like protein kinase HSL1                                      |
| maker-11-augustus-gene-85.26-mRNA-1  | NA | NA       |               | 0            | OsR498G1119655900.01.T01 | Serpin (Serine protease inhibitor)                                     |
| maker-11-augustus-gene-85.28-mRNA-1  | NA | NA       | Kinase-LRR-TM | 0            | OsR498G1119660500.01.T01 | Leucine-rich repeat receptor-like serine/threonine-protein kinase BAM3 |
| maker-11-augustus-gene-86.0-mRNA-1   | NA | NA       |               | Os07g0597400 | OsR498G1019078500.01.T01 |                                                                        |
| maker-11-augustus-gene-86.10-mRNA-1  | NA | Indica   |               | Os04g0631200 | OsR498G1119664600.01.T01 | Xyloglucan endotransglucosylase/hydrolase                              |
| maker-11-augustus-gene-86.3-mRNA-1   | NA | NA       |               | Os11g0234200 | OsR498G1119661800.01.T01 | PHD domain-containing protein (Fragment)                               |
| maker-11-augustus-gene-87.38-mRNA-1  | NA | Indica   |               | Os05g0318300 | OsR498G1119671000.01.T02 | RNase III domain-containing protein (Fragment)                         |
| maker-11-augustus-gene-88.8-mRNA-1   | NA | NA       |               |              |                          | Transposon protein, putative, Mutator sub-class, expressed             |
| maker-11-augustus-gene-9.6-mRNA-1    | NA | Indica   |               | Os12g0131900 | OsR498G1119376200.01.T01 | Rhamnogalacturonan endolyase                                           |
| maker-11-augustus-gene-97.14-mRNA-1  | NA | NA       |               | Os03g0795500 | OsR498G0307198700.01.T04 | PITH domain-containing protein (Fragment)                              |
| maker-11-augustus-gene-99.0-mRNA-1   | NA | NA       |               | 0            | OsR498G0917954800.01.T01 | Transposon protein, putative, CACTA, En/Spm sub-class                  |
| maker-12-augustus-gene-0.24-mRNA-1   | NA | NA       |               | 0            | OsR498G1220780000.01.T03 | Hydroxyproline-rich glycoprotein family protein                        |
| maker-12-augustus-gene-0.26-mRNA-1   | NA | NA       |               | 0            | OsR498G1119271000.01.T01 | X8 domain-containing protein (Fragment)                                |
| maker-12-augustus-gene-0.34-mRNA-1   | NA | NA       |               |              |                          | Pleiotropic drug resistance protein 3                                  |
| maker-12-augustus-gene-1.12-mRNA-1   | NA | NA       |               | 0            | OsR498G1119277500.01.T02 |                                                                        |
| maker-12-augustus-gene-1.14-mRNA-1   | NA | NA       |               | 0            | OsR498G1119277500.01.T04 | Mitochondrial trans-2-enoyl-CoA reductase                              |
| maker-12-augustus-gene-1.18-mRNA-1   | NA | NA       |               | Os11g0102600 | OsR498G1119277700.01.T01 | LisH dimerization motif                                                |
| maker-12-augustus-gene-1.30-mRNA-1   | NA | NA       |               | Os12g0102300 | OsR498G1119278000.01.T03 | Transcription factor WRKY2                                             |
| maker-12-augustus-gene-1.34-mRNA-1   | NA | NA       | Kinase-LRR-TM | 0            | OsR498G1220789200.01.T06 | Leucine-rich repeat protein kinase family protein                      |
| maker-12-augustus-gene-1.5-mRNA-1    | NA | NA       | Kinase-TM     |              |                          | Nonphototropic hypocotyl 1                                             |
| maker-12-augustus-gene-10.68-mRNA-1  | NA | NA       |               |              |                          | Ethanolamine-phosphate cytidylyltransferase                            |
| maker-12-augustus-gene-101.39-mRNA-1 | NA | NA       |               | Os12g0271700 | OsR498G1221270800.01.T01 | Solanesyl-diphosphate synthase 2, chloroplastic                        |
| maker-12-augustus-gene-105.31-mRNA-1 | NA | NA       |               | Os12g0277400 | OsR498G1221297000.01.T01 | RING-type E3 ubiquitin transferase                                     |
| maker-12-augustus-gene-11.29-mRNA-1  | NA | NA       |               | 0            | OsR498G1220858100.01.T01 | NAC domain transcription factor                                        |
| maker-12-augustus-gene-11.36-mRNA-1  | NA | Japonica |               | Os12g0123100 | OsR498G1119349400.01.T02 | Pentatricopeptide repeat-containing protein, chloroplastic             |
| maker-12-augustus-gene-11.4-mRNA-1   | NA | NA       |               | 0            | OsR498G1220855500.01.T03 | Tau class glutathione S-transferase                                    |
| maker-12-augustus-gene-11.7-mRNA-1   | NA | NA       |               | Os12g0123500 | OsR498G1220856100.01.T01 | GDA1/CD39 family protein, expressed                                    |
| maker-12-augustus-gene-11.8-mRNA-1   | NA | Indica   |               | Os12g0123600 | OsR498G1119351300.01.T01 | GDA1/CD39 family protein, expressed                                    |
| maker-12-augustus-gene-110.41-mRNA-1 | NA | Japonica |               | Os12g0284000 | OsR498G1221322100.01.T01 | Ultraviolet-B receptor UVR8                                            |
| maker-12-augustus-gene-112.42-mRNA-1 | NA | NA       |               | Os12g0288000 | OsR498G1221337600.01.T03 |                                                                        |
| maker-12-augustus-gene-113.42-mRNA-1 | NA | NA       |               | 0            | OsR498G1221342900.01.T03 | AAA+ ATPase domain                                                     |
| maker-12-augustus-gene-114.0-mRNA-1  | NA | Indica   | Kinase        | Os05g0511400 | OsR498G1221346100.01.T01 | Serine/threonine-protein kinase CBK1                                   |
| maker-12-augustus-gene-114.10-mRNA-1 | NA | NA       |               | Os12g0291100 | OsR498G1221348500.01.T01 | Ribulose biphosphate carboxylase small chain                           |
| maker-12-augustus-gene-114.12-mRNA-1 | NA | NA       |               | 0            | OsR498G1221346400.01.T07 | Quinolinate synthase, chloroplastic                                    |
| maker-12-augustus-gene-114.22-mRNA-1 | NA | NA       |               |              |                          | SGF29 C-terminal domain-containing protein                             |
| maker-12-augustus-gene-118.0-mRNA-1  | NA | NA       |               | 0            | OsR498G0714235700.01.T01 | HGWP repeat containing protein-like                                    |
| maker-12-augustus-gene-119.19-mRNA-1 | NA | NA       |               | Os01g0233400 | OsR498G0100488100.01.T04 | Chromatin modification-related protein Eaf                             |
| maker-12-augustus-gene-12.0-mRNA-1   | NA | NA       |               | Os12g0123800 | OsR498G1220859100.01.T01 | Cup-shaped cotyledon                                                   |
| maker-12-augustus-gene-12.12-mRNA-1  | NA | NA       | LRR-TM        |              |                          | NB-ARC domain-containing protein                                       |
| maker-12-augustus-gene-12.14-mRNA-1  | NA | NA       |               | Os12g0125000 | OsR498G1220863800.01.T01 | Myb-like DNA-binding domain containing protein, expressed              |
| maker-12-augustus-gene-12.16-mRNA-1  | NA | NA       |               | Os12g0125300 | OsR498G1220865000.01.T01 | BUB1 N-terminal domain-containing protein (Fragment)                   |
| maker-12-augustus-gene-12.17-mRNA-1  | NA | NA       |               | Os12g0125300 | OsR498G1220865000.01.T01 | BUB1 N-terminal domain-containing protein (Fragment)                   |
| maker-12-augustus-gene-12.2-mRNA-1   | NA | Indica   |               | Os12g0124000 | OsR498G1220859700.01.T02 | FHA domain containing protein, expressed                               |
| maker-12-augustus-gene-12.20-mRNA-1  | NA | NA       |               | Os12g0125400 | OsR498G1220865200.01.T01 | Homoserine dehydrogenase                                               |
| maker-12-augustus-gene-12.27-mRNA-1  | NA | NA       |               | Os11g0126100 | OsR498G1119359600.01.T01 | Protein DETOXIFICATION                                                 |
| maker-12-augustus-gene-12.6-mRNA-1   | NA | NA       |               | Os12g0123900 | OsR498G1220859400.01.T03 |                                                                        |

|                                      |    |          |           |              |                          |                                                                             |
|--------------------------------------|----|----------|-----------|--------------|--------------------------|-----------------------------------------------------------------------------|
| maker-12-augustus-gene-120.28-mRNA-1 | NA | NA       |           | Os01g0233400 | OsR498G0100488100.01.T04 | Chromatin modification-related protein Eaf                                  |
| maker-12-augustus-gene-120.32-mRNA-1 | NA | NA       |           | Os01g0233500 | OsR498G0100487800.01.T02 | Cyclin N-terminal domain-containing protein (Fragment)                      |
| maker-12-augustus-gene-120.37-mRNA-1 | NA | NA       |           | Os01g0233500 | OsR498G0100487800.01.T02 | Cyclin N-terminal domain-containing protein (Fragment)                      |
| maker-12-augustus-gene-123.0-mRNA-1  | NA | NA       |           | Os08g0158900 | OsR498G0815236600.01.T02 | Nucleolar GTP-binding protein 1                                             |
| maker-12-augustus-gene-123.3-mRNA-1  | NA | NA       |           | Os08g0158600 | OsR498G0815236300.01.T01 |                                                                             |
| maker-12-augustus-gene-125.29-mRNA-1 | NA | NA       |           | Os12g0405200 | OsR498G1221366900.01.T02 | 15-cis-zeta-carotene isomerase                                              |
| maker-12-augustus-gene-126.2-mRNA-1  | NA | NA       |           |              |                          | Phosphatidylinositol 3,4,5-trisphosphate 3-phosphatase and protein-tyrosin  |
| maker-12-augustus-gene-127.42-mRNA-1 | NA | NA       |           | Os12g0409700 | OsR498G1221377600.01.T01 | ABC transporter domain-containing protein (Fragment)                        |
| maker-12-augustus-gene-129.27-mRNA-1 | NA | NA       |           | Os12g0411700 | OsR498G1221382800.01.T01 | ABC transporter domain-containing protein                                   |
| maker-12-augustus-gene-13.37-mRNA-1  | NA | NA       |           | Os12g0126200 | OsR498G1220868300.01.T03 | ELMO domain-containing protein A                                            |
| maker-12-augustus-gene-13.44-mRNA-1  | NA | NA       |           | Os12g0127100 | OsR498G1220869900.01.T02 | RING-type E3 ubiquitin transferase                                          |
| maker-12-augustus-gene-13.49-mRNA-1  | NA | NA       |           | Os12g0127500 | OsR498G1220870900.01.T01 |                                                                             |
| maker-12-augustus-gene-13.51-mRNA-1  | NA | NA       |           | Os11g0126100 | OsR498G1119360200.01.T01 | MatE family protein, expressed                                              |
| maker-12-augustus-gene-13.58-mRNA-1  | NA | NA       |           | Os05g0269800 |                          | Transposon protein, putative, CACTA, En/Spm sub-class                       |
| maker-12-augustus-gene-13.64-mRNA-1  | NA | NA       |           | Os12g0126000 | OsR498G1220867600.01.T01 | Protein DETOXIFICATION                                                      |
| maker-12-augustus-gene-13.70-mRNA-1  | NA | NA       |           | 0            | OsR498G1220868200.01.T01 | GDSL-like Lipase/Acylhydrolase family protein, expressed                    |
| maker-12-augustus-gene-13.73-mRNA-1  | NA | Japonica |           | Os12g0126300 | OsR498G1220868600.01.T01 | Ethylene-responsive transcription factor WRI1                               |
| maker-12-augustus-gene-13.76-mRNA-1  | NA | NA       |           | Os12g0126800 | OsR498G1220869400.01.T02 | CID domain-containing protein                                               |
| maker-12-augustus-gene-13.82-mRNA-1  | NA | Indica   |           | Os11g0130200 | OsR498G1220869600.01.T01 | CID domain-containing protein                                               |
| maker-12-augustus-gene-13.84-mRNA-1  | NA | NA       |           | Os12g0127400 | OsR498G1220870800.01.T03 | FBD domain-containing protein                                               |
| maker-12-augustus-gene-13.88-mRNA-1  | NA | NA       |           | Os12g0127600 | OsR498G1220871400.01.T02 | Ulp1 protease family C-terminal catalytic domain containing protein express |
| maker-12-augustus-gene-132.38-mRNA-1 | NA | NA       |           | Os12g0414900 |                          | Tyrosyl-DNA phosphodiesterase                                               |
| maker-12-augustus-gene-135.7-mRNA-1  | NA | NA       |           | 0            | OsR498G1221413100.01.T02 | Tyrosine-protein phosphatase DSP1                                           |
| maker-12-augustus-gene-140.0-mRNA-1  | NA | Japonica |           | Os12g0428000 | OsR498G1221432700.01.T01 | Rhodanese domain-containing protein (Fragment)                              |
| maker-12-augustus-gene-140.21-mRNA-1 | NA | NA       |           | Os12g0428700 | OsR498G1221433900.01.T01 |                                                                             |
| maker-12-augustus-gene-140.4-mRNA-1  | NA | NA       |           |              |                          | Autophagy-related protein 101                                               |
| maker-12-augustus-gene-141.27-mRNA-1 | NA | NA       |           | Os12g0430500 | OsR498G1221435100.01.T01 | DC-STAMP domain-containing protein 2 (Fragment)                             |
| maker-12-augustus-gene-141.31-mRNA-1 | NA | NA       |           | Os12g0429200 | OsR498G1221434400.01.T01 | Beta-galactosidase 15                                                       |
| maker-12-augustus-gene-141.34-mRNA-1 | NA | NA       |           | Os12g0429200 | OsR498G1221434400.01.T01 | Beta-galactosidase 9                                                        |
| maker-12-augustus-gene-142.37-mRNA-1 | NA | NA       |           | Os12g0431700 | OsR498G1221441100.01.T01 | VWFA domain-containing protein                                              |
| maker-12-augustus-gene-142.39-mRNA-1 | NA | NA       |           | Os09g0258900 |                          | Far-red impaired response-like                                              |
| maker-12-augustus-gene-142.41-mRNA-1 | NA | NA       |           |              |                          | Protein transport protein Sec24-like protein isoform X2                     |
| maker-12-augustus-gene-142.47-mRNA-1 | NA | NA       |           | 0            | OsR498G0407881700.01.T01 | Transposon protein, putative, Mutator sub-class, expressed                  |
| maker-12-augustus-gene-142.51-mRNA-1 | NA | NA       |           | Os12g0431300 | OsR498G1221440200.01.T01 | Protein kinase domain-containing protein                                    |
| maker-12-augustus-gene-143.24-mRNA-1 | NA | NA       |           | Os09g0258800 | OsR498G0102499100.01.T01 |                                                                             |
| maker-12-augustus-gene-143.28-mRNA-1 | NA | NA       |           | 0            | OsR498G0407890700.01.T01 |                                                                             |
| maker-12-augustus-gene-144.28-mRNA-1 | NA | NA       |           |              |                          | Transposon protein, putative, CACTA, En/Spm sub-class                       |
| maker-12-augustus-gene-144.29-mRNA-1 | NA | NA       |           | Os09g0443400 | OsR498G0612110800.01.T01 | Glycine-rich RNA-binding protein-like                                       |
| maker-12-augustus-gene-147.0-mRNA-1  | NA | Japonica |           | Os12g0433700 | OsR498G0305782200.01.T01 | Negatively light-regulated protein, putative, expressed                     |
| maker-12-augustus-gene-147.6-mRNA-1  | NA | NA       | Kinase-TM | Os12g0433500 | OsR498G1221451200.01.T03 | serine/threonine-protein kinase TIO                                         |
| maker-12-augustus-gene-148.23-mRNA-1 | NA | NA       |           | Os12g0434400 | OsR498G1221453900.01.T01 | Putative aminopeptidase of the M17 family                                   |
| maker-12-augustus-gene-161.32-mRNA-1 | NA | NA       |           |              |                          | Retrotransposon protein, putative, unclassified                             |
| maker-12-augustus-gene-168.0-mRNA-1  | NA | Japonica |           | Os12g0456700 | OsR498G0816414100.01.T04 | Glycerophosphodiester phosphodiesterase                                     |
| maker-12-augustus-gene-17.36-mRNA-1  | NA | Indica   |           | Os12g0134000 | OsR498G1220895100.01.T03 | Pyruvate carboxyltransferase domain-containing protein (Fragment)           |
| maker-12-augustus-gene-17.42-mRNA-1  | NA | NA       |           | Os12g0134200 | OsR498G1220895400.01.T01 | ARM repeat superfamily protein                                              |
| maker-12-augustus-gene-17.48-mRNA-1  | NA | NA       |           | Os12g0133900 | OsR498G1220894600.01.T03 | U3 small nucleolar ribonucleoprotein protein MPP10                          |
| maker-12-augustus-gene-17.69-mRNA-1  | NA | NA       |           | Os12g0133900 | OsR498G1220894600.01.T01 | U3 small nucleolar ribonucleoprotein protein MPP10                          |
| maker-12-augustus-gene-17.73-mRNA-1  | NA | NA       |           | Os12g0134200 | OsR498G1220895400.01.T01 | 1-phosphatidylinositol-4-phosphate 5-kinase                                 |
| maker-12-augustus-gene-17.76-mRNA-1  | NA | NA       |           | Os12g0134000 | OsR498G1220895100.01.T03 | hydroxymethylglutaryl-CoA lyase, mitochondrial-like isoform X2              |
| maker-12-augustus-gene-175.32-mRNA-1 | NA | NA       | CC-NBS-TM | Os12g0467300 |                          | NB-ARC domain containing protein, expressed                                 |
| maker-12-augustus-gene-176.30-mRNA-1 | NA | NA       | NBS-TM    |              |                          | Putative NB-ARC domain-containing protein (Fragment)                        |
| maker-12-augustus-gene-176.31-mRNA-1 | NA | NA       |           | Os12g0468600 | OsR498G1221572900.01.T01 | 5-methylthioadenosine/S-adenosylhomocysteine deaminase-like isoform X1      |
| maker-12-augustus-gene-18.35-mRNA-1  | NA | Indica   |           | Os12g0124000 | OsR498G1220859700.01.T02 | FHA domain containing protein, expressed                                    |
| maker-12-augustus-gene-18.42-mRNA-1  | NA | NA       |           | Os12g0134000 | OsR498G1220895100.01.T03 | Hydroxymethylglutaryl-CoA lyase mitochondrial                               |
| maker-12-augustus-gene-18.48-mRNA-1  | NA | NA       | LRR-TM    |              |                          | NB-ARC domain-containing protein                                            |
| maker-12-augustus-gene-18.50-mRNA-1  | NA | NA       |           | 0            | OsR498G1220995600.01.T01 | PHD-type domain-containing protein                                          |
| maker-12-augustus-gene-18.53-mRNA-1  | NA | NA       |           | 0            | OsR498G1220995600.01.T01 | PHD-type domain-containing protein                                          |
| maker-12-augustus-gene-18.56-mRNA-1  | NA | NA       |           | Os12g0133900 | OsR498G1220894600.01.T03 | U3 small nucleolar ribonucleoprotein protein MPP10                          |
| maker-12-augustus-gene-19.52-mRNA-1  | NA | NA       |           | Os08g0343300 | OsR498G1119384700.01.T01 | Transcription initiation factor IIE subunit alpha                           |
| maker-12-augustus-gene-19.62-mRNA-1  | NA | Indica   |           | Os11g0137300 | OsR498G1220895400.01.T01 | proteasome-associated protein ECM29 homolog                                 |
| maker-12-augustus-gene-197.0-mRNA-1  | NA | NA       | NBS-TM    | 0            | OsR498G1221658300.01.T01 | NB-ARC domain containing protein, expressed                                 |

|                                      |    |          |           |              |                          |                                                                            |
|--------------------------------------|----|----------|-----------|--------------|--------------------------|----------------------------------------------------------------------------|
| maker-12-augustus-gene-198.16-mRNA-1 | NA | NA       |           | Os12g0499200 |                          | Protein kinase domain-containing protein                                   |
| maker-12-augustus-gene-2.46-mRNA-1   | NA | Japonica |           | Os12g0102900 | OsR498G1119279500.01.T02 | Putative E3 ubiquitin-protein ligase rbrA                                  |
| maker-12-augustus-gene-2.57-mRNA-1   | NA | Indica   |           | Os12g0104200 | OsR498G1220792700.01.T01 |                                                                            |
| maker-12-augustus-gene-2.66-mRNA-1   | NA | NA       |           | Os12g0104300 | OsR498G1220794300.01.T01 | Double CLP-N motif-containing P-loop nucleoside triphosphate hydrolases s  |
| maker-12-augustus-gene-2.69-mRNA-1   | NA | Japonica |           | Os12g0102700 | OsR498G1220790000.01.T01 | EF-hand domain-containing protein                                          |
| maker-12-augustus-gene-2.78-mRNA-1   | NA | NA       |           | Os11g0103700 | OsR498G1119280200.01.T01 | S-adenosylmethionine mitochondrial carrier                                 |
| maker-12-augustus-gene-2.83-mRNA-1   | NA | NA       |           | 0            | OsR498G1119281400.01.T03 |                                                                            |
| maker-12-augustus-gene-206.34-mRNA-1 | NA | Indica   | CC-NBS-TM | Os12g0511400 | OsR498G1221704000.01.T02 | NB-ARC domain containing protein, expressed                                |
| maker-12-augustus-gene-211.44-mRNA-1 | NA | NA       |           |              |                          | PHD finger family protein isoform 1                                        |
| maker-12-augustus-gene-216.39-mRNA-1 | NA | Indica   |           | Os12g0533400 | OsR498G1221756300.01.T01 | Rho GTPase-activating protein gacA                                         |
| maker-12-augustus-gene-216.41-mRNA-1 | NA | NA       |           | Os12g0533700 | OsR498G1221757300.01.T01 | Phenylalanyl-tRNA synthetase                                               |
| maker-12-augustus-gene-216.46-mRNA-1 | NA | NA       |           | 0            | OsR498G1221756600.01.T02 | Fibronectin type-III domain-containing protein (Fragment)                  |
| maker-12-augustus-gene-216.50-mRNA-1 | NA | NA       |           | Os12g0533600 | OsR498G1221757200.01.T02 | DNA-directed RNA polymerases                                               |
| maker-12-augustus-gene-216.53-mRNA-1 | NA | NA       |           | Os12g0533800 | OsR498G1221757600.01.T04 | Mitochondrial carrier protein, expressed                                   |
| maker-12-augustus-gene-216.57-mRNA-1 | NA | Indica   |           | Os01g0375200 | OsR498G1221758000.01.T05 | Shikimate biosynthesis protein aroDE                                       |
| maker-12-augustus-gene-216.63-mRNA-1 | NA | NA       |           | Os12g0534100 | OsR498G1221758800.01.T01 | Auxin response factor                                                      |
| maker-12-augustus-gene-216.65-mRNA-1 | NA | NA       |           | Os12g0534200 | OsR498G1221759000.01.T01 | Acyl carrier protein 1, chloroplastic                                      |
| maker-12-augustus-gene-217.38-mRNA-1 | NA | Indica   |           | Os12g0536200 | OsR498G1221765500.01.T02 | Sgf11 (Transcriptional regulation protein) protein                         |
| maker-12-augustus-gene-217.44-mRNA-1 | NA | NA       |           | Os11g0500100 |                          | HAT dimerization domain-containing protein / transposase-related           |
| maker-12-augustus-gene-217.47-mRNA-1 | NA | Japonica |           | Os12g0535400 | OsR498G0305726100.01.T03 | AB hydrolase-1 domain-containing protein                                   |
| maker-12-augustus-gene-217.50-mRNA-1 | NA | Japonica |           | Os12g0535600 | OsR498G1221764600.01.T01 | rRNA N-glycosidase                                                         |
| maker-12-augustus-gene-218.43-mRNA-1 | NA | NA       |           | Os10g0549900 |                          | HAT dimerisation domain-containing protein-like                            |
| maker-12-augustus-gene-218.45-mRNA-1 | NA | NA       |           | 0            | OsR498G1120483500.01.T01 | L10-interacting MYB domain-containing protein-like                         |
| maker-12-augustus-gene-218.47-mRNA-1 | NA | NA       |           | Os10g0549900 |                          | HAT dimerisation domain-containing protein-like                            |
| maker-12-augustus-gene-218.48-mRNA-1 | NA | NA       |           | Os11g0500100 |                          | HAT dimerization domain-containing protein / transposase-related           |
| maker-12-augustus-gene-218.55-mRNA-1 | NA | NA       |           | Os12g0538300 | OsR498G1221772300.01.T02 | Component of oligomeric Golgi complex 8                                    |
| maker-12-augustus-gene-218.61-mRNA-1 | NA | NA       |           | Os12g0538500 | OsR498G1221773300.01.T01 | E3 ubiquitin-protein ligase MIEL1                                          |
| maker-12-augustus-gene-218.66-mRNA-1 | NA | NA       |           | Os12g0538100 | OsR498G1221771400.01.T01 | rRNA-processing protein FYV7                                               |
| maker-12-augustus-gene-219.31-mRNA-1 | NA | NA       |           |              |                          | Acyl-CoA-binding domain-containing protein 4                               |
| maker-12-augustus-gene-219.41-mRNA-1 | NA | Indica   |           | Os01g0630700 | OsR498G1221780100.01.T02 | AT hook motif-containing protein, putative                                 |
| maker-12-augustus-gene-219.46-mRNA-1 | NA | NA       |           | Os03g0855700 | OsR498G0102324800.01.T02 | DUF223 domain-containing protein                                           |
| maker-12-augustus-gene-219.47-mRNA-1 | NA | Indica   |           | Os03g0855700 | OsR498G1221780300.01.T02 | DUF223 domain-containing protein                                           |
| maker-12-augustus-gene-219.54-mRNA-1 | NA | NA       |           | Os12g0538900 | OsR498G1221775200.01.T01 | Golgin candidate like                                                      |
| maker-12-augustus-gene-219.59-mRNA-1 | NA | Indica   |           | Os12g0539800 | OsR498G1221780600.01.T01 |                                                                            |
| maker-12-augustus-gene-22.34-mRNA-1  | NA | NA       |           | 0            | OsR498G1119556100.01.T01 | Transposon mutator sub-class                                               |
| maker-12-augustus-gene-220.27-mRNA-1 | NA | NA       |           | Os12g0540800 | OsR498G1221784900.01.T04 | Acyl-CoA-binding domain-containing protein 4-like isoform X2               |
| maker-12-augustus-gene-220.31-mRNA-1 | NA | NA       |           | 0            | OsR498G1221787500.01.T03 | Respiratory burst oxidase isogeny protein B                                |
| maker-12-augustus-gene-220.36-mRNA-1 | NA | NA       |           | Os12g0541400 | OsR498G1221787700.01.T01 | Uveal autoantigen with coiled-coil domains and ankyrin repeats isoform 4   |
| maker-12-augustus-gene-220.43-mRNA-1 | NA | NA       |           | Os12g0540900 | OsR498G1221785200.01.T01 | Tryptophanyl-tRNA synthetase                                               |
| maker-12-augustus-gene-221.0-mRNA-1  | NA | NA       |           | 0            | OsR498G0407881700.01.T01 | Transposon protein, putative, Mutator sub-class, expressed                 |
| maker-12-augustus-gene-222.0-mRNA-1  | NA | NA       |           | 0            | OsR498G1221803000.01.T03 |                                                                            |
| maker-12-augustus-gene-223.27-mRNA-1 | NA | NA       |           | Os12g0543600 | OsR498G1221807500.01.T01 | DAO domain-containing protein                                              |
| maker-12-augustus-gene-223.29-mRNA-1 | NA | NA       |           |              |                          | NAM-associated domain-containing protein                                   |
| maker-12-augustus-gene-224.33-mRNA-1 | NA | NA       |           | 0            | OsR498G1221821300.01.T01 | FBD domain-containing protein (Fragment)                                   |
| maker-12-augustus-gene-225.0-mRNA-1  | NA | NA       |           | Os12g0546800 | OsR498G1221833900.01.T01 | Expansin                                                                   |
| maker-12-augustus-gene-225.2-mRNA-1  | NA | NA       |           |              |                          | p-loop nucleoside triphosphate hydrolase superfamily protein with CH (Calp |
| maker-12-augustus-gene-225.7-mRNA-1  | NA | NA       |           | 0            | OsR498G1221837800.01.T01 | Calmodulin-binding protein 60 C                                            |
| maker-12-augustus-gene-226.0-mRNA-1  | NA | NA       |           | Os12g0548300 | OsR498G1221839300.01.T01 | Nucleoside diphosphate kinase                                              |
| maker-12-augustus-gene-226.10-mRNA-1 | NA | Indica   |           | Os12g0551200 | OsR498G1221848400.01.T01 | Patatin                                                                    |
| maker-12-augustus-gene-226.4-mRNA-1  | NA | NA       |           | Os12g0548200 | OsR498G1221839000.01.T01 | Auxilin-related protein 1                                                  |
| maker-12-augustus-gene-226.8-mRNA-1  | NA | NA       |           |              |                          |                                                                            |
| maker-12-augustus-gene-227.29-mRNA-1 | NA | Indica   |           | Os03g0393900 | OsR498G1221850700.01.T01 | Patatin                                                                    |
| maker-12-augustus-gene-227.31-mRNA-1 | NA | Indica   |           | Os07g0267400 | OsR498G1221850900.01.T02 | Hydroxyproline-rich glycoprotein-like protein                              |
| maker-12-augustus-gene-227.32-mRNA-1 | NA | NA       |           | Os12g0551900 | OsR498G1221850900.01.T02 | Hydroxyproline-rich glycoprotein-like protein                              |
| maker-12-augustus-gene-227.43-mRNA-1 | NA | NA       |           |              |                          | Pentatricopeptide repeat-containing protein (Fragment)                     |
| maker-12-augustus-gene-227.45-mRNA-1 | NA | Japonica |           | Os12g0552400 | OsR498G1221852400.01.T03 | Fiber protein Fb19                                                         |
| maker-12-augustus-gene-227.47-mRNA-1 | NA | NA       |           | Os12g0552500 | OsR498G1221852400.01.T03 | Fiber protein Fb19                                                         |
| maker-12-augustus-gene-228.29-mRNA-1 | NA | Indica   |           | Os12g0552700 | OsR498G1221853700.01.T01 | F-box/LRR-repeat protein 3-like isoform X2                                 |
| maker-12-augustus-gene-228.32-mRNA-1 | NA | Japonica |           | Os12g0552800 | OsR498G1221854300.01.T01 | Glycoside hydrolase family 114 protein (Fragment)                          |
| maker-12-augustus-gene-228.39-mRNA-1 | NA | NA       |           | Os12g0554800 | OsR498G1221861300.01.T01 | Polygalacturonase                                                          |
| maker-12-augustus-gene-228.43-mRNA-1 | NA | NA       |           | Os12g0555000 | OsR498G1221861500.01.T01 |                                                                            |

|                                      |    |          |               |              |                          |                                                               |
|--------------------------------------|----|----------|---------------|--------------|--------------------------|---------------------------------------------------------------|
| maker-12-augustus-gene-228.45-mRNA-1 | NA | NA       |               | Os12g0555100 | OsR498G1221862100.01.T01 | Major allergen Api g 1, isoallergen 1-like                    |
| maker-12-augustus-gene-228.48-mRNA-1 | NA | NA       | CC-LRR-NBS-TM | Os12g0516300 | OsR498G1221855600.01.T01 | NB-ARC domain containing protein, expressed                   |
| maker-12-augustus-gene-228.50-mRNA-1 | NA | NA       |               | Os12g0516800 | OsR498G1221857800.01.T03 | Trichome birefringence-like 16                                |
| maker-12-augustus-gene-228.55-mRNA-1 | NA | NA       |               | Os12g0554400 | OsR498G1221858600.01.T01 | Trafficking protein particle complex II-specific subunit like |
| maker-12-augustus-gene-228.61-mRNA-1 | NA | Japonica |               | Os12g0554500 | OsR498G1221858800.01.T02 | Mono-/di-acylglycerol lipase N-terminal                       |
| maker-12-augustus-gene-229.0-mRNA-1  | NA | NA       |               | Os12g0555200 | OsR498G1221862700.01.T01 | Major allergen Api g 1, isoallergen 1-like                    |
| maker-12-augustus-gene-229.2-mRNA-1  | NA | Indica   |               | Os12g0555300 | OsR498G1221863100.01.T01 |                                                               |
| maker-12-augustus-gene-230.5-mRNA-1  | NA | Japonica |               | Os12g0558400 | OsR498G1221868900.01.T02 | FBD domain-containing protein (Fragment)                      |
| maker-12-augustus-gene-232.31-mRNA-1 | NA | Indica   |               | Os12g0559200 | OsR498G1221876500.01.T01 | Lipoxygenase                                                  |
| maker-12-augustus-gene-233.14-mRNA-1 | NA | Japonica |               | Os12g0562700 | OsR498G1221885500.01.T01 | Multidrug resistance-associated protein3                      |
| maker-12-augustus-gene-233.19-mRNA-1 | NA | NA       |               | Os12g0562900 | OsR498G1221885700.01.T01 | Prefoldin subunit 3                                           |
| maker-12-augustus-gene-233.5-mRNA-1  | NA | NA       |               | 0            | OsR498G1221883500.01.T01 | Phosphoinositide phospholipase C                              |
| maker-12-augustus-gene-233.9-mRNA-1  | NA | NA       | CC-Kinase     | Os12g0562500 | OsR498G1221884500.01.T01 | Putative serine/threonine-protein kinase roco5                |
| maker-12-augustus-gene-234.55-mRNA-1 | NA | NA       |               |              |                          | GDSL esterase/lipase                                          |
| maker-12-augustus-gene-234.57-mRNA-1 | NA | NA       |               | Os12g0563400 | OsR498G1221887900.01.T04 | Rhodanese-like domain-containing protein 6                    |
| maker-12-augustus-gene-234.62-mRNA-1 | NA | NA       |               | Os12g0563500 | OsR498G1221888100.01.T01 | Metallopeptidase family M24 containing protein, expressed     |
| maker-12-augustus-gene-234.70-mRNA-1 | NA | NA       |               | Os12g0564400 | OsR498G1221891300.01.T01 | Photosystem II PsbP, oxygen evolving complex                  |
| maker-12-augustus-gene-234.77-mRNA-1 | NA | NA       |               | 0            | OsR498G1221887400.01.T01 | Mitochondrial ribosomal protein MRP17                         |
| maker-12-augustus-gene-234.83-mRNA-1 | NA | NA       |               | 0            | OsR498G1221890200.01.T01 | Transcription factor MYB21                                    |
| maker-12-augustus-gene-234.86-mRNA-1 | NA | NA       |               | Os12g0564600 | OsR498G1221891600.01.T01 | Nuclear export mediator factor Nemf like                      |
| maker-12-augustus-gene-234.92-mRNA-1 | NA | NA       | NBS-TM        | Os12g0564800 | OsR498G1221892000.01.T02 | NB-ARC domain containing protein expressed                    |
| maker-12-augustus-gene-236.86-mRNA-1 | NA | Indica   |               | Os12g0571000 | OsR498G1221901600.01.T01 | Zinc knuckle family protein, expressed                        |
| maker-12-augustus-gene-236.88-mRNA-1 | NA | NA       |               | Os12g0571100 | OsR498G1221902200.01.T01 | Metallothionein-like protein 1, putative, expressed           |
| maker-12-augustus-gene-239.34-mRNA-1 | NA | Japonica |               | Os12g0573700 | OsR498G1221920100.01.T01 |                                                               |
| maker-12-augustus-gene-239.36-mRNA-1 | NA | Japonica |               | Os12g0573800 | OsR498G1221920100.01.T01 |                                                               |
| maker-12-augustus-gene-241.35-mRNA-1 | NA | NA       |               |              |                          | RRM domain-containing protein                                 |
| maker-12-augustus-gene-241.38-mRNA-1 | NA | NA       |               | Os12g0577100 | OsR498G1221929100.01.T03 | Putative RNA-binding protein 46 isoform X2                    |
| maker-12-augustus-gene-241.51-mRNA-1 | NA | NA       |               | Os12g0577600 | OsR498G1221932100.01.T04 | Protein ENHANCED DISEASE RESISTANCE like                      |
| maker-12-augustus-gene-241.71-mRNA-1 | NA | NA       |               | Os12g0576900 | OsR498G1221928800.01.T01 | Diacylglycerol kinase                                         |
| maker-12-augustus-gene-241.74-mRNA-1 | NA | Indica   | Kinase-TM     | Os02g0559300 | OsR498G1221932600.01.T02 | Protein kinase domain containing protein, expressed           |
| maker-12-augustus-gene-242.34-mRNA-1 | NA | NA       |               | Os12g0578200 | OsR498G1221935500.01.T01 | Chorismate mutase                                             |
| maker-12-augustus-gene-242.36-mRNA-1 | NA | NA       |               | Os12g0578300 | OsR498G1221935700.01.T01 | Muscle M-line assembly protein unc-89-like                    |
| maker-12-augustus-gene-242.38-mRNA-1 | NA | NA       |               | Os12g0578400 | OsR498G1221936100.01.T01 | heparanase-like protein 2 isoform X2                          |
| maker-12-augustus-gene-242.43-mRNA-1 | NA | NA       |               | Os12g0579000 | OsR498G1221937900.01.T01 | RNA polymerase-associated protein LEO1                        |
| maker-12-augustus-gene-242.52-mRNA-1 | NA | NA       |               | 0            | OsR498G1221938700.01.T01 | BED zinc finger family protein                                |
| maker-12-augustus-gene-242.53-mRNA-1 | NA | NA       |               | Os12g0577800 | OsR498G1221932800.01.T01 | Signal recognition particle SEC65 subunit (Fragment)          |
| maker-12-augustus-gene-242.55-mRNA-1 | NA | NA       |               | Os12g0578500 | OsR498G1221936400.01.T01 | Hexosyltransferase                                            |
| maker-12-augustus-gene-242.58-mRNA-1 | NA | NA       |               | Os12g0578800 |                          | Zinc finger C2H2 type family protein expressed                |
| maker-12-augustus-gene-243.0-mRNA-1  | NA | NA       |               | Os12g0580300 | OsR498G1221943900.01.T04 | TATA-box-binding protein isoform B                            |
| maker-12-augustus-gene-244.29-mRNA-1 | NA | NA       |               | Os12g0581700 | OsR498G1221950700.01.T01 | MAR-binding filament-like protein 1 isoform 1                 |
| maker-12-augustus-gene-244.32-mRNA-1 | NA | NA       |               | Os12g0581800 | OsR498G1221951100.01.T01 | Cyclin N-terminal domain-containing protein (Fragment)        |
| maker-12-augustus-gene-244.37-mRNA-1 | NA | Indica   |               | Os11g0432900 | OsR498G1221949000.01.T02 | Serine carboxypeptidase-like 5                                |
| maker-12-augustus-gene-244.40-mRNA-1 | NA | NA       |               | Os12g0581600 | OsR498G1221949800.01.T01 | Metal transporter Nramp6                                      |
| maker-12-augustus-gene-244.42-mRNA-1 | NA | NA       |               | Os12g0581900 | OsR498G1221951400.01.T01 | Zinc finger protein 7                                         |
| maker-12-augustus-gene-244.43-mRNA-1 | NA | Japonica |               | Os12g0582000 | OsR498G1221952800.01.T01 | Cytochrome P450 family protein, expressed                     |
| maker-12-augustus-gene-244.46-mRNA-1 | NA | NA       |               | Os12g0582600 |                          | TFIIIS N-terminal domain-containing protein (Fragment)        |
| maker-12-augustus-gene-244.48-mRNA-1 | NA | NA       |               | Os12g0582700 | OsR498G1221956000.01.T01 | Isoflavone 2'-hydroxylase                                     |
| maker-12-augustus-gene-245.26-mRNA-1 | NA | NA       |               | Os12g0582800 | OsR498G1221956500.01.T01 | Early-responsive to dehydration protein, putative, expressed  |
| maker-12-augustus-gene-245.32-mRNA-1 | NA | NA       |               | Os12g0583400 | OsR498G1221958100.01.T02 | Low-density lipoprotein receptor-related 2                    |
| maker-12-augustus-gene-245.37-mRNA-1 | NA | NA       |               | Os12g0583900 | OsR498G1221960500.01.T11 | Nucleobase-ascorbate transporter like                         |
| maker-12-augustus-gene-245.42-mRNA-1 | NA | NA       |               | Os12g0583000 | OsR498G1221957400.01.T01 |                                                               |
| maker-12-augustus-gene-245.47-mRNA-1 | NA | NA       |               | Os12g0583500 | OsR498G1221958400.01.T02 | BTB/POZ domain-containing protein NPY4-like                   |
| maker-12-augustus-gene-247.0-mRNA-1  | NA | Indica   | CC-LRR-NBS-TM | Os12g0586000 | OsR498G1221987100.01.T02 | RPW8 domain-containing protein                                |
| maker-12-augustus-gene-247.13-mRNA-1 | NA | NA       | Kinase-TM     | Os12g0586100 | OsR498G1221987400.01.T01 | Serine/threonine-protein kinase SAPK10                        |
| maker-12-augustus-gene-25.13-mRNA-1  | NA | NA       |               | 0            | OsR498G1220940200.01.T01 | Retrotransposon protein, putative, unclassified, expressed    |
| maker-12-augustus-gene-251.37-mRNA-1 | NA | Indica   |               | Os12g0593000 | OsR498G1222022200.01.T02 | Guanine nucleotide-binding protein alpha-2 subunit            |
| maker-12-augustus-gene-252.0-mRNA-1  | NA | NA       |               |              |                          | SHR-BD domain-containing protein                              |
| maker-12-augustus-gene-252.15-mRNA-1 | NA | NA       |               | Os12g0594700 |                          | F-box domain containing protein, expressed                    |
| maker-12-augustus-gene-252.9-mRNA-1  | NA | NA       | Kinase-TM     | Os12g0594300 | OsR498G1222027100.01.T01 | Serine/threonine-protein kinase CTR1                          |
| maker-12-augustus-gene-253.29-mRNA-1 | NA | NA       |               | Os12g0595500 | OsR498G1222031600.01.T01 |                                                               |
| maker-12-augustus-gene-253.31-mRNA-1 | NA | Indica   |               | Os12g0595600 | OsR498G1222031800.01.T01 | Skp1 domain-containing protein                                |

|                                      |    |          |               |              |                          |                                                                            |
|--------------------------------------|----|----------|---------------|--------------|--------------------------|----------------------------------------------------------------------------|
| maker-12-augustus-gene-253.6-mRNA-1  | NA | NA       |               | Os12g0596800 | OsR498G1222034100.01.T01 | LIM and UIM domain-containing                                              |
| maker-12-augustus-gene-254.37-mRNA-1 | NA | NA       |               |              |                          | BHLH domain-containing protein                                             |
| maker-12-augustus-gene-254.39-mRNA-1 | NA | NA       |               | Os05g0269800 | OsR498G0409509300.01.T01 | DDE Tnp4 domain-containing protein                                         |
| maker-12-augustus-gene-255.48-mRNA-1 | NA | NA       |               | Os12g0599900 | OsR498G1222046700.01.T05 | Serine/threonine-protein phosphatase 6 regulatory ankyrin repeat subunit B |
| maker-12-augustus-gene-255.52-mRNA-1 | NA | NA       |               | Os12g0599900 | OsR498G1222046700.01.T05 | Ankyrin repeat, PH and SEC7 domain containing protein secG                 |
| maker-12-augustus-gene-255.54-mRNA-1 | NA | NA       |               | 0            | OsR498G1222048100.01.T02 | Pyridoxal kinase                                                           |
| maker-12-augustus-gene-255.60-mRNA-1 | NA | Indica   |               | Os12g0600200 | OsR498G1222047000.01.T01 | E3 ubiquitin protein ligase DRIP2                                          |
| maker-12-augustus-gene-256.11-mRNA-1 | NA | NA       |               | 0            | OsR498G1222052100.01.T01 | Basic leucine zipper 25                                                    |
| maker-12-augustus-gene-256.18-mRNA-1 | NA | NA       |               | Os12g0601300 | OsR498G1222050600.01.T01 | Auxin-responsive protein IAA30                                             |
| maker-12-augustus-gene-256.9-mRNA-1  | NA | NA       |               | Os12g0601400 | OsR498G1222051500.01.T01 | Auxin-responsive protein IAA31                                             |
| maker-12-augustus-gene-257.24-mRNA-1 | NA | Indica   |               | Os12g0603300 | OsR498G1222057600.01.T01 | AP2 domain containing protein, expressed                                   |
| maker-12-augustus-gene-258.0-mRNA-1  | NA | Japonica |               | Os12g0604500 | OsR498G1222064900.01.T01 | IQ calmodulin-binding motif family protein, expressed                      |
| maker-12-augustus-gene-258.13-mRNA-1 | NA | Indica   |               | Os03g0635800 | OsR498G1222064000.01.T01 | Expressed protein (With alternative splicing)                              |
| maker-12-augustus-gene-258.16-mRNA-1 | NA | NA       | Kinase        | Os12g0604700 | OsR498G1222065800.01.T02 | Serine/threonine-protein kinase Nek2                                       |
| maker-12-augustus-gene-258.21-mRNA-1 | NA | NA       |               | Os12g0604800 | OsR498G1222066600.01.T01 | Heat shock protein STI                                                     |
| maker-12-augustus-gene-258.24-mRNA-1 | NA | NA       |               | 0            | OsR498G1222067000.01.T02 | NAB domain-containing protein                                              |
| maker-12-augustus-gene-258.26-mRNA-1 | NA | NA       |               | Os12g0605300 | OsR498G1222068600.01.T01 | CRC domain-containing protein (Fragment)                                   |
| maker-12-augustus-gene-258.29-mRNA-1 | NA | NA       |               | Os12g0605400 | OsR498G1222069000.01.T01 | UBC core domain-containing protein (Fragment)                              |
| maker-12-augustus-gene-258.32-mRNA-1 | NA | NA       |               | Os12g0605500 | OsR498G1222069200.01.T03 | CRC domain-containing protein TSO1                                         |
| maker-12-augustus-gene-258.7-mRNA-1  | NA | NA       |               | Os12g0605800 | OsR498G1222069300.01.T01 | Methylcrotonoyl-CoA carboxylase subunit alpha                              |
| maker-12-augustus-gene-259.14-mRNA-1 | NA | NA       |               | Os12g0606600 | OsR498G1222072300.01.T02 | HORMA domain containing protein, expressed                                 |
| maker-12-augustus-gene-259.19-mRNA-1 | NA | NA       |               | 0            | OsR498G1222073100.01.T03 | Sentrin/sumo-specific protease                                             |
| maker-12-augustus-gene-259.2-mRNA-1  | NA | NA       | Kinase-TM     | Os12g0606000 |                          | Lectin protein kinase, putative, expressed                                 |
| maker-12-augustus-gene-259.20-mRNA-1 | NA | NA       |               | Os12g0607000 | OsR498G1222073500.01.T01 | Hcy-binding domain-containing protein                                      |
| maker-12-augustus-gene-259.21-mRNA-1 | NA | NA       |               | Os12g0607100 | OsR498G1222073700.01.T01 | Protein-synthesizing GTPase                                                |
| maker-12-augustus-gene-259.5-mRNA-1  | NA | NA       |               | Os02g0523300 | OsR498G0203961600.01.T02 | Gamma-tubulin complex component                                            |
| maker-12-augustus-gene-259.58-mRNA-1 | NA | Indica   |               | Os05g0497700 | OsR498G1222074600.01.T04 |                                                                            |
| maker-12-augustus-gene-260.56-mRNA-1 | NA | Indica   | Kinase-TM     | Os12g0608500 | OsR498G1222073900.01.T01 | Protein kinase-like resistance protein (Fragment)                          |
| maker-12-augustus-gene-266.0-mRNA-1  | NA | NA       |               | 0            | OsR498G1222118700.01.T01 | Molecular chaperone DnaK                                                   |
| maker-12-augustus-gene-266.13-mRNA-1 | NA | NA       |               | Os12g0618300 | OsR498G1222119800.01.T01 | CP-type G domain-containing protein (Fragment)                             |
| maker-12-augustus-gene-266.17-mRNA-1 | NA | NA       |               | Os12g0618400 | OsR498G1222120200.01.T01 | CP-type G domain-containing protein                                        |
| maker-12-augustus-gene-266.2-mRNA-1  | NA | NA       |               | Os12g0617800 | OsR498G1222118000.01.T02 | K efflux antiporter                                                        |
| maker-12-augustus-gene-266.8-mRNA-1  | NA | NA       |               | Os12g0617900 | OsR498G1222118200.01.T01 | Serine/threonine-protein phosphatase                                       |
| maker-12-augustus-gene-267.0-mRNA-1  | NA | NA       | Kinase-LRR-TM | 0            | OsR498G1222125700.01.T01 | EF-TU receptor                                                             |
| maker-12-augustus-gene-267.10-mRNA-1 | NA | NA       |               | 0            | OsR498G1222126600.01.T03 | MBD domain-containing protein (Fragment)                                   |
| maker-12-augustus-gene-267.12-mRNA-1 | NA | NA       |               | Os12g0620600 | OsR498G1222127200.01.T02 | C2 NT-type domain-containing protein                                       |
| maker-12-augustus-gene-267.2-mRNA-1  | NA | NA       |               | Os12g0618600 | OsR498G1222120400.01.T02 | CCAAT-binding transcription factor B                                       |
| maker-12-augustus-gene-267.7-mRNA-1  | NA | NA       |               | Os12g0619000 | OsR498G1222122200.01.T01 | IQ calmodulin-binding motif family protein, expressed                      |
| maker-12-augustus-gene-27.41-mRNA-1  | NA | NA       |               | Os12g0152100 | OsR498G1220951300.01.T01 | Putative dihydrolipoylysine-residue acetyltransferase                      |
| maker-12-augustus-gene-273.54-mRNA-1 | NA | NA       |               | 0            | OsR498G1222155600.01.T01 | UDP-glucose-fructose-phosphate glucosyltransferase                         |
| maker-12-augustus-gene-274.2-mRNA-1  | NA | NA       |               | Os12g0632700 | OsR498G1222160800.01.T01 | Malate dehydrogenase                                                       |
| maker-12-augustus-gene-274.9-mRNA-1  | NA | NA       |               | Os01g0946800 |                          | Ulp1 protease family, C-terminal catalytic domain containing protein       |
| maker-12-augustus-gene-275.0-mRNA-1  | NA | NA       |               | Os07g0103100 | OsR498G0713362700.01.T01 | Glutamate receptor                                                         |
| maker-12-augustus-gene-275.15-mRNA-1 | NA | NA       |               |              |                          | DDRCK domain-containing protein 1                                          |
| maker-12-augustus-gene-275.7-mRNA-1  | NA | NA       |               | Os11g0661600 | OsR498G0713365500.01.T01 | Peroxidase                                                                 |
| maker-12-augustus-gene-276.38-mRNA-1 | NA | NA       |               | Os07g0105200 | OsR498G0713368700.01.T01 |                                                                            |
| maker-12-augustus-gene-276.40-mRNA-1 | NA | NA       |               | Os07g0105600 | OsR498G0713369300.01.T01 | Photosynthetic NDH subunit of luminal location 3 chloroplastic             |
| maker-12-augustus-gene-276.42-mRNA-1 | NA | NA       | LRR           | Os07g0106100 | OsR498G0713370900.01.T01 | Dynein assembly factor 1, axonemal                                         |
| maker-12-augustus-gene-276.46-mRNA-1 | NA | NA       |               | 0            | OsR498G0713372100.01.T01 |                                                                            |
| maker-12-augustus-gene-276.48-mRNA-1 | NA | NA       |               | Os07g0105700 | OsR498G0713369200.01.T01 | Kinesin-like protein KIN-14N                                               |
| maker-12-augustus-gene-276.55-mRNA-1 | NA | NA       |               | Os07g0106000 | OsR498G0713370800.01.T01 | Metallophos domain-containing protein                                      |
| maker-12-augustus-gene-276.59-mRNA-1 | NA | NA       |               | Os07g0106200 | OsR498G0713371200.01.T02 | Sugar carrier protein C                                                    |
| maker-12-augustus-gene-276.61-mRNA-1 | NA | NA       |               | 0            | OsR498G0713372400.01.T01 |                                                                            |
| maker-12-augustus-gene-277.29-mRNA-1 | NA | NA       |               | Os07g0107900 | OsR498G0713375100.01.T01 | Strictosidine synthase 1                                                   |
| maker-12-augustus-gene-277.31-mRNA-1 | NA | NA       |               |              |                          | WD-40 repeat protein-like                                                  |
| maker-12-augustus-gene-277.36-mRNA-1 | NA | NA       |               | Os07g0108100 | OsR498G0713375700.01.T05 | Senescence-specific cysteine protease SAG39                                |
| maker-12-augustus-gene-277.39-mRNA-1 | NA | NA       |               | Os07g0108200 | OsR498G0713376000.01.T01 | Protein DETOXIFICATION                                                     |
| maker-12-augustus-gene-277.43-mRNA-1 | NA | NA       |               | Os07g0108300 | OsR498G0713376200.01.T01 | Glutamate-glyoxylate aminotransferase                                      |
| maker-12-augustus-gene-277.49-mRNA-1 | NA | NA       |               | Os07g0108400 |                          | Alanine amino transferase8                                                 |
| maker-12-augustus-gene-277.51-mRNA-1 | NA | NA       |               | Os07g0108500 | OsR498G0713377000.01.T01 | Alanine amino transferase8                                                 |
| maker-12-augustus-gene-277.53-mRNA-1 | NA | NA       |               | Os07g0108900 | OsR498G0713378400.01.T03 | MADS-box transcription factor 15                                           |



|                                      |    |          |           |              |                           |                                                                        |
|--------------------------------------|----|----------|-----------|--------------|---------------------------|------------------------------------------------------------------------|
| maker-12-augustus-gene-278.0-mRNA-1  | NA | NA       |           | 0            | OsR498G0713381900.01.T01  | FCP1 homology domain-containing protein (Fragment)                     |
| maker-12-augustus-gene-278.12-mRNA-1 | NA | NA       |           | 0            | OsR498G0713384500.01.T01  |                                                                        |
| maker-12-augustus-gene-278.16-mRNA-1 | NA | NA       |           | Os07g0110300 | OsR498G0713385500.01.T02  | Adrenodoxin-like protein 2 mitochondrial                               |
| maker-12-augustus-gene-278.20-mRNA-1 | NA | NA       |           | 0            | OsR498G0713385700.01.T01  | Sister chromatid cohesion protein (Fragment)                           |
| maker-12-augustus-gene-278.27-mRNA-1 | NA | NA       |           | Os07g0110500 | OsR498G0713386100.01.T01  |                                                                        |
| maker-12-augustus-gene-278.30-mRNA-1 | NA | NA       |           | Os07g0109500 | OsR498G0713382600.01.T01  | Ribosomal protein L13a                                                 |
| maker-12-augustus-gene-278.33-mRNA-1 | NA | Indica   |           | Os12g0579000 | OsR498G0713382800.01.T01  | RNA polymerase-associated protein LEO1                                 |
| maker-12-augustus-gene-278.42-mRNA-1 | NA | NA       |           | Os07g0109700 | OsR498G0713383000.01.T01  |                                                                        |
| maker-12-augustus-gene-278.44-mRNA-1 | NA | NA       |           | Os07g0110600 | OsR498G0713386600.01.T01  |                                                                        |
| maker-12-augustus-gene-278.5-mRNA-1  | NA | NA       |           | Os07g0109400 | OsR498G0713382300.01.T01  | VARLMGL domain-containing protein                                      |
| maker-12-augustus-gene-278.8-mRNA-1  | NA | NA       |           | Os07g0109800 | OsR498G0713383100.01.T01  |                                                                        |
| maker-12-augustus-gene-279.48-mRNA-1 | NA | NA       |           | Os07g0110900 | OsR498G0713388300.01.T01  |                                                                        |
| maker-12-augustus-gene-279.51-mRNA-1 | NA | NA       |           |              |                           |                                                                        |
| maker-12-augustus-gene-279.55-mRNA-1 | NA | NA       |           | Os07g0111600 | OsR498G0713391900.01.T01  | Purple acid phosphatase                                                |
| maker-12-augustus-gene-279.57-mRNA-1 | NA | NA       |           | Os07g0112100 | OsR498G0713394500.01.T04  | Flavin-containing monooxygenase                                        |
| maker-12-augustus-gene-279.59-mRNA-1 | NA | NA       |           | Os07g0110800 | OsR498G0713388200.01.T01  |                                                                        |
| maker-12-augustus-gene-279.61-mRNA-1 | NA | NA       |           | Os07g0111400 | OsR498G0713390000.01.T01  | WRKY transcription factor 4                                            |
| maker-12-augustus-gene-28.0-mRNA-1   | NA | Japonica |           | Os12g0152500 | OsR498G1220951300.01.T01  | AB hydrolase-1 domain-containing protein (Fragment)                    |
| maker-12-augustus-gene-28.12-mRNA-1  | NA | NA       |           | Os12g0152600 | OsR498G1220953200.01.T03  | 2-methoxy-6-polyprenyl-1,4-benzoquinol methylase, mitochondrial        |
| maker-12-augustus-gene-28.14-mRNA-1  | NA | Indica   |           | Os12g0152700 | OsR498G1220953400.01.T02  | ACT domain-containing protein isoform 1                                |
| maker-12-augustus-gene-28.19-mRNA-1  | NA | NA       |           | Os12g0152900 | OsR498G1220954200.01.T01  | Transcription factor TGAL11                                            |
| maker-12-augustus-gene-28.25-mRNA-1  | NA | NA       |           | Os12g0154600 | OsR498G1220960000.01.T03  | TPT domain-containing protein                                          |
| maker-12-augustus-gene-28.4-mRNA-1   | NA | NA       |           | Os12g0153500 | OsR498G1220958500.01.T01  | Bifunctional monodehydroascorbate reductase and carbonic anhydrase nec |
| maker-12-augustus-gene-28.9-mRNA-1   | NA | NA       |           | 0            | OsR498G1220952600.01.T01  | C2H2-type domain-containing protein                                    |
| maker-12-augustus-gene-280.0-mRNA-1  | NA | NA       |           | Os07g0112800 | OsR498G0713396500.01.T06  | Eukaryotic translation initiation factor 5A                            |
| maker-12-augustus-gene-280.12-mRNA-1 | NA | NA       |           | 0            | OsR498G0713398500.01.T01  |                                                                        |
| maker-12-augustus-gene-280.14-mRNA-1 | NA | NA       |           | Os07g0112400 |                           | 3'-5' exonuclease domain-containing protein                            |
| maker-12-augustus-gene-280.15-mRNA-1 | NA | NA       |           | Os07g0112700 | OsR498G0713396200.01.T02  | Phytoeyanin domain-containing protein (Fragment)                       |
| maker-12-augustus-gene-280.17-mRNA-1 | NA | NA       |           | Os07g0113200 | OsR498G0713397600.01.T02  |                                                                        |
| maker-12-augustus-gene-280.20-mRNA-1 | NA | NA       |           |              |                           | FBD domain-containing protein                                          |
| maker-12-augustus-gene-280.30-mRNA-1 | NA | NA       |           | Os07g0114000 | OsR498G0713401800.01.T01  | Protein-serine/threonine phosphatase                                   |
| maker-12-augustus-gene-280.6-mRNA-1  | NA | NA       |           | 0            | OsR498G0713397700.01.T01  |                                                                        |
| maker-12-augustus-gene-280.9-mRNA-1  | NA | NA       |           | Os07g0111001 | OsR498G0713398300.01.T01  |                                                                        |
| maker-12-augustus-gene-281.0-mRNA-1  | NA | NA       |           | Os07g0114300 | OsR498G0713402900.01.T03  | C2 domain-containing protein                                           |
| maker-12-augustus-gene-281.10-mRNA-1 | NA | NA       | LRR-TM    | Os07g0115400 |                           | LRR receptor-like serine/threonine-protein kinase FLS2                 |
| maker-12-augustus-gene-281.15-mRNA-1 | NA | NA       | Kinase-TM | Os07g0114400 | OsR498G0713403200.01.T01  | CK2 protein kinase alpha 4                                             |
| maker-12-augustus-gene-281.20-mRNA-1 | NA | NA       |           | 0            | OsR498G0713405400.01.T01  |                                                                        |
| maker-12-augustus-gene-281.22-mRNA-1 | NA | NA       |           | Os07g0115200 | OsR498G0713405600.01.T01  |                                                                        |
| maker-12-augustus-gene-281.23-mRNA-1 | NA | NA       |           | Os07g0115700 |                           | Retrotransposon protein, putative, LINE subclass                       |
| maker-12-augustus-gene-281.3-mRNA-1  | NA | NA       |           | Os07g0114500 | OsR498G0713403700.01.T01  |                                                                        |
| maker-12-augustus-gene-281.6-mRNA-1  | NA | NA       |           | 0            | OsR498G0713404100.01.T01  |                                                                        |
| maker-12-augustus-gene-281.8-mRNA-1  | NA | NA       |           | Os07g0115300 | OsR498G0713405700.01.T01  | Peroxidase                                                             |
| maker-12-augustus-gene-282.38-mRNA-1 | NA | NA       |           |              |                           | Cyclic nucleotide-binding domain-containing protein                    |
| maker-12-augustus-gene-282.45-mRNA-1 | NA | NA       |           | Os04g0559100 | OsR498G04090663900.01.T02 | PRONE domain                                                           |
| maker-12-augustus-gene-282.50-mRNA-1 | NA | NA       |           | Os04g0559700 | OsR498G0409066100.01.T01  | Aquaporin                                                              |
| maker-12-augustus-gene-282.53-mRNA-1 | NA | NA       |           | Os04g0557800 | OsR498G04090662200.01.T01 | Anthocyanin regulatory R-S protein-like                                |
| maker-12-augustus-gene-282.56-mRNA-1 | NA | NA       |           | Os04g0558500 | OsR498G04090662800.01.T01 |                                                                        |
| maker-12-augustus-gene-282.58-mRNA-1 | NA | NA       |           | Os04g0559200 | OsR498G04090664200.01.T01 | DUF4378 domain-containing protein (Fragment)                           |
| maker-12-augustus-gene-282.60-mRNA-1 | NA | NA       |           | Os04g0559400 | OsR498G04090665000.01.T01 | Branched-chain-amino-acid aminotransferase                             |
| maker-12-augustus-gene-282.64-mRNA-1 | NA | NA       | Kinase    | Os04g0559800 | OsR498G0409066400.01.T05  | Putative MAPKKK family protein kinase isoform 1                        |
| maker-12-augustus-gene-283.0-mRNA-1  | NA | NA       |           | Os04g0560200 | OsR498G0409067100.01.T01  | Thioredoxin                                                            |
| maker-12-augustus-gene-283.10-mRNA-1 | NA | NA       |           | Os04g0560700 | OsR498G0409068300.01.T01  |                                                                        |
| maker-12-augustus-gene-283.12-mRNA-1 | NA | NA       |           | Os04g0561000 | OsR498G0409068700.01.T01  | Mechanosensitive ion channel protein 6                                 |
| maker-12-augustus-gene-283.15-mRNA-1 | NA | NA       |           | Os04g0561500 | OsR498G0409069500.01.T04  | Prolyl oligopeptidase                                                  |
| maker-12-augustus-gene-283.20-mRNA-1 | NA | NA       |           | Os04g0561600 | OsR498G0409069700.01.T04  | Coiled-coil domain-containing protein 124                              |
| maker-12-augustus-gene-283.22-mRNA-1 | NA | NA       |           | Os04g0562000 | OsR498G0409070900.01.T05  | S-acyltransferase                                                      |
| maker-12-augustus-gene-283.28-mRNA-1 | NA | NA       |           | Os05g0269800 | OsR498G04090509300.01.T01 | DDE Tnp4 domain-containing protein                                     |
| maker-12-augustus-gene-283.33-mRNA-1 | NA | NA       |           | Os04g0560300 | OsR498G0409067400.01.T01  | Histone lysine-specific demethylase                                    |
| maker-12-augustus-gene-283.35-mRNA-1 | NA | NA       | Kinase-TM | Os04g0560600 | OsR498G0409068000.01.T01  | Calcium-dependent protein kinase                                       |
| maker-12-augustus-gene-283.39-mRNA-1 | NA | NA       |           | Os04g0561200 | OsR498G0409069000.01.T01  | Cellular retinaldehyde-binding/triple function                         |
| maker-12-augustus-gene-283.4-mRNA-1  | NA | NA       |           | 0            | OsR498G0409067700.01.T05  | Amine oxidase                                                          |

|                                       |    |          |           |              |                          |                                                                                        |
|---------------------------------------|----|----------|-----------|--------------|--------------------------|----------------------------------------------------------------------------------------|
| maker-12-augustus-gene-283.41-mRNA-1  | NA | NA       |           | Os04g0561700 | OsR498G0409070000.01.T03 | tRNA pseudouridine(55) synthase                                                        |
| maker-12-augustus-gene-283.48-mRNA-1  | NA | NA       |           | 0            | OsR498G0409070600.01.T01 | GDSL esterase/lipase                                                                   |
| maker-12-augustus-gene-283.50-mRNA-1  | NA | NA       |           | Os04g0562100 | OsR498G0409071200.01.T02 | Lysine histidine transporter 7                                                         |
| maker-12-augustus-gene-284.28-mRNA-1  | NA | NA       |           | Os04g0562800 |                          | DUF632 domain-containing protein                                                       |
| maker-12-augustus-gene-284.32-mRNA-1  | NA | NA       |           | 0            | OsR498G0409074700.01.T03 | DUF295 domain-containing protein                                                       |
| maker-12-augustus-gene-284.34-mRNA-1  | NA | NA       |           | 0            | OsR498G0409073800.01.T02 | O-fucosyltransferase family protein (Fragment)                                         |
| maker-12-augustus-gene-284.38-mRNA-1  | NA | NA       |           | Os02g0670000 | OsR498G0409074600.01.T02 | Transmembrane protein 184C (Fragment)                                                  |
| maker-12-augustus-gene-284.41-mRNA-1  | NA | NA       | Kinase-TM |              |                          | Mitogen-activated protein kinase pmk-2 (inferred by orthology to a C. elegans protein) |
| maker-12-augustus-gene-284.44-mRNA-1  | NA | NA       |           |              |                          | Cyclin N-terminal domain-containing protein                                            |
| maker-12-augustus-gene-284.50-mRNA-1  | NA | NA       |           |              |                          | SSD domain-containing protein                                                          |
| maker-12-augustus-gene-285.1-mRNA-1   | NA | NA       |           | Os04g0564300 | OsR498G1222106000.01.T03 |                                                                                        |
| maker-12-augustus-gene-285.12-mRNA-1  | NA | NA       |           | 0            | OsR498G0409079500.01.T02 | Ser/Thr-rich protein T10 in DGCR region                                                |
| maker-12-augustus-gene-285.15-mRNA-1  | NA | NA       |           | Os04g0564600 | OsR498G0409079700.01.T04 | High mobility group box protein 2                                                      |
| maker-12-augustus-gene-285.18-mRNA-1  | NA | NA       |           | Os04g0565400 | OsR498G0409082100.01.T02 | Glycosyltransferase                                                                    |
| maker-12-augustus-gene-285.2-mRNA-1   | NA | NA       |           | Os04g0564200 | OsR498G0409079100.01.T03 | TPX2 domain-containing protein                                                         |
| maker-12-augustus-gene-285.20-mRNA-1  | NA | NA       | Kinase-TM | Os04g0563900 | OsR498G0409078000.01.T02 | probable serine/threonine-protein kinase PIX13                                         |
| maker-12-augustus-gene-285.22-mRNA-1  | NA | NA       |           | Os04g0564000 | OsR498G0409078800.01.T01 | RWP-RK domain-containing protein                                                       |
| maker-12-augustus-gene-285.26-mRNA-1  | NA | NA       |           | Os04g0564700 | OsR498G0409080000.01.T02 | Syntaxin-binding protein 5                                                             |
| maker-12-augustus-gene-286.14-mRNA-1  | NA | NA       |           | 0            | OsR498G0409083900.01.T02 | SWI/SNF-related matrix-associated actin-dependent regulator of chromatin               |
| maker-12-augustus-gene-286.20-mRNA-1  | NA | NA       |           | Os04g0565900 | OsR498G0409083600.01.T03 | Transcription factor bHLH111 isoform A                                                 |
| maker-12-augustus-gene-286.24-mRNA-1  | NA | NA       |           |              |                          | Piwi domain-containing protein                                                         |
| maker-12-augustus-gene-287.0-mRNA-1   | NA | NA       |           | Os04g0566600 | OsR498G0409089300.01.T01 | Putative Myb family transcription factor                                               |
| maker-12-augustus-gene-287.12-mRNA-1  | NA | NA       |           |              |                          | Gamma-tubulin complex component                                                        |
| maker-12-augustus-gene-287.15-mRNA-1  | NA | NA       |           | Os04g0567200 | OsR498G0409090800.01.T03 | Aluminum-activated malate transporter                                                  |
| maker-12-augustus-gene-287.3-mRNA-1   | NA | NA       |           | Os04g0567700 | OsR498G0409092500.01.T01 | ORMDL family                                                                           |
| maker-12-augustus-gene-287.6-mRNA-1   | NA | NA       |           | 0            | OsR498G0409090000.01.T02 | Spc97 / Spc98 family of spindle pole body (SBP) component                              |
| maker-12-augustus-gene-288.102-mRNA-1 | NA | NA       |           | Os02g0523300 | OsR498G0203961600.01.T02 | Gamma-tubulin complex component                                                        |
| maker-12-augustus-gene-288.111-mRNA-1 | NA | NA       |           | 0            | OsR498G0409098600.01.T03 | MHD2 domain-containing protein                                                         |
| maker-12-augustus-gene-288.114-mRNA-1 | NA | NA       |           | Os04g0568900 | OsR498G0409099000.01.T01 | Putative RING zinc finger domain superfamily protein                                   |
| maker-12-augustus-gene-288.118-mRNA-1 | NA | NA       |           | Os04g0569100 | OsR498G0409099800.01.T02 | Homeobox-leucine zipper protein ROC5                                                   |
| maker-12-augustus-gene-288.120-mRNA-1 | NA | NA       |           |              |                          | NAM-associated domain-containing protein                                               |
| maker-12-augustus-gene-288.123-mRNA-1 | NA | NA       | Kinase-TM | Os12g0606000 |                          | Lectin protein kinase, putative, expressed                                             |
| maker-12-augustus-gene-288.80-mRNA-1  | NA | NA       |           | Os04g0568400 | OsR498G0409097500.01.T01 | WD repeat-containing protein 44                                                        |
| maker-12-augustus-gene-288.86-mRNA-1  | NA | NA       |           | Os04g0569000 | OsR498G0409099500.01.T01 | Replication factor C subunit 4                                                         |
| maker-12-augustus-gene-288.88-mRNA-1  | NA | NA       |           | Os12g0543600 | OsR498G1221807500.01.T01 | DAO domain-containing protein                                                          |
| maker-12-augustus-gene-288.90-mRNA-1  | NA | NA       | Kinase-TM | Os12g0606000 |                          | Lectin protein kinase, putative, expressed                                             |
| maker-12-augustus-gene-288.93-mRNA-1  | NA | NA       |           | Os02g0523300 | OsR498G0203961600.01.T02 | Gamma-tubulin complex component                                                        |
| maker-12-augustus-gene-29.0-mRNA-1    | NA | NA       |           | Os04g0530400 | OsR498G1220960500.01.T01 | SNARE-complex protein Syntaxin-18 N-terminal                                           |
| maker-12-augustus-gene-29.11-mRNA-1   | NA | NA       |           | 0            | OsR498G1220964700.01.T02 | Nuclear receptor coactivator 6-like                                                    |
| maker-12-augustus-gene-29.14-mRNA-1   | NA | NA       |           | Os12g0154700 | OsR498G1220961400.01.T01 | Germin-like protein 12-1                                                               |
| maker-12-augustus-gene-29.16-mRNA-1   | NA | NA       |           | Os12g0154800 | OsR498G1220962000.01.T01 | Germin-like protein 12-2                                                               |
| maker-12-augustus-gene-29.18-mRNA-1   | NA | NA       |           | Os12g0154900 | OsR498G1220962200.01.T01 | Germin-like protein 8-8                                                                |
| maker-12-augustus-gene-29.20-mRNA-1   | NA | Indica   |           | Os11g0153400 | OsR498G1220963800.01.T02 | Rho GTPase-activating protein gacA                                                     |
| maker-12-augustus-gene-3.103-mRNA-1   | NA | NA       |           | Os11g0106400 | OsR498G1119292600.01.T02 | E1 ubiquitin-activating enzyme                                                         |
| maker-12-augustus-gene-3.35-mRNA-1    | NA | NA       |           | Os12g0104700 | OsR498G1220795300.01.T01 | Protein trichome birefringence-like 28                                                 |
| maker-12-augustus-gene-3.40-mRNA-1    | NA | NA       |           | 0            | OsR498G1119287500.01.T03 | Clathrin heavy chain                                                                   |
| maker-12-augustus-gene-3.43-mRNA-1    | NA | NA       |           | 0            | OsR498G1220795500.01.T05 | Clathrin heavy chain                                                                   |
| maker-12-augustus-gene-30.0-mRNA-1    | NA | NA       |           | Os12g0156400 | OsR498G1220970700.01.T01 | mRNA-decapping enzyme-like protein isoform X1                                          |
| maker-12-augustus-gene-30.11-mRNA-1   | NA | NA       |           | Os08g0487300 | OsR498G0816350400.01.T01 | Transposon protein, putative, Mutator sub-class                                        |
| maker-12-augustus-gene-30.14-mRNA-1   | NA | Indica   |           | Os12g0157000 | OsR498G1220973000.01.T01 | TF-B3 domain-containing protein (Fragment)                                             |
| maker-12-augustus-gene-30.16-mRNA-1   | NA | NA       |           | Os12g0157200 | OsR498G1220974400.01.T03 | TLDC domain-containing protein (Fragment)                                              |
| maker-12-augustus-gene-30.6-mRNA-1    | NA | Indica   |           | Os11g0155500 | OsR498G1220972100.01.T01 | Amino acid permease family protein, expressed                                          |
| maker-12-augustus-gene-30.9-mRNA-1    | NA | Japonica |           | Os12g0157700 | OsR498G1220975700.01.T01 |                                                                                        |
| maker-12-augustus-gene-31.0-mRNA-1    | NA | Indica   |           | Os12g0158600 | OsR498G1220981300.01.T01 |                                                                                        |
| maker-12-augustus-gene-31.5-mRNA-1    | NA | NA       |           | Os12g0158800 | OsR498G1220982600.01.T01 | E2F-DP-type transcription factor (Fragment)                                            |
| maker-12-augustus-gene-32.45-mRNA-1   | NA | NA       |           | Os12g0160900 |                          |                                                                                        |
| maker-12-augustus-gene-32.47-mRNA-1   | NA | Japonica |           | Os12g0159700 | OsR498G1220985400.01.T01 | Retrotransposon protein, putative, unclassified, expressed                             |
| maker-12-augustus-gene-32.51-mRNA-1   | NA | NA       |           | Os12g0160200 | OsR498G1220986800.01.T01 | Large proline-rich protein BAG6-like                                                   |
| maker-12-augustus-gene-33.12-mRNA-1   | NA | NA       |           |              |                          | Putative serine/threonine-protein kinase WNK9                                          |
| maker-12-augustus-gene-33.5-mRNA-1    | NA | Indica   |           | Os12g0161700 | OsR498G1220995600.01.T01 | PHD-finger family protein expressed (Fragment)                                         |
| maker-12-augustus-gene-37.20-mRNA-1   | NA | NA       |           |              |                          | NAM-associated domain-containing protein                                               |

|                                     |    |          |           |              |                          |                                                                            |
|-------------------------------------|----|----------|-----------|--------------|--------------------------|----------------------------------------------------------------------------|
| maker-12-augustus-gene-4.46-mRNA-1  | NA | NA       |           | Os12g0106500 | OsR498G1220801500.01.T01 | Nodulin-like domain-containing protein (Fragment)                          |
| maker-12-augustus-gene-4.50-mRNA-1  | NA | NA       |           |              |                          | Protein DETOXIFICATION                                                     |
| maker-12-augustus-gene-4.63-mRNA-1  | NA | NA       |           | Os12g0108000 | OsR498G1220805900.01.T01 | Laccase                                                                    |
| maker-12-augustus-gene-4.66-mRNA-1  | NA | NA       |           | Os12g0106550 | OsR498G1220802000.01.T01 | 4-hydroxyphenylpyruvate dioxygenase                                        |
| maker-12-augustus-gene-42.4-mRNA-1  | NA | NA       |           | Os12g0180600 |                          |                                                                            |
| maker-12-augustus-gene-43.0-mRNA-1  | NA | NA       |           |              |                          |                                                                            |
| maker-12-augustus-gene-43.10-mRNA-1 | NA | NA       |           |              |                          | Protein kinase domain-containing protein                                   |
| maker-12-augustus-gene-43.6-mRNA-1  | NA | Japonica |           | Os12g0180833 | OsR498G0409083600.01.T03 |                                                                            |
| maker-12-augustus-gene-43.8-mRNA-1  | NA | NA       | Kinase-TM | 0            | OsR498G1221046200.01.T01 | Protein kinase protein with adenine nucleotide alpha hydrolase-like domain |
| maker-12-augustus-gene-43.9-mRNA-1  | NA | NA       | Kinase-TM | 0            | OsR498G1221046200.01.T01 | Proline-rich receptor-like protein kinase PERK13                           |
| maker-12-augustus-gene-45.31-mRNA-1 | NA | NA       |           | 0            | OsR498G0510234300.01.T01 | GRF zinc finger family protein, expressed                                  |
| maker-12-augustus-gene-5.18-mRNA-1  | NA | NA       | Kinase-TM | Os12g0108100 | OsR498G1220806200.01.T01 | Putative serine/threonine-protein kinase                                   |
| maker-12-augustus-gene-54.38-mRNA-1 | NA | NA       |           | Os01g0346501 |                          | Hydroxyproline-rich glycoprotein-like                                      |
| maker-12-augustus-gene-56.0-mRNA-1  | NA | Japonica |           | Os12g0202700 | OsR498G1221094300.01.T02 | Putative inactive methyltransferase                                        |
| maker-12-augustus-gene-56.2-mRNA-1  | NA | Japonica |           | Os12g0202800 | OsR498G1221094300.01.T02 | Putative inactive methyltransferase                                        |
| maker-12-augustus-gene-56.6-mRNA-1  | NA | NA       |           | Os12g0203200 |                          |                                                                            |
| maker-12-augustus-gene-58.24-mRNA-1 | NA | NA       |           | Os06g0598500 |                          | Ribulose bispophosphate carboxylase large chain                            |
| maker-12-augustus-gene-6.14-mRNA-1  | NA | NA       |           | Os11g0112200 | OsR498G1220817300.01.T01 | Peroxidase                                                                 |
| maker-12-augustus-gene-6.25-mRNA-1  | NA | NA       |           | Os12g0112300 | OsR498G1220818700.01.T05 | ADP,ATP carrier protein (Fragment)                                         |
| maker-12-augustus-gene-6.35-mRNA-1  | NA | NA       |           | 0            | OsR498G1220814400.01.T03 | DRBM domain-containing protein                                             |
| maker-12-augustus-gene-6.39-mRNA-1  | NA | NA       |           | Os12g0110000 | OsR498G1220814600.01.T02 | Regulatory-associated protein of TOR 1                                     |
| maker-12-augustus-gene-6.67-mRNA-1  | NA | Japonica |           | Os12g0111900 | OsR498G1119310800.01.T01 | Biogenesis of lysosome-related organelles complex 1 subunit 1              |
| maker-12-augustus-gene-60.60-mRNA-1 | NA | NA       |           | Os07g0485900 |                          | Transposable element protein, putative, MuDR                               |
| maker-12-augustus-gene-63.0-mRNA-1  | NA | NA       |           | Os09g0443400 | OsR498G0612110800.01.T01 | Glycine-rich RNA-binding protein-like                                      |
| maker-12-augustus-gene-63.1-mRNA-1  | NA | NA       |           |              |                          | Transposon protein, putative, CACTA, En/Spm sub-class                      |
| maker-12-augustus-gene-67.20-mRNA-1 | NA | NA       |           | Os03g0154300 | OsR498G1119934800.01.T01 |                                                                            |
| maker-12-augustus-gene-67.22-mRNA-1 | NA | NA       |           | Os12g0217300 | OsR498G1221121400.01.T01 |                                                                            |
| maker-12-augustus-gene-68.37-mRNA-1 | NA | NA       |           | Os12g0222500 |                          | Chitinase                                                                  |
| maker-12-augustus-gene-7.13-mRNA-1  | NA | NA       |           | Os11g0114700 | OsR498G1220847100.01.T02 | Nucleotidyltransferase family protein, putative, expressed                 |
| maker-12-augustus-gene-73.27-mRNA-1 | NA | NA       |           | 0            | OsR498G1221155300.01.T01 | PGG domain-containing protein                                              |
| maker-12-augustus-gene-75.7-mRNA-1  | NA | NA       |           | Os12g0233400 | OsR498G1221166100.01.T06 | C2H2-type domain-containing protein (Fragment)                             |
| maker-12-augustus-gene-8.63-mRNA-1  | NA | NA       |           | Os12g0116000 | OsR498G1220842300.01.T01 | Vacuolar-sorting receptor 1                                                |
| maker-12-augustus-gene-81.28-mRNA-1 | NA | Indica   |           | Os12g0242700 | OsR498G1221198900.01.T04 | Beta-ketoacyl-acyl carrier protein reductase                               |
| maker-12-augustus-gene-84.0-mRNA-1  | NA | Japonica | CC-NBS-TM | Os12g0246700 | OsR498G0407486900.01.T01 | NB-ARC domain containing protein, expressed                                |
| maker-12-augustus-gene-85.0-mRNA-1  | NA | NA       |           | 0            | OsR498G0612461700.01.T02 |                                                                            |
| maker-12-augustus-gene-87.0-mRNA-1  | NA | Japonica |           | Os12g0535400 | OsR498G0305726100.01.T03 | AB hydrolase-1 domain-containing protein                                   |
| maker-12-augustus-gene-87.1-mRNA-1  | NA | NA       |           | Os12g0535400 | OsR498G1221763400.01.T07 | AB hydrolase-1 domain-containing protein                                   |
| maker-12-augustus-gene-87.6-mRNA-1  | NA | NA       |           | Os12g0250900 |                          | BRCT domain-containing protein                                             |
| maker-12-augustus-gene-89.25-mRNA-1 | NA | NA       |           |              |                          | MULE domain-containing protein                                             |
| maker-12-augustus-gene-9.34-mRNA-1  | NA | NA       |           | Os12g0117800 | OsR498G1119331000.01.T02 | NAM-associated domain-containing protein                                   |
| maker-12-augustus-gene-9.8-mRNA-1   | NA | Japonica |           | Os12g0118400 | OsR498G0713610100.01.T02 | Potassium uptake channel                                                   |
| maker-12-augustus-gene-9.9-mRNA-1   | NA | Japonica |           | Os12g0118400 | OsR498G1119332100.01.T03 | 2-hydroxy-6-oxononadienedioate/2-hydroxy-6- oxononatrienedioate hydrolase  |
| maker-12-augustus-gene-90.48-mRNA-1 | NA | NA       |           | Os12g0255200 |                          | Staphylococcal-like nuclease CAN1                                          |
| maker-12-augustus-gene-93.3-mRNA-1  | NA | NA       |           | Os08g0514800 |                          | Ptta/En/Spm family plant transposase                                       |
| maker-12-augustus-gene-95.34-mRNA-1 | NA | NA       |           | Os12g0263900 |                          |                                                                            |
| maker-12-augustus-gene-95.53-mRNA-1 | NA | NA       |           |              |                          | Cyprosin                                                                   |
| maker-2-augustus-gene-0.0-mRNA-1    | NA | NA       |           | Os02g0100300 | OsR498G0202797100.01.T02 | Hsp70-interacting protein 1                                                |
| maker-2-augustus-gene-0.11-mRNA-1   | NA | NA       |           | Os02g0100100 | OsR498G0202796800.01.T01 | Protein disulfide-isomerase                                                |
| maker-2-augustus-gene-0.15-mRNA-1   | NA | NA       |           | Os02g0100200 | OsR498G0202797000.01.T03 | Enhancer of polycomb-like protein                                          |
| maker-2-augustus-gene-0.18-mRNA-1   | NA | NA       |           | Os02g0101000 | OsR498G0202799600.01.T06 | Transmembrane amino acid transporter                                       |
| maker-2-augustus-gene-0.5-mRNA-1    | NA | NA       |           | Os02g0100700 | OsR498G0202798900.01.T05 | Aldehyde dehydrogenase                                                     |
| maker-2-augustus-gene-1.37-mRNA-1   | NA | NA       |           | Os02g0101100 | OsR498G0202800100.01.T01 | Translation initiation factor                                              |
| maker-2-augustus-gene-1.40-mRNA-1   | NA | Indica   |           | Os02g0101400 | OsR498G0202801700.01.T02 | GDSL esterase/lipase                                                       |
| maker-2-augustus-gene-1.60-mRNA-1   | NA | NA       |           |              |                          | Hydroxypyruvate reductase                                                  |
| maker-2-augustus-gene-1.74-mRNA-1   | NA | NA       |           |              |                          | Kinesin-like protein KIN-6 isoform X4                                      |
| maker-2-augustus-gene-10.36-mRNA-1  | NA | NA       |           | Os02g0118400 | OsR498G0202854500.01.T01 | CMP-N-acetylneuraminate-beta-galactosamide-alpha-2, 3-sialyltransferase 1  |
| maker-2-augustus-gene-10.48-mRNA-1  | NA | NA       |           |              |                          | Disease resistance protein RGA2                                            |
| maker-2-augustus-gene-10.50-mRNA-1  | NA | NA       | NBS-TM    |              |                          | Putative disease resistance protein RGA4                                   |
| maker-2-augustus-gene-10.55-mRNA-1  | NA | NA       |           | Os02g0119200 | OsR498G0202858300.01.T01 | Acetate/butyrate--CoA ligase AAE7, peroxisomal                             |
| maker-2-augustus-gene-10.57-mRNA-1  | NA | NA       |           | Os02g0119300 | OsR498G0202858500.01.T01 | Zn-dependent exopeptidase superfamily protein                              |
| maker-2-augustus-gene-10.63-mRNA-1  | NA | NA       |           | 0            | OsR498G0202859900.01.T01 | E3 ubiquitin-protein ligase UBR3 (Fragment)                                |

|                                     |    |          |               |              |                          |                                                                           |
|-------------------------------------|----|----------|---------------|--------------|--------------------------|---------------------------------------------------------------------------|
| maker-2-augustus-gene-10.65-mRNA-1  | NA | NA       |               | Os02g0119800 | OsR498G0202860500.01.T03 | Choline/ethanolaminephosphotransferase 1                                  |
| maker-2-augustus-gene-10.68-mRNA-1  | NA | NA       |               | 0            | OsR498G0202860500.01.T02 | GDSL esterase/lipase                                                      |
| maker-2-augustus-gene-10.70-mRNA-1  | NA | NA       |               | 0            | OsR498G0202854800.01.T01 |                                                                           |
| maker-2-augustus-gene-10.72-mRNA-1  | NA | NA       |               | 0            | OsR498G0202858200.01.T01 | AUGMIN subunit 4                                                          |
| maker-2-augustus-gene-10.77-mRNA-1  | NA | NA       |               | Os02g0119400 | OsR498G0202859000.01.T03 | Syntaxin-52                                                               |
| maker-2-augustus-gene-10.84-mRNA-1  | NA | NA       |               | Os02g0120000 | OsR498G0202860800.01.T06 | Smr domain-containing protein (Fragment)                                  |
| maker-2-augustus-gene-10.86-mRNA-1  | NA | NA       | Kinase-TM     | Os02g0120100 | OsR498G0202861000.01.T04 | Serine/threonine-protein kinase STY46                                     |
| maker-2-augustus-gene-101.49-mRNA-1 | NA | NA       |               | 0            | OsR498G0203400800.01.T03 | CRC domain-containing protein                                             |
| maker-2-augustus-gene-102.0-mRNA-1  | NA | NA       |               | Os02g0277600 | OsR498G0203408300.01.T02 | Adrenodoxin-NADP(+) reductase                                             |
| maker-2-augustus-gene-102.18-mRNA-1 | NA | NA       |               | Os02g0276900 | OsR498G0203406200.01.T05 | Transcription factor bHLH68                                               |
| maker-2-augustus-gene-102.24-mRNA-1 | NA | NA       | Kinase-LRR-TM | 0            | OsR498G0203410200.01.T02 | Putative leucine-rich repeat receptor-like protein kinase                 |
| maker-2-augustus-gene-107.34-mRNA-1 | NA | NA       | Kinase-LRR-TM | Os02g0283800 | OsR498G0203424500.01.T01 | BRASSINOSTEROID INSENSITIVE 1-associated receptor kinase 1, putative, exp |
| maker-2-augustus-gene-107.42-mRNA-1 | NA | NA       |               | Os02g0285300 | OsR498G0203429800.01.T01 | Developmentally regulated plasma membrane polypeptide                     |
| maker-2-augustus-gene-107.44-mRNA-1 | NA | NA       | Kinase-TM     | 0            | OsR498G0203430400.01.T02 | serine/threonine-protein kinase RHS3                                      |
| maker-2-augustus-gene-108.0-mRNA-1  | NA | NA       |               | Os02g0285800 | OsR498G0203431100.01.T03 | Elongation factor family protein isoform 1                                |
| maker-2-augustus-gene-108.10-mRNA-1 | NA | NA       |               | Os02g0286933 |                          |                                                                           |
| maker-2-augustus-gene-108.14-mRNA-1 | NA | NA       | LRR-NBS-TM    | Os02g0286700 |                          | Putative stripe rust resistance protein Yr10                              |
| maker-2-augustus-gene-108.17-mRNA-1 | NA | NA       |               | Os02g0287000 | OsR498G0203436600.01.T01 |                                                                           |
| maker-2-augustus-gene-108.7-mRNA-1  | NA | Indica   |               | Os03g0711650 | OsR498G0203433300.01.T01 | AT hook motif family protein, expressed                                   |
| maker-2-augustus-gene-109.44-mRNA-1 | NA | NA       |               | Os02g0288100 | OsR498G0203439000.01.T01 | Pectinesterase                                                            |
| maker-2-augustus-gene-109.48-mRNA-1 | NA | Indica   |               | Os02g0288733 | OsR498G0203440600.01.T01 | ABC transporter C family member 3                                         |
| maker-2-augustus-gene-11.0-mRNA-1   | NA | NA       |               | Os02g0120300 | OsR498G0202862500.01.T01 | Methyltransferase-like protein 23                                         |
| maker-2-augustus-gene-11.11-mRNA-1  | NA | NA       |               | Os02g0121700 | OsR498G0202869300.01.T01 | Linalool synthase, chloroplastic                                          |
| maker-2-augustus-gene-11.14-mRNA-1  | NA | NA       |               | Os02g0121800 | OsR498G0202869500.01.T01 | Succinate dehydrogenase subunit 3                                         |
| maker-2-augustus-gene-11.15-mRNA-1  | NA | Indica   |               | Os02g0120400 | OsR498G0202862800.01.T02 | Actin-binding transcription modulator                                     |
| maker-2-augustus-gene-11.19-mRNA-1  | NA | NA       |               | Os02g0120500 | OsR498G0202863200.01.T01 | Transcription factor ABORTED MICROSPORES                                  |
| maker-2-augustus-gene-11.22-mRNA-1  | NA | NA       |               | Os02g0120800 | OsR498G0202863800.01.T02 | Rac-like GTP-binding protein ARAC3                                        |
| maker-2-augustus-gene-11.25-mRNA-1  | NA | NA       |               | Os02g0120900 | OsR498G0202864000.01.T01 | Methenyltetrahydrofolate cyclohydrolase                                   |
| maker-2-augustus-gene-11.27-mRNA-1  | NA | NA       |               | Os02g0121000 | OsR498G0202864400.01.T01 | Glutamyl-tRNA synthetase                                                  |
| maker-2-augustus-gene-11.34-mRNA-1  | NA | NA       |               | Os02g0121200 | OsR498G0202865800.01.T02 | U6 small nuclear RNA (adenine-(43)-N(6))-methyltransferase                |
| maker-2-augustus-gene-11.38-mRNA-1  | NA | NA       |               | 0            | OsR498G0202867600.01.T01 |                                                                           |
| maker-2-augustus-gene-11.41-mRNA-1  | NA | Japonica |               | Os02g0121500 | OsR498G0202867800.01.T01 |                                                                           |
| maker-2-augustus-gene-11.5-mRNA-1   | NA | NA       |               | Os02g0120600 | OsR498G0202863500.01.T01 | UBC core domain-containing protein (Fragment)                             |
| maker-2-augustus-gene-110.0-mRNA-1  | NA | NA       |               | Os02g0290400 | OsR498G0203449900.01.T01 | Nucleolar essential protein-related                                       |
| maker-2-augustus-gene-110.12-mRNA-1 | NA | NA       |               | Os02g0290500 | OsR498G0203450200.01.T01 | Phosphatidylinositol 4-kinase type 2-beta                                 |
| maker-2-augustus-gene-110.14-mRNA-1 | NA | Indica   |               | Os02g0290600 | OsR498G0203450400.01.T01 | Dipeptidyl aminopeptidase/acylaminoacyl-peptidase                         |
| maker-2-augustus-gene-110.18-mRNA-1 | NA | NA       |               | 0            | OsR498G0203451400.01.T01 | Calcineurin B-like protein 7                                              |
| maker-2-augustus-gene-110.4-mRNA-1  | NA | Japonica |               | Os02g0290900 | OsR498G0203451100.01.T01 | SGNH hydrolase-type esterase superfamily protein                          |
| maker-2-augustus-gene-110.9-mRNA-1  | NA | NA       |               | Os02g0290300 | OsR498G0203449400.01.T03 | Activating molecule in BECN1-regulated autophagy protein 1                |
| maker-2-augustus-gene-111.37-mRNA-1 | NA | NA       |               |              |                          |                                                                           |
| maker-2-augustus-gene-111.45-mRNA-1 | NA | NA       |               | 0            | OsR498G0203455200.01.T03 | Calcineurin B-like protein 8                                              |
| maker-2-augustus-gene-111.49-mRNA-1 | NA | NA       |               | 0            | OsR498G0203456000.01.T01 |                                                                           |
| maker-2-augustus-gene-118.40-mRNA-1 | NA | NA       |               | Os02g0302900 | OsR498G0203503300.01.T02 | Reticulon domain-containing protein (Fragment)                            |
| maker-2-augustus-gene-119.1-mRNA-1  | NA | NA       |               | Os02g0305801 | OsR498G0203517300.01.T04 | EKC/KEOPS complex, subunit Pcc1                                           |
| maker-2-augustus-gene-12.101-mRNA-1 | NA | NA       |               | Os02g0123600 | OsR498G0202874400.01.T02 | CDP-diacylglycerol--inositol 3-phosphatidyltransferase                    |
| maker-2-augustus-gene-12.42-mRNA-1  | NA | NA       |               | Os02g0122100 |                          | Poly(A) polymerase cid                                                    |
| maker-2-augustus-gene-12.45-mRNA-1  | NA | NA       |               | 0            | OsR498G0202872300.01.T01 | Histone-lysine N-methyltransferase ATXR6                                  |
| maker-2-augustus-gene-12.47-mRNA-1  | NA | Indica   | Kinase        | Os02g0123100 | OsR498G0202873300.01.T01 | Cell division control protein 2 like A                                    |
| maker-2-augustus-gene-12.51-mRNA-1  | NA | NA       |               | 0            | OsR498G0202873500.01.T02 | Peroxisomal membrane protein PEX16                                        |
| maker-2-augustus-gene-12.54-mRNA-1  | NA | Indica   |               | Os07g0124500 | OsR498G0202873700.01.T01 | Eukaryotic translation initiation factor 3 subunit C                      |
| maker-2-augustus-gene-12.58-mRNA-1  | NA | NA       |               | Os02g0123700 | OsR498G0202874500.01.T01 | Endoglucanase                                                             |
| maker-2-augustus-gene-12.59-mRNA-1  | NA | NA       |               | 0            | OsR498G0202875100.01.T02 | Collagen triple helix repeat-containing protein (Fragment)                |
| maker-2-augustus-gene-12.63-mRNA-1  | NA | NA       |               | Os02g0122000 | OsR498G0202870200.01.T02 | Histone deacetylase complex subunit SAP18                                 |
| maker-2-augustus-gene-12.68-mRNA-1  | NA | NA       |               | 0            | OsR498G0202870600.01.T02 | Protein DETOXIFICATION 46, chloroplastic                                  |
| maker-2-augustus-gene-12.75-mRNA-1  | NA | NA       |               | Os02g0122300 | OsR498G0202870800.01.T02 | Eukaryotic translation initiation factor 3 subunit J                      |
| maker-2-augustus-gene-12.79-mRNA-1  | NA | NA       |               | 0            | OsR498G0202871200.01.T02 | Protein ACCUMULATION AND REPLICATION OF CHLOROPLASTS 6 chloroplast        |
| maker-2-augustus-gene-12.83-mRNA-1  | NA | NA       |               | 0            | OsR498G0202871400.01.T02 | Nucleosomal histone kinase                                                |
| maker-2-augustus-gene-12.85-mRNA-1  | NA | NA       |               | Os02g0122800 | OsR498G0202872600.01.T02 | Arginine/serine-rich splicing factor                                      |
| maker-2-augustus-gene-12.90-mRNA-1  | NA | NA       |               | 0            | OsR498G0202872800.01.T01 | rRNA adenine N(6)-methyltransferase                                       |
| maker-2-augustus-gene-12.93-mRNA-1  | NA | Indica   |               | Os02g0123400 | OsR498G0202874000.01.T05 | Putative caffeine synthase 4 (Fragment)                                   |
| maker-2-augustus-gene-12.96-mRNA-1  | NA | NA       |               | Os02g0123500 | OsR498G0202874200.01.T01 | NADP-dependent D-sorbitol-6-phosphate dehydrogenase-like                  |

|                                     |    |          |              |                          |                                                                        |
|-------------------------------------|----|----------|--------------|--------------------------|------------------------------------------------------------------------|
| maker-2-augustus-gene-128.37-mRNA-1 | NA | NA       | Os04g0120000 |                          | Transposon protein, putative, CACTA, En/Spm sub-class                  |
| maker-2-augustus-gene-13.0-mRNA-1   | NA | NA       | 0            | OsR498G0202876300.01.T01 | Transducin family protein / WD-40 repeat family protein                |
| maker-2-augustus-gene-13.10-mRNA-1  | NA | NA       | Os02g0125200 | OsR498G0202878100.01.T02 | AT-hook motif nuclear-localized protein (Fragment)                     |
| maker-2-augustus-gene-13.13-mRNA-1  | NA | NA       | Os02g0125300 | OsR498G0202878700.01.T01 | Bax inhibitor like                                                     |
| maker-2-augustus-gene-13.17-mRNA-1  | NA | Indica   | Os02g0125400 | OsR498G0202878900.01.T01 | Cyclin                                                                 |
| maker-2-augustus-gene-13.19-mRNA-1  | NA | NA       | 0            | OsR498G0202879100.01.T01 | RNA-binding KH domain-containing protein PEPPER                        |
| maker-2-augustus-gene-13.21-mRNA-1  | NA | Indica   | Os04g0432400 | OsR498G0202879300.01.T03 | Beta-fructofuranosidase                                                |
| maker-2-augustus-gene-13.24-mRNA-1  | NA | NA       | 0            | OsR498G0202879500.01.T02 | Light-harvesting complex-like protein 3 isotype 1, chloroplastic       |
| maker-2-augustus-gene-13.28-mRNA-1  | NA | Indica   | Os02g0124600 | OsR498G0202876000.01.T01 | L-gulonolactone oxidase                                                |
| maker-2-augustus-gene-13.30-mRNA-1  | NA | Japonica | Os02g0124600 | OsR498G0202876200.01.T01 | L-gulonolactone oxidase                                                |
| maker-2-augustus-gene-13.32-mRNA-1  | NA | Indica   | Os04g0119500 | OsR498G0202876600.01.T01 | START domain-containing protein                                        |
| maker-2-augustus-gene-13.36-mRNA-1  | NA | NA       | Os02g0125100 | OsR498G0202878000.01.T01 | 3-isopropylmalate dehydratase                                          |
| maker-2-augustus-gene-13.41-mRNA-1  | NA | NA       |              |                          | General transcription and DNA repair factor IIH subunit TFB4 isoform B |
| maker-2-augustus-gene-13.8-mRNA-1   | NA | NA       | Os02g0125000 | OsR498G0202877500.01.T01 | Protein LOW PSII ACCUMULATION 2 chloroplastic                          |
| maker-2-augustus-gene-136.0-mRNA-1  | NA | NA       | 0            | OsR498G1221332900.01.T01 | Retrotransposon protein, putative, unclassified                        |
| maker-2-augustus-gene-137.10-mRNA-1 | NA | NA       | 0            | OsR498G1119271000.01.T01 | X8 domain-containing protein (Fragment)                                |
| maker-2-augustus-gene-138.1-mRNA-1  | NA | NA       |              |                          | ABC transporter domain-containing protein                              |
| maker-2-augustus-gene-138.7-mRNA-1  | NA | NA       | Os08g0390900 | OsR498G1221160700.01.T01 |                                                                        |
| maker-2-augustus-gene-14.42-mRNA-1  | NA | NA       | 0            | OsR498G0202880700.01.T01 |                                                                        |
| maker-2-augustus-gene-14.43-mRNA-1  | NA | NA       | Os02g0126400 | OsR498G0202882700.01.T02 | Calcium-dependent protein kinase, putative                             |
| maker-2-augustus-gene-14.50-mRNA-1  | NA | NA       | Os02g0126600 |                          |                                                                        |
| maker-2-augustus-gene-14.52-mRNA-1  | NA | NA       | Os02g0126800 | OsR498G0202883300.01.T01 | Golgi SNAP receptor complex member 1                                   |
| maker-2-augustus-gene-14.55-mRNA-1  | NA | Indica   | Os02g0127000 | OsR498G0202883700.01.T01 | ER membrane protein complex subunit 2-A                                |
| maker-2-augustus-gene-14.58-mRNA-1  | NA | NA       | Os02g0127800 | OsR498G0202885900.01.T01 | Xyloglucan endotransglucosylase/hydrolase                              |
| maker-2-augustus-gene-14.60-mRNA-1  | NA | NA       | 0            | OsR498G0202886100.01.T01 | Peroxidase 6 (Fragment)                                                |
| maker-2-augustus-gene-14.62-mRNA-1  | NA | NA       | Os02g0128100 | OsR498G0202886900.01.T01 | Phospholipid hydroperoxide glutathione peroxidase                      |
| maker-2-augustus-gene-14.65-mRNA-1  | NA | NA       | Os02g0126300 | OsR498G0202882200.01.T01 | 65-kDa microtubule-associated protein 3                                |
| maker-2-augustus-gene-14.67-mRNA-1  | NA | NA       | Os02g0126700 | OsR498G0202883200.01.T01 | Small nuclear ribonucleoprotein E                                      |
| maker-2-augustus-gene-14.71-mRNA-1  | NA | Japonica | Os02g0126900 | OsR498G0202883600.01.T01 | Phosphatidate cytidyltransferase                                       |
| maker-2-augustus-gene-14.74-mRNA-1  | NA | NA       |              |                          | Ribose-phosphate diphosphokinase                                       |
| maker-2-augustus-gene-145.0-mRNA-1  | NA | Japonica | Os02g0443000 | OsR498G0407986600.01.T01 | DNA-directed RNA polymerase subunit beta"                              |
| maker-2-augustus-gene-147.0-mRNA-1  | NA | NA       |              |                          | Transposon protein, putative, CACTA, En/Spm sub-class                  |
| maker-2-augustus-gene-15.0-mRNA-1   | NA | NA       | Os02g0128200 | OsR498G0202887300.01.T05 | G-box-binding factor 1                                                 |
| maker-2-augustus-gene-15.11-mRNA-1  | NA | NA       | Os07g0212400 |                          | HGWP repeat containing protein-like                                    |
| maker-2-augustus-gene-15.16-mRNA-1  | NA | NA       | Os02g0129100 |                          |                                                                        |
| maker-2-augustus-gene-15.22-mRNA-1  | NA | Indica   | Os02g0128300 | OsR498G0202887600.01.T05 | Protein dimerizations                                                  |
| maker-2-augustus-gene-15.27-mRNA-1  | NA | NA       | Os02g0128800 | OsR498G0202888400.01.T03 | RING-type E3 ubiquitin transferase                                     |
| maker-2-augustus-gene-15.32-mRNA-1  | NA | Indica   | Os02g0129300 | OsR498G0202895000.01.T04 | Protein LOW PSII ACCUMULATION 3, chloroplastic                         |
| maker-2-augustus-gene-158.0-mRNA-1  | NA | NA       | Os02g0464500 | OsR498G0203752300.01.T01 |                                                                        |
| maker-2-augustus-gene-158.10-mRNA-1 | NA | Indica   | Os02g0464900 | OsR498G0203754200.01.T01 | Heat shock                                                             |
| maker-2-augustus-gene-158.2-mRNA-1  | NA | NA       | 0            | OsR498G0203749800.01.T03 | Carboxypeptidase                                                       |
| maker-2-augustus-gene-159.41-mRNA-1 | NA | Japonica | Os02g0465112 | OsR498G0816133900.01.T03 | Ubiquitin receptor RAD23                                               |
| maker-2-augustus-gene-159.43-mRNA-1 | NA | NA       | Os02g0465400 | OsR498G0203756600.01.T02 | 7-dehydrocholesterol reductase                                         |
| maker-2-augustus-gene-159.48-mRNA-1 | NA | NA       | Os02g0465500 | OsR498G0203757000.01.T01 | Exonuclease                                                            |
| maker-2-augustus-gene-159.53-mRNA-1 | NA | NA       | Os02g0465900 | OsR498G0203758400.01.T03 | Gamma-glutamylcyclotransferase                                         |
| maker-2-augustus-gene-159.61-mRNA-1 | NA | NA       | Os02g0467000 | OsR498G0203763000.01.T01 | Cinnamate 4-hydroxylase                                                |
| maker-2-augustus-gene-16.39-mRNA-1  | NA | NA       | Os02g0130600 | OsR498G0202900900.01.T03 | Transcription initiation factor TFIID subunit like                     |
| maker-2-augustus-gene-16.44-mRNA-1  | NA | NA       | Os02g0130700 | OsR498G0202901100.01.T01 |                                                                        |
| maker-2-augustus-gene-16.46-mRNA-1  | NA | NA       | 0            | OsR498G0202901300.01.T01 | Putative ubiquitin-conjugating enzyme E2-binding protein               |
| maker-2-augustus-gene-16.58-mRNA-1  | NA | NA       | Os02g0131300 | OsR498G0202902900.01.T01 | Mitochondrial ATP synthase                                             |
| maker-2-augustus-gene-16.63-mRNA-1  | NA | NA       | Os02g0130000 | OsR498G0202897600.01.T01 | SWIb domain-containing protein (Fragment)                              |
| maker-2-augustus-gene-16.65-mRNA-1  | NA | NA       | Os02g0130100 | OsR498G0202897800.01.T01 | Glutaminase                                                            |
| maker-2-augustus-gene-16.70-mRNA-1  | NA | NA       | Os02g0130200 | OsR498G0202898000.01.T01 | Putative polygalacturonase                                             |
| maker-2-augustus-gene-16.72-mRNA-1  | NA | NA       | Os02g0130300 | OsR498G0202898200.01.T03 | E3 ubiquitin-protein ligase BOI                                        |
| maker-2-augustus-gene-16.75-mRNA-1  | NA | NA       | 0            | OsR498G0202902800.01.T03 | Anthrnilate phosphoribosyltransferase                                  |
| maker-2-augustus-gene-16.80-mRNA-1  | NA | NA       | Os02g0131400 | OsR498G0202903600.01.T01 | Putative beta-D-glucan exohydrolase                                    |
| maker-2-augustus-gene-16.82-mRNA-1  | NA | NA       | 0            | OsR498G0202904200.01.T01 | Ras GTPase-activating protein-binding protein 2                        |
| maker-2-augustus-gene-160.32-mRNA-1 | NA | NA       | 0            | OsR498G0203764100.01.T01 | PMD domain-containing protein                                          |
| maker-2-augustus-gene-160.35-mRNA-1 | NA | NA       | Os02g0467600 | OsR498G0203764700.01.T01 | Cinnamate 4-hydroxylase                                                |
| maker-2-augustus-gene-160.37-mRNA-1 | NA | NA       | Os02g0467700 | OsR498G0203764900.01.T06 | Glycosyltransferase family protein 28                                  |
| maker-2-augustus-gene-160.40-mRNA-1 | NA | NA       | Os02g0468400 | OsR498G0203767300.01.T01 | START domain                                                           |

|                                     |    |          |               |              |                          |                                                                            |
|-------------------------------------|----|----------|---------------|--------------|--------------------------|----------------------------------------------------------------------------|
| maker-2-augustus-gene-160.43-mRNA-1 | NA | Indica   |               | Os02g0468200 | OsR498G0203767000.01.T02 | rRNA-processing protein PIN domain protein                                 |
| maker-2-augustus-gene-161.0-mRNA-1  | NA | Indica   |               | Os02g0469200 | OsR498G0203772900.01.T01 | YTH domain-containing protein                                              |
| maker-2-augustus-gene-161.10-mRNA-1 | NA | NA       |               | Os02g0469300 | OsR498G0203773700.01.T10 | ATP-binding region, ATPase-like domain-containing protein-like             |
| maker-2-augustus-gene-161.25-mRNA-1 | NA | NA       |               | Os02g0469600 | OsR498G0203775300.01.T01 | Cysteine proteinase Cathepsin F                                            |
| maker-2-augustus-gene-161.9-mRNA-1  | NA | NA       |               | Os02g0469300 | OsR498G0203773700.01.T09 | Protein MICRORCHIDIA 7                                                     |
| maker-2-augustus-gene-168.24-mRNA-1 | NA | NA       |               | 0            | OsR498G0203816400.01.T04 | Putative P-loop containing nucleoside triphosphate hydrolase, alpha/Beta h |
| maker-2-augustus-gene-17.0-mRNA-1   | NA | NA       |               | Os02g0132300 | OsR498G0202905900.01.T02 | E3 ubiquitin-protein ligase MARCH8                                         |
| maker-2-augustus-gene-17.11-mRNA-1  | NA | NA       |               | Os02g0131800 | OsR498G0202904800.01.T01 | Root-specific metal transporter                                            |
| maker-2-augustus-gene-17.16-mRNA-1  | NA | Japonica |               | Os02g0132100 | OsR498G0202905400.01.T04 | Pentatricopeptide repeat-containing protein                                |
| maker-2-augustus-gene-17.18-mRNA-1  | NA | NA       |               | Os02g0132200 | OsR498G0202905600.01.T01 | Putative membrane protein ycf78                                            |
| maker-2-augustus-gene-17.20-mRNA-1  | NA | NA       |               |              |                          | Pentatricopeptide repeat-containing protein mitochondrial                  |
| maker-2-augustus-gene-17.26-mRNA-1  | NA | NA       |               | 0            | OsR498G0202908800.01.T01 |                                                                            |
| maker-2-augustus-gene-17.28-mRNA-1  | NA | NA       |               | 0            | OsR498G0202909800.01.T02 | Cyclin-T1-4 like                                                           |
| maker-2-augustus-gene-17.34-mRNA-1  | NA | NA       |               | Os02g0133200 | OsR498G0202911000.01.T01 | Phosphatidylinositol/phosphatidylcholine transfer protein SFH10            |
| maker-2-augustus-gene-17.5-mRNA-1   | NA | Indica   |               | Os02g0133100 | OsR498G0202910700.01.T02 | Phosphatidylinositolphosphatidylcholine transfer protein sfh8              |
| maker-2-augustus-gene-172.39-mRNA-1 | NA | NA       |               | Os02g0487300 | OsR498G0203832700.01.T01 | WRC domain-containing protein                                              |
| maker-2-augustus-gene-173.0-mRNA-1  | NA | NA       |               | Os02g0489400 | OsR498G0203838500.01.T01 | 40S ribosomal protein S8                                                   |
| maker-2-augustus-gene-177.10-mRNA-1 | NA | NA       |               | Os02g0495400 |                          |                                                                            |
| maker-2-augustus-gene-178.0-mRNA-1  | NA | Indica   |               | Os02g0498300 | OsR498G0203864300.01.T02 | Probable magnesium transporter                                             |
| maker-2-augustus-gene-18.0-mRNA-1   | NA | NA       |               | Os02g0133800 | OsR498G0202912300.01.T01 | Proteasome endopeptidase complex                                           |
| maker-2-augustus-gene-18.16-mRNA-1  | NA | NA       |               | Os02g0133400 |                          | SMC hinge domain-containing protein                                        |
| maker-2-augustus-gene-18.2-mRNA-1   | NA | NA       |               | Os02g0133900 | OsR498G0202912500.01.T01 | Transmembrane protein 53-B                                                 |
| maker-2-augustus-gene-18.27-mRNA-1  | NA | NA       |               | Os02g0134300 | OsR498G0202914200.01.T01 | Transcription elongation factor 1 homolog                                  |
| maker-2-augustus-gene-18.30-mRNA-1  | NA | NA       |               | 0            | OsR498G0202915000.01.T01 | Outer membrane transport energization protein TonB                         |
| maker-2-augustus-gene-18.32-mRNA-1  | NA | NA       |               | Os02g0134700 | OsR498G0202915600.01.T03 |                                                                            |
| maker-2-augustus-gene-18.33-mRNA-1  | NA | NA       | Kinase        | Os02g0135200 | OsR498G0202916400.01.T05 | Mitogen-activated protein kinase                                           |
| maker-2-augustus-gene-18.5-mRNA-1   | NA | Japonica |               | Os02g0134000 | OsR498G0202912700.01.T01 | Bifunctional coenzyme A synthase                                           |
| maker-2-augustus-gene-18.8-mRNA-1   | NA | NA       |               | Os02g0134400 | OsR498G0202914700.01.T02 | L-aspartate oxidase                                                        |
| maker-2-augustus-gene-181.4-mRNA-1  | NA | NA       |               | Os02g0503400 | OsR498G0203881900.01.T01 | 60S ribosomal protein L35                                                  |
| maker-2-augustus-gene-182.32-mRNA-1 | NA | Japonica |               | Os02g0503700 | OsR498G0203882700.01.T01 | Isoflavone 2'-hydroxylase                                                  |
| maker-2-augustus-gene-182.35-mRNA-1 | NA | NA       |               | Os02g0503800 | OsR498G0203883100.01.T01 | Cytochrome P450 family 81 subfamily D polypeptide 8                        |
| maker-2-augustus-gene-182.36-mRNA-1 | NA | NA       |               | Os02g0503900 | OsR498G0203883100.01.T02 | Isoflavone 2'-hydroxylase                                                  |
| maker-2-augustus-gene-183.0-mRNA-1  | NA | NA       |               | Os02g0504500 | OsR498G0203886100.01.T01 | UBA domain-containing protein/PUB domain-containing protein                |
| maker-2-augustus-gene-183.11-mRNA-1 | NA | Indica   |               | Os02g0504800 | OsR498G0203887400.01.T01 | Acyl-[acyl-carrier-protein] desaturase                                     |
| maker-2-augustus-gene-183.13-mRNA-1 | NA | NA       |               | Os02g0504900 | OsR498G0203887600.01.T02 | F-box/kelch-repeat protein At1g67480                                       |
| maker-2-augustus-gene-183.6-mRNA-1  | NA | Japonica |               | Os02g0504700 | OsR498G0203887100.01.T01 | AvrRpt-cleavage domain-containing protein (Fragment)                       |
| maker-2-augustus-gene-183.9-mRNA-1  | NA | NA       |               | 0            | OsR498G0203891300.01.T01 |                                                                            |
| maker-2-augustus-gene-185.10-mRNA-1 | NA | NA       |               | 0            | OsR498G0203901200.01.T01 | Gamma carbonic anhydrase-like 2 mitochondrial                              |
| maker-2-augustus-gene-187.37-mRNA-1 | NA | NA       |               | 0            | OsR498G0203905600.01.T05 | SART-1 family protein DOT2                                                 |
| maker-2-augustus-gene-187.42-mRNA-1 | NA | Indica   |               | Os02g0511800 | OsR498G0203906400.01.T02 | NOP5NT domain-containing protein                                           |
| maker-2-augustus-gene-188.0-mRNA-1  | NA | NA       |               | Os02g0511900 |                          | DNA polymerase epsilon catalytic subunit A                                 |
| maker-2-augustus-gene-188.7-mRNA-1  | NA | NA       |               | 0            | OsR498G0203908300.01.T02 | Ribosomal pseudouridine synthase                                           |
| maker-2-augustus-gene-189.10-mRNA-1 | NA | Japonica |               | Os02g0513800 | OsR498G0203915600.01.T06 | Ubiquitinyl hydrolase 1                                                    |
| maker-2-augustus-gene-189.16-mRNA-1 | NA | NA       |               | Os03g0237200 |                          | Protein SHOOT GRAVITROPISM 5                                               |
| maker-2-augustus-gene-189.17-mRNA-1 | NA | NA       |               | Os08g0381000 | OsR498G0408344700.01.T01 | Cell wall protein-like                                                     |
| maker-2-augustus-gene-189.3-mRNA-1  | NA | NA       |               | 0            | OsR498G0203917700.01.T01 | Glycerophosphodiester phosphodiesterase                                    |
| maker-2-augustus-gene-189.8-mRNA-1  | NA | NA       |               | Os02g0513100 | OsR498G0203912800.01.T01 | Bidirectional sugar transporter SWEET                                      |
| maker-2-augustus-gene-19.0-mRNA-1   | NA | NA       |               | Os02g0135500 | OsR498G0202917300.01.T01 | Protein O-linked-mannose beta-1,4-N-acetylglucosaminyltransferase 2-like   |
| maker-2-augustus-gene-19.12-mRNA-1  | NA | Indica   | Kinase-LRR-TM | Os02g0136900 | OsR498G0202924100.01.T01 | Serine/threonine protein kinase                                            |
| maker-2-augustus-gene-19.16-mRNA-1  | NA | NA       | Kinase        | 0            | OsR498G0202916600.01.T01 | Putative cell cycle regulatory protein kinase Wee1 (Fragment)              |
| maker-2-augustus-gene-19.2-mRNA-1   | NA | NA       |               | Os02g0135700 | OsR498G0202918500.01.T01 | myb-binding protein 1A-like protein isoform X1                             |
| maker-2-augustus-gene-19.20-mRNA-1  | NA | NA       |               | Os02g0135600 | OsR498G0202918200.01.T01 | Recoverin                                                                  |
| maker-2-augustus-gene-19.24-mRNA-1  | NA | NA       |               | 0            | OsR498G0202920000.01.T01 | PB1 domain-containing protein                                              |
| maker-2-augustus-gene-19.27-mRNA-1  | NA | NA       |               | Os02g0136400 |                          |                                                                            |
| maker-2-augustus-gene-19.7-mRNA-1   | NA | NA       |               | Os02g0135900 | OsR498G0202919700.01.T02 | Protein PTST, chloroplastic                                                |
| maker-2-augustus-gene-190.0-mRNA-1  | NA | NA       |               | Os02g0514766 | OsR498G0203918700.01.T01 | Dihydrolypoyllysine-residue succinyltransferase                            |
| maker-2-augustus-gene-190.10-mRNA-1 | NA | NA       |               | Os02g0515200 | OsR498G0203921600.01.T01 | BAR domain-containing protein                                              |
| maker-2-augustus-gene-190.16-mRNA-1 | NA | NA       |               | Os02g0515600 | OsR498G0203923000.01.T01 | GSH-induced LITAF domain-containing protein                                |
| maker-2-augustus-gene-190.3-mRNA-1  | NA | NA       | LRR-TM        |              |                          |                                                                            |
| maker-2-augustus-gene-190.8-mRNA-1  | NA | Indica   |               | Os02g0514800 | OsR498G0203919000.01.T01 | DNA-directed RNA polymerase III subunit RPC4                               |
| maker-2-augustus-gene-192.41-mRNA-1 | NA | NA       |               | Os05g0471800 |                          | Far-red impaired response protein-like                                     |

|                                     |    |          |           |              |                          |                                                                          |
|-------------------------------------|----|----------|-----------|--------------|--------------------------|--------------------------------------------------------------------------|
| maker-2-augustus-gene-193.10-mRNA-1 | NA | NA       |           | Os02g0520100 | OsR498G0203951000.01.T02 | Nudix hydrolase 13 mitochondrial                                         |
| maker-2-augustus-gene-193.3-mRNA-1  | NA | Indica   |           | Os04g0661300 | OsR498G0203946800.01.T01 | Myosin-H heavy chain isoform 1                                           |
| maker-2-augustus-gene-194.1-mRNA-1  | NA | NA       |           |              |                          | Putative AC transposase                                                  |
| maker-2-augustus-gene-194.13-mRNA-1 | NA | Indica   |           | Os04g0398600 | OsR498G0203953400.01.T01 | Exostosis domain-containing protein                                      |
| maker-2-augustus-gene-194.15-mRNA-1 | NA | NA       |           | Os02g0520800 | OsR498G0203954000.01.T01 | Cytochrome b-c1 complex subunit Rieske, mitochondrial                    |
| maker-2-augustus-gene-194.19-mRNA-1 | NA | NA       |           | Os02g0521300 | OsR498G0203954800.01.T04 | Calcium-dependent phospholipid-binding Copine family protein (Fragment)  |
| maker-2-augustus-gene-194.3-mRNA-1  | NA | NA       |           | 0            | OsR498G0203955500.01.T03 | Ubiquitinyl hydrolase 1                                                  |
| maker-2-augustus-gene-195.27-mRNA-1 | NA | NA       |           | 0            | OsR498G0203959100.01.T01 | Ubiquitinyl hydrolase 1                                                  |
| maker-2-augustus-gene-195.33-mRNA-1 | NA | Indica   |           | Os02g0522700 | OsR498G0203959100.01.T05 | Ubiquitinyl hydrolase 1                                                  |
| maker-2-augustus-gene-195.35-mRNA-1 | NA | NA       |           |              |                          | Ubiquitinyl hydrolase 1                                                  |
| maker-2-augustus-gene-196.11-mRNA-1 | NA | NA       |           | Os02g0526400 | OsR498G0203973700.01.T01 | Chaperone protein ClpD chloroplastic                                     |
| maker-2-augustus-gene-196.16-mRNA-1 | NA | NA       |           |              |                          |                                                                          |
| maker-2-augustus-gene-196.18-mRNA-1 | NA | Indica   |           | Os02g0526000 | OsR498G0203972200.01.T01 | Heparan-alpha-glucosaminide N-acetyltransferase-like isoform X1          |
| maker-2-augustus-gene-196.5-mRNA-1  | NA | NA       |           | Os02g0525900 | OsR498G0203971900.01.T01 | Acetyl-coenzyme A synthetase                                             |
| maker-2-augustus-gene-197.0-mRNA-1  | NA | NA       |           | 0            | OsR498G0203975900.01.T02 | SWI/SNF-related matrix-associated actin-dependent regulator of chromatin |
| maker-2-augustus-gene-197.10-mRNA-1 | NA | NA       |           | Os02g0527200 | OsR498G0203976400.01.T02 | Histone deacetylase HDT1-like                                            |
| maker-2-augustus-gene-197.13-mRNA-1 | NA | NA       |           | Os02g0527300 | OsR498G0203977800.01.T02 | Heat stress transcription factor A-3                                     |
| maker-2-augustus-gene-197.16-mRNA-1 | NA | NA       | Kinase-TM | 0            | OsR498G0203979600.01.T05 | Mitogen activated kinase kinase kinase CTR1                              |
| maker-2-augustus-gene-197.7-mRNA-1  | NA | Indica   |           | Os04g0405100 | OsR498G0203974000.01.T03 | SAM domain-containing protein                                            |
| maker-2-augustus-gene-198.40-mRNA-1 | NA | NA       |           |              |                          | ATP-dependent DNA helicase                                               |
| maker-2-augustus-gene-198.42-mRNA-1 | NA | Japonica |           | Os02g0528500 | OsR498G0102641700.01.T01 | Replication protein-like                                                 |
| maker-2-augustus-gene-198.44-mRNA-1 | NA | Japonica |           | Os02g0528000 | OsR498G0203981000.01.T01 | RING-type domain-containing protein                                      |
| maker-2-augustus-gene-198.46-mRNA-1 | NA | NA       |           | Os02g0528100 | OsR498G0203981400.01.T01 | RAB6-interacting golgin                                                  |
| maker-2-augustus-gene-198.48-mRNA-1 | NA | NA       |           | Os02g0528200 | OsR498G0203981600.01.T02 | 1,4-alpha-glucan-branching enzyme 2, chloroplastic/amyloplastic          |
| maker-2-augustus-gene-198.53-mRNA-1 | NA | NA       |           | 0            | OsR498G0203983400.01.T04 | ABC transporter domain-containing protein                                |
| maker-2-augustus-gene-198.63-mRNA-1 | NA | NA       |           | Os11g0100100 | OsR498G1220782800.01.T04 | Autophagy-related protein 8D                                             |
| maker-2-augustus-gene-199.0-mRNA-1  | NA | NA       |           | Os02g0529400 | OsR498G0203985100.01.T01 | Alkaline/neutral invertase                                               |
| maker-2-augustus-gene-199.11-mRNA-1 | NA | NA       |           | Os02g0530100 | OsR498G0203987400.01.T02 | Heavy metal-associated domain, HMA                                       |
| maker-2-augustus-gene-199.19-mRNA-1 | NA | NA       |           | Os02g0530600 | OsR498G0203990200.01.T01 | Poly [ADP-ribose] polymerase                                             |
| maker-2-augustus-gene-199.5-mRNA-1  | NA | NA       |           | Os02g0529500 | OsR498G0203985500.01.T01 | SNAPous protein SNAP33                                                   |
| maker-2-augustus-gene-199.7-mRNA-1  | NA | Japonica |           | Os02g0529700 | OsR498G0100309500.01.T03 | Acidic ribosomal protein P2a-2                                           |
| maker-2-augustus-gene-199.9-mRNA-1  | NA | NA       |           | Os02g0529800 | OsR498G0203986400.01.T03 | Cytochrome P450 family protein, expressed                                |
| maker-2-augustus-gene-20.31-mRNA-1  | NA | Indica   |           | Os02g0137000 | OsR498G0202924500.01.T03 | Transducin family protein / WD-40 repeat family protein                  |
| maker-2-augustus-gene-20.38-mRNA-1  | NA | NA       |           | Os02g0137100 | OsR498G0202925100.01.T02 | Transducin family protein / WD-40 repeat family protein                  |
| maker-2-augustus-gene-20.42-mRNA-1  | NA | Indica   |           | Os02g0137400 | OsR498G0202925700.01.T01 | Splicing factor 3B subunit 3                                             |
| maker-2-augustus-gene-20.44-mRNA-1  | NA | NA       |           | 0            | OsR498G0202926300.01.T02 | Histone acetyltransferase                                                |
| maker-2-augustus-gene-20.53-mRNA-1  | NA | Indica   |           | Os06g0704700 | OsR498G0202926900.01.T03 | Divinyl chlorophyllide a 8-vinyl-reductase, chloroplastic                |
| maker-2-augustus-gene-20.59-mRNA-1  | NA | NA       |           | Os02g0137800 | OsR498G0202927100.01.T01 | Guanine nucleotide-binding protein subunit gamma 2                       |
| maker-2-augustus-gene-20.62-mRNA-1  | NA | NA       |           | Os02g0138200 | OsR498G0202929500.01.T01 | RRM domain-containing protein                                            |
| maker-2-augustus-gene-20.65-mRNA-1  | NA | NA       |           |              |                          |                                                                          |
| maker-2-augustus-gene-20.67-mRNA-1  | NA | Indica   |           | Os02g0137200 | OsR498G0202925400.01.T03 | Large subunit ribosomal protein L3                                       |
| maker-2-augustus-gene-200.37-mRNA-1 | NA | NA       |           | Os02g0531200 | OsR498G0203991700.01.T01 | Sodium/bile acid cotransporter 7                                         |
| maker-2-augustus-gene-200.42-mRNA-1 | NA | NA       |           | Os02g0532300 | OsR498G0203995700.01.T01 | AB hydrolase-1 domain-containing protein                                 |
| maker-2-augustus-gene-200.44-mRNA-1 | NA | NA       |           | Os02g0532900 | OsR498G0203998100.01.T01 | Glucan endo-13-beta-glucosidase 14                                       |
| maker-2-augustus-gene-200.46-mRNA-1 | NA | Indica   |           | Os02g0530900 | OsR498G0203991600.01.T01 |                                                                          |
| maker-2-augustus-gene-200.49-mRNA-1 | NA | NA       |           | Os02g0531600 | OsR498G0203993200.01.T01 | Centroradialis                                                           |
| maker-2-augustus-gene-201.0-mRNA-1  | NA | Japonica |           | Os02g0533200 | OsR498G0203998700.01.T02 | Heme-binding-like protein chloroplastic                                  |
| maker-2-augustus-gene-201.12-mRNA-1 | NA | NA       |           | Os02g0534400 | OsR498G0204003500.01.T05 | Beta-fructofuranosidase, insoluble isoenzyme 1                           |
| maker-2-augustus-gene-201.18-mRNA-1 | NA | NA       |           | 0            | OsR498G0204006100.01.T01 |                                                                          |
| maker-2-augustus-gene-201.20-mRNA-1 | NA | NA       |           | 0            | OsR498G0203998400.01.T01 | Iron-sulfur cluster biosynthesis family protein isoform 1                |
| maker-2-augustus-gene-201.28-mRNA-1 | NA | NA       |           | Os02g0533800 |                          | ATPase inhibitor                                                         |
| maker-2-augustus-gene-201.30-mRNA-1 | NA | NA       |           | Os02g0534800 | OsR498G0204005600.01.T01 | Ribosomal protein S14                                                    |
| maker-2-augustus-gene-201.33-mRNA-1 | NA | NA       |           | Os02g0535000 | OsR498G0204005800.01.T01 | protein ORANGE-LIKE, chloroplastic                                       |
| maker-2-augustus-gene-201.4-mRNA-1  | NA | NA       |           | Os02g0533300 | OsR498G0203998900.01.T01 | Bifunctional monodehydroascorbate reductase and carbonic anhydrase nec   |
| maker-2-augustus-gene-201.7-mRNA-1  | NA | NA       |           | Os02g0533900 | OsR498G0204000100.01.T01 | Carbon-nitrogen hydrolase                                                |
| maker-2-augustus-gene-202.30-mRNA-1 | NA | NA       |           | 0            | OsR498G0204007300.01.T01 | Mitochondrial fission protein ELM1                                       |
| maker-2-augustus-gene-202.35-mRNA-1 | NA | NA       |           | Os02g0536100 | OsR498G0204009300.01.T02 | Peptidyl-prolyl cis-trans isomerase G                                    |
| maker-2-augustus-gene-202.37-mRNA-1 | NA | Indica   |           | Os02g0537200 | OsR498G0204009900.01.T04 | FBD domain-containing protein                                            |
| maker-2-augustus-gene-202.40-mRNA-1 | NA | NA       |           | 0            | OsR498G0204006800.01.T04 | Integrin beta-1-binding protein 2                                        |
| maker-2-augustus-gene-202.43-mRNA-1 | NA | Indica   |           | Os02g0537200 | OsR498G0204013200.01.T01 | FBD domain-containing protein                                            |
| maker-2-augustus-gene-203.0-mRNA-1  | NA | NA       |           | 0            | OsR498G0204016900.01.T01 | Chaperone protein ClpB1-like                                             |

|                                     |    |          |              |              |                          |                                                                             |
|-------------------------------------|----|----------|--------------|--------------|--------------------------|-----------------------------------------------------------------------------|
| maker-2-augustus-gene-203.11-mRNA-1 | NA | NA       |              | Os02g0537200 | OsR498G0204016000.01.T01 | FBD domain-containing protein                                               |
| maker-2-augustus-gene-203.13-mRNA-1 | NA | NA       |              | Os02g0537500 | OsR498G0204017200.01.T01 | Transcription factor E2FA like                                              |
| maker-2-augustus-gene-203.8-mRNA-1  | NA | Japonica |              | Os02g0537800 | OsR498G0204018500.01.T01 | Butenolide signaling repressing protein-like                                |
| maker-2-augustus-gene-204.0-mRNA-1  | NA | NA       |              |              |                          |                                                                             |
| maker-2-augustus-gene-204.12-mRNA-1 | NA | NA       |              | Os02g0537900 | OsR498G0204019400.01.T01 | H(+)-exporting diphosphatase                                                |
| maker-2-augustus-gene-204.18-mRNA-1 | NA | NA       |              |              |                          | Threonyl-tRNA synthetase                                                    |
| maker-2-augustus-gene-204.22-mRNA-1 | NA | NA       |              | Os02g0538900 | OsR498G0204022400.01.T01 | Basic leucine zipper 6                                                      |
| maker-2-augustus-gene-204.4-mRNA-1  | NA | NA       |              | Os02g0539100 | OsR498G0204022900.01.T01 | Digalactosyldiacylglycerol synthase                                         |
| maker-2-augustus-gene-204.7-mRNA-1  | NA | NA       |              | 0            | OsR498G0204026100.01.T02 | Myb-like domain-containing protein (Fragment)                               |
| maker-2-augustus-gene-205.28-mRNA-1 | NA | Indica   |              | Os02g0541300 | OsR498G0204036700.01.T01 | Pyridoxal phosphate-dependent decarboxylase                                 |
| maker-2-augustus-gene-205.32-mRNA-1 | NA | NA       |              | Os02g0539900 |                          | Protein phosphatase type 2A regulator/ signal transducer                    |
| maker-2-augustus-gene-206.0-mRNA-1  | NA | Japonica |              | Os02g0541900 | OsR498G0204038300.01.T01 | LORELEI-LIKE-GPI-ANCHORED PROTEIN 1                                         |
| maker-2-augustus-gene-206.11-mRNA-1 | NA | Indica   |              | Os02g0543000 | OsR498G0204042000.01.T01 | Absciscic stress ripening                                                   |
| maker-2-augustus-gene-206.13-mRNA-1 | NA | Japonica |              | Os02g0543100 | OsR498G0204042600.01.T01 | Sphingomyelin synthetase family protein isoform 1                           |
| maker-2-augustus-gene-206.2-mRNA-1  | NA | NA       |              | Os02g0542500 | OsR498G0204040300.01.T01 | AAA ATPase containing von Willebrand factor type A (VWA) domain-like pro    |
| maker-2-augustus-gene-206.4-mRNA-1  | NA | NA       |              | Os02g0543400 | OsR498G0204043700.01.T06 | WD repeat domain-containing protein 83                                      |
| maker-2-augustus-gene-206.6-mRNA-1  | NA | NA       |              | 0            | OsR498G0204038000.01.T02 | Cytochrome b-c1 complex subunit 6                                           |
| maker-2-augustus-gene-206.7-mRNA-1  | NA | NA       |              | Os02g0542200 |                          |                                                                             |
| maker-2-augustus-gene-206.9-mRNA-1  | NA | NA       |              | Os02g0542700 | OsR498G0204040800.01.T01 | Skin secretory protein xP2-like                                             |
| maker-2-augustus-gene-209.0-mRNA-1  | NA | Japonica |              | Os02g0545700 | OsR498G0204070700.01.T01 |                                                                             |
| maker-2-augustus-gene-209.3-mRNA-1  | NA | Japonica |              | Os02g0547300 | OsR498G0611818300.01.T01 | PLAT domain-containing protein 3                                            |
| maker-2-augustus-gene-209.5-mRNA-1  | NA | NA       |              | Os02g0546600 | OsR498G0204073600.01.T01 | Ethylene-responsive transcription factor                                    |
| maker-2-augustus-gene-209.7-mRNA-1  | NA | Japonica |              | Os02g0546800 | OsR498G0204073600.01.T01 | Wound-responsive AP2 like factor 1                                          |
| maker-2-augustus-gene-210.32-mRNA-1 | NA | NA       |              | 0            | OsR498G0204078100.01.T01 | BHLH domain-containing protein                                              |
| maker-2-augustus-gene-212.10-mRNA-1 | NA | NA       |              | Os02g0552100 | OsR498G0204096900.01.T03 | Pentatricopeptide repeat-containing protein                                 |
| maker-2-augustus-gene-218.0-mRNA-1  | NA | Indica   |              | Os04g0444900 | OsR498G0204130100.01.T01 | PHD finger protein Alfin1                                                   |
| maker-2-augustus-gene-218.15-mRNA-1 | NA | NA       |              | Os02g0564000 | OsR498G0204130000.01.T03 | Glutathione S-transferase                                                   |
| maker-2-augustus-gene-218.4-mRNA-1  | NA | Indica   |              | Os01g0886600 | OsR498G0204130500.01.T01 | AAA+ ATPase domain                                                          |
| maker-2-augustus-gene-22.30-mRNA-1  | NA | NA       |              | Os02g0141000 | OsR498G0202940900.01.T03 | GGACT domain-containing protein (Fragment)                                  |
| maker-2-augustus-gene-22.32-mRNA-1  | NA | NA       |              | Os02g0140400 | OsR498G0202938800.01.T03 | Camelliol C synthase                                                        |
| maker-2-augustus-gene-22.38-mRNA-1  | NA | NA       |              | 0            | OsR498G0202941400.01.T03 | Auxin response factor                                                       |
| maker-2-augustus-gene-221.6-mRNA-1  | NA | NA       |              | Os02g0570500 | OsR498G0204148100.01.T01 | Ent-isokaurene C2-hydroxylase                                               |
| maker-2-augustus-gene-222.26-mRNA-1 | NA | NA       |              | 0            | OsR498G0713832800.01.T01 |                                                                             |
| maker-2-augustus-gene-222.28-mRNA-1 | NA | NA       |              | Os02g0571100 | OsR498G0204150700.01.T01 | Ent-neo-cis-trans-clerodienyl diphosphate synthase                          |
| maker-2-augustus-gene-222.30-mRNA-1 | NA | NA       |              | Os02g0570700 | OsR498G0204149200.01.T01 | Ent-cassadiene hydroxylase                                                  |
| maker-2-augustus-gene-224.40-mRNA-1 | NA | NA       |              | Os02g0574100 | OsR498G0204161900.01.T01 | Sugar transport protein 5                                                   |
| maker-2-augustus-gene-224.41-mRNA-1 | NA | NA       |              | Os02g0574100 | OsR498G0204162100.01.T01 | Sugar transport protein 5                                                   |
| maker-2-augustus-gene-232.3-mRNA-1  | NA | Japonica |              | Os02g0590000 | OsR498G0204209400.01.T01 | Lecithin-cholesterol acyltransferase-like protein 1                         |
| maker-2-augustus-gene-232.5-mRNA-1  | NA | Japonica |              | Os02g0590400 | OsR498G0204207000.01.T01 | Lecithin-cholesterol acyltransferase-like 1                                 |
| maker-2-augustus-gene-233.0-mRNA-1  | NA | Indica   | CC-Kinase-TM | Os02g0591900 | OsR498G0204217300.01.T05 | Serine/threonine protein kinase                                             |
| maker-2-augustus-gene-233.12-mRNA-1 | NA | NA       |              | Os02g0593500 | OsR498G0204223300.01.T01 | Phosphate transporter                                                       |
| maker-2-augustus-gene-233.24-mRNA-1 | NA | NA       |              | Os02g0591800 | OsR498G0204216800.01.T01 | Brix domain-containing protein 2                                            |
| maker-2-augustus-gene-233.28-mRNA-1 | NA | Indica   |              | Os02g0592000 | OsR498G0204218000.01.T01 | 2-oxoglutarate-dependent dioxygenase DAO                                    |
| maker-2-augustus-gene-233.31-mRNA-1 | NA | NA       |              | Os02g0592200 | OsR498G0204218200.01.T01 | Calcineurin-like metallo-phosphoesterase superfamily protein isoform 1      |
| maker-2-augustus-gene-233.35-mRNA-1 | NA | NA       |              | Os02g0592300 | OsR498G0204218400.01.T01 | Mismatch repair endonuclease PMS2                                           |
| maker-2-augustus-gene-233.39-mRNA-1 | NA | NA       |              | Os02g0592500 | OsR498G0204219200.01.T02 | Putative folate receptor                                                    |
| maker-2-augustus-gene-233.41-mRNA-1 | NA | NA       |              | Os02g0592800 | OsR498G0204219600.01.T01 | FLZ-type domain-containing protein                                          |
| maker-2-augustus-gene-233.43-mRNA-1 | NA | NA       |              | 0            | OsR498G0407524800.01.T01 | Amine oxidase                                                               |
| maker-2-augustus-gene-233.49-mRNA-1 | NA | NA       |              | Os02g0593400 | OsR498G0204223600.01.T01 | Transcription termination factor 4                                          |
| maker-2-augustus-gene-233.6-mRNA-1  | NA | NA       |              | Os02g0592400 | OsR498G0204218900.01.T01 | HIG1 domain-containing protein (Fragment)                                   |
| maker-2-augustus-gene-234.0-mRNA-1  | NA | NA       | LRR-TM       | Os02g0593600 | OsR498G0204224100.01.T01 | Plant intracellular Ras-group-related LRR protein 2                         |
| maker-2-augustus-gene-234.15-mRNA-1 | NA | NA       |              | Os02g0593700 | OsR498G0204224400.01.T07 | Putative PB1 domain, Zinc finger, ZZ-type, Next to BRCA1, central domain-co |
| maker-2-augustus-gene-234.5-mRNA-1  | NA | NA       |              | Os02g0593900 | OsR498G0204224700.01.T03 | Ribosomal RNA-processing protein 8                                          |
| maker-2-augustus-gene-234.7-mRNA-1  | NA | NA       | Kinase-TM    | Os02g0594100 | OsR498G0204225300.01.T02 | serine/threonine-protein kinase STY13                                       |
| maker-2-augustus-gene-235.41-mRNA-1 | NA | NA       |              | 0            | OsR498G0204238100.01.T01 | BTB/POZ and TAZ domain-containing protein 2                                 |
| maker-2-augustus-gene-235.43-mRNA-1 | NA | NA       |              | Os02g0596900 | OsR498G0204238700.01.T01 | Actin-related protein 3 isoform A                                           |
| maker-2-augustus-gene-236.0-mRNA-1  | NA | Japonica |              | Os02g0597700 | OsR498G0204241500.01.T01 | BCL-2 binding anthanogene-1                                                 |
| maker-2-augustus-gene-236.13-mRNA-1 | NA | NA       |              | Os02g0598500 | OsR498G0204245100.01.T01 | PPM-type phosphatase domain-containing protein (Fragment)                   |
| maker-2-augustus-gene-236.17-mRNA-1 | NA | Indica   |              | Os04g0483500 | OsR498G0204242200.01.T01 | B-keto acyl reductase                                                       |
| maker-2-augustus-gene-236.19-mRNA-1 | NA | NA       |              | Os02g0598200 | OsR498G0204243000.01.T02 | TF-B3 domain-containing protein                                             |
| maker-2-augustus-gene-236.2-mRNA-1  | NA | NA       |              | Os02g0597800 | OsR498G0204241900.01.T05 | Steroid nuclear receptor ligand-binding                                     |



|                                      |    |          |               |              |                          |                                                                        |
|--------------------------------------|----|----------|---------------|--------------|--------------------------|------------------------------------------------------------------------|
| maker-2-augustus-gene-236.8-mRNA-1   | NA | NA       |               | 0            | OsR498G0204243500.01.T01 | Intracellular protein transport protein USO1                           |
| maker-2-augustus-gene-237.122-mRNA-1 | NA | NA       |               | Os02g0600100 | OsR498G0204247700.01.T01 | Proteasome component (PCI) domain                                      |
| maker-2-augustus-gene-237.126-mRNA-1 | NA | NA       |               | Os02g0600400 | OsR498G0204248100.01.T05 | Glucose-6-phosphate dehydrogenase (NADP(+))                            |
| maker-2-augustus-gene-237.129-mRNA-1 | NA | NA       |               | Os02g0601300 | OsR498G0204250900.01.T01 | Glyceraldehyde-3-phosphate dehydrogenase 3, cytosolic                  |
| maker-2-augustus-gene-237.139-mRNA-1 | NA | NA       |               | Os02g0600200 | OsR498G0204248000.01.T03 | Ribosome-recycling factor, mitochondrial (Fragment)                    |
| maker-2-augustus-gene-237.142-mRNA-1 | NA | NA       |               | 0            | OsR498G0204249600.01.T01 | Cytosolic Fe-S cluster assembly factor NBP35                           |
| maker-2-augustus-gene-237.147-mRNA-1 | NA | Indica   |               | Os02g0601500 | OsR498G0204251600.01.T01 | Premnaspirodiene oxygenase                                             |
| maker-2-augustus-gene-237.46-mRNA-1  | NA | Indica   |               | Os02g0598400 | OsR498G0204244900.01.T01 | Telomere length regulation protein TEL                                 |
| maker-2-augustus-gene-237.49-mRNA-1  | NA | NA       |               |              |                          | Protein-serine/threonine phosphatase                                   |
| maker-2-augustus-gene-237.51-mRNA-1  | NA | Indica   |               | Os02g0598500 | OsR498G0204246300.01.T03 | PPM-type phosphatase domain-containing protein                         |
| maker-2-augustus-gene-238.40-mRNA-1  | NA | NA       | Kinase        | Os02g0602100 | OsR498G0204253300.01.T07 | Cyclin-dependent kinase G-1                                            |
| maker-2-augustus-gene-238.49-mRNA-1  | NA | NA       |               | Os02g0602800 | OsR498G0204254300.01.T05 | Vesicle transport protein GOT1                                         |
| maker-2-augustus-gene-238.56-mRNA-1  | NA | Indica   |               | Os02g0601800 | OsR498G0204252400.01.T05 | Transcription factor GTE9                                              |
| maker-2-augustus-gene-24.32-mRNA-1   | NA | NA       |               | Os02g0143100 | OsR498G0202953100.01.T05 | Sucrose-phosphate phosphatase                                          |
| maker-2-augustus-gene-24.37-mRNA-1   | NA | NA       |               | Os02g0143200 | OsR498G0202953500.01.T02 | ARM repeat superfamily protein                                         |
| maker-2-augustus-gene-24.41-mRNA-1   | NA | NA       |               | Os08g0487300 | OsR498G0102102900.01.T01 | Transposon protein, putative, Mutator sub-class                        |
| maker-2-augustus-gene-244.34-mRNA-1  | NA | NA       |               | Os02g0614100 | OsR498G0204296700.01.T01 | TPT domain-containing protein (Fragment)                               |
| maker-2-augustus-gene-244.54-mRNA-1  | NA | NA       |               | Os02g0614200 | OsR498G0204297200.01.T01 | Lysine-specific demethylase 2A-like                                    |
| maker-2-augustus-gene-245.12-mRNA-1  | NA | NA       | Kinase-LRR-TM |              |                          | Protein kinase domain-containing protein (Fragment)                    |
| maker-2-augustus-gene-245.14-mRNA-1  | NA | NA       |               | 0            | OsR498G0204303700.01.T05 |                                                                        |
| maker-2-augustus-gene-245.3-mRNA-1   | NA | NA       | Kinase-LRR-TM |              |                          | Protein kinase domain-containing protein (Fragment)                    |
| maker-2-augustus-gene-245.8-mRNA-1   | NA | Indica   | Kinase-LRR-TM | Os02g0615500 | OsR498G0204301900.01.T02 | LRR receptor-like serine/threonine-protein kinase EFR                  |
| maker-2-augustus-gene-247.0-mRNA-1   | NA | NA       |               | Os03g0184000 | OsR498G0305342900.01.T06 | 15-cis-phytoene desaturase, chloroplastic/chromoplastic                |
| maker-2-augustus-gene-247.5-mRNA-1   | NA | Indica   | LRR-TM        | Os02g0615800 | OsR498G0204310500.01.T04 | LRR receptor-like serine/threonine-protein kinase EFR                  |
| maker-2-augustus-gene-247.8-mRNA-1   | NA | Indica   | Kinase-TM     | Os02g0615500 | OsR498G0204301900.01.T02 | Putative LRR receptor-like serine/threonine-protein kinase             |
| maker-2-augustus-gene-248.0-mRNA-1   | NA | Indica   | LRR-TM        | Os02g0615300 | OsR498G0204314300.01.T03 | Putative receptor like protein 12                                      |
| maker-2-augustus-gene-249.0-mRNA-1   | NA | Indica   | Kinase-LRR-TM | Os02g0615300 | OsR498G0204315700.01.T02 | LRR receptor-like serine/threonine-protein kinase EFR                  |
| maker-2-augustus-gene-252.34-mRNA-1  | NA | NA       |               | 0            | OsR498G0204322800.01.T01 | Phosphatidylinositol N-acetylglucosaminyltransferase subunit P-related |
| maker-2-augustus-gene-252.36-mRNA-1  | NA | NA       |               | Os02g0617200 | OsR498G0204323600.01.T04 |                                                                        |
| maker-2-augustus-gene-252.40-mRNA-1  | NA | NA       |               | 0            | OsR498G0204324000.01.T02 | CLIP-associated protein-like                                           |
| maker-2-augustus-gene-253.0-mRNA-1   | NA | NA       |               | Os02g0617400 | OsR498G0204325500.01.T01 | Anther-specific proline-rich protein APG                               |
| maker-2-augustus-gene-253.12-mRNA-1  | NA | NA       |               | Os02g0618100 | OsR498G0204327500.01.T01 | Glutaredoxin                                                           |
| maker-2-augustus-gene-253.18-mRNA-1  | NA | NA       |               | Os02g0618700 | OsR498G0204329700.01.T01 | Putative lung seven transmembrane receptor 1                           |
| maker-2-augustus-gene-253.2-mRNA-1   | NA | NA       |               | 0            | OsR498G0204322800.01.T01 | DEXH-box ATP-dependent RNA helicase DEXH17                             |
| maker-2-augustus-gene-253.20-mRNA-1  | NA | NA       |               | 0            | OsR498G0204326000.01.T02 | Serine/threonine-protein phosphatase 2A 55 kDa regulatory subunit B    |
| maker-2-augustus-gene-253.25-mRNA-1  | NA | NA       |               | 0            | OsR498G0204326200.01.T02 | Polynucleotide phosphorylase 1                                         |
| maker-2-augustus-gene-253.28-mRNA-1  | NA | NA       |               | Os02g0618400 | OsR498G0204328800.01.T01 | Transcription factor MYB48                                             |
| maker-2-augustus-gene-254.5-mRNA-1   | NA | NA       |               |              |                          | Putative SET-domain containing protein family                          |
| maker-2-augustus-gene-255.40-mRNA-1  | NA | NA       |               | Os02g0622100 | OsR498G0204338900.01.T01 | Serine/threonine protein kinase                                        |
| maker-2-augustus-gene-255.46-mRNA-1  | NA | NA       |               | 0            | OsR498G0204339500.01.T05 | GLTP domain-containing protein (Fragment)                              |
| maker-2-augustus-gene-255.52-mRNA-1  | NA | NA       |               | Os11g0307600 | OsR498G1119899800.01.T01 | Protein kinase domain-containing protein                               |
| maker-2-augustus-gene-255.57-mRNA-1  | NA | Indica   |               | Os04g0515900 | OsR498G0204341900.01.T01 | NAC transcription factor                                               |
| maker-2-augustus-gene-255.66-mRNA-1  | NA | Indica   |               | Os04g0515300 | OsR498G0204339400.01.T02 | 60S ribosomal protein like (Fragment)                                  |
| maker-2-augustus-gene-255.75-mRNA-1  | NA | NA       |               | Os04g0354200 |                          | Transposon protein, putative, unclassified                             |
| maker-2-augustus-gene-256.9-mRNA-1   | NA | NA       |               | Os02g0623400 | OsR498G0204342200.01.T05 | ALOG domain transcriptional regulator family protein 4-2B              |
| maker-2-augustus-gene-259.50-mRNA-1  | NA | NA       |               | Os02g0629200 | OsR498G0204364100.01.T01 | PIP aquaporin                                                          |
| maker-2-augustus-gene-259.56-mRNA-1  | NA | Indica   |               | Os04g0522500 | OsR498G0204367200.01.T01 | Gibberellin 2-beta-dioxygenase 8                                       |
| maker-2-augustus-gene-26.67-mRNA-1   | NA | NA       |               | 0            | OsR498G0202966500.01.T04 | Dolichol kinase                                                        |
| maker-2-augustus-gene-26.74-mRNA-1   | NA | Japonica |               | Os02g0147300 | OsR498G0202968200.01.T02 | TOG domain-containing protein                                          |
| maker-2-augustus-gene-260.0-mRNA-1   | NA | NA       |               | Os02g0631000 | OsR498G0204369900.01.T01 |                                                                        |
| maker-2-augustus-gene-260.12-mRNA-1  | NA | NA       |               | 0            | OsR498G0204370600.01.T01 | Regulator of nonsense transcripts 2                                    |
| maker-2-augustus-gene-260.16-mRNA-1  | NA | NA       |               | Os02g0631700 | OsR498G0204371000.01.T01 | Two-component response regulator ORR5                                  |
| maker-2-augustus-gene-260.9-mRNA-1   | NA | NA       |               | Os02g0631200 | OsR498G0204370400.01.T05 | Putative homeodomain-like transcription factor superfamily protein     |
| maker-2-augustus-gene-261.32-mRNA-1  | NA | NA       |               | Os02g0632500 | OsR498G0204376100.01.T06 | ADP-ribosylation factor GTPase-activating protein AGD4-like            |
| maker-2-augustus-gene-262.27-mRNA-1  | NA | Indica   | Kinase-TM     | Os02g0633066 | OsR498G0204379000.01.T01 | Wall-associated receptor kinase 2-like                                 |
| maker-2-augustus-gene-262.30-mRNA-1  | NA | NA       | Kinase-TM     |              |                          | Wall-associated receptor kinase 4                                      |
| maker-2-augustus-gene-262.38-mRNA-1  | NA | NA       |               |              |                          | B-block binding subunit of TFIIC                                       |
| maker-2-augustus-gene-262.44-mRNA-1  | NA | NA       |               | Os02g0633400 | OsR498G0204380600.01.T01 | Replication factor A                                                   |
| maker-2-augustus-gene-262.48-mRNA-1  | NA | NA       |               | 0            | OsR498G0204381800.01.T01 | Glycosyltransferase                                                    |
| maker-2-augustus-gene-265.24-mRNA-1  | NA | NA       |               |              |                          | Retrotransposon protein, putative, Ty3-gypsy sub-class                 |
| maker-2-augustus-gene-266.32-mRNA-1  | NA | Indica   |               | Os02g0642700 | OsR498G0204405900.01.T02 | CAP10 domain-containing protein                                        |

|                                     |    |          |               |              |                          |                                                                               |
|-------------------------------------|----|----------|---------------|--------------|--------------------------|-------------------------------------------------------------------------------|
| maker-2-augustus-gene-266.52-mRNA-1 | NA | NA       |               | Os02g0643000 | OsR498G0204407200.01.T01 | MSP domain-containing protein (Fragment)                                      |
| maker-2-augustus-gene-266.56-mRNA-1 | NA | NA       |               | Os02g0643200 | OsR498G0204408000.01.T01 | Axial regulator YABBY 1                                                       |
| maker-2-augustus-gene-267.0-mRNA-1  | NA | Indica   |               | Os04g0537800 | OsR498G0204410700.01.T01 | Cysteine-rich repeat secretory protein 15                                     |
| maker-2-augustus-gene-267.17-mRNA-1 | NA | NA       |               | Os02g0645100 | OsR498G0204416000.01.T02 | Kinesin-related protein1                                                      |
| maker-2-augustus-gene-267.19-mRNA-1 | NA | NA       |               | Os11g0660000 | OsR498G0204415200.01.T01 | Magnesiumproton exchanger                                                     |
| maker-2-augustus-gene-267.27-mRNA-1 | NA | NA       |               | Os02g0645100 | OsR498G0204416000.01.T02 | Kinesin-like protein KIN-7C                                                   |
| maker-2-augustus-gene-27.15-mRNA-1  | NA | NA       |               | Os02g0147800 | OsR498G0202970100.01.T01 | Pathogenesis-related homeodomain protein                                      |
| maker-2-augustus-gene-27.22-mRNA-1  | NA | NA       |               | 0            | OsR498G0202973100.01.T01 | COP1-interactive protein 1-like isoform X2                                    |
| maker-2-augustus-gene-27.4-mRNA-1   | NA | NA       |               | Os02g0147700 | OsR498G0202969700.01.T02 | DNA-binding protein BIN4                                                      |
| maker-2-augustus-gene-274.29-mRNA-1 | NA | NA       |               | Os02g0658600 | OsR498G0204456300.01.T01 | Expansin-like EG45 domain-containing protein                                  |
| maker-2-augustus-gene-276.14-mRNA-1 | NA | NA       |               |              |                          | BEACH-type PH domain-containing protein                                       |
| maker-2-augustus-gene-28.15-mRNA-1  | NA | NA       |               | Os02g0150700 | OsR498G0202981900.01.T02 | E3 ubiquitin-protein ligase Arkadia                                           |
| maker-2-augustus-gene-28.19-mRNA-1  | NA | Indica   |               | Os02g0150800 | OsR498G0202982300.01.T05 | Putative LOV domain-containing protein                                        |
| maker-2-augustus-gene-28.22-mRNA-1  | NA | Indica   |               | Os02g0150100 | OsR498G0202980400.01.T02 | DEAD-box ATP-dependent RNA helicase 35A                                       |
| maker-2-augustus-gene-282.24-mRNA-1 | NA | NA       |               | Os02g0673500 | OsR498G0204505500.01.T02 | Transcription factor bHLH157                                                  |
| maker-2-augustus-gene-29.0-mRNA-1   | NA | NA       |               | Os02g0151400 | OsR498G0202985100.01.T06 | KARI N-terminal Rossmann domain-containing protein                            |
| maker-2-augustus-gene-29.11-mRNA-1  | NA | NA       |               | Os02g0152400 | OsR498G0202986700.01.T01 | Ribulose biphosphate carboxylase small chain                                  |
| maker-2-augustus-gene-29.13-mRNA-1  | NA | NA       |               | Os02g0150900 | OsR498G0202982600.01.T02 | C2H2-type domain-containing protein (Fragment)                                |
| maker-2-augustus-gene-29.19-mRNA-1  | NA | NA       | Kinase-LRR-TM | 0            | OsR498G0202983400.01.T02 | Putative leucine-rich repeat receptor-like protein kinase                     |
| maker-2-augustus-gene-29.22-mRNA-1  | NA | NA       |               | Os02g0151300 | OsR498G0202983600.01.T01 | Endoglucanase                                                                 |
| maker-2-augustus-gene-29.24-mRNA-1  | NA | NA       |               | Os10g0408700 |                          | Protein-serine/threonine phosphatase                                          |
| maker-2-augustus-gene-29.27-mRNA-1  | NA | NA       |               | Os02g0152500 | OsR498G0202986600.01.T02 | Fibronectin                                                                   |
| maker-2-augustus-gene-29.5-mRNA-1   | NA | NA       |               | Os05g0573700 | OsR498G0511380000.01.T03 | Acetohydroxy-acid reductoisomerase                                            |
| maker-2-augustus-gene-29.8-mRNA-1   | NA | NA       | CC-Kinase-TM  | Os02g0152300 | OsR498G0202986300.01.T01 | Cyclophilin-like peptidyl-prolyl cis-trans isomerase family protein isoform 1 |
| maker-2-augustus-gene-296.16-mRNA-1 | NA | NA       |               | Os02g0700700 | OsR498G0204601200.01.T03 | Protein BREVIS RADIX                                                          |
| maker-2-augustus-gene-296.6-mRNA-1  | NA | NA       | Kinase-TM     | Os02g0700600 | OsR498G0204600900.01.T03 | Serine/threonine-protein kinase MHK                                           |
| maker-2-augustus-gene-297.73-mRNA-1 | NA | NA       |               |              |                          | Plant specific Rop nucleotide exchanger, PRONE                                |
| maker-2-augustus-gene-298.0-mRNA-1  | NA | Indica   |               | Os02g0703600 | OsR498G0204611500.01.T01 | Abscisic acid 8'-hydroxylase                                                  |
| maker-2-augustus-gene-3.41-mRNA-1   | NA | NA       |               | Os02g0105900 | OsR498G0202815400.01.T01 | S4 RNA-binding domain-containing protein (Fragment)                           |
| maker-2-augustus-gene-30.16-mRNA-1  | NA | NA       |               | Os02g0152900 | OsR498G0202988400.01.T01 | Putative WAS/WASL-interacting protein family member 1-like                    |
| maker-2-augustus-gene-30.7-mRNA-1   | NA | NA       |               | Os02g0152600 |                          | DNA-directed RNA polymerase subunit                                           |
| maker-2-augustus-gene-30.9-mRNA-1   | NA | NA       |               | 0            | OsR498G0202987400.01.T07 | DNA-directed RNA polymerase subunit                                           |
| maker-2-augustus-gene-301.26-mRNA-1 | NA | NA       |               | 0            | OsR498G0204626700.01.T01 | Putative SET-domain transcriptional regulator                                 |
| maker-2-augustus-gene-31.58-mRNA-1  | NA | NA       | LRR-TM        | Os02g0157150 |                          | Protein kinase domain-containing protein (Fragment)                           |
| maker-2-augustus-gene-31.61-mRNA-1  | NA | Indica   |               | Os02g0157600 | OsR498G0203001700.01.T01 | Rhodanese domain-containing protein                                           |
| maker-2-augustus-gene-31.66-mRNA-1  | NA | NA       | LRR-TM        |              |                          | Tyrosine-sulfated glycopeptide receptor 1                                     |
| maker-2-augustus-gene-31.67-mRNA-1  | NA | Japonica | LRR-TM        | Os02g0157200 | OsR498G0202990800.01.T01 | Tyrosine-sulfated glycopeptide receptor 1                                     |
| maker-2-augustus-gene-310.40-mRNA-1 | NA | Indica   |               | Os06g0284200 | OsR498G0204688900.01.T01 | O-fucosyltransferase family protein                                           |
| maker-2-augustus-gene-310.55-mRNA-1 | NA | NA       |               | Os02g0727500 | OsR498G0204691000.01.T01 | Conserved alpha-helical protein                                               |
| maker-2-augustus-gene-314.56-mRNA-1 | NA | NA       |               | 0            | OsR498G1120154400.01.T01 |                                                                               |
| maker-2-augustus-gene-316.5-mRNA-1  | NA | NA       |               | Os02g0738600 | OsR498G0204735300.01.T01 | Endoglucanase                                                                 |
| maker-2-augustus-gene-32.51-mRNA-1  | NA | NA       |               | 0            | OsR498G0203002900.01.T01 | RRM domain-containing protein (Fragment)                                      |
| maker-2-augustus-gene-32.53-mRNA-1  | NA | NA       |               | Os02g0158300 | OsR498G0203004900.01.T01 | Arabinose 5-phosphate isomerase KdsD                                          |
| maker-2-augustus-gene-32.68-mRNA-1  | NA | NA       |               | 0            | OsR498G0203002000.01.T05 | Translation factor GUF1 homolog, mitochondrial                                |
| maker-2-augustus-gene-32.77-mRNA-1  | NA | NA       |               |              |                          | single-stranded DNA-binding protein WHY2, mitochondrial                       |
| maker-2-augustus-gene-32.84-mRNA-1  | NA | NA       |               | Os02g0158600 | OsR498G0203005600.01.T01 |                                                                               |
| maker-2-augustus-gene-321.38-mRNA-1 | NA | NA       |               | 0            | OsR498G1019076900.01.T01 | Retrotransposon protein, putative, unclassified                               |
| maker-2-augustus-gene-322.42-mRNA-1 | NA | NA       |               | Os06g0685200 | OsR498G0613205200.01.T01 |                                                                               |
| maker-2-augustus-gene-322.44-mRNA-1 | NA | NA       |               | 0            | OsR498G0613204600.01.T01 | FBD domain-containing protein                                                 |
| maker-2-augustus-gene-322.46-mRNA-1 | NA | NA       |               | Os06g0684000 | OsR498G0613203200.01.T03 |                                                                               |
| maker-2-augustus-gene-322.53-mRNA-1 | NA | NA       |               | Os06g0685700 | OsR498G0613206900.01.T04 | Auxin response factor                                                         |
| maker-2-augustus-gene-322.56-mRNA-1 | NA | NA       |               | 0            | OsR498G0613205300.01.T01 | Calcium lipid binding protein, putative                                       |
| maker-2-augustus-gene-322.63-mRNA-1 | NA | NA       |               | 0            | OsR498G0816152000.01.T01 | Endonuclease                                                                  |
| maker-2-augustus-gene-323.0-mRNA-1  | NA | NA       |               | Os06g0683200 | OsR498G0613200400.01.T01 | KOW domain-containing protein                                                 |
| maker-2-augustus-gene-323.15-mRNA-1 | NA | NA       |               | Os06g0682750 | OsR498G0613199200.01.T01 | SWAP (Suppressor-of-White-Apricot)/surp RNA-binding domain-containing p       |
| maker-2-augustus-gene-323.16-mRNA-1 | NA | Japonica |               | Os06g0682750 | OsR498G0204682400.01.T01 | AAI domain-containing protein                                                 |
| maker-2-augustus-gene-323.21-mRNA-1 | NA | NA       |               | Os06g0681200 | OsR498G0613194400.01.T01 | Phytoecyanin domain-containing protein (Fragment)                             |
| maker-2-augustus-gene-323.23-mRNA-1 | NA | NA       |               | Os06g0681100 | OsR498G0613194000.01.T01 | DUF629 domain-containing protein                                              |
| maker-2-augustus-gene-323.25-mRNA-1 | NA | NA       |               | Os06g0683300 | OsR498G0613200500.01.T05 | Beta-glucosidase 25                                                           |
| maker-2-augustus-gene-323.3-mRNA-1  | NA | NA       |               | Os06g0683100 | OsR498G0613200200.01.T03 | Dihydroflavonol-4-reductase                                                   |
| maker-2-augustus-gene-323.31-mRNA-1 | NA | NA       |               | Os06g0683000 | OsR498G0613199900.01.T01 | Dihydroflavonol-4-reductase-like isoform X1                                   |

|                                     |    |          |           |              |                          |                                                             |
|-------------------------------------|----|----------|-----------|--------------|--------------------------|-------------------------------------------------------------|
| maker-2-augustus-gene-323.33-mRNA-1 | NA | NA       |           | Os06g0681700 | OsR498G0613197700.01.T01 | thiamine-repressible mitochondrial transport protein THI74  |
| maker-2-augustus-gene-323.36-mRNA-1 | NA | NA       |           | Os06g0681600 | OsR498G0613197300.01.T01 | Peroxidase                                                  |
| maker-2-augustus-gene-323.37-mRNA-1 | NA | NA       |           | Os06g0681600 | OsR498G0613197300.01.T02 | Peroxidase                                                  |
| maker-2-augustus-gene-323.5-mRNA-1  | NA | NA       |           | Os06g0682900 | OsR498G0613199600.01.T02 | Protein HEAT-STRESS-ASSOCIATED 32                           |
| maker-2-augustus-gene-323.9-mRNA-1  | NA | NA       |           |              |                          | Zinc finger CCCH domain-containing protein 13               |
| maker-2-augustus-gene-324.26-mRNA-1 | NA | NA       |           | Os11g0599101 | OsR498G1120454300.01.T02 | DUF629 domain-containing protein                            |
| maker-2-augustus-gene-324.28-mRNA-1 | NA | NA       |           | 0            | OsR498G0613192000.01.T02 | Glucose-6-phosphate/phosphate translocator 2, chloroplastic |
| maker-2-augustus-gene-324.31-mRNA-1 | NA | NA       |           | Os06g0680900 | OsR498G0613192000.01.T01 | Exostosin domain-containing protein                         |
| maker-2-augustus-gene-324.33-mRNA-1 | NA | NA       |           | 0            | OsR498G0613183800.01.T01 | RNI-like superfamily protein isoform 2                      |
| maker-2-augustus-gene-324.36-mRNA-1 | NA | NA       |           | Os06g0680700 | OsR498G0613191300.01.T01 | Cytochrome P450, E-class, group I                           |
| maker-2-augustus-gene-324.38-mRNA-1 | NA | NA       |           | Os06g0680500 | OsR498G0613191100.01.T03 | Glutamate receptor                                          |
| maker-2-augustus-gene-324.42-mRNA-1 | NA | NA       |           | Os06g0679800 | OsR498G0613183900.01.T01 | Heat shock protein 16                                       |
| maker-2-augustus-gene-325.0-mRNA-1  | NA | NA       |           | Os06g0679400 | OsR498G0613183000.01.T01 | Myb domain protein 101                                      |
| maker-2-augustus-gene-325.10-mRNA-1 | NA | NA       |           | Os06g0678200 | OsR498G0613178200.01.T01 | Geranyl pyrophosphate synthase                              |
| maker-2-augustus-gene-325.16-mRNA-1 | NA | NA       |           | Os06g0679500 | OsR498G0613183300.01.T01 | Hexosyltransferase                                          |
| maker-2-augustus-gene-325.2-mRNA-1  | NA | NA       |           | Os06g0678800 | OsR498G0613181000.01.T01 | L-ascorbate oxidase homolog isoform X1                      |
| maker-2-augustus-gene-325.21-mRNA-1 | NA | NA       |           | Os02g0656300 | OsR498G0204447900.01.T01 | Anaphase-promoting complex subunit 8 like                   |
| maker-2-augustus-gene-325.25-mRNA-1 | NA | NA       |           | Os06g0678100 |                          | Auxilin-like protein 1 isoform C                            |
| maker-2-augustus-gene-325.5-mRNA-1  | NA | NA       |           |              |                          | BEACH domain-containing protein lvsC                        |
| maker-2-augustus-gene-326.26-mRNA-1 | NA | NA       |           | Os06g0677800 | OsR498G0613174400.01.T03 | Auxin response factor                                       |
| maker-2-augustus-gene-326.31-mRNA-1 | NA | NA       |           |              |                          | Patatin group A-3                                           |
| maker-2-augustus-gene-326.33-mRNA-1 | NA | NA       | Kinase-TM | Os06g0676600 | OsR498G0613170800.01.T03 | Serine/threonine protein kinase Stpk-D                      |
| maker-2-augustus-gene-326.37-mRNA-1 | NA | NA       |           | Os06g0677700 | OsR498G0613174100.01.T01 | Cleavage and polyadenylation specificity factor like        |
| maker-2-augustus-gene-326.42-mRNA-1 | NA | NA       | LRR       | Os06g0677500 | OsR498G0613173700.01.T01 | Protein geranylgeranyltransferase type II                   |
| maker-2-augustus-gene-326.46-mRNA-1 | NA | NA       |           | Os06g0677400 | OsR498G0613173500.01.T04 | 3-hydroxyisobutyrate dehydrogenase                          |
| maker-2-augustus-gene-326.51-mRNA-1 | NA | NA       |           | Os06g0677300 | OsR498G0613173300.01.T01 | RING-CH-type domain-containing protein (Fragment)           |
| maker-2-augustus-gene-327.11-mRNA-1 | NA | NA       |           | Os06g0675700 | OsR498G0613167000.01.T01 | Glycosyl hydrolases family 31 protein                       |
| maker-2-augustus-gene-327.14-mRNA-1 | NA | NA       |           | Os06g0675600 | OsR498G0613166500.01.T01 | NAC transcription factor 7                                  |
| maker-2-augustus-gene-327.16-mRNA-1 | NA | NA       |           | 0            | OsR498G0613164900.01.T06 | BTB domain-containing protein                               |
| maker-2-augustus-gene-327.4-mRNA-1  | NA | NA       |           | 0            | OsR498G0613167600.01.T04 | Metal transporter Nramp3                                    |
| maker-2-augustus-gene-328.23-mRNA-1 | NA | NA       |           | Os06g0674100 | OsR498G0613164400.01.T02 |                                                             |
| maker-2-augustus-gene-328.27-mRNA-1 | NA | NA       |           | Os06g0674000 | OsR498G0613163800.01.T02 |                                                             |
| maker-2-augustus-gene-328.29-mRNA-1 | NA | NA       |           | Os06g0673300 | OsR498G0613162800.01.T04 | Ubiquitin-like domain-containing protein                    |
| maker-2-augustus-gene-328.31-mRNA-1 | NA | NA       |           | Os06g0672801 | OsR498G0613160200.01.T01 | DUF862 domain-containing protein                            |
| maker-2-augustus-gene-328.33-mRNA-1 | NA | NA       |           | 0            | OsR498G0613159800.01.T01 | DUF862 domain-containing protein                            |
| maker-2-augustus-gene-329.26-mRNA-1 | NA | NA       |           | Os06g0671900 | OsR498G0613156400.01.T01 | Tubulin beta chain                                          |
| maker-2-augustus-gene-329.30-mRNA-1 | NA | NA       |           | Os06g0671300 | OsR498G0613153800.01.T01 | Ent-isokaurene C2-hydroxylase-like                          |
| maker-2-augustus-gene-329.32-mRNA-1 | NA | NA       |           | Os06g0671800 | OsR498G0613156100.01.T02 | Patellin-4                                                  |
| maker-2-augustus-gene-329.35-mRNA-1 | NA | NA       |           | 0            | OsR498G0613155900.01.T03 | Twinkle homolog protein chloroplastic/mitochondrial         |
| maker-2-augustus-gene-329.40-mRNA-1 | NA | NA       |           | Os06g0671000 | OsR498G0613151300.01.T04 | Potassium transporter                                       |
| maker-2-augustus-gene-329.46-mRNA-1 | NA | NA       |           | Os06g0670500 | OsR498G0613149700.01.T05 | Peptidyl-prolyl cis-trans isomerase                         |
| maker-2-augustus-gene-329.52-mRNA-1 | NA | NA       |           | Os06g0670500 | OsR498G0613149500.01.T03 | Peptidyl-prolyl cis-trans isomerase                         |
| maker-2-augustus-gene-330.0-mRNA-1  | NA | Japonica |           | Os02g0160100 | OsR498G0203010500.01.T01 |                                                             |
| maker-2-augustus-gene-330.0-mRNA-1  | NA | NA       |           | Os06g0670100 | OsR498G0613146600.01.T01 | Dentin sialophosphoprotein-like                             |
| maker-2-augustus-gene-330.13-mRNA-1 | NA | NA       |           | Os06g0669400 | OsR498G0613145400.01.T05 | ATP-dependent zinc metalloprotease                          |
| maker-2-augustus-gene-330.17-mRNA-1 | NA | NA       |           | 0            | OsR498G0613145000.01.T02 | Nucleotidyltransferase family protein isoform 4             |
| maker-2-augustus-gene-330.2-mRNA-1  | NA | NA       |           | Os06g0669700 | OsR498G0613145800.01.T01 | HTH myb-type domain-containing protein (Fragment)           |
| maker-2-augustus-gene-330.25-mRNA-1 | NA | NA       |           | Os06g0669150 | OsR498G0613144600.01.T02 | BHLH domain-containing protein                              |
| maker-2-augustus-gene-330.27-mRNA-1 | NA | NA       |           | 0            | OsR498G0613143800.01.T01 | CRIB domain-containing protein                              |
| maker-2-augustus-gene-330.29-mRNA-1 | NA | NA       |           | Os06g0670300 | OsR498G0613148900.01.T01 | HTH myb-type domain-containing protein                      |
| maker-2-augustus-gene-330.31-mRNA-1 | NA | NA       |           | 0            | OsR498G0613146300.01.T02 | Molybdenum cofactor sulfurase                               |
| maker-2-augustus-gene-330.38-mRNA-1 | NA | NA       |           | Os06g0669800 | OsR498G0613145900.01.T02 | OTU domain-containing protein                               |
| maker-2-augustus-gene-330.8-mRNA-1  | NA | NA       |           | 0            | OsR498G0613145600.01.T01 | Component of oligomeric Golgi complex 7                     |
| maker-2-augustus-gene-331.44-mRNA-1 | NA | NA       |           | Os06g0668200 | OsR498G0613141000.01.T01 | Phosphoglycerate kinase                                     |
| maker-2-augustus-gene-331.49-mRNA-1 | NA | NA       |           | Os06g0667600 | OsR498G0613139600.01.T01 | Glycine cleavage system H protein (Fragment)                |
| maker-2-augustus-gene-331.52-mRNA-1 | NA | NA       |           | Os11g0205500 | OsR498G1119581200.01.T01 |                                                             |
| maker-2-augustus-gene-331.54-mRNA-1 | NA | NA       |           | Os06g0666600 | OsR498G0613135200.01.T02 | Glyceraldehyde-3-phosphate dehydrogenase                    |
| maker-2-augustus-gene-331.58-mRNA-1 | NA | NA       |           | Os03g0322500 | OsR498G0613139300.01.T03 | 14 kDa zinc-binding protein (Fragment)                      |
| maker-2-augustus-gene-331.65-mRNA-1 | NA | NA       |           |              |                          | MADS-box protein ZMM17                                      |
| maker-2-augustus-gene-332.28-mRNA-1 | NA | NA       |           |              |                          | Copper-transporting ATPase RAN1                             |
| maker-2-augustus-gene-332.30-mRNA-1 | NA | NA       |           | Os06g0665500 | OsR498G0613126200.01.T02 | Allantoate amidohydrolase                                   |

|                                     |    |          |               |              |                          |                                                                           |
|-------------------------------------|----|----------|---------------|--------------|--------------------------|---------------------------------------------------------------------------|
| maker-2-augustus-gene-332.34-mRNA-1 | NA | NA       |               | Os06g0666100 | OsR498G0613130900.01.T02 | B box-type domain-containing protein (Fragment)                           |
| maker-2-augustus-gene-332.38-mRNA-1 | NA | NA       |               | Os06g0665900 | OsR498G0613129900.01.T01 | Thiol reductase thioredoxin                                               |
| maker-2-augustus-gene-333.0-mRNA-1  | NA | NA       |               | 0            | OsR498G0613125000.01.T01 | X8 domain-containing protein (Fragment)                                   |
| maker-2-augustus-gene-333.11-mRNA-1 | NA | NA       |               | Os11g0540100 | OsR498G0613121600.01.T01 | Xaa-Pro aminopeptidase P                                                  |
| maker-2-augustus-gene-333.20-mRNA-1 | NA | NA       |               | Os06g0663800 | OsR498G0613120200.01.T01 | Peptidylprolyl isomerase                                                  |
| maker-2-augustus-gene-333.23-mRNA-1 | NA | NA       |               | Os06g0663600 | OsR498G0613119800.01.T05 | DUF295 domain-containing protein                                          |
| maker-2-augustus-gene-333.27-mRNA-1 | NA | NA       |               | 0            | OsR498G0613119200.01.T01 | SQUAMOSA promoter binding-like transcription factor                       |
| maker-2-augustus-gene-333.28-mRNA-1 | NA | NA       |               | Os06g0665000 | OsR498G0613124300.01.T02 | ALA-interacting subunit                                                   |
| maker-2-augustus-gene-333.31-mRNA-1 | NA | NA       |               | 0            | OsR498G0613123100.01.T01 | Octamer-binding transcription factor                                      |
| maker-2-augustus-gene-333.33-mRNA-1 | NA | NA       |               | Os06g0664300 | OsR498G0613122300.01.T02 | Vacuolar-sorting receptor 6 like                                          |
| maker-2-augustus-gene-333.4-mRNA-1  | NA | NA       |               | Os06g0664400 | OsR498G0613123000.01.T01 | Receptor-like protein 12-like                                             |
| maker-2-augustus-gene-333.40-mRNA-1 | NA | NA       | Kinase        | Os06g0663900 | OsR498G0613121100.01.T03 | Receptor-like cytosolic serine/threonine-protein kinase RBK1              |
| maker-2-augustus-gene-333.46-mRNA-1 | NA | NA       | Kinase-TM     | Os06g0663400 | OsR498G0613118900.01.T01 | serine/threonine-protein kinase STY13                                     |
| maker-2-augustus-gene-333.7-mRNA-1  | NA | NA       |               | Os06g0664200 | OsR498G0613121800.01.T02 | D-fructose-1,6-bisphosphate 1-phosphohydrolase                            |
| maker-2-augustus-gene-334.0-mRNA-1  | NA | NA       | Kinase        | Os06g0663200 | OsR498G0613117600.01.T02 | Putative serine/threonine-protein kinase PBL17                            |
| maker-2-augustus-gene-334.10-mRNA-1 | NA | NA       |               | Os06g0662200 | OsR498G0613112800.01.T01 | Basic leucine zipper 9                                                    |
| maker-2-augustus-gene-334.12-mRNA-1 | NA | NA       |               | Os06g0662000 | OsR498G0613112200.01.T01 | V-ATPase 69 kDa subunit                                                   |
| maker-2-augustus-gene-334.4-mRNA-1  | NA | NA       |               | 0            | OsR498G0613117200.01.T01 | tRNA pseudouridine synthase A                                             |
| maker-2-augustus-gene-335.36-mRNA-1 | NA | NA       |               | Os06g0661900 | OsR498G0613112000.01.T04 | Core-2/l-branching beta-16-N-acetylglucosaminyltransferase family protein |
| maker-2-augustus-gene-335.40-mRNA-1 | NA | NA       |               | Os06g0661800 | OsR498G0613111800.01.T01 | Cryptochrome DASH chloroplastic/mitochondrial                             |
| maker-2-augustus-gene-335.43-mRNA-1 | NA | NA       |               | Os06g0661700 | OsR498G0613111400.01.T03 | Rab-GAP TBC domain-containing protein (Fragment)                          |
| maker-2-augustus-gene-335.48-mRNA-1 | NA | NA       |               | Os06g0661500 | OsR498G0613111000.01.T01 | Serine/threonine-protein kinase STY17                                     |
| maker-2-augustus-gene-335.50-mRNA-1 | NA | NA       |               | Os06g0660600 |                          | NAM-associated domain-containing protein (Fragment)                       |
| maker-2-augustus-gene-335.53-mRNA-1 | NA | NA       |               | Os06g0661766 | OsR498G0613111500.01.T06 |                                                                           |
| maker-2-augustus-gene-335.55-mRNA-1 | NA | NA       |               |              |                          | ENTH domain-containing protein (Fragment)                                 |
| maker-2-augustus-gene-335.60-mRNA-1 | NA | NA       | Kinase-LRR-TM | 0            | OsR498G0613109100.01.T01 | Protein STRUBBELIG-RECEPTOR FAMILY 1                                      |
| maker-2-augustus-gene-335.67-mRNA-1 | NA | NA       |               | Os06g0660700 | OsR498G0613108700.01.T03 | UBC core domain-containing protein (Fragment)                             |
| maker-2-augustus-gene-335.71-mRNA-1 | NA | NA       |               | Os06g0660200 | OsR498G0613105900.01.T01 | Auxin efflux carrier component                                            |
| maker-2-augustus-gene-336.32-mRNA-1 | NA | NA       |               | Os06g0659300 | OsR498G0613102400.01.T03 | HP domain-containing protein (Fragment)                                   |
| maker-2-augustus-gene-336.39-mRNA-1 | NA | NA       |               | 0            | OsR498G0816152000.01.T01 | Transposon protein, putative, CACTA, En/Spm sub-class                     |
| maker-2-augustus-gene-336.42-mRNA-1 | NA | NA       |               | Os06g0659500 | OsR498G0613103300.01.T01 | Glutaredoxin                                                              |
| maker-2-augustus-gene-336.45-mRNA-1 | NA | NA       |               |              |                          | TRICHOME BIREFRINGENCE-LIKE 5                                             |
| maker-2-augustus-gene-336.48-mRNA-1 | NA | NA       |               | Os06g0659100 | OsR498G0613101300.01.T01 | Squamosa promoter-binding-like protein 5                                  |
| maker-2-augustus-gene-336.50-mRNA-1 | NA | NA       |               | 0            | OsR498G0613100100.01.T04 | Homogentisate geranylgeranyl transferase                                  |
| maker-2-augustus-gene-337.40-mRNA-1 | NA | NA       |               |              |                          | DUF659 domain-containing protein (Fragment)                               |
| maker-2-augustus-gene-337.48-mRNA-1 | NA | NA       |               | Os06g0658500 | OsR498G0613099100.01.T02 |                                                                           |
| maker-2-augustus-gene-339.31-mRNA-1 | NA | NA       |               | Os02g0751800 | OsR498G0204787900.01.T02 | Phosphoglycerate mutase (2,3-diphosphoglycerate-dependent)                |
| maker-2-augustus-gene-339.36-mRNA-1 | NA | NA       |               |              |                          | Inositol polyphosphate 5-phosphatase I                                    |
| maker-2-augustus-gene-339.38-mRNA-1 | NA | NA       |               | 0            | OsR498G0204789700.01.T02 | POLIIIaC domain-containing protein (Fragment)                             |
| maker-2-augustus-gene-339.40-mRNA-1 | NA | NA       |               | Os02g0753000 | OsR498G0204791500.01.T01 | Trehalose-6-phosphate phosphatase J                                       |
| maker-2-augustus-gene-339.43-mRNA-1 | NA | NA       |               | Os02g0752000 | OsR498G0204788400.01.T02 | Random slug protein 5                                                     |
| maker-2-augustus-gene-339.46-mRNA-1 | NA | NA       |               | Os02g0752200 | OsR498G0204788600.01.T01 | probable beta-D-xylosidase 7                                              |
| maker-2-augustus-gene-339.49-mRNA-1 | NA | NA       |               | Os02g0752300 | OsR498G0204789600.01.T01 |                                                                           |
| maker-2-augustus-gene-34.35-mRNA-1  | NA | NA       |               |              |                          | Zinc finger CCCH domain-containing protein 13                             |
| maker-2-augustus-gene-34.40-mRNA-1  | NA | NA       |               | 0            | OsR498G0203016300.01.T01 | TATA-binding protein-associated factor BTAF1                              |
| maker-2-augustus-gene-34.54-mRNA-1  | NA | NA       |               | Os02g0163300 |                          |                                                                           |
| maker-2-augustus-gene-340.28-mRNA-1 | NA | NA       |               | Os02g0753200 | OsR498G0204792500.01.T01 | Putative transcription factor                                             |
| maker-2-augustus-gene-340.30-mRNA-1 | NA | NA       |               | Os02g0753300 | OsR498G0204792700.01.T01 | PLAT domain-containing protein 2                                          |
| maker-2-augustus-gene-340.32-mRNA-1 | NA | NA       |               | Os02g0753900 | OsR498G0204795300.01.T03 | TLDc domain-containing protein                                            |
| maker-2-augustus-gene-340.37-mRNA-1 | NA | NA       |               | Os02g0754000 | OsR498G0204795500.01.T01 | TLDc domain-containing protein (Fragment)                                 |
| maker-2-augustus-gene-340.41-mRNA-1 | NA | NA       |               | Os02g0754300 | OsR498G0204795900.01.T01 | 50S ribosomal protein L29 chloroplastic                                   |
| maker-2-augustus-gene-340.43-mRNA-1 | NA | NA       |               | Os02g0754500 | OsR498G0204797900.01.T01 | outer envelope protein 64, mitochondrial                                  |
| maker-2-augustus-gene-340.50-mRNA-1 | NA | Japonica |               | Os02g0754600 | OsR498G0204798100.01.T01 | 1,8-cineole synthase                                                      |
| maker-2-augustus-gene-340.52-mRNA-1 | NA | NA       |               | 0            | OsR498G0204794000.01.T01 | Inactive TPR repeat-containing thioredoxin TTL3                           |
| maker-2-augustus-gene-340.55-mRNA-1 | NA | NA       |               | Os02g0753800 | OsR498G0204795200.01.T02 | Annexin                                                                   |
| maker-2-augustus-gene-340.58-mRNA-1 | NA | NA       |               | Os02g0754100 | OsR498G0204795800.01.T02 | RNB domain-containing protein (Fragment)                                  |
| maker-2-augustus-gene-340.63-mRNA-1 | NA | NA       |               | 0            | OsR498G0204796400.01.T01 | Myb domain protein 93                                                     |
| maker-2-augustus-gene-340.66-mRNA-1 | NA | NA       |               | Os02g0754700 | OsR498G0204798400.01.T03 | Histidine--tRNA ligase                                                    |
| maker-2-augustus-gene-340.71-mRNA-1 | NA | NA       |               | Os02g0754900 | OsR498G0204798800.01.T01 | 5'-adenylylsulfate reductase-like 3                                       |
| maker-2-augustus-gene-340.73-mRNA-1 | NA | NA       |               | 0            | OsR498G0204799000.01.T01 | Methyltransferase                                                         |
| maker-2-augustus-gene-341.3-mRNA-1  | NA | NA       |               | Os02g0755900 | OsR498G0204801700.01.T01 | Glycosyltransferase                                                       |

|                                     |    |        |           |              |                          |                                                                            |
|-------------------------------------|----|--------|-----------|--------------|--------------------------|----------------------------------------------------------------------------|
| maker-2-augustus-gene-341.5-mRNA-1  | NA | NA     |           | Os02g0755500 | OsR498G0204800600.01.T01 | UDP-glucuronosyl/UDP-glucosyltransferase                                   |
| maker-2-augustus-gene-341.7-mRNA-1  | NA | NA     |           | Os02g0755600 | OsR498G0204801000.01.T01 | Glycosyltransferase                                                        |
| maker-2-augustus-gene-341.9-mRNA-1  | NA | NA     |           | Os02g0756100 | OsR498G0204802400.01.T01 | EPIDERMAL PATTERNING FACTOR-like protein 1                                 |
| maker-2-augustus-gene-342.0-mRNA-1  | NA | NA     |           | Os06g0658300 | OsR498G0613100100.01.T06 | Homogentisate geranylgeranyl transferase                                   |
| maker-2-augustus-gene-342.3-mRNA-1  | NA | NA     |           | Os06g0657500 | OsR498G0613096300.01.T01 | AP2-EREBP transcription factor                                             |
| maker-2-augustus-gene-343.35-mRNA-1 | NA | NA     |           | Os06g0656500 | OsR498G0613092000.01.T01 | 4-coumarate coenzyme A ligase                                              |
| maker-2-augustus-gene-343.38-mRNA-1 | NA | NA     |           | Os06g0656700 |                          |                                                                            |
| maker-2-augustus-gene-343.43-mRNA-1 | NA | NA     |           | Os06g0656000 | OsR498G0613090100.01.T01 | (R)-mandelonitrile lyase-like                                              |
| maker-2-augustus-gene-344.0-mRNA-1  | NA | NA     |           | Os06g0655100 | OsR498G0613087000.01.T01 | Phosphoglycerate dehydrogenase                                             |
| maker-2-augustus-gene-344.14-mRNA-1 | NA | NA     |           | Os06g0653900 | OsR498G0613081200.01.T02 | Protein transport protein subunit gamma                                    |
| maker-2-augustus-gene-344.16-mRNA-1 | NA | NA     | Kinase-TM | Os06g0654500 | OsR498G0613085100.01.T01 | Concanavalin A-like lectin/glucanase domain, Serine/threonine-protein kina |
| maker-2-augustus-gene-344.18-mRNA-1 | NA | NA     |           | Os06g0654300 | OsR498G0613083100.01.T01 | Sortase system response regulator                                          |
| maker-2-augustus-gene-344.7-mRNA-1  | NA | NA     |           | Os06g0654000 | OsR498G0613081600.01.T01 | Ubiquitin-specific protease 19                                             |
| maker-2-augustus-gene-345.0-mRNA-1  | NA | NA     |           | Os06g0653200 | OsR498G0613080000.01.T01 | Transcription factor IBH1-like 1                                           |
| maker-2-augustus-gene-345.12-mRNA-1 | NA | NA     |           | Os09g0425900 | OsR498G0613079700.01.T01 | Tetraspanin/Peripherin                                                     |
| maker-2-augustus-gene-345.17-mRNA-1 | NA | NA     |           | Os06g0652600 | OsR498G0613077700.01.T01 | Fibroin heavy chain-like                                                   |
| maker-2-augustus-gene-345.19-mRNA-1 | NA | NA     |           |              |                          | E3 ubiquitin-protein ligase DA2-like isoform X1                            |
| maker-2-augustus-gene-345.2-mRNA-1  | NA | NA     |           | 0            | OsR498G0613076600.01.T01 | Heptahelical transmembrane protein 2                                       |
| maker-2-augustus-gene-345.21-mRNA-1 | NA | NA     |           | Os06g0652000 | OsR498G0613076100.01.T01 | DNA-directed RNA polymerase                                                |
| maker-2-augustus-gene-345.28-mRNA-1 | NA | NA     |           |              |                          | Hydrophobic protein OSR8                                                   |
| maker-2-augustus-gene-345.4-mRNA-1  | NA | NA     |           | Os06g0651600 | OsR498G0613075200.01.T03 | Protein-serine/threonine phosphatase                                       |
| maker-2-augustus-gene-345.9-mRNA-1  | NA | NA     |           | Os06g0651300 | OsR498G0613075000.01.T01 | Protein-serine/threonine phosphatase                                       |
| maker-2-augustus-gene-346.0-mRNA-1  | NA | NA     |           | Os06g0651100 | OsR498G0613074600.01.T01 | NADPH-dependent HC-toxin reductase                                         |
| maker-2-augustus-gene-346.11-mRNA-1 | NA | NA     |           | 0            | OsR498G0613071000.01.T01 | N-acetyltransferase HLS1                                                   |
| maker-2-augustus-gene-346.13-mRNA-1 | NA | NA     |           | Os06g0649900 | OsR498G0613070000.01.T03 | PLD phosphodiesterase domain-containing protein                            |
| maker-2-augustus-gene-346.15-mRNA-1 | NA | NA     |           | Os06g0649800 | OsR498G0613069400.01.T01 | Putative GMP synthase [glutamine-hydrolyzing]                              |
| maker-2-augustus-gene-346.19-mRNA-1 | NA | NA     |           | Os06g0651200 |                          |                                                                            |
| maker-2-augustus-gene-346.21-mRNA-1 | NA | NA     |           | Os06g0650600 | OsR498G0613072900.01.T04 | Transmembrane 9 superfamily member                                         |
| maker-2-augustus-gene-346.3-mRNA-1  | NA | NA     |           | Os06g0651000 | OsR498G0613074200.01.T01 | NADPH-dependent HC-toxin reductase                                         |
| maker-2-augustus-gene-346.6-mRNA-1  | NA | NA     |           | Os06g0650900 | OsR498G0613074000.01.T01 | J domain-containing protein (Fragment)                                     |
| maker-2-augustus-gene-346.8-mRNA-1  | NA | NA     |           | Os06g0650800 | OsR498G0613073200.01.T01 | Magnesium transporter                                                      |
| maker-2-augustus-gene-347.30-mRNA-1 | NA | NA     |           | Os06g0649000 | OsR498G0613065200.01.T01 | WRKY transcription factor                                                  |
| maker-2-augustus-gene-347.32-mRNA-1 | NA | NA     |           | Os06g0648500 | OsR498G0613064000.01.T01 | Protein POLAR LOCALIZATION DURING ASYMMETRIC DIVISION AND REDISTR          |
| maker-2-augustus-gene-347.34-mRNA-1 | NA | NA     |           | Os06g0647900 | OsR498G0613062800.01.T01 |                                                                            |
| maker-2-augustus-gene-347.37-mRNA-1 | NA | NA     |           | Os06g0649500 | OsR498G0613067300.01.T01 | Transcription initiation factor TFIID subunit like                         |
| maker-2-augustus-gene-348.0-mRNA-1  | NA | NA     |           | Os06g0647400 | OsR498G0613061000.01.T01 | Lysosomal Pro-X carboxypeptidase                                           |
| maker-2-augustus-gene-348.10-mRNA-1 | NA | NA     |           | 0            | OsR498G0613058600.01.T02 | BZIP transcription factor (Fragment)                                       |
| maker-2-augustus-gene-348.16-mRNA-1 | NA | NA     |           | Os06g0646600 | OsR498G0613057800.01.T04 | Knotted 7                                                                  |
| maker-2-augustus-gene-348.19-mRNA-1 | NA | NA     |           | Os06g0646000 | OsR498G0613055600.01.T01 | Methyltransferase-like                                                     |
| maker-2-augustus-gene-348.27-mRNA-1 | NA | NA     |           | Os06g0647100 | OsR498G0613059700.01.T01 | 50S ribosomal protein L35, chloroplastic                                   |
| maker-2-augustus-gene-348.29-mRNA-1 | NA | NA     |           | Os06g0646500 | OsR498G0613057500.01.T01 | ATP synthase subunit O mitochondrial                                       |
| maker-2-augustus-gene-348.34-mRNA-1 | NA | NA     | Kinase-TM | 0            | OsR498G0613057100.01.T01 | Trithorax group protein osa-like                                           |
| maker-2-augustus-gene-348.4-mRNA-1  | NA | NA     |           | Os06g0646900 | OsR498G0613059200.01.T01 | Homogentisate geranylgeranyl transferase                                   |
| maker-2-augustus-gene-349.0-mRNA-1  | NA | NA     |           | 0            | OsR498G0613055400.01.T02 | Transcription initiation factor TFIID subunit 1                            |
| maker-2-augustus-gene-349.10-mRNA-1 | NA | NA     |           | Os06g0644800 | OsR498G0613052600.01.T01 | PRKCSH domain-containing protein (Fragment)                                |
| maker-2-augustus-gene-349.14-mRNA-1 | NA | Indica |           | Os02g0183700 | OsR498G0613053500.01.T02 | Isoleucyl-tRNA synthetase                                                  |
| maker-2-augustus-gene-349.22-mRNA-1 | NA | NA     |           | 0            | OsR498G0613052100.01.T01 | Transducin family protein / WD-40 repeat family protein                    |
| maker-2-augustus-gene-349.38-mRNA-1 | NA | NA     |           | Os06g0644200 | OsR498G0613050500.01.T03 | H(+)-exporting diphosphatase                                               |
| maker-2-augustus-gene-349.45-mRNA-1 | NA | NA     |           | Os06g0644100 | OsR498G0613050100.01.T01 | ER membrane protein complex subunit 7 like                                 |
| maker-2-augustus-gene-349.5-mRNA-1  | NA | NA     |           | Os06g0645600 |                          | PLATZ transcription factor family protein                                  |
| maker-2-augustus-gene-349.8-mRNA-1  | NA | NA     |           |              |                          |                                                                            |
| maker-2-augustus-gene-35.0-mRNA-1   | NA | NA     |           | Os02g0163400 |                          |                                                                            |
| maker-2-augustus-gene-35.20-mRNA-1  | NA | NA     | Kinase-TM | Os02g0165100 | OsR498G0203030300.01.T07 | Serine/threonine protein kinase Stpk-B                                     |
| maker-2-augustus-gene-35.23-mRNA-1  | NA | NA     |           | 0            | OsR498G0203030300.01.T05 | Protein kinase domain-containing protein                                   |
| maker-2-augustus-gene-35.26-mRNA-1  | NA | NA     |           | Os02g0163500 |                          |                                                                            |
| maker-2-augustus-gene-35.28-mRNA-1  | NA | NA     |           | Os02g0163600 |                          |                                                                            |
| maker-2-augustus-gene-35.30-mRNA-1  | NA | NA     |           | Os02g0164000 |                          |                                                                            |
| maker-2-augustus-gene-350.27-mRNA-1 | NA | NA     |           | Os06g0643900 | OsR498G0613049800.01.T01 | Purple acid phosphatase                                                    |
| maker-2-augustus-gene-350.32-mRNA-1 | NA | Indica |           | Os02g0184400 | OsR498G0613048800.01.T01 | UDP-glucose-fructose-phosphate glucosyltransferase                         |
| maker-2-augustus-gene-350.46-mRNA-1 | NA | NA     |           | Os06g0643700 | OsR498G0613048600.01.T01 | Heptahelical transmembrane protein 1                                       |
| maker-2-augustus-gene-350.49-mRNA-1 | NA | NA     |           | Os06g0643600 | OsR498G0613048200.01.T01 | DNA-(apurinic or apyrimidinic site) lyase                                  |

|                                     |    |          |           |              |                          |                                                                          |
|-------------------------------------|----|----------|-----------|--------------|--------------------------|--------------------------------------------------------------------------|
| maker-2-augustus-gene-350.53-mRNA-1 | NA | NA       |           | Os06g0643100 | OsR498G0613046600.01.T01 | Proteasome endopeptidase complex                                         |
| maker-2-augustus-gene-350.64-mRNA-1 | NA | NA       |           | Os06g0642900 | OsR498G0613045600.01.T01 | Ubiquitin system component Cue protein                                   |
| maker-2-augustus-gene-350.67-mRNA-1 | NA | NA       |           | 0            | OsR498G0613044800.01.T01 | Ubiquitin system component Cue protein                                   |
| maker-2-augustus-gene-350.70-mRNA-1 | NA | Indica   |           | Os02g0186800 | OsR498G0613044600.01.T01 | Premnaspirodiene oxygenase                                               |
| maker-2-augustus-gene-351.44-mRNA-1 | NA | NA       |           | Os11g0635500 | OsR498G0613042000.01.T01 | Cytochrome P450 family protein, expressed                                |
| maker-2-augustus-gene-351.46-mRNA-1 | NA | NA       |           | Os06g0671300 | OsR498G0613044300.01.T01 | Ent-cassadiene C2-hydroxylase                                            |
| maker-2-augustus-gene-351.48-mRNA-1 | NA | NA       |           | Os06g0641500 | OsR498G0613041700.01.T02 | Ent-cassadiene C2-hydroxylase                                            |
| maker-2-augustus-gene-351.49-mRNA-1 | NA | NA       |           | Os06g0640800 | OsR498G0613039900.01.T01 | Premnaspirodiene oxygenase                                               |
| maker-2-augustus-gene-351.50-mRNA-1 | NA | NA       |           | Os06g0640500 | OsR498G0613038900.01.T01 | Premnaspirodiene oxygenase                                               |
| maker-2-augustus-gene-351.58-mRNA-1 | NA | NA       |           | Os06g0640800 | OsR498G0613040900.01.T01 | Premnaspirodiene oxygenase                                               |
| maker-2-augustus-gene-352.27-mRNA-1 | NA | NA       |           | Os02g0751800 | OsR498G0204787900.01.T02 | Phosphoglycerate mutase (2,3-diphosphoglycerate-dependent)               |
| maker-2-augustus-gene-352.32-mRNA-1 | NA | NA       |           |              |                          | Inositol polyphosphate 5-phosphatase I                                   |
| maker-2-augustus-gene-352.34-mRNA-1 | NA | NA       |           | 0            | OsR498G0204789700.01.T02 | POLIIIAc domain-containing protein (Fragment)                            |
| maker-2-augustus-gene-352.36-mRNA-1 | NA | NA       |           | Os02g0752000 | OsR498G0204788400.01.T02 | Random slug protein 5                                                    |
| maker-2-augustus-gene-352.39-mRNA-1 | NA | NA       |           | Os02g0752200 | OsR498G0204788600.01.T01 | probable beta-D-xylosidase 7                                             |
| maker-2-augustus-gene-352.42-mRNA-1 | NA | NA       |           | Os02g0752300 | OsR498G0204789600.01.T01 |                                                                          |
| maker-2-augustus-gene-353.27-mRNA-1 | NA | NA       |           | Os02g0753000 | OsR498G0204791500.01.T01 | Trehalose-6-phosphate phosphatase J                                      |
| maker-2-augustus-gene-353.30-mRNA-1 | NA | NA       |           | Os02g0753200 | OsR498G0204792500.01.T01 | Putative transcription factor                                            |
| maker-2-augustus-gene-353.32-mRNA-1 | NA | NA       |           | Os02g0753300 | OsR498G0204792700.01.T01 | PLAT domain-containing protein 2                                         |
| maker-2-augustus-gene-353.34-mRNA-1 | NA | NA       |           | Os02g0753900 | OsR498G0204795300.01.T03 | TLDC domain-containing protein                                           |
| maker-2-augustus-gene-353.39-mRNA-1 | NA | NA       |           | Os02g0754000 | OsR498G0204795500.01.T01 | TLDC domain-containing protein (Fragment)                                |
| maker-2-augustus-gene-353.45-mRNA-1 | NA | NA       |           | Os02g0754500 | OsR498G0204797900.01.T01 | outer envelope protein 64, mitochondrial                                 |
| maker-2-augustus-gene-353.52-mRNA-1 | NA | Japonica |           | Os02g0754600 | OsR498G0204798100.01.T01 | 1,8-cineole synthase                                                     |
| maker-2-augustus-gene-353.54-mRNA-1 | NA | NA       |           | 0            | OsR498G0204794000.01.T01 | Inactive TPR repeat-containing thioredoxin TTL3                          |
| maker-2-augustus-gene-353.57-mRNA-1 | NA | NA       |           | Os02g0753800 | OsR498G0204795200.01.T02 | Annexin                                                                  |
| maker-2-augustus-gene-353.60-mRNA-1 | NA | NA       |           | Os02g0754100 | OsR498G0204795800.01.T02 | RNB domain-containing protein (Fragment)                                 |
| maker-2-augustus-gene-353.65-mRNA-1 | NA | NA       |           | 0            | OsR498G0204796400.01.T01 | Myb domain protein 93                                                    |
| maker-2-augustus-gene-354.0-mRNA-1  | NA | Indica   |           | Os02g0755400 | OsR498G0204800300.01.T01 | Putative RNA-binding protein ARP1                                        |
| maker-2-augustus-gene-354.10-mRNA-1 | NA | NA       |           | Os02g0754900 | OsR498G0204798800.01.T01 | 5'-adenylylsulfate reductase-like 3                                      |
| maker-2-augustus-gene-354.12-mRNA-1 | NA | NA       |           | 0            | OsR498G0204799000.01.T01 | Methyltransferase                                                        |
| maker-2-augustus-gene-354.18-mRNA-1 | NA | NA       |           | Os02g0755500 | OsR498G0204800600.01.T01 | UDP-glucuronosyl/UDP-glucosyltransferase                                 |
| maker-2-augustus-gene-354.20-mRNA-1 | NA | NA       |           | Os02g0755600 | OsR498G0204801000.01.T01 | Glycosyltransferase                                                      |
| maker-2-augustus-gene-354.22-mRNA-1 | NA | NA       |           | Os02g0756100 | OsR498G0204802400.01.T01 | EPIDERMAL PATTERNING FACTOR-like protein 1                               |
| maker-2-augustus-gene-354.3-mRNA-1  | NA | NA       |           | Os02g0755900 | OsR498G0204801700.01.T01 | Glycosyltransferase                                                      |
| maker-2-augustus-gene-354.5-mRNA-1  | NA | NA       |           | Os02g0754700 | OsR498G0204798400.01.T03 | Histidine--tRNA ligase                                                   |
| maker-2-augustus-gene-36.0-mRNA-1   | NA | NA       |           | Os09g0569450 |                          | Endoplasmic reticulum oxidoreductins 1 isoform 1                         |
| maker-2-augustus-gene-36.2-mRNA-1   | NA | Indica   |           | Os06g0675600 | OsR498G0203032000.01.T02 | NAC transcription factor                                                 |
| maker-2-augustus-gene-361.47-mRNA-1 | NA | Japonica |           | Os02g0770500 | OsR498G0204843700.01.T01 | WRKY transcription factor 9                                              |
| maker-2-augustus-gene-365.6-mRNA-1  | NA | NA       |           | 0            | OsR498G0204870100.01.T02 | Opaque endosperm1                                                        |
| maker-2-augustus-gene-37.0-mRNA-1   | NA | NA       |           | 0            | OsR498G0203040300.01.T03 | Holocarboxylase synthetase 2                                             |
| maker-2-augustus-gene-37.10-mRNA-1  | NA | NA       |           | Os02g0167300 | OsR498G0203041500.01.T01 | Tubulin beta chain                                                       |
| maker-2-augustus-gene-37.20-mRNA-1  | NA | Indica   |           | Os02g0167500 | OsR498G0203041800.01.T04 | SUPPRESSOR OF ABI3-5                                                     |
| maker-2-augustus-gene-37.30-mRNA-1  | NA | NA       |           | Os02g0167700 | OsR498G0203043400.01.T01 | TIP120 domain-containing protein                                         |
| maker-2-augustus-gene-37.39-mRNA-1  | NA | Indica   |           | Os02g0168100 | OsR498G0203044400.01.T01 | 4-hydroxyphenylpyruvate dioxygenase                                      |
| maker-2-augustus-gene-37.5-mRNA-1   | NA | NA       |           | Os02g0167100 | OsR498G0203040500.01.T02 | Thiosulfate transferase                                                  |
| maker-2-augustus-gene-372.59-mRNA-1 | NA | NA       |           | Os02g0789100 | OsR498G0204913200.01.T03 | Cyclic nucleotide-binding domain-containing protein (Fragment)           |
| maker-2-augustus-gene-379.63-mRNA-1 | NA | NA       |           | 0            | OsR498G0204965600.01.T02 | Adenylyltransferase and sulfurtransferase MOC53 1 Molybdopterin-synthase |
| maker-2-augustus-gene-38.14-mRNA-1  | NA | NA       |           | Os02g0167700 | OsR498G0203043400.01.T03 | Cullin-associated NEDD8-dissociated protein 1                            |
| maker-2-augustus-gene-38.33-mRNA-1  | NA | NA       |           | Os02g0168900 | OsR498G0203047200.01.T01 | Ribonuclease H2 subunit C                                                |
| maker-2-augustus-gene-38.35-mRNA-1  | NA | NA       |           | Os02g0169000 | OsR498G0203047400.01.T01 | ATP-dependent zinc metalloprotease                                       |
| maker-2-augustus-gene-38.39-mRNA-1  | NA | NA       |           | 0            | OsR498G0203051200.01.T03 | Piwi domain-containing protein                                           |
| maker-2-augustus-gene-38.4-mRNA-1   | NA | NA       |           | Os02g0169300 | OsR498G0203048100.01.T02 | Phosphoglycerate kinase                                                  |
| maker-2-augustus-gene-381.38-mRNA-1 | NA | NA       |           |              |                          | zf-LSD1 domain-containing protein                                        |
| maker-2-augustus-gene-381.43-mRNA-1 | NA | NA       |           | Os08g0487300 | OsR498G0816350400.01.T01 | Transposon protein, putative, Mutator sub-class                          |
| maker-2-augustus-gene-382.60-mRNA-1 | NA | NA       |           | Os02g0810900 | OsR498G0204987500.01.T01 | NAC transcription factor                                                 |
| maker-2-augustus-gene-383.0-mRNA-1  | NA | Japonica | Kinase-TM | Os02g0811200 | OsR498G0204979300.01.T01 | Wall-associated receptor kinase 5                                        |
| maker-2-augustus-gene-385.10-mRNA-1 | NA | NA       |           | 0            | OsR498G0205002700.01.T01 | Carboxyl-terminal-processing peptidase 2                                 |
| maker-2-augustus-gene-385.34-mRNA-1 | NA | NA       |           | Os02g0815800 | OsR498G0205003000.01.T01 | EXOSC1 domain-containing protein                                         |
| maker-2-augustus-gene-385.38-mRNA-1 | NA | NA       | Kinase-TM | Os02g0815900 | OsR498G0205003400.01.T01 | Receptor-like serine/threonine-protein kinase ALE2 isoform A             |
| maker-2-augustus-gene-385.6-mRNA-1  | NA | NA       |           | Os02g0815500 | OsR498G0205002300.01.T01 | S-(hydroxymethyl)glutathione dehydrogenase                               |
| maker-2-augustus-gene-39.34-mRNA-1  | NA | NA       |           | Os02g0170100 | OsR498G0203054900.01.T01 | Glycine cleavage system H protein (Fragment)                             |

|                                      |    |          |               |              |                          |                                                                           |
|--------------------------------------|----|----------|---------------|--------------|--------------------------|---------------------------------------------------------------------------|
| maker-2-augustus-gene-390.101-mRNA-1 | NA | NA       |               | Os02g0825650 |                          |                                                                           |
| maker-2-augustus-gene-390.78-mRNA-1  | NA | Japonica |               | Os02g0825100 | OsR498G0205036400.01.T01 | F-box domain-containing protein                                           |
| maker-2-augustus-gene-390.95-mRNA-1  | NA | NA       |               |              |                          | Transposon protein, putative, unclassified                                |
| maker-2-augustus-gene-390.97-mRNA-1  | NA | NA       |               |              |                          | Signal peptide peptidase                                                  |
| maker-2-augustus-gene-390.99-mRNA-1  | NA | NA       |               | 0            | OsR498G0203543000.01.T01 | Plasma membrane ATPase                                                    |
| maker-2-augustus-gene-391.24-mRNA-1  | NA | NA       |               |              |                          | HAT family dimerisation domain containing protein                         |
| maker-2-augustus-gene-393.45-mRNA-1  | NA | NA       |               | Os02g0815500 | OsR498G0205002300.01.T01 | S-(hydroxymethyl)glutathione dehydrogenase                                |
| maker-2-augustus-gene-393.49-mRNA-1  | NA | NA       |               | 0            | OsR498G0205002700.01.T01 | Carboxyl-terminal-processing peptidase 2                                  |
| maker-2-augustus-gene-393.7-mRNA-1   | NA | Indica   |               | Os02g0831100 | OsR498G0205050700.01.T01 | Zinc finger CCH domain-containing protein 19                              |
| maker-2-augustus-gene-393.90-mRNA-1  | NA | NA       |               | Os02g0815800 | OsR498G0205003000.01.T01 | EXOSC1 domain-containing protein                                          |
| maker-2-augustus-gene-4.0-mRNA-1     | NA | NA       |               | Os02g0106700 | OsR498G0202818900.01.T04 | Zinc finger with UFM1-specific peptidase domain protein isoform X1        |
| maker-2-augustus-gene-4.11-mRNA-1    | NA | NA       |               |              |                          |                                                                           |
| maker-2-augustus-gene-4.13-mRNA-1    | NA | NA       |               | 0            | OsR498G0202820900.01.T02 | Diphosphomevalonate decarboxylase                                         |
| maker-2-augustus-gene-4.19-mRNA-1    | NA | NA       | Kinase-TM     | Os02g0106900 | OsR498G0202819600.01.T01 | Senescence-induced receptor-like serine/threonine-protein kinase          |
| maker-2-augustus-gene-4.2-mRNA-1     | NA | NA       |               | Os02g0106800 | OsR498G0202819300.01.T03 | transmembrane protein 120 homolog                                         |
| maker-2-augustus-gene-4.8-mRNA-1     | NA | NA       |               | 0            | OsR498G0202820500.01.T01 | U5 small nuclear ribonucleoprotein kDa helicase                           |
| maker-2-augustus-gene-40.27-mRNA-1   | NA | NA       |               |              |                          | Knot1 domain-containing protein (Fragment)                                |
| maker-2-augustus-gene-40.36-mRNA-1   | NA | NA       |               | Os02g0173500 | OsR498G0203065100.01.T06 | Choline-phosphate cytidyltransferase B                                    |
| maker-2-augustus-gene-40.48-mRNA-1   | NA | NA       |               | Os02g0172600 | OsR498G0203061200.01.T02 | Copper-transporting ATPase RAN1                                           |
| maker-2-augustus-gene-40.59-mRNA-1   | NA | NA       |               | Os02g0173800 | OsR498G0203065800.01.T01 | ALA-interacting subunit                                                   |
| maker-2-augustus-gene-41.0-mRNA-1    | NA | NA       |               | 0            | OsR498G0203066100.01.T01 | Succinate-semialdehyde dehydrogenase                                      |
| maker-2-augustus-gene-41.16-mRNA-1   | NA | NA       |               | Os02g0174800 | OsR498G0203069700.01.T02 | FLZ-type domain-containing protein                                        |
| maker-2-augustus-gene-41.18-mRNA-1   | NA | Japonica |               | Os02g0175100 | OsR498G0203070500.01.T04 | Basic-leucine zipper domain                                               |
| maker-2-augustus-gene-41.23-mRNA-1   | NA | NA       |               | Os02g0175400 | OsR498G0203071300.01.T01 | V-ATPase 69 kDa subunit                                                   |
| maker-2-augustus-gene-41.29-mRNA-1   | NA | NA       |               | Os02g0175500 | OsR498G0203071500.01.T01 | Core-2/I-branching beta-16-N-acetylglucosaminyltransferase family protein |
| maker-2-augustus-gene-41.34-mRNA-1   | NA | NA       |               | Os02g0174000 | OsR498G0203067000.01.T01 | HTH myb-type domain-containing protein (Fragment)                         |
| maker-2-augustus-gene-41.39-mRNA-1   | NA | NA       |               |              |                          | Leucine zipper protein-like                                               |
| maker-2-augustus-gene-41.41-mRNA-1   | NA | NA       |               | Os02g0175700 | OsR498G0203072200.01.T01 | ENTH domain-containing protein (Fragment)                                 |
| maker-2-augustus-gene-41.43-mRNA-1   | NA | NA       |               | Os02g0175900 | OsR498G0203073000.01.T01 | Proline-rich protein PRCC                                                 |
| maker-2-augustus-gene-42.26-mRNA-1   | NA | NA       | Kinase-LRR-TM | Os02g0176100 | OsR498G0203075000.01.T09 | Protein STRUBBELIG-RECEPTOR FAMILY 1                                      |
| maker-2-augustus-gene-44.20-mRNA-1   | NA | NA       |               | 0            | OsR498G0203089400.01.T01 | TUB transcription factor                                                  |
| maker-2-augustus-gene-44.24-mRNA-1   | NA | Indica   |               | Os02g0179800 | OsR498G0203090200.01.T01 | ATG11 domain-containing protein                                           |
| maker-2-augustus-gene-44.8-mRNA-1    | NA | NA       |               | Os02g0179300 | OsR498G0203089100.01.T01 | Ubiquitin receptor RAD23                                                  |
| maker-2-augustus-gene-45.28-mRNA-1   | NA | NA       |               | Os02g0180000 | OsR498G0203090900.01.T02 | Protein-serine/threonine phosphatase                                      |
| maker-2-augustus-gene-45.39-mRNA-1   | NA | NA       |               | Os02g0180700 | OsR498G0203093300.01.T01 | Nucleoside-diphosphate-sugar epimerase                                    |
| maker-2-augustus-gene-45.42-mRNA-1   | NA | NA       |               | Os02g0181300 | OsR498G0203096300.01.T06 | Transcription factor WRKY                                                 |
| maker-2-augustus-gene-46.29-mRNA-1   | NA | NA       |               | Os02g0181800 | OsR498G0203098300.01.T01 | Ubiquitin fusion degradation protein 1                                    |
| maker-2-augustus-gene-46.34-mRNA-1   | NA | NA       |               | Os02g0182700 | OsR498G0203102700.01.T01 |                                                                           |
| maker-2-augustus-gene-46.41-mRNA-1   | NA | NA       |               | 0            | OsR498G0203098600.01.T01 | Chaperone protein like                                                    |
| maker-2-augustus-gene-46.44-mRNA-1   | NA | NA       |               | Os02g0182100 | OsR498G0203099000.01.T01 | Two-component response regulator                                          |
| maker-2-augustus-gene-46.50-mRNA-1   | NA | NA       | Kinase-TM     | 0            | OsR498G0203101600.01.T02 | Phytosulfokine receptor                                                   |
| maker-2-augustus-gene-46.56-mRNA-1   | NA | NA       |               | 0            | OsR498G1119556100.01.T01 | Transposon protein, putative, Mutator sub-class                           |
| maker-2-augustus-gene-46.59-mRNA-1   | NA | Indica   |               | Os02g0182900 | OsR498G0203103600.01.T05 | BRCA1-associated protein isoform B                                        |
| maker-2-augustus-gene-47.34-mRNA-1   | NA | NA       |               | Os02g0183500 |                          | Plasma membrane fusion protein                                            |
| maker-2-augustus-gene-47.47-mRNA-1   | NA | NA       |               | Os02g0183000 | OsR498G0203104200.01.T01 | PLATZ transcription factor (Fragment)                                     |
| maker-2-augustus-gene-48.52-mRNA-1   | NA | NA       |               | Os02g0185300 | OsR498G0203112700.01.T01 | Premnaspirodiene oxygenase                                                |
| maker-2-augustus-gene-48.61-mRNA-1   | NA | Indica   |               | Os02g0186100 | OsR498G0203113700.01.T01 | Premnaspirodiene oxygenase                                                |
| maker-2-augustus-gene-48.67-mRNA-1   | NA | NA       |               | Os02g0186400 | OsR498G0203115400.01.T01 | Citron Rho-interacting kinase-like                                        |
| maker-2-augustus-gene-48.69-mRNA-1   | NA | NA       | Kinase        | Os02g0186500 | OsR498G0203116200.01.T02 | Mitogen-activated protein kinase kinase kinase                            |
| maker-2-augustus-gene-49.45-mRNA-1   | NA | NA       |               | Os02g0187600 | OsR498G0203119500.01.T01 | Protein TIC 21, chloroplastic isoform A                                   |
| maker-2-augustus-gene-49.53-mRNA-1   | NA | NA       |               | 0            | OsR498G0203118400.01.T03 | SNARE associated Golgi protein family                                     |
| maker-2-augustus-gene-49.57-mRNA-1   | NA | Indica   |               | Os02g0187400 | OsR498G0203118600.01.T01 | Glycerophosphodiester phosphodiesterase                                   |
| maker-2-augustus-gene-5.0-mRNA-1     | NA | Japonica |               | Os02g0108700 | OsR498G0202827500.01.T04 | DEAD-box ATP-dependent RNA helicase ISE2, chloroplastic                   |
| maker-2-augustus-gene-5.10-mRNA-1    | NA | Indica   |               | Os02g0109400 | OsR498G0202829400.01.T01 | Transcription factor jumonji (JmjC) domain-containing protein             |
| maker-2-augustus-gene-5.16-mRNA-1    | NA | NA       |               | Os02g0110000 | OsR498G0202831400.01.T01 | GDSL esterase/lipase                                                      |
| maker-2-augustus-gene-5.18-mRNA-1    | NA | NA       |               | 0            | OsR498G0202832000.01.T01 | CCT domain-containing protein                                             |
| maker-2-augustus-gene-5.3-mRNA-1     | NA | NA       |               | 0            | OsR498G0202831100.01.T04 |                                                                           |
| maker-2-augustus-gene-5.5-mRNA-1     | NA | NA       |               | 0            | OsR498G0202828600.01.T05 | Diphosphomevalonate decarboxylase                                         |
| maker-2-augustus-gene-50.38-mRNA-1   | NA | NA       |               | Os02g0189300 | OsR498G0203127100.01.T02 | GDSL esterase/lipase                                                      |
| maker-2-augustus-gene-50.40-mRNA-1   | NA | NA       |               | 0            | OsR498G0203129100.01.T01 | HTH myb-type domain-containing protein                                    |
| maker-2-augustus-gene-50.45-mRNA-1   | NA | Japonica |               | Os02g0189800 | OsR498G0203130400.01.T02 | Putative multidrug resistance protein                                     |

|                                    |    |          |               |              |                          |                                                                           |
|------------------------------------|----|----------|---------------|--------------|--------------------------|---------------------------------------------------------------------------|
| maker-2-augustus-gene-50.47-mRNA-1 | NA | Indica   |               | Os02g0190000 | OsR498G0203129800.01.T01 | Putative multidrug resistance protein                                     |
| maker-2-augustus-gene-55.31-mRNA-1 | NA | NA       |               | Os02g0196600 | OsR498G0203152500.01.T04 | Putative P-type ATPase, Heavy metal-associated domain, copper ion-binding |
| maker-2-augustus-gene-55.35-mRNA-1 | NA | NA       |               | Os02g0196700 | OsR498G0203152700.01.T01 | Group 13 allergen Sor h 13.01                                             |
| maker-2-augustus-gene-55.69-mRNA-1 | NA | NA       |               | 0            | OsR498G0203156200.01.T01 | LipT                                                                      |
| maker-2-augustus-gene-55.71-mRNA-1 | NA | NA       |               | 0            | OsR498G0203156400.01.T03 | Ultraviolet-B receptor like                                               |
| maker-2-augustus-gene-56.16-mRNA-1 | NA | NA       |               | 0            | OsR498G0203159400.01.T02 |                                                                           |
| maker-2-augustus-gene-56.19-mRNA-1 | NA | NA       |               | Os02g0198700 | OsR498G0203160400.01.T01 | Subtilisin-like serine protease                                           |
| maker-2-augustus-gene-56.23-mRNA-1 | NA | NA       |               | Os02g0199300 | OsR498G0203163200.01.T01 | Peptidylprolyl isomerase                                                  |
| maker-2-augustus-gene-56.29-mRNA-1 | NA | NA       |               | Os02g0199800 | OsR498G0203165000.01.T01 | C2 and GRAM domain-containing protein (Fragment)                          |
| maker-2-augustus-gene-56.33-mRNA-1 | NA | NA       |               | Os02g0199900 | OsR498G0203165400.01.T01 | 26S proteasome regulatory particle triple-A ATPase subunit4               |
| maker-2-augustus-gene-56.6-mRNA-1  | NA | NA       |               | Os02g0199500 | OsR498G0203163700.01.T01 | F-box domain-containing protein                                           |
| maker-2-augustus-gene-56.7-mRNA-1  | NA | NA       |               |              |                          | Phosphatidylinositol transfer protein SEC14                               |
| maker-2-augustus-gene-57.32-mRNA-1 | NA | Indica   |               | Os02g0200800 | OsR498G0203167900.01.T02 | TPX2 domain-containing protein (Fragment)                                 |
| maker-2-augustus-gene-57.40-mRNA-1 | NA | NA       |               | Os02g0200300 | OsR498G0203166800.01.T01 | (1->3)-beta-glucan endohydrolase                                          |
| maker-2-augustus-gene-57.42-mRNA-1 | NA | NA       |               | 0            | OsR498G0203167600.01.T01 | Acid phosphatase                                                          |
| maker-2-augustus-gene-57.44-mRNA-1 | NA | Indica   |               | Os02g0200900 | OsR498G0203168200.01.T04 | EIN3-binding F-box protein 1                                              |
| maker-2-augustus-gene-64.42-mRNA-1 | NA | NA       |               | Os02g0213400 | OsR498G0203211700.01.T06 | Di-glucose binding protein with Kinesin motor domain                      |
| maker-2-augustus-gene-64.45-mRNA-1 | NA | NA       |               | Os02g0212600 |                          |                                                                           |
| maker-2-augustus-gene-64.48-mRNA-1 | NA | NA       |               | Os02g0213100 |                          |                                                                           |
| maker-2-augustus-gene-64.50-mRNA-1 | NA | Indica   |               | Os09g0120033 | OsR498G0202840400.01.T01 |                                                                           |
| maker-2-augustus-gene-65.41-mRNA-1 | NA | NA       |               | Os02g0214900 | OsR498G0203218700.01.T02 | Histone deacetylase                                                       |
| maker-2-augustus-gene-68.23-mRNA-1 | NA | Japonica |               | Os02g0221100 | OsR498G0203235600.01.T01 | BHLH domain-containing protein (Fragment)                                 |
| maker-2-augustus-gene-69.24-mRNA-1 | NA | Indica   |               | Os02g0221300 | OsR498G0203236700.01.T02 | Putative eukaryotic initiation factor 4A-2                                |
| maker-2-augustus-gene-69.27-mRNA-1 | NA | Indica   |               | Os02g0221300 | OsR498G0203236700.01.T02 | Putative eukaryotic initiation factor 4A-2                                |
| maker-2-augustus-gene-7.12-mRNA-1  | NA | NA       |               | Os02g0113800 | OsR498G0202840900.01.T02 | DUF1618 domain-containing protein (Fragment)                              |
| maker-2-augustus-gene-7.14-mRNA-1  | NA | Japonica |               | Os02g0113900 | OsR498G0202839700.01.T01 |                                                                           |
| maker-2-augustus-gene-7.21-mRNA-1  | NA | NA       |               | 0            | OsR498G0202841400.01.T01 | ATP-dependent helicase BRM                                                |
| maker-2-augustus-gene-71.5-mRNA-1  | NA | NA       |               | Os02g0224400 |                          | Metallopeptidase M24 family protein isoform 1                             |
| maker-2-augustus-gene-72.13-mRNA-1 | NA | NA       |               | 0            | OsR498G0203259900.01.T01 | Mitochondrial carrier protein CoAc2                                       |
| maker-2-augustus-gene-72.16-mRNA-1 | NA | Indica   |               | Os02g0226600 | OsR498G0203260900.01.T03 | Homeobox domain-containing protein (Fragment)                             |
| maker-2-augustus-gene-73.0-mRNA-1  | NA | NA       |               | Os02g0226900 | OsR498G0203262700.01.T05 | ABA Overly-Sensitive 5                                                    |
| maker-2-augustus-gene-73.12-mRNA-1 | NA | Indica   |               | Os02g0227100 | OsR498G0203263200.01.T03 | Oxidative stress 3                                                        |
| maker-2-augustus-gene-73.14-mRNA-1 | NA | Indica   |               | Os02g0227200 | OsR498G0203263400.01.T01 | Early nodulin                                                             |
| maker-2-augustus-gene-73.17-mRNA-1 | NA | NA       | Kinase-TM     | 0            | OsR498G0203266600.01.T01 | Receptor-like protein kinase HSL1                                         |
| maker-2-augustus-gene-73.19-mRNA-1 | NA | NA       |               | Os01g0265300 |                          | Transposable element protein, putative, MuDR                              |
| maker-2-augustus-gene-73.2-mRNA-1  | NA | Indica   |               | Os02g0227000 | OsR498G0203262900.01.T04 | Haloacid dehalogenase-like hydrolase-like                                 |
| maker-2-augustus-gene-73.8-mRNA-1  | NA | Indica   |               | Os02g0227400 | OsR498G0203263700.01.T01 | Polynucleotide adenyllyltransferase                                       |
| maker-2-augustus-gene-74.43-mRNA-1 | NA | NA       | Kinase-LRR-TM | Os02g0228300 | OsR498G0203268600.01.T02 | Receptor-like protein kinase HSL1                                         |
| maker-2-augustus-gene-74.50-mRNA-1 | NA | Japonica |               | Os02g0229600 | OsR498G0203272800.01.T05 | Kinesin motor domain-containing protein                                   |
| maker-2-augustus-gene-76.2-mRNA-1  | NA | Indica   |               | Os06g0157500 | OsR498G0203285700.01.T01 |                                                                           |
| maker-2-augustus-gene-76.4-mRNA-1  | NA | NA       |               | Os02g0232400 | OsR498G0203286100.01.T01 | Citrate synthase                                                          |
| maker-2-augustus-gene-8.50-mRNA-1  | NA | NA       |               | Os02g0115900 | OsR498G0202848800.01.T01 | Luminal-binding protein 4                                                 |
| maker-2-augustus-gene-8.54-mRNA-1  | NA | NA       |               | Os02g0116000 |                          | Transcription factor IIIA                                                 |
| maker-2-augustus-gene-9.0-mRNA-1   | NA | NA       |               | Os02g0116300 | OsR498G0202849700.01.T06 | Probable metal-nicotianamine transporter YSL7                             |
| maker-2-augustus-gene-9.12-mRNA-1  | NA | NA       |               | Os02g0117100 | OsR498G0202851300.01.T01 | Low PSII Accumulation 3                                                   |
| maker-2-augustus-gene-9.18-mRNA-1  | NA | NA       |               | Os02g0117200 | OsR498G0202851500.01.T06 | MIR-interacting saposin-like protein                                      |
| maker-2-augustus-gene-9.24-mRNA-1  | NA | NA       |               | Os02g0117400 | OsR498G0202851700.01.T03 | Signal peptide peptidase                                                  |
| maker-2-augustus-gene-9.32-mRNA-1  | NA | NA       |               | Os02g0117500 | OsR498G0202852100.01.T02 | Glutamate receptor                                                        |
| maker-2-augustus-gene-9.36-mRNA-1  | NA | NA       |               | Os02g0117600 | OsR498G0202852500.01.T03 | Peptidylprolyl isomerase                                                  |
| maker-2-augustus-gene-9.4-mRNA-1   | NA | NA       |               | Os02g0116500 | OsR498G0202850300.01.T02 | Glucose/ribitol dehydrogenase                                             |
| maker-2-augustus-gene-9.40-mRNA-1  | NA | NA       | CC-Kinase     | Os02g0118200 | OsR498G0202854300.01.T01 | probable serine/threonine-protein kinase PIX13                            |
| maker-2-augustus-gene-9.44-mRNA-1  | NA | NA       |               | Os02g0116400 | OsR498G0202850000.01.T01 | Probable metal-nicotianamine transporter YSL8                             |
| maker-2-augustus-gene-9.46-mRNA-1  | NA | NA       |               | Os02g0116600 | OsR498G0202850600.01.T01 | Transcription factor bHLH104                                              |
| maker-2-augustus-gene-9.51-mRNA-1  | NA | NA       |               | Os02g0116900 | OsR498G0202851200.01.T01 | RPOL4c domain-containing protein                                          |
| maker-2-augustus-gene-9.53-mRNA-1  | NA | NA       |               | Os02g0117700 | OsR498G0202852400.01.T02 | UTP--glucose-1-phosphate uridylyltransferase                              |
| maker-2-augustus-gene-9.54-mRNA-1  | NA | NA       |               | Os02g0117700 | OsR498G0202852400.01.T03 | UTP--glucose-1-phosphate uridylyltransferase                              |
| maker-2-augustus-gene-9.59-mRNA-1  | NA | NA       |               |              |                          | Autophagy protein 5                                                       |
| maker-2-augustus-gene-9.64-mRNA-1  | NA | NA       |               | Os02g0117900 | OsR498G0202853000.01.T01 | Putative PMR5 domain, PC-Esterase, protein trichome birefringence-like 12 |
| maker-2-augustus-gene-9.8-mRNA-1   | NA | NA       |               | Os02g0116800 | OsR498G0202850900.01.T01 | Remorin                                                                   |
| maker-2-augustus-gene-93.0-mRNA-1  | NA | NA       |               | Os02g0262700 |                          | Putative bacterial blight-resistance protein Xa1                          |
| maker-2-augustus-gene-95.48-mRNA-1 | NA | Indica   |               | Os02g0265550 | OsR498G0407890300.01.T01 | Early light-inducible protein ELIP                                        |



|                                     |    |          |              |              |                          |                                                                              |
|-------------------------------------|----|----------|--------------|--------------|--------------------------|------------------------------------------------------------------------------|
| maker-2-augustus-gene-96.27-mRNA-1  | NA | NA       |              | Os02g0268100 | OsR498G0203382800.01.T01 | Glutelin type-B                                                              |
| maker-2-augustus-gene-96.29-mRNA-1  | NA | Indica   |              | Os02g0267700 | OsR498G0203383000.01.T01 | Expansin                                                                     |
| maker-3-augustus-gene-0.0-mRNA-1    | NA | NA       |              |              |                          |                                                                              |
| maker-3-augustus-gene-0.17-mRNA-1   | NA | Indica   |              | Os01g0277600 | OsR498G0305859800.01.T01 | Phospholipid-transporting ATPase                                             |
| maker-3-augustus-gene-0.21-mRNA-1   | NA | NA       |              | Os03g0206400 |                          |                                                                              |
| maker-3-augustus-gene-0.23-mRNA-1   | NA | Indica   |              | Os03g0206700 | OsR498G0305430600.01.T01 | BTB/POZ domain-containing protein At5g67385                                  |
| maker-3-augustus-gene-0.3-mRNA-1    | NA | NA       |              | Os03g0206600 | OsR498G0305430300.01.T01 |                                                                              |
| maker-3-augustus-gene-0.5-mRNA-1    | NA | NA       |              | Os03g0206900 | OsR498G0305430700.01.T01 | E3 ubiquitin-protein ligase RLIM                                             |
| maker-3-augustus-gene-0.7-mRNA-1    | NA | NA       |              | Os03g0100400 | OsR498G0305067700.01.T03 | DNA repair endonuclease                                                      |
| maker-3-augustus-gene-0.8-mRNA-1    | NA | NA       |              | Os03g0100400 | OsR498G0305067700.01.T03 | DNA repair endonuclease                                                      |
| maker-3-augustus-gene-10.46-mRNA-1  | NA | NA       |              |              |                          | Transposon protein, putative, Mutator sub-class, expressed                   |
| maker-3-augustus-gene-100.22-mRNA-1 | NA | NA       |              | Os03g0294900 | OsR498G0305748000.01.T01 | E1 ubiquitin-activating enzyme                                               |
| maker-3-augustus-gene-115.26-mRNA-1 | NA | Indica   |              | Os03g0323200 | OsR498G0305849500.01.T01 | Magnesium chelatase                                                          |
| maker-3-augustus-gene-115.29-mRNA-1 | NA | NA       |              | Os03g0323500 | OsR498G0305850500.01.T03 | Arf-GAP domain-containing protein                                            |
| maker-3-augustus-gene-115.35-mRNA-1 | NA | NA       |              | Os03g0323800 | OsR498G0305852100.01.T02 | Mitochondrial import receptor subunit TOM40-1, N-terminally processed lik    |
| maker-3-augustus-gene-115.41-mRNA-1 | NA | NA       |              | 0            | OsR498G1120618500.01.T01 |                                                                              |
| maker-3-augustus-gene-116.30-mRNA-1 | NA | NA       |              | Os03g0100300 | OsR498G0305067500.01.T01 | Peptidylprolyl isomerase                                                     |
| maker-3-augustus-gene-116.35-mRNA-1 | NA | NA       |              | Os03g0100400 | OsR498G0305067700.01.T02 | DNA repair endonuclease                                                      |
| maker-3-augustus-gene-116.40-mRNA-1 | NA | NA       |              | Os10g0316400 | OsR498G1018414400.01.T01 |                                                                              |
| maker-3-augustus-gene-117.30-mRNA-1 | NA | NA       |              | 0            | OsR498G0305067900.01.T05 | tRNA/rRNA methyltransferase (SpoU) family protein                            |
| maker-3-augustus-gene-117.37-mRNA-1 | NA | NA       |              | Os03g0100800 | OsR498G0305068300.01.T03 | Plasma membrane ATPase                                                       |
| maker-3-augustus-gene-117.44-mRNA-1 | NA | NA       |              | Os03g0100900 | OsR498G0305068500.01.T03 | DUF862 domain-containing protein                                             |
| maker-3-augustus-gene-117.47-mRNA-1 | NA | NA       |              | Os03g0101100 | OsR498G0305068900.01.T07 | Palmitoyl protein thioesterase containing protein, expressed                 |
| maker-3-augustus-gene-117.52-mRNA-1 | NA | NA       |              | Os03g0101900 | OsR498G0305070900.01.T01 | Phosphatidylserine decarboxylase                                             |
| maker-3-augustus-gene-117.55-mRNA-1 | NA | NA       |              | Os03g0102100 | OsR498G0305070900.01.T08 | Formyl transferase family protein, expressed                                 |
| maker-3-augustus-gene-117.60-mRNA-1 | NA | NA       |              | 0            | OsR498G0305071500.01.T05 | Transcriptional regulator, putative, expressed                               |
| maker-3-augustus-gene-117.69-mRNA-1 | NA | Japonica |              | Os03g0101000 | OsR498G0202858300.01.T01 | Acetatebutyrate--coa ligase aae7, peroxisomal                                |
| maker-3-augustus-gene-117.71-mRNA-1 | NA | NA       | CC-Kinase-TM | Os03g0101200 | OsR498G0305069200.01.T01 | E3 ubiquitin ligase                                                          |
| maker-3-augustus-gene-117.76-mRNA-1 | NA | NA       |              | Os03g0101300 | OsR498G0305069400.01.T01 | Hexose carrier protein HEX6                                                  |
| maker-3-augustus-gene-117.78-mRNA-1 | NA | NA       |              | Os03g0101500 | OsR498G0305069800.01.T01 | Ubiquitin-associated and SH3 domain-containing protein                       |
| maker-3-augustus-gene-117.81-mRNA-1 | NA | Indica   |              | Os03g0101600 | OsR498G0305070000.01.T01 | Oxidoreductase, zinc-binding dehydrogenase family protein, expressed         |
| maker-3-augustus-gene-117.84-mRNA-1 | NA | NA       |              | Os03g0101700 | OsR498G0305070200.01.T03 | Helicase ATP-binding domain-containing protein                               |
| maker-3-augustus-gene-117.91-mRNA-1 | NA | Indica   |              | Os03g0102400 | OsR498G0714254900.01.T02 | 2-phosphoglycerate kinase, putative, expressed                               |
| maker-3-augustus-gene-118.34-mRNA-1 | NA | NA       |              | Os03g0102700 | OsR498G0305073700.01.T01 | Beta-expansin 1a                                                             |
| maker-3-augustus-gene-118.36-mRNA-1 | NA | Indica   |              | Os08g0155400 | OsR498G0305075700.01.T01 | Solute carrier family 15 (Peptide/histidine transporter), member 3/4         |
| maker-3-augustus-gene-120.0-mRNA-1  | NA | NA       |              | Os10g0559900 | OsR498G1019191100.01.T01 | Ribosomal protein L18/L5                                                     |
| maker-3-augustus-gene-120.12-mRNA-1 | NA | NA       |              | Os10g0558700 | OsR498G1019186800.01.T05 | S-norocclaurine synthase 1                                                   |
| maker-3-augustus-gene-120.15-mRNA-1 | NA | NA       |              | Os10g0558700 | OsR498G1019187400.01.T01 | S-norocclaurine synthase 1                                                   |
| maker-3-augustus-gene-120.19-mRNA-1 | NA | NA       |              | Os10g0559200 | OsR498G1019186800.01.T05 | Oxidoreductase, 2OG-Fe oxygenase family protein, expressed                   |
| maker-3-augustus-gene-120.2-mRNA-1  | NA | NA       |              | Os10g0560000 | OsR498G1019191700.01.T01 | VAN3-binding protein (Fragment)                                              |
| maker-3-augustus-gene-120.21-mRNA-1 | NA | NA       |              | Os10g0559500 | OsR498G1019190000.01.T01 | S-norocclaurine synthase 1                                                   |
| maker-3-augustus-gene-120.23-mRNA-1 | NA | NA       |              | Os10g0559700 | OsR498G1019190200.01.T03 | Agenet-like domain-containing protein                                        |
| maker-3-augustus-gene-120.31-mRNA-1 | NA | NA       |              | Os10g0559800 | OsR498G1019190600.01.T01 | Electron transporter                                                         |
| maker-3-augustus-gene-120.37-mRNA-1 | NA | NA       |              | 0            | OsR498G1019191600.01.T02 |                                                                              |
| maker-3-augustus-gene-120.4-mRNA-1  | NA | NA       |              | Os10g0558200 | OsR498G1019184400.01.T01 | S-norocclaurine synthase 1-like isoform X2                                   |
| maker-3-augustus-gene-120.41-mRNA-1 | NA | NA       |              | Os10g0560200 | OsR498G1019192600.01.T01 | Cell number regulator like                                                   |
| maker-3-augustus-gene-120.6-mRNA-1  | NA | NA       |              | Os10g0558400 | OsR498G1019186200.01.T01 | S-norocclaurine synthase 1-like isoform X2                                   |
| maker-3-augustus-gene-120.9-mRNA-1  | NA | NA       |              | Os10g0558700 | OsR498G1019186800.01.T01 | Putative ethylene-forming enzyme                                             |
| maker-3-augustus-gene-121.10-mRNA-1 | NA | NA       |              | Os10g0561300 | OsR498G1019196500.01.T01 | Hexose transporter                                                           |
| maker-3-augustus-gene-121.13-mRNA-1 | NA | NA       | CC-Kinase-TM | Os10g0561500 | OsR498G1019196900.01.T01 | E3 ubiquitin ligase                                                          |
| maker-3-augustus-gene-121.18-mRNA-1 | NA | NA       |              | Os10g0561800 | OsR498G1019198700.01.T01 | Homeobox-leucine zipper protein HAT4                                         |
| maker-3-augustus-gene-121.2-mRNA-1  | NA | NA       |              | Os10g0560900 | OsR498G1019195100.01.T01 | Biotin F                                                                     |
| maker-3-augustus-gene-121.20-mRNA-1 | NA | NA       |              | Os10g0560400 | OsR498G1019192800.01.T01 | CCT motif family protein, expressed                                          |
| maker-3-augustus-gene-121.31-mRNA-1 | NA | NA       |              | Os10g0561000 |                          |                                                                              |
| maker-3-augustus-gene-121.33-mRNA-1 | NA | NA       |              | Os10g0561200 | OsR498G1019196400.01.T01 | O-fucosyltransferase family protein (Fragment)                               |
| maker-3-augustus-gene-121.35-mRNA-1 | NA | NA       |              | Os10g0561400 | OsR498G1019196800.01.T01 | HTH myb-type domain-containing protein                                       |
| maker-3-augustus-gene-121.38-mRNA-1 | NA | NA       |              | Os10g0561900 | OsR498G1019199800.01.T01 | Dual specificity phosphatase, catalytic domain containing protein, expressed |
| maker-3-augustus-gene-121.8-mRNA-1  | NA | NA       |              | Os10g0561100 | OsR498G1019196100.01.T01 | Oxidoreductase, zinc-binding dehydrogenase family protein, expressed         |
| maker-3-augustus-gene-122.0-mRNA-1  | NA | NA       | Kinase-TM    | Os10g0562500 | OsR498G1019201900.01.T03 | Serine/threonine-protein kinase D6PKL2                                       |
| maker-3-augustus-gene-122.11-mRNA-1 | NA | NA       | Kinase-TM    | Os10g0563500 | OsR498G1019206100.01.T02 | Serine/threonine-protein kinase cdc7                                         |
| maker-3-augustus-gene-122.15-mRNA-1 | NA | NA       |              | Os10g0563600 | OsR498G1019206300.01.T01 | Peptide methionine sulfoxide reductase A4, chloroplastic                     |

|                                     |    |        |           |              |                          |                                                                           |
|-------------------------------------|----|--------|-----------|--------------|--------------------------|---------------------------------------------------------------------------|
| maker-3-augustus-gene-122.18-mRNA-1 | NA | NA     |           | Os10g0562100 | OsR498G1019201200.01.T02 | Transcription factor MYBS2                                                |
| maker-3-augustus-gene-122.2-mRNA-1  | NA | NA     |           | Os10g0563000 | OsR498G1019204300.01.T04 | Palmitoyl protein thioesterase containing protein, expressed              |
| maker-3-augustus-gene-122.22-mRNA-1 | NA | NA     |           | Os10g0562700 | OsR498G1019202400.01.T01 | DUF632 domain-containing protein/DUF630 domain-containing protein         |
| maker-3-augustus-gene-122.26-mRNA-1 | NA | NA     |           | Os10g0563200 | OsR498G1019205600.01.T02 | Protein ARABIDILLO like                                                   |
| maker-3-augustus-gene-122.32-mRNA-1 | NA | NA     |           | Os10g0563300 | OsR498G1019205800.01.T01 | WD repeat-containing protein WRAP73                                       |
| maker-3-augustus-gene-122.35-mRNA-1 | NA | NA     |           | Os10g0563700 | OsR498G1019206600.01.T01 | Nucleoside diphosphate kinase                                             |
| maker-3-augustus-gene-122.5-mRNA-1  | NA | NA     |           | Os10g0563400 | OsR498G1019205900.01.T01 | Cytospin-B like                                                           |
| maker-3-augustus-gene-123.33-mRNA-1 | NA | NA     |           | Os10g0563900 | OsR498G1019207500.01.T01 | Cyclin                                                                    |
| maker-3-augustus-gene-123.35-mRNA-1 | NA | NA     |           | 0            | OsR498G1019207900.01.T01 | Poly(RC)-binding protein 1-like                                           |
| maker-3-augustus-gene-123.39-mRNA-1 | NA | NA     |           | Os12g0162400 | OsR498G1019209900.01.T01 | Calcineurin B 01                                                          |
| maker-3-augustus-gene-123.43-mRNA-1 | NA | NA     |           | Os10g0564900 | OsR498G1019210100.01.T02 | Casein kinase II subunit beta                                             |
| maker-3-augustus-gene-123.47-mRNA-1 | NA | NA     |           | Os10g0565000 | OsR498G1019210300.01.T01 | ICE-like protease p20 domain containing protein, expressed                |
| maker-3-augustus-gene-123.49-mRNA-1 | NA | NA     |           | 0            | OsR498G1019210500.01.T02 | zf-LSD1 domain-containing protein                                         |
| maker-3-augustus-gene-123.53-mRNA-1 | NA | NA     |           | Os10g0564100 | OsR498G1019208200.01.T01 | Mediator of RNA polymerase II transcription subunit 31                    |
| maker-3-augustus-gene-123.57-mRNA-1 | NA | NA     |           | Os10g0564400 | OsR498G1019209400.01.T01 | Phospho-2-dehydro-3-deoxyheptonate aldolase                               |
| maker-3-augustus-gene-123.59-mRNA-1 | NA | NA     | Kinase-TM | Os10g0564500 | OsR498G1120703600.01.T02 | Serinethreonine-protein kinase sapk3                                      |
| maker-3-augustus-gene-123.65-mRNA-1 | NA | NA     |           | Os10g0565200 | OsR498G1019210800.01.T02 | Beta-amylase                                                              |
| maker-3-augustus-gene-123.69-mRNA-1 | NA | NA     |           |              |                          | SHR-BD domain-containing protein                                          |
| maker-3-augustus-gene-124.32-mRNA-1 | NA | NA     |           | Os10g0565600 | OsR498G1019214900.01.T05 | E3 ubiquitin protein ligase                                               |
| maker-3-augustus-gene-124.38-mRNA-1 | NA | NA     |           | 0            | OsR498G1019215500.01.T01 | Helicase ATP-binding domain-containing protein                            |
| maker-3-augustus-gene-124.40-mRNA-1 | NA | NA     |           | Os10g0565700 |                          | Putative transcription factor                                             |
| maker-3-augustus-gene-124.42-mRNA-1 | NA | NA     |           | 0            | OsR498G1019215900.01.T03 | Helicase ATP-binding domain-containing protein                            |
| maker-3-augustus-gene-124.46-mRNA-1 | NA | NA     |           | Os10g0566201 | OsR498G1019217100.01.T01 | DOG1 domain-containing protein (Fragment)                                 |
| maker-3-augustus-gene-124.48-mRNA-1 | NA | NA     |           | Os10g0566700 | OsR498G1019219100.01.T01 | Chaperonin 1, chloroplastic                                               |
| maker-3-augustus-gene-124.53-mRNA-1 | NA | NA     |           | 0            | OsR498G1019219700.01.T04 | Pentatricopeptide repeat (PPR) superfamily protein                        |
| maker-3-augustus-gene-124.60-mRNA-1 | NA | NA     |           | Os10g0566800 | OsR498G1019219400.01.T01 | Peroxidase                                                                |
| maker-3-augustus-gene-125.0-mRNA-1  | NA | NA     |           |              |                          | SH2 domain protein B                                                      |
| maker-3-augustus-gene-125.14-mRNA-1 | NA | NA     |           | Os10g0567000 | OsR498G1019220000.01.T02 | Camphor resistance CrcB family protein                                    |
| maker-3-augustus-gene-125.17-mRNA-1 | NA | NA     |           | Os10g0567100 | OsR498G1019220400.01.T01 | Chlorophyllide a oxygenase chloroplastic                                  |
| maker-3-augustus-gene-125.19-mRNA-1 | NA | NA     |           | Os10g0567400 | OsR498G1019221000.01.T01 | Chlorophyllide a oxygenase chloroplastic                                  |
| maker-3-augustus-gene-131.51-mRNA-1 | NA | NA     |           | 0            | OsR498G1120703200.01.T01 | Transposon protein, putative, Mutator sub-class, expressed                |
| maker-3-augustus-gene-132.43-mRNA-1 | NA | NA     |           | 0            | OsR498G0305064700.01.T01 |                                                                           |
| maker-3-augustus-gene-132.46-mRNA-1 | NA | NA     |           | 0            | OsR498G0305065700.01.T01 | Peptidase M20/M25/M40 family protein isoform 1                            |
| maker-3-augustus-gene-132.60-mRNA-1 | NA | NA     |           | Os04g0218600 | OsR498G1019263000.01.T06 | Expressed protein (Fragment)                                              |
| maker-3-augustus-gene-132.73-mRNA-1 | NA | NA     |           | Os03g0100050 |                          | MSC domain-containing protein (Fragment)                                  |
| maker-3-augustus-gene-143.70-mRNA-1 | NA | NA     |           |              |                          | HAT dimerisation domain-containing protein-like                           |
| maker-3-augustus-gene-146.16-mRNA-1 | NA | NA     |           | Os10g0555600 | OsR498G1019170200.01.T02 | Beta expansin 3                                                           |
| maker-3-augustus-gene-146.18-mRNA-1 | NA | NA     |           | Os10g0555700 | OsR498G1019170400.01.T01 | Beta-expansin                                                             |
| maker-3-augustus-gene-146.20-mRNA-1 | NA | NA     |           | Os10g0555900 | OsR498G1019172000.01.T01 | Beta expansin 3                                                           |
| maker-3-augustus-gene-146.23-mRNA-1 | NA | NA     |           | Os10g0556600 | OsR498G1019174200.01.T03 | Basic helix-loop-helix transcription factor                               |
| maker-3-augustus-gene-146.3-mRNA-1  | NA | NA     |           | Os10g0556100 | OsR498G1019173700.01.T02 | Beta expansin2                                                            |
| maker-3-augustus-gene-147.29-mRNA-1 | NA | NA     |           | Os03g0294900 | OsR498G0305748000.01.T01 | E1 ubiquitin-activating enzyme                                            |
| maker-3-augustus-gene-147.31-mRNA-1 | NA | NA     |           |              |                          | Putative transcription regulatory protein                                 |
| maker-3-augustus-gene-147.38-mRNA-1 | NA | NA     |           | Os03g0294900 | OsR498G0305748000.01.T01 | E1 ubiquitin-activating enzyme                                            |
| maker-3-augustus-gene-148.0-mRNA-1  | NA | Indica |           | Os03g0323200 | OsR498G0305849500.01.T01 | Magnesium chelatase                                                       |
| maker-3-augustus-gene-148.17-mRNA-1 | NA | Indica |           | Os07g0656200 | OsR498G0305850000.01.T01 | Non-cyanogenic beta-glucosidase                                           |
| maker-3-augustus-gene-148.3-mRNA-1  | NA | NA     |           | Os03g0323500 | OsR498G0305850500.01.T03 | Arf-GAP domain-containing protein                                         |
| maker-3-augustus-gene-148.9-mRNA-1  | NA | NA     |           | Os03g0323800 | OsR498G0305852100.01.T02 | Mitochondrial import receptor subunit TOM40-1, N-terminally processed lik |
| maker-3-augustus-gene-157.37-mRNA-1 | NA | NA     |           | Os03g0339700 | OsR498G0305910100.01.T01 | DUF827 domain-containing protein (Fragment)                               |
| maker-3-augustus-gene-157.53-mRNA-1 | NA | NA     | Kinase-TM | Os03g0339900 | OsR498G0305910600.01.T02 | Non-specific serine/threonine protein kinase                              |
| maker-3-augustus-gene-157.54-mRNA-1 | NA | NA     |           |              |                          | Uroporphyrinogen decarboxylase                                            |
| maker-3-augustus-gene-158.51-mRNA-1 | NA | NA     |           | 0            | OsR498G0305923300.01.T02 | U3 small nucleolar RNA-associated protein 14 A                            |
| maker-3-augustus-gene-158.54-mRNA-1 | NA | NA     |           | Os03g0343400 | OsR498G0305923500.01.T01 | Blue-light photoreceptor                                                  |
| maker-3-augustus-gene-158.76-mRNA-1 | NA | Indica |           | Os03g0342900 | OsR498G0305921800.01.T05 | Dormancy/auxin associated protein, expressed                              |
| maker-3-augustus-gene-158.80-mRNA-1 | NA | NA     |           | Os03g0343500 | OsR498G0305923800.01.T01 | 60S ribosomal protein L22-2, putative, expressed                          |
| maker-3-augustus-gene-159.0-mRNA-1  | NA | Indica |           | Os03g0344100 | OsR498G0305925100.01.T01 | Alternative splicing regulator                                            |
| maker-3-augustus-gene-159.11-mRNA-1 | NA | NA     |           | 0            | OsR498G0305926000.01.T05 | Ubiquitin-like-specific protease ESD4                                     |
| maker-3-augustus-gene-159.18-mRNA-1 | NA | Indica |           | Os03g0344700 | OsR498G0305926800.01.T01 | AAA-type ATPase family protein, putative, expressed                       |
| maker-3-augustus-gene-159.25-mRNA-1 | NA | NA     |           | Os03g0344900 | OsR498G0305927400.01.T01 | ATP-dependent Clp protease proteolytic subunit                            |
| maker-3-augustus-gene-159.31-mRNA-1 | NA | Indica |           | Os03g0345100 | OsR498G0305928400.01.T02 | Cell cycle checkpoint control protein family                              |
| maker-3-augustus-gene-159.5-mRNA-1  | NA | Indica |           | Os03g0345200 | OsR498G0305928500.01.T02 | 40S ribosomal protein S21                                                 |

|                                     |    |          |              |              |                          |                                                                      |
|-------------------------------------|----|----------|--------------|--------------|--------------------------|----------------------------------------------------------------------|
| maker-3-augustus-gene-159.9-mRNA-1  | NA | NA       |              | 0            | OsR498G0305925400.01.T01 | Usp domain-containing protein (Fragment)                             |
| maker-3-augustus-gene-16.53-mRNA-1  | NA | NA       |              | Os03g0132000 | OsR498G0305176700.01.T01 | 4-coumarate--CoA ligase-like 4                                       |
| maker-3-augustus-gene-16.57-mRNA-1  | NA | NA       |              | Os03g0132200 | OsR498G0305177700.01.T03 |                                                                      |
| maker-3-augustus-gene-16.62-mRNA-1  | NA | NA       | CC-Kinase-TM | Os03g0132800 | OsR498G0305179900.01.T01 | serine/threonine-protein kinase BSK1                                 |
| maker-3-augustus-gene-16.66-mRNA-1  | NA | NA       |              | Os03g0132900 | OsR498G0305180300.01.T01 | Class II chitinase                                                   |
| maker-3-augustus-gene-16.68-mRNA-1  | NA | NA       |              | Os03g0133300 | OsR498G0305181300.01.T01 | Inactive purple acid phosphatase-like protein                        |
| maker-3-augustus-gene-16.81-mRNA-1  | NA | NA       |              | Os03g0132300 | OsR498G0305178200.01.T01 |                                                                      |
| maker-3-augustus-gene-16.84-mRNA-1  | NA | NA       |              | Os03g0133000 | OsR498G0305180600.01.T01 | NAC domain-containing protein 22                                     |
| maker-3-augustus-gene-16.86-mRNA-1  | NA | NA       |              | Os03g0133500 | OsR498G0305182000.01.T01 | probable acyl-activating enzyme 1, peroxisomal                       |
| maker-3-augustus-gene-16.88-mRNA-1  | NA | NA       |              | Os03g0133600 | OsR498G0305182200.01.T01 | probable acyl-activating enzyme 1, peroxisomal                       |
| maker-3-augustus-gene-16.90-mRNA-1  | NA | NA       |              | Os03g0133900 | OsR498G0305183000.01.T04 | Serine O-acetyltransferase                                           |
| maker-3-augustus-gene-160.22-mRNA-1 | NA | NA       |              | 0            | OsR498G0305936700.01.T01 | Transcription factor jumonji (JmjC) domain-containing                |
| maker-3-augustus-gene-160.27-mRNA-1 | NA | NA       |              | Os03g0346800 | OsR498G0305936900.01.T01 | Metal tolerance protein 2                                            |
| maker-3-augustus-gene-160.34-mRNA-1 | NA | NA       |              | Os03g0347200 | OsR498G0305938700.01.T03 | Nuclear cap-binding protein subunit                                  |
| maker-3-augustus-gene-160.40-mRNA-1 | NA | NA       |              | 0            | OsR498G0305931400.01.T02 | HMA domain-containing protein (Fragment)                             |
| maker-3-augustus-gene-160.43-mRNA-1 | NA | NA       |              | 0            | OsR498G0305937600.01.T01 | SANT domain-containing protein (Fragment)                            |
| maker-3-augustus-gene-160.45-mRNA-1 | NA | Indica   |              | Os03g0347300 | OsR498G0305939000.01.T05 | Cysteine-tryptophan domain-containing zinc finger protein 3          |
| maker-3-augustus-gene-161.0-mRNA-1  | NA | Indica   |              | Os03g0347800 | OsR498G0305940700.01.T02 | Peptidyl-tRNA hydrolase, mitochondrial                               |
| maker-3-augustus-gene-161.15-mRNA-1 | NA | Japonica |              | Os03g0348200 | OsR498G0305942000.01.T02 | Tau-cadinol synthase                                                 |
| maker-3-augustus-gene-161.17-mRNA-1 | NA | Indica   |              | Os07g0668700 | OsR498G0305944000.01.T01 | Alpha/beta-Hydrolases superfamily protein                            |
| maker-3-augustus-gene-161.23-mRNA-1 | NA | NA       |              | Os03g0348900 | OsR498G0305944200.01.T03 | E3 ubiquitin-protein ligase MIEL1                                    |
| maker-3-augustus-gene-161.5-mRNA-1  | NA | NA       |              | Os03g0347500 | OsR498G0305939400.01.T01 | Bidirectional sugar transporter SWEET                                |
| maker-3-augustus-gene-161.7-mRNA-1  | NA | NA       |              | Os03g0347900 | OsR498G0305941000.01.T05 | Alpha-humulene synthase                                              |
| maker-3-augustus-gene-162.0-mRNA-1  | NA | NA       |              | Os03g0351100 | OsR498G0305948100.01.T04 | Zinc finger protein CONSTANS-LIKE 13                                 |
| maker-3-augustus-gene-162.14-mRNA-1 | NA | Indica   | CC-Kinase    | Os03g0349200 | OsR498G0305945000.01.T02 | probable serine/threonine-protein kinase At1g54610                   |
| maker-3-augustus-gene-162.19-mRNA-1 | NA | NA       |              | Os03g0350100 | OsR498G0305945800.01.T02 | Nucleolar protein like                                               |
| maker-3-augustus-gene-162.23-mRNA-1 | NA | NA       |              | Os03g0350300 | OsR498G0305946800.01.T01 | Nucleolar protein like                                               |
| maker-3-augustus-gene-162.27-mRNA-1 | NA | Indica   |              | Os07g0667000 | OsR498G0305949200.01.T05 | tubby-like F-box protein 3                                           |
| maker-3-augustus-gene-162.3-mRNA-1  | NA | NA       |              | Os03g0351300 | OsR498G0305948900.01.T01 | Beta-amylase                                                         |
| maker-3-augustus-gene-162.8-mRNA-1  | NA | NA       |              | Os03g0349000 | OsR498G0305944600.01.T01 | Nuclear pore complex protein NUP93A                                  |
| maker-3-augustus-gene-166.0-mRNA-1  | NA | NA       |              | Os03g0360500 | OsR498G0305990400.01.T01 | ER membrane protein complex subunit 4                                |
| maker-3-augustus-gene-166.5-mRNA-1  | NA | NA       |              | Os11g0546000 | OsR498G1120321500.01.T01 | 68 kDa protein HP68                                                  |
| maker-3-augustus-gene-169.34-mRNA-1 | NA | NA       |              | 0            | OsR498G0305965900.01.T01 | U4/U6 small nuclear ribonucleoprotein Prp4                           |
| maker-3-augustus-gene-169.36-mRNA-1 | NA | NA       |              | 0            | OsR498G0305965900.01.T01 | U4/U6 small nuclear ribonucleoprotein Prp4                           |
| maker-3-augustus-gene-169.41-mRNA-1 | NA | NA       |              | Os03g0355600 | OsR498G0305966400.01.T02 | Beta-adaptin-like protein C                                          |
| maker-3-augustus-gene-17.38-mRNA-1  | NA | NA       |              | Os03g0134300 | OsR498G0305183700.01.T01 | ATP phosphoribosyltransferase                                        |
| maker-3-augustus-gene-17.43-mRNA-1  | NA | NA       |              |              |                          | IQ-domain 20                                                         |
| maker-3-augustus-gene-173.39-mRNA-1 | NA | NA       |              | Os05g0366600 | OsR498G0510678900.01.T01 | Non-cyanogenic beta-glucosidase                                      |
| maker-3-augustus-gene-173.41-mRNA-1 | NA | Indica   |              | Os03g0359000 | OsR498G0305987400.01.T01 | Alpha/beta-Hydrolases superfamily protein                            |
| maker-3-augustus-gene-173.56-mRNA-1 | NA | NA       |              | Os05g0366900 | OsR498G0510679400.01.T03 |                                                                      |
| maker-3-augustus-gene-173.59-mRNA-1 | NA | NA       |              | Os05g0367100 | OsR498G0510680000.01.T01 | Nucleolar protein 16                                                 |
| maker-3-augustus-gene-173.61-mRNA-1 | NA | NA       |              |              |                          |                                                                      |
| maker-3-augustus-gene-173.65-mRNA-1 | NA | NA       |              | Os05g0367400 | OsR498G0510680800.01.T01 | Thiamine pyrophosphokinase                                           |
| maker-3-augustus-gene-174.43-mRNA-1 | NA | NA       |              | 0            | OsR498G0510682500.01.T01 |                                                                      |
| maker-3-augustus-gene-174.45-mRNA-1 | NA | NA       |              | Os05g0368000 | OsR498G0510682900.01.T01 | NRR repressor 1                                                      |
| maker-3-augustus-gene-174.46-mRNA-1 | NA | NA       |              | Os05g0368300 | OsR498G0510685100.01.T01 | S4 RNA-binding domain-containing protein (Fragment)                  |
| maker-3-augustus-gene-174.49-mRNA-1 | NA | NA       |              | Os05g0368600 | OsR498G0510686600.01.T03 | Pro-resilin                                                          |
| maker-3-augustus-gene-175.0-mRNA-1  | NA | NA       |              |              |                          | HEAT repeat family protein, expressed                                |
| maker-3-augustus-gene-175.17-mRNA-1 | NA | NA       |              | Os03g0360500 | OsR498G0305990400.01.T01 | ER membrane protein complex subunit 4                                |
| maker-3-augustus-gene-177.17-mRNA-1 | NA | NA       |              | Os03g0365200 | OsR498G0306004300.01.T01 | Ulp1 protease family, C-terminal catalytic domain containing protein |
| maker-3-augustus-gene-182.17-mRNA-1 | NA | Indica   |              | Os07g0633400 | OsR498G0306033000.01.T01 | IQ domain-containing protein IQM2                                    |
| maker-3-augustus-gene-182.20-mRNA-1 | NA | Japonica |              | Os03g0374575 | OsR498G0306035000.01.T01 | Splicing factor, arginine/serine-rich 4                              |
| maker-3-augustus-gene-182.5-mRNA-1  | NA | NA       |              | Os03g0374400 | OsR498G0306032700.01.T01 | TVP38/TMEM64 family membrane protein like                            |
| maker-3-augustus-gene-183.29-mRNA-1 | NA | NA       |              | Os03g0374600 | OsR498G0306035500.01.T01 | Glucan endo-1,3-beta-D-glucosidase                                   |
| maker-3-augustus-gene-183.36-mRNA-1 | NA | Indica   |              | Os03g0375100 | OsR498G0306036800.01.T01 | Amino acid permease family protein, putative, expressed              |
| maker-3-augustus-gene-183.39-mRNA-1 | NA | NA       |              | 0            | OsR498G0306039800.01.T01 | Cystine/glutamate transporter (Fragment)                             |
| maker-3-augustus-gene-183.41-mRNA-1 | NA | NA       |              | Os03g0376000 | OsR498G0306040400.01.T02 | Transmembrane emp24 domain-containing protein 10                     |
| maker-3-augustus-gene-183.43-mRNA-1 | NA | Indica   |              | Os03g0376100 | OsR498G0306040800.01.T01 | Cystathionine gamma-synthase                                         |
| maker-3-augustus-gene-185.10-mRNA-1 | NA | NA       |              | Os03g0379400 | OsR498G0306048800.01.T01 | RNA replicase polyprotein                                            |
| maker-3-augustus-gene-185.6-mRNA-1  | NA | NA       |              | 0            | OsR498G0306049500.01.T01 | Disease resistance protein RPM1                                      |
| maker-3-augustus-gene-185.7-mRNA-1  | NA | Indica   | NBS-TM       | Os07g0501500 | OsR498G0306049500.01.T01 | Disease resistance protein RPM1                                      |

|                                     |    |          |            |              |                          |                                                                          |
|-------------------------------------|----|----------|------------|--------------|--------------------------|--------------------------------------------------------------------------|
| maker-3-augustus-gene-186.0-mRNA-1  | NA | NA       |            | Os03g0380600 |                          | Transposon protein, putative, CACTA, En/Spm sub-class                    |
| maker-3-augustus-gene-186.13-mRNA-1 | NA | NA       |            | Os08g0487300 | OsR498G0816350400.01.T01 | Transposon protein, putative, Mutator sub-class                          |
| maker-3-augustus-gene-188.43-mRNA-1 | NA | Japonica |            | Os03g0384900 | OsR498G0306060200.01.T01 |                                                                          |
| maker-3-augustus-gene-190.11-mRNA-1 | NA | NA       |            | Os03g0388800 | OsR498G0306078100.01.T01 | 2-hydroxy-6-oxononadienedioate/2-hydroxy-6-oxononatrienedioate hydrolase |
| maker-3-augustus-gene-190.22-mRNA-1 | NA | Indica   |            | Os03g0388900 | OsR498G0306078400.01.T01 | Putative metacaspase, having alternative splicing products               |
| maker-3-augustus-gene-190.25-mRNA-1 | NA | Japonica |            | Os03g0389000 | OsR498G0306080600.01.T01 | Metacaspase-1                                                            |
| maker-3-augustus-gene-191.25-mRNA-1 | NA | NA       |            | Os03g0389400 | OsR498G0306083400.01.T02 | zf-LSD1 domain-containing protein                                        |
| maker-3-augustus-gene-192.9-mRNA-1  | NA | NA       |            | Os03g0392600 | OsR498G0306093000.01.T01 | Carboxypeptidase                                                         |
| maker-3-augustus-gene-194.32-mRNA-1 | NA | NA       |            | Os03g0393900 | OsR498G0306099500.01.T01 | Patatin                                                                  |
| maker-3-augustus-gene-194.34-mRNA-1 | NA | NA       |            | 0            | OsR498G0306098600.01.T05 | Carboxypeptidase                                                         |
| maker-3-augustus-gene-194.36-mRNA-1 | NA | Indica   |            | Os03g0392600 | OsR498G0306098600.01.T02 | Carboxypeptidase                                                         |
| maker-3-augustus-gene-194.37-mRNA-1 | NA | Indica   |            | Os03g0392600 | OsR498G0306098600.01.T06 | Carboxypeptidase                                                         |
| maker-3-augustus-gene-195.0-mRNA-1  | NA | Indica   |            | Os02g0567200 | OsR498G0306105100.01.T01 | PPM-type phosphatase domain-containing protein                           |
| maker-3-augustus-gene-195.2-mRNA-1  | NA | NA       |            | Os03g0394900 | OsR498G0306104200.01.T01 | Nodulation protein like                                                  |
| maker-3-augustus-gene-195.7-mRNA-1  | NA | NA       |            | Os03g0395000 | OsR498G0306105000.01.T01 | Inactive heme oxygenase                                                  |
| maker-3-augustus-gene-199.0-mRNA-1  | NA | NA       | Kinase     | 0            | OsR498G0306131300.01.T02 | Serine/threonine-protein kinase CTR1                                     |
| maker-3-augustus-gene-199.8-mRNA-1  | NA | NA       |            | 0            | OsR498G0306128200.01.T01 | NOP5NT domain-containing protein                                         |
| maker-3-augustus-gene-204.10-mRNA-1 | NA | NA       |            | 0            | OsR498G0306162200.01.T03 | Inter alpha-trypsin inhibitor, heavy chain 4                             |
| maker-3-augustus-gene-204.6-mRNA-1  | NA | NA       |            | 0            | OsR498G0306161900.01.T03 | Lazarus                                                                  |
| maker-3-augustus-gene-205.29-mRNA-1 | NA | NA       |            | 0            | OsR498G0306170700.01.T02 | Transcription initiation factor TFIID subunit 9                          |
| maker-3-augustus-gene-205.32-mRNA-1 | NA | NA       |            | Os03g0407400 |                          | Grain length and weight protein (Fragment)                               |
| maker-3-augustus-gene-205.34-mRNA-1 | NA | Japonica | Kinase-TM  | Os03g0407900 | OsR498G0306167000.01.T01 | Serine/threonine-protein kinase RIPK                                     |
| maker-3-augustus-gene-205.37-mRNA-1 | NA | NA       |            |              |                          | SRF-type transcription factor family protein                             |
| maker-3-augustus-gene-206.0-mRNA-1  | NA | NA       |            |              |                          |                                                                          |
| maker-3-augustus-gene-206.4-mRNA-1  | NA | NA       |            | 0            | OsR498G0306177300.01.T04 | Sentrin-specific protease 2                                              |
| maker-3-augustus-gene-206.9-mRNA-1  | NA | Indica   |            | Os03g0409400 | OsR498G0306175000.01.T01 | MOB kinase activator family                                              |
| maker-3-augustus-gene-207.0-mRNA-1  | NA | NA       |            | Os03g0410900 | OsR498G0306181500.01.T01 | Small nuclear ribonucleoprotein G                                        |
| maker-3-augustus-gene-207.11-mRNA-1 | NA | NA       |            | Os03g0411500 | OsR498G0306186500.01.T01 | ATP-dependent Clp protease proteolytic subunit                           |
| maker-3-augustus-gene-207.15-mRNA-1 | NA | NA       |            | Os03g0411600 | OsR498G0306186700.01.T01 | ATP-dependent Clp protease proteolytic subunit                           |
| maker-3-augustus-gene-207.17-mRNA-1 | NA | NA       |            | 0            | OsR498G0306181400.01.T02 | NAD(P)-binding domain containing protein                                 |
| maker-3-augustus-gene-207.2-mRNA-1  | NA | NA       |            | Os03g0411000 | OsR498G0306181900.01.T01 | Hydroxyproline-rich glycoprotein family protein, putative, expressed     |
| maker-3-augustus-gene-207.23-mRNA-1 | NA | NA       |            | Os03g0411800 | OsR498G0306188000.01.T01 | Zinc transporter 2                                                       |
| maker-3-augustus-gene-207.26-mRNA-1 | NA | Japonica |            | Os03g0411900 | OsR498G0306190000.01.T02 |                                                                          |
| maker-3-augustus-gene-207.6-mRNA-1  | NA | NA       |            | Os03g0411100 | OsR498G0306182900.01.T09 | CCAAT-binding transcription factor                                       |
| maker-3-augustus-gene-208.29-mRNA-1 | NA | Indica   |            | Os03g0412300 | OsR498G0306190900.01.T03 | Heavy metal-associated domain containing protein, expressed              |
| maker-3-augustus-gene-208.31-mRNA-1 | NA | NA       |            | Os03g0412800 | OsR498G0306192500.01.T06 | Glucose-6-phosphate 1-dehydrogenase                                      |
| maker-3-augustus-gene-208.36-mRNA-1 | NA | NA       |            | 0            | OsR498G0306193100.01.T02 |                                                                          |
| maker-3-augustus-gene-208.42-mRNA-1 | NA | NA       |            | Os03g0413100 | OsR498G0306193900.01.T04 | ACT domain repeat 4                                                      |
| maker-3-augustus-gene-208.48-mRNA-1 | NA | NA       |            | Os08g0487300 | OsR498G0816350400.01.T01 | Transposon protein, putative, Mutator sub-class, expressed               |
| maker-3-augustus-gene-208.52-mRNA-1 | NA | NA       |            | Os03g0413400 | OsR498G0306195400.01.T01 | Hexosyltransferase                                                       |
| maker-3-augustus-gene-209.37-mRNA-1 | NA | NA       |            | Os03g0414400 | OsR498G0306200600.01.T01 |                                                                          |
| maker-3-augustus-gene-209.39-mRNA-1 | NA | NA       |            | Os03g0415200 | OsR498G0306205000.01.T03 | PI-PLC X domain-containing protein                                       |
| maker-3-augustus-gene-210.37-mRNA-1 | NA | NA       |            | Os03g0416500 | OsR498G0306211200.01.T02 | Probable 6-phosphogluconolactonase                                       |
| maker-3-augustus-gene-211.0-mRNA-1  | NA | Indica   |            | Os07g0178700 | OsR498G0306215800.01.T01 | Early light-inducible protein ELIP                                       |
| maker-3-augustus-gene-211.5-mRNA-1  | NA | NA       |            | Os03g0417900 | OsR498G0306219200.01.T01 | Vacuolar protein sorting-associated protein 52 isogeny                   |
| maker-3-augustus-gene-220.0-mRNA-1  | NA | NA       |            | 0            | OsR498G0101346700.01.T01 |                                                                          |
| maker-3-augustus-gene-224.11-mRNA-1 | NA | NA       |            | Os06g0310200 | OsR498G0408570300.01.T02 | Regulator of nonsense transcripts 1-like                                 |
| maker-3-augustus-gene-235.34-mRNA-1 | NA | NA       |            |              |                          |                                                                          |
| maker-3-augustus-gene-235.36-mRNA-1 | NA | NA       |            | Os03g0570800 | OsR498G0306412800.01.T03 | Protein DETOXIFICATION                                                   |
| maker-3-augustus-gene-235.37-mRNA-1 | NA | NA       |            | Os06g0111700 | OsR498G0611496700.01.T01 | Protein DETOXIFICATION                                                   |
| maker-3-augustus-gene-235.43-mRNA-1 | NA | Indica   |            | Os03g0571700 | OsR498G0306415400.01.T01 | Protein DETOXIFICATION                                                   |
| maker-3-augustus-gene-235.46-mRNA-1 | NA | Indica   |            | Os03g0570800 | OsR498G0306415800.01.T02 | Protein DETOXIFICATION                                                   |
| maker-3-augustus-gene-235.50-mRNA-1 | NA | Japonica |            | Os03g0572250 | OsR498G1120379000.01.T02 | Cell division cycle-associated protein 7                                 |
| maker-3-augustus-gene-235.52-mRNA-1 | NA | NA       |            | Os03g0572300 | OsR498G0306417600.01.T05 | VPS37 C-terminal domain-containing protein                               |
| maker-3-augustus-gene-236.39-mRNA-1 | NA | NA       |            | Os03g0572900 | OsR498G0306418600.01.T01 | Protein DETOXIFICATION                                                   |
| maker-3-augustus-gene-236.44-mRNA-1 | NA | NA       | LRR-NBS-TM | Os03g0573500 | OsR498G0306422200.01.T01 | Putative disease resistance protein RGA3                                 |
| maker-3-augustus-gene-237.0-mRNA-1  | NA | NA       |            | 0            | OsR498G0306423400.01.T01 |                                                                          |
| maker-3-augustus-gene-237.2-mRNA-1  | NA | NA       |            | Os03g0574900 | OsR498G0306427000.01.T02 | Potassium transporter                                                    |
| maker-3-augustus-gene-237.7-mRNA-1  | NA | NA       |            | Os03g0575200 | OsR498G0306428400.01.T01 | Potassium transporter                                                    |
| maker-3-augustus-gene-238.0-mRNA-1  | NA | NA       |            | Os03g0576900 | OsR498G0306433700.01.T02 | Polyamine transporter RMV1                                               |
| maker-3-augustus-gene-238.10-mRNA-1 | NA | Japonica |            | Os03g0576600 | OsR498G0815254000.01.T01 | ACB domain-containing protein (Fragment)                                 |

|                                     |    |          |               |              |                          |                                                                |
|-------------------------------------|----|----------|---------------|--------------|--------------------------|----------------------------------------------------------------|
| maker-3-augustus-gene-238.14-mRNA-1 | NA | NA       |               | Os03g0576700 | OsR498G0306433400.01.T01 | 60S ribosomal protein L13                                      |
| maker-3-augustus-gene-238.18-mRNA-1 | NA | NA       |               | Os03g0577000 | OsR498G0306434000.01.T01 | KH type-2 domain-containing protein (Fragment)                 |
| maker-3-augustus-gene-238.2-mRNA-1  | NA | NA       |               | Os03g0577200 | OsR498G0306434900.01.T01 | MOB kinase activator-like 1                                    |
| maker-3-augustus-gene-238.21-mRNA-1 | NA | NA       |               | Os03g0577100 | OsR498G0306434400.01.T02 | Nuf2 family protein, expressed                                 |
| maker-3-augustus-gene-238.26-mRNA-1 | NA | NA       |               | Os03g0577500 | OsR498G0306435600.01.T01 | Hexosyltransferase                                             |
| maker-3-augustus-gene-238.7-mRNA-1  | NA | NA       |               | 0            | OsR498G0306431400.01.T02 |                                                                |
| maker-3-augustus-gene-238.8-mRNA-1  | NA | NA       |               | Os03g0576200 | OsR498G0306432000.01.T01 | Potassium transporter                                          |
| maker-3-augustus-gene-239.27-mRNA-1 | NA | Japonica |               | Os03g0578900 | OsR498G0306440100.01.T01 | Myb domain protein 101                                         |
| maker-3-augustus-gene-239.29-mRNA-1 | NA | NA       | LRR-NBS-TM    |              |                          | Putative NBS-LRR type disease resistance protein               |
| maker-3-augustus-gene-239.32-mRNA-1 | NA | NA       |               | Os03g0578200 | OsR498G0306437600.01.T02 |                                                                |
| maker-3-augustus-gene-239.34-mRNA-1 | NA | NA       |               | Os03g0337800 | OsR498G0306442600.01.T02 | Ribosomal protein L19                                          |
| maker-3-augustus-gene-240.31-mRNA-1 | NA | NA       | CC-LRR-NBS-TM | 0            | OsR498G0306443900.01.T02 | Disease resistance protein RGA3                                |
| maker-3-augustus-gene-240.34-mRNA-1 | NA | NA       |               | 0            | OsR498G0306444400.01.T01 | GDSL esterase/lipase                                           |
| maker-3-augustus-gene-240.36-mRNA-1 | NA | NA       |               | Os09g0443400 |                          | Transposon protein, putative, CACTA, En/Spm sub-class          |
| maker-3-augustus-gene-240.37-mRNA-1 | NA | NA       |               | Os09g0443400 | OsR498G1220899000.01.T01 | Glycine-rich RNA-binding protein-like                          |
| maker-3-augustus-gene-240.46-mRNA-1 | NA | NA       |               | Os03g0580800 | OsR498G0306446200.01.T01 | GDSL-like Lipase/Acylhydrolase family protein, expressed       |
| maker-3-augustus-gene-241.30-mRNA-1 | NA | Japonica |               | Os03g0581400 | OsR498G0306450100.01.T01 | GDSL-like Lipase/Acylhydrolase family protein, expressed       |
| maker-3-augustus-gene-241.32-mRNA-1 | NA | NA       |               |              |                          | QWRF motif-containing protein 3                                |
| maker-3-augustus-gene-241.34-mRNA-1 | NA | Indica   |               | Os03g0581600 | OsR498G0306451100.01.T01 | Multiple organellar RNA editing factor 3 like                  |
| maker-3-augustus-gene-241.36-mRNA-1 | NA | NA       |               | 0            | OsR498G0306451300.01.T02 |                                                                |
| maker-3-augustus-gene-241.40-mRNA-1 | NA | Indica   |               | Os03g0581800 | OsR498G0306451900.01.T03 | 1D-myo-inositol 2-amino-2-deoxy-alpha-D-glucopyranoside ligase |
| maker-3-augustus-gene-241.43-mRNA-1 | NA | NA       |               | Os03g0582000 | OsR498G0306452500.01.T04 | Glutamate formimidoyltransferase                               |
| maker-3-augustus-gene-241.45-mRNA-1 | NA | NA       |               | Os03g0582200 | OsR498G0306453400.01.T03 | Secretory carrier-associated membrane protein 4                |
| maker-3-augustus-gene-241.51-mRNA-1 | NA | Indica   |               | Os03g0582200 | OsR498G0306453600.01.T02 | Secretory carrier-associated membrane protein 4                |
| maker-3-augustus-gene-242.37-mRNA-1 | NA | NA       |               | 0            | OsR498G1120154400.01.T01 |                                                                |
| maker-3-augustus-gene-242.39-mRNA-1 | NA | NA       |               | 0            | OsR498G0917085900.01.T01 |                                                                |
| maker-3-augustus-gene-242.41-mRNA-1 | NA | NA       |               | Os03g0583800 | OsR498G0306460900.01.T06 | Peroxisomal membrane protein 2                                 |
| maker-3-augustus-gene-242.47-mRNA-1 | NA | NA       |               | Os03g0584300 | OsR498G0306462300.01.T02 | Adenosinetriphosphatase                                        |
| maker-3-augustus-gene-242.50-mRNA-1 | NA | NA       |               | 0            | OsR498G0306464600.01.T04 |                                                                |
| maker-3-augustus-gene-242.55-mRNA-1 | NA | NA       |               |              |                          | Endoribonuclease Dicer 2                                       |
| maker-3-augustus-gene-242.65-mRNA-1 | NA | NA       |               | Os09g0315200 | OsR498G0917089000.01.T04 |                                                                |
| maker-3-augustus-gene-243.0-mRNA-1  | NA | NA       |               | Os03g0586500 | OsR498G0306466900.01.T01 | Post-illumination chlorophyll fluorescence increase            |
| maker-3-augustus-gene-243.3-mRNA-1  | NA | Indica   |               | Os03g0586300 | OsR498G0306466600.01.T04 | Xyloglucanase 113 isoform 1                                    |
| maker-3-augustus-gene-243.8-mRNA-1  | NA | NA       |               | Os03g0586600 | OsR498G0306467200.01.T01 | DNA-directed RNA polymerases II IV and V subunit 6A            |
| maker-3-augustus-gene-244.42-mRNA-1 | NA | NA       |               | Os03g0587000 | OsR498G0306468300.01.T01 | Inositol-1-monophosphatase                                     |
| maker-3-augustus-gene-244.47-mRNA-1 | NA | Indica   |               | Os03g0587100 | OsR498G0306468500.01.T01 | Cytokinin riboside 5'-monophosphate phosphoribohydrolase       |
| maker-3-augustus-gene-244.49-mRNA-1 | NA | NA       |               | Os03g0588200 | OsR498G0306473300.01.T01 | BACK domain-containing protein                                 |
| maker-3-augustus-gene-244.51-mRNA-1 | NA | NA       |               | Os03g0588600 | OsR498G0306474500.01.T01 |                                                                |
| maker-3-augustus-gene-244.56-mRNA-1 | NA | NA       |               | Os03g0586700 | OsR498G0306467600.01.T01 | Paladin                                                        |
| maker-3-augustus-gene-244.59-mRNA-1 | NA | NA       |               | Os03g0586800 | OsR498G0306468000.01.T02 | Lysine-tRNA ligase                                             |
| maker-3-augustus-gene-244.63-mRNA-1 | NA | NA       |               | Os03g0587200 | OsR498G0306468800.01.T01 | Putative plus-end-directed kinesin ATPase                      |
| maker-3-augustus-gene-245.31-mRNA-1 | NA | Indica   |               | Os03g0588700 | OsR498G0306474900.01.T01 |                                                                |
| maker-3-augustus-gene-245.35-mRNA-1 | NA | NA       |               | Os03g0589300 | OsR498G0306477000.01.T02 | OTU domain-containing                                          |
| maker-3-augustus-gene-247.33-mRNA-1 | NA | NA       |               | 0            | OsR498G0917123900.01.T01 |                                                                |
| maker-3-augustus-gene-247.36-mRNA-1 | NA | NA       |               | Os03g0592500 | OsR498G0306485300.01.T02 | Chlorophyll a-b binding protein, chloroplastic                 |
| maker-3-augustus-gene-247.38-mRNA-1 | NA | NA       |               | 0            | OsR498G0306483000.01.T01 | Pentatricopeptide, putative                                    |
| maker-3-augustus-gene-247.40-mRNA-1 | NA | Indica   |               | Os03g0593200 | OsR498G0306486600.01.T01 | DUF21 domain-containing protein chloroplastic                  |
| maker-3-augustus-gene-248.0-mRNA-1  | NA | NA       |               | Os03g0593600 | OsR498G0306487100.01.T01 | Ent-cassadiene C2-hydroxylase                                  |
| maker-3-augustus-gene-248.10-mRNA-1 | NA | NA       |               | Os03g0594700 | OsR498G0306492800.01.T01 | DUF862 domain-containing protein                               |
| maker-3-augustus-gene-248.2-mRNA-1  | NA | NA       |               | Os03g0594100 | OsR498G0306490700.01.T01 | Ent-isokaurene C2-hydroxylase                                  |
| maker-3-augustus-gene-248.4-mRNA-1  | NA | NA       |               | 0            | OsR498G0611818300.01.T01 | PLAT domain-containing protein                                 |
| maker-3-augustus-gene-248.6-mRNA-1  | NA | NA       |               | Os03g0594900 | OsR498G0306492900.01.T01 | Ent-isokaurene C2-hydroxylase                                  |
| maker-3-augustus-gene-248.8-mRNA-1  | NA | NA       |               | Os03g0594400 | OsR498G0306491600.01.T01 | Sugar carrier protein C                                        |
| maker-3-augustus-gene-249.0-mRNA-1  | NA | NA       |               | Os03g0595200 | OsR498G0306493500.01.T01 | Cysteine synthase 2-like isoform X1                            |
| maker-3-augustus-gene-249.11-mRNA-1 | NA | NA       |               | Os03g0596800 | OsR498G0306498400.01.T01 | Probable xyloglucan glycosyltransferase 7                      |
| maker-3-augustus-gene-249.13-mRNA-1 | NA | NA       |               | Os03g0596900 | OsR498G0306498800.01.T05 | DEK domain-containing chromatin associated protein             |
| maker-3-augustus-gene-249.2-mRNA-1  | NA | NA       |               | Os03g0595600 | OsR498G0306494800.01.T01 | Glutathione S-transferase GST 24                               |
| maker-3-augustus-gene-249.4-mRNA-1  | NA | NA       |               | 0            | OsR498G0306495200.01.T02 | Carrier domain-containing protein                              |
| maker-3-augustus-gene-249.6-mRNA-1  | NA | NA       |               | Os03g0596400 |                          | XH domain containing protein, expressed                        |
| maker-3-augustus-gene-249.8-mRNA-1  | NA | NA       |               |              |                          | Factor of DNA methylation 5                                    |
| maker-3-augustus-gene-250.32-mRNA-1 | NA | NA       |               | Os03g0598100 | OsR498G0306502700.01.T05 | Amino acid binding protein, putative                           |

|                                     |    |          |           |              |                          |                                                                            |
|-------------------------------------|----|----------|-----------|--------------|--------------------------|----------------------------------------------------------------------------|
| maker-3-augustus-gene-250.36-mRNA-1 | NA | Indica   |           | Os03g0365200 | OsR498G0306004300.01.T01 | Ulp1 protease family, C-terminal catalytic domain containing protein       |
| maker-3-augustus-gene-250.39-mRNA-1 | NA | NA       |           | Os03g0598700 | OsR498G0306505500.01.T02 | E3 ubiquitin-protein ligase                                                |
| maker-3-augustus-gene-250.41-mRNA-1 | NA | NA       |           | Os03g0597600 | OsR498G0306500800.01.T01 | N-terminal nucleophile aminohydrolases (Ntn hydrolases) superfamily prote  |
| maker-3-augustus-gene-250.42-mRNA-1 | NA | Indica   |           | Os03g0597600 | OsR498G0306500800.01.T02 | Isoaspartyl peptidase/L-asparaginase 1 subunit beta like                   |
| maker-3-augustus-gene-250.47-mRNA-1 | NA | NA       |           | Os03g0598200 | OsR498G0306503000.01.T01 | Nucleolar protein 14                                                       |
| maker-3-augustus-gene-250.52-mRNA-1 | NA | NA       |           | 0            | OsR498G0306503400.01.T01 | Usp domain-containing protein (Fragment)                                   |
| maker-3-augustus-gene-250.54-mRNA-1 | NA | NA       |           |              |                          |                                                                            |
| maker-3-augustus-gene-251.13-mRNA-1 | NA | NA       |           | Os03g0598800 | OsR498G0306506000.01.T01 | Ribosomal protein L15                                                      |
| maker-3-augustus-gene-251.17-mRNA-1 | NA | NA       |           | 0            | OsR498G0306506200.01.T02 | DSBA oxidoreductase family protein isoform 2                               |
| maker-3-augustus-gene-251.2-mRNA-1  | NA | NA       |           | 0            | OsR498G0306507900.01.T01 | Ultraviolet-B receptor UVR8                                                |
| maker-3-augustus-gene-251.24-mRNA-1 | NA | Japonica | NBS-TM    | Os03g0599000 | OsR498G0306507000.01.T01 | Putative NBS-LRR type resistance protein                                   |
| maker-3-augustus-gene-251.26-mRNA-1 | NA | Japonica |           | Os03g0599800 | OsR498G0306508200.01.T02 | UDP-arabinopyranose mutase                                                 |
| maker-3-augustus-gene-251.29-mRNA-1 | NA | NA       |           |              |                          | RRM domain-containing protein                                              |
| maker-3-augustus-gene-251.31-mRNA-1 | NA | Japonica |           | Os03g0600500 | OsR498G1018781700.01.T01 | Glucan endo-1,3-beta-glucosidase GII                                       |
| maker-3-augustus-gene-252.24-mRNA-1 | NA | NA       |           | Os03g0601500 | OsR498G0306512300.01.T01 |                                                                            |
| maker-3-augustus-gene-252.26-mRNA-1 | NA | NA       |           | 0            | OsR498G0306511400.01.T01 | DUF295 domain-containing protein (Fragment)                                |
| maker-3-augustus-gene-253.35-mRNA-1 | NA | NA       |           | 0            | OsR498G0306516900.01.T05 | Fructokinase-like protein 2, chloroplastic                                 |
| maker-3-augustus-gene-253.37-mRNA-1 | NA | NA       |           | Os03g0603600 | OsR498G0306522300.01.T01 | Glycerophosphodiester phosphodiesterase                                    |
| maker-3-augustus-gene-253.41-mRNA-1 | NA | NA       |           |              |                          |                                                                            |
| maker-3-augustus-gene-253.43-mRNA-1 | NA | Indica   |           | Os03g0603100 | OsR498G0306519600.01.T01 | Cytochrome P450, E-class, group I                                          |
| maker-3-augustus-gene-254.43-mRNA-1 | NA | Japonica |           | Os03g0604500 | OsR498G0306524700.01.T01 | Keratin, type II cytoskeletal 2 epidermal-like                             |
| maker-3-augustus-gene-254.45-mRNA-1 | NA | NA       |           | 0            | OsR498G0306525000.01.T01 |                                                                            |
| maker-3-augustus-gene-255.0-mRNA-1  | NA | Indica   |           | Os12g0581700 | OsR498G0306532100.01.T01 | Seed maturation protein PM23, putative, expressed                          |
| maker-3-augustus-gene-255.4-mRNA-1  | NA | Japonica |           | Os03g0606100 | OsR498G0306528600.01.T04 | Lipase, putative, expressed                                                |
| maker-3-augustus-gene-255.9-mRNA-1  | NA | Indica   |           | Os12g0581600 | OsR498G0306532000.01.T01 | Metal transporter Nramp3                                                   |
| maker-3-augustus-gene-256.0-mRNA-1  | NA | NA       |           | Os03g0607600 | OsR498G0306537300.01.T01 | Cyclin N-terminal domain-containing protein (Fragment)                     |
| maker-3-augustus-gene-256.12-mRNA-1 | NA | NA       |           |              |                          |                                                                            |
| maker-3-augustus-gene-256.4-mRNA-1  | NA | NA       |           | Os03g0608800 | OsR498G0306542700.01.T04 |                                                                            |
| maker-3-augustus-gene-256.9-mRNA-1  | NA | NA       |           | Os03g0607800 | OsR498G0306538000.01.T01 | LisH domain-containing protein                                             |
| maker-3-augustus-gene-257.28-mRNA-1 | NA | Indica   |           | Os07g0477000 | OsR498G0306543500.01.T01 | RNA polymerase Rpb7 N-terminal domain-containing protein                   |
| maker-3-augustus-gene-257.30-mRNA-1 | NA | NA       |           | Os03g0609500 | OsR498G0306544400.01.T01 | LOB domain-containing protein 37                                           |
| maker-3-augustus-gene-257.32-mRNA-1 | NA | NA       |           | Os03g0609800 | OsR498G0306545400.01.T01 | BTB/POZ domain-containing protein NPY2                                     |
| maker-3-augustus-gene-258.0-mRNA-1  | NA | Indica   |           | Os03g0610800 | OsR498G0306548700.01.T01 | SERPIN domain-containing protein (Fragment)                                |
| maker-3-augustus-gene-258.11-mRNA-1 | NA | Indica   | Kinase-TM | Os03g0610900 | OsR498G0306549800.01.T02 | Serine/threonine-protein kinase SAPK10                                     |
| maker-3-augustus-gene-258.16-mRNA-1 | NA | NA       |           |              |                          | Primosome PriB/single-strand DNA-binding protein                           |
| maker-3-augustus-gene-258.2-mRNA-1  | NA | NA       |           | Os03g0610800 | OsR498G0306549300.01.T01 | SERPIN domain-containing protein (Fragment)                                |
| maker-3-augustus-gene-258.3-mRNA-1  | NA | Japonica |           | Os03g0610800 | OsR498G0306548700.01.T01 | SERPIN domain-containing protein (Fragment)                                |
| maker-3-augustus-gene-258.6-mRNA-1  | NA | NA       |           | Os03g0611200 | OsR498G0306550700.01.T05 | Putative aldo/keto reductase, NADP-dependent oxidoreductase domain-con     |
| maker-3-augustus-gene-259.41-mRNA-1 | NA | NA       |           | 0            | OsR498G0306554000.01.T02 | Ribosomal 5S rRNA E-loop binding protein Ctc/L25/TL5 containing protein, e |
| maker-3-augustus-gene-259.44-mRNA-1 | NA | Japonica |           | Os03g0615700 | OsR498G0102477000.01.T01 | GRF zinc finger family protein, expressed                                  |
| maker-3-augustus-gene-26.40-mRNA-1  | NA | NA       |           | 0            | OsR498G0305240700.01.T02 | Putative lysine-specific demethylase ELF6                                  |
| maker-3-augustus-gene-26.75-mRNA-1  | NA | NA       |           | 0            | OsR498G0305245000.01.T01 | 4-coumarate--CoA ligase-like protein 7                                     |
| maker-3-augustus-gene-260.27-mRNA-1 | NA | Japonica |           | Os03g0615700 | OsR498G0102477000.01.T01 | GRF zinc finger family protein, expressed                                  |
| maker-3-augustus-gene-261.0-mRNA-1  | NA | NA       |           | 0            | OsR498G0306562700.01.T05 | DNA polymerase kappa                                                       |
| maker-3-augustus-gene-261.12-mRNA-1 | NA | NA       |           | 0            | OsR498G0306564400.01.T01 | Importin N-terminal domain-containing protein                              |
| maker-3-augustus-gene-261.22-mRNA-1 | NA | NA       |           | Os03g0617500 | OsR498G0306566200.01.T01 | Cyclin N-terminal domain-containing protein                                |
| maker-3-augustus-gene-261.6-mRNA-1  | NA | NA       |           |              |                          | Calcium-transporting ATPase                                                |
| maker-3-augustus-gene-262.49-mRNA-1 | NA | Indica   |           | Os05g0556700 | OsR498G0306571500.01.T02 | CCT-beta                                                                   |
| maker-3-augustus-gene-262.54-mRNA-1 | NA | NA       |           | Os03g0619600 | OsR498G0306571700.01.T01 | B3 domain-containing protein (Fragment)                                    |
| maker-3-augustus-gene-262.56-mRNA-1 | NA | NA       |           | 0            | OsR498G0306572300.01.T01 | B3 domain-containing protein                                               |
| maker-3-augustus-gene-262.59-mRNA-1 | NA | Japonica |           | Os03g0617800 | OsR498G0306568000.01.T01 | Transcription factor bHLH84 like                                           |
| maker-3-augustus-gene-262.61-mRNA-1 | NA | Japonica |           | Os03g0617900 | OsR498G1018971300.01.T01 | Probable N-acetyl-gamma-glutamyl-phosphate reductase, chloroplastic        |
| maker-3-augustus-gene-262.66-mRNA-1 | NA | NA       |           | Os03g0618300 | OsR498G0306569000.01.T01 | Feruloyl-CoA 6-hydroxylase                                                 |
| maker-3-augustus-gene-262.70-mRNA-1 | NA | NA       |           | Os05g0168200 | OsR498G0509819800.01.T01 | PGG domain-containing protein                                              |
| maker-3-augustus-gene-263.0-mRNA-1  | NA | NA       | TIR       | Os03g0620400 | OsR498G0306573300.01.T02 | B3 domain-containing protein (Fragment)                                    |
| maker-3-augustus-gene-263.16-mRNA-1 | NA | NA       |           | Os03g0622100 | OsR498G0306578700.01.T01 | Putative B3 domain-containing protein (Fragment)                           |
| maker-3-augustus-gene-263.19-mRNA-1 | NA | NA       |           | Os03g0622200 | OsR498G0306579100.01.T01 | Putative B3 domain-containing protein (Fragment)                           |
| maker-3-augustus-gene-263.21-mRNA-1 | NA | NA       |           | Os03g0620800 | OsR498G0306574600.01.T02 | SEC1 family transport protein SLY1                                         |
| maker-3-augustus-gene-263.31-mRNA-1 | NA | Japonica |           | Os03g0622300 | OsR498G1222012100.01.T02 |                                                                            |
| maker-3-augustus-gene-263.5-mRNA-1  | NA | Indica   |           | Os02g0494400 | OsR498G0306575100.01.T02 | Heat shock protein STI                                                     |
| maker-3-augustus-gene-263.9-mRNA-1  | NA | NA       |           | Os03g0621600 | OsR498G0306575900.01.T01 | TF-B3 domain-containing protein                                            |

|                                     |    |          |               |              |                          |                                                                         |
|-------------------------------------|----|----------|---------------|--------------|--------------------------|-------------------------------------------------------------------------|
| maker-3-augustus-gene-264.0-mRNA-1  | NA | NA       |               | Os02g0782600 | OsR498G0204890700.01.T06 | SAC domain-containing protein                                           |
| maker-3-augustus-gene-264.2-mRNA-1  | NA | NA       |               | 0            | OsR498G0714121500.01.T01 |                                                                         |
| maker-3-augustus-gene-264.4-mRNA-1  | NA | NA       |               | Os10g0429500 |                          | Transposon protein, putative, CACTA, En/Spm sub-class                   |
| maker-3-augustus-gene-265.0-mRNA-1  | NA | NA       |               | Os10g0427200 |                          | Zinc finger MYM-type protein 1                                          |
| maker-3-augustus-gene-274.40-mRNA-1 | NA | NA       |               | Os10g0410300 |                          | Transposon protein, putative, Pong sub-class, expressed                 |
| maker-3-augustus-gene-274.47-mRNA-1 | NA | NA       |               | 0            | OsR498G1018704900.01.T01 | Transposable element protein, putative, MuDR                            |
| maker-3-augustus-gene-276.0-mRNA-1  | NA | NA       |               | Os10g0408700 |                          | Protein-serine/threonine phosphatase                                    |
| maker-3-augustus-gene-278.6-mRNA-1  | NA | NA       |               | 0            | OsR498G1018680400.01.T01 | Cyclic dof factor 2                                                     |
| maker-3-augustus-gene-279.4-mRNA-1  | NA | NA       |               | Os02g0452800 |                          | Epimerase domain-containing protein                                     |
| maker-3-augustus-gene-28.14-mRNA-1  | NA | NA       |               | Os03g0157450 |                          | DDE Tnp4 domain-containing protein (Fragment)                           |
| maker-3-augustus-gene-28.26-mRNA-1  | NA | NA       |               | Os03g0157400 | OsR498G0305254600.01.T03 | G family ATP-binding cassette transporter                               |
| maker-3-augustus-gene-280.27-mRNA-1 | NA | NA       |               | 0            | OsR498G1018668900.01.T02 | Glucose-fructose oxidoreductase, bacterial                              |
| maker-3-augustus-gene-281.0-mRNA-1  | NA | NA       |               | Os10g0402400 | OsR498G1018663400.01.T02 | Anthocyanin 5-aromatic acyltransferase                                  |
| maker-3-augustus-gene-281.11-mRNA-1 | NA | NA       |               | Os10g0402100 | OsR498G0100866200.01.T01 | No apical meristem protein, expressed                                   |
| maker-3-augustus-gene-281.18-mRNA-1 | NA | NA       |               | Os10g0401100 | OsR498G1018661100.01.T01 | Endonuclease/Exonuclease/phosphatase family protein, expressed          |
| maker-3-augustus-gene-281.2-mRNA-1  | NA | NA       |               | Os10g0402200 | OsR498G1018663000.01.T01 | Origin recognition complex                                              |
| maker-3-augustus-gene-281.20-mRNA-1 | NA | NA       |               | Os10g0400900 | OsR498G1018659900.01.T02 | Mic1 domain-containing protein (Fragment)                               |
| maker-3-augustus-gene-282.33-mRNA-1 | NA | NA       |               | Os10g0400200 | OsR498G1018658200.01.T01 | Glutelin type-A 2                                                       |
| maker-3-augustus-gene-282.37-mRNA-1 | NA | NA       |               | Os10g0400100 | OsR498G1018657900.01.T01 | Methionyl-tRNA synthetase                                               |
| maker-3-augustus-gene-283.5-mRNA-1  | NA | NA       |               | 0            | OsR498G1018652100.01.T01 | CCAAT-binding transcription factor B                                    |
| maker-3-augustus-gene-285.39-mRNA-1 | NA | NA       |               | Os10g0394100 | OsR498G1018639800.01.T05 | Metallophos domain-containing protein (Fragment)                        |
| maker-3-augustus-gene-285.49-mRNA-1 | NA | NA       |               | Os10g0393800 | OsR498G1018638900.01.T01 | GDSL-like Lipase/Acylhydrolase family protein, expressed                |
| maker-3-augustus-gene-287.0-mRNA-1  | NA | NA       |               | 0            | OsR498G1018629800.01.T01 | Zinc finger CCCH domain-containing protein 62                           |
| maker-3-augustus-gene-289.0-mRNA-1  | NA | NA       |               | Os10g0387000 | OsR498G1018615200.01.T01 | Ethanolamine-phosphate cytidylyltransferase-like                        |
| maker-3-augustus-gene-289.20-mRNA-1 | NA | NA       |               | Os08g0224900 | OsR498G0815465400.01.T01 | (3R)-hydroxymyristoyl-[acyl-carrier-protein] dehydratase                |
| maker-3-augustus-gene-289.6-mRNA-1  | NA | NA       |               |              |                          | ATP-dependent DNA helicase                                              |
| maker-3-augustus-gene-301.22-mRNA-1 | NA | NA       |               | Os10g0370500 | OsR498G1018560400.01.T01 | Mannan endo-1,4-beta-mannosidase                                        |
| maker-3-augustus-gene-301.25-mRNA-1 | NA | NA       | NBS-TM        | Os10g0370100 |                          | calmodulin-binding transcription activator 3                            |
| maker-3-augustus-gene-301.27-mRNA-1 | NA | NA       | Kinase-TM     |              |                          | Serine/threonine-protein kinase edr1                                    |
| maker-3-augustus-gene-301.29-mRNA-1 | NA | NA       | CC-LRR-NBS-TM | Os10g0370400 | OsR498G1018560100.01.T01 | Disease resistance protein RPP13                                        |
| maker-3-augustus-gene-302.0-mRNA-1  | NA | NA       |               | Os10g0370000 | OsR498G1018558800.01.T04 | PPM-type phosphatase domain-containing protein                          |
| maker-3-augustus-gene-302.11-mRNA-1 | NA | NA       |               | Os10g0369900 | OsR498G1018558500.01.T01 | Myo-inositol 1-phosphate synthase                                       |
| maker-3-augustus-gene-304.0-mRNA-1  | NA | NA       |               | 0            | OsR498G1018550000.01.T01 | C2 NT-type domain-containing protein (Fragment)                         |
| maker-3-augustus-gene-304.10-mRNA-1 | NA | NA       |               | Os10g0365800 | OsR498G1018554500.01.T01 |                                                                         |
| maker-3-augustus-gene-304.14-mRNA-1 | NA | NA       | NBS-TM        | 0            | OsR498G1018551100.01.T01 | NB-ARC domain containing protein, expressed                             |
| maker-3-augustus-gene-304.8-mRNA-1  | NA | NA       |               | Os10g0365800 | OsR498G1018554500.01.T01 |                                                                         |
| maker-3-augustus-gene-305.25-mRNA-1 | NA | NA       |               | 0            | OsR498G1018548100.01.T01 | Acetyl-CoA carboxylase                                                  |
| maker-3-augustus-gene-307.6-mRNA-1  | NA | NA       |               | Os10g0360100 | OsR498G1018533200.01.T01 | Polyol transporter 5                                                    |
| maker-3-augustus-gene-308.0-mRNA-1  | NA | NA       |               | Os10g0359500 | OsR498G1018531800.01.T03 | NAC domain-containing protein 68                                        |
| maker-3-augustus-gene-308.11-mRNA-1 | NA | NA       |               | Os10g0358600 | OsR498G1018527900.01.T01 | Histone deacetylase complex subunit SAP30                               |
| maker-3-augustus-gene-308.4-mRNA-1  | NA | NA       |               | 0            | OsR498G1018530200.01.T01 | DUF569 domain-containing protein                                        |
| maker-3-augustus-gene-31.0-mRNA-1   | NA | NA       |               | Os03g0161400 | OsR498G0305266900.01.T01 | IQ calmodulin-binding motif family protein, expressed                   |
| maker-3-augustus-gene-31.11-mRNA-1  | NA | NA       |               | Os03g0161900 | OsR498G0305270500.01.T08 | Heat shock transcription factor                                         |
| maker-3-augustus-gene-31.14-mRNA-1  | NA | Japonica |               | Os03g0162000 | OsR498G0305271700.01.T05 | Flavin-containing monooxygenase                                         |
| maker-3-augustus-gene-31.3-mRNA-1   | NA | NA       |               | Os03g0161500 | OsR498G0305267300.01.T04 | EGF-like domain-containing protein                                      |
| maker-3-augustus-gene-31.7-mRNA-1   | NA | NA       |               | Os03g0161800 | OsR498G0305270300.01.T04 | 1,2-dihydroxy-3-keto-5-methylthiopentene dioxygenase                    |
| maker-3-augustus-gene-311.6-mRNA-1  | NA | NA       | Kinase-TM     | Os10g0351500 | OsR498G1018522700.01.T01 | Tyrosine-protein kinase                                                 |
| maker-3-augustus-gene-313.32-mRNA-1 | NA | NA       |               |              |                          | Transposon protein, putative, Mutator sub-class, expressed              |
| maker-3-augustus-gene-315.10-mRNA-1 | NA | NA       |               | Os10g0346200 | OsR498G1018510900.01.T01 | Zinc finger, RING/FYVE/PHD-type                                         |
| maker-3-augustus-gene-315.8-mRNA-1  | NA | NA       |               | Os10g0346300 | OsR498G1018511200.01.T01 | Laccase                                                                 |
| maker-3-augustus-gene-317.37-mRNA-1 | NA | NA       |               | Os10g0344900 | OsR498G1018502800.01.T01 | Protein DETOXIFICATION                                                  |
| maker-3-augustus-gene-317.42-mRNA-1 | NA | NA       |               | Os10g0343500 |                          |                                                                         |
| maker-3-augustus-gene-318.37-mRNA-1 | NA | NA       |               | 0            | OsR498G1018442800.01.T03 |                                                                         |
| maker-3-augustus-gene-321.44-mRNA-1 | NA | NA       | Kinase-LRR-TM | Os10g0337400 | OsR498G1018480300.01.T01 | Receptor protein kinase                                                 |
| maker-3-augustus-gene-321.46-mRNA-1 | NA | NA       |               | Os03g0658800 | OsR498G0306712000.01.T02 | Cytochrome P450 family 87 subfamily A polypeptide 2                     |
| maker-3-augustus-gene-322.0-mRNA-1  | NA | NA       |               | Os10g0335200 | OsR498G1018478100.01.T04 | HNHc domain-containing protein                                          |
| maker-3-augustus-gene-322.4-mRNA-1  | NA | NA       |               | Os10g0335000 | OsR498G1018477300.01.T01 | Dirigent protein (Fragment)                                             |
| maker-3-augustus-gene-323.0-mRNA-1  | NA | NA       |               | Os10g0331700 | OsR498G1018472400.01.T01 | UDP-glucuronosyl and UDP-glucosyl transferase family protein, expressed |
| maker-3-augustus-gene-324.48-mRNA-1 | NA | NA       |               | Os10g0330400 | OsR498G1018462100.01.T01 | UPF0301 protein like                                                    |
| maker-3-augustus-gene-325.36-mRNA-1 | NA | NA       |               |              |                          |                                                                         |
| maker-3-augustus-gene-326.0-mRNA-1  | NA | NA       |               | 0            | OsR498G1018456600.01.T01 |                                                                         |

|                                     |    |          |               |              |                          |                                                                        |
|-------------------------------------|----|----------|---------------|--------------|--------------------------|------------------------------------------------------------------------|
| maker-3-augustus-gene-326.2-mRNA-1  | NA | NA       |               | Os10g0329300 | OsR498G1018458100.01.T03 | Mevalonate kinase                                                      |
| maker-3-augustus-gene-326.5-mRNA-1  | NA | NA       |               | Os08g0487300 | OsR498G0816350400.01.T01 | Transposon protein, putative, Mutator sub-class                        |
| maker-3-augustus-gene-327.24-mRNA-1 | NA | NA       |               | Os10g0327300 | OsR498G1018450400.01.T01 | Phosphatidate cytidyltransferase                                       |
| maker-3-augustus-gene-327.30-mRNA-1 | NA | NA       | Kinase-TM     | Os10g0327000 | OsR498G1018449400.01.T02 | Receptor-like serine/threonine-protein kinase                          |
| maker-3-augustus-gene-328.11-mRNA-1 | NA | NA       |               | 0            | OsR498G1018443100.01.T02 | Chromo domain-containing protein LHP1                                  |
| maker-3-augustus-gene-328.13-mRNA-1 | NA | NA       |               | Os10g0324600 | OsR498G1018442500.01.T01 | zinc finger protein 346                                                |
| maker-3-augustus-gene-328.2-mRNA-1  | NA | NA       |               | Os10g0490400 | OsR498G1018442800.01.T03 | Transposon protein, putative, unclassified, expressed                  |
| maker-3-augustus-gene-328.5-mRNA-1  | NA | NA       |               | Os10g0325400 | OsR498G1018443700.01.T01 | Remorin, C-terminal region family protein, expressed                   |
| maker-3-augustus-gene-329.0-mRNA-1  | NA | NA       |               | Os10g0323900 | OsR498G1018438600.01.T01 | Profilin-A                                                             |
| maker-3-augustus-gene-329.2-mRNA-1  | NA | NA       |               | Os10g0323600 | OsR498G1018437300.01.T01 | Profilin-A                                                             |
| maker-3-augustus-gene-329.4-mRNA-1  | NA | NA       |               | Os10g0323500 | OsR498G1018437100.01.T02 | 4-hydroxy-7-methoxy-3-oxo-3,4-dihydro-2H-1,4-benzoxazin-2-yl glucoside |
| maker-3-augustus-gene-329.7-mRNA-1  | NA | NA       |               | 0            | OsR498G0306694200.01.T02 | Chlorophyll(ide) b reductase NOL, chloroplastic                        |
| maker-3-augustus-gene-330.12-mRNA-1 | NA | NA       |               | Os10g0322250 |                          | Inorganic phosphate transporter 6                                      |
| maker-3-augustus-gene-330.15-mRNA-1 | NA | NA       |               | Os10g0322200 | OsR498G1018432500.01.T01 | Glycosyltransferase                                                    |
| maker-3-augustus-gene-330.4-mRNA-1  | NA | NA       |               | Os10g0321700 | OsR498G1018431000.01.T03 | Glycine-rich RNA-binding protein 3 mitochondrial                       |
| maker-3-augustus-gene-330.5-mRNA-1  | NA | NA       |               | Os10g0321700 | OsR498G1018431000.01.T03 | RRM domain-containing protein                                          |
| maker-3-augustus-gene-331.28-mRNA-1 | NA | Japonica |               | Os03g0650800 | OsR498G0306680500.01.T01 | Zein-binding domain-containing protein                                 |
| maker-3-augustus-gene-331.30-mRNA-1 | NA | NA       |               | Os04g0430600 | OsR498G0408587500.01.T01 | Late embryogenesis abundant protein, LEA-14                            |
| maker-3-augustus-gene-331.32-mRNA-1 | NA | Indica   |               | Os12g0618300 | OsR498G0306667400.01.T01 | CP-type G domain-containing protein                                    |
| maker-3-augustus-gene-331.34-mRNA-1 | NA | NA       |               | Os03g0650900 | OsR498G0306680800.01.T02 | RING-type E3 ubiquitin transferase                                     |
| maker-3-augustus-gene-335.21-mRNA-1 | NA | NA       |               |              |                          |                                                                        |
| maker-3-augustus-gene-343.5-mRNA-1  | NA | NA       |               | Os03g0570200 | OsR498G0203772900.01.T07 |                                                                        |
| maker-3-augustus-gene-344.36-mRNA-1 | NA | NA       |               |              |                          |                                                                        |
| maker-3-augustus-gene-344.38-mRNA-1 | NA | NA       |               | Os03g0570800 | OsR498G0306412800.01.T03 | Protein DETOXIFICATION                                                 |
| maker-3-augustus-gene-344.39-mRNA-1 | NA | NA       |               | Os06g0111700 | OsR498G0611496700.01.T01 | Protein DETOXIFICATION                                                 |
| maker-3-augustus-gene-344.45-mRNA-1 | NA | Indica   |               | Os03g0571700 | OsR498G0306415400.01.T01 | Protein DETOXIFICATION                                                 |
| maker-3-augustus-gene-344.48-mRNA-1 | NA | Indica   |               | Os03g0570800 | OsR498G0306415800.01.T02 | Protein DETOXIFICATION                                                 |
| maker-3-augustus-gene-345.0-mRNA-1  | NA | Japonica |               | Os03g0572250 | OsR498G1120379000.01.T02 | Cell division cycle-associated protein 7                               |
| maker-3-augustus-gene-345.2-mRNA-1  | NA | NA       |               | Os03g0572300 | OsR498G0306417600.01.T05 | VPS37 C-terminal domain-containing protein                             |
| maker-3-augustus-gene-345.5-mRNA-1  | NA | NA       |               | Os03g0572900 | OsR498G0306418600.01.T01 | Protein DETOXIFICATION                                                 |
| maker-3-augustus-gene-346.27-mRNA-1 | NA | NA       |               | 0            | OsR498G0306423400.01.T01 |                                                                        |
| maker-3-augustus-gene-346.29-mRNA-1 | NA | NA       |               | Os03g0574900 | OsR498G0306427000.01.T02 | Potassium transporter                                                  |
| maker-3-augustus-gene-346.34-mRNA-1 | NA | NA       |               | Os03g0575200 | OsR498G0306428400.01.T01 | Potassium transporter                                                  |
| maker-3-augustus-gene-347.41-mRNA-1 | NA | NA       |               | Os03g0576900 | OsR498G0306433700.01.T02 | Polyamine transporter RMV1                                             |
| maker-3-augustus-gene-347.43-mRNA-1 | NA | NA       |               | Os03g0577200 | OsR498G0306434900.01.T01 | MOB kinase activator-like 1                                            |
| maker-3-augustus-gene-347.48-mRNA-1 | NA | NA       |               | 0            | OsR498G0306431400.01.T02 |                                                                        |
| maker-3-augustus-gene-347.49-mRNA-1 | NA | NA       |               | Os03g0576200 | OsR498G0306432000.01.T01 | Potassium transporter                                                  |
| maker-3-augustus-gene-347.51-mRNA-1 | NA | Japonica |               | Os03g0576600 | OsR498G0815254000.01.T01 | ACB domain-containing protein (Fragment)                               |
| maker-3-augustus-gene-347.55-mRNA-1 | NA | NA       |               | Os03g0576700 | OsR498G0306433400.01.T01 | 60S ribosomal protein L13                                              |
| maker-3-augustus-gene-347.59-mRNA-1 | NA | NA       |               | Os03g0577000 | OsR498G0306434000.01.T01 | KH type-2 domain-containing protein (Fragment)                         |
| maker-3-augustus-gene-347.62-mRNA-1 | NA | NA       |               | Os03g0577100 | OsR498G0306434400.01.T02 | Nuf2 family protein, expressed                                         |
| maker-3-augustus-gene-347.67-mRNA-1 | NA | NA       |               | Os03g0577500 | OsR498G0306435600.01.T01 | Hexosyltransferase                                                     |
| maker-3-augustus-gene-348.0-mRNA-1  | NA | Japonica |               | Os03g0578900 | OsR498G0306440100.01.T01 | Myb domain protein 101                                                 |
| maker-3-augustus-gene-348.2-mRNA-1  | NA | NA       |               | Os03g0578200 | OsR498G0306437600.01.T02 |                                                                        |
| maker-3-augustus-gene-349.0-mRNA-1  | NA | NA       | LRR-NBS-TM    | 0            | OsR498G0306441900.01.T01 | Putative NBS-LRR type disease resistance protein                       |
| maker-3-augustus-gene-349.11-mRNA-1 | NA | NA       |               | 0            | OsR498G0306444400.01.T01 | GDSL esterase/lipase                                                   |
| maker-3-augustus-gene-349.13-mRNA-1 | NA | NA       |               | Os09g0443400 |                          | Transposon protein, putative, CACTA, En/Spm sub-class                  |
| maker-3-augustus-gene-349.14-mRNA-1 | NA | NA       |               | Os09g0443400 | OsR498G1220899000.01.T01 | Transposon protein, putative, CACTA, En/Spm sub-class                  |
| maker-3-augustus-gene-349.23-mRNA-1 | NA | NA       |               | Os03g0580800 | OsR498G0306446200.01.T01 | GDSL-like Lipase/Acylhydrolase family protein, expressed               |
| maker-3-augustus-gene-349.3-mRNA-1  | NA | NA       | CC-LRR-NBS-TM | 0            | OsR498G0306443900.01.T02 | Disease resistance protein RGA3                                        |
| maker-3-augustus-gene-349.6-mRNA-1  | NA | NA       |               | Os03g0337800 | OsR498G0306442600.01.T02 | Ribosomal protein L19                                                  |
| maker-3-augustus-gene-350.27-mRNA-1 | NA | Japonica |               | Os03g0581400 | OsR498G0306450100.01.T01 | GDSL-like Lipase/Acylhydrolase family protein, expressed               |
| maker-3-augustus-gene-350.29-mRNA-1 | NA | NA       |               |              |                          | QWRF motif-containing protein 3                                        |
| maker-3-augustus-gene-350.31-mRNA-1 | NA | Indica   |               | Os03g0581600 | OsR498G0306451100.01.T01 | Multiple organellar RNA editing factor 3 like                          |
| maker-3-augustus-gene-350.33-mRNA-1 | NA | NA       |               | 0            | OsR498G0306451300.01.T02 |                                                                        |
| maker-3-augustus-gene-350.40-mRNA-1 | NA | NA       |               | Os03g0582000 | OsR498G0306452500.01.T04 | Glutamate formimidoyltransferase                                       |
| maker-3-augustus-gene-350.42-mRNA-1 | NA | NA       |               | Os03g0582200 | OsR498G0306453400.01.T03 | Secretory carrier-associated membrane protein 4                        |
| maker-3-augustus-gene-351.0-mRNA-1  | NA | NA       |               | 0            | OsR498G1120154400.01.T01 |                                                                        |
| maker-3-augustus-gene-351.14-mRNA-1 | NA | Indica   |               | Os03g0582200 | OsR498G0306453600.01.T02 | Secretory carrier-associated membrane protein 4                        |
| maker-3-augustus-gene-351.17-mRNA-1 | NA | NA       |               | 0            | OsR498G0306456400.01.T04 |                                                                        |
| maker-3-augustus-gene-351.2-mRNA-1  | NA | NA       |               | 0            | OsR498G0917085900.01.T01 |                                                                        |



|                                     |    |          |            |              |                          |                                                                      |
|-------------------------------------|----|----------|------------|--------------|--------------------------|----------------------------------------------------------------------|
| maker-3-augustus-gene-351.20-mRNA-1 | NA | NA       | Kinase-TM  | Os03g0269300 | OsR498G0305649000.01.T01 | Proline-rich receptor-like protein kinase PERK3                      |
| maker-3-augustus-gene-351.22-mRNA-1 | NA | NA       |            |              |                          | Endoribonuclease Dicer 2                                             |
| maker-3-augustus-gene-351.32-mRNA-1 | NA | NA       |            | Os09g0315200 | OsR498G0917089000.01.T04 |                                                                      |
| maker-3-augustus-gene-351.4-mRNA-1  | NA | NA       |            | Os03g0583700 | OsR498G0917087500.01.T01 | Proteasome maturation factor UMP                                     |
| maker-3-augustus-gene-351.8-mRNA-1  | NA | NA       |            | Os03g0583800 | OsR498G0306460900.01.T06 | Peroxisomal membrane protein 2                                       |
| maker-3-augustus-gene-352.0-mRNA-1  | NA | NA       |            | Os03g0584300 | OsR498G0306462300.01.T02 | Adenosinetriphosphatase                                              |
| maker-3-augustus-gene-353.0-mRNA-1  | NA | NA       |            | Os03g0586500 | OsR498G0306466900.01.T01 | Post-illumination chlorophyll fluorescence increase                  |
| maker-3-augustus-gene-353.14-mRNA-1 | NA | Indica   |            | Os03g0587100 | OsR498G0306468500.01.T01 | Cytokinin riboside 5'-monophosphate phosphoribohydrolase             |
| maker-3-augustus-gene-353.16-mRNA-1 | NA | NA       |            | Os03g0586300 | OsR498G0306466600.01.T05 | Xyloglucanase 113 isoform 2                                          |
| maker-3-augustus-gene-353.21-mRNA-1 | NA | NA       |            | Os03g0586600 | OsR498G0306467200.01.T01 | DNA-directed RNA polymerases II IV and V subunit 6A                  |
| maker-3-augustus-gene-353.24-mRNA-1 | NA | NA       |            | Os03g0586700 | OsR498G0306467600.01.T01 | Paladin                                                              |
| maker-3-augustus-gene-353.30-mRNA-1 | NA | NA       |            | Os03g0586800 | OsR498G0306468000.01.T02 | Lysine--tRNA ligase                                                  |
| maker-3-augustus-gene-353.34-mRNA-1 | NA | NA       |            | Os03g0587200 | OsR498G0306468800.01.T01 | Putative plus-end-directed kinesin ATPase                            |
| maker-3-augustus-gene-353.9-mRNA-1  | NA | NA       |            | Os03g0587000 | OsR498G0306468300.01.T01 | Inositol-1-monophosphatase                                           |
| maker-3-augustus-gene-354.39-mRNA-1 | NA | NA       |            | Os03g0588600 | OsR498G0306474500.01.T01 |                                                                      |
| maker-3-augustus-gene-354.41-mRNA-1 | NA | Indica   |            | Os03g0588700 | OsR498G0306474900.01.T01 |                                                                      |
| maker-3-augustus-gene-354.45-mRNA-1 | NA | NA       |            | Os03g0589300 | OsR498G0306477000.01.T02 | OTU domain-containing                                                |
| maker-3-augustus-gene-356.0-mRNA-1  | NA | NA       |            | 0            | OsR498G0917123900.01.T01 |                                                                      |
| maker-3-augustus-gene-356.3-mRNA-1  | NA | NA       |            | Os03g0592500 | OsR498G0306485300.01.T02 | Chlorophyll a-b binding protein, chloroplastic                       |
| maker-3-augustus-gene-356.5-mRNA-1  | NA | NA       |            | 0            | OsR498G0306483000.01.T01 | Pentatricopeptide, putative                                          |
| maker-3-augustus-gene-357.0-mRNA-1  | NA | NA       |            | Os03g0593600 | OsR498G0306487100.01.T01 | Ent-cassadiene C2-hydroxylase                                        |
| maker-3-augustus-gene-357.12-mRNA-1 | NA | NA       |            | Os03g0594400 | OsR498G0306491600.01.T01 | Sugar carrier protein C                                              |
| maker-3-augustus-gene-357.14-mRNA-1 | NA | NA       |            | Os03g0594700 | OsR498G0306492800.01.T01 | DUF862 domain-containing protein                                     |
| maker-3-augustus-gene-357.2-mRNA-1  | NA | NA       |            | Os03g0594100 | OsR498G0306490700.01.T01 | Ent-isokaurene C2-hydroxylase                                        |
| maker-3-augustus-gene-357.4-mRNA-1  | NA | NA       |            | 0            | OsR498G0611818300.01.T01 | PLAT domain-containing protein                                       |
| maker-3-augustus-gene-357.6-mRNA-1  | NA | Indica   |            | Os03g0593200 | OsR498G0306486600.01.T01 | DUF21 domain-containing protein chloroplastic                        |
| maker-3-augustus-gene-358.0-mRNA-1  | NA | NA       |            | Os03g0594900 | OsR498G0306492900.01.T01 | Ent-isokaurene C2-hydroxylase                                        |
| maker-3-augustus-gene-358.10-mRNA-1 | NA | NA       |            | 0            | OsR498G0306496600.01.T04 | Factor of DNA methylation 1                                          |
| maker-3-augustus-gene-358.4-mRNA-1  | NA | NA       |            | Os03g0595600 | OsR498G0306494800.01.T01 | Glutathione S-transferase GST 24                                     |
| maker-3-augustus-gene-358.6-mRNA-1  | NA | NA       |            | 0            | OsR498G0306495200.01.T02 | Carrier domain-containing protein                                    |
| maker-3-augustus-gene-358.8-mRNA-1  | NA | NA       |            | Os03g0596400 |                          | XH domain containing protein, expressed                              |
| maker-3-augustus-gene-359.37-mRNA-1 | NA | NA       |            | Os03g0598100 | OsR498G0306502700.01.T05 | Amino acid binding protein, putative                                 |
| maker-3-augustus-gene-359.41-mRNA-1 | NA | Japonica |            | Os03g0596800 | OsR498G0306498400.01.T01 | TF-B3 domain-containing protein                                      |
| maker-3-augustus-gene-359.43-mRNA-1 | NA | NA       |            | Os03g0596900 | OsR498G0306498800.01.T05 | DEK domain-containing chromatin associated protein                   |
| maker-3-augustus-gene-359.50-mRNA-1 | NA | Indica   |            | Os03g0597600 | OsR498G0306500800.01.T02 | Isoaspartyl peptidase/L-asparaginase 1 subunit beta like             |
| maker-3-augustus-gene-359.55-mRNA-1 | NA | NA       |            | Os03g0598200 | OsR498G0306503000.01.T01 | Nucleolar protein 14                                                 |
| maker-3-augustus-gene-359.60-mRNA-1 | NA | NA       |            | 0            | OsR498G0306503400.01.T01 | Usp domain-containing protein (Fragment)                             |
| maker-3-augustus-gene-360.23-mRNA-1 | NA | Indica   |            | Os03g0365200 | OsR498G0306004300.01.T01 | Ulp1 protease family, C-terminal catalytic domain containing protein |
| maker-3-augustus-gene-360.26-mRNA-1 | NA | NA       |            | Os03g0598700 | OsR498G0306505500.01.T02 | E3 ubiquitin-protein ligase                                          |
| maker-3-augustus-gene-360.35-mRNA-1 | NA | NA       |            |              |                          |                                                                      |
| maker-3-augustus-gene-360.38-mRNA-1 | NA | NA       |            | Os03g0598800 | OsR498G0306506000.01.T01 | Ribosomal protein L15                                                |
| maker-3-augustus-gene-360.42-mRNA-1 | NA | NA       |            | 0            | OsR498G0306506200.01.T02 | DSBA oxidoreductase family protein isoform 2                         |
| maker-3-augustus-gene-360.49-mRNA-1 | NA | Japonica | LRR-NBS-TM | Os03g0599000 | OsR498G0306507000.01.T01 | NB-ARC domain-containing protein                                     |
| maker-3-augustus-gene-360.51-mRNA-1 | NA | Japonica |            | Os03g0599800 | OsR498G0306508200.01.T02 | UDP-arabinopyranose mutase                                           |
| maker-3-augustus-gene-361.0-mRNA-1  | NA | NA       |            | Os03g0601500 | OsR498G0306512300.01.T01 |                                                                      |
| maker-3-augustus-gene-361.2-mRNA-1  | NA | NA       |            |              |                          | RRM domain-containing protein                                        |
| maker-3-augustus-gene-361.4-mRNA-1  | NA | Japonica |            | Os03g0600500 | OsR498G1018781700.01.T01 | Glucan endo-1,3-beta-glucosidase GII                                 |
| maker-3-augustus-gene-361.6-mRNA-1  | NA | NA       |            | 0            | OsR498G0306511400.01.T01 | DUF295 domain-containing protein (Fragment)                          |
| maker-3-augustus-gene-362.4-mRNA-1  | NA | NA       |            | 0            | OsR498G0306516900.01.T05 | Fructokinase-like protein 2, chloroplastic                           |
| maker-3-augustus-gene-362.6-mRNA-1  | NA | Indica   |            | Os03g0603100 | OsR498G0306519600.01.T01 | Cytochrome P450, E-class, group I                                    |
| maker-3-augustus-gene-363.0-mRNA-1  | NA | NA       |            | Os03g0603600 | OsR498G0306522300.01.T01 | Glycerophosphodiester phosphodiesterase                              |
| maker-3-augustus-gene-363.4-mRNA-1  | NA | NA       |            |              |                          |                                                                      |
| maker-3-augustus-gene-363.6-mRNA-1  | NA | Japonica |            | Os03g0604500 | OsR498G0306524700.01.T01 | Keratin, type II cytoskeletal 2 epidermal-like                       |
| maker-3-augustus-gene-363.8-mRNA-1  | NA | NA       |            | 0            | OsR498G0306525000.01.T01 |                                                                      |
| maker-3-augustus-gene-364.0-mRNA-1  | NA | Japonica |            | Os03g0606100 | OsR498G0306528600.01.T04 | Lipase, putative, expressed                                          |
| maker-3-augustus-gene-365.36-mRNA-1 | NA | Indica   |            | Os12g0581700 | OsR498G0306532100.01.T01 | Seed maturation protein PM23, putative, expressed                    |
| maker-3-augustus-gene-365.40-mRNA-1 | NA | NA       |            | Os03g0607600 | OsR498G0306537300.01.T01 | Cyclin N-terminal domain-containing protein (Fragment)               |
| maker-3-augustus-gene-365.46-mRNA-1 | NA | Indica   |            | Os12g0581600 | OsR498G0306532000.01.T01 | Metal transporter Nramp3                                             |
| maker-3-augustus-gene-365.59-mRNA-1 | NA | NA       |            | Os03g0607800 | OsR498G0306538000.01.T01 | LisH domain-containing protein                                       |
| maker-3-augustus-gene-365.62-mRNA-1 | NA | NA       |            | 0            | OsR498G0306540800.01.T03 |                                                                      |
| maker-3-augustus-gene-366.0-mRNA-1  | NA | NA       |            | Os03g0608800 | OsR498G0306542700.01.T04 |                                                                      |

|                                     |    |          |           |              |                          |                                                                        |
|-------------------------------------|----|----------|-----------|--------------|--------------------------|------------------------------------------------------------------------|
| maker-3-augustus-gene-366.5-mRNA-1  | NA | Indica   |           | Os07g0477000 | OsR498G0306543500.01.T01 | RNA polymerase Rpb7 N-terminal domain-containing protein               |
| maker-3-augustus-gene-366.7-mRNA-1  | NA | NA       |           | Os03g0609500 | OsR498G0306544400.01.T01 | LOB domain-containing protein 37                                       |
| maker-3-augustus-gene-366.9-mRNA-1  | NA | NA       |           | Os03g0609800 | OsR498G0306545400.01.T01 | BTB/POZ domain-containing protein NPY2                                 |
| maker-3-augustus-gene-367.0-mRNA-1  | NA | Indica   |           | Os03g0610800 | OsR498G0306548700.01.T01 | SERPIN domain-containing protein (Fragment)                            |
| maker-3-augustus-gene-367.14-mRNA-1 | NA | NA       |           |              |                          | Primosome PriB/single-strand DNA-binding protein                       |
| maker-3-augustus-gene-367.2-mRNA-1  | NA | NA       |           |              |                          | SERPIN domain-containing protein (Fragment)                            |
| maker-3-augustus-gene-367.4-mRNA-1  | NA | NA       |           | Os03g0611200 | OsR498G0306550700.01.T05 | Putative aldo/keto reductase, NADP-dependent oxidoreductase domain-con |
| maker-3-augustus-gene-367.9-mRNA-1  | NA | Indica   | Kinase-TM | Os03g0610900 | OsR498G0306549800.01.T02 | Serine/threonine-protein kinase SAPK10                                 |
| maker-3-augustus-gene-368.41-mRNA-1 | NA | NA       |           | 0            | OsR498G0306554000.01.T02 | Ribosomal protein L25/Gln-tRNA synthetase, anti-codon-binding domain   |
| maker-3-augustus-gene-368.44-mRNA-1 | NA | Japonica |           | Os03g0615700 | OsR498G0102477000.01.T01 | GRF zinc finger family protein, expressed                              |
| maker-3-augustus-gene-368.46-mRNA-1 | NA | NA       |           | 0            | OsR498G0306556200.01.T01 | ARF guanine-nucleotide exchange factor GNOM                            |
| maker-3-augustus-gene-369.27-mRNA-1 | NA | Japonica |           | Os03g0615700 | OsR498G0102477000.01.T01 | GRF zinc finger family protein, expressed                              |
| maker-3-augustus-gene-370.0-mRNA-1  | NA | NA       |           | 0            | OsR498G0306562700.01.T05 | DNA polymerase kappa                                                   |
| maker-3-augustus-gene-370.10-mRNA-1 | NA | Japonica |           | Os03g0616600 | OsR498G0306563600.01.T01 | Condensin-2 complex subunit like                                       |
| maker-3-augustus-gene-370.12-mRNA-1 | NA | NA       |           | 0            | OsR498G0306564400.01.T01 | Importin N-terminal domain-containing protein                          |
| maker-3-augustus-gene-370.6-mRNA-1  | NA | NA       |           | Os03g0616400 | OsR498G0306563100.01.T01 | Calcium-transporting ATPase                                            |
| maker-3-augustus-gene-371.47-mRNA-1 | NA | Indica   |           | Os05g0556700 | OsR498G0306571500.01.T02 | CCT-beta                                                               |
| maker-3-augustus-gene-371.52-mRNA-1 | NA | NA       |           | Os03g0619600 | OsR498G0306571700.01.T01 | B3 domain-containing protein (Fragment)                                |
| maker-3-augustus-gene-371.54-mRNA-1 | NA | NA       |           | Os03g0617500 | OsR498G0306566200.01.T01 | Cyclin N-terminal domain-containing protein                            |
| maker-3-augustus-gene-371.57-mRNA-1 | NA | Japonica |           | Os03g0617800 | OsR498G0306568000.01.T01 | Transcription factor bHLH84 like                                       |
| maker-3-augustus-gene-371.59-mRNA-1 | NA | Japonica |           | Os03g0617900 | OsR498G1018971300.01.T01 | Probable N-acetyl-gamma-glutamyl-phosphate reductase, chloroplastic    |
| maker-3-augustus-gene-371.64-mRNA-1 | NA | NA       |           | Os03g0618300 | OsR498G0306569000.01.T01 | Naringenin,2-oxoglutarate 3-dioxygenase                                |
| maker-3-augustus-gene-371.68-mRNA-1 | NA | NA       |           | Os05g0168200 | OsR498G0509819800.01.T01 | PGG domain-containing protein                                          |
| maker-3-augustus-gene-372.0-mRNA-1  | NA | NA       |           | 0            | OsR498G0306572300.01.T01 | B3 domain-containing protein                                           |
| maker-3-augustus-gene-372.12-mRNA-1 | NA | NA       |           | Os03g0621600 | OsR498G0306575900.01.T01 | TF-B3 domain-containing protein                                        |
| maker-3-augustus-gene-372.19-mRNA-1 | NA | NA       |           | Os03g0620800 | OsR498G0306574600.01.T02 | SEC1 family transport protein SLY1                                     |
| maker-3-augustus-gene-372.21-mRNA-1 | NA | NA       |           |              |                          | ATP-dependent DNA helicase                                             |
| maker-3-augustus-gene-372.3-mRNA-1  | NA | NA       | TIR       | Os03g0620400 | OsR498G0306573300.01.T02 | B3 domain-containing protein (Fragment)                                |
| maker-3-augustus-gene-372.8-mRNA-1  | NA | Indica   |           | Os02g0494400 | OsR498G0306575100.01.T02 | Heat shock protein STI                                                 |
| maker-3-augustus-gene-373.0-mRNA-1  | NA | NA       |           | Os03g0622100 | OsR498G0306578700.01.T01 | Putative B3 domain-containing protein (Fragment)                       |
| maker-3-augustus-gene-373.7-mRNA-1  | NA | Japonica |           | Os03g0622300 | OsR498G1222012100.01.T02 |                                                                        |
| maker-3-augustus-gene-374.4-mRNA-1  | NA | NA       |           | Os09g0348800 | OsR498G1221562500.01.T04 | Proline rich coiled-coil 2C                                            |
| maker-3-augustus-gene-375.29-mRNA-1 | NA | NA       |           | Os03g0626600 | OsR498G0306596100.01.T06 | LIM zinc-binding domain-containing protein                             |
| maker-3-augustus-gene-384.41-mRNA-1 | NA | Indica   |           | Os12g0613250 | OsR498G0306644400.01.T01 | BTB/POZ domain-containing protein At1g30440                            |
| maker-3-augustus-gene-387.22-mRNA-1 | NA | Indica   |           | Os03g0647500 | OsR498G0306667400.01.T01 | CP-type G domain-containing protein                                    |
| maker-3-augustus-gene-389.0-mRNA-1  | NA | NA       |           | Os03g0650000 | OsR498G0306675300.01.T04 | YABBY transcription factor                                             |
| maker-3-augustus-gene-389.11-mRNA-1 | NA | Japonica |           | Os03g0650800 | OsR498G0306680500.01.T01 | Zein-binding domain-containing protein                                 |
| maker-3-augustus-gene-389.17-mRNA-1 | NA | NA       |           | Os03g0650900 | OsR498G0306680800.01.T02 | RING-type E3 ubiquitin transferase                                     |
| maker-3-augustus-gene-39.19-mRNA-1  | NA | NA       |           | Os03g0180300 | OsR498G0305328700.01.T05 | Smr domain-containing protein                                          |
| maker-3-augustus-gene-39.23-mRNA-1  | NA | NA       |           | 0            | OsR498G0305321800.01.T02 | Putative copper-transporting ATPase PAA1                               |
| maker-3-augustus-gene-39.6-mRNA-1   | NA | NA       |           |              |                          | Tubulin--tyrosine ligase-like protein 12                               |
| maker-3-augustus-gene-392.27-mRNA-1 | NA | NA       |           | 0            | OsR498G0306696300.01.T01 | Cysteine dioxygenase                                                   |
| maker-3-augustus-gene-392.29-mRNA-1 | NA | NA       |           | 0            | OsR498G0306696900.01.T01 | CS domain                                                              |
| maker-3-augustus-gene-392.50-mRNA-1 | NA | NA       |           | 0            | OsR498G0306694400.01.T02 | Chlorophyllide b reductase NOLic isoform X2                            |
| maker-3-augustus-gene-392.53-mRNA-1 | NA | NA       |           | Os03g0654700 | OsR498G0306694600.01.T01 | Cysteine dioxygenase                                                   |
| maker-3-augustus-gene-392.55-mRNA-1 | NA | NA       |           | Os03g0655200 | OsR498G0306696800.01.T02 | Membrin                                                                |
| maker-3-augustus-gene-393.0-mRNA-1  | NA | NA       |           | Os03g0655600 |                          | Putative far-red impaired response protein                             |
| maker-3-augustus-gene-393.18-mRNA-1 | NA | NA       |           | Os03g0656000 | OsR498G0306699600.01.T01 | SHSP domain-containing protein (Fragment)                              |
| maker-3-augustus-gene-393.2-mRNA-1  | NA | NA       |           |              |                          | 3-isopropylmalate dehydrogenase                                        |
| maker-3-augustus-gene-393.21-mRNA-1 | NA | NA       |           | Os03g0656201 | OsR498G0306701000.01.T01 | DnaJ/Hsp40 cysteine-rich domain superfamily protein (Fragment)         |
| maker-3-augustus-gene-393.23-mRNA-1 | NA | NA       |           | Os03g0657400 | OsR498G0306705400.01.T01 | WRKY transcription factor 60                                           |
| maker-3-augustus-gene-393.7-mRNA-1  | NA | NA       |           | Os03g0656800 | OsR498G0306703500.01.T01 | Glucan endo-1,3-beta-D-glucosidase                                     |
| maker-3-augustus-gene-393.9-mRNA-1  | NA | NA       |           | Os03g0656900 | OsR498G0306703700.01.T01 | NusB antitermination factor                                            |
| maker-3-augustus-gene-394.0-mRNA-1  | NA | NA       |           | Os03g0658100 |                          | Cytochrome P450, family 87, subfamily A, polypeptide 2                 |
| maker-3-augustus-gene-394.3-mRNA-1  | NA | NA       |           | Os03g0658800 | OsR498G0306712000.01.T03 | Cytochrome P450 family protein, expressed                              |
| maker-3-augustus-gene-395.0-mRNA-1  | NA | NA       |           |              |                          | Benzyl alcohol O-benzoyltransferase                                    |
| maker-3-augustus-gene-395.11-mRNA-1 | NA | NA       |           | 0            | OsR498G0306718000.01.T02 | Interactor of constitutive active ROPs 2                               |
| maker-3-augustus-gene-395.15-mRNA-1 | NA | NA       |           | Os03g0659900 | OsR498G0306718200.01.T01 | Membralin like                                                         |
| maker-3-augustus-gene-395.20-mRNA-1 | NA | NA       |           | 0            | OsR498G0306743300.01.T01 | Hydroxyproline-rich glycoprotein-like                                  |
| maker-3-augustus-gene-395.4-mRNA-1  | NA | NA       |           | Os03g0659300 | OsR498G0306714600.01.T03 | VOC domain-containing protein (Fragment)                               |
| maker-3-augustus-gene-395.7-mRNA-1  | NA | NA       |           | Os03g0659400 | OsR498G0306714800.01.T01 | DWNN domain a CCHC-type zinc finger                                    |

|                                     |    |          |               |              |                          |                                                                               |
|-------------------------------------|----|----------|---------------|--------------|--------------------------|-------------------------------------------------------------------------------|
| maker-3-augustus-gene-396.0-mRNA-1  | NA | NA       |               | Os03g0661300 | OsR498G0306725900.01.T01 | Tubulin beta chain                                                            |
| maker-3-augustus-gene-396.4-mRNA-1  | NA | Indica   |               | Os03g0660700 | OsR498G0306722400.01.T01 |                                                                               |
| maker-3-augustus-gene-397.37-mRNA-1 | NA | NA       |               | Os03g0663100 | OsR498G0306730500.01.T03 | PDZ domain-containing protein                                                 |
| maker-3-augustus-gene-397.40-mRNA-1 | NA | NA       |               | 0            | OsR498G0306735500.01.T06 | Type IV inositol polyphosphate 5-phosphatase 7                                |
| maker-3-augustus-gene-397.44-mRNA-1 | NA | NA       |               | Os03g0661800 | OsR498G0306729000.01.T04 | PDZ domain-containing protein                                                 |
| maker-3-augustus-gene-397.48-mRNA-1 | NA | NA       |               | Os03g0663800 |                          | Vicilin-like embryo storage protein                                           |
| maker-3-augustus-gene-397.50-mRNA-1 | NA | NA       |               | Os03g0663900 | OsR498G0306736000.01.T01 | AAI domain-containing protein (Fragment)                                      |
| maker-3-augustus-gene-398.38-mRNA-1 | NA | NA       |               | 0            | OsR498G0306737900.01.T01 | AAI domain-containing protein                                                 |
| maker-3-augustus-gene-398.40-mRNA-1 | NA | NA       |               | Os03g0664700 | OsR498G0306738200.01.T02 | RNA polymerase II accessory factor                                            |
| maker-3-augustus-gene-398.42-mRNA-1 | NA | NA       |               | Os03g0665200 | OsR498G0306740400.01.T02 | FLZ-type domain-containing protein (Fragment)                                 |
| maker-3-augustus-gene-399.38-mRNA-1 | NA | NA       |               | Os03g0665800 | OsR498G0306744300.01.T02 | Armadillo/beta-catenin-like repeat protein                                    |
| maker-3-augustus-gene-399.42-mRNA-1 | NA | Indica   |               | Os03g0666100 | OsR498G0306745100.01.T01 | ARF guanine-nucleotide exchange factor GNOM                                   |
| maker-3-augustus-gene-399.44-mRNA-1 | NA | NA       |               | 0            | OsR498G0306745700.01.T01 | Myb-like domain-containing protein                                            |
| maker-3-augustus-gene-399.47-mRNA-1 | NA | NA       |               | Os03g0666500 | OsR498G0306746900.01.T04 | Ras-related protein RHN1                                                      |
| maker-3-augustus-gene-399.48-mRNA-1 | NA | Indica   |               | Os03g0666500 | OsR498G0306746900.01.T03 | Ras-related protein RHN1                                                      |
| maker-3-augustus-gene-399.52-mRNA-1 | NA | NA       |               | Os05g0394100 |                          | Glutathione S-transferase T3-like                                             |
| maker-3-augustus-gene-399.54-mRNA-1 | NA | NA       |               | Os03g0666200 | OsR498G0306745400.01.T02 | Calcium-binding and coiled-coil domain-containing protein 1 isoform X1        |
| maker-3-augustus-gene-399.58-mRNA-1 | NA | NA       |               | Os03g0666700 | OsR498G0306747400.01.T01 | TRAM LAG1 and CLN8 (TLC) lipid-sensing domain containing protein              |
| maker-3-augustus-gene-399.63-mRNA-1 | NA | Indica   |               | Os03g0666850 | OsR498G0306747800.01.T06 |                                                                               |
| maker-3-augustus-gene-399.64-mRNA-1 | NA | NA       |               | Os03g0667100 | OsR498G0306749000.01.T07 | BTB/POZ domain and ankyrin repeat-containing protein NPR3                     |
| maker-3-augustus-gene-399.69-mRNA-1 | NA | NA       |               | Os03g0667300 | OsR498G0306751200.01.T01 | Fe(2+) transport protein 2                                                    |
| maker-3-augustus-gene-4.57-mRNA-1   | NA | NA       |               | 0            | OsR498G0407881700.01.T01 | Transposon protein, putative, Mutator sub-class, expressed                    |
| maker-3-augustus-gene-40.32-mRNA-1  | NA | Japonica |               | Os03g0180600 | OsR498G0305329500.01.T01 |                                                                               |
| maker-3-augustus-gene-40.48-mRNA-1  | NA | NA       |               | Os03g0180400 | OsR498G0305329000.01.T01 | Proteasome endopeptidase complex                                              |
| maker-3-augustus-gene-40.53-mRNA-1  | NA | NA       |               | 0            | OsR498G0612877000.01.T03 | UDP-glycosyltransferase TURAN                                                 |
| maker-3-augustus-gene-40.62-mRNA-1  | NA | NA       |               | Os01g0175300 | OsR498G0510826100.01.T01 | ATP-dependent DNA helicase                                                    |
| maker-3-augustus-gene-400.0-mRNA-1  | NA | NA       |               | Os03g0668000 | OsR498G0306754100.01.T02 | F-box domain containing protein, expressed                                    |
| maker-3-augustus-gene-400.10-mRNA-1 | NA | NA       |               | 0            | OsR498G0306752200.01.T02 | RanBD1 domain-containing protein                                              |
| maker-3-augustus-gene-400.16-mRNA-1 | NA | Indica   |               | Os03g0667800 | OsR498G0306753800.01.T01 | 40S ribosomal protein S21                                                     |
| maker-3-augustus-gene-400.3-mRNA-1  | NA | NA       | CC-LRR-NBS-TM | 0            | OsR498G0306756300.01.T01 | ITF-type domain-containing protein                                            |
| maker-3-augustus-gene-400.5-mRNA-1  | NA | NA       |               | 0            | OsR498G0306759300.01.T01 | BOI-related E3 ubiquitin-protein ligase 1                                     |
| maker-3-augustus-gene-400.7-mRNA-1  | NA | NA       |               | Os03g0668900 | OsR498G0306760300.01.T01 | Acidic leucine-rich nuclear phosphoprotein 32 family member A                 |
| maker-3-augustus-gene-401.0-mRNA-1  | NA | Indica   |               | Os03g0669800 | OsR498G0306763100.01.T01 | Phosphoinositide binding                                                      |
| maker-3-augustus-gene-401.15-mRNA-1 | NA | NA       |               | 0            | OsR498G0306761400.01.T01 | Guanine nucleotide-binding protein subunit beta                               |
| maker-3-augustus-gene-401.23-mRNA-1 | NA | Indica   |               | Os03g0722500 | OsR498G0306761600.01.T01 | (1->3)-beta-glucan endohydrolase                                              |
| maker-3-augustus-gene-401.26-mRNA-1 | NA | Japonica |               | Os03g0669700 | OsR498G0306762800.01.T01 | F-box domain-containing protein (Fragment)                                    |
| maker-3-augustus-gene-401.28-mRNA-1 | NA | NA       | NBS           | Os03g0670100 | OsR498G0306764000.01.T02 | Protein TRIGALACTOSYLDIACYLGLYCEROL 3 chloroplastic                           |
| maker-3-augustus-gene-401.3-mRNA-1  | NA | NA       |               | Os03g0670200 | OsR498G0306764100.01.T03 | GPI mannosyltransferase 1                                                     |
| maker-3-augustus-gene-401.8-mRNA-1  | NA | NA       |               | Os03g0669000 | OsR498G0306760600.01.T02 | DEAD-box ATP-dependent RNA helicase 10                                        |
| maker-3-augustus-gene-41.68-mRNA-1  | NA | Indica   |               | Os10g0390500 | OsR498G0305341400.01.T04 | Alanine aminotransferase                                                      |
| maker-3-augustus-gene-411.45-mRNA-1 | NA | NA       |               | Os03g0688200 | OsR498G0306828100.01.T01 |                                                                               |
| maker-3-augustus-gene-413.25-mRNA-1 | NA | NA       |               | Os03g0691400 | OsR498G0306843600.01.T01 | 4HBT domain-containing protein                                                |
| maker-3-augustus-gene-421.29-mRNA-1 | NA | NA       |               | Os03g0706900 | OsR498G0306899000.01.T03 | Transmembrane Fragile-X-F-associated protein isoform 1                        |
| maker-3-augustus-gene-428.14-mRNA-1 | NA | NA       |               | Os03g0718000 | OsR498G0306937800.01.T02 | Anthranilate synthase/para-aminobenzoate synthase, glutamine amidotransferase |
| maker-3-augustus-gene-428.18-mRNA-1 | NA | NA       |               | 0            | OsR498G0306941400.01.T01 | Cytochrome c oxidase assembly protein ctaG                                    |
| maker-3-augustus-gene-428.22-mRNA-1 | NA | NA       |               |              |                          | Putative calcium-binding protein CML27                                        |
| maker-3-augustus-gene-428.6-mRNA-1  | NA | NA       |               | Os03g0718100 | OsR498G0306938500.01.T02 | Actin-1 isoform A                                                             |
| maker-3-augustus-gene-437.10-mRNA-1 | NA | Japonica |               | Os03g0732000 | OsR498G0306991800.01.T01 | Hydroxymethylbutenyl diphosphate reductase                                    |
| maker-3-augustus-gene-440.24-mRNA-1 | NA | NA       |               | Os03g0738400 | OsR498G0307011500.01.T02 | Glycine hydroxymethyltransferase                                              |
| maker-3-augustus-gene-440.29-mRNA-1 | NA | NA       |               | Os03g0738900 | OsR498G0307014300.01.T01 | Phototropic-responsive NPH3 family protein isoform 2                          |
| maker-3-augustus-gene-443.4-mRNA-1  | NA | NA       |               |              |                          | Protein kinase domain-containing protein                                      |
| maker-3-augustus-gene-443.6-mRNA-1  | NA | NA       |               | Os03g0745600 | OsR498G0307037100.01.T01 | Transmembrane BAX inhibitor motif-containing protein 4                        |
| maker-3-augustus-gene-444.40-mRNA-1 | NA | Indica   | Kinase-TM     | Os03g0745700 | OsR498G0307037500.01.T01 | Serinethreonine-protein kinase sty17                                          |
| maker-3-augustus-gene-444.52-mRNA-1 | NA | NA       |               | Os03g0746500 | OsR498G0307041000.01.T04 | DEXH-box ATP-dependent RNA helicase DEXH16 mitochondrial                      |
| maker-3-augustus-gene-448.24-mRNA-1 | NA | NA       |               |              |                          | Bzip-like transcription factor-like                                           |
| maker-3-augustus-gene-448.26-mRNA-1 | NA | NA       |               | Os03g0753500 | OsR498G0307062200.01.T01 |                                                                               |
| maker-3-augustus-gene-455.20-mRNA-1 | NA | NA       |               | 0            | OsR498G0100693500.01.T01 | Epstein-Barr virus EBNA-1-like                                                |
| maker-3-augustus-gene-462.50-mRNA-1 | NA | NA       |               | 0            | OsR498G0307151900.01.T01 | Inosine-5'-monophosphate dehydrogenase                                        |
| maker-3-augustus-gene-462.56-mRNA-1 | NA | NA       |               | Os03g0780800 | OsR498G0307152900.01.T04 | Aldehyde oxygenase (deformylating)                                            |
| maker-3-augustus-gene-462.59-mRNA-1 | NA | NA       |               |              |                          | Transcription factor PIF5                                                     |
| maker-3-augustus-gene-462.67-mRNA-1 | NA | NA       |               | Os03g0780400 | OsR498G0307151600.01.T03 | Actin-depolymerizing factor                                                   |

|                                     |    |          |              |                          |                                                          |
|-------------------------------------|----|----------|--------------|--------------------------|----------------------------------------------------------|
| maker-3-augustus-gene-462.69-mRNA-1 | NA | NA       | Os03g0780900 | OsR498G0307153200.01.T01 | Alpha amino-terminal protein methyltransferase           |
| maker-3-augustus-gene-462.75-mRNA-1 | NA | NA       | 0            | OsR498G0307153400.01.T01 | GTP-dependent nucleic acid-binding protein engD          |
| maker-3-augustus-gene-462.82-mRNA-1 | NA | NA       | Os03g0781300 | OsR498G0307154000.01.T01 | Ribose-5-phosphate isomerase                             |
| maker-3-augustus-gene-462.84-mRNA-1 | NA | NA       | Os03g0781400 | OsR498G0307154200.01.T04 | Ribose-5-phosphate isomerase                             |
| maker-3-augustus-gene-462.87-mRNA-1 | NA | NA       | Os03g0781700 | OsR498G0307154800.01.T03 | Reticulon-like protein (Fragment)                        |
| maker-3-augustus-gene-469.9-mRNA-1  | NA | NA       | Os03g0795500 | OsR498G0307198700.01.T01 | PITH domain-containing protein isoform A                 |
| maker-3-augustus-gene-470.28-mRNA-1 | NA | NA       | Os03g0797400 | OsR498G0307211000.01.T02 | Tryptophan synthase                                      |
| maker-3-augustus-gene-472.13-mRNA-1 | NA | NA       |              |                          | serine/threonine-protein phosphatase 7 long form homolog |
| maker-3-augustus-gene-473.75-mRNA-1 | NA | NA       | 0            | OsR498G0307228600.01.T01 | Fe2OG dioxygenase domain-containing protein              |
| maker-3-augustus-gene-473.77-mRNA-1 | NA | Indica   | Os07g0194500 | OsR498G0307229000.01.T01 | Prolyl 4-hydroxylase 4                                   |
| maker-3-augustus-gene-473.80-mRNA-1 | NA | NA       | Os03g0803500 | OsR498G0307229200.01.T02 | Procollagen-proline 4-dioxygenase                        |
| maker-3-augustus-gene-473.82-mRNA-1 | NA | Indica   | Os03g0803900 | OsR498G0307229400.01.T04 | Galectin domain-containing protein (Fragment)            |
| maker-3-augustus-gene-473.87-mRNA-1 | NA | NA       | 0            | OsR498G0307229600.01.T02 | Histidine kinase/DNA gyrase B                            |
| maker-3-augustus-gene-474.36-mRNA-1 | NA | NA       | Os03g0804100 | OsR498G0307230100.01.T03 | ATP-dependent DNA helicase (Fragment)                    |
| maker-3-augustus-gene-474.41-mRNA-1 | NA | Indica   | Os03g0804200 | OsR498G0307230500.01.T01 | AAI domain-containing protein                            |
| maker-3-augustus-gene-474.43-mRNA-1 | NA | Indica   | Os03g0804400 | OsR498G0307231300.01.T01 | Exocyst complex component EXO84B                         |
| maker-3-augustus-gene-474.49-mRNA-1 | NA | NA       | Os03g0804800 | OsR498G0307232500.01.T01 | CCT-theta                                                |
| maker-3-augustus-gene-474.54-mRNA-1 | NA | NA       | Os03g0805100 | OsR498G0307233300.01.T06 | Squalene synthetase                                      |
| maker-3-augustus-gene-474.60-mRNA-1 | NA | NA       | Os03g0805300 | OsR498G0307234100.01.T02 | Serine/threonine-protein phosphatase                     |
| maker-3-augustus-gene-474.68-mRNA-1 | NA | Indica   | Os03g0805700 | OsR498G0307235100.01.T01 | Cell death suppressor protein Lls1, putative, expressed  |
| maker-3-augustus-gene-474.79-mRNA-1 | NA | NA       | Os03g0804300 | OsR498G0307231000.01.T04 | S-acyltransferase                                        |
| maker-3-augustus-gene-474.84-mRNA-1 | NA | Japonica | Os03g0804650 | OsR498G0307232000.01.T01 | Cupin type-1 domain-containing protein (Fragment)        |
| maker-3-augustus-gene-474.87-mRNA-1 | NA | NA       | Os03g0804900 | OsR498G0307233000.01.T01 | Glycosyltransferase                                      |
| maker-3-augustus-gene-474.89-mRNA-1 | NA | NA       | Os03g0805200 | OsR498G0307233600.01.T01 | DEAD-box ATP-dependent RNA helicase 37                   |
| maker-3-augustus-gene-474.93-mRNA-1 | NA | NA       | Os03g0805400 | OsR498G0307234400.01.T01 | Lipid phosphate phosphatase delta                        |
| maker-3-augustus-gene-474.97-mRNA-1 | NA | NA       | Os03g0805500 | OsR498G0307234600.01.T01 | Acyl-activating enzyme 18                                |
| maker-3-augustus-gene-475.0-mRNA-1  | NA | Japonica | Os03g0805700 | OsR498G0307236100.01.T01 | PaO domain-containing protein                            |
| maker-3-augustus-gene-475.12-mRNA-1 | NA | Indica   | Os03g0805900 | OsR498G0307236100.01.T01 | Rieske domain containing protein, expressed              |
| maker-3-augustus-gene-475.14-mRNA-1 | NA | NA       | Os03g0806500 | OsR498G0307238900.01.T01 | Thioredoxin domain-containing protein                    |
| maker-3-augustus-gene-475.20-mRNA-1 | NA | NA       | Os03g0806900 | OsR498G0307241300.01.T01 | Cytochrome b-c1 complex subunit 7-2, mitochondrial       |
| maker-3-augustus-gene-475.23-mRNA-1 | NA | Indica   | Os07g0205500 | OsR498G0307242100.01.T01 | NEP-interacting protein 1                                |
| maker-3-augustus-gene-475.27-mRNA-1 | NA | NA       | 0            | OsR498G0307238800.01.T04 | EFP domain-containing protein                            |
| maker-3-augustus-gene-475.3-mRNA-1  | NA | Indica   | Os03g0805900 | OsR498G0307236300.01.T01 | Rieske domain containing protein, expressed              |
| maker-3-augustus-gene-475.35-mRNA-1 | NA | NA       | Os03g0807200 | OsR498G0307242400.01.T01 | Cysteine proteinases superfamily protein                 |
| maker-3-augustus-gene-475.38-mRNA-1 | NA | Japonica | Os03g0807400 | OsR498G0307318800.01.T02 | Calreticulin                                             |
| maker-3-augustus-gene-475.4-mRNA-1  | NA | Indica   | Os03g0805700 | OsR498G0307236300.01.T01 | PaO domain-containing protein                            |
| maker-3-augustus-gene-475.9-mRNA-1  | NA | Indica   | Os03g0805900 | OsR498G0307237100.01.T01 | PaO domain-containing protein                            |
| maker-3-augustus-gene-476.43-mRNA-1 | NA | NA       | Os03g0807700 | OsR498G0307244100.01.T01 | Putative Cation proton exchanger                         |
| maker-3-augustus-gene-476.45-mRNA-1 | NA | NA       | Os03g0807800 | OsR498G0307244300.01.T02 | Ribosomal protein S5                                     |
| maker-3-augustus-gene-476.47-mRNA-1 | NA | NA       | Os03g0807900 | OsR498G0307244500.01.T01 | chaperonin-like RbcX protein 2, chloroplastic            |
| maker-3-augustus-gene-476.50-mRNA-1 | NA | Japonica | Os03g0808000 | OsR498G0307245500.01.T01 | Polygalacturonase                                        |
| maker-3-augustus-gene-476.65-mRNA-1 | NA | NA       | Os03g0807600 | OsR498G0307243400.01.T01 | Methyltransferase                                        |
| maker-3-augustus-gene-476.68-mRNA-1 | NA | NA       | Os03g0808100 | OsR498G0307245800.01.T01 | Cellulose synthase                                       |
| maker-3-augustus-gene-476.73-mRNA-1 | NA | NA       | Os03g0808300 | OsR498G0307246200.01.T01 | Remorin like                                             |
| maker-3-augustus-gene-476.75-mRNA-1 | NA | NA       | 0            | OsR498G0307246800.01.T01 | Ubiquitin-60S ribosomal protein L40                      |
| maker-3-augustus-gene-482.53-mRNA-1 | NA | NA       |              |                          | RAB GTPase homolog 8A                                    |
| maker-3-augustus-gene-487.11-mRNA-1 | NA | NA       | Os03g0831900 | OsR498G0307317900.01.T01 | U1-type domain-containing protein (Fragment)             |
| maker-3-augustus-gene-487.33-mRNA-1 | NA | NA       | Os03g0831500 | OsR498G0307316600.01.T01 | AlR synthase                                             |
| maker-3-augustus-gene-487.36-mRNA-1 | NA | NA       |              |                          | GDLS esterase/lipase                                     |
| maker-3-augustus-gene-487.4-mRNA-1  | NA | Indica   | Os03g0831300 | OsR498G0307316100.01.T04 |                                                          |
| maker-3-augustus-gene-487.8-mRNA-1  | NA | NA       | Os03g0831700 | OsR498G0307317500.01.T02 | VARLMGL domain-containing protein                        |
| maker-3-augustus-gene-488.0-mRNA-1  | NA | NA       | Os03g0832400 | OsR498G0307319500.01.T01 | PPM-type phosphatase domain-containing protein           |
| maker-3-augustus-gene-488.12-mRNA-1 | NA | NA       | Os03g0832800 | OsR498G0307320700.01.T01 | PlsC domain-containing protein (Fragment)                |
| maker-3-augustus-gene-488.14-mRNA-1 | NA | NA       | Os03g0833100 | OsR498G0307321500.01.T01 | Short-chain dehydrogenase reductase 5                    |
| maker-3-augustus-gene-488.16-mRNA-1 | NA | Indica   | Os03g0833200 | OsR498G0307321700.01.T01 | TRM13 domain-containing protein                          |
| maker-3-augustus-gene-488.2-mRNA-1  | NA | NA       |              |                          | Nucleic acid-binding proteins superfamily                |
| maker-3-augustus-gene-488.20-mRNA-1 | NA | NA       | 0            | OsR498G0307323500.01.T02 | Glucan endo-1,3-beta-D-glucosidase                       |
| maker-3-augustus-gene-488.23-mRNA-1 | NA | NA       | Os03g0833800 | OsR498G0307324500.01.T02 | Polygalacturonase                                        |
| maker-3-augustus-gene-488.28-mRNA-1 | NA | NA       | Os03g0832200 | OsR498G0307318800.01.T01 | Calreticulin                                             |
| maker-3-augustus-gene-488.33-mRNA-1 | NA | NA       | Os03g0832300 | OsR498G0307319400.01.T01 | Huntingtin-interacting protein K                         |
| maker-3-augustus-gene-488.36-mRNA-1 | NA | Indica   | Os03g0832900 | OsR498G0307321200.01.T01 | DnaJ isogeny subfamily C member 14                       |

|                                      |    |          |            |              |                          |                                                           |
|--------------------------------------|----|----------|------------|--------------|--------------------------|-----------------------------------------------------------|
| maker-3-augustus-gene-488.41-mRNA-1  | NA | NA       |            | Os03g0833300 | OsR498G0307322000.01.T01 | Squamosa promoter-binding-like protein 6                  |
| maker-3-augustus-gene-488.47-mRNA-1  | NA | NA       |            | Os03g0833700 | OsR498G0307323800.01.T01 | RNA 3'-terminal phosphate cyclase                         |
| maker-3-augustus-gene-488.49-mRNA-1  | NA | NA       |            | Os03g0833900 | OsR498G0307324800.01.T02 | guanosine deaminase                                       |
| maker-3-augustus-gene-488.6-mRNA-1   | NA | NA       |            | Os03g0832600 | OsR498G0307320100.01.T01 | galactokinase-like                                        |
| maker-3-augustus-gene-489.41-mRNA-1  | NA | NA       |            | Os03g0834000 | OsR498G0307325300.01.T01 | Flap endonuclease 1-B                                     |
| maker-3-augustus-gene-489.45-mRNA-1  | NA | NA       |            | 0            | OsR498G0307325300.01.T07 | Phosphate metabolism protein                              |
| maker-3-augustus-gene-489.49-mRNA-1  | NA | Indica   |            | Os03g0835100 | OsR498G0307329500.01.T01 | Chloroplast protein import component                      |
| maker-3-augustus-gene-489.50-mRNA-1  | NA | NA       |            | Os03g0835400 | OsR498G0307330500.01.T01 | Electron transfer flavoprotein subunit alpha              |
| maker-3-augustus-gene-489.56-mRNA-1  | NA | NA       |            | Os03g0835800 | OsR498G0307331900.01.T06 | host cell factor                                          |
| maker-3-augustus-gene-489.63-mRNA-1  | NA | Japonica |            | Os03g0836100 | OsR498G0307333100.01.T01 | Absciscic acid 8'-hydroxylase                             |
| maker-3-augustus-gene-489.67-mRNA-1  | NA | Indica   |            | Os03g0295300 | OsR498G0307325600.01.T01 |                                                           |
| maker-3-augustus-gene-489.69-mRNA-1  | NA | NA       |            |              |                          | Transposon protein, putative, Mutator sub-class           |
| maker-3-augustus-gene-489.76-mRNA-1  | NA | NA       |            | Os03g0836200 | OsR498G0307333400.01.T07 | Glycine-rich RNA-binding protein RZ1A                     |
| maker-3-augustus-gene-492.16-mRNA-1  | NA | NA       |            | 0            | OsR498G0307352700.01.T05 | RNA-binding protein containing a PIN domain               |
| maker-3-augustus-gene-492.2-mRNA-1   | NA | NA       |            | 0            | OsR498G0307350100.01.T01 | Calcium-dependent protein kinase 6, putative              |
| maker-3-augustus-gene-492.4-mRNA-1   | NA | NA       |            |              |                          |                                                           |
| maker-3-augustus-gene-492.58-mRNA-1  | NA | NA       |            | Os03g0842900 | OsR498G0307352200.01.T01 | 11-beta-hydroxysteroid dehydrogenase-like 5 isoform A     |
| maker-3-augustus-gene-492.6-mRNA-1   | NA | NA       |            | 0            | OsR498G0307351900.01.T10 | Vacuolar sorting protein 9                                |
| maker-3-augustus-gene-492.60-mRNA-1  | NA | NA       |            | Os03g0843100 | OsR498G0307352600.01.T01 | Ras protein RIC2                                          |
| maker-3-augustus-gene-493.1-mRNA-1   | NA | NA       |            | Os03g0843600 | OsR498G0307353700.01.T04 | Ion channel CASTOR                                        |
| maker-3-augustus-gene-493.12-mRNA-1  | NA | NA       |            | Os03g0844000 | OsR498G0307354900.01.T06 | Pentatricopeptide repeat-containing protein chloroplastic |
| maker-3-augustus-gene-493.37-mRNA-1  | NA | Indica   |            | Os03g0843900 | OsR498G0307354600.01.T02 | Poly(ADP-ribose) glycohydrolase                           |
| maker-3-augustus-gene-494.24-mRNA-1  | NA | NA       |            | Os03g0846400 | OsR498G0307362100.01.T03 | Putative polyprotein from transposon TNT                  |
| maker-3-augustus-gene-494.37-mRNA-1  | NA | NA       |            | Os03g0845500 | OsR498G0307359200.01.T04 | Acyl-activating enzyme 16                                 |
| maker-3-augustus-gene-495.11-mRNA-1  | NA | NA       |            |              |                          | Transposon protein, putative, unclassified                |
| maker-3-augustus-gene-495.20-mRNA-1  | NA | Japonica | LRR-NBS-TM | Os03g0849100 | OsR498G0307368000.01.T01 | Powdery mildew resistance protein PM3 variant             |
| maker-3-augustus-gene-495.21-mRNA-1  | NA | NA       |            | Os03g0848700 | OsR498G0307368000.01.T01 | ADP-ribosyl cyclase/cyclic ADP-ribose hydrolase           |
| maker-3-augustus-gene-496.57-mRNA-1  | NA | NA       |            | Os03g0851000 | OsR498G0307374300.01.T03 | Nascent polypeptide-associated complex subunit beta       |
| maker-3-augustus-gene-496.73-mRNA-1  | NA | NA       |            | Os03g0850800 | OsR498G0307373800.01.T01 | Transferring glycosyl group transferase                   |
| maker-3-augustus-gene-496.75-mRNA-1  | NA | NA       |            | Os03g0851100 | OsR498G0307374600.01.T01 | Elongation factor Tu mitochondrial                        |
| maker-3-augustus-gene-497.38-mRNA-1  | NA | NA       |            | Os03g0851500 | OsR498G0307375500.01.T05 | DNA repair RAD52-like protein 2, chloroplastic            |
| maker-3-augustus-gene-498.31-mRNA-1  | NA | Indica   |            | Os03g0853500 | OsR498G0307381100.01.T01 | Brevis radix (BRX) domain                                 |
| maker-3-augustus-gene-498.34-mRNA-1  | NA | Indica   |            | Os03g0853800 | OsR498G0307382300.01.T01 | DNA-binding bromodomain-containing family protein         |
| maker-3-augustus-gene-498.41-mRNA-1  | NA | Indica   |            | Os03g0853600 | OsR498G0307381600.01.T02 | Ribonuclease P protein subunit P38-related                |
| maker-3-augustus-gene-498.44-mRNA-1  | NA | NA       |            | Os03g0853900 | OsR498G0307382600.01.T02 | Sinigrinase                                               |
| maker-3-augustus-gene-499.13-mRNA-1  | NA | NA       |            | 0            | OsR498G0307391700.01.T02 | ATP-dependent DNA helicase 2 subunit KU80                 |
| maker-3-augustus-gene-499.17-mRNA-1  | NA | NA       |            | Os03g0856400 | OsR498G0307392300.01.T02 | Sucrose nonfermenting 4                                   |
| maker-3-augustus-gene-499.23-mRNA-1  | NA | NA       |            | Os03g0856500 | OsR498G0307392900.01.T03 | Ribosome-binding factor like                              |
| maker-3-augustus-gene-499.25-mRNA-1  | NA | NA       |            | Os03g0856300 | OsR498G0307392200.01.T01 | Acyl carrier protein 2, chloroplastic                     |
| maker-3-augustus-gene-499.3-mRNA-1   | NA | NA       |            | Os01g0630700 | OsR498G0101590100.01.T01 | AT hook motif-containing protein, putative, expressed     |
| maker-3-augustus-gene-5.25-mRNA-1    | NA | NA       | Kinase-TM  | Os03g0114300 | OsR498G0305114700.01.T01 | Serine/threonine-protein kinase fray2                     |
| maker-3-augustus-gene-5.47-mRNA-1    | NA | NA       |            | Os03g0114200 | OsR498G0305114400.01.T01 | probable RNA-binding protein EIF1AD                       |
| maker-3-augustus-gene-502.101-mRNA-1 | NA | NA       |            | Os03g0861700 | OsR498G0307405800.01.T01 | Rhodanese-like domain-containing protein 8 chloroplastic  |
| maker-3-augustus-gene-502.107-mRNA-1 | NA | NA       |            | 0            | OsR498G0307406400.01.T01 | Nuclear transport factor 2 (NTF2) family protein          |
| maker-3-augustus-gene-502.70-mRNA-1  | NA | Indica   |            | Os03g0861800 | OsR498G0307405900.01.T01 | F-box domain containing protein, expressed                |
| maker-3-augustus-gene-502.78-mRNA-1  | NA | Indica   |            | Os03g0861800 | OsR498G0307405900.01.T01 | F-box domain containing protein, expressed                |
| maker-3-augustus-gene-502.83-mRNA-1  | NA | NA       |            | Os03g0861700 | OsR498G0307405800.01.T01 | Rhodanese-like domain-containing protein 8 chloroplastic  |
| maker-3-augustus-gene-502.89-mRNA-1  | NA | NA       |            | 0            | OsR498G0307406400.01.T01 | Nuclear transport factor 2 (NTF2) family protein          |
| maker-3-augustus-gene-502.94-mRNA-1  | NA | NA       |            | Os03g0797400 | OsR498G0307211000.01.T02 | Tryptophan synthase                                       |
| maker-3-augustus-gene-502.97-mRNA-1  | NA | NA       |            |              |                          | SANT domain-containing protein (Fragment)                 |
| maker-3-augustus-gene-54.36-mRNA-1   | NA | NA       |            | Os03g0206600 | OsR498G0305430300.01.T01 |                                                           |
| maker-3-augustus-gene-54.38-mRNA-1   | NA | NA       |            | Os03g0206900 | OsR498G0305430700.01.T01 | E3 ubiquitin-protein ligase RLIM                          |
| maker-3-augustus-gene-54.58-mRNA-1   | NA | Indica   |            | Os03g0206700 | OsR498G0305430600.01.T01 | BTB/POZ domain-containing protein At5g67385               |
| maker-3-augustus-gene-6.0-mRNA-1     | NA | NA       |            | Os03g0114800 | OsR498G0305116100.01.T01 | Major facilitator superfamily domain-containing protein 5 |
| maker-3-augustus-gene-6.11-mRNA-1    | NA | NA       |            | 0            | OsR498G0305119300.01.T04 | Pyridoxal 5'-phosphate synthase                           |
| maker-3-augustus-gene-6.15-mRNA-1    | NA | NA       |            | Os03g0115100 | OsR498G0305116800.01.T02 | Bifunctional fucokinasefucose pyrophosphorylase           |
| maker-3-augustus-gene-6.19-mRNA-1    | NA | NA       |            | Os03g0115200 | OsR498G0305117000.01.T01 | KH domain-containing protein (Fragment)                   |
| maker-3-augustus-gene-6.21-mRNA-1    | NA | Japonica |            | Os03g0115300 | OsR498G0305117000.01.T04 | Pentatricopeptide repeat-containing protein (Fragment)    |
| maker-3-augustus-gene-6.23-mRNA-1    | NA | NA       |            | Os03g0115700 | OsR498G0305119600.01.T01 | Putative very-long-chain 3-oxoacyl-CoA reductase          |
| maker-3-augustus-gene-6.24-mRNA-1    | NA | NA       |            | Os03g0115800 |                          |                                                           |
| maker-3-augustus-gene-6.4-mRNA-1     | NA | NA       |            | Os03g0115000 | OsR498G0305116500.01.T01 | Phytoecyanin domain-containing protein                    |

|                                    |    |          |           |              |                          |                                                                        |
|------------------------------------|----|----------|-----------|--------------|--------------------------|------------------------------------------------------------------------|
| maker-3-augustus-gene-64.27-mRNA-1 | NA | NA       |           | Os05g0471800 |                          | Far-red impaired response protein-like                                 |
| maker-3-augustus-gene-64.6-mRNA-1  | NA | NA       |           |              |                          |                                                                        |
| maker-3-augustus-gene-67.10-mRNA-1 | NA | NA       |           | Os03g0231600 | OsR498G0305514300.01.T01 | Branched-chain-amino-acid aminotransferase                             |
| maker-3-augustus-gene-67.14-mRNA-1 | NA | NA       |           | 0            | OsR498G0305506000.01.T01 | Maf family protein, putative, expressed                                |
| maker-3-augustus-gene-67.2-mRNA-1  | NA | NA       |           | Os03g0230500 | OsR498G0305508500.01.T01 | Inositol-tetrakisphosphate 1-kinase                                    |
| maker-3-augustus-gene-67.20-mRNA-1 | NA | NA       |           | Os03g0231700 | OsR498G0305514600.01.T05 | Squalene monooxygenase                                                 |
| maker-3-augustus-gene-67.8-mRNA-1  | NA | NA       |           | 0            | OsR498G0305512300.01.T05 | Homeobox-leucine zipper protein HAT3                                   |
| maker-3-augustus-gene-7.0-mRNA-1   | NA | Indica   |           | Os03g0116000 | OsR498G0305121100.01.T01 | Mitochondrial inner membrane protein OXA1                              |
| maker-3-augustus-gene-7.5-mRNA-1   | NA | Indica   |           | Os10g0521400 | OsR498G0305121500.01.T02 | Hydrolase, alpha/beta fold family protein, expressed                   |
| maker-3-augustus-gene-7.6-mRNA-1   | NA | Indica   |           | Os10g0521400 | OsR498G0305121500.01.T01 | AB hydrolase-1 domain-containing protein                               |
| maker-3-augustus-gene-80.0-mRNA-1  | NA | NA       |           | Os03g0255400 | OsR498G0305600500.01.T06 |                                                                        |
| maker-3-augustus-gene-80.11-mRNA-1 | NA | NA       |           | Os03g0254800 | OsR498G0305598600.01.T01 | Chorismate synthase                                                    |
| maker-3-augustus-gene-80.15-mRNA-1 | NA | Indica   |           | Os03g0254900 | OsR498G0305598800.01.T01 | probable E3 ubiquitin-protein ligase LOG2                              |
| maker-3-augustus-gene-80.17-mRNA-1 | NA | NA       |           | Os03g0255100 | OsR498G0305600000.01.T02 | Beta-galactosidase                                                     |
| maker-3-augustus-gene-80.25-mRNA-1 | NA | NA       |           | Os03g0255200 | OsR498G0305600400.01.T01 | Protein CHAPERONE-LIKE PROTEIN OF POR1, chloroplastic-like             |
| maker-3-augustus-gene-80.32-mRNA-1 | NA | Indica   |           | Os03g0255900 | OsR498G0305602400.01.T01 | PGG domain-containing protein (Fragment)                               |
| maker-3-augustus-gene-80.4-mRNA-1  | NA | NA       |           | Os03g0254700 | OsR498G0305598000.01.T01 | TOPLESS                                                                |
| maker-3-augustus-gene-81.12-mRNA-1 | NA | NA       |           | Os03g0257000 | OsR498G0305604800.01.T01 | Rho GTPase-activating protein REN1-like                                |
| maker-3-augustus-gene-81.19-mRNA-1 | NA | NA       | Kinase-TM | 0            | OsR498G0305607600.01.T01 | Putative receptor-type protein kinase LRK1                             |
| maker-3-augustus-gene-81.2-mRNA-1  | NA | Indica   |           | Os03g0256800 | OsR498G0305604600.01.T02 | Rho GTPase activation protein (RhoGAP) with PH domain                  |
| maker-3-augustus-gene-82.0-mRNA-1  | NA | Japonica |           | Os03g0258500 | OsR498G0305609300.01.T01 | Beclin 1 protein (Fragment)                                            |
| maker-3-augustus-gene-82.1-mRNA-1  | NA | NA       |           | Os03g0259100 | OsR498G0305611500.01.T01 | Phytocyanin domain-containing protein                                  |
| maker-3-augustus-gene-82.17-mRNA-1 | NA | Japonica |           | Os03g0259400 | OsR498G0305612000.01.T01 | Leucoanthocyanidin reductase                                           |
| maker-3-augustus-gene-82.20-mRNA-1 | NA | Indica   |           | Os03g0259700 | OsR498G0305612600.01.T01 | UDENN domain-containing protein (Fragment)                             |
| maker-3-augustus-gene-82.24-mRNA-1 | NA | NA       |           | Os03g0260100 | OsR498G0305614000.01.T02 | Metallophos domain-containing protein (Fragment)                       |
| maker-3-augustus-gene-82.3-mRNA-1  | NA | NA       |           | Os03g0259300 | OsR498G0305611700.01.T03 | ERAD-associated E3 ubiquitin-protein ligase component HRD3A like       |
| maker-3-augustus-gene-82.5-mRNA-1  | NA | NA       |           | Os03g0259900 | OsR498G0305613300.01.T01 | GTD-binding domain-containing protein (Fragment)                       |
| maker-3-augustus-gene-88.69-mRNA-1 | NA | NA       |           | 0            | OsR498G1120154400.01.T01 |                                                                        |
| maker-3-augustus-gene-91.0-mRNA-1  | NA | NA       |           | Os03g0275900 | OsR498G0305674500.01.T01 | RING-type E3 ubiquitin transferase                                     |
| maker-3-augustus-gene-91.12-mRNA-1 | NA | NA       |           | Os03g0276800 | OsR498G0305679400.01.T01 | probable mediator of RNA polymerase II transcription subunit 37c       |
| maker-3-augustus-gene-91.14-mRNA-1 | NA | Indica   |           | Os03g0276900 | OsR498G0305679600.01.T01 | Beta-glucuronosyltransferase                                           |
| maker-3-augustus-gene-91.18-mRNA-1 | NA | NA       |           | Os03g0277000 | OsR498G0305680000.01.T01 | Guanosine nucleotide diphosphate dissociation inhibitor                |
| maker-3-augustus-gene-91.20-mRNA-1 | NA | Indica   |           | Os03g0276500 | OsR498G0305681400.01.T01 | probable mediator of RNA polymerase II transcription subunit 37c       |
| maker-3-augustus-gene-91.22-mRNA-1 | NA | NA       |           | Os03g0277500 | OsR498G0305682000.01.T01 | Dessication-induced 1VOC superfamily protein                           |
| maker-3-augustus-gene-91.3-mRNA-1  | NA | NA       |           | Os03g0276500 | OsR498G0305678500.01.T01 | Non-cell-autonomous heat shock cognate protein 70                      |
| maker-3-augustus-gene-91.6-mRNA-1  | NA | NA       |           | 0            | OsR498G0305677200.01.T01 | Zinc finger transcription factor                                       |
| maker-3-augustus-gene-91.8-mRNA-1  | NA | NA       |           | Os03g0276600 | OsR498G0305679000.01.T01 | Putative FMN-binding split barrel                                      |
| maker-3-augustus-gene-92.39-mRNA-1 | NA | NA       |           | Os03g0278000 | OsR498G0305683700.01.T01 | UDP-D-glucuronate decarboxylase                                        |
| maker-3-augustus-gene-92.44-mRNA-1 | NA | NA       |           | Os03g0278200 | OsR498G0305684300.01.T01 | Trifunctional UDP-glucose 4,6-dehydratase                              |
| maker-3-augustus-gene-92.46-mRNA-1 | NA | NA       |           | Os03g0278500 | OsR498G0305685300.01.T02 | Polyadenylate-binding protein 7                                        |
| maker-3-augustus-gene-92.50-mRNA-1 | NA | NA       |           |              |                          | Acyl-CoA N-acyltransferase with RING/FYVE/PHD-type zinc finger domain  |
| maker-3-augustus-gene-92.55-mRNA-1 | NA | NA       |           | Os03g0277600 | OsR498G0305682600.01.T01 | Cysteine-rich repeat secretory protein 55                              |
| maker-3-augustus-gene-92.57-mRNA-1 | NA | NA       |           | Os03g0277700 | OsR498G0305682800.01.T01 | Cysteine-rich repeat secretory protein 55                              |
| maker-3-augustus-gene-92.59-mRNA-1 | NA | Indica   |           | Os03g0278300 | OsR498G0305684800.01.T05 | THO complex subunit 4                                                  |
| maker-3-augustus-gene-92.63-mRNA-1 | NA | NA       |           | Os03g0278400 | OsR498G0305685200.01.T02 | ADP-ribosylation factor GTPase-activating protein AGD6                 |
| maker-3-augustus-gene-92.66-mRNA-1 | NA | NA       |           | Os03g0278800 | OsR498G0305687200.01.T01 | Glycine-rich RNA-binding protein 6 mitochondrial                       |
| maker-3-augustus-gene-92.69-mRNA-1 | NA | NA       |           | Os03g0279200 | OsR498G0305688000.01.T01 |                                                                        |
| maker-3-augustus-gene-92.71-mRNA-1 | NA | NA       |           | Os03g0279400 | OsR498G0305689200.01.T01 | Arginine biosynthesis bifunctional protein ArgI, chloroplastic         |
| maker-3-augustus-gene-93.26-mRNA-1 | NA | NA       |           |              |                          | Kinesin-like protein KIN-5B                                            |
| maker-3-augustus-gene-93.29-mRNA-1 | NA | NA       |           | Os03g0279900 | OsR498G0305693100.01.T01 | Phosphoinositide binding                                               |
| maker-3-augustus-gene-93.31-mRNA-1 | NA | NA       |           | Os03g0279950 | OsR498G0305693300.01.T06 | Photosynthetic NDH subunit of lumenal location 1 chloroplastic         |
| maker-3-augustus-gene-93.36-mRNA-1 | NA | NA       |           | Os03g0280400 | OsR498G0305694300.01.T01 | Plant-specific domain TIGR01589 family protein                         |
| maker-3-augustus-gene-93.39-mRNA-1 | NA | Indica   |           | Os03g0280700 | OsR498G0305695500.01.T01 | Phosphatidylinositol N-acetylglucosaminyltransferase subunit P-related |
| maker-3-augustus-gene-93.43-mRNA-1 | NA | NA       |           | Os03g0281000 | OsR498G0305696300.01.T01 | Ankyrin repeat                                                         |
| maker-3-augustus-gene-93.46-mRNA-1 | NA | NA       |           | Os03g0281100 | OsR498G0305696900.01.T01 | Ankyrin repeat-containing protein isoform A                            |
| maker-3-augustus-gene-93.48-mRNA-1 | NA | NA       |           | Os03g0279500 |                          | BHLH domain-containing protein                                         |
| maker-3-augustus-gene-93.52-mRNA-1 | NA | NA       |           | Os03g0280000 | OsR498G0305693600.01.T04 | ABC transporter                                                        |
| maker-3-augustus-gene-93.55-mRNA-1 | NA | Indica   |           | Os03g0280800 | OsR498G0305696000.01.T03 | UDP-glucuronic acid decarboxylase                                      |
| maker-3-augustus-gene-94.0-mRNA-1  | NA | NA       |           | Os03g0282900 | OsR498G0305706500.01.T01 | Stress-associated protein                                              |
| maker-3-augustus-gene-94.10-mRNA-1 | NA | NA       |           |              |                          | Cnd3 domain-containing protein                                         |
| maker-3-augustus-gene-94.20-mRNA-1 | NA | NA       |           | Os03g0282800 | OsR498G0305706400.01.T01 | Platelet endothelial aggregation receptor 1 (Fragment)                 |

|                                     |    |          |           |              |                          |                                                                             |
|-------------------------------------|----|----------|-----------|--------------|--------------------------|-----------------------------------------------------------------------------|
| maker-3-augustus-gene-94.23-mRNA-1  | NA | NA       |           | Os03g0283000 | OsR498G0305706800.01.T01 | GST N-terminal domain-containing protein                                    |
| maker-3-augustus-gene-94.26-mRNA-1  | NA | Indica   |           | Os03g0283100 | OsR498G0305707200.01.T01 | Glutathione S-transferase                                                   |
| maker-3-augustus-gene-94.32-mRNA-1  | NA | NA       |           | Os03g0283200 | OsR498G0305707600.01.T01 | Safener induced1                                                            |
| maker-3-augustus-gene-94.4-mRNA-1   | NA | NA       |           | Os03g0281300 | OsR498G0305698200.01.T01 | GRIP and coiled-coil domain-containing protein C2D7D.02c-like               |
| maker-3-augustus-gene-94.6-mRNA-1   | NA | Indica   |           | Os03g0281600 | OsR498G0305699400.01.T03 | Endoplasmic reticulum-type calcium-transporting ATPase 4                    |
| maker-3-augustus-gene-95.34-mRNA-1  | NA | NA       |           | Os03g0283300 | OsR498G0305707900.01.T01 | TerC integral membrane domain-containing protein isoform 1                  |
| maker-3-augustus-gene-95.38-mRNA-1  | NA | NA       |           | 0            | OsR498G0305709100.01.T02 | Ypt/Rab-GAP domain of gyp1p superfamily protein                             |
| maker-3-augustus-gene-95.47-mRNA-1  | NA | NA       |           | Os03g0284600 | OsR498G0305711700.01.T01 | Thioredoxin-like protein AAED1, chloroplastic                               |
| maker-3-augustus-gene-95.51-mRNA-1  | NA | NA       |           | Os03g0283400 |                          | Cyclin F-box                                                                |
| maker-3-augustus-gene-95.53-mRNA-1  | NA | NA       |           | Os03g0283600 | OsR498G0305708400.01.T01 | CDP-diacylglycerol-glycerol-3-phosphate 3-phosphatidyltransferase 2-like is |
| maker-3-augustus-gene-95.56-mRNA-1  | NA | NA       | Kinase-TM | Os03g0283900 | OsR498G0305709600.01.T01 | Serine/threonine-protein kinase RLCKVII                                     |
| maker-3-augustus-gene-95.62-mRNA-1  | NA | NA       |           | Os03g0284100 | OsR498G0305710000.01.T07 | Two-component response regulator-like PRR73                                 |
| maker-3-augustus-gene-95.64-mRNA-1  | NA | NA       |           | Os03g0284500 | OsR498G0305711600.01.T01 | HAD-superfamily subfamily IIA hydrolase, TIGR01456, CECR5 containing prot   |
| maker-4-augustus-gene-0.0-mRNA-1    | NA | NA       |           | Os04g0169100 | OsR498G0407621300.01.T01 | Ethylene receptor                                                           |
| maker-4-augustus-gene-10.8-mRNA-1   | NA | NA       |           | Os04g0185500 | OsR498G0407663700.01.T03 | E3 ubiquitin-protein ligase MBR2                                            |
| maker-4-augustus-gene-100.0-mRNA-1  | NA | Japonica |           | Os04g0334700 | OsR498G0408168600.01.T04 | Peptidase A1 domain-containing protein                                      |
| maker-4-augustus-gene-100.1-mRNA-1  | NA | NA       |           | 0            | OsR498G0408147000.01.T02 | Peptidase A1 domain-containing protein                                      |
| maker-4-augustus-gene-102.17-mRNA-1 | NA | NA       |           | Os04g0334700 |                          | Peptidase A1 domain-containing protein                                      |
| maker-4-augustus-gene-103.48-mRNA-1 | NA | Indica   |           | Os04g0337000 | OsR498G0408168600.01.T03 | Aspartic proteinase-like protein 2                                          |
| maker-4-augustus-gene-104.11-mRNA-1 | NA | Indica   |           | Os04g0340300 | OsR498G0408176200.01.T01 | (+)-delta-cadinene synthase isozyme XC14                                    |
| maker-4-augustus-gene-104.4-mRNA-1  | NA | NA       |           | 0            | OsR498G0408173900.01.T01 |                                                                             |
| maker-4-augustus-gene-104.7-mRNA-1  | NA | NA       |           | Os04g0339000 | OsR498G0408175300.01.T01 | Ent-cassadiene C2-hydroxylase                                               |
| maker-4-augustus-gene-104.9-mRNA-1  | NA | NA       |           | Os04g0339400 | OsR498G0408175900.01.T01 | Probable aldo-keto reductase 3                                              |
| maker-4-augustus-gene-105.0-mRNA-1  | NA | NA       |           | 0            | OsR498G0408182300.01.T09 | HGWP repeat containing protein-like                                         |
| maker-4-augustus-gene-105.8-mRNA-1  | NA | NA       |           | 0            | OsR498G0408177410.01.T01 | Protein kinase domain-containing protein                                    |
| maker-4-augustus-gene-105.9-mRNA-1  | NA | NA       |           | Os04g0340300 | OsR498G0408179000.01.T02 | (+)-delta-cadinene synthase isozyme A                                       |
| maker-4-augustus-gene-106.0-mRNA-1  | NA | NA       |           | Os04g0340300 | OsR498G0408186000.01.T01 |                                                                             |
| maker-4-augustus-gene-106.5-mRNA-1  | NA | Indica   |           | Os04g0341800 | OsR498G0408187800.01.T01 | (+)-delta-cadinene synthase isozyme C2                                      |
| maker-4-augustus-gene-107.0-mRNA-1  | NA | NA       |           |              |                          | (+)-delta-cadinene synthase isozyme C2                                      |
| maker-4-augustus-gene-108.29-mRNA-1 | NA | NA       |           |              |                          | Transposon protein, putative, CACTA, En/Spm sub-class                       |
| maker-4-augustus-gene-108.34-mRNA-1 | NA | Indica   |           | Os04g0345400 | OsR498G0408206800.01.T01 | SWIM-type domain-containing protein                                         |
| maker-4-augustus-gene-109.1-mRNA-1  | NA | NA       |           | 0            | OsR498G0408213100.01.T02 | 1,2-dihydroxy-3-keto-5-methylthiopentene dioxygenase                        |
| maker-4-augustus-gene-109.11-mRNA-1 | NA | Indica   |           | Os04g0345400 | OsR498G0408210400.01.T01 | Terpene synthase                                                            |
| maker-4-augustus-gene-110.32-mRNA-1 | NA | Indica   |           | Os04g0346800 | OsR498G0408216300.01.T02 | dCTP pyrophosphatase 1                                                      |
| maker-4-augustus-gene-110.44-mRNA-1 | NA | NA       |           | 0            | OsR498G0408220300.01.T01 |                                                                             |
| maker-4-augustus-gene-110.50-mRNA-1 | NA | NA       |           | Os04g0347900 | OsR498G0408220900.01.T01 | SANTA domain-containing protein                                             |
| maker-4-augustus-gene-110.54-mRNA-1 | NA | NA       |           | Os04g0348000 | OsR498G0408221300.01.T05 | SANTA domain-containing protein                                             |
| maker-4-augustus-gene-110.59-mRNA-1 | NA | NA       |           | 0            | OsR498G0408217400.01.T01 | Prolyl 4-hydroxylase 1                                                      |
| maker-4-augustus-gene-111.0-mRNA-1  | NA | Indica   |           | Os04g0348300 | OsR498G0408222300.01.T01 | Cell division cycle 5-related protein                                       |
| maker-4-augustus-gene-111.12-mRNA-1 | NA | NA       |           | Os04g0348100 | OsR498G0408221600.01.T01 | P-loop containing nucleoside triphosphate hydrolase, Protein Cms1           |
| maker-4-augustus-gene-112.40-mRNA-1 | NA | Indica   |           | Os02g0791200 | OsR498G0408232100.01.T01 | Probable E3 ubiquitin-protein ligase XBOS32                                 |
| maker-4-augustus-gene-113.40-mRNA-1 | NA | NA       |           | 0            | OsR498G0408239000.01.T03 | Phospholipid-transporting ATPase                                            |
| maker-4-augustus-gene-113.51-mRNA-1 | NA | NA       |           | 0            | OsR498G0408240000.01.T03 | ATP-dependent DNA helicase                                                  |
| maker-4-augustus-gene-114.32-mRNA-1 | NA | Indica   |           | Os04g0354600 | OsR498G0408241100.01.T02 | Fatty acyl-CoA reductase                                                    |
| maker-4-augustus-gene-114.40-mRNA-1 | NA | NA       |           |              |                          | Fatty acyl-CoA reductase                                                    |
| maker-4-augustus-gene-114.41-mRNA-1 | NA | NA       |           | Os04g0354200 |                          | Transposon protein, putative, unclassified                                  |
| maker-4-augustus-gene-114.50-mRNA-1 | NA | Japonica |           | Os04g0354600 | OsR498G0408245500.01.T02 | Fatty acyl-CoA reductase                                                    |
| maker-4-augustus-gene-114.58-mRNA-1 | NA | NA       |           | Os11g0307600 | OsR498G1119899800.01.T01 | Protein kinase domain-containing protein                                    |
| maker-4-augustus-gene-116.35-mRNA-1 | NA | NA       |           | 0            | OsR498G0408256700.01.T05 | RNA-binding protein Musashi 2                                               |
| maker-4-augustus-gene-116.37-mRNA-1 | NA | NA       |           |              |                          | Quinone-oxidoreductase, chloroplastic                                       |
| maker-4-augustus-gene-117.32-mRNA-1 | NA | NA       |           | Os04g0359700 | OsR498G0408268900.01.T01 | Chloroplast envelope quinone oxidoreductase                                 |
| maker-4-augustus-gene-118.35-mRNA-1 | NA | Indica   |           | Os08g0114300 | OsR498G0408279200.01.T02 | L-gulonolactone oxidase                                                     |
| maker-4-augustus-gene-119.22-mRNA-1 | NA | NA       |           | 0            | OsR498G0408293500.01.T01 | ATP-dependent DNA helicase                                                  |
| maker-4-augustus-gene-121.7-mRNA-1  | NA | NA       |           | Os08g0487300 | OsR498G0816350400.01.T01 | Transposon protein, putative, Mutator sub-class                             |
| maker-4-augustus-gene-122.30-mRNA-1 | NA | NA       |           | 0            | OsR498G0102386100.01.T01 |                                                                             |
| maker-4-augustus-gene-122.31-mRNA-1 | NA | NA       | Kinase-TM | Os04g0366000 | OsR498G0408325600.01.T01 | Wall-associated receptor kinase 1                                           |
| maker-4-augustus-gene-124.29-mRNA-1 | NA | NA       |           | 0            | OsR498G0408333700.01.T01 |                                                                             |
| maker-4-augustus-gene-124.35-mRNA-1 | NA | NA       | Kinase-TM | Os04g0368000 | OsR498G0408337400.01.T01 | Wall-associated receptor kinase 2                                           |
| maker-4-augustus-gene-126.0-mRNA-1  | NA | NA       | Kinase-TM |              |                          | Protein kinase domain-containing protein (Fragment)                         |
| maker-4-augustus-gene-127.31-mRNA-1 | NA | NA       |           |              |                          |                                                                             |
| maker-4-augustus-gene-128.0-mRNA-1  | NA | Indica   |           | Os09g0502500 | OsR498G0408358300.01.T01 | Chloroplastic quinone-oxidoreductase                                        |

|                                     |    |          |        |              |                          |                                                                               |
|-------------------------------------|----|----------|--------|--------------|--------------------------|-------------------------------------------------------------------------------|
| maker-4-augustus-gene-128.12-mRNA-1 | NA | NA       |        | 0            | OsR498G0408361000.01.T01 | RING-type E3 ubiquitin transferase                                            |
| maker-4-augustus-gene-128.8-mRNA-1  | NA | NA       |        | Os04g0372800 | OsR498G0408358600.01.T01 | RNA-binding protein-like                                                      |
| maker-4-augustus-gene-129.0-mRNA-1  | NA | Indica   |        | Os04g0373400 | OsR498G0408361700.01.T01 | Protein DETOXIFICATION                                                        |
| maker-4-augustus-gene-129.11-mRNA-1 | NA | Indica   | NBS-TM | Os04g0374175 | OsR498G0408364900.01.T02 | NB-ARC domain-containing protein                                              |
| maker-4-augustus-gene-129.15-mRNA-1 | NA | NA       |        | Os04g0375900 | OsR498G0408372800.01.T01 | Kinesin-like protein KIN-10B                                                  |
| maker-4-augustus-gene-129.22-mRNA-1 | NA | NA       |        | Os04g0376000 | OsR498G0408373000.01.T01 | 60S ribosomal protein L35                                                     |
| maker-4-augustus-gene-129.25-mRNA-1 | NA | NA       |        | Os04g0376100 | OsR498G0408373400.01.T01 | Mitochondrial inner membrane translocase subunit Tim17/Tim22/Tim23/pe         |
| maker-4-augustus-gene-129.27-mRNA-1 | NA | Indica   |        | Os04g0376300 | OsR498G0408374600.01.T02 | 3-oxoacyl-[acyl-carrier-protein] reductase                                    |
| maker-4-augustus-gene-129.3-mRNA-1  | NA | NA       |        | 0            | OsR498G0205060200.01.T01 |                                                                               |
| maker-4-augustus-gene-129.32-mRNA-1 | NA | NA       |        | Os04g0376400 | OsR498G0408375400.01.T01 | Chitotriosidase-1                                                             |
| maker-4-augustus-gene-129.7-mRNA-1  | NA | NA       |        | 0            | OsR498G0100556000.01.T04 | Putative transcription factor DP, helitron helicase-like domain-containing pr |
| maker-4-augustus-gene-130.0-mRNA-1  | NA | NA       |        | 0            | OsR498G0408379700.01.T01 | Ulp1 protease family, C-terminal catalytic domain containing protein, expres  |
| maker-4-augustus-gene-130.13-mRNA-1 | NA | NA       |        | Os04g0376500 | OsR498G0408376600.01.T01 | Eukaryotic translation initiation factor 3 subunit H                          |
| maker-4-augustus-gene-130.20-mRNA-1 | NA | Indica   |        | Os09g0401900 | OsR498G0408376800.01.T03 | ER lumen protein-retaining receptor                                           |
| maker-4-augustus-gene-130.29-mRNA-1 | NA | NA       |        | Os04g0376700 | OsR498G0408377200.01.T01 | ER lumen protein-retaining receptor like                                      |
| maker-4-augustus-gene-130.31-mRNA-1 | NA | NA       |        | Os03g0598600 |                          |                                                                               |
| maker-4-augustus-gene-130.33-mRNA-1 | NA | Indica   |        | Os03g0857200 | OsR498G0408382200.01.T03 |                                                                               |
| maker-4-augustus-gene-130.4-mRNA-1  | NA | Indica   |        | Os04g0377600 | OsR498G0408380900.01.T01 | Rab-GAP TBC domain-containing protein (Fragment)                              |
| maker-4-augustus-gene-130.9-mRNA-1  | NA | NA       |        | Os04g0378200 | OsR498G0408381500.01.T01 | Ankyrin repeat and SAM domain-containing protein 6                            |
| maker-4-augustus-gene-131.0-mRNA-1  | NA | NA       |        | Os04g0379300 | OsR498G0408384700.01.T01 | Methyltransferase-like protein 13                                             |
| maker-4-augustus-gene-131.11-mRNA-1 | NA | NA       |        | Os04g0380200 | OsR498G0408388100.01.T01 | Acyl-[acyl-carrier-protein]--UDP-N-acetylglucosamine O-acyltransferase        |
| maker-4-augustus-gene-131.14-mRNA-1 | NA | NA       |        | Os04g0379400 | OsR498G0408385000.01.T05 | Putative sodium/metabolite cotransporter BASS6, chloroplastic isoform X1      |
| maker-4-augustus-gene-131.18-mRNA-1 | NA | NA       |        | Os04g0379700 | OsR498G0408386400.01.T02 | VDE domain-containing protein (Fragment)                                      |
| maker-4-augustus-gene-131.22-mRNA-1 | NA | NA       |        | Os04g0379900 | OsR498G0408386800.01.T01 | Stearoyl-acyl-carrier protein desaturase                                      |
| maker-4-augustus-gene-131.26-mRNA-1 | NA | NA       |        | 0            | OsR498G0408387600.01.T06 |                                                                               |
| maker-4-augustus-gene-131.31-mRNA-1 | NA | NA       |        | Os04g0380300 | OsR498G0408388600.01.T06 | Acyl-[acyl-carrier-protein] desaturase                                        |
| maker-4-augustus-gene-131.8-mRNA-1  | NA | NA       |        | Os04g0379800 | OsR498G0408386500.01.T01 |                                                                               |
| maker-4-augustus-gene-132.11-mRNA-1 | NA | NA       |        | Os04g0381600 | OsR498G0408397700.01.T02 | Putative nucleoside-triphosphate phosphatase                                  |
| maker-4-augustus-gene-132.14-mRNA-1 | NA | NA       |        | Os04g0381000 | OsR498G0408395400.01.T05 | Dynamin-related protein 3A isoform 2                                          |
| maker-4-augustus-gene-132.2-mRNA-1  | NA | NA       |        | Os04g0381100 | OsR498G0408396100.01.T06 | Sodium-bile acid cotransporter                                                |
| maker-4-augustus-gene-132.8-mRNA-1  | NA | NA       |        |              |                          | AB hydrolase-1 domain-containing protein (Fragment)                           |
| maker-4-augustus-gene-133.27-mRNA-1 | NA | NA       |        | 0            | OsR498G0408399500.01.T01 | Transcription factor FER-LIKE IRON DEFICIENCY-INDUCED TRANSCRIPTION FA        |
| maker-4-augustus-gene-133.29-mRNA-1 | NA | Indica   |        | Os04g0382100 | OsR498G0408400500.01.T01 | SWI/SNF complex component SNF12 like                                          |
| maker-4-augustus-gene-133.31-mRNA-1 | NA | NA       |        | Os04g0382700 | OsR498G0408403100.01.T01 | Vacuolar protein sorting-associated protein 11 isogeny                        |
| maker-4-augustus-gene-133.35-mRNA-1 | NA | NA       |        | Os04g0382300 | OsR498G0408401400.01.T01 | AMP-activated protein kinase, gamma regulatory subunit                        |
| maker-4-augustus-gene-134.45-mRNA-1 | NA | NA       |        | Os04g0385600 | OsR498G0408412400.01.T01 | MYND-type domain-containing protein                                           |
| maker-4-augustus-gene-135.28-mRNA-1 | NA | Indica   |        | Os04g0386500 | OsR498G0408420100.01.T03 | Fibrous sheath-interacting protein                                            |
| maker-4-augustus-gene-135.31-mRNA-1 | NA | NA       |        | Os04g0386600 | OsR498G0408420400.01.T01 | 2,3-dimethylmalate lyase-like                                                 |
| maker-4-augustus-gene-135.36-mRNA-1 | NA | Indica   |        | Os04g0386900 | OsR498G0408421400.01.T01 | B3 DNA binding domain containing protein                                      |
| maker-4-augustus-gene-136.0-mRNA-1  | NA | Japonica |        | Os04g0387300 | OsR498G0408424910.01.T01 | MADS-box domain-containing protein                                            |
| maker-4-augustus-gene-136.2-mRNA-1  | NA | Indica   |        | Os04g0387500 | OsR498G0408424910.01.T01 | MADS-box domain-containing protein                                            |
| maker-4-augustus-gene-137.34-mRNA-1 | NA | Indica   |        | Os08g0532400 | OsR498G0408429300.01.T01 | Nodulin-like domain-containing protein                                        |
| maker-4-augustus-gene-137.37-mRNA-1 | NA | Indica   |        | Os07g0484700 | OsR498G0408431700.01.T02 | Actin-related protein 4                                                       |
| maker-4-augustus-gene-137.45-mRNA-1 | NA | NA       |        | Os04g0390000 | OsR498G0408432700.01.T01 | 2-oxoglutarate dehydrogenase, mitochondrial-like                              |
| maker-4-augustus-gene-137.51-mRNA-1 | NA | Indica   |        | Os02g0510600 | OsR498G0408433300.01.T01 | Farnesylated protein 3                                                        |
| maker-4-augustus-gene-137.56-mRNA-1 | NA | Indica   |        | Os04g0388601 | OsR498G0408428400.01.T02 | Mediator of RNA polymerase II transcription subunit like                      |
| maker-4-augustus-gene-137.58-mRNA-1 | NA | Japonica |        | Os04g0388900 | OsR498G0203903200.01.T01 | Sm domain-containing protein                                                  |
| maker-4-augustus-gene-138.18-mRNA-1 | NA | NA       |        | Os04g0391500 | OsR498G0408441700.01.T02 | ACT domain-containing protein ACR6                                            |
| maker-4-augustus-gene-139.53-mRNA-1 | NA | NA       |        | Os04g0394300 | OsR498G0408449400.01.T01 | Zinc finger CCCH domain-containing protein 27                                 |
| maker-4-augustus-gene-14.36-mRNA-1  | NA | NA       |        | 0            | OsR498G0816107200.01.T03 |                                                                               |
| maker-4-augustus-gene-14.38-mRNA-1  | NA | NA       |        | 0            | OsR498G0815948900.01.T01 | Transposon protein, putative, CACTA, En/Spm sub-class                         |
| maker-4-augustus-gene-140.11-mRNA-1 | NA | NA       |        | Os04g0394500 | OsR498G0408450800.01.T01 | DNA-directed RNA polymerase III subunit RPC4                                  |
| maker-4-augustus-gene-140.18-mRNA-1 | NA | NA       |        | Os04g0394500 | OsR498G0407856000.01.T01 | DNA-directed RNA polymerase III subunit RPC4                                  |
| maker-4-augustus-gene-140.4-mRNA-1  | NA | NA       |        | Os04g0394500 | OsR498G0407856000.01.T01 | DNA-directed RNA polymerase III subunit RPC4                                  |
| maker-4-augustus-gene-145.0-mRNA-1  | NA | NA       |        | Os04g0401700 | OsR498G0408481900.01.T05 | Potassium transporter                                                         |
| maker-4-augustus-gene-145.14-mRNA-1 | NA | Indica   |        | Os02g0523500 | OsR498G0408484600.01.T01 | TUDOR-SN protein 1                                                            |
| maker-4-augustus-gene-145.4-mRNA-1  | NA | NA       |        | 0            | OsR498G0408485100.01.T04 | OTU domain-containing protein isoform A                                       |
| maker-4-augustus-gene-146.28-mRNA-1 | NA | NA       |        | Os04g0403200 | OsR498G0408492100.01.T01 | Inhibitor of apoptosis-like protein                                           |
| maker-4-augustus-gene-146.30-mRNA-1 | NA | NA       |        | Os04g0403300 | OsR498G0408493900.01.T01 | Alpha-amylase                                                                 |
| maker-4-augustus-gene-146.31-mRNA-1 | NA | NA       |        | Os04g0403400 | OsR498G0408494100.01.T01 | HIRAN domain-containing protein (Fragment)                                    |
| maker-4-augustus-gene-146.54-mRNA-1 | NA | NA       |        | Os04g0403500 | OsR498G0408494500.01.T01 | NADP-binding Rossmann-fold superfamily protein isoform 1                      |



|                                     |    |          |        |              |                          |                                                                            |
|-------------------------------------|----|----------|--------|--------------|--------------------------|----------------------------------------------------------------------------|
| maker-4-augustus-gene-146.57-mRNA-1 | NA | Indica   |        | Os04g0403701 | OsR498G0408494800.01.T07 | PPM-type phosphatase domain-containing protein (Fragment)                  |
| maker-4-augustus-gene-146.60-mRNA-1 | NA | Indica   |        | Os04g0403901 | OsR498G0408497600.01.T01 | COPII coat assembly protein SEC16-like                                     |
| maker-4-augustus-gene-146.62-mRNA-1 | NA | NA       |        | Os04g0404400 | OsR498G0408499600.01.T02 | Desiccation-related protein PCC13-62                                       |
| maker-4-augustus-gene-147.0-mRNA-1  | NA | Indica   |        | Os02g0525900 | OsR498G0408501100.01.T02 | Acetyl-coenzyme A synthetase                                               |
| maker-4-augustus-gene-147.13-mRNA-1 | NA | NA       |        | Os04g0405700 |                          |                                                                            |
| maker-4-augustus-gene-147.16-mRNA-1 | NA | Indica   |        | Os04g0405800 | OsR498G0408506500.01.T02 | Uridine monophosphate kinase                                               |
| maker-4-augustus-gene-147.21-mRNA-1 | NA | NA       |        | Os04g0404900 | OsR498G0408501400.01.T01 | Heparan-alpha-glucosaminide N-acetyltransferase-like isoform X2            |
| maker-4-augustus-gene-147.25-mRNA-1 | NA | Japonica |        | Os04g0405100 | OsR498G0408502400.01.T02 | SAM domain-containing protein                                              |
| maker-4-augustus-gene-147.30-mRNA-1 | NA | NA       |        | Os04g0405300 | OsR498G0408503600.01.T01 | Momilactone synthase like                                                  |
| maker-4-augustus-gene-147.32-mRNA-1 | NA | NA       |        | Os04g0405600 | OsR498G0408505000.01.T03 | ARM repeat superfamily protein, putative isoform 1                         |
| maker-4-augustus-gene-147.7-mRNA-1  | NA | Indica   |        | Os02g0526400 | OsR498G0408502100.01.T04 | Chaperone protein ClpD, chloroplastic                                      |
| maker-4-augustus-gene-148.0-mRNA-1  | NA | NA       |        | Os04g0408600 | OsR498G0408516600.01.T01 | RAB6-interacting golgin                                                    |
| maker-4-augustus-gene-148.4-mRNA-1  | NA | NA       |        |              |                          | FBD domain-containing protein (Fragment)                                   |
| maker-4-augustus-gene-148.6-mRNA-1  | NA | Indica   |        | Os02g0528200 | OsR498G0408518200.01.T01 | 1,4-alpha-glucan branching enzyme                                          |
| maker-4-augustus-gene-149.0-mRNA-1  | NA | Indica   |        | Os04g0409600 | OsR498G0408518500.01.T07 | Histone deacetylase                                                        |
| maker-4-augustus-gene-149.20-mRNA-1 | NA | NA       |        | Os04g0410200 | OsR498G0408519000.01.T02 | Serine/threonine-protein kinase KIPK                                       |
| maker-4-augustus-gene-149.6-mRNA-1  | NA | Indica   |        | Os02g0529400 | OsR498G0408518700.01.T01 | Alkaline/neutral invertase                                                 |
| maker-4-augustus-gene-150.36-mRNA-1 | NA | Indica   |        | Os04g0411800 | OsR498G0408524500.01.T01 | AB hydrolase-1 domain-containing protein                                   |
| maker-4-augustus-gene-150.38-mRNA-1 | NA | NA       |        | Os04g0412300 | OsR498G0408526500.01.T02 | Glucan endo-13-beta-glucosidase 14                                         |
| maker-4-augustus-gene-150.40-mRNA-1 | NA | NA       |        | 0            | OsR498G0408527700.01.T04 | Bifunctional monodehydroascorbate reductase and carbonic anhydrase nec     |
| maker-4-augustus-gene-150.44-mRNA-1 | NA | NA       |        | Os04g0412900 | OsR498G0408528700.01.T01 | Protein transport protein like                                             |
| maker-4-augustus-gene-150.48-mRNA-1 | NA | NA       |        | Os04g0413200 | OsR498G0408529500.01.T01 | Beta-fructofuranosidase, insoluble isoenzyme 3                             |
| maker-4-augustus-gene-150.50-mRNA-1 | NA | NA       |        | Os04g0413500 | OsR498G0408530100.01.T01 | Beta-fructofuranosidase, insoluble isoenzyme 2                             |
| maker-4-augustus-gene-150.52-mRNA-1 | NA | NA       | NBS-TM | Os04g0413000 |                          | ABC transporter B family member 29 chloroplastic                           |
| maker-4-augustus-gene-150.56-mRNA-1 | NA | Indica   |        | Os04g0413600 | OsR498G0408530800.01.T02 | Ribosomal protein S14                                                      |
| maker-4-augustus-gene-151.36-mRNA-1 | NA | NA       |        | Os04g0414000 |                          | Mitochondrial fission protein ELM1                                         |
| maker-4-augustus-gene-151.43-mRNA-1 | NA | NA       |        | Os04g0414100 | OsR498G0408533300.01.T03 | OTU domain-containing protein 5-A                                          |
| maker-4-augustus-gene-151.48-mRNA-1 | NA | NA       |        | 0            | OsR498G0408535900.01.T01 | Glycine-rich RNA-binding protein 2                                         |
| maker-4-augustus-gene-151.51-mRNA-1 | NA | NA       |        |              |                          | Chloroplast photosystem I subunit O                                        |
| maker-4-augustus-gene-151.54-mRNA-1 | NA | Indica   |        | Os04g0415100 | OsR498G0408539300.01.T01 | Transcription repressor                                                    |
| maker-4-augustus-gene-151.58-mRNA-1 | NA | NA       |        | Os08g0487300 |                          | Transposon protein, putative, Mutator sub-class                            |
| maker-4-augustus-gene-152.35-mRNA-1 | NA | NA       |        | Os04g0415800 | OsR498G0408542500.01.T01 | AAI domain-containing protein (Fragment)                                   |
| maker-4-augustus-gene-152.41-mRNA-1 | NA | NA       |        | 0            | OsR498G0408544100.01.T06 | Thioredoxin peroxidase                                                     |
| maker-4-augustus-gene-152.43-mRNA-1 | NA | Japonica |        | Os04g0416400 | OsR498G0204017500.01.T01 | Thioredoxin peroxidase                                                     |
| maker-4-augustus-gene-152.45-mRNA-1 | NA | Indica   |        | Os04g0416500 | OsR498G0408544300.01.T01 | Double Clp-N motif-containing P-loop nucleoside triphosphate hydrolases su |
| maker-4-augustus-gene-152.50-mRNA-1 | NA | Indica   |        | Os02g0537500 | OsR498G0408543600.01.T04 | Transcription factor E2FA                                                  |
| maker-4-augustus-gene-152.57-mRNA-1 | NA | NA       |        | Os04g0416700 | OsR498G0408545200.01.T01 | VAMP protein SEC22                                                         |
| maker-4-augustus-gene-152.59-mRNA-1 | NA | NA       |        | Os04g0417000 | OsR498G0408546200.01.T02 | Aluminum-activated malate transporter                                      |
| maker-4-augustus-gene-153.41-mRNA-1 | NA | NA       |        | Os04g0417800 | OsR498G0408551400.01.T02 | Protein phosphatase type 2A regulator/ signal transducer                   |
| maker-4-augustus-gene-154.0-mRNA-1  | NA | NA       |        | Os04g0421700 |                          |                                                                            |
| maker-4-augustus-gene-154.2-mRNA-1  | NA | NA       |        | 0            | OsR498G0408565600.01.T03 | Deubiquitinating enzyme MINDY-3                                            |
| maker-4-augustus-gene-155.43-mRNA-1 | NA | NA       |        | Os04g0421900 | OsR498G0408565700.01.T01 | Exocyst complex component 2                                                |
| maker-4-augustus-gene-155.59-mRNA-1 | NA | NA       |        | Os12g0299600 |                          | CAI-1 autoinducer sensor kinase/phosphatase cqs5 isoform 1                 |
| maker-4-augustus-gene-156.3-mRNA-1  | NA | Japonica |        | Os06g0310200 | OsR498G0408570300.01.T02 | Regulator of nonsense transcripts 1-like                                   |
| maker-4-augustus-gene-162.35-mRNA-1 | NA | Indica   |        | Os04g0434900 | OsR498G0408606300.01.T04 | PsbP domain-containing protein 2 chloroplastic                             |
| maker-4-augustus-gene-162.58-mRNA-1 | NA | NA       |        | 0            | OsR498G0408606500.01.T02 | Kinesin-like protein KIN-7C mitochondrial                                  |
| maker-4-augustus-gene-162.65-mRNA-1 | NA | NA       |        | Os04g0434800 | OsR498G0408606000.01.T03 | Thylakoid-bound ascorbate peroxidase                                       |
| maker-4-augustus-gene-163.28-mRNA-1 | NA | NA       |        | Os04g0435100 | OsR498G0408606900.01.T01 | Amino-acid permease BAT1 like                                              |
| maker-4-augustus-gene-163.30-mRNA-1 | NA | NA       |        | Os04g0435700 | OsR498G0408609900.01.T01 | Ultraviolet-B receptor                                                     |
| maker-4-augustus-gene-163.35-mRNA-1 | NA | NA       |        | 0            | OsR498G0408611100.01.T01 |                                                                            |
| maker-4-augustus-gene-163.37-mRNA-1 | NA | Japonica |        | Os04g0437000 | OsR498G0408612900.01.T01 | NAC domain class transcription factor                                      |
| maker-4-augustus-gene-163.39-mRNA-1 | NA | NA       |        | Os04g0435500 | OsR498G0408608400.01.T03 | Tetrachloro-P-hydroquinone reductive dehalogenase                          |
| maker-4-augustus-gene-163.41-mRNA-1 | NA | NA       |        | Os04g0436100 |                          | 4HBT domain-containing protein                                             |
| maker-4-augustus-gene-163.43-mRNA-1 | NA | NA       |        | Os04g0436300 | OsR498G0408610800.01.T06 | Protein disulfide-isomerase                                                |
| maker-4-augustus-gene-163.48-mRNA-1 | NA | NA       |        | 0            | OsR498G0408612800.01.T04 |                                                                            |
| maker-4-augustus-gene-164.0-mRNA-1  | NA | NA       | Kinase | Os04g0437600 | OsR498G0408615000.01.T01 | Mitogen-activated protein kinase kinase kinase YODA                        |
| maker-4-augustus-gene-164.11-mRNA-1 | NA | Indica   |        | Os04g0438600 | OsR498G0408618200.01.T02 | Glycolipid transfer protein 2                                              |
| maker-4-augustus-gene-164.6-mRNA-1  | NA | NA       |        | Os04g0438300 | OsR498G0408617000.01.T02 | DUF150 domain-containing protein (Fragment)                                |
| maker-4-augustus-gene-164.9-mRNA-1  | NA | NA       |        | Os04g0438500 | OsR498G0408617600.01.T01 | Rossmann-like protein alpha/beta/alpha sandwich                            |
| maker-4-augustus-gene-165.11-mRNA-1 | NA | NA       |        | Os04g0439900 | OsR498G0408623000.01.T01 | Protein TIC 40 chloroplastic                                               |
| maker-4-augustus-gene-165.16-mRNA-1 | NA | NA       |        | Os04g0440000 | OsR498G0408623400.01.T01 | Nuclear speckle splicing regulatory protein 1                              |

|                                     |    |          |               |              |                          |                                                                      |
|-------------------------------------|----|----------|---------------|--------------|--------------------------|----------------------------------------------------------------------|
| maker-4-augustus-gene-165.21-mRNA-1 | NA | NA       |               | Os04g0440100 | OsR498G0408623600.01.T04 | Regulator of nonsense transcripts UPF3                               |
| maker-4-augustus-gene-165.27-mRNA-1 | NA | Japonica |               | Os04g0440300 | OsR498G0408625400.01.T02 | FBD domain-containing protein                                        |
| maker-4-augustus-gene-166.32-mRNA-1 | NA | NA       |               |              |                          | AlG1-type G domain-containing protein (Fragment)                     |
| maker-4-augustus-gene-166.46-mRNA-1 | NA | NA       |               | 0            | OsR498G0408627800.01.T01 | F-box domain-containing protein                                      |
| maker-4-augustus-gene-166.48-mRNA-1 | NA | NA       |               | Os04g0441800 | OsR498G0408629800.01.T01 | Proton-dependent oligopeptide transporter family                     |
| maker-4-augustus-gene-166.50-mRNA-1 | NA | NA       |               | Os04g0441900 | OsR498G0408631200.01.T01 | Cleft lip and palate transmembrane                                   |
| maker-4-augustus-gene-167.0-mRNA-1  | NA | NA       |               | Os04g0443000 |                          |                                                                      |
| maker-4-augustus-gene-167.12-mRNA-1 | NA | NA       |               | Os04g0443300 | OsR498G0408639000.01.T01 | Endoglucanase                                                        |
| maker-4-augustus-gene-167.2-mRNA-1  | NA | NA       |               | Os04g0443500 | OsR498G0408639300.01.T04 | Protein phosphatase methylesterase 1                                 |
| maker-4-augustus-gene-167.7-mRNA-1  | NA | Indica   |               | Os02g0558100 | OsR498G0408636000.01.T04 | Chloride channel protein CLC-c                                       |
| maker-4-augustus-gene-168.34-mRNA-1 | NA | NA       |               | 0            | OsR498G0408641900.01.T02 | GST N-terminal domain-containing protein                             |
| maker-4-augustus-gene-168.36-mRNA-1 | NA | Indica   |               | Os01g0558600 | OsR498G0408641900.01.T05 | GTP-binding protein YPTM1                                            |
| maker-4-augustus-gene-168.42-mRNA-1 | NA | Indica   |               | Os08g0112700 | OsR498G0408642400.01.T01 | Agamous-like MADS-box protein AGL12                                  |
| maker-4-augustus-gene-168.44-mRNA-1 | NA | NA       |               | 0            | OsR498G0408642800.01.T03 | 12-oxo-phytyldienoic acid reductase5                                 |
| maker-4-augustus-gene-168.45-mRNA-1 | NA | Indica   |               | Os08g0112700 | OsR498G0408643400.01.T01 | Agamous-like MADS-box protein AGL12                                  |
| maker-4-augustus-gene-168.49-mRNA-1 | NA | NA       |               | 0            | OsR498G0408643600.01.T04 | 12-oxo-phytyldienoic acid reductase                                  |
| maker-4-augustus-gene-168.73-mRNA-1 | NA | Indica   |               | Os01g0369900 | OsR498G0408644000.01.T01 | 12-oxophytyldienoate reductase                                       |
| maker-4-augustus-gene-168.75-mRNA-1 | NA | Indica   |               | Os01g0369900 | OsR498G0408644200.01.T02 | 12-oxo-phytyldienoic acid reductase                                  |
| maker-4-augustus-gene-170.15-mRNA-1 | NA | NA       |               | Os04g0194500 | OsR498G0407698800.01.T01 | White-brown-complex ABC transporter family                           |
| maker-4-augustus-gene-170.12-mRNA-1 | NA | NA       |               | Os04g0447500 | OsR498G0408659700.01.T02 | NAD(P)H-dependent 6'-deoxychalcone synthase                          |
| maker-4-augustus-gene-170.15-mRNA-1 | NA | NA       |               | Os04g0447600 | OsR498G0408659900.01.T01 | Non-functional NADPH-dependent codeinone reductase 2                 |
| maker-4-augustus-gene-170.28-mRNA-1 | NA | NA       |               |              |                          | FBD domain-containing protein                                        |
| maker-4-augustus-gene-170.31-mRNA-1 | NA | NA       |               | Os04g0447400 | OsR498G0408659400.01.T01 | Glutamate decarboxylase                                              |
| maker-4-augustus-gene-170.6-mRNA-1  | NA | NA       |               | 0            | OsR498G0408658500.01.T02 | Lipoxygenase 1, chloroplastic                                        |
| maker-4-augustus-gene-170.7-mRNA-1  | NA | Indica   |               | Os04g0447100 | OsR498G0408658500.01.T02 | Lipoxygenase                                                         |
| maker-4-augustus-gene-172.36-mRNA-1 | NA | Indica   |               | Os03g0390600 | OsR498G0408671900.01.T03 | Histone domain-containing protein (Fragment)                         |
| maker-4-augustus-gene-172.44-mRNA-1 | NA | NA       |               | Os04g0451200 | OsR498G0408673700.01.T01 | Glycosyltransferase                                                  |
| maker-4-augustus-gene-172.49-mRNA-1 | NA | Indica   |               | Os04g0450900 | OsR498G0408672600.01.T01 | WEB family protein, chloroplastic                                    |
| maker-4-augustus-gene-172.55-mRNA-1 | NA | NA       |               | 0            | OsR498G0408512800.01.T01 | IQ calmodulin-binding motif family protein, expressed                |
| maker-4-augustus-gene-173.13-mRNA-1 | NA | NA       |               | Os04g0453400 | OsR498G0408680000.01.T01 | Sugar transport protein 5                                            |
| maker-4-augustus-gene-174.10-mRNA-1 | NA | NA       |               | Os04g0455600 | OsR498G0408685600.01.T01 | DNA oxidative demethylase                                            |
| maker-4-augustus-gene-174.5-mRNA-1  | NA | NA       |               | Os04g0455350 | OsR498G0408685000.01.T02 |                                                                      |
| maker-4-augustus-gene-174.8-mRNA-1  | NA | NA       |               |              |                          | BUB1 N-terminal domain-containing protein                            |
| maker-4-augustus-gene-176.14-mRNA-1 | NA | Indica   |               | Os04g0460300 | OsR498G0408699100.01.T01 | Amino acid/polyamine transporter II                                  |
| maker-4-augustus-gene-176.16-mRNA-1 | NA | NA       |               | Os04g0460400 | OsR498G0408700100.01.T01 | Casparian strip membrane protein 5                                   |
| maker-4-augustus-gene-176.18-mRNA-1 | NA | NA       |               | Os04g0460500 | OsR498G0408700300.01.T04 | Molybdenum cofactor biosynthesis protein C                           |
| maker-4-augustus-gene-176.21-mRNA-1 | NA | NA       |               | Os04g0460600 | OsR498G0408701300.01.T02 | NAC transcription factor                                             |
| maker-4-augustus-gene-176.27-mRNA-1 | NA | NA       |               | Os04g0458800 | OsR498G0408693200.01.T01 |                                                                      |
| maker-4-augustus-gene-176.29-mRNA-1 | NA | NA       |               | Os04g0459000 | OsR498G0408693600.01.T01 | ATP-binding cassette containing protein                              |
| maker-4-augustus-gene-176.32-mRNA-1 | NA | NA       |               | Os04g0459600 | OsR498G0408696400.01.T01 | RAN guanine nucleotide release factor                                |
| maker-4-augustus-gene-176.38-mRNA-1 | NA | NA       |               | Os04g0459700 | OsR498G0408696800.01.T01 | Nucleosome/chromatin assembly factor A                               |
| maker-4-augustus-gene-176.4-mRNA-1  | NA | NA       |               | Os04g0459500 | OsR498G0408696100.01.T04 | Glyceraldehyde-3-phosphate dehydrogenase A, chloroplastic            |
| maker-4-augustus-gene-176.41-mRNA-1 | NA | Indica   |               | Os04g0459800 | OsR498G0408697000.01.T03 | RNA helicase                                                         |
| maker-4-augustus-gene-176.7-mRNA-1  | NA | NA       |               | Os04g0459900 | OsR498G0408697500.01.T01 | Protease Do-like 8 chloroplastic                                     |
| maker-4-augustus-gene-177.0-mRNA-1  | NA | NA       |               | Os04g0461000 | OsR498G0408703700.01.T01 | MYB transcription factor 16                                          |
| maker-4-augustus-gene-177.13-mRNA-1 | NA | Indica   |               | Os04g0461600 | OsR498G0408706800.01.T01 | Protein PLANT CADMIUM RESISTANCE 3                                   |
| maker-4-augustus-gene-177.16-mRNA-1 | NA | NA       |               | 0            | OsR498G0408707400.01.T03 |                                                                      |
| maker-4-augustus-gene-177.17-mRNA-1 | NA | NA       |               | Os04g0461800 | OsR498G0408707600.01.T01 | Formin-like protein 2                                                |
| maker-4-augustus-gene-177.2-mRNA-1  | NA | NA       |               | Os04g0461100 | OsR498G0408703900.01.T01 | Ribosomal protein PSRP-3/Ycf                                         |
| maker-4-augustus-gene-177.21-mRNA-1 | NA | NA       |               | Os04g0462300 | OsR498G0408708600.01.T03 | Lysine histidine transporter-like 6                                  |
| maker-4-augustus-gene-177.23-mRNA-1 | NA | Indica   |               | Os04g0462400 | OsR498G0408709000.01.T02 | Lysine histidine transporter 2                                       |
| maker-4-augustus-gene-177.4-mRNA-1  | NA | Indica   |               | Os02g0579600 | OsR498G0408705300.01.T01 | MADS-box transcription factor                                        |
| maker-4-augustus-gene-178.0-mRNA-1  | NA | NA       |               | Os04g0462500 | OsR498G0408709700.01.T06 | General regulatory factor2                                           |
| maker-4-augustus-gene-178.10-mRNA-1 | NA | NA       | Kinase-LRR-TM | Os04g0463000 | OsR498G0408711000.01.T01 | Putative inactive receptor kinase                                    |
| maker-4-augustus-gene-178.12-mRNA-1 | NA | NA       |               | Os04g0463400 | OsR498G0408712400.01.T01 | Vacuolar iron transporter like                                       |
| maker-4-augustus-gene-178.14-mRNA-1 | NA | NA       |               | Os04g0463500 | OsR498G0408712800.01.T02 | Glutamine amidotransferase type-1 domain-containing protein          |
| maker-4-augustus-gene-178.19-mRNA-1 | NA | NA       |               | Os04g0463700 | OsR498G0408713600.01.T02 | General negative regulator of transcription subunit 4                |
| maker-4-augustus-gene-178.21-mRNA-1 | NA | NA       |               | Os04g0463800 | OsR498G0408713600.01.T07 | Pentatricopeptide repeat-containing protein                          |
| maker-4-augustus-gene-178.22-mRNA-1 | NA | NA       |               | Os04g0464200 | OsR498G0408715400.01.T03 | Aminoaldehyde dehydrogenase 2                                        |
| maker-4-augustus-gene-178.27-mRNA-1 | NA | NA       |               | Os04g0464400 | OsR498G0408715800.01.T01 | Solute carrier family 15 (Peptide/histidine transporter), member 3/4 |
| maker-4-augustus-gene-178.3-mRNA-1  | NA | NA       |               | Os04g0463600 | OsR498G0408713300.01.T01 | L10-interacting MYB domain-containing protein                        |

|                                     |    |          |           |              |                          |                                                                            |
|-------------------------------------|----|----------|-----------|--------------|--------------------------|----------------------------------------------------------------------------|
| maker-4-augustus-gene-178.5-mRNA-1  | NA | NA       |           | Os04g0464500 | OsR498G0408716900.01.T01 | Plant UBX domain-containing protein 4                                      |
| maker-4-augustus-gene-178.8-mRNA-1  | NA | NA       |           | Os04g0462600 | OsR498G0408710000.01.T01 | Dynein light chain, cytoplasmic                                            |
| maker-4-augustus-gene-179.34-mRNA-1 | NA | NA       |           | Os04g0465000 | OsR498G0408720500.01.T01 | Sterile alpha motif (SAM) domain-containing protein                        |
| maker-4-augustus-gene-179.38-mRNA-1 | NA | NA       |           | Os04g0465600 | OsR498G0408724700.01.T01 | Major latex protein 22                                                     |
| maker-4-augustus-gene-179.40-mRNA-1 | NA | NA       |           | 0            | OsR498G0408725100.01.T01 | RNA-dependent RNA polymerase                                               |
| maker-4-augustus-gene-179.44-mRNA-1 | NA | NA       |           | Os04g0465800 | OsR498G0408725500.01.T01 | Phostensin like                                                            |
| maker-4-augustus-gene-179.47-mRNA-1 | NA | NA       |           | Os04g0464800 | OsR498G0408719400.01.T03 | CRM-domain containing factor CFM2, chloroplastic isoform X2                |
| maker-4-augustus-gene-179.52-mRNA-1 | NA | NA       |           | Os04g0464966 | OsR498G0408720200.01.T01 | F-box/FBD/LRR-repeat protein isoform A                                     |
| maker-4-augustus-gene-179.54-mRNA-1 | NA | NA       |           | Os04g0465300 | OsR498G0408721800.01.T01 | gibberellin-regulated protein 1-like                                       |
| maker-4-augustus-gene-179.56-mRNA-1 | NA | Japonica | Kinase-TM | Os04g0465900 | OsR498G0408725800.01.T01 | Serine/threonine protein kinase                                            |
| maker-4-augustus-gene-180.0-mRNA-1  | NA | NA       |           | 0            | OsR498G0408726700.01.T05 | Agmatine deiminase                                                         |
| maker-4-augustus-gene-180.15-mRNA-1 | NA | NA       |           | Os04g0467100 | OsR498G0408727600.01.T01 | 18S pre-ribosomal assembly protein gar2-related                            |
| maker-4-augustus-gene-180.18-mRNA-1 | NA | NA       |           | 0            | OsR498G0408731000.01.T02 | Ribonuclease CAF1                                                          |
| maker-4-augustus-gene-180.22-mRNA-1 | NA | Indica   |           | Os04g0467700 | OsR498G0408731200.01.T01 | Indole-3-glycerol-phosphate synthase                                       |
| maker-4-augustus-gene-180.27-mRNA-1 | NA | NA       |           |              |                          | Protection of telomeres protein 1b                                         |
| maker-4-augustus-gene-180.29-mRNA-1 | NA | NA       |           | 0            | OsR498G0408731600.01.T06 | Kinesin motor domain-containing protein (Fragment)                         |
| maker-4-augustus-gene-180.33-mRNA-1 | NA | NA       |           | 0            | OsR498G0408732400.01.T01 |                                                                            |
| maker-4-augustus-gene-180.35-mRNA-1 | NA | NA       |           | 0            | OsR498G0408732800.01.T02 |                                                                            |
| maker-4-augustus-gene-180.5-mRNA-1  | NA | NA       |           | 0            | OsR498G0408726600.01.T04 | Cell division protease ftsH isogeny 4                                      |
| maker-4-augustus-gene-180.9-mRNA-1  | NA | NA       |           | Os04g0466700 | OsR498G0408727000.01.T03 | Testis-expressed protein 10                                                |
| maker-4-augustus-gene-181.30-mRNA-1 | NA | NA       |           | Os04g0469500 | OsR498G0408737900.01.T01 | ATP-dependent 6-phosphofructokinase 2                                      |
| maker-4-augustus-gene-181.36-mRNA-1 | NA | NA       |           | Os04g0468600 | OsR498G0408734000.01.T04 | Outer membrane protein assembly factor BamA                                |
| maker-4-augustus-gene-181.39-mRNA-1 | NA | NA       |           | Os04g0469000 | OsR498G0408735400.01.T01 | Heavy metal-associated isoprenylated plant protein 16                      |
| maker-4-augustus-gene-181.40-mRNA-1 | NA | NA       |           |              |                          | Heavy metal-associated isoprenylated plant protein 16                      |
| maker-4-augustus-gene-181.41-mRNA-1 | NA | NA       |           | Os04g0469300 | OsR498G0408737000.01.T01 | Resistance protein P1kp-1                                                  |
| maker-4-augustus-gene-181.42-mRNA-1 | NA | NA       |           | Os04g0469800 | OsR498G0408738400.01.T01 | Cytochrome P450 superfamily protein (Fragment)                             |
| maker-4-augustus-gene-181.46-mRNA-1 | NA | NA       |           |              |                          | Small nuclear ribonucleoprotein Sm D1                                      |
| maker-4-augustus-gene-182.39-mRNA-1 | NA | NA       |           | Os04g0470300 | OsR498G0408740400.01.T03 | Sm domain-containing protein                                               |
| maker-4-augustus-gene-188.0-mRNA-1  | NA | NA       |           | Os04g0482300 | OsR498G0408778500.01.T01 | Btbpoz and taz domain-containing protein 1                                 |
| maker-4-augustus-gene-188.11-mRNA-1 | NA | Indica   |           | Os04g0483700 | OsR498G0612992800.01.T01 | J domain-containing protein                                                |
| maker-4-augustus-gene-188.14-mRNA-1 | NA | NA       |           | 0            | OsR498G0408783700.01.T01 | F-box domain-containing protein (Fragment)                                 |
| maker-4-augustus-gene-188.16-mRNA-1 | NA | NA       |           | Os04g0482000 | OsR498G0408777000.01.T01 | Peptide methionine sulfoxide reductase A2-1                                |
| maker-4-augustus-gene-188.18-mRNA-1 | NA | Indica   |           | Os04g0482000 | OsR498G0408777400.01.T01 | Peptide-methionine (S)-S-oxide reductase                                   |
| maker-4-augustus-gene-188.20-mRNA-1 | NA | NA       |           | Os04g0482700 | OsR498G0408780600.01.T02 | Mitochondrial inner membrane protease ATP23                                |
| maker-4-augustus-gene-188.24-mRNA-1 | NA | NA       |           | Os04g0482800 | OsR498G0408780800.01.T01 | Initiation factor eIF-4 gamma, MA3                                         |
| maker-4-augustus-gene-188.26-mRNA-1 | NA | Indica   |           | Os04g0482900 | OsR498G0408781000.01.T02 | Sushi, von Willebrand factor type A, EGF and pentraxin domain-containing p |
| maker-4-augustus-gene-188.29-mRNA-1 | NA | NA       |           | Os04g0483400 | OsR498G0408782800.01.T01 |                                                                            |
| maker-4-augustus-gene-188.3-mRNA-1  | NA | Indica   |           | Os02g0597700 | OsR498G0408781500.01.T01 | BCL-2 binding anthanogene-1                                                |
| maker-4-augustus-gene-188.32-mRNA-1 | NA | NA       |           | Os04g0483500 | OsR498G0408783200.01.T01 | B-keto acyl reductase                                                      |
| maker-4-augustus-gene-188.34-mRNA-1 | NA | NA       |           | Os04g0483600 | OsR498G0408783400.01.T02 | Kelch domain-containing protein 4                                          |
| maker-4-augustus-gene-188.5-mRNA-1  | NA | Indica   |           | Os04g0483200 | OsR498G0408782300.01.T02 | Steroid nuclear receptor ligand-binding                                    |
| maker-4-augustus-gene-189.28-mRNA-1 | NA | NA       |           | Os04g0484800 | OsR498G0408787100.01.T02 | Anaphase-promoting complex subunit 2                                       |
| maker-4-augustus-gene-189.33-mRNA-1 | NA | NA       |           | Os04g0485000 | OsR498G0408787500.01.T04 | Proteasome component (PCI) domain                                          |
| maker-4-augustus-gene-189.38-mRNA-1 | NA | NA       |           | Os04g0485200 | OsR498G0408788500.01.T02 | Plant UBX domain-containing protein 1                                      |
| maker-4-augustus-gene-189.43-mRNA-1 | NA | NA       |           | Os04g0485300 | OsR498G0408789100.01.T01 | Glucose-6-phosphate 1-dehydrogenase                                        |
| maker-4-augustus-gene-189.49-mRNA-1 | NA | NA       |           | Os08g0236700 | OsR498G0408790300.01.T01 | YqaJ viral recombinase                                                     |
| maker-4-augustus-gene-189.51-mRNA-1 | NA | NA       |           | Os04g0484900 | OsR498G0408787400.01.T01 | Elongator complex protein 3                                                |
| maker-4-augustus-gene-189.57-mRNA-1 | NA | NA       |           | Os04g0485100 | OsR498G0408787800.01.T01 | Serine/threonine protein phosphatase 2A regulatory subunit                 |
| maker-4-augustus-gene-189.59-mRNA-1 | NA | NA       |           | 0            | OsR498G0408789600.01.T03 | Cytosolic Fe-S cluster assembly factor NBP35                               |
| maker-4-augustus-gene-189.63-mRNA-1 | NA | NA       |           | Os04g0485800 | OsR498G0408790600.01.T02 | F-box protein SKIP14                                                       |
| maker-4-augustus-gene-190.0-mRNA-1  | NA | NA       |           | Os04g0486400 | OsR498G0408792500.01.T01 | Trihelix transcription factor                                              |
| maker-4-augustus-gene-190.11-mRNA-1 | NA | NA       |           | Os04g0486800 | OsR498G0408793100.01.T01 | ATP-dependent DNA helicase Q4                                              |
| maker-4-augustus-gene-190.15-mRNA-1 | NA | NA       |           | Os04g0486900 | OsR498G0408793300.01.T01 | Putative membrane protein YuiD                                             |
| maker-4-augustus-gene-190.18-mRNA-1 | NA | NA       |           | Os04g0487100 | OsR498G0408794500.01.T01 | Kelch repeat type 1                                                        |
| maker-4-augustus-gene-190.22-mRNA-1 | NA | NA       | Kinase-TM | Os04g0488000 | OsR498G0408798300.01.T05 | Cyclin-dependent kinase G-2                                                |
| maker-4-augustus-gene-190.25-mRNA-1 | NA | NA       |           | Os04g0488100 | OsR498G0408799300.01.T02 | Sister chromatid cohesion 1 protein 2                                      |
| maker-4-augustus-gene-190.31-mRNA-1 | NA | NA       |           | Os04g0486500 | OsR498G0408792800.01.T02 | Mitotic spindle assembly checkpoint protein MAD2                           |
| maker-4-augustus-gene-190.34-mRNA-1 | NA | NA       |           | 0            | OsR498G0408793600.01.T02 | Malate synthase, glyoxysomal                                               |
| maker-4-augustus-gene-190.38-mRNA-1 | NA | NA       |           | Os04g0487000 | OsR498G0408794000.01.T02 |                                                                            |
| maker-4-augustus-gene-190.4-mRNA-1  | NA | NA       |           | Os04g0486600 | OsR498G0408792900.01.T01 | Glyceraldehyde-3-phosphate dehydrogenase 2, cytosolic                      |
| maker-4-augustus-gene-190.40-mRNA-1 | NA | NA       |           | 0            | OsR498G0408795600.01.T01 | DNA-directed RNA polymerases II 24 kDa polypeptide                         |

|                                     |    |          |               |              |                          |                                                                         |
|-------------------------------------|----|----------|---------------|--------------|--------------------------|-------------------------------------------------------------------------|
| maker-4-augustus-gene-194.29-mRNA-1 | NA | NA       |               |              |                          | Transposon protein, putative, Mutator sub-class, expressed              |
| maker-4-augustus-gene-20.2-mRNA-1   | NA | NA       |               | Os04g0197100 |                          | Cysteine-rich receptor-like protein kinase 6                            |
| maker-4-augustus-gene-200.36-mRNA-1 | NA | NA       |               | Os04g0507700 | OsR498G0408864500.01.T01 | Anther-specific proline-rich protein APG                                |
| maker-4-augustus-gene-200.38-mRNA-1 | NA | NA       |               | Os04g0507900 | OsR498G0408864900.01.T06 | Diphthamide biosynthesis protein 7-like protein (Fragment)              |
| maker-4-augustus-gene-200.47-mRNA-1 | NA | NA       |               | Os04g0506900 | OsR498G0408861800.01.T02 | Phosphatidylinositol N-acetylglucosaminyltransferase subunit P-related  |
| maker-4-augustus-gene-200.60-mRNA-1 | NA | NA       |               | 0            | OsR498G0408863400.01.T06 | CLIP-associated protein-like                                            |
| maker-4-augustus-gene-200.68-mRNA-1 | NA | NA       |               | 0            | OsR498G0408864800.01.T02 | 2-phytyl-1,4-beta-naphthoquinone methyltransferase, chloroplastic       |
| maker-4-augustus-gene-201.39-mRNA-1 | NA | NA       | Kinase-TM     | 0            | OsR498G0408871500.01.T01 | Receptor-like serinethreonine-protein kinase ale2                       |
| maker-4-augustus-gene-201.44-mRNA-1 | NA | NA       |               | Os04g0509100 | OsR498G0408871700.01.T01 | C2 calcium-dependent membrane targeting                                 |
| maker-4-augustus-gene-201.49-mRNA-1 | NA | NA       |               | Os04g0509400 | OsR498G0408872700.01.T03 | Enzyme of the cupin superfamily                                         |
| maker-4-augustus-gene-201.51-mRNA-1 | NA | Indica   |               | Os04g0508500 | OsR498G0408867400.01.T02 | Transcription factor MYB62                                              |
| maker-4-augustus-gene-201.55-mRNA-1 | NA | NA       |               | 0            | OsR498G0408870000.01.T01 | General transcription factor IIH subunit                                |
| maker-4-augustus-gene-201.58-mRNA-1 | NA | NA       |               | Os04g0509200 | OsR498G0408872000.01.T04 |                                                                         |
| maker-4-augustus-gene-201.62-mRNA-1 | NA | NA       |               |              |                          | Endoribonuclease Dicer                                                  |
| maker-4-augustus-gene-202.45-mRNA-1 | NA | NA       |               | 0            | OsR498G1221698500.01.T04 | Phosphate synthase-like                                                 |
| maker-4-augustus-gene-202.49-mRNA-1 | NA | Indica   |               | Os02g0813800 | OsR498G0408876500.01.T01 | Transcriptional corepressor LEUNIG                                      |
| maker-4-augustus-gene-202.71-mRNA-1 | NA | NA       |               | Os04g0510600 | OsR498G0408877400.01.T01 | Anaphase-promoting complex subunit like                                 |
| maker-4-augustus-gene-202.73-mRNA-1 | NA | NA       |               | 0            | OsR498G0408877600.01.T02 | Mitochondrial import receptor subunit TOM9-2                            |
| maker-4-augustus-gene-202.76-mRNA-1 | NA | Indica   |               | Os04g0510900 | OsR498G0408877800.01.T01 | Plant seed peroxxygenase                                                |
| maker-4-augustus-gene-202.78-mRNA-1 | NA | NA       |               | Os04g0511200 | OsR498G0408878400.01.T01 | Peroxygenase                                                            |
| maker-4-augustus-gene-202.81-mRNA-1 | NA | NA       |               | Os04g0511400 | OsR498G0408878800.01.T04 | Inositol transporter like                                               |
| maker-4-augustus-gene-202.83-mRNA-1 | NA | NA       |               | Os04g0511600 | OsR498G0408879200.01.T02 | E3 ubiquitin-protein ligase RLIM                                        |
| maker-4-augustus-gene-202.89-mRNA-1 | NA | NA       |               | Os04g0511700 | OsR498G0408879400.01.T01 |                                                                         |
| maker-4-augustus-gene-203.0-mRNA-1  | NA | Indica   |               | Os04g0513000 | OsR498G0408883500.01.T01 | ATP synthase subunit alpha                                              |
| maker-4-augustus-gene-203.13-mRNA-1 | NA | NA       |               | Os04g0512400 | OsR498G0408881200.01.T01 | protein BREAST CANCER SUSCEPTIBILITY 1 homolog                          |
| maker-4-augustus-gene-203.16-mRNA-1 | NA | NA       | CC-LRR-NBS-TM | Os04g0512900 | OsR498G0408883400.01.T01 | Disease resistance gene analog (Fragment)                               |
| maker-4-augustus-gene-203.20-mRNA-1 | NA | NA       |               | Os04g0513100 | OsR498G0408883800.01.T02 | 4-hydroxy-7-methoxy-3-oxo-3,4-dihydro-2H-1,4-benzoxazin-2-yl glucosideb |
| maker-4-augustus-gene-203.23-mRNA-1 | NA | Indica   |               | Os03g0399000 | OsR498G0408884200.01.T01 | Pectinesterase                                                          |
| maker-4-augustus-gene-203.25-mRNA-1 | NA | NA       |               | 0            | OsR498G0408884400.01.T03 | 4-hydroxy-7-methoxy-3-oxo-3,4-dihydro-2H-1,4-benzoxazin-2-yl glucosideb |
| maker-4-augustus-gene-203.28-mRNA-1 | NA | Japonica |               | Os04g0513700 | OsR498G0408884400.01.T01 | Beta-glucosidase 16                                                     |
| maker-4-augustus-gene-203.3-mRNA-1  | NA | Indica   |               | Os02g0621300 | OsR498G0408880600.01.T03 | Aldehyde oxygenase (deformylating)                                      |
| maker-4-augustus-gene-203.33-mRNA-1 | NA | NA       |               | 0            | OsR498G0408885000.01.T02 | Pectinesterase                                                          |
| maker-4-augustus-gene-203.6-mRNA-1  | NA | NA       |               | Os04g0512300 | OsR498G0408881000.01.T02 | Actin-related protein 2/3 complex subunit 2                             |
| maker-4-augustus-gene-204.0-mRNA-1  | NA | NA       |               | Os04g0514400 | OsR498G0408886300.01.T01 | Protein disulfide isomerase pTAC5, chloroplastic                        |
| maker-4-augustus-gene-204.16-mRNA-1 | NA | NA       |               | Os04g0514500 | OsR498G0408886200.01.T06 | Pentatricopeptide repeat-containing protein mitochondrial               |
| maker-4-augustus-gene-204.17-mRNA-1 | NA | NA       |               | Os04g0514800 | OsR498G0408888200.01.T02 | Casein kinase I                                                         |
| maker-4-augustus-gene-204.24-mRNA-1 | NA | NA       |               |              |                          | 60S ribosomal protein like (Fragment)                                   |
| maker-4-augustus-gene-204.3-mRNA-1  | NA | NA       |               | Os04g0515400 | OsR498G0408890900.01.T01 | dCTP pyrophosphatase 1                                                  |
| maker-4-augustus-gene-204.6-mRNA-1  | NA | NA       |               | Os04g0515900 | OsR498G0408893100.01.T01 | NAC transcription factor                                                |
| maker-4-augustus-gene-205.0-mRNA-1  | NA | Indica   |               | Os04g0517000 | OsR498G0408898700.01.T01 | Protodermal factor 1 like                                               |
| maker-4-augustus-gene-205.11-mRNA-1 | NA | NA       |               | Os04g0516600 | OsR498G0408897800.01.T02 | L-allo-threonine aldolase                                               |
| maker-4-augustus-gene-205.15-mRNA-1 | NA | NA       |               | Os04g0517100 | OsR498G0408899800.01.T01 | Transcription factor MYB4                                               |
| maker-4-augustus-gene-205.17-mRNA-1 | NA | NA       |               | Os04g0517300 | OsR498G0408901000.01.T01 | Root UVB sensitive family                                               |
| maker-4-augustus-gene-205.22-mRNA-1 | NA | Indica   | Kinase-TM     | Os01g0364800 | OsR498G0408902600.01.T01 | Wall-associated receptor kinase-like 8                                  |
| maker-4-augustus-gene-206.0-mRNA-1  | NA | Japonica |               | Os04g0518800 | OsR498G0408908300.01.T02 | Cytokinin riboside 5'-monophosphate phosphoribohydrolase                |
| maker-4-augustus-gene-206.11-mRNA-1 | NA | NA       |               | Os04g0518100 | OsR498G0408904400.01.T01 | Phenylalanine ammonia-lyase                                             |
| maker-4-augustus-gene-206.13-mRNA-1 | NA | NA       |               |              |                          |                                                                         |
| maker-4-augustus-gene-206.16-mRNA-1 | NA | NA       |               | Os04g0518400 | OsR498G0408906400.01.T01 | Phenylalanine ammonia-lyase                                             |
| maker-4-augustus-gene-206.18-mRNA-1 | NA | NA       |               |              |                          |                                                                         |
| maker-4-augustus-gene-206.21-mRNA-1 | NA | NA       |               | Os08g0487300 | OsR498G0816350400.01.T01 | Transposon protein, putative, Mutator sub-class, expressed              |
| maker-4-augustus-gene-206.25-mRNA-1 | NA | Japonica |               | Os11g0519100 | OsR498G0407782400.01.T01 |                                                                         |
| maker-4-augustus-gene-206.5-mRNA-1  | NA | NA       |               | Os04g0518000 | OsR498G0408903800.01.T04 | Adenosine kinase                                                        |
| maker-4-augustus-gene-207.26-mRNA-1 | NA | Indica   |               | Os04g0519700 | OsR498G0408911500.01.T01 | Auxin response factor                                                   |
| maker-4-augustus-gene-207.28-mRNA-1 | NA | NA       |               | 0            | OsR498G0204301000.01.T01 | Hydroxyproline-rich glycoprotein-like                                   |
| maker-4-augustus-gene-207.30-mRNA-1 | NA | NA       |               | 0            | OsR498G0408913200.01.T04 | Zn-dependent exopeptidase superfamily protein                           |
| maker-4-augustus-gene-207.37-mRNA-1 | NA | NA       |               | 0            | OsR498G0408913800.01.T04 | S1 domain-containing protein (Fragment)                                 |
| maker-4-augustus-gene-208.46-mRNA-1 | NA | NA       |               | Os04g0521100 | OsR498G0408917700.01.T01 | Plasma membrane intrinsic protein                                       |
| maker-4-augustus-gene-208.51-mRNA-1 | NA | NA       |               | Os04g0521600 |                          | WPP domain-associated protein                                           |
| maker-4-augustus-gene-208.54-mRNA-1 | NA | NA       |               | Os04g0521800 | OsR498G0408918300.01.T02 | IAA-amino acid hydrolase                                                |
| maker-4-augustus-gene-208.59-mRNA-1 | NA | NA       |               |              |                          | Lunapark domain-containing protein                                      |
| maker-4-augustus-gene-208.61-mRNA-1 | NA | NA       |               | Os04g0522800 | OsR498G0408921300.01.T02 | Plant-specific TFIIB-related protein 1                                  |

|                                     |    |          |               |              |                          |                                                                          |
|-------------------------------------|----|----------|---------------|--------------|--------------------------|--------------------------------------------------------------------------|
| maker-4-augustus-gene-208.63-mRNA-1 | NA | NA       |               | Os04g0523000 | OsR498G0408921900.01.T01 | PsbQ-like protein 3, chloroplastic                                       |
| maker-4-augustus-gene-208.65-mRNA-1 | NA | NA       |               | Os04g0522500 | OsR498G0408919400.01.T01 | Gibberellin 2-beta-dioxygenase 6                                         |
| maker-4-augustus-gene-208.67-mRNA-1 | NA | NA       |               | Os04g0523100 | OsR498G0408922200.01.T01 | Putative homeodomain-like transcription factor superfamily protein       |
| maker-4-augustus-gene-209.0-mRNA-1  | NA | Indica   |               | Os10g0483500 | OsR498G0408923500.01.T01 | Cytokinin dehydrogenase                                                  |
| maker-4-augustus-gene-209.11-mRNA-1 | NA | Indica   |               | Os04g0524600 | OsR498G0408928500.01.T01 | Probable metal-nicotianamine transporter YSL11                           |
| maker-4-augustus-gene-209.14-mRNA-1 | NA | Indica   |               | Os04g0524500 | OsR498G0408927000.01.T03 | Probable metal-nicotianamine transporter YSL13                           |
| maker-4-augustus-gene-209.19-mRNA-1 | NA | NA       |               | Os04g0525000 | OsR498G0408929000.01.T01 | Large ribosomal RNA subunit accumulation protein YCED 2, chloroplastic   |
| maker-4-augustus-gene-209.24-mRNA-1 | NA | Indica   |               | Os04g0525100 | OsR498G0408929200.01.T01 | Glycosyltransferase                                                      |
| maker-4-augustus-gene-209.4-mRNA-1  | NA | Japonica |               | Os04g0524400 | OsR498G0408926700.01.T02 | Protein RETICULATA chloroplastic                                         |
| maker-4-augustus-gene-209.7-mRNA-1  | NA | NA       |               | Os04g0524600 | OsR498G0408928100.01.T03 | probable metal-nicotianamine transporter YSL14                           |
| maker-4-augustus-gene-21.3-mRNA-1   | NA | Indica   |               | Os04g0330200 | OsR498G0407712200.01.T01 | Jacalin-type lectin domain-containing protein                            |
| maker-4-augustus-gene-21.5-mRNA-1   | NA | NA       |               |              |                          | NB-ARC domain-containing protein                                         |
| maker-4-augustus-gene-210.47-mRNA-1 | NA | NA       |               | Os04g0527400 | OsR498G0408938700.01.T07 | Endosomal targeting BRO1-like domain-containing protein isoform 3        |
| maker-4-augustus-gene-210.49-mRNA-1 | NA | NA       |               | Os04g0527700 | OsR498G0408939100.01.T02 | Coiled-coil-helix-coiled-coil-helix domain-containing protein 4          |
| maker-4-augustus-gene-210.54-mRNA-1 | NA | NA       |               | Os04g0527800 | OsR498G0408939300.01.T01 | Mitochondrial intermembrane space import and assembly protein 40-like    |
| maker-4-augustus-gene-210.58-mRNA-1 | NA | NA       |               | Os04g0527900 | OsR498G0408939500.01.T01 | Aquaporin TIP                                                            |
| maker-4-augustus-gene-210.60-mRNA-1 | NA | NA       |               | Os04g0528100 | OsR498G0408940100.01.T07 | UPF0426 protein chloroplastic                                            |
| maker-4-augustus-gene-210.64-mRNA-1 | NA | NA       |               | Os04g0526800 | OsR498G0408935400.01.T01 | GRAM domain-containing protein                                           |
| maker-4-augustus-gene-210.66-mRNA-1 | NA | NA       |               | Os04g0527000 | OsR498G0408935800.01.T01 | GRAM domain-containing protein                                           |
| maker-4-augustus-gene-210.68-mRNA-1 | NA | NA       |               | 0            | OsR498G0408939000.01.T02 | Mitochondrial thiamine pyrophosphate carrier                             |
| maker-4-augustus-gene-210.72-mRNA-1 | NA | Japonica |               | Os04g0528000 | OsR498G0408939800.01.T01 |                                                                          |
| maker-4-augustus-gene-211.0-mRNA-1  | NA | NA       |               | Os04g0528300 | OsR498G0408940900.01.T01 | ABC transporter domain-containing protein                                |
| maker-4-augustus-gene-211.15-mRNA-1 | NA | NA       |               | Os04g0528400 | OsR498G0408941200.01.T02 | Checkpoint protein hus1                                                  |
| maker-4-augustus-gene-211.17-mRNA-1 | NA | NA       |               | Os01g0946800 | OsR498G1018926400.01.T01 | Ulp1 protease family, C-terminal catalytic domain containing protein     |
| maker-4-augustus-gene-211.19-mRNA-1 | NA | Indica   |               | Os04g0528600 | OsR498G0408943800.01.T01 | Serine/arginine repetitive matrix protein 2-like                         |
| maker-4-augustus-gene-211.9-mRNA-1  | NA | NA       |               | Os04g0529500 | OsR498G0408949500.01.T06 | Protein-serine/threonine phosphatase                                     |
| maker-4-augustus-gene-212.13-mRNA-1 | NA | NA       |               | Os04g0531100 | OsR498G0408955300.01.T02 | Elicitor-responsive protein 3                                            |
| maker-4-augustus-gene-212.17-mRNA-1 | NA | NA       |               | Os04g0531300 | OsR498G0408955900.01.T03 | tRNA-dihydrouridine synthase                                             |
| maker-4-augustus-gene-212.2-mRNA-1  | NA | Indica   |               | Os04g0530100 | OsR498G0408951300.01.T01 | Beta-expansin 3                                                          |
| maker-4-augustus-gene-212.22-mRNA-1 | NA | NA       |               | 0            | OsR498G0408956700.01.T01 | Salutaridine reductase                                                   |
| maker-4-augustus-gene-212.26-mRNA-1 | NA | Indica   |               | Os04g0531900 | OsR498G0408956900.01.T01 | Salutaridine reductase                                                   |
| maker-4-augustus-gene-212.30-mRNA-1 | NA | NA       |               | Os04g0529800 | OsR498G0408950400.01.T02 | Polyol transporter like                                                  |
| maker-4-augustus-gene-212.31-mRNA-1 | NA | NA       |               | 0            | OsR498G0408950400.01.T01 | Putative polyol transporter 4                                            |
| maker-4-augustus-gene-212.36-mRNA-1 | NA | NA       |               | Os04g0530000 |                          | Transcription factor TFIIC                                               |
| maker-4-augustus-gene-212.39-mRNA-1 | NA | NA       |               | Os04g0530300 | OsR498G0408952000.01.T01 | Putative splicing regulatory glutamine/lysine-rich protein 1             |
| maker-4-augustus-gene-212.44-mRNA-1 | NA | NA       |               | Os04g0530600 | OsR498G0408953600.01.T01 | Chloroplast thioredoxin M-type 2                                         |
| maker-4-augustus-gene-212.46-mRNA-1 | NA | NA       |               | Os04g0530700 | OsR498G0408953800.01.T02 | probable beta-D-xylosidase 6                                             |
| maker-4-augustus-gene-212.49-mRNA-1 | NA | NA       |               | Os04g0531900 | OsR498G0408957400.01.T01 | Salutaridine reductase                                                   |
| maker-4-augustus-gene-212.6-mRNA-1  | NA | NA       |               | Os04g0530400 | OsR498G0408952100.01.T01 | SNARE-complex protein Syntaxin-18 N-terminal                             |
| maker-4-augustus-gene-213.45-mRNA-1 | NA | NA       |               | 0            | OsR498G0408958500.01.T05 | Salutaridine reductase                                                   |
| maker-4-augustus-gene-213.48-mRNA-1 | NA | NA       |               | Os04g0532800 | OsR498G0408960500.01.T01 | MYB transcription factor                                                 |
| maker-4-augustus-gene-213.50-mRNA-1 | NA | NA       |               | Os04g0533000 | OsR498G0408961100.01.T06 | DEAD-box ATP-dependent RNA helicase                                      |
| maker-4-augustus-gene-213.57-mRNA-1 | NA | NA       |               | 0            | OsR498G0408963700.01.T01 | Putative non-inhibitory serpin-10                                        |
| maker-4-augustus-gene-213.59-mRNA-1 | NA | NA       |               |              |                          | SERPIN domain-containing protein (Fragment)                              |
| maker-4-augustus-gene-213.61-mRNA-1 | NA | NA       |               | Os04g0534000 | OsR498G0408964300.01.T02 | CAP10 domain-containing protein (Fragment)                               |
| maker-4-augustus-gene-213.65-mRNA-1 | NA | NA       |               | Os04g0532100 | OsR498G0408958000.01.T02 | Salutaridine reductase                                                   |
| maker-4-augustus-gene-213.69-mRNA-1 | NA | NA       |               | Os04g0532500 | OsR498G0408958800.01.T03 | LIM transcription factor                                                 |
| maker-4-augustus-gene-213.72-mRNA-1 | NA | NA       |               | Os04g0533300 | OsR498G0408962200.01.T01 | Remorin                                                                  |
| maker-4-augustus-gene-213.75-mRNA-1 | NA | NA       |               | Os04g0533500 | OsR498G0408963000.01.T03 | Ascorbate-specific transmembrane electron transporter 2                  |
| maker-4-augustus-gene-213.78-mRNA-1 | NA | Japonica |               | Os04g0533900 | OsR498G1019009000.01.T01 | HMA domain-containing protein (Fragment)                                 |
| maker-4-augustus-gene-214.0-mRNA-1  | NA | Indica   |               | Os02g0642700 | OsR498G0408964500.01.T05 | Downstream target of AGL15 2                                             |
| maker-4-augustus-gene-214.11-mRNA-1 | NA | NA       |               | Os04g0534300 | OsR498G0408965100.01.T01 | Calmodulin-related                                                       |
| maker-4-augustus-gene-214.15-mRNA-1 | NA | NA       |               | Os04g0535600 | OsR498G0408968100.01.T01 | Beta-fructofuranosidase 1                                                |
| maker-4-augustus-gene-214.17-mRNA-1 | NA | NA       |               | Os04g0534400 | OsR498G0408965400.01.T02 | MSP domain-containing protein (Fragment)                                 |
| maker-4-augustus-gene-214.21-mRNA-1 | NA | Indica   |               | Os04g0534500 | OsR498G0408965600.01.T02 | Vesicle-associated protein 1-2                                           |
| maker-4-augustus-gene-214.25-mRNA-1 | NA | NA       |               | Os04g0535400 | OsR498G0408967400.01.T06 | Bifunctional adenosine 5'-phosphosulfate phosphorylase/adenylylsulfatase |
| maker-4-augustus-gene-214.28-mRNA-1 | NA | NA       |               | 0            | OsR498G0408967400.01.T08 |                                                                          |
| maker-4-augustus-gene-214.6-mRNA-1  | NA | NA       | Kinase-LRR-TM | 0            | OsR498G0408964900.01.T01 | Putative LRR receptor-like serine/threonine-protein kinase               |
| maker-4-augustus-gene-215.4-mRNA-1  | NA | NA       |               | Os04g0536300 | OsR498G0408970400.01.T01 | C2C2-YABBY transcription factor                                          |
| maker-4-augustus-gene-215.5-mRNA-1  | NA | NA       |               | 0            | OsR498G0408971400.01.T02 | Secondary wall NAC master switch                                         |
| maker-4-augustus-gene-216.39-mRNA-1 | NA | NA       |               | Os04g0538000 | OsR498G0408982500.01.T02 | Hsp organizing protein/stress-inducible protein                          |

|                                     |    |          |           |              |                           |                                                          |
|-------------------------------------|----|----------|-----------|--------------|---------------------------|----------------------------------------------------------|
| maker-4-augustus-gene-216.43-mRNA-1 | NA | NA       |           | Os04g0538900 | OsR498G0408987300.01.T01  | glyoxalase domain-containing protein 5-like              |
| maker-4-augustus-gene-216.45-mRNA-1 | NA | NA       |           | Os04g0539000 | OsR498G0408987700.01.T01  | NAD(P)H dehydrogenase subunit M                          |
| maker-4-augustus-gene-216.47-mRNA-1 | NA | Indica   |           | Os02g0645600 | OsR498G0408990100.01.T03  | GATA transcription factor                                |
| maker-4-augustus-gene-216.50-mRNA-1 | NA | NA       |           | Os04g0537900 | OsR498G0408982000.01.T02  | Vacuolar-processing enzyme beta-isozyme 1                |
| maker-4-augustus-gene-216.59-mRNA-1 | NA | NA       |           | Os04g0538700 | OsR498G0408985800.01.T01  | ATG13 domain-containing protein (Fragment)               |
| maker-4-augustus-gene-216.61-mRNA-1 | NA | NA       |           | Os04g0538800 | OsR498G0408986600.01.T04  | Kinesin-like protein KIN-7G                              |
| maker-4-augustus-gene-216.65-mRNA-1 | NA | NA       |           | Os04g0539100 | OsR498G0408988000.01.T01  |                                                          |
| maker-4-augustus-gene-217.25-mRNA-1 | NA | NA       |           | Os04g0540200 | OsR498G0408992300.01.T02  | B-box zinc finger protein 21                             |
| maker-4-augustus-gene-217.28-mRNA-1 | NA | Japonica |           | Os04g0540300 | OsR498G0408992900.01.T03  | COBRA-like protein 6                                     |
| maker-4-augustus-gene-217.31-mRNA-1 | NA | Japonica |           | Os04g0540400 | OsR498G0408993300.01.T04  |                                                          |
| maker-4-augustus-gene-217.34-mRNA-1 | NA | Indica   |           | Os10g0512700 | OsR498G0408991600.01.T01  | SH3 domain-containing protein 2                          |
| maker-4-augustus-gene-217.41-mRNA-1 | NA | NA       |           | Os04g0540600 | OsR498G0408993800.01.T01  | Aldehyde dehydrogenase                                   |
| maker-4-augustus-gene-217.46-mRNA-1 | NA | NA       | Kinase-TM | Os04g0540900 | OsR498G0408995400.01.T01  | Leucine-rich repeat receptor protein kinase EXS          |
| maker-4-augustus-gene-217.48-mRNA-1 | NA | Indica   |           | Os04g0541100 | OsR498G0408998400.01.T01  | Trihelix transcription factor                            |
| maker-4-augustus-gene-22.52-mRNA-1  | NA | Japonica | Kinase-TM | Os04g0201900 | OsR498G0407717600.01.T01  | Non-specific serine/threonine protein kinase             |
| maker-4-augustus-gene-220.9-mRNA-1  | NA | NA       |           | Os04g0545100 | OsR498G0409015600.01.T01  | ELMO domain-containing protein A                         |
| maker-4-augustus-gene-221.69-mRNA-1 | NA | NA       |           | Os04g0549300 | OsR498G0409027800.01.T01  | Isoaspartyl peptidase/L-asparaginase 3 subunit beta like |
| maker-4-augustus-gene-226.0-mRNA-1  | NA | NA       |           |              |                           | Cyclic nucleotide-binding domain-containing protein      |
| maker-4-augustus-gene-226.16-mRNA-1 | NA | NA       |           | Os04g0557800 | OsR498G0409062200.01.T01  | Anthocyanin regulatory R-S protein-like                  |
| maker-4-augustus-gene-226.19-mRNA-1 | NA | Indica   |           | Os04g0558500 | OsR498G0409062800.01.T01  |                                                          |
| maker-4-augustus-gene-226.7-mRNA-1  | NA | NA       |           | Os04g0557500 | OsR498G0409061000.01.T01  | Anthocyanin regulatory R-S protein-like                  |
| maker-4-augustus-gene-226.9-mRNA-1  | NA | NA       |           | Os07g0115700 | OsR498G0917125000.01.T01  | Endonuclease                                             |
| maker-4-augustus-gene-227.0-mRNA-1  | NA | NA       |           | Os04g0559100 | OsR498G0409063900.01.T01  | Rop guanine nucleotide exchange factor like              |
| maker-4-augustus-gene-227.12-mRNA-1 | NA | NA       |           |              |                           | Pro-zeta-carotene desaturase, polycopene producing       |
| maker-4-augustus-gene-227.18-mRNA-1 | NA | NA       |           | Os04g0560700 | OsR498G0409068300.01.T01  |                                                          |
| maker-4-augustus-gene-227.20-mRNA-1 | NA | Indica   |           | Os04g0561000 | OsR498G0409068700.01.T01  | Mechanosensitive ion channel protein 6                   |
| maker-4-augustus-gene-227.23-mRNA-1 | NA | NA       |           | Os04g0559200 | OsR498G0409064200.01.T01  | DUF4378 domain-containing protein (Fragment)             |
| maker-4-augustus-gene-227.25-mRNA-1 | NA | NA       |           | Os04g0559400 | OsR498G0409065000.01.T01  | Branched-chain-amino-acid aminotransferase               |
| maker-4-augustus-gene-227.29-mRNA-1 | NA | NA       | Kinase    | Os04g0559800 | OsR498G0409066400.01.T05  | Putative MAPKKK family protein kinase isoform 1          |
| maker-4-augustus-gene-227.34-mRNA-1 | NA | NA       |           | Os04g0560300 | OsR498G0409067400.01.T01  | Histone lysine-specific demethylase                      |
| maker-4-augustus-gene-227.36-mRNA-1 | NA | NA       |           |              |                           | Alpha-L-fucosidase                                       |
| maker-4-augustus-gene-227.38-mRNA-1 | NA | NA       | Kinase-TM | Os04g0560600 | OsR498G0409068000.01.T01  | Calcium-dependent protein kinase                         |
| maker-4-augustus-gene-227.42-mRNA-1 | NA | Japonica |           | Os04g0561200 | OsR498G0409069000.01.T01  | Cellular retinaldehyde-binding/triple function           |
| maker-4-augustus-gene-227.5-mRNA-1  | NA | Indica   |           | Os04g0559700 | OsR498G0409066100.01.T01  | Aquaporin                                                |
| maker-4-augustus-gene-227.8-mRNA-1  | NA | Indica   |           | Os04g0560200 | OsR498G0409067100.01.T01  | Thioredoxin                                              |
| maker-4-augustus-gene-228.38-mRNA-1 | NA | NA       |           | Os04g0561500 | OsR498G0409069500.01.T04  | Prolyl oligopeptidase                                    |
| maker-4-augustus-gene-228.43-mRNA-1 | NA | NA       |           | Os04g0561600 | OsR498G0409069700.01.T04  | Coiled-coil domain-containing protein 124                |
| maker-4-augustus-gene-228.45-mRNA-1 | NA | NA       |           | Os04g0562000 | OsR498G0409070900.01.T05  | S-acyltransferase                                        |
| maker-4-augustus-gene-228.51-mRNA-1 | NA | Japonica |           | Os05g0269800 | OsR498G04090509300.01.T01 | DDE Tnp4 domain-containing protein                       |
| maker-4-augustus-gene-228.56-mRNA-1 | NA | NA       |           | Os04g0562800 |                           | DUF632 domain-containing protein                         |
| maker-4-augustus-gene-228.60-mRNA-1 | NA | NA       |           | 0            | OsR498G0409074700.01.T03  | DUF295 domain-containing protein                         |
| maker-4-augustus-gene-228.62-mRNA-1 | NA | NA       |           | Os04g0561700 | OsR498G0409070000.01.T03  | tRNA pseudouridine(55) synthase                          |
| maker-4-augustus-gene-228.69-mRNA-1 | NA | NA       |           | 0            | OsR498G0409070600.01.T01  | GDSL esterase/lipase                                     |
| maker-4-augustus-gene-228.71-mRNA-1 | NA | NA       |           | Os04g0562100 | OsR498G0409071200.01.T02  | Lysine histidine transporter 7                           |
| maker-4-augustus-gene-228.73-mRNA-1 | NA | NA       |           | 0            | OsR498G0409073800.01.T02  | O-fucosyltransferase family protein (Fragment)           |
| maker-4-augustus-gene-228.77-mRNA-1 | NA | Indica   |           | Os02g0670000 | OsR498G0409074600.01.T02  | Transmembrane protein 184C (Fragment)                    |
| maker-4-augustus-gene-229.25-mRNA-1 | NA | NA       |           | Os04g0564300 | OsR498G1222106000.01.T03  |                                                          |
| maker-4-augustus-gene-229.26-mRNA-1 | NA | Japonica |           | Os04g0564200 | OsR498G0409079100.01.T03  | TPX2 domain-containing protein                           |
| maker-4-augustus-gene-229.36-mRNA-1 | NA | NA       |           | 0            | OsR498G0409079500.01.T02  | Ser/Thr-rich protein T10 in DGCR region                  |
| maker-4-augustus-gene-229.39-mRNA-1 | NA | Indica   |           | Os04g0564600 | OsR498G0409079700.01.T04  | High mobility group box protein 2                        |
| maker-4-augustus-gene-229.42-mRNA-1 | NA | NA       | Kinase-TM |              |                           | Protein kinase domain-containing protein                 |
| maker-4-augustus-gene-229.45-mRNA-1 | NA | NA       |           |              |                           | Cyclin N-terminal domain-containing protein              |
| maker-4-augustus-gene-229.51-mRNA-1 | NA | NA       |           |              |                           | SSD domain-containing protein                            |
| maker-4-augustus-gene-229.58-mRNA-1 | NA | NA       | Kinase-TM | Os04g0563900 | OsR498G0409078000.01.T01  | probable serine/threonine-protein kinase PIX13           |
| maker-4-augustus-gene-229.60-mRNA-1 | NA | NA       |           | Os04g0564000 | OsR498G0409078800.01.T01  | RWP-RK domain-containing protein                         |
| maker-4-augustus-gene-23.32-mRNA-1  | NA | Indica   |           | Os04g0208200 | OsR498G0407728500.01.T01  | Senescence-specific cysteine protease SAG39              |
| maker-4-augustus-gene-23.34-mRNA-1  | NA | Indica   |           | Os04g0203500 | OsR498G0407727000.01.T01  | Senescence-specific cysteine protease SAG39              |
| maker-4-augustus-gene-23.36-mRNA-1  | NA | NA       |           | Os04g0208400 | OsR498G0407728800.01.T01  | FBD domain-containing protein                            |
| maker-4-augustus-gene-23.40-mRNA-1  | NA | NA       |           | Os04g0208600 | OsR498G0407730400.01.T01  | FBD domain-containing protein                            |
| maker-4-augustus-gene-230.35-mRNA-1 | NA | NA       |           | Os04g0565400 | OsR498G0409082100.01.T02  | Glycosyltransferase                                      |
| maker-4-augustus-gene-230.38-mRNA-1 | NA | NA       |           | Os04g0566100 | OsR498G0409083900.01.T05  | protein CHROMATIN REMODELING 19                          |

|                                     |    |          |           |              |                          |                                                           |
|-------------------------------------|----|----------|-----------|--------------|--------------------------|-----------------------------------------------------------|
| maker-4-augustus-gene-230.43-mRNA-1 | NA | Indica   |           | Os04g0564700 | OsR498G0409080000.01.T02 | Syntaxin-binding protein 5                                |
| maker-4-augustus-gene-230.51-mRNA-1 | NA | NA       |           | Os04g0565900 | OsR498G0409083600.01.T03 | Transcription factor bHLH111 isoform A                    |
| maker-4-augustus-gene-231.18-mRNA-1 | NA | NA       |           | Os04g0566600 | OsR498G0409089300.01.T01 | Putative Myb family transcription factor                  |
| maker-4-augustus-gene-231.21-mRNA-1 | NA | NA       |           |              |                          | Piwi domain-containing protein                            |
| maker-4-augustus-gene-231.28-mRNA-1 | NA | NA       |           | 0            | OsR498G0409090000.01.T02 | Spc97 / Spc98 family of spindle pole body (SBP) component |
| maker-4-augustus-gene-231.34-mRNA-1 | NA | NA       |           | 0            | OsR498G0409090200.01.T01 | Gamma-tubulin complex component                           |
| maker-4-augustus-gene-231.37-mRNA-1 | NA | NA       |           | Os04g0567200 | OsR498G0409090800.01.T01 | Aluminum-activated malate transporter 10                  |
| maker-4-augustus-gene-232.28-mRNA-1 | NA | NA       |           | Os04g0567700 | OsR498G0409092500.01.T01 | ORMDL family                                              |
| maker-4-augustus-gene-232.31-mRNA-1 | NA | NA       |           | Os04g0568400 | OsR498G0409097500.01.T01 | WD repeat-containing protein 44                           |
| maker-4-augustus-gene-232.35-mRNA-1 | NA | NA       |           | Os04g0568700 | OsR498G0409098300.01.T01 | Heat shock transcription factor                           |
| maker-4-augustus-gene-232.37-mRNA-1 | NA | NA       |           | Os04g0569000 | OsR498G0409099500.01.T01 | Replication factor C subunit 4                            |
| maker-4-augustus-gene-232.39-mRNA-1 | NA | NA       |           | 0            | OsR498G0409098600.01.T03 | MHD2 domain-containing protein                            |
| maker-4-augustus-gene-232.42-mRNA-1 | NA | Indica   |           | Os04g0568900 | OsR498G0409099000.01.T01 | Putative RING zinc finger domain superfamily protein      |
| maker-4-augustus-gene-233.27-mRNA-1 | NA | NA       |           | Os04g0569100 | OsR498G0409099800.01.T02 | Homeobox-leucine zipper protein ROC5                      |
| maker-4-augustus-gene-237.40-mRNA-1 | NA | NA       |           | Os04g0576800 | OsR498G0409128100.01.T02 | Polyprenol reductase 1                                    |
| maker-4-augustus-gene-24.25-mRNA-1  | NA | NA       |           | 0            | OsR498G0407736700.01.T03 |                                                           |
| maker-4-augustus-gene-24.27-mRNA-1  | NA | NA       |           |              |                          | Multidrug resistance-associated protein 4 isoform 2       |
| maker-4-augustus-gene-24.30-mRNA-1  | NA | NA       |           | Os04g0209300 | OsR498G0407734600.01.T02 | ABC transporter C family member 4                         |
| maker-4-augustus-gene-241.38-mRNA-1 | NA | NA       |           |              |                          | Putative far-red impaired response protein                |
| maker-4-augustus-gene-244.0-mRNA-1  | NA | NA       |           |              |                          | DNA replication ATP-dependent helicase/nuclease           |
| maker-4-augustus-gene-244.11-mRNA-1 | NA | NA       |           | Os04g0588700 | OsR498G0409182300.01.T01 | ABC transporter C family member 9 like                    |
| maker-4-augustus-gene-244.23-mRNA-1 | NA | NA       |           | 0            | OsR498G0409183000.01.T03 | SRR1 domain-containing protein (Fragment)                 |
| maker-4-augustus-gene-246.57-mRNA-1 | NA | NA       |           | 0            | OsR498G0409198900.01.T01 | E3 ubiquitin-protein ligase RNF14                         |
| maker-4-augustus-gene-248.48-mRNA-1 | NA | NA       |           | Os04g0598300 | OsR498G0409213000.01.T01 | Probable transcription factor FL                          |
| maker-4-augustus-gene-249.10-mRNA-1 | NA | NA       |           | Os04g0599700 | OsR498G0409218700.01.T01 | Cobalamin biosynthesis protein CobW                       |
| maker-4-augustus-gene-249.14-mRNA-1 | NA | Indica   |           | Os04g0599800 | OsR498G0409218900.01.T01 | Cell division cycle protein 20                            |
| maker-4-augustus-gene-249.7-mRNA-1  | NA | NA       |           |              |                          | UvrD-helicase domain-containing protein (Fragment)        |
| maker-4-augustus-gene-25.0-mRNA-1   | NA | NA       |           |              |                          | NAC domain-containing protein                             |
| maker-4-augustus-gene-25.3-mRNA-1   | NA | NA       |           | 0            | OsR498G0407745900.01.T01 | Vps54 domain-containing protein (Fragment)                |
| maker-4-augustus-gene-25.9-mRNA-1   | NA | NA       |           | Os04g0212200 | OsR498G0407746300.01.T01 | Two-component response regulator ORR42                    |
| maker-4-augustus-gene-250.13-mRNA-1 | NA | NA       |           | Os04g0602500 | OsR498G0409226700.01.T01 | Pectin acetylsterase                                      |
| maker-4-augustus-gene-250.18-mRNA-1 | NA | NA       |           | Os04g0602600 |                          | Pentatricopeptide repeat-containing protein chloroplastic |
| maker-4-augustus-gene-250.28-mRNA-1 | NA | Indica   |           | Os04g0602200 | OsR498G0409226200.01.T01 | Spermidine-binding periplasmic protein SpuE               |
| maker-4-augustus-gene-250.33-mRNA-1 | NA | NA       |           | Os04g0602300 |                          | Transcription factor                                      |
| maker-4-augustus-gene-250.34-mRNA-1 | NA | NA       |           | Os04g0602400 | OsR498G0409226600.01.T03 | Maltose transporter                                       |
| maker-4-augustus-gene-250.36-mRNA-1 | NA | Japonica |           | Os04g0602700 | OsR498G0409227200.01.T04 | RNA-binding (RRM/RBD/RNP motifs) family protein isoform 1 |
| maker-4-augustus-gene-250.43-mRNA-1 | NA | NA       | Kinase-TM | Os04g0602800 | OsR498G0409227400.01.T04 | Serine/threonine-protein kinase minibrain-like            |
| maker-4-augustus-gene-251.41-mRNA-1 | NA | NA       |           | 0            | OsR498G0409227900.01.T03 | Protein-S-isoprenylcysteine O-methyltransferase           |
| maker-4-augustus-gene-251.44-mRNA-1 | NA | Indica   |           | Os04g0658000 | OsR498G0409228300.01.T05 | Glucose-6-phosphate 1-epimerase                           |
| maker-4-augustus-gene-251.46-mRNA-1 | NA | NA       |           | Os04g0604800 | OsR498G0409232700.01.T01 | Xyloglucan endotransglucosylase/hydrolase                 |
| maker-4-augustus-gene-251.49-mRNA-1 | NA | NA       |           | Os04g0603200 | OsR498G0409228800.01.T05 | E3 ubiquitin-protein ligase MBR1                          |
| maker-4-augustus-gene-251.52-mRNA-1 | NA | NA       |           |              |                          |                                                           |
| maker-4-augustus-gene-251.63-mRNA-1 | NA | NA       |           | Os01g0175300 | OsR498G0510826100.01.T01 | ATP-dependent DNA helicase                                |
| maker-4-augustus-gene-251.68-mRNA-1 | NA | NA       |           | Os04g0604900 | OsR498G0409233000.01.T01 | Xyloglucan endotransglucosylase/hydrolase                 |
| maker-4-augustus-gene-252.0-mRNA-1  | NA | NA       |           | Os04g0605100 | OsR498G0409233900.01.T01 | WRKY transcription factor                                 |
| maker-4-augustus-gene-252.2-mRNA-1  | NA | NA       |           | Os04g0605900 | OsR498G0409238500.01.T05 | Ribosomal protein L7                                      |
| maker-4-augustus-gene-252.6-mRNA-1  | NA | NA       | LRR       | Os04g0605300 | OsR498G0409234800.01.T02 | Plant intracellular Ras-group-related LRR protein 1       |
| maker-4-augustus-gene-252.9-mRNA-1  | NA | NA       |           | Os04g0605500 | OsR498G0409237000.01.T02 | Calcium-transporting ATPase 9 plasma membrane-type        |
| maker-4-augustus-gene-253.13-mRNA-1 | NA | NA       |           | 0            | OsR498G0409240600.01.T01 | DNA ligase IV                                             |
| maker-4-augustus-gene-253.6-mRNA-1  | NA | NA       |           |              |                          | Mannosyl-oligosaccharide 1,2-alpha-mannosidase (Fragment) |
| maker-4-augustus-gene-254.30-mRNA-1 | NA | NA       |           | Os04g0608400 | OsR498G0409250300.01.T01 | Nuclear pore complex protein NUP88                        |
| maker-4-augustus-gene-254.34-mRNA-1 | NA | NA       |           | Os04g0608800 | OsR498G0409252300.01.T01 | Evolutionarily conserved C-terminal region 10             |
| maker-4-augustus-gene-254.37-mRNA-1 | NA | NA       |           | Os04g0607600 | OsR498G0409246400.01.T03 | Probable cation transporter HKT7                          |
| maker-4-augustus-gene-254.39-mRNA-1 | NA | NA       |           | Os04g0608100 | OsR498G0409248000.01.T01 | Galacturonokinase                                         |
| maker-4-augustus-gene-254.53-mRNA-1 | NA | NA       |           | 0            | OsR498G0409251200.01.T01 | probable nucleoredoxin 3                                  |
| maker-4-augustus-gene-255.0-mRNA-1  | NA | Indica   |           | Os04g0609100 | OsR498G0409254300.01.T02 | cwf21 domain-containing protein (Fragment)                |
| maker-4-augustus-gene-255.17-mRNA-1 | NA | NA       |           | Os04g0609700 | OsR498G0409256800.01.T04 | PHD-type domain-containing protein                        |
| maker-4-augustus-gene-255.25-mRNA-1 | NA | NA       |           | 0            | OsR498G0409257600.01.T06 | PHD-type domain-containing protein                        |
| maker-4-augustus-gene-255.27-mRNA-1 | NA | NA       |           | Os04g0610000 |                          | PHD-type domain-containing protein                        |
| maker-4-augustus-gene-255.7-mRNA-1  | NA | NA       | Kinase-TM | Os04g0608900 | OsR498G0409252600.01.T01 | serine/threonine-protein kinase STY13                     |
| maker-4-augustus-gene-256.30-mRNA-1 | NA | NA       |           |              |                          | PHD-type domain-containing protein                        |

|                                      |    |          |           |              |                          |                                                                 |
|--------------------------------------|----|----------|-----------|--------------|--------------------------|-----------------------------------------------------------------|
| maker-4-augustus-gene-256.32-mRNA-1  | NA | NA       |           | Os04g0610600 | OsR498G0409260100.01.T03 | Embryonic protein DC-8                                          |
| maker-4-augustus-gene-256.34-mRNA-1  | NA | NA       |           | 0            | OsR498G0409260900.01.T04 | Coproporphyrinogen oxidase                                      |
| maker-4-augustus-gene-256.43-mRNA-1  | NA | NA       |           | Os04g0611200 | OsR498G0409263100.01.T01 | Transferase                                                     |
| maker-4-augustus-gene-256.45-mRNA-1  | NA | NA       |           | 0            | OsR498G0409263500.01.T03 | Nucleic acid-binding                                            |
| maker-4-augustus-gene-256.48-mRNA-1  | NA | NA       |           | Os04g0611400 | OsR498G0409263700.01.T01 | Vacuolar-sorting receptor 6                                     |
| maker-4-augustus-gene-256.57-mRNA-1  | NA | NA       |           | 0            | OsR498G0409259400.01.T01 | Methionine aminopeptidase                                       |
| maker-4-augustus-gene-256.61-mRNA-1  | NA | NA       |           | Os04g0610700 | OsR498G0409260400.01.T05 | Potassium transporter                                           |
| maker-4-augustus-gene-257.55-mRNA-1  | NA | NA       |           | Os07g0565000 | OsR498G0714587600.01.T01 | Ribosomal protein S11-beta                                      |
| maker-4-augustus-gene-257.58-mRNA-1  | NA | NA       |           | Os04g0613600 | OsR498G0409269500.01.T01 | 40S ribosomal protein S11                                       |
| maker-4-augustus-gene-257.72-mRNA-1  | NA | NA       |           | Os04g0613400 | OsR498G0409269200.01.T03 | Cell differentiation                                            |
| maker-4-augustus-gene-258.56-mRNA-1  | NA | NA       |           | 0            | OsR498G0409276700.01.T07 |                                                                 |
| maker-4-augustus-gene-259.31-mRNA-1  | NA | Japonica | Kinase    | Os04g0616400 | OsR498G0409282400.01.T01 | Leucine-rich repeat transmembrane protein kinase                |
| maker-4-augustus-gene-261.0-mRNA-1   | NA | NA       |           | Os04g0619500 | OsR498G0409293700.01.T01 | OTU domain-containing protein 6B                                |
| maker-4-augustus-gene-261.9-mRNA-1   | NA | Japonica |           | Os04g0619000 | OsR498G0409291200.01.T02 | NAC transcription factor                                        |
| maker-4-augustus-gene-262.34-mRNA-1  | NA | Indica   |           | Os04g0620200 | OsR498G0409295700.01.T01 |                                                                 |
| maker-4-augustus-gene-263.39-mRNA-1  | NA | NA       |           | 0            | OsR498G0407881700.01.T01 | Transposon protein, putative, Mutator sub-class                 |
| maker-4-augustus-gene-263.63-mRNA-1  | NA | NA       |           |              |                          | Peptidase A1 domain-containing protein                          |
| maker-4-augustus-gene-265.17-mRNA-1  | NA | NA       |           | Os04g0626400 | OsR498G0409317800.01.T02 | CHL-Zea mays Chloroplastic lipocalin                            |
| maker-4-augustus-gene-265.8-mRNA-1   | NA | NA       |           | Os04g0626900 | OsR498G0409319500.01.T01 | AP-5 complex subunit zeta-1                                     |
| maker-4-augustus-gene-266.25-mRNA-1  | NA | Japonica |           | Os04g0627200 | OsR498G0409321000.01.T03 | ABC transporter domain-containing protein (Fragment)            |
| maker-4-augustus-gene-266.34-mRNA-1  | NA | NA       |           | Os04g0628400 |                          | Zinc finger BED domain-containing protein DAYSLEEPER            |
| maker-4-augustus-gene-266.36-mRNA-1  | NA | NA       |           | Os04g0628600 | OsR498G0409324800.01.T01 | UHRF1-binding protein 1-like                                    |
| maker-4-augustus-gene-266.49-mRNA-1  | NA | NA       |           | Os04g0629300 | OsR498G0409326200.01.T02 | Putative SNF2-domain/RING finger domain/helicase domain protein |
| maker-4-augustus-gene-267.106-mRNA-1 | NA | NA       |           | Os04g0631000 | OsR498G0409329700.01.T02 | Epimerase domain-containing protein (Fragment)                  |
| maker-4-augustus-gene-267.107-mRNA-1 | NA | NA       |           | Os04g0631000 | OsR498G0409329700.01.T01 | Epimerase domain-containing protein                             |
| maker-4-augustus-gene-267.112-mRNA-1 | NA | Indica   |           | Os04g0631100 | OsR498G0409330100.01.T01 | Organic cation transporter                                      |
| maker-4-augustus-gene-267.115-mRNA-1 | NA | Indica   |           | Os04g0631200 | OsR498G0409331100.01.T04 | Xyloglucan endotransglucosylase/hydrolase                       |
| maker-4-augustus-gene-267.117-mRNA-1 | NA | NA       |           | Os04g0631600 | OsR498G0409332100.01.T01 | Transcription factor bHLH112                                    |
| maker-4-augustus-gene-267.122-mRNA-1 | NA | NA       |           | Os04g0629700 | OsR498G0409327400.01.T01 | Kinesin-like protein KIN-14H                                    |
| maker-4-augustus-gene-267.42-mRNA-1  | NA | NA       |           | Os04g0630000 | OsR498G0409327700.01.T05 |                                                                 |
| maker-4-augustus-gene-267.48-mRNA-1  | NA | Japonica |           | Os04g0630100 | OsR498G0409328500.01.T03 | Epimerase domain-containing protein                             |
| maker-4-augustus-gene-268.10-mRNA-1  | NA | NA       | Kinase-TM | Os04g0632300 |                          | Non-specific serine/threonine protein kinase                    |
| maker-4-augustus-gene-268.13-mRNA-1  | NA | NA       | Kinase-TM | Os04g0632500 | OsR498G0409334400.01.T03 | Serine/threonine-protein kinase                                 |
| maker-4-augustus-gene-268.16-mRNA-1  | NA | Indica   | Kinase-TM | Os04g0632600 | OsR498G0409334600.01.T02 | Non-specific serine/threonine protein kinase                    |
| maker-4-augustus-gene-268.22-mRNA-1  | NA | Indica   | Kinase-TM | Os04g0632700 | OsR498G0409334800.01.T01 | Serine/threonine-protein kinase                                 |
| maker-4-augustus-gene-268.31-mRNA-1  | NA | NA       | Kinase-TM | Os04g0633300 | OsR498G0409336200.01.T01 | Non-specific serine/threonine protein kinase                    |
| maker-4-augustus-gene-268.36-mRNA-1  | NA | NA       | Kinase-TM | Os04g0633900 | OsR498G0409338200.01.T01 | Serine/threonine-protein kinase                                 |
| maker-4-augustus-gene-268.39-mRNA-1  | NA | Japonica | Kinase-TM | Os04g0634000 | OsR498G0409338400.01.T01 | G-type lectin 5-receptor-like serine/threonine-protein kinase   |
| maker-4-augustus-gene-268.42-mRNA-1  | NA | NA       | Kinase-TM | Os04g0634400 | OsR498G0409339000.01.T02 | Non-specific serine/threonine protein kinase                    |
| maker-4-augustus-gene-268.7-mRNA-1   | NA | NA       | Kinase-TM | Os04g0632100 | OsR498G0409332800.01.T04 | Non-specific serine/threonine protein kinase                    |
| maker-4-augustus-gene-269.56-mRNA-1  | NA | NA       |           | Os04g0635700 | OsR498G0409343100.01.T01 | Receptor-interacting protein, putative                          |
| maker-4-augustus-gene-269.58-mRNA-1  | NA | NA       |           | Os04g0635900 | OsR498G0409343500.01.T04 | Double-strand break repair protein MRE11                        |
| maker-4-augustus-gene-269.63-mRNA-1  | NA | NA       |           | Os04g0636100 | OsR498G0409344100.01.T01 | Hexosyltransferase                                              |
| maker-4-augustus-gene-269.77-mRNA-1  | NA | NA       |           | Os03g0643100 | OsR498G0713408500.01.T01 | WAC domain-containing protein                                   |
| maker-4-augustus-gene-269.80-mRNA-1  | NA | NA       |           | Os04g0635600 |                          |                                                                 |
| maker-4-augustus-gene-269.82-mRNA-1  | NA | NA       |           | Os04g0636000 | OsR498G0409343800.01.T01 | Heterogeneous nuclear ribonucleoprotein U 1                     |
| maker-4-augustus-gene-269.85-mRNA-1  | NA | NA       |           | Os04g0636200 | OsR498G0409344400.01.T01 | Micronuclear linker histone polyprotein-like protein            |
| maker-4-augustus-gene-269.87-mRNA-1  | NA | NA       |           |              |                          | Vacuolar protein sorting-associated protein 41                  |
| maker-4-augustus-gene-269.90-mRNA-1  | NA | NA       |           | Os04g0636600 | OsR498G0409345600.01.T01 | Formation of crista junctions protein 1                         |
| maker-4-augustus-gene-269.95-mRNA-1  | NA | NA       |           | Os04g0636700 | OsR498G0409345800.01.T01 | CID domain                                                      |
| maker-4-augustus-gene-269.98-mRNA-1  | NA | Japonica |           | Os04g0636800 | OsR498G0409346000.01.T01 | UBP1-associated protein 2A                                      |
| maker-4-augustus-gene-270.58-mRNA-1  | NA | Indica   |           | Os08g0175300 | OsR498G0409347700.01.T03 | White seedling2                                                 |
| maker-4-augustus-gene-271.47-mRNA-1  | NA | NA       |           | Os04g0640300 | OsR498G0409353400.01.T01 |                                                                 |
| maker-4-augustus-gene-272.0-mRNA-1   | NA | NA       |           |              |                          |                                                                 |
| maker-4-augustus-gene-272.10-mRNA-1  | NA | NA       |           |              |                          | Protein kinase domain-containing protein                        |
| maker-4-augustus-gene-272.22-mRNA-1  | NA | NA       |           | 0            | OsR498G0409361400.01.T01 |                                                                 |
| maker-4-augustus-gene-275.10-mRNA-1  | NA | NA       | LRR-TM    |              |                          | Phytosulfokine receptor 1                                       |
| maker-4-augustus-gene-275.19-mRNA-1  | NA | NA       |           | Os04g0648500 | OsR498G0409379800.01.T02 | BRCA1-associated protein isoform A                              |
| maker-4-augustus-gene-275.6-mRNA-1   | NA | NA       |           |              |                          | Transposon protein, putative, Mutator sub-class, expressed      |
| maker-4-augustus-gene-277.39-mRNA-1  | NA | NA       |           | 0            | OsR498G0409397800.01.T01 | FBD domain-containing protein                                   |
| maker-4-augustus-gene-277.41-mRNA-1  | NA | Indica   |           | Os04g0652400 | OsR498G0409398000.01.T01 | STAS domain-containing protein (Fragment)                       |



|                                      |    |          |           |              |                          |                                                                            |
|--------------------------------------|----|----------|-----------|--------------|--------------------------|----------------------------------------------------------------------------|
| maker-4-augustus-gene-278.0-mRNA-1   | NA | NA       |           | Os04g0652600 |                          | Ubiquitinyl hydrolase 1                                                    |
| maker-4-augustus-gene-278.12-mRNA-1  | NA | Indica   |           | Os04g0653000 | OsR498G0409402300.01.T02 | Tify domain-containing protein (Fragment)                                  |
| maker-4-augustus-gene-278.17-mRNA-1  | NA | NA       |           |              |                          | Vacuolar cation/proton exchanger                                           |
| maker-4-augustus-gene-278.22-mRNA-1  | NA | NA       |           | Os04g0652500 | OsR498G0409398600.01.T02 | Golgin candidate 2                                                         |
| maker-4-augustus-gene-278.31-mRNA-1  | NA | NA       |           | Os04g0652900 | OsR498G0409400600.01.T04 | Aminoacyl-tRNA hydrolase                                                   |
| maker-4-augustus-gene-278.35-mRNA-1  | NA | NA       |           | Os04g0653100 | OsR498G0409402600.01.T02 | Protein FATTY ACID EXPORT 2 chloroplastic                                  |
| maker-4-augustus-gene-278.6-mRNA-1   | NA | NA       |           | Os04g0652700 | OsR498G0409400300.01.T02 | Aspergillus nuclease S(1)                                                  |
| maker-4-augustus-gene-278.7-mRNA-1   | NA | NA       |           |              |                          | Aspergillus nuclease S(1)                                                  |
| maker-4-augustus-gene-28.36-mRNA-1   | NA | NA       |           | 0            | OsR498G1019263000.01.T04 | Serrate RNA effector molecule (Fragment)                                   |
| maker-4-augustus-gene-28.45-mRNA-1   | NA | NA       |           | Os04g0218900 | OsR498G0407752500.01.T03 | TRAF-type domain-containing protein                                        |
| maker-4-augustus-gene-280.15-mRNA-1  | NA | NA       |           | Os04g0656500 | OsR498G0409415100.01.T01 | Squamosa promoter-binding-like protein 8                                   |
| maker-4-augustus-gene-280.17-mRNA-1  | NA | NA       |           | 0            | OsR498G0409410600.01.T01 | Ethylene-responsive transcription factor ERF003                            |
| maker-4-augustus-gene-280.19-mRNA-1  | NA | NA       |           | Os04g0656800 | OsR498G0409416200.01.T01 | Peroxidase                                                                 |
| maker-4-augustus-gene-280.2-mRNA-1   | NA | NA       |           | Os04g0655600 | OsR498G0409410300.01.T03 |                                                                            |
| maker-4-augustus-gene-283.11-mRNA-1  | NA | Indica   |           | Os04g0661900 | OsR498G0409432700.01.T01 | 26S proteasome regulatory particle non-ATPase subunit 8                    |
| maker-4-augustus-gene-283.46-mRNA-1  | NA | NA       |           | Os04g0661800 | OsR498G0409432600.01.T02 | Mediator of RNA polymerase II transcription subunit 7                      |
| maker-4-augustus-gene-284.10-mRNA-1  | NA | NA       |           | Os04g0663500 | OsR498G0409438300.01.T01 | U11/U12 small nuclear ribonucleoprotein 25 kDa                             |
| maker-4-augustus-gene-284.11-mRNA-1  | NA | Indica   |           | Os04g0662700 | OsR498G0409435600.01.T02 | GTP cyclohydrolase 1                                                       |
| maker-4-augustus-gene-284.17-mRNA-1  | NA | Indica   |           | Os04g0663200 | OsR498G0409438000.01.T01 | Zinc finger CCH domain-containing protein 6                                |
| maker-4-augustus-gene-284.29-mRNA-1  | NA | NA       |           | Os04g0664400 | OsR498G0409441200.01.T01 | Auxin response factor                                                      |
| maker-4-augustus-gene-285.11-mRNA-1  | NA | NA       |           | Os04g0665800 | OsR498G0409449300.01.T04 | probable plastid-lipid-associated protein 13, chloroplastic                |
| maker-4-augustus-gene-285.17-mRNA-1  | NA | NA       |           | 0            | OsR498G0409445000.01.T04 | Beta-fructofuranosidase, insoluble isoenzyme 6                             |
| maker-4-augustus-gene-285.7-mRNA-1   | NA | NA       |           | Os04g0665700 | OsR498G0409449300.01.T02 | Putative plastid-lipid-associated protein 13 chloroplastic                 |
| maker-4-augustus-gene-286.16-mRNA-1  | NA | NA       |           | Os04g0667900 |                          | Regulatory protein RecX                                                    |
| maker-4-augustus-gene-286.35-mRNA-1  | NA | NA       |           | 0            | OsR498G0409455400.01.T03 | Ubiquitin carboxyl-terminal hydrolase                                      |
| maker-4-augustus-gene-286.41-mRNA-1  | NA | NA       |           | Os04g0667800 | OsR498G0409456400.01.T05 | UBC core domain-containing protein (Fragment)                              |
| maker-4-augustus-gene-287.102-mRNA-1 | NA | Indica   |           | Os04g0670400 | OsR498G0409462600.01.T04 | SEC-C motif-containing protein / OTU-like cysteine protease family protein |
| maker-4-augustus-gene-287.49-mRNA-1  | NA | NA       |           | Os04g0668800 | OsR498G0409459100.01.T01 | Thiol-disulfide oxidoreductase DCC isoform 1                               |
| maker-4-augustus-gene-287.51-mRNA-1  | NA | NA       |           |              |                          | Putative EH-domain-containing protein 1                                    |
| maker-4-augustus-gene-287.58-mRNA-1  | NA | Indica   |           | Os04g0670000 | OsR498G0409461700.01.T04 | Reticulon-like protein (Fragment)                                          |
| maker-4-augustus-gene-287.68-mRNA-1  | NA | Indica   |           | Os04g0668900 | OsR498G0409459400.01.T07 | Ubiquinol oxidase                                                          |
| maker-4-augustus-gene-287.76-mRNA-1  | NA | NA       |           | Os04g0669500 | OsR498G0409460800.01.T01 | Acyl-protein thioesterase 1                                                |
| maker-4-augustus-gene-287.82-mRNA-1  | NA | NA       |           | Os04g0669600 | OsR498G0409461000.01.T01 | Carboxylesterase SOBER1                                                    |
| maker-4-augustus-gene-287.84-mRNA-1  | NA | NA       |           | Os04g0669700 |                          | Acyl-protein thioesterase, putative                                        |
| maker-4-augustus-gene-287.85-mRNA-1  | NA | NA       |           | Os04g0669800 | OsR498G0409461000.01.T06 | S-methyl-5-thioribose kinase                                               |
| maker-4-augustus-gene-287.96-mRNA-1  | NA | NA       |           | Os04g0669800 | OsR498G0409461600.01.T02 | S-methyl-5-thioribose kinase                                               |
| maker-4-augustus-gene-288.25-mRNA-1  | NA | Indica   |           | Os04g0670800 | OsR498G0409463700.01.T01 | Plant UBX domain-containing protein 7                                      |
| maker-4-augustus-gene-288.32-mRNA-1  | NA | NA       |           | Os04g0670900 | OsR498G0409464600.01.T01 | Shattering protein (Fragment)                                              |
| maker-4-augustus-gene-288.34-mRNA-1  | NA | Indica   |           | Os03g0130400 | OsR498G0409465400.01.T01 | Adenylate kinase                                                           |
| maker-4-augustus-gene-288.37-mRNA-1  | NA | NA       |           | Os04g0671200 | OsR498G0409465600.01.T01 | Polyamine oxidase 4                                                        |
| maker-4-augustus-gene-288.39-mRNA-1  | NA | NA       |           | Os04g0671300 | OsR498G0409465800.01.T01 | Polyamine oxidase 5                                                        |
| maker-4-augustus-gene-29.2-mRNA-1    | NA | NA       |           | 0            | OsR498G1221160700.01.T01 | Transposon protein, putative, CACTA, En/Spm sub-class                      |
| maker-4-augustus-gene-296.20-mRNA-1  | NA | NA       | Kinase-TM | 0            | OsR498G0409524800.01.T04 | Serine/threonine-protein kinase STY46                                      |
| maker-4-augustus-gene-296.6-mRNA-1   | NA | NA       |           |              |                          |                                                                            |
| maker-4-augustus-gene-298.34-mRNA-1  | NA | NA       | Kinase-TM | Os04g0689400 | OsR498G0409533700.01.T01 | Serine/threonine protein kinase                                            |
| maker-4-augustus-gene-298.51-mRNA-1  | NA | Japonica |           | Os04g0688500 | OsR498G0409530800.01.T02 | Peroxidase                                                                 |
| maker-4-augustus-gene-298.55-mRNA-1  | NA | NA       |           | Os04g0689300 | OsR498G0409533400.01.T01 | PI-PLC X domain-containing protein                                         |
| maker-4-augustus-gene-30.0-mRNA-1    | NA | NA       |           | Os04g0221000 | OsR498G0407755400.01.T01 |                                                                            |
| maker-4-augustus-gene-30.4-mRNA-1    | NA | NA       |           | Os04g0221600 | OsR498G0407756000.01.T02 | PHD domain-containing protein                                              |
| maker-4-augustus-gene-300.10-mRNA-1  | NA | NA       |           | 0            | OsR498G0409543100.01.T01 | Ribonuclease P                                                             |
| maker-4-augustus-gene-300.7-mRNA-1   | NA | NA       |           | Os04g0692400 | OsR498G0409542700.01.T04 | probable methyltransferase PMT26                                           |
| maker-4-augustus-gene-301.25-mRNA-1  | NA | NA       |           | Os04g0655600 | OsR498G0409410300.01.T04 |                                                                            |
| maker-4-augustus-gene-301.3-mRNA-1   | NA | NA       |           | Os03g0340600 |                          |                                                                            |
| maker-4-augustus-gene-301.31-mRNA-1  | NA | NA       | Kinase-TM | Os04g0689400 | OsR498G0409533700.01.T02 | Receptor-like protein kinase                                               |
| maker-4-augustus-gene-301.35-mRNA-1  | NA | NA       |           | 0            | OsR498G0102369900.01.T01 | DNA excision repair protein ERCC-8                                         |
| maker-4-augustus-gene-301.41-mRNA-1  | NA | NA       |           | 0            | OsR498G0409410600.01.T01 | Ethylene-responsive transcription factor ERF003                            |
| maker-4-augustus-gene-301.43-mRNA-1  | NA | NA       |           | Os09g0373200 | OsR498G0917293100.01.T01 | Strictosidine synthase 3                                                   |
| maker-4-augustus-gene-301.45-mRNA-1  | NA | NA       |           | Os04g0689300 | OsR498G0409533400.01.T01 | PI-PLC X domain-containing protein                                         |
| maker-4-augustus-gene-301.47-mRNA-1  | NA | NA       |           | Os02g0307300 | OsR498G0203524400.01.T01 | General transcription factor 3C polypeptide 2                              |
| maker-4-augustus-gene-301.5-mRNA-1   | NA | NA       |           | 0            | OsR498G0409548900.01.T01 | Serine/threonine-protein kinase                                            |
| maker-4-augustus-gene-33.0-mRNA-1    | NA | NA       |           |              |                          | Vacuolar protein sorting-associated protein 33 like                        |

|                                    |    |          |           |              |                          |                                                           |
|------------------------------------|----|----------|-----------|--------------|--------------------------|-----------------------------------------------------------|
| maker-4-augustus-gene-33.6-mRNA-1  | NA | NA       |           | Os04g0223300 | OsR498G0407761800.01.T01 | L-ascorbate peroxidase                                    |
| maker-4-augustus-gene-33.9-mRNA-1  | NA | NA       |           | Os04g0223500 | OsR498G0407762000.01.T01 | Flavin-containing monooxygenase                           |
| maker-4-augustus-gene-34.4-mRNA-1  | NA | Indica   |           | Os04g0224900 | OsR498G0407764800.01.T05 | Glycerol-3-phosphate dehydrogenase                        |
| maker-4-augustus-gene-36.31-mRNA-1 | NA | NA       |           | Os04g0227500 | OsR498G0407777300.01.T02 | DSBA-like thioredoxin domain containing protein           |
| maker-4-augustus-gene-36.33-mRNA-1 | NA | NA       |           | Os04g0228000 |                          | Aspartic proteinase nepenthesin-2                         |
| maker-4-augustus-gene-36.35-mRNA-1 | NA | NA       |           | Os04g0228400 | OsR498G0407781500.01.T01 | Expansin                                                  |
| maker-4-augustus-gene-36.37-mRNA-1 | NA | NA       |           | Os04g0228100 | OsR498G0407780400.01.T01 | Coiled-coil domain-containing protein 155 (Fragment)      |
| maker-4-augustus-gene-37.0-mRNA-1  | NA | NA       |           | Os04g0229100 | OsR498G0407783600.01.T01 | Cinnamyl alcohol dehydrogenase                            |
| maker-4-augustus-gene-39.25-mRNA-1 | NA | NA       |           | Os04g0233400 | OsR498G0407801400.01.T01 | Plasma membrane intrinsic protein subtype 2 aquaporin     |
| maker-4-augustus-gene-39.28-mRNA-1 | NA | NA       |           | Os04g0234600 | OsR498G0407805800.01.T01 | Sedoheptulose-1,7-bisphosphatase, chloroplastic           |
| maker-4-augustus-gene-41.0-mRNA-1  | NA | NA       |           | Os04g0244400 | OsR498G0407814900.01.T01 | Microsomal prostaglandin E synthase 2                     |
| maker-4-augustus-gene-41.10-mRNA-1 | NA | NA       |           | Os04g0244800 | OsR498G0407816200.01.T01 | HMA domain-containing protein                             |
| maker-4-augustus-gene-41.13-mRNA-1 | NA | NA       |           | 0            | OsR498G0407816800.01.T01 | Formin-like protein 12                                    |
| maker-4-augustus-gene-41.4-mRNA-1  | NA | NA       |           | Os04g0244500 | OsR498G0407815300.01.T06 | Methyltransferase                                         |
| maker-4-augustus-gene-43.43-mRNA-1 | NA | NA       |           | Os04g0309600 | OsR498G0407829000.01.T02 | Sucrose synthase                                          |
| maker-4-augustus-gene-43.48-mRNA-1 | NA | Indica   |           | Os04g0249600 | OsR498G0407829400.01.T03 | Rhodanese-like domain-containing protein 17               |
| maker-4-augustus-gene-43.50-mRNA-1 | NA | NA       |           | Os04g0194500 | OsR498G0407698800.01.T01 | White-brown-complex ABC transporter family                |
| maker-4-augustus-gene-45.0-mRNA-1  | NA | NA       |           |              |                          |                                                           |
| maker-4-augustus-gene-46.0-mRNA-1  | NA | NA       |           | 0            | OsR498G0407837000.01.T02 | Cleavage and polyadenylation specificity factor subunit 1 |
| maker-4-augustus-gene-47.25-mRNA-1 | NA | NA       |           | 0            | OsR498G0407840400.01.T03 | SNARE-interacting protein KEULE                           |
| maker-4-augustus-gene-48.0-mRNA-1  | NA | NA       |           | Os04g0254000 | OsR498G0407846900.01.T01 | 4-hydroxy-tetrahydrodipicolinate synthase                 |
| maker-4-augustus-gene-51.0-mRNA-1  | NA | NA       |           | Os05g0422200 | OsR498G0612271200.01.T01 | TLDc domain-containing protein (Fragment)                 |
| maker-4-augustus-gene-54.1-mRNA-1  | NA | NA       |           | 0            | OsR498G0815936400.01.T01 |                                                           |
| maker-4-augustus-gene-55.36-mRNA-1 | NA | NA       |           | Os04g0266900 | OsR498G0407887500.01.T01 | Transketolase                                             |
| maker-4-augustus-gene-55.39-mRNA-1 | NA | NA       |           |              |                          | Calcium-binding outer membrane-like protein               |
| maker-4-augustus-gene-55.42-mRNA-1 | NA | NA       |           | 0            | OsR498G0407887400.01.T03 | Methyl binding domain113                                  |
| maker-4-augustus-gene-55.47-mRNA-1 | NA | Indica   |           | Os02g0265550 | OsR498G0407890300.01.T01 | Early light-induced protein, chloroplastic                |
| maker-4-augustus-gene-6.33-mRNA-1  | NA | NA       |           | Os04g0178400 | OsR498G0407644200.01.T01 |                                                           |
| maker-4-augustus-gene-6.34-mRNA-1  | NA | NA       |           | Os04g0178400 | OsR498G0407644200.01.T01 |                                                           |
| maker-4-augustus-gene-62.41-mRNA-1 | NA | Indica   |           | Os04g0278200 | OsR498G0407922700.01.T01 | kinesin light chain 3 isoform X3                          |
| maker-4-augustus-gene-62.50-mRNA-1 | NA | NA       |           | 0            | OsR498G0407924400.01.T01 | FMN-linked oxidoreductase superfamily protein             |
| maker-4-augustus-gene-63.10-mRNA-1 | NA | NA       |           | Os04g0281900 | OsR498G0407929700.01.T01 |                                                           |
| maker-4-augustus-gene-63.13-mRNA-1 | NA | Indica   |           | Os08g0529800 | OsR498G0407927400.01.T01 | Myzus persicae-induced lipase 1                           |
| maker-4-augustus-gene-63.3-mRNA-1  | NA | NA       |           |              |                          | CYTH domain-containing protein                            |
| maker-4-augustus-gene-63.7-mRNA-1  | NA | Japonica |           | Os04g0280500 | OsR498G0407926900.01.T01 | F-box domain-containing protein                           |
| maker-4-augustus-gene-64.2-mRNA-1  | NA | NA       |           | Os04g0282400 | OsR498G0407932400.01.T02 | Flowering-promoting factor 1                              |
| maker-4-augustus-gene-65.32-mRNA-1 | NA | NA       |           | 0            | OsR498G0407939800.01.T01 | Actin associated protein                                  |
| maker-4-augustus-gene-65.35-mRNA-1 | NA | NA       |           | 0            | OsR498G0407940400.01.T04 | Centromere protein O                                      |
| maker-4-augustus-gene-65.42-mRNA-1 | NA | NA       |           | Os04g0284600 | OsR498G0407941200.01.T01 | 26S proteasome regulatory subunit 6A homolog A            |
| maker-4-augustus-gene-65.46-mRNA-1 | NA | NA       |           | Os04g0284900 | OsR498G0407941400.01.T01 | Endochitinase 2-like                                      |
| maker-4-augustus-gene-66.41-mRNA-1 | NA | NA       | Kinase-TM | Os04g0286000 |                          | Calcium binding EGF domain containing protein, expressed  |
| maker-4-augustus-gene-66.42-mRNA-1 | NA | NA       |           | 0            | OsR498G0407946500.01.T01 | Wall-associated kinase 2                                  |
| maker-4-augustus-gene-68.40-mRNA-1 | NA | Japonica |           | Os04g0288100 | OsR498G0816248400.01.T01 | Germin-like protein 8-14                                  |
| maker-4-augustus-gene-71.0-mRNA-1  | NA | Japonica |           | Os04g0293300 | OsR498G0407896300.01.T03 | Tropinone reductase                                       |
| maker-4-augustus-gene-77.0-mRNA-1  | NA | Indica   |           | Os04g0300600 | OsR498G0407987600.01.T01 | Basic helix-loop-helix transcription factor               |
| maker-4-augustus-gene-82.41-mRNA-1 | NA | NA       |           | Os04g0308500 | OsR498G0408024600.01.T01 | Jasmonate-induced protein                                 |
| maker-4-augustus-gene-82.44-mRNA-1 | NA | NA       |           |              |                          |                                                           |
| maker-4-augustus-gene-82.47-mRNA-1 | NA | NA       |           | Os04g0308401 | OsR498G0408024700.01.T01 | Jasmonate-induced protein                                 |
| maker-4-augustus-gene-82.51-mRNA-1 | NA | NA       |           | Os04g0309600 | OsR498G0407829000.01.T02 | Sucrose synthase                                          |
| maker-4-augustus-gene-83.36-mRNA-1 | NA | NA       |           | Os04g0308401 | OsR498G0408024700.01.T01 | Jasmonate-induced protein                                 |
| maker-4-augustus-gene-83.43-mRNA-1 | NA | NA       |           | Os04g0308500 | OsR498G0408024600.01.T01 | Jasmonate-induced protein                                 |
| maker-4-augustus-gene-83.49-mRNA-1 | NA | Indica   |           | Os04g0310500 | OsR498G0408025600.01.T01 | NADH-ubiquinone oxidoreductase 10.5 kDa subunit           |
| maker-4-augustus-gene-84.6-mRNA-1  | NA | NA       |           | Os04g0311400 | OsR498G0408028500.01.T01 | Cysteine protease                                         |
| maker-4-augustus-gene-85.0-mRNA-1  | NA | Indica   |           | Os09g0120033 | OsR498G0408032700.01.T01 |                                                           |
| maker-4-augustus-gene-85.2-mRNA-1  | NA | NA       | CC-NBS    | 0            | OsR498G0408112900.01.T01 | Putative NBS-LRR class RGA                                |
| maker-4-augustus-gene-85.4-mRNA-1  | NA | NA       |           |              |                          | Ribosome-associated, YjgA                                 |
| maker-4-augustus-gene-85.6-mRNA-1  | NA | NA       |           |              |                          | Thaumatococcus-like protein 1                             |
| maker-4-augustus-gene-86.32-mRNA-1 | NA | NA       | CC-NBS-TM | 0            | OsR498G0408112900.01.T01 | Putative NBS-LRR class RGA                                |
| maker-4-augustus-gene-87.22-mRNA-1 | NA | NA       |           |              |                          | Transposon protein, putative, Mutator sub-class           |
| maker-4-augustus-gene-89.0-mRNA-1  | NA | NA       |           | Os04g0329500 | OsR498G0408052500.01.T02 | DUF295 domain-containing protein (Fragment)               |
| maker-4-augustus-gene-89.4-mRNA-1  | NA | NA       |           | Os10g0343500 |                          |                                                           |

|                                     |    |          |               |              |                          |                                                                              |
|-------------------------------------|----|----------|---------------|--------------|--------------------------|------------------------------------------------------------------------------|
| maker-4-augustus-gene-91.23-mRNA-1  | NA | NA       |               | Os04g0326300 | OsR498G0408072900.01.T02 | tRNA (adenine(58)-N(1))-methyltransferase                                    |
| maker-4-augustus-gene-91.27-mRNA-1  | NA | NA       |               | 0            | OsR498G0408076500.01.T04 | 7-hydroxymethyl chlorophyll a reductase chloroplastic                        |
| maker-4-augustus-gene-91.40-mRNA-1  | NA | NA       |               | Os04g0326000 | OsR498G0408115100.01.T01 | Sister chromatid cohesion protein PDS5 B-B                                   |
| maker-4-augustus-gene-91.45-mRNA-1  | NA | NA       |               | Os04g0320200 | OsR498G0408076800.01.T01 | Pentatricopeptide repeat                                                     |
| maker-4-augustus-gene-92.0-mRNA-1   | NA | Japonica |               | Os04g0321100 | OsR498G0816044700.01.T01 | Glycosyltransferase                                                          |
| maker-4-augustus-gene-92.11-mRNA-1  | NA | NA       |               | Os04g0321700 | OsR498G0408083200.01.T03 | Carboxypeptidase                                                             |
| maker-4-augustus-gene-92.18-mRNA-1  | NA | NA       |               | Os04g0321800 | OsR498G0408083400.01.T01 | PPM-type phosphatase domain-containing protein                               |
| maker-4-augustus-gene-92.6-mRNA-1   | NA | NA       |               | Os04g0321600 | OsR498G0408082700.01.T01 | FACT complex subunit                                                         |
| maker-4-augustus-gene-92.7-mRNA-1   | NA | NA       |               | Os11g0426400 | OsR498G1119990700.01.T01 | Phytoecyanin domain-containing protein (Fragment)                            |
| maker-4-augustus-gene-92.8-mRNA-1   | NA | NA       |               |              |                          | Phytoecyanin domain-containing protein                                       |
| maker-4-augustus-gene-93.0-mRNA-1   | NA | NA       |               | 0            | OsR498G0408086300.01.T01 | DDE Tnp4 domain-containing protein                                           |
| maker-4-augustus-gene-93.2-mRNA-1   | NA | NA       |               | Os01g0946800 | OsR498G1018926400.01.T01 | Ulp1 protease family, C-terminal catalytic domain containing protein, expres |
| maker-4-augustus-gene-95.17-mRNA-1  | NA | NA       |               | Os04g0326000 | OsR498G0408115100.01.T01 | Sister chromatid cohesion protein PDS5 B-B                                   |
| maker-4-augustus-gene-96.50-mRNA-1  | NA | NA       |               | 0            | OsR498G0408211200.01.T01 | Translation initiation factor                                                |
| maker-4-augustus-gene-96.51-mRNA-1  | NA | NA       |               |              |                          |                                                                              |
| maker-4-augustus-gene-96.56-mRNA-1  | NA | Japonica | CC-NBS-TM     | Os04g0470500 | OsR498G0408741100.01.T01 | Disease resistance protein RPS2                                              |
| maker-4-augustus-gene-96.57-mRNA-1  | NA | NA       |               |              |                          | Small nuclear ribonucleoprotein Sm D1                                        |
| maker-4-augustus-gene-96.59-mRNA-1  | NA | NA       |               | Os04g0470300 | OsR498G0408740400.01.T03 | Sm domain-containing protein                                                 |
| maker-4-augustus-gene-96.65-mRNA-1  | NA | NA       |               | Os04g0536300 | OsR498G0408970400.01.T01 | C2C2-YABBY transcription factor                                              |
| maker-4-augustus-gene-97.0-mRNA-1   | NA | NA       |               | Os11g0602900 | OsR498G1120476500.01.T01 | Peptidyl-prolyl cis-trans isomerase                                          |
| maker-4-augustus-gene-97.3-mRNA-1   | NA | NA       |               | Os04g0326300 | OsR498G0408118000.01.T02 | tRNA (adenine(58)-N(1))-methyltransferase                                    |
| maker-4-augustus-gene-99.32-mRNA-1  | NA | NA       |               | Os04g0328900 | OsR498G0408135500.01.T01 | Expansin-like CBD domain-containing protein                                  |
| maker-4-augustus-gene-99.34-mRNA-1  | NA | NA       |               | Os04g0330400 |                          |                                                                              |
| maker-4-augustus-gene-99.39-mRNA-1  | NA | NA       |               | 0            | OsR498G1119933000.01.T01 |                                                                              |
| maker-4-augustus-gene-99.40-mRNA-1  | NA | NA       |               | Os04g0329500 | OsR498G0408139600.01.T01 | DUF295 domain-containing protein (Fragment)                                  |
| maker-4-augustus-gene-99.44-mRNA-1  | NA | NA       |               |              |                          | DUF295 domain-containing protein (Fragment)                                  |
| maker-4-augustus-gene-99.46-mRNA-1  | NA | Indica   |               | Os04g0330200 | OsR498G0408142400.01.T01 | Jacalin-type lectin domain-containing protein                                |
| maker-4-augustus-gene-99.48-mRNA-1  | NA | NA       |               | Os04g0201000 | OsR498G0408144600.01.T01 | NB-ARC domain-containing protein                                             |
| maker-5-augustus-gene-0.29-mRNA-1   | NA | NA       |               | Os05g0100100 | OsR498G0509554500.01.T03 |                                                                              |
| maker-5-augustus-gene-0.31-mRNA-1   | NA | NA       |               | 0            | OsR498G0509556900.01.T02 | Phospholipid-transporting ATPase                                             |
| maker-5-augustus-gene-0.33-mRNA-1   | NA | Indica   |               | Os01g0109700 | OsR498G0509555200.01.T06 | Paired amphipathic helix protein Sin3                                        |
| maker-5-augustus-gene-1.34-mRNA-1   | NA | NA       |               | Os05g0101200 | OsR498G0509558300.01.T06 | Peroxin-14                                                                   |
| maker-5-augustus-gene-1.41-mRNA-1   | NA | Indica   | Kinase-TM     | Os01g0110500 | OsR498G0509557200.01.T07 | Proline-rich receptor-like protein kinase PERK8                              |
| maker-5-augustus-gene-1.45-mRNA-1   | NA | NA       |               | Os05g0100800 | OsR498G0509557400.01.T02 | Nucleic acid-binding                                                         |
| maker-5-augustus-gene-1.47-mRNA-1   | NA | Indica   |               | Os01g0108000 | OsR498G0509557800.01.T02 | NB-ARC domain-containing protein                                             |
| maker-5-augustus-gene-1.53-mRNA-1   | NA | NA       |               | 0            | OsR498G0509558600.01.T01 |                                                                              |
| maker-5-augustus-gene-1.55-mRNA-1   | NA | NA       |               | Os05g0101400 | OsR498G0509558800.01.T01 | Large subunit ribosomal protein L28                                          |
| maker-5-augustus-gene-1.57-mRNA-1   | NA | NA       |               | Os05g0101600 | OsR498G0509559200.01.T02 | Abcisic acid 8'-hydroxylase                                                  |
| maker-5-augustus-gene-1.59-mRNA-1   | NA | NA       |               | Os05g0102500 | OsR498G0509562400.01.T04 | Autophagy-related 2                                                          |
| maker-5-augustus-gene-101.5-mRNA-1  | NA | Indica   | Kinase-LRR-TM | Os04g0291900 | OsR498G0510192800.01.T06 | Non-specific serine/threonine protein kinase                                 |
| maker-5-augustus-gene-103.5-mRNA-1  | NA | NA       | Kinase-LRR-TM | Os04g0291900 | OsR498G0510192800.01.T06 | Non-specific serine/threonine protein kinase                                 |
| maker-5-augustus-gene-104.30-mRNA-1 | NA | NA       |               | Os10g0127700 | OsR498G0510199300.01.T01 | Methionyl-tRNA formyltransferase                                             |
| maker-5-augustus-gene-104.35-mRNA-1 | NA | Indica   | LRR-TM        | Os04g0291900 | OsR498G0510203700.01.T01 | Non-specific serine/threonine protein kinase                                 |
| maker-5-augustus-gene-105.23-mRNA-1 | NA | NA       |               | 0            | OsR498G0510209200.01.T01 |                                                                              |
| maker-5-augustus-gene-105.27-mRNA-1 | NA | Indica   |               | Os05g0267001 | OsR498G0510210000.01.T02 | Putative F-box/kelch-repeat protein-like                                     |
| maker-5-augustus-gene-107.33-mRNA-1 | NA | NA       |               | Os09g0352400 | OsR498G0917225800.01.T05 | RNA polymerase II transcription factor B subunit 2                           |
| maker-5-augustus-gene-107.35-mRNA-1 | NA | NA       |               |              |                          |                                                                              |
| maker-5-augustus-gene-107.36-mRNA-1 | NA | NA       |               |              |                          |                                                                              |
| maker-5-augustus-gene-107.37-mRNA-1 | NA | Indica   |               | Os05g0267732 | OsR498G0510213400.01.T01 |                                                                              |
| maker-5-augustus-gene-107.65-mRNA-1 | NA | NA       |               | Os05g0267800 | OsR498G0510214400.01.T02 | CRAL-TRIO domain-containing protein (Fragment)                               |
| maker-5-augustus-gene-107.68-mRNA-1 | NA | NA       |               |              |                          |                                                                              |
| maker-5-augustus-gene-108.31-mRNA-1 | NA | Indica   |               | Os01g0279400 | OsR498G0510217500.01.T01 | MFS domain-containing protein                                                |
| maker-5-augustus-gene-108.34-mRNA-1 | NA | NA       |               | Os05g0268500 | OsR498G0510217800.01.T07 | Carboxypeptidase                                                             |
| maker-5-augustus-gene-108.37-mRNA-1 | NA | NA       |               | Os05g0269100 | OsR498G0510219400.01.T01 |                                                                              |
| maker-5-augustus-gene-108.39-mRNA-1 | NA | NA       |               | 0            | OsR498G0510219800.01.T01 | Voltage-dependent anion channel                                              |
| maker-5-augustus-gene-109.0-mRNA-1  | NA | NA       |               | Os05g0270000 | OsR498G0510222700.01.T01 | Large subunit ribosomal protein L25                                          |
| maker-5-augustus-gene-109.10-mRNA-1 | NA | NA       |               | Os05g0269500 | OsR498G0510221400.01.T02 | HAP2-GCS1 domain-containing protein (Fragment)                               |
| maker-5-augustus-gene-109.14-mRNA-1 | NA | NA       |               | Os05g0269800 |                          | DDE Tnp4 domain-containing protein                                           |
| maker-5-augustus-gene-109.20-mRNA-1 | NA | NA       |               | Os05g0270200 | OsR498G0510224000.01.T01 | SUN domain-containing protein (Fragment)                                     |
| maker-5-augustus-gene-109.22-mRNA-1 | NA | Indica   |               | Os04g0295100 | OsR498G0510225800.01.T01 | Ribonuclease P                                                               |
| maker-5-augustus-gene-109.3-mRNA-1  | NA | NA       |               | 0            | OsR498G0510226300.01.T01 | WLM domain-containing protein (Fragment)                                     |

|                                     |    |          |              |                          |                                                                           |
|-------------------------------------|----|----------|--------------|--------------------------|---------------------------------------------------------------------------|
| maker-5-augustus-gene-109.5-mRNA-1  | NA | NA       | Os08g0500900 | OsR498G0816402500.01.T04 | 5'-phosphoribosylglycinamide transformylase                               |
| maker-5-augustus-gene-110.0-mRNA-1  | NA | Indica   | Os05g0271300 | OsR498G0510230100.01.T04 | Ribonuclease III domain                                                   |
| maker-5-augustus-gene-110.6-mRNA-1  | NA | NA       | 0            | OsR498G0510234300.01.T01 | GRF zinc finger family protein, expressed                                 |
| maker-5-augustus-gene-110.7-mRNA-1  | NA | Indica   | Os05g0272800 | OsR498G0510236300.01.T01 | Retrovirus-related Pol polyprotein from transposon TNT 1-94               |
| maker-5-augustus-gene-111.0-mRNA-1  | NA | NA       | Os05g0272800 | OsR498G0510237900.01.T02 | Retrovirus-related Pol polyprotein from transposon TNT 1-94               |
| maker-5-augustus-gene-111.2-mRNA-1  | NA | NA       | 0            | OsR498G0510238900.01.T01 | ATP-dependent DNA helicase                                                |
| maker-5-augustus-gene-111.4-mRNA-1  | NA | NA       | Os05g0273500 | OsR498G0510241100.01.T01 |                                                                           |
| maker-5-augustus-gene-111.6-mRNA-1  | NA | NA       | Os05g0272900 | OsR498G0510238200.01.T01 | Endoplasmic reticulum transmembrane protein (Fragment)                    |
| maker-5-augustus-gene-111.8-mRNA-1  | NA | NA       | Os05g0273800 | OsR498G0510242400.01.T01 | Alpha/beta hydrolase-1                                                    |
| maker-5-augustus-gene-112.0-mRNA-1  | NA | NA       | 0            | OsR498G0510244700.01.T02 | DNA mismatch repair protein MSH2                                          |
| maker-5-augustus-gene-112.4-mRNA-1  | NA | NA       | Os05g0274300 | OsR498G0510244900.01.T02 | G domain-containing protein (Fragment)                                    |
| maker-5-augustus-gene-113.31-mRNA-1 | NA | NA       | Os05g0274700 | OsR498G0510247500.01.T01 | Ribosomal protein L15                                                     |
| maker-5-augustus-gene-113.36-mRNA-1 | NA | NA       |              |                          |                                                                           |
| maker-5-augustus-gene-113.40-mRNA-1 | NA | NA       | Os05g0275700 | OsR498G0510250400.01.T01 | Peroxisome bioproteinsis protein 2                                        |
| maker-5-augustus-gene-114.0-mRNA-1  | NA | NA       | Os05g0276100 | OsR498G0510252100.01.T02 | Cation/H+ antiporter 19                                                   |
| maker-5-augustus-gene-114.2-mRNA-1  | NA | NA       | Os05g0276500 | OsR498G0510255600.01.T01 | Expansin                                                                  |
| maker-5-augustus-gene-114.4-mRNA-1  | NA | NA       | Os05g0277000 | OsR498G0510258600.01.T01 | Expansin                                                                  |
| maker-5-augustus-gene-115.0-mRNA-1  | NA | NA       | Os05g0277500 | OsR498G0510262500.01.T01 | Germin-like protein 5-1                                                   |
| maker-5-augustus-gene-115.2-mRNA-1  | NA | Indica   | Os05g0277300 | OsR498G0510260000.01.T05 | PCRf domain-containing protein                                            |
| maker-5-augustus-gene-116.22-mRNA-1 | NA | NA       | Os05g0278500 | OsR498G0510266000.01.T01 | Acyl transferase 5                                                        |
| maker-5-augustus-gene-117.27-mRNA-1 | NA | NA       | Os05g0279400 | OsR498G0510269100.01.T01 | RING-type E3 ubiquitin transferase                                        |
| maker-5-augustus-gene-117.30-mRNA-1 | NA | NA       | 0            | OsR498G0510270100.01.T04 | DNase I-like superfamily protein isoform 2                                |
| maker-5-augustus-gene-117.36-mRNA-1 | NA | NA       | Os05g0279900 | OsR498G0510271100.01.T01 | Polygalacturonase                                                         |
| maker-5-augustus-gene-117.38-mRNA-1 | NA | NA       |              |                          | tRNA pseudouridine synthase                                               |
| maker-5-augustus-gene-117.39-mRNA-1 | NA | NA       | 0            | OsR498G0510269000.01.T04 | tRNA pseudouridine synthase                                               |
| maker-5-augustus-gene-118.20-mRNA-1 | NA | NA       | Os05g0280200 | OsR498G0510273200.01.T01 | Gtp-binding regulatory protein rgp2                                       |
| maker-5-augustus-gene-118.22-mRNA-1 | NA | NA       | Os05g0280500 | OsR498G0510274800.01.T01 | PlsC domain-containing protein                                            |
| maker-5-augustus-gene-119.21-mRNA-1 | NA | NA       | Os05g0281400 | OsR498G0510282100.01.T02 | Inorganic diphosphatase                                                   |
| maker-5-augustus-gene-119.23-mRNA-1 | NA | NA       |              |                          |                                                                           |
| maker-5-augustus-gene-12.17-mRNA-1  | NA | NA       | Os05g0121900 | OsR498G0509627800.01.T01 | Sugar phosphate/phosphate translocator                                    |
| maker-5-augustus-gene-12.19-mRNA-1  | NA | NA       | 0            | OsR498G0509629200.01.T01 |                                                                           |
| maker-5-augustus-gene-12.7-mRNA-1   | NA | NA       | 0            | OsR498G0509629300.01.T01 | HECT domain-containing protein (Fragment)                                 |
| maker-5-augustus-gene-121.29-mRNA-1 | NA | NA       |              |                          |                                                                           |
| maker-5-augustus-gene-125.0-mRNA-1  | NA | NA       | 0            | OsR498G0100689400.01.T01 | Group 4 grass pollen allergen                                             |
| maker-5-augustus-gene-125.2-mRNA-1  | NA | NA       | Os05g0287800 | OsR498G0510322300.01.T04 | Sphingomyelin synthase-like domain                                        |
| maker-5-augustus-gene-125.7-mRNA-1  | NA | NA       | 0            | OsR498G0100689400.01.T01 | Transcription regulator                                                   |
| maker-5-augustus-gene-126.0-mRNA-1  | NA | NA       | Os02g0221300 | OsR498G0203236700.01.T04 | Eukaryotic initiation factor 4A-7                                         |
| maker-5-augustus-gene-127.0-mRNA-1  | NA | Japonica | Os05g0341100 | OsR498G0510560100.01.T01 | Neprosin domain-containing protein                                        |
| maker-5-augustus-gene-127.3-mRNA-1  | NA | NA       | Os05g0341100 |                          | Neprosin domain-containing protein                                        |
| maker-5-augustus-gene-127.4-mRNA-1  | NA | NA       | Os05g0341100 |                          | Neprosin domain-containing protein                                        |
| maker-5-augustus-gene-129.19-mRNA-1 | NA | NA       | Os05g0289400 | OsR498G0510328400.01.T01 | Crooked neck                                                              |
| maker-5-augustus-gene-129.24-mRNA-1 | NA | NA       | 0            | OsR498G0510334000.01.T03 | phosphatidylinositol N-acetylglucosaminyltransferase subunit GPI1 isoform |
| maker-5-augustus-gene-130.23-mRNA-1 | NA | NA       | 0            | OsR498G0510334010.01.T09 |                                                                           |
| maker-5-augustus-gene-131.41-mRNA-1 | NA | NA       |              |                          |                                                                           |
| maker-5-augustus-gene-131.43-mRNA-1 | NA | NA       | Os05g0292200 | OsR498G0510346900.01.T01 | Transcription initiation factor TFIIA large subunit                       |
| maker-5-augustus-gene-131.48-mRNA-1 | NA | NA       | Os05g0291700 | OsR498G0510344200.01.T01 | Plastid transcriptionally active 16                                       |
| maker-5-augustus-gene-132.0-mRNA-1  | NA | NA       | Os05g0292800 | OsR498G0510348500.01.T01 | High-light-induced protein chloroplastic                                  |
| maker-5-augustus-gene-132.2-mRNA-1  | NA | NA       | Os05g0293500 | OsR498G0510352000.01.T01 | Pectate lyase                                                             |
| maker-5-augustus-gene-133.24-mRNA-1 | NA | NA       | Os05g0295100 | OsR498G0510358500.01.T07 |                                                                           |
| maker-5-augustus-gene-133.25-mRNA-1 | NA | NA       | Os05g0295100 | OsR498G0510358500.01.T07 | digestive organ expansion factor homolog                                  |
| maker-5-augustus-gene-133.42-mRNA-1 | NA | NA       | Os05g0294600 | OsR498G0510354800.01.T01 | Pentatricopeptide repeat-containing protein chloroplastic                 |
| maker-5-augustus-gene-133.44-mRNA-1 | NA | NA       | 0            | OsR498G0510359400.01.T03 | Myosin heavy chain striated muscle                                        |
| maker-5-augustus-gene-133.49-mRNA-1 | NA | NA       | 0            | OsR498G0510360200.01.T02 | Acetyl-CoA carboxylase                                                    |
| maker-5-augustus-gene-133.54-mRNA-1 | NA | NA       | 0            | OsR498G0510361200.01.T10 | CDP-diacylglycerol synthase                                               |
| maker-5-augustus-gene-134.0-mRNA-1  | NA | NA       |              |                          | Lactoylglycathione lyase                                                  |
| maker-5-augustus-gene-134.10-mRNA-1 | NA | NA       |              |                          | SHSP domain-containing protein (Fragment)                                 |
| maker-5-augustus-gene-134.6-mRNA-1  | NA | NA       | Os05g0295900 | OsR498G0510362200.01.T02 | RIX1 domain-containing protein                                            |
| maker-5-augustus-gene-135.41-mRNA-1 | NA | NA       | Os05g0297900 | OsR498G0510371300.01.T01 | Signal peptidase I                                                        |
| maker-5-augustus-gene-135.45-mRNA-1 | NA | NA       | 0            | OsR498G0510371000.01.T01 | NB-ARC domain-containing protein                                          |
| maker-5-augustus-gene-136.0-mRNA-1  | NA | Indica   | Os05g0298200 | OsR498G0510373100.01.T04 | death-associated protein kinase 1-like                                    |
| maker-5-augustus-gene-136.2-mRNA-1  | NA | NA       | Os05g0299100 |                          |                                                                           |

|                                     |    |          |               |              |                          |                                                                            |
|-------------------------------------|----|----------|---------------|--------------|--------------------------|----------------------------------------------------------------------------|
| maker-5-augustus-gene-136.4-mRNA-1  | NA | NA       |               | Os05g0299200 |                          | Putative Golgi transport protein 1                                         |
| maker-5-augustus-gene-136.8-mRNA-1  | NA | NA       |               | Os05g0299300 | OsR498G0510376800.01.T03 | WD repeat-containing protein 91                                            |
| maker-5-augustus-gene-137.0-mRNA-1  | NA | NA       |               | Os05g0299500 | OsR498G0510378100.01.T04 | Solute carrier family 35 member F1                                         |
| maker-5-augustus-gene-137.5-mRNA-1  | NA | NA       |               | Os05g0300700 | OsR498G0510384700.01.T03 | DDT domain-containing protein (Fragment)                                   |
| maker-5-augustus-gene-138.0-mRNA-1  | NA | NA       |               | Os05g0301500 | OsR498G0510392500.01.T05 | Dolichyl-diphosphooligosaccharide--protein glycosyltransferase subunit 1   |
| maker-5-augustus-gene-138.19-mRNA-1 | NA | NA       |               | Os05g0302300 | OsR498G0510395600.01.T01 | Lysine-specific demethylase                                                |
| maker-5-augustus-gene-138.6-mRNA-1  | NA | NA       |               | Os05g0301600 | OsR498G0510392700.01.T02 | Phosphoprotein phosphatase inhibitors                                      |
| maker-5-augustus-gene-138.9-mRNA-1  | NA | NA       |               | Os05g0301700 | OsR498G0510393200.01.T03 | Cytochrome c1 1 heme protein mitochondrial                                 |
| maker-5-augustus-gene-139.0-mRNA-1  | NA | Indica   |               | Os05g0303000 | OsR498G0510400300.01.T01 | Chloroplast heat shock protein 70                                          |
| maker-5-augustus-gene-140.7-mRNA-1  | NA | NA       |               | Os05g0304600 | OsR498G0510408500.01.T01 | Lipoxygenase                                                               |
| maker-5-augustus-gene-141.23-mRNA-1 | NA | NA       |               | Os05g0306000 | OsR498G0510414800.01.T01 | GOLD domain-containing protein                                             |
| maker-5-augustus-gene-141.9-mRNA-1  | NA | NA       | Kinase-LRR-TM | 0            | OsR498G0510414500.01.T01 | Serine/threonine protein kinase                                            |
| maker-5-augustus-gene-143.0-mRNA-1  | NA | NA       |               | 0            | OsR498G0510418900.01.T01 | Hippocampus abundant transcript 1 protein isoform B                        |
| maker-5-augustus-gene-143.4-mRNA-1  | NA | Japonica |               | Os05g0307200 | OsR498G0510419200.01.T04 | Pentatricopeptide repeat-containing protein isoform A                      |
| maker-5-augustus-gene-143.7-mRNA-1  | NA | NA       |               | 0            | OsR498G1119303800.01.T02 | Double-stranded RNA-binding protein 8                                      |
| maker-5-augustus-gene-145.39-mRNA-1 | NA | NA       |               | Os05g0310500 | OsR498G0510436100.01.T03 | Cathepsin B heavy chain like                                               |
| maker-5-augustus-gene-145.43-mRNA-1 | NA | NA       |               | Os05g0310600 | OsR498G0510436600.01.T01 | LRAT domain-containing protein (Fragment)                                  |
| maker-5-augustus-gene-146.0-mRNA-1  | NA | NA       |               | Os08g0299000 | OsR498G0815695900.01.T05 | UPF0103/Mediator of ErbB2-driven cell motility (Memo-related)              |
| maker-5-augustus-gene-146.15-mRNA-1 | NA | NA       |               | Os05g0311500 | OsR498G0510441500.01.T01 | LURP1-related protein domain containing protein                            |
| maker-5-augustus-gene-146.2-mRNA-1  | NA | NA       |               | Os08g0299000 | OsR498G0815695900.01.T02 | Memo domain-containing protein                                             |
| maker-5-augustus-gene-146.4-mRNA-1  | NA | NA       |               | Os05g0310800 | OsR498G0510437100.01.T01 | Coatomer subunit delta                                                     |
| maker-5-augustus-gene-147.0-mRNA-1  | NA | NA       |               | 0            | OsR498G0510444600.01.T03 | Mediator of RNA polymerase II transcription subunit 33A                    |
| maker-5-augustus-gene-152.33-mRNA-1 | NA | Japonica |               | Os05g0318300 | OsR498G1119671000.01.T02 | RNase III domain-containing protein (Fragment)                             |
| maker-5-augustus-gene-154.32-mRNA-1 | NA | NA       |               | Os05g0321900 | OsR498G0510489900.01.T01 | WRKY transcription factor 75                                               |
| maker-5-augustus-gene-154.34-mRNA-1 | NA | NA       |               | Os05g0322900 | OsR498G0510491900.01.T01 | WRKY-type transcription factor 45-2                                        |
| maker-5-augustus-gene-154.40-mRNA-1 | NA | Indica   | Kinase-TM     | Os05g0323800 | OsR498G0510496300.01.T04 | protein ACTIVITY OF BC1 COMPLEX KINASE 3, chloroplastic                    |
| maker-5-augustus-gene-155.0-mRNA-1  | NA | NA       |               | Os05g0323900 | OsR498G0510496500.01.T02 | Manganese superoxide dismutase                                             |
| maker-5-augustus-gene-155.8-mRNA-1  | NA | NA       |               | 0            | OsR498G0510497000.01.T01 | N2,N2-dimethylguanosine tRNA methyltransferase                             |
| maker-5-augustus-gene-162.17-mRNA-1 | NA | NA       |               | 0            | OsR498G0510534010.01.T01 | YTH domain-containing protein                                              |
| maker-5-augustus-gene-162.19-mRNA-1 | NA | NA       |               | Os05g0334400 | OsR498G0510534000.01.T01 | Heat shock protein DnaJ                                                    |
| maker-5-augustus-gene-163.1-mRNA-1  | NA | NA       |               | Os05g0334400 | OsR498G0510534000.01.T01 | Heat shock protein DnaJ                                                    |
| maker-5-augustus-gene-163.2-mRNA-1  | NA | NA       |               | Os05g0334400 | OsR498G0510534000.01.T01 | Heat shock protein DnaJ                                                    |
| maker-5-augustus-gene-165.35-mRNA-1 | NA | Japonica |               | Os05g0339200 | OsR498G0510555700.01.T02 | SAM domain-containing protein                                              |
| maker-5-augustus-gene-166.33-mRNA-1 | NA | NA       |               | Os05g0341100 |                          | Neprosin domain-containing protein                                         |
| maker-5-augustus-gene-166.36-mRNA-1 | NA | NA       |               | Os05g0341600 | OsR498G0510561200.01.T01 | Ras-related protein Rab-21                                                 |
| maker-5-augustus-gene-167.32-mRNA-1 | NA | NA       |               | Os12g0275500 | OsR498G1221283500.01.T01 |                                                                            |
| maker-5-augustus-gene-168.0-mRNA-1  | NA | NA       |               | Os05g0343400 | OsR498G0510567700.01.T02 | WRKY53-superfamily of TFs having WRKY and zinc finger domains              |
| maker-5-augustus-gene-169.33-mRNA-1 | NA | NA       |               | 0            | OsR498G0510592600.01.T01 | NADH dehydrogenase-like complex L                                          |
| maker-5-augustus-gene-169.36-mRNA-1 | NA | Indica   |               | Os05g0348100 | OsR498G0510592600.01.T01 | NADH dehydrogenase-like complex L                                          |
| maker-5-augustus-gene-169.40-mRNA-1 | NA | Indica   |               | Os05g0348100 | OsR498G0510592600.01.T01 | NADH dehydrogenase-like complex L                                          |
| maker-5-augustus-gene-169.44-mRNA-1 | NA | Indica   |               | Os05g0348100 | OsR498G0510592600.01.T01 | NADH dehydrogenase-like complex L                                          |
| maker-5-augustus-gene-169.48-mRNA-1 | NA | Indica   |               | Os05g0348100 | OsR498G0510592600.01.T01 | NADH dehydrogenase-like complex L                                          |
| maker-5-augustus-gene-169.52-mRNA-1 | NA | Indica   |               | Os05g0348100 | OsR498G0510592600.01.T01 | NADH dehydrogenase-like complex L                                          |
| maker-5-augustus-gene-170.53-mRNA-1 | NA | NA       |               | Os05g0345400 | OsR498G0510584800.01.T02 | N-terminal acetyltransferase B complex auxiliary subunit NAA25             |
| maker-5-augustus-gene-171.0-mRNA-1  | NA | NA       |               | Os05g0344400 | OsR498G0510581000.01.T01 |                                                                            |
| maker-5-augustus-gene-172.5-mRNA-1  | NA | NA       |               | Os02g0513700 |                          | HAT dimerisation domain-containing protein-like                            |
| maker-5-augustus-gene-172.7-mRNA-1  | NA | NA       |               |              |                          | Putative carboxylic ester hydrolase                                        |
| maker-5-augustus-gene-174.0-mRNA-1  | NA | NA       |               | 0            | OsR498G0510611100.01.T03 | TATA box-binding protein-associated factor RNA polymerase I subunit B      |
| maker-5-augustus-gene-174.10-mRNA-1 | NA | Indica   | Kinase-TM     | Os05g0353500 | OsR498G0510613800.01.T01 | Protein MALE DISCOVERER 2                                                  |
| maker-5-augustus-gene-174.4-mRNA-1  | NA | NA       |               | Os05g0353300 | OsR498G0510612700.01.T01 | Pentatricopeptide repeat-containing protein chloroplastic                  |
| maker-5-augustus-gene-174.8-mRNA-1  | NA | NA       |               | Os05g0353400 | OsR498G0510613500.01.T04 | Importin subunit beta-1 like                                               |
| maker-5-augustus-gene-175.19-mRNA-1 | NA | NA       |               |              |                          | Anaphase-promoting complex subunit 1                                       |
| maker-5-augustus-gene-175.24-mRNA-1 | NA | NA       |               | Os05g0354400 | OsR498G0510618200.01.T02 | PMR5 N-terminal domain, PC-Esterase, Protein trichome birefringence-like 2 |
| maker-5-augustus-gene-176.0-mRNA-1  | NA | NA       |               | 0            | OsR498G0510622700.01.T01 | Aamy domain-containing protein                                             |
| maker-5-augustus-gene-176.11-mRNA-1 | NA | NA       |               | Os05g0357100 | OsR498G0510631900.01.T06 | Exonuclease mut-7                                                          |
| maker-5-augustus-gene-176.16-mRNA-1 | NA | Indica   |               | Os05g0355300 | OsR498G0510624200.01.T01 | RING-CH-type domain-containing protein                                     |
| maker-5-augustus-gene-176.21-mRNA-1 | NA | Japonica |               | Os05g0356700 | OsR498G0510629600.01.T01 | Trichome birefringence-like 33                                             |
| maker-5-augustus-gene-176.5-mRNA-1  | NA | Indica   |               | Os01g0303800 | OsR498G0510625500.01.T01 | Usp domain-containing protein (Fragment)                                   |
| maker-5-augustus-gene-176.7-mRNA-1  | NA | NA       |               | 0            | OsR498G0510627100.01.T02 | Lipoxygenase domain-containing protein                                     |
| maker-5-augustus-gene-176.9-mRNA-1  | NA | NA       |               | Os05g0355900 | OsR498G0510627700.01.T01 | PORR domain-containing protein                                             |
| maker-5-augustus-gene-177.40-mRNA-1 | NA | NA       |               | Os05g0357200 | OsR498G0510632500.01.T01 | Nicotinamide adenine dinucleotide transporter like                         |

|                                     |    |          |           |              |                          |                                                                            |
|-------------------------------------|----|----------|-----------|--------------|--------------------------|----------------------------------------------------------------------------|
| maker-5-augustus-gene-177.46-mRNA-1 | NA | NA       |           | 0            | OsR498G0510635500.01.T01 | Auxin-induced protein 5NG4                                                 |
| maker-5-augustus-gene-177.47-mRNA-1 | NA | NA       |           |              |                          | EamA domain-containing protein                                             |
| maker-5-augustus-gene-177.50-mRNA-1 | NA | NA       |           | Os05g0357600 | OsR498G0510636300.01.T01 | developmentally-regulated G-protein 2-like                                 |
| maker-5-augustus-gene-177.56-mRNA-1 | NA | NA       |           | 0            | OsR498G0510636700.01.T01 | CAAX prenyl protease 2                                                     |
| maker-5-augustus-gene-177.63-mRNA-1 | NA | NA       |           | Os05g0358400 | OsR498G0510639100.01.T01 | Butirosin biosynthesis                                                     |
| maker-5-augustus-gene-177.67-mRNA-1 | NA | Indica   |           | Os01g0303800 | OsR498G0510635800.01.T01 | Usp domain-containing protein                                              |
| maker-5-augustus-gene-177.72-mRNA-1 | NA | NA       |           | Os05g0357800 | OsR498G0510637000.01.T04 | Lysophospholipid acyltransferase LPEAT1                                    |
| maker-5-augustus-gene-177.74-mRNA-1 | NA | Indica   |           | Os05g0358000 | OsR498G0510637400.01.T05 | Protein DEHYDRATION-INDUCED 19 homolog 2                                   |
| maker-5-augustus-gene-177.79-mRNA-1 | NA | NA       |           | 0            | OsR498G0510638400.01.T05 | DNA primase small subunit                                                  |
| maker-5-augustus-gene-177.84-mRNA-1 | NA | NA       | TIR       | Os05g0358500 | OsR498G0510639400.01.T04 | PPM-type phosphatase domain-containing protein                             |
| maker-5-augustus-gene-179.35-mRNA-1 | NA | NA       |           | Os05g0361200 | OsR498G0510654700.01.T05 | Ferrochelatase                                                             |
| maker-5-augustus-gene-180.38-mRNA-1 | NA | NA       |           | Os05g0361700 | OsR498G0510657700.01.T01 | EREBP transcription factor                                                 |
| maker-5-augustus-gene-185.0-mRNA-1  | NA | Indica   |           | Os05g0366600 | OsR498G0510678900.01.T01 | Non-cyanogenic beta-glucosidase                                            |
| maker-5-augustus-gene-185.12-mRNA-1 | NA | NA       |           | Os05g0367400 | OsR498G0510680800.01.T01 | Thiamine pyrophosphokinase                                                 |
| maker-5-augustus-gene-185.15-mRNA-1 | NA | NA       |           | Os05g0367800 | OsR498G0510681800.01.T01 | Luminal-binding protein 3-like                                             |
| maker-5-augustus-gene-185.2-mRNA-1  | NA | NA       |           | 0            | OsR498G0510682500.01.T01 |                                                                            |
| maker-5-augustus-gene-185.4-mRNA-1  | NA | NA       |           | Os05g0366900 | OsR498G0510679400.01.T03 |                                                                            |
| maker-5-augustus-gene-185.7-mRNA-1  | NA | NA       |           | Os05g0367100 | OsR498G0510680000.01.T01 | Nucleolar protein 16                                                       |
| maker-5-augustus-gene-185.9-mRNA-1  | NA | Indica   |           | Os05g0367200 | OsR498G0510680400.01.T01 |                                                                            |
| maker-5-augustus-gene-186.0-mRNA-1  | NA | NA       |           | Os05g0368300 | OsR498G0510685100.01.T01 | S4 RNA-binding domain-containing protein (Fragment)                        |
| maker-5-augustus-gene-186.3-mRNA-1  | NA | NA       |           | Os05g0368600 | OsR498G0510686600.01.T01 | HMA domain-containing protein                                              |
| maker-5-augustus-gene-186.5-mRNA-1  | NA | Indica   | CC-NBS-TM | Os10g0568600 | OsR498G0510687800.01.T01 | Putative stripe rust resistance protein Yr10                               |
| maker-5-augustus-gene-187.0-mRNA-1  | NA | NA       |           | Os05g0369900 |                          | Exocyst subunit Exo70 family protein (Fragment)                            |
| maker-5-augustus-gene-19.2-mRNA-1   | NA | NA       |           | Os08g0448900 |                          | ATP-dependent DNA helicase                                                 |
| maker-5-augustus-gene-191.44-mRNA-1 | NA | NA       |           | Os05g0375600 | OsR498G0510713900.01.T01 | PCRF domain-containing protein (Fragment)                                  |
| maker-5-augustus-gene-191.64-mRNA-1 | NA | NA       |           | Os05g0376600 | OsR498G0510716400.01.T01 | Mediator of DNA damage checkpoint protein 1                                |
| maker-5-augustus-gene-191.72-mRNA-1 | NA | NA       |           | Os05g0376800 | OsR498G0510716800.01.T01 | Gibberellin induced protein (Fragment)                                     |
| maker-5-augustus-gene-192.6-mRNA-1  | NA | NA       |           | Os05g0378900 | OsR498G0510725200.01.T01 | Conserved oligomeric Golgi complex subunit 5                               |
| maker-5-augustus-gene-193.0-mRNA-1  | NA | NA       | NBS-TM    | Os05g0379500 | OsR498G0510726700.01.T05 | Powdery mildew resistance protein PM3 variant                              |
| maker-5-augustus-gene-193.3-mRNA-1  | NA | NA       | NBS-TM    | Os05g0380300 | OsR498G0510726700.01.T05 | Powdery mildew resistance protein PM3 variant                              |
| maker-5-augustus-gene-193.5-mRNA-1  | NA | NA       |           | 0            | OsR498G0510234300.01.T01 | GRF zinc finger family protein, expressed                                  |
| maker-5-augustus-gene-194.0-mRNA-1  | NA | Indica   |           | Os05g0381500 | OsR498G0510734900.01.T02 | Atherin                                                                    |
| maker-5-augustus-gene-194.10-mRNA-1 | NA | Indica   |           | Os05g0382200 | OsR498G0510738600.01.T01 | Cation/H <sup>+</sup> antiporter 20                                        |
| maker-5-augustus-gene-194.5-mRNA-1  | NA | NA       |           |              |                          | probable ADP-ribosylation factor GTPase-activating protein AGD11           |
| maker-5-augustus-gene-2.0-mRNA-1    | NA | NA       |           |              |                          | RING-type E3 ubiquitin transferase                                         |
| maker-5-augustus-gene-2.11-mRNA-1   | NA | NA       |           | 0            | OsR498G0509566100.01.T01 | Formin-like protein 14                                                     |
| maker-5-augustus-gene-2.13-mRNA-1   | NA | NA       | LRR-TM    | Os05g0104100 | OsR498G0509566500.01.T01 | Vacuolar sorting protein 39/Transforming growth factor beta receptor-asso  |
| maker-5-augustus-gene-2.18-mRNA-1   | NA | NA       |           | Os05g0102800 | OsR498G0509563400.01.T06 | Putative RNA recognition motif 2, nucleotide-binding alpha-beta plait doma |
| maker-5-augustus-gene-2.3-mRNA-1    | NA | Indica   |           | Os05g0102900 | OsR498G0509563700.01.T02 | Vacuolar protein sorting-associated protein 32 like 2                      |
| maker-5-augustus-gene-2.30-mRNA-1   | NA | NA       |           | Os05g0103000 | OsR498G0509564000.01.T04 | BHLH transcription factor Upa20                                            |
| maker-5-augustus-gene-2.35-mRNA-1   | NA | Japonica |           | Os05g0103100 | OsR498G0509564200.01.T02 | Translocon-associated protein subunit beta like                            |
| maker-5-augustus-gene-2.38-mRNA-1   | NA | NA       |           | Os05g0103600 | OsR498G0509565600.01.T01 | ankyrin repeat and death domain-containing protein 1B isoform X1           |
| maker-5-augustus-gene-2.42-mRNA-1   | NA | Indica   |           | Os05g0103700 | OsR498G0100040000.01.T01 |                                                                            |
| maker-5-augustus-gene-2.50-mRNA-1   | NA | Japonica |           | Os05g0103800 | OsR498G0509566000.01.T01 | Cytochrome c oxidase assembly factor like                                  |
| maker-5-augustus-gene-20.13-mRNA-1  | NA | NA       |           | Os05g0135200 | OsR498G0509685100.01.T01 | Peroxidase                                                                 |
| maker-5-augustus-gene-20.15-mRNA-1  | NA | Indica   |           | Os01g0327100 | OsR498G0509686100.01.T01 | Peroxidase                                                                 |
| maker-5-augustus-gene-20.17-mRNA-1  | NA | NA       |           | Os05g0135500 | OsR498G0509686700.01.T01 | Peroxidase                                                                 |
| maker-5-augustus-gene-20.28-mRNA-1  | NA | Japonica | Kinase-TM | Os05g0135100 | OsR498G0509684800.01.T02 | Wall-associated receptor kinase 3                                          |
| maker-5-augustus-gene-20.5-mRNA-1   | NA | Indica   |           | Os05g0134400 | OsR498G0509681700.01.T01 | Peroxidase                                                                 |
| maker-5-augustus-gene-204.16-mRNA-1 | NA | NA       |           | 0            | OsR498G0510795500.01.T07 | 1-(5-phosphoribosyl)-5-[(5-phosphoribosylamino)methylideneamino] imidaz    |
| maker-5-augustus-gene-204.20-mRNA-1 | NA | NA       |           | 0            | OsR498G0510795700.01.T01 | Gdsl esterasellipase                                                       |
| maker-5-augustus-gene-205.0-mRNA-1  | NA | NA       |           |              |                          | Putative alpha-ketoglutarate-dependent dioxygenase ABH5 (Fragment)         |
| maker-5-augustus-gene-207.0-mRNA-1  | NA | NA       |           | Os06g0100266 | OsR498G0409500700.01.T03 | zf-LSD1 domain-containing protein                                          |
| maker-5-augustus-gene-208.6-mRNA-1  | NA | Indica   |           | Os05g0406000 | OsR498G0510810100.01.T01 | Receptor-like cytosolic serine/threonine-protein kinase RBK2               |
| maker-5-augustus-gene-209.2-mRNA-1  | NA | NA       |           | Os05g0406100 | OsR498G0510810400.01.T03 | Putative inosine-uridine preferring nucleoside hydrolase                   |
| maker-5-augustus-gene-209.8-mRNA-1  | NA | NA       |           | Os05g0406200 | OsR498G0510811600.01.T01 | Inosine/uridine-preferring nucleoside hydrolase                            |
| maker-5-augustus-gene-21.35-mRNA-1  | NA | NA       |           | Os05g0136900 | OsR498G0509694300.01.T01 | Acyl transferase 4                                                         |
| maker-5-augustus-gene-21.37-mRNA-1  | NA | NA       |           | 0            | OsR498G0509696100.01.T03 | ABC transporter B family member 4                                          |
| maker-5-augustus-gene-21.44-mRNA-1  | NA | NA       |           | Os05g0137300 | OsR498G0509696300.01.T01 | Soluble diacylglycerol acyltransferase                                     |
| maker-5-augustus-gene-21.46-mRNA-1  | NA | NA       |           | Os05g0137400 |                          | Retrotransposon protein SINE subclass                                      |
| maker-5-augustus-gene-21.55-mRNA-1  | NA | NA       |           | 0            | OsR498G0509696800.01.T01 | WRKY transcription factor 5                                                |

|                                     |    |          |               |              |                          |                                                                 |
|-------------------------------------|----|----------|---------------|--------------|--------------------------|-----------------------------------------------------------------|
| maker-5-augustus-gene-212.34-mRNA-1 | NA | Indica   |               | Os05g0410900 | OsR498G0510828700.01.T01 | Putative proton-dependent oligopeptide transporter (POT)        |
| maker-5-augustus-gene-212.42-mRNA-1 | NA | Indica   |               | Os05g0411200 | OsR498G0510829000.01.T03 | Putative endonuclease or glycosyl hydrolase                     |
| maker-5-augustus-gene-212.53-mRNA-1 | NA | NA       |               |              |                          |                                                                 |
| maker-5-augustus-gene-214.30-mRNA-1 | NA | NA       |               | 0            | OsR498G0510844100.01.T01 | Glutathione gamma-glutamylcysteinyltransferase                  |
| maker-5-augustus-gene-214.43-mRNA-1 | NA | NA       |               | Os05g0415400 | OsR498G0510844400.01.T01 | Secondary wall NAC master switch                                |
| maker-5-augustus-gene-215.30-mRNA-1 | NA | NA       |               | Os05g0417100 | OsR498G0510849900.01.T01 | Serine protease                                                 |
| maker-5-augustus-gene-216.28-mRNA-1 | NA | NA       |               | Os05g0418000 | OsR498G0510853700.01.T01 | Guanosine nucleotide diphosphate dissociation inhibitor         |
| maker-5-augustus-gene-216.35-mRNA-1 | NA | NA       |               | Os05g0419100 | OsR498G0510857700.01.T01 | PHD finger protein ALFIN-LIKE 5                                 |
| maker-5-augustus-gene-216.40-mRNA-1 | NA | Indica   |               | Os05g0418100 | OsR498G0510854000.01.T02 |                                                                 |
| maker-5-augustus-gene-216.46-mRNA-1 | NA | NA       |               | Os05g0418800 | OsR498G0510856200.01.T01 | NAC transcription factor                                        |
| maker-5-augustus-gene-216.48-mRNA-1 | NA | NA       |               | Os05g0419000 | OsR498G0510857400.01.T01 | Pheophytinase, chloroplastic                                    |
| maker-5-augustus-gene-216.51-mRNA-1 | NA | Indica   |               | Os05g0419200 | OsR498G0510858000.01.T01 | Protein root UVB sensitive 6                                    |
| maker-5-augustus-gene-216.56-mRNA-1 | NA | NA       |               | Os05g0419500 | OsR498G0510859800.01.T02 | RNA-binding KH domain-containing protein isoform 1              |
| maker-5-augustus-gene-217.14-mRNA-1 | NA | NA       |               | 0            | OsR498G0510865100.01.T01 | Zinc ion binding                                                |
| maker-5-augustus-gene-22.2-mRNA-1   | NA | NA       |               |              |                          |                                                                 |
| maker-5-augustus-gene-22.4-mRNA-1   | NA | Indica   |               | Os05g0139100 | OsR498G0509702300.01.T01 | Phytochrome interacting factor 3                                |
| maker-5-augustus-gene-222.39-mRNA-1 | NA | Indica   |               | Os05g0430200 | OsR498G0510897900.01.T01 | dNK domain-containing protein (Fragment)                        |
| maker-5-augustus-gene-222.42-mRNA-1 | NA | NA       |               |              |                          | DUF668 domain-containing protein                                |
| maker-5-augustus-gene-222.48-mRNA-1 | NA | NA       |               | Os05g0431001 |                          | GLTSCR1 domain-containing protein                               |
| maker-5-augustus-gene-222.51-mRNA-1 | NA | NA       |               | Os05g0429900 | OsR498G0510897600.01.T01 | Transcription repressor MYB4                                    |
| maker-5-augustus-gene-222.53-mRNA-1 | NA | NA       |               | Os05g0430400 | OsR498G0510898600.01.T01 | DAR GTPase 3, chloroplastic                                     |
| maker-5-augustus-gene-222.58-mRNA-1 | NA | NA       |               | Os05g0430700 | OsR498G0510898800.01.T01 | Probable magnesium transporter                                  |
| maker-5-augustus-gene-222.63-mRNA-1 | NA | NA       |               | Os05g0430900 | OsR498G0510899400.01.T01 | Peptide transporter PTR1                                        |
| maker-5-augustus-gene-222.65-mRNA-1 | NA | NA       |               | 0            | OsR498G0510901600.01.T02 |                                                                 |
| maker-5-augustus-gene-223.48-mRNA-1 | NA | NA       |               | Os05g0432200 | OsR498G0510902100.01.T01 | Gibberellin-regulated protein 3-like                            |
| maker-5-augustus-gene-223.50-mRNA-1 | NA | NA       |               | Os05g0432400 | OsR498G0510902300.01.T06 | Transmembrane protein 18                                        |
| maker-5-augustus-gene-223.53-mRNA-1 | NA | NA       |               | Os05g0432500 | OsR498G0510902500.01.T01 | Transmembrane protein 18                                        |
| maker-5-augustus-gene-223.56-mRNA-1 | NA | NA       |               | Os05g0433400 | OsR498G0510904500.01.T01 | Putative DNA-directed RNA polymerase subunit beta-like          |
| maker-5-augustus-gene-223.57-mRNA-1 | NA | Indica   |               | Os05g0433100 | OsR498G0510905100.01.T01 |                                                                 |
| maker-5-augustus-gene-223.58-mRNA-1 | NA | NA       |               | Os05g0433100 | OsR498G0510905700.01.T01 |                                                                 |
| maker-5-augustus-gene-223.68-mRNA-1 | NA | Indica   |               | Os05g0431700 | OsR498G0510901800.01.T04 | Proton-dependent oligopeptide transporter                       |
| maker-5-augustus-gene-223.69-mRNA-1 | NA | NA       |               | Os05g0432600 | OsR498G0510902800.01.T01 | Embryogenesis-associated protein EMB8-like                      |
| maker-5-augustus-gene-223.74-mRNA-1 | NA | Indica   |               | Os05g0432700 | OsR498G0510903000.01.T01 | Inhibitor I9 domain-containing protein                          |
| maker-5-augustus-gene-224.45-mRNA-1 | NA | Indica   |               | Os05g0434200 | OsR498G0510909100.01.T01 |                                                                 |
| maker-5-augustus-gene-224.49-mRNA-1 | NA | NA       |               | Os05g0435100 |                          |                                                                 |
| maker-5-augustus-gene-224.52-mRNA-1 | NA | Japonica |               | Os05g0435300 | OsR498G0510910900.01.T01 |                                                                 |
| maker-5-augustus-gene-224.54-mRNA-1 | NA | NA       |               | Os05g0435700 | OsR498G0510912100.01.T01 | (3R)-hydroxymyristoyl-[acyl-carrier-protein] dehydratase        |
| maker-5-augustus-gene-224.57-mRNA-1 | NA | NA       | Kinase-TM     | Os05g0436100 | OsR498G0510914400.01.T01 | probable serine/threonine-protein kinase At1g01540              |
| maker-5-augustus-gene-225.52-mRNA-1 | NA | NA       |               | Os05g0436900 | OsR498G0510915900.01.T01 | S-acyltransferase                                               |
| maker-5-augustus-gene-225.56-mRNA-1 | NA | NA       |               | Os05g0437200 | OsR498G0510917500.01.T03 | Membrane protein COV-like                                       |
| maker-5-augustus-gene-225.61-mRNA-1 | NA | Indica   |               | Os05g0437700 | OsR498G0510918900.01.T02 | G-box-binding factor 4                                          |
| maker-5-augustus-gene-225.64-mRNA-1 | NA | NA       |               | Os05g0437300 | OsR498G0510917800.01.T04 | Polypyrimidine tract-binding protein 2                          |
| maker-5-augustus-gene-225.71-mRNA-1 | NA | NA       |               | Os05g0437500 | OsR498G0510918800.01.T01 |                                                                 |
| maker-5-augustus-gene-225.73-mRNA-1 | NA | NA       |               | Os05g0437900 | OsR498G0510920600.01.T01 | Tubby-like F-box protein 8                                      |
| maker-5-augustus-gene-226.56-mRNA-1 | NA | NA       |               | Os05g0438500 | OsR498G0510922900.01.T01 | Soluble inorganic pyrophosphatase                               |
| maker-5-augustus-gene-226.59-mRNA-1 | NA | Indica   |               | Os06g0669150 | OsR498G0510924300.01.T02 |                                                                 |
| maker-5-augustus-gene-226.62-mRNA-1 | NA | NA       |               | Os05g0439200 |                          |                                                                 |
| maker-5-augustus-gene-226.63-mRNA-1 | NA | NA       |               | Os09g0120033 | OsR498G0510922000.01.T01 |                                                                 |
| maker-5-augustus-gene-226.65-mRNA-1 | NA | Indica   |               | Os01g0866400 | OsR498G0510923200.01.T01 | D-fructose-1,6-bisphosphate 1-phosphohydrolase                  |
| maker-5-augustus-gene-226.73-mRNA-1 | NA | NA       |               | Os05g0438800 | OsR498G0510924000.01.T03 | Actin                                                           |
| maker-5-augustus-gene-23.30-mRNA-1  | NA | NA       |               | Os05g0140100 | OsR498G0509709100.01.T03 | MYB18 transcription factor                                      |
| maker-5-augustus-gene-230.0-mRNA-1  | NA | NA       |               | Os04g0354200 |                          | MULE domain-containing protein (Fragment)                       |
| maker-5-augustus-gene-230.27-mRNA-1 | NA | NA       |               | Os11g0307600 | OsR498G1119899800.01.T01 | Protein kinase domain-containing protein                        |
| maker-5-augustus-gene-242.0-mRNA-1  | NA | NA       |               | Os05g0471800 |                          | Far-red impaired response protein-like                          |
| maker-5-augustus-gene-242.11-mRNA-1 | NA | NA       |               | Os02g0517900 | OsR498G0203939000.01.T03 |                                                                 |
| maker-5-augustus-gene-243.54-mRNA-1 | NA | NA       |               | Os05g0472700 | OsR498G0511026900.01.T01 | Metal ion transporter ZIP8                                      |
| maker-5-augustus-gene-246.42-mRNA-1 | NA | NA       |               | Os06g0607300 |                          | Transposable element protein, putative                          |
| maker-5-augustus-gene-246.46-mRNA-1 | NA | NA       |               | 0            | OsR498G0203341500.01.T01 |                                                                 |
| maker-5-augustus-gene-247.0-mRNA-1  | NA | NA       | Kinase-TM     | 0            | OsR498G0511051300.01.T01 | Serine/threonine-protein kinase STN8 chloroplastic              |
| maker-5-augustus-gene-247.14-mRNA-1 | NA | NA       | Kinase-LRR-TM | Os05g0481100 | OsR498G0511055300.01.T09 | Putative LRR receptor-like serine/threonine-protein kinase-like |
| maker-5-augustus-gene-247.22-mRNA-1 | NA | NA       |               | Os05g0481600 | OsR498G0511057300.01.T02 | NADH dehydrogenase [ubiquinone] 1 alpha subcomplex subunit 1    |

|                                     |    |          |               |              |                          |                                                                      |
|-------------------------------------|----|----------|---------------|--------------|--------------------------|----------------------------------------------------------------------|
| maker-5-augustus-gene-247.27-mRNA-1 | NA | NA       |               | Os05g0480200 | OsR498G0511051600.01.T02 | Thioredoxin h-type                                                   |
| maker-5-augustus-gene-247.29-mRNA-1 | NA | NA       | Kinase-LRR-TM | Os05g0480400 | OsR498G0511051800.01.T01 | Putative inactive receptor kinase                                    |
| maker-5-augustus-gene-247.3-mRNA-1  | NA | NA       |               | Os05g0480700 | OsR498G0511053100.01.T01 | Vacuolar ATP synthase subunit E                                      |
| maker-5-augustus-gene-247.31-mRNA-1 | NA | NA       |               | Os05g0480600 | OsR498G0511052800.01.T02 | Proline-rich family protein                                          |
| maker-5-augustus-gene-247.33-mRNA-1 | NA | NA       |               | Os05g0481400 | OsR498G0511055600.01.T01 | TF-B3 domain-containing protein                                      |
| maker-5-augustus-gene-247.44-mRNA-1 | NA | NA       |               | 0            | OsR498G0511057600.01.T01 | Heat-inducible transcription repressor                               |
| maker-5-augustus-gene-247.5-mRNA-1  | NA | NA       |               | Os05g0480800 | OsR498G0511053500.01.T01 |                                                                      |
| maker-5-augustus-gene-247.7-mRNA-1  | NA | Indica   |               | Os05g0480800 | OsR498G0511054300.01.T01 | N-acetyltransferase domain-containing protein                        |
| maker-5-augustus-gene-247.9-mRNA-1  | NA | NA       |               | Os05g0481000 | OsR498G0511054500.01.T01 | Acetyltransferase NSI                                                |
| maker-5-augustus-gene-248.59-mRNA-1 | NA | NA       |               | Os05g0482700 | OsR498G0511061800.01.T03 | 2,3-bisphosphoglycerate-independent phosphoglycerate mutase          |
| maker-5-augustus-gene-249.7-mRNA-1  | NA | NA       |               | Os05g0484800 | OsR498G0511068200.01.T01 | Epstein-Barr virus EBNA-1-like                                       |
| maker-5-augustus-gene-249.8-mRNA-1  | NA | NA       |               | 0            | OsR498G0511070800.01.T01 | Far-red impaired response protein-like                               |
| maker-5-augustus-gene-25.50-mRNA-1  | NA | NA       |               | Os05g0144400 | OsR498G0509723500.01.T01 | Serine/threonine-protein phosphatase                                 |
| maker-5-augustus-gene-25.55-mRNA-1  | NA | Indica   |               | Os02g0143100 | OsR498G0509724700.01.T06 | Sucrose-phosphate phosphatase                                        |
| maker-5-augustus-gene-25.80-mRNA-1  | NA | NA       |               | Os05g0144800 | OsR498G0509724600.01.T02 | General transcription and DNA repair factor IIH helicase subunit XPD |
| maker-5-augustus-gene-250.6-mRNA-1  | NA | NA       | Kinase-LRR-TM | Os05g0486100 | OsR498G0511075400.01.T01 | Putative leucine-rich repeat receptor-like protein kinase            |
| maker-5-augustus-gene-251.22-mRNA-1 | NA | NA       |               | Os03g0648250 | OsR498G0409474500.01.T01 | GRF-type domain-containing protein                                   |
| maker-5-augustus-gene-258.28-mRNA-1 | NA | NA       |               | Os05g0503000 | OsR498G0511123000.01.T01 | Secretory carrier-associated membrane protein 3                      |
| maker-5-augustus-gene-26.10-mRNA-1  | NA | NA       |               | Os05g0145700 | OsR498G0509726600.01.T04 | PDZ domain-containing protein                                        |
| maker-5-augustus-gene-26.14-mRNA-1  | NA | NA       |               | Os05g0146100 | OsR498G0509727800.01.T02 | PDZ domain-containing protein                                        |
| maker-5-augustus-gene-26.2-mRNA-1   | NA | NA       |               | Os05g0145400 | OsR498G0509726000.01.T02 | Fibronectin type-III domain-containing protein (Fragment)            |
| maker-5-augustus-gene-26.4-mRNA-1   | NA | NA       |               | Os05g0145600 | OsR498G0509726400.01.T04 | Pentatricopeptide repeat-containing protein mitochondrial            |
| maker-5-augustus-gene-263.59-mRNA-1 | NA | NA       |               | 0            | OsR498G0102010300.01.T01 | Protein kinase domain-containing protein                             |
| maker-5-augustus-gene-266.16-mRNA-1 | NA | Indica   |               | Os05g0514400 | OsR498G0511176800.01.T01 |                                                                      |
| maker-5-augustus-gene-27.54-mRNA-1  | NA | NA       |               | Os05g0148700 | OsR498G0509736700.01.T01 | Senescence-associated family protein                                 |
| maker-5-augustus-gene-27.63-mRNA-1  | NA | NA       |               | Os05g0147100 | OsR498G0509732400.01.T02 | BRCT domain-containing protein                                       |
| maker-5-augustus-gene-27.77-mRNA-1  | NA | Japonica |               | Os05g0148200 | OsR498G0509735400.01.T04 |                                                                      |
| maker-5-augustus-gene-27.80-mRNA-1  | NA | NA       |               | Os05g0148500 |                          | Coiled-coil domain-containing protein SCD2                           |
| maker-5-augustus-gene-27.85-mRNA-1  | NA | NA       |               | Os05g0148600 | OsR498G0509736600.01.T01 | Sodium-hydrogen exchanger 3                                          |
| maker-5-augustus-gene-271.9-mRNA-1  | NA | NA       |               | Os05g0523100 |                          |                                                                      |
| maker-5-augustus-gene-273.18-mRNA-1 | NA | NA       |               | 0            | OsR498G0511222600.01.T01 | Glandular trichome-specific WRKY 1                                   |
| maker-5-augustus-gene-273.20-mRNA-1 | NA | NA       |               | 0            | OsR498G0511223000.01.T01 | Flavin-containing monooxygenase                                      |
| maker-5-augustus-gene-274.0-mRNA-1  | NA | NA       |               | Os05g0528900 | OsR498G0511224500.01.T01 | Ribosomal protein L9                                                 |
| maker-5-augustus-gene-274.10-mRNA-1 | NA | NA       |               | Os05g0530400 | OsR498G0511231300.01.T01 | Spotted leaf 7 (Fragment)                                            |
| maker-5-augustus-gene-274.12-mRNA-1 | NA | NA       |               |              |                          |                                                                      |
| maker-5-augustus-gene-274.13-mRNA-1 | NA | NA       |               | Os05g0531200 | OsR498G0511234900.01.T01 | Non-classical arabinogalactan protein 31                             |
| maker-5-augustus-gene-274.15-mRNA-1 | NA | NA       |               | Os05g0529000 | OsR498G0511224800.01.T01 | CONTINUOUS VASCULAR RING                                             |
| maker-5-augustus-gene-274.19-mRNA-1 | NA | NA       |               | Os05g0529200 | OsR498G0511225400.01.T02 | Enoyl-CoA delta isomerase 1, peroxisomal like                        |
| maker-5-augustus-gene-274.20-mRNA-1 | NA | NA       |               | Os05g0529300 | OsR498G0511225600.01.T01 | ER lumen protein-retaining receptor A                                |
| maker-5-augustus-gene-274.24-mRNA-1 | NA | NA       |               | Os05g0529700 | OsR498G0511228200.01.T06 | J domain-containing protein                                          |
| maker-5-augustus-gene-274.29-mRNA-1 | NA | NA       |               | Os05g0529900 | OsR498G0511229400.01.T01 | ALA-interacting subunit                                              |
| maker-5-augustus-gene-274.32-mRNA-1 | NA | Indica   |               | Os01g0729900 | OsR498G0511230600.01.T03 |                                                                      |
| maker-5-augustus-gene-274.36-mRNA-1 | NA | NA       | Kinase-TM     | Os05g0530500 | OsR498G0511231600.01.T04 | Non-specific serine/threonine protein kinase                         |
| maker-5-augustus-gene-274.4-mRNA-1  | NA | NA       |               | Os05g0529400 | OsR498G0511225700.01.T01 | UBD domain-containing protein (Fragment)                             |
| maker-5-augustus-gene-274.7-mRNA-1  | NA | Japonica |               | Os05g0529600 | OsR498G0511227100.01.T01 | DNA polymerase III subunit gamma/tau                                 |
| maker-5-augustus-gene-275.44-mRNA-1 | NA | Indica   |               | Os05g0531400 | OsR498G0511235500.01.T02 | Non-classical arabinogalactan protein 31                             |
| maker-5-augustus-gene-275.46-mRNA-1 | NA | NA       |               | Os05g0531500 | OsR498G0511236100.01.T02 | Inner membrane protein oxaA                                          |
| maker-5-augustus-gene-275.53-mRNA-1 | NA | Indica   |               | Os05g0533100 | OsR498G0511241500.01.T01 | RGF repeats nuclear RNA binding protein A                            |
| maker-5-augustus-gene-275.59-mRNA-1 | NA | Indica   |               | Os05g0535200 | OsR498G0511239000.01.T01 | FBD domain-containing protein                                        |
| maker-5-augustus-gene-275.64-mRNA-1 | NA | Indica   |               | Os01g0722700 | OsR498G0511239800.01.T01 | Phosphotransferase                                                   |
| maker-5-augustus-gene-276.0-mRNA-1  | NA | Indica   |               | Os05g0533600 | OsR498G0511243300.01.T02 | Starch synthase, chloroplastic/amyloplastic                          |
| maker-5-augustus-gene-276.14-mRNA-1 | NA | Indica   |               | Os05g0534100 | OsR498G0511244300.01.T01 | Putative membrane protein YuiD isoform A                             |
| maker-5-augustus-gene-276.18-mRNA-1 | NA | NA       |               | Os05g0534400 | OsR498G0511244900.01.T01 | Calcineurin B-like protein 4                                         |
| maker-5-augustus-gene-276.21-mRNA-1 | NA | NA       |               | Os05g0534800 | OsR498G0511245900.01.T03 | probable ADP-ribosylation factor GTPase-activating protein AGD14     |
| maker-5-augustus-gene-276.28-mRNA-1 | NA | NA       |               | Os05g0534500 | OsR498G0511245200.01.T02 | HMA domain-containing protein                                        |
| maker-5-augustus-gene-276.31-mRNA-1 | NA | NA       |               | Os05g0534600 | OsR498G0511245800.01.T03 | Btz domain-containing protein (Fragment)                             |
| maker-5-augustus-gene-276.34-mRNA-1 | NA | NA       |               | Os05g0535100 | OsR498G0511247200.01.T01 | Glucan endo-1,3-beta-D-glucosidase                                   |
| maker-5-augustus-gene-276.5-mRNA-1  | NA | Indica   |               | Os05g0533700 | OsR498G0511243500.01.T01 | NADH dehydrogenase2                                                  |
| maker-5-augustus-gene-276.7-mRNA-1  | NA | NA       |               | Os05g0533800 | OsR498G0511243700.01.T03 | Hydrogen-transporting ATP synthase, rotational mechanism             |
| maker-5-augustus-gene-276.9-mRNA-1  | NA | Indica   |               | Os05g0533900 | OsR498G0511243900.01.T01 | ATP-dependent Clp protease ATP-binding subunit ClpX                  |
| maker-5-augustus-gene-277.31-mRNA-1 | NA | NA       |               | 0            | OsR498G0511247300.01.T01 | FBD domain-containing protein                                        |



|                                     |    |          |           |              |                          |                                                                      |
|-------------------------------------|----|----------|-----------|--------------|--------------------------|----------------------------------------------------------------------|
| maker-5-augustus-gene-277.39-mRNA-1 | NA | NA       |           | Os05g0535400 | OsR498G0511247700.01.T03 | Choline/ethanolamine kinase                                          |
| maker-5-augustus-gene-277.50-mRNA-1 | NA | NA       |           | Os05g0535800 | OsR498G0511249100.01.T02 | 30S ribosomal protein S A                                            |
| maker-5-augustus-gene-277.53-mRNA-1 | NA | NA       |           | Os05g0535900 | OsR498G0511249700.01.T01 | Mitochondrial outer membrane porin                                   |
| maker-5-augustus-gene-277.56-mRNA-1 | NA | NA       |           | Os05g0536200 | OsR498G0511250300.01.T01 | Mitochondrial outer membrane protein porin of                        |
| maker-5-augustus-gene-277.60-mRNA-1 | NA | NA       |           | 0            | OsR498G0511251300.01.T02 |                                                                      |
| maker-5-augustus-gene-277.62-mRNA-1 | NA | NA       |           | Os05g0536900 | OsR498G0511252100.01.T03 | Vacuolar biogenesis protein                                          |
| maker-5-augustus-gene-277.67-mRNA-1 | NA | NA       |           | Os05g0535600 | OsR498G0511248400.01.T03 | 'putative inositol-1,4,5-trisphosphate phosphatase'                  |
| maker-5-augustus-gene-277.74-mRNA-1 | NA | NA       |           | 0            | OsR498G0511248800.01.T01 |                                                                      |
| maker-5-augustus-gene-277.77-mRNA-1 | NA | NA       |           |              |                          | Ethylene-responsive transcription factor WRI1                        |
| maker-5-augustus-gene-277.79-mRNA-1 | NA | NA       |           | 0            | OsR498G0511251000.01.T01 | Aldedh domain-containing protein                                     |
| maker-5-augustus-gene-278.0-mRNA-1  | NA | Indica   |           | Os01g0714800 | OsR498G0511253300.01.T01 | WRKY transcription factor                                            |
| maker-5-augustus-gene-278.16-mRNA-1 | NA | Japonica |           | Os05g0537300 | OsR498G0101879400.01.T03 | Myosin family protein with Dil domain                                |
| maker-5-augustus-gene-278.18-mRNA-1 | NA | NA       |           | Os05g0537400 | OsR498G0511254000.01.T02 | Protein-serine/threonine phosphatase                                 |
| maker-5-augustus-gene-278.2-mRNA-1  | NA | NA       |           | 0            | OsR498G0511253700.01.T04 | Myosin-J heavy chain                                                 |
| maker-5-augustus-gene-278.21-mRNA-1 | NA | Indica   |           | Os09g0499600 | OsR498G0511257000.01.T01 | BED-type domain-containing protein                                   |
| maker-5-augustus-gene-278.23-mRNA-1 | NA | Indica   |           | Os09g0500100 | OsR498G0511257600.01.T01 | FBD domain-containing protein                                        |
| maker-5-augustus-gene-278.27-mRNA-1 | NA | NA       |           | 0            | OsR498G0511258000.01.T01 | Pathogenesis-related protein 5                                       |
| maker-5-augustus-gene-278.29-mRNA-1 | NA | Japonica |           | Os05g0538900 | OsR498G0917754400.01.T03 | NADH dehydrogenase [ubiquinone] 1 alpha subcomplex subunit 12        |
| maker-5-augustus-gene-279.42-mRNA-1 | NA | NA       |           | Os05g0539500 | OsR498G0511263100.01.T01 | Alpha/beta-Hydrolases superfamily protein                            |
| maker-5-augustus-gene-279.47-mRNA-1 | NA | NA       |           | 0            | OsR498G0511263500.01.T01 | probable ADP,ATP carrier protein At5g56450                           |
| maker-5-augustus-gene-279.49-mRNA-1 | NA | Indica   |           | Os05g0539900 | OsR498G0511264700.01.T04 | Protein conserved in the green lineage and diatoms 27, chloroplastic |
| maker-5-augustus-gene-279.53-mRNA-1 | NA | NA       |           | Os05g0540000 | OsR498G0511263100.01.T01 | Glycosyltransferase family protein 64 protein C5                     |
| maker-5-augustus-gene-279.56-mRNA-1 | NA | NA       |           | Os05g0540200 | OsR498G0511265300.01.T01 | Prenylated rab acceptor PRA1                                         |
| maker-5-augustus-gene-279.58-mRNA-1 | NA | NA       |           | Os05g0540800 | OsR498G0511266300.01.T07 | SANT domain-containing protein (Fragment)                            |
| maker-5-augustus-gene-279.66-mRNA-1 | NA | NA       |           | Os05g0541100 | OsR498G0511267100.01.T01 | IQ-domain 6                                                          |
| maker-5-augustus-gene-279.69-mRNA-1 | NA | NA       |           | Os05g0541200 | OsR498G0511267500.01.T02 | Cytokinin riboside 5'-monophosphate phosphoribohydrolase             |
| maker-5-augustus-gene-279.74-mRNA-1 | NA | NA       |           | Os05g0539400 | OsR498G0511263000.01.T04 | Beta-galactosidase                                                   |
| maker-5-augustus-gene-279.87-mRNA-1 | NA | NA       |           | Os05g0539800 | OsR498G0511264400.01.T04 | Reversion-to-ethylene sensitivity1 like3                             |
| maker-5-augustus-gene-279.89-mRNA-1 | NA | NA       |           | 0            | OsR498G0511264400.01.T07 |                                                                      |
| maker-5-augustus-gene-279.98-mRNA-1 | NA | NA       |           | Os05g0540300 | OsR498G0511265600.01.T01 | Chaperonin GroEL                                                     |
| maker-5-augustus-gene-28.31-mRNA-1  | NA | NA       |           | Os05g0149400 | OsR498G0509738700.01.T01 | 1-aminocyclopropane-1-carboxylic acid oxidase                        |
| maker-5-augustus-gene-280.15-mRNA-1 | NA | NA       |           | Os05g0542900 | OsR498G0511272500.01.T01 | Polygalacturonase, putative, expressed                               |
| maker-5-augustus-gene-280.19-mRNA-1 | NA | NA       |           | Os05g0543000 | OsR498G0511272700.01.T01 | PMEI domain-containing protein                                       |
| maker-5-augustus-gene-280.21-mRNA-1 | NA | NA       |           | Os05g0543300 | OsR498G0511273300.01.T01 | Protein ANTHESIS POMOTING FACTOR 1 isoform A                         |
| maker-5-augustus-gene-280.29-mRNA-1 | NA | NA       |           | Os05g0542200 | OsR498G0511270800.01.T05 | AB hydrolase-1 domain-containing protein                             |
| maker-5-augustus-gene-280.35-mRNA-1 | NA | NA       |           | Os05g0543100 | OsR498G0511273000.01.T01 | MHD domain-containing protein                                        |
| maker-5-augustus-gene-280.40-mRNA-1 | NA | NA       |           | Os05g0543400 | OsR498G0511273600.01.T01 | Farnesyl pyrophosphate synthase mRNA                                 |
| maker-5-augustus-gene-280.6-mRNA-1  | NA | NA       |           | Os05g0542600 | OsR498G0511272100.01.T03 | Lys-63-specific deubiquitinase                                       |
| maker-5-augustus-gene-281.0-mRNA-1  | NA | NA       |           | Os05g0543600 | OsR498G0511275900.01.T01 | Leucine-rich repeat and WD repeat-containing protein 1 (Fragment)    |
| maker-5-augustus-gene-281.14-mRNA-1 | NA | NA       |           | Os05g0543800 | OsR498G0511276400.01.T01 | J domain-containing protein                                          |
| maker-5-augustus-gene-281.2-mRNA-1  | NA | NA       |           | Os05g0545000 | OsR498G0511280900.01.T06 | CRAL-TRIO domain-containing protein                                  |
| maker-5-augustus-gene-281.21-mRNA-1 | NA | Indica   |           | Os01g0700200 | OsR498G0511281600.01.T02 | Brevis radix-like domain-containing protein                          |
| maker-5-augustus-gene-281.24-mRNA-1 | NA | NA       | Kinase-TM | Os05g0545300 | OsR498G0511282400.01.T01 | Mitogen-activated protein kinase kinase kinase YODA                  |
| maker-5-augustus-gene-281.8-mRNA-1  | NA | NA       |           | Os05g0543700 | OsR498G0511276200.01.T01 | J domain-containing protein                                          |
| maker-5-augustus-gene-282.52-mRNA-1 | NA | Indica   |           | Os05g0545500 | OsR498G0511284300.01.T01 | FHA domain-containing protein DDL                                    |
| maker-5-augustus-gene-282.62-mRNA-1 | NA | NA       |           | Os07g0513300 | OsR498G0100612800.01.T01 | PMD domain-containing protein (Fragment)                             |
| maker-5-augustus-gene-283.11-mRNA-1 | NA | NA       |           | 0            | OsR498G0511288600.01.T01 |                                                                      |
| maker-5-augustus-gene-283.12-mRNA-1 | NA | Japonica |           | Os05g0548700 | OsR498G0510529200.01.T01 |                                                                      |
| maker-5-augustus-gene-283.17-mRNA-1 | NA | NA       |           | 0            | OsR498G0511288800.01.T02 | Acid phosphatase/vanadium-dependent haloperoxidase related           |
| maker-5-augustus-gene-283.20-mRNA-1 | NA | Indica   |           | Os01g0695100 | OsR498G0511289000.01.T03 | Phosphoethanolamine N-methyltransferase 3                            |
| maker-5-augustus-gene-283.30-mRNA-1 | NA | NA       |           | Os05g0549000 | OsR498G0511289200.01.T02 | ENTH domain-containing protein                                       |
| maker-5-augustus-gene-283.37-mRNA-1 | NA | NA       | Kinase-TM | Os05g0549100 | OsR498G0511289600.01.T01 | Serine/threonine-protein kinase SNT7                                 |
| maker-5-augustus-gene-283.4-mRNA-1  | NA | NA       |           | 0            | OsR498G0511287900.01.T01 | ABC transporter B family member 9                                    |
| maker-5-augustus-gene-283.6-mRNA-1  | NA | Indica   |           | Os01g0693900 | OsR498G0511291100.01.T01 | Peptidyl-tRNA hydrolase, mitochondrial                               |
| maker-5-augustus-gene-284.25-mRNA-1 | NA | Indica   |           | Os01g0692700 | OsR498G0511293700.01.T02 | Putative E3 ubiquitin-protein ligase HIP1                            |
| maker-5-augustus-gene-284.29-mRNA-1 | NA | NA       | Kinase-TM | 0            | OsR498G0511296500.01.T02 | Wall-associated kinase                                               |
| maker-5-augustus-gene-284.33-mRNA-1 | NA | NA       |           |              |                          | RING finger and CHY zinc finger domain-containing protein 1          |
| maker-5-augustus-gene-284.39-mRNA-1 | NA | NA       |           | Os05g0549900 | OsR498G0511293200.01.T01 | Lipid phosphate phosphatase 2                                        |
| maker-5-augustus-gene-284.42-mRNA-1 | NA | NA       |           | 0            | OsR498G0511294200.01.T01 | Protein PLASTID MOVEMENT IMPAIRED 2                                  |
| maker-5-augustus-gene-284.45-mRNA-1 | NA | Indica   |           | Os01g0691400 | OsR498G0511294600.01.T01 | Reticulon-like protein (Fragment)                                    |
| maker-5-augustus-gene-284.47-mRNA-1 | NA | NA       | Kinase-TM |              |                          | Receptor serine/threonine kinase PR5K-like                           |

|                                     |    |          |           |              |                          |                                                                      |
|-------------------------------------|----|----------|-----------|--------------|--------------------------|----------------------------------------------------------------------|
| maker-5-augustus-gene-284.49-mRNA-1 | NA | Japonica |           | Os05g0551100 | OsR498G0511297800.01.T01 | VARLMGL domain-containing protein                                    |
| maker-5-augustus-gene-285.36-mRNA-1 | NA | NA       |           | Os05g0552400 | OsR498G0511303700.01.T02 | RING-CH-type domain-containing protein (Fragment)                    |
| maker-5-augustus-gene-285.46-mRNA-1 | NA | NA       |           | Os05g0552100 | OsR498G0511303200.01.T01 |                                                                      |
| maker-5-augustus-gene-285.48-mRNA-1 | NA | NA       |           | Os05g0552500 | OsR498G0511305200.01.T03 | Sulphydryl oxidase                                                   |
| maker-5-augustus-gene-285.55-mRNA-1 | NA | NA       |           | Os05g0552900 | OsR498G0511308800.01.T03 | 65-kDa microtubule-associated protein 3                              |
| maker-5-augustus-gene-285.59-mRNA-1 | NA | NA       |           | Os05g0553000 | OsR498G0511309000.01.T01 | ATP synthase subunit beta                                            |
| maker-5-augustus-gene-286.20-mRNA-1 | NA | Indica   |           | Os05g0555100 | OsR498G0511316100.01.T01 | Serine/threonine protein phosphatase 2A regulatory subunit           |
| maker-5-augustus-gene-286.22-mRNA-1 | NA | NA       |           | Os05g0553400 | OsR498G0511310400.01.T01 | Transcription factor RAX3                                            |
| maker-5-augustus-gene-286.24-mRNA-1 | NA | NA       |           | Os05g0555000 |                          |                                                                      |
| maker-5-augustus-gene-286.26-mRNA-1 | NA | NA       |           | Os05g0555000 | OsR498G0511315400.01.T01 |                                                                      |
| maker-5-augustus-gene-286.31-mRNA-1 | NA | NA       |           | Os05g0555300 | OsR498G0511316400.01.T03 | Electron carrier/ electron transporter/ iron ion binding protein     |
| maker-5-augustus-gene-287.35-mRNA-1 | NA | NA       |           | Os05g0556900 | OsR498G0511318900.01.T02 | Ribosomal protein L35A                                               |
| maker-5-augustus-gene-287.38-mRNA-1 | NA | NA       |           | Os05g0556000 | OsR498G0511319100.01.T01 | Oxoglutarate/iron-dependent dioxygenase                              |
| maker-5-augustus-gene-287.42-mRNA-1 | NA | Indica   |           | Os01g0681000 | OsR498G0511319700.01.T01 | Diacylglycerol O-acyltransferase                                     |
| maker-5-augustus-gene-287.46-mRNA-1 | NA | NA       |           | Os05g0556400 | OsR498G0511319900.01.T01 | Cytochrome b561/ferric reductase transmembrane with DOMON related do |
| maker-5-augustus-gene-287.48-mRNA-1 | NA | Japonica |           | Os05g0556500 | OsR498G0511320500.01.T02 | Mediator of RNA polymerase II transcription subunit 1-like           |
| maker-5-augustus-gene-287.52-mRNA-1 | NA | Indica   |           | Os05g0556700 | OsR498G0511321100.01.T02 | T-complex protein 1 subunit beta                                     |
| maker-5-augustus-gene-287.58-mRNA-1 | NA | NA       |           | Os05g0556900 | OsR498G0511321900.01.T04 | Ribosomal protein L35A                                               |
| maker-5-augustus-gene-287.61-mRNA-1 | NA | NA       |           | Os05g0557000 | OsR498G0511322100.01.T03 | Zinc-binding ribosomal protein family protein                        |
| maker-5-augustus-gene-287.65-mRNA-1 | NA | NA       |           | 0            | OsR498G0511323500.01.T03 | ARM repeat superfamily protein (Fragment)                            |
| maker-5-augustus-gene-287.68-mRNA-1 | NA | NA       |           | Os05g0556100 | OsR498G0511319400.01.T01 | Dynamin-related protein 5A                                           |
| maker-5-augustus-gene-287.75-mRNA-1 | NA | NA       |           | Os05g0557100 |                          | Peptidase A1 domain-containing protein (Fragment)                    |
| maker-5-augustus-gene-287.77-mRNA-1 | NA | NA       |           | Os05g0557400 | OsR498G0511324000.01.T01 | MACPF domain-containing protein NSL1                                 |
| maker-5-augustus-gene-288.37-mRNA-1 | NA | NA       |           | 0            | OsR498G0714810500.01.T02 | Cytochrome f                                                         |
| maker-5-augustus-gene-288.38-mRNA-1 | NA | NA       |           | Os05g0558400 | OsR498G0511327300.01.T04 | Branched-chain-amino-acid aminotransferase                           |
| maker-5-augustus-gene-288.39-mRNA-1 | NA | NA       |           | 0            | OsR498G0714810500.01.T02 | Cytochrome f                                                         |
| maker-5-augustus-gene-288.67-mRNA-1 | NA | NA       |           | Os05g0558800 | OsR498G0511328900.01.T02 | EAR domain-containing protein                                        |
| maker-5-augustus-gene-288.69-mRNA-1 | NA | NA       |           | Os05g0558900 | OsR498G0511329100.01.T01 | Phenylalanine--tRNA ligase beta subunit cytoplasmic                  |
| maker-5-augustus-gene-288.74-mRNA-1 | NA | NA       |           | Os05g0557600 | OsR498G0511324400.01.T01 | Ubiquitin-conjugating enzyme                                         |
| maker-5-augustus-gene-289.36-mRNA-1 | NA | NA       |           | Os05g0560400 | OsR498G0511334500.01.T03 | Tubby-like F-box protein 1                                           |
| maker-5-augustus-gene-289.40-mRNA-1 | NA | NA       |           | Os05g0559300 |                          | Elongation factor Ts isoform 1                                       |
| maker-5-augustus-gene-289.46-mRNA-1 | NA | NA       |           | Os05g0559400 | OsR498G0511331000.01.T04 | Auxin-responsive protein IAA5                                        |
| maker-5-augustus-gene-289.50-mRNA-1 | NA | NA       |           | Os05g0559900 | OsR498G0511332400.01.T05 | Golgin candidate 5                                                   |
| maker-5-augustus-gene-289.56-mRNA-1 | NA | NA       |           | Os05g0560100 | OsR498G0511333400.01.T01 | PRONE domain                                                         |
| maker-5-augustus-gene-289.59-mRNA-1 | NA | NA       | Kinase-TM | Os05g0560300 | OsR498G0511334000.01.T02 | Protein MALE DISCOVERER 1                                            |
| maker-5-augustus-gene-289.62-mRNA-1 | NA | NA       |           | Os05g0560500 |                          |                                                                      |
| maker-5-augustus-gene-294.76-mRNA-1 | NA | NA       |           | 0            | OsR498G0511370300.01.T01 | CTP synthase (glutamine hydrolyzing)                                 |
| maker-5-augustus-gene-295.0-mRNA-1  | NA | Japonica |           | Os05g0569900 | OsR498G0204379800.01.T04 | B-block binding subunit of TFIIC                                     |
| maker-5-augustus-gene-295.2-mRNA-1  | NA | NA       |           |              |                          | B-block binding subunit of TFIIC                                     |
| maker-5-augustus-gene-295.6-mRNA-1  | NA | Indica   |           | Os05g0573300 | OsR498G0511370300.01.T01 | CTP synthase                                                         |
| maker-5-augustus-gene-295.9-mRNA-1  | NA | NA       |           | Os05g0569800 | OsR498G0511368600.01.T02 | THO complex subunit 7                                                |
| maker-5-augustus-gene-296.37-mRNA-1 | NA | NA       |           | Os05g0573200 | OsR498G0511377300.01.T04 | Isocitrate dehydrogenase [NADP]                                      |
| maker-5-augustus-gene-296.41-mRNA-1 | NA | Japonica |           | Os05g0571300 | OsR498G0511372800.01.T01 |                                                                      |
| maker-5-augustus-gene-296.43-mRNA-1 | NA | Indica   |           | Os05g0571300 | OsR498G0511373200.01.T02 |                                                                      |
| maker-5-augustus-gene-296.46-mRNA-1 | NA | NA       |           | Os05g0571400 | OsR498G0511373400.01.T02 | 1-acyl-sn-glycerol-3-phosphate acyltransferase delta isoform 1       |
| maker-5-augustus-gene-296.50-mRNA-1 | NA | NA       |           | Os05g0571700 | OsR498G0511373800.01.T01 | FBD domain-containing protein                                        |
| maker-5-augustus-gene-296.53-mRNA-1 | NA | NA       |           | Os05g0572700 | OsR498G0511375800.01.T01 | Protein-serine/threonine phosphatase                                 |
| maker-5-augustus-gene-297.46-mRNA-1 | NA | NA       |           | Os05g0573500 | OsR498G0511379100.01.T02 | CCAAT-binding transcription factor A                                 |
| maker-5-augustus-gene-297.49-mRNA-1 | NA | NA       |           | 0            | OsR498G0511380300.01.T01 | U-box domain-containing protein 7-like                               |
| maker-5-augustus-gene-297.54-mRNA-1 | NA | Indica   |           | Os05g0575300 | OsR498G0511387900.01.T01 | Tr-type G domain-containing protein                                  |
| maker-5-augustus-gene-297.59-mRNA-1 | NA | Indica   |           | Os05g0575400 | OsR498G0511388300.01.T02 | FBD domain-containing protein                                        |
| maker-5-augustus-gene-297.70-mRNA-1 | NA | NA       |           | 0            | OsR498G0511380600.01.T02 | Tetratricopeptide repeat-like superfamily protein isoform 2          |
| maker-5-augustus-gene-298.55-mRNA-1 | NA | Indica   |           | Os05g0577200 | OsR498G0511394200.01.T05 | Isoprenylcysteine alpha-carbonyl methylesterase ICME                 |
| maker-5-augustus-gene-298.63-mRNA-1 | NA | NA       |           | Os05g0577800 | OsR498G0511395000.01.T03 | Alpha-amylase/subtilisin inhibitor (Fragment)                        |
| maker-5-augustus-gene-298.68-mRNA-1 | NA | NA       |           | Os05g0577900 | OsR498G0511395200.01.T01 | Protein kinase domain-containing protein                             |
| maker-5-augustus-gene-299.20-mRNA-1 | NA | NA       |           | Os05g0579000 | OsR498G0511399000.01.T02 | Sugar transporter protein ERD6-S                                     |
| maker-5-augustus-gene-3.10-mRNA-1   | NA | Indica   |           | Os05g0105500 | OsR498G0509571700.01.T05 | Cytoplasmic membrane protein                                         |
| maker-5-augustus-gene-3.15-mRNA-1   | NA | NA       |           | 0            | OsR498G0509572300.01.T03 | Protein EMBRYO SAC DEVELOPMENT ARREST 3, chloroplastic               |
| maker-5-augustus-gene-3.17-mRNA-1   | NA | NA       |           |              |                          | Arginine/serine-rich splicing factor SR45 transcript III             |
| maker-5-augustus-gene-3.2-mRNA-1    | NA | NA       |           | Os05g0105100 | OsR498G0509570500.01.T01 | RAB GTPase 11C                                                       |
| maker-5-augustus-gene-3.26-mRNA-1   | NA | NA       |           | Os05g0106300 |                          |                                                                      |

|                                     |    |          |               |              |                          |                                                                        |
|-------------------------------------|----|----------|---------------|--------------|--------------------------|------------------------------------------------------------------------|
| maker-5-augustus-gene-3.31-mRNA-1   | NA | NA       |               | Os05g0104800 | OsR498G0509569200.01.T01 | Eukaryotic translation initiation factor 3 subunit F                   |
| maker-5-augustus-gene-3.34-mRNA-1   | NA | NA       |               | 0            | OsR498G0509569400.01.T04 | E3 ubiquitin-protein ligase CHIP                                       |
| maker-5-augustus-gene-3.38-mRNA-1   | NA | NA       |               | Os05g0105000 | OsR498G0509569600.01.T01 | Methionine S-methyltransferase                                         |
| maker-5-augustus-gene-3.4-mRNA-1    | NA | NA       |               | 0            | OsR498G0509571100.01.T05 | Tubulin-specific chaperone E                                           |
| maker-5-augustus-gene-3.41-mRNA-1   | NA | Indica   |               | Os05g0105200 | OsR498G0509571000.01.T03 | RAB GTPase homolog 1A                                                  |
| maker-5-augustus-gene-3.47-mRNA-1   | NA | NA       |               | Os05g0105600 | OsR498G0509572200.01.T01 | YTH domain                                                             |
| maker-5-augustus-gene-3.51-mRNA-1   | NA | NA       |               | Os05g0106000 |                          | Zinc finger family protein isoform 1                                   |
| maker-5-augustus-gene-3.53-mRNA-1   | NA | NA       |               | Os05g0106100 | OsR498G0509572800.01.T01 | V-type proton ATPase proteolipid subunit                               |
| maker-5-augustus-gene-30.15-mRNA-1  | NA | NA       |               | Os05g0153600 |                          | PH domain-containing protein (Fragment)                                |
| maker-5-augustus-gene-30.4-mRNA-1   | NA | NA       |               |              |                          | UBC core domain-containing protein (Fragment)                          |
| maker-5-augustus-gene-301.13-mRNA-1 | NA | Japonica |               | Os05g0584000 | OsR498G0511415500.01.T01 | WRKY transcription factor 22                                           |
| maker-5-augustus-gene-301.19-mRNA-1 | NA | NA       |               | Os05g0583900 | OsR498G0511415200.01.T01 | Pentatricopeptide repeat-containing protein                            |
| maker-5-augustus-gene-301.21-mRNA-1 | NA | NA       |               | Os05g0584200 | OsR498G0511416200.01.T02 | Late embryogenesis abundant                                            |
| maker-5-augustus-gene-302.5-mRNA-1  | NA | Indica   |               | Os05g0584400 | OsR498G0511417200.01.T01 |                                                                        |
| maker-5-augustus-gene-304.87-mRNA-1 | NA | NA       |               | Os05g0589400 | OsR498G0511435200.01.T01 | Transcription factor MYB53                                             |
| maker-5-augustus-gene-306.8-mRNA-1  | NA | NA       |               | Os05g0592400 | OsR498G0511445100.01.T02 | DNA damage-binding protein 1                                           |
| maker-5-augustus-gene-307.0-mRNA-1  | NA | NA       |               | Os05g0594700 | OsR498G0511451100.01.T06 | Calcium permeable stress-gated cation channel 1                        |
| maker-5-augustus-gene-307.15-mRNA-1 | NA | NA       |               | Os05g0595300 | OsR498G0511456100.01.T04 | CCT domain                                                             |
| maker-5-augustus-gene-307.22-mRNA-1 | NA | NA       |               | Os05g0594500 | OsR498G0511449600.01.T01 | Glutaredoxin                                                           |
| maker-5-augustus-gene-307.27-mRNA-1 | NA | NA       |               | Os05g0594800 | OsR498G0511451400.01.T03 | Regulatory particle non-ATPase 13 (Fragment)                           |
| maker-5-augustus-gene-307.33-mRNA-1 | NA | NA       |               | Os05g0595400 | OsR498G0511456600.01.T01 | Nucleoside diphosphate kinase                                          |
| maker-5-augustus-gene-307.38-mRNA-1 | NA | NA       |               | Os05g0595500 | OsR498G0511456800.01.T02 | PH domain-containing protein                                           |
| maker-5-augustus-gene-307.6-mRNA-1  | NA | NA       |               | Os05g0594900 |                          | U6 snRNA-associated Sm-like protein LSM8                               |
| maker-5-augustus-gene-307.9-mRNA-1  | NA | NA       |               | Os05g0595100 | OsR498G0511452700.01.T01 | UDP-glucose 4-epimerase GEPI48                                         |
| maker-5-augustus-gene-308.42-mRNA-1 | NA | NA       |               |              |                          | Chloride channel protein CLC-f                                         |
| maker-5-augustus-gene-308.45-mRNA-1 | NA | NA       |               | Os03g0347800 | OsR498G0305940700.01.T04 | Peptidyl-tRNA hydrolase mitochondrial                                  |
| maker-5-augustus-gene-308.53-mRNA-1 | NA | NA       |               | 0            | OsR498G0511461300.01.T01 | Transcription factor bHLH70 isoform A                                  |
| maker-5-augustus-gene-308.55-mRNA-1 | NA | NA       |               | Os05g0597400 | OsR498G0511462100.01.T01 | G1/S-specific cyclin-E protein                                         |
| maker-5-augustus-gene-308.57-mRNA-1 | NA | NA       |               | 0            | OsR498G1221332900.01.T01 | CCHC-type domain-containing protein                                    |
| maker-5-augustus-gene-308.58-mRNA-1 | NA | NA       | Kinase-LRR-TM | Os05g0595950 | OsR498G0511457400.01.T01 | Leucine-rich repeat receptor-like serine/threonine-protein kinase BAM3 |
| maker-5-augustus-gene-308.61-mRNA-1 | NA | Indica   |               | Os05g0596200 | OsR498G0511458800.01.T02 | Calpain-type cysteine protease family                                  |
| maker-5-augustus-gene-308.64-mRNA-1 | NA | NA       |               | 0            | OsR498G0102056900.01.T01 | L10-interacting MYB domain-containing protein-like                     |
| maker-5-augustus-gene-308.66-mRNA-1 | NA | NA       |               | Os05g0596600 | OsR498G0511460400.01.T01 |                                                                        |
| maker-5-augustus-gene-308.73-mRNA-1 | NA | NA       |               | Os05g0597100 | OsR498G0511462000.01.T01 | Histone deacetylase HDAC2                                              |
| maker-5-augustus-gene-309.24-mRNA-1 | NA | NA       |               | Os08g0363800 | OsR498G0815927700.01.T02 | Iron-sulfur assembly protein IscA-like protein 2, mitochondrial        |
| maker-5-augustus-gene-310.0-mRNA-1  | NA | NA       |               | 0            | OsR498G0815909100.01.T01 |                                                                        |
| maker-5-augustus-gene-310.11-mRNA-1 | NA | NA       | Kinase-TM     | Os08g0365800 |                          | Putative WAK family receptor-like protein kinase                       |
| maker-5-augustus-gene-310.13-mRNA-1 | NA | NA       |               | Os08g0365900 | OsR498G0815911800.01.T04 | Putative methyltransferase NSUN6                                       |
| maker-5-augustus-gene-310.16-mRNA-1 | NA | NA       |               | Os08g0366000 | OsR498G0815912200.01.T03 | Phosphoenolpyruvate carboxylase                                        |
| maker-5-augustus-gene-310.2-mRNA-1  | NA | NA       |               | Os08g0364900 | OsR498G0815911100.01.T05 | Pirin domain-containing protein                                        |
| maker-5-augustus-gene-310.8-mRNA-1  | NA | NA       |               | Os08g0366100 | OsR498G0815912500.01.T01 | Multiprotein-bridging factor 1b                                        |
| maker-5-augustus-gene-311.29-mRNA-1 | NA | NA       |               | Os08g0366200 | OsR498G0815913800.01.T01 | Elf4 domain-containing protein                                         |
| maker-5-augustus-gene-312.40-mRNA-1 | NA | Japonica |               | Os05g0584000 | OsR498G0511415500.01.T01 | WRKY transcription factor 22                                           |
| maker-5-augustus-gene-312.43-mRNA-1 | NA | Indica   |               | Os05g0310800 | OsR498G0815920400.01.T01 | Coatomer subunit delta                                                 |
| maker-5-augustus-gene-312.48-mRNA-1 | NA | NA       |               | Os05g0503000 | OsR498G0511123000.01.T01 | Secretory carrier-associated membrane protein 3                        |
| maker-5-augustus-gene-312.53-mRNA-1 | NA | NA       |               | Os05g0584200 | OsR498G0511416200.01.T02 | Late embryogenesis abundant                                            |
| maker-5-augustus-gene-312.55-mRNA-1 | NA | Indica   |               | Os05g0584400 | OsR498G0511417200.01.T01 |                                                                        |
| maker-5-augustus-gene-34.33-mRNA-1  | NA | NA       |               | Os05g0158600 | OsR498G0509783500.01.T01 | Gibberellin 2-beta-dioxygenase 1                                       |
| maker-5-augustus-gene-35.0-mRNA-1   | NA | Indica   |               | Os01g0328700 | OsR498G0509787700.01.T01 | Dihydrolipoyl dehydrogenase                                            |
| maker-5-augustus-gene-35.2-mRNA-1   | NA | NA       |               | Os05g0160100 | OsR498G0509787900.01.T01 | Macrophage erythroblast attacher like                                  |
| maker-5-augustus-gene-36.44-mRNA-1  | NA | NA       |               | Os05g0161500 | OsR498G0509793900.01.T01 | GTP diphosphokinase                                                    |
| maker-5-augustus-gene-36.55-mRNA-1  | NA | NA       |               | Os05g0162000 | OsR498G0509795000.01.T01 | Peroxidase                                                             |
| maker-5-augustus-gene-36.57-mRNA-1  | NA | Indica   |               | Os01g0155400 | OsR498G0509795200.01.T01 |                                                                        |
| maker-5-augustus-gene-36.72-mRNA-1  | NA | NA       |               | 0            | OsR498G0509798200.01.T01 | Pre-mRNA-processing-splicing factor 8A                                 |
| maker-5-augustus-gene-37.0-mRNA-1   | NA | NA       |               | Os05g0163900 | OsR498G0509801500.01.T02 | Transcription factor bHLH30 like                                       |
| maker-5-augustus-gene-37.18-mRNA-1  | NA | NA       |               | 0            | OsR498G0509803000.01.T01 | PDZ domain-containing protein                                          |
| maker-5-augustus-gene-37.24-mRNA-1  | NA | NA       |               | Os05g0164900 | OsR498G0509804600.01.T01 | DCD domain-containing protein (Fragment)                               |
| maker-5-augustus-gene-39.10-mRNA-1  | NA | NA       |               | Os05g0168200 | OsR498G0509819800.01.T01 | PGG domain-containing protein                                          |
| maker-5-augustus-gene-39.20-mRNA-1  | NA | NA       |               | Os05g0168700 | OsR498G0509822000.01.T03 | TPT domain-containing protein                                          |
| maker-5-augustus-gene-39.29-mRNA-1  | NA | Indica   |               | Os05g0169400 | OsR498G0509825000.01.T01 | Class E vacuolar protein-sorting machinery protein HSE1-like           |
| maker-5-augustus-gene-39.3-mRNA-1   | NA | NA       |               | Os05g0169100 | OsR498G0509823300.01.T02 | 60S ribosomal protein L10                                              |

|                                    |    |          |               |              |                          |                                                                            |
|------------------------------------|----|----------|---------------|--------------|--------------------------|----------------------------------------------------------------------------|
| maker-5-augustus-gene-39.6-mRNA-1  | NA | NA       |               | Os05g0169200 | OsR498G0509823500.01.T03 | Homolog of yeast autophagy 18C                                             |
| maker-5-augustus-gene-39.8-mRNA-1  | NA | NA       |               | Os05g0169300 | OsR498G0509824100.01.T01 | Tryptophan aminotransferase                                                |
| maker-5-augustus-gene-4.28-mRNA-1  | NA | NA       |               | Os05g0106500 | OsR498G0509574300.01.T01 | J domain-containing protein (Fragment)                                     |
| maker-5-augustus-gene-4.48-mRNA-1  | NA | NA       |               | Os05g0106600 | OsR498G0509574600.01.T04 | Beta-actin                                                                 |
| maker-5-augustus-gene-4.53-mRNA-1  | NA | NA       |               | 0            | OsR498G0509575400.01.T01 | F-box domain-containing protein                                            |
| maker-5-augustus-gene-40.0-mRNA-1  | NA | Indica   | Kinase-LRR-TM | Os01g0170300 | OsR498G0509825300.01.T01 | Mitogen-activated protein kinase kinase kinase                             |
| maker-5-augustus-gene-40.14-mRNA-1 | NA | Indica   |               | Os01g0170500 | OsR498G0509825800.01.T02 | Carboxyl-terminal proteinase                                               |
| maker-5-augustus-gene-40.17-mRNA-1 | NA | NA       |               | Os05g0170000 | OsR498G0509826200.01.T01 | Core-2/l-branching beta-1,6-N-acetylglucosaminyltransferase family protein |
| maker-5-augustus-gene-40.2-mRNA-1  | NA | NA       | LRR-TM        | Os05g0170300 | OsR498G0509827700.01.T01 | LRR receptor-like serine/threonine-protein kinase                          |
| maker-5-augustus-gene-40.23-mRNA-1 | NA | NA       | LRR-TM        | Os05g0170700 | OsR498G0509830600.01.T01 | Protein NSP-INTERACTING KINASE 2                                           |
| maker-5-augustus-gene-40.26-mRNA-1 | NA | NA       |               | Os05g0170800 | OsR498G0509830800.01.T02 | SKP1/ASK-interacting protein 16 isoform 1                                  |
| maker-5-augustus-gene-40.29-mRNA-1 | NA | Indica   |               | Os05g0171000 | OsR498G0509831400.01.T02 | Phospholipase D                                                            |
| maker-5-augustus-gene-40.4-mRNA-1  | NA | Indica   |               | Os01g0172100 | OsR498G0509831100.01.T03 | Phosphoenolpyruvate/phosphate translocator like                            |
| maker-5-augustus-gene-40.9-mRNA-1  | NA | NA       |               | Os05g0171200 | OsR498G0509831700.01.T01 | Embryo-specific protein ATS3A                                              |
| maker-5-augustus-gene-41.0-mRNA-1  | NA | NA       |               | Os05g0171900 | OsR498G0509835300.01.T04 | VOC domain-containing protein (Fragment)                                   |
| maker-5-augustus-gene-41.3-mRNA-1  | NA | NA       |               | 0            | OsR498G0509835800.01.T01 | Protein kinase domain-containing protein                                   |
| maker-5-augustus-gene-41.6-mRNA-1  | NA | NA       |               | 0            | OsR498G0509836400.01.T01 | DUF632 domain-containing protein/DUF630 domain-containing protein          |
| maker-5-augustus-gene-44.0-mRNA-1  | NA | NA       |               | Os03g0851000 | OsR498G0307374300.01.T03 | Nascent polypeptide-associated complex subunit beta                        |
| maker-5-augustus-gene-44.3-mRNA-1  | NA | NA       |               | Os03g0850800 | OsR498G0307373800.01.T01 | Transferring glycosyl group transferase                                    |
| maker-5-augustus-gene-44.5-mRNA-1  | NA | NA       |               | Os03g0851100 | OsR498G0307374600.01.T01 | Elongation factor Tu mitochondrial                                         |
| maker-5-augustus-gene-45.0-mRNA-1  | NA | NA       |               | 0            | OsR498G0509846900.01.T01 | Mediator of RNA polymerase II transcription subunit 36a                    |
| maker-5-augustus-gene-45.11-mRNA-1 | NA | Japonica |               | Os05g0173700 | OsR498G0511038100.01.T02 | DNA replication licensing factor MCM3                                      |
| maker-5-augustus-gene-45.22-mRNA-1 | NA | NA       |               | Os05g0176400 | OsR498G0509848000.01.T01 | Zinc finger CCCH domain-containing protein 34                              |
| maker-5-augustus-gene-45.25-mRNA-1 | NA | NA       |               | Os05g0176500 | OsR498G0509848400.01.T02 | Mitochondria isoform 2                                                     |
| maker-5-augustus-gene-45.30-mRNA-1 | NA | NA       |               | Os05g0176800 | OsR498G0509849600.01.T01 | Boron transporter                                                          |
| maker-5-augustus-gene-46.38-mRNA-1 | NA | NA       |               | 0            | OsR498G0509851500.01.T01 | UDP-glucuronosyl/UDP-glucosyltransferase                                   |
| maker-5-augustus-gene-46.45-mRNA-1 | NA | NA       |               | Os05g0179000 | OsR498G0509856700.01.T03 | RING-type domain-containing protein (Fragment)                             |
| maker-5-augustus-gene-49.0-mRNA-1  | NA | NA       |               | Os05g0182500 | OsR498G0509872900.01.T03 | Ubiquitin-fold modifier-conjugating enzyme                                 |
| maker-5-augustus-gene-49.18-mRNA-1 | NA | NA       |               | Os05g0182800 | OsR498G0509873600.01.T01 | Glutaminyl-tRNA synthetase                                                 |
| maker-5-augustus-gene-49.25-mRNA-1 | NA | NA       |               | Os05g0182900 | OsR498G0509873800.01.T01 | Glutaminyl-tRNA synthetase                                                 |
| maker-5-augustus-gene-49.28-mRNA-1 | NA | NA       |               | Os05g0183100 | OsR498G0509875200.01.T01 | WRKY transcription factor                                                  |
| maker-5-augustus-gene-49.3-mRNA-1  | NA | NA       |               | Os05g0182600 | OsR498G0509873100.01.T01 | FACT complex subunit SSRP1-B                                               |
| maker-5-augustus-gene-49.7-mRNA-1  | NA | NA       |               | Os05g0182700 | OsR498G0509873300.01.T02 |                                                                            |
| maker-5-augustus-gene-52.15-mRNA-1 | NA | NA       |               | 0            | OsR498G0509888600.01.T08 | (R)-specific enoyl-CoA hydratase-like                                      |
| maker-5-augustus-gene-52.18-mRNA-1 | NA | Indica   |               | Os05g0186000 | OsR498G0509890000.01.T06 | 30S ribosomal protein S31, chloroplastic                                   |
| maker-5-augustus-gene-52.20-mRNA-1 | NA | NA       |               | Os05g0186100 | OsR498G0509890200.01.T01 | HPT domain-containing protein (Fragment)                                   |
| maker-5-augustus-gene-52.23-mRNA-1 | NA | NA       |               | Os05g0186300 | OsR498G0509891000.01.T01 | NADP-dependent malic enzyme, chloroplastic                                 |
| maker-5-augustus-gene-52.6-mRNA-1  | NA | NA       |               | Os05g0185800 | OsR498G0509889700.01.T04 | Actin binding protein family                                               |
| maker-5-augustus-gene-52.9-mRNA-1  | NA | NA       |               | Os05g0185700 | OsR498G0509888600.01.T03 | PfkB domain-containing protein                                             |
| maker-5-augustus-gene-53.0-mRNA-1  | NA | Indica   |               | Os01g0190300 | OsR498G0509894900.01.T02 | Auxin-responsive protein (Fragment)                                        |
| maker-5-augustus-gene-53.15-mRNA-1 | NA | Indica   |               | Os05g0187100 | OsR498G0509895600.01.T01 | Phosphotransferase                                                         |
| maker-5-augustus-gene-53.3-mRNA-1  | NA | NA       |               | Os05g0187000 | OsR498G0509895300.01.T05 | Proteasome endopeptidase complex                                           |
| maker-5-augustus-gene-54.58-mRNA-1 | NA | NA       |               | Os05g0189300 | OsR498G0509906000.01.T01 | Pod storage protein                                                        |
| maker-5-augustus-gene-54.60-mRNA-1 | NA | NA       |               | Os05g0189900 | OsR498G0509907200.01.T01 | Stem 28 kDa glycoprotein                                                   |
| maker-5-augustus-gene-55.4-mRNA-1  | NA | NA       |               | Os05g0190300 | OsR498G0509909600.01.T01 | Stem 28 kDa glycoprotein-like                                              |
| maker-5-augustus-gene-55.6-mRNA-1  | NA | NA       |               | Os05g0190500 | OsR498G0509910600.01.T01 | Stem 28 kDa glycoprotein                                                   |
| maker-5-augustus-gene-56.0-mRNA-1  | NA | NA       |               | 0            | OsR498G0509916300.01.T02 | Crs2 associated factor2                                                    |
| maker-5-augustus-gene-56.9-mRNA-1  | NA | NA       |               | 0            | OsR498G0509916000.01.T03 | Cullin, N-terminal                                                         |
| maker-5-augustus-gene-57.3-mRNA-1  | NA | Indica   |               | Os01g0191300 | OsR498G0509917000.01.T01 | NAC transcriptional factor                                                 |
| maker-5-augustus-gene-57.6-mRNA-1  | NA | NA       |               |              |                          | Probable tRNA N6-adenosine threonylcarbamoyltransferase                    |
| maker-5-augustus-gene-58.0-mRNA-1  | NA | NA       |               | 0            | OsR498G0509927900.01.T02 | ATP-binding cassette sub-family C member 8                                 |
| maker-5-augustus-gene-58.13-mRNA-1 | NA | NA       |               | Os05g0196800 | OsR498G0509933500.01.T03 | Diacylglycerol O-acyltransferase                                           |
| maker-5-augustus-gene-58.20-mRNA-1 | NA | Indica   |               | Os01g0192600 | OsR498G0509928200.01.T04 | Pollen-specific protein SF21                                               |
| maker-5-augustus-gene-58.6-mRNA-1  | NA | NA       |               | Os05g0196500 | OsR498G0509930700.01.T01 | Lysine-specific demethylase JM1703                                         |
| maker-5-augustus-gene-59.0-mRNA-1  | NA | Indica   |               | Os05g0198050 | OsR498G0509938500.01.T05 |                                                                            |
| maker-5-augustus-gene-59.2-mRNA-1  | NA | NA       |               | Os05g0197300 | OsR498G0509935200.01.T04 | IQ domain-containing protein IQM6                                          |
| maker-5-augustus-gene-6.31-mRNA-1  | NA | NA       | Kinase-TM     | Os05g0110900 | OsR498G0509586800.01.T01 | Receptor-like cytoplasmic kinase 176                                       |
| maker-5-augustus-gene-6.4-mRNA-1   | NA | Indica   |               | Os05g0110800 | OsR498G0509586500.01.T01 | PGR5-like protein 1A, chloroplastic                                        |
| maker-5-augustus-gene-60.0-mRNA-1  | NA | NA       |               | Os05g0198400 | OsR498G0509944500.01.T01 | Zinc transporter 4, chloroplastic                                          |
| maker-5-augustus-gene-60.3-mRNA-1  | NA | Indica   |               | Os05g0198700 | OsR498G0509949300.01.T02 | RNA polymerase II transcription factor B subunit 5                         |
| maker-5-augustus-gene-61.22-mRNA-1 | NA | NA       |               | Os05g0199800 | OsR498G0509955700.01.T01 | BHLH domain-containing protein (Fragment)                                  |

|                                     |    |          |               |              |                          |                                                                  |
|-------------------------------------|----|----------|---------------|--------------|--------------------------|------------------------------------------------------------------|
| maker-5-augustus-gene-61.24-mRNA-1  | NA | NA       |               | Os05g0199500 | OsR498G0509955000.01.T02 | Hexosyltransferase                                               |
| maker-5-augustus-gene-61.27-mRNA-1  | NA | NA       |               | Os05g0200100 | OsR498G0509956600.01.T01 | Thioredoxin-like 2, chloroplastic isoform B                      |
| maker-5-augustus-gene-62.0-mRNA-1   | NA | Indica   |               | Os01g0197100 | OsR498G0509961300.01.T02 | 3-epi-6-deoxocastasterone 23-monooxygenase                       |
| maker-5-augustus-gene-62.4-mRNA-1   | NA | NA       |               | Os05g0200500 | OsR498G0509961600.01.T03 | Protein kinase domain-containing protein                         |
| maker-5-augustus-gene-63.27-mRNA-1  | NA | NA       |               | 0            | OsR498G0509971300.01.T01 |                                                                  |
| maker-5-augustus-gene-63.35-mRNA-1  | NA | Indica   |               | Os05g0203800 | OsR498G0509975600.01.T01 | MADS-box transcription factor                                    |
| maker-5-augustus-gene-63.40-mRNA-1  | NA | NA       |               | 0            | OsR498G0509977200.01.T04 | MADS box transcription factor                                    |
| maker-5-augustus-gene-63.41-mRNA-1  | NA | NA       |               | 0            | OsR498G0509977200.01.T04 | Shatterproof                                                     |
| maker-5-augustus-gene-64.34-mRNA-1  | NA | NA       |               | Os05g0204600 | OsR498G0509981100.01.T01 | B-box zinc finger protein 22                                     |
| maker-5-augustus-gene-64.36-mRNA-1  | NA | NA       |               | Os05g0204900 | OsR498G0509982500.01.T03 | Serine/threonine-protein phosphatase 5                           |
| maker-5-augustus-gene-64.43-mRNA-1  | NA | NA       |               | Os05g0203900 | OsR498G0509978600.01.T05 |                                                                  |
| maker-5-augustus-gene-64.46-mRNA-1  | NA | Indica   |               | Os02g0232900 | OsR498G0509982800.01.T01 | Aquaporin NIP-type                                               |
| maker-5-augustus-gene-65.0-mRNA-1   | NA | NA       |               | Os06g0303700 | OsR498G0612215700.01.T02 |                                                                  |
| maker-5-augustus-gene-66.31-mRNA-1  | NA | NA       |               | Os05g0207300 | OsR498G0509990500.01.T01 | 60S ribosomal protein L11                                        |
| maker-5-augustus-gene-66.49-mRNA-1  | NA | NA       |               | Os05g0207400 | OsR498G0509990800.01.T01 | RING-CH-type domain-containing protein (Fragment)                |
| maker-5-augustus-gene-70.2-mRNA-1   | NA | NA       |               | Os05g0214400 | OsR498G0510016900.01.T01 | KAT8 regulatory NSL complex subunit 3                            |
| maker-5-augustus-gene-70.4-mRNA-1   | NA | NA       |               | Os05g0214400 | OsR498G0510016900.01.T01 | KAT8 regulatory NSL complex subunit 3                            |
| maker-5-augustus-gene-74.40-mRNA-1  | NA | NA       |               | Os05g0220900 | OsR498G0510046700.01.T01 |                                                                  |
| maker-5-augustus-gene-74.50-mRNA-1  | NA | NA       |               | Os05g0220100 | OsR498G0510044200.01.T04 | Post-GPI attachment to proteins factor 3                         |
| maker-5-augustus-gene-74.53-mRNA-1  | NA | NA       |               | Os05g0220600 | OsR498G0510046200.01.T02 | Rhomboid-like protein 11, chloroplastic                          |
| maker-5-augustus-gene-74.58-mRNA-1  | NA | Indica   |               | Os01g0750500 | OsR498G0510048200.01.T01 | Coiled-coil domain-containing protein 25                         |
| maker-5-augustus-gene-75.38-mRNA-1  | NA | NA       |               | Os05g0223300 | OsR498G0510054500.01.T01 | RRM domain-containing protein                                    |
| maker-5-augustus-gene-75.40-mRNA-1  | NA | Indica   |               | Os05g0223300 | OsR498G0510054900.01.T01 | RRM domain-containing protein (Fragment)                         |
| maker-5-augustus-gene-75.42-mRNA-1  | NA | NA       | NBS-TM        | Os05g0222200 | OsR498G0510052200.01.T01 | Eceriferum 5 (Fragment)                                          |
| maker-5-augustus-gene-76.31-mRNA-1  | NA | Indica   |               | Os05g0224700 | OsR498G0510059900.01.T01 | DNA-directed RNA polymerase V subunit like                       |
| maker-5-augustus-gene-76.33-mRNA-1  | NA | NA       |               |              |                          | DNA (cytosine-5)-methyltransferase CMT2                          |
| maker-5-augustus-gene-77.0-mRNA-1   | NA | NA       |               | 0            | OsR498G0510066500.01.T05 | GRAM domain-containing protein (Fragment)                        |
| maker-5-augustus-gene-78.30-mRNA-1  | NA | NA       |               | Os05g0227800 | OsR498G0510071700.01.T02 | NAM-associated domain-containing protein                         |
| maker-5-augustus-gene-78.32-mRNA-1  | NA | NA       |               | Os05g0227700 | OsR498G0510071600.01.T01 | Eukaryotic translation initiation factor 3 subunit L             |
| maker-5-augustus-gene-78.35-mRNA-1  | NA | NA       |               | Os05g0228000 | OsR498G0510072400.01.T02 | Bark storage protein like                                        |
| maker-5-augustus-gene-79.39-mRNA-1  | NA | NA       |               | Os05g0229000 | OsR498G0510076400.01.T05 | G patch domain-containing protein 8                              |
| maker-5-augustus-gene-86.11-mRNA-1  | NA | NA       |               | Os05g0241000 | OsR498G0510123000.01.T02 | WPP domain-interacting tail-anchored protein 1                   |
| maker-5-augustus-gene-86.6-mRNA-1   | NA | NA       | NBS-TM        | Os05g0240200 | OsR498G0510120000.01.T03 | TOPILESS-related 1 isoform 2                                     |
| maker-5-augustus-gene-96.0-mRNA-1   | NA | NA       |               | Os11g0500100 |                          | HAT dimerization domain-containing protein / transposase-related |
| maker-5-augustus-gene-96.10-mRNA-1  | NA | Indica   | Kinase-LRR-TM | Os05g0257100 | OsR498G0510172500.01.T03 | Non-specific serine/threonine protein kinase                     |
| maker-5-augustus-gene-97.0-mRNA-1   | NA | NA       |               |              |                          | Non-specific serine/threonine protein kinase                     |
| maker-5-augustus-gene-97.1-mRNA-1   | NA | Indica   | Kinase-LRR-TM | Os04g0291900 | OsR498G0510174900.01.T01 | Non-specific serine/threonine protein kinase                     |
| maker-5-augustus-gene-97.14-mRNA-1  | NA | Indica   |               | Os04g0341500 | OsR498G0510177900.01.T01 | (+)-delta-cadinene synthase isozyme C2                           |
| maker-5-augustus-gene-97.16-mRNA-1  | NA | NA       |               |              |                          | Transposon protein, putative, Mutator sub-class, expressed       |
| maker-5-augustus-gene-98.21-mRNA-1  | NA | NA       |               | 0            | OsR498G0510180100.01.T01 | Non-specific serine/threonine protein kinase                     |
| maker-5-augustus-gene-98.23-mRNA-1  | NA | NA       | LRR-TM        | Os04g0291900 | OsR498G0407958200.01.T02 | Non-specific serine/threonine protein kinase                     |
| maker-5-augustus-gene-98.24-mRNA-1  | NA | NA       | Kinase        | Os04g0291900 | OsR498G0407958200.01.T01 | Non-specific serine/threonine protein kinase                     |
| maker-5-augustus-gene-99.0-mRNA-1   | NA | NA       |               | Os09g0120033 | OsR498G0202840400.01.T01 |                                                                  |
| maker-5-augustus-gene-99.1-mRNA-1   | NA | NA       |               | Os09g0120033 | OsR498G0202840400.01.T01 |                                                                  |
| maker-6-augustus-gene-10.0-mRNA-1   | NA | Japonica |               | Os06g0660600 | OsR498G0613108200.01.T01 | NAM-associated domain-containing protein                         |
| maker-6-augustus-gene-10.2-mRNA-1   | NA | Japonica |               | Os06g0117500 | OsR498G0611524600.01.T01 | DUF4220 domain-containing protein (Fragment)                     |
| maker-6-augustus-gene-10.4-mRNA-1   | NA | Indica   |               | Os06g0119600 | OsR498G0611518800.01.T01 | Peptidase A1 domain-containing protein (Fragment)                |
| maker-6-augustus-gene-10.6-mRNA-1   | NA | NA       |               | Os06g0118700 | OsR498G0611521800.01.T01 | Peptidase A1 domain-containing protein (Fragment)                |
| maker-6-augustus-gene-100.0-mRNA-1  | NA | NA       |               | Os06g0286228 | OsR498G0612156900.01.T01 | Phytoecyanin domain-containing protein                           |
| maker-6-augustus-gene-100.2-mRNA-1  | NA | NA       |               | Os06g0285900 | OsR498G0612153400.01.T01 | PGG domain-containing protein                                    |
| maker-6-augustus-gene-100.4-mRNA-1  | NA | NA       |               | 0            | OsR498G0612153800.01.T01 | PGG domain-containing protein (Fragment)                         |
| maker-6-augustus-gene-100.8-mRNA-1  | NA | NA       |               | Os06g0286146 | OsR498G0612156000.01.T01 | PGG domain-containing protein (Fragment)                         |
| maker-6-augustus-gene-101.19-mRNA-1 | NA | Indica   |               | Os06g0286310 | OsR498G0612158300.01.T01 | DNA oxidative demethylase                                        |
| maker-6-augustus-gene-101.22-mRNA-1 | NA | NA       | NBS-TM        | Os06g0286500 | OsR498G0612159700.01.T01 | NBS-LRR disease resistance protein homologue                     |
| maker-6-augustus-gene-101.24-mRNA-1 | NA | NA       |               | Os06g0286351 | OsR498G0612158600.01.T01 | Binding                                                          |
| maker-6-augustus-gene-102.41-mRNA-1 | NA | NA       | CC-NBS-TM     |              |                          | NBS-LRR                                                          |
| maker-6-augustus-gene-102.42-mRNA-1 | NA | NA       | NBS-TM        |              |                          | Disease resistance protein RPM1                                  |
| maker-6-augustus-gene-102.49-mRNA-1 | NA | NA       | NBS-TM        | 0            | OsR498G0612165900.01.T03 | Disease resistance protein RPM1                                  |
| maker-6-augustus-gene-103.0-mRNA-1  | NA | NA       |               | Os03g0193900 | OsR498G0101213400.01.T05 | SERPIN domain-containing protein                                 |
| maker-6-augustus-gene-104.0-mRNA-1  | NA | NA       |               | 0            | OsR498G0612170100.01.T02 | Usp domain-containing protein (Fragment)                         |
| maker-6-augustus-gene-104.6-mRNA-1  | NA | NA       | Kinase-TM     | Os06g0291600 | OsR498G0612170400.01.T02 | serine/threonine-protein kinase D6PK                             |

|                                     |    |          |               |              |                          |                                                                   |
|-------------------------------------|----|----------|---------------|--------------|--------------------------|-------------------------------------------------------------------|
| maker-6-augustus-gene-104.8-mRNA-1  | NA | NA       |               | Os06g0291800 |                          | Embryogenesis transmembrane protein                               |
| maker-6-augustus-gene-105.0-mRNA-1  | NA | NA       |               | Os10g0199200 | OsR498G1018346900.01.T03 | Hydroxyproline-rich glycoprotein-like                             |
| maker-6-augustus-gene-107.2-mRNA-1  | NA | NA       |               | Os06g0297800 | OsR498G0612190900.01.T05 | C2 calcium-dependent membrane targeting                           |
| maker-6-augustus-gene-109.35-mRNA-1 | NA | NA       |               | 0            | OsR498G0612202900.01.T04 | Enhancer of mRNA-decapping protein 4                              |
| maker-6-augustus-gene-109.36-mRNA-1 | NA | NA       |               | 0            | OsR498G0612202900.01.T01 | WD40, G-beta domain containing family protein, family             |
| maker-6-augustus-gene-109.45-mRNA-1 | NA | NA       |               | Os06g0300000 | OsR498G0612200000.01.T01 | Putative steroid dehydrogenase 4                                  |
| maker-6-augustus-gene-11.47-mRNA-1  | NA | Japonica |               | Os06g0121800 | OsR498G0611535100.01.T01 | Peptidase A1 domain-containing protein                            |
| maker-6-augustus-gene-11.50-mRNA-1  | NA | Japonica |               | Os06g0119600 | OsR498G0203481100.01.T01 | Peptidase A1 domain-containing protein (Fragment)                 |
| maker-6-augustus-gene-111.0-mRNA-1  | NA | Japonica |               | Os06g0303400 | OsR498G0815345200.01.T05 | Aconitate hydratase                                               |
| maker-6-augustus-gene-113.0-mRNA-1  | NA | NA       |               |              |                          | Peptidase A1 domain-containing protein (Fragment)                 |
| maker-6-augustus-gene-114.63-mRNA-1 | NA | NA       |               | Os06g0309000 | OsR498G0612230200.01.T03 | Putative RING zinc finger domain superfamily protein isoform 1    |
| maker-6-augustus-gene-114.67-mRNA-1 | NA | NA       |               | 0            | OsR498G0612230200.01.T04 | BPI2 domain-containing protein                                    |
| maker-6-augustus-gene-114.70-mRNA-1 | NA | NA       |               | Os06g0310200 | OsR498G0408570300.01.T06 | Putative helicase MAGATAMA 3                                      |
| maker-6-augustus-gene-115.3-mRNA-1  | NA | Japonica |               | Os06g0310200 | OsR498G0408570300.01.T02 | Regulator of nonsense transcripts 1-like                          |
| maker-6-augustus-gene-12.37-mRNA-1  | NA | NA       |               | Os06g0122600 |                          | NB-ARC domain-containing protein                                  |
| maker-6-augustus-gene-12.43-mRNA-1  | NA | NA       |               | Os06g0122900 |                          |                                                                   |
| maker-6-augustus-gene-12.45-mRNA-1  | NA | Japonica |               | Os06g0122600 | OsR498G0611538700.01.T02 |                                                                   |
| maker-6-augustus-gene-12.48-mRNA-1  | NA | NA       |               | Os06g0123000 | OsR498G0611540200.01.T01 |                                                                   |
| maker-6-augustus-gene-122.35-mRNA-1 | NA | NA       |               | Os08g0230450 | OsR498G1221360100.01.T03 |                                                                   |
| maker-6-augustus-gene-13.34-mRNA-1  | NA | NA       |               | Os06g0125200 | OsR498G0611547100.01.T01 | FLZ-type domain-containing protein (Fragment)                     |
| maker-6-augustus-gene-13.36-mRNA-1  | NA | Indica   |               | Os06g0125600 | OsR498G0611548700.01.T03 | Pentatricopeptide repeat-containing protein (Fragment)            |
| maker-6-augustus-gene-13.38-mRNA-1  | NA | NA       | LRR-NBS-TM    | Os06g0125000 | OsR498G0611546000.01.T05 | NBS-LRR type R protein Pigm-R8                                    |
| maker-6-augustus-gene-13.40-mRNA-1  | NA | Indica   |               | Os06g0125500 | OsR498G0611547600.01.T02 | Oligopeptide transporter 7                                        |
| maker-6-augustus-gene-134.30-mRNA-1 | NA | NA       |               | 0            | OsR498G0612525600.01.T02 | tRNA-uridine aminocarboxypropyltransferase                        |
| maker-6-augustus-gene-14.13-mRNA-1  | NA | NA       |               | Os06g0127700 | OsR498G0611553900.01.T01 | Oligopeptide transporter 7                                        |
| maker-6-augustus-gene-14.16-mRNA-1  | NA | NA       |               | 0            | OsR498G0611555300.01.T01 | Transferases,folic acid binding isoform 1                         |
| maker-6-augustus-gene-14.18-mRNA-1  | NA | Indica   |               | Os06g0126000 | OsR498G0611549600.01.T04 | Putative transcriptional regulator SKL2                           |
| maker-6-augustus-gene-14.24-mRNA-1  | NA | NA       |               | Os06g0126400 | OsR498G0611550400.01.T01 |                                                                   |
| maker-6-augustus-gene-14.26-mRNA-1  | NA | NA       |               |              |                          | SET domain-containing protein isoform 3                           |
| maker-6-augustus-gene-14.3-mRNA-1   | NA | NA       |               | Os06g0125800 | OsR498G0611549100.01.T04 | E3 ubiquitin ligase BIG BROTHER                                   |
| maker-6-augustus-gene-14.31-mRNA-1  | NA | NA       | Kinase-TM     | 0            | OsR498G0611553400.01.T01 | Calcium-dependent protein kinase, putative                        |
| maker-6-augustus-gene-15.36-mRNA-1  | NA | Indica   |               | Os06g0128400 | OsR498G0611556500.01.T01 | Embryo sac development arrest                                     |
| maker-6-augustus-gene-15.42-mRNA-1  | NA | NA       |               |              |                          | 39S ribosomal protein L47, mitochondrial                          |
| maker-6-augustus-gene-15.45-mRNA-1  | NA | NA       |               | 0            | OsR498G0611557700.01.T01 | Probable E3 ubiquitin-protein ligase XBOS36                       |
| maker-6-augustus-gene-15.52-mRNA-1  | NA | Indica   |               | Os03g0115700 | OsR498G0611559300.01.T01 | Short-chain dehydrogenase TIC 32, chloroplastic                   |
| maker-6-augustus-gene-15.63-mRNA-1  | NA | Indica   |               | Os06g0156700 | OsR498G0611560700.01.T01 | GDLS-like Lipase/Acylhydrolase family protein, expressed          |
| maker-6-augustus-gene-15.68-mRNA-1  | NA | NA       |               | Os06g0128200 | OsR498G0611556000.01.T02 | LMBR1 integral membrane family protein                            |
| maker-6-augustus-gene-15.77-mRNA-1  | NA | NA       |               | Os06g0128300 | OsR498G0611556400.01.T02 | ABC transporter B family member 25 mitochondrial                  |
| maker-6-augustus-gene-15.83-mRNA-1  | NA | NA       |               | Os06g0129300 | OsR498G0611559800.01.T03 | Impaired sucrose induction 1-like protein                         |
| maker-6-augustus-gene-15.86-mRNA-1  | NA | Indica   |               | Os06g0129700 | OsR498G0611561000.01.T01 | Nucleoside diphosphate-sugar hydrolase of the MutT (NUDIX) family |
| maker-6-augustus-gene-150.0-mRNA-1  | NA | NA       |               | Os08g0230450 |                          |                                                                   |
| maker-6-augustus-gene-16.0-mRNA-1   | NA | NA       |               | Os06g0129800 | OsR498G0611561500.01.T02 | Putative pre-mRNA-splicing factor CWC22-like                      |
| maker-6-augustus-gene-16.11-mRNA-1  | NA | NA       |               | Os06g0130400 | OsR498G0611564900.01.T01 | Similar to aminotransferase                                       |
| maker-6-augustus-gene-16.13-mRNA-1  | NA | Indica   |               | Os06g0130500 | OsR498G0611565100.01.T01 | Peptidyl-prolyl cis-trans isomerase                               |
| maker-6-augustus-gene-16.15-mRNA-1  | NA | NA       |               | Os06g0131100 | OsR498G0611566100.01.T03 | Protein DECREASED SIZE EXCLUSION LIMIT 1                          |
| maker-6-augustus-gene-16.21-mRNA-1  | NA | NA       |               | Os06g0129900 | OsR498G0611561800.01.T01 | Cytochrome P450 family 704 subfamily A polypeptide 2              |
| maker-6-augustus-gene-16.27-mRNA-1  | NA | NA       |               |              |                          | Cell cycle regulated microtubule associated protein               |
| maker-6-augustus-gene-16.31-mRNA-1  | NA | NA       |               | Os06g0130800 | OsR498G0611565600.01.T02 | H15 domain-containing protein                                     |
| maker-6-augustus-gene-16.33-mRNA-1  | NA | NA       |               | Os06g0130900 | OsR498G0611565400.01.T03 | Histone domain-containing protein (Fragment)                      |
| maker-6-augustus-gene-16.4-mRNA-1   | NA | NA       |               | Os06g0130000 | OsR498G0611562300.01.T06 | Spastin                                                           |
| maker-6-augustus-gene-16.8-mRNA-1   | NA | NA       | Kinase-LRR-TM | Os06g0130100 | OsR498G0611562900.01.T01 | LRR receptor-like serine/threonine-protein kinase ERECTA          |
| maker-6-augustus-gene-166.25-mRNA-1 | NA | NA       |               |              |                          | Ubiquitin-like-specific protease 1D                               |
| maker-6-augustus-gene-17.31-mRNA-1  | NA | NA       |               | Os06g0131500 | OsR498G0611572100.01.T01 | Glucan endo-1,3-beta-D-glucosidase                                |
| maker-6-augustus-gene-17.33-mRNA-1  | NA | NA       |               | Os06g0133000 | OsR498G0611577100.01.T01 | Granule-bound starch synthase 1, chloroplastic/amyloplastic       |
| maker-6-augustus-gene-17.36-mRNA-1  | NA | Indica   |               | Os06g0131700 | OsR498G0611573000.01.T03 | Secondary wall NAC master switch                                  |
| maker-6-augustus-gene-17.38-mRNA-1  | NA | NA       |               | Os06g0132500 | OsR498G0611575600.01.T01 | Lysophospholipase BODYGUARD 3 like                                |
| maker-6-augustus-gene-17.40-mRNA-1  | NA | Indica   |               | Os06g0132600 | OsR498G0611576400.01.T05 | Damaged DNA binding                                               |
| maker-6-augustus-gene-176.0-mRNA-1  | NA | NA       |               | Os08g0390900 | OsR498G1221160700.01.T01 |                                                                   |
| maker-6-augustus-gene-18.0-mRNA-1   | NA | NA       |               | Os06g0133900 | OsR498G0611582700.01.T01 | 3-phosphoshikimate 1-carboxyvinyltransferase                      |
| maker-6-augustus-gene-18.10-mRNA-1  | NA | Japonica |               | Os06g0134000 | OsR498G1018250900.01.T02 | Ribosomal protein S20                                             |
| maker-6-augustus-gene-18.12-mRNA-1  | NA | NA       |               | Os06g0134050 | OsR498G0611583000.01.T04 | 2'-phosphotransferase                                             |

|                                     |    |          |               |              |                          |                                                                       |
|-------------------------------------|----|----------|---------------|--------------|--------------------------|-----------------------------------------------------------------------|
| maker-6-augustus-gene-18.16-mRNA-1  | NA | NA       |               | Os06g0134300 | OsR498G0611584400.01.T01 |                                                                       |
| maker-6-augustus-gene-18.19-mRNA-1  | NA | Indica   |               | Os06g0134400 | OsR498G0611584800.01.T02 |                                                                       |
| maker-6-augustus-gene-18.22-mRNA-1  | NA | Indica   |               | Os06g0134500 | OsR498G0611585200.01.T03 | 2'-phosphotransferase                                                 |
| maker-6-augustus-gene-18.26-mRNA-1  | NA | NA       |               | Os06g0134500 | OsR498G0611585600.01.T01 | 2'-phosphotransferase                                                 |
| maker-6-augustus-gene-18.29-mRNA-1  | NA | NA       |               | Os06g0134800 | OsR498G0611586600.01.T01 | Glycine cleavage T-protein family                                     |
| maker-6-augustus-gene-18.32-mRNA-1  | NA | NA       |               | Os06g0134900 | OsR498G0611586800.01.T02 | Glycine-rich protein-like                                             |
| maker-6-augustus-gene-18.4-mRNA-1   | NA | NA       | Kinase-LRR-TM | Os06g0134700 | OsR498G0611585900.01.T01 | Somatic embryogenesis receptor kinase 4                               |
| maker-6-augustus-gene-18.6-mRNA-1   | NA | NA       |               | Os06g0133800 | OsR498G0611582200.01.T01 | Transketolase                                                         |
| maker-6-augustus-gene-184.24-mRNA-1 | NA | NA       |               | Os06g0512700 | OsR498G0612611600.01.T01 | Leaf-specific thionin                                                 |
| maker-6-augustus-gene-184.25-mRNA-1 | NA | NA       |               | Os06g0514800 | OsR498G0612604400.01.T01 | Thionin                                                               |
| maker-6-augustus-gene-185.36-mRNA-1 | NA | NA       |               | Os06g0513862 | OsR498G0612611600.01.T01 | Thionin                                                               |
| maker-6-augustus-gene-185.38-mRNA-1 | NA | NA       |               | Os06g0513862 | OsR498G0612611600.01.T01 | Thionin                                                               |
| maker-6-augustus-gene-185.40-mRNA-1 | NA | NA       |               | Os06g0513943 | OsR498G0612611600.01.T01 | Thionin                                                               |
| maker-6-augustus-gene-186.22-mRNA-1 | NA | NA       |               | 0            | OsR498G1120154400.01.T01 |                                                                       |
| maker-6-augustus-gene-187.0-mRNA-1  | NA | NA       |               | Os06g0514100 | OsR498G0612604400.01.T01 | Thionin                                                               |
| maker-6-augustus-gene-19.0-mRNA-1   | NA | NA       |               | Os06g0136300 |                          |                                                                       |
| maker-6-augustus-gene-19.12-mRNA-1  | NA | NA       |               | Os06g0136800 | OsR498G0611589100.01.T01 | ATP-dependent Clp protease proteolytic subunit                        |
| maker-6-augustus-gene-19.2-mRNA-1   | NA | NA       |               | 0            | OsR498G0611588500.01.T03 | Cornichon                                                             |
| maker-6-augustus-gene-19.32-mRNA-1  | NA | NA       |               | Os06g0136000 | OsR498G0611587800.01.T01 | Hypersensitive-induced response protein 4                             |
| maker-6-augustus-gene-19.35-mRNA-1  | NA | NA       |               | Os06g0136100 | OsR498G0611588000.01.T02 |                                                                       |
| maker-6-augustus-gene-19.39-mRNA-1  | NA | NA       |               | Os06g0136600 | OsR498G0611588800.01.T01 | Phosphopyruvate hydratase                                             |
| maker-6-augustus-gene-19.7-mRNA-1   | NA | NA       |               | Os06g0136700 | OsR498G0611588900.01.T07 | WASH complex subunit 7                                                |
| maker-6-augustus-gene-190.32-mRNA-1 | NA | Indica   |               | Os03g0730500 | OsR498G0612627900.01.T01 | Serine carboxypeptidase-like protein 6                                |
| maker-6-augustus-gene-190.33-mRNA-1 | NA | NA       |               |              |                          | Serine carboxypeptidase family protein, expressed                     |
| maker-6-augustus-gene-194.45-mRNA-1 | NA | Indica   |               | Os06g0527800 | OsR498G0612651400.01.T01 | Absciscic acid receptor PYL 8                                         |
| maker-6-augustus-gene-194.47-mRNA-1 | NA | Japonica |               | Os06g0526466 | OsR498G0612651400.01.T01 | Absciscic acid receptor PYL 8                                         |
| maker-6-augustus-gene-194.49-mRNA-1 | NA | Indica   |               | Os01g0618400 | OsR498G0612663800.01.T01 | DEAD-box ATP-dependent RNA helicase 31                                |
| maker-6-augustus-gene-194.52-mRNA-1 | NA | Indica   |               | Os06g0526700 | OsR498G0612664000.01.T02 | PPM-type phosphatase domain-containing protein                        |
| maker-6-augustus-gene-195.0-mRNA-1  | NA | NA       |               | Os06g0527100 | OsR498G0612664900.01.T01 | Cyclic nucleotide-gated ion channel 1                                 |
| maker-6-augustus-gene-195.18-mRNA-1 | NA | Indica   |               | Os06g0526800 | OsR498G0612664400.01.T03 | Protein-serine/threonine phosphatase                                  |
| maker-6-augustus-gene-195.22-mRNA-1 | NA | NA       |               | Os06g0527800 |                          | Bet v I allergen-like                                                 |
| maker-6-augustus-gene-195.5-mRNA-1  | NA | NA       |               | Os06g0527100 | OsR498G0612666700.01.T02 | Cyclic nucleotide-gated calmodulin-binding ion channel                |
| maker-6-augustus-gene-196.25-mRNA-1 | NA | NA       |               |              |                          | E3 ubiquitin-protein ligase UBR7                                      |
| maker-6-augustus-gene-197.10-mRNA-1 | NA | Indica   |               | Os06g0531200 | OsR498G0612678800.01.T01 | Class I glutamine amidotransferase-like superfamily protein isoform 1 |
| maker-6-augustus-gene-197.7-mRNA-1  | NA | Indica   |               | Os06g0530400 | OsR498G0612675000.01.T02 | NAC domain-containing protein 76                                      |
| maker-6-augustus-gene-20.0-mRNA-1   | NA | NA       |               | Os06g0137300 | OsR498G0611593100.01.T01 | Transcription initiation factor TFIID subunit 14b                     |
| maker-6-augustus-gene-20.13-mRNA-1  | NA | NA       |               | Os06g0138200 | OsR498G0611595300.01.T01 | RNA demethylase ALKBH5 isoform A                                      |
| maker-6-augustus-gene-20.18-mRNA-1  | NA | NA       |               | Os06g0139700 | OsR498G0611599100.01.T02 | Coiled-coil domain-containing protein 97                              |
| maker-6-augustus-gene-20.22-mRNA-1  | NA | NA       |               | 0            | OsR498G0611592000.01.T01 | Kinesin-like protein KIN-UB                                           |
| maker-6-augustus-gene-20.32-mRNA-1  | NA | NA       |               |              |                          | Ribosomal RNA processing Brix domain protein isoform 2                |
| maker-6-augustus-gene-20.36-mRNA-1  | NA | NA       |               | Os06g0138100 | OsR498G0611595200.01.T01 | Protein-methionine-S-oxide reductase                                  |
| maker-6-augustus-gene-20.38-mRNA-1  | NA | NA       |               | Os06g0139000 | OsR498G0611597400.01.T01 | FBD domain-containing protein                                         |
| maker-6-augustus-gene-20.41-mRNA-1  | NA | NA       |               | Os06g0139900 | OsR498G0611599800.01.T01 | Proteasome endopeptidase complex                                      |
| maker-6-augustus-gene-20.5-mRNA-1   | NA | NA       |               | Os06g0137600 | OsR498G0611594100.01.T05 | RBFA domain-containing protein                                        |
| maker-6-augustus-gene-20.7-mRNA-1   | NA | NA       |               | 0            | OsR498G0611594900.01.T05 | Global transcription factor group isoform 1                           |
| maker-6-augustus-gene-201.0-mRNA-1  | NA | NA       |               | Os06g0538000 | OsR498G0612698700.01.T01 | T-complex protein 1 subunit gamma                                     |
| maker-6-augustus-gene-201.7-mRNA-1  | NA | NA       |               | Os06g0537700 | OsR498G0612698000.01.T01 | X8 domain-containing protein (Fragment)                               |
| maker-6-augustus-gene-202.48-mRNA-1 | NA | Indica   |               | Os02g0244600 | OsR498G0612706500.01.T01 | Polyadenylate-binding protein-interacting protein 8-like              |
| maker-6-augustus-gene-202.53-mRNA-1 | NA | NA       |               | Os06g0542200 | OsR498G0612707100.01.T02 | Prephenate dehydrogenase                                              |
| maker-6-augustus-gene-202.57-mRNA-1 | NA | NA       |               | Os06g0542300 | OsR498G0612707400.01.T01 | HMA domain-containing protein (Fragment)                              |
| maker-6-augustus-gene-202.59-mRNA-1 | NA | NA       |               | Os08g0514800 |                          | Ptita/En/Spm family plant transposase                                 |
| maker-6-augustus-gene-203.24-mRNA-1 | NA | NA       | Kinase-LRR-TM | 0            | OsR498G0612714500.01.T01 | Calmodulin-binding receptor kinase CaMRLK                             |
| maker-6-augustus-gene-203.26-mRNA-1 | NA | NA       |               | Os06g0543200 | OsR498G0612711400.01.T01 | HTH myb-type domain-containing protein                                |
| maker-6-augustus-gene-204.29-mRNA-1 | NA | Indica   |               | Os06g0545400 | OsR498G0612716800.01.T01 | Exopolysaccharuronase                                                 |
| maker-6-augustus-gene-204.31-mRNA-1 | NA | NA       |               | Os06g0545400 | OsR498G0612717800.01.T01 | Group 13 grass pollen allergen (Fragment)                             |
| maker-6-augustus-gene-205.38-mRNA-1 | NA | NA       |               | 0            | OsR498G0612718500.01.T01 | Large subunit ribosomal protein L1                                    |
| maker-6-augustus-gene-205.44-mRNA-1 | NA | NA       |               | Os06g0545900 | OsR498G0612718200.01.T02 | O-fucosyltransferase family protein (Fragment)                        |
| maker-6-augustus-gene-205.50-mRNA-1 | NA | NA       |               | Os06g0546500 | OsR498G0612719200.01.T01 | Peroxidase                                                            |
| maker-6-augustus-gene-205.55-mRNA-1 | NA | NA       |               | Os06g0547400 | OsR498G0612720400.01.T01 | Peroxidase                                                            |
| maker-6-augustus-gene-205.57-mRNA-1 | NA | NA       |               | Os06g0547400 | OsR498G0612720400.01.T01 | Peroxidase                                                            |
| maker-6-augustus-gene-206.0-mRNA-1  | NA | NA       | Kinase-TM     | Os06g0547900 | OsR498G0612721100.01.T02 | Non-specific serine/threonine protein kinase                          |

|                                     |    |          |               |              |                          |                                                                        |
|-------------------------------------|----|----------|---------------|--------------|--------------------------|------------------------------------------------------------------------|
| maker-6-augustus-gene-206.5-mRNA-1  | NA | NA       |               | Os06g0548000 | OsR498G0612721600.01.T02 | Aspartate aminotransferase                                             |
| maker-6-augustus-gene-207.46-mRNA-1 | NA | NA       |               | 0            | OsR498G0612725800.01.T06 |                                                                        |
| maker-6-augustus-gene-207.48-mRNA-1 | NA | NA       |               | Os06g0550000 | OsR498G0612727000.01.T01 | 60S ribosomal protein L11                                              |
| maker-6-augustus-gene-207.52-mRNA-1 | NA | NA       |               | Os03g0394800 | OsR498G0306103900.01.T01 |                                                                        |
| maker-6-augustus-gene-207.54-mRNA-1 | NA | NA       |               | Os06g0551400 | OsR498G0612730000.01.T01 | Ras protein RIC2                                                       |
| maker-6-augustus-gene-21.0-mRNA-1   | NA | NA       |               | Os06g0140400 | OsR498G0611601500.01.T02 | Homeobox-leucine zipper protein HOX28                                  |
| maker-6-augustus-gene-21.14-mRNA-1  | NA | NA       |               | Os06g0141000 | OsR498G0611603000.01.T01 | Hexose transporter                                                     |
| maker-6-augustus-gene-21.16-mRNA-1  | NA | NA       |               | Os06g0141100 | OsR498G0611603400.01.T01 | Nudix hydrolase                                                        |
| maker-6-augustus-gene-21.2-mRNA-1   | NA | Indica   |               | Os06g0142000 | OsR498G0611605700.01.T04 | Trypsin-like peptidase/ribosome biogenesis regulatory domain protein 1 |
| maker-6-augustus-gene-21.20-mRNA-1  | NA | NA       |               | Os06g0141200 | OsR498G0611603800.01.T01 | TATA-binding protein-associated factor 2N isoform X2                   |
| maker-6-augustus-gene-21.22-mRNA-1  | NA | NA       |               | Os06g0141400 | OsR498G0611604200.01.T02 | Early nodulin 93                                                       |
| maker-6-augustus-gene-21.25-mRNA-1  | NA | NA       |               | Os06g0142350 | OsR498G0611604400.01.T01 | Early nodulin                                                          |
| maker-6-augustus-gene-21.27-mRNA-1  | NA | NA       |               | Os06g0141700 | OsR498G0611604600.01.T01 | Early nodulin                                                          |
| maker-6-augustus-gene-21.4-mRNA-1   | NA | NA       |               | Os06g0140100 | OsR498G0611600400.01.T03 | Leucine carboxyl methyltransferase 1 homolog                           |
| maker-6-augustus-gene-21.9-mRNA-1   | NA | NA       | CC-Kinase-TM  | Os06g0140800 | OsR498G0611602200.01.T02 | E3 ubiquitin ligase                                                    |
| maker-6-augustus-gene-213.8-mRNA-1  | NA | NA       |               | Os06g0561200 | OsR498G0612768900.01.T01 | K <sup>+</sup> efflux antiporter 4                                     |
| maker-6-augustus-gene-214.25-mRNA-1 | NA | NA       |               | Os06g0561800 |                          | ATP-binding cassette sub-family C member 8                             |
| maker-6-augustus-gene-214.29-mRNA-1 | NA | NA       |               | Os06g0562300 |                          | Homeobox domain-containing protein (Fragment)                          |
| maker-6-augustus-gene-216.32-mRNA-1 | NA | NA       |               | 0            | OsR498G0407890700.01.T01 |                                                                        |
| maker-6-augustus-gene-216.35-mRNA-1 | NA | NA       |               | 0            | OsR498G0102498700.01.T01 |                                                                        |
| maker-6-augustus-gene-216.54-mRNA-1 | NA | NA       |               | 0            | OsR498G0612792100.01.T02 | Zinc transporter 4, chloroplastic                                      |
| maker-6-augustus-gene-216.59-mRNA-1 | NA | Indica   |               | Os03g0180700 | OsR498G0612787000.01.T03 | UDP-glycosyltransferase TURAN                                          |
| maker-6-augustus-gene-22.1-mRNA-1   | NA | NA       |               | Os06g0142100 | OsR498G0611605700.01.T03 | FBD domain-containing protein                                          |
| maker-6-augustus-gene-22.12-mRNA-1  | NA | NA       |               | Os06g0143400 | OsR498G0611610100.01.T02 | Acyl-[acyl-carrier-protein] hydrolase                                  |
| maker-6-augustus-gene-22.16-mRNA-1  | NA | NA       |               | Os06g0142200 | OsR498G0611606000.01.T02 | Early nodulin                                                          |
| maker-6-augustus-gene-22.19-mRNA-1  | NA | NA       |               | Os06g0142300 | OsR498G0611606400.01.T01 | Early nodulin                                                          |
| maker-6-augustus-gene-22.22-mRNA-1  | NA | Japonica |               | Os06g0142350 | OsR498G0611606600.01.T01 | Early nodulin                                                          |
| maker-6-augustus-gene-22.25-mRNA-1  | NA | NA       |               | Os06g0142400 | OsR498G0611606800.01.T01 | Early nodulin                                                          |
| maker-6-augustus-gene-22.27-mRNA-1  | NA | Indica   |               | Os06g0142600 | OsR498G0611607800.01.T01 | Early flowering protein 3                                              |
| maker-6-augustus-gene-22.3-mRNA-1   | NA | NA       | Kinase-TM     | Os06g0142500 |                          | Wall-associated receptor kinase 3                                      |
| maker-6-augustus-gene-22.31-mRNA-1  | NA | NA       |               | Os06g0142700 | OsR498G0611608400.01.T01 | Cytochrome c oxidase subunit Vb                                        |
| maker-6-augustus-gene-22.36-mRNA-1  | NA | Indica   |               | Os06g0142900 | OsR498G0611608800.01.T01 | 1-deoxy-D-xylulose-5-phosphate synthase                                |
| maker-6-augustus-gene-22.43-mRNA-1  | NA | NA       |               | 0            | OsR498G0611610800.01.T01 | Pre-mRNA-splicing factor 38                                            |
| maker-6-augustus-gene-22.5-mRNA-1   | NA | NA       |               | Os06g0142800 | OsR498G0611608500.01.T01 | Arginine methyltransferase 10 isoform 2                                |
| maker-6-augustus-gene-22.8-mRNA-1   | NA | NA       |               | Os06g0143000 | OsR498G0611608900.01.T01 | Iron superoxide dismutase                                              |
| maker-6-augustus-gene-223.32-mRNA-1 | NA | NA       |               | Os06g0576900 | OsR498G0612827900.01.T01 | von Willebrand factor type A domain-like                               |
| maker-6-augustus-gene-223.38-mRNA-1 | NA | NA       |               | 0            | OsR498G0612829700.01.T01 |                                                                        |
| maker-6-augustus-gene-224.21-mRNA-1 | NA | NA       |               | Os06g0581300 | OsR498G0612834500.01.T01 | Phospho-N-acetylmuramoyl-pentapeptide-transferase                      |
| maker-6-augustus-gene-224.26-mRNA-1 | NA | NA       |               | Os06g0581000 | OsR498G0612832000.01.T01 | Nitrate transporter 1.2                                                |
| maker-6-augustus-gene-225.34-mRNA-1 | NA | Indica   | Kinase-LRR-TM | Os12g0498650 | OsR498G0612836400.01.T01 | Putative LRR receptor-like serine/threonine-protein kinase             |
| maker-6-augustus-gene-225.39-mRNA-1 | NA | NA       |               | Os06g0583400 | OsR498G0612840200.01.T03 | Histone deacetylase                                                    |
| maker-6-augustus-gene-228.0-mRNA-1  | NA | Japonica | Kinase-LRR-TM | Os06g0586150 | OsR498G0612846900.01.T01 | Putative LRR receptor-like serine/threonine-protein kinase             |
| maker-6-augustus-gene-228.13-mRNA-1 | NA | NA       |               |              |                          |                                                                        |
| maker-6-augustus-gene-228.6-mRNA-1  | NA | Indica   | Kinase-LRR-TM | Os06g0586150 | OsR498G0612847900.01.T01 | Leucine-rich repeat protein kinase family protein                      |
| maker-6-augustus-gene-229.0-mRNA-1  | NA | NA       | Kinase-LRR-TM | 0            | OsR498G0612851100.01.T02 | Leucine-rich repeat protein kinase family protein                      |
| maker-6-augustus-gene-23.27-mRNA-1  | NA | NA       |               | Os06g0144000 | OsR498G0611613700.01.T02 | BRCT domain-containing DNA repair protein (Fragment)                   |
| maker-6-augustus-gene-23.31-mRNA-1  | NA | NA       |               | Os06g0144900 | OsR498G0611616300.01.T01 | Pectate lyase                                                          |
| maker-6-augustus-gene-23.33-mRNA-1  | NA | NA       |               | Os06g0144200 | OsR498G0611614200.01.T01 | Pectate lyase                                                          |
| maker-6-augustus-gene-23.35-mRNA-1  | NA | NA       |               | 0            | OsR498G0611617700.01.T02 | Anthocyanin 5-aromatic acyltransferase-like                            |
| maker-6-augustus-gene-23.37-mRNA-1  | NA | NA       |               | Os06g0145600 | OsR498G0611617900.01.T01 | Anthocyanidin 3-O-glucoside 6"-O-acyltransferase                       |
| maker-6-augustus-gene-23.43-mRNA-1  | NA | NA       |               | Os06g0143900 | OsR498G0611613600.01.T05 | Coatomer subunit beta'                                                 |
| maker-6-augustus-gene-23.47-mRNA-1  | NA | NA       |               | Os06g0144200 | OsR498G0611614200.01.T01 | Pectate lyase                                                          |
| maker-6-augustus-gene-23.49-mRNA-1  | NA | NA       |               | 0            | OsR498G0611616000.01.T01 | Putative metallopeptidase D                                            |
| maker-6-augustus-gene-23.56-mRNA-1  | NA | NA       |               | Os06g0144800 | OsR498G0611616200.01.T03 | Translation factor GUF1 homolog, mitochondrial                         |
| maker-6-augustus-gene-23.61-mRNA-1  | NA | NA       |               | 0            | OsR498G0611618800.01.T01 | AP2-like ethylene-responsive transcription factor At1g79700            |
| maker-6-augustus-gene-230.0-mRNA-1  | NA | NA       | Kinase-LRR-TM |              |                          | Protein kinase domain-containing protein (Fragment)                    |
| maker-6-augustus-gene-230.2-mRNA-1  | NA | Indica   | Kinase-LRR-TM | Os06g0587500 | OsR498G0612852500.01.T01 | Putative LRR receptor-like serine/threonine-protein kinase             |
| maker-6-augustus-gene-230.6-mRNA-1  | NA | Indica   |               | Os06g0587300 | OsR498G0612852800.01.T02 |                                                                        |
| maker-6-augustus-gene-231.7-mRNA-1  | NA | Indica   | Kinase-LRR-TM | Os06g0587900 | OsR498G0612839000.01.T02 | Putative LRR receptor-like serine/threonine-protein kinase             |
| maker-6-augustus-gene-232.54-mRNA-1 | NA | NA       |               | Os06g0590500 | OsR498G0612863300.01.T01 | t-SNARE coiled-coil homology domain-containing protein (Fragment)      |
| maker-6-augustus-gene-232.56-mRNA-1 | NA | NA       |               | Os06g0591200 |                          |                                                                        |



|                                     |    |          |           |              |                          |                                                             |
|-------------------------------------|----|----------|-----------|--------------|--------------------------|-------------------------------------------------------------|
| maker-6-augustus-gene-232.62-mRNA-1 | NA | NA       |           | Os06g0590600 | OsR498G0612863600.01.T01 | Glucan endo-1,3-beta-D-glucosidase                          |
| maker-6-augustus-gene-235.25-mRNA-1 | NA | Indica   |           | Os06g0596300 | OsR498G0612879900.01.T01 | Acyl-[acyl-carrier-protein] hydrolase                       |
| maker-6-augustus-gene-235.34-mRNA-1 | NA | Indica   |           | Os06g0595900 | OsR498G0612878800.01.T01 | TFIIS central domain-containing protein                     |
| maker-6-augustus-gene-236.36-mRNA-1 | NA | Indica   |           | Os06g0597400 | OsR498G0612883100.01.T02 | Exonuclease/helicase-like                                   |
| maker-6-augustus-gene-236.43-mRNA-1 | NA | NA       |           | Os06g0597600 | OsR498G0612883500.01.T01 | FscO                                                        |
| maker-6-augustus-gene-236.44-mRNA-1 | NA | NA       |           | Os06g0597600 | OsR498G0612883500.01.T01 | FscO                                                        |
| maker-6-augustus-gene-237.23-mRNA-1 | NA | NA       |           | Os06g0600100 | OsR498G0612887100.01.T01 | 26S proteasome regulatory particle triple-A ATPase subunit6 |
| maker-6-augustus-gene-24.42-mRNA-1  | NA | Indica   |           | Os06g0145800 | OsR498G0611619500.01.T01 | Single-stranded DNA-binding protein WHY1, chloroplastic     |
| maker-6-augustus-gene-24.47-mRNA-1  | NA | NA       | NBS-TM    | Os06g0146100 | OsR498G0611619900.01.T05 | NBS-LRR type R protein Pizh-1                               |
| maker-6-augustus-gene-24.49-mRNA-1  | NA | NA       |           | 0            | OsR498G0611620900.01.T01 | DNA-binding WRKY                                            |
| maker-6-augustus-gene-24.51-mRNA-1  | NA | Indica   |           | Os06g0146300 | OsR498G0611621200.01.T02 | DUF1995 domain-containing protein (Fragment)                |
| maker-6-augustus-gene-24.58-mRNA-1  | NA | NA       |           | Os06g0146400 | OsR498G0611621400.01.T02 | Iron-sulfur assembly protein IscA chloroplastic             |
| maker-6-augustus-gene-24.61-mRNA-1  | NA | NA       | Kinase-TM | 0            | OsR498G0611626200.01.T05 | Mitogen-activated protein kinase kinase                     |
| maker-6-augustus-gene-242.57-mRNA-1 | NA | NA       |           | Os06g0607300 |                          | HGWP repeat containing protein-like                         |
| maker-6-augustus-gene-249.63-mRNA-1 | NA | Japonica | LRR-TM    | Os06g0621500 | OsR498G0612965800.01.T01 | NAF domain-containing protein                               |
| maker-6-augustus-gene-25.0-mRNA-1   | NA | NA       |           | Os06g0148200 | OsR498G0611627300.01.T03 | GDSL esterase/lipase APG                                    |
| maker-6-augustus-gene-25.13-mRNA-1  | NA | Indica   |           | Os06g0148000 | OsR498G0611626600.01.T01 | Nuclear speckle RNA-binding protein A                       |
| maker-6-augustus-gene-25.18-mRNA-1  | NA | NA       |           | 0            | OsR498G0611631000.01.T07 |                                                             |
| maker-6-augustus-gene-25.21-mRNA-1  | NA | NA       |           |              |                          | Transmembrane protein, putative                             |
| maker-6-augustus-gene-25.3-mRNA-1   | NA | Indica   |           | Os06g0149100 | OsR498G0611630700.01.T01 | GDSL esterase/lipase APG                                    |
| maker-6-augustus-gene-25.8-mRNA-1   | NA | NA       |           | Os06g0149400 | OsR498G0611631300.01.T03 | Nucleosome assembly protein like                            |
| maker-6-augustus-gene-250.55-mRNA-1 | NA | NA       |           | 0            | OsR498G0612969400.01.T05 | Cell division cycle protein B                               |
| maker-6-augustus-gene-252.13-mRNA-1 | NA | NA       |           | Os06g0625900 | OsR498G0612983000.01.T01 | Potassium transporter                                       |
| maker-6-augustus-gene-252.7-mRNA-1  | NA | NA       |           | Os06g0625400 | OsR498G0612981000.01.T05 | Stromal processing peptidase chloroplastic                  |
| maker-6-augustus-gene-254.0-mRNA-1  | NA | Japonica | Kinase-TM | Os06g0620200 | OsR498G0612965100.01.T01 | Non-specific serine/threonine protein kinase                |
| maker-6-augustus-gene-254.6-mRNA-1  | NA | NA       |           |              |                          | Cell division cycle protein B                               |
| maker-6-augustus-gene-254.9-mRNA-1  | NA | NA       |           | Os05g0400100 | OsR498G0510794300.01.T01 | DLH domain-containing protein (Fragment)                    |
| maker-6-augustus-gene-256.0-mRNA-1  | NA | NA       |           | Os02g0517900 | OsR498G0203939000.01.T03 |                                                             |
| maker-6-augustus-gene-256.6-mRNA-1  | NA | NA       |           | Os05g0471800 |                          | Far-red impaired response protein-like                      |
| maker-6-augustus-gene-258.44-mRNA-1 | NA | NA       |           | 0            | OsR498G0613013000.01.T01 | Putative B3 domain-containing protein (Fragment)            |
| maker-6-augustus-gene-26.37-mRNA-1  | NA | NA       |           | Os03g0193900 | OsR498G0101213400.01.T05 | SERPIN domain-containing protein                            |
| maker-6-augustus-gene-26.39-mRNA-1  | NA | NA       |           | Os06g0149500 | OsR498G0611631700.01.T02 | Cysteine synthase, mitochondrial                            |
| maker-6-augustus-gene-26.41-mRNA-1  | NA | NA       |           | Os06g0149700 | OsR498G0611632100.01.T01 | PALP domain-containing protein                              |
| maker-6-augustus-gene-26.45-mRNA-1  | NA | NA       |           | Os06g0149900 | OsR498G0611632500.01.T02 | PALP domain-containing protein                              |
| maker-6-augustus-gene-26.49-mRNA-1  | NA | NA       |           | 0            | OsR498G0611632700.01.T01 | Pollen-specific protein                                     |
| maker-6-augustus-gene-26.51-mRNA-1  | NA | NA       |           | Os03g0193900 |                          |                                                             |
| maker-6-augustus-gene-26.53-mRNA-1  | NA | NA       |           | Os06g0150100 | OsR498G0611633000.01.T01 | BRISC and BRCA1-A complex member 1                          |
| maker-6-augustus-gene-262.48-mRNA-1 | NA | NA       |           | Os06g0640800 | OsR498G0613039900.01.T01 | Premnaspirodiene oxygenase                                  |
| maker-6-augustus-gene-262.49-mRNA-1 | NA | NA       |           | Os06g0641500 | OsR498G0613041700.01.T02 | Ent-cassadiene C2-hydroxylase                               |
| maker-6-augustus-gene-262.55-mRNA-1 | NA | Indica   |           | Os06g0640800 | OsR498G0613040900.01.T01 | Premnaspirodiene oxygenase                                  |
| maker-6-augustus-gene-262.59-mRNA-1 | NA | Indica   |           | Os11g0635500 | OsR498G0613042000.01.T01 | Cytochrome P450 family protein, expressed                   |
| maker-6-augustus-gene-263.0-mRNA-1  | NA | Indica   |           | Os06g0671300 | OsR498G0613044300.01.T01 | Ent-cassadiene C2-hydroxylase                               |
| maker-6-augustus-gene-263.12-mRNA-1 | NA | NA       |           | Os06g0643000 | OsR498G0613046400.01.T01 | Phox (PX) domain-containing protein                         |
| maker-6-augustus-gene-263.2-mRNA-1  | NA | NA       |           | 0            | OsR498G1120590900.01.T01 | Ent-cassadiene C2-hydroxylase (Fragment)                    |
| maker-6-augustus-gene-263.4-mRNA-1  | NA | Indica   |           | Os02g0186800 | OsR498G0613044600.01.T01 | Premnaspirodiene oxygenase                                  |
| maker-6-augustus-gene-263.6-mRNA-1  | NA | NA       |           | 0            | OsR498G0613044800.01.T01 | CUE domain-containing protein                               |
| maker-6-augustus-gene-263.9-mRNA-1  | NA | NA       |           | Os06g0642900 | OsR498G0613045600.01.T01 | Ubiquitin system component Cue protein                      |
| maker-6-augustus-gene-264.26-mRNA-1 | NA | NA       |           | Os06g0644100 | OsR498G0613050100.01.T01 | ER membrane protein complex subunit 7 like                  |
| maker-6-augustus-gene-264.30-mRNA-1 | NA | NA       |           | Os06g0644200 | OsR498G0613050500.01.T01 | H(+)-exporting diphosphatase                                |
| maker-6-augustus-gene-264.50-mRNA-1 | NA | NA       |           | Os06g0643100 | OsR498G0613046600.01.T01 | Proteasome endopeptidase complex                            |
| maker-6-augustus-gene-264.54-mRNA-1 | NA | NA       |           | Os06g0643600 | OsR498G0613048200.01.T01 | formamidopyrimidine-DNA glycosylase isoform X2              |
| maker-6-augustus-gene-264.58-mRNA-1 | NA | NA       |           | Os06g0643700 | OsR498G0613048600.01.T01 | Heptahelical transmembrane protein 1                        |
| maker-6-augustus-gene-264.61-mRNA-1 | NA | Indica   |           | Os02g0184400 | OsR498G0613048800.01.T01 | UDP-glucose-fructose-phosphate glucosyltransferase          |
| maker-6-augustus-gene-264.75-mRNA-1 | NA | NA       |           | Os06g0643900 | OsR498G0613049800.01.T01 | Purple acid phosphatase                                     |
| maker-6-augustus-gene-265.36-mRNA-1 | NA | NA       |           | 0            | OsR498G0613052100.01.T01 | Transducin family protein / WD-40 repeat family protein     |
| maker-6-augustus-gene-265.39-mRNA-1 | NA | Indica   |           | Os02g0183700 | OsR498G0613053500.01.T02 | Isoleucyl-tRNA synthetase                                   |
| maker-6-augustus-gene-265.47-mRNA-1 | NA | NA       |           | Os06g0644800 | OsR498G0613052600.01.T01 | PRKCSH domain-containing protein (Fragment)                 |
| maker-6-augustus-gene-265.51-mRNA-1 | NA | NA       |           |              |                          |                                                             |
| maker-6-augustus-gene-265.53-mRNA-1 | NA | NA       |           | Os06g0645600 |                          | PLATZ transcription factor family protein                   |
| maker-6-augustus-gene-265.57-mRNA-1 | NA | NA       |           | 0            | OsR498G0613055400.01.T06 | Transcription initiation factor TFIID subunit 1             |
| maker-6-augustus-gene-265.61-mRNA-1 | NA | NA       |           | Os06g0646000 | OsR498G0613055600.01.T01 | Methyltransferase-like                                      |

|                                     |    |          |           |              |                          |                                                                            |
|-------------------------------------|----|----------|-----------|--------------|--------------------------|----------------------------------------------------------------------------|
| maker-6-augustus-gene-266.37-mRNA-1 | NA | NA       | Kinase-TM | 0            | OsR498G0613057100.01.T01 | Trithorax group protein osa-like                                           |
| maker-6-augustus-gene-266.44-mRNA-1 | NA | Japonica |           | Os06g0646500 | OsR498G0613057500.01.T01 | ATP synthase subunit O mitochondrial                                       |
| maker-6-augustus-gene-266.49-mRNA-1 | NA | NA       |           | Os06g0647100 | OsR498G0613059700.01.T01 | 50S ribosomal protein L35, chloroplastic                                   |
| maker-6-augustus-gene-266.55-mRNA-1 | NA | NA       |           | Os06g0646600 | OsR498G0613057800.01.T04 | Knotted 7                                                                  |
| maker-6-augustus-gene-266.58-mRNA-1 | NA | NA       |           | 0            | OsR498G0613058600.01.T02 | BZIP transcription factor (Fragment)                                       |
| maker-6-augustus-gene-266.64-mRNA-1 | NA | NA       |           | 0            | OsR498G0613059200.01.T04 | Homogentisate geranylgeranyltransferase                                    |
| maker-6-augustus-gene-266.70-mRNA-1 | NA | NA       |           | Os06g0647400 | OsR498G0613061000.01.T01 | Lysosomal Pro-X carboxypeptidase                                           |
| maker-6-augustus-gene-266.74-mRNA-1 | NA | NA       |           | Os06g0647900 | OsR498G0613062800.01.T01 |                                                                            |
| maker-6-augustus-gene-266.76-mRNA-1 | NA | NA       |           | Os06g0648500 | OsR498G0613064000.01.T01 | Protein POLAR LOCALIZATION DURING ASYMMETRIC DIVISION AND REDISTR          |
| maker-6-augustus-gene-267.24-mRNA-1 | NA | NA       |           | Os06g0649500 | OsR498G0613067300.01.T02 | Transcription initiation factor TFIIID subunit like                        |
| maker-6-augustus-gene-267.28-mRNA-1 | NA | NA       |           | Os06g0649000 | OsR498G0613065200.01.T01 | WRKY transcription factor                                                  |
| maker-6-augustus-gene-267.30-mRNA-1 | NA | NA       |           | Os06g0649800 | OsR498G0613069400.01.T01 | Putative GMP synthase [glutamine-hydrolyzing]                              |
| maker-6-augustus-gene-267.34-mRNA-1 | NA | NA       |           | Os06g0649900 | OsR498G0613070000.01.T03 | PLD phosphodiesterase domain-containing protein                            |
| maker-6-augustus-gene-267.36-mRNA-1 | NA | NA       |           | 0            | OsR498G0613071000.01.T01 | N-acetyltransferase HLS1                                                   |
| maker-6-augustus-gene-268.16-mRNA-1 | NA | NA       |           | Os06g0650800 | OsR498G0613073200.01.T01 | Magnesium transporter                                                      |
| maker-6-augustus-gene-268.20-mRNA-1 | NA | NA       |           | Os06g0650900 | OsR498G0613074000.01.T01 | J domain-containing protein (Fragment)                                     |
| maker-6-augustus-gene-268.22-mRNA-1 | NA | Indica   |           | Os06g0651000 | OsR498G0613074200.01.T01 | NADPH HC toxin reductase                                                   |
| maker-6-augustus-gene-268.25-mRNA-1 | NA | NA       |           | Os06g0651100 | OsR498G0613074600.01.T01 | NADPH-dependent HC-toxin reductase                                         |
| maker-6-augustus-gene-268.28-mRNA-1 | NA | NA       |           | Os06g0651300 | OsR498G0613075000.01.T01 | Protein-serine/threonine phosphatase                                       |
| maker-6-augustus-gene-268.31-mRNA-1 | NA | NA       |           | Os06g0651600 | OsR498G0613075200.01.T03 | Protein-serine/threonine phosphatase                                       |
| maker-6-augustus-gene-268.36-mRNA-1 | NA | Indica   |           | Os02g0179500 | OsR498G0613076600.01.T01 | Heptahelical transmembrane protein 2                                       |
| maker-6-augustus-gene-268.5-mRNA-1  | NA | NA       |           | Os06g0651200 |                          |                                                                            |
| maker-6-augustus-gene-268.7-mRNA-1  | NA | Indica   |           | Os06g0651900 | OsR498G0613075900.01.T01 | Hydrophobic protein OSR8                                                   |
| maker-6-augustus-gene-268.9-mRNA-1  | NA | NA       |           | Os06g0652000 | OsR498G0613076100.01.T01 | DNA-directed RNA polymerase                                                |
| maker-6-augustus-gene-269.0-mRNA-1  | NA | NA       |           |              |                          | E3 ubiquitin-protein ligase DA2-like isoform X1                            |
| maker-6-augustus-gene-269.11-mRNA-1 | NA | NA       |           | Os06g0654000 | OsR498G0613081600.01.T01 | Ubiquitin-specific protease 19                                             |
| maker-6-augustus-gene-269.2-mRNA-1  | NA | NA       |           | Os06g0652600 | OsR498G0613077700.01.T01 | Fibroin heavy chain-like                                                   |
| maker-6-augustus-gene-269.7-mRNA-1  | NA | Indica   |           | Os09g0425900 | OsR498G0613079700.01.T01 | Tetraspanin/Peripherin                                                     |
| maker-6-augustus-gene-269.9-mRNA-1  | NA | NA       |           | Os06g0653900 | OsR498G0613081200.01.T02 | Protein transport protein subunit gamma                                    |
| maker-6-augustus-gene-27.0-mRNA-1   | NA | NA       |           | Os06g0151600 | OsR498G0611636900.01.T02 | DNA repair-like proteinRadA                                                |
| maker-6-augustus-gene-27.11-mRNA-1  | NA | NA       |           | Os06g0152100 | OsR498G0611638100.01.T01 | Profilin                                                                   |
| maker-6-augustus-gene-27.14-mRNA-1  | NA | NA       |           | Os06g0152200 | OsR498G0611638500.01.T01 | Orphans transcription factor                                               |
| maker-6-augustus-gene-27.17-mRNA-1  | NA | NA       |           | Os06g0152300 | OsR498G0611638700.01.T01 | Ubiquinone biosynthesis O-methyltransferase, mitochondrial                 |
| maker-6-augustus-gene-27.23-mRNA-1  | NA | Indica   |           | Os06g0152400 | OsR498G0611639100.01.T01 | Ubiquinone biosynthesis O-methyltransferase mitochondrial                  |
| maker-6-augustus-gene-27.28-mRNA-1  | NA | NA       |           | Os06g0151200 | OsR498G0611636400.01.T02 | RNA-binding with multiple splicing                                         |
| maker-6-augustus-gene-27.35-mRNA-1  | NA | NA       |           | Os06g0151300 | OsR498G0611636600.01.T04 | Trafficking protein particle complex subunit                               |
| maker-6-augustus-gene-27.39-mRNA-1  | NA | NA       | Kinase-TM | Os06g0151700 | OsR498G0611637200.01.T01 | Protein kinase domain containing protein, expressed                        |
| maker-6-augustus-gene-27.41-mRNA-1  | NA | Indica   |           | Os05g0524400 | OsR498G0611637600.01.T02 | ATP-dependent 6-phosphofructokinase                                        |
| maker-6-augustus-gene-27.6-mRNA-1   | NA | NA       |           | 0            | OsR498G0611637700.01.T05 | Dual specificity phosphatase                                               |
| maker-6-augustus-gene-270.0-mRNA-1  | NA | NA       |           | Os06g0654300 | OsR498G0613083100.01.T01 | Sortase system response regulator                                          |
| maker-6-augustus-gene-270.4-mRNA-1  | NA | NA       | Kinase-TM | Os06g0654500 | OsR498G0613085100.01.T01 | Concanavalin A-like lectin/glucanase domain, Serine/threonine-protein kina |
| maker-6-augustus-gene-270.6-mRNA-1  | NA | NA       |           | 0            | OsR498G0613085400.01.T01 | COLE                                                                       |
| maker-6-augustus-gene-270.8-mRNA-1  | NA | NA       |           | Os06g0655100 | OsR498G0613087000.01.T01 | D-3-phosphoglycerate dehydrogenase                                         |
| maker-6-augustus-gene-271.0-mRNA-1  | NA | NA       |           | Os06g0656000 | OsR498G0613090100.01.T01 | (R)-mandelonitrile lyase-like                                              |
| maker-6-augustus-gene-271.7-mRNA-1  | NA | NA       |           | Os06g0656700 |                          |                                                                            |
| maker-6-augustus-gene-271.9-mRNA-1  | NA | NA       |           | Os06g0656500 | OsR498G0613092000.01.T01 | 4-coumarate coenzyme A ligase                                              |
| maker-6-augustus-gene-272.30-mRNA-1 | NA | NA       |           | Os06g0657500 | OsR498G0613096300.01.T01 | AP2-EREBP transcription factor                                             |
| maker-6-augustus-gene-272.32-mRNA-1 | NA | NA       |           | Os06g0658500 | OsR498G0613099100.01.T02 |                                                                            |
| maker-6-augustus-gene-272.36-mRNA-1 | NA | NA       |           | 0            | OsR498G0613100100.01.T04 | Homogentisate geranylgeranyl transferase                                   |
| maker-6-augustus-gene-272.42-mRNA-1 | NA | NA       |           | Os06g0658300 |                          | Homogentisate geranylgeranyl transferase                                   |
| maker-6-augustus-gene-272.44-mRNA-1 | NA | NA       |           | Os02g0513700 |                          | DUF659 domain-containing protein (Fragment)                                |
| maker-6-augustus-gene-273.27-mRNA-1 | NA | NA       |           | Os06g0659100 | OsR498G0613101300.01.T01 | Squamosa promoter-binding-like protein 5                                   |
| maker-6-augustus-gene-273.32-mRNA-1 | NA | Indica   |           | Os06g0659500 | OsR498G0613103300.01.T01 | Glutaredoxin                                                               |
| maker-6-augustus-gene-273.35-mRNA-1 | NA | NA       |           | Os06g0659300 | OsR498G0613102400.01.T03 | HP domain-containing protein (Fragment)                                    |
| maker-6-augustus-gene-274.0-mRNA-1  | NA | NA       |           | Os06g0660200 | OsR498G0613105900.01.T01 | Auxin efflux carrier component                                             |
| maker-6-augustus-gene-274.13-mRNA-1 | NA | NA       |           | Os06g0661400 | OsR498G0613110700.01.T05 | ANTH domain-containing protein                                             |
| maker-6-augustus-gene-274.18-mRNA-1 | NA | NA       |           | Os06g0661766 | OsR498G0613111500.01.T06 |                                                                            |
| maker-6-augustus-gene-274.2-mRNA-1  | NA | Indica   |           | Os06g0660700 | OsR498G0613108700.01.T03 | UBC core domain-containing protein (Fragment)                              |
| maker-6-augustus-gene-274.20-mRNA-1 | NA | NA       |           | Os06g0660600 |                          | NAM-associated domain-containing protein (Fragment)                        |
| maker-6-augustus-gene-274.23-mRNA-1 | NA | NA       |           | Os06g0661500 | OsR498G0613111000.01.T01 | Serine/threonine-protein kinase STY17                                      |
| maker-6-augustus-gene-274.25-mRNA-1 | NA | Indica   |           | Os06g0661700 | OsR498G0613111400.01.T03 | Rab-GAP TBC domain-containing protein (Fragment)                           |

|                                     |    |          |               |              |                          |                                                                           |
|-------------------------------------|----|----------|---------------|--------------|--------------------------|---------------------------------------------------------------------------|
| maker-6-augustus-gene-274.30-mRNA-1 | NA | NA       |               | Os06g0661800 | OsR498G0613111800.01.T01 | Cryptochrome DASH chloroplastic/mitochondrial                             |
| maker-6-augustus-gene-274.33-mRNA-1 | NA | NA       |               | Os06g0661900 | OsR498G0613112000.01.T04 | Core-2/l-branching beta-16-N-acetylglucosaminyltransferase family protein |
| maker-6-augustus-gene-274.37-mRNA-1 | NA | NA       |               | Os06g0662000 | OsR498G0613112200.01.T01 | V-ATPase 69 kDa subunit                                                   |
| maker-6-augustus-gene-274.6-mRNA-1  | NA | NA       | Kinase-LRR-TM | 0            | OsR498G0613109100.01.T01 | Protein STRUBBELIG-RECEPTOR FAMILY 1                                      |
| maker-6-augustus-gene-275.0-mRNA-1  | NA | NA       | Kinase-TM     | Os06g0663400 | OsR498G0613118900.01.T01 | serine/threonine-protein kinase STY13                                     |
| maker-6-augustus-gene-275.10-mRNA-1 | NA | NA       | Kinase        | Os06g0663200 | OsR498G0613117600.01.T02 | Putative serine/threonine-protein kinase PBL17                            |
| maker-6-augustus-gene-275.15-mRNA-1 | NA | NA       |               | Os06g0663600 | OsR498G0613119800.01.T05 | DUF295 domain-containing protein                                          |
| maker-6-augustus-gene-275.2-mRNA-1  | NA | NA       |               | Os06g0662200 | OsR498G0613112800.01.T01 | Basic leucine zipper 9                                                    |
| maker-6-augustus-gene-275.4-mRNA-1  | NA | NA       | Kinase-LRR-TM | 0            | OsR498G0613116800.01.T01 | Pollen receptor-like kinase 4                                             |
| maker-6-augustus-gene-275.6-mRNA-1  | NA | NA       |               | 0            | OsR498G0613117200.01.T01 | tRNA pseudouridine synthase A                                             |
| maker-6-augustus-gene-276.41-mRNA-1 | NA | NA       | Kinase        | Os06g0663900 | OsR498G0613121100.01.T03 | Receptor-like cytosolic serine/threonine-protein kinase RBK1              |
| maker-6-augustus-gene-276.47-mRNA-1 | NA | NA       |               | Os06g0664300 | OsR498G0613122300.01.T02 | Vacuolar-sorting receptor 6 like                                          |
| maker-6-augustus-gene-276.53-mRNA-1 | NA | NA       |               | Os06g0664800 | OsR498G0613123100.01.T01 | Octamer-binding transcription factor                                      |
| maker-6-augustus-gene-276.55-mRNA-1 | NA | NA       |               | Os06g0665000 | OsR498G0613124300.01.T02 | ALA-interacting subunit                                                   |
| maker-6-augustus-gene-276.58-mRNA-1 | NA | NA       |               | Os06g0663800 | OsR498G0613120200.01.T01 | Peptidylprolyl isomerase                                                  |
| maker-6-augustus-gene-276.63-mRNA-1 | NA | Indica   |               | Os11g0540100 | OsR498G0613121600.01.T01 | Xaa-Pro aminopeptidase P                                                  |
| maker-6-augustus-gene-276.72-mRNA-1 | NA | NA       |               | Os06g0664200 | OsR498G0613121800.01.T02 | D-fructose-1,6-bisphosphate 1-phosphohydrolase                            |
| maker-6-augustus-gene-276.74-mRNA-1 | NA | NA       |               | Os06g0664400 | OsR498G0613123000.01.T01 | Receptor-like protein 12-like                                             |
| maker-6-augustus-gene-276.77-mRNA-1 | NA | NA       |               | Os06g0665100 | OsR498G0613124600.01.T01 | Haloacid dehalogenase/epoxide hydrolase                                   |
| maker-6-augustus-gene-276.79-mRNA-1 | NA | NA       |               | 0            | OsR498G0613125000.01.T01 | X8 domain-containing protein (Fragment)                                   |
| maker-6-augustus-gene-276.81-mRNA-1 | NA | NA       |               | Os06g0665500 | OsR498G0613126200.01.T02 | Allantoate amidohydrolase                                                 |
| maker-6-augustus-gene-277.1-mRNA-1  | NA | NA       |               | Os06g0665900 | OsR498G0613129900.01.T01 | Thiol reductase thioredoxin                                               |
| maker-6-augustus-gene-277.4-mRNA-1  | NA | NA       |               | Os06g0666100 | OsR498G0613130900.01.T02 | B box-type domain-containing protein (Fragment)                           |
| maker-6-augustus-gene-277.8-mRNA-1  | NA | NA       |               |              |                          | Copper-transporting ATPase RAN1                                           |
| maker-6-augustus-gene-278.47-mRNA-1 | NA | NA       |               | Os06g0667200 | OsR498G0613138500.01.T01 | MAD5-box protein ZMM17                                                    |
| maker-6-augustus-gene-278.51-mRNA-1 | NA | Indica   |               | Os03g0322500 | OsR498G0613139300.01.T03 | 14 kDa zinc-binding protein (Fragment)                                    |
| maker-6-augustus-gene-278.56-mRNA-1 | NA | NA       |               | Os06g0666600 | OsR498G0613135200.01.T02 | Glyceraldehyde-3-phosphate dehydrogenase                                  |
| maker-6-augustus-gene-278.60-mRNA-1 | NA | NA       |               | Os11g0205500 | OsR498G1119581200.01.T01 |                                                                           |
| maker-6-augustus-gene-278.62-mRNA-1 | NA | NA       |               | Os06g0667600 | OsR498G0613139600.01.T01 | Glycine cleavage system H protein (Fragment)                              |
| maker-6-augustus-gene-278.65-mRNA-1 | NA | NA       |               | Os06g0668200 | OsR498G0613141000.01.T01 | Phosphoglycerate kinase                                                   |
| maker-6-augustus-gene-279.34-mRNA-1 | NA | Indica   |               | Os06g0669800 | OsR498G0613145900.01.T02 | OTU domain-containing protein                                             |
| maker-6-augustus-gene-279.39-mRNA-1 | NA | NA       |               | 0            | OsR498G0613146300.01.T02 | Molybdenum cofactor sulfurase                                             |
| maker-6-augustus-gene-279.45-mRNA-1 | NA | NA       |               | Os06g0670300 | OsR498G0613148900.01.T01 | HTH myb-type domain-containing protein                                    |
| maker-6-augustus-gene-279.47-mRNA-1 | NA | Indica   |               | Os06g0670500 | OsR498G0613149500.01.T03 | Peptidyl-prolyl cis-trans isomerase                                       |
| maker-6-augustus-gene-279.53-mRNA-1 | NA | NA       |               | Os06g0670500 | OsR498G0613149700.01.T05 | Peptidyl-prolyl cis-trans isomerase                                       |
| maker-6-augustus-gene-279.59-mRNA-1 | NA | NA       |               | 0            | OsR498G0613143800.01.T01 | CRIB domain-containing protein                                            |
| maker-6-augustus-gene-279.61-mRNA-1 | NA | Indica   |               | Os06g0669150 | OsR498G0613144600.01.T02 | BHLH domain-containing protein                                            |
| maker-6-augustus-gene-279.63-mRNA-1 | NA | NA       |               | 0            | OsR498G0613145000.01.T02 | Nucleotidyltransferase family protein isoform 4                           |
| maker-6-augustus-gene-279.71-mRNA-1 | NA | Indica   |               | Os06g0669400 | OsR498G0613145400.01.T05 | ATP-dependent zinc metalloprotease                                        |
| maker-6-augustus-gene-279.75-mRNA-1 | NA | NA       |               | 0            | OsR498G0613145600.01.T01 | Component of oligomeric Golgi complex 7                                   |
| maker-6-augustus-gene-279.80-mRNA-1 | NA | Indica   |               | Os06g0669700 | OsR498G0613145800.01.T01 | HTH myb-type domain-containing protein (Fragment)                         |
| maker-6-augustus-gene-279.86-mRNA-1 | NA | NA       |               | Os06g0670100 | OsR498G0613146600.01.T01 | Dentin sialophosphoprotein-like                                           |
| maker-6-augustus-gene-28.33-mRNA-1  | NA | NA       |               | Os06g0153200 | OsR498G0611641900.01.T07 | Sugar phosphate/phosphate translocator like                               |
| maker-6-augustus-gene-28.38-mRNA-1  | NA | NA       |               | Os06g0152700 | OsR498G0611639800.01.T01 | CAP10 domain-containing protein (Fragment)                                |
| maker-6-augustus-gene-28.40-mRNA-1  | NA | NA       |               | Os06g0152800 |                          |                                                                           |
| maker-6-augustus-gene-28.42-mRNA-1  | NA | Indica   |               | Os06g0125200 | OsR498G0611641600.01.T03 | FLZ-type domain-containing protein (Fragment)                             |
| maker-6-augustus-gene-28.44-mRNA-1  | NA | NA       |               | 0            | OsR498G0611642400.01.T01 | VWFA domain-containing protein                                            |
| maker-6-augustus-gene-28.45-mRNA-1  | NA | NA       |               | 0            | OsR498G0611642400.01.T01 | VWFA domain-containing protein                                            |
| maker-6-augustus-gene-28.48-mRNA-1  | NA | NA       |               | Os06g0153600 | OsR498G0611643000.01.T04 |                                                                           |
| maker-6-augustus-gene-28.51-mRNA-1  | NA | Japonica |               | Os06g0153800 | OsR498G0611642800.01.T03 | Proteasome endopeptidase complex                                          |
| maker-6-augustus-gene-28.55-mRNA-1  | NA | NA       |               | 0            | OsR498G0611643200.01.T08 | Putative thiol methyltransferase 2                                        |
| maker-6-augustus-gene-28.56-mRNA-1  | NA | NA       |               | 0            | OsR498G0611643200.01.T09 | probable thiol methyltransferase 2                                        |
| maker-6-augustus-gene-280.26-mRNA-1 | NA | NA       |               | Os06g0671000 | OsR498G0613151300.01.T04 | Potassium transporter                                                     |
| maker-6-augustus-gene-280.32-mRNA-1 | NA | NA       |               | 0            | OsR498G0613155900.01.T03 | Twinkle like protein, chloroplastic/mitochondrial                         |
| maker-6-augustus-gene-280.37-mRNA-1 | NA | NA       |               | Os06g0671800 | OsR498G0613156100.01.T02 | Patellin-4                                                                |
| maker-6-augustus-gene-280.40-mRNA-1 | NA | Indica   |               | Os06g0671300 | OsR498G0613153800.01.T01 | Ent-isokaurene C2-hydroxylase-like                                        |
| maker-6-augustus-gene-280.42-mRNA-1 | NA | NA       |               | Os06g0671900 | OsR498G0613156400.01.T01 | Tubulin beta chain                                                        |
| maker-6-augustus-gene-281.31-mRNA-1 | NA | NA       |               | 0            | OsR498G0613159800.01.T01 | DUF862 domain-containing protein                                          |
| maker-6-augustus-gene-281.33-mRNA-1 | NA | NA       |               | Os06g0672801 | OsR498G0613160200.01.T01 | DUF862 domain-containing protein                                          |
| maker-6-augustus-gene-281.37-mRNA-1 | NA | NA       |               | Os06g0674000 | OsR498G0613163800.01.T02 |                                                                           |
| maker-6-augustus-gene-281.39-mRNA-1 | NA | Japonica |               | Os06g0674100 | OsR498G0613164400.01.T02 |                                                                           |

|                                     |    |          |           |              |                          |                                                                            |
|-------------------------------------|----|----------|-----------|--------------|--------------------------|----------------------------------------------------------------------------|
| maker-6-augustus-gene-282.0-mRNA-1  | NA | NA       |           | 0            | OsR498G0613164900.01.T06 | BTB domain-containing protein                                              |
| maker-6-augustus-gene-282.10-mRNA-1 | NA | NA       |           | 0            | OsR498G0613167600.01.T04 | Metal transporter Nramp3                                                   |
| maker-6-augustus-gene-282.18-mRNA-1 | NA | NA       | Kinase-TM | Os06g0676600 | OsR498G0613170800.01.T03 | Putative leucine-rich repeat receptor-like serine/threonine-protein kinase |
| maker-6-augustus-gene-282.5-mRNA-1  | NA | NA       |           | Os06g0675600 | OsR498G0613166500.01.T01 | NAC transcription factor 7                                                 |
| maker-6-augustus-gene-282.7-mRNA-1  | NA | NA       |           | Os06g0675700 | OsR498G0613167000.01.T01 | Glycosyl hydrolases family 31 protein                                      |
| maker-6-augustus-gene-283.22-mRNA-1 | NA | NA       |           | Os06g0676700 | OsR498G0613171300.01.T01 | Glycosyl hydrolase family 31 protein                                       |
| maker-6-augustus-gene-283.25-mRNA-1 | NA | NA       |           | Os06g0677300 | OsR498G0613173300.01.T01 | RING-CH-type domain-containing protein (Fragment)                          |
| maker-6-augustus-gene-283.29-mRNA-1 | NA | NA       |           | Os06g0677400 | OsR498G0613173500.01.T04 | 3-hydroxyisobutyrate dehydrogenase                                         |
| maker-6-augustus-gene-283.34-mRNA-1 | NA | NA       | LRR       | Os06g0677500 | OsR498G0613173700.01.T01 | Protein geranylgeranyltransferase type II                                  |
| maker-6-augustus-gene-283.45-mRNA-1 | NA | Japonica |           | Os06g0677000 | OsR498G0613171800.01.T02 | Patatin group A-3                                                          |
| maker-6-augustus-gene-283.47-mRNA-1 | NA | NA       |           | Os06g0677800 | OsR498G0613174400.01.T03 | Auxin response factor                                                      |
| maker-6-augustus-gene-283.52-mRNA-1 | NA | NA       |           | Os06g0678200 | OsR498G0613178200.01.T01 | Geranyl pyrophosphate synthase                                             |
| maker-6-augustus-gene-284.33-mRNA-1 | NA | NA       |           | Os02g0656300 | OsR498G0204447900.01.T01 | Cell division cycle protein 23                                             |
| maker-6-augustus-gene-284.34-mRNA-1 | NA | NA       |           | Os06g0679100 | OsR498G0204447900.01.T01 | anaphase-promoting complex subunit 8                                       |
| maker-6-augustus-gene-284.41-mRNA-1 | NA | NA       |           | Os06g0679500 | OsR498G0613183300.01.T01 | Hexosyltransferase                                                         |
| maker-6-augustus-gene-284.46-mRNA-1 | NA | Indica   |           | Os06g0679800 | OsR498G0613183900.01.T01 | Heat shock protein 16                                                      |
| maker-6-augustus-gene-284.51-mRNA-1 | NA | NA       |           |              |                          | BEACH domain-containing protein lvsC                                       |
| maker-6-augustus-gene-284.56-mRNA-1 | NA | NA       |           | Os06g0678800 | OsR498G0613181000.01.T01 | L-ascorbate oxidase homolog isoform X1                                     |
| maker-6-augustus-gene-284.59-mRNA-1 | NA | NA       |           | Os06g0679400 | OsR498G0613183000.01.T01 | Myb domain protein 101                                                     |
| maker-6-augustus-gene-284.61-mRNA-1 | NA | NA       |           | 0            | OsR498G0613183800.01.T01 | RNI-like superfamily protein isoform 1                                     |
| maker-6-augustus-gene-285.0-mRNA-1  | NA | NA       |           | Os06g0680500 | OsR498G0613191100.01.T03 | Glutamate receptor                                                         |
| maker-6-augustus-gene-285.12-mRNA-1 | NA | Indica   |           | Os11g0599101 | OsR498G0613193200.01.T01 | DUF629 domain-containing protein                                           |
| maker-6-augustus-gene-285.14-mRNA-1 | NA | Japonica |           | Os06g0681100 | OsR498G0613194000.01.T01 | DUF629 domain-containing protein                                           |
| maker-6-augustus-gene-285.16-mRNA-1 | NA | NA       |           | Os06g0681200 | OsR498G0613194400.01.T01 | Phytocyanin domain-containing protein (Fragment)                           |
| maker-6-augustus-gene-285.5-mRNA-1  | NA | NA       |           | 0            | OsR498G0613191300.01.T01 | Cytochrome P450, E-class, group I                                          |
| maker-6-augustus-gene-285.7-mRNA-1  | NA | NA       |           | Os06g0680900 | OsR498G0613192000.01.T01 | Exostosin domain-containing protein                                        |
| maker-6-augustus-gene-285.9-mRNA-1  | NA | NA       |           | 0            | OsR498G0613192000.01.T02 | Glucose-6-phosphate/phosphate translocator 2, chloroplastic                |
| maker-6-augustus-gene-286.0-mRNA-1  | NA | NA       |           | Os06g0681600 | OsR498G0613197300.01.T01 | Peroxidase                                                                 |
| maker-6-augustus-gene-286.13-mRNA-1 | NA | Japonica |           | Os06g0682750 | OsR498G0613199200.01.T01 | SWAP/surp RNA-binding domain-containing protein isoform 2                  |
| maker-6-augustus-gene-286.19-mRNA-1 | NA | NA       |           |              |                          | Zinc finger CCH domain-containing protein 13                               |
| maker-6-augustus-gene-286.25-mRNA-1 | NA | NA       |           | Os06g0682900 | OsR498G0613199600.01.T02 | Protein HEAT-STRESS-ASSOCIATED 32                                          |
| maker-6-augustus-gene-286.3-mRNA-1  | NA | NA       |           | Os06g0681700 | OsR498G0613197700.01.T01 | thiamine-repressible mitochondrial transport protein THI74                 |
| maker-6-augustus-gene-286.31-mRNA-1 | NA | NA       |           | Os06g0683200 | OsR498G0613200400.01.T01 | KOW domain-containing protein                                              |
| maker-6-augustus-gene-286.5-mRNA-1  | NA | NA       |           | Os06g0683000 | OsR498G0613199900.01.T01 | Dihydroflavonol-4-reductase-like isoform X1                                |
| maker-6-augustus-gene-286.7-mRNA-1  | NA | Indica   |           | Os06g0683300 | OsR498G0613200500.01.T05 | Beta-glucosidase 25                                                        |
| maker-6-augustus-gene-287.0-mRNA-1  | NA | NA       |           | 0            | OsR498G0100584200.01.T01 | Retrotransposon protein, putative, Ty3-gypsy sub-class                     |
| maker-6-augustus-gene-287.10-mRNA-1 | NA | NA       |           | Os06g0685700 | OsR498G0613206900.01.T04 | Auxin response factor                                                      |
| maker-6-augustus-gene-287.13-mRNA-1 | NA | NA       |           | Os06g0684000 | OsR498G0613203200.01.T03 |                                                                            |
| maker-6-augustus-gene-287.20-mRNA-1 | NA | NA       |           | 0            | OsR498G0613204600.01.T01 | FBD domain-containing protein                                              |
| maker-6-augustus-gene-287.22-mRNA-1 | NA | NA       |           | Os06g0685200 | OsR498G0613205200.01.T01 |                                                                            |
| maker-6-augustus-gene-288.0-mRNA-1  | NA | NA       |           | 0            | OsR498G1019076900.01.T01 | Retrotransposon protein, putative, unclassified                            |
| maker-6-augustus-gene-289.62-mRNA-1 | NA | NA       |           | Os06g0688500 |                          |                                                                            |
| maker-6-augustus-gene-29.0-mRNA-1   | NA | NA       |           |              |                          | DUF676 domain-containing protein                                           |
| maker-6-augustus-gene-29.11-mRNA-1  | NA | NA       |           | Os06g0155300 | OsR498G0611650500.01.T06 | Calmodulin binding protein, putative                                       |
| maker-6-augustus-gene-29.13-mRNA-1  | NA | NA       |           | Os06g0155600 | OsR498G0611650900.01.T01 | Putative AAA domain-containing protein, R3H                                |
| maker-6-augustus-gene-29.18-mRNA-1  | NA | NA       |           | Os06g0155900 | OsR498G0611651500.01.T01 | LRR receptor-like serine/threonine-protein kinase GSO2                     |
| maker-6-augustus-gene-29.22-mRNA-1  | NA | NA       |           | Os06g0156600 | OsR498G0611653300.01.T01 | GDSL esterase/lipase                                                       |
| maker-6-augustus-gene-29.29-mRNA-1  | NA | NA       |           | Os06g0154500 | OsR498G0611646000.01.T03 | Mitogen-activated protein kinase                                           |
| maker-6-augustus-gene-29.33-mRNA-1  | NA | Japonica |           | Os06g0154600 | OsR498G0917948700.01.T07 | 7,8-dihydroneopterin aldolase                                              |
| maker-6-augustus-gene-29.35-mRNA-1  | NA | NA       |           |              |                          | Glutamate receptor                                                         |
| maker-6-augustus-gene-29.36-mRNA-1  | NA | NA       |           | Os06g0155400 |                          | LRR receptor-like serine/threonine-protein kinase GSO2                     |
| maker-6-augustus-gene-29.37-mRNA-1  | NA | NA       |           | Os06g0155500 | OsR498G0611650800.01.T03 | 3'-N-debenzoyl-2'-deoxytaxol N-benzoyltransferase                          |
| maker-6-augustus-gene-29.42-mRNA-1  | NA | Indica   |           | Os06g0156400 | OsR498G0611652400.01.T01 | Carboxylic ester hydrolase/ hydrolase, acting on ester bonds               |
| maker-6-augustus-gene-29.7-mRNA-1   | NA | NA       |           | 0            | OsR498G0611647900.01.T01 | Putative RING-type E3 ubiquitin ligase                                     |
| maker-6-augustus-gene-293.51-mRNA-1 | NA | NA       |           | Os06g0697000 | OsR498G0613240400.01.T01 | Xyloglucan endotransglucosylase/hydrolase                                  |
| maker-6-augustus-gene-294.41-mRNA-1 | NA | NA       |           | Os06g0698785 | OsR498G0613247300.01.T01 | Choline monooxygenase, chloroplastic                                       |
| maker-6-augustus-gene-294.44-mRNA-1 | NA | NA       |           | 0            | OsR498G0613243800.01.T01 | Homeobox-leucine zipper protein HOX18                                      |
| maker-6-augustus-gene-294.46-mRNA-1 | NA | NA       |           | 0            | OsR498G0613244800.01.T02 | PPM-type phosphatase domain-containing protein                             |
| maker-6-augustus-gene-294.52-mRNA-1 | NA | NA       |           | Os06g0698859 | OsR498G0613248000.01.T01 | Serrate RNA effector molecule                                              |
| maker-6-augustus-gene-294.56-mRNA-1 | NA | Indica   |           | Os02g0148500 | OsR498G0613248200.01.T01 | GATA transcription factor 20                                               |
| maker-6-augustus-gene-295.0-mRNA-1  | NA | NA       |           | Os04g0172400 |                          | Acyl transferase 15                                                        |

|                                     |    |          |               |              |                          |                                                                           |
|-------------------------------------|----|----------|---------------|--------------|--------------------------|---------------------------------------------------------------------------|
| maker-6-augustus-gene-295.16-mRNA-1 | NA | NA       |               | Os06g0699200 | OsR498G0613249000.01.T01 | Purple acid phosphatase 28                                                |
| maker-6-augustus-gene-295.22-mRNA-1 | NA | NA       |               | Os09g0326800 | OsR498G0613251400.01.T02 | 26S proteasome non-ATPase regulatory subunit 2 A                          |
| maker-6-augustus-gene-295.32-mRNA-1 | NA | NA       |               | Os06g0700500 | OsR498G0613253200.01.T05 | Core-2/l-branching beta-16-N-acetylglucosaminyltransferase family protein |
| maker-6-augustus-gene-295.4-mRNA-1  | NA | NA       |               | 0            | OsR498G0613250700.01.T03 | p-aminobenzoic acid synthase                                              |
| maker-6-augustus-gene-295.8-mRNA-1  | NA | NA       |               | 0            | OsR498G0613250900.01.T01 | ENTH domain-containing protein (Fragment)                                 |
| maker-6-augustus-gene-296.21-mRNA-1 | NA | Indica   |               | Os06g0700650 | OsR498G0613253600.01.T02 | Heavy metal transporting P1B-ATPase 2                                     |
| maker-6-augustus-gene-296.25-mRNA-1 | NA | NA       |               | Os06g0701100 | OsR498G0613254600.01.T04 | Translation initiation factor                                             |
| maker-6-augustus-gene-296.27-mRNA-1 | NA | NA       |               | Os06g0701200 | OsR498G0613254800.01.T01 | UDP-N-acetylglucosamine pyrophosphorylase                                 |
| maker-6-augustus-gene-296.33-mRNA-1 | NA | Indica   |               | Os06g0701300 | OsR498G0613255000.01.T01 | Putative aarF domain-containing protein kinase                            |
| maker-6-augustus-gene-296.41-mRNA-1 | NA | NA       |               | Os06g0701400 | OsR498G0613255600.01.T01 | 60s acidic ribosomal protein-domain-containing protein                    |
| maker-6-augustus-gene-296.43-mRNA-1 | NA | NA       |               | Os06g0701600 | OsR498G0613256400.01.T02 | Probable cation transporter HKT9                                          |
| maker-6-augustus-gene-296.46-mRNA-1 | NA | NA       |               | Os06g0701700 | OsR498G0613256600.01.T01 | HKT24 transporter                                                         |
| maker-6-augustus-gene-298.14-mRNA-1 | NA | Japonica |               | Os06g0703300 | OsR498G0613266700.01.T02 | DUF4220 domain-containing protein (Fragment)                              |
| maker-6-augustus-gene-298.18-mRNA-1 | NA | Indica   |               | Os06g0703800 | OsR498G0613267900.01.T01 | Chaperone binding,ATPase activators                                       |
| maker-6-augustus-gene-298.27-mRNA-1 | NA | NA       |               | Os09g0443400 | OsR498G1120714100.01.T02 | Glycine-rich RNA-binding protein-like                                     |
| maker-6-augustus-gene-298.32-mRNA-1 | NA | NA       |               | Os06g0703500 | OsR498G0613267000.01.T02 | Squamosa-promoter binding protein-like protein                            |
| maker-6-augustus-gene-299.38-mRNA-1 | NA | NA       |               | Os06g0704000 |                          | DUF659 domain-containing protein                                          |
| maker-6-augustus-gene-299.43-mRNA-1 | NA | NA       |               | Os06g0704300 | OsR498G0613270500.01.T03 | Zinc finger CCH domain-containing protein 46                              |
| maker-6-augustus-gene-299.48-mRNA-1 | NA | NA       |               | Os06g0704900 | OsR498G0613272300.01.T01 | Putative tRNA (cytidine(32)/guanosine(34)-2'-O)-methyltransferase         |
| maker-6-augustus-gene-299.56-mRNA-1 | NA | NA       |               | Os06g0705100 | OsR498G0613272900.01.T01 | Thylakoid luminal protein, chloroplastic                                  |
| maker-6-augustus-gene-299.60-mRNA-1 | NA | NA       |               | Os06g0704200 | OsR498G0613270400.01.T01 |                                                                           |
| maker-6-augustus-gene-299.63-mRNA-1 | NA | NA       |               | Os06g0704600 |                          | Delta-aminolevulinic acid dehydratase                                     |
| maker-6-augustus-gene-299.65-mRNA-1 | NA | NA       |               | Os06g0704700 | OsR498G0613271600.01.T06 | Hopanoid-associated sugar epimerase                                       |
| maker-6-augustus-gene-299.69-mRNA-1 | NA | NA       |               |              |                          | Histone acetyltransferase                                                 |
| maker-6-augustus-gene-299.73-mRNA-1 | NA | Japonica |               | Os06g0705300 | OsR498G0202925100.01.T04 | Plant-specific domain TIGR01589 family protein                            |
| maker-6-augustus-gene-299.75-mRNA-1 | NA | NA       |               | Os06g0705500 | OsR498G0613274600.01.T01 | CUE domain-containing protein                                             |
| maker-6-augustus-gene-30.37-mRNA-1  | NA | NA       |               | Os06g0156900 | OsR498G0611653900.01.T01 | Hexosyltransferase                                                        |
| maker-6-augustus-gene-30.41-mRNA-1  | NA | Japonica |               | Os06g0157500 | OsR498G0611656900.01.T01 |                                                                           |
| maker-6-augustus-gene-30.43-mRNA-1  | NA | NA       |               | Os06g0157700 | OsR498G0611656900.01.T01 | PEBP                                                                      |
| maker-6-augustus-gene-30.45-mRNA-1  | NA | NA       |               | 0            | OsR498G0611657900.01.T01 | Non-specific lipid-transfer protein                                       |
| maker-6-augustus-gene-30.47-mRNA-1  | NA | NA       |               | Os06g0158000 | OsR498G0611658100.01.T03 | Fatty acyl-CoA synthetase A                                               |
| maker-6-augustus-gene-30.53-mRNA-1  | NA | NA       |               | Os06g0158100 | OsR498G0611658300.01.T02 | WRKY transcription factor                                                 |
| maker-6-augustus-gene-30.55-mRNA-1  | NA | NA       |               |              |                          | Sulfotransferase                                                          |
| maker-6-augustus-gene-30.60-mRNA-1  | NA | Indica   |               | Os06g0157000 | OsR498G0611654200.01.T02 | GDSL esterase/lipase                                                      |
| maker-6-augustus-gene-30.64-mRNA-1  | NA | NA       | NBS-TM        | Os06g0158300 | OsR498G0611659000.01.T02 | Putative NB-ARC domain-containing protein (Fragment)                      |
| maker-6-augustus-gene-30.68-mRNA-1  | NA | NA       | CC-LRR-NBS-TM | Os06g0158500 | OsR498G0611659400.01.T01 | Putative NB-ARC domain-containing protein (Fragment)                      |
| maker-6-augustus-gene-30.70-mRNA-1  | NA | NA       |               | Os06g0158600 | OsR498G0611659600.01.T01 | Hevamine-a                                                                |
| maker-6-augustus-gene-300.52-mRNA-1 | NA | NA       |               | Os06g0705700 | OsR498G0613275500.01.T01 | Peptide transporter PTR2                                                  |
| maker-6-augustus-gene-300.67-mRNA-1 | NA | Indica   |               | Os06g0707000 | OsR498G0613278200.01.T01 | Glycosyltransferase family 61 protein                                     |
| maker-6-augustus-gene-300.70-mRNA-1 | NA | NA       |               | Os06g0707200 | OsR498G0613278600.01.T01 | Protein O-linked-mannose beta-1,4-N-acetylglucosaminyltransferase 2-like  |
| maker-6-augustus-gene-301.44-mRNA-1 | NA | NA       |               | 0            | OsR498G0613282100.01.T01 | Type 2 DNA topoisomerase 6 subunit B-like                                 |
| maker-6-augustus-gene-301.65-mRNA-1 | NA | NA       |               | Os06g0710800 | OsR498G0613286900.01.T05 | Pentatricopeptide repeat-containing protein, mitochondrial                |
| maker-6-augustus-gene-301.67-mRNA-1 | NA | NA       |               |              |                          | Putative isoprenylcysteine alpha-carbonyl methyltransferase ICME          |
| maker-6-augustus-gene-302.46-mRNA-1 | NA | Indica   |               | Os06g0711900 | OsR498G0613290700.01.T01 | AAI domain-containing protein                                             |
| maker-6-augustus-gene-302.48-mRNA-1 | NA | NA       |               | Os06g0712300 | OsR498G0613291900.01.T02 | Lysophospholipid acyltransferase LPEAT2                                   |
| maker-6-augustus-gene-302.52-mRNA-1 | NA | NA       |               | Os06g0712400 | OsR498G0613292600.01.T02 | NF-E2 inducible protein-like                                              |
| maker-6-augustus-gene-303.0-mRNA-1  | NA | Indica   |               | Os09g0531900 | OsR498G0613293100.01.T01 | Hexosyltransferase                                                        |
| maker-6-augustus-gene-303.11-mRNA-1 | NA | NA       |               | Os06g0712900 | OsR498G0613296000.01.T01 | FMN-linked oxidoreductases superfamily protein                            |
| maker-6-augustus-gene-303.13-mRNA-1 | NA | NA       |               | Os06g0713100 | OsR498G0613297400.01.T01 | Mitochondrion protein                                                     |
| maker-6-augustus-gene-303.27-mRNA-1 | NA | NA       |               | Os06g0714100 | OsR498G0613298800.01.T01 |                                                                           |
| maker-6-augustus-gene-303.5-mRNA-1  | NA | Indica   |               | Os11g0186300 | OsR498G0613295700.01.T02 | probable methyltransferase PMT27                                          |
| maker-6-augustus-gene-306.35-mRNA-1 | NA | NA       |               |              |                          | NF-E2 inducible protein-like                                              |
| maker-6-augustus-gene-306.42-mRNA-1 | NA | NA       |               |              |                          | Homeobox-leucine zipper protein HOX29                                     |
| maker-6-augustus-gene-306.49-mRNA-1 | NA | Indica   |               | Os06g0724000 | OsR498G0613324000.01.T01 | BZIP transcription factor                                                 |
| maker-6-augustus-gene-306.56-mRNA-1 | NA | NA       |               |              |                          | NF-E2 inducible protein-like                                              |
| maker-6-augustus-gene-306.63-mRNA-1 | NA | NA       |               | Os06g0722100 | OsR498G0613323500.01.T01 | DUF1618 domain-containing protein (Fragment)                              |
| maker-6-augustus-gene-307.32-mRNA-1 | NA | NA       |               |              |                          | Homeobox-leucine zipper protein HOX29                                     |
| maker-6-augustus-gene-307.39-mRNA-1 | NA | NA       |               |              |                          |                                                                           |
| maker-6-augustus-gene-307.40-mRNA-1 | NA | NA       |               | Os06g0722100 | OsR498G0613323500.01.T01 | DUF1618 domain-containing protein (Fragment)                              |
| maker-6-augustus-gene-307.51-mRNA-1 | NA | Indica   |               | Os06g0724600 | OsR498G0613325900.01.T01 | RRM domain-containing protein (Fragment)                                  |
| maker-6-augustus-gene-307.57-mRNA-1 | NA | Indica   |               | Os06g0724800 | OsR498G0613327500.01.T01 | Transcription factor bHLH93                                               |

|                                     |    |          |              |              |                          |                                                             |
|-------------------------------------|----|----------|--------------|--------------|--------------------------|-------------------------------------------------------------|
| maker-6-augustus-gene-307.59-mRNA-1 | NA | NA       |              | Os06g0722100 | OsR498G0613323500.01.T01 | DUF1618 domain-containing protein (Fragment)                |
| maker-6-augustus-gene-307.61-mRNA-1 | NA | NA       |              | Os06g0722100 | OsR498G0613323500.01.T01 | DUF1618 domain-containing protein (Fragment)                |
| maker-6-augustus-gene-307.63-mRNA-1 | NA | NA       |              |              |                          | Putative retroelement                                       |
| maker-6-augustus-gene-307.66-mRNA-1 | NA | Indica   |              | Os06g0724000 | OsR498G0613324000.01.T01 | BZIP transcription factor                                   |
| maker-6-augustus-gene-307.73-mRNA-1 | NA | NA       |              | Os06g0724300 | OsR498G0613325200.01.T02 | DUF616 domain-containing protein                            |
| maker-6-augustus-gene-307.77-mRNA-1 | NA | NA       |              | Os06g0724400 | OsR498G0613325600.01.T01 | DNL-type domain-containing protein                          |
| maker-6-augustus-gene-307.80-mRNA-1 | NA | NA       |              | Os06g0724500 | OsR498G0613325800.01.T01 | DDB1-and CUL4-associated factor like                        |
| maker-6-augustus-gene-308.0-mRNA-1  | NA | NA       | Kinase-TM    | Os06g0724900 | OsR498G0613327700.01.T03 | Serine/threonine-protein kinase sty46                       |
| maker-6-augustus-gene-308.11-mRNA-1 | NA | NA       |              | 0            | OsR498G0613328000.01.T02 | Rhodanese domain-containing protein (Fragment)              |
| maker-6-augustus-gene-308.16-mRNA-1 | NA | NA       |              | Os06g0725100 | OsR498G0613328200.01.T01 | GDSL esterase/lipase                                        |
| maker-6-augustus-gene-308.18-mRNA-1 | NA | Indica   |              | Os06g0725200 | OsR498G0613328600.01.T01 | GDSL esterase/lipase                                        |
| maker-6-augustus-gene-308.5-mRNA-1  | NA | Japonica |              | Os06g0725400 | OsR498G0613329300.01.T02 | NADH dehydrogenase 1 beta subcomplex subunit 2              |
| maker-6-augustus-gene-31.0-mRNA-1   | NA | NA       |              | Os06g0158700 | OsR498G0611659700.01.T01 | Lactoylglutathione lyase / glyoxalase I family protein      |
| maker-6-augustus-gene-31.14-mRNA-1  | NA | Indica   |              | Os12g0562700 | OsR498G0611660200.01.T02 | ABC transporter C family member 10                          |
| maker-6-augustus-gene-31.2-mRNA-1   | NA | NA       |              | Os06g0159400 | OsR498G0611660500.01.T02 | Putative Heat shock protein STI                             |
| maker-6-augustus-gene-31.22-mRNA-1  | NA | Japonica |              | Os06g0159750 | OsR498G0611661000.01.T01 | histone H3-like centromeric protein CSE4                    |
| maker-6-augustus-gene-31.24-mRNA-1  | NA | NA       |              | Os06g0160200 | OsR498G0611662600.01.T01 | Lanatoside 15'-O-acetylesterase                             |
| maker-6-augustus-gene-31.26-mRNA-1  | NA | Indica   |              | Os06g0160400 | OsR498G0611662800.01.T01 | Proline-rich cell wall protein-like                         |
| maker-6-augustus-gene-31.28-mRNA-1  | NA | NA       |              | Os06g0160600 | OsR498G0611664800.01.T02 |                                                             |
| maker-6-augustus-gene-31.30-mRNA-1  | NA | NA       |              | 0            | OsR498G0611665000.01.T01 | Starch synthase, chloroplastic/amyloplastic                 |
| maker-6-augustus-gene-31.5-mRNA-1   | NA | NA       |              | Os06g0159600 | OsR498G0611661100.01.T02 | Putative Heat shock protein STI                             |
| maker-6-augustus-gene-31.8-mRNA-1   | NA | NA       |              | Os06g0159900 | OsR498G0611662100.01.T05 | E3 ubiquitin ligase                                         |
| maker-6-augustus-gene-312.86-mRNA-1 | NA | Indica   |              | Os06g0703800 | OsR498G0613267900.01.T02 | Activator of 90 kDa heat shock protein ATPase               |
| maker-6-augustus-gene-312.90-mRNA-1 | NA | Indica   |              | Os06g0707000 | OsR498G0613278200.01.T01 | Glycosyltransferase family 61 protein                       |
| maker-6-augustus-gene-32.0-mRNA-1   | NA | NA       |              | 0            | OsR498G0611667500.01.T02 | FBD domain-containing protein                               |
| maker-6-augustus-gene-32.10-mRNA-1  | NA | Indica   |              | Os06g0161900 | OsR498G0611670100.01.T01 | DUF569 domain-containing protein                            |
| maker-6-augustus-gene-32.19-mRNA-1  | NA | NA       |              | Os06g0162500 | OsR498G0611670900.01.T01 | probable 2-oxoglutarate-dependent dioxygenase ANS           |
| maker-6-augustus-gene-32.21-mRNA-1  | NA | NA       |              | 0            | OsR498G0611671900.01.T01 | MYB transcription factor-like                               |
| maker-6-augustus-gene-32.23-mRNA-1  | NA | NA       |              | Os06g0163200 | OsR498G0611673700.01.T01 | Putative esterase YitV                                      |
| maker-6-augustus-gene-32.27-mRNA-1  | NA | NA       |              | 0            | OsR498G0611671400.01.T01 | Carotenoid cleavage dioxygenase                             |
| maker-6-augustus-gene-32.30-mRNA-1  | NA | NA       |              | Os06g0162600 | OsR498G0611671800.01.T02 | MTS domain-containing protein                               |
| maker-6-augustus-gene-32.36-mRNA-1  | NA | NA       |              | Os06g0162800 | OsR498G0611672200.01.T01 | Leafy hull sterile 1-like protein (Fragment)                |
| maker-6-augustus-gene-32.42-mRNA-1  | NA | NA       | CC-Kinase-TM | Os06g0163000 | OsR498G0611673200.01.T03 | E3 ubiquitin ligase                                         |
| maker-6-augustus-gene-32.5-mRNA-1   | NA | NA       |              | Os06g0161400 | OsR498G0611668700.01.T01 |                                                             |
| maker-6-augustus-gene-32.9-mRNA-1   | NA | NA       |              | Os06g0161900 | OsR498G0611669700.01.T01 | DUF569 domain-containing protein                            |
| maker-6-augustus-gene-33.0-mRNA-1   | NA | NA       |              | Os06g0163300 | OsR498G0611674100.01.T02 | Harpin-induced protein                                      |
| maker-6-augustus-gene-33.14-mRNA-1  | NA | NA       |              | 0            | OsR498G0611677500.01.T01 | Transcription factor SPATULA                                |
| maker-6-augustus-gene-33.2-mRNA-1   | NA | NA       |              | Os06g0163400 | OsR498G0611674700.01.T01 | Protein disulfide-isomerase A1                              |
| maker-6-augustus-gene-33.21-mRNA-1  | NA | NA       |              | 0            | OsR498G0611678100.01.T04 |                                                             |
| maker-6-augustus-gene-33.23-mRNA-1  | NA | NA       |              | 0            | OsR498G0611675200.01.T01 | Alpha/beta hydrolase-1                                      |
| maker-6-augustus-gene-33.29-mRNA-1  | NA | NA       | LRR-NBS-TM   | Os06g0163800 | OsR498G0611676000.01.T01 | Disease resistance protein RPP13                            |
| maker-6-augustus-gene-33.31-mRNA-1  | NA | NA       |              | Os06g0164000 | OsR498G0611676600.01.T02 | SP-RING-type domain-containing protein                      |
| maker-6-augustus-gene-33.41-mRNA-1  | NA | NA       |              | Os06g0164100 | OsR498G0611677000.01.T01 | Serine/threonine-protein phosphatase                        |
| maker-6-augustus-gene-33.8-mRNA-1   | NA | Indica   |              | Os06g0163500 | OsR498G0611674900.01.T01 | Membrane-bound transcription factor site-1 protease         |
| maker-6-augustus-gene-34.0-mRNA-1   | NA | NA       |              | 0            | OsR498G0611679700.01.T02 |                                                             |
| maker-6-augustus-gene-34.11-mRNA-1  | NA | NA       |              | Os06g0167100 | OsR498G0611684900.01.T05 | AP-1 complex subunit gamma                                  |
| maker-6-augustus-gene-34.19-mRNA-1  | NA | NA       |              | Os06g0166000 | OsR498G0611681600.01.T02 | F-box domain and LRR containing protein                     |
| maker-6-augustus-gene-34.2-mRNA-1   | NA | Indica   |              | Os06g0165800 | OsR498G0611680700.01.T03 | Caffeoyl CoA O-methyltransferase                            |
| maker-6-augustus-gene-34.23-mRNA-1  | NA | NA       |              | Os06g0166500 | OsR498G0611683600.01.T02 | Auxin-responsive protein IAA20                              |
| maker-6-augustus-gene-34.26-mRNA-1  | NA | NA       |              | 0            | OsR498G0611684400.01.T01 | Pre-mRNA-processing-splicing factor 8A                      |
| maker-6-augustus-gene-34.5-mRNA-1   | NA | NA       |              |              |                          | SWIM-type domain-containing protein                         |
| maker-6-augustus-gene-34.7-mRNA-1   | NA | NA       | Kinase-TM    | Os06g0166900 | OsR498G0611684100.01.T01 | Mitogen-activated protein kinase kinase kinase              |
| maker-6-augustus-gene-35.35-mRNA-1  | NA | NA       |              | Os06g0167400 | OsR498G0714733700.01.T03 | Alkyl transferase                                           |
| maker-6-augustus-gene-35.37-mRNA-1  | NA | NA       | LRR-TM       | Os06g0167500 | OsR498G0611685900.01.T01 | Malectin domain-containing protein (Fragment)               |
| maker-6-augustus-gene-35.46-mRNA-1  | NA | NA       |              | Os06g0168000 | OsR498G0611686700.01.T01 | Mitochondrial outer membrane import complex protein METAXIN |
| maker-6-augustus-gene-35.49-mRNA-1  | NA | NA       |              | 0            | OsR498G0611688900.01.T01 | X8 domain-containing protein                                |
| maker-6-augustus-gene-35.53-mRNA-1  | NA | NA       |              |              |                          |                                                             |
| maker-6-augustus-gene-35.54-mRNA-1  | NA | NA       |              | 0            | OsR498G0611687000.01.T04 |                                                             |
| maker-6-augustus-gene-35.57-mRNA-1  | NA | NA       |              | Os06g0168500 | OsR498G0611687600.01.T01 | t-SNARE coiled-coil homology domain-containing protein      |
| maker-6-augustus-gene-35.67-mRNA-1  | NA | NA       | Kinase-TM    | Os06g0168800 | OsR498G0611688600.01.T01 | Mitogen-activated protein kinase kinase kinase              |
| maker-6-augustus-gene-36.0-mRNA-1   | NA | NA       |              | Os06g0170200 | OsR498G0611689300.01.T01 | Mannose/glucose-specific lectin                             |

|                                    |    |          |           |              |                          |                                                                  |
|------------------------------------|----|----------|-----------|--------------|--------------------------|------------------------------------------------------------------|
| maker-6-augustus-gene-36.10-mRNA-1 | NA | NA       |           | 0            | OsR498G0714849700.01.T01 | L10-interacting MYB domain-containing protein                    |
| maker-6-augustus-gene-36.12-mRNA-1 | NA | NA       | Kinase-TM | Os06g0170250 |                          | Putative WAK family receptor-like protein kinase                 |
| maker-6-augustus-gene-36.15-mRNA-1 | NA | NA       |           | Os06g0170500 | OsR498G0611692400.01.T01 | Zinc finger CCCH domain-containing protein 4                     |
| maker-6-augustus-gene-36.5-mRNA-1  | NA | NA       |           | Os06g0161900 | OsR498G0611693600.01.T02 | DUF569 domain-containing protein                                 |
| maker-6-augustus-gene-37.0-mRNA-1  | NA | NA       |           | Os06g0170500 | OsR498G0611692400.01.T01 | Zinc finger CCCH domain-containing protein 4                     |
| maker-6-augustus-gene-37.1-mRNA-1  | NA | NA       | Kinase-TM | Os06g0170250 |                          | Putative WAK family receptor-like protein kinase                 |
| maker-6-augustus-gene-37.14-mRNA-1 | NA | Indica   |           | Os06g0161900 | OsR498G0204888100.01.T01 | DUF569 domain-containing protein                                 |
| maker-6-augustus-gene-37.16-mRNA-1 | NA | NA       |           | Os06g0171700 | OsR498G0611697700.01.T01 | CDK-activating kinase assembly factor MAT1                       |
| maker-6-augustus-gene-37.28-mRNA-1 | NA | Indica   |           | Os06g0171600 | OsR498G0611697600.01.T01 | ALBINO3-like protein 2 chloroplastic                             |
| maker-6-augustus-gene-37.38-mRNA-1 | NA | Indica   |           | Os06g0172800 | OsR498G0611702200.01.T01 | Galactinol--sucrose galactosyltransferase                        |
| maker-6-augustus-gene-38.32-mRNA-1 | NA | NA       |           | 0            | OsR498G0611702700.01.T01 | Telomere-associated protein RIF1                                 |
| maker-6-augustus-gene-38.36-mRNA-1 | NA | NA       |           | Os06g0173100 | OsR498G0611703100.01.T02 | 26S proteasome regulatory particle triple-A ATPase protein       |
| maker-6-augustus-gene-38.41-mRNA-1 | NA | Indica   |           | Os06g0174325 | OsR498G0611707300.01.T02 | Sulfiredoxin                                                     |
| maker-6-augustus-gene-38.45-mRNA-1 | NA | Indica   |           | Os06g0174350 | OsR498G0611707500.01.T02 | DCD domain-containing protein (Fragment)                         |
| maker-6-augustus-gene-38.50-mRNA-1 | NA | NA       |           | 0            | OsR498G0611707700.01.T01 | DCD domain-containing protein                                    |
| maker-6-augustus-gene-38.52-mRNA-1 | NA | NA       |           | 0            | OsR498G0611707200.01.T01 | SANT domain-containing protein                                   |
| maker-6-augustus-gene-38.54-mRNA-1 | NA | NA       |           | Os06g0174400 | OsR498G0611708000.01.T03 | Vesicle-associated membrane protein 713                          |
| maker-6-augustus-gene-39.46-mRNA-1 | NA | NA       |           | Os06g0175800 | OsR498G0611712100.01.T02 | Cys/Met metabolism                                               |
| maker-6-augustus-gene-39.53-mRNA-1 | NA | NA       |           | Os06g0176200 | OsR498G0611713100.01.T04 | Hexosyltransferase                                               |
| maker-6-augustus-gene-39.56-mRNA-1 | NA | Japonica |           | Os06g0177600 | OsR498G0611713300.01.T02 | Fe2OG dioxygenase domain-containing protein (Fragment)           |
| maker-6-augustus-gene-39.58-mRNA-1 | NA | NA       |           | Os06g0177700 | OsR498G0611713700.01.T02 | Fe2OG dioxygenase domain-containing protein (Fragment)           |
| maker-6-augustus-gene-39.59-mRNA-1 | NA | NA       |           | Os06g0178100 | OsR498G0611713700.01.T03 | Fe2OG dioxygenase domain-containing protein (Fragment)           |
| maker-6-augustus-gene-39.72-mRNA-1 | NA | Indica   |           | Os06g0178300 | OsR498G0611714100.01.T03 | Oxoglutarate/iron-dependent dioxygenase                          |
| maker-6-augustus-gene-39.73-mRNA-1 | NA | NA       |           | Os06g0178700 | OsR498G0611714100.01.T04 | Fe2OG dioxygenase domain-containing protein (Fragment)           |
| maker-6-augustus-gene-39.82-mRNA-1 | NA | NA       |           | Os06g0175400 | OsR498G0611710800.01.T01 | BSD domain-containing protein (Fragment)                         |
| maker-6-augustus-gene-39.84-mRNA-1 | NA | NA       |           | Os06g0175500 | OsR498G0611711000.01.T01 | ENTH domain-containing protein (Fragment)                        |
| maker-6-augustus-gene-39.89-mRNA-1 | NA | NA       |           |              |                          | 30S ribosomal protein S15, chloroplastic                         |
| maker-6-augustus-gene-40.38-mRNA-1 | NA | Indica   |           | Os06g0178900 | OsR498G0611716100.01.T01 | H(+)-exporting diphosphatase                                     |
| maker-6-augustus-gene-40.43-mRNA-1 | NA | NA       | Kinase-TM | 0            | OsR498G0611724300.01.T05 | Serine/threonine-protein kinase                                  |
| maker-6-augustus-gene-40.49-mRNA-1 | NA | NA       |           | Os06g0181300 | OsR498G0611724500.01.T01 | Terminal acidic SANT 1                                           |
| maker-6-augustus-gene-40.52-mRNA-1 | NA | NA       |           | Os06g0179000 | OsR498G0611716600.01.T01 | Heparanase-like protein 3                                        |
| maker-6-augustus-gene-40.53-mRNA-1 | NA | NA       |           | Os06g0179200 | OsR498G0611717600.01.T01 | Nodulin-like domain-containing protein                           |
| maker-6-augustus-gene-40.68-mRNA-1 | NA | NA       |           | Os06g0179700 | OsR498G0611718800.01.T01 | Protein-serine/threonine phosphatase                             |
| maker-6-augustus-gene-40.71-mRNA-1 | NA | NA       | LRR-TM    | Os06g0179800 | OsR498G0611719000.01.T04 | Putative leucine-rich repeat domain, L domain-containing protein |
| maker-6-augustus-gene-40.76-mRNA-1 | NA | Indica   |           | Os06g0180000 | OsR498G0611719400.01.T02 | Hydroxyproline O-arabinosyltransferase                           |
| maker-6-augustus-gene-40.80-mRNA-1 | NA | NA       |           | 0            | OsR498G0611719800.01.T01 |                                                                  |
| maker-6-augustus-gene-40.82-mRNA-1 | NA | NA       |           | 0            | OsR498G0611721200.01.T01 |                                                                  |
| maker-6-augustus-gene-40.84-mRNA-1 | NA | NA       |           |              |                          |                                                                  |
| maker-6-augustus-gene-40.86-mRNA-1 | NA | NA       |           | 0            | OsR498G0611722000.01.T03 | RING-H2 zinc finger protein-like                                 |
| maker-6-augustus-gene-41.25-mRNA-1 | NA | Indica   |           | Os06g0181400 | OsR498G0611724700.01.T05 | DAO domain-containing protein (Fragment)                         |
| maker-6-augustus-gene-41.31-mRNA-1 | NA | Indica   |           | Os06g0181700 | OsR498G0611726300.01.T01 | Ethylene-responsive transcription factor                         |
| maker-6-augustus-gene-42.0-mRNA-1  | NA | NA       |           | Os06g0183100 | OsR498G0611732100.01.T01 | Two-component response regulator                                 |
| maker-6-augustus-gene-42.10-mRNA-1 | NA | NA       |           | 0            | OsR498G0611733400.01.T04 | CHD3-type chromatin-remodeling factor PICKLE                     |
| maker-6-augustus-gene-42.22-mRNA-1 | NA | NA       |           | Os06g0184300 | OsR498G0611735600.01.T01 | Ubiquitin carboxyl-terminal hydrolase                            |
| maker-6-augustus-gene-42.3-mRNA-1  | NA | NA       |           | 0            | OsR498G0611732400.01.T01 | Sensor protein gacS                                              |
| maker-6-augustus-gene-43.44-mRNA-1 | NA | NA       |           | Os06g0184500 | OsR498G0611736400.01.T01 | BTB/POZ domain-containing protein NPY1                           |
| maker-6-augustus-gene-44.40-mRNA-1 | NA | Indica   |           | Os06g0187200 | OsR498G0611744800.01.T01 | UDP-glucuronate 4-epimerase 1                                    |
| maker-6-augustus-gene-45.0-mRNA-1  | NA | NA       |           | Os06g0187900 | OsR498G0611747100.01.T08 | Serine/arginine-rich splicing factor 7                           |
| maker-6-augustus-gene-45.16-mRNA-1 | NA | NA       |           | 0            | OsR498G0611748000.01.T01 | Glutamate receptor                                               |
| maker-6-augustus-gene-45.4-mRNA-1  | NA | Indica   |           | Os06g0188000 | OsR498G0611747500.01.T01 | Cyclic nucleotide-gated ion channel 17                           |
| maker-6-augustus-gene-46.0-mRNA-1  | NA | NA       |           | 0            | OsR498G0100693500.01.T01 | Transposable element protein, putative, MuDR                     |
| maker-6-augustus-gene-46.19-mRNA-1 | NA | Indica   |           | Os06g0188800 | OsR498G0611751000.01.T01 | PBPc domain-containing protein                                   |
| maker-6-augustus-gene-46.2-mRNA-1  | NA | NA       |           |              |                          | Retrotransposon protein, putative, Ty3-gypsy sub-class           |
| maker-6-augustus-gene-46.21-mRNA-1 | NA | NA       |           |              |                          | PBPc domain-containing protein                                   |
| maker-6-augustus-gene-46.6-mRNA-1  | NA | Indica   |           | Os06g0190700 | OsR498G0611748600.01.T01 | PBPc domain-containing protein (Fragment)                        |
| maker-6-augustus-gene-48.49-mRNA-1 | NA | NA       |           | Os06g0193400 | OsR498G0611763200.01.T03 | Transcription factor bHLH82                                      |
| maker-6-augustus-gene-49.7-mRNA-1  | NA | NA       |           | Os06g0195600 | OsR498G0611776200.01.T02 | Phosphoinositide phosphatase SAC2                                |
| maker-6-augustus-gene-50.45-mRNA-1 | NA | NA       |           | 0            | OsR498G0611782500.01.T05 | Auxin response factor                                            |
| maker-6-augustus-gene-50.58-mRNA-1 | NA | NA       |           | Os06g0196900 | OsR498G0611782900.01.T05 | 20 kDa chaperonin chloroplastic                                  |
| maker-6-augustus-gene-50.75-mRNA-1 | NA | NA       |           | Os06g0196600 | OsR498G0611780800.01.T03 | Beta-ketoacyl-[acyl-carrier-protein] synthase I                  |
| maker-6-augustus-gene-51.40-mRNA-1 | NA | NA       |           | 0            | OsR498G0611788500.01.T01 |                                                                  |

|                                    |    |          |               |              |                          |                                                          |
|------------------------------------|----|----------|---------------|--------------|--------------------------|----------------------------------------------------------|
| maker-6-augustus-gene-51.44-mRNA-1 | NA | NA       |               |              |                          | G protein-coupled receptor                               |
| maker-6-augustus-gene-51.49-mRNA-1 | NA | NA       |               | Os06g0198500 | OsR498G0611788200.01.T01 | Liver carboxylesterase (Fragment)                        |
| maker-6-augustus-gene-51.51-mRNA-1 | NA | Indica   |               | Os06g0198500 | OsR498G0611788400.01.T01 | RmlC-like jelly roll fold                                |
| maker-6-augustus-gene-51.53-mRNA-1 | NA | NA       |               | 0            | OsR498G0611789000.01.T01 | 25.3 kDa vesicle transport protein, putative, expressed  |
| maker-6-augustus-gene-51.59-mRNA-1 | NA | Indica   |               | Os06g0199100 | OsR498G0611789800.01.T07 | Chloroplast RNA splicing4                                |
| maker-6-augustus-gene-51.62-mRNA-1 | NA | NA       |               | Os06g0199200 | OsR498G0611790200.01.T06 | Smr domain-containing protein (Fragment)                 |
| maker-6-augustus-gene-51.66-mRNA-1 | NA | NA       |               | Os06g0199500 | OsR498G0611791800.01.T04 | Flavoprotein domain-containing protein (Fragment)        |
| maker-6-augustus-gene-52.42-mRNA-1 | NA | Indica   |               | Os06g0202700 | OsR498G0611802900.01.T01 |                                                          |
| maker-6-augustus-gene-52.44-mRNA-1 | NA | NA       |               | Os09g0545320 |                          | Iron/ascorbate-dependent oxidoreductase-like             |
| maker-6-augustus-gene-52.47-mRNA-1 | NA | Indica   |               | Os06g0202800 | OsR498G0611803600.01.T01 | FBD domain-containing protein (Fragment)                 |
| maker-6-augustus-gene-53.0-mRNA-1  | NA | Indica   |               | Os02g0778400 | OsR498G0611807100.01.T03 | Adenylate kinase                                         |
| maker-6-augustus-gene-53.10-mRNA-1 | NA | NA       |               | 0            | OsR498G0611807500.01.T01 |                                                          |
| maker-6-augustus-gene-53.12-mRNA-1 | NA | NA       |               |              |                          | FBD domain-containing protein                            |
| maker-6-augustus-gene-53.13-mRNA-1 | NA | NA       |               | 0            | OsR498G0611811300.01.T01 | FBD domain-containing protein (Fragment)                 |
| maker-6-augustus-gene-53.21-mRNA-1 | NA | NA       |               | Os06g0203200 | OsR498G0611805800.01.T02 | Flavin-containing monooxygenase                          |
| maker-6-augustus-gene-53.26-mRNA-1 | NA | NA       | Kinase-LRR-TM | Os06g0203800 | OsR498G0611808400.01.T02 | LRR receptor-like serine/threonine-protein kinase ERECTA |
| maker-6-augustus-gene-53.31-mRNA-1 | NA | Indica   |               | Os06g0204400 | OsR498G0611811000.01.T04 | ECPT-type aminoalcoholphosphotransferase                 |
| maker-6-augustus-gene-53.5-mRNA-1  | NA | NA       |               | Os06g0203600 | OsR498G0611807100.01.T15 | Chalcone--flavonone isomerase                            |
| maker-6-augustus-gene-54.39-mRNA-1 | NA | NA       |               | 0            | OsR498G0611811700.01.T01 | FBD domain-containing protein (Fragment)                 |
| maker-6-augustus-gene-54.41-mRNA-1 | NA | NA       |               | 0            | OsR498G0611811900.01.T01 | Growth regulating factor 6                               |
| maker-6-augustus-gene-54.43-mRNA-1 | NA | NA       |               | 0            | OsR498G0409243500.01.T01 | HTH myb-type domain-containing protein                   |
| maker-6-augustus-gene-54.46-mRNA-1 | NA | NA       |               | 0            | OsR498G0611812900.01.T02 | Ubiquitin-like protein ATG12                             |
| maker-6-augustus-gene-54.47-mRNA-1 | NA | Japonica |               | Os06g0205100 | OsR498G0611814100.01.T02 | CI protein (Fragment)                                    |
| maker-6-augustus-gene-54.49-mRNA-1 | NA | Indica   |               | Os06g0206000 | OsR498G0611817500.01.T02 | Omega-amidase chloroplastic isoform X1                   |
| maker-6-augustus-gene-54.55-mRNA-1 | NA | NA       |               | Os06g0206100 | OsR498G0611817700.01.T04 | ATP-dependent DNA helicase                               |
| maker-6-augustus-gene-54.59-mRNA-1 | NA | NA       |               | Os06g0206200 | OsR498G0611818100.01.T01 | GTP-binding protein like                                 |
| maker-6-augustus-gene-54.63-mRNA-1 | NA | NA       |               | 0            | OsR498G0611818300.01.T01 | PLAT domain-containing protein                           |
| maker-6-augustus-gene-54.66-mRNA-1 | NA | Japonica |               | Os06g0205600 | OsR498G0611816600.01.T04 | Mechanosensitive ion channel protein 10                  |
| maker-6-augustus-gene-55.26-mRNA-1 | NA | NA       |               |              |                          | Centromeric protein E                                    |
| maker-6-augustus-gene-55.29-mRNA-1 | NA | NA       |               | Os06g0206700 | OsR498G0611820300.01.T05 | Kinesin-like protein kin-7k, chloroplastic               |
| maker-6-augustus-gene-55.36-mRNA-1 | NA | NA       |               | 0            | OsR498G0611820300.01.T01 | Kinesin-like protein KIN-7K chloroplastic                |
| maker-6-augustus-gene-55.38-mRNA-1 | NA | NA       |               | Os06g0207000 | OsR498G0611822700.01.T01 | Pantothenate kinase 1                                    |
| maker-6-augustus-gene-55.48-mRNA-1 | NA | NA       |               | 0            | OsR498G0611824900.01.T01 | WRC domain-containing protein                            |
| maker-6-augustus-gene-55.50-mRNA-1 | NA | Indica   |               | Os02g0773400 | OsR498G0611825200.01.T02 | Cyclic nucleotide-binding transporter 1 isoform 2        |
| maker-6-augustus-gene-56.0-mRNA-1  | NA | NA       |               | Os06g0208200 | OsR498G0611830100.01.T01 | Protein phosphatase 1 regulatory subunit 3F-like         |
| maker-6-augustus-gene-56.11-mRNA-1 | NA | NA       |               | 0            | OsR498G0611828000.01.T01 | Homeobox-leucine zipper protein MERISTEM L1              |
| maker-6-augustus-gene-56.15-mRNA-1 | NA | Indica   |               | Os02g0772000 | OsR498G0611830400.01.T05 | Transcription elongation factor SPT5                     |
| maker-6-augustus-gene-56.22-mRNA-1 | NA | NA       |               |              |                          | Putative PHD-finger domain containing protein family     |
| maker-6-augustus-gene-56.3-mRNA-1  | NA | NA       |               | Os06g0208700 | OsR498G0611833100.01.T03 | probable tyrosine-protein phosphatase DSP4               |
| maker-6-augustus-gene-56.7-mRNA-1  | NA | Indica   |               | Os02g0769200 | OsR498G0611833300.01.T02 | LysM domain-containing GPI-anchored protein 1            |
| maker-6-augustus-gene-58.40-mRNA-1 | NA | NA       |               | Os06g0211200 | OsR498G0611841300.01.T05 | ABA responsive element binding factor 1                  |
| maker-6-augustus-gene-58.43-mRNA-1 | NA | NA       |               | Os06g0211300 | OsR498G0611841700.01.T05 | non-specific lipid-transfer protein-like 1               |
| maker-6-augustus-gene-58.47-mRNA-1 | NA | NA       |               | Os06g0212500 | OsR498G0611844900.01.T01 | Fucosyltransferase                                       |
| maker-6-augustus-gene-58.49-mRNA-1 | NA | NA       |               | Os06g0211700 | OsR498G0611843200.01.T01 | Fucosyltransferase                                       |
| maker-6-augustus-gene-58.51-mRNA-1 | NA | NA       |               | Os06g0212100 | OsR498G0611844000.01.T02 | Fucosyltransferase                                       |
| maker-6-augustus-gene-58.53-mRNA-1 | NA | Japonica |               | Os06g0212300 | OsR498G0611844600.01.T01 | Fucosyltransferase                                       |
| maker-6-augustus-gene-59.12-mRNA-1 | NA | NA       |               | Os06g0213400 | OsR498G0611849000.01.T03 | Transmembrane protein 53 (Fragment)                      |
| maker-6-augustus-gene-59.16-mRNA-1 | NA | NA       |               | 0            | OsR498G0611849600.01.T01 | Cyclin-dependent kinase inhibitor                        |
| maker-6-augustus-gene-60.21-mRNA-1 | NA | NA       |               | Os06g0215500 | OsR498G0611854600.01.T01 | 12-oxo-phytyldienoic acid reductase                      |
| maker-6-augustus-gene-60.23-mRNA-1 | NA | NA       |               | Os06g0215600 | OsR498G0611854800.01.T01 | 12-oxo-phytyldienoic acid reductase                      |
| maker-6-augustus-gene-63.0-mRNA-1  | NA | NA       |               | Os06g0219400 | OsR498G0611869700.01.T02 | O-fucosyltransferase family protein                      |
| maker-6-augustus-gene-63.11-mRNA-1 | NA | NA       |               | Os06g0220500 | OsR498G0611873300.01.T01 | Glycosyltransferase                                      |
| maker-6-augustus-gene-63.13-mRNA-1 | NA | NA       |               | Os06g0220800 | OsR498G0611874100.01.T02 | 5'-adenylylsulfate reductase-like 3                      |
| maker-6-augustus-gene-63.18-mRNA-1 | NA | NA       |               | Os06g0219700 | OsR498G0611870400.01.T01 | F-box protein FBW2                                       |
| maker-6-augustus-gene-63.7-mRNA-1  | NA | NA       |               | Os06g0219600 | OsR498G0611870100.01.T02 | Polyadenylate-binding protein 3                          |
| maker-6-augustus-gene-65.3-mRNA-1  | NA | NA       |               | Os06g0222800 | OsR498G0611882600.01.T01 | Metallophosphoesterase 1                                 |
| maker-6-augustus-gene-65.5-mRNA-1  | NA | NA       |               | Os06g0222900 | OsR498G0611882800.01.T02 | IIPc domain-containing protein (Fragment)                |
| maker-6-augustus-gene-66.15-mRNA-1 | NA | NA       |               | Os06g0224200 | OsR498G0611908000.01.T03 | Dishevelled                                              |
| maker-6-augustus-gene-66.18-mRNA-1 | NA | NA       |               | Os06g0224500 | OsR498G0611909200.01.T01 | Mitochondrial transcription termination factor-like      |
| maker-6-augustus-gene-66.20-mRNA-1 | NA | NA       | Kinase-LRR-TM |              |                          | Non-specific serine/threonine protein kinase             |
| maker-6-augustus-gene-66.25-mRNA-1 | NA | Indica   |               | Os06g0225400 | OsR498G0611911800.01.T06 | Shikimate kinase                                         |



|                                    |    |        |              |              |                          |                                                                       |
|------------------------------------|----|--------|--------------|--------------|--------------------------|-----------------------------------------------------------------------|
| maker-6-augustus-gene-66.8-mRNA-1  | NA | NA     |              | 0            | OsR498G0611885800.01.T03 | Putative ARM repeat-containing protein containing family protein      |
| maker-6-augustus-gene-67.0-mRNA-1  | NA | NA     |              | Os06g0226050 | OsR498G0611913300.01.T01 | Jacalin-type lectin domain-containing protein                         |
| maker-6-augustus-gene-67.10-mRNA-1 | NA | NA     |              | 0            | OsR498G0611912800.01.T04 | ATPase family AAA domain-containing protein 1                         |
| maker-6-augustus-gene-67.17-mRNA-1 | NA | NA     |              | Os06g0226600 | OsR498G0611916800.01.T02 |                                                                       |
| maker-6-augustus-gene-67.2-mRNA-1  | NA | NA     |              | Os06g0226500 | OsR498G0611916500.01.T01 | Transcription factor ILI5                                             |
| maker-6-augustus-gene-67.20-mRNA-1 | NA | NA     |              | Os06g0226950 | OsR498G0611920000.01.T01 | Aldehyde oxygenase (deformylating)                                    |
| maker-6-augustus-gene-67.4-mRNA-1  | NA | NA     |              | Os06g0225800 | OsR498G0611912000.01.T04 | Shikimate kinase 1 chloroplastic                                      |
| maker-6-augustus-gene-68.0-mRNA-1  | NA | NA     |              | Os06g0228500 | OsR498G0611930900.01.T01 | Vacuolar amino acid transporter like                                  |
| maker-6-augustus-gene-68.2-mRNA-1  | NA | NA     |              | Os06g0227200 | OsR498G0611920800.01.T01 | DCD domain-containing protein (Fragment)                              |
| maker-6-augustus-gene-68.4-mRNA-1  | NA | Indica |              | Os02g0745400 | OsR498G0611921600.01.T01 | Hexosyltransferase                                                    |
| maker-6-augustus-gene-68.6-mRNA-1  | NA | NA     |              | Os06g0228200 | OsR498G0611927800.01.T02 | Aquaporin NIP2-2                                                      |
| maker-6-augustus-gene-68.9-mRNA-1  | NA | NA     |              | Os06g0228600 | OsR498G0611931400.01.T01 | Amino acid permease 6                                                 |
| maker-6-augustus-gene-69.0-mRNA-1  | NA | NA     |              | Os06g0228900 | OsR498G0611931900.01.T02 | RWP-RK domain-containing protein (Fragment)                           |
| maker-6-augustus-gene-69.16-mRNA-1 | NA | NA     |              | Os06g0229400 | OsR498G0611934500.01.T01 | Gdsl esteraselipase                                                   |
| maker-6-augustus-gene-69.18-mRNA-1 | NA | NA     |              | Os06g0229800 | OsR498G0611935700.01.T01 | Starch synthase, chloroplastic/amyloplastic                           |
| maker-6-augustus-gene-69.2-mRNA-1  | NA | NA     |              | Os06g0229200 | OsR498G0611933700.01.T04 | Galectin domain-containing protein                                    |
| maker-6-augustus-gene-69.21-mRNA-1 | NA | NA     |              | 0            | OsR498G0611936300.01.T01 | Glucomannan 4-beta-mannosyltransferase                                |
| maker-6-augustus-gene-69.26-mRNA-1 | NA | NA     |              | Os06g0231050 | OsR498G0611937500.01.T03 | Casparian strip membrane protein 3                                    |
| maker-6-augustus-gene-69.28-mRNA-1 | NA | NA     |              | Os06g0228800 | OsR498G0611931600.01.T01 | Solute carrier family 32                                              |
| maker-6-augustus-gene-69.30-mRNA-1 | NA | Indica |              | Os06g0229066 | OsR498G0611932200.01.T01 | ATP-dependent zinc metalloprotease FTSH 6 chloroplastic               |
| maker-6-augustus-gene-69.32-mRNA-1 | NA | NA     |              | 0            | OsR498G0611936600.01.T05 | Signal peptide peptidase                                              |
| maker-6-augustus-gene-69.8-mRNA-1  | NA | NA     |              | Os06g0229300 | OsR498G0611934300.01.T01 | Homeobox protein HAZ1                                                 |
| maker-6-augustus-gene-69.9-mRNA-1  | NA | NA     |              | Os06g0229300 | OsR498G0611934300.01.T02 | Putative homeodomain-like transcription factor superfamily protein    |
| maker-6-augustus-gene-70.23-mRNA-1 | NA | NA     |              | Os06g0231300 | OsR498G0611937900.01.T02 | CS domain-containing protein                                          |
| maker-6-augustus-gene-70.26-mRNA-1 | NA | NA     |              | Os06g0232200 | OsR498G0611941700.01.T01 | probable fructokinase-6, chloroplastic                                |
| maker-6-augustus-gene-70.28-mRNA-1 | NA | NA     |              | Os06g0232300 | OsR498G0611943700.01.T01 | Auxin efflux carrier component                                        |
| maker-6-augustus-gene-70.30-mRNA-1 | NA | NA     |              | Os06g0231600 | OsR498G0611939200.01.T01 | NEP1-interacting protein-like 2                                       |
| maker-6-augustus-gene-70.33-mRNA-1 | NA | NA     |              | Os06g0232000 | OsR498G0611939800.01.T01 | Pro-resilin                                                           |
| maker-6-augustus-gene-70.35-mRNA-1 | NA | Indica | CC-Kinase-TM | Os06g0232100 | OsR498G0611940400.01.T04 | Serine/threonine-protein kinase CTR1                                  |
| maker-6-augustus-gene-71.0-mRNA-1  | NA | NA     |              | 0            | OsR498G0611948900.01.T01 |                                                                       |
| maker-6-augustus-gene-71.13-mRNA-1 | NA | NA     |              | 0            | OsR498G0611945600.01.T07 |                                                                       |
| maker-6-augustus-gene-71.16-mRNA-1 | NA | NA     |              | Os06g0233400 | OsR498G0611948000.01.T01 | Defective in cullin neddylation protein (Fragment)                    |
| maker-6-augustus-gene-71.2-mRNA-1  | NA | NA     |              | Os06g0234100 | OsR498G0611951500.01.T06 | Protease Do-like protein 9                                            |
| maker-6-augustus-gene-71.21-mRNA-1 | NA | NA     |              | Os06g0233800 | OsR498G0611949400.01.T01 | Serine/threonine-protein kinase WNK (With No Lysine)-related          |
| maker-6-augustus-gene-71.9-mRNA-1  | NA | NA     |              | Os06g0232600 | OsR498G0611945200.01.T03 | Dehydroascorbate reductase                                            |
| maker-6-augustus-gene-72.41-mRNA-1 | NA | NA     |              | Os06g0234200 | OsR498G0611952100.01.T04 | Rac-like GTP-binding protein 3                                        |
| maker-6-augustus-gene-72.44-mRNA-1 | NA | NA     |              | Os06g0235300 | OsR498G0611957100.01.T03 | S phase cyclin A-associated protein in the endoplasmic reticulum      |
| maker-6-augustus-gene-72.48-mRNA-1 | NA | Indica |              | Os06g0234600 | OsR498G0611953000.01.T01 | Leaf senescence protein-like                                          |
| maker-6-augustus-gene-72.49-mRNA-1 | NA | Indica |              | Os06g0234600 | OsR498G0611953800.01.T01 | Leaf senescence protein-like                                          |
| maker-6-augustus-gene-72.52-mRNA-1 | NA | Indica |              | Os07g0256700 | OsR498G0611955400.01.T01 | Leaf senescence protein-like                                          |
| maker-6-augustus-gene-72.54-mRNA-1 | NA | Indica |              | Os06g0235200 | OsR498G0611957000.01.T01 | Protein ALTERED XYLOGLUCAN 4                                          |
| maker-6-augustus-gene-72.56-mRNA-1 | NA | NA     |              | Os06g0235500 |                          | Protein LOW PSII ACCUMULATION 1 chloroplastic                         |
| maker-6-augustus-gene-73.8-mRNA-1  | NA | NA     |              | 0            | OsR498G0611959400.01.T02 | RING-type domain-containing protein                                   |
| maker-6-augustus-gene-74.17-mRNA-1 | NA | Indica |              | Os06g0238300 | OsR498G0611968200.01.T02 | Cellular repressor of E1A-stimulated proteins                         |
| maker-6-augustus-gene-75.28-mRNA-1 | NA | NA     | LRR          |              |                          | LRR receptor-like serine/threonine-protein kinase ERECTA              |
| maker-6-augustus-gene-75.30-mRNA-1 | NA | NA     |              | Os11g0519100 |                          |                                                                       |
| maker-6-augustus-gene-77.30-mRNA-1 | NA | NA     |              | Os06g0244700 | OsR498G0611983500.01.T03 | Microtubule-associated protein TORTIFOLIA1                            |
| maker-6-augustus-gene-77.42-mRNA-1 | NA | NA     |              | Os06g0245600 | OsR498G0611986800.01.T03 |                                                                       |
| maker-6-augustus-gene-77.49-mRNA-1 | NA | NA     |              | 0            | OsR498G0611987200.01.T09 | Alpha-mannosidase                                                     |
| maker-6-augustus-gene-78.35-mRNA-1 | NA | NA     |              | 0            | OsR498G0611987700.01.T04 | Alanine--tRNA ligase, chloroplastic/mitochondrial                     |
| maker-6-augustus-gene-78.41-mRNA-1 | NA | NA     |              | Os06g0245900 | OsR498G0611988700.01.T01 | Transcription factor E2F7                                             |
| maker-6-augustus-gene-78.43-mRNA-1 | NA | NA     |              | Os06g0246500 | OsR498G0611990500.01.T01 | Pyruvate dehydrogenase E1 component subunit alpha                     |
| maker-6-augustus-gene-78.50-mRNA-1 | NA | Indica |              | Os06g0247200 | OsR498G0611994900.01.T01 | Fe2OG dioxygenase domain-containing protein                           |
| maker-6-augustus-gene-78.57-mRNA-1 | NA | NA     |              | Os06g0246000 | OsR498G0611989000.01.T01 | G-box binding protein-like                                            |
| maker-6-augustus-gene-78.59-mRNA-1 | NA | NA     |              | 0            | OsR498G0611990000.01.T01 | Formin-like protein 14                                                |
| maker-6-augustus-gene-78.63-mRNA-1 | NA | NA     |              | Os06g0247500 | OsR498G0611995400.01.T01 | Pyrophosphate--fructose 6-phosphate 1-phosphotransferase subunit beta |
| maker-6-augustus-gene-78.69-mRNA-1 | NA | Indica |              | Os06g0247900 | OsR498G0611997000.01.T02 | Endoglucanase                                                         |
| maker-6-augustus-gene-79.35-mRNA-1 | NA | Indica |              | Os06g0248400 | OsR498G0611999900.01.T02 | Poly [ADP-ribose] polymerase                                          |
| maker-6-augustus-gene-79.41-mRNA-1 | NA | NA     |              |              |                          | FAR1 domain-containing protein                                        |
| maker-6-augustus-gene-8.45-mRNA-1  | NA | Indica |              | Os02g0128600 | OsR498G0611506300.01.T02 | ADP-ribosylation factor B1B                                           |
| maker-6-augustus-gene-8.48-mRNA-1  | NA | NA     | NBS-TM       | Os06g0114600 | OsR498G0611507900.01.T02 | Gluconate kinase                                                      |

|                                    |    |          |               |              |                          |                                                                              |
|------------------------------------|----|----------|---------------|--------------|--------------------------|------------------------------------------------------------------------------|
| maker-6-augustus-gene-8.51-mRNA-1  | NA | Indica   |               | Os06g0114650 | OsR498G0611508100.01.T01 | Glucokinase                                                                  |
| maker-6-augustus-gene-8.54-mRNA-1  | NA | Indica   |               | Os06g0115100 | OsR498G0611509300.01.T02 | Ozone-responsive stress related protein                                      |
| maker-6-augustus-gene-8.63-mRNA-1  | NA | NA       |               | Os06g0114000 | OsR498G0611505800.01.T02 | RuBisCO large subunit-binding protein subunit beta                           |
| maker-6-augustus-gene-8.69-mRNA-1  | NA | Indica   |               | Os06g0114400 | OsR498G0611507200.01.T01 |                                                                              |
| maker-6-augustus-gene-8.71-mRNA-1  | NA | NA       |               | Os06g0114500 | OsR498G0611507600.01.T03 | Ozone-responsive stress related protein                                      |
| maker-6-augustus-gene-8.73-mRNA-1  | NA | NA       |               | Os06g0114700 | OsR498G0611508400.01.T01 | Squalene monooxygenase 2                                                     |
| maker-6-augustus-gene-80.0-mRNA-1  | NA | NA       |               |              |                          | F-box domain-containing protein (Fragment)                                   |
| maker-6-augustus-gene-80.1-mRNA-1  | NA | NA       |               | 0            | OsR498G0612009500.01.T05 | ThiF domain-containing protein                                               |
| maker-6-augustus-gene-80.12-mRNA-1 | NA | NA       |               | 0            | OsR498G0612008200.01.T01 | Potassium channel SKOR                                                       |
| maker-6-augustus-gene-81.47-mRNA-1 | NA | Indica   | Kinase-TM     | Os10g0441900 | OsR498G0612016600.01.T01 | Putative receptor kinase Lecrk                                               |
| maker-6-augustus-gene-81.48-mRNA-1 | NA | NA       |               | Os06g0253600 | OsR498G0612017400.01.T01 | Cysteine-rich repeat secretory protein 12                                    |
| maker-6-augustus-gene-82.21-mRNA-1 | NA | NA       |               | 0            | OsR498G0612021100.01.T03 | Chromatin structure-remodeling complex protein SYD                           |
| maker-6-augustus-gene-82.29-mRNA-1 | NA | NA       |               | Os06g0255700 | OsR498G0612023500.01.T03 | Protein CHROMATIN REMODELING 35                                              |
| maker-6-augustus-gene-82.33-mRNA-1 | NA | Indica   |               | Os06g0254700 | OsR498G0612019400.01.T04 | probable peroxxygenase 5                                                     |
| maker-6-augustus-gene-82.40-mRNA-1 | NA | Japonica |               | Os06g0255100 | OsR498G0612021000.01.T01 | Fe2OG dioxygenase domain-containing protein                                  |
| maker-6-augustus-gene-83.0-mRNA-1  | NA | Indica   |               | Os06g0255900 | OsR498G0612024500.01.T01 | Exocyst subunit Exo70 family protein (Fragment)                              |
| maker-6-augustus-gene-83.21-mRNA-1 | NA | NA       |               | Os06g0256200 | OsR498G0612025400.01.T02 | Putative chromatin target of PRMT1 protein                                   |
| maker-6-augustus-gene-83.3-mRNA-1  | NA | NA       |               | 0            | OsR498G0612025100.01.T02 | Cnd3 domain-containing protein (Fragment)                                    |
| maker-6-augustus-gene-83.6-mRNA-1  | NA | NA       |               | Os06g0256300 | OsR498G0612026500.01.T02 | Putative mono-/di-acylglycerol lipase, alpha/Beta hydrolase                  |
| maker-6-augustus-gene-83.9-mRNA-1  | NA | NA       |               | Os06g0256500 | OsR498G0612027700.01.T07 | Glucose-6-phosphate isomerase                                                |
| maker-6-augustus-gene-84.39-mRNA-1 | NA | NA       |               | Os06g0257600 | OsR498G0612032300.01.T01 | GDLS esterase/lipase                                                         |
| maker-6-augustus-gene-88.38-mRNA-1 | NA | NA       |               | Os06g0264500 | OsR498G0612057700.01.T01 | Peptide transporter PTR5                                                     |
| maker-6-augustus-gene-88.44-mRNA-1 | NA | NA       |               | Os06g0264900 | OsR498G0612059200.01.T03 | Carbon catabolite repressor protein 4 homolog 3                              |
| maker-6-augustus-gene-88.51-mRNA-1 | NA | NA       |               | Os06g0265000 | OsR498G0612059400.01.T02 | Asparagine synthetase [glutamine-hydrolyzing]                                |
| maker-6-augustus-gene-89.0-mRNA-1  | NA | Indica   |               | Os06g0272800 | OsR498G0612082600.01.T01 | Leaf senescence protein-like                                                 |
| maker-6-augustus-gene-89.16-mRNA-1 | NA | NA       |               | Os06g0267400 | OsR498G0612064600.01.T01 |                                                                              |
| maker-6-augustus-gene-89.3-mRNA-1  | NA | Indica   |               | Os06g0267500 | OsR498G0612065100.01.T01 | NAC domain-containing protein 8                                              |
| maker-6-augustus-gene-9.13-mRNA-1  | NA | Indica   |               | Os06g0116600 | OsR498G0611513900.01.T05 | Multiple organellar RNA editing factor 2 chloroplastic                       |
| maker-6-augustus-gene-9.17-mRNA-1  | NA | NA       |               | Os06g0115300 | OsR498G0611510400.01.T01 | Acyl-CoA-binding                                                             |
| maker-6-augustus-gene-9.19-mRNA-1  | NA | NA       |               | Os06g0115400 | OsR498G0611510600.01.T01 | Superoxide dismutase                                                         |
| maker-6-augustus-gene-9.24-mRNA-1  | NA | NA       |               | Os06g0115500 | OsR498G0611510800.01.T01 | 60S ribosomal protein L13                                                    |
| maker-6-augustus-gene-9.27-mRNA-1  | NA | Indica   |               | Os07g0159500 | OsR498G0611511400.01.T01 | Putative arylformamidase                                                     |
| maker-6-augustus-gene-9.3-mRNA-1   | NA | NA       | Kinase-TM     | Os06g0116100 | OsR498G0611512100.01.T03 | GAMYB-binding protein                                                        |
| maker-6-augustus-gene-9.30-mRNA-1  | NA | NA       |               | Os06g0116200 | OsR498G0611512600.01.T03 | Growth-regulating factor                                                     |
| maker-6-augustus-gene-9.33-mRNA-1  | NA | Indica   |               | Os06g0116300 | OsR498G0611513200.01.T02 | Syntaxin-43                                                                  |
| maker-6-augustus-gene-9.38-mRNA-1  | NA | NA       |               | Os06g0116400 | OsR498G0611513600.01.T01 | Nickel/cobalt transporter, high-affinity                                     |
| maker-6-augustus-gene-9.40-mRNA-1  | NA | NA       |               | Os06g0116800 | OsR498G0611514400.01.T02 | Gametophytic factor 2                                                        |
| maker-6-augustus-gene-9.8-mRNA-1   | NA | Indica   |               | Os02g0102800 | OsR498G0611513700.01.T01 | APOSTART                                                                     |
| maker-6-augustus-gene-90.34-mRNA-1 | NA | NA       |               | Os06g0268700 |                          | Aspartyl protease APCB1                                                      |
| maker-6-augustus-gene-90.36-mRNA-1 | NA | NA       |               | 0            | OsR498G0612070200.01.T02 | Aluminum-activated malate transporter 9                                      |
| maker-6-augustus-gene-91.0-mRNA-1  | NA | NA       |               | 0            | OsR498G0612071100.01.T02 | EamA domain-containing protein                                               |
| maker-6-augustus-gene-91.6-mRNA-1  | NA | NA       |               | Os06g0270200 | OsR498G0612074400.01.T02 | Potassium transporter                                                        |
| maker-6-augustus-gene-92.12-mRNA-1 | NA | NA       | Kinase-LRR-TM | Os06g0272000 | OsR498G0612078200.01.T01 | Receptor kinase MRKa                                                         |
| maker-6-augustus-gene-92.18-mRNA-1 | NA | Japonica |               | Os06g0272900 | OsR498G0612082800.01.T01 | Leaf senescence protein-like                                                 |
| maker-6-augustus-gene-92.6-mRNA-1  | NA | NA       |               | 0            | OsR498G0407658300.01.T01 | Amidase domain-containing protein                                            |
| maker-6-augustus-gene-93.28-mRNA-1 | NA | NA       |               | Os06g0274000 | OsR498G0612084700.01.T01 | Heat shock factor binding                                                    |
| maker-6-augustus-gene-93.31-mRNA-1 | NA | NA       |               | Os06g0274200 | OsR498G0612085100.01.T01 | Ribonucloprotein (Fragment)                                                  |
| maker-6-augustus-gene-93.36-mRNA-1 | NA | Indica   | LRR-TM        | Os06g0274500 | OsR498G0612087300.01.T01 | Somatic embryogenesis receptor kinase 1-like                                 |
| maker-6-augustus-gene-93.48-mRNA-1 | NA | NA       |               | Os06g0273800 | OsR498G0612084600.01.T03 | Signal peptidase I                                                           |
| maker-6-augustus-gene-93.67-mRNA-1 | NA | NA       |               | Os06g0274800 | OsR498G0612088200.01.T01 | Peroxidase                                                                   |
| maker-6-augustus-gene-94.12-mRNA-1 | NA | NA       |               | Os06g0275800 | OsR498G0612095700.01.T02 | amino acid transporter AVT6A                                                 |
| maker-6-augustus-gene-94.15-mRNA-1 | NA | NA       |               | Os06g0275900 | OsR498G0612096100.01.T01 | Kanadaplin                                                                   |
| maker-6-augustus-gene-94.21-mRNA-1 | NA | NA       |               | Os06g0275700 | OsR498G0612093400.01.T03 | RING-type E3 ubiquitin transferase                                           |
| maker-6-augustus-gene-94.6-mRNA-1  | NA | NA       |               | Os06g0275600 | OsR498G0612093100.01.T03 | Transcription factor bHLH62 isoform A                                        |
| maker-6-augustus-gene-95.0-mRNA-1  | NA | Indica   |               | Os01g0550800 | OsR498G0612116600.01.T01 | Carboxyl-terminal peptidase-like                                             |
| maker-6-augustus-gene-97.0-mRNA-1  | NA | Indica   |               | Os03g0615700 | OsR498G0613178300.01.T01 | GRF zinc finger family protein, expressed                                    |
| maker-6-augustus-gene-97.2-mRNA-1  | NA | NA       |               | Os06g0281300 | OsR498G0612134400.01.T01 | O-methyltransferase ZRP4                                                     |
| maker-6-augustus-gene-97.4-mRNA-1  | NA | NA       |               | 0            | OsR498G0612134800.01.T05 | DNA topoisomerase                                                            |
| maker-6-augustus-gene-98.0-mRNA-1  | NA | NA       |               | Os06g0283200 | OsR498G0612142500.01.T01 | PHD and RING finger domain-containing protein 1                              |
| maker-6-augustus-gene-98.2-mRNA-1  | NA | NA       | Kinase-TM     | Os06g0283300 | OsR498G0612142700.01.T02 | probable leucine-rich repeat receptor-like serine/threonine-protein kinase A |
| maker-7-augustus-gene-0.17-mRNA-1  | NA | NA       |               | 0            | OsR498G0713353700.01.T04 | Sulfoquinovosyl transferase                                                  |

|                                     |    |          |               |              |                          |                                                                                 |
|-------------------------------------|----|----------|---------------|--------------|--------------------------|---------------------------------------------------------------------------------|
| maker-7-augustus-gene-0.22-mRNA-1   | NA | Indica   |               | Os07g0100500 | OsR498G0713353900.01.T02 | Putative calcium-binding protein CML27                                          |
| maker-7-augustus-gene-0.28-mRNA-1   | NA | NA       |               | Os07g0100800 | OsR498G0713355200.01.T04 | Proline transporter                                                             |
| maker-7-augustus-gene-0.30-mRNA-1   | NA | NA       |               | Os07g0101000 | OsR498G0713356000.01.T01 | Laccase                                                                         |
| maker-7-augustus-gene-0.32-mRNA-1   | NA | Indica   |               | Os07g0101101 | OsR498G0713357000.01.T04 |                                                                                 |
| maker-7-augustus-gene-1.34-mRNA-1   | NA | NA       |               | Os07g0101300 |                          | BHLH domain-containing protein                                                  |
| maker-7-augustus-gene-1.36-mRNA-1   | NA | NA       |               | Os07g0101500 | OsR498G0713358100.01.T04 | Aldehyde oxygenase (deformylating)                                              |
| maker-7-augustus-gene-1.38-mRNA-1   | NA | Indica   |               | Os07g0102100 | OsR498G0713359500.01.T01 | High-affinity potassium transporter                                             |
| maker-7-augustus-gene-1.40-mRNA-1   | NA | NA       |               | Os07g0101400 | OsR498G0713357600.01.T01 | BTB/POZ and MATH domain-containing protein 3                                    |
| maker-7-augustus-gene-1.42-mRNA-1   | NA | NA       |               |              |                          | Tetraacyldisaccharide 4'-kinase                                                 |
| maker-7-augustus-gene-1.46-mRNA-1   | NA | Japonica |               | Os07g0102200 | OsR498G0713360000.01.T01 | Myosin heavy chain-related                                                      |
| maker-7-augustus-gene-1.48-mRNA-1   | NA | Japonica |               | Os07g0102300 | OsR498G0713360600.01.T05 | Putative GPI-anchored protein isoform A                                         |
| maker-7-augustus-gene-1.53-mRNA-1   | NA | NA       |               | Os07g0102400 | OsR498G0713360800.01.T01 | Tobamovirus multiplication protein like                                         |
| maker-7-augustus-gene-1.56-mRNA-1   | NA | NA       |               | Os07g0102500 | OsR498G0713361200.01.T01 | HTH La-type RNA-binding domain-containing protein (Fragment)                    |
| maker-7-augustus-gene-1.58-mRNA-1   | NA | NA       |               | Os01g0946800 | OsR498G1018926400.01.T01 | Ulp1 protease family, C-terminal catalytic domain containing protein            |
| maker-7-augustus-gene-108.6-mRNA-1  | NA | NA       |               |              |                          | Ulp1 protease family, C-terminal catalytic domain containing protein, expressed |
| maker-7-augustus-gene-11.4-mRNA-1   | NA | NA       |               | 0            | OsR498G0713455600.01.T01 | Putative 26S proteasome non-ATPase regulatory subunit                           |
| maker-7-augustus-gene-12.54-mRNA-1  | NA | NA       | Kinase-TM     | Os07g0131000 |                          | L-type lectin-domain containing receptor kinase IV.1                            |
| maker-7-augustus-gene-120.23-mRNA-1 | NA | NA       |               | Os07g0405100 | OsR498G0714070300.01.T08 | WD40 domain-containing protein/LisH domain-containing protein                   |
| maker-7-augustus-gene-122.43-mRNA-1 | NA | NA       |               | Os07g0407350 |                          |                                                                                 |
| maker-7-augustus-gene-123.24-mRNA-1 | NA | NA       |               | 0            | OsR498G0407881700.01.T01 | Transposon protein, putative, Mutator sub-class, expressed                      |
| maker-7-augustus-gene-13.4-mRNA-1   | NA | Indica   |               | Os07g0133700 | OsR498G0713467300.01.T04 | Peptidylprolyl isomerase                                                        |
| maker-7-augustus-gene-132.0-mRNA-1  | NA | NA       |               |              |                          | Heteroglycan glucosidase 1                                                      |
| maker-7-augustus-gene-139.25-mRNA-1 | NA | NA       |               | Os07g0429700 | OsR498G0714152700.01.T01 |                                                                                 |
| maker-7-augustus-gene-139.27-mRNA-1 | NA | NA       |               | Os07g0432201 | OsR498G0714152700.01.T01 |                                                                                 |
| maker-7-augustus-gene-139.28-mRNA-1 | NA | NA       |               | Os05g0267732 | OsR498G0510213400.01.T01 |                                                                                 |
| maker-7-augustus-gene-14.30-mRNA-1  | NA | NA       |               | 0            | OsR498G0713471500.01.T01 | Metallophos domain-containing protein                                           |
| maker-7-augustus-gene-14.37-mRNA-1  | NA | NA       | Kinase-LRR-TM | 0            | OsR498G0713472300.01.T02 | Putative LRR receptor-like serine/threonine-protein kinase                      |
| maker-7-augustus-gene-14.40-mRNA-1  | NA | Japonica |               | Os07g0134700 | OsR498G0713472500.01.T01 | Embryo defective 2219                                                           |
| maker-7-augustus-gene-14.43-mRNA-1  | NA | Indica   | Kinase-LRR-TM | Os07g0134200 | OsR498G0713470200.01.T01 | Leucine-rich repeat receptor-like serine/threonine-protein kinase BAM1          |
| maker-7-augustus-gene-14.45-mRNA-1  | NA | NA       |               | 0            | OsR498G0713471200.01.T01 | probable UDP-3-O-acylglucosamine N-acyltransferase 2, mitochondrial             |
| maker-7-augustus-gene-14.50-mRNA-1  | NA | NA       |               | Os07g0134800 | OsR498G0713472800.01.T01 | Succinate dehydrogenase [ubiquinone] flavoprotein subunit, mitochondrial        |
| maker-7-augustus-gene-140.33-mRNA-1 | NA | NA       |               | 0            | OsR498G0510209200.01.T01 |                                                                                 |
| maker-7-augustus-gene-148.0-mRNA-1  | NA | NA       | CC-NBS-TM     |              |                          | Mitogen-activated protein kinase kinase 1                                       |
| maker-7-augustus-gene-15.49-mRNA-1  | NA | NA       |               | Os07g0136300 | OsR498G0713476700.01.T01 |                                                                                 |
| maker-7-augustus-gene-15.51-mRNA-1  | NA | NA       |               | 0            | OsR498G0713477900.01.T02 |                                                                                 |
| maker-7-augustus-gene-15.55-mRNA-1  | NA | NA       |               | Os07g0136866 |                          |                                                                                 |
| maker-7-augustus-gene-15.58-mRNA-1  | NA | Indica   |               | Os07g0139500 | OsR498G0713479300.01.T02 |                                                                                 |
| maker-7-augustus-gene-15.60-mRNA-1  | NA | NA       |               | Os07g0137200 | OsR498G0713479900.01.T01 |                                                                                 |
| maker-7-augustus-gene-15.62-mRNA-1  | NA | NA       |               |              |                          |                                                                                 |
| maker-7-augustus-gene-15.64-mRNA-1  | NA | NA       |               |              |                          | DUF295 domain-containing protein                                                |
| maker-7-augustus-gene-15.66-mRNA-1  | NA | Japonica | Kinase-TM     | Os07g0137800 | OsR498G0713481800.01.T01 | Proline-rich receptor-like protein kinase PERK4                                 |
| maker-7-augustus-gene-150.31-mRNA-1 | NA | NA       |               | Os07g0448100 | OsR498G0714192100.01.T01 | Aquaporin PIP2-4                                                                |
| maker-7-augustus-gene-150.32-mRNA-1 | NA | Indica   |               | Os07g0448100 | OsR498G0714192300.01.T01 | PIP aquaporin                                                                   |
| maker-7-augustus-gene-151.4-mRNA-1  | NA | Indica   |               | Os07g0450225 | OsR498G0408173900.01.T01 |                                                                                 |
| maker-7-augustus-gene-16.12-mRNA-1  | NA | Indica   |               | Os03g0777000 | OsR498G0713483300.01.T01 | Transcription factor JUNGBRUNNEN 1                                              |
| maker-7-augustus-gene-16.14-mRNA-1  | NA | NA       |               | 0            | OsR498G0713483900.01.T01 | RRM domain-containing protein                                                   |
| maker-7-augustus-gene-16.16-mRNA-1  | NA | NA       |               | 0            | OsR498G0713486000.01.T01 |                                                                                 |
| maker-7-augustus-gene-16.5-mRNA-1   | NA | NA       |               | Os07g0138100 | OsR498G0713482700.01.T06 | PH domain-containing protein                                                    |
| maker-7-augustus-gene-164.26-mRNA-1 | NA | NA       |               | Os07g0437500 | OsR498G0714162100.01.T05 | Pyridoxal phosphate-dependent decarboxylase                                     |
| maker-7-augustus-gene-164.29-mRNA-1 | NA | NA       |               | Os08g0371476 | OsR498G0815932400.01.T03 | Carotenoid cleavage dioxygenase like b                                          |
| maker-7-augustus-gene-164.31-mRNA-1 | NA | NA       | Kinase-TM     |              |                          | Serine/threonine-protein kinase SRPK                                            |
| maker-7-augustus-gene-164.34-mRNA-1 | NA | NA       |               | Os07g0472300 | OsR498G0714275200.01.T01 |                                                                                 |
| maker-7-augustus-gene-167.38-mRNA-1 | NA | Indica   | Kinase-TM     | Os07g0472400 | OsR498G0714275700.01.T01 | probable serine/threonine-protein kinase sky1                                   |
| maker-7-augustus-gene-167.49-mRNA-1 | NA | NA       |               | Os07g0472300 | OsR498G0714275200.01.T01 |                                                                                 |
| maker-7-augustus-gene-168.8-mRNA-1  | NA | Japonica |               | Os07g0513300 | OsR498G0100612800.01.T01 | Transposable element protein, putative, MuDR                                    |
| maker-7-augustus-gene-17.59-mRNA-1  | NA | Indica   |               | Os07g0139500 | OsR498G0713488000.01.T01 | Myb domain protein 4r1                                                          |
| maker-7-augustus-gene-17.65-mRNA-1  | NA | NA       |               | Os07g0141100 | OsR498G0713492400.01.T01 | G-type lectin S-receptor-like serine/threonine-protein kinase                   |
| maker-7-augustus-gene-17.67-mRNA-1  | NA | NA       | Kinase-TM     | Os06g0241100 | OsR498G0713492600.01.T02 | G-type lectin S-receptor-like serine/threonine-protein kinase                   |
| maker-7-augustus-gene-17.69-mRNA-1  | NA | NA       |               | Os07g0141400 | OsR498G0713493200.01.T01 | Photosystem II oxygen-evolving enhancer protein 2                               |
| maker-7-augustus-gene-17.71-mRNA-1  | NA | NA       | LRR-NBS       | Os07g0141700 |                          | Disease resistance protein RPM1                                                 |
| maker-7-augustus-gene-171.26-mRNA-1 | NA | NA       |               | Os07g0479100 | OsR498G0714302100.01.T07 | NEP1-interacting protein 2                                                      |

|                                     |    |          |               |              |                          |                                                                         |
|-------------------------------------|----|----------|---------------|--------------|--------------------------|-------------------------------------------------------------------------|
| maker-7-augustus-gene-177.0-mRNA-1  | NA | Japonica |               | Os07g0486700 | OsR498G0714323900.01.T01 | Glycosyltransferase                                                     |
| maker-7-augustus-gene-178.0-mRNA-1  | NA | NA       |               | 0            | OsR498G0714327900.01.T01 | Fatty acyl-CoA reductase                                                |
| maker-7-augustus-gene-178.2-mRNA-1  | NA | NA       |               | Os07g0489800 | OsR498G0714331100.01.T02 | Photosynthetic NDH subunit of subcomplex B 3 chloroplastic              |
| maker-7-augustus-gene-179.0-mRNA-1  | NA | NA       |               | Os07g0490400 | OsR498G0714335100.01.T03 | Peptidylprolyl isomerase                                                |
| maker-7-augustus-gene-179.11-mRNA-1 | NA | NA       |               |              |                          | Protein VASCULAR ASSOCIATED DEATH 1 chloroplastic                       |
| maker-7-augustus-gene-179.17-mRNA-1 | NA | NA       |               | Os07g0490200 | OsR498G0714334200.01.T01 | Calmodulin-binding transcription activator 5                            |
| maker-7-augustus-gene-179.18-mRNA-1 | NA | Indica   |               | Os07g0490200 | OsR498G0714334200.01.T06 | Calmodulin-binding transcription activator CBT                          |
| maker-7-augustus-gene-179.3-mRNA-1  | NA | NA       |               |              |                          | Nucleobase-ascorbate transporter 11                                     |
| maker-7-augustus-gene-179.31-mRNA-1 | NA | NA       |               | 0            | OsR498G0714335000.01.T03 | Ubiquinol-cytochrome-c reductase complex assembly factor 1              |
| maker-7-augustus-gene-179.34-mRNA-1 | NA | NA       |               | Os07g0490600 | OsR498G0714336400.01.T01 | Zn-finger, RanBP-type, containing protein                               |
| maker-7-augustus-gene-179.40-mRNA-1 | NA | NA       |               | 0            | OsR498G0714337200.01.T02 | COP9 signalosome complex subunit                                        |
| maker-7-augustus-gene-179.8-mRNA-1  | NA | NA       |               | Os07g0490700 | OsR498G0714336900.01.T03 | Vacuolar protein sorting-associated protein 1                           |
| maker-7-augustus-gene-18.45-mRNA-1  | NA | NA       |               | 0            | OsR498G0713496700.01.T02 | FBD domain-containing protein                                           |
| maker-7-augustus-gene-18.47-mRNA-1  | NA | NA       |               | Os07g0142900 | OsR498G0713496900.01.T02 | Oxidoreductase                                                          |
| maker-7-augustus-gene-18.52-mRNA-1  | NA | NA       |               | Os07g0143000 | OsR498G0713497100.01.T02 | Putative oxidoreductase, chloroplastic isoform E                        |
| maker-7-augustus-gene-18.56-mRNA-1  | NA | NA       |               | Os07g0143200 | OsR498G0713498100.01.T03 | BHLH domain-containing protein                                          |
| maker-7-augustus-gene-18.59-mRNA-1  | NA | NA       |               | 0            | OsR498G0713500700.01.T01 |                                                                         |
| maker-7-augustus-gene-18.61-mRNA-1  | NA | Indica   |               | Os07g0143600 | OsR498G0713499200.01.T01 | Cadmium-induced protein AS8                                             |
| maker-7-augustus-gene-18.64-mRNA-1  | NA | Indica   |               | Os07g0143700 | OsR498G0713499600.01.T01 | DEAD-box ATP-dependent RNA helicase like                                |
| maker-7-augustus-gene-18.69-mRNA-1  | NA | NA       |               | Os07g0143900 | OsR498G0713499800.01.T01 |                                                                         |
| maker-7-augustus-gene-180.0-mRNA-1  | NA | NA       |               |              |                          | Serine/threonine kinase-like protein                                    |
| maker-7-augustus-gene-180.2-mRNA-1  | NA | NA       |               | Os07g0491900 | OsR498G0714342200.01.T01 | Putative FAD-binding domain, FAD/NAD(P)-binding domain-containing prote |
| maker-7-augustus-gene-180.4-mRNA-1  | NA | NA       |               | Os07g0492000 | OsR498G0714342400.01.T02 | Nucleoside diphosphate kinase                                           |
| maker-7-augustus-gene-180.8-mRNA-1  | NA | NA       |               | Os07g0492100 | OsR498G0714342800.01.T02 | DNA helicase                                                            |
| maker-7-augustus-gene-181.0-mRNA-1  | NA | NA       |               | Os07g0495000 | OsR498G0714350300.01.T06 | Ureidoglycine aminohydrolase                                            |
| maker-7-augustus-gene-181.4-mRNA-1  | NA | NA       |               | Os07g0495100 | OsR498G0714350500.01.T01 | Casein kinase II subunit beta                                           |
| maker-7-augustus-gene-182.0-mRNA-1  | NA | Indica   |               | Os07g0495900 | OsR498G0714352300.01.T01 | Regulator of nonsense transcripts                                       |
| maker-7-augustus-gene-182.14-mRNA-1 | NA | Indica   |               | Os07g0496250 | OsR498G0714354100.01.T03 | Beta-expansin                                                           |
| maker-7-augustus-gene-182.8-mRNA-1  | NA | NA       |               | Os07g0496200 | OsR498G0714353900.01.T01 | Malic enzyme                                                            |
| maker-7-augustus-gene-183.14-mRNA-1 | NA | NA       |               | 0            | OsR498G0714357200.01.T02 | CHD3-type chromatin remodeling factor D                                 |
| maker-7-augustus-gene-184.0-mRNA-1  | NA | NA       |               | Os07g0499800 | OsR498G0714366700.01.T02 | RING/U-box superfamily protein                                          |
| maker-7-augustus-gene-185.37-mRNA-1 | NA | NA       |               | Os07g0500300 | OsR498G0714368300.01.T01 | Synaptotagmin-4                                                         |
| maker-7-augustus-gene-185.43-mRNA-1 | NA | Indica   |               | Os11g0270500 | OsR498G0714373200.01.T01 | Disease resistance protein RPM1                                         |
| maker-7-augustus-gene-185.46-mRNA-1 | NA | NA       | LRR-TM        | Os07g0501800 | OsR498G0714373600.01.T01 | Receptor like protein 4                                                 |
| maker-7-augustus-gene-186.28-mRNA-1 | NA | NA       |               | 0            | OsR498G0714374000.01.T05 | Transmembrane E3 ubiquitin-protein ligase 1                             |
| maker-7-augustus-gene-186.34-mRNA-1 | NA | Indica   |               | Os07g0502200 | OsR498G0714374800.01.T01 | Protein DETOXIFICATION                                                  |
| maker-7-augustus-gene-187.39-mRNA-1 | NA | NA       |               | Os07g0503700 | OsR498G0714378500.01.T01 | Eukaryotic translation initiation factor 3 subunit E                    |
| maker-7-augustus-gene-187.43-mRNA-1 | NA | NA       |               | Os11g0307600 | OsR498G1119799000.01.T01 | Protein kinase domain-containing protein                                |
| maker-7-augustus-gene-187.45-mRNA-1 | NA | NA       |               | Os11g0307600 | OsR498G1119798800.01.T01 | Enoyl-CoA hydratase/isomerase family protein, expressed                 |
| maker-7-augustus-gene-187.46-mRNA-1 | NA | NA       |               | 0            | OsR498G0714380500.01.T01 | Protein kinase domain-containing protein                                |
| maker-7-augustus-gene-187.51-mRNA-1 | NA | NA       |               | Os07g0505200 | OsR498G0714384000.01.T01 | SBP-box family member protein (Fragment)                                |
| maker-7-augustus-gene-188.30-mRNA-1 | NA | NA       |               | Os07g0506600 | OsR498G0714390500.01.T04 | Filament-like plant protein 3                                           |
| maker-7-augustus-gene-189.27-mRNA-1 | NA | NA       |               | Os07g0507700 | OsR498G0714393300.01.T02 | Bromo domain-containing protein                                         |
| maker-7-augustus-gene-189.30-mRNA-1 | NA | NA       |               |              |                          |                                                                         |
| maker-7-augustus-gene-189.32-mRNA-1 | NA | NA       |               | 0            | OsR498G0714391000.01.T01 | WD repeat-containing protein 74                                         |
| maker-7-augustus-gene-189.36-mRNA-1 | NA | NA       |               | 0            | OsR498G0714391400.01.T01 | Transposon protein, putative, Mutator sub-class                         |
| maker-7-augustus-gene-189.38-mRNA-1 | NA | NA       |               | 0            | OsR498G0714392000.01.T01 | PPM-type phosphatase domain-containing protein (Fragment)               |
| maker-7-augustus-gene-189.43-mRNA-1 | NA | NA       |               | 0            | OsR498G0714392400.01.T02 | Targeting protein for Xklp2                                             |
| maker-7-augustus-gene-189.51-mRNA-1 | NA | NA       | Kinase-TM     | Os07g0507300 | OsR498G0714392600.01.T04 | germinal center kinase 1 isoform X3                                     |
| maker-7-augustus-gene-189.60-mRNA-1 | NA | NA       |               | Os07g0507500 | OsR498G0714393000.01.T01 | Hydrolase/ protein serine/threonine phosphatase                         |
| maker-7-augustus-gene-189.66-mRNA-1 | NA | NA       |               | Os07g0508000 | OsR498G0714394000.01.T03 | RNA helicase                                                            |
| maker-7-augustus-gene-189.71-mRNA-1 | NA | NA       |               | Os07g0508300 | OsR498G0714394600.01.T01 | SH3 domain-containing protein 3                                         |
| maker-7-augustus-gene-19.28-mRNA-1  | NA | NA       |               | Os07g0144500 | OsR498G0713501900.01.T02 | Patatin-like protein 3                                                  |
| maker-7-augustus-gene-19.31-mRNA-1  | NA | NA       |               |              |                          |                                                                         |
| maker-7-augustus-gene-19.33-mRNA-1  | NA | NA       | Kinase-LRR-TM | Os07g0145400 | OsR498G0713506600.01.T01 | Tyrosine-protein kinase                                                 |
| maker-7-augustus-gene-190.24-mRNA-1 | NA | Indica   |               | Os07g0508500 | OsR498G0714394700.01.T03 | Mitotic checkpoint serine/threonine-protein kinase                      |
| maker-7-augustus-gene-190.32-mRNA-1 | NA | NA       |               | Os07g0509600 | OsR498G0714401700.01.T01 | rRNA adenine N(6)-methyltransferase                                     |
| maker-7-augustus-gene-190.34-mRNA-1 | NA | NA       |               | Os07g0510100 | OsR498G0714403500.01.T01 | Methionine aminopeptidase                                               |
| maker-7-augustus-gene-190.38-mRNA-1 | NA | Indica   |               | Os04g0610700 | OsR498G0714400000.01.T01 | Potassium transporter                                                   |
| maker-7-augustus-gene-191.29-mRNA-1 | NA | NA       |               | Os07g0510200 | OsR498G0714404300.01.T01 | Glucan endo-1,3-beta-D-glucosidase                                      |
| maker-7-augustus-gene-191.32-mRNA-1 | NA | Indica   |               | Os06g0678800 | OsR498G0714407100.01.T01 | SKU5 similar 5 isoform 1                                                |

|                                     |    |          |              |              |                          |                                                                          |
|-------------------------------------|----|----------|--------------|--------------|--------------------------|--------------------------------------------------------------------------|
| maker-7-augustus-gene-191.35-mRNA-1 | NA | NA       |              | Os07g0511000 | OsR498G0714407300.01.T01 | Rab3 GTPase-activating protein catalytic subunit                         |
| maker-7-augustus-gene-191.39-mRNA-1 | NA | Indica   |              | Os07g0510300 | OsR498G0714404600.01.T01 | Endo/exonuclease/phosphatase domain-containing protein (Fragment)        |
| maker-7-augustus-gene-192.21-mRNA-1 | NA | Indica   |              | Os07g0511500 | OsR498G0714410700.01.T03 | ATP-dependent helicase rhp16                                             |
| maker-7-augustus-gene-192.26-mRNA-1 | NA | NA       |              | 0            | OsR498G0714412700.01.T04 | Bromo domain-containing protein                                          |
| maker-7-augustus-gene-192.30-mRNA-1 | NA | NA       |              | 0            | OsR498G0714413200.01.T01 | Arogenate dehydratase/prephenate dehydratase 2 chloroplastic             |
| maker-7-augustus-gene-192.34-mRNA-1 | NA | NA       |              | Os07g0512100 | OsR498G0714413800.01.T01 | ankyrin repeat domain-containing protein 13C-A                           |
| maker-7-augustus-gene-193.0-mRNA-1  | NA | NA       |              |              |                          | Polynucleotidyl transferase ribonuclease H fold protein with HRDC domain |
| maker-7-augustus-gene-193.13-mRNA-1 | NA | NA       |              | 0            | OsR498G0714420400.01.T01 | DUF629 domain-containing protein                                         |
| maker-7-augustus-gene-193.6-mRNA-1  | NA | NA       |              | Os07g0512200 | OsR498G0714414800.01.T01 | Autophagy-related protein 8A                                             |
| maker-7-augustus-gene-193.8-mRNA-1  | NA | NA       |              | Os07g0514400 | OsR498G0714419600.01.T04 | DUF629 domain-containing protein                                         |
| maker-7-augustus-gene-194.22-mRNA-1 | NA | NA       |              |              |                          | tRNA(Phe) (4-demethylwyosine(37)-C(7)) aminocarboxypropyltransferase     |
| maker-7-augustus-gene-194.31-mRNA-1 | NA | NA       | CC-Kinase-TM | Os07g0515100 | OsR498G0714421000.01.T03 | Calcium-dependent protein kinase                                         |
| maker-7-augustus-gene-195.37-mRNA-1 | NA | Indica   |              | Os07g0515700 | OsR498G0714424710.01.T03 |                                                                          |
| maker-7-augustus-gene-195.39-mRNA-1 | NA | NA       |              | Os07g0516000 | OsR498G0714425300.01.T05 | Sialidase domain-containing protein                                      |
| maker-7-augustus-gene-195.42-mRNA-1 | NA | NA       |              | Os07g0516600 | OsR498G0714429900.01.T02 | Protein DETOXIFICATION                                                   |
| maker-7-augustus-gene-195.46-mRNA-1 | NA | Indica   |              | Os03g0569900 | OsR498G0714430500.01.T04 | Polyadenylate-binding protein RBP45                                      |
| maker-7-augustus-gene-195.51-mRNA-1 | NA | NA       |              | Os07g0517100 | OsR498G0714431500.01.T01 | 15.4 kDa class V heat shock protein-like                                 |
| maker-7-augustus-gene-195.53-mRNA-1 | NA | NA       |              | Os07g0517300 | OsR498G0714432100.01.T01 | Condensin-2 complex subunit H2                                           |
| maker-7-augustus-gene-195.58-mRNA-1 | NA | Indica   |              | Os07g0517000 | OsR498G0714430800.01.T01 | DEAD-box ATP-dependent RNA helicase                                      |
| maker-7-augustus-gene-195.62-mRNA-1 | NA | NA       |              | 0            | OsR498G0714432400.01.T01 | Binding                                                                  |
| maker-7-augustus-gene-196.37-mRNA-1 | NA | Japonica |              | Os07g0517600 | OsR498G0714433900.01.T01 | Adenosinetriphosphatase                                                  |
| maker-7-augustus-gene-196.38-mRNA-1 | NA | Japonica |              | Os07g0517600 | OsR498G0714433900.01.T01 | Adenosinetriphosphatase                                                  |
| maker-7-augustus-gene-196.43-mRNA-1 | NA | Indica   |              | Os07g0517900 | OsR498G0714435800.01.T05 | Taxane 10-beta-hydroxylase                                               |
| maker-7-augustus-gene-197.1-mRNA-1  | NA | NA       |              | Os07g0519300 | OsR498G0714440300.01.T03 | Taxane 10-beta-hydroxylase                                               |
| maker-7-augustus-gene-197.2-mRNA-1  | NA | Indica   |              | Os07g0519300 | OsR498G0714440300.01.T03 | Taxane 10-beta-hydroxylase                                               |
| maker-7-augustus-gene-197.3-mRNA-1  | NA | NA       |              | 0            | OsR498G0714440500.01.T03 |                                                                          |
| maker-7-augustus-gene-197.4-mRNA-1  | NA | Indica   |              | Os07g0519300 | OsR498G0714440500.01.T05 | Taxane 10-beta-hydroxylase                                               |
| maker-7-augustus-gene-197.5-mRNA-1  | NA | Indica   |              | Os07g0519500 | OsR498G0714441900.01.T01 | Taxane 10-beta-hydroxylase                                               |
| maker-7-augustus-gene-197.66-mRNA-1 | NA | NA       |              | 0            | OsR498G0714446500.01.T01 | Protein LHCP TRANSLOCATION DEFECT                                        |
| maker-7-augustus-gene-197.68-mRNA-1 | NA | NA       |              | Os07g0521000 | OsR498G0714447300.01.T03 | Succinate dehydrogenase subunit 3                                        |
| maker-7-augustus-gene-197.70-mRNA-1 | NA | NA       |              | 0            | OsR498G0714443800.01.T01 | Microtubule-associated protein TORTIFOLIA1                               |
| maker-7-augustus-gene-197.75-mRNA-1 | NA | NA       | LRR-TM       | 0            | OsR498G0714446800.01.T02 | Patatin                                                                  |
| maker-7-augustus-gene-198.15-mRNA-1 | NA | Indica   |              | Os07g0522900 | OsR498G0714458300.01.T01 | septum-promoting GTP-binding protein 1-like                              |
| maker-7-augustus-gene-198.2-mRNA-1  | NA | NA       |              | 0            | OsR498G0714454900.01.T01 | PDR-type ABC transporter                                                 |
| maker-7-augustus-gene-198.20-mRNA-1 | NA | NA       |              | Os07g0523700 | OsR498G1222153700.01.T02 | 60S ribosomal protein L44                                                |
| maker-7-augustus-gene-198.9-mRNA-1  | NA | Indica   |              | Os07g0522600 | OsR498G0714455300.01.T04 | Ionotropic glutamate receptor                                            |
| maker-7-augustus-gene-199.32-mRNA-1 | NA | NA       |              | Os07g0523100 | OsR498G1222153700.01.T02 | 60S ribosomal protein L44                                                |
| maker-7-augustus-gene-199.37-mRNA-1 | NA | Japonica |              | Os07g0523100 | OsR498G1222153700.01.T02 | 60S ribosomal protein L44                                                |
| maker-7-augustus-gene-199.42-mRNA-1 | NA | NA       |              |              |                          |                                                                          |
| maker-7-augustus-gene-199.44-mRNA-1 | NA | NA       |              | Os07g0524000 | OsR498G0714462100.01.T05 | Actin-related protein 8                                                  |
| maker-7-augustus-gene-199.47-mRNA-1 | NA | NA       |              | Os07g0524100 | OsR498G0714463500.01.T04 | Protein disulfide isomerase12                                            |
| maker-7-augustus-gene-199.53-mRNA-1 | NA | NA       |              | 0            | OsR498G0203764100.01.T01 | PMD domain-containing protein                                            |
| maker-7-augustus-gene-199.56-mRNA-1 | NA | NA       |              | Os02g0467500 |                          | PMD domain-containing protein                                            |
| maker-7-augustus-gene-199.58-mRNA-1 | NA | Indica   |              | Os07g0523600 | OsR498G0714459600.01.T01 | Plastid phosphate translocator                                           |
| maker-7-augustus-gene-199.63-mRNA-1 | NA | NA       |              | Os07g0524900 | OsR498G0714465200.01.T01 | Pentatricopeptide repeat-containing protein, mitochondrial               |
| maker-7-augustus-gene-199.65-mRNA-1 | NA | NA       |              | 0            | OsR498G0714466600.01.T01 |                                                                          |
| maker-7-augustus-gene-2.0-mRNA-1    | NA | NA       |              | Os07g0103100 | OsR498G0713362700.01.T01 | Glutamate receptor                                                       |
| maker-7-augustus-gene-2.12-mRNA-1   | NA | NA       |              | Os07g0158200 | OsR498G0713550700.01.T01 | Deoxyribonuclease tatD                                                   |
| maker-7-augustus-gene-2.16-mRNA-1   | NA | NA       |              |              |                          |                                                                          |
| maker-7-augustus-gene-2.17-mRNA-1   | NA | NA       |              | 0            | OsR498G0713741700.01.T01 |                                                                          |
| maker-7-augustus-gene-2.20-mRNA-1   | NA | NA       |              |              |                          |                                                                          |
| maker-7-augustus-gene-2.24-mRNA-1   | NA | NA       |              |              |                          | DDRGK domain-containing protein 1                                        |
| maker-7-augustus-gene-2.29-mRNA-1   | NA | NA       |              | Os07g0158300 | OsR498G0713551000.01.T01 | 33 kDa ribonucleoprotein chloroplastic                                   |
| maker-7-augustus-gene-2.3-mRNA-1    | NA | NA       |              | Os07g0157000 | OsR498G0713549900.01.T01 | Peroxidase                                                               |
| maker-7-augustus-gene-2.32-mRNA-1   | NA | NA       |              | Os07g0111400 | OsR498G0713390000.01.T01 | WRKY transcription factor 4                                              |
| maker-7-augustus-gene-2.5-mRNA-1    | NA | NA       |              | 0            | OsR498G0713550300.01.T05 | Deoxyribonuclease tatD                                                   |
| maker-7-augustus-gene-20.35-mRNA-1  | NA | NA       |              | Os07g0146700 |                          |                                                                          |
| maker-7-augustus-gene-20.37-mRNA-1  | NA | NA       |              | 0            | OsR498G0306743300.01.T01 | Transposon protein, putative, CACTA, En/Spm sub-class                    |
| maker-7-augustus-gene-200.40-mRNA-1 | NA | NA       |              | Os07g0525400 | OsR498G0714467900.01.T01 | Rab-GAP TBC domain-containing protein                                    |
| maker-7-augustus-gene-200.42-mRNA-1 | NA | NA       |              | Os07g0525500 | OsR498G0714468400.01.T01 | Bisdemethoxycurcumin synthase                                            |
| maker-7-augustus-gene-200.44-mRNA-1 | NA | NA       |              | Os07g0525900 | OsR498G0714469600.01.T01 | Bisdemethoxycurcumin synthase                                            |

|                                     |    |        |           |              |                          |                                                                  |
|-------------------------------------|----|--------|-----------|--------------|--------------------------|------------------------------------------------------------------|
| maker-7-augustus-gene-200.46-mRNA-1 | NA | NA     |           | Os07g0526400 | OsR498G0714472000.01.T01 | Bisdemethoxycurcumin synthase                                    |
| maker-7-augustus-gene-202.35-mRNA-1 | NA | NA     |           | Os07g0527800 | OsR498G0714477500.01.T01 | Protein ACCELERATED CELL DEATH 6                                 |
| maker-7-augustus-gene-202.41-mRNA-1 | NA | NA     |           | 0            | OsR498G0714478700.01.T01 | GDSL esterase/lipase                                             |
| maker-7-augustus-gene-202.46-mRNA-1 | NA | NA     |           | Os07g0529600 | OsR498G0714482300.01.T01 | Thiamine thiazole synthase, chloroplastic                        |
| maker-7-augustus-gene-203.0-mRNA-1  | NA | Indica |           | Os07g0529700 | OsR498G0714482500.01.T01 | Xyloglucan endotransglucosylase/hydrolase                        |
| maker-7-augustus-gene-203.10-mRNA-1 | NA | Indica |           | Os07g0531700 | OsR498G0714487700.01.T01 | NUC153 domain-containing protein (Fragment)                      |
| maker-7-augustus-gene-203.13-mRNA-1 | NA | Indica |           | Os07g0529800 | OsR498G0714482800.01.T02 | Translation initiation factor SU11                               |
| maker-7-augustus-gene-203.24-mRNA-1 | NA | NA     |           | Os07g0530700 | OsR498G0714484800.01.T02 |                                                                  |
| maker-7-augustus-gene-203.27-mRNA-1 | NA | NA     |           | Os07g0531600 | OsR498G0714487600.01.T01 | Glycerol-3-phosphate O-acyltransferase 3/4                       |
| maker-7-augustus-gene-203.3-mRNA-1  | NA | NA     |           | Os07g0530600 | OsR498G0714484500.01.T03 | Bifunctional kinase-pyrophosphorylase                            |
| maker-7-augustus-gene-204.2-mRNA-1  | NA | NA     |           | Os07g0532500 | OsR498G0714492200.01.T02 | Ankyrin repeat protein-like                                      |
| maker-7-augustus-gene-205.0-mRNA-1  | NA | NA     |           | 0            | OsR498G0714492700.01.T01 | Homeobox domain-containing protein (Fragment)                    |
| maker-7-augustus-gene-205.2-mRNA-1  | NA | NA     |           | 0            | OsR498G0714494500.01.T01 | Thylakoid lumenal 15.0 kDa protein 2 chloroplastic               |
| maker-7-augustus-gene-205.7-mRNA-1  | NA | NA     | Kinase    | 0            | OsR498G0714495300.01.T01 | G-type lectin S-receptor-like serine/threonine-protein kinase    |
| maker-7-augustus-gene-206.0-mRNA-1  | NA | Indica | Kinase-TM | Os07g0535800 | OsR498G0714500300.01.T06 | Putative serine/threonine-specific protein kinase                |
| maker-7-augustus-gene-206.10-mRNA-1 | NA | Indica | Kinase-TM | Os07g0528700 | OsR498G0714502100.01.T01 | Cysteine-rich receptor-like protein kinase 8                     |
| maker-7-augustus-gene-206.4-mRNA-1  | NA | NA     | Kinase-TM | Os07g0537000 | OsR498G0714501700.01.T01 | Receptor-like serine-threonine protein kinase                    |
| maker-7-augustus-gene-206.5-mRNA-1  | NA | NA     | Kinase-TM |              |                          | G-type lectin S-receptor-like serine/threonine-protein kinase    |
| maker-7-augustus-gene-207.50-mRNA-1 | NA | NA     | Kinase-TM | 0            | OsR498G0714502900.01.T01 | Cysteine-rich receptor-like protein kinase 8                     |
| maker-7-augustus-gene-207.52-mRNA-1 | NA | NA     | Kinase-TM | Os07g0537900 | OsR498G0714503300.01.T01 | Cysteine-rich receptor-like protein kinase 8                     |
| maker-7-augustus-gene-207.62-mRNA-1 | NA | NA     | Kinase-TM | Os07g0537500 | OsR498G0714502600.01.T01 | Cysteine-rich receptor-like protein kinase 6                     |
| maker-7-augustus-gene-207.66-mRNA-1 | NA | NA     |           | Os07g0538000 | OsR498G0714503600.01.T01 | Glucan endo-1,3-beta-D-glucosidase                               |
| maker-7-augustus-gene-207.68-mRNA-1 | NA | NA     | Kinase-TM | Os07g0538200 | OsR498G0714504000.01.T01 | Cysteine-rich receptor-like protein kinase 6                     |
| maker-7-augustus-gene-207.81-mRNA-1 | NA | NA     |           |              |                          | Glucan endo-1,3-beta-D-glucosidase                               |
| maker-7-augustus-gene-208.31-mRNA-1 | NA | Indica | Kinase-TM | Os07g0537900 | OsR498G0714510100.01.T01 | Cysteine-rich receptor-like protein kinase 8                     |
| maker-7-augustus-gene-208.36-mRNA-1 | NA | NA     | Kinase-TM | Os07g0541000 | OsR498G0714516300.01.T01 | Receptor-like serine-threonine protein kinase                    |
| maker-7-augustus-gene-208.46-mRNA-1 | NA | NA     |           | Os07g0540200 | OsR498G0714513000.01.T03 | DCD domain-containing protein (Fragment)                         |
| maker-7-augustus-gene-208.47-mRNA-1 | NA | NA     |           | 0            | OsR498G0714514000.01.T02 | DCD domain-containing protein (Fragment)                         |
| maker-7-augustus-gene-209.11-mRNA-1 | NA | NA     | Kinase-TM | Os07g0540800 | OsR498G0714515800.01.T01 | Receptor-like serine-threonine protein kinase                    |
| maker-7-augustus-gene-209.12-mRNA-1 | NA | NA     | Kinase-TM | Os07g0541000 | OsR498G0714516800.01.T01 | Cysteine-rich receptor-like protein kinase 10                    |
| maker-7-augustus-gene-209.26-mRNA-1 | NA | NA     | Kinase-TM | Os07g0541800 | OsR498G0714517600.01.T05 | Membrane binding protein                                         |
| maker-7-augustus-gene-209.3-mRNA-1  | NA | NA     |           |              |                          | Transposon protein, putative, Mutator sub-class, expressed       |
| maker-7-augustus-gene-209.30-mRNA-1 | NA | NA     | Kinase-TM | Os07g0541900 | OsR498G0714517800.01.T05 | Cysteine-rich receptor-like protein kinase 10                    |
| maker-7-augustus-gene-210.47-mRNA-1 | NA | NA     | Kinase-TM | Os07g0542400 | OsR498G0714519200.01.T05 | Putative Zea mays retrotransposon Opie-2                         |
| maker-7-augustus-gene-217.0-mRNA-1  | NA | NA     |           | 0            | OsR498G0714556100.01.T03 | Eukaryotic translation initiation factor 4G                      |
| maker-7-augustus-gene-217.13-mRNA-1 | NA | NA     |           | Os07g0556000 | OsR498G0714558200.01.T01 | Cyclin N-terminal domain-containing protein                      |
| maker-7-augustus-gene-217.5-mRNA-1  | NA | Indica |           | Os07g0555300 | OsR498G0714556700.01.T01 | MI domain-containing protein                                     |
| maker-7-augustus-gene-218.12-mRNA-1 | NA | NA     |           | Os07g0557200 | OsR498G0714562400.01.T01 | Equilibrative nucleoside transporter                             |
| maker-7-augustus-gene-218.3-mRNA-1  | NA | NA     |           |              |                          |                                                                  |
| maker-7-augustus-gene-22.12-mRNA-1  | NA | NA     |           | Os07g0150500 | OsR498G0713521200.01.T02 | C3HC-type domain-containing protein (Fragment)                   |
| maker-7-augustus-gene-22.17-mRNA-1  | NA | NA     | Kinase-TM | Os07g0150700 | OsR498G0713521400.01.T01 | Non-specific serine/threonine protein kinase                     |
| maker-7-augustus-gene-22.9-mRNA-1   | NA | NA     |           | Os07g0150100 | OsR498G0713518400.01.T01 | Early responsive to dehydration stress protein (ERD4) isoform 1  |
| maker-7-augustus-gene-220.0-mRNA-1  | NA | NA     |           | Os07g0562700 | OsR498G0714578700.01.T01 | Chlorophyll a-b binding protein of LHClI type III, chloroplastic |
| maker-7-augustus-gene-221.41-mRNA-1 | NA | NA     |           | Os07g0562800 | OsR498G0714579000.01.T05 | Myosin-1 isoform A                                               |
| maker-7-augustus-gene-221.42-mRNA-1 | NA | Indica |           | Os07g0562800 | OsR498G0714579000.01.T01 | Myosin-2                                                         |
| maker-7-augustus-gene-221.48-mRNA-1 | NA | NA     |           | Os07g0562700 | OsR498G0714578700.01.T01 | Chlorophyll a-b binding protein of LHClI type III, chloroplastic |
| maker-7-augustus-gene-221.53-mRNA-1 | NA | NA     |           | 0            | OsR498G0714581100.01.T03 | D-erythro-sphingosine kinase/ diacylglycerol kinase              |
| maker-7-augustus-gene-221.58-mRNA-1 | NA | NA     |           | Os07g0562700 | OsR498G0714578700.01.T01 | Chlorophyll a-b binding protein of LHClI type III, chloroplastic |
| maker-7-augustus-gene-221.60-mRNA-1 | NA | Indica |           | Os07g0562800 | OsR498G0714579000.01.T01 | Myosin-2                                                         |
| maker-7-augustus-gene-222.53-mRNA-1 | NA | NA     |           | Os07g0564400 |                          |                                                                  |
| maker-7-augustus-gene-223.55-mRNA-1 | NA | NA     |           | 0            | OsR498G0714586800.01.T02 | HOPM interactor 7                                                |
| maker-7-augustus-gene-223.68-mRNA-1 | NA | NA     |           | Os07g0565000 | OsR498G0714587600.01.T01 | Ribosomal protein S11-beta                                       |
| maker-7-augustus-gene-227.17-mRNA-1 | NA | NA     |           | 0            | OsR498G0714607800.01.T02 | Vacuole membrane 1                                               |
| maker-7-augustus-gene-227.20-mRNA-1 | NA | NA     |           | Os07g0571600 | OsR498G0714608200.01.T01 | Chalcone--flavonone isomerase                                    |
| maker-7-augustus-gene-227.25-mRNA-1 | NA | NA     |           | Os07g0571700 | OsR498G0714608600.01.T01 | Organic cation/carnitine transporter 7                           |
| maker-7-augustus-gene-227.27-mRNA-1 | NA | NA     |           | Os07g0571900 | OsR498G0714609200.01.T01 | Pre-mRNA-splicing factor 18                                      |
| maker-7-augustus-gene-227.3-mRNA-1  | NA | NA     |           | Os07g0572000 | OsR498G0714609300.01.T01 | COMPASS-like H3K4 histone methylase component WDR5B              |
| maker-7-augustus-gene-227.5-mRNA-1  | NA | NA     |           | Os07g0572100 | OsR498G0714609700.01.T01 | Amine oxidase                                                    |
| maker-7-augustus-gene-227.9-mRNA-1  | NA | NA     |           | Os07g0572400 | OsR498G0714610700.01.T01 | Putative serine/threonine-protein kinase yzf                     |
| maker-7-augustus-gene-228.2-mRNA-1  | NA | NA     | Kinase-TM | Os07g0572800 | OsR498G0714612300.01.T06 | Serine/threonine-protein kinase WNK1                             |
| maker-7-augustus-gene-229.47-mRNA-1 | NA | Indica |           | Os07g0573300 | OsR498G0714613700.01.T01 | FYVE-type domain-containing protein (Fragment)                   |

|                                     |    |          |               |              |                          |                                                                             |
|-------------------------------------|----|----------|---------------|--------------|--------------------------|-----------------------------------------------------------------------------|
| maker-7-augustus-gene-23.25-mRNA-1  | NA | Japonica |               | Os07g0151700 | OsR498G0713527500.01.T01 |                                                                             |
| maker-7-augustus-gene-23.29-mRNA-1  | NA | NA       |               | Os07g0151800 | OsR498G0713527800.01.T01 |                                                                             |
| maker-7-augustus-gene-231.45-mRNA-1 | NA | Japonica |               | Os07g0577400 | OsR498G0714623100.01.T05 | Constitutive photomorphogenesis protein 10                                  |
| maker-7-augustus-gene-232.11-mRNA-1 | NA | Indica   |               | Os07g0580200 | OsR498G0714631800.01.T01 |                                                                             |
| maker-7-augustus-gene-232.14-mRNA-1 | NA | NA       |               | Os07g0580500 | OsR498G0714632200.01.T01 | Protein BRASSINAZOLE-RESISTANT 2                                            |
| maker-7-augustus-gene-232.16-mRNA-1 | NA | NA       |               | Os07g0580900 | OsR498G0714634400.01.T03 | Geranyl diphosphate synthase large subunit                                  |
| maker-7-augustus-gene-232.4-mRNA-1  | NA | NA       |               | Os07g0578800 | OsR498G0714628800.01.T03 | Pentatricopeptide repeat-containing protein, mitochondrial                  |
| maker-7-augustus-gene-232.5-mRNA-1  | NA | NA       |               | Os07g0578800 |                          |                                                                             |
| maker-7-augustus-gene-232.7-mRNA-1  | NA | NA       |               | 0            | OsR498G0714630400.01.T01 |                                                                             |
| maker-7-augustus-gene-232.9-mRNA-1  | NA | Japonica |               | Os07g0580200 | OsR498G0714631800.01.T01 |                                                                             |
| maker-7-augustus-gene-238.10-mRNA-1 | NA | NA       |               | Os07g0591700 | OsR498G0714680900.01.T01 |                                                                             |
| maker-7-augustus-gene-239.12-mRNA-1 | NA | NA       |               | Os07g0592600 | OsR498G0714682600.01.T01 | Indole-3-acetic acid-amido synthetase GH3.8                                 |
| maker-7-augustus-gene-239.7-mRNA-1  | NA | NA       |               | Os07g0592200 |                          | Aspartic proteinase-like protein 2                                          |
| maker-7-augustus-gene-24.26-mRNA-1  | NA | Japonica |               | Os07g0152700 | OsR498G0713532700.01.T02 | Glutathione S-transferase                                                   |
| maker-7-augustus-gene-24.29-mRNA-1  | NA | NA       |               | Os07g0152800 | OsR498G0713533300.01.T08 | Peroxin-13                                                                  |
| maker-7-augustus-gene-24.32-mRNA-1  | NA | NA       |               | Os07g0152900 | OsR498G0713533300.01.T09 | (S)-2-hydroxy-acid oxidase                                                  |
| maker-7-augustus-gene-24.35-mRNA-1  | NA | NA       | Kinase-LRR-TM | 0            | OsR498G0713530800.01.T02 | Leucine-rich repeat receptor-like serine/threonine-protein kinase At1g17230 |
| maker-7-augustus-gene-24.37-mRNA-1  | NA | NA       |               | Os07g0153000 | OsR498G0713533800.01.T01 | Tify domain-containing protein                                              |
| maker-7-augustus-gene-24.39-mRNA-1  | NA | NA       |               |              |                          | Penicillin-insensitive transglycosylase                                     |
| maker-7-augustus-gene-24.43-mRNA-1  | NA | Indica   |               | Os07g0153300 | OsR498G0713534800.01.T02 | TBC1 domain family member 14 like                                           |
| maker-7-augustus-gene-241.0-mRNA-1  | NA | NA       |               | 0            | OsR498G0714696100.01.T01 | Mitochondrial saccharopine dehydrogenase                                    |
| maker-7-augustus-gene-241.15-mRNA-1 | NA | NA       |               |              |                          | Amino acid transporter AVT6A isoform B                                      |
| maker-7-augustus-gene-241.2-mRNA-1  | NA | NA       |               | Os07g0598000 | OsR498G0714699100.01.T01 | Dihydroflavonol-4-reductase                                                 |
| maker-7-augustus-gene-241.26-mRNA-1 | NA | NA       |               | Os07g0598500 | OsR498G0714700800.01.T01 | Pentatricopeptide repeat-containing protein mitochondrial                   |
| maker-7-augustus-gene-241.8-mRNA-1  | NA | NA       |               | Os07g0598300 | OsR498G0713503300.01.T01 | Helicase ATP-binding domain-containing protein                              |
| maker-7-augustus-gene-242.44-mRNA-1 | NA | NA       |               | Os07g0599000 | OsR498G0714702900.01.T01 | Pentatricopeptide repeat-containing protein mitochondrial                   |
| maker-7-augustus-gene-242.47-mRNA-1 | NA | NA       |               | Os07g0600700 | OsR498G0714708100.01.T01 | X8 domain-containing protein                                                |
| maker-7-augustus-gene-242.49-mRNA-1 | NA | NA       |               | Os07g0598700 | OsR498G0714702000.01.T02 | Golgin subfamily A member 4 isoform X1                                      |
| maker-7-augustus-gene-242.53-mRNA-1 | NA | NA       | NBS-TM        | Os07g0599100 |                          | Pentatricopeptide repeat                                                    |
| maker-7-augustus-gene-242.56-mRNA-1 | NA | NA       |               | Os07g0600400 | OsR498G0714706600.01.T03 | Ribosome biogenesis protein WDR12 homolog                                   |
| maker-7-augustus-gene-243.39-mRNA-1 | NA | NA       |               | Os07g0602200 | OsR498G0714712900.01.T04 | Histone deacetylase                                                         |
| maker-7-augustus-gene-243.56-mRNA-1 | NA | NA       |               | 0            | OsR498G0714712200.01.T01 | Putative hydrolase yugF                                                     |
| maker-7-augustus-gene-243.59-mRNA-1 | NA | Japonica |               | Os07g0602600 | OsR498G0714713800.01.T01 | Glycine-rich protein2                                                       |
| maker-7-augustus-gene-244.33-mRNA-1 | NA | Indica   |               | Os07g0602900 | OsR498G0714715000.01.T01 | Ninja-family protein 6                                                      |
| maker-7-augustus-gene-244.35-mRNA-1 | NA | NA       |               | Os07g0603100 | OsR498G0714716800.01.T01 | Ras GTPase-activating protein-binding protein 2                             |
| maker-7-augustus-gene-244.40-mRNA-1 | NA | NA       |               | Os07g0603300 | OsR498G0714717400.01.T02 | Transcription initiation factor IIB                                         |
| maker-7-augustus-gene-245.31-mRNA-1 | NA | Indica   |               | Os07g0603600 | OsR498G0714720100.01.T01 | Methylesterase 11, chloroplastic                                            |
| maker-7-augustus-gene-245.36-mRNA-1 | NA | NA       |               | Os07g0603800 | OsR498G0714721100.01.T03 | Peptide transporter PTR2                                                    |
| maker-7-augustus-gene-245.44-mRNA-1 | NA | NA       |               | 0            | OsR498G0714723300.01.T01 | COBRA-like protein 1                                                        |
| maker-7-augustus-gene-245.53-mRNA-1 | NA | NA       |               |              |                          | COBRA-like protein 5                                                        |
| maker-7-augustus-gene-249.8-mRNA-1  | NA | NA       |               |              |                          | Transposon protein, putative, Mutator sub-class, expressed                  |
| maker-7-augustus-gene-25.26-mRNA-1  | NA | NA       |               | 0            | OsR498G0713539800.01.T01 | Fanconi anemia group D2 protein homolog                                     |
| maker-7-augustus-gene-250.32-mRNA-1 | NA | NA       |               | Os07g0614100 | OsR498G0714748200.01.T02 | Proteasome endopeptidase complex                                            |
| maker-7-augustus-gene-250.8-mRNA-1  | NA | NA       | Kinase-TM     | Os07g0613500 | OsR498G0714745300.01.T02 | Serine/threonine-protein kinase RIPK                                        |
| maker-7-augustus-gene-251.29-mRNA-1 | NA | NA       |               | 0            | OsR498G0714749100.01.T02 | Inter alpha-trypsin inhibitor, heavy chain 4                                |
| maker-7-augustus-gene-251.65-mRNA-1 | NA | NA       |               | Os07g0615800 | OsR498G0714754000.01.T02 | DNA-directed RNA polymerases II, IV and V subunit 9A                        |
| maker-7-augustus-gene-26.0-mRNA-1   | NA | NA       |               | Os07g0155100 | OsR498G0713544300.01.T01 | DAO domain-containing protein (Fragment)                                    |
| maker-7-augustus-gene-26.11-mRNA-1  | NA | NA       |               | Os07g0157000 | OsR498G0713549900.01.T01 | Peroxidase                                                                  |
| maker-7-augustus-gene-26.13-mRNA-1  | NA | NA       |               | 0            | OsR498G0713550300.01.T05 | Deoxyribonuclease tatD                                                      |
| maker-7-augustus-gene-26.20-mRNA-1  | NA | NA       |               | Os07g0158200 | OsR498G0713550700.01.T01 | Deoxyribonuclease tatD                                                      |
| maker-7-augustus-gene-26.24-mRNA-1  | NA | NA       |               |              |                          | DUF4220 domain-containing protein (Fragment)                                |
| maker-7-augustus-gene-26.27-mRNA-1  | NA | NA       |               | 0            | OsR498G0713550200.01.T06 |                                                                             |
| maker-7-augustus-gene-26.3-mRNA-1   | NA | NA       |               | Os07g0155600 | OsR498G0713546500.01.T02 | Ethylene insensitive                                                        |
| maker-7-augustus-gene-26.31-mRNA-1  | NA | NA       |               | Os07g0158300 | OsR498G0713551000.01.T01 | 33 kDa ribonucleoprotein chloroplastic                                      |
| maker-7-augustus-gene-26.9-mRNA-1   | NA | NA       |               | Os07g0156000 | OsR498G0713549700.01.T01 | Peroxidase                                                                  |
| maker-7-augustus-gene-261.15-mRNA-1 | NA | NA       |               | 0            | OsR498G0917123900.01.T01 |                                                                             |
| maker-7-augustus-gene-266.13-mRNA-1 | NA | NA       |               | Os07g0645000 | OsR498G0714852800.01.T01 | Glycoprotein membrane GPI-anchored                                          |
| maker-7-augustus-gene-266.15-mRNA-1 | NA | NA       |               |              |                          | Non-specific serine/threonine protein kinase                                |
| maker-7-augustus-gene-266.8-mRNA-1  | NA | NA       |               | Os07g0645000 | OsR498G0714852800.01.T01 | Glycoprotein membrane GPI-anchored                                          |
| maker-7-augustus-gene-267.44-mRNA-1 | NA | NA       |               | Os07g0645000 | OsR498G0714852800.01.T01 | Glycoprotein membrane GPI-anchored                                          |
| maker-7-augustus-gene-267.46-mRNA-1 | NA | NA       |               |              |                          | Non-specific serine/threonine protein kinase                                |

|                                     |    |          |           |              |                          |                                                                           |
|-------------------------------------|----|----------|-----------|--------------|--------------------------|---------------------------------------------------------------------------|
| maker-7-augustus-gene-268.0-mRNA-1  | NA | NA       |           | Os07g0583500 |                          | rRNA N-glycosidase                                                        |
| maker-7-augustus-gene-268.19-mRNA-1 | NA | NA       |           | Os07g0646600 | OsR498G0714860400.01.T02 |                                                                           |
| maker-7-augustus-gene-268.22-mRNA-1 | NA | NA       |           | Os07g0646600 | OsR498G0714860400.01.T01 | Peptidase A1 domain-containing protein                                    |
| maker-7-augustus-gene-268.23-mRNA-1 | NA | NA       |           | Os07g0646600 | OsR498G0714860400.01.T01 | Golgin subfamily A member 6-like protein 22                               |
| maker-7-augustus-gene-269.36-mRNA-1 | NA | NA       |           | 0            | OsR498G0714865900.01.T05 | Mediator of RNA polymerase II transcription subunit 12                    |
| maker-7-augustus-gene-269.51-mRNA-1 | NA | NA       |           | 0            | OsR498G0408875900.01.T01 | Phosphate synthase-like                                                   |
| maker-7-augustus-gene-27.29-mRNA-1  | NA | NA       |           | 0            | OsR498G0713551400.01.T01 | CCAAT-binding transcription factor B                                      |
| maker-7-augustus-gene-270.6-mRNA-1  | NA | Japonica |           | Os07g0650600 | OsR498G0714876300.01.T02 |                                                                           |
| maker-7-augustus-gene-271.35-mRNA-1 | NA | NA       |           | Os07g0651600 |                          | Retrovirus-related Pol polyprotein from transposon TNT 1-94               |
| maker-7-augustus-gene-273.22-mRNA-1 | NA | Indica   |           | Os07g0543500 | OsR498G0714874300.01.T01 |                                                                           |
| maker-7-augustus-gene-273.24-mRNA-1 | NA | Indica   |           | Os07g0543500 | OsR498G0714874500.01.T01 | Saposin B-type domain-containing protein                                  |
| maker-7-augustus-gene-273.25-mRNA-1 | NA | Japonica |           | Os07g0654450 | OsR498G0714876300.01.T02 |                                                                           |
| maker-7-augustus-gene-276.3-mRNA-1  | NA | NA       |           | Os07g0659800 | OsR498G0714892700.01.T02 | RING-type E3 ubiquitin transferase                                        |
| maker-7-augustus-gene-276.36-mRNA-1 | NA | NA       |           | 0            | OsR498G0714894200.01.T02 | RNA pseudourine synthase 6, chloroplastic                                 |
| maker-7-augustus-gene-276.5-mRNA-1  | NA | Indica   |           | Os03g0669000 | OsR498G0714893500.01.T02 | DEAD-box ATP-dependent RNA helicase 10                                    |
| maker-7-augustus-gene-277.45-mRNA-1 | NA | Japonica |           | Os07g0661800 | OsR498G0305954400.01.T03 | Nop domain-containing protein                                             |
| maker-7-augustus-gene-277.47-mRNA-1 | NA | NA       |           | Os07g0662500 | OsR498G0714900500.01.T01 | Eukaryotic translation elongation factor 1B alpha-subunit                 |
| maker-7-augustus-gene-277.51-mRNA-1 | NA | NA       |           | Os07g0662600 | OsR498G0714900900.01.T01 | RRM domain-containing protein (Fragment)                                  |
| maker-7-augustus-gene-277.59-mRNA-1 | NA | NA       |           | Os07g0661500 | OsR498G0714898800.01.T02 | DNA binding                                                               |
| maker-7-augustus-gene-277.64-mRNA-1 | NA | NA       |           | Os07g0661600 | OsR498G0714899400.01.T04 | ABA insensitive ring protein                                              |
| maker-7-augustus-gene-277.68-mRNA-1 | NA | NA       |           | Os07g0661700 | OsR498G0714899600.01.T03 | Serine/threonine-protein kinase TAO1-A                                    |
| maker-7-augustus-gene-277.70-mRNA-1 | NA | NA       |           | Os07g0661900 | OsR498G0714900000.01.T02 | Pentatricopeptide repeat-containing protein isoform A                     |
| maker-7-augustus-gene-277.72-mRNA-1 | NA | NA       |           |              |                          | Tyrosine-specific transport protein-like isoform X1                       |
| maker-7-augustus-gene-278.0-mRNA-1  | NA | NA       |           | Os07g0662900 | OsR498G0714902300.01.T05 | Amylomaltase                                                              |
| maker-7-augustus-gene-278.10-mRNA-1 | NA | NA       |           | Os07g0664000 | OsR498G0714906900.01.T01 | Putative sex determination protein tasselseed 2                           |
| maker-7-augustus-gene-278.12-mRNA-1 | NA | NA       |           | Os07g0664300 | OsR498G0714909500.01.T01 | Putative sex determination protein tasselseed 2                           |
| maker-7-augustus-gene-278.13-mRNA-1 | NA | NA       |           | Os07g0664400 | OsR498G0714909700.01.T01 | Putative sex determination protein tasselseed 2                           |
| maker-7-augustus-gene-278.7-mRNA-1  | NA | NA       |           | Os07g0663500 | OsR498G0714904500.01.T03 | Putative sex determination protein tasselseed 2                           |
| maker-7-augustus-gene-278.8-mRNA-1  | NA | NA       |           | Os07g0663600 | OsR498G0714905300.01.T01 | Putative sex determination protein tasselseed 2                           |
| maker-7-augustus-gene-278.9-mRNA-1  | NA | NA       |           | Os07g0663700 | OsR498G0714905900.01.T01 | Putative sex determination protein tasselseed 2                           |
| maker-7-augustus-gene-278.92-mRNA-1 | NA | Indica   |           | Os07g0664500 | OsR498G0714910700.01.T02 | Putative sex determination protein tasselseed 2                           |
| maker-7-augustus-gene-278.95-mRNA-1 | NA | NA       |           | Os07g0663300 | OsR498G0714904000.01.T01 | RNA-binding protein BRN1                                                  |
| maker-7-augustus-gene-279.31-mRNA-1 | NA | Indica   |           | Os07g0665000 | OsR498G0714911100.01.T01 | Putative sex determination protein tasselseed 2                           |
| maker-7-augustus-gene-279.33-mRNA-1 | NA | NA       |           | Os07g0665000 | OsR498G0714911700.01.T01 | Putative sex determination protein tasselseed 2                           |
| maker-7-augustus-gene-279.35-mRNA-1 | NA | NA       |           | Os07g0665900 | OsR498G0714913300.01.T03 |                                                                           |
| maker-7-augustus-gene-279.40-mRNA-1 | NA | NA       |           | Os07g0665200 | OsR498G0714912000.01.T02 | Superoxide dismutase                                                      |
| maker-7-augustus-gene-279.44-mRNA-1 | NA | Japonica |           | Os07g0665300 | OsR498G0714913000.01.T04 | Superoxide dismutase                                                      |
| maker-7-augustus-gene-279.50-mRNA-1 | NA | Indica   |           | Os07g0665700 | OsR498G0714913000.01.T03 | Superoxide dismutase                                                      |
| maker-7-augustus-gene-279.55-mRNA-1 | NA | NA       |           | 0            | OsR498G0714913200.01.T01 | Chlorophyllase                                                            |
| maker-7-augustus-gene-28.29-mRNA-1  | NA | NA       |           | Os07g0159800 | OsR498G0713560100.01.T01 | MD-2-related lipid recognition domain-containing protein / ML domain-cont |
| maker-7-augustus-gene-28.33-mRNA-1  | NA | NA       |           | Os07g0160000 | OsR498G0713560700.01.T01 | Ubiquitin carboxyl-terminal hydrolase                                     |
| maker-7-augustus-gene-28.49-mRNA-1  | NA | NA       |           | Os07g0160400 | OsR498G0713563400.01.T01 | VOC domain-containing protein (Fragment)                                  |
| maker-7-augustus-gene-280.12-mRNA-1 | NA | Indica   | Kinase-TM | Os03g0349200 | OsR498G0714922100.01.T01 | probable serine/threonine-protein kinase At1g54610                        |
| maker-7-augustus-gene-280.16-mRNA-1 | NA | NA       | Kinase-TM | 0            | OsR498G0714923700.01.T02 | Receptor-like serine/threonine-protein kinase                             |
| maker-7-augustus-gene-280.19-mRNA-1 | NA | NA       |           | Os07g0668700 | OsR498G0714924700.01.T02 | Alpha/beta-Hydrolases superfamily protein                                 |
| maker-7-augustus-gene-280.30-mRNA-1 | NA | Indica   |           | Os09g0442400 | OsR498G0714922400.01.T02 | Protein GAMETE EXPRESSED 1                                                |
| maker-7-augustus-gene-280.35-mRNA-1 | NA | NA       |           | Os07g0668200 | OsR498G0714922800.01.T02 | RING finger and CHY zinc finger domain-containing protein 1 isoform 1     |
| maker-7-augustus-gene-280.39-mRNA-1 | NA | Indica   |           | Os07g0668300 | OsR498G0714923000.01.T01 | Gdsl esterasellipase                                                      |
| maker-7-augustus-gene-280.42-mRNA-1 | NA | NA       | Kinase-TM | Os07g0668900 | OsR498G0714925200.01.T01 | Serine/threonine-protein kinase PBL27                                     |
| maker-7-augustus-gene-281.0-mRNA-1  | NA | NA       |           | Os07g0669000 | OsR498G0714925300.01.T02 | DNA polymerase zeta catalytic subunit                                     |
| maker-7-augustus-gene-281.10-mRNA-1 | NA | NA       |           | Os07g0669200 | OsR498G0714925900.01.T01 | GTP-binding protein OBG, chloroplastic                                    |
| maker-7-augustus-gene-281.13-mRNA-1 | NA | NA       |           |              |                          |                                                                           |
| maker-7-augustus-gene-281.15-mRNA-1 | NA | NA       |           |              |                          |                                                                           |
| maker-7-augustus-gene-281.27-mRNA-1 | NA | NA       |           | Os07g0669100 | OsR498G0714925800.01.T02 | Xylose isomerase                                                          |
| maker-7-augustus-gene-281.34-mRNA-1 | NA | NA       |           | Os07g0669600 | OsR498G0714928400.01.T02 | Potassium transporter 7 (Fragment)                                        |
| maker-7-augustus-gene-281.37-mRNA-1 | NA | NA       |           | Os07g0669700 | OsR498G0714928600.01.T03 | Potassium transporter                                                     |
| maker-7-augustus-gene-281.7-mRNA-1  | NA | NA       |           | 0            | OsR498G0714925500.01.T01 | DNA polymerase zeta catalytic subunit                                     |
| maker-7-augustus-gene-282.15-mRNA-1 | NA | Japonica |           | Os07g0671800 | OsR498G0714935100.01.T01 | Stress-related protein (Fragment)                                         |
| maker-7-augustus-gene-282.4-mRNA-1  | NA | Indica   |           | Os07g0671400 | OsR498G0714933500.01.T04 | HMA domain-containing protein                                             |
| maker-7-augustus-gene-282.7-mRNA-1  | NA | NA       |           | Os07g0671700 | OsR498G0714934900.01.T01 | Histone-arginine methyltransferase CARM1                                  |
| maker-7-augustus-gene-285.9-mRNA-1  | NA | NA       |           | Os07g0679000 | OsR498G0714957000.01.T03 | Potassium transporter                                                     |



|                                     |    |          |           |              |                          |                                                            |
|-------------------------------------|----|----------|-----------|--------------|--------------------------|------------------------------------------------------------|
| maker-7-augustus-gene-287.53-mRNA-1 | NA | NA       |           | Os07g0682400 | OsR498G0714968400.01.T01 | Zinc finger CCH domain-containing protein 53               |
| maker-7-augustus-gene-3.50-mRNA-1   | NA | NA       |           | Os07g0111600 | OsR498G0713391900.01.T01 | Purple acid phosphatase                                    |
| maker-7-augustus-gene-3.52-mRNA-1   | NA | NA       |           | Os07g0112100 | OsR498G0713394500.01.T04 | Flavin-containing monooxygenase                            |
| maker-7-augustus-gene-3.54-mRNA-1   | NA | NA       |           | Os07g0112800 | OsR498G0713396500.01.T06 | Eukaryotic translation initiation factor 5A                |
| maker-7-augustus-gene-3.60-mRNA-1   | NA | NA       |           | 0            | OsR498G0713397700.01.T01 |                                                            |
| maker-7-augustus-gene-3.63-mRNA-1   | NA | Indica   |           | Os07g0111001 | OsR498G0713398300.01.T01 |                                                            |
| maker-7-augustus-gene-3.66-mRNA-1   | NA | NA       |           | Os07g0112400 |                          | 3'-5' exonuclease domain-containing protein                |
| maker-7-augustus-gene-3.67-mRNA-1   | NA | Indica   |           | Os07g0112700 | OsR498G0713396200.01.T02 | Phytoecyanin domain-containing protein (Fragment)          |
| maker-7-augustus-gene-3.69-mRNA-1   | NA | NA       |           | Os07g0113200 | OsR498G0713397600.01.T02 |                                                            |
| maker-7-augustus-gene-32.48-mRNA-1  | NA | NA       |           | Os07g0167700 |                          |                                                            |
| maker-7-augustus-gene-32.50-mRNA-1  | NA | Japonica |           | Os07g0168600 | OsR498G0713590100.01.T01 | Glucan endo-1,3-beta-D-glucosidase                         |
| maker-7-augustus-gene-32.62-mRNA-1  | NA | NA       |           | Os07g0168000 | OsR498G0713588000.01.T03 | Polynucleotide phosphorylase 1                             |
| maker-7-augustus-gene-33.50-mRNA-1  | NA | NA       |           | Os07g0169600 | OsR498G0713593500.01.T03 | 2'-deoxymugineic-acid 2'-dioxxygenase                      |
| maker-7-augustus-gene-33.54-mRNA-1  | NA | NA       |           | Os07g0169700 | OsR498G0713593700.01.T01 | Gibberellin 20 oxidase                                     |
| maker-7-augustus-gene-33.56-mRNA-1  | NA | NA       |           | Os07g0170200 | OsR498G0713596500.01.T01 | HNHc domain-containing protein (Fragment)                  |
| maker-7-augustus-gene-33.60-mRNA-1  | NA | NA       |           | 0            | OsR498G0713598700.01.T02 | F-box domain                                               |
| maker-7-augustus-gene-33.63-mRNA-1  | NA | NA       |           | Os07g0170900 | OsR498G0713599300.01.T02 |                                                            |
| maker-7-augustus-gene-33.66-mRNA-1  | NA | Indica   |           | Os07g0171100 | OsR498G0713599500.01.T01 | Putative tyrosine phosphatase (Fragment)                   |
| maker-7-augustus-gene-33.70-mRNA-1  | NA | NA       |           | Os07g0171300 | OsR498G0713600100.01.T02 | Casein kinase                                              |
| maker-7-augustus-gene-33.76-mRNA-1  | NA | NA       |           |              |                          | 2-oxoisovalerate dehydrogenase subunit beta                |
| maker-7-augustus-gene-33.82-mRNA-1  | NA | NA       |           | Os07g0170300 | OsR498G0713596800.01.T02 | YTH domain-containing family protein 2                     |
| maker-7-augustus-gene-33.86-mRNA-1  | NA | Indica   |           | Os07g0171200 | OsR498G0713599800.01.T01 | ADP-glucose phosphorylase                                  |
| maker-7-augustus-gene-34.42-mRNA-1  | NA | NA       |           | 0            | OsR498G0713600500.01.T01 |                                                            |
| maker-7-augustus-gene-34.44-mRNA-1  | NA | NA       |           | 0            | OsR498G0713601100.01.T01 |                                                            |
| maker-7-augustus-gene-34.46-mRNA-1  | NA | NA       |           | 0            | OsR498G0713601900.01.T03 | DNA-binding protein RHL1-like isoform X3                   |
| maker-7-augustus-gene-35.51-mRNA-1  | NA | NA       |           | Os07g0175600 | OsR498G0713610900.01.T01 | non-specific lipid-transfer protein-like protein At2g13820 |
| maker-7-augustus-gene-35.63-mRNA-1  | NA | NA       |           | Os07g0175900 | OsR498G0713613000.01.T03 | Type IV inositol polyphosphate 5-phosphatase 7             |
| maker-7-augustus-gene-36.35-mRNA-1  | NA | NA       | Kinase-TM | Os07g0176600 | OsR498G0713618700.01.T01 | Serine/threonine-protein kinase Nek2                       |
| maker-7-augustus-gene-36.40-mRNA-1  | NA | NA       |           |              |                          | MMS19 nucleotide excision repair protein                   |
| maker-7-augustus-gene-36.46-mRNA-1  | NA | NA       |           | Os07g0177000 |                          | DUF295 domain-containing protein (Fragment)                |
| maker-7-augustus-gene-36.47-mRNA-1  | NA | Indica   |           | Os07g0177000 | OsR498G0713621000.01.T02 | DUF295 domain-containing protein                           |
| maker-7-augustus-gene-36.52-mRNA-1  | NA | NA       |           | Os07g0177200 | OsR498G0713621400.01.T01 | Transmembrane BAX inhibitor motif-containing protein 4     |
| maker-7-augustus-gene-36.54-mRNA-1  | NA | NA       |           | Os07g0177300 | OsR498G0713621600.01.T01 | Transmembrane BAX inhibitor motif-containing protein 4     |
| maker-7-augustus-gene-38.10-mRNA-1  | NA | Indica   |           | Os07g0181000 | OsR498G0713631900.01.T01 | Pyruvate kinase isozyme A, chloroplastic                   |
| maker-7-augustus-gene-38.13-mRNA-1  | NA | Japonica |           | Os07g0181100 | OsR498G0510043600.01.T01 | S-type anion channel SLAH3                                 |
| maker-7-augustus-gene-38.8-mRNA-1   | NA | NA       |           | Os07g0180900 | OsR498G0713631700.01.T01 | Ribosomal protein L4/L1 family                             |
| maker-7-augustus-gene-39.0-mRNA-1   | NA | Indica   |           | Os03g0797600 | OsR498G0713634900.01.T03 | Transcription factor UNE12                                 |
| maker-7-augustus-gene-4.0-mRNA-1    | NA | NA       |           | 0            | OsR498G0713398500.01.T01 |                                                            |
| maker-7-augustus-gene-4.18-mRNA-1   | NA | NA       |           | Os07g0114000 | OsR498G0713401800.01.T01 | Protein-serine/threonine phosphatase                       |
| maker-7-augustus-gene-4.2-mRNA-1    | NA | NA       |           | Os07g0114300 | OsR498G0713402900.01.T03 | C2 domain-containing protein                               |
| maker-7-augustus-gene-4.20-mRNA-1   | NA | NA       | Kinase-TM | Os07g0114400 | OsR498G0713403200.01.T01 | CK2 protein kinase alpha 4                                 |
| maker-7-augustus-gene-4.25-mRNA-1   | NA | NA       |           | 0            | OsR498G0713405400.01.T01 |                                                            |
| maker-7-augustus-gene-4.27-mRNA-1   | NA | NA       |           | Os07g0115200 | OsR498G0713405600.01.T01 |                                                            |
| maker-7-augustus-gene-4.5-mRNA-1    | NA | NA       |           | Os07g0114500 | OsR498G0713403700.01.T01 |                                                            |
| maker-7-augustus-gene-4.8-mRNA-1    | NA | NA       |           |              |                          | F-box domain-containing protein (Fragment)                 |
| maker-7-augustus-gene-40.55-mRNA-1  | NA | NA       |           | 0            | OsR498G0713640100.01.T01 | Auxin response factor                                      |
| maker-7-augustus-gene-40.75-mRNA-1  | NA | NA       |           | 0            | OsR498G0713638000.01.T01 | Auxin response factor                                      |
| maker-7-augustus-gene-40.77-mRNA-1  | NA | Indica   |           | Os03g0798600 | OsR498G0713641800.01.T01 | Ribosomal protein S19/S15                                  |
| maker-7-augustus-gene-41.0-mRNA-1   | NA | NA       |           | 0            | OsR498G0713647100.01.T03 | TPX2 domain-containing protein                             |
| maker-7-augustus-gene-42.29-mRNA-1  | NA | NA       |           | 0            | OsR498G0713653700.01.T01 | D-2-hydroxyglutarate dehydrogenase mitochondrial           |
| maker-7-augustus-gene-44.33-mRNA-1  | NA | NA       |           | Os07g0190600 |                          | ATP-dependent DNA helicase                                 |
| maker-7-augustus-gene-44.36-mRNA-1  | NA | Indica   |           | Os03g0687000 | OsR498G0713666000.01.T03 | Putative peptide/nitrate transporter                       |
| maker-7-augustus-gene-44.38-mRNA-1  | NA | NA       |           | Os07g0190800 | OsR498G0713666200.01.T01 | Thioredoxin h                                              |
| maker-7-augustus-gene-44.40-mRNA-1  | NA | NA       |           | Os07g0190900 | OsR498G0713666400.01.T01 | Forkhead-associated FHA domain-containing protein          |
| maker-7-augustus-gene-45.35-mRNA-1  | NA | NA       |           | Os07g0191000 | OsR498G0713666500.01.T02 | Histidinol-phosphatase                                     |
| maker-7-augustus-gene-45.43-mRNA-1  | NA | NA       |           | 0            | OsR498G0713671700.01.T01 | Half-size ABCG transporter                                 |
| maker-7-augustus-gene-45.45-mRNA-1  | NA | NA       |           |              |                          | CYSTM domain-containing protein                            |
| maker-7-augustus-gene-45.47-mRNA-1  | NA | NA       |           | Os07g0191700 | OsR498G0713672300.01.T01 | Putative 2',3'-cyclic-nucleotide 3'-phosphodiesterase      |
| maker-7-augustus-gene-46.0-mRNA-1   | NA | NA       |           | Os07g0192900 | OsR498G0713676500.01.T01 | Early flower 5                                             |
| maker-7-augustus-gene-46.10-mRNA-1  | NA | NA       |           | Os07g0193600 | OsR498G0713679800.01.T01 | DDT domain-containing protein DDR4                         |
| maker-7-augustus-gene-46.15-mRNA-1  | NA | NA       |           |              |                          | Transcription factor BHLH089                               |

|                                    |    |          |               |              |                          |                                                                            |
|------------------------------------|----|----------|---------------|--------------|--------------------------|----------------------------------------------------------------------------|
| maker-7-augustus-gene-46.4-mRNA-1  | NA | NA       |               | 0            | OsR498G0713677100.01.T01 | GSDH domain-containing protein (Fragment)                                  |
| maker-7-augustus-gene-46.7-mRNA-1  | NA | NA       |               | Os07g0193200 |                          | protein ACCELERATED CELL DEATH 6-like                                      |
| maker-7-augustus-gene-47.29-mRNA-1 | NA | NA       |               | Os07g0194000 | OsR498G0713681100.01.T01 | Vesicle-associated membrane protein 721                                    |
| maker-7-augustus-gene-47.32-mRNA-1 | NA | NA       | Kinase-TM     | Os07g0194100 | OsR498G0713681500.01.T01 | Non-specific serine/threonine protein kinase                               |
| maker-7-augustus-gene-47.34-mRNA-1 | NA | Indica   |               | Os07g0194350 | OsR498G0713682400.01.T01 | CLAVATA3/ESR (CLE)-related protein 25                                      |
| maker-7-augustus-gene-47.36-mRNA-1 | NA | NA       |               | Os07g0194500 | OsR498G0713682800.01.T01 | Procollagen-proline 4-dioxygenase                                          |
| maker-7-augustus-gene-47.38-mRNA-1 | NA | Indica   |               | Os03g0803900 | OsR498G0713684800.01.T01 | Galectin domain-containing protein (Fragment)                              |
| maker-7-augustus-gene-47.40-mRNA-1 | NA | NA       |               | Os07g0195100 | OsR498G0713686000.01.T01 | Ras-related protein ARA-3                                                  |
| maker-7-augustus-gene-47.42-mRNA-1 | NA | NA       |               | Os07g0195200 | OsR498G0713686200.01.T01 | Galectin domain-containing protein (Fragment)                              |
| maker-7-augustus-gene-49.2-mRNA-1  | NA | NA       |               | 0            | OsR498G0713699200.01.T05 |                                                                            |
| maker-7-augustus-gene-5.37-mRNA-1  | NA | NA       |               | Os07g0115300 | OsR498G0713405700.01.T01 | Peroxidase                                                                 |
| maker-7-augustus-gene-5.39-mRNA-1  | NA | NA       | LRR-TM        | Os07g0115400 |                          | LRR receptor-like serine/threonine-protein kinase FLS2                     |
| maker-7-augustus-gene-5.41-mRNA-1  | NA | Indica   |               | Os03g0762900 | OsR498G0713407100.01.T01 | Protein SNOWY COTYLEDON 3                                                  |
| maker-7-augustus-gene-5.44-mRNA-1  | NA | NA       |               | Os03g0643100 | OsR498G0713408500.01.T01 | WAC domain-containing protein                                              |
| maker-7-augustus-gene-53.25-mRNA-1 | NA | Indica   |               | Os03g0807700 | OsR498G0713723100.01.T01 | Putative Galactose-binding domain-containing protein                       |
| maker-7-augustus-gene-53.38-mRNA-1 | NA | Indica   |               | Os07g0206700 | OsR498G0713721600.01.T03 | Methyltransferase                                                          |
| maker-7-augustus-gene-54.0-mRNA-1  | NA | Indica   |               | Os03g0807800 | OsR498G0713724300.01.T01 | Ribosomal protein S5                                                       |
| maker-7-augustus-gene-54.13-mRNA-1 | NA | NA       |               | Os07g0208600 | OsR498G0713732500.01.T02 | Remorin                                                                    |
| maker-7-augustus-gene-54.15-mRNA-1 | NA | NA       | Kinase-LRR-TM | Os07g0207100 | OsR498G0713723400.01.T01 | Leucine-rich repeat receptor-like tyrosine-protein kinase PXC3             |
| maker-7-augustus-gene-54.17-mRNA-1 | NA | NA       |               | 0            | OsR498G0713726400.01.T02 | Polygalacturonase                                                          |
| maker-7-augustus-gene-54.2-mRNA-1  | NA | NA       |               | Os07g0207700 | OsR498G0713726900.01.T04 | Putative small phosphatase-like protein 2-B                                |
| maker-7-augustus-gene-54.20-mRNA-1 | NA | Indica   |               | Os07g0208100 | OsR498G0713727200.01.T01 | Polygalacturonase                                                          |
| maker-7-augustus-gene-54.22-mRNA-1 | NA | NA       |               | Os07g0208000 | OsR498G0713727400.01.T02 | 30S ribosomal protein S8, chloroplastic                                    |
| maker-7-augustus-gene-54.24-mRNA-1 | NA | NA       |               | Os05g0394100 | OsR498G0713729200.01.T01 | NAM-associated domain-containing protein                                   |
| maker-7-augustus-gene-54.26-mRNA-1 | NA | NA       |               | Os07g0208500 | OsR498G0713731400.01.T02 | Cellulose synthase                                                         |
| maker-7-augustus-gene-54.8-mRNA-1  | NA | NA       |               | Os07g0208100 | OsR498G0713727500.01.T02 | Polygalacturonase                                                          |
| maker-7-augustus-gene-55.27-mRNA-1 | NA | Indica   |               | Os07g0208900 | OsR498G0713733900.01.T01 | MFS domain-containing protein (Fragment)                                   |
| maker-7-augustus-gene-55.31-mRNA-1 | NA | NA       |               | Os07g0209000 | OsR498G0713734100.01.T01 | Dolichyl-diphosphooligosaccharide--protein glycosyltransferase 48 kDa subu |
| maker-7-augustus-gene-55.36-mRNA-1 | NA | NA       |               | 0            | OsR498G0713736900.01.T09 | DNA polymerase zeta catalytic subunit                                      |
| maker-7-augustus-gene-55.38-mRNA-1 | NA | Indica   |               | Os07g0209500 | OsR498G0713736900.01.T10 | DNA polymerase zeta catalytic subunit                                      |
| maker-7-augustus-gene-55.40-mRNA-1 | NA | NA       |               | 0            | OsR498G0713738100.01.T03 |                                                                            |
| maker-7-augustus-gene-55.41-mRNA-1 | NA | Indica   |               | Os07g0209800 | OsR498G0713738700.01.T01 | DNA-binding protein EMBP-1                                                 |
| maker-7-augustus-gene-55.47-mRNA-1 | NA | Indica   |               | Os07g0210000 | OsR498G0713740300.01.T01 | Exocyst subunit Exo70 family protein (Fragment)                            |
| maker-7-augustus-gene-55.50-mRNA-1 | NA | NA       |               | Os07g0209100 | OsR498G0713734600.01.T01 | Galactinol-raffinose galactosyltransferase                                 |
| maker-7-augustus-gene-55.56-mRNA-1 | NA | NA       |               | 0            | OsR498G0713736200.01.T01 |                                                                            |
| maker-7-augustus-gene-56.33-mRNA-1 | NA | NA       |               | 0            | OsR498G0713741700.01.T01 |                                                                            |
| maker-7-augustus-gene-56.35-mRNA-1 | NA | NA       |               | 0            | OsR498G0713745500.01.T02 | Mediator of RNA polymerase II transcription subunit 33A like               |
| maker-7-augustus-gene-56.41-mRNA-1 | NA | NA       |               | Os07g0211400 | OsR498G0713747300.01.T01 | Protein-serine/threonine phosphatase                                       |
| maker-7-augustus-gene-56.45-mRNA-1 | NA | NA       |               | 0            | OsR498G0713747700.01.T01 | BHLH domain-containing protein                                             |
| maker-7-augustus-gene-56.50-mRNA-1 | NA | NA       |               | Os07g0211000 | OsR498G0713744000.01.T05 | Exocyst subunit Exo70 family protein (Fragment)                            |
| maker-7-augustus-gene-57.28-mRNA-1 | NA | NA       |               | Os07g0212200 | OsR498G0713751900.01.T03 | Chloroplast stem-loop binding protein a, chloroplastic                     |
| maker-7-augustus-gene-57.29-mRNA-1 | NA | NA       |               | Os07g0212200 | OsR498G0713751900.01.T04 | Chloroplast stem-loop binding protein a, chloroplastic                     |
| maker-7-augustus-gene-57.38-mRNA-1 | NA | NA       |               | Os07g0211800 | OsR498G0713750000.01.T02 | Alpha/beta-Hydrolases superfamily protein                                  |
| maker-7-augustus-gene-57.44-mRNA-1 | NA | NA       |               | 0            | OsR498G0713750800.01.T01 | nitrate regulatory gene2 protein isoform X1                                |
| maker-7-augustus-gene-57.46-mRNA-1 | NA | NA       |               | Os07g0212300 | OsR498G0713752200.01.T01 | NUDIX hydrolase domain                                                     |
| maker-7-augustus-gene-57.49-mRNA-1 | NA | NA       |               | Os07g0212400 |                          | HGWP repeat containing protein-like                                        |
| maker-7-augustus-gene-58.30-mRNA-1 | NA | NA       |               | Os07g0213400 | OsR498G0713759900.01.T01 | Phytochrome interacting factor 3-like 2                                    |
| maker-7-augustus-gene-58.32-mRNA-1 | NA | NA       |               | 0            | OsR498G0713763500.01.T01 |                                                                            |
| maker-7-augustus-gene-58.36-mRNA-1 | NA | Indica   |               | Os07g0213300 | OsR498G0713759600.01.T07 | Pentatricopeptide repeat                                                   |
| maker-7-augustus-gene-58.38-mRNA-1 | NA | NA       |               | 0            | OsR498G0815909000.01.T01 | Transposon protein, putative, CACTA, En/Spm sub-class                      |
| maker-7-augustus-gene-59.32-mRNA-1 | NA | NA       |               | Os07g0214900 | OsR498G0713765800.01.T01 | Chalcone synthase                                                          |
| maker-7-augustus-gene-59.34-mRNA-1 | NA | Indica   |               | Os07g0215200 | OsR498G0713768000.01.T06 |                                                                            |
| maker-7-augustus-gene-61.30-mRNA-1 | NA | NA       |               |              |                          | Tau-cadinol synthase                                                       |
| maker-7-augustus-gene-62.26-mRNA-1 | NA | Japonica |               | Os07g0218700 | OsR498G0408175300.01.T01 | 5-epiaristolochene 1,3-dihydroxylase                                       |
| maker-7-augustus-gene-62.28-mRNA-1 | NA | Japonica |               | Os07g0218700 | OsR498G0408175300.01.T01 | 5-epiaristolochene 1,3-dihydroxylase                                       |
| maker-7-augustus-gene-89.0-mRNA-1  | NA | NA       |               | Os07g0264100 | OsR498G0713942700.01.T04 | Erythronate-4-phosphate+dehydrogenase+domain+containing+protein            |
| maker-7-augustus-gene-9.3-mRNA-1   | NA | NA       |               | Os07g0124600 | OsR498G0713438100.01.T02 | Growth-regulating factor 1                                                 |
| maker-7-augustus-gene-9.5-mRNA-1   | NA | Indica   |               | Os07g0124700 | OsR498G0713440300.01.T02 | AP2/ERF domain-containing transcription factor                             |
| maker-7-augustus-gene-92.0-mRNA-1  | NA | NA       |               | Os07g0269800 |                          | F-box domain-containing protein (Fragment)                                 |
| maker-7-augustus-gene-97.4-mRNA-1  | NA | Indica   |               | Os03g0843300 | OsR498G0713971400.01.T01 | Salt tolerance protein II                                                  |
| maker-7-augustus-gene-98.10-mRNA-1 | NA | NA       |               | Os07g0274100 | OsR498G0713985100.01.T04 | Metallophos domain-containing protein (Fragment)                           |

|                                     |    |          |               |              |                          |                                                                            |
|-------------------------------------|----|----------|---------------|--------------|--------------------------|----------------------------------------------------------------------------|
| maker-8-augustus-gene-0.20-mRNA-1   | NA | NA       |               | Os01g0276800 | OsR498G0100656000.01.T01 | Glucosidase 2 subunit beta                                                 |
| maker-8-augustus-gene-0.26-mRNA-1   | NA | NA       |               | Os08g0105000 | OsR498G0815037800.01.T01 | PHD finger protein EHD3                                                    |
| maker-8-augustus-gene-0.29-mRNA-1   | NA | NA       |               | Os08g0105100 | OsR498G0815038000.01.T02 | F-box protein isoform B                                                    |
| maker-8-augustus-gene-0.31-mRNA-1   | NA | Japonica | Kinase-TM     | Os08g0124900 | OsR498G0815100800.01.T01 | Putative receptor-type protein kinase LRK1                                 |
| maker-8-augustus-gene-10.30-mRNA-1  | NA | Indica   |               | Os08g0117000 | OsR498G0815078900.01.T01 | Kinesin-like protein KIN-1                                                 |
| maker-8-augustus-gene-10.38-mRNA-1  | NA | NA       |               | Os08g0117100 | OsR498G0815079100.01.T01 | Ribonucleoprotein, chloroplastic                                           |
| maker-8-augustus-gene-10.40-mRNA-1  | NA | NA       | Kinase-LRR-TM | Os08g0117700 | OsR498G0815080100.01.T01 | Somatic embryogenesis receptor kinase 5-like                               |
| maker-8-augustus-gene-10.42-mRNA-1  | NA | NA       |               | Os08g0117800 | OsR498G0815080500.01.T01 | Cation/H(+) antiporter                                                     |
| maker-8-augustus-gene-10.44-mRNA-1  | NA | NA       |               |              |                          | Pleckstrin homology (PH) domain-containing protein                         |
| maker-8-augustus-gene-10.49-mRNA-1  | NA | NA       |               | Os08g0116700 |                          | VP513 domain-containing protein                                            |
| maker-8-augustus-gene-10.53-mRNA-1  | NA | NA       |               | Os08g0116800 | OsR498G0815078400.01.T01 | Putative polyribonucleotide nucleotidyltransferase, PNPase/RNase PH domain |
| maker-8-augustus-gene-10.57-mRNA-1  | NA | NA       |               | Os08g0116900 | OsR498G0815078600.01.T01 | Hexosyltransferase                                                         |
| maker-8-augustus-gene-10.63-mRNA-1  | NA | NA       |               | Os08g0117200 | OsR498G0815079400.01.T01 | Cytoplasmatic ribosomal protein S13                                        |
| maker-8-augustus-gene-10.65-mRNA-1  | NA | NA       |               | Os08g0117300 | OsR498G0815079600.01.T01 | Cytoplasmatic ribosomal protein S13                                        |
| maker-8-augustus-gene-10.69-mRNA-1  | NA | NA       |               | Os08g0117900 | OsR498G0815080800.01.T02 | Myeloid leukemia factor                                                    |
| maker-8-augustus-gene-100.32-mRNA-1 | NA | NA       |               | Os08g0260600 | OsR498G0815571400.01.T01 | Tetraspanin-8                                                              |
| maker-8-augustus-gene-101.27-mRNA-1 | NA | NA       |               | Os08g0261100 | OsR498G0815573000.01.T01 | Fiber protein Fb34                                                         |
| maker-8-augustus-gene-102.39-mRNA-1 | NA | NA       |               | Os08g0263600 |                          |                                                                            |
| maker-8-augustus-gene-103.0-mRNA-1  | NA | NA       |               | 0            | OsR498G0815582300.01.T01 | Lactation elevated protein 1                                               |
| maker-8-augustus-gene-103.12-mRNA-1 | NA | NA       |               | Os08g0266600 | OsR498G0815585300.01.T04 | WD-40 repeat protein family                                                |
| maker-8-augustus-gene-103.14-mRNA-1 | NA | NA       |               | Os08g0266700 | OsR498G0815585700.01.T01 | Sister chromatid cohesion 1 protein 3                                      |
| maker-8-augustus-gene-103.6-mRNA-1  | NA | Japonica |               | Os08g0266300 | OsR498G0815584300.01.T02 | SGNH hydrolase-type esterase superfamily protein                           |
| maker-8-augustus-gene-104.0-mRNA-1  | NA | NA       |               |              |                          | F-box domain-containing protein                                            |
| maker-8-augustus-gene-104.10-mRNA-1 | NA | NA       |               | Os08g0267800 | OsR498G0815589400.01.T01 | F-box domain-containing protein                                            |
| maker-8-augustus-gene-104.2-mRNA-1  | NA | NA       |               | 0            | OsR498G0815591300.01.T02 | DNA-directed RNA polymerase III subunit RPC5                               |
| maker-8-augustus-gene-105.31-mRNA-1 | NA | NA       |               | Os08g0269500 | OsR498G0815593200.01.T01 |                                                                            |
| maker-8-augustus-gene-105.33-mRNA-1 | NA | Indica   |               | Os08g0269600 | OsR498G0815593400.01.T01 |                                                                            |
| maker-8-augustus-gene-105.37-mRNA-1 | NA | Indica   |               | Os08g0269800 | OsR498G0815593800.01.T02 | F-box protein SKIP1                                                        |
| maker-8-augustus-gene-106.29-mRNA-1 | NA | NA       |               | Os08g0270800 | OsR498G0815597900.01.T03 |                                                                            |
| maker-8-augustus-gene-106.35-mRNA-1 | NA | NA       |               | Os08g0271600 |                          |                                                                            |
| maker-8-augustus-gene-107.37-mRNA-1 | NA | Japonica |               | Os08g0272200 | OsR498G0815603900.01.T01 | Pentatricopeptide repeat-containing protein mitochondrial                  |
| maker-8-augustus-gene-107.41-mRNA-1 | NA | NA       |               | Os08g0272000 | OsR498G0815603000.01.T01 | Multivesicular body subunit 12B like                                       |
| maker-8-augustus-gene-107.43-mRNA-1 | NA | NA       |               |              |                          |                                                                            |
| maker-8-augustus-gene-108.41-mRNA-1 | NA | NA       |               | Os08g0273300 | OsR498G0815607300.01.T01 | Phytoecyanin domain-containing protein                                     |
| maker-8-augustus-gene-109.0-mRNA-1  | NA | NA       |               | Os08g0276100 | OsR498G0815615900.01.T02 | Photosynthetic NDH subunit of subcomplex B 1 chloroplastic                 |
| maker-8-augustus-gene-109.3-mRNA-1  | NA | NA       |               |              |                          | Transmembrane 9 superfamily member                                         |
| maker-8-augustus-gene-109.5-mRNA-1  | NA | NA       |               | 0            | OsR498G0815616200.01.T02 | WRKY transcription factor                                                  |
| maker-8-augustus-gene-110.33-mRNA-1 | NA | NA       |               | Os08g0277200 | OsR498G0815620900.01.T01 | Epimerase domain-containing protein (Fragment)                             |
| maker-8-augustus-gene-111.25-mRNA-1 | NA | NA       |               |              |                          | Syntaxin-51 isoform A                                                      |
| maker-8-augustus-gene-111.30-mRNA-1 | NA | NA       |               | Os08g0278100 | OsR498G0815624700.01.T01 | vicilin-like seed storage protein At2g18540                                |
| maker-8-augustus-gene-111.33-mRNA-1 | NA | Japonica |               | Os08g0278966 | OsR498G0815628300.01.T01 | Splicing factor subunit                                                    |
| maker-8-augustus-gene-112.26-mRNA-1 | NA | NA       |               | Os08g0280100 | OsR498G0815633100.01.T06 | Purple acid phosphatase                                                    |
| maker-8-augustus-gene-113.38-mRNA-1 | NA | Indica   |               | Os02g0116400 | OsR498G0815634100.01.T01 | Probable metal-nicotianamine transporter YSL17                             |
| maker-8-augustus-gene-114.0-mRNA-1  | NA | Indica   |               | Os02g0116300 | OsR498G0815634100.01.T01 | Probable metal-nicotianamine transporter YSL17                             |
| maker-8-augustus-gene-114.2-mRNA-1  | NA | NA       |               | 0            | OsR498G0815635100.01.T01 | Reticulon domain-containing protein                                        |
| maker-8-augustus-gene-115.36-mRNA-1 | NA | NA       |               |              |                          | F-box domain-containing protein                                            |
| maker-8-augustus-gene-115.41-mRNA-1 | NA | NA       |               | Os08g0282000 | OsR498G0815638800.01.T01 | Tobamovirus multiplication protein like                                    |
| maker-8-augustus-gene-115.45-mRNA-1 | NA | NA       |               | Os08g0448900 |                          | DUF223 domain-containing protein                                           |
| maker-8-augustus-gene-116.43-mRNA-1 | NA | NA       |               | Os08g0282400 | OsR498G0815641700.01.T01 | Alpha-soluble NSF attachment protein 2                                     |
| maker-8-augustus-gene-116.48-mRNA-1 | NA | NA       |               | Os08g0285500 |                          |                                                                            |
| maker-8-augustus-gene-116.50-mRNA-1 | NA | Indica   | Kinase-TM     | Os05g0319700 | OsR498G0815646200.01.T03 | Phytosulfokine receptor                                                    |
| maker-8-augustus-gene-117.29-mRNA-1 | NA | NA       |               | 0            | OsR498G0815647100.01.T01 | Pectate lyase                                                              |
| maker-8-augustus-gene-119.0-mRNA-1  | NA | NA       |               | Os08g0288200 | OsR498G0815658200.01.T02 | Adenylate kinase                                                           |
| maker-8-augustus-gene-119.5-mRNA-1  | NA | NA       |               | Os08g0288500 | OsR498G0815659600.01.T01 | G-patch domain containing protein                                          |
| maker-8-augustus-gene-120.0-mRNA-1  | NA | NA       |               | Os08g0289000 | OsR498G0815661100.01.T01 |                                                                            |
| maker-8-augustus-gene-120.2-mRNA-1  | NA | NA       |               | Os06g0255700 | OsR498G0612023500.01.T05 | Protein CHROMATIN REMODELING 35                                            |
| maker-8-augustus-gene-121.41-mRNA-1 | NA | NA       |               | Os08g0290700 | OsR498G0815667700.01.T01 | O-methyltransferase ZRP4                                                   |
| maker-8-augustus-gene-121.43-mRNA-1 | NA | NA       |               | Os08g0290100 | OsR498G0815665000.01.T03 | Aberrant root formation protein 4                                          |
| maker-8-augustus-gene-121.47-mRNA-1 | NA | NA       |               | Os08g0290400 | OsR498G0815665600.01.T01 | Translation initiation factor IF-2, putative isoform 1                     |
| maker-8-augustus-gene-122.0-mRNA-1  | NA | NA       |               | Os08g0290900 |                          | RNA polymerase Rpb7 N-terminal domain-containing protein                   |
| maker-8-augustus-gene-122.2-mRNA-1  | NA | NA       |               | Os08g0292000 | OsR498G0815672300.01.T02 |                                                                            |

|                                     |    |          |               |              |                          |                                                                  |
|-------------------------------------|----|----------|---------------|--------------|--------------------------|------------------------------------------------------------------|
| maker-8-augustus-gene-123.0-mRNA-1  | NA | Indica   |               | Os08g0292900 | OsR498G0815676500.01.T01 | Homeobox protein knotted-1-like 3 isoform B                      |
| maker-8-augustus-gene-123.5-mRNA-1  | NA | NA       | CC-NBS-TM     | Os08g0293300 | OsR498G0815678600.01.T02 | Disease resistance protein RPM1                                  |
| maker-8-augustus-gene-125.24-mRNA-1 | NA | NA       |               | Os08g0307400 | OsR498G0815726600.01.T05 | Phosphatidylinositol 3-kinase                                    |
| maker-8-augustus-gene-125.31-mRNA-1 | NA | NA       |               | Os08g0295300 | OsR498G0815686000.01.T01 | Threonyl-tRNA synthetase                                         |
| maker-8-augustus-gene-125.40-mRNA-1 | NA | NA       |               | 0            | OsR498G0100492200.01.T06 | Longin domain-containing protein                                 |
| maker-8-augustus-gene-126.2-mRNA-1  | NA | NA       |               | Os12g0468900 | OsR498G0510503700.01.T01 | Cell wall protein-like                                           |
| maker-8-augustus-gene-127.40-mRNA-1 | NA | NA       |               | Os08g0305300 | OsR498G0815720600.01.T05 | DNA/RNA-binding domain                                           |
| maker-8-augustus-gene-128.20-mRNA-1 | NA | NA       |               | Os08g0300200 | OsR498G0815704000.01.T02 | Synaptotagmin-5                                                  |
| maker-8-augustus-gene-128.26-mRNA-1 | NA | NA       |               |              |                          | Far-red impaired response-like                                   |
| maker-8-augustus-gene-128.28-mRNA-1 | NA | Indica   |               | Os08g0300300 | OsR498G0815705100.01.T01 | Chloride channel G                                               |
| maker-8-augustus-gene-128.35-mRNA-1 | NA | NA       |               |              |                          | Fatty acyl-CoA reductase                                         |
| maker-8-augustus-gene-129.31-mRNA-1 | NA | Indica   |               | Os08g0299300 | OsR498G0815698400.01.T02 |                                                                  |
| maker-8-augustus-gene-129.34-mRNA-1 | NA | NA       |               | 0            | OsR498G0407881700.01.T01 | Transposon protein, putative, Mutator sub-class, expressed       |
| maker-8-augustus-gene-129.37-mRNA-1 | NA | Indica   |               | Os07g0421000 | OsR498G0815699500.01.T02 | Monogalactosyldiacylglycerol synthase                            |
| maker-8-augustus-gene-129.39-mRNA-1 | NA | NA       |               | Os08g0299400 | OsR498G0815699300.01.T01 | Monogalactosyldiacylglycerol synthase                            |
| maker-8-augustus-gene-129.42-mRNA-1 | NA | NA       |               | Os08g0299000 | OsR498G0815695900.01.T01 | Memo domain-containing protein                                   |
| maker-8-augustus-gene-13.39-mRNA-1  | NA | NA       |               | 0            | OsR498G0815094500.01.T02 | Calcineurin B-like protein 1                                     |
| maker-8-augustus-gene-13.42-mRNA-1  | NA | Indica   |               | Os08g0395500 | OsR498G0815094500.01.T01 | Bidirectional sugar transporter SWEET                            |
| maker-8-augustus-gene-130.28-mRNA-1 | NA | NA       |               | Os08g0297800 | OsR498G0815691300.01.T01 | Cytosolic sulfotransferase 5                                     |
| maker-8-augustus-gene-131.0-mRNA-1  | NA | NA       |               | Os08g0296900 | OsR498G0815689800.01.T03 | Octicosapeptide/Phox/Bem1p domain-containing protein             |
| maker-8-augustus-gene-132.0-mRNA-1  | NA | NA       | CC-LRR-NBS-TM | Os08g0296600 | OsR498G0815689000.01.T01 | NBS resistance protein (Fragment)                                |
| maker-8-augustus-gene-132.15-mRNA-1 | NA | Indica   |               | Os08g0301600 | OsR498G0815710000.01.T01 |                                                                  |
| maker-8-augustus-gene-132.2-mRNA-1  | NA | NA       |               | Os08g0301500 | OsR498G0815709500.01.T03 | UDP-glucose-fructose-phosphate glucosyltransferase               |
| maker-8-augustus-gene-132.7-mRNA-1  | NA | NA       |               | Os08g0302000 | OsR498G0815712500.01.T01 | Peroxidase                                                       |
| maker-8-augustus-gene-132.9-mRNA-1  | NA | NA       | CC-LRR-NBS-TM | Os08g0296700 | OsR498G0815689300.01.T01 | Putative bacterial blight-resistance protein Xa1                 |
| maker-8-augustus-gene-133.30-mRNA-1 | NA | NA       |               | Os08g0304900 | OsR498G0815719900.01.T05 | DNA-(apurinic or apyrimidinic site) lyase                        |
| maker-8-augustus-gene-134.35-mRNA-1 | NA | NA       |               | Os08g0308100 | OsR498G0815730600.01.T01 | Eukaryotic translation initiation factor 3 subunit I             |
| maker-8-augustus-gene-134.42-mRNA-1 | NA | NA       |               | Os04g0590366 | OsR498G0203601400.01.T01 |                                                                  |
| maker-8-augustus-gene-134.45-mRNA-1 | NA | Indica   |               | Os08g0309225 | OsR498G0815733400.01.T02 | Protein DCL, chloroplastic                                       |
| maker-8-augustus-gene-134.46-mRNA-1 | NA | NA       |               | Os08g0309300 | OsR498G0815736000.01.T04 | Retrieval of early ER protein Rer1                               |
| maker-8-augustus-gene-135.37-mRNA-1 | NA | NA       |               | Os08g0310100 | OsR498G0815738100.01.T02 | 60S ribosomal protein L10, mitochondrial                         |
| maker-8-augustus-gene-135.39-mRNA-1 | NA | NA       |               | Os08g0313200 | OsR498G0815742700.01.T01 | Cystathionine beta-synthase, core                                |
| maker-8-augustus-gene-136.0-mRNA-1  | NA | NA       |               | Os08g0314800 | OsR498G0815746500.01.T01 | Polyadenylate-binding protein (Fragment)                         |
| maker-8-augustus-gene-138.24-mRNA-1 | NA | NA       | Kinase-TM     | Os08g0249100 | OsR498G0815539600.01.T01 | probable receptor-like serine/threonine-protein kinase At5g57670 |
| maker-8-augustus-gene-138.26-mRNA-1 | NA | NA       | Kinase-TM     | Os08g0249100 | OsR498G0815539600.01.T01 | probable receptor-like serine/threonine-protein kinase At5g57670 |
| maker-8-augustus-gene-139.24-mRNA-1 | NA | NA       |               | 0            | OsR498G1120765700.01.T01 | DDE Tnp4 domain-containing protein                               |
| maker-8-augustus-gene-139.26-mRNA-1 | NA | NA       |               |              |                          |                                                                  |
| maker-8-augustus-gene-14.37-mRNA-1  | NA | NA       |               | Os11g0175500 | OsR498G1119504300.01.T05 | E3 ubiquitin-protein ligase CHFR                                 |
| maker-8-augustus-gene-141.0-mRNA-1  | NA | NA       |               | Os08g0318500 | OsR498G0815757200.01.T03 | Exocyst complex component SEC8                                   |
| maker-8-augustus-gene-143.0-mRNA-1  | NA | Indica   |               | Os08g0150800 | OsR498G0815763300.01.T01 | Tyrosyl-tRNA synthetase                                          |
| maker-8-augustus-gene-143.13-mRNA-1 | NA | NA       |               | Os08g0320300 | OsR498G0815765100.01.T02 |                                                                  |
| maker-8-augustus-gene-143.20-mRNA-1 | NA | Indica   |               | Os09g0255400 | OsR498G0815765900.01.T03 | Indole-3-glycerol-phosphate synthase                             |
| maker-8-augustus-gene-143.27-mRNA-1 | NA | NA       |               |              |                          | Putative cytosolic oligopeptidase A                              |
| maker-8-augustus-gene-143.29-mRNA-1 | NA | NA       |               | Os08g0319900 | OsR498G0815763200.01.T02 | Cyclase-like protein 3                                           |
| maker-8-augustus-gene-143.33-mRNA-1 | NA | NA       |               | Os08g0320200 | OsR498G0815765000.01.T02 | Oligopeptide transporter                                         |
| maker-8-augustus-gene-143.35-mRNA-1 | NA | Indica   |               | Os08g0321000 | OsR498G0815767600.01.T01 | Fasciclin-like arabinogalactan protein 2                         |
| maker-8-augustus-gene-143.7-mRNA-1  | NA | NA       |               |              |                          | Heterogeneous nuclear ribonucleoprotein like                     |
| maker-8-augustus-gene-145.29-mRNA-1 | NA | NA       | LRR-TM        | Os08g0322500 | OsR498G0815772300.01.T01 | Putative LRR receptor-like serine/threonine-protein kinase       |
| maker-8-augustus-gene-145.31-mRNA-1 | NA | NA       |               | Os08g0322600 | OsR498G0815773200.01.T01 | 4-hydroxybenzoate polyprenyltransferase, mitochondrial           |
| maker-8-augustus-gene-145.35-mRNA-1 | NA | NA       |               | Os08g0323000 | OsR498G0815774200.01.T01 | Alpha-mannosidase                                                |
| maker-8-augustus-gene-145.36-mRNA-1 | NA | NA       |               | 0            | OsR498G0815774200.01.T05 | Signal recognition particle subunit SRP68                        |
| maker-8-augustus-gene-146.0-mRNA-1  | NA | NA       |               | Os08g0323600 | OsR498G0815779000.01.T02 | CBM20 domain-containing protein (Fragment)                       |
| maker-8-augustus-gene-146.7-mRNA-1  | NA | NA       |               | 0            | OsR498G0815779400.01.T05 | Cation-chloride cotransporter                                    |
| maker-8-augustus-gene-148.32-mRNA-1 | NA | Japonica |               | Os08g0326500 | OsR498G0815786100.01.T01 | (1->3)-beta-glucan endohydrolase                                 |
| maker-8-augustus-gene-149.29-mRNA-1 | NA | NA       |               | Os08g0326600 | OsR498G0815786500.01.T01 | Glutamine amidotransferase                                       |
| maker-8-augustus-gene-149.34-mRNA-1 | NA | NA       |               | 0            | OsR498G0815786700.01.T02 | Subtilisin-like serine protease                                  |
| maker-8-augustus-gene-149.39-mRNA-1 | NA | NA       |               | Os08g0327400 | OsR498G0815789900.01.T05 | Enoyl-ACP reductase                                              |
| maker-8-augustus-gene-150.35-mRNA-1 | NA | NA       |               | Os08g0328300 | OsR498G0815792700.01.T05 | ENT domain-containing protein (Fragment)                         |
| maker-8-augustus-gene-150.41-mRNA-1 | NA | NA       |               |              |                          | DUF1618 domain-containing protein (Fragment)                     |
| maker-8-augustus-gene-151.0-mRNA-1  | NA | NA       |               |              |                          | RNase H domain-containing protein                                |
| maker-8-augustus-gene-151.5-mRNA-1  | NA | NA       |               |              |                          | F-box domain-containing protein                                  |

|                                     |    |          |               |              |                          |                                                                              |
|-------------------------------------|----|----------|---------------|--------------|--------------------------|------------------------------------------------------------------------------|
| maker-8-augustus-gene-152.35-mRNA-1 | NA | Indica   |               | Os09g0281900 | OsR498G0815804700.01.T04 | Mediator of RNA polymerase II transcription subunit 14                       |
| maker-8-augustus-gene-152.44-mRNA-1 | NA | NA       | NBS-TM        |              |                          | NBS-LRR disease resistance protein homologue (Fragment)                      |
| maker-8-augustus-gene-152.46-mRNA-1 | NA | NA       |               | Os08g0332700 | OsR498G0815804200.01.T04 | Dipeptidase 3 (Fragment)                                                     |
| maker-8-augustus-gene-152.52-mRNA-1 | NA | NA       |               | Os08g0333100 | OsR498G0815805400.01.T01 | Cobyric acid synthase (Fragment)                                             |
| maker-8-augustus-gene-152.53-mRNA-1 | NA | NA       |               | Os08g0333100 | OsR498G0815805400.01.T01 |                                                                              |
| maker-8-augustus-gene-154.36-mRNA-1 | NA | Indica   |               | Os08g0334300 | OsR498G0815813300.01.T02 | L-type lectin-domain containing receptor kinase IX.1                         |
| maker-8-augustus-gene-154.39-mRNA-1 | NA | NA       |               |              |                          | DNMT1-RFD domain-containing protein                                          |
| maker-8-augustus-gene-154.43-mRNA-1 | NA | Indica   |               | Os08g0337100 | OsR498G0815817100.01.T01 | Protein ENHANCED DOWNY MILDEW 2 isoform A                                    |
| maker-8-augustus-gene-155.27-mRNA-1 | NA | NA       |               | 0            | OsR498G0815818100.01.T02 | Protein ENHANCED DOWNY MILDEW 2                                              |
| maker-8-augustus-gene-155.35-mRNA-1 | NA | NA       |               | Os08g0337700 | OsR498G0815818800.01.T01 | Growth hormone-regulated TBC protein 1                                       |
| maker-8-augustus-gene-156.24-mRNA-1 | NA | NA       |               | 0            | OsR498G0815825100.01.T01 | Golgin subfamily A member 6-like protein 22 isoform X2                       |
| maker-8-augustus-gene-156.26-mRNA-1 | NA | NA       |               | Os08g0339200 | OsR498G0815827700.01.T03 | D-aminoacyl-tRNA deacylase-like                                              |
| maker-8-augustus-gene-156.35-mRNA-1 | NA | Indica   |               | Os08g0338700 | OsR498G0815825400.01.T01 | GrpE nucleotide exchange factor                                              |
| maker-8-augustus-gene-156.39-mRNA-1 | NA | NA       |               | Os08g0338900 | OsR498G0815826400.01.T02 | Enhancer of polycomb-like protein                                            |
| maker-8-augustus-gene-158.0-mRNA-1  | NA | NA       |               | Os08g0341700 | OsR498G0815835100.01.T02 | Phosphatidylinositol/phosphatidylcholine transfer protein SFH13-like isoform |
| maker-8-augustus-gene-158.16-mRNA-1 | NA | Indica   |               | Os08g0342400 | OsR498G0815837600.01.T01 | Aspartokinase                                                                |
| maker-8-augustus-gene-158.8-mRNA-1  | NA | NA       | Kinase-TM     | Os08g0343000 | OsR498G0815840500.01.T03 | Proline-rich receptor-like protein kinase PERK14 isoform X5                  |
| maker-8-augustus-gene-159.0-mRNA-1  | NA | NA       |               | Os08g0343300 | OsR498G0815842100.01.T01 | Transcription initiation factor IIE subunit alpha                            |
| maker-8-augustus-gene-159.16-mRNA-1 | NA | NA       |               | Os08g0344600 | OsR498G0815845300.01.T01 | Phosphoenolpyruvate/phosphate translocator like                              |
| maker-8-augustus-gene-159.8-mRNA-1  | NA | NA       |               | Os08g0344100 | OsR498G0815843500.01.T02 | Histone deacetylase                                                          |
| maker-8-augustus-gene-160.28-mRNA-1 | NA | Indica   |               | Os08g0345400 | OsR498G0815848100.01.T02 | Rho GTPase-activating protein 21-A (Fragment)                                |
| maker-8-augustus-gene-160.33-mRNA-1 | NA | NA       |               | 0            | OsR498G0815849900.01.T02 | Pyrophosphate-fructose 6-phosphate 1-phosphotransferase subunit alpha        |
| maker-8-augustus-gene-160.37-mRNA-1 | NA | NA       |               | Os08g0363000 | OsR498G0815846800.01.T01 | F-box domain containing protein, expressed                                   |
| maker-8-augustus-gene-161.1-mRNA-1  | NA | Indica   |               | Os09g0299200 | OsR498G0815853100.01.T03 | MYB-CC type transfactor                                                      |
| maker-8-augustus-gene-162.26-mRNA-1 | NA | NA       |               |              |                          |                                                                              |
| maker-8-augustus-gene-162.28-mRNA-1 | NA | NA       |               |              |                          | Photosystem II PsbP, oxygen evolving complex                                 |
| maker-8-augustus-gene-163.0-mRNA-1  | NA | NA       |               | Os08g0349100 | OsR498G0815862900.01.T01 | Dirigent protein (Fragment)                                                  |
| maker-8-augustus-gene-163.2-mRNA-1  | NA | NA       |               | Os08g0352100 | OsR498G0815861800.01.T01 |                                                                              |
| maker-8-augustus-gene-166.0-mRNA-1  | NA | NA       |               | Os08g0352100 | OsR498G0815873600.01.T01 |                                                                              |
| maker-8-augustus-gene-17.39-mRNA-1  | NA | NA       |               | Os08g0129600 | OsR498G0815110800.01.T02 | Protein CHUP1, chloroplastic isoform A                                       |
| maker-8-augustus-gene-170.39-mRNA-1 | NA | NA       |               | Os08g0376500 | OsR498G0815955500.01.T01 | Patatin group A-3                                                            |
| maker-8-augustus-gene-170.40-mRNA-1 | NA | NA       |               | Os08g0376500 | OsR498G0815955500.01.T01 | Patatin group A-3                                                            |
| maker-8-augustus-gene-170.43-mRNA-1 | NA | NA       |               | Os08g0474700 | OsR498G0816298700.01.T04 | Protein transport protein SEC23                                              |
| maker-8-augustus-gene-170.44-mRNA-1 | NA | NA       |               |              |                          | Protein transport protein SEC23                                              |
| maker-8-augustus-gene-170.53-mRNA-1 | NA | NA       |               | Os08g0474500 | OsR498G0816298400.01.T01 | Patatin                                                                      |
| maker-8-augustus-gene-177.44-mRNA-1 | NA | NA       |               | Os08g0360000 | OsR498G0815887100.01.T02 | Thiamine-phosphate synthase                                                  |
| maker-8-augustus-gene-177.57-mRNA-1 | NA | NA       |               | Os08g0359500 | OsR498G0815886000.01.T01 | CS domain                                                                    |
| maker-8-augustus-gene-177.62-mRNA-1 | NA | NA       |               | Os08g0360100 | OsR498G0815887400.01.T01 | Chloroplastic group IIA intron splicing facilitator like                     |
| maker-8-augustus-gene-181.37-mRNA-1 | NA | NA       |               | 0            | OsR498G0815909100.01.T01 |                                                                              |
| maker-8-augustus-gene-181.39-mRNA-1 | NA | NA       |               | Os08g0364900 | OsR498G0815911100.01.T05 | Pirin domain-containing protein                                              |
| maker-8-augustus-gene-181.45-mRNA-1 | NA | Japonica |               | Os08g0363800 | OsR498G0815927700.01.T02 | Iron-sulfur assembly protein IscA-like protein 2, mitochondrial              |
| maker-8-augustus-gene-181.48-mRNA-1 | NA | NA       | Kinase-TM     | Os08g0365800 |                          | Putative WAK family receptor-like protein kinase                             |
| maker-8-augustus-gene-182.25-mRNA-1 | NA | NA       |               | Os08g0366100 | OsR498G0815912500.01.T01 | Multiprotein-bridging factor 1b                                              |
| maker-8-augustus-gene-182.28-mRNA-1 | NA | NA       |               | Os08g0365900 | OsR498G0815911800.01.T04 | Putative methyltransferase NSUN6                                             |
| maker-8-augustus-gene-182.31-mRNA-1 | NA | NA       |               | Os08g0366000 | OsR498G0815912200.01.T01 | Phosphoenolpyruvate carboxylase                                              |
| maker-8-augustus-gene-182.36-mRNA-1 | NA | Indica   |               | Os08g0366200 | OsR498G0815913800.01.T01 | Elf4 domain-containing protein                                               |
| maker-8-augustus-gene-183.19-mRNA-1 | NA | Indica   |               | Os05g0310800 | OsR498G0815920400.01.T01 | Coatomer subunit delta                                                       |
| maker-8-augustus-gene-187.0-mRNA-1  | NA | Indica   |               | Os08g0371476 | OsR498G0815932400.01.T03 | Carotenoid cleavage dioxygenase like b                                       |
| maker-8-augustus-gene-189.26-mRNA-1 | NA | Indica   |               | Os08g0374200 | OsR498G0815944200.01.T01 | UBC core domain-containing protein                                           |
| maker-8-augustus-gene-189.30-mRNA-1 | NA | NA       |               | Os08g0374400 | OsR498G0815946000.01.T01 | DnaJ subfamily B member like                                                 |
| maker-8-augustus-gene-19.1-mRNA-1   | NA | NA       |               | Os08g0132600 | OsR498G0815119900.01.T01 |                                                                              |
| maker-8-augustus-gene-19.14-mRNA-1  | NA | NA       |               |              |                          | rRNA N-glycosidase                                                           |
| maker-8-augustus-gene-19.2-mRNA-1   | NA | Japonica |               | Os08g0132100 | OsR498G0815123300.01.T01 |                                                                              |
| maker-8-augustus-gene-190.0-mRNA-1  | NA | Indica   | Kinase-TM     | Os08g0374600 | OsR498G0815946800.01.T03 | Cytokinin-regulated kinase-like                                              |
| maker-8-augustus-gene-190.8-mRNA-1  | NA | NA       |               | Os08g0374900 | OsR498G0815948000.01.T01 | GATA zinc finger domain-containing protein                                   |
| maker-8-augustus-gene-191.0-mRNA-1  | NA | NA       |               | Os08g0375900 | OsR498G0815953300.01.T02 | Nudix hydrolase                                                              |
| maker-8-augustus-gene-191.10-mRNA-1 | NA | NA       | Kinase-LRR-TM | Os08g0376300 | OsR498G0815955000.01.T01 | Receptor-like protein kinase 5                                               |
| maker-8-augustus-gene-191.2-mRNA-1  | NA | Indica   |               | Os08g0376200 | OsR498G0815954100.01.T01 | Nudix hydrolase                                                              |
| maker-8-augustus-gene-191.6-mRNA-1  | NA | NA       |               | Os08g0376500 | OsR498G0815955500.01.T01 | Patatin group A-3                                                            |
| maker-8-augustus-gene-192.27-mRNA-1 | NA | NA       |               |              |                          | Response regulatory domain-containing protein                                |
| maker-8-augustus-gene-192.29-mRNA-1 | NA | Indica   |               | Os08g0358800 | OsR498G0815959500.01.T01 | Response regulator                                                           |

|                                     |    |          |               |              |                          |                                                                        |
|-------------------------------------|----|----------|---------------|--------------|--------------------------|------------------------------------------------------------------------|
| maker-8-augustus-gene-192.31-mRNA-1 | NA | NA       |               | Os08g0377500 | OsR498G0815960700.01.T01 | NAC domain-containing protein                                          |
| maker-8-augustus-gene-192.33-mRNA-1 | NA | NA       |               | Os08g0377400 | OsR498G0815960600.01.T05 | RNA exonuclease 4                                                      |
| maker-8-augustus-gene-193.43-mRNA-1 | NA | NA       |               | Os08g0379400 | OsR498G0815962200.01.T01 | 2-methylene-furan-3-one reductase                                      |
| maker-8-augustus-gene-194.3-mRNA-1  | NA | NA       |               | Os08g0382400 | OsR498G0815970500.01.T05 | Peptidylprolyl isomerase                                               |
| maker-8-augustus-gene-195.11-mRNA-1 | NA | NA       |               | 0            | OsR498G0815974000.01.T01 | TauD domain-containing protein (Fragment)                              |
| maker-8-augustus-gene-195.13-mRNA-1 | NA | NA       |               | Os08g0384100 | OsR498G0815974800.01.T01 | double-stranded RNA-binding protein 3-like                             |
| maker-8-augustus-gene-195.17-mRNA-1 | NA | Indica   |               | Os08g0384500 | OsR498G0815975800.01.T02 | ABC transporter domain-containing protein                              |
| maker-8-augustus-gene-195.4-mRNA-1  | NA | Indica   |               | Os08g0384000 | OsR498G0815974500.01.T01 | probable transmembrane ascorbate ferireductase 2                       |
| maker-8-augustus-gene-195.7-mRNA-1  | NA | NA       |               | Os08g0384900 | OsR498G0815976700.01.T06 | RING-CH-type domain-containing protein                                 |
| maker-8-augustus-gene-196.19-mRNA-1 | NA | NA       |               |              |                          | Transposon protein, putative, Mutator sub-class, expressed             |
| maker-8-augustus-gene-196.23-mRNA-1 | NA | NA       |               |              |                          | RRM domain-containing protein                                          |
| maker-8-augustus-gene-196.26-mRNA-1 | NA | NA       |               | Os08g0386200 | OsR498G0815979300.01.T01 | Transcription factor WRKY                                              |
| maker-8-augustus-gene-196.28-mRNA-1 | NA | NA       |               |              |                          | Cytochrome B5-like protein isoform A                                   |
| maker-8-augustus-gene-197.0-mRNA-1  | NA | NA       |               | Os08g0386700 | OsR498G0815980500.01.T01 | Hexosyltransferase                                                     |
| maker-8-augustus-gene-197.20-mRNA-1 | NA | NA       |               | Os08g0387200 | OsR498G0815983900.01.T01 | Membrane protein-like                                                  |
| maker-8-augustus-gene-197.3-mRNA-1  | NA | NA       |               | Os08g0386800 | OsR498G0815981100.01.T02 | Manganese tracking factor                                              |
| maker-8-augustus-gene-197.9-mRNA-1  | NA | NA       |               | 0            | OsR498G0815981900.01.T02 | Golgin candidate 4                                                     |
| maker-8-augustus-gene-198.39-mRNA-1 | NA | NA       |               | Os08g0387400 | OsR498G0815984500.01.T01 | Endoglucanase                                                          |
| maker-8-augustus-gene-198.41-mRNA-1 | NA | NA       | LRR-NBS-TM    | Os08g0388300 | OsR498G0815986100.01.T07 |                                                                        |
| maker-8-augustus-gene-198.45-mRNA-1 | NA | NA       |               |              |                          | 4-hydroxybenzoate polyprenyltransferase, mitochondrial                 |
| maker-8-augustus-gene-198.47-mRNA-1 | NA | NA       |               | Os08g0387500 | OsR498G0815985000.01.T02 | Thermosome subunit gamma                                               |
| maker-8-augustus-gene-198.49-mRNA-1 | NA | NA       | LRR-NBS-TM    | Os08g0387700 | OsR498G0815985400.01.T03 | Disease resistance protein RPM1                                        |
| maker-8-augustus-gene-199.0-mRNA-1  | NA | NA       |               | Os08g0389700 | OsR498G0815992300.01.T02 | Membrane protein-like                                                  |
| maker-8-augustus-gene-199.14-mRNA-1 | NA | NA       |               | 0            | OsR498G1221375400.01.T01 | Transposon protein, putative, CACTA, En/Spm sub-class                  |
| maker-8-augustus-gene-199.18-mRNA-1 | NA | Indica   |               | Os08g0390100 | OsR498G0815993800.01.T01 | Retinol dehydrogenase 13                                               |
| maker-8-augustus-gene-199.22-mRNA-1 | NA | NA       |               |              |                          |                                                                        |
| maker-8-augustus-gene-20.35-mRNA-1  | NA | NA       |               |              |                          | Skp1 domain-containing protein                                         |
| maker-8-augustus-gene-201.2-mRNA-1  | NA | Indica   |               | Os08g0393700 | OsR498G0816006600.01.T02 | VAN3-binding protein isoform X4                                        |
| maker-8-augustus-gene-202.0-mRNA-1  | NA | NA       |               | 0            | OsR498G0409137400.01.T01 |                                                                        |
| maker-8-augustus-gene-202.2-mRNA-1  | NA | Indica   |               | Os10g0368400 | OsR498G0816011100.01.T02 | AP complex subunit sigma                                               |
| maker-8-augustus-gene-203.45-mRNA-1 | NA | NA       |               | Os08g0398700 | OsR498G0816027700.01.T01 | Aminopeptidase                                                         |
| maker-8-augustus-gene-203.57-mRNA-1 | NA | NA       |               | Os08g0398800 | OsR498G0816028000.01.T01 | Pre-mRNA cleavage factor Im 25 kDa subunit                             |
| maker-8-augustus-gene-204.12-mRNA-1 | NA | NA       |               | Os08g0399600 | OsR498G0816030200.01.T03 | Elongation factor Ts, mitochondrial                                    |
| maker-8-augustus-gene-204.2-mRNA-1  | NA | NA       |               | Os08g0400300 | OsR498G0816031900.01.T04 | DnaJ subfamily C member 2, N-terminally processed like                 |
| maker-8-augustus-gene-205.7-mRNA-1  | NA | NA       |               | Os08g0401800 | OsR498G0816036000.01.T01 | Phospholipase D                                                        |
| maker-8-augustus-gene-206.5-mRNA-1  | NA | NA       |               | Os08g0404300 | OsR498G0816046500.01.T01 | RpmA                                                                   |
| maker-8-augustus-gene-206.7-mRNA-1  | NA | NA       |               | Os08g0404300 | OsR498G0816046500.01.T01 | RpmA                                                                   |
| maker-8-augustus-gene-21.58-mRNA-1  | NA | Indica   |               | Os04g0627000 | OsR498G0815133600.01.T01 | Homeobox-leucine zipper protein ROC7                                   |
| maker-8-augustus-gene-210.50-mRNA-1 | NA | NA       | CC-LRR-NBS-TM | 0            | OsR498G0816075400.01.T01 | Disease resistance protein RPM1                                        |
| maker-8-augustus-gene-210.52-mRNA-1 | NA | Japonica | CC-LRR-NBS-TM | Os08g0412100 | OsR498G0816076200.01.T01 | Disease resistance protein RPM1                                        |
| maker-8-augustus-gene-210.54-mRNA-1 | NA | NA       |               | Os08g0412200 | OsR498G0816076400.01.T02 | Nucleolar protein 15                                                   |
| maker-8-augustus-gene-210.59-mRNA-1 | NA | NA       |               | Os08g0412500 | OsR498G0816077400.01.T03 | Mitochondrial pyruvate carrier                                         |
| maker-8-augustus-gene-211.59-mRNA-1 | NA | NA       |               | Os08g0413000 | OsR498G0816078200.01.T01 | Cell division control protein 48                                       |
| maker-8-augustus-gene-212.62-mRNA-1 | NA | NA       |               | 0            | OsR498G0816087000.01.T06 | RNA-binding protein 25                                                 |
| maker-8-augustus-gene-214.19-mRNA-1 | NA | NA       |               | Os08g0420600 | OsR498G0816096900.01.T03 | Nucleobase-ascorbate transporter 6                                     |
| maker-8-augustus-gene-215.36-mRNA-1 | NA | NA       |               | Os08g0420700 | OsR498G0816098100.01.T01 |                                                                        |
| maker-8-augustus-gene-215.38-mRNA-1 | NA | NA       |               | Os08g0421900 | OsR498G0816101500.01.T04 | Chromatin remodeling protein like                                      |
| maker-8-augustus-gene-215.41-mRNA-1 | NA | NA       |               | Os08g0422000 | OsR498G0816101700.01.T01 | Lycopene cyclase CruP                                                  |
| maker-8-augustus-gene-215.47-mRNA-1 | NA | Indica   |               | Os08g0422300 | OsR498G0816102300.01.T03 | Replication and maintenance protein (Fragment)                         |
| maker-8-augustus-gene-216.34-mRNA-1 | NA | Indica   |               | Os08g0423500 | OsR498G0816107900.01.T01 | Bifunctional monodehydroascorbate reductase and carbonic anhydrase nec |
| maker-8-augustus-gene-217.46-mRNA-1 | NA | NA       |               | Os08g0423500 | OsR498G0816112000.01.T01 | Type IV inositol polyphosphate 5-phosphatase 9                         |
| maker-8-augustus-gene-219.36-mRNA-1 | NA | Indica   |               | Os08g0428300 | OsR498G0816120800.01.T06 |                                                                        |
| maker-8-augustus-gene-220.0-mRNA-1  | NA | NA       |               | 0            | OsR498G0305881800.01.T01 | Putative far-red impaired response protein                             |
| maker-8-augustus-gene-220.6-mRNA-1  | NA | NA       |               | Os08g0514300 |                          |                                                                        |
| maker-8-augustus-gene-221.6-mRNA-1  | NA | Indica   |               | Os08g0431100 | OsR498G0816137300.01.T01 | Agenet domain-containing protein / bromo-adjacent homology (BAH) doma  |
| maker-8-augustus-gene-221.9-mRNA-1  | NA | Indica   |               | Os09g0408500 | OsR498G0816137700.01.T01 | Heavy metal-associated isoprenylated plant protein 7                   |
| maker-8-augustus-gene-222.16-mRNA-1 | NA | NA       |               | Os08g0431900 | OsR498G0816140400.01.T04 | MADS-box transcription factor                                          |
| maker-8-augustus-gene-222.21-mRNA-1 | NA | NA       |               | Os08g0432500 | OsR498G0816144000.01.T01 | ATP-dependent Clp protease adaptor protein ClpS containing protein     |
| maker-8-augustus-gene-223.44-mRNA-1 | NA | Indica   |               | Os08g0433100 | OsR498G0816148400.01.T03 |                                                                        |
| maker-8-augustus-gene-223.52-mRNA-1 | NA | NA       |               | Os08g0433500 | OsR498G0816149600.01.T01 | NAC domain-containing protein 79                                       |
| maker-8-augustus-gene-225.31-mRNA-1 | NA | Japonica |               | Os08g0435700 | OsR498G0816157500.01.T01 | Transcription factor MYB105                                            |

|                                     |    |          |           |              |                          |                                                                                   |
|-------------------------------------|----|----------|-----------|--------------|--------------------------|-----------------------------------------------------------------------------------|
| maker-8-augustus-gene-225.37-mRNA-1 | NA | NA       |           | 0            | OsR498G0816160500.01.T01 | Membrane peptidase                                                                |
| maker-8-augustus-gene-225.43-mRNA-1 | NA | NA       |           | Os08g0436700 | OsR498G0816161300.01.T02 | NAC (No Apical Meristem) domain transcriptional regulator superfamily protein     |
| maker-8-augustus-gene-225.45-mRNA-1 | NA | NA       |           | Os08g0435800 | OsR498G0816158800.01.T02 | Biotinyl protein ligase (BPL) and lipoyl protein ligase (LPL), catalytic domain c |
| maker-8-augustus-gene-225.48-mRNA-1 | NA | NA       |           | Os08g0435900 | OsR498G0816159000.01.T01 | Chlorophyll a-b binding protein, chloroplastic                                    |
| maker-8-augustus-gene-225.57-mRNA-1 | NA | NA       |           | Os08g0436800 | OsR498G0816162000.01.T01 | Ribosomal protein l34                                                             |
| maker-8-augustus-gene-226.22-mRNA-1 | NA | NA       |           | Os08g0437200 | OsR498G0816162900.01.T01 | Transcription factor MYB30                                                        |
| maker-8-augustus-gene-226.24-mRNA-1 | NA | NA       |           | Os08g0438600 | OsR498G0816166700.01.T02 | Exostosin domain-containing protein (Fragment)                                    |
| maker-8-augustus-gene-226.30-mRNA-1 | NA | NA       |           | Os08g0439000 |                          | ATP-dependent 6-phosphofructokinase 5 chloroplastic                               |
| maker-8-augustus-gene-227.0-mRNA-1  | NA | NA       |           | Os08g0439100 | OsR498G0816168300.01.T02 | START domain                                                                      |
| maker-8-augustus-gene-227.7-mRNA-1  | NA | NA       |           | 0            | OsR498G0816168500.01.T03 | Defective in cullin neddylation protein (Fragment)                                |
| maker-8-augustus-gene-228.42-mRNA-1 | NA | NA       |           |              |                          | Glycosyltransferase 39 like protein (Fragment)                                    |
| maker-8-augustus-gene-231.32-mRNA-1 | NA | Japonica |           | Os03g0643100 | OsR498G0816199700.01.T01 | WAC domain-containing protein                                                     |
| maker-8-augustus-gene-236.2-mRNA-1  | NA | NA       |           | 0            | OsR498G0611768000.01.T01 |                                                                                   |
| maker-8-augustus-gene-246.0-mRNA-1  | NA | NA       |           | Os08g0514800 |                          | Ptta/En/Spm family plant transposase                                              |
| maker-8-augustus-gene-246.8-mRNA-1  | NA | NA       |           | Os08g0472800 | OsR498G0816292400.01.T01 | Absciscic acid 8'-hydroxylase                                                     |
| maker-8-augustus-gene-247.42-mRNA-1 | NA | NA       |           | Os08g0474700 | OsR498G0816298700.01.T04 | Protein transport protein SEC23                                                   |
| maker-8-augustus-gene-247.43-mRNA-1 | NA | NA       |           |              |                          | Protein transport protein SEC23                                                   |
| maker-8-augustus-gene-247.61-mRNA-1 | NA | NA       |           |              |                          | Tuliposide A-converting enzyme 2, chloroplastic                                   |
| maker-8-augustus-gene-249.45-mRNA-1 | NA | NA       |           | 0            | OsR498G0816317400.01.T01 |                                                                                   |
| maker-8-augustus-gene-25.43-mRNA-1  | NA | NA       |           |              |                          |                                                                                   |
| maker-8-augustus-gene-25.45-mRNA-1  | NA | NA       |           | Os08g0144000 | OsR498G0815154900.01.T01 | Myb transcription factor                                                          |
| maker-8-augustus-gene-25.53-mRNA-1  | NA | NA       |           |              |                          |                                                                                   |
| maker-8-augustus-gene-250.27-mRNA-1 | NA | NA       |           | Os08g0480000 | OsR498G0816319500.01.T04 | Protein DETOXIFICATION                                                            |
| maker-8-augustus-gene-250.32-mRNA-1 | NA | NA       |           | Os08g0480800 | OsR498G0816321900.01.T01 | General regulatory factor 2, OMEGA                                                |
| maker-8-augustus-gene-250.35-mRNA-1 | NA | NA       |           | Os03g0193900 | OsR498G0101213400.01.T05 | SERPIN domain-containing protein                                                  |
| maker-8-augustus-gene-250.44-mRNA-1 | NA | NA       |           | Os08g0480200 | OsR498G0816320000.01.T02 | 2-oxoglutarate-dependent dioxygenase 19                                           |
| maker-8-augustus-gene-250.46-mRNA-1 | NA | Indica   |           | Os09g0471000 | OsR498G0816320800.01.T01 | Cysteine dioxygenase                                                              |
| maker-8-augustus-gene-250.49-mRNA-1 | NA | Japonica |           | Os08g0480500 | OsR498G0816321400.01.T04 | Mediator of RNA polymerase II transcription subunit 22b like                      |
| maker-8-augustus-gene-250.52-mRNA-1 | NA | NA       |           | Os08g0481000 | OsR498G0816322600.01.T01 | Pentatricopeptide repeat-containing protein mitochondrial                         |
| maker-8-augustus-gene-251.0-mRNA-1  | NA | Indica   |           | Os02g0572400 | OsR498G0816327100.01.T02 | GTP cyclohydrolase II                                                             |
| maker-8-augustus-gene-251.10-mRNA-1 | NA | NA       |           | Os08g0481200 | OsR498G0816324600.01.T01 | RING-type E3 ubiquitin transferase                                                |
| maker-8-augustus-gene-251.12-mRNA-1 | NA | NA       |           | Os08g0481400 | OsR498G0816325400.01.T01 | Class I homeodomain-leucine zipper protein 4                                      |
| maker-8-augustus-gene-251.14-mRNA-1 | NA | NA       |           | 0            | OsR498G0816326400.01.T01 | Plastidic general dicarboxylate transporter                                       |
| maker-8-augustus-gene-251.17-mRNA-1 | NA | NA       |           | Os08g0482600 | OsR498G0816328200.01.T01 | Phytoecyanin domain-containing protein                                            |
| maker-8-augustus-gene-251.19-mRNA-1 | NA | NA       |           | Os08g0482700 | OsR498G0816328800.01.T01 | Phytoecyanin domain-containing protein (Fragment)                                 |
| maker-8-augustus-gene-251.21-mRNA-1 | NA | NA       |           | Os08g0483100 | OsR498G0816331200.01.T01 | RNA-binding (RRM/RBD/RNP motifs) family protein                                   |
| maker-8-augustus-gene-251.23-mRNA-1 | NA | NA       |           | Os08g0483200 | OsR498G0816331600.01.T03 | 33 kDa ribonucleoprotein, chloroplastic                                           |
| maker-8-augustus-gene-251.3-mRNA-1  | NA | NA       |           | Os08g0482100 | OsR498G0816327300.01.T06 | LETM1 domain-containing protein                                                   |
| maker-8-augustus-gene-252.0-mRNA-1  | NA | NA       |           | 0            | OsR498G0816334900.01.T06 | Mannan endo-1,4-beta-mannosidase                                                  |
| maker-8-augustus-gene-252.11-mRNA-1 | NA | Japonica |           | Os08g0484800 | OsR498G0816337900.01.T01 | Delta-adaptin                                                                     |
| maker-8-augustus-gene-252.14-mRNA-1 | NA | NA       |           |              |                          | Phytoecyanin domain-containing protein                                            |
| maker-8-augustus-gene-252.16-mRNA-1 | NA | NA       |           | Os08g0483900 | OsR498G0816333400.01.T02 | Basic helix-loop-helix transcription factor                                       |
| maker-8-augustus-gene-252.18-mRNA-1 | NA | NA       |           |              |                          | S-adenosyl-L-methionine-dependent methyltransferase superfamily protein           |
| maker-8-augustus-gene-252.25-mRNA-1 | NA | NA       |           | Os08g0484500 | OsR498G0816336600.01.T01 | Phospho-2-dehydro-3-deoxyheptonate aldolase                                       |
| maker-8-augustus-gene-252.4-mRNA-1  | NA |          | Kinase-TM | Os08g0484600 | OsR498G0816337100.01.T01 | Serine/threonine protein kinase OSK4                                              |
| maker-8-augustus-gene-253.0-mRNA-1  | NA | Indica   |           | Os08g0485400 | OsR498G0816340500.01.T03 | NMO domain-containing protein                                                     |
| maker-8-augustus-gene-253.10-mRNA-1 | NA | Indica   |           | Os08g0485700 | OsR498G0816342700.01.T04 | Methyl-CpG-binding domain-containing protein 8                                    |
| maker-8-augustus-gene-253.14-mRNA-1 | NA | NA       |           | 0            | OsR498G0816344300.01.T02 | HMA domain-containing protein                                                     |
| maker-8-augustus-gene-253.31-mRNA-1 | NA | NA       |           | Os08g0485900 | OsR498G0816343400.01.T02 | Haloacid dehalogenase/epoxide hydrolase                                           |
| maker-8-augustus-gene-253.36-mRNA-1 | NA | NA       |           | Os08g0486200 | OsR498G0816344600.01.T06 | Serine/arginine-rich splicing factor like                                         |
| maker-8-augustus-gene-253.38-mRNA-1 | NA | NA       |           | Os08g0486300 | OsR498G0816345400.01.T01 | Transcription factor like                                                         |
| maker-8-augustus-gene-253.4-mRNA-1  | NA | Indica   |           | Os08g0485500 | OsR498G0816341300.01.T01 | EPIDERMAL PATTERNING FACTOR-like protein 3                                        |
| maker-8-augustus-gene-253.6-mRNA-1  | NA | NA       |           | Os08g0485600 | OsR498G0816342100.01.T01 | Methyl-CpG-binding domain-containing protein 8                                    |
| maker-8-augustus-gene-254.0-mRNA-1  | NA | NA       |           | Os08g0487700 | OsR498G0816351900.01.T01 | BHLH transcription factor                                                         |
| maker-8-augustus-gene-254.10-mRNA-1 | NA | NA       |           | Os08g0487900 | OsR498G0816352400.01.T01 | Alpha/beta hydrolase domain-containing protein 17B                                |
| maker-8-augustus-gene-254.2-mRNA-1  | NA | NA       |           | Os08g0488700 | OsR498G0816353700.01.T01 | RRM domain-containing protein                                                     |
| maker-8-augustus-gene-254.5-mRNA-1  | NA | NA       |           | Os08g0487800 | OsR498G0816352200.01.T02 | Heat shock protein HSP 90-alpha                                                   |
| maker-8-augustus-gene-255.31-mRNA-1 | NA | NA       |           | Os08g0489300 | OsR498G0816355900.01.T01 | DNA-3-methyladenine glycosylase-like                                              |
| maker-8-augustus-gene-255.35-mRNA-1 | NA | NA       |           | Os09g0291000 |                          | Ptta/En/Spm family plant transposase                                              |
| maker-8-augustus-gene-255.37-mRNA-1 | NA | NA       |           | Os08g0490000 | OsR498G0816359300.01.T01 | Transcription factor BIM3                                                         |
| maker-8-augustus-gene-256.50-mRNA-1 | NA | NA       |           | 0            | OsR498G0816363100.01.T05 |                                                                                   |

|                                     |    |          |           |              |                          |                                                                        |
|-------------------------------------|----|----------|-----------|--------------|--------------------------|------------------------------------------------------------------------|
| maker-8-augustus-gene-256.55-mRNA-1 | NA | Japonica | Kinase-TM | Os08g0491200 | OsR498G0917686300.01.T03 | Serine/threonine-protein kinase D6PKL1                                 |
| maker-8-augustus-gene-256.57-mRNA-1 | NA | NA       |           | 0            | OsR498G0816364700.01.T02 | C3H1-type domain-containing protein                                    |
| maker-8-augustus-gene-256.60-mRNA-1 | NA | NA       |           | Os08g0492000 | OsR498G0816366500.01.T02 | Oligopeptide transporter                                               |
| maker-8-augustus-gene-256.62-mRNA-1 | NA | NA       |           |              |                          | C2 calcium-dependent membrane targeting                                |
| maker-8-augustus-gene-256.66-mRNA-1 | NA | NA       |           | Os08g0493100 | OsR498G0816370100.01.T01 | F-box domain-containing protein (Fragment)                             |
| maker-8-augustus-gene-256.68-mRNA-1 | NA | NA       |           | 0            | OsR498G0816365000.01.T01 | RRM domain-containing protein                                          |
| maker-8-augustus-gene-256.70-mRNA-1 | NA | NA       |           |              |                          | Heterogeneous nuclear ribonucleoprotein 1                              |
| maker-8-augustus-gene-256.76-mRNA-1 | NA | NA       |           | Os11g0504000 |                          |                                                                        |
| maker-8-augustus-gene-257.41-mRNA-1 | NA | NA       |           | Os08g0493900 | OsR498G0816372500.01.T01 | Elongator complex protein 2                                            |
| maker-8-augustus-gene-257.43-mRNA-1 | NA | NA       |           | 0            | OsR498G0816374300.01.T04 | Leucine-rich receptor-like protein kinase-like                         |
| maker-8-augustus-gene-257.55-mRNA-1 | NA | Indica   |           | Os08g0494400 | OsR498G0816378300.01.T01 |                                                                        |
| maker-8-augustus-gene-257.61-mRNA-1 | NA | NA       |           |              |                          | BTB domain-containing protein (Fragment)                               |
| maker-8-augustus-gene-257.64-mRNA-1 | NA | NA       |           |              |                          | Agamous-like MADS-box protein AGL104                                   |
| maker-8-augustus-gene-257.66-mRNA-1 | NA | NA       |           | Os08g0494300 | OsR498G0816373600.01.T02 | E3 ubiquitin-protein ligase mind-bomb                                  |
| maker-8-augustus-gene-258.13-mRNA-1 | NA | NA       |           | 0            | OsR498G0917547600.01.T01 | rRNA N-glycosidase                                                     |
| maker-8-augustus-gene-258.15-mRNA-1 | NA | NA       |           | Os08g0496800 | OsR498G0816385500.01.T02 | BURP domain-containing protein 13                                      |
| maker-8-augustus-gene-258.23-mRNA-1 | NA | NA       |           | Os08g0496900 | OsR498G0816386000.01.T01 | Transmembrane 9 superfamily member                                     |
| maker-8-augustus-gene-259.41-mRNA-1 | NA | NA       |           | Os08g0497600 | OsR498G0816389500.01.T01 | Putative WD repeat-containing protein C2A9.03 isoform B                |
| maker-8-augustus-gene-259.46-mRNA-1 | NA | NA       |           | Os08g0499100 | OsR498G0816394900.01.T01 | AAA domain-containing protein (Fragment)                               |
| maker-8-augustus-gene-259.48-mRNA-1 | NA | NA       |           | Os08g0499200 | OsR498G0816395300.01.T04 | Chloride channel protein CLC-f                                         |
| maker-8-augustus-gene-259.59-mRNA-1 | NA | NA       |           | Os08g0497900 | OsR498G0816389800.01.T01 | WPP domain-interacting protein 2                                       |
| maker-8-augustus-gene-259.61-mRNA-1 | NA | NA       |           | Os08g0498100 | OsR498G0816390800.01.T01 | Tricin synthase 1                                                      |
| maker-8-augustus-gene-259.63-mRNA-1 | NA | NA       |           | Os08g0498400 | OsR498G0816391800.01.T03 | Caffeoyl-CoA 3-O-methyltransferase 3                                   |
| maker-8-augustus-gene-259.66-mRNA-1 | NA | NA       |           | Os08g0498600 | OsR498G0816392000.01.T01 | Caffeoyl-CoA O-methyltransferase 1                                     |
| maker-8-augustus-gene-259.68-mRNA-1 | NA | NA       |           | Os08g0499300 | OsR498G0816395800.01.T07 | WRKY transcription factor                                              |
| maker-8-augustus-gene-26.1-mRNA-1   | NA | NA       |           | Os08g0144400 | OsR498G0815163200.01.T07 |                                                                        |
| maker-8-augustus-gene-260.0-mRNA-1  | NA | Indica   | LRR-TM    | Os08g0499900 | OsR498G0816398100.01.T01 | F-box protein At-B                                                     |
| maker-8-augustus-gene-260.16-mRNA-1 | NA | NA       |           | Os08g0500900 | OsR498G0816402500.01.T04 | 5'-phosphoribosylglycinamide transformylase                            |
| maker-8-augustus-gene-260.19-mRNA-1 | NA | Japonica |           | Os08g0500000 | OsR498G0816398400.01.T02 | COP9 signalosome complex subunit 6                                     |
| maker-8-augustus-gene-260.2-mRNA-1  | NA | NA       |           | Os08g0500100 | OsR498G0816398500.01.T04 | Peroxin-5                                                              |
| maker-8-augustus-gene-260.23-mRNA-1 | NA | NA       |           | Os08g0500200 | OsR498G0816399000.01.T01 | Pre-mRNA-splicing factor like                                          |
| maker-8-augustus-gene-260.26-mRNA-1 | NA | NA       |           | Os08g0500300 | OsR498G0816399200.01.T02 | PPM-type phosphatase domain-containing protein (Fragment)              |
| maker-8-augustus-gene-260.29-mRNA-1 | NA | NA       |           | Os08g0500700 | OsR498G0816402000.01.T01 | Heat shock protein 90                                                  |
| maker-8-augustus-gene-261.13-mRNA-1 | NA | NA       |           | Os08g0502000 | OsR498G0816407600.01.T02 | Protein ENHANCED DOWNY MILDEW 2                                        |
| maker-8-augustus-gene-261.19-mRNA-1 | NA | NA       |           | Os08g0502700 | OsR498G0816409800.01.T02 | Alanine--glyoxylate aminotransferase                                   |
| maker-8-augustus-gene-261.22-mRNA-1 | NA | NA       |           | 0            | OsR498G0816414000.01.T02 |                                                                        |
| maker-8-augustus-gene-261.3-mRNA-1  | NA | Indica   | Kinase-TM | Os08g0501700 | OsR498G0816405900.01.T01 | Wall-associated kinase-like                                            |
| maker-8-augustus-gene-261.6-mRNA-1  | NA | NA       |           | Os08g0502800 | OsR498G0816410700.01.T01 | Upstream activation factor subunit spp27 like                          |
| maker-8-augustus-gene-261.9-mRNA-1  | NA | NA       |           | Os08g0503200 | OsR498G0816414100.01.T01 | Glycerophosphodiester phosphodiesterase                                |
| maker-8-augustus-gene-262.0-mRNA-1  | NA | NA       |           | Os08g0503700 | OsR498G0816415100.01.T01 | Tonoplast dicarboxylate transporter                                    |
| maker-8-augustus-gene-262.2-mRNA-1  | NA | NA       |           | Os08g0503800 | OsR498G0816415500.01.T04 | Beta-2-xylosyltransferase                                              |
| maker-8-augustus-gene-266.41-mRNA-1 | NA | NA       |           | Os08g0510300 | OsR498G0816445100.01.T01 | Potassium transporter                                                  |
| maker-8-augustus-gene-266.50-mRNA-1 | NA | Japonica |           | Os08g0510400 | OsR498G0816445400.01.T03 | 3-oxoacyl-[acyl-carrier-protein] reductase FabG                        |
| maker-8-augustus-gene-267.38-mRNA-1 | NA | Indica   |           | Os08g0512400 | OsR498G0816451600.01.T03 | AT-hook motif nuclear-localized protein (Fragment)                     |
| maker-8-augustus-gene-268.40-mRNA-1 | NA | NA       |           | Os08g0514300 |                          |                                                                        |
| maker-8-augustus-gene-268.45-mRNA-1 | NA | NA       |           | Os08g0514800 |                          | Ptta/En/Spm family plant transposase                                   |
| maker-8-augustus-gene-269.37-mRNA-1 | NA | NA       |           |              |                          | BTB domain-containing protein                                          |
| maker-8-augustus-gene-27.0-mRNA-1   | NA | Indica   |           | Os08g0144400 | OsR498G0815168200.01.T04 | Sm protein E                                                           |
| maker-8-augustus-gene-27.7-mRNA-1   | NA | NA       |           | 0            | OsR498G0815171800.01.T01 |                                                                        |
| maker-8-augustus-gene-271.28-mRNA-1 | NA | NA       |           | Os08g0519600 | OsR498G0816476700.01.T02 | Ribosomal protein L34Ae                                                |
| maker-8-augustus-gene-271.38-mRNA-1 | NA | NA       |           | Os08g0519400 | OsR498G0816475800.01.T07 | Myosin heavy chain-related                                             |
| maker-8-augustus-gene-271.43-mRNA-1 | NA | NA       |           | Os08g0519900 |                          | Exocyst subunit Exo70 family protein (Fragment)                        |
| maker-8-augustus-gene-271.49-mRNA-1 | NA | NA       |           | Os08g0520500 | OsR498G0816479800.01.T03 | Auxin response factor                                                  |
| maker-8-augustus-gene-275.28-mRNA-1 | NA | NA       |           |              |                          | Ferredoxin-plastoquinone reductase, PGR5-like protein 1, chloroplastic |
| maker-8-augustus-gene-275.35-mRNA-1 | NA | NA       |           |              |                          | UBA domain-containing protein (Fragment)                               |
| maker-8-augustus-gene-275.39-mRNA-1 | NA | NA       |           | 0            | OsR498G0816499400.01.T01 | E3 ubiquitin ligase RNF4                                               |
| maker-8-augustus-gene-275.44-mRNA-1 | NA | NA       |           | Os08g0527100 | OsR498G0816502800.01.T01 | Ubiquitinyl hydrolase 1                                                |
| maker-8-augustus-gene-275.46-mRNA-1 | NA | NA       |           | 0            | OsR498G0816503000.01.T01 | Ubiquitinyl hydrolase 1                                                |
| maker-8-augustus-gene-275.48-mRNA-1 | NA | Indica   |           | Os08g0527400 | OsR498G0816503600.01.T01 | Ubiquitinyl hydrolase 1                                                |
| maker-8-augustus-gene-276.11-mRNA-1 | NA | Japonica |           | Os08g0527900 | OsR498G0816500700.01.T02 | Ubiquitinyl hydrolase 1                                                |
| maker-8-augustus-gene-276.12-mRNA-1 | NA | Japonica |           | Os08g0528000 | OsR498G0816506000.01.T01 | Ubiquitinyl hydrolase 1                                                |



|                                      |    |          |               |              |                          |                                                                           |
|--------------------------------------|----|----------|---------------|--------------|--------------------------|---------------------------------------------------------------------------|
| maker-8-augustus-gene-276.19-mRNA-1  | NA | NA       |               | Os08g0528100 |                          | Ubiquitinyl hydrolase 1                                                   |
| maker-8-augustus-gene-276.2-mRNA-1   | NA | NA       |               | Os08g0529100 | OsR498G0816510300.01.T01 | Proteasome endopeptidase complex                                          |
| maker-8-augustus-gene-276.34-mRNA-1  | NA | Japonica |               | Os08g0529200 | OsR498G0816510600.01.T01 | CBS domain-containing protein CBSX6                                       |
| maker-8-augustus-gene-276.7-mRNA-1   | NA | NA       |               |              |                          | Ubiquitinyl hydrolase 1                                                   |
| maker-8-augustus-gene-277.31-mRNA-1  | NA | NA       |               | Os08g0530000 | OsR498G0816513700.01.T01 | Uridine kinase                                                            |
| maker-8-augustus-gene-277.37-mRNA-1  | NA | Indica   |               | Os07g0294800 | OsR498G0816513900.01.T01 | Regulatory protein-like                                                   |
| maker-8-augustus-gene-277.45-mRNA-1  | NA | Indica   |               | Os08g0531000 | OsR498G0816517100.01.T01 | Purple acid phosphatase                                                   |
| maker-8-augustus-gene-277.46-mRNA-1  | NA | NA       |               | Os08g0531000 | OsR498G0816517100.01.T02 | Purple acid phosphatase                                                   |
| maker-8-augustus-gene-277.67-mRNA-1  | NA | NA       |               | Os08g0530500 | OsR498G0816516200.01.T01 | COMM domain-containing protein 9                                          |
| maker-8-augustus-gene-279.36-mRNA-1  | NA | NA       |               | Os08g0533700 | OsR498G0816524900.01.T03 | Vesicle transport protein, Use                                            |
| maker-8-augustus-gene-279.45-mRNA-1  | NA | NA       |               | Os08g0534900 | OsR498G0816525300.01.T04 | TOG domain-containing protein (Fragment)                                  |
| maker-8-augustus-gene-280.103-mRNA-1 | NA | NA       |               | Os08g0535100 | OsR498G0816528200.01.T01 |                                                                           |
| maker-8-augustus-gene-280.33-mRNA-1  | NA | NA       |               |              |                          | Membrane fusion protein Use1                                              |
| maker-8-augustus-gene-280.34-mRNA-1  | NA | Indica   |               | Os02g0305801 | OsR498G0816525900.01.T01 | EKC/KEOPS complex, subunit Pcc1                                           |
| maker-8-augustus-gene-280.35-mRNA-1  | NA | NA       |               | Os08g0534900 | OsR498G0816525300.01.T04 | TOG domain-containing protein (Fragment)                                  |
| maker-8-augustus-gene-280.36-mRNA-1  | NA | NA       |               |              |                          | Membrane fusion protein Use1                                              |
| maker-8-augustus-gene-280.37-mRNA-1  | NA | Indica   |               | Os02g0305801 | OsR498G0816525900.01.T01 | EKC/KEOPS complex, subunit Pcc1                                           |
| maker-8-augustus-gene-283.24-mRNA-1  | NA | NA       |               | Os10g0356500 |                          | Photosystem II CP47 reaction center protein (Fragment)                    |
| maker-8-augustus-gene-29.0-mRNA-1    | NA | NA       | Kinase-LRR-TM | 0            | OsR498G0815185900.01.T01 | Leucine-rich repeat receptor-like protein kinase TDR                      |
| maker-8-augustus-gene-29.2-mRNA-1    | NA | NA       |               | 0            | OsR498G0815186100.01.T02 | NAC domain-containing protein                                             |
| maker-8-augustus-gene-29.4-mRNA-1    | NA | Indica   |               | Os08g0148233 | OsR498G0815184400.01.T01 | Organic cation/carnitine transporter 4                                    |
| maker-8-augustus-gene-29.5-mRNA-1    | NA | NA       |               | Os08g0148233 |                          | Rhizopine catabolism protein Moca                                         |
| maker-8-augustus-gene-294.51-mRNA-1  | NA | NA       |               | Os08g0559300 | OsR498G0816606900.01.T01 | Probable UDP-N-acetylglucosamine--peptide N-acetylglucosaminyltransferase |
| maker-8-augustus-gene-294.65-mRNA-1  | NA | NA       |               | Os08g0559900 | OsR498G0816608500.01.T02 | Nucleotidyltransferase family protein                                     |
| maker-8-augustus-gene-294.69-mRNA-1  | NA | NA       |               | Os08g0560000 | OsR498G0816609100.01.T01 | Fe2OG dioxygenase domain-containing protein (Fragment)                    |
| maker-8-augustus-gene-294.74-mRNA-1  | NA | NA       |               | Os03g0832200 | OsR498G0307318800.01.T01 | Calreticulin                                                              |
| maker-8-augustus-gene-294.91-mRNA-1  | NA | NA       |               | Os08g0560300 | OsR498G0816611600.01.T01 | PLATZ transcription factor family protein isoform 1                       |
| maker-8-augustus-gene-297.42-mRNA-1  | NA | NA       |               | Os08g0567200 | OsR498G0816635000.01.T03 | RRM domain-containing protein (Fragment)                                  |
| maker-8-augustus-gene-3.42-mRNA-1    | NA | NA       |               | Os08g0104900 | OsR498G0815037400.01.T01 | TPT domain-containing protein                                             |
| maker-8-augustus-gene-3.44-mRNA-1    | NA | NA       |               | Os08g0105000 | OsR498G0815037800.01.T01 | PHD finger protein EHD3                                                   |
| maker-8-augustus-gene-30.44-mRNA-1   | NA | Indica   |               | Os08g0149000 | OsR498G0815188200.01.T01 | Glycosyltransferase                                                       |
| maker-8-augustus-gene-30.46-mRNA-1   | NA | Indica   |               | Os08g0144400 | OsR498G0815188200.01.T03 | S1 motif domain-containing protein                                        |
| maker-8-augustus-gene-30.48-mRNA-1   | NA | Indica   |               | Os08g0149000 | OsR498G0815188200.01.T02 | RING-H2 finger protein ATL2A                                              |
| maker-8-augustus-gene-30.59-mRNA-1   | NA | NA       |               |              |                          | Endoribonuclease Dicer 3a                                                 |
| maker-8-augustus-gene-31.27-mRNA-1   | NA | NA       | CC-NBS-TM     | 0            | OsR498G0815193900.01.T01 | ADP-ribosyl cyclase/cyclic ADP-ribose hydrolase                           |
| maker-8-augustus-gene-31.44-mRNA-1   | NA | NA       |               | Os08g0151400 | OsR498G0815199900.01.T01 | Small nuclear ribonucleoprotein E                                         |
| maker-8-augustus-gene-31.49-mRNA-1   | NA | NA       |               | Os08g0151600 | OsR498G0815200500.01.T01 | C-terminal binding protein an-like                                        |
| maker-8-augustus-gene-31.51-mRNA-1   | NA | NA       |               | Os08g0151700 | OsR498G0815200500.01.T03 | RING/U-box superfamily protein                                            |
| maker-8-augustus-gene-31.54-mRNA-1   | NA | Indica   |               | Os08g0151800 | OsR498G0815200700.01.T03 | Monodehydroascorbate reductase 5 mitochondrial                            |
| maker-8-augustus-gene-31.65-mRNA-1   | NA | NA       |               | Os08g0151300 | OsR498G0815199200.01.T01 | Transcription factor MYB26                                                |
| maker-8-augustus-gene-32.34-mRNA-1   | NA | NA       |               | 0            | OsR498G0815201500.01.T01 | Aquaporin NIP-3                                                           |
| maker-8-augustus-gene-33.51-mRNA-1   | NA | NA       |               | Os08g0154900 | OsR498G0815211900.01.T02 | Oxysterol-binding protein-related protein 2A                              |
| maker-8-augustus-gene-33.57-mRNA-1   | NA | NA       |               | Os08g0155100 | OsR498G0815212500.01.T01 | MSP domain                                                                |
| maker-8-augustus-gene-33.69-mRNA-1   | NA | Indica   |               | Os08g0155000 | OsR498G0815212200.01.T01 | U3 small nucleolar ribonucleoprotein protein IMP4                         |
| maker-8-augustus-gene-34.30-mRNA-1   | NA | Indica   |               | Os08g0155400 | OsR498G0815213400.01.T01 | Solute carrier family 15 (Peptide/histidine transporter), member 3/4      |
| maker-8-augustus-gene-34.33-mRNA-1   | NA | Indica   |               | Os05g0151000 | OsR498G0815217400.01.T03 | DNA-directed RNA polymerase subunit                                       |
| maker-8-augustus-gene-34.34-mRNA-1   | NA | Indica   |               | Os05g0151000 | OsR498G0815219000.01.T02 | DNA-directed RNA polymerase subunit                                       |
| maker-8-augustus-gene-35.24-mRNA-1   | NA | NA       |               | Os08g0156600 | OsR498G0815224500.01.T01 | Glycerol-3-phosphate transporter 1                                        |
| maker-8-augustus-gene-35.26-mRNA-1   | NA | NA       |               | Os08g0156800 | OsR498G0815224900.01.T01 | Ribosomal protein L34                                                     |
| maker-8-augustus-gene-35.28-mRNA-1   | NA | NA       | Kinase-TM     | Os08g0157000 | OsR498G0815225900.01.T01 | Mitogen-activated protein kinase                                          |
| maker-8-augustus-gene-35.30-mRNA-1   | NA | NA       |               | Os08g0156700 | OsR498G0815224800.01.T01 | MSP domain-containing protein (Fragment)                                  |
| maker-8-augustus-gene-35.35-mRNA-1   | NA | NA       |               | Os08g0156900 | OsR498G0815225400.01.T01 | Meiotic recombination protein like                                        |
| maker-8-augustus-gene-35.39-mRNA-1   | NA | NA       |               |              |                          | RNA polymerase II-associated factor 1 (Fragment)                          |
| maker-8-augustus-gene-36.39-mRNA-1   | NA | NA       |               | Os08g0158500 | OsR498G0815235900.01.T03 | PHB domain-containing protein (Fragment)                                  |
| maker-8-augustus-gene-36.46-mRNA-1   | NA | Indica   |               | Os08g0158600 | OsR498G0815236300.01.T01 |                                                                           |
| maker-8-augustus-gene-36.51-mRNA-1   | NA | NA       |               | Os08g0157800 | OsR498G0815232800.01.T01 |                                                                           |
| maker-8-augustus-gene-36.55-mRNA-1   | NA | NA       |               | Os08g0157900 | OsR498G0815233600.01.T02 | NAC domain-containing protein 78                                          |
| maker-8-augustus-gene-36.58-mRNA-1   | NA | NA       |               | Os08g0158900 | OsR498G0815236600.01.T02 | Nucleolar GTP-binding protein 1                                           |
| maker-8-augustus-gene-38.10-mRNA-1   | NA | Indica   |               | Os05g0243300 | OsR498G0815249300.01.T01 | Ribosomal protein L13                                                     |
| maker-8-augustus-gene-39.17-mRNA-1   | NA | NA       |               | Os03g0577200 | OsR498G0306434900.01.T06 | MOB kinase activator-like 1                                               |
| maker-8-augustus-gene-39.23-mRNA-1   | NA | NA       |               | Os08g0163500 | OsR498G0815257100.01.T01 | Nuclear factor 1 A-type isoform 2                                         |

|                                    |    |          |                  |              |                          |                                                                 |
|------------------------------------|----|----------|------------------|--------------|--------------------------|-----------------------------------------------------------------|
| maker-8-augustus-gene-39.25-mRNA-1 | NA | NA       |                  | Os08g0162800 | OsR498G0815254000.01.T01 | ACB domain-containing protein (Fragment)                        |
| maker-8-augustus-gene-39.28-mRNA-1 | NA | NA       |                  | Os08g0163100 | OsR498G0306434400.01.T02 | Nuf2 family protein, expressed                                  |
| maker-8-augustus-gene-41.11-mRNA-1 | NA | NA       |                  | Os08g0167400 | OsR498G0815269800.01.T01 | Pentatricopeptide (PPR) repeat-containing protein-like          |
| maker-8-augustus-gene-41.4-mRNA-1  | NA | NA       |                  | Os08g0167500 | OsR498G0815270100.01.T02 | Chlororespiratory reduction 6                                   |
| maker-8-augustus-gene-42.33-mRNA-1 | NA | NA       |                  | Os08g0168700 | OsR498G0815272900.01.T02 | Glycosyltransferase                                             |
| maker-8-augustus-gene-42.42-mRNA-1 | NA | NA       |                  | 0            | OsR498G0815276700.01.T02 | Elongin-A                                                       |
| maker-8-augustus-gene-42.52-mRNA-1 | NA | NA       |                  | 0            | OsR498G0815277000.01.T01 | Thyroid adenoma-associated                                      |
| maker-8-augustus-gene-42.55-mRNA-1 | NA | Indica   | CC-LRR-NBS-TM    | Os08g0170700 | OsR498G0815277600.01.T01 | NAC domain-containing protein                                   |
| maker-8-augustus-gene-43.0-mRNA-1  | NA | NA       | NBS-TM           | Os08g0170200 | OsR498G0815279900.01.T01 | Disease resistance protein RPP13                                |
| maker-8-augustus-gene-43.13-mRNA-1 | NA | Indica   | CC-NBS-TM        | Os05g0240200 | OsR498G0815285000.01.T01 | AAA domain-containing protein                                   |
| maker-8-augustus-gene-43.17-mRNA-1 | NA | NA       |                  | Os08g0170900 | OsR498G0815285200.01.T01 |                                                                 |
| maker-8-augustus-gene-43.19-mRNA-1 | NA | Indica   |                  | Os08g0171100 | OsR498G0815286000.01.T03 | AP2-like ethylene-responsive transcription factor AIL1          |
| maker-8-augustus-gene-43.20-mRNA-1 | NA | NA       |                  | 0            | OsR498G0815286000.01.T01 | AP2-like ethylene-responsive transcription factor AIL1          |
| maker-8-augustus-gene-43.3-mRNA-1  | NA | NA       |                  | Os08g0171000 | OsR498G0815285700.01.T01 | Transmembrane protein                                           |
| maker-8-augustus-gene-44.0-mRNA-1  | NA | NA       |                  | 0            | OsR498G0815289900.01.T01 |                                                                 |
| maker-8-augustus-gene-44.11-mRNA-1 | NA | Indica   |                  | Os04g0641000 | OsR498G0815288000.01.T01 | DNA-directed RNA polymerase subunit beta                        |
| maker-8-augustus-gene-44.2-mRNA-1  | NA | Indica   |                  | Os08g0172200 | OsR498G0815291700.01.T04 | UvrB/uvrC motif-containing protein                              |
| maker-8-augustus-gene-44.7-mRNA-1  | NA | NA       |                  | 0            | OsR498G0815292100.01.T02 | TF-type domain-containing protein (Fragment)                    |
| maker-8-augustus-gene-46.39-mRNA-1 | NA | Japonica | Kinase-TM        | Os08g0176200 | OsR498G0815299300.01.T01 | LRR receptor kinase SERK2                                       |
| maker-8-augustus-gene-46.41-mRNA-1 | NA | NA       | NBS              | Os08g0176633 |                          | Disease resistance RPP13-like protein 4                         |
| maker-8-augustus-gene-50.35-mRNA-1 | NA | NA       |                  | 0            | OsR498G0815325400.01.T01 |                                                                 |
| maker-8-augustus-gene-51.36-mRNA-1 | NA | Indica   |                  | Os08g0183900 | OsR498G0815328600.01.T03 | Dihydroflavonol-4-reductase                                     |
| maker-8-augustus-gene-52.0-mRNA-1  | NA | Indica   |                  | Os04g0627000 | OsR498G0815332900.01.T01 | Homeobox-leucine zipper protein MERISTEM L1                     |
| maker-8-augustus-gene-52.10-mRNA-1 | NA | NA       |                  | Os08g0188900 | OsR498G0815336300.01.T01 | Germin-like protein 8-2                                         |
| maker-8-augustus-gene-52.12-mRNA-1 | NA | NA       |                  | Os08g0189100 | OsR498G0815336500.01.T01 | Germin-like protein 8-2                                         |
| maker-8-augustus-gene-52.14-mRNA-1 | NA | NA       |                  | Os08g0187700 | OsR498G0815333200.01.T01 | Polyadenylation and cleavage factor homolog 5                   |
| maker-8-augustus-gene-52.17-mRNA-1 | NA | NA       |                  | Os08g0188000 | OsR498G0815334200.01.T01 | CRS2-associated factor 2 mitochondrial                          |
| maker-8-augustus-gene-52.4-mRNA-1  | NA | NA       |                  | Os08g0187800 | OsR498G0815333700.01.T03 | Glucose-6-phosphate/phosphate translocator                      |
| maker-8-augustus-gene-52.6-mRNA-1  | NA | NA       |                  | 0            | OsR498G0815334900.01.T04 |                                                                 |
| maker-8-augustus-gene-53.35-mRNA-1 | NA | NA       |                  | Os08g0189200 | OsR498G0815337700.01.T01 | Germin-like protein 8-3                                         |
| maker-8-augustus-gene-53.37-mRNA-1 | NA | NA       |                  | Os08g0189400 | OsR498G0815338500.01.T01 | Germin-like protein 8-5                                         |
| maker-8-augustus-gene-53.39-mRNA-1 | NA | NA       |                  | Os08g0189500 | OsR498G0815338900.01.T01 | Germin-like protein 8-6                                         |
| maker-8-augustus-gene-53.41-mRNA-1 | NA | NA       |                  | Os08g0189600 | OsR498G0815339300.01.T01 | Germin-like protein 8-7                                         |
| maker-8-augustus-gene-53.43-mRNA-1 | NA | NA       |                  | Os08g0189700 | OsR498G0815340100.01.T01 | Germin-like protein 8-8                                         |
| maker-8-augustus-gene-53.45-mRNA-1 | NA | NA       |                  | Os08g0189850 | OsR498G0815340500.01.T01 | Germin-like protein 8-9                                         |
| maker-8-augustus-gene-53.47-mRNA-1 | NA | NA       |                  | Os08g0189900 | OsR498G0815341300.01.T01 | Germin-like protein 8-8                                         |
| maker-8-augustus-gene-53.51-mRNA-1 | NA | Indica   |                  | Os04g0625800 | OsR498G0815342400.01.T04 | RNA-binding post-transcriptional regulator csx1                 |
| maker-8-augustus-gene-53.54-mRNA-1 | NA | Japonica | CC-LRR-NBS-TM    | Os08g0190300 | OsR498G0815343400.01.T01 |                                                                 |
| maker-8-augustus-gene-53.56-mRNA-1 | NA | Indica   |                  | Os08g0190800 | OsR498G0815344800.01.T02 | Cysteine-rich PDZ-binding protein (Fragment)                    |
| maker-8-augustus-gene-54.0-mRNA-1  | NA | NA       |                  | Os08g0191200 | OsR498G0815345500.01.T01 | Glycinamide ribonucleotide synthetase                           |
| maker-8-augustus-gene-54.13-mRNA-1 | NA | NA       |                  | Os08g0192200 | OsR498G0815348700.01.T05 |                                                                 |
| maker-8-augustus-gene-54.16-mRNA-1 | NA | Indica   |                  | Os03g0136900 | OsR498G0815345200.01.T01 | Aconitate hydratase, cytoplasmic                                |
| maker-8-augustus-gene-54.2-mRNA-1  | NA | Indica   |                  | Os04g0624600 | OsR498G0815345700.01.T01 | Starch synthase IIIa                                            |
| maker-8-augustus-gene-54.22-mRNA-1 | NA | NA       |                  | Os08g0191700 | OsR498G0815347200.01.T01 | Glyoxalase I                                                    |
| maker-8-augustus-gene-54.27-mRNA-1 | NA | NA       |                  | Os08g0191800 | OsR498G0815347600.01.T01 | Tyrosyl-tRNA synthetase                                         |
| maker-8-augustus-gene-54.31-mRNA-1 | NA | Indica   |                  | Os08g0192400 | OsR498G0815349000.01.T01 | SWR1 complex subunit 2                                          |
| maker-8-augustus-gene-55.0-mRNA-1  | NA | NA       |                  | Os08g0192800 | OsR498G0815350700.01.T01 | Transcription factor GTE7                                       |
| maker-8-augustus-gene-55.14-mRNA-1 | NA | NA       |                  | Os08g0192900 | OsR498G0815351000.01.T01 | Nucleolin                                                       |
| maker-8-augustus-gene-55.20-mRNA-1 | NA | Japonica |                  | Os08g0193200 | OsR498G0815353200.01.T01 | Putative F-box/LRR-repeat protein 23                            |
| maker-8-augustus-gene-55.3-mRNA-1  | NA | NA       |                  | 0            | OsR498G0815352500.01.T03 | Solanesyl-diphosphate synthase 1, mitochondrial-like isoform X2 |
| maker-8-augustus-gene-57.49-mRNA-1 | NA | NA       |                  | Os08g0197000 | OsR498G0815365300.01.T01 | F-box domain-containing protein                                 |
| maker-8-augustus-gene-57.52-mRNA-1 | NA | Indica   |                  | Os08g0197050 | OsR498G0815365500.01.T01 | F-box domain-containing protein                                 |
| maker-8-augustus-gene-57.59-mRNA-1 | NA | NA       |                  | Os08g0197200 | OsR498G0815366100.01.T01 | FBD domain-containing protein                                   |
| maker-8-augustus-gene-57.63-mRNA-1 | NA | NA       |                  | Os08g0197500 | OsR498G0815367100.01.T01 | Cytochrome c oxidase subunit 5B mitochondrial                   |
| maker-8-augustus-gene-57.71-mRNA-1 | NA | NA       |                  | Os08g0197800 |                          | F-box domain-containing protein                                 |
| maker-8-augustus-gene-57.75-mRNA-1 | NA | NA       |                  | Os08g0198000 |                          | Zinc finger BED domain-containing protein DAYSLEEPER            |
| maker-8-augustus-gene-59.0-mRNA-1  | NA | NA       | Kinase           | Os08g0200500 | OsR498G0815381500.01.T04 | Serine/threonine-protein kinase receptor                        |
| maker-8-augustus-gene-60.8-mRNA-1  | NA | Indica   | CC-Kinase-LRR-TM | Os08g0201700 | OsR498G0815385700.01.T13 | Non-specific serine/threonine protein kinase                    |
| maker-8-augustus-gene-67.32-mRNA-1 | NA | NA       |                  | 0            | OsR498G0815426900.01.T05 |                                                                 |
| maker-8-augustus-gene-67.33-mRNA-1 | NA | NA       |                  | Os08g0216900 | OsR498G0815426000.01.T02 |                                                                 |
| maker-8-augustus-gene-68.30-mRNA-1 | NA | NA       |                  | Os01g0500400 | OsR498G0101057900.01.T01 |                                                                 |

|                                     |    |          |               |              |                          |                                                                  |
|-------------------------------------|----|----------|---------------|--------------|--------------------------|------------------------------------------------------------------|
| maker-8-augustus-gene-68.32-mRNA-1  | NA | NA       |               | Os08g0216000 |                          | Heat shock cognate 70 kDa protein 1                              |
| maker-8-augustus-gene-69.0-mRNA-1   | NA | NA       | Kinase        | Os08g0200500 | OsR498G0815381500.01.T04 | Serine/threonine-protein kinase receptor                         |
| maker-8-augustus-gene-69.5-mRNA-1   | NA | NA       |               | Os08g0200600 | OsR498G0815382000.01.T02 | NAC transcription factor                                         |
| maker-8-augustus-gene-70.36-mRNA-1  | NA | NA       |               | Os01g0500400 | OsR498G0101057900.01.T01 |                                                                  |
| maker-8-augustus-gene-71.32-mRNA-1  | NA | NA       |               |              |                          | ARM repeat superfamily protein                                   |
| maker-8-augustus-gene-71.36-mRNA-1  | NA | NA       |               | Os08g0216000 |                          | Heat shock cognate 70 kDa protein 1                              |
| maker-8-augustus-gene-72.32-mRNA-1  | NA | NA       |               | 0            | OsR498G0815426900.01.T05 |                                                                  |
| maker-8-augustus-gene-73.1-mRNA-1   | NA | NA       |               | Os08g0239300 | OsR498G0815510700.01.T01 | DLH domain-containing protein                                    |
| maker-8-augustus-gene-79.30-mRNA-1  | NA | NA       |               | Os08g0223900 | OsR498G0815461300.01.T05 | Terpene cyclase/mutase family member                             |
| maker-8-augustus-gene-79.35-mRNA-1  | NA | NA       | Kinase-TM     | Os08g0224100 | OsR498G0815462500.01.T01 | serine/threonine-protein kinase STY13                            |
| maker-8-augustus-gene-79.51-mRNA-1  | NA | NA       |               | Os08g0224200 | OsR498G0815462800.01.T01 | YTH domain-containing family protein 1                           |
| maker-8-augustus-gene-8.12-mRNA-1   | NA | NA       |               | Os08g0114200 | OsR498G0815068300.01.T01 | Endoglucanase                                                    |
| maker-8-augustus-gene-8.19-mRNA-1   | NA | NA       |               | 0            | OsR498G0815065400.01.T04 | Major facilitator superfamily domain-containing protein 5        |
| maker-8-augustus-gene-8.26-mRNA-1   | NA | Japonica |               | Os08g0114300 | OsR498G0815068800.01.T01 | L-gulonolactone oxidase                                          |
| maker-8-augustus-gene-8.28-mRNA-1   | NA | NA       |               | Os08g0115200 | OsR498G0815070600.01.T01 | IQ-domain 17                                                     |
| maker-8-augustus-gene-8.9-mRNA-1    | NA | NA       |               | Os08g0114100 | OsR498G0815066500.01.T02 | Beta-carotene isomerase D27, chloroplastic                       |
| maker-8-augustus-gene-85.0-mRNA-1   | NA | NA       |               |              |                          | Ribosomal protein L7                                             |
| maker-8-augustus-gene-85.12-mRNA-1  | NA | NA       |               | 0            | OsR498G0815497600.01.T01 | AT hook motif-containing protein, putative, expressed            |
| maker-8-augustus-gene-86.3-mRNA-1   | NA | NA       |               | Os08g0237000 | OsR498G0815506900.01.T01 | Xyloglucan endotransglucosylase/hydrolase                        |
| maker-8-augustus-gene-87.11-mRNA-1  | NA | NA       |               |              |                          | Complex 1 family protein, putative, expressed                    |
| maker-8-augustus-gene-87.23-mRNA-1  | NA | NA       |               | 0            | OsR498G0407881700.01.T01 | Transposon protein, putative, Mutator sub-class, expressed       |
| maker-8-augustus-gene-87.6-mRNA-1   | NA | NA       |               | Os11g0275000 | OsR498G0815509300.01.T01 | Endo-1,31,4-beta-D-glucanase, putative, expressed                |
| maker-8-augustus-gene-88.38-mRNA-1  | NA | Indica   |               | Os08g0239100 | OsR498G0815510300.01.T01 | Endo-1,31,4-beta-D-glucanase, putative, expressed                |
| maker-8-augustus-gene-88.44-mRNA-1  | NA | NA       |               | Os08g0239300 | OsR498G0815510700.01.T01 | DLH domain-containing protein                                    |
| maker-8-augustus-gene-88.61-mRNA-1  | NA | Japonica |               | Os08g0240000 | OsR498G0815510900.01.T01 | Sulfotransferase                                                 |
| maker-8-augustus-gene-89.7-mRNA-1   | NA | Japonica |               | Os08g0241300 | OsR498G0409229200.01.T06 |                                                                  |
| maker-8-augustus-gene-9.15-mRNA-1   | NA | NA       |               | Os08g0116500 | OsR498G0815077300.01.T03 | Ribosomal protein P1                                             |
| maker-8-augustus-gene-9.18-mRNA-1   | NA | Indica   |               | Os08g0116400 | OsR498G0815076800.01.T01 | polyadenylate-binding protein-interacting protein 11 isoform X1  |
| maker-8-augustus-gene-91.0-mRNA-1   | NA | NA       |               | Os08g0243500 | OsR498G0815523900.01.T01 | NADPH--cytochrome P450 reductase                                 |
| maker-8-augustus-gene-91.13-mRNA-1  | NA | NA       |               | Os08g0243600 | OsR498G0815524400.01.T01 | (DL)-glycerol-3-phosphatase 2                                    |
| maker-8-augustus-gene-92.7-mRNA-1   | NA | Indica   |               | Os08g0245800 | OsR498G0815527800.01.T03 | NB-ARC domain-containing protein                                 |
| maker-8-augustus-gene-92.8-mRNA-1   | NA | NA       | CC-NBS        | 0            | OsR498G0815527800.01.T03 | Disease resistance protein RPP13                                 |
| maker-8-augustus-gene-94.29-mRNA-1  | NA | NA       |               | 0            | OsR498G0815541700.01.T02 | Cell wall integrity protein scw1                                 |
| maker-8-augustus-gene-94.36-mRNA-1  | NA | NA       | Kinase-TM     | Os08g0249100 | OsR498G0815539600.01.T01 | probable receptor-like serine/threonine-protein kinase At5g57670 |
| maker-8-augustus-gene-94.38-mRNA-1  | NA | Japonica |               | Os08g0249500 | OsR498G0204909000.01.T03 | DAGKa domain-containing protein (Fragment)                       |
| maker-8-augustus-gene-94.40-mRNA-1  | NA | Japonica |               | Os08g0249600 | OsR498G0815542000.01.T06 | Diacylglycerol kinase                                            |
| maker-8-augustus-gene-95.0-mRNA-1   | NA | NA       |               | Os08g0250700 | OsR498G0815547500.01.T02 | Thioredoxin domain-containing protein 9                          |
| maker-8-augustus-gene-95.10-mRNA-1  | NA | NA       |               | Os08g0250900 | OsR498G0815549800.01.T01 | Protein SUPPRESSOR OF like                                       |
| maker-8-augustus-gene-95.4-mRNA-1   | NA | NA       |               | Os03g0618300 | OsR498G0306569000.01.T01 | Naringenin,2-oxoglutarate 3-dioxygenase                          |
| maker-8-augustus-gene-95.8-mRNA-1   | NA | NA       |               | Os08g0250000 | OsR498G0100355100.01.T03 | Metallothionein-like protein type 3                              |
| maker-8-augustus-gene-96.0-mRNA-1   | NA | Indica   |               | Os08g0253800 | OsR498G0815556900.01.T02 | Cellulose-synthase-like C5                                       |
| maker-8-augustus-gene-96.3-mRNA-1   | NA | NA       |               | 0            | OsR498G0815558500.01.T01 | Nodulin-like domain-containing protein (Fragment)                |
| maker-8-augustus-gene-96.9-mRNA-1   | NA | NA       |               | Os03g0663800 | OsR498G0815557200.01.T01 | Globulin like protein                                            |
| maker-9-augustus-gene-100.42-mRNA-1 | NA | NA       |               | 0            | OsR498G0917167000.01.T01 | PGG domain-containing protein                                    |
| maker-9-augustus-gene-100.43-mRNA-1 | NA | NA       |               | 0            | OsR498G0917167000.01.T01 | Ankyrin repeat family protein-like                               |
| maker-9-augustus-gene-102.31-mRNA-1 | NA | NA       |               | 0            | OsR498G0917179000.01.T01 | ABC transporter domain containing protein,expressed              |
| maker-9-augustus-gene-104.0-mRNA-1  | NA | NA       | Kinase-TM     |              |                          | Senescence-induced receptor-like serine/threonine-protein kinase |
| maker-9-augustus-gene-104.2-mRNA-1  | NA | NA       |               | Os09g0353700 | OsR498G0917230700.01.T01 | Iron/ascorbate-dependent oxidoreductase-like                     |
| maker-9-augustus-gene-106.25-mRNA-1 | NA | NA       | Kinase-LRR-TM | Os09g0351700 |                          | Serine/threonine-specific receptor protein kinase-like           |
| maker-9-augustus-gene-107.12-mRNA-1 | NA | Japonica | Kinase-TM     | Os09g0349100 | OsR498G0917214100.01.T01 | Serine/threonine-specific receptor protein kinase-like           |
| maker-9-augustus-gene-107.2-mRNA-1  | NA | Indica   | Kinase-LRR-TM | Os09g0352000 | OsR498G0917216200.01.T01 | Serine/threonine-specific receptor protein kinase-like           |
| maker-9-augustus-gene-107.4-mRNA-1  | NA | Japonica | Kinase-LRR-TM | Os09g0349800 | OsR498G0917216200.01.T01 | Putative LRR receptor-like serine/threonine-protein kinase       |
| maker-9-augustus-gene-108.40-mRNA-1 | NA | NA       |               | Os09g0348800 |                          | Transposon protein, putative, CACTA, En/Spm sub-class, expressed |
| maker-9-augustus-gene-109.13-mRNA-1 | NA | NA       |               | Os09g0345700 | OsR498G0917205400.01.T02 | NADH kinase                                                      |
| maker-9-augustus-gene-109.16-mRNA-1 | NA | NA       |               | Os09g0346400 | OsR498G0917206100.01.T01 | Proton pump-interactor                                           |
| maker-9-augustus-gene-109.5-mRNA-1  | NA | NA       |               | Os09g0346700 | OsR498G0917208000.01.T02 | Retinol dehydrogenase 13                                         |
| maker-9-augustus-gene-109.7-mRNA-1  | NA | NA       |               | Os09g0346600 | OsR498G0917207600.01.T03 | Short-chain dehydrogenase TIC 32, chloroplastic                  |
| maker-9-augustus-gene-110.15-mRNA-1 | NA | NA       |               | Os09g0344400 | OsR498G0917200700.01.T01 | F-box domain-containing protein                                  |
| maker-9-augustus-gene-110.2-mRNA-1  | NA | Japonica |               | Os09g0344500 | OsR498G0917201600.01.T01 | O-methyltransferase ZRP4                                         |
| maker-9-augustus-gene-110.4-mRNA-1  | NA | NA       | Kinase-TM     |              |                          | L-type lectin-domain containing receptor kinase IX.1             |
| maker-9-augustus-gene-112.27-mRNA-1 | NA | NA       | Kinase-TM     | Os09g0339000 | OsR498G0917194500.01.T01 | L-type lectin-domain containing receptor kinase IX.1             |

|                                     |    |          |                  |              |                          |                                                                                           |
|-------------------------------------|----|----------|------------------|--------------|--------------------------|-------------------------------------------------------------------------------------------|
| maker-9-augustus-gene-113.29-mRNA-1 | NA | NA       |                  | Os02g0545300 |                          | Putative ATP synthase subunit                                                             |
| maker-9-augustus-gene-115.0-mRNA-1  | NA | NA       | Kinase-LRR-TM    | Os09g0355400 |                          | Senescence-induced receptor-like serine/threonine-protein kinase                          |
| maker-9-augustus-gene-115.2-mRNA-1  | NA | NA       | Kinase-TM        |              |                          | Serine/threonine-specific receptor protein kinase-like                                    |
| maker-9-augustus-gene-115.4-mRNA-1  | NA | NA       |                  | Os09g0334500 | OsR498G0917182100.01.T01 | WRKY transcription factor                                                                 |
| maker-9-augustus-gene-116.0-mRNA-1  | NA | Japonica | Kinase-TM        | Os09g0356200 | OsR498G0917236300.01.T05 | Putative LRR receptor-like serine/threonine-protein kinase                                |
| maker-9-augustus-gene-116.11-mRNA-1 | NA | NA       |                  | Os09g0357250 | OsR498G0305320000.01.T01 | Proteophosphoglycan ppg4                                                                  |
| maker-9-augustus-gene-117.0-mRNA-1  | NA | NA       | Kinase-LRR-TM    | Os09g0356800 | OsR498G0917239000.01.T02 | Putative LRR receptor-like serine/threonine-protein kinase                                |
| maker-9-augustus-gene-121.6-mRNA-1  | NA | Indica   |                  | Os09g0507300 | OsR498G0917260400.01.T01 | L-ascorbate oxidase                                                                       |
| maker-9-augustus-gene-122.0-mRNA-1  | NA | Indica   |                  | Os08g0407600 | OsR498G0917268500.01.T06 | FLZ-type domain-containing protein (Fragment)                                             |
| maker-9-augustus-gene-123.42-mRNA-1 | NA | NA       |                  | Os09g0368200 | OsR498G0917271000.01.T02 | Flavin containing polyamine oxidase                                                       |
| maker-9-augustus-gene-123.46-mRNA-1 | NA | NA       |                  | Os09g0368500 | OsR498G0917272200.01.T01 | Flavin containing polyamine oxidase                                                       |
| maker-9-augustus-gene-13.45-mRNA-1  | NA | NA       |                  |              |                          | PI-PLC X domain-containing protein                                                        |
| maker-9-augustus-gene-13.46-mRNA-1  | NA | NA       |                  | Os09g0115600 | OsR498G0916693000.01.T04 | PI-PLC X domain-containing protein                                                        |
| maker-9-augustus-gene-131.12-mRNA-1 | NA | NA       |                  |              |                          | BED-type domain-containing protein                                                        |
| maker-9-augustus-gene-133.43-mRNA-1 | NA | NA       |                  | Os09g0386400 | OsR498G0917341200.01.T02 | Enhanced ethylene response protein 5                                                      |
| maker-9-augustus-gene-135.31-mRNA-1 | NA | Japonica |                  | Os09g0389000 | OsR498G0917355600.01.T01 | Mannose-6-phosphate isomerase                                                             |
| maker-9-augustus-gene-137.19-mRNA-1 | NA | NA       |                  | Os09g0394100 | OsR498G0917375400.01.T03 | Malonyl-CoA decarboxylase mitochondrial                                                   |
| maker-9-augustus-gene-137.5-mRNA-1  | NA | NA       |                  | Os09g0392100 | OsR498G0917367700.01.T01 | Enhanced disease susceptibility 1                                                         |
| maker-9-augustus-gene-139.3-mRNA-1  | NA | NA       |                  | Os04g0316800 | OsR498G1018384200.01.T01 | Transposon protein, putative, unclassified                                                |
| maker-9-augustus-gene-139.4-mRNA-1  | NA | NA       |                  | Os09g0396300 | OsR498G0917388100.01.T05 | Pyrrrolidone-carboxylate peptidase                                                        |
| maker-9-augustus-gene-139.8-mRNA-1  | NA | Indica   |                  | Os09g0396900 | OsR498G0917389500.01.T01 | Vacuolar iron transporter like                                                            |
| maker-9-augustus-gene-14.31-mRNA-1  | NA | NA       |                  |              |                          | CBF domain-containing protein (Fragment)                                                  |
| maker-9-augustus-gene-14.36-mRNA-1  | NA | Indica   |                  | Os09g0116100 | OsR498G0916695200.01.T01 |                                                                                           |
| maker-9-augustus-gene-140.0-mRNA-1  | NA | NA       |                  | Os09g0397100 | OsR498G0917391500.01.T01 |                                                                                           |
| maker-9-augustus-gene-140.14-mRNA-1 | NA | NA       |                  | Os09g0397400 | OsR498G0917394200.01.T02 | Protein trichome birefringence-like protein 14                                            |
| maker-9-augustus-gene-140.2-mRNA-1  | NA | NA       |                  | Os09g0397200 | OsR498G0917391700.01.T01 |                                                                                           |
| maker-9-augustus-gene-140.5-mRNA-1  | NA | NA       |                  | Os09g0397300 | OsR498G0917393900.01.T03 | Trehalose-6-phosphate synthase13                                                          |
| maker-9-augustus-gene-140.8-mRNA-1  | NA | NA       |                  | Os09g0397900 | OsR498G0917394900.01.T04 | Cleavage and polyadenylation specificity factor subunit 3-II like                         |
| maker-9-augustus-gene-142.35-mRNA-1 | NA | NA       |                  | Os09g0401900 | OsR498G0917411900.01.T02 | ER lumen protein-retaining receptor                                                       |
| maker-9-augustus-gene-142.55-mRNA-1 | NA | NA       |                  | Os09g0401600 | OsR498G0917411600.01.T01 | Plant UBX domain-containing protein 2                                                     |
| maker-9-augustus-gene-143.22-mRNA-1 | NA | NA       |                  | 0            | OsR498G0917414800.01.T01 |                                                                                           |
| maker-9-augustus-gene-144.43-mRNA-1 | NA | NA       |                  | Os09g0407200 | OsR498G0917421300.01.T06 | Ubiquitin receptor RAD23                                                                  |
| maker-9-augustus-gene-144.53-mRNA-1 | NA | NA       |                  | Os09g0406100 | OsR498G0917419000.01.T01 |                                                                                           |
| maker-9-augustus-gene-144.63-mRNA-1 | NA | NA       |                  | Os09g0407900 | OsR498G0917423000.01.T01 | U4/U6.U5 tri-snRNP-associated protein 2-like                                              |
| maker-9-augustus-gene-145.29-mRNA-1 | NA | NA       |                  | 0            | OsR498G0917423100.01.T07 | Actin cytoskeleton-regulatory complex protein                                             |
| maker-9-augustus-gene-145.33-mRNA-1 | NA | NA       |                  | 0            | OsR498G0917425300.01.T01 | Putative BAH domain, Agenet-like domain, Agenet domain, plant type                        |
| maker-9-augustus-gene-145.36-mRNA-1 | NA | NA       |                  | Os09g0408500 |                          | Heavy metal-associated isoprenylated plant protein 7                                      |
| maker-9-augustus-gene-145.39-mRNA-1 | NA | NA       | Kinase-TM        | Os09g0408800 | OsR498G0917427900.01.T01 | Cysteine-rich receptor-like protein kinase 10                                             |
| maker-9-augustus-gene-145.41-mRNA-1 | NA | NA       |                  | Os09g0408600 | OsR498G0917427400.01.T01 | Dihydrolipoyllysine-residue acetyltransferase component of pyruvate dehydrogenase complex |
| maker-9-augustus-gene-146.0-mRNA-1  | NA | NA       |                  | 0            | OsR498G0917431500.01.T07 | Transcription initiation factor TFIID subunit 2                                           |
| maker-9-augustus-gene-15.0-mRNA-1   | NA | Indica   | LRR              | Os02g0826600 | OsR498G0916701600.01.T01 | Plant intracellular Ras-group-related LRR protein 6                                       |
| maker-9-augustus-gene-15.2-mRNA-1   | NA | NA       |                  | Os04g0274700 | OsR498G0613115000.01.T04 |                                                                                           |
| maker-9-augustus-gene-150.13-mRNA-1 | NA | NA       |                  | Os09g0417600 | OsR498G0917462400.01.T01 | WRKY transcription factor                                                                 |
| maker-9-augustus-gene-151.29-mRNA-1 | NA | NA       |                  | Os09g0417800 | OsR498G0917463600.01.T02 | WRKY transcription factor                                                                 |
| maker-9-augustus-gene-151.32-mRNA-1 | NA | NA       |                  | Os09g0419200 | OsR498G0917467800.01.T01 | Cinnamoyl CoA reductase                                                                   |
| maker-9-augustus-gene-152.0-mRNA-1  | NA | Indica   |                  | Os09g0419500 | OsR498G0917469500.01.T01 | E3 ubiquitin-protein ligase RNF144B                                                       |
| maker-9-augustus-gene-152.10-mRNA-1 | NA | NA       |                  | Os09g0420300 | OsR498G0917472200.01.T01 | probable GMP synthase [glutamine-hydrolyzing]                                             |
| maker-9-augustus-gene-152.2-mRNA-1  | NA | NA       |                  | Os09g0419600 | OsR498G0917469700.01.T01 | RBR-type E3 ubiquitin transferase                                                         |
| maker-9-augustus-gene-152.4-mRNA-1  | NA | Japonica |                  | Os09g0420000 | OsR498G0917471500.01.T01 | RBR-type E3 ubiquitin transferase                                                         |
| maker-9-augustus-gene-153.15-mRNA-1 | NA | NA       |                  |              |                          | kinesin-related protein 4                                                                 |
| maker-9-augustus-gene-154.29-mRNA-1 | NA | Japonica | CC-Kinase-LRR-TM | Os09g0423000 | OsR498G0917480300.01.T01 | putative leucine-rich repeat receptor-like serine/threonine-protein kinase A              |
| maker-9-augustus-gene-154.31-mRNA-1 | NA | NA       |                  | Os09g0423400 | OsR498G0917481100.01.T01 | Folate-biotin transporter like                                                            |
| maker-9-augustus-gene-154.33-mRNA-1 | NA | NA       |                  | Os09g0423500 | OsR498G0917482100.01.T01 | Peptidase A1 domain-containing protein (Fragment)                                         |
| maker-9-augustus-gene-156.14-mRNA-1 | NA | NA       |                  | Os09g0428300 |                          | Glutamate receptor                                                                        |
| maker-9-augustus-gene-16.0-mRNA-1   | NA | NA       |                  | Os09g0116100 | OsR498G0916695200.01.T01 |                                                                                           |
| maker-9-augustus-gene-16.2-mRNA-1   | NA | NA       |                  | Os09g0119100 | OsR498G0916707400.01.T01 | Ubiquitin system component Cue                                                            |
| maker-9-augustus-gene-164.14-mRNA-1 | NA | NA       |                  | Os09g0440300 | OsR498G0917542200.01.T01 | Aldehyde dehydrogenase 7B4                                                                |
| maker-9-augustus-gene-168.42-mRNA-1 | NA | NA       |                  | Os09g0448200 | OsR498G0917573900.01.T02 | Potassium transporter                                                                     |
| maker-9-augustus-gene-18.0-mRNA-1   | NA | NA       |                  | 0            | OsR498G0916715900.01.T07 | Similar to MIM (HYPERSENSITIVE TO MMS, IRRADIATION AND MMC)                               |
| maker-9-augustus-gene-18.5-mRNA-1   | NA | Indica   |                  | Os01g0214200 | OsR498G0916718700.01.T01 | Isoamyl acetate-hydrolyzing esterase                                                      |
| maker-9-augustus-gene-18.8-mRNA-1   | NA | NA       |                  | Os09g0122000 |                          | C2H2-type domain-containing protein                                                       |

|                                     |    |          |               |               |                          |                                                                     |
|-------------------------------------|----|----------|---------------|---------------|--------------------------|---------------------------------------------------------------------|
| maker-9-augustus-gene-183.4-mRNA-1  | NA | NA       |               | Os09g0476000  | OsR498G091767800.01.T01  | Movement protein binding protein 2C                                 |
| maker-9-augustus-gene-183.6-mRNA-1  | NA | NA       |               | 0             | OsR498G0917682900.01.T01 | titin homolog                                                       |
| maker-9-augustus-gene-184.26-mRNA-1 | NA | NA       |               | Os09g0477900  | OsR498G0917683500.01.T06 | Bacterial Fmu (Sun)/eukaryotic nucleolar NOL1/Nop2p                 |
| maker-9-augustus-gene-184.31-mRNA-1 | NA | NA       | Kinase        | Os09g0478500  | OsR498G0917686300.01.T03 | Serine/threonine-protein kinase D6PKL1                              |
| maker-9-augustus-gene-184.37-mRNA-1 | NA | Indica   | Kinase-LRR-TM | Os08g0493800  | OsR498G0917690700.01.T01 | Serine/threonine protein kinase                                     |
| maker-9-augustus-gene-184.41-mRNA-1 | NA | NA       |               | Os09g0478100  | OsR498G0917684000.01.T01 | Cellulose synthase-like protein E1                                  |
| maker-9-augustus-gene-184.46-mRNA-1 | NA | Indica   |               | Os09g0478100  | OsR498G0917684200.01.T01 | Cellulose synthase-like protein E6                                  |
| maker-9-augustus-gene-184.49-mRNA-1 | NA | NA       |               | Os09g0478400  | OsR498G0917685000.01.T04 |                                                                     |
| maker-9-augustus-gene-185.38-mRNA-1 | NA | NA       |               | Os09g0479400  | OsR498G0917691100.01.T01 | DUF2431 domain-containing protein (Fragment)                        |
| maker-9-augustus-gene-185.41-mRNA-1 | NA | Indica   |               | Os02g0198700  | OsR498G0917692300.01.T01 | Subtilisin-like protease                                            |
| maker-9-augustus-gene-185.54-mRNA-1 | NA | NA       | CC-NBS-TM     | Os09g0479500  | OsR498G0917691400.01.T01 | Disease resistance protein RPM1                                     |
| maker-9-augustus-gene-19.26-mRNA-1  | NA | NA       |               | Os09g0123100  | OsR498G0916721100.01.T01 | CCR4-NOT transcription complex subunit 10                           |
| maker-9-augustus-gene-19.30-mRNA-1  | NA | Indica   |               | Os09g0123200  | OsR498G0916721700.01.T03 | Flowering time control protein FCA                                  |
| maker-9-augustus-gene-190.41-mRNA-1 | NA | NA       |               |               |                          |                                                                     |
| maker-9-augustus-gene-194.8-mRNA-1  | NA | NA       |               | Os09g0500600  | OsR498G0917754700.01.T01 | DNA topoisomerase                                                   |
| maker-9-augustus-gene-20.40-mRNA-1  | NA | NA       | Kinase-TM     | Os09g0123300  | OsR498G0916722500.01.T02 | Putative leucine-rich repeat receptor-like protein kinase At4g00330 |
| maker-9-augustus-gene-20.49-mRNA-1  | NA | NA       |               | Os09g01233500 | OsR498G0916723200.01.T01 | Ankyrin repeat domain-containing protein 50                         |
| maker-9-augustus-gene-20.57-mRNA-1  | NA | NA       |               |               |                          | Ankyrin-like protein-like protein                                   |
| maker-9-augustus-gene-20.63-mRNA-1  | NA | NA       |               | 0             | OsR498G0916724600.01.T04 |                                                                     |
| maker-9-augustus-gene-200.52-mRNA-1 | NA | NA       |               |               |                          |                                                                     |
| maker-9-augustus-gene-201.52-mRNA-1 | NA | NA       |               | 0             | OsR498G0917792400.01.T02 |                                                                     |
| maker-9-augustus-gene-207.37-mRNA-1 | NA | NA       |               | Os09g0527100  | OsR498G0917832300.01.T01 | RRM domain-containing protein                                       |
| maker-9-augustus-gene-207.40-mRNA-1 | NA | NA       |               | Os09g0527500  | OsR498G0917832900.01.T01 | Nuclear speckle RNA-binding protein A                               |
| maker-9-augustus-gene-207.42-mRNA-1 | NA | NA       |               | Os09g0527600  | OsR498G0917833300.01.T01 | Ras-related protein RABA3                                           |
| maker-9-augustus-gene-207.49-mRNA-1 | NA | NA       |               | Os09g0526600  | OsR498G0917829800.01.T04 | Heat-responsive transcription factor                                |
| maker-9-augustus-gene-207.53-mRNA-1 | NA | NA       |               | Os09g0526700  | OsR498G0917831400.01.T01 | UDP-galactose 4-epimerase                                           |
| maker-9-augustus-gene-207.61-mRNA-1 | NA | NA       |               | Os09g0527700  | OsR498G0917833800.01.T01 | Auxin-responsive protein IAA26                                      |
| maker-9-augustus-gene-207.64-mRNA-1 | NA | NA       |               | Os09g0527900  | OsR498G0917834200.01.T01 | B-box zinc finger protein 19                                        |
| maker-9-augustus-gene-208.0-mRNA-1  | NA | NA       |               | Os09g0528000  | OsR498G0917834500.01.T01 | Kinesin-like protein KIN-7J                                         |
| maker-9-augustus-gene-208.8-mRNA-1  | NA | NA       |               | Os09g0528300  | OsR498G0917836200.01.T01 | Mediator of RNA polymerase II transcription subunit 10              |
| maker-9-augustus-gene-21.33-mRNA-1  | NA | NA       |               | 0             | OsR498G0916732700.01.T02 | Tetratricopeptide repeat protein-like                               |
| maker-9-augustus-gene-210.11-mRNA-1 | NA | NA       |               | Os09g0533300  | OsR498G0917853100.01.T02 | Inactive purple acid phosphatase                                    |
| maker-9-augustus-gene-210.13-mRNA-1 | NA | Indica   | Kinase-TM     | Os06g0654500  | OsR498G0917848400.01.T02 | Serine/threonine protein kinase                                     |
| maker-9-augustus-gene-210.15-mRNA-1 | NA | NA       |               | Os09g0531800  | OsR498G0917848800.01.T02 | Hexosyltransferase                                                  |
| maker-9-augustus-gene-210.19-mRNA-1 | NA | NA       |               | Os09g0531900  | OsR498G0917849000.01.T01 | Hexosyltransferase                                                  |
| maker-9-augustus-gene-210.31-mRNA-1 | NA | NA       |               | Os09g0532900  | OsR498G0917852800.01.T03 | MYB transcriptional factor                                          |
| maker-9-augustus-gene-210.33-mRNA-1 | NA | NA       |               |               |                          |                                                                     |
| maker-9-augustus-gene-210.34-mRNA-1 | NA | NA       | CC-NBS-TM     | Os09g0533400  | OsR498G0917853400.01.T01 | Lon protease homolog 2, peroxisomal                                 |
| maker-9-augustus-gene-210.4-mRNA-1  | NA | Indica   |               | Os09g0533100  | OsR498G0917852900.01.T03 | Pantothenate kinase                                                 |
| maker-9-augustus-gene-211.19-mRNA-1 | NA | NA       | Kinase        | Os09g0533600  | OsR498G0917854200.01.T01 | probable serine/threonine-protein kinase PBL19                      |
| maker-9-augustus-gene-211.7-mRNA-1  | NA | NA       |               |               |                          | Heat shock cognate protein 80                                       |
| maker-9-augustus-gene-212.63-mRNA-1 | NA | NA       |               | Os09g0536700  | OsR498G0917867600.01.T01 | Nodulin-like domain-containing protein (Fragment)                   |
| maker-9-augustus-gene-213.38-mRNA-1 | NA | NA       |               | Os09g0537600  | OsR498G0917870900.01.T01 | Peptidyl-prolyl cis-trans isomerase                                 |
| maker-9-augustus-gene-215.0-mRNA-1  | NA | NA       |               | 0             | OsR498G0917889100.01.T02 | DUF632 domain-containing protein/DUF630 domain-containing protein   |
| maker-9-augustus-gene-215.13-mRNA-1 | NA | NA       |               |               |                          | RING-type domain-containing protein (Fragment)                      |
| maker-9-augustus-gene-215.14-mRNA-1 | NA | NA       |               | 0             | OsR498G0917889800.01.T01 | Serine/threonine protein phosphatase 2A regulatory subunit          |
| maker-9-augustus-gene-216.0-mRNA-1  | NA | NA       | Kinase-TM     | Os09g0544300  | OsR498G0917897100.01.T01 | Serine/threonine-protein kinase STY46                               |
| maker-9-augustus-gene-216.11-mRNA-1 | NA | NA       |               | 0             | OsR498G0917898000.01.T01 | high mobility group B protein 9                                     |
| maker-9-augustus-gene-216.6-mRNA-1  | NA | Japonica |               | Os09g0544400  | OsR498G0917897500.01.T01 | Glutathione transferase                                             |
| maker-9-augustus-gene-217.6-mRNA-1  | NA | NA       |               | 0             | OsR498G0917904600.01.T02 | Auxin-responsive protein SAUR36                                     |
| maker-9-augustus-gene-217.8-mRNA-1  | NA | NA       |               | Os09g0547200  | OsR498G0917907000.01.T01 | Regulator of Vps4 activity in the MVB pathway protein               |
| maker-9-augustus-gene-22.4-mRNA-1   | NA | Indica   |               | Os09g0250800  | OsR498G0916734200.01.T01 | ABC transporter domain-containing protein (Fragment)                |
| maker-9-augustus-gene-223.56-mRNA-1 | NA | NA       |               |               |                          | Cyclic nucleotide-gated ion channel                                 |
| maker-9-augustus-gene-226.80-mRNA-1 | NA | NA       |               | Os09g0565100  |                          | KDEL-tailed cysteine endopeptidase CEP1                             |
| maker-9-augustus-gene-228.0-mRNA-1  | NA | NA       |               | Os09g0567300  | OsR498G0917967100.01.T03 | Monodehydroascorbate reductase                                      |
| maker-9-augustus-gene-230.63-mRNA-1 | NA | NA       |               | Os09g0536400  | OsR498G0917866300.01.T01 | Thaumatococcus-like protein 1b                                      |
| maker-9-augustus-gene-24.5-mRNA-1   | NA | NA       |               | Os09g0128600  | OsR498G0916742000.01.T04 | CMP/dCMP deaminase                                                  |
| maker-9-augustus-gene-25.38-mRNA-1  | NA | NA       |               | Os09g0129400  | OsR498G0916743100.01.T06 |                                                                     |
| maker-9-augustus-gene-25.43-mRNA-1  | NA | NA       |               |               |                          |                                                                     |
| maker-9-augustus-gene-29.37-mRNA-1  | NA | NA       |               | Os09g0134400  | OsR498G0916762900.01.T03 | PRA1 family protein H                                               |
| maker-9-augustus-gene-3.3-mRNA-1    | NA | NA       |               | Os09g0101200  |                          | Zinc finger BED domain-containing protein DAYSLEEPER                |

|                                    |    |          |            |              |                          |                                                                           |
|------------------------------------|----|----------|------------|--------------|--------------------------|---------------------------------------------------------------------------|
| maker-9-augustus-gene-31.0-mRNA-1  | NA | NA       |            | Os09g0258000 | OsR498G0916849000.01.T03 | Phosphatidylinositolphosphatidylcholine transfer protein sfh2             |
| maker-9-augustus-gene-33.31-mRNA-1 | NA | NA       |            | Os01g0838725 | OsR498G1018411500.01.T01 |                                                                           |
| maker-9-augustus-gene-34.21-mRNA-1 | NA | NA       |            |              |                          | GATA-4/5/6 transcription factor (Fragment)                                |
| maker-9-augustus-gene-35.12-mRNA-1 | NA | NA       |            | Os09g0241700 |                          | Ribosomal protein-like                                                    |
| maker-9-augustus-gene-35.3-mRNA-1  | NA | NA       |            |              |                          | STAS domain-containing protein                                            |
| maker-9-augustus-gene-39.3-mRNA-1  | NA | Japonica |            | Os09g0246200 | OsR498G0916804200.01.T01 | DNA-directed RNA polymerase                                               |
| maker-9-augustus-gene-42.5-mRNA-1  | NA | NA       |            | Os08g0459400 |                          | DDE Tnp4 domain-containing protein (Fragment)                             |
| maker-9-augustus-gene-43.0-mRNA-1  | NA | NA       |            | Os09g0250700 | OsR498G0916833700.01.T06 | protein ACTIVITY OF BC1 COMPLEX KINASE 7, chloroplastic                   |
| maker-9-augustus-gene-49.0-mRNA-1  | NA | Japonica |            | Os09g0258700 | OsR498G0916851500.01.T01 | Bidirectional sugar transporter SWEET                                     |
| maker-9-augustus-gene-49.4-mRNA-1  | NA | NA       |            | Os09g0258000 | OsR498G0916849000.01.T03 | Phosphatidylinositolphosphatidylcholine transfer protein sfh2             |
| maker-9-augustus-gene-50.47-mRNA-1 | NA | NA       |            | Os09g0258800 |                          | Bidirectional sugar transporter SWEET                                     |
| maker-9-augustus-gene-50.52-mRNA-1 | NA | NA       |            | 0            | OsR498G0407890700.01.T01 |                                                                           |
| maker-9-augustus-gene-50.55-mRNA-1 | NA | NA       |            | 0            | OsR498G0102498700.01.T01 |                                                                           |
| maker-9-augustus-gene-50.57-mRNA-1 | NA | NA       |            | Os09g0258800 |                          | Ulp1 protease family, C-terminal catalytic domain containing protein      |
| maker-9-augustus-gene-50.66-mRNA-1 | NA | NA       |            |              |                          | Far-red impaired response-like                                            |
| maker-9-augustus-gene-51.11-mRNA-1 | NA | Japonica |            | Os09g0262000 | OsR498G0916863300.01.T01 | Epimerase domain-containing protein (Fragment)                            |
| maker-9-augustus-gene-51.16-mRNA-1 | NA | NA       |            | Os09g0261100 | OsR498G0916858000.01.T01 | Ribosomal protein-like                                                    |
| maker-9-augustus-gene-51.17-mRNA-1 | NA | NA       |            | Os09g0261300 | OsR498G0916858600.01.T01 | Phosphoglycolate phosphatase                                              |
| maker-9-augustus-gene-51.2-mRNA-1  | NA | NA       |            | 0            | OsR498G0916860500.01.T03 |                                                                           |
| maker-9-augustus-gene-53.27-mRNA-1 | NA | Indica   |            | Os09g0262000 | OsR498G0916870200.01.T01 | Epimerase domain-containing protein (Fragment)                            |
| maker-9-augustus-gene-53.29-mRNA-1 | NA | NA       |            | Os09g0266000 |                          | Polyketide cyclase Snoal-like domain                                      |
| maker-9-augustus-gene-53.31-mRNA-1 | NA | Japonica |            | Os09g0264400 | OsR498G0916863800.01.T01 | Flavonoid 3'-monooxygenase                                                |
| maker-9-augustus-gene-54.0-mRNA-1  | NA | NA       |            | Os09g0266400 | OsR498G0916872700.01.T01 | Hydrolase acting on ester bonds                                           |
| maker-9-augustus-gene-54.12-mRNA-1 | NA | Indica   |            | Os09g0266600 | OsR498G0916873200.01.T02 | BTB/POZ domain-containing protein isoform X3                              |
| maker-9-augustus-gene-54.8-mRNA-1  | NA | NA       |            | 0            | OsR498G0916871400.01.T03 |                                                                           |
| maker-9-augustus-gene-55.0-mRNA-1  | NA | NA       |            | Os09g0267500 | OsR498G0916877300.01.T02 | Coatomer subunit alpha-2                                                  |
| maker-9-augustus-gene-55.12-mRNA-1 | NA | NA       |            |              |                          | RRM domain-containing protein                                             |
| maker-9-augustus-gene-55.8-mRNA-1  | NA | NA       | LRR-NBS-TM | 0            | OsR498G0916877900.01.T01 | Disease resistance protein RPM1                                           |
| maker-9-augustus-gene-61.0-mRNA-1  | NA | NA       |            |              |                          | VWA domain-containing protein                                             |
| maker-9-augustus-gene-62.50-mRNA-1 | NA | NA       | CC-Kinase  | 0            | OsR498G0916904200.01.T03 | Serine/threonine protein kinase                                           |
| maker-9-augustus-gene-63.2-mRNA-1  | NA | NA       |            | Os09g0279600 | OsR498G0916907100.01.T05 | DNA topoisomerase VI, B subunit                                           |
| maker-9-augustus-gene-68.0-mRNA-1  | NA | NA       |            | Os09g0286300 | OsR498G0916940800.01.T01 | Protein ENDOSPERM DEFECTIVE 1                                             |
| maker-9-augustus-gene-68.11-mRNA-1 | NA | NA       |            | Os09g0287000 | OsR498G0916944400.01.T02 | Submergence-1B                                                            |
| maker-9-augustus-gene-68.13-mRNA-1 | NA | NA       |            | Os09g0287300 | OsR498G0916948000.01.T03 | Histidine phosphatase                                                     |
| maker-9-augustus-gene-68.18-mRNA-1 | NA | NA       |            |              |                          |                                                                           |
| maker-9-augustus-gene-68.9-mRNA-1  | NA | NA       |            | Os09g0286400 | OsR498G0916941200.01.T03 | Sodium-hydrogen exchanger 5                                               |
| maker-9-augustus-gene-70.22-mRNA-1 | NA | NA       |            | Os04g0274700 | OsR498G0613115000.01.T04 |                                                                           |
| maker-9-augustus-gene-71.20-mRNA-1 | NA | NA       |            | 0            | OsR498G0916971100.01.T01 |                                                                           |
| maker-9-augustus-gene-71.22-mRNA-1 | NA | NA       |            | Os04g0316800 |                          | Transposon protein, putative, unclassified                                |
| maker-9-augustus-gene-71.23-mRNA-1 | NA | NA       |            | Os08g0514800 |                          | Ptta/En/Spm family plant transposase                                      |
| maker-9-augustus-gene-83.29-mRNA-1 | NA | NA       |            | 0            | OsR498G0917043300.01.T01 | Zinc finger CCCH domain-containing protein 47                             |
| maker-9-augustus-gene-84.12-mRNA-1 | NA | NA       |            |              |                          |                                                                           |
| maker-9-augustus-gene-84.13-mRNA-1 | NA | NA       |            | Os09g0306650 | OsR498G0917046000.01.T05 | Putative NAD(P)H dehydrogenase subunit CRR3 chloroplastic                 |
| maker-9-augustus-gene-84.26-mRNA-1 | NA | NA       |            | Os09g0306800 | OsR498G0917046800.01.T01 | Polycomb group protein EMBRYONIC FLOWER 2                                 |
| maker-9-augustus-gene-84.7-mRNA-1  | NA | NA       |            | Os09g0307300 | OsR498G0917047700.01.T03 | TPX2 domain-containing protein (Fragment)                                 |
| maker-9-augustus-gene-85.22-mRNA-1 | NA | NA       |            | Os09g0307800 | OsR498G0917051400.01.T03 | Histone-lysine N-methyltransferase, H3 lysine-36 and H4 lysine-20specific |
| maker-9-augustus-gene-86.10-mRNA-1 | NA | NA       |            | Os09g0309100 | OsR498G0917060600.01.T01 | SWIM-type domain-containing protein                                       |
| maker-9-augustus-gene-86.3-mRNA-1  | NA | NA       |            | Os09g0309200 | OsR498G0917061100.01.T02 | Calmodulin-binding protein 60 D like                                      |
| maker-9-augustus-gene-86.6-mRNA-1  | NA | NA       |            | Os09g0308900 | OsR498G0917060400.01.T03 | Lipid phosphate phosphatase 2                                             |
| maker-9-augustus-gene-87.0-mRNA-1  | NA | NA       | NBS-TM     |              |                          | NB-ARC domain-containing protein                                          |
| maker-9-augustus-gene-87.4-mRNA-1  | NA | NA       | CC-NBS-TM  | Os09g0313500 | OsR498G0917079600.01.T01 | Putative nucleotide-binding leucine-rich-repeat protein 1                 |
| maker-9-augustus-gene-88.25-mRNA-1 | NA | NA       | NBS-TM     |              |                          | NBS-LRR protein (Fragment)                                                |
| maker-9-augustus-gene-88.29-mRNA-1 | NA | NA       |            | Os09g0314300 | OsR498G0917083100.01.T01 | Peroxisome biogenesis protein 3-2                                         |
| maker-9-augustus-gene-88.34-mRNA-1 | NA | NA       |            | 0            | OsR498G0917084900.01.T02 | Polyadenylate-binding protein-interacting protein 9                       |
| maker-9-augustus-gene-88.42-mRNA-1 | NA | NA       | Kinase-TM  | Os09g0315600 |                          | L-type lectin-domain containing receptor kinase IV.2                      |
| maker-9-augustus-gene-88.44-mRNA-1 | NA | Indica   |            | Os08g0366000 | OsR498G0917090600.01.T01 | Phosphoenolpyruvate carboxylase                                           |
| maker-9-augustus-gene-88.47-mRNA-1 | NA | NA       |            | Os09g0315800 | OsR498G0917093200.01.T03 | Rab3 GTPase-activating protein non-catalytic subunit                      |
| maker-9-augustus-gene-88.51-mRNA-1 | NA | Indica   |            | Os04g0151900 | OsR498G0917094200.01.T02 | Cysteine dioxygenase                                                      |
| maker-9-augustus-gene-89.40-mRNA-1 | NA | NA       |            | 0            | OsR498G1119785600.01.T01 | Protein ACCELERATED CELL DEATH 6-like isoform X2                          |
| maker-9-augustus-gene-89.42-mRNA-1 | NA | Japonica |            | Os09g0317600 | OsR498G0917109300.01.T01 | Protein ACCELERATED CELL DEATH 6-like isoform X2                          |
| maker-9-augustus-gene-90.13-mRNA-1 | NA | NA       |            | Os09g0318600 | OsR498G0917118200.01.T02 | NAM-associated domain-containing protein                                  |

|                                    |    |          |            |              |                          |                                         |
|------------------------------------|----|----------|------------|--------------|--------------------------|-----------------------------------------|
| maker-9-augustus-gene-92.0-mRNA-1  | NA | Japonica |            | Os09g0319800 | OsR498G0407643700.01.T01 | (+)-delta-cadinene synthase             |
| maker-9-augustus-gene-98.23-mRNA-1 | NA | NA       |            |              |                          | Kinesin motor domain-containing protein |
| maker-9-augustus-gene-98.31-mRNA-1 | NA | NA       |            |              |                          | Kinesin motor domain-containing protein |
| maker-9-augustus-gene-99.0-mRNA-1  | NA | NA       | LRR-NBS-TM | Os09g0327800 |                          | NBS-LRR disease resistance protein-like |
| maker-9-augustus-gene-99.2-mRNA-1  | NA | NA       |            | Os01g0382900 |                          |                                         |
| maker-9-augustus-gene-99.4-mRNA-1  | NA | Japonica |            | Os09g0328600 | OsR498G0917164800.01.T01 |                                         |

OBIR1



iplastic



α-D-glucosidase

rotein

$\gamma$  protein

iplastic

e-phosphatase

ydrolase

omain-containing protein

te specific)



ase-like

tarin-3

drolase



e isoform 1

ta-D-glucosidase

ent)

family

IBUTION





:ontaining protein



α-D-glucosidase

/AAA domain

isoform 1

▫ isoform 1

complex

ein

ansferase, chloroplastic

drial



nily  
nily

I





3-LRK10L-2 family

isoform 3

ment)

complex

I

omain-containing protein



ein

1e-repeat region of PROPR

ted isoform 2

aminase domain-containing protein (Fragment)

main protein

pressed

otein

complex

:-phosphatase E1

complex



BC superfamily

TION 1

yl-undecaprenol N-acetylglucosamine transferase-like

n subfamily A

isoform 2

nsfer family protein

e

conserved site

onin Homology) domain

finger protein-related

oplastic



ein

Fragment)

domain

ng protein

iform X2

n epsilon

rm 2

n Homology domain

roxisomal protein PMP24

sed

e

oform 3



1a

ressed



e homolog|MCK1protein )



-phosphatase E1

ressed

ressed

onin Homology) domain

ein



»COCCUS

protein phosphatase PTEN-like

:rase-like

uperfamily protein

† isoform X1



complex

ssed

,

e equatorial

tic



ase-like isoform X2

se SPINDLY

}  
}

-RNP motifs) domain

|



erase



ein

domain







teaminase mitochondrial

IBUTION

⌘ adenylyltransferase Molybdopterin-synthase sulfurtransferase



stein, putative isoform 2

phosphate hydrolase

onin Homology) domain

:ssed  
:ssed  
e SEC

furE homolog, chloroplastic

lrial





itein

isoform X1

|

nily

oform 1



tein (Fragment)

rm X5

il

ase-like

iferase



e (Fragment)

aining protein

ein

isoform 1

: like

te specific)

gment)



; elegans ortholog dvc-1)

n-like

11

tic



βta-D-glucosidase

βta-D-glucosidase

▯ isoform X1

rase

-RNP motifs) domain

associated domain, HMA

ein

drolase  
isphate hydrolase

3C superfamily

r superfamily

domain-containing protein

subfamily A member 3-like



ent)

domain

ole-4-carboxamide isomerase, chloroplastic

:ein isoform 2

sed

$\gamma$  protein

uma

plastic

containing protein



rm X2

rm X1

re protein

:

complex



zyme



complex











1g SNF2 family

subfamily A member

↳phosphatase E1

tarin-3  
tarin-3

ein

n

complex





amilly protein

se SPINDLY

isoform 4

isferase, mitochondrial



otein

!2g24130



ata-D-glucosidase

ata-D-glucosidase



α-D-glucosidase  
α-D-glucosidase  
α-D-glucosidase

»plastic

te hydrolase

ymerase (Fragment)

isoform 1

imily protein

oform X2

n23 family protein





repeat domain, L

like

like

ng protein

ised



ised

elated



putative



tein, putative

/AAA domain







iplastic

n subfamily A

subfamily A-like protein 1





e

rotein

Fragment)

:ein isoform 1

e

BC superfamily



tein

rotein

Fragment)

ein isoform 1





3C superfamily



γ protein

se SPINDLY

domain

iform X2



rotein







-phosphatase E1

se

il

onin Homology) domain

e-phosphatase

ed

uperfamily protein

onin Homology) domain

isoform X1

tarin-3

1S protein)

subfamily A containing DEAD/H box 1

ase-like isoform X2



ressed

ic

ydrolase

subfamily A member 3-like

tarin-3

tein

ntaining protein

protein

se, SIK1/2

IBUTION

⇒ adenylyltransferase Molybdopterin-synthase sulfurtransferase

, HAD-like domain protein



ase-like

in

staining protein  
expressed

beta-D-glucosidase

staining protein

iferase

oform X1

ein, expressed

roxisomal protein PMP24

rotein  
ised

CTOR-like

tarin-3

uperfamily protein



rotein 1

β-D-glucosidase

β-D-glucosidase







iated domain  
n-containing protein

role-4-carboxamide isomerase, chloroplastic

main, putative

isoform 1



IBUTION

se, SIK1/2







aining protein

init

in-containing protein

n X1



tarin-3

in-containing protein

tein  
containing protein

se SPINDLY

rogenase complex

t2g24130
