# Supplementary material for: Development and Genome-Wide Analysis of a Blast-Resistant japonica Rice Variety
Source: MDPI journal article supplement (doi:10.3390/plants12203536), 2023-10-11
Supplement: s1 [file s1]

**Supplemental Table S3. Genes identified in the genome of COPSEMAR9. Only COPSEMAR9 genes for which homologues are identified in *japonica* (IRGSP-1.0) and *indica* (R498) are listed.**

| Marker                                          | Chromosome | Query | India_87 | India_91 | in India, eval | in India, Btore | Japanica_42  | in Japanica_42 | in Japanica, eval | in Japanica, Btore | Japanica_43 | in India, Btore | Assignment Gene | Assignment Genome | Bratidase Gene Class |
|-------------------------------------------------|------------|-------|----------|----------|----------------|-----------------|--------------|----------------|-------------------|--------------------|-------------|-----------------|-----------------|-------------------|----------------------|
| augustinus_masked1 processed gene 15.18 mBNA-1  | 1          | 1     | 0.00E+00 | 0.00E+00 | 1762           | 0.00E+00        | 0.01211900   | 82.50          | 0.00E+00          | 1125               | 861         | india           | india           | Japanica          |                      |
| augustinus_masked1 processed gene 15.23 mBNA-1  | 1          | 1     | 0.00E+00 | 0.00E+00 | 1457           | 0.00E+00        | 0.01243143   | 80.00          | 0.00E+00          | 1127               | 861         | india           | india           | Japanica          |                      |
| augustinus_masked1 processed gene 15.18 mBNA-1  | 1          | 1     | 0.00E+00 | 0.00E+00 | 1548           | 0.00E+00        | 0.01212070   | 100.00         | 0.00E+00          | 1137               | 0           | NA              | NA              | NA                |                      |
| augustinus_masked1 processed gene 130.17 mBNA-1 | 1          | 1     | 0.00E+00 | 0.00E+00 | 1427           | 0.00E+00        | 0.01211720   | 11.17          | 0.00E+00          | 1137               | 0           | india           | india           | Japanica          |                      |
| augustinus_masked1 processed gene 111.45 mBNA-1 | 1          | 1     | 0.00E+00 | 0.00E+00 | 6,416,137      | 488             | 0.01202970   | 100.00         | 0.00E+00          | 1143               | 485         | india           | india           | Japanica          |                      |
| augustinus_masked1 processed gene 112.19 mBNA-1 | 1          | 1     | 0.00E+00 | 0.00E+00 | 1,691,152      | 38              | 0.01205100   | 100.00         | 1.13E+15          | 1147               | 0           | NA              | NA              | Japanica          |                      |
| augustinus_masked1 processed gene 174.02 mBNA-1 | 1          | 1     | 0.00E+00 | 0.00E+00 | 1,171          | 0               | 0.01211130   | 100.00         | 0.00E+00          | 1147               | 0           | india           | india           | Japanica          |                      |
| augustinus_masked1 processed gene 12.2 mBNA-1   | 1          | 1     | 0.00E+00 | 0.00E+00 | 861            | 0.00E+00        | 0.01202100   | 100.00         | 4.14E+144         | 509                | 352         | india           | india           | NA                |                      |
| augustinus_masked1 processed gene 125.33 mBNA-1 | 1          | 1     | 0.00E+00 | 0.00E+00 | 2124           | 0.00E+00        | 0.01202900   | 81.80          | 0.00E+00          | 1208               | 864         | india           | india           | Japanica          |                      |
| augustinus_masked1 processed gene 125.33 mBNA-1 | 1          | 1     | 0.00E+00 | 0.00E+00 | 957            | 0.00E+00        | 0.01204540   | 81.19          | 1.82E+143         | 508                | 469         | india           | india           | Japanica          |                      |
| augustinus_masked1 processed gene 17.23 mBNA-1  | 1          | 1     | 0.00E+00 | 0.00E+00 | 1332           | 0.00E+00        | 0.01204317   | 100.00         | 0.00E+00          | 1207               | 0           | india           | india           | Japanica          |                      |
| augustinus_masked1 processed gene 13.35 mBNA-1  | 1          | 1     | 0.00E+00 | 0.00E+00 | 1364           | 0.00E+00        | 0.01212420   | 99.74          | 0.00E+00          | 1153               | 0           | NA              | NA              | NA                |                      |
| augustinus_masked1 processed gene 13.35 mBNA-1  | 1          | 1     | 0.00E+00 | 0.00E+00 | 2448           | 0.00E+00        | 0.01204300   | 100.00         | 0.00E+00          | 1153               | 0           | india           | india           | Japanica          |                      |
| augustinus_masked1 processed gene 13.35 mBNA-1  | 1          | 1     | 0.00E+00 | 0.00E+00 | 1,79E+129      | 629             | 0.01202500   | 100.00         | 1.93E+139         | 607                | 22          | NA              | NA              | Japanica          |                      |
| augustinus_masked1 processed gene 13.35 mBNA-1  | 1          | 1     | 0.00E+00 | 0.00E+00 | 1153           | 0.00E+00        | 0.01202290   | 100.00         | 0.00E+00          | 1050               | 103         | NA              | NA              | NA                |                      |
| augustinus_masked1 processed gene 136.15 mBNA-1 | 1          | 1     | 0.00E+00 | 0.00E+00 | 2,97E+140      | 460             | 0.01204313   | 100.00         | 0.00E+00          | 1050               | 103         | india           | india           | Japanica          |                      |
| augustinus_masked1 processed gene 136.15 mBNA-1 | 1          | 1     | 0.00E+00 | 0.00E+00 | 1885           | 0.00E+00        | 0.01204100   | 100.00         | 0.00E+00          | 1050               | 103         | india           | india           | Japanica          |                      |
| augustinus_masked1 processed gene 136.2 mBNA-1  | 1          | 1     | 0.00E+00 | 0.00E+00 | 1439           | 0.00E+00        | 0.01204870   | 96.55          | 2.11E+137         | 554                | 485         | india           | india           | Japanica          |                      |
| augustinus_masked1 processed gene 136.2 mBNA-1  | 1          | 1     | 0.00E+00 | 0.00E+00 | 1439           | 0.00E+00        | 0.01204870   | 96.55          | 2.11E+137         | 554                | 485         | india           | india           | Japanica          |                      |
| augustinus_masked1 processed gene 136.2 mBNA-1  | 1          | 1     | 0.00E+00 | 0.00E+00 | 2551           | 0.00E+00        | 0.01204310   | 99.95          | 0.00E+00          | 3958               | 1445        | india           | india           | Japanica          |                      |
| augustinus_masked1 processed gene 136.2 mBNA-1  | 1          | 1     | 0.00E+00 | 0.00E+00 | 2551           | 0.00E+00        | 0.01204310   | 99.95          | 0.00E+00          | 3958               | 1445        | india           | india           | Japanica          |                      |
| augustinus_masked1 processed gene 139.18 mBNA-1 | 1          | 1     | 0.00E+00 | 0.00E+00 | 2270           | 0.00E+00        | 0.01204280   | 100.00         | 0.00E+00          | 2679               | 807         | india           | india           | Japanica          |                      |
| augustinus_masked1 processed gene 139.18 mBNA-1 | 1          | 1     | 0.00E+00 | 0.00E+00 | 2270           | 0.00E+00        | 0.01204280   | 100.00         | 0.00E+00          | 2679               | 807         | india           | india           | Japanica          |                      |
| augustinus_masked1 processed gene 146.1 mBNA-1  | 1          | 1     | 0.00E+00 | 0.00E+00 | 1,123          | 125             | 0.0120       | 100.00         | 0.00E+00          | 2560               | 250         | india           | india           | Japanica          |                      |
| augustinus_masked1 processed gene 146.1 mBNA-1  | 1          | 1     | 0.00E+00 | 0.00E+00 | 205            | 33              | 0.0120       | 100.00         | 0.00E+00          | 2560               | 250         | india           | india           | Japanica          |                      |
| augustinus_masked1 processed gene 147.22 mBNA-1 | 1          | 1     | 0.00E+00 | 0.00E+00 | 5379           | 0.00E+00        | 0.01203990   | 100.00         | 0.00E+00          | 1729               | 1350        | india           | india           | Japanica          |                      |
| augustinus_masked1 processed gene 147.22 mBNA-1 | 1          | 1     | 0.00E+00 | 0.00E+00 | 5379           | 0.00E+00        | 0.01203990   | 100.00         | 0.00E+00          | 1729               | 1350        | india           | india           | Japanica          |                      |
| augustinus_masked1 processed gene 151.19 mBNA-1 | 1          | 1     | 0.00E+00 | 0.00E+00 | 1176           | 0.00E+00        | 0.01202830   | 99.85          | 0.00E+00          | 1176               | 0           | NA              | NA              | NA                |                      |
| augustinus_masked1 processed gene 151.19 mBNA-1 | 1          | 1     | 0.00E+00 | 0.00E+00 | 1176           | 0.00E+00        | 0.01202830   | 99.85          | 0.00E+00          | 1176               | 0           | NA              | NA              | NA                |                      |
| augustinus_masked1 processed gene 155.37 mBNA-1 | 1          | 1     | 0.00E+00 | 0.00E+00 | 2457           | 0.00E+00        | 0.01203790   | 100.00         | 0.00E+00          | 2040               | 417         | india           | india           | Japanica          |                      |
| augustinus_masked1 processed gene 155.37 mBNA-1 | 1          | 1     | 0.00E+00 | 0.00E+00 | 2457           | 0.00E+00        | 0.01203790   | 100.00         | 0.00E+00          | 2040               | 417         | india           | india           | Japanica          |                      |
| augustinus_masked1 processed gene 161.7 mBNA-1  | 1          | 1     | 0.00E+00 | 0.00E+00 | 948            | 0.00E+00        | 0.01203300   | 98.85          | 0.00E+00          | 925                | 27          | india           | india           | Japanica          |                      |
| augustinus_masked1 processed gene 161.7 mBNA-1  | 1          | 1     | 0.00E+00 | 0.00E+00 | 948            | 0.00E+00        | 0.01203300   | 98.85          | 0.00E+00          | 925                | 27          | india           | india           | Japanica          |                      |
| augustinus_masked1 processed gene 161.7 mBNA-1  | 1          | 1     | 0.00E+00 | 0.00E+00 | 851            | 0.00E+00        | 0.01203840   | 100.00         | 0.00E+00          | 930                | 59          | NA              | NA              | NA                |                      |
| augustinus_masked1 processed gene 161.7 mBNA-1  | 1          | 1     | 0.00E+00 | 0.00E+00 | 1332           | 0.00E+00        | 0.01204317   | 100.00         | 0.00E+00          | 930                | 59          | india           | india           | Japanica          |                      |
| augustinus_masked1 processed gene 178.1 mBNA-1  | 1          | 1     | 0.00E+00 | 0.00E+00 | 2892           | 0.00E+00        | 0.01204980   | 100.00         | 0.00E+00          | 2908               | 14          | NA              | NA              | Japanica          |                      |
| augustinus_masked1 processed gene 178.1 mBNA-1  | 1          | 1     | 0.00E+00 | 0.00E+00 | 2892           | 0.00E+00        | 0.01204980   | 100.00         | 0.00E+00          | 2908               | 14          | NA              | NA              | Japanica          |                      |
| augustinus_masked1 processed gene 183.15 mBNA-1 | 1          | 1     | 0.00E+00 | 0.00E+00 | 1,815          | 179             | 0.01204510   | 100.00         | 0.00E+00          | 2938               | 14          | india           | india           | Japanica          |                      |
| augustinus_masked1 processed gene 183.15 mBNA-1 | 1          | 1     | 0.00E+00 | 0.00E+00 | 1,815          | 179             | 0.01204510   | 100.00         | 0.00E+00          | 2938               | 14          | india           | india           | Japanica          |                      |
| augustinus_masked1 processed gene 187.31 mBNA-1 | 1          | 1     | 0.00E+00 | 0.00E+00 | 2432           | 0.00E+00        | 0.0120511000 | 100.00         | 0.00E+00          | 1443               | 13          | NA              | NA              | Japanica          |                      |
| augustinus_masked1 processed gene 187.31 mBNA-1 | 1          | 1     | 0.00E+00 | 0.00E+00 | 2432           | 0.00E+00        | 0.0120511000 | 100.00         | 0.00E+00          | 1443               | 13          | NA              | NA              | Japanica          |                      |
| augustinus_masked1 processed gene 187.31 mBNA-1 | 1          | 1     | 0.00E+00 | 0.00E+00 | 1764           | 0.00E+00        | 0.0120511000 | 92.27          | 0.00E+00          | 923                | 461         | india           | india           | Japanica          |                      |
| augustinus_masked1 processed gene 191.39 mBNA-1 | 1          | 1     | 0.00E+00 | 0.00E+00 | 2019           | 0.00E+00        | 0.0120511000 | 100.00         | 0.00E+00          | 1824               | 195         | india           | india           | Japanica          |                      |
| augustinus_masked1 processed gene 191.39 mBNA-1 | 1          | 1     | 0.00E+00 | 0.00E+00 | 2019           | 0.00E+00        | 0.0120511000 | 100.00         | 0.00E+00          | 1824               | 195         | india           | india           | Japanica          |                      |
| augustinus_masked1 processed gene 199.34 mBNA-1 | 1          | 1     | 0.00E+00 | 0.00E+00 | 1339           | 0.00E+00        | 0.0120523000 | 100.00         | 0.00E+00          | 1339               | 0           | NA              | NA              | NA                |                      |
| augustinus_masked1 processed gene 199.34 mBNA-1 | 1          | 1     | 0.00E+00 | 0.00E+00 | 1339           | 0.00E+00        | 0.0120523000 | 100.00         | 0.00E+00          | 1339               | 0           | NA              | NA              | NA                |                      |
| augustinus_masked1 processed gene 214.1 mBNA-1  | 1          | 1     | 0.00E+00 | 0.00E+00 | 3,05E+129      | 463             | 0.0120319900 | 99.81          | 1.07E+129         | 462                | 0           | NA              | NA              | NA                |                      |
| augustinus_masked1 processed gene 214.1 mBNA-1  | 1          | 1     | 0.00E+00 | 0.00E+00 | 3,05E+129      | 463             | 0.0120319900 | 99.81          | 1.07E+129         | 462                | 0           | NA              | NA              | NA                |                      |
| augustinus_masked1 processed gene 230.48 mBNA-1 | 1          | 1     | 0.00E+00 | 0.00E+00 | 2,71E+130      | 334             | 0.0120448000 | 100.00         | 0.00E+00          | 1775               | 1441        | india           | india           | Japanica          |                      |
| augustinus_masked1 processed gene 230.48 mBNA-1 | 1          | 1     | 0.00E+00 | 0.00E+00 | 2,71E+130      | 334             | 0.0120448000 | 100.00         | 0.00E+00          | 1775               | 1441        | india           | india           | Japanica          |                      |
| augustinus_masked1 processed gene 231.1 mBNA-1  | 1          | 1     | 0.00E+00 | 0.00E+00 | 234            | 0.00E+00        | 0.0120499000 | 91.29          | 0.00E+00          | 234                | 0           | NA              | NA              | NA                |                      |
| augustinus_masked1 processed gene 231.1 mBNA-1  | 1          | 1     | 0.00E+00 | 0.00E+00 | 234            | 0.00E+00        | 0.0120499000 | 91.29          | 0.00E+00          | 234                | 0           | NA              | NA              | NA                |                      |
| augustinus_masked1 processed gene 231.1 mBNA-1  | 1          | 1     | 0.00E+00 | 0.00E+00 | 234            | 0.00E+00        | 0.0120499000 | 91.29          | 0.00E+00          | 234                | 0           | NA              | NA              | NA                |                      |
| augustinus_masked1 processed gene 231.1 mBNA-1  | 1          | 1     | 0.00E+00 | 0.00E+00 | 234            | 0.00E+00        | 0.0120499000 | 91.29          | 0.00E+00          | 234                | 0           | NA              | NA              | NA                |                      |
| augustinus_masked1 processed gene 231.1 mBNA-1  | 1          | 1     | 0.00E+00 | 0.00E+00 | 2418           | 0.00E+00        | 0.0120564800 | 100.00         | 0.00E+00          | 2572               | 126         | india           | india           | Japanica          |                      |
| augustinus_masked1 processed gene 231.1 mBNA-1  | 1          | 1     | 0.00E+00 | 0.00E+00 | 2418           | 0.00E+00        | 0.0120564800 | 100.00         | 0.00E+00          | 2572               | 126         | india           | india           | Japanica          |                      |
| augustinus_masked1 processed gene 231.1 mBNA-1  | 1          | 1     | 0.00E+00 | 0.00E+00 | 2418           | 0.00E+00        | 0.0120564800 | 100.00         | 0.00E+00          | 2572               | 126         | india           | india           | Japanica          |                      |
| augustinus_masked1 processed gene 231.1 mBNA-1  | 1          | 1     | 0.00E+00 | 0.00E+00 | 2418           | 0.00E+00        | 0.0120564800 | 100.00         | 0.00E+00          | 2572               | 126         | india           | india           | Japanica          |                      |
| augustinus_masked1 processed gene 231.1 mBNA-1  | 1          | 1     | 0.00E+00 | 0.00E+00 | 2418           | 0.00E+00        | 0.0120564800 | 100.00         | 0.00E+00          | 2572               | 126         | india           | india           | Japanica          |                      |
| augustinus_masked1 processed gene 231.1 mBNA-1  | 1          | 1     | 0.00E+00 | 0.00E+00 | 2418           | 0.00E+00        | 0.0120564800 | 100.00         | 0.00E+00          | 2572               | 126         | india           | india           | Japanica          |                      |
| augustinus_masked1 processed gene 231.1 mBNA-1  | 1          | 1     | 0.00E+00 | 0.00E+00 | 2418           | 0.00E+00        | 0.0120564800 | 100.00         | 0.00E+00          | 2572               | 126         | india           | india           | Japanica          |                      |
| augustinus_masked1 processed gene 231.1 mBNA-1  | 1          | 1     | 0.00E+00 | 0.00E+00 | 2418           | 0.00E+00        | 0.0120564800 | 100.00         | 0.00E+00          | 2572               | 126         | india           | india           | Japanica          |                      |
| augustinus_masked1 processed gene 231.1 mBNA-1  | 1          | 1     | 0.00E+00 | 0.00E+00 | 2418           | 0.00E+00        | 0.0120564800 | 100.00         | 0.00E+00          | 2572               | 126         | india           | india           | Japanica          |                      |
| augustinus_masked1 processed gene 231.1 mBNA-1  | 1          | 1     | 0.00E+00 | 0.00E+00 | 2418           | 0.00E+00        | 0.0120564800 | 100.00         | 0.00E+00          | 2572               | 126         | india           | india           | Japanica          |                      |
| augustinus_masked1 processed gene 231.1 mBNA-1  | 1          | 1     | 0.00E+00 | 0.00E+00 | 2418           | 0.00E+00        | 0.0120564800 | 100.00         | 0.00E+00          | 2572               | 126         | india           | india           | Japanica          |                      |
| augustinus_masked1 processed gene 231.1 mBNA-1  | 1          | 1     | 0.00E+00 | 0.00E+00 | 2418           | 0.00E+00        | 0.0120564800 | 100.00         | 0.00E+00          | 2572               | 126         | india           | india           | Japanica          |                      |
| augustinus_masked1 processed gene 231.1 mBNA-1  | 1          | 1     | 0.00E+00 | 0.00E+00 | 2418           | 0.00E+00        | 0.0120564800 | 100.00         | 0.00E+00          | 2572               | 126         | india           | india           | Japanica          |                      |
| augustinus_masked1 processed gene 231.1 mBNA-1  | 1          | 1     | 0.00E+00 | 0.00E+00 | 2418           | 0.00E+00        | 0.0120564800 | 100.00         | 0.00E+00          | 2572               | 126         | india           | india           | Japanica          |                      |
| augustinus_masked1 processed gene 231.1 mBNA-1  | 1          | 1     | 0.00E+00 | 0.00E+00 | 2418           | 0.00E+00        | 0.0120564800 | 100.00         | 0.00E+00          | 2572               | 126         | india           | india           | Japanica          |                      |
| augustinus_masked1 processed gene 231.1 mBNA-1  | 1          | 1     | 0.00E+00 | 0.00E+00 | 2418           | 0.00E+00        | 0.0120564800 | 100.00         | 0.00E+00          | 2572               | 126         | india           | india           | Japanica          |                      |
| augustinus_masked1 processed gene 231.1 mBNA-1  | 1          | 1     | 0.00E+00 | 0.00E+00 | 2418           | 0.00E+00        | 0.0120564800 | 100.00         | 0.00E+00          | 2572               | 126         | india           | india           | Japanica          |                      |
| augustinus_masked1 processed gene 231.1 mBNA-1  | 1          | 1     | 0.00E+00 | 0.00E+00 | 2418           | 0.00E+00        | 0.0120564800 | 100.00         | 0.00E+00          | 2572               | 126         | india           | india           | Japanica          |                      |
| augustinus_masked1 processed gene 231.1 mBNA-1  | 1          | 1     | 0.00E+00 | 0.00E+00 | 2418           | 0.00E+00        | 0.0120564800 | 100.00         | 0.00E+00          | 2572               | 1           |                 |                 |                   |                      |

[illegible]

|                                 |   |                   |        |          |      |          |          |      |      |    |        |
|---------------------------------|---|-------------------|--------|----------|------|----------|----------|------|------|----|--------|
| augustin-1 processed 29-21 mN-1 | 1 | D4K490010194100.1 | 100.00 | 0.00E+00 | 1383 | 0.00E+00 | 0.00E+00 | 1221 | -42  | NA | indica |
| augustin-1 processed 29-24 mN-1 | 1 | D4K490010195100.1 | 97.47  | 0.00E+00 | 861  | 0.00E+00 | 0.00E+00 | 3706 | 154  | NA | indica |
| augustin-1 processed 29-25 mN-1 | 1 | D4K490010196100.1 | 99.3   | 0.00E+00 | 132  | 0.00E+00 | 0.00E+00 | 1295 | 0    | NA | indica |
| augustin-1 processed 29-26 mN-1 | 1 | D4K490010197100.1 | 98.78  | 0.00E+00 | 2236 | 0.00E+00 | 0.00E+00 | 1431 | 805  | NA | indica |
| augustin-1 processed 29-27 mN-1 | 1 | D4K490010198100.1 | 98.78  | 0.00E+00 | 1071 | 0.00E+00 | 0.00E+00 | 1397 | 96   | NA | indica |
| augustin-1 processed 29-29 mN-1 | 1 | D4K490010199100.1 | 98.78  | 0.00E+00 | 6084 | 0.00E+00 | 0.00E+00 | 1004 | 1004 | NA | indica |
| augustin-1 processed 29-30 mN-1 | 1 | D4K490010200100.1 | 98.78  | 0.00E+00 | 1071 | 0.00E+00 | 0.00E+00 | 1233 | 0    | NA | indica |
| augustin-1 processed 29-31 mN-1 | 1 | D4K490010201100.1 | 99.83  | 0.00E+00 | 2492 | 0.00E+00 | 0.00E+00 | 1796 | 756  | NA | indica |
| augustin-1 processed 29-32 mN-1 | 1 | D4K490010202100.1 | 99.83  | 0.00E+00 | 824  | 0.00E+00 | 0.00E+00 | 1363 | 1363 | NA | indica |
| augustin-1 processed 29-33 mN-1 | 1 | D4K490010203100.1 | 99.83  | 0.00E+00 | 2784 | 0.00E+00 | 0.00E+00 | 1276 | 488  | NA | indica |
| augustin-1 processed 29-34 mN-1 | 1 | D4K490010204100.1 | 99.83  | 0.00E+00 | 1071 | 0.00E+00 | 0.00E+00 | 1343 | 26   | NA | indica |
| augustin-1 processed 3-12 mN-1  | 1 | D4K490010100100.1 | 96.78  | 0.00E+00 | 1924 | 0.00E+00 | 0.00E+00 | 1402 | 128  | NA | indica |
| augustin-1 processed 3-13 mN-1  | 1 | D4K490010101100.1 | 96.78  | 0.00E+00 | 4261 | 0.00E+00 | 0.00E+00 | 1482 | 128  | NA | indica |
| augustin-1 processed 3-14 mN-1  | 1 | D4K490010102100.1 | 96.78  | 0.00E+00 | 1383 | 0.00E+00 | 0.00E+00 | 1295 | 0    | NA | indica |
| augustin-1 processed 3-15 mN-1  | 1 | D4K490010103100.1 | 96.78  | 0.00E+00 | 1383 | 0.00E+00 | 0.00E+00 | 1295 | 0    | NA | indica |
| augustin-1 processed 3-16 mN-1  | 1 | D4K490010104100.1 | 96.78  | 0.00E+00 | 1383 | 0.00E+00 | 0.00E+00 | 1295 | 0    | NA | indica |
| augustin-1 processed 3-17 mN-1  | 1 | D4K490010105100.1 | 96.78  | 0.00E+00 | 1383 | 0.00E+00 | 0.00E+00 | 1295 | 0    | NA | indica |
| augustin-1 processed 3-18 mN-1  | 1 | D4K490010106100.1 | 96.78  | 0.00E+00 | 1383 | 0.00E+00 | 0.00E+00 | 1295 | 0    | NA | indica |
| augustin-1 processed 3-19 mN-1  | 1 | D4K490010107100.1 | 96.78  | 0.00E+00 | 1383 | 0.00E+00 | 0.00E+00 | 1295 | 0    | NA | indica |
| augustin-1 processed 3-20 mN-1  | 1 | D4K490010108100.1 | 96.78  | 0.00E+00 | 1383 | 0.00E+00 | 0.00E+00 | 1295 | 0    | NA | indica |
| augustin-1 processed 3-21 mN-1  | 1 | D4K490010109100.1 | 96.78  | 0.00E+00 | 1383 | 0.00E+00 | 0.00E+00 | 1295 | 0    | NA | indica |
| augustin-1 processed 3-22 mN-1  | 1 | D4K490010110100.1 | 96.78  | 0.00E+00 | 1383 | 0.00E+00 | 0.00E+00 | 1295 | 0    | NA | indica |
| augustin-1 processed 3-23 mN-1  | 1 | D4K490010111100.1 | 96.78  | 0.00E+00 | 1383 | 0.00E+00 | 0.00E+00 | 1295 | 0    | NA | indica |
| augustin-1 processed 3-24 mN-1  | 1 | D4K490010112100.1 | 96.78  | 0.00E+00 | 1383 | 0.00E+00 | 0.00E+00 | 1295 | 0    | NA | indica |
| augustin-1 processed 3-25 mN-1  | 1 | D4K490010113100.1 | 96.78  | 0.00E+00 | 1383 | 0.00E+00 | 0.00E+00 | 1295 | 0    | NA | indica |
| augustin-1 processed 3-26 mN-1  | 1 | D4K490010114100.1 | 96.78  | 0.00E+00 | 1383 | 0.00E+00 | 0.00E+00 | 1295 | 0    | NA | indica |
| augustin-1 processed 3-27 mN-1  | 1 | D4K490010115100.1 | 96.78  | 0.00E+00 | 1383 | 0.00E+00 | 0.00E+00 | 1295 | 0    | NA | indica |
| augustin-1 processed 3-28 mN-1  | 1 | D4K490010116100.1 | 96.78  | 0.00E+00 | 1383 | 0.00E+00 | 0.00E+00 | 1295 | 0    | NA | indica |
| augustin-1 processed 3-29 mN-1  | 1 | D4K490010117100.1 | 96.78  | 0.00E+00 | 1383 | 0.00E+00 | 0.00E+00 | 1295 | 0    | NA | indica |
| augustin-1 processed 3-30 mN-1  | 1 | D4K490010118100.1 | 96.78  | 0.00E+00 | 1383 | 0.00E+00 | 0.00E+00 | 1295 | 0    |    |        |



[illegible]

[illegible]



[illegible]



[illegible]





[illegible]

[illegible]



|                                     |   |                          |        |          |      |             |       |          |      |    |    |         |
|-------------------------------------|---|--------------------------|--------|----------|------|-------------|-------|----------|------|----|----|---------|
| maker-1-augustin-gene 502.12-mRNA-1 | 1 | DNA489010010000.01.101   | 300.00 | 0.00E+00 | 991  | On16g063500 | 99.82 | 0.00E+00 | 986  | -5 | NA | Japonia |
| maker-1-augustin-gene 502.13-mRNA-1 | 1 | DNA48901001748000.01.101 | 93.55  | 0.00E+00 | 992  | On16g063300 | 99.73 | 0.00E+00 | 980  | -3 | NA | Japonia |
| maker-1-augustin-gene 502.14-mRNA-1 | 1 | DNA48901001748000.01.101 | 93.55  | 0.00E+00 | 993  | On16g063300 | 99.73 | 0.00E+00 | 980  | -3 | NA | Japonia |
| maker-1-augustin-gene 502.15-mRNA-1 | 1 | DNA48901001748000.01.101 | 93.52  | 0.00E+00 | 1001 | On16g064000 | 99.82 | 0.00E+00 | 1005 | -4 | NA | Japonia |
| maker-1-augustin-gene 502.16-mRNA-1 | 1 | DNA48901001748000.01.101 | 93.52  | 0.00E+00 | 999  | On16g064000 | 99.82 | 0.00E+00 | 999  | -3 | NA | Japonia |
| maker-1-augustin-gene 502.17-mRNA-1 | 1 | DNA48901001748000.01.101 | 93.52  | 0.00E+00 | 1000 | On16g064000 | 99.82 | 0.00E+00 | 1004 | -4 | NA | Japonia |
| maker-1-augustin-gene 502.18-mRNA-1 | 1 | DNA48901001748000.01.101 | 93.52  | 0.00E+00 | 1002 | On16g064000 | 99.82 | 0.00E+00 | 1006 | -4 | NA | Japonia |
| maker-1-augustin-gene 502.19-mRNA-1 | 1 | DNA48901001748000.01.101 | 93.52  | 0.00E+00 | 1003 | On16g064000 | 99.82 | 0.00E+00 | 1007 | -4 | NA | Japonia |
| maker-1-augustin-gene 502.20-mRNA-1 | 1 | DNA48901001748000.01.101 | 93.52  | 0.00E+00 | 1004 | On16g064000 | 99.82 | 0.00E+00 | 1008 | -4 | NA | Japonia |
| maker-1-augustin-gene 502.21-mRNA-1 | 1 | DNA48901001748000.01.101 | 93.52  | 0.00E+00 | 1005 | On16g064000 | 99.82 | 0.00E+00 | 1009 | -4 | NA | Japonia |
| maker-1-augustin-gene 502.22-mRNA-1 | 1 | DNA48901001748000.01.101 | 93.52  | 0.00E+00 | 1006 | On16g064000 | 99.82 | 0.00E+00 | 1010 | -4 | NA | Japonia |
| maker-1-augustin-gene 502.23-mRNA-1 | 1 | DNA48901001748000.01.101 | 93.52  | 0.00E+00 | 1007 | On16g064000 | 99.82 | 0.00E+00 | 1011 | -4 | NA | Japonia |
| maker-1-augustin-gene 502.24-mRNA-1 | 1 | DNA48901001748000.01.101 | 93.52  | 0.00E+00 | 1008 | On16g064000 | 99.82 | 0.00E+00 | 1012 | -4 | NA | Japonia |
| maker-1-augustin-gene 502.25-mRNA-1 | 1 | DNA48901001748000.01.101 | 93.52  | 0.00E+00 | 1009 | On16g064000 | 99.82 | 0.00E+00 | 1013 | -4 | NA | Japonia |
| maker-1-augustin-gene 502.26-mRNA-1 | 1 | DNA48901001748000.01.101 | 93.52  | 0.00E+00 | 1010 | On16g064000 | 99.82 | 0.00E+00 | 1014 | -4 | NA | Japonia |
| maker-1-augustin-gene 502.27-mRNA-1 | 1 | DNA48901001748000.01.101 | 93.52  | 0.00E+00 | 1011 | On16g064000 | 99.82 | 0.00E+00 | 1015 | -4 | NA | Japonia |
| maker-1-augustin-gene 502.28-mRNA-1 | 1 | DNA48901001748000.01.101 | 93.52  | 0.00E+00 | 1012 | On16g064000 | 99.82 | 0.00E+00 | 1016 | -4 | NA | Japonia |
| maker-1-augustin-gene 502.29-mRNA-1 | 1 | DNA48901001748000.01.101 | 93.52  | 0.00E+00 | 1013 | On16g064000 | 99.82 | 0.00E+00 | 1017 | -4 | NA | Japonia |
| maker-1-augustin-gene 502.30-mRNA-1 | 1 | DNA48901001748000.01.101 | 93.52  | 0.00E+00 | 1014 | On16g064000 | 99.82 | 0.00E+00 | 1018 | -4 | NA | Japonia |
| maker-1-augustin-gene 502.31-mRNA-1 | 1 | DNA48901001748000.01.101 | 93.52  | 0.00E+00 | 1015 | On16g064000 | 99.82 | 0.00E+00 | 1019 | -4 | NA | Japonia |
| maker-1-augustin-gene 502.32-mRNA-1 | 1 | DNA48901001748000.01.101 | 93.52  | 0.00E+00 | 1016 | On16g064000 | 99.82 | 0.00E+00 | 1020 | -4 | NA | Japonia |
| maker-1-augustin-gene 502.33-mRNA-1 | 1 | DNA48901001748000.01.101 | 93.52  | 0.00E+00 | 1017 | On16g064000 | 99.82 | 0.00E+00 | 1021 | -4 | NA | Japonia |
| maker-1-augustin-gene 502.34-mRNA-1 | 1 | DNA48901001748000.01.101 | 93.52  | 0.00E+00 | 1018 | On16g064000 | 99.82 | 0.00E+00 | 1022 | -4 | NA | Japonia |
| maker-1-augustin-gene 502.35-mRNA-1 | 1 | DNA48901001748000.01.101 | 93.52  | 0.00E+00 | 1019 | On16g064000 | 99.82 | 0.00E+00 | 1023 | -4 | NA | Japonia |
| maker-1-augustin-gene 502.36-mRNA-1 | 1 | DNA48901001748000.01.101 | 93.52  | 0.00E+00 | 1020 | On16g064000 | 99.82 | 0.00E+00 | 1024 | -4 | NA | Japonia |
| maker-1-augustin-gene 502.37-mRNA-1 | 1 | DNA48901001748000.01.101 | 93.52  | 0.00E+00 | 1021 | On16g064000 | 99.82 | 0.00E+00 |      |    |    |         |













[illegible]

|                                      |   |                          |       |          |      |              |        |           |      |     |       |           |
|--------------------------------------|---|--------------------------|-------|----------|------|--------------|--------|-----------|------|-----|-------|-----------|
| maker-2-augustus-gene-262.11.mRNA-1  | 2 | 0x648490024381.01.102    | 99.60 | 0.00E+00 | 1304 | 0x02g0454900 | 100.00 | 0.00E+00  | 1298 | 54  | NA    | Japonesia |
| maker-2-augustus-gene-262.15.mRNA-1  | 2 | 0x648490024383.01.102    | 99.72 | 0.00E+00 | 1924 | 0x02g0454900 | 100.00 | 0.00E+00  | 1298 | 54  | NA    | Japonesia |
| maker-2-augustus-gene-262.16.mRNA-1  | 2 | 0x648490024384.01.102    | 99.72 | 0.00E+00 | 1924 | 0x02g0454900 | 100.00 | 0.00E+00  | 1298 | 54  | NA    | Japonesia |
| maker-2-augustus-gene-262.16.mRNA-2  | 2 | 0x648490024384.01.101    | 99.60 | 0.00E+00 | 1304 | 0x02g0454900 | 100.00 | 0.00E+00  | 1298 | 54  | NA    | Japonesia |
| maker-2-augustus-gene-262.24.mRNA-1  | 2 | 0x648490024385.01.101    | 99.42 | 1.13E-17 | 656  | 0x02g035333  | 100.00 | 1.39E-133 | 468  | 148 | India | Japonesia |
| maker-2-augustus-gene-262.27.mRNA-1  | 2 | 0x64849002437900.01.101  | 99.29 | 0.00E+00 | 2996 | 0x02g0433066 | 99.33  | 0.00E+00  | 2646 | 350 | India | Japonesia |
| maker-2-augustus-gene-262.28.mRNA-1  | 2 | 0x64849002437901.01.101  | 99.32 | 0.00E+00 | 2996 | 0x02g0433066 | 99.33  | 0.00E+00  | 2646 | 350 | India | Japonesia |
| maker-2-augustus-gene-262.28.mRNA-2  | 2 | 0x64849002437901.01.102  | 99.32 | 0.00E+00 | 2996 | 0x02g0433066 | 99.33  | 0.00E+00  | 2646 | 350 | India | Japonesia |
| maker-2-augustus-gene-262.34.mRNA-1  | 2 | 0x648490024386.01.101    | 99.76 | 0.00E+00 | 2802 | 0x02g033460  | 100.00 | 0.00E+00  | 690  | 5   | NA    | NA        |
| maker-2-augustus-gene-262.37.mRNA-1  | 2 | 0x648490024387.01.101    | 99.80 | 0.00E+00 | 2802 | 0x02g033460  | 100.00 | 0.00E+00  | 690  | 5   | NA    | NA        |
| maker-2-augustus-gene-262.37.mRNA-2  | 2 | 0x648490024387.01.102    | 99.76 | 0.00E+00 | 2802 | 0x02g033460  | 100.00 | 0.00E+00  | 690  | 5   | NA    | NA        |
| maker-2-augustus-gene-262.37.mRNA-3  | 2 | 0x648490024384.01.01.101 | 99.76 | 0.00E+00 | 2802 | 0x02g033460  | 100.00 | 0.00E+00  | 690  | 5   | NA    | NA        |
| maker-2-augustus-gene-262.37.mRNA-4  | 2 | 0x648490024384.01.01.102 | 99.76 | 0.00E+00 | 2802 | 0x02g033460  | 100.00 | 0.00E+00  | 690  | 5   | NA    | NA        |
| maker-2-augustus-gene-262.37.mRNA-5  | 2 | 0x648490024384.01.01.103 | 99.76 | 0.00E+00 | 2802 | 0x02g033460  | 100.00 | 0.00E+00  | 690  | 5   | NA    | NA        |
| maker-2-augustus-gene-262.37.mRNA-6  | 2 | 0x648490024384.01.01.104 | 99.76 | 0.00E+00 | 2802 | 0x02g033460  | 100.00 | 0.00E+00  | 690  | 5   | NA    | NA        |
| maker-2-augustus-gene-262.37.mRNA-7  | 2 | 0x648490024384.01.01.105 | 99.76 | 0.00E+00 | 2802 | 0x02g033460  | 100.00 | 0.00E+00  | 690  | 5   | NA    | NA        |
| maker-2-augustus-gene-262.37.mRNA-8  | 2 | 0x648490024384.01.01.106 | 99.76 | 0.00E+00 | 2802 | 0x02g033460  | 100.00 | 0.00E+00  | 690  | 5   | NA    | NA        |
| maker-2-augustus-gene-262.37.mRNA-9  | 2 | 0x648490024384.01.01.107 | 99.76 | 0.00E+00 | 2802 | 0x02g033460  | 100.00 | 0.00E+00  | 690  | 5   | NA    | NA        |
| maker-2-augustus-gene-262.37.mRNA-10 | 2 | 0x648490024384.01.01.108 | 99.76 | 0.00E+00 | 2802 | 0x02g033460  | 100.00 | 0.00E+00  | 690  | 5   | NA    | NA        |
| maker-2-augustus-gene-262.37.mRNA-11 | 2 | 0x648490024384.01.01.109 | 99.76 | 0.00E+00 | 2802 | 0x02g033460  | 100.00 | 0.00E+00  | 690  | 5   | NA    | NA        |
| maker-2-augustus-gene-262.37.mRNA-12 | 2 | 0x648490024384.01.01.110 | 99.76 | 0.00E+00 | 2802 | 0x02g033460  | 100.00 | 0.00E+00  | 690  | 5   | NA    | NA        |
| maker-2-augustus-gene-262.37.mRNA-13 | 2 | 0x648490024384.01.01.111 | 99.76 | 0.00E+00 | 2802 | 0x02g033460  | 100.00 | 0.00E+00  | 690  | 5   | NA    | NA        |
| maker-2-augustus-gene-262.37.mRNA-14 | 2 | 0x648490024384.01.01.112 | 99.76 | 0.00E+00 | 2802 | 0x02g033460  | 100.00 | 0.00E+00  | 690  | 5   | NA    | NA        |
| maker-2-augustus-gene-262.37.mRNA-15 | 2 | 0x648490024384.01.01.113 | 99.76 | 0.00E+00 | 2802 | 0x02g033460  | 100.00 | 0.00E+00  | 690  | 5   | NA    | NA        |
| maker-2-augustus-gene-262.37.mRNA-16 | 2 | 0x648490024384.01.01.114 | 99.76 | 0.00E+00 | 2802 | 0x02g033460  | 100.00 | 0.00E+00  | 690  | 5   | NA    | NA        |
| maker-2-augustus-gene-262.37.mRNA-17 | 2 | 0x648490024384.01.01.11  |       |          |      |              |        |           |      |     |       |           |



|                                     |   |                     |       |          |      |          |        |          |      |     |          |    |
|-------------------------------------|---|---------------------|-------|----------|------|----------|--------|----------|------|-----|----------|----|
| maker-2-augustus-gene-340.43-mRNA-1 | 2 | DNA486004777.01.101 | 99.95 | 0.00E+00 | 1940 | 0.00E+00 | 100.00 | 0.00E+00 | 1993 | 32  | NA       | NA |
| maker-2-augustus-gene-340.43-mRNA-1 | 2 | DNA486004778.01.101 | 99.96 | 0.00E+00 | 1833 | 0.00E+00 | 100.00 | 0.00E+00 | 2063 | 429 | Japanica | NA |
| maker-2-augustus-gene-340.43-mRNA-1 | 2 | DNA486004779.01.101 | 99.97 | 0.00E+00 | 1898 | 0.00E+00 | 100.00 | 0.00E+00 | 2194 | 281 | Japanica | NA |
| maker-2-augustus-gene-340.43-mRNA-1 | 2 | DNA486004780.01.101 | 99.98 | 0.00E+00 | 1921 | 0.00E+00 | 100.00 | 0.00E+00 | 2337 | 36  | NA       | NA |
| maker-2-augustus-gene-340.43-mRNA-1 | 2 | DNA486004781.01.101 | 99.99 | 0.00E+00 | 1979 | 0.00E+00 | 100.00 | 0.00E+00 | 2507 | 49  | NA       | NA |
| maker-2-augustus-gene-341.1-mRNA-1  | 2 | DNA486004803.01.101 | 99.70 | 0.00E+00 | 1827 | 0.00E+00 | 100.00 | 0.00E+00 | 1689 | 14  | NA       | NA |
| maker-2-augustus-gene-341.1-mRNA-1  | 2 | DNA486004804.01.101 | 99.71 | 0.00E+00 | 2417 | 0.00E+00 | 100.00 | 0.00E+00 | 2630 | 13  | NA       | NA |
| maker-2-augustus-gene-341.1-mRNA-1  | 2 | DNA486004805.01.101 | 99.72 | 0.00E+00 | 2450 | 0.00E+00 | 100.00 | 0.00E+00 | 2834 | 3   | NA       | NA |
| maker-2-augustus-gene-341.1-mRNA-1  | 2 | DNA486004806.01.101 | 99.73 | 0.00E+00 | 2454 | 0.00E+00 | 100.00 | 0.00E+00 | 2834 | 0   | NA       | NA |
| maker-2-augustus-gene-341.1-mRNA-1  | 2 | DNA486004807.01.101 | 99.74 | 0.00E+00 | 2458 | 0.00E+00 | 100.00 | 0.00E+00 | 2834 | 0   | NA       | NA |
| maker-2-augustus-gene-341.1-mRNA-1  | 2 | DNA486004808.01.101 | 99.75 | 0.00E+00 | 2462 | 0.00E+00 | 100.00 | 0.00E+00 | 2834 | 0   | NA       | NA |
| maker-2-augustus-gene-341.1-mRNA-1  | 2 | DNA486004809.01.101 | 99.76 | 0.00E+00 | 2466 | 0.00E+00 | 100.00 | 0.00E+00 | 2834 | 0   | NA       | NA |
| maker-2-augustus-gene-341.1-mRNA-1  | 2 | DNA486004810.01.101 | 99.77 | 0.00E+00 | 2470 | 0.00E+00 | 100.00 | 0.00E+00 | 2834 | 0   | NA       | NA |
| maker-2-augustus-gene-341.1-mRNA-1  | 2 | DNA486004811.01.101 | 99.78 | 0.00E+00 | 2474 | 0.00E+00 | 100.00 | 0.00E+00 | 2834 | 0   | NA       | NA |
| maker-2-augustus-gene-341.1-mRNA-1  | 2 | DNA486004812.01.101 | 99.79 | 0.00E+00 | 2478 | 0.00E+00 | 100.00 | 0.00E+00 | 2834 | 0   | NA       | NA |
| maker-2-augustus-gene-341.1-mRNA-1  | 2 | DNA486004813.01.101 | 99.80 | 0.00E+00 | 2482 | 0.00E+00 | 100.00 | 0.00E+00 | 2834 | 0   | NA       | NA |
| maker-2-augustus-gene-341.1-mRNA-1  | 2 | DNA486004814.01.101 | 99.81 | 0.00E+00 | 2486 | 0.00E+00 | 100.00 | 0.00E+00 | 2834 | 0   | NA       | NA |
| maker-2-augustus-gene-341.1-mRNA-1  | 2 | DNA486004815.01.101 | 99.82 | 0.00E+00 | 2490 | 0.00E+00 | 100.00 | 0.00E+00 | 2834 | 0   | NA       | NA |
| maker-2-augustus-gene-341.1-mRNA-1  | 2 | DNA486004816.01.101 | 99.83 | 0.00E+00 | 2494 | 0.00E+00 | 100.00 | 0.00E+00 | 2834 | 0   | NA       | NA |
| maker-2-augustus-gene-341.1-mRNA-1  | 2 | DNA486004817.01.101 | 99.84 | 0.00E+00 | 2498 | 0.00E+00 | 100.00 | 0.00E+00 | 2834 | 0   | NA       | NA |
| maker-2-augustus-gene-341.1-mRNA-1  | 2 | DNA486004818.01.101 | 99.85 | 0.00E+00 | 2502 | 0.00E+00 | 100.00 | 0.00E+00 | 2834 | 0   | NA       | NA |
| maker-2-augustus-gene-341.1-mRNA-1  | 2 | DNA486004819.01.101 | 99.86 | 0.00E+00 | 2506 | 0.00E+00 | 100.00 | 0.00E+00 | 2834 | 0   | NA       | NA |
| maker-2-augustus-gene-341.1-mRNA-1  | 2 | DNA486004820.01.101 | 99.87 | 0.00E+00 | 2510 | 0.00E+00 | 100.00 | 0.00E+00 | 2834 | 0   | NA       | NA |
| maker-2-augustus-gene-341.1-mRNA-1  | 2 | DNA486004821.01.101 | 99.88 | 0.00E+00 | 2514 | 0.00E+00 | 100.00 | 0.00E+00 | 2834 | 0   | NA       | NA |
| maker-2-augustus-gene-341.1-mRNA-1  | 2 | DNA486004822.01.101 | 99.89 | 0.00E+00 | 2518 | 0.00E+00 | 100.00 | 0.00E+00 | 2834 | 0   | NA       | NA |
| maker-2-augustus-gene-341.1-mRNA-1  | 2 | DNA486004823.01.101 | 99.90 | 0.00E+00 | 2522 | 0.00E+00 | 100.00 | 0.00E+00 | 2834 | 0   | NA       | NA |
| maker-2-augustus-gene-341.1-mRNA-1  | 2 | DNA486004824.01.101 | 99.91 | 0.00E+00 | 2526 | 0.00E+00 | 100.00 | 0.00E+00 | 2834 | 0   | NA       | NA |



|                                     |   |                       |       |          |      |              |        |          |      |     |    |          |           |
|-------------------------------------|---|-----------------------|-------|----------|------|--------------|--------|----------|------|-----|----|----------|-----------|
| maker-2-augustus-gene-380.03.mRNA-1 | 2 | 0x48496000947A.01.T01 | 98.73 | 0.00E+00 | 1891 | 0x02a0060700 | 100.00 | 0.00E+00 | 1545 | 27  | NA | Japanica |           |
| maker-2-augustus-gene-380.04.mRNA-1 | 2 | 0x48496000947B.01.T01 | 98.53 | 0.00E+00 | 1111 | 0x02a0070000 | 99.89  | 0.00E+00 | 3918 | 54  | NA | Japanica | Kinase TM |
| maker-2-augustus-gene-380.05.mRNA-1 | 2 | 0x48496000947C.01.T01 | 98.53 | 0.00E+00 | 1111 | 0x02a0070000 | 99.89  | 0.00E+00 | 3918 | 54  | NA | Japanica |           |
| maker-2-augustus-gene-381.04.mRNA-1 | 2 | 0x48496000947D.01.T01 | 97.16 | 0.00E+00 | 1992 | 0x02a0011200 | 82.31  | 0.00E+00 | 1687 | 102 | NA | Japanica |           |
| maker-2-augustus-gene-381.05.mRNA-1 | 2 | 0x48496000947E.01.T01 | 97.16 | 0.00E+00 | 2091 | 0x02a0011200 | 82.31  | 0.00E+00 | 1687 | 102 | NA | Japanica |           |
| maker-2-augustus-gene-381.06.mRNA-1 | 2 | 0x48496000947F.01.T01 | 97.16 | 0.00E+00 | 2091 | 0x02a0011200 | 82.31  | 0.00E+00 | 1687 | 102 | NA | Japanica |           |
| maker-2-augustus-gene-382.04.mRNA-1 | 2 | 0x484960009480.01.T01 | 99.67 | 0.00E+00 | 1888 | 0x02a0009100 | 100.00 | 0.00E+00 | 1597 | 7   | NA | Japanica |           |
| maker-2-augustus-gene-382.05.mRNA-1 | 2 | 0x484960009481.01.T01 | 99.72 | 0.00E+00 | 1888 | 0x02a0009100 | 100.00 | 0.00E+00 | 1597 | 7   | NA | Japanica |           |
| maker-2-augustus-gene-382.06.mRNA-1 | 2 | 0x484960009482.01.T01 | 99.72 | 0.00E+00 | 1888 | 0x02a0009100 | 100.00 | 0.00E+00 | 1597 | 7   | NA | Japanica |           |
| maker-2-augustus-gene-382.07.mRNA-1 | 2 | 0x484960009483.01.T01 | 99.67 | 0.00E+00 | 1372 | 0x02a0010100 | 100.00 | 0.00E+00 | 1586 | 4   | NA | Japanica |           |
| maker-2-augustus-gene-382.08.mRNA-1 | 2 | 0x484960009484.01.T01 | 99.67 | 0.00E+00 | 1372 | 0x02a0010100 | 100.00 | 0.00E+00 | 1586 | 4   | NA | Japanica |           |
| maker-2-augustus-gene-382.09.mRNA-1 | 2 | 0x484960009485.01.T01 | 99.67 | 0.00E+00 | 1372 | 0x02a0010100 | 100.00 | 0.00E+00 | 1586 | 4   | NA | Japanica |           |
| maker-2-augustus-gene-382.10.mRNA-1 | 2 | 0x484960009486.01.T01 | 99.67 | 0.00E+00 | 1372 | 0x02a0010100 | 100.00 | 0.00E+00 | 1586 | 4   | NA | Japanica |           |
| maker-2-augustus-gene-382.11.mRNA-1 | 2 | 0x484960009487.01.T01 | 99.67 | 0.00E+00 | 1372 | 0x02a0010100 | 100.00 | 0.00E+00 | 1586 | 4   | NA | Japanica |           |
| maker-2-augustus-gene-382.12.mRNA-1 | 2 | 0x484960009488.01.T01 | 99.67 | 0.00E+00 | 1372 | 0x02a0010100 | 100.00 | 0.00E+00 | 1586 | 4   | NA | Japanica |           |
| maker-2-augustus-gene-382.13.mRNA-1 | 2 | 0x484960009489.01.T01 | 99.67 | 0.00E+00 | 1372 | 0x02a0010100 | 100.00 | 0.00E+00 | 1586 | 4   | NA | Japanica |           |
| maker-2-augustus-gene-382.14.mRNA-1 | 2 | 0x484960009490.01.T01 | 99.67 | 0.00E+00 | 1372 | 0x02a0010100 | 100.00 | 0.00E+00 | 1586 | 4   | NA | Japanica |           |
| maker-2-augustus-gene-382.15.mRNA-1 | 2 | 0x484960009491.01.T01 | 99.67 | 0.00E+00 | 1372 | 0x02a0010100 | 100.00 | 0.00E+00 | 1586 | 4   | NA | Japanica |           |
| maker-2-augustus-gene-382.16.mRNA-1 | 2 | 0x484960009492.01.T01 | 99.67 | 0.00E+00 | 1372 | 0x02a0010100 | 100.00 | 0.00E+00 | 1586 | 4   | NA | Japanica |           |
| maker-2-augustus-gene-382.17.mRNA-1 | 2 | 0x484960009493.01.T01 | 99.67 | 0.00E+00 | 1372 | 0x02a0010100 | 100.00 | 0.00E+00 | 1586 | 4   | NA | Japanica |           |
| maker-2-augustus-gene-382.18.mRNA-1 | 2 | 0x484960009494.01.T01 | 99.67 | 0.00E+00 | 1372 | 0x02a0010100 | 100.00 | 0.00E+00 | 1586 | 4   | NA | Japanica |           |
| maker-2-augustus-gene-382.19.mRNA-1 | 2 | 0x484960009495.01.T01 | 99.67 | 0.00E+00 | 1372 | 0x02a0010100 | 100.00 | 0.00E+00 | 1586 | 4   | NA | Japanica |           |
| maker-2-augustus-gene-382.20.mRNA-1 | 2 | 0x484960009496.01.T01 | 99.67 | 0.00E+00 | 1372 | 0x02a0010100 | 100.00 | 0.00E+00 | 1586 | 4   | NA | Japanica |           |
| maker-2-augustus-gene-382.21.mRNA-1 | 2 | 0x484960009497.01.T01 | 99.67 | 0.00E+00 | 1372 | 0x02a0010100 | 100.00 | 0.00E+00 | 1586 | 4   | NA | Japanica |           |
| maker-2-augustus-gene-382.22.mRNA-1 | 2 | 0x484960009498.01.T01 | 99.67 | 0.00E+00 | 1372 | 0x02a0010100 | 100.00 | 0.00E+00 | 1586 | 4   | NA |          |           |

[illegible]

[illegible]

[illegible]

|                                                  |   |                        |        |          |      |              |        |          |      |      |          |          |
|--------------------------------------------------|---|------------------------|--------|----------|------|--------------|--------|----------|------|------|----------|----------|
| agustina, marked 3 processed gene-482.11-mRNA-1  | 3 | DkR49803707384.001.104 | 99.81  | 0.00E+00 | 2665 | Ccag20683000 | 100.00 | 0.00E+00 | 2879 | 14   | NA       | japontia |
| agustina, marked 3 processed gene-482.15-mRNA-1  | 3 | DkR498037384.001.104   | 100.00 | 0.00E+00 | 756  | Ccag20683000 | 100.00 | 0.00E+00 | 756  | 0    | NA       | japontia |
| agustina, marked 3 processed gene-482.16-mRNA-1  | 3 | DkR498037384.001.104   | 100.00 | 0.00E+00 | 1190 | Ccag20683000 | 100.00 | 0.00E+00 | 1190 | 0    | NA       | japontia |
| agustina, marked 3 processed gene-483.03-mRNA-1  | 3 | DkR498037091.001.101   | 99.92  | 0.00E+00 | 2141 | Ccag20681100 | 100.00 | 0.00E+00 | 1363 | 22   | NA       | japontia |
| agustina, marked 3 processed gene-483.15-mRNA-1  | 3 | DkR498037297.001.101   | 96.89  | 0.00E+00 | 2190 | Ccag20684400 | 100.00 | 0.00E+00 | 2549 | 259  | japontia | japontia |
| agustina, marked 3 processed gene-483.24-mRNA-1  | 3 | DkR498037297.001.101   | 99.79  | 0.00E+00 | 871  | Ccag20681100 | 100.00 | 0.00E+00 | 439  | 133  | indica   | indica   |
| agustina, marked 3 processed gene-484.11-mRNA-1  | 3 | DkR498037297.001.101   | 99.85  | 0.00E+00 | 1165 | Ccag20681100 | 100.00 | 0.00E+00 | 1169 | 4    | NA       | japontia |
| agustina, marked 3 processed gene-484.23-mRNA-1  | 3 | DkR498037297.001.101   | 99.73  | 0.00E+00 | 1165 | Ccag20681100 | 100.00 | 0.00E+00 | 1169 | 4    | NA       | japontia |
| agustina, marked 3 processed gene-484.44-mRNA-1  | 3 | DkR498037305.400.101   | 97.03  | 0.00E+00 | 3022 | Ccag20682400 | 99.14  | 0.00E+00 | 3031 | 9    | NA       | japontia |
| agustina, marked 3 processed gene-485.11-mRNA-1  | 3 | DkR498037305.400.101   | 99.79  | 0.00E+00 | 3022 | Ccag20682400 | 99.14  | 0.00E+00 | 3031 | 9    | NA       | japontia |
| agustina, marked 3 processed gene-485.29-mRNA-1  | 3 | DkR498037312.001.101   | 96.76  | 0.00E+00 | 847  | Ccag20681900 | 100.00 | 0.00E+00 | 888  | 41   | NA       | japontia |
| agustina, marked 3 processed gene-485.48-mRNA-1  | 3 | DkR498037312.001.101   | 100.00 | 0.00E+00 | 834  | Ccag20681900 | 100.00 | 0.00E+00 | 834  | 0    | NA       | japontia |
| agustina, marked 3 processed gene-486.11-mRNA-1  | 3 | DkR498037312.001.101   | 99.88  | 0.00E+00 | 4325 | Ccag20681900 | 100.00 | 0.00E+00 | 4344 | 19   | indica   | indica   |
| agustina, marked 3 processed gene-486.32-mRNA-1  | 3 | DkR498037343.001.101   | 96.95  | 0.00E+00 | 2567 | Ccag20684500 | 100.00 | 0.00E+00 | 3728 | 1161 | japontia | NA       |
| agustina, marked 3 processed gene-490.101-mRNA-1 | 3 | DkR498037313.001.101   | 99.78  | 0.00E+00 | 2567 | Ccag20684500 | 100.00 | 0.00E+00 | 3728 | 1161 | japontia | NA       |
| agustina, marked 3 processed gene-494.5-mRNA-1   | 3 | DkR498037314.001.101   | 99.78  | 0.00E+00 | 2489 | Ccag20684500 | 100.00 | 0.00E+00 | 2500 | 13   | NA       | japontia |
| agustina, marked 3 processed gene-494.6-mRNA-1   | 3 | DkR498037314.001.101   | 99.78  | 0.00E+00 | 2489 | Ccag20684500 | 100.00 | 0.00E+00 | 2500 | 13   | NA       | japontia |
| agustina, marked 3 processed gene-494.15-mRNA-1  | 3 | DkR498037314.001.101   | 99.78  | 0.00E+00 | 2489 | Ccag20684500 | 100.00 | 0.00E+00 | 2500 | 13   | NA       | japontia |
| agustina, marked 3 processed gene-494.38-mRNA-1  | 3 | DkR498037314.001.101   | 99.78  | 0.00E+00 | 2489 | Ccag20684500 | 100.00 | 0.00E+00 | 2500 | 13   | NA       | japontia |
| agustina, marked 3 processed gene-494.41-mRNA-1  | 3 | DkR498037314.001.101   | 99.78  | 0.00E+00 | 2489 | Ccag20684500 | 100.00 | 0.00E+00 | 2500 | 13   | NA       | japontia |
| agustina, marked 3 processed gene-494.41-mRNA-1  | 3 | DkR498037314.001.101   | 99.78  | 0.00E+00 | 2489 | Ccag20684500 | 100.00 | 0.00E+00 | 2500 | 13   | NA       | japontia |
| agustina, marked 3 processed gene-494.41-mRNA-1  | 3 | DkR498037314.001.101   | 99.78  | 0.00E+00 | 2489 | Ccag20684500 | 100.00 | 0.00E+00 | 2500 | 13   | NA       | japontia |
| agustina, marked 3 processed gene-494.41-mRNA-1  | 3 | DkR498037314.001.101   | 99.78  | 0.00E+00 | 2489 | Ccag20684500 | 100.00 | 0.00E+00 | 2500 | 13   | NA       | japontia |
| agustina, marked 3 processed gene-494.41-mRNA-1  | 3 | DkR498037314.001.101   | 99.78  | 0.00E+00 | 2489 | Ccag20684500 | 100.00 | 0.00E+00 | 2500 | 13   | NA       | japontia |
| agustina, marked 3 processed gene-494.41-mRNA-1  | 3 | DkR498037314.001.101   | 99.78  | 0.00E+00 | 2489 | Ccag20684500 | 100.00 | 0.00E+00 | 2500 | 13   | NA       | japontia |
| agustina, marked 3 processed gene-494.41-mRNA-1  | 3 | DkR498037314.001.101   | 99.78  | 0.00E+00 | 2489 | Ccag206845   |        |          |      |      |          |          |

|                                       |   |                      |       |          |      |            |        |          |      |   |     |          |          |
|---------------------------------------|---|----------------------|-------|----------|------|------------|--------|----------|------|---|-----|----------|----------|
| mukherjee-augustin gene-107-48-mRNA-1 | 3 | DNAERR0009792.01.T61 | 88.95 | 0.00E+00 | 1366 | OQ0G007040 | 88.42  | 0.00E+00 | 1215 | F |     | NA       | Japanica |
| mukherjee-augustin gene-107-48-mRNA-1 | 3 | DNAERR0009793.01.T61 | 94.71 | 0.00E+00 | 1461 | OQ0G007040 | 94.71  | 0.00E+00 | 3473 | F | 954 | Japanica | Japanica |
| mukherjee-augustin gene-107-48-mRNA-1 | 3 | DNAERR0009794.01.T61 | 99.75 | 0.00E+00 | 1461 | OQ0G007040 | 99.75  | 0.00E+00 | 1215 | F | 954 | Japanica | Japanica |
| mukherjee-augustin gene-107-59-mRNA-1 | 3 | DNAERR0009795.01.T61 | 96.37 | 0.00E+00 | 1405 | OQ0G006060 | 100.00 | 0.00E+00 | 2091 | F | 112 | India    | Japanica |
| mukherjee-augustin gene-107-59-mRNA-1 | 3 | DNAERR0009796.01.T61 | 99.19 | 0.00E+00 | 2389 | OQ0G008700 | 96.20  | 0.00E+00 | 895  | F | 318 | India    | Japanica |
| mukherjee-augustin gene-107-59-mRNA-1 | 3 | DNAERR0009797.01.T61 | 97.98 | 0.00E+00 | 1738 | OQ0G007860 | 97.11  | 0.00E+00 | 1140 | F | 112 | India    | Japanica |
| mukherjee-augustin gene-107-59-mRNA-1 | 3 | DNAERR0009798.01.T61 | 99.53 | 0.00E+00 | 1187 | OQ0G008100 | 100.00 | 0.00E+00 | 1562 | F | 15  | NA       | Japanica |
| mukherjee-augustin gene-107-59-mRNA-1 | 3 | DNAERR0009799.01.T61 | 99.08 | 0.00E+00 | 1187 | OQ0G008100 | 100.00 | 0.00E+00 | 1562 | F | 15  | NA       | Japanica |
| mukherjee-augustin gene-107-59-mRNA-1 | 3 | DNAERR0009800.01.T61 | 99.53 | 0.00E+00 | 1187 | OQ0G008100 | 100.00 | 0.00E+00 | 1562 | F | 15  | NA       | Japanica |
| mukherjee-augustin gene-108-20-mRNA-1 | 3 | DNAERR0009801.01.T61 | 99.75 | 0.00E+00 | 1969 | OQ0G009200 | 99.97  | 0.00E+00 | 1491 | F | 306 | NA       | Japanica |
| mukherjee-augustin gene-108-20-mRNA-1 | 3 | DNAERR0009802.01.T61 | 99.71 | 0.00E+00 | 1889 | OQ0G009400 | 100.00 | 0.00E+00 | 1873 | F | 14  | NA       | Japanica |
| mukherjee-augustin gene-108-20-mRNA-1 | 3 | DNAERR0009803.01.T61 | 99.75 | 0.00E+00 | 1969 | OQ0G009200 | 99.97  | 0.00E+00 | 1491 | F | 306 | NA       | Japanica |
| mukherjee-augustin gene-109-40-mRNA-1 | 3 | DNAERR0009804.01.T61 | 99.58 | 0.00E+00 | 1969 | OQ0G009200 | 99.97  | 0.00E+00 | 1491 | F | 306 | NA       | Japanica |
| mukherjee-augustin gene-109-40-mRNA-1 | 3 | DNAERR0009805.01.T61 | 99.75 | 0.00E+00 | 1969 | OQ0G009200 | 99.97  | 0.00E+00 | 1491 | F | 306 | NA       | Japanica |
| mukherjee-augustin gene-109-40-mRNA-1 | 3 | DNAERR0009806.01.T61 | 99.58 | 0.00E+00 | 1969 | OQ0G009200 | 99.97  | 0.00E+00 | 1491 | F | 306 | NA       | Japanica |
| mukherjee-augustin gene-109-40-mRNA-1 | 3 | DNAERR0009807.01.T61 | 99.75 | 0.00E+00 | 1969 | OQ0G009200 | 99.97  | 0.00E+00 | 1491 | F | 306 | NA       | Japanica |
| mukherjee-augustin gene-110-11-mRNA-1 | 3 | DNAERR0009808.01.T61 | 99.58 | 0.00E+00 | 1969 | OQ0G009200 | 99.97  | 0.00E+00 | 1491 | F | 306 | NA       | Japanica |
| mukherjee-augustin gene-110-11-mRNA-1 | 3 | DNAERR0009809.01.T61 | 99.75 | 0.00E+00 | 1969 | OQ0G009200 | 99.97  | 0.00E+00 | 1491 | F | 306 | NA       | Japanica |
| mukherjee-augustin gene-110-11-mRNA-1 | 3 | DNAERR0009810.01.T61 | 99.58 | 0.00E+00 | 1969 | OQ0G009200 | 99.97  | 0.00E+00 | 1491 | F | 306 | NA       | Japanica |
| mukherjee-augustin gene-110-11-mRNA-1 | 3 | DNAERR0009811.01.T61 | 99.75 | 0.00E+00 | 1969 | OQ0G009200 | 99.97  | 0.00E+00 | 1491 | F | 306 | NA       | Japanica |
| mukherjee-augustin gene-110-11-mRNA-1 | 3 | DNAERR0009812.01.T61 | 99.58 | 0.00E+00 | 1969 | OQ0G009200 | 99.97  | 0.00E+00 | 1491 | F | 306 | NA       | Japanica |
| mukherjee-augustin gene-110-11-mRNA-1 | 3 | DNAERR0009813.01.T61 | 99.75 | 0.00E+00 | 1969 | OQ0G009200 | 99.97  | 0.00E+00 | 1491 | F | 306 | NA       | Japanica |
| mukherjee-augustin gene-110-11-mRNA-1 | 3 | DNAERR0009814.01.T61 | 99.58 | 0.00E+00 | 1969 | OQ0G009200 | 99.97  | 0.00E+00 | 1491 | F | 306 | NA       | Japanica |
| mukherjee-augustin gene-110-11-mRNA-1 | 3 | DNAERR0009815.01.T61 | 99.75 | 0.00E+00 | 1969 | OQ0G009200 | 99.97  | 0.00E+00 | 1491 | F | 306 | NA       | Japanica |
| mukherjee-augustin gene-110-11-mRNA-1 | 3 | DNAERR0009816.01.T61 | 99.58 | 0.00E+00 | 1969 | OQ0G009200 | 99.97  | 0.00E+00 | 1491 | F | 306 | NA       | Japanica |
| mukherjee-augustin gene-110-11-mRNA-1 | 3 | DNAERR0009817.01.T61 | 99.75 | 0.00E+00 | 1969 | OQ0G009200 | 99.97  | 0.00E+00 | 1491 | F | 306 | NA       | Japanica |
| mukherjee-augustin gene-11            |   |                      |       |          |      |            |        |          |      |   |     |          |          |

[illegible]







[illegible]

[illegible]

[illegible]

|                                     |   |                       |        |          |      |              |        |          |      |     |    |          |          |
|-------------------------------------|---|-----------------------|--------|----------|------|--------------|--------|----------|------|-----|----|----------|----------|
| maker-3-augustus-gene-481-01-mRNA-1 | 3 | DNA49960027840.01.101 | 100.00 | 0.00E+00 | 767  | DNA268018400 | 100.00 | 0.00E+00 | 767  | 0   | NA | Japonica | Japonica |
| maker-3-augustus-gene-482-01-mRNA-1 | 3 | DNA49960027841.01.101 | 99.87  | 0.00E+00 | 1338 | DNA268018800 | 100.00 | 0.00E+00 | 1347 | 849 | NA | Japonica | Japonica |
| maker-3-augustus-gene-483-01-mRNA-1 | 3 | DNA49960027842.01.101 | 99.96  | 0.00E+00 | 1338 | DNA268018800 | 100.00 | 0.00E+00 | 1347 | 849 | NA | Japonica | Japonica |
| maker-3-augustus-gene-484-01-mRNA-1 | 3 | DNA49960027843.01.101 | 99.94  | 0.00E+00 | 921  | DNA268019000 | 97.31  | 0.00E+00 | 948  | 27  | NA | Japonica | NA       |
| maker-3-augustus-gene-485-01-mRNA-1 | 3 | DNA49960027844.01.101 | 99.96  | 0.00E+00 | 805  | DNA268019200 | 100.00 | 0.00E+00 | 814  | 9   | NA | Japonica | NA       |
| maker-3-augustus-gene-486-01-mRNA-1 | 3 | DNA49960027845.01.101 | 99.96  | 0.00E+00 | 1000 | DNA268019400 | 97.96  | 0.00E+00 | 1008 | 8   | NA | Japonica | NA       |
| maker-3-augustus-gene-487-01-mRNA-1 | 3 | DNA49960027846.01.101 | 100.00 | 0.00E+00 | 1104 | DNA268019600 | 100.00 | 0.00E+00 | 1104 | 0   | NA | Japonica | NA       |
| maker-3-augustus-gene-488-01-mRNA-1 | 3 | DNA49960027847.01.101 | 100.00 | 0.00E+00 | 1104 | DNA268019600 | 100.00 | 0.00E+00 | 1104 | 0   | NA | Japonica | NA       |
| maker-3-augustus-gene-489-01-mRNA-1 | 3 | DNA49960027848.01.101 | 99.89  | 0.00E+00 | 1719 | DNA268019700 | 100.00 | 0.00E+00 | 1793 | 74  | NA | Japonica | NA       |
| maker-3-augustus-gene-490-01-mRNA-1 | 3 | DNA49960027849.01.101 | 99.97  | 0.00E+00 | 1719 | DNA268019700 | 100.00 | 0.00E+00 | 1793 | 74  | NA | Japonica | NA       |
| maker-3-augustus-gene-491-01-mRNA-1 | 3 | DNA49960027850.01.101 | 100.00 | 0.00E+00 | 899  | DNA268019900 | 100.00 | 0.00E+00 | 899  | 0   | NA | Japonica | NA       |
| maker-3-augustus-gene-492-01-mRNA-1 | 3 | DNA49960027851.01.101 | 100.00 | 0.00E+00 | 2200 | DNA268020000 | 100.00 | 0.00E+00 | 2246 | 46  | NA | Japonica | NA       |
| maker-3-augustus-gene-493-01-mRNA-1 | 3 | DNA49960027852.01.101 | 100.00 | 0.00E+00 | 1124 | DNA268020200 | 100.00 | 0.00E+00 | 1124 | 0   | NA | Japonica | NA       |
| maker-3-augustus-gene-494-01-mRNA-1 | 3 | DNA49960027853.01.101 | 99.93  | 0.00E+00 | 2048 | DNA268020300 | 100.00 | 0.00E+00 | 2057 | 9   | NA | Japonica | NA       |
| maker-3-augustus-gene-495-01-mRNA-1 | 3 | DNA49960027854.01.101 | 99.93  | 0.00E+00 | 2048 | DNA268020300 | 100.00 | 0.00E+00 | 2057 | 9   | NA | Japonica | NA       |
| maker-3-augustus-gene-496-01-mRNA-1 | 3 | DNA49960027855.01.101 | 99.84  | 0.00E+00 | 3450 | DNA268020500 | 100.00 | 0.00E+00 | 3463 | 13  | NA | Japonica | NA       |
| maker-3-augustus-gene-497-01-mRNA-1 | 3 | DNA49960027856.01.101 | 99.97  | 0.00E+00 | 1435 | DNA268020700 | 100.00 | 0.00E+00 | 1438 | 3   | NA | Japonica | NA       |
| maker-3-augustus-gene-498-01-mRNA-1 | 3 | DNA49960027857.01.101 | 99.97  | 0.00E+00 | 1435 | DNA268020700 | 100.00 | 0.00E+00 | 1438 | 3   | NA | Japonica | NA       |
| maker-3-augustus-gene-499-01-mRNA-1 | 3 | DNA49960027858.01.101 | 99.94  | 0.00E+00 | 1388 | DNA268021000 | 100.00 | 0.00E+00 | 1397 | 9   | NA | Japonica | NA       |
| maker-3-augustus-gene-500-01-mRNA-1 | 3 | DNA49960027859.01.101 | 99.92  | 0.00E+00 | 928  | DNA268021200 | 100.00 | 0.00E+00 | 938  | 5   | NA | Japonica | NA       |
| maker-3-augustus-gene-501-01-mRNA-1 | 3 | DNA49960027860.01.101 | 99.93  | 0.00E+00 | 3516 | DNA268021400 | 100.00 | 0.00E+00 | 3527 | 11  | NA | Japonica | NA       |
| maker-3-augustus-gene-502-01-mRNA-1 | 3 | DNA49960027861.01.101 | 99.93  | 0.00E+00 | 3516 | DNA268021400 | 100.00 | 0.00E+00 | 3527 | 11  | NA | Japonica | NA       |
| maker-3-augustus-gene-503-01-mRNA-1 | 3 | DNA49960027862.01.101 | 99.92  | 0.00E+00 | 2653 | DNA268021600 | 100.00 | 0.00E+00 | 2658 | 5   | NA | Japonica | NA       |
| maker-3-augustus-gene-504-01-mRNA-1 | 3 | DNA49960027863.01.101 | 99.93  | 0.00E+00 | 2653 | DNA268021600 | 100.00 | 0.00E+00 | 2658 | 5   | NA | Japonica | NA       |
| maker-3-augustus-gene-505-01-mRNA-1 | 3 | DNA49960027864.01.101 | 99.93  | 0.00E+00 | 1581 | DNA268021800 | 100.00 | 0.00E+00 | 1581 | 0   | NA | Japonica | NA       |
| maker-3-augustus-gene-506-01-mRNA-1 | 3 | DNA49960027865.01.101 | 99.93  | 0.00E+00 | 1581 | DNA268021800 | 100.00 | 0.00E+00 | 1581 | 0   | NA | Japonica | NA       |
| maker-3-augustus-gene-507-01-mRNA-1 | 3 | DNA49960027866.01.101 | 99.87  | 0.00E+00 | 3023 | DNA268021900 | 99.82  | 0.00E+00 | 3028 | 5   | NA | Japonica | NA       |
| maker-3-augustus-gene-508-01-mRNA-1 | 3 | DNA49960027867.01.101 | 99.73  | 0.00E+00 | 2880 | DNA268022000 | 99.74  | 0.00E+00 | 2884 | 4   | NA | Japonica | NA       |
| maker-3-augustus-gene-509-01-mRNA-1 | 3 | DNA49960027868.01.101 | 100.00 | 0.00E+00 | 1981 | DNA268022100 | 100.00 | 0.00E+00 | 1981 | 0   | NA | Japonica | NA       |
| maker-3-augustus-gene-510-01-mRNA-1 | 3 | DNA49960027869.01.101 | 99.92  | 0.00E+00 | 2216 | DNA268022200 | 99.92  | 0.00E+00 | 2216 | 0   | NA | Japonica | NA       |
| maker-3-augustus-gene-511-01-mRNA-1 | 3 | DNA49960027870.01.101 | 99.92  | 0.00E+00 | 1693 | DNA268022300 | 99.88  | 0.00E+00 | 1693 | 38  | NA | Japonica | NA       |
| maker-3-augustus-gene-512-01-mRNA-1 | 3 | DNA49960027871.01.101 | 99.88  | 0.00E+00 | 1479 | DNA268022400 | 100.00 | 0.00E+00 | 1483 | 4   | NA | Japonica | NA       |
| maker-3-augustus-gene-513-01-mRNA-1 | 3 | DNA49960027872.01.101 | 99.88  | 0.00E+00 | 1479 | DNA268022400 | 100.00 | 0.00E+00 | 1483 | 4   | NA | Japonica | NA       |
| maker-3-augustus-gene-514-01-mRNA-1 | 3 | DNA49960027873.01.101 | 99.88  | 0.00E+00 | 1479 | DNA268022400 | 100.00 | 0.00E+00 | 1483 | 4   | NA | Japonica | NA       |
| maker-3-augustus-gene-515-01-mRNA-1 | 3 | DNA49960027874.01.101 | 99.88  | 0.00E+00 | 1479 | DNA268022400 | 100.00 | 0.00E+00 | 1483 | 4   | NA | Japonica | NA       |
| maker-3-augustus-gene-516-01-mRNA-1 | 3 | DNA49960027875.01.101 | 99.88  | 0.00E+00 | 1479 | DNA268022400 | 100.00 | 0.00E+00 | 1483 | 4   | NA | Japonica | NA       |
| maker-3-augustus-gene-517-01-mRNA-1 | 3 | DNA49960027876.01.101 | 99.88  | 0.00E+00 | 1479 | DNA268022400 | 100.00 | 0.00E+00 | 1483 | 4   | NA | Japonica | NA       |
| maker-3-augustus-gene-518-01-mRNA-1 | 3 | DNA49960027877.01.101 | 99.88  | 0.00E+00 | 1479 | DNA268022400 | 100.00 | 0.00E+00 | 1483 | 4   | NA | Japonica | NA       |
| maker-3-augustus-gene-519-01-mRNA-1 | 3 | DNA49960027878.01.101 | 99.88  | 0.00E+00 | 1479 | DNA268022400 | 100.00 | 0.00E+00 | 1483 | 4   | NA | Japonica | NA       |
| maker-3-augustus-gene-520-01-mRNA-1 | 3 | DNA49960027879.01.101 | 99.88  | 0.00E+00 | 1479 | DNA268022400 | 100.00 | 0.00E+00 | 1483 | 4   | NA | Japonica | NA       |
| maker-3-augustus-gene-521-01-mRNA-1 | 3 | DNA49960027880.01.101 | 99.88  | 0.00E+00 | 1479 | DNA268022400 | 100.00 | 0.00E+00 | 1483 | 4   | NA | Japonica | NA       |
| maker-3-augustus-gene-522-01-mRNA-1 | 3 | DNA49960027881.01.101 | 99.88  | 0.00E+00 | 1479 | DNA268022400 | 100.00 | 0.00E+00 | 1483 | 4   | NA | Japonica | NA       |
| maker-3-augustus-gene-523-01-mRNA-1 | 3 | DNA49960027882.01.101 | 99.88  | 0.00E+00 | 1479 | DNA268022400 | 100.00 | 0.00E+00 | 1483 | 4   | NA | Japonica | NA       |
| maker-3-augustus-gene-524-01-mRNA-1 | 3 | DNA49960027883.01.101 | 99.88  | 0.00E+00 | 1479 | DNA268022400 | 100.00 | 0.00E+00 | 1483 | 4   | NA | Japonica | NA       |
| maker-3-augustus-gene-525-01-mRNA-1 | 3 | DNA49960027884.01.101 | 99.88  | 0.00E+00 | 1479 | DNA268022400 | 100.00 | 0.00E+00 | 1483 | 4   | NA | Japonica | NA       |
| maker-3-augustus-gene-526-01-mRNA-1 | 3 | DNA49960027885.01.101 | 99.88  | 0.00E+00 | 1479 | DNA268022400 | 100.00 | 0.00E+00 | 1483 | 4   | NA | Japonica | NA       |
| maker-3-augustus-gene-527-01-mRNA-1 | 3 | DNA49960027886.01.101 | 99.88  | 0.00E+00 | 1479 | DNA268022400 | 100.00 | 0.00E+00 | 1483 | 4   | NA | Japonica | NA       |
| maker-3-augustus-gene-528-01-mRNA-1 | 3 | DNA49960027887.01.101 | 99.88  | 0.00E+00 | 1479 | DNA268022400 | 100.00 | 0.00E+00 | 1483 | 4   | NA | Japonica | NA       |
| maker-3-augustus-gene-529-01-mRNA-1 | 3 | DNA49960027888.01.101 | 99.88  | 0.00E+00 | 1479 | DNA268022400 | 100.00 | 0.00E+00 | 1483 | 4   | NA | Japonica | NA       |
| maker-3-augustus-gene-530-01-mRNA-1 | 3 | DNA49960027889.01.101 | 99.88  | 0.00E+00 | 1479 | DNA268022400 | 100.00 | 0.00E+00 | 1483 | 4   | NA | Japonica | NA       |
| maker-3-augustus-gene-531-01-mRNA-1 | 3 | DNA49960027890.01.101 | 99.88  | 0.00E+00 | 1479 | DNA268022400 | 100.00 | 0.00E+00 | 1483 | 4   | NA | Japonica | NA       |
| maker-3-augustus-gene-532-01-mRNA-1 | 3 | DNA49960027891.01.101 | 99.88  | 0.00E+00 | 1479 | DNA268022400 | 100.00 | 0.00E+00 | 1483 | 4   | NA | Japonica | NA       |
| maker-3-augustus-gene-533-01-mRNA-1 | 3 | DNA49960027892.01.101 | 99.88  | 0.00E+00 | 1479 | DNA268022400 | 100.00 | 0.00E+00 | 1483 | 4   | NA | Japonica | NA       |
| maker-3-augustus-gene-534-01-mRNA-1 | 3 | DNA49960027893.01.101 | 99.88  | 0.00E+00 | 1479 | DNA268022400 | 100.00 | 0.00E+00 | 1483 | 4   | NA | Japonica | NA       |
| maker-3-augustus-gene-535-01-mRNA-1 | 3 | DNA49960027894.01.101 | 99.88  | 0.00E+00 | 1479 | DNA268022400 | 100.00 | 0.00E+00 | 1483 | 4   | NA | Japonica | NA       |
| maker-3-augustus-gene-536-01-mRNA-1 | 3 | DNA49960027895.01.101 | 99.88  | 0.00E+00 | 1479 | DNA268022400 | 100.00 | 0.00E+00 | 1483 | 4   | NA | Japonica | NA       |
| maker-3-augustus-gene-537-01-mRNA-1 | 3 | DNA49960027896.01.101 | 99.88  | 0.00E+00 | 1479 | DNA268022400 | 100.00 | 0.00E+00 | 1483 | 4   | NA | Japonica | NA       |
| maker-3-augustus-gene-538-01-mRNA-1 | 3 | DNA49960027897.01.101 | 99.88  | 0.00E+00 | 1479 | DNA268022400 | 100.00 | 0.00E+00 | 1483 | 4   | NA | Japonica | NA       |
| maker-3-augustus-gene-539-01-mRNA-1 | 3 | DNA49960027898.01.101 | 99.88  | 0.00E+00 | 1479 | DNA268022400 | 100.00 | 0.00E+00 | 1483 | 4   | NA | Japonica | NA       |
| maker-3-augustus-gene-540-01-mRNA-1 | 3 | DNA49960027899.01.101 | 99.88  | 0.00E+00 | 1479 | DNA268022400 | 100.00 | 0.00E+00 | 1483 | 4   | NA | Japonica | NA       |
| maker-3-augustus-gene-541-01-mRNA-1 | 3 | DNA49960027900.01.101 | 99.88  | 0.00E+00 | 1479 | DNA268022400 | 100.00 | 0.00E+00 | 1483 | 4   | NA | Japonica | NA       |
| maker-3-augustus-gene-542-01-mRNA-1 | 3 | DNA49960027901.01.101 | 99.88  | 0.00E+00 | 1479 | DNA268022400 | 100.00 | 0.00E+00 | 1483 | 4   | NA | Japonica | NA       |
| maker-3-augustus-gene-543-01-mRNA-1 | 3 | DNA49960027902.01.101 | 99.88  | 0.00E+00 | 1479 | DNA268022400 | 100.00 | 0.00E+00 | 1483 | 4   | NA | Japonica | NA       |
| maker-3-augustus-gene-544-01-mRNA-1 | 3 | DNA49960027903.01.101 | 99.88  | 0.00E+00 | 1479 | DNA268022400 | 100.00 | 0.00E+00 | 1483 | 4   | NA | Japonica | NA       |
| maker-3-augustus-gene-545-01-mRNA-1 | 3 | DNA49960027904.01.101 | 99.88  | 0.00E+00 | 1479 | DNA268022400 | 100.00 | 0.00E+00 | 1483 | 4   | NA | Japonica | NA       |
| maker-3-augustus-gene-546-01-mRNA-1 | 3 | DNA49960027905.01.101 | 99.88  | 0.00E+00 | 1479 | DNA268022400 | 100.00 | 0.00E+00 | 1483 | 4   | NA | Japonica | NA       |
| maker-3-augustus-gene-547-01-mRNA-1 | 3 | DNA49960027906.01.101 | 99.88  | 0.00E+00 | 1479 | DNA268022400 | 100.00 | 0.00E+00 | 1483 | 4   | NA | Japonica | NA       |
| maker-3-augustus-gene-548-01-mRNA-1 | 3 | DNA49960027907.01.101 | 99.88  | 0.00E+00 | 1479 | DNA268022400 | 100.00 | 0.00E+00 | 1483 | 4   | NA | Japonica | NA       |
| maker-3-augustus-gene-549-01-mRNA-1 | 3 | DNA49960027908.01.101 | 99.88  | 0.00E+00 | 1479 | DNA268022400 | 100.00 | 0.00E+00 | 1483 | 4   | NA | Japonica | NA       |
| maker-3-augustus-gene-550-01-mRNA-1 | 3 | DNA49960027909.01.101 | 99.88  | 0.00E+00 | 1479 | DNA268022400 | 100.00 | 0.00E+00 | 1483 | 4   | NA | Japonica | NA       |
| maker-3-augustus-gene-551-01-mRNA-1 | 3 | DNA49960027910.01.101 | 99.88  | 0.00E+00 | 1479 | DNA268022400 | 100.00 | 0.00E+00 | 1483 | 4   | NA | Japonica | NA       |
| maker-3-augustus-gene-552-01-mRNA-1 | 3 | DNA49960027911.01.101 | 99.88  | 0.00E+00 | 1479 | DNA268022400 | 100.00 | 0.00E+00 | 1483 | 4   | NA | Japonica | NA       |
| maker-3-augustus-gene-553-01-mRNA-1 | 3 | DNA49960027912.01.101 | 99.88  | 0.00E+00 | 1479 | DNA268022400 | 100.00 | 0.00E+00 | 1483 | 4   | NA | Japonica | NA       |
| maker-3-augustus-gene-554-01-mRNA-1 | 3 | DNA49960027913.01.101 | 99.88  | 0.00E+00 | 1479 | DNA268022400 | 100.00 | 0.00E+00 | 1483 | 4   | NA | Japonica | NA       |
| maker-3-augustus-gene-555-01-mRNA-1 | 3 | DNA49960027914.01.101 | 99.88  | 0.00E+00 | 1479 | DNA268022400 | 100.00 | 0.00E+00 | 1483 | 4   | NA | Japonica | NA       |
| maker-3-augustus-gene-556-01-mRNA-1 | 3 | DNA49960027915.01.101 | 99.88  | 0.00E+00 | 1479 | DNA268022400 | 100.00 | 0.00E+00 | 1483 | 4   | NA | Japon    |          |



|                                     |   |                         |        |           |           |              |       |           |      |      |          |          |
|-------------------------------------|---|-------------------------|--------|-----------|-----------|--------------|-------|-----------|------|------|----------|----------|
| maker 1 augustine gsm 82.50 mNMA-1  | 3 | D4K4980305014000.01.102 | 99.79  | 0.00E+00  | 3429      | D5G026290300 | 00036 | 0.00E+00  | 2516 | -713 | indica   | NA       |
| maker 2 augustine gsm 82.24 mNMA-1  | 3 | D4K498030414000.01.102  | 99.81  | 0.00E+00  | 929       | D5G026290300 | 00036 | 0.00E+00  | 935  | 6    | NA       | NA       |
| maker 3 augustine gsm 82.11 mNMA-1  | 3 | D4K498030314000.01.102  | 99.83  | 0.00E+00  | 1019      | D5G026290300 | 00036 | 0.00E+00  | 2159 | 0    | NA       | NA       |
| maker 4 augustine gsm 82.1 mNMA-1   | 3 | D4K498030214000.01.102  | 99.64  | 0.00E+00  | 4974      | D5G026290300 | 00036 | 0.00E+00  | 4626 | -348 | NA       | Japanica |
| maker 5 augustine gsm 82.1 mNMA-1   | 3 | D4K49803015100.01.101   | 99.43  | 0.00E+00  | 2191      | D5G026290300 | 00036 | 0.00E+00  | 2200 | 0    | NA       | Japanica |
| maker 6 augustine gsm 82.0 mNMA-1   | 3 | D4K498030015100.01.101  | 99.86  | 0.00E+00  | 894       | D5G026290300 | 00036 | 0.00E+00  | 775  | 136  | indica   | Japanica |
| maker 7 augustine gsm 82.0 mNMA-1   | 3 | D4K49803021800.01.102   | 99.81  | 0.00E+00  | 950       | D5G026290300 | 00036 | 0.00E+00  | 955  | 5    | NA       | Japanica |
| maker 8 augustine gsm 82.0 mNMA-1   | 3 | D4K4980301200.01.102    | 99.75  | 0.00E+00  | 1177      | D5G026290300 | 00036 | 0.00E+00  | 1002 | 0    | NA       | Japanica |
| maker 9 augustine gsm 84.48 mNMA-1  | 3 | D4K49803042490.01.102   | 99.85  | 0.00E+00  | 1289      | D5G026290300 | 00036 | 0.00E+00  | 1153 | 264  | Japanica | Japanica |
| maker 10 augustine gsm 84.48 mNMA-1 | 3 | D4K49803032490.01.102   | 99.83  | 0.00E+00  | 1289      | D5G026290300 | 00036 | 0.00E+00  | 1153 | 264  | Japanica | Japanica |
| maker 11 augustine gsm 84.5 mNMA-1  | 3 | D4K49803052490.01.102   | 99.87  | 0.00E+00  | 1482      | D5G026290300 | 00036 | 0.00E+00  | 1407 | 5    | NA       | Japanica |
| maker 12 augustine gsm 84.5 mNMA-1  | 3 | D4K49803042490.01.101   | 99.81  | 0.00E+00  | 1847      | D5G026290300 | 00036 | 0.00E+00  | 1856 | 9    | NA       | Japanica |
| maker 13 augustine gsm 84.5 mNMA-1  | 3 | D4K49803032490.01.101   | 99.83  | 0.00E+00  | 1847      | D5G026290300 | 00036 | 0.00E+00  | 1856 | 9    | NA       | Japanica |
| maker 14 augustine gsm 84.5 mNMA-1  | 3 | D4K49803022490.01.101   | 99.73  | 0.00E+00  | 2287      | D5G026290300 | 00036 | 0.00E+00  | 2318 | 29   | NA       | Japanica |
| maker 15 augustine gsm 84.5 mNMA-1  | 3 | D4K49803012490.01.101   | 99.84  | 0.00E+00  | 2287      | D5G026290300 | 00036 | 0.00E+00  | 2318 | 29   | NA       | Japanica |
| maker 16 augustine gsm 86.33 mNMA-1 | 3 | D4K498030547300.01.102  | 99.84  | 0.00E+00  | 2242      | D5G026290300 | 00036 | 0.00E+00  | 2251 | 9    | NA       | Japanica |
| maker 17 augustine gsm 86.33 mNMA-1 | 3 | D4K498030447300.01.102  | 99.84  | 0.00E+00  | 2242      | D5G026290300 | 00036 | 0.00E+00  | 2251 | 9    | NA       | Japanica |
| maker 18 augustine gsm 86.33 mNMA-1 | 3 | D4K498030347300.01.102  | 99.78  | 0.00E+00  | 1736      | D5G026290300 | 00036 | 0.00E+00  | 1734 | 28   | NA       | Japanica |
| maker 19 augustine gsm 86.33 mNMA-1 | 3 | D4K498030247300.01.101  | 99.89  | 0.00E+00  | 3184      | D5G026290300 | 00036 | 0.00E+00  | 3193 | 9    | NA       | Japanica |
| maker 20 augustine gsm 86.33 mNMA-1 | 3 | D4K498030147300.01.101  | 99.79  | 0.00E+00  | 3184      | D5G026290300 | 00036 | 0.00E+00  | 3193 | 9    | NA       | Japanica |
| maker 21 augustine gsm 86.33 mNMA-1 | 3 | D4K49803053630.01.102   | 100.00 | 0.00E+00  | 4.49E+137 | D5G026290300 | 00036 | 1.54E+137 | 488  | 0    | NA       | Japanica |
| maker 22 augustine gsm 86.33 mNMA-1 | 3 | D4K49803043630.01.102   | 99.79  | 0.00E+00  | 1.47E+137 | D5G026290300 | 00036 | 1.54E+137 | 488  | 0    | NA       | Japanica |
| maker 23 augustine gsm 86.33 mNMA-1 | 3 | D4K49803033630.01.102   | 99.51  | 0.00E+00  | 1084      | D5G026290300 | 00036 | 0.00E+00  | 1099 | 17   | NA       | Japanica |
| maker 24 augustine gsm 86.33 mNMA-1 | 3 | D4K49803023630.01.102   | 99.63  | 0.00E+00  | 2546      | D5G026290300 | 00036 | 0.00E+00  | 2554 | 1194 | indica   | Japanica |
| maker 25 augustine gsm 86.33 mNMA-1 | 3 | D4K49803013630.01.102   | 99.94  | 0.00E+00  | 3048      | D5G026290300 | 00036 | 0.00E+00  | 3052 | 4    | NA       | Japanica |
| maker 26 augustine gsm 86.33 mNMA-1 | 3 | D4K498030549270.01.102  | 100.00 | 0.00E+00  | 1878      | D5G026290300 | 00036 | 0.00E+00  | 1878 | 0    | NA       | Japanica |
| maker 27 augustine gsm 86.33 mNMA-1 | 3 | D4K498030449270.01.102  | 100.00 | 0.00E+00  | 1.47E+137 | D5G026290300 | 00036 | 1.54E+137 | 1878 | 0    | NA       | Japanica |
| maker 28 augustine gsm 86.33 mNMA-1 | 3 | D4K498030349270.01.102  | 99.84  | 0.00E+00  | 2184      | D5G026290300 | 00036 | 0.00E+00  | 2203 | 9    | NA       | Japanica |
| maker 29 augustine gsm 86.33 mNMA-1 | 3 | D4K498030249270.01.101  | 99.83  | 0.00E+00  | 4234      | D5G026290300 | 00036 | 0.00E+00  | 4252 | 18   | NA       | Japanica |
| maker 30 augustine gsm 86.33 mNMA-1 | 3 | D4K498030149270.01.101  | 99.58  | 0.00E+00  | 3944      | D5G026290300 | 00036 | 0.00E+00  | 3953 | 9    | NA       | Japanica |
| maker 31 augustine gsm 86.33 mNMA-1 | 3 | D4K498030544440.01.102  | 99.87  | 0.00E+00  | 1343      | D5G026290300 | 00036 | 0.00E+00  | 1348 | 5    | NA       | Japanica |
| maker 32 augustine gsm 86.33 mNMA-1 | 3 | D4K49803044440.01.102   | 99.73  | 0.00E+00  | 1913      | D5G026290300 | 00036 | 0.00E+00  | 1911 | 0    | NA       | Japanica |
| maker 33 augustine gsm 86.33 mNMA-1 | 3 | D4K498030344440.01.102  | 99.82  | 0.00E+00  | 1950      | D5G026290300 | 00036 | 0.00E+00  | 1959 | 9    | NA       | Japanica |
| maker 34 augustine gsm 86.33 mNMA-1 | 3 | D4K498030244440.01.101  | 99.73  | 0.00E+00  | 2128      | D5G026290300 | 00036 | 0.00E+00  | 2138 | 0    | NA       | Japanica |
| maker 35 augustine gsm 86.33 mNMA-1 | 3 | D4K498030144440.01.101  | 99.73  | 0.00E+00  | 2839      | D5G026290300 | 00036 | 0.00E+00  | 2837 | 18   | NA       | Japanica |
| maker 36 augustine gsm 87.7 mNMA-1  | 3 | D4K498030549270.01.102  | 99.68  | 1.26E-136 | 134       | D5G026290300 | 00036 | 1.00E-136 | 136  | 0    | NA       | Japanica |
| maker 37 augustine gsm 87.7 mNMA-1  | 3 | D4K498030449270.01.101  | 99.78  | 0.00E+00  | 134       | D5G026290300 | 00036 | 1.00E-136 | 136  | 0    | NA       | Japanica |
| maker 38 augustine gsm 87.7 mNMA-1  | 3 | D4K498030349270.01.101  | 99.61  | 0.00E+00  | 3057      | D5G026290300 | 00036 | 0.00E+00  | 3059 | 22   | NA       | Japanica |
| maker 39 augustine gsm 87.7 mNMA-1  | 3 | D4K498030249270.01.101  | 99.73  | 0.00E+00  | 3057      | D5G026290300 | 00036 | 0.00E+00  | 3059 | 22   | NA       | Japanica |
| maker 40 augustine gsm 87.7 mNMA-1  | 3 | D4K498030149270.01.101  | 99.73  | 0.00E+00  | 1418      | D5G026290300 | 00036 | 0.00E+00  | 1447 | 9    | NA       | Japanica |
| maker 41 augustine gsm 87.7 mNMA-1  | 3 | D4K498030543630.01.102  | 99.84  | 0.00E+00  | 1418      | D5G026290300 | 00036 | 0.00E+00  | 1447 | 9    | NA       | Japanica |
| maker 42 augustine gsm 87.7 mNMA-1  | 3 | D4K49803043630.01.102   | 99.94  | 0.00E+00  | 2923      | D5G026290300 | 00036 | 0.00E+00  | 2938 | 5    | NA       | Japanica |
| maker 43 augustine gsm 87.7 mNMA-1  | 3 | D4K49803033630.01.102   | 99.84  | 0.00E+00  | 4487      | D5G026290300 | 00036 | 0.00E+00  | 4498 | 18   | NA       | Japanica |
| maker 44 augustine gsm 87.7 mNMA-1  | 3 | D4K49803023630.01.102   | 99.84  | 0.00E+00  | 4487      | D5G026290300 | 00036 | 0.00E+00  | 4498 | 18   | NA       | Japanica |
| maker 45 augustine gsm 87.7 mNMA-1  | 3 | D4K49803013630.01.102   | 99.72  | 0.00E+00  | 1930      | D5G026290300 | 00036 | 0.00E+00  | 1934 | 14   | NA       | Japanica |
| maker 46 augustine gsm 88.7 mNMA-1  | 3 | D4K498030549270.01.102  | 99.88  | 0.00E+00  | 1930      | D5G026290300 | 00036 | 0.00E+00  | 1934 | 14   | NA       | Japanica |
| maker 47 augustine gsm 88.7 mNMA-1  | 3 | D4K498030449270.01.101  | 99.73  | 0.00E+00  | 2845      | D5G026290300 | 00036 | 0.00E+00  | 2897 | 52   | NA       | Japanica |
| maker 48 augustine gsm 88.7 mNMA-1  | 3 | D4K498030349270.01.101  | 99.73  | 0.00E+00  | 2845      | D5G026290300 | 00036 | 0.00E+00  | 2897 | 52   | NA       | Japanica |
| maker 49 augustine gsm 88.7 mNMA-1  | 3 | D4K498030249270.01.101  | 99.88  | 0.00E+00  | 1333      | D5G026290300 | 00036 | 0.00E+00  | 1337 | 4    | NA       | Japanica |
| maker 50 augustine gsm 88.7 mNMA-1  | 3 | D4K498030149270.01.101  | 99.73  | 0.00E+00  | 662       | D5G026290300 | 00036 | 0.00E+00  | 774  | 112  | NA       | Japanica |
| maker 51 augustine gsm 89.3 mNMA-1  | 3 | D4K498030543630.01.102  | 99.84  | 0.00E+00  | 958       | D5G026290300 | 00036 | 0.00E+00  | 959  | 0    | NA       | Japanica |
| maker 52 augustine gsm 89.3 mNMA-1  | 3 | D4K49803043630.01.102   | 99.80  | 0.00E+00  | 958       | D5G026290300 | 00036 | 0.00E+00  | 952  | 4    | NA       | Japanica |
| maker 53 augustine gsm 89.3 mNMA-1  | 3 | D4K49803033630.01.102   | 99.90  | 0.00E+00  | 3499      | D5G026290300 | 00036 | 0.00E+00  | 3508 | 9    | NA       | Japanica |
| maker 54 augustine gsm 89.3 mNMA-1  | 3 | D4K49803023630.01.102   | 99.80  | 0.00E+00  | 1748      | D5G026290300 | 00036 | 0.00E+00  | 1748 | 0    | NA       | Japanica |
| maker 55 augustine gsm 89.3 mNMA-1  | 3 | D4K49803013630.01.102   | 100.00 | 0.00E+00  | 1880      | D5G026290300 | 00036 | 0.00E+00  | 1881 | 1389 | indica   | Japanica |
| maker 56 augustine gsm 90.3 mNMA-1  | 3 | D4K498030541490.01.102  | 99.67  | 0.00E+00  | 1097      | D5G026290300 | 00036 | 0.00E+00  | 1106 | 9    | NA       | Japanica |
| maker 57 augustine gsm 90.3 mNMA-1  | 3 | D4K49803041490.01.102   | 99.67  | 0.00E+00  | 1097      | D5G026290300 | 00036 | 0.00E+00  | 1106 | 9    | NA       | Japanica |
| maker 58 augustine gsm 90.3 mNMA-1  | 3 | D4K49803031490.01.102   | 99.63  | 0.00E+00  | 3388      | D5G026290300 | 00036 | 0.00E+00  | 3411 | 23   | NA       | Japanica |
| maker 59 augustine gsm 90.3 mNMA-1  | 3 | D4K49803021490.01.101   | 99.63  | 0.00E+00  | 2030      | D5G026290300 | 00036 | 0.00E+00  | 2030 | 0    | NA       | Japanica |
| maker 60 augustine gsm 90.3 mNMA-1  | 3 | D4K4980301490.01.101    | 100.00 | 0.00E+00  | 2750      | D5G026290300 | 00036 | 0.00E+00  | 2759 | 2021 | indica   | Japanica |
| maker 61 augustine gsm 91.0 mNMA-1  | 3 | D4K498030543630.01.102  | 100.00 | 0.00E+00  | 3036      | D5G026290300 | 00036 | 0.00E+00  | 3036 | 0    | NA       | Japanica |
| maker 62 augustine gsm 91.0 mNMA-1  | 3 | D4K49803043630.01.102   | 100.00 | 0.00E+00  | 3036      | D5G026290300 | 00036 | 0.00E+00  | 3036 | 0    | NA       | Japanica |
| maker 63 augustine gsm 91.0 mNMA-1  | 3 | D4K49803033630.01.102   | 100.00 | 0.00E+00  | 2425      | D5G026290300 | 00036 | 0.00E+00  | 2425 | 0    | NA       | Japanica |
| maker 64 augustine gsm 91.0 mNMA-1  | 3 | D4K49803023630.01.102   | 100.00 | 0.00E+00  | 758       | D5G026290300 | 00036 | 0.00E+00  | 758  | 0    | NA       | Japanica |
| maker 65 augustine gsm 91.0 mNMA-1  | 3 | D4K49803013630.01.102   | 100.00 | 0.00E+00  | 3523      | D5G026290300 | 00036 | 0.00E+00  | 3523 | 0    | NA       | Japanica |
| maker 66 augustine gsm 91.0 mNMA-1  | 3 | D4K498030543630.01.102  | 99.63  | 0.00E+00  | 1900      | D5G026290300 | 00036 | 0.00E+00  | 1900 | 0    | NA       | Japanica |
| maker 67 augustine gsm 91.0 mNMA-1  | 3 | D4K49803043630.01.102   | 100.00 | 0.00E+00  | 1900      | D5G026290300 | 00036 | 0.00E+00  | 1900 | 0    | NA       | Japanica |
| maker 68 augustine gsm 91.0 mNMA-1  | 3 | D4K49803033630.01.102   | 100.00 | 0.00E+00  | 2030      | D5G026290300 | 00036 | 0.00E+00  | 2030 | 0    | NA       | Japanica |
| maker 69 augustine gsm 91.0 mNMA-1  | 3 | D4K49803023630.01.102   | 100.00 | 0.00E+00  | 2030      | D5G026290300 | 00036 | 0.00E+00  | 2030 | 0    | NA       | Japanica |
| maker 70 augustine gsm 91.0 mNMA-1  | 3 | D4K49803013630.01.102   | 100.00 | 0.00E+00  | 2030      | D5G026290300 | 00036 | 0.00E+00  | 2030 | 0    | NA       | Japanica |
| maker 71 augustine gsm 91.0 mNMA-1  | 3 | D4K498030543630.01.102  | 100.00 | 0.00E+00  | 2750      | D5G026290300 | 00036 | 0.00E+00  | 2759 | 2021 | indica   | Japanica |
| maker 72 augustine gsm 91.0 mNMA-1  | 3 | D4K49803043630.01.102   | 100.00 | 0.00E+00  | 3036      | D5G026290300 | 00036 | 0.00E+00  | 3036 | 0    | NA       | Japanica |
| maker 73 augustine gsm 91.0 mNMA-1  | 3 | D4K49803033630.01.102   | 100.00 | 0.00E+00  | 3036      | D5G026290300 | 00036 | 0.00E+00  | 3036 | 0    | NA       | Japanica |
| maker 74 augustine gsm 91.0 mNMA-1  | 3 | D4K49803023630.01.102   | 100.00 | 0.00E+00  | 2425      | D5G026290300 | 00036 | 0.00E+00  | 2425 | 0    | NA       | Japanica |
| maker 75 augustine gsm 91.0 mNMA-1  | 3 | D4K49803013630.01.102   | 100.00 | 0.00E+00  | 758       | D5G026290300 | 00036 | 0.00E+00  | 758  | 0    | NA       | Japanica |
| maker 76 augustine gsm 91.0 mNMA-1  | 3 | D4K498030543630.01.102  | 100.00 | 0.00E+00  | 3523      | D5G026290300 | 00036 | 0.00E+00  | 3523 | 0    | NA       | Japanica |
| maker 77 augustine gsm 91.0 mNMA-1  | 3 | D4K49803043630.01.102   | 100.00 | 0.00E+00  | 3523      | D5G026290300 | 00036 | 0.00E+00  | 3523 | 0    | NA       | Japanica |
| maker 78 augustine gsm 91.0 mNMA-1  | 3 | D4K49803033630.01.102   | 100.00 | 0.00E+00  | 1900      | D5G026290300 | 00036 | 0.00E+00  | 1900 | 0    | NA       | Japanica |
| maker 79 augustine gsm 91.0 mNMA    |   |                         |        |           |           |              |       |           |      |      |          |          |









[illegible]

[illegible]



|                               |   |                       |        |          |      |             |         |           |      |     |    |         |
|-------------------------------|---|-----------------------|--------|----------|------|-------------|---------|-----------|------|-----|----|---------|
| maker-4-augustin-285.19-mb1-1 | 4 | 0x48f896040428-01-102 | 99.83  | 0.00E+00 | 3367 | 0x060460200 | 99.95   | 0.00E+00  | 3364 | 27  | NA | Japonya |
| maker-4-augustin-285.19-mb1-1 | 4 | 0x48f896040430-01-102 | 100.00 | 0.00E+00 | 3420 | 0x060460300 | 100.00  | 0.00E+00  | 3420 | 0   | NA | Japonya |
| maker-4-augustin-285.19-mb1-1 | 4 | 0x48f896040432-01-102 | 99.81  | 0.00E+00 | 3420 | 0x060460400 | 99.98   | 0.00E+00  | 3420 | 150 | NA | Japonya |
| maker-4-augustin-285.19-mb1-1 | 4 | 0x48f896040434-01-102 | 99.62  | 0.00E+00 | 651  | 0x060462000 | 94.87   | 1.18E-130 | 3958 | 53  | NA | Japonya |
| maker-4-augustin-285.19-mb1-1 | 4 | 0x48f896040436-01-102 | 99.86  | 0.00E+00 | 3916 | 0x060464000 | 100.00  | 0.00E+00  | 3916 | 18  | NA | Japonya |
| maker-4-augustin-285.19-mb1-1 | 4 | 0x48f896040438-01-102 | 99.83  | 0.00E+00 | 1808 | 0x060466000 | 100.00  | 0.00E+00  | 1808 | 27  | NA | Japonya |
| maker-4-augustin-285.19-mb1-1 | 4 | 0x48f896040440-01-102 | 99.89  | 0.00E+00 | 1383 | 0x060468000 | 100.00  | 0.00E+00  | 1383 | 5   | NA | Japonya |
| maker-4-augustin-285.19-mb1-1 | 4 | 0x48f896040442-01-102 | 99.81  | 0.00E+00 | 1041 | 0x060470000 | 100.00  | 0.00E+00  | 1041 | 18  | NA | Japonya |
| maker-4-augustin-285.19-mb1-1 | 4 | 0x48f896040444-01-102 | 99.83  | 0.00E+00 | 979  | 0x060472000 | 99.85   | 0.00E+00  | 979  | 18  | NA | Japonya |
| maker-4-augustin-285.19-mb1-1 | 4 | 0x48f896040446-01-102 | 100.00 | 0.00E+00 | 1944 | 0x060480000 | 100.00  | 0.00E+00  | 1948 | 4   | NA | Japonya |
| maker-4-augustin-285.19-mb1-1 | 4 | 0x48f896040448-01-102 | 100.00 | 0.00E+00 | 1049 | 0x060490000 | 100.00  | 0.00E+00  | 1049 | 43  | NA | Japonya |
| maker-4-augustin-285.19-mb1-1 | 4 | 0x48f896040450-01-102 | 99.73  | 0.00E+00 | 954  | 0x060492000 | 99.42   | 0.00E+00  | 958  | 338 | NA | Japonya |
| maker-4-augustin-285.19-mb1-1 | 4 | 0x48f896040452-01-102 | 100.00 | 0.00E+00 | 2444 | 0x060494000 | 100.00  | 0.00E+00  | 2444 | 3   | NA | Japonya |
| maker-4-augustin-285.19-mb1-1 | 4 | 0x48f896040454-01-102 | 100.00 | 0.00E+00 | 2544 | 0x060496000 | 100.00  | 0.00E+00  | 2548 | 412 | NA | Japonya |
| maker-4-augustin-285.19-mb1-1 | 4 | 0x48f896040456-01-102 | 100.00 | 0.00E+00 | 1413 | 0x060498000 | 99.87   | 0.00E+00  | 1416 | 3   | NA | India   |
| maker-4-augustin-285.19-mb1-1 | 4 | 0x48f896040458-01-102 | 99.83  | 0.00E+00 | 1444 | 0x060499000 | 100.00  | 0.00E+00  | 1444 | 2   | NA | Japonya |
| maker-4-augustin-285.19-mb1-1 | 4 | 0x48f896040460-01-102 | 100.00 | 0.00E+00 | 7468 | 0x060500000 | 99.48   | 8.18E-139 | 491  | 25  | NA | India   |
| maker-4-augustin-285.19-mb1-1 | 4 | 0x48f896040462-01-102 | 99.48  | 0.00E+00 | 964  | 0x060502000 | 99.88   | 0.00E+00  | 964  | 15  | NA | Japonya |
| maker-4-augustin-285.19-mb1-1 | 4 | 0x48f896040464-01-102 | 74.79  | 0.00E+00 | 761  | 0x060504000 | 97.88   | 0.00E+00  | 706  | 55  | NA | Japonya |
| maker-4-augustin-285.19-mb1-1 | 4 | 0x48f896040466-01-102 | 100.00 | 0.00E+00 | 2289 | 0x060506000 | 99.92   | 0.00E+00  | 2289 | 4   | NA | Japonya |
| maker-4-augustin-285.19-mb1-1 | 4 | 0x48f896040468-01-102 | 100.00 | 0.00E+00 | 1849 | 0x060508000 | 100.00  | 0.00E+00  | 1849 | 0   | NA | Japonya |
| maker-4-augustin-285.19-mb1-1 | 4 | 0x48f896040470-01-102 | 99.92  | 0.00E+00 | 2296 | 0x060510000 | 100.00  | 0.00E+00  | 2299 | 4   | NA | Japonya |
| maker-4-augustin-285.19-mb1-1 | 4 | 0x48f896040472-01-102 | 100.00 | 0.00E+00 | 1389 | 0x060512000 | 100.00  | 0.00E+00  | 1389 | 0   | NA | Japonya |
| maker-4-augustin-285.19-mb1-1 | 4 | 0x48f896040474-01-102 | 100.00 | 0.00E+00 | 1530 | 0x060514000 | 100.00  | 0.00E+00  | 1530 | 0   | NA | Japonya |
| maker-4-augustin-285.19-mb1-1 | 4 | 0x48f896040476-01-102 | 99.75  | 0.00E+00 | 1053 | 0x060516000 | 99.81   | 0.00E+00  | 1053 | 1   | NA | India   |
| maker-4-augustin-285.19-mb1-1 | 4 | 0x48f896040478-01-102 | 100.00 | 0.00E+00 | 3205 | 0x060522000 | 99.82</ |           |      |     |    |         |

[illegible]

[illegible]



[illegible]









[illegible]







[illegible]

[illegible]

[illegible]



[illegible]

[illegible]



[illegible]





|                                   |     |                         |        |          |       |              |       |          |       |      |    |        |
|-----------------------------------|-----|-------------------------|--------|----------|-------|--------------|-------|----------|-------|------|----|--------|
| maker 7 augustus 201 24.01 mBnA-1 | 7   | D8A49B027143480A.05.102 | 100.00 | 0.00E+00 | 15007 | D26D97051000 | 90.00 | 0.00E+00 | 15007 | 0    | NA | NA     |
| maker 7 augustus 201 24.01 mBnA-1 | 7   | D8A49B027143480A.05.102 | 100.00 | 0.00E+00 | 17599 | D26D97051000 | 90.00 | 0.00E+00 | 15007 | 0    | NA | NA     |
| maker 7 augustus 201 24.01 mBnA-1 | 7   | D8A49B027143480A.05.102 | 99.76  | 0.00E+00 | 808   | D26D97051000 | 90.00 | 0.00E+00 | 808   | 0    | NA | NA     |
| maker 7 augustus 201 24.01 mBnA-1 | 7   | D8A49B027143480A.05.102 | 99.76  | 0.00E+00 | 1217  | D26D97051000 | 90.00 | 0.00E+00 | 1217  | 0    | NA | NA     |
| maker 7 augustus 201 24.01 mBnA-1 | 7   | D8A49B027143480A.05.102 | 99.47  | 0.00E+00 | 1339  | D26D97051000 | 90.00 | 0.00E+00 | 1302  | -137 | NA | indica |
| maker 7 augustus 201 24.01 mBnA-1 | 7   | D8A49B027143480A.05.102 | 99.28  | 0.00E+00 | 1718  | D26D97051000 | 90.00 | 0.00E+00 | 1801  | 83   | NA | indica |
| maker 7 augustus 201 24.01 mBnA-1 | 7   | D8A49B027143480A.05.102 | 99.63  | 0.00E+00 | 1114  | D26D97051000 | 90.00 | 0.00E+00 | 1128  | 14   | NA | indica |
| maker 7 augustus 201 24.01 mBnA-1 | 7   | D8A49B027143480A.05.102 | 99.63  | 0.00E+00 | 1449  | D26D97051000 | 90.00 | 0.00E+00 | 1500  | 50   | NA | indica |
| maker 7 augustus 201 24.01 mBnA-1 | 7   | D8A49B027143480A.05.102 | 99.90  | 0.00E+00 | 1887  | D26D97051000 | 90.00 | 0.00E+00 | 1887  | 0    | NA | indica |
| maker 7 augustus 201 24.01 mBnA-1 | 7   | D8A49B027143480A.05.102 | 99.70  | 0.00E+00 | 1981  | D26D97051000 | 90.00 | 0.00E+00 | 1983  | -18  | NA | indica |
| maker 7 augustus 201 24.01 mBnA-1 | 7   | D8A49B027143480A.05.102 | 99.70  | 0.00E+00 | 2000  | D26D97051000 | 90.00 | 0.00E+00 | 2000  | 0    | NA | indica |
| maker 7 augustus 201 24.01 mBnA-1 | 7   | D8A49B027143480A.05.102 | 99.87  | 0.00E+00 | 2738  | D26D97051000 | 90.00 | 0.00E+00 | 2739  | 4    | NA | indica |
| maker 7 augustus 201 24.01 mBnA-1 | 7   | D8A49B027143480A.05.102 | 99.83  | 0.00E+00 | 1785  | D26D97051000 | 90.00 | 0.00E+00 | 1785  | 0    | NA | indica |
| maker 7 augustus 201 24.01 mBnA-1 | 7   | D8A49B027143480A.05.102 | 99.48  | 0.00E+00 | 3317  | D26D97051000 | 90.00 | 0.00E+00 | 3351  | 34   | NA | indica |
| maker 7 augustus 201 24.01 mBnA-1 | 7   | D8A49B027143480A.05.102 | 99.53  | 0.00E+00 | 1678  | D26D97051000 | 90.00 | 0.00E+00 | 1678  | 0    | NA | indica |
| maker 7 augustus 201 24.01 mBnA-1 | 7   | D8A49B027143480A.05.102 | 99.92  | 0.00E+00 | 2383  | D26D97051000 | 90.00 | 0.00E+00 | 2399  | 116  | NA | indica |
| maker 7 augustus 201 24.01 mBnA-1 | 7   | D8A49B027143480A.05.102 | 99.09  | 0.00E+00 | 2311  | D26D97051000 | 90.00 | 0.00E+00 | 2311  | 0    | NA | indica |
| maker 7 augustus 201 24.01 mBnA-1 | 7   | D8A49B027143480A.05.102 | 99.94  | 0.00E+00 | 2252  | D26D97051000 | 90.00 | 0.00E+00 | 2252  | 0    | NA | indica |
| maker 7 augustus 201 24.01 mBnA-1 | 7   | D8A49B027143480A.05.102 | 99.94  | 0.00E+00 | 1738  | D26D97051000 | 90.00 | 0.00E+00 | 1835  | 97   | NA | indica |
| maker 7 augustus 201 24.01 mBnA-1 | 7   | D8A49B027143480A.05.102 | 99.27  | 0.00E+00 | 1718  | D26D97051000 | 90.00 | 0.00E+00 | 1824  | 106  | NA | indica |
| maker 7 augustus 201 24.01 mBnA-1 | 7   | D8A49B027143480A.05.102 | 99.28  | 7.27E-18 | 489   | D26D97051000 | 90.00 | 4.88E-14 | 499   | 10   | NA | indica |
| maker 7 augustus 201 24.01 mBnA-1 | 7   | D8A49B027143480A.05.102 | 99.94  | 0.00E+00 | 1613  | D26D97051000 | 90.00 | 0.00E+00 | 1613  | 0    | NA | indica |
| maker 7 augustus 201 24.01 mBnA-1 | 7   | D8A49B027143480A.05.102 | 99.49  | 0.00E+00 | 704   | D26D97051000 | 90.00 | 0.00E+00 | 1287  | 585  | NA | indica |
| maker 7 augustus 201 24.01 mBnA-1 | 7   | D8A49B027143480A.05.102 | 99.84  | 0.00E+00 | 2500  | D26D97051000 | 90.00 | 0.00E+00 | 2500  | 0    | NA | indica |
| maker 7 augustus 201 24.01 mBnA-1 | 7   | D8A49B027143480A.05.102 | 99.71  | 0.00E+00 | 3062  | D26D97051000 | 90.00 | 0.00E+00 | 3062  | 0    | NA | indica |
| maker 7 augustus 201 24.01 mBnA-1 | 7</ |                         |        |          |       |              |       |          |       |      |    |        |

[illegible]

[illegible]



[illegible]

[illegible]

|                                      |   |                         |       |          |      |          |       |          |      |     |     |          |  |
|--------------------------------------|---|-------------------------|-------|----------|------|----------|-------|----------|------|-----|-----|----------|--|
| maker 8-augustin-gene-221.32-nbRNA-1 | 8 | 0484R08R01414460.01.T01 | 95.86 | 0.00E+00 | 1666 | 0.00E+00 | 99.21 | 0.00E+00 | 1781 | 115 | NA  | NA       |  |
| maker 8-augustin-gene-221.33-nbRNA-1 | 8 | 0484R08R01414460.01.T01 | 95.86 | 0.00E+00 | 1380 | 0.00E+00 | 99.21 | 0.00E+00 | 1981 | 114 | 665 | Japanica |  |
| maker 8-augustin-gene-221.34-nbRNA-1 | 8 | 0484R08R01414460.01.T01 | 96.14 | 0.00E+00 | 1939 | 0.00E+00 | 99.74 | 0.00E+00 | 1814 | 123 | NA  | India    |  |
| maker 8-augustin-gene-224.43-nbRNA-1 | 8 | 0484R08R01414460.01.T01 | 95.86 | 0.00E+00 | 1008 | 0.00E+00 | 99.74 | 0.00E+00 | 2008 | 200 | NA  | NA       |  |
| maker 8-augustin-gene-224.44-nbRNA-1 | 8 | 0484R08R01414460.01.T01 | 95.74 | 0.00E+00 | 1008 | 0.00E+00 | 99.74 | 0.00E+00 | 1988 | 142 | NA  | India    |  |
| maker 8-augustin-gene-225.48-nbRNA-1 | 8 | 0484R08R01414460.01.T01 | 99.73 | 0.00E+00 | 1317 | 0.00E+00 | 99.73 | 0.00E+00 | 1700 | 27  | NA  | India    |  |
| maker 8-augustin-gene-225.49-nbRNA-1 | 8 | 0484R08R01414460.01.T01 | 99.73 | 0.00E+00 | 1008 | 0.00E+00 | 99.73 | 0.00E+00 | 1971 | 4   | NA  | India    |  |
| maker 8-augustin-gene-225.49-nbRNA-1 | 8 | 0484R08R01414460.01.T01 | 99.73 | 0.00E+00 | 1317 | 0.00E+00 | 99.73 | 0.00E+00 | 1680 | 4   | NA  | NA       |  |
| maker 8-augustin-gene-226.43-nbRNA-1 | 8 | 0484R08R01414460.01.T01 | 99.73 | 0.00E+00 | 1008 | 0.00E+00 | 99.73 | 0.00E+00 | 1971 | 38  | NA  | India    |  |
| maker 8-augustin-gene-226.44-nbRNA-1 | 8 | 0484R08R01414460.01.T01 | 99.89 | 0.00E+00 | 1919 | 0.00E+00 | 99.89 | 0.00E+00 | 1904 | 147 | NA  | India    |  |
| maker 8-augustin-gene-227.03-nbRNA-1 | 8 | 0484R08R01414460.01.T01 | 99.89 | 0.00E+00 | 2397 | 0.00E+00 | 99.89 | 0.00E+00 | 2042 | 1   | NA  | Japanica |  |
| maker 8-augustin-gene-227.04-nbRNA-1 | 8 | 0484R08R01414460.01.T01 | 99.89 | 0.00E+00 | 972  | 0.00E+00 | 99.89 | 0.00E+00 | 1971 | 2   | NA  | India    |  |
| maker 8-augustin-gene-228.34-nbRNA-1 | 8 | 0484R08R01414460.01.T01 | 99.73 | 0.00E+00 | 1317 | 0.00E+00 | 99.73 | 0.00E+00 | 2761 | 5   | NA  | India    |  |
| maker 8-augustin-gene-228.35-nbRNA-1 | 8 | 0484R08R01414460.01.T01 | 99.73 | 0.00E+00 | 1008 | 0.00E+00 | 99.73 | 0.00E+00 | 1971 | 0   | NA  | India    |  |
| maker 8-augustin-gene-228.40-nbRNA-1 | 8 | 0484R08R01414460.01.T01 | 99.73 | 0.00E+00 | 2304 | 0.00E+00 | 99.73 | 0.00E+00 | 2761 | 9   | NA  | India    |  |
| maker 8-augustin-gene-228.41-nbRNA-1 | 8 | 0484R08R01414460.01.T01 | 99.73 | 0.00E+00 | 1008 | 0.00E+00 | 99.73 | 0.00E+00 | 1971 | 0   | NA  | India    |  |
| maker 8-augustin-gene-228.42-nbRNA-1 | 8 | 0484R08R01414460.01.T01 | 99.73 | 0.00E+00 | 1317 | 0.00E+00 | 99.73 | 0.00E+00 | 1971 | 0   | NA  | India    |  |
| maker 8-augustin-gene-228.43-nbRNA-1 | 8 | 0484R08R01414460.01.T01 | 99.73 | 0.00E+00 | 1008 | 0.00E+00 | 99.73 | 0.00E+00 | 1971 | 0   | NA  | India    |  |
| maker 8-augustin-gene-228.44-nbRNA-1 | 8 | 0484R08R01414460.01.T01 | 99.73 | 0.00E+00 | 1008 | 0.00E+00 | 99.73 | 0.00E+00 | 1971 | 0   | NA  | India    |  |
| maker 8-augustin-gene-228.45-nbRNA-1 | 8 | 0484R08R01414460.01.T01 | 99.73 | 0.00E+00 | 1008 | 0.00E+00 | 99.73 | 0.00E+00 | 1971 | 0   | NA  | India    |  |
| maker 8-augustin-gene-228.46-nbRNA-1 | 8 | 0484R08R01414460.01.T01 | 99.73 | 0.00E+00 | 1008 | 0.00E+00 | 99.73 | 0.00E+00 | 1971 | 0   | NA  | India    |  |
| maker 8-augustin-gene-228.47-nbRNA-1 | 8 | 0484R08R01414460.01.T01 | 99.73 | 0.00E+00 | 1008 | 0.00E+00 | 99.73 | 0.00E+00 | 1971 | 0   | NA  | India    |  |
| maker 8-augustin-gene-228.48-nbRNA-1 | 8 | 0484R08R01414460.01.T01 | 99.73 | 0.00E+00 | 1008 | 0.00E+00 | 99.73 | 0.00E+00 | 1971 | 0   | NA  | India    |  |
| maker 8-augustin-gene-228.49-nbRNA-1 | 8 | 0484R08R01414460.01.T01 | 99.73 | 0.00E+00 | 1008 | 0.00E+00 | 99.73 | 0.00E+00 | 1971 | 0   | NA  | India    |  |
| maker 8-augustin-gene-228.50-nbRNA-1 | 8 | 0484R08R01414460.01.T01 | 99.73 | 0.00E+00 | 1008 | 0.00E+00 | 99.73 | 0.00E+00 | 1971 | 0   | NA  | India    |  |
| maker 8-augustin-gene-228.51-nbRNA-1 | 8 | 0484R08R01414460.       |       |          |      |          |       |          |      |     |     |          |  |







[illegible]

|                                     |   |                        |        |          |      |             |        |          |      |     |          |          |
|-------------------------------------|---|------------------------|--------|----------|------|-------------|--------|----------|------|-----|----------|----------|
| augustinus 9 processed 194.10 mnm-1 | 9 | DakR0090176320.01.101  | 98.70  | 0.00E+00 | 3293 | Ov0p0040000 | 100.00 | 0.00E+00 | 2300 | 27  | NA       | apocrita |
| augustinus 9 processed 197.20 mnm-1 | 9 | DakR0090176320.01.101  | 98.84  | 0.00E+00 | 3065 | Ov0p0124200 | 99.14  | 0.00E+00 | 3096 | 31  | NA       | apocrita |
| augustinus 9 processed 198.10 mnm-1 | 9 | DakR0090176320.01.101  | 99.00  | 0.00E+00 | 3000 | Ov0p0124200 | 99.00  | 0.00E+00 | 3137 | 30  | NA       | apocrita |
| augustinus 9 processed 207.21 mnm-1 | 9 | DakR00901763180.01.101 | 99.39  | 0.00E+00 | 1381 | Ov0p0134800 | 99.39  | 0.00E+00 | 1381 | 0   | NA       | NA       |
| augustinus 9 processed 214.14 mnm-1 | 9 | DakR0090176320.01.101  | 99.48  | 0.00E+00 | 1862 | Ov0p0134800 | 99.48  | 0.00E+00 | 1862 | 0   | NA       | apocrita |
| augustinus 9 processed 214.19 mnm-1 | 9 | DakR0090176320.01.101  | 99.58  | 0.00E+00 | 2228 | Ov0p0140500 | 99.58  | 0.00E+00 | 2228 | 18  | NA       | apocrita |
| augustinus 9 processed 214.52 mnm-1 | 9 | DakR0090176320.01.101  | 98.82  | 0.00E+00 | 1892 | Ov0p0140800 | 98.82  | 0.00E+00 | 1744 | 282 | apocrita | apocrita |
| augustinus 9 processed 214.55 mnm-1 | 9 | DakR0090176320.01.101  | 99.00  | 0.00E+00 | 1892 | Ov0p0140800 | 99.00  | 0.00E+00 | 1744 | 282 | apocrita | apocrita |
| augustinus 9 processed 215.21 mnm-1 | 9 | DakR0090176320.01.101  | 99.44  | 0.00E+00 | 2799 | Ov0p0140800 | 99.44  | 0.00E+00 | 2799 | 54  | NA       | NA       |
| augustinus 9 processed 215.37 mnm-1 | 9 | DakR0090176320.01.101  | 99.44  | 0.00E+00 | 2799 | Ov0p0140800 | 99.44  | 0.00E+00 | 2799 | 54  | NA       | apocrita |
| augustinus 9 processed 217.23 mnm-1 | 9 | DakR0090176320.01.101  | 100.00 | 0.00E+00 | 793  | Ov0p0142800 | 100.00 | 1.92E+29 | 793  | 325 | indica   | NA       |
| augustinus 9 processed 217.46 mnm-1 | 9 | DakR0090176320.01.101  | 100.00 | 0.00E+00 | 789  | Ov0p0142800 | 100.00 | 0.00E+00 | 789  | 0   | NA       | NA       |
| augustinus 9 processed 217.74 mnm-1 | 9 | DakR0090176320.01.101  | 100.00 | 0.00E+00 | 789  | Ov0p0142800 | 100.00 | 0.00E+00 | 789  | 0   | NA       | NA       |
| augustinus 9 processed 217.79 mnm-1 | 9 | DakR0090176320.01.101  | 100.00 | 0.00E+00 | 789  | Ov0p0142800 | 100.00 | 0.00E+00 | 789  | 0   | NA       | indica   |
| augustinus 9 processed 217.80 mnm-1 | 9 | DakR0090176320.01.101  | 100.00 | 0.00E+00 | 789  | Ov0p0142800 | 100.00 | 0.00E+00 | 789  | 0   | NA       | indica   |
| augustinus 9 processed 218.77 mnm-1 | 9 | DakR0090176320.01.101  | 100.00 | 0.00E+00 | 664  | Ov0p0151000 | 100.00 | 0.00E+00 | 664  | 298 | apocrita | apocrita |
| augustinus 9 processed 219.21 mnm-1 | 9 | DakR0090176320.01.101  | 100.00 | 0.00E+00 | 1862 | Ov0p0151000 | 100.00 | 0.00E+00 | 1862 | 0   | NA       | apocrita |
| augustinus 9 processed 221.46 mnm-1 | 9 | DakR0090176320.01.101  | 99.84  | 0.00E+00 | 1889 | Ov0p0154200 | 99.84  | 0.00E+00 | 1894 | 5   | NA       | apocrita |
| augustinus 9 processed 221.52 mnm-1 | 9 | DakR0090176320.01.101  | 99.74  | 0.00E+00 | 1889 | Ov0p0154200 | 99.74  | 0.00E+00 | 1894 | 5   | NA       | apocrita |
| augustinus 9 processed 221.53 mnm-1 | 9 | DakR0090176320.01.101  | 99.84  | 0.00E+00 | 2515 | Ov0p0154200 | 99.84  | 0.00E+00 | 2504 | 237 | indica   | NA       |
| augustinus 9 processed 222.33 mnm-1 | 9 | DakR0090176320.01.101  | 98.47  | 0.00E+00 | 1928 | Ov0p0159100 | 98.47  | 0.00E+00 | 2004 | 76  | NA       | apocrita |
| augustinus 9 processed 224.18 mnm-1 | 9 | DakR0090176320.01.101  | 99.20  | 0.00E+00 | 1928 | Ov0p0159100 | 99.20  | 0.00E+00 | 2004 | 76  | NA       | apocrita |
| augustinus 9 processed 224.18 mnm-1 | 9 | DakR0090176320.01.101  | 98.47  | 7.88E-83 | 344  | Ov0p0160300 | 99.45  | 5.07E-88 | 325  | 9   | NA       | apocrita |
| augustinus 9 processed 227.14 mnm-1 | 9 | DakR0090176320.01.101  | 99.74  | 0.00E+00 | 2148 | Ov0p0164200 | 99.74  | 0.00E+00 | 2156 | 8   | indica   | NA       |
| augustinus 9 processed 227.42 mnm-1 | 9 | DakR0090176320.01.101  | 99.74  | 0.00E+00 | 2148 | Ov0p0164200 | 99.74  | 0.00E+00 | 2156 | 8   | indica   | NA       |
| augustinus 9 processed 228.49 mnm-1 | 9 | DakR0090176320.01.101  | 99.74  | 0.00E+00 | 1795 | Ov0p0172800 | 99.74  | 0.00E+00 | 1795 | 437 | indica   | NA       |
| augustinus 9 processed 228.93 mnm-1 | 9 | DakR0090176320.01.101  |        |          |      |             |        |          |      |     |          |          |

[illegible]





[illegible]





[illegible]





[illegible]





|                                          |    |                         |       |           |      |              |        |           |      |      |        |          |
|------------------------------------------|----|-------------------------|-------|-----------|------|--------------|--------|-----------|------|------|--------|----------|
| augustus 19 processed gene 210.15-mRNA-1 | 13 | D8ARRP121277000.01.T01  | 10000 | 0.00E+00  | 2687 | O12G01871000 | 100.00 | 0.00E+00  | 2687 | 0    | NA     | indica   |
| augustus 19 processed gene 210.16-mRNA-1 | 13 | D8ARRP121279000.01.T02  | 10000 | 1.68E-14  | 611  | O12G01871000 | 99.71  | 1.3E-173  | 610  | 0    | NA     | indica   |
| augustus 19 processed gene 211.1-mRNA-1  | 13 | D8ARRP121279100.01.T01  | 10000 | 0.00E+00  | 1336 | O12G01871000 | 99.83  | 0.00E+00  | 1336 | 0    | NA     | indica   |
| augustus 19 processed gene 212.2-mRNA-1  | 13 | D8ARRP121277400.01.T01  | 10000 | 0.00E+00  | 1490 | O12G01871000 | 100.00 | 0.00E+00  | 1497 | -443 | indica | NA       |
| augustus 19 processed gene 213.1-mRNA-1  | 13 | D8ARRP121277600.01.T01  | 10000 | 0.00E+00  | 1490 | O12G01871000 | 100.00 | 0.00E+00  | 1497 | -443 | indica | NA       |
| augustus 19 processed gene 215.1-mRNA-1  | 13 | D8ARRP121277100.01.T01  | 10000 | 0.00E+00  | 1494 | O12G01871000 | 100.00 | 0.00E+00  | 1544 | 0    | NA     | japonica |
| augustus 19 processed gene 22.0-mRNA-1   | 13 | D8ARRP122291100.01.T01  | 97.82 | 0.00E+00  | 1314 | O12G0144400  | 99.74  | 0.00E+00  | 1384 | -132 | indica | japonica |
| augustus 19 processed gene 22.1-mRNA-1   | 13 | D8ARRP122291200.01.T01  | 97.82 | 0.00E+00  | 1314 | O12G0144400  | 99.74  | 0.00E+00  | 1384 | -132 | indica | japonica |
| augustus 19 processed gene 22.15-mRNA-1  | 13 | D8ARRP122291300.01.T01  | 97.82 | 1.94E-158 | 139  | O12G0144400  | 99.73  | 1.38E-148 | 135  | 0    | NA     | indica   |
| augustus 19 processed gene 22.15-mRNA-1  | 13 | D8ARRP122291400.01.T01  | 97.82 | 2.40E-170 | 139  | O12G0144400  | 99.73  | 1.38E-148 | 135  | 0    | NA     | indica   |
| augustus 19 processed gene 22.19-mRNA-1  | 13 | D8ARRP1212811400.01.T01 | 98.75 | 0.00E+00  | 2156 | O12G0201300  | 99.86  | 0.00E+00  | 2158 | 0    | indica | japonica |
| augustus 19 processed gene 22.23-mRNA-1  | 13 | D8ARRP1212812400.01.T01 | 98.75 | 0.00E+00  | 2156 | O12G0201300  | 99.86  | 0.00E+00  | 2158 | 0    | indica | japonica |
| augustus 19 processed gene 22.23-mRNA-1  | 13 | D8ARRP1212813400.01.T01 | 98.75 | 0.00E+00  | 2156 | O12G0201300  | 99.86  | 0.00E+00  | 2158 | 0    | indica | japonica |
| augustus 19 processed gene 22.23-mRNA-1  | 13 | D8ARRP1212814400.01.T01 | 98.75 | 0.00E+00  | 2156 | O12G0201300  | 99.86  | 0.00E+00  | 2158 | 0    | indica | japonica |
| augustus 19 processed gene 22.23-mRNA-1  | 13 | D8ARRP1212815400.01.T01 | 98.75 | 0.00E+00  | 2156 | O12G0201300  | 99.86  | 0.00E+00  | 2158 | 0    | indica | japonica |
| augustus 19 processed gene 22.23-mRNA-1  | 13 | D8ARRP1212816400.01.T01 | 98.75 | 0.00E+00  | 2156 | O12G0201300  | 99.86  | 0.00E+00  | 2158 | 0    | indica | japonica |
| augustus 19 processed gene 22.23-mRNA-1  | 13 | D8ARRP1212817400.01.T01 | 98.75 | 0.00E+00  | 2156 | O12G0201300  | 99.86  | 0.00E+00  | 2158 | 0    | indica | japonica |
| augustus 19 processed gene 22.23-mRNA-1  | 13 | D8ARRP1212818400.01.T01 | 98.75 | 0.00E+00  | 2156 | O12G0201300  | 99.86  | 0.00E+00  | 2158 | 0    | indica | japonica |
| augustus 19 processed gene 22.23-mRNA-1  | 13 | D8ARRP1212819400.01.T01 | 98.75 | 0.00E+00  | 2156 | O12G0201300  | 99.86  | 0.00E+00  | 2158 | 0    | indica | japonica |
| augustus 19 processed gene 22.23-mRNA-1  | 13 | D8ARRP1212820400.01.T01 | 98.75 | 0.00E+00  | 2156 | O12G0201300  | 99.86  | 0.00E+00  | 2158 | 0    | indica | japonica |
| augustus 19 processed gene 22.23-mRNA-1  | 13 | D8ARRP1212821400.01.T01 | 98.75 | 0.00E+00  | 2156 | O12G0201300  | 99.86  | 0.00E+00  | 2158 | 0    | indica | japonica |
| augustus 19 processed gene 22.23-mRNA-1  | 13 | D8ARRP1212822400.01.T01 | 98.75 | 0.00E+00  | 2156 | O12G0201300  | 99.86  | 0.00E+00  | 2158 | 0    | indica | japonica |
| augustus 19 processed gene 22.23-mRNA-1  | 13 | D8ARRP1212823400.01.T01 | 98.75 | 0.00E+00  | 2156 | O12G0201300  | 99.86  | 0.00E+00  | 2158 | 0    | indica | japonica |
| augustus 19 processed gene 22.23-mRNA-1  | 13 | D8ARRP1212824400.01.T01 | 98.75 | 0.00E+00  | 2156 | O12G0201300  | 99.86  | 0.00E+00  | 2158 | 0    | indica | japonica |
| augustus 19 processed gene 22.23-mRNA-1  | 13 | D8ARRP1212825400.01.T01 | 98.75 | 0.00E+00  | 2156 | O12G0201300  | 99.86  | 0.00E+00  | 2158 | 0    | indica | japonica |
| augustus 19 processed gene 22.23-mRNA-1  | 13 | D8ARRP1212826400.01.T01 | 98.75 | 0.00E+00  | 2156 | O12G0201300  | 99.86  | 0.00E+00  | 2158 | 0    | indica | japonica |
| augustus 19 processed gene 22.23-mRNA-1  | 13 | D8ARRP1212              |       |           |      |              |        |           |      |      |        |          |



|                                      |    |                     |       |          |      |            |        |          |      |      |       |           |  |
|--------------------------------------|----|---------------------|-------|----------|------|------------|--------|----------|------|------|-------|-----------|--|
| maker 12 aquagets-gene-14.18-nr4-nr1 | 12 | 00486R1212089000.01 | 96.88 | 0.00E+00 | 2358 | 0116133500 | 94.78  | 0.00E+00 | 2294 | -95  | NA    | Iaportica |  |
| maker 12 aquagets-gene-14.28-nr4-nr1 | 12 | 00486R1212089000.01 | 97.30 | 0.00E+00 | 2359 | 0116133800 | 97.92  | 0.00E+00 | 2340 | -97  | NA    | Iaportica |  |
| maker 12 aquagets-gene-14.38-nr4-nr1 | 12 | 00486R1212089000.01 | 96.88 | 0.00E+00 | 2358 | 0116133500 | 94.78  | 0.00E+00 | 2294 | -95  | NA    | Iaportica |  |
| maker 12 aquagets-gene-14.47-nr4-nr1 | 12 | 00486R1212089000.01 | 96.79 | 0.00E+00 | 2358 | 0086130000 | 94.19  | 0.00E+00 | 2189 | -243 | India | Iaportica |  |
| maker 12 aquagets-gene-14.53-nr4-nr1 | 12 | 00486R1212089000.01 | 96.89 | 0.00E+00 | 2358 | 0116133900 | 96.35  | 0.00E+00 | 2403 | -97  | NA    | Iaportica |  |
| maker 12 aquagets-gene-14.6-nr4-nr1  | 12 | 00486R1212089000.01 | 96.88 | 0.00E+00 | 2358 | 0116133800 | 97.92  | 0.00E+00 | 2340 | -97  | NA    | Iaportica |  |
| maker 12 aquagets-gene-14.65-nr4-nr1 | 12 | 00486R1212151000.01 | 99.15 | 0.00E+00 | 1533 | 0116244800 | 100.00 | 0.00E+00 | 1513 | -22  | NA    | Iaportica |  |
| maker 12 aquagets-gene-14.68-nr4-nr1 | 12 | 00486R1212151000.01 | 99.15 | 0.00E+00 | 1533 | 0116244800 | 100.00 | 0.00E+00 | 1513 | -22  | NA    | Iaportica |  |
| maker 12 aquagets-gene-14.73-nr4-nr1 | 12 | 00486R1212151000.01 | 99.15 | 0.00E+00 | 1533 | 0116244800 | 100.00 | 0.00E+00 | 1513 | -22  | NA    | Iaportica |  |
| maker 12 aquagets-gene-14.78-nr4-nr1 | 12 | 00486R1212151000.01 | 99.15 | 0.00E+00 | 1533 | 0116244800 | 100.00 | 0.00E+00 | 1513 | -22  | NA    | Iaportica |  |
| maker 12 aquagets-gene-14.83-nr4-nr1 | 12 | 00486R1212151000.01 | 99.15 | 0.00E+00 | 1533 | 0116244800 | 100.00 | 0.00E+00 | 1513 | -22  | NA    | Iaportica |  |
| maker 12 aquagets-gene-14.87-nr4-nr1 | 12 | 00486R1212151000.01 | 99.15 | 0.00E+00 | 1533 | 0116244800 | 100.00 | 0.00E+00 | 1513 | -22  | NA    | Iaportica |  |
| maker 12 aquagets-gene-14.93-nr4-nr1 | 12 | 00486R1212151000.01 | 99.15 | 0.00E+00 | 1533 | 0116244800 | 100.00 | 0.00E+00 | 1513 | -22  | NA    | Iaportica |  |
| maker 12 aquagets-gene-14.97-nr4-nr1 | 12 | 00486R1212151000.01 | 99.15 | 0.00E+00 | 1533 | 0116244800 | 100.00 | 0.00E+00 | 1513 | -22  | NA    | Iaportica |  |
| maker 12 aquagets-gene-15.03-nr4-nr1 | 12 | 00486R1212151000.01 | 99.15 | 0.00E+00 | 1533 | 0116244800 | 100.00 | 0.00E+00 | 1513 | -22  | NA    | Iaportica |  |
| maker 12 aquagets-gene-15.08-nr4-nr1 | 12 | 00486R1212151000.01 | 99.15 | 0.00E+00 | 1533 | 0116244800 | 100.00 | 0.00E+00 | 1513 | -22  | NA    | Iaportica |  |
| maker 12 aquagets-gene-15.14-nr4-nr1 | 12 | 00486R1212151000.01 | 99.15 | 0.00E+00 | 1533 | 0116244800 | 100.00 | 0.00E+00 | 1513 | -22  | NA    | Iaportica |  |
| maker 12 aquagets-gene-15.19-nr4-nr1 | 12 | 00486R1212151000.01 | 99.15 | 0.00E+00 | 1533 | 0116244800 | 100.00 | 0.00E+00 | 1513 | -22  | NA    | Iaportica |  |
| maker 12 aquagets-gene-15.25-nr4-nr1 | 12 | 00486R1212151000.01 | 99.15 | 0.00E+00 | 1533 | 0116244800 | 100.00 | 0.00E+00 | 1513 | -22  | NA    | Iaportica |  |
| maker 12 aquagets-gene-15.31-nr4-nr1 | 12 | 00486R1212151000.01 | 99.15 | 0.00E+00 | 1533 | 0116244800 | 100.00 | 0.00E+00 | 1513 | -22  | NA    | Iaportica |  |
| maker 12 aquagets-gene-15.36-nr4-nr1 | 12 | 00486R1212151000.01 | 99.15 | 0.00E+00 | 1533 | 0116244800 | 100.00 | 0.00E+00 | 1513 | -22  | NA    | Iaportica |  |
| maker 12 aquagets-gene-15.42-nr4-nr1 | 12 | 00486R1212151000.01 | 99.15 | 0.00E+00 | 1533 | 0116244800 | 100.00 | 0.00E+00 | 1513 | -22  | NA    | Iaportica |  |
| maker 12 aquagets-gene-15.48-nr4-nr1 | 12 | 00486R1212151000.01 | 99.15 | 0.00E+00 | 1533 | 0116244800 | 100.00 | 0.00E+00 | 1513 | -22  | NA    | Iaportica |  |
| maker 12 aquagets-gene-15.54-nr4-nr1 | 12 | 00486R1212151000.01 | 99.15 | 0.00E+00 | 1533 | 0116244800 | 100.00 | 0.00E+00 | 1513 | -22  | NA    | Iaportica |  |
| maker 12 aquagets-gene-15.6-nr4-nr1  | 12 | 00486R1212151000.01 | 99.15 | 0.00E+00 | 1533 | 0116244800 | 100.00 |          |      |      |       |           |  |

[illegible]

[illegible]

|                                     |    |                          |        |           |      |              |        |           |      |      |          |          |              |
|-------------------------------------|----|--------------------------|--------|-----------|------|--------------|--------|-----------|------|------|----------|----------|--------------|
| maker-12-augustus-gene-9-23-mRNA-1  | 12 | DsR4986.111931300.01.T01 | 95.77  | 0.00E+00  | 1358 | Os12g0119780 | 94.49  | 0.00E+00  | 1070 | 468  | indica   | japonica |              |
| maker-12-augustus-gene-9-23-mRNA-1  | 12 | DsR4986.120813200.01.T01 | 100.00 | 1.82E+19  | 623  | Os12g0119780 | 100.00 | 2.03E+19  | 423  | 0    | NA       | japonica |              |
| maker-12-augustus-gene-9-27-mRNA-1  | 12 | DsR4986.12087000.01.T01  | 99.92  | 0.00E+00  | 4677 | Os11g0117700 | 97.84  | 0.00E+00  | 4440 | 247  | NA       | japonica |              |
| maker-12-augustus-gene-9-29-mRNA-1  | 12 | DsR4986.120836300.01.T01 | 99.91  | 0.00E+00  | 3568 | Os12g0117200 | 100.00 | 0.00E+00  | 1704 | 1361 | NA       | japonica |              |
| maker-12-augustus-gene-9-32-mRNA-1  | 12 | DsR4986.12084900.01.T01  | 99.90  | 0.00E+00  | 3519 | Os12g0117600 | 100.00 | 0.00E+00  | 3528 | 9    | NA       | japonica |              |
| maker-12-augustus-gene-9-34-mRNA-1  | 12 | DsR4986.111931300.01.T01 | 99.85  | 0.00E+00  | 1347 | Os12g0117800 | 100.00 | 0.00E+00  | 1561 | 14   | NA       | japonica |              |
| maker-12-augustus-gene-9-35-mRNA-1  | 12 | DsR4986.12084100.01.T01  | 94.76  | 0.00E+00  | 1893 | Os11g0118800 | 93.43  | 0.00E+00  | 1804 | 89   | NA       | japonica |              |
| maker-12-augustus-gene-9-4-mRNA-1   | 12 | DsR4986.120836400.01.T01 | 100.00 | 3.08E+113 | 408  | Os12g0117200 | 100.00 | 1.04E+113 | 408  | 0    | NA       | japonica |              |
| maker-12-augustus-gene-9-8-mRNA-1   | 12 | DsR4986.091301500.01.T01 | 95.38  | 2.40E+41  | 303  | Os12g0118400 | 97.48  | 3.40E+111 | 467  | 164  | NA       | japonica |              |
| maker-12-augustus-gene-9-9-mRNA-1   | 12 | DsR4986.111931300.01.T01 | 94.96  | 0.00E+00  | 2186 | Os12g0118400 | 100.00 | 0.00E+00  | 2549 | 363  | japonica | japonica |              |
| maker-12-augustus-gene-90-3-mRNA-1  | 12 | DsR4986.121225200.01.T01 | 98.94  | 0.00E+00  | 2393 | Os12g0255000 | 100.00 | 0.00E+00  | 2393 | 107  | NA       | japonica |              |
| maker-12-augustus-gene-90-39-mRNA-1 | 12 | DsR4986.121225200.01.T01 | 94.40  | 0.00E+00  | 2734 | Os12g0256300 | 100.00 | 0.00E+00  | 3113 | 379  | japonica | japonica |              |
| maker-12-augustus-gene-90-50-mRNA-1 | 12 | DsR4986.121222200.01.T01 | 99.84  | 0.00E+00  | 1990 | Os12g0257000 | 99.73  | 0.00E+00  | 1994 | 4    | NA       | japonica |              |
| maker-12-augustus-gene-91-2-mRNA-1  | 12 | DsR4986.121225200.01.T01 | 98.50  | 0.00E+00  | 1445 | Os12g0259800 | 81.48  | 0.00E+00  | 1684 | 1441 | indica   | japonica |              |
| maker-12-augustus-gene-91-3-mRNA-1  | 12 | DsR4986.121224200.01.T01 | 94.61  | 0.00E+00  | 2422 | Os12g0257900 | 100.00 | 0.00E+00  | 2389 | 23   | NA       | japonica | Kinase TM    |
| maker-12-augustus-gene-91-5-mRNA-1  | 12 | DsR4986.12124400.01.T01  | 99.74  | 0.00E+00  | 1395 | Os12g0258000 | 100.00 | 0.00E+00  | 1339 | 9    | NA       | japonica |              |
| maker-12-augustus-gene-92-32-mRNA-1 | 12 | DsR4986.121227900.01.T01 | 99.61  | 0.00E+00  | 3210 | Os12g0258700 | 100.00 | 0.00E+00  | 3139 | 71   | NA       | japonica |              |
| maker-12-augustus-gene-92-50-mRNA-1 | 12 | DsR4986.121225900.01.T01 | 99.71  | 0.00E+00  | 2122 | Os12g0259800 | 100.00 | 0.00E+00  | 2128 | 4    | japonica | japonica |              |
| maker-12-augustus-gene-92-6-mRNA-1  | 12 | DsR4986.121233200.01.T01 | 99.67  | 0.00E+00  | 1443 | Os12g0260500 | 100.00 | 0.00E+00  | 1656 | 13   | NA       | japonica |              |
| maker-12-augustus-gene-94-20-mRNA-1 | 12 | DsR4986.121224700.01.T01 | 98.23  | 4.96E+046 | 383  | Os12g0511200 | 77.20  | 1.17E+25  | 1497 | 454  | indica   | japonica |              |
| maker-12-augustus-gene-94-23-mRNA-1 | 12 | DsR4986.12124900.01.T01  | 98.73  | 0.00E+00  | 2795 | Os12g0261300 | 100.00 | 0.00E+00  | 2812 | 63   | NA       | japonica |              |
| maker-12-augustus-gene-95-32-mRNA-1 | 12 | DsR4986.121238900.01.T01 | 99.89  | 0.00E+00  | 1576 | Os12g0262700 | 100.00 | 0.00E+00  | 1581 | 5    | NA       | japonica |              |
| maker-12-augustus-gene-95-36-mRNA-1 | 12 | DsR4986.121237800.01.T01 | 99.88  | 0.00E+00  | 2171 | Os12g0263200 | 100.00 | 0.00E+00  | 2262 | 457  | indica   | japonica |              |
| maker-12-augustus-gene-95-46-mRNA-1 | 12 | DsR4986.121242800.01.T01 | 99.94  | 0.00E+00  | 2853 | Os12g0263100 | 100.00 | 0.00E+00  | 2857 | 4    | NA       | japonica |              |
| maker-12-augustus-gene-95-48-mRNA-1 | 12 | DsR4986.121244000.01.T01 | 94.71  | 0.00E+00  | 834  | Os12g0265300 | 84.50  | 1.05E+150 | 420  | 380  | indica   | japonica |              |
| maker-12-augustus-gene-95-50-mRNA-1 | 12 | DsR4986.121244100.01.T01 | 98.27  | 0.00E+00  | 1086 | Os12g0265200 | 100.00 | 0.00E+00  | 1148 | 52   | NA       | japonica |              |
| maker-12-augustus-gene-95-52-mRNA-1 | 12 | DsR4986.121242000.01.T01 | 90.97  | 0.00E+00  | 954  | Os12g0263200 | 84.79  | 0.00E+00  | 738  | 176  | indica   | japonica |              |
| maker-12-augustus-gene-96-18-mRNA-1 | 12 | DsR4986.121249000.01.T01 | 100.00 | 0.00E+00  | 1795 | Os12g0265100 | 100.00 | 0.00E+00  | 1795 | 0    | NA       | japonica |              |
| maker-12-augustus-gene-97-1-mRNA-1  | 12 | DsR4986.121235000.01.T01 | 95.61  | 0.00E+00  | 1865 | Os12g0265600 | 100.00 | 0.00E+00  | 1339 | 558  | indica   | japonica |              |
| maker-12-augustus-gene-97-10-mRNA-1 | 12 | DsR4986.121252000.01.T01 | 99.46  | 0.00E+00  | 1979 | Os12g0265200 | 99.91  | 0.00E+00  | 2000 | 71   | NA       | japonica |              |
| maker-12-augustus-gene-97-8-mRNA-1  | 12 | DsR4986.121251800.01.T01 | 99.71  | 0.00E+00  | 1838 | Os12g0265900 | 100.00 | 0.00E+00  | 2760 | 922  | japonica | japonica | CC-kinase TM |
| maker-12-augustus-gene-98-2-mRNA-1  | 12 | DsR4986.091408700.01.T01 | 95.60  | 4.26E+32  | 439  | Os12g0267300 | 80.00  | 1.15E+163 | 374  | 235  | japonica | japonica |              |
| maker-12-augustus-gene-98-3-mRNA-1  | 12 | DsR4986.121257500.01.T01 | 99.91  | 0.00E+00  | 2567 | Os12g0267200 | 100.00 | 0.00E+00  | 4257 | 389  | japonica | japonica |              |
| maker-12-augustus-gene-98-8-mRNA-1  | 12 | DsR4986.121240700.01.T01 | 96.90  | 0.00E+00  | 997  | Os12g0267700 | 100.00 | 0.00E+00  | 985  | 26   | NA       | japonica |              |
