# Supplementary material for: Development and Genome-Wide Analysis of a Blast-Resistant japonica Rice Variety
Source: MDPI journal article supplement (doi:10.3390/plants12203536), 2023-10-11
Supplement: s1 [file s1]

**Supplemental Table S1.** Matrix of distances between the COPSEMAR9 assembly and *indica* and *japonica* fully sequenced genomes. Genome sequences were retrieved from the NCBI Genomes database. Lower values correspond to higher similarities. The matrix was produced using the software MASH.

| Distance        | Genotype | Final_Assembly | GCA_000004655.2 | GCA_000149285.1 | GCA_000164945.1 | GCA_000321445.1 | GCA_000725085.2 | GCA_000817615.1 |
|-----------------|----------|----------------|-----------------|-----------------|-----------------|-----------------|-----------------|-----------------|
| Final_Assembly  | Hybrid   | 0              | 0,0132573       | 0,00574147      | 0,00508714      | 0,00445566      | 0,0167251       | 0,00492718      |
| GCA_000004655.2 | Indica   | 0,0132573      | 0               | 0,0147665       | 0,0140996       | 0,0135016       | 0,0123533       | 0,0135016       |
| GCA_000149285.1 | Japonica | 0,00574147     | 0,0147665       | 0               | 0,00314086      | 0,00251903      | 0,0175939       | 0,00334352      |
| GCA_000164945.1 | Japonica | 0,00508714     | 0,0140996       | 0,00314086      | 0               | 0,00113443      | 0,0166117       | 0,00249129      |
| GCA_000321445.1 | Japonica | 0,00445566     | 0,0135016       | 0,00251903      | 0,00113443      | 0               | 0,0162749       | 0,00199971      |
| GCA_000725085.2 | Indica   | 0,0167251      | 0,0123533       | 0,0175939       | 0,0166117       | 0,0162749       | 0               | 0,0158882       |
| GCA_000817615.1 | Japonica | 0,00492718     | 0,0135016       | 0,00334352      | 0,00249129      | 0,00199971      | 0,0158882       | 0               |
| GCA_000817635.1 | Japonica | 0,00458019     | 0,0137986       | 0,00337267      | 0,00251903      | 0,00202665      | 0,0162749       | 0,00113443      |
| GCA_001305255.1 | Indica   | 0,0129677      | 0,00628226      | 0,0146626       | 0,0132573       | 0,0128243       | 0,0121217       | 0,0129677       |
| GCA_001618785.1 | Indica   | 0,0124         | 0,0100207       | 0,0132087       | 0,0125405       | 0,0122141       | 0,0130157       | 0,011984        |
| GCA_001618795.1 | Indica   | 0,0122141      | 0,00932572      | 0,0124467       | 0,0116661       | 0,0110882       | 0,0129677       | 0,0112643       |
| GCA_001623345.2 | Indica   | 0,0118471      | 0,00669844      | 0,0129198       | 0,0119383       | 0,0115313       | 0,0111321       | 0,011621        |
| GCA_001623365.2 | Indica   | 0,0124         | 0,00752278      | 0,0139486       | 0,0130157       | 0,0124935       | 0,0114419       | 0,0122604       |
| GCA_001889745.1 | Indica   | 0,0124935      | 0,004991        | 0,0138985       | 0,012872        | 0,0123068       | 0,0104835       | 0,0124          |
| GCA_001952365.3 | Indica   | 0,0118927      | 0,0112201       | 0,013112        | 0,011984        | 0,0118017       | 0,0121679       | 0,0117564       |
| GCA_002151415.1 | Indica   | 0,0122141      | 0,00577481      | 0,0139988       | 0,013112        | 0,0125875       | 0,0105688       | 0,0124467       |
| GCA_003865235.1 | Japonica | 0,00411762     | 0,0132087       | 0,00186568      | 0,00149601      | 0,000931334     | 0,0161637       | 0,00202665      |
| GCA_009797565.1 | Japonica | 0,00439372     | 0,0132573       | 0,0034604       | 0,0026025       | 0,00197282      | 0,0160531       | 0,00213483      |
| GCA_009829395.1 | Indica   | 0,0132573      | 0,00789262      | 0,0145592       | 0,0133059       | 0,013112        | 0,0111761       | 0,0130638       |
| GCA_009830595.1 | Japonica | 0,00414809     | 0,0132573       | 0,00734051      | 0,0064892       | 0,00590877      | 0,015998        | 0,00587519      |
| GCA_009831025.1 | Indica   | 0,0124935      | 0,00804257      | 0,0141502       | 0,0136991       | 0,0130638       | 0,0109136       | 0,0130157       |
| GCA_009831045.1 | Indica   | 0,0121679      | 0,00515153      | 0,0135016       | 0,0124935       | 0,0120298       | 0,0106116       | 0,0118927       |
| GCA_009831255.1 | Japonica | 0,00800497     | 0,0127767       | 0,00969064      | 0,00877107      | 0,00804257      | 0,0152404       | 0,00834599      |
| GCA_009831275.1 | Japonica | 0,00557568     | 0,012872        | 0,00759618      | 0,00673355      | 0,00604372      | 0,0158882       | 0,00638544      |
| GCA_009831295.1 | Indica   | 0,0130638      | 0,00737682      | 0,0142518       | 0,0134036       | 0,0129198       | 0,0106545       | 0,0128243       |
| GCA_009831315.1 | Japonica | 0,00550978     | 0,0132087       | 0,00712406      | 0,006248        | 0,00557568      | 0,0154006       | 0,00594242      |
| GCA_009831335.1 | Indica   | 0,0134525      | 0,011621        | 0,0149759       | 0,0138985       | 0,0136002       | 0,0135508       | 0,0134036       |
| GCA_009831355.1 | Indica   | 0,0124935      | 0,00834599      | 0,0142009       | 0,0135508       | 0,012872        | 0,0101878       | 0,0130157       |
| GCA_014526345.1 | Japonica | 0,00473708     | 0,0129677       | 0,00325637      | 0,00232584      | 0,00178577      | 0,0158882       | 0,00173271      |
| GCF_001433935.1 | Japonica | 0,00411762     | 0,0133059       | 0,00191916      | 0,00136596      | 0,000805673     | 0,0162749       | 0,00210772      |

| GCA_000817635.1 | GCA_001305255.1 | GCA_001618785.1 | GCA_001618795.1 | GCA_001623345.2 | GCA_001623365.2 | GCA_001889745.1 | GCA_001952365.3 | GCA_002151415.1 |
|-----------------|-----------------|-----------------|-----------------|-----------------|-----------------|-----------------|-----------------|-----------------|
| 0,00458019      | 0,0129677       | 0,0124          | 0,0122141       | 0,0118471       | 0,0124          | 0,0124935       | 0,0118927       | 0,0122141       |
| 0,0137986       | 0,00628226      | 0,0100207       | 0,00932572      | 0,00669844      | 0,00752278      | 0,004991        | 0,0112201       | 0,00577481      |
| 0,00337267      | 0,0146626       | 0,0132087       | 0,0124467       | 0,0129198       | 0,0139486       | 0,0138985       | 0,013112        | 0,0139988       |
| 0,00251903      | 0,0132573       | 0,0125405       | 0,0116661       | 0,0119383       | 0,0130157       | 0,012872        | 0,011984        | 0,013112        |
| 0,00202665      | 0,0128243       | 0,0122141       | 0,0110882       | 0,0115313       | 0,0124935       | 0,0123068       | 0,0118017       | 0,0125875       |
| 0,0162749       | 0,0121217       | 0,0130157       | 0,0129677       | 0,0111321       | 0,0114419       | 0,0104835       | 0,0121679       | 0,0105688       |
| 0,00113443      | 0,0129677       | 0,011984        | 0,0112643       | 0,011621        | 0,0122604       | 0,0124          | 0,0117564       | 0,0124467       |
| 0               | 0,0129677       | 0,0123533       | 0,0113529       | 0,0120298       | 0,012872        | 0,0128243       | 0,0122604       | 0,0127293       |
| 0,0129677       | 0               | 0,00944662      | 0,0090861       | 0,00691005      | 0,00741321      | 0,00584167      | 0,0107836       | 0,00662843      |
| 0,0123533       | 0,00944662      | 0               | 0,00932572      | 0,00920555      | 0,00396608      | 0,00838426      | 0,0113974       | 0,00673355      |
| 0,0113529       | 0,0090861       | 0,00932572      | 0               | 0,00378594      | 0,00904645      | 0,00734051      | 0,0108269       | 0,00826969      |
| 0,0120298       | 0,00691005      | 0,00920555      | 0,00378594      | 0               | 0,0064892       | 0,00454897      | 0,00964976      | 0,00550978      |
| 0,012872        | 0,00741321      | 0,00396608      | 0,00904645      | 0,0064892       | 0               | 0,00524853      | 0,0101459       | 0,00354859      |
| 0,0128243       | 0,00584167      | 0,00838426      | 0,00734051      | 0,00454897      | 0,00524853      | 0               | 0,00916565      | 0,0037263       |
| 0,0122604       | 0,0107836       | 0,0113974       | 0,0108269       | 0,00964976      | 0,0101459       | 0,00916565      | 0               | 0,0090861       |
| 0,0127293       | 0,00662843      | 0,00673355      | 0,00826969      | 0,00550978      | 0,00354859      | 0,0037263       | 0,0090861       | 0               |
| 0,00194597      | 0,0127767       | 0,0117112       | 0,0106116       | 0,0113974       | 0,0123068       | 0,0121679       | 0,0114419       | 0,0124935       |
| 0,00227104      | 0,0126347       | 0,0120298       | 0,0109571       | 0,0110007       | 0,0120298       | 0,0118927       | 0,0113086       | 0,0123068       |
| 0,0134525       | 0,00785531      | 0,00900687      | 0,00952763      | 0,00712406      | 0,00673355      | 0,00614558      | 0,0103986       | 0,00631659      |
| 0,00628226      | 0,0132087       | 0,0124467       | 0,0121679       | 0,0113529       | 0,0115313       | 0,0124467       | 0,0112201       | 0,0121217       |
| 0,013112        | 0,00774383      | 0,00924552      | 0,00900687      | 0,00611156      | 0,0064892       | 0,00590877      | 0,00960897      | 0,00580821      |
| 0,0123068       | 0,00577481      | 0,00808024      | 0,00785531      | 0,00524853      | 0,00495906      | 0,00191916      | 0,00904645      | 0,00322742      |
| 0,00865422      | 0,0124          | 0,0124935       | 0,0118927       | 0,0110882       | 0,0120757       | 0,0115761       | 0,0106974       | 0,0115761       |
| 0,00666341      | 0,0125875       | 0,0120757       | 0,0113974       | 0,0108269       | 0,0114419       | 0,0118017       | 0,0114419       | 0,0118017       |
| 0,013112        | 0,00737682      | 0,00826969      | 0,00892796      | 0,00617965      | 0,00557568      | 0,00524853      | 0,00989629      | 0,00587519      |
| 0,00641996      | 0,0132087       | 0,0126819       | 0,0122141       | 0,0113974       | 0,0122604       | 0,011984        | 0,0113974       | 0,0125875       |
| 0,0136991       | 0,0111321       | 0,0121679       | 0,0114419       | 0,0100207       | 0,0106974       | 0,00944662      | 0,00604372      | 0,00960897      |
| 0,0131603       | 0,00811798      | 0,00916565      | 0,00846101      | 0,00604372      | 0,00687462      | 0,00607761      | 0,00892796      | 0,00607761      |
| 0,0018924       | 0,0126347       | 0,0118017       | 0,0110007       | 0,0113974       | 0,0119383       | 0,0121217       | 0,011621        | 0,0120298       |
| 0,00202665      | 0,0128243       | 0,0118017       | 0,0106974       | 0,0114865       | 0,0124          | 0,0122604       | 0,0115313       | 0,0125875       |

| GCA_003865235.1 | GCA_009797565.1 | GCA_009829395.1 | GCA_009830595.1 | GCA_009831025.1 | GCA_009831045.1 | GCA_009831255.1 | GCA_009831275.1 | GCA_009831295.1 |
|-----------------|-----------------|-----------------|-----------------|-----------------|-----------------|-----------------|-----------------|-----------------|
| 0,00411762      | 0,00439372      | 0,0132573       | 0,00414809      | 0,0124935       | 0,0121679       | 0,00800497      | 0,00557568      | 0,0130638       |
| 0,0132087       | 0,0132573       | 0,00789262      | 0,0132573       | 0,00804257      | 0,00515153      | 0,0127767       | 0,012872        | 0,00737682      |
| 0,00186568      | 0,0034604       | 0,0145592       | 0,00734051      | 0,0141502       | 0,0135016       | 0,00969064      | 0,00759618      | 0,0142518       |
| 0,00149601      | 0,0026025       | 0,0133059       | 0,0064892       | 0,0136991       | 0,0124935       | 0,00877107      | 0,00673355      | 0,0134036       |
| 0,000931334     | 0,00197282      | 0,013112        | 0,00590877      | 0,0130638       | 0,0120298       | 0,00804257      | 0,00604372      | 0,0129198       |
| 0,0161637       | 0,0160531       | 0,0111761       | 0,015998        | 0,0109136       | 0,0106116       | 0,0152404       | 0,0158882       | 0,0106545       |
| 0,00202665      | 0,00213483      | 0,0130638       | 0,00587519      | 0,0130157       | 0,0118927       | 0,00834599      | 0,00638544      | 0,0128243       |
| 0,00194597      | 0,00227104      | 0,0134525       | 0,00628226      | 0,013112        | 0,0123068       | 0,00865422      | 0,00666341      | 0,013112        |
| 0,0127767       | 0,0126347       | 0,00785531      | 0,0132087       | 0,00774383      | 0,00577481      | 0,0124          | 0,0125875       | 0,00737682      |
| 0,0117112       | 0,0120298       | 0,00900687      | 0,0124467       | 0,00924552      | 0,00808024      | 0,0124935       | 0,0120757       | 0,00826969      |
| 0,0106116       | 0,0109571       | 0,00952763      | 0,0121679       | 0,00900687      | 0,00785531      | 0,0118927       | 0,0113974       | 0,00892796      |
| 0,0113974       | 0,0110007       | 0,00712406      | 0,0113529       | 0,00611156      | 0,00524853      | 0,0110882       | 0,0108269       | 0,00617965      |
| 0,0123068       | 0,0120298       | 0,00673355      | 0,0115313       | 0,0064892       | 0,00495906      | 0,0120757       | 0,0114419       | 0,00557568      |
| 0,0121679       | 0,0118927       | 0,00614558      | 0,0124467       | 0,00590877      | 0,00191916      | 0,0115761       | 0,0118017       | 0,00524853      |
| 0,0114419       | 0,0113086       | 0,0103986       | 0,0112201       | 0,00960897      | 0,00904645      | 0,0106974       | 0,0114419       | 0,00989629      |
| 0,0124935       | 0,0123068       | 0,00631659      | 0,0121217       | 0,00580821      | 0,00322742      | 0,0115761       | 0,0118017       | 0,00587519      |
| 0               | 0,00167981      | 0,0128243       | 0,00580821      | 0,0127293       | 0,0118017       | 0,00800497      | 0,00614558      | 0,0125405       |
| 0,00167981      | 0               | 0,0130157       | 0,00544411      | 0,0127293       | 0,0115313       | 0,00763299      | 0,00611156      | 0,0124935       |
| 0,0128243       | 0,0130157       | 0               | 0,0126819       | 0,00607761      | 0,00680395      | 0,0114419       | 0,0123068       | 0,00528099      |
| 0,00580821      | 0,00544411      | 0,0126819       | 0               | 0,0123068       | 0,0118927       | 0,00755945      | 0,00518381      | 0,0124467       |
| 0,0127293       | 0,0127293       | 0,00607761      | 0,0123068       | 0               | 0,00641996      | 0,0115313       | 0,0123068       | 0,00518381      |
| 0,0118017       | 0,0115313       | 0,00680395      | 0,0118927       | 0,00641996      | 0               | 0,0110882       | 0,0113974       | 0,00567497      |
| 0,00800497      | 0,00763299      | 0,0114419       | 0,00755945      | 0,0115313       | 0,0110882       | 0               | 0,00759618      | 0,0121679       |
| 0,00614558      | 0,00611156      | 0,0123068       | 0,00518381      | 0,0123068       | 0,0113974       | 0,00759618      | 0               | 0,0128243       |
| 0,0125405       | 0,0124935       | 0,00528099      | 0,0124467       | 0,00518381      | 0,00567497      | 0,0121679       | 0,0128243       | 0               |
| 0,00557568      | 0,00550978      | 0,0124          | 0,00467416      | 0,0124467       | 0,0117112       | 0,00723198      | 0,00531349      | 0,0123533       |
| 0,0132087       | 0,0133547       | 0,0100623       | 0,0125875       | 0,0097316       | 0,00977265      | 0,0117112       | 0,0133547       | 0,0100623       |
| 0,0126819       | 0,0123068       | 0,00759618      | 0,0120757       | 0,00641996      | 0,00628226      | 0,0115313       | 0,0124935       | 0,00621379      |
| 0,00167981      | 0,00199971      | 0,0127293       | 0,00614558      | 0,0125405       | 0,0115761       | 0,0081558       | 0,00628226      | 0,0124935       |
| 0,000119496     | 0,00170624      | 0,0129198       | 0,00580821      | 0,0128243       | 0,0118927       | 0,00804257      | 0,00607761      | 0,0126347       |

| GCA_009831315.1 | GCA_009831335.1 | GCA_009831355.1 | GCA_014526345.1 | GCF_001433935.1 |
|-----------------|-----------------|-----------------|-----------------|-----------------|
| 0,00550978      | 0,0134525       | 0,0124935       | 0,00473708      | 0,00411762      |
| 0,0132087       | 0,011621        | 0,00834599      | 0,0129677       | 0,0133059       |
| 0,00712406      | 0,0149759       | 0,0142009       | 0,00325637      | 0,00191916      |
| 0,006248        | 0,0138985       | 0,0135508       | 0,00232584      | 0,00136596      |
| 0,00557568      | 0,0136002       | 0,012872        | 0,00178577      | 0,000805673     |
| 0,0154006       | 0,0135508       | 0,0101878       | 0,0158882       | 0,0162749       |
| 0,00594242      | 0,0134036       | 0,0130157       | 0,00173271      | 0,00210772      |
| 0,00641996      | 0,0136991       | 0,0131603       | 0,0018924       | 0,00202665      |
| 0,0132087       | 0,0111321       | 0,00811798      | 0,0126347       | 0,0128243       |
| 0,0126819       | 0,0121679       | 0,00916565      | 0,0118017       | 0,0118017       |
| 0,0122141       | 0,0114419       | 0,00846101      | 0,0110007       | 0,0106974       |
| 0,0113974       | 0,0100207       | 0,00604372      | 0,0113974       | 0,0114865       |
| 0,0122604       | 0,0106974       | 0,00687462      | 0,0119383       | 0,0124          |
| 0,011984        | 0,00944662      | 0,00607761      | 0,0121217       | 0,0122604       |
| 0,0113974       | 0,00604372      | 0,00892796      | 0,011621        | 0,0115313       |
| 0,0125875       | 0,00960897      | 0,00607761      | 0,0120298       | 0,0125875       |
| 0,00557568      | 0,0132087       | 0,0126819       | 0,00167981      | 0,000119496     |
| 0,00550978      | 0,0133547       | 0,0123068       | 0,00199971      | 0,00170624      |
| 0,0124          | 0,0100623       | 0,00759618      | 0,0127293       | 0,0129198       |
| 0,00467416      | 0,0125875       | 0,0120757       | 0,00614558      | 0,00580821      |
| 0,0124467       | 0,0097316       | 0,00641996      | 0,0125405       | 0,0128243       |
| 0,0117112       | 0,00977265      | 0,00628226      | 0,0115761       | 0,0118927       |
| 0,00723198      | 0,0117112       | 0,0115313       | 0,0081558       | 0,00804257      |
| 0,00531349      | 0,0133547       | 0,0124935       | 0,00628226      | 0,00607761      |
| 0,0123533       | 0,0100623       | 0,00621379      | 0,0124935       | 0,0126347       |
| 0               | 0,0132573       | 0,0127767       | 0,00604372      | 0,00550978      |
| 0,0132573       | 0               | 0,00956826      | 0,0136991       | 0,0133059       |
| 0,0127767       | 0,00956826      | 0               | 0,0125405       | 0,0127767       |
| 0,00604372      | 0,0136991       | 0,0125405       | 0               | 0,00170624      |
| 0,00550978      | 0,0133059       | 0,0127767       | 0,00170624      | 0               |
