# Supplementary material for: Development and Genome-Wide Analysis of a Blast-Resistant japonica Rice Variety
Source: MDPI journal article supplement (doi:10.3390/plants12203536), 2023-10-11
Supplement: s1 [file s1]

**Supplemental Table S5.** Chromosomal coordinates and nucleotide sequences of *Pi1*, *Pi2* and *Pi33*.

[illegible]
