# Supplementary material for: Development and Genome-Wide Analysis of a Blast-Resistant japonica Rice Variety
Source: Plants (Basel). 2023 Oct 11;12(20):3536. doi: 10.3390/plants12203536 (PMC10667994; doi:10.3390/plants12203536)
Supplement: Supplementary file 1 [file plants-12-03536-s001.zip]

Archive with 9 entries (9 files):
- Supplementary Material Escol_Suppl Fig S1 Leaves Panicles Field.pdf
- Supplementary Material Escol_Suppl Fig S2 BUSCO analysis.pdf
- Supplementary Material Escol_Suppl Fig S3 PCA Jap Ind Hybrid.pdf
- Supplementary Material Escol_Suppl Fig S4 Design field experiments.pdf
- Supplementary Material Escol_Suppl Table S1 Distance Matrix.pdf
- Supplementary Material Escol_Suppl Table S2 List of genes in COPSEMAR9.pdf
- Supplementary Material Escol_Suppl Table S3 Homologues in jap and ind.pdf
- Supplementary Material Escol_Suppl Table S4 R_defense-related genes.pdf
- Supplementary Material Escol_Suppl Table S5 Pi1 Pi2 Pi33.pdf
